# Supplementary material
Source: publisher site journal article supplement (https://www.dovepress.com/article/73551)
Supplement: Supplementary file 1 [file get_supplementary_file.php%3Ff%3D73551_1.pdf]

**Supplementary Table 1. A full list of cancer genes.**

| <b>Gene Symbol</b> | <b>Gene full name</b>                                                | <b>Entrez Gene ID</b> | <b>Chr</b> | <b>Chr Band</b> | <b>Somatic</b> | <b>Germline</b> | <b>Tumour Types (Somatic)</b> | <b>Tumour Types (Germline)</b> | <b>Cancer Synd</b> | <b>Tissue Type</b> | <b>Molecular Genetics</b> | <b>Mut Types</b> | <b>Translocation Partner</b> | <b>Other Germline Mut</b> | <b>Other Synd</b> | <b>Syn</b>                                                                  |
|--------------------|----------------------------------------------------------------------|-----------------------|------------|-----------------|----------------|-----------------|-------------------------------|--------------------------------|--------------------|--------------------|---------------------------|------------------|------------------------------|---------------------------|-------------------|-----------------------------------------------------------------------------|
| <b>ABI1</b>        | Abl-interactor 1                                                     | 10006                 | 10         | 10p11.2         | yes            |                 | AML                           |                                |                    | L                  | Dom                       | T                | MLL                          |                           |                   | ABI1; E3B1; ABI-1; SSH3BP1; 10006                                           |
| <b>ABL1</b>        | V-abl Abelson murine leukemia viral oncogene homolog 1               | 25                    | 9          | 9q34.1          | yes            |                 | CML; ALL; T-ALL               |                                |                    | L                  | Dom                       | T; Mis           | BCR; ETV6; NUP214            |                           |                   | ABL1; p150; ABL; c-ABL; JTK7; bcr/abl; v-abl; P00519; 25; ENSG00000097007   |
| <b>ABL2</b>        | C-abl oncogene 2; non-receptor tyrosine kinase                       | 27                    | 1          | 1q24-q25        | yes            |                 | AML                           |                                |                    | L                  | Dom                       | T                | ETV6                         |                           |                   | ABL2; ARG; RP11-177A2_3; ABLL; ENSG00000143322; P42684; 27                  |
| <b>ACSL3</b>       | Acyl-coa synthetase long-chain family member 3                       | 2181                  | 2          | 2q36            | yes            |                 | Prostate                      |                                |                    | E                  | Dom                       | T                | ETV1                         |                           |                   | 2181; ASPM; PRO2194; ACS3; FACL3; O95573; ENSG00000123983; ACSL3            |
| <b>AF15Q14</b>     | AF15q14 protein                                                      | 57082                 | 15         | 15q14           | yes            |                 | AML                           |                                |                    | L                  | Dom                       | T                | MLL                          |                           |                   | CASC5; AF15Q14; Q8NG31; D40; ENSG00000137812; 57082                         |
| <b>AF1Q</b>        | ALL1-fused gene from chromosome 1q                                   | 10962                 | 1          | 1q21            | yes            |                 | ALL                           |                                |                    | L                  | Dom                       | T                | MLL                          |                           |                   | MLLT11; Q13015; AF1Q; ENSG00000213190; 10962                                |
| <b>AF3p21</b>      | SH3 protein interacting with Nck; 90 kda (ALL1 fused gene from 3p21) | 51517                 | 3          | 3p21            | yes            |                 | ALL                           |                                |                    | L                  | Dom                       | T                | MLL                          |                           |                   | Q9NZQ3; AF3P21; WISH; ORF1; WASLBP; SPIN90; ENSG00000213672; NCKIPSD; 51517 |
| <b>AF5q31</b>      | ALL1 fused gene from 5q31                                            | 27125                 | 5          | 5q31            | yes            |                 | ALL                           |                                |                    | L                  | Dom                       | T                | MLL                          |                           |                   | 27125; Q9UHB7; MCEF; AF5Q31; ENSG00000072364; AFF4                          |

|              |                                                 |       |    |               |     |     |                                    |               |                        |         |     |           |                                                                           |  |  |                                                                                                                   |
|--------------|-------------------------------------------------|-------|----|---------------|-----|-----|------------------------------------|---------------|------------------------|---------|-----|-----------|---------------------------------------------------------------------------|--|--|-------------------------------------------------------------------------------------------------------------------|
| <b>AKAP9</b> | A kinase (PRKA) anchor protein (yotiao) 9       | 10142 | 7  | 7q21-q22      | yes |     | Papillary thyroid                  |               |                        | E       | Dom | T         | BRAF                                                                      |  |  | KIAA0803; AKAP350; CG-NAP; MU-RMS-40_16A; PRKA9; YOTIAO; HYPERION; AKAP450; Q99996; ENSG00000127914; 10142; AKAP9 |
| <b>AKT1</b>  | V-akt murine thymoma viral oncogene homolog 1   | 207   | 14 | 14q32.32      | yes |     | Breast; colorectal; ovarian; NSCLC |               |                        | E       | Dom | Mis       |                                                                           |  |  | P31749; AKT1_NEW; 207; ENSG00000142208; AKT; MGC99656; PKB; PKB-ALPHA; PRKBA; RAC; RAC-ALPHA                      |
| <b>AKT2</b>  | V-akt murine thymoma viral oncogene homolog 2   | 208   | 19 | 19q13.1-q13.2 | yes |     | Ovarian; pancreatic                |               |                        | E       | Dom | A         |                                                                           |  |  | AKT2; PRKBB; P31751; RAC-BETA; ENSG00000105221; 208; PKBBETA                                                      |
| <b>ALDH2</b> | Aldehyde dehydrogenase 2 family (mitochondrial) | 217   | 12 | 12q24.2       | yes |     | Leiomyoma                          |               |                        | M       | Dom | T         | HMGA2                                                                     |  |  | ALDH2; ALDHI; ALDM; MGC1806; P05091; ALDH-E2; ENSG00000111275; 217                                                |
| <b>ALK</b>   | Anaplastic lymphoma kinase (Ki-1)               | 238   | 2  | 2p23          | yes | yes | ALCL; NSCLC; neuroblastoma         | Neuroblastoma | Familial neuroblastoma | L; E; M | Dom | T; Mis; A | NPM1; TPM3; TFG; TPM4; ATIC; CLTC; MSN; ALO17; CARS; EML4; KIF5B; C2orf22 |  |  | ENSG00000171094; CD246; TFG/ALK; Q9UM73; ALK; 238                                                                 |
| <b>ALO17</b> | KIAA1618 protein                                | 57674 | 17 | 17q25.3       | yes |     | ALCL                               |               |                        | L       | Dom | T         | ALK                                                                       |  |  | 57674; ENSG00000173821; C17orf27; KIAA1554; Q63HN8; RNF213                                                        |

|                 |                                                        |        |    |         |     |     |                                                                    |                                                                    |                                             |         |     |                 |      |  |                                                                                                       |
|-----------------|--------------------------------------------------------|--------|----|---------|-----|-----|--------------------------------------------------------------------|--------------------------------------------------------------------|---------------------------------------------|---------|-----|-----------------|------|--|-------------------------------------------------------------------------------------------------------|
| <b>AMER1</b>    | APC membrane recruitment protein 1                     | 139285 | X  | Xq11.2  | yes |     | Wilms tumour                                                       |                                                                    |                                             | O       | Rec | F; D; N; Mis    |      |  | AMER1; RP11-403E24_2; WTX; FLJ39827; ENSG00000184675; FAM123B; 139285                                 |
| <b>APC</b>      | Adenomatous polyposis of the colon gene                | 324    | 5  | 5q21    | yes | yes | Colorectal; pancreatic; desmoid; hepatoblastoma; glioma; other CNS | Colorectal; pancreatic; desmoid; hepatoblastoma; glioma; other CNS | Adenomatous polyposis coli; Turcot syndrome | E; M; O | Rec | D; Mis; N; F; S |      |  | 324; DP2; DP2_5; DP3; GS; FPC; FAP; ENSG00000134982; P25054; APC                                      |
| <b>ARHGEF12</b> | RHO guanine nucleotide exchange factor (GEF) 12 (LARG) | 23365  | 11 | 11q23.3 | yes |     | AML                                                                |                                                                    |                                             | L       | Dom | T               | MLL  |  | 23365; Q9NZN5; PRO2792; DKFZp686O2372; LARG; KIAA0382; ENSG00000196914; ARHGEF12                      |
| <b>ARHH</b>     | RAS homolog gene family; member H (TTF)                | 399    | 4  | 4p13    | yes |     | NHL                                                                |                                                                    |                                             | L       | Dom | T               | BCL6 |  | RHOH; TTF; RhoH; ARHH; ENSG00000168421; 399                                                           |
| <b>ARID1A</b>   | AT rich interactive domain 1A (SWI-like)               | 8289   | 1  | 1p35.3  | yes |     | Clear cell ovarian carcinoma; RCC                                  |                                                                    |                                             | E       | Rec | Mis; N; F; S; D |      |  | 8289; BAF250; BAF250a; P270; RP1-50O24_1; B120; BM029; C1orf4; SMARCF1; ENSG00000117713; ARID1A       |
| <b>ARID2</b>    | AT rich interactive domain 2                           | 196528 | 12 | 12q12   | yes |     | Hepatocellular carcinoma                                           |                                                                    |                                             | E       | Rec | N; S; F         |      |  | 196528; ENSG00000189079; BAF200; DKFZp686G052; DKFZp779P0222; FLJ30619; KIAA1557; p200; Q68CP9; ARID2 |

|                |                                                                                    |        |    |         |     |     |                                                                    |                                              |                       |      |     |                 |            |  |                                                                                                        |
|----------------|------------------------------------------------------------------------------------|--------|----|---------|-----|-----|--------------------------------------------------------------------|----------------------------------------------|-----------------------|------|-----|-----------------|------------|--|--------------------------------------------------------------------------------------------------------|
| <b>ARNT</b>    | Aryl hydrocarbon receptor nuclear translocator                                     | 405    | 1  | 1q21    | yes |     | AML                                                                |                                              |                       | L    | Dom | T               | ETV6       |  | ARNT; HIF1BETA; TANGO; HIF1B; HIF-1beta; P27540; ENSG00000143437; 405                                  |
| <b>ASPSCR1</b> | Alveolar soft part sarcoma chromosome region; candidate 1                          | 79058  | 17 | 17q25   | yes |     | Alveolar soft part sarcoma                                         |                                              |                       | M    | Dom | T               | TFE3       |  | 79058; Q9BZE9; ENSG00000169696; ASPSCR1                                                                |
| <b>ASXL1</b>   | Additional sex combs like 1                                                        | 171023 | 20 | 20q11.1 | yes |     | MDS; CMML                                                          |                                              |                       | L    | Rec | F; N; Mis       |            |  | 171023; KIAA0978; MGC117280; MGC71111; Q8IXJ9; ENSG00000171456; ASXL1                                  |
| <b>ATF1</b>    | Activating transcription factor 1                                                  | 466    | 12 | 12q13   | yes |     | Malignant melanoma of soft parts; angiomatoid fibrous histiocytoma |                                              |                       | E; M | Dom | T               | EWSR1; FUS |  | 466; TREB36; P18846; ENSG00000123268; ATF1                                                             |
| <b>ATIC</b>    | 5-Aminoimidazole-4-carboxamide ribonucleotide formyltransferase/IMP cyclohydrolase | 471    | 2  | 2q35    | yes |     | ALCL                                                               |                                              |                       | L    | Dom | T               | ALK        |  | P31939; IMPCHASE; PURH; AICARFT; ENSG00000138363; 471; ATIC                                            |
| <b>ATM</b>     | Ataxia telangiectasia mutated                                                      | 472    | 11 | 11q22.3 | yes | yes | T-PLL                                                              | Leukaemia; lymphoma; medulloblastoma; glioma | Ataxia-telangiectasia | L; O | Rec | D; Mis; N; F; S |            |  | 472; TELO1; ATA; ATC; ATDC; MGC74674; Q13315; AT1; DKFZp781A0353; ATE; ATD; TEL1; ENSG00000149311; ATM |

|               |                                                                           |      |    |               |     |     |                                                                                                           |                              |  |      |     |                 |     |                                                       |                                                                                                      |
|---------------|---------------------------------------------------------------------------|------|----|---------------|-----|-----|-----------------------------------------------------------------------------------------------------------|------------------------------|--|------|-----|-----------------|-----|-------------------------------------------------------|------------------------------------------------------------------------------------------------------|
| <b>ATP1A1</b> | ATPase; Na <sup>+</sup> /K <sup>+</sup> transporting; alpha 1 polypeptide | 476  | 1  | p21           | yes |     | Adrenal aldosterone producing adenoma                                                                     |                              |  | E    | Dom | Mis; O          |     |                                                       | P05023; ATP1A1; 476; ENSG00000163399; MGC3285; MGC51750                                              |
| <b>ATP2B3</b> | ATPase; Ca <sup>++</sup> transporting; plasma membrane 3                  | 492  | X  | q28           | yes |     | Adrenal aldosterone producing adenoma                                                                     |                              |  | E    | Dom | O               |     |                                                       | ATP2B3; PMCA3; ENSG00000067842; 492                                                                  |
| <b>ATRX</b>   | Alpha thalassemia/mental retardation syndrome X-linked                    | 546  | X  | Xq21.1        | yes |     | Pancreatic neuroendocrine tumours; paediatric GBM                                                         |                              |  | E    | Rec | Mis; F; N       | yes | ATR-X (alpha thalassemia/mental retardation) syndrome | P46100; ATRX_ENST00000373344; 546; ATR2; MGC2094; MRXHF1; RAD54; RAD54L; SFM1; SHS; XH2; XNP; ZNF-HX |
| <b>AXIN1</b>  | Axin 1                                                                    | 8312 | 16 | 16p13.3       | yes | yes | Colorectal; endometrial; prostate and hepatocellular carcinomas; hepatoblastoma; sporadic medulloblastoma |                              |  | E; O | Rec | D; Mis; N; F; S |     |                                                       | 8312; LA16c-314G4_3; MGC52315; AXIN; ENSG00000103126; O15169; AXIN1                                  |
| <b>BAP1</b>   | BRCA1 associated protein-1 (ubiquitin carboxy-terminal hydrolase)         | 8314 | 3  | 3p21.31-p21.2 | yes |     | Uveal melanoma; breast; NSCLC; RCC                                                                        | Mesothelioma; uveal melanoma |  | E    | Rec | N; Mis; F; S; O |     |                                                       | 8314; DKFZp686N04275; FLJ37180; HUCEP-13; hucep-6; KIAA0272; ENSG00000163930; BAP1; FLJ35406; Q92560 |

|               |                                         |       |    |             |     |  |          |  |  |   |     |        |                                                                                                                                                        |  |                                                                                                                                    |
|---------------|-----------------------------------------|-------|----|-------------|-----|--|----------|--|--|---|-----|--------|--------------------------------------------------------------------------------------------------------------------------------------------------------|--|------------------------------------------------------------------------------------------------------------------------------------|
| <b>BCL10</b>  | B-cell<br>CLL/lymphoma<br>a 10          | 8915  | 1  | 1p22        | yes |  | MALT     |  |  | L | Dom | T      | IGH@                                                                                                                                                   |  | BCL10; CIPER; CLAP;<br>mE10; CARMEN; c-<br>E10;<br>ENSG00000142867;<br>8915                                                        |
| <b>BCL11A</b> | B-cell<br>CLL/lymphoma<br>a 11A         | 53335 | 2  | 2p13        | yes |  | B-CLL    |  |  | L | Dom | T      | IGH@                                                                                                                                                   |  | KIAA1809; BCL11A-L;<br>FLJ10173; EVI9;<br>Q9H165; BCL11A-XL;<br>BCL11A-S; CTIP1;<br>FLJ34997;<br>ENSG00000119866;<br>53335; BCL11A |
| <b>BCL11B</b> | B-cell<br>CLL/lymphoma<br>a 11B (CTIP2) | 64919 | 14 | 14q32.<br>1 | yes |  | T-ALL    |  |  | L | Dom | T      | TLX3                                                                                                                                                   |  | BCL11B; RIT1; CTIP-<br>2; Q9C0K0; hRIT1-<br>alpha; CTIP2; 64919;<br>ENSG00000127152                                                |
| <b>BCL2</b>   | B-cell<br>CLL/lymphoma<br>a 2           | 596   | 18 | 18q21.<br>3 | yes |  | NHL; CLL |  |  | L | Dom | T      | IGH@                                                                                                                                                   |  | BCL2; Bcl-2;<br>ENSG00000171791;<br>596                                                                                            |
| <b>BCL3</b>   | B-cell<br>CLL/lymphoma<br>a 3           | 602   | 19 | 19q13       | yes |  | CLL      |  |  | L | Dom | T      | IGH@                                                                                                                                                   |  | BCL3; P20749; BCL4;<br>D19S37;<br>ENSG00000069399;<br>602                                                                          |
| <b>BCL5</b>   | B-cell<br>CLL/lymphoma<br>a 5           | 603   | 17 | 17q22       | yes |  | CLL      |  |  | L | Dom | T      | MYC                                                                                                                                                    |  |                                                                                                                                    |
| <b>BCL6</b>   | B-cell<br>CLL/lymphoma<br>a 6           | 604   | 3  | 3q27        | yes |  | NHL; CLL |  |  | L | Dom | T; Mis | IG loci;<br>ZNFN1A1;<br>LCP1;<br>PIM1;<br>TFRC;<br>CIITA;<br>NACA;<br>HSPCB;<br>HSPCA;<br>HIST1H4I;<br>IL21R;<br>POU2AF1;<br>ARHH;<br>EIF4A2;<br>SFRS3 |  | BCL6A; BCL5; ZNF51;<br>LAZ3; P41182;<br>ZBTB27;<br>ENSG00000113916;<br>604; BCL6                                                   |
| <b>BCL7A</b>  | B-cell<br>CLL/lymphoma<br>a 7A          | 605   | 12 | 12q24.<br>1 | yes |  | BNHL     |  |  | L | Dom | T      | MYC                                                                                                                                                    |  | BCL7A; BCL7;<br>ENSG00000110987;<br>605                                                                                            |

|               |                                              |        |    |          |     |     |                                                             |                         |      |   |      |                    |                         |     |                                   |                                                                                                                           |
|---------------|----------------------------------------------|--------|----|----------|-----|-----|-------------------------------------------------------------|-------------------------|------|---|------|--------------------|-------------------------|-----|-----------------------------------|---------------------------------------------------------------------------------------------------------------------------|
| <b>BCL9</b>   | B-cell CLL/lymphoma 9                        | 607    | 1  | 1q21     | yes |     | B-ALL                                                       |                         |      | L | Dom  | T                  | IGH@;<br>IGL@           |     |                                   | 607; LGS;<br>MGC131591;<br>ENSG00000116128;<br>BCL9                                                                       |
| <b>BCOR</b>   | BCL6 corepressor                             | 54880  | X  | Xp11.4   | yes |     | Retinoblastoma; AML; APL (translocation)                    |                         |      |   | Rec  | F; N; S;<br>T      | RARA                    | yes | oculo-facio-cardio-dental genetic | ANOP2; MGC71031;<br>FLJ20285;<br>MGC131961;<br>KIAA1575; MCOPS2;<br>MAA2;<br>ENSG00000183337;<br>BCOR; 54880;<br>FLJ38041 |
| <b>BCR</b>    | Breakpoint cluster region                    | 613    | 22 | 22q11.21 | yes |     | CML; ALL; AML                                               |                         |      | L | Dom  | T                  | ABL1;<br>FGFR1;<br>JAK2 |     |                                   | P11274; FLJ16453;<br>PHL; ALL; D22S662;<br>CML; D22S11; BCR1;<br>BCR;<br>ENSG00000186716;<br>613                          |
| <b>BHD</b>    | Folliculin; Birt-Hogg-Dube syndrome          | 201163 | 17 | 17p11.2  |     | yes | Renal; fibrofolliculomas; trichodiscomas                    | Birt-Hogg-Dube syndrome | E; M |   | Rec? | Mis. N; F          |                         |     |                                   | 201163; BHD; FLCL;<br>MGC17998;<br>MGC23445;<br>ENSG00000154803;<br>FLCN                                                  |
| <b>BIRC3</b>  | Baculoviral IAP repeat-containing 3          | 330    | 11 | 11q22    | yes |     | CLL; MALT; MCL; MM                                          |                         |      | L | Dom  | D; F; N;<br>T; Mis | MALT1                   |     |                                   | BIRC3; AIP1; HAIP1;<br>hiap-1; RNF49;<br>MALT2; cIAP2; API2;<br>Q13489; HIAP1;<br>ENSG00000023445;<br>330; CIAP2; MIHC    |
| <b>BLM</b>    | Bloom syndrome                               | 641    | 15 | 15q26.1  |     | yes | Leukaemia; lymphoma; skin squamous cell; other tumour types | Bloom syndrome          | L; E |   | Rec  | Mis; N; F          |                         |     |                                   | RECQL3;<br>MGC131620; BS;<br>MGC126616;<br>RECQL2; RECQ2;<br>MGC131618;<br>ENSG00000197299;<br>BLM; 641                   |
| <b>BMPRIA</b> | Bone morphogenetic protein receptor; type IA | 657    | 10 | 10q22.3  |     | yes | gastrointestinal polyps                                     | Juvenile polyposis      | E    |   | Rec  | Mis; N; F          |                         |     |                                   | 657; ACVRLK3;<br>CD292; ALK3; P36894;<br>ENSG00000107779;<br>BMPRIA                                                       |

|              |                                                 |       |    |         |     |     |                                                                                                               |                                                        |                                                 |      |     |                 |                 |     |                                 |                                                                                         |
|--------------|-------------------------------------------------|-------|----|---------|-----|-----|---------------------------------------------------------------------------------------------------------------|--------------------------------------------------------|-------------------------------------------------|------|-----|-----------------|-----------------|-----|---------------------------------|-----------------------------------------------------------------------------------------|
| <b>BRAF</b>  | V-raf murine sarcoma viral oncogene homolog B1  | 673   | 7  | 7q34    | yes |     | Melanoma; colorectal; papillary thyroid; borderline ovarian; NSCLC; cholangiocarcinoma; pilocytic astrocytoma |                                                        |                                                 | E    | Dom | Mis; T; O       | AKAP9; KIAA1549 | yes | Cardio-facio-cutaneous syndrome | P15056; MGC126806; BRAF1; B-raf 1; RAFB1; MGC138284; ENSG00000157764; 673; BRAF; B-raf1 |
| <b>BRCA1</b> | Familial breast/ovarian cancer gene 1           | 672   | 17 | 17q21   | yes | yes | Ovarian                                                                                                       | Breast; ovarian                                        | Hereditary breast/ovarian cancer                | E    | Rec | D; Mis; N; F; S |                 |     |                                 | IRIS; BRCA1; PSCP; RNF53; BRCC1; ENSG0000012048; 672; BRCA1                             |
| <b>BRCA2</b> | Familial breast/ovarian cancer gene 2           | 675   | 13 | 13q12   | yes | yes | Breast; ovarian; pancreatic                                                                                   | Breast; ovarian; pancreatic; leukaemia (FANCB; FANCD1) | Hereditary breast/ovarian cancer                | L; E | Rec | D; Mis; N; F; S |                 |     |                                 | BRCA2; FAD; RP11-298P3.4; FANCB; BRCC2; FANCD1; FANCD; FAD1; FADC; ENSG00000139618; 675 |
| <b>BRD3</b>  | Bromodomain containing 3                        | 8019  | 9  | 9q34    | yes |     | Lethal midline carcinoma of young people                                                                      |                                                        |                                                 | E    | Dom | T               | C15orf55        |     |                                 | 8019; KIAA0043; RING3L; ORFX; Q15059; BRD3; ENSG00000169925                             |
| <b>BRD4</b>  | Bromodomain containing 4                        | 23476 | 19 | 19p13.1 | yes |     | Lethal midline carcinoma of young people                                                                      |                                                        |                                                 | E    | Dom | T               | C15orf55        |     |                                 | 23476; MCAP; O60885; CAP; HUNKI; ENSG00000141867; BRD4                                  |
| <b>BRIP1</b> | BRCA1 interacting protein C-terminal helicase 1 | 83990 | 17 | 17q22   |     | yes |                                                                                                               | AML; leukaemia; breast                                 | Fanconi anaemia J; breast cancer susceptibility | L; E | Rec | F; N; Mis       |                 |     |                                 | 83990; MGC126521; OF; MGC126523; Q9BX63; FLJ90232; FANCI; BACH1; ENSG00000136492; BRIP1 |



|                 |                                                                   |        |    |          |     |     |                          |                              |  |   |     |              |            |  |  |                                                                                  |
|-----------------|-------------------------------------------------------------------|--------|----|----------|-----|-----|--------------------------|------------------------------|--|---|-----|--------------|------------|--|--|----------------------------------------------------------------------------------|
| <b>BTG1</b>     | B-cell translocation gene 1; anti-proliferative                   | 694    | 12 | 12q22    | yes |     | BCLL                     |                              |  | L | Dom | T            | MYC        |  |  | BTG1; P62324; ENSG00000133639; 694                                               |
| <b>BUB1B</b>    | BUB1 budding uninhibited by benzimidazoles 1 homolog beta (yeast) | 701    | 15 | 15q15    |     | yes | Rhabdomyosarcoma         | Mosaic variegated aneuploidy |  | M | Rec | Mis; N; F; S |            |  |  | BUB1B; Bub1A; hBUBR1; O60566; BUB1beta; SSK1; ENSG00000156970; 701; BUBR1; MAD3L |
| <b>C12orf9</b>  | Chromosome 12 open reading frame 9                                | 93669  | 12 | 12q14.3  | yes |     | Lipoma                   |                              |  | M | Dom | T            | LPP        |  |  |                                                                                  |
| <b>C15orf21</b> | Chromosome 15 open reading frame 21                               | 283651 | 15 | 15q21.1  | yes |     | Prostate                 |                              |  | E | Dom | T            | ETV1       |  |  |                                                                                  |
| <b>C15orf55</b> | Chromosome 15 open reading frame 55                               | 256646 | 15 | 15q14    | yes |     | Lethal midline carcinoma |                              |  | E | Dom | T            | BRD3; BRD4 |  |  | 256646; NUT; ENSG00000184507; NUT                                                |
| <b>C16orf75</b> | Chromosome 16 open reading frame 75                               | 116028 | 16 | 16p13.13 | yes |     | PMBL; Hodgkin lymphoma   |                              |  | L | Dom | T            | CIITA      |  |  | 116028; MGC24665; ENSG00000175643; C16orf75; C16orf75                            |
| <b>C2orf44</b>  | Chromosome 2 open reading frame 44                                | 80304  | 2  | 2p23.3   | yes |     | NSCLC                    |                              |  | E | Dom | T            | ALK        |  |  | FLJ21945; PP384; ENSG00000163026; C2orf44; 80304                                 |

|                |                                                              |        |    |                |     |  |                                            |  |  |   |     |         |       |     |                                                                               |                                                                        |
|----------------|--------------------------------------------------------------|--------|----|----------------|-----|--|--------------------------------------------|--|--|---|-----|---------|-------|-----|-------------------------------------------------------------------------------|------------------------------------------------------------------------|
| <b>CACNA1D</b> | Calcium channel; voltage-dependent; L type; alpha 1D subunit | 776    | 3  | p14.3          | yes |  | Adrenal aldosterone producing adenoma      |  |  | E | Dom | Mis     |       | yes | Syndrome featuring primary aldosteronism; seizures and neuromuscular disease. | CCHL1A2; CACNA1D; 776; ENSG00000157388; CACH3; CACN4; CACNL1A2; Cav1_3 |
| <b>CALR</b>    | Calreticulin                                                 | 811    | 19 | p13.3-p13.2    | yes |  | MPN; MDS                                   |  |  | L | Dom | F; Mis  |       |     |                                                                               | 811; ENSG00000179218; cC1qR; FLJ26680; RO; SSA; P27797; CALR           |
| <b>CAMTA1</b>  | Calmodulin binding transcription activator 1                 | 23261  | 1  | 1p36.31-p36.23 | yes |  | Epithelioid haemangioma                    |  |  | M | Dom | T       | WWTR1 |     |                                                                               | 23261; ENSG00000171735; KIAA0833; Q9Y6Y1; CAMTA1                       |
| <b>CANT1</b>   | Calcium activated nucleotidase 1                             | 124583 | 17 | 17q25          | yes |  | Prostate                                   |  |  | E | Dom | T       | ETV4  |     |                                                                               | 124583; SCAN-1; SHAPY; Q8WVQ1; ENSG00000171302; CANT1                  |
| <b>CARD11</b>  | Caspase recruitment domain family; member 11                 | 84433  | 7  | 7p22           | yes |  | DLBCL                                      |  |  | L | Dom | Mis     |       |     |                                                                               | CARD11; BIMP3; Q9BXL7; MGC133069; CARMA1; ENSG00000198286; 84433       |
| <b>CARS</b>    | Cysteinyln-trna synthetase                                   | 833    | 11 | 11p15.5        | yes |  | ALCL                                       |  |  | L | Dom | T       | ALK   |     |                                                                               | CARS; P49589; ENSG00000110619; 833                                     |
| <b>CASP8</b>   | Caspase 8; apoptosis-related cysteine peptidase              | 841    | 2  | q33-q34        | yes |  | Hepatocellular; oral squamous cell; breast |  |  | E | Rec | N; S; F |       |     |                                                                               | ALPS2B; FLICE; MCH5; MACH; CAP4; MGC78473; ENSG00000064012; 841; CASP8 |

|                |                                                                            |       |    |         |     |  |                      |  |  |   |          |                |               |  |  |                                                                                                                                     |
|----------------|----------------------------------------------------------------------------|-------|----|---------|-----|--|----------------------|--|--|---|----------|----------------|---------------|--|--|-------------------------------------------------------------------------------------------------------------------------------------|
| <b>CBFA2T1</b> | Core-binding factor; runt domain; a subunit 2;translocated to; 1 (ETO)     | 862   | 8  | 8q22    | yes |  | AML                  |  |  | L | Dom      | T              | MLL;<br>RUNX1 |  |  | RUNX1T1;<br>ENSG00000079102;<br>862                                                                                                 |
| <b>CBFA2T3</b> | Core-binding factor; runt domain; a subunit 2; translocated to; 3 (MTG-16) | 863   | 16 | 16q24   | yes |  | AML                  |  |  | L | Dom      | T              | RUNX1         |  |  | CBFA2T3; MTG16;<br>ETO2; MTGR2;<br>ZMYND4;<br>ENSG00000129993;<br>863                                                               |
| <b>CBFB</b>    | Core-binding factor; beta subunit                                          | 865   | 16 | 16q22   | yes |  | AML                  |  |  | L | Dom      | T              | MYH11         |  |  | 865; PEBP2B; Q13951;<br>ENSG00000067955;<br>CBFB                                                                                    |
| <b>CBL</b>     | Cas-Br-M (murine) ecotropic retroviral transforming                        | 867   | 11 | 11q23.3 | yes |  | AML;<br>JMML;<br>MDS |  |  | L | Dom; Rec | T; Mis S;<br>O | MLL           |  |  | CBL; RNF55; CBL2; C-<br>CBL;<br>ENSG00000110395;<br>867                                                                             |
| <b>CBLB</b>    | Cas-Br-M (murine) ecotropic retroviral transforming sequence b             | 868   | 3  | 3q13.11 | yes |  | AML                  |  |  | L | Rec      | Mis S          |               |  |  | Nbla00127;<br>DKFZp686J10223;<br>DKFZp779A0729;<br>DKFZp779F1443;<br>FLJ36865; FLJ41152;<br>RNF56;<br>ENSG00000114423;<br>868; CBLB |
| <b>CBLC</b>    | Cas-Br-M (murine) ecotropic retroviral transforming sequence c             | 23624 | 19 | 19q13.2 | yes |  | AML                  |  |  | L | Rec      | M              |               |  |  | 23624; CBL-3; CBL-<br>SL; Q9ULV8;<br>ENSG00000142273;<br>CBLC; RNF57                                                                |
| <b>CCDC6</b>   | Coiled-coil domain containing 6                                            | 8030  | 10 | 10q21   | yes |  | NSCLC                |  |  | E | Dom      | T              | RET           |  |  | 8030; D10S170; PTC;<br>TST1; H4; TPC;<br>Q16204;<br>ENSG00000108091;<br>CCDC6                                                       |

|                 |                                                              |       |    |         |     |  |                        |  |  |      |     |   |             |  |                                                                                                                     |
|-----------------|--------------------------------------------------------------|-------|----|---------|-----|--|------------------------|--|--|------|-----|---|-------------|--|---------------------------------------------------------------------------------------------------------------------|
| <b>CCNB1IP1</b> | Cyclin B1 interacting protein 1; E3 ubiquitin protein ligase | 57820 | 14 | 14q11.2 | yes |  | Leiomyoma              |  |  | M    | Dom | T | HMGA2       |  | 57820; C14orf18; HEI10; Q9NPC3; ENSG00000100814; CCNB1IP1                                                           |
| <b>CCND1</b>    | Cyclin D <sub>1</sub>                                        | 595   | 11 | 11q13   | yes |  | CLL; B-ALL; breast     |  |  | L; E | Dom | T | IGH@; FSTL3 |  | D11S287E; BCL1; U21B31; PRAD1; ENSG00000110092; 595; CCND1                                                          |
| <b>CCND2</b>    | Cyclin D <sub>2</sub>                                        | 894   | 12 | 12p13   | yes |  | NHL; CLL               |  |  | L    | Dom | T | IGL@        |  | P30279; KIAK0002; MGC102758; CCND2; ENSG00000118971; 894                                                            |
| <b>CCND3</b>    | Cyclin D <sub>3</sub>                                        | 896   | 6  | 6p21    | yes |  | MM                     |  |  | L    | Dom | T | IGH@        |  | CCND3; P30281; ENSG00000112576; 896                                                                                 |
| <b>CCNE1</b>    | Cyclin E <sub>1+B89</sub>                                    | 898   | 19 | 19q12   | yes |  | Serous ovarian         |  |  | E    | Dom | A |             |  | 898; CCNE; P24864; ENSG00000105173; CCNE1                                                                           |
| <b>CD273</b>    | Programmed cell death 1 ligand 2                             | 80380 | 9  | 9p24.2  | yes |  | PMBL; Hodgkin lymphoma |  |  | L    | Dom | T | CIITA       |  | bA574F11_2; Q9BQ51; PDL2; PD-L2; MGC142238; CD273; PDCD1L2; Btdc; MGC142240; ENSG00000197646; 80380; PDCD1LG2; B7DC |
| <b>CD274</b>    | CD274 molecule                                               | 29126 | 9  | 9p24    | yes |  | PMBL; Hodgkin lymphoma |  |  | L    | Dom | T | CIITA       |  | CD274; PDL1; B7-H; Q9NZQ7; B7H1; MGC142294; PDCD1LG1; MGC142296; PD-L1; PDCD1L1; ENSG00000120217; 29126             |

|              |                                                                           |       |    |          |     |     |                         |                                                     |                                         |      |     |              |      |                    |                                                                                                |
|--------------|---------------------------------------------------------------------------|-------|----|----------|-----|-----|-------------------------|-----------------------------------------------------|-----------------------------------------|------|-----|--------------|------|--------------------|------------------------------------------------------------------------------------------------|
| <b>CD74</b>  | CD74 molecule; major histocompatibility complex; class II invariant chain | 972   | 5  | 5q32     | yes |     | NSCLC                   |                                                     |                                         | E    | Dom | T            | ROS1 |                    | 972;<br>ENSG00000019582;<br>DHLA3; HLADG; Ia-GAMMA; protein 41;<br>CD74                        |
| <b>CD79A</b> | CD79a molecule; immunoglobulin-associated alpha                           | 973   | 19 | 19q13.2  | yes |     | DLBCL; WM               |                                                     |                                         | L    | Dom | S            |      | agammaglobulinemia | 973;<br>ENSG00000105369;<br>IGA; MB-1; P11912;<br>CD79A                                        |
| <b>CD79B</b> | CD79b molecule; immunoglobulin-associated beta                            | 974   | 17 | 17q23    | yes |     | DLBCL; WM               |                                                     |                                         | L    | Dom | Mis; S       |      | agammaglobulinemia | 974;<br>ENSG00000007312;<br>B29; IGB; P40259;<br>CD79B                                         |
| <b>CDC73</b> | Cell division cycle 73                                                    | 79577 | 1  | 1q21-q31 | yes | yes | Parathyroid adenoma     | Parathyroid adenoma; multiple ossifying jaw fibroma | Hyperparathyroidism-jaw tumour syndrome | E; M | Rec | Mis; N; F    |      |                    | 79577; HRPT2;<br>C1orf28; FLJ23316;<br>Q6P1J9; HPT-JT;<br>ENSG00000134371;<br>CDC73            |
| <b>CDH1</b>  | Cadherin 1; type 1; E-cadherin (epithelial) (ECAD)                        | 999   | 16 | 16q22.1  | yes | yes | Lobular breast; gastric | gastric                                             | Familial gastric carcinoma              | E    | Rec | Mis; N; F; S |      |                    | 999; uvomorulin;<br>ECAD; CD324; LCAM;<br>UVO; Arc-1; CDHE;<br>ENSG0000039068;<br>CDH1; P12830 |
| <b>CDH11</b> | Cadherin 11; type 2; OB-cadherin (osteoblast)                             | 1009  | 16 | 16q22.1  | yes |     | Aneurysmal bone cyst    |                                                     |                                         | M    | Dom | T            | USP6 |                    | 1009; OB; P55287;<br>CAD11;<br>ENSG00000140937;<br>CDH11                                       |
| <b>CDK12</b> | Cyclin-dependent kinase 12                                                | 51755 | 17 | 17q12    | yes |     | Serous ovarian          |                                                     |                                         | E    | Rec | Mis; N; F    |      |                    | CRKRS; KIAA0904;<br>Q9NYV4; CRKR;<br>CRK7;<br>ENSG00000167258;<br>CRKRS; 51755                 |

|                     |                                                                        |      |    |          |     |     |                                       |                      |                             |            |     |                 |        |  |                                                                                                                                             |
|---------------------|------------------------------------------------------------------------|------|----|----------|-----|-----|---------------------------------------|----------------------|-----------------------------|------------|-----|-----------------|--------|--|---------------------------------------------------------------------------------------------------------------------------------------------|
| <b>CDK4</b>         | Cyclin-dependent kinase 4                                              | 1019 | 12 | 12q14    |     | yes |                                       | Melanoma             | Familial malignant melanoma | E          | Dom | Mis             |        |  | MGC14458; PSK-J3; P11802; CMM3; ENSG00000135446; CDK4; 1019                                                                                 |
| <b>CDK6</b>         | Cyclin-dependent kinase 6                                              | 1021 | 7  | 7q21-q22 | yes |     | ALL                                   |                      |                             | L          | Dom | T               | MLLT10 |  | MGC59692; PLSTIRE; ENSG00000105810; Q00534; CDK6; 1021                                                                                      |
| <b>CDKN2A</b>       | Cyclin-dependent kinase inhibitor 2A (p16(INK4a)) gene                 | 1029 | 9  | 9p21     | yes | yes | Melanoma; multiple other tumour types | Melanoma; pancreatic | Familial malignant melanoma | L; E; M; O | Rec | D; Mis; N; F; S |        |  | p19; CDK4I; INK4; MLM; p16INK4; p14ARF; INK4a; p16INK4a; MTS1; p16; TP16; ARF; CMM2; p14; ENSG00000147889; P42771; 1029; CDKN2A; CDKN2      |
| <b>CDKN2a (p14)</b> | Cyclin-dependent kinase inhibitor 2A--p14arf protein                   | 1031 | 1  | 1p32     | yes |     | Glioma; MM                            |                      |                             | O; L       | Rec | D               |        |  | 1031; P42773; p18-INK4C; p18; INK4C; CDKN2C; ENSG00000123080                                                                                |
| <b>CDKN2C</b>       | Cyclin-dependent kinase inhibitor 2C (p18; inhibits CDK <sub>s</sub> ) | 1029 | 9  | 9p21     | yes | yes | Melanoma; multiple other tumour types | Melanoma; pancreatic | Familial malignant melanoma | L; E; M; O | Rec | D; S            |        |  | Q8N726; CDKN2a(p14); 1029; ENSG00000147889; ARF; CDK4I; CDKN2; CMM2; INK4; INK4a; MLM; MTS1; p14; p14ARF; p16; p16INK4; p16INK4a; p19; TP16 |
| <b>CDX2</b>         | Caudal type homeo box transcription factor 2                           | 1045 | 13 | 13q12.3  | yes |     | AML                                   |                      |                             | L          | Dom | T               | ETV6   |  | 1045; CDX3; Q99626; ENSG00000165556; CDX2                                                                                                   |

|               |                                                            |       |    |            |     |     |                                        |                        |  |   |     |           |                                                         |  |                                                                                                       |
|---------------|------------------------------------------------------------|-------|----|------------|-----|-----|----------------------------------------|------------------------|--|---|-----|-----------|---------------------------------------------------------|--|-------------------------------------------------------------------------------------------------------|
| <b>CEBPA</b>  | CCAAT/enhancer binding protein (C/EBP); alpha              | 1050  | 19 | 19q13.1    | yes |     | AML; MDS                               |                        |  | L | Dom | Mis; N; F |                                                         |  | CEBPA; CEBP; P49715; C/EBP-alpha; 1050                                                                |
| <b>CEP1</b>   | Centrosomal protein 1                                      | 11064 | 9  | 9q33       | yes |     | MPN; NHL                               |                        |  | L | Dom | T         | FGFR1                                                   |  | CEP110; CEP1; ENSG00000119397; 11064; CEP110                                                          |
| <b>CHCHD7</b> | Coiled-coil-helix-coiled-coil-helix domain containing 7    | 79145 | 8  | 8q11.2     | yes |     | salivary gland adenoma                 |                        |  | E | Dom | T         | PLAG1                                                   |  | 79145; ENSG00000170791; FLJ40966; MGC2217; Q9BUK0; CHCHD7                                             |
| <b>CHEK2</b>  | CHK2 checkpoint homolog (S. Pombe)                         | 11200 | 22 | 22q12.1    |     | yes | Breast                                 | Familial breast cancer |  | E | Rec | F         |                                                         |  | HuCds1; bA444G7; CDS1; CHK2; LFS2; PP1425; RP11-436C9_1; RAD53; O96017; ENSG00000183765; 11200; CHEK2 |
| <b>CHIC2</b>  | Cysteine-rich hydrophobic domain 2                         | 26511 | 4  | 4q11-q12   | yes |     | AML                                    |                        |  | L | Dom | T         | ETV6                                                    |  | 26511; BTL; Q9UKJ5; CHIC2                                                                             |
| <b>CHN1</b>   | Chimerin (chimaerin) 1                                     | 1123  | 2  | 2q31-q32.1 | yes |     | Extraskeletal myxoid chondrosarcoma    |                        |  | M | Dom | T         | TAF15                                                   |  | CHN1; ARHGAP2; RHOGAP2; n-chimerin; CHN; RhoGAP2; ENSG00000128656; 1123                               |
| <b>CIC</b>    | Capicua homolog                                            | 23152 | 19 | 19q13.2    | yes |     | Oligodendroglioma; soft tissue sarcoma |                        |  | O | Rec |           |                                                         |  |                                                                                                       |
| <b>CIITA</b>  | Class II; major histocompatibility complex; transactivator | 4261  | 16 | 16p13      | yes |     | PMBL; Hodgkin lymphoma                 |                        |  | L | Dom | T         | FLJ27352; CD274; CD273; RALGDS; RUNDC2A; C16orf75; BCL6 |  | 4261; P33076; C2TA; MHC2TA; ENSG00000179583; CIITA                                                    |

|               |                                              |       |    |              |     |  |                                                       |  |  |      |     |           |             |     |                         |                                                                                                        |
|---------------|----------------------------------------------|-------|----|--------------|-----|--|-------------------------------------------------------|--|--|------|-----|-----------|-------------|-----|-------------------------|--------------------------------------------------------------------------------------------------------|
| <b>CLTC</b>   | Clathrin; heavy polypeptide (Hc)             | 1213  | 17 | 17q11-pter   | yes |  | ALCL; renal                                           |  |  | L    | Dom | T         | ALK; TFE3   |     |                         | Q00610; CLTCL2; ENSG00000141367; 1213; CLTC                                                            |
| <b>CLTCL1</b> | Clathrin; heavy polypeptide-like 1           | 8218  | 22 | 22q11.21     | yes |  | ALCL                                                  |  |  | L    | Dom | T         | ?           |     |                         | 8218; CLTCL; P53675; ENSG00000070371; CLTCL1                                                           |
| <b>CMKOR1</b> | Chemokine orphan receptor 1                  | 57007 | 2  | 2q37.3       | yes |  | Lipoma                                                |  |  | M    | Dom | T         | HMGA2       |     |                         | CMKOR1; GPR159; P25106; RDC1; ENSG00000144476; 57007; CXCR7                                            |
| <b>CNOT3</b>  | CCR4-NOT transcription complex subunit 3     | 4849  | 19 | 19q13.4      | yes |  | T-ALL                                                 |  |  | L    | Rec | Mis; N; F |             |     |                         | 4849; KIAA0691; LENG2; NOT3; NOT3H; O75175; ENSG00000088038; CNOT3                                     |
| <b>COL1A1</b> | Collagen; type I; alpha 1                    | 1277  | 17 | 17q21.31-q22 | yes |  | Dermatofibrosarcoma protuberans; aneurysmal bone cyst |  |  | M    | Dom | T         | PDGFB; USP6 | yes | Osteogenesis imperfecta | COL1A1; P02452; OI4; ENSG00000108821; 1277                                                             |
| <b>COPEB</b>  | Core promoter element binding protein (KLF6) | 1316  | 10 | 10p15        | yes |  | Prostate; glioma                                      |  |  | E; O | Rec | Mis; N    |             |     |                         | DKFZp686N0199; RP11-184A2_1; BCD1; GBF; PAC1; ZF9; COPEB; ZF9; CPBP; ST12; ENSG00000067082; 1316; KLF6 |
| <b>COX6C</b>  | Cytochrome c oxidase subunit vic             | 1345  | 8  | 8q22-q23     | yes |  | Uterine leiomyoma                                     |  |  | M    | Dom | T         | HMGA2       |     |                         | COX6C; P09669; ENSG00000164919; 1345                                                                   |
| <b>CREB1</b>  | Camp responsive element binding protein 1    | 1385  | 2  | 2q34         | yes |  | Clear cell sarcoma; angiomatoid fibrous histiocytoma  |  |  | M    | Dom | T         | EWSR1       |     |                         | CREB1; ENSG00000118260; 1385                                                                           |



|                |                                                    |       |      |                |     |  |                                                                                             |  |  |         |         |                 |                    |     |                           |                                                                            |
|----------------|----------------------------------------------------|-------|------|----------------|-----|--|---------------------------------------------------------------------------------------------|--|--|---------|---------|-----------------|--------------------|-----|---------------------------|----------------------------------------------------------------------------|
| <b>CREB3L1</b> | Camp responsive element binding protein 3-like 1   | 90993 | 11   | 11p11.2        | yes |  | Myxofibrosarcoma                                                                            |  |  | M       | Dom     | T               | FUS                |     |                           | 90993; CREB3L1; ENSG00000157613; OASIS; Q96BA8                             |
| <b>CREB3L2</b> | Camp responsive element binding protein 3-like 2   | 64764 | 7    | 7q34           | yes |  | Fibromyxoid sarcoma                                                                         |  |  | M       | Dom     | T               | FUS                |     |                           | MGC131709; MGC71006; BBF2H7; TCAG_1951439; ENSG00000182158; CREB3L2; 64764 |
| <b>CREBBP</b>  | CREB binding protein (CBP)                         | 1387  | 16   | 16p13.3        | yes |  | ALL; AML; DLBCL; B-NHL                                                                      |  |  | L       | Dom/Rec | T; N; F; Mis; O | MLL; MORF; RUNXBP2 | yes | Rubinstein-Taybi syndrome | 1387; CBP; RTS; RSTS; ENSG0000005339; CREBBP                               |
| <b>CRLF2</b>   | Cytokine receptor-like factor 2                    | 64109 | X; Y | Xp22.3; Yp11.3 | yes |  | B-ALL; Downs associated ALL                                                                 |  |  | L       | Dom     | Mis; T          | P2RY8; IGH@        |     |                           | CRLF2; ENSG00000205755                                                     |
| <b>CRTC3</b>   | CREB regulated transcription coactivator 3         | 64784 | 15   | 15q26.1        | yes |  | Salivary gland mucoepidermoid                                                               |  |  | E       | Dom     | T               | MAML2              |     |                           | 64784; FLJ21868; TORC3; ENSG00000140577; CRTC3                             |
| <b>CSF3R</b>   | Colony stimulating factor 3 receptor (granulocyte) | 1441  | 1    | 1p35-p34.3     | yes |  | aCML; chronic neutrophilic leukaemia                                                        |  |  | L       |         |                 |                    |     |                           | 1441; CD114; GCSFR; ENSG00000119535; CSF3R                                 |
| <b>CTNNB1</b>  | Catenin (cadherin-associated protein); $\beta$ 1   | 1499  | 3    | 3p22-p21.3     | yes |  | Colorectal; ovarian; hepatoblastoma; pleomorphic salivary gland adenoma; other tumour types |  |  | E; M; O | Dom     | H; Mis; T       | PLAG1              |     |                           | P35222; CTNNB; ENSG00000168036; 1499; CTNNB1                               |

|                |                                                           |      |    |               |     |     |                                                           |                                               |                           |   |     |              |             |  |                                                                                                    |
|----------------|-----------------------------------------------------------|------|----|---------------|-----|-----|-----------------------------------------------------------|-----------------------------------------------|---------------------------|---|-----|--------------|-------------|--|----------------------------------------------------------------------------------------------------|
| <b>CYLD</b>    | Familial cylindromatosis gene                             | 1540 | 16 | 16q12-q13     | yes | yes | Cylindroma                                                | Cylindroma                                    | Familial cylindromatosis  | E | Rec | Mis; N; F; S |             |  | 1540; CYLD1; FLJ20180; EAC; FLJ31664; HSPC057; CDMT; CYLDI; KIAA0849; USPL2; ENSG00000083799; CYLD |
| <b>D10S170</b> | DNA segment on chromosome 10 (unique) 170; H4 gene (PTC1) | 8030 | 10 | 10q21         | yes |     | Papillary thyroid; CML                                    |                                               |                           | E | Dom | T            | RET; PDGFRB |  |                                                                                                    |
| <b>DAXX</b>    | Death-domain associated protein                           | 1616 | 6  | 6p21.3        | yes |     | Pancreatic neuroendocrine tumour; paediatric glioblastoma |                                               |                           | E | Rec | Mis; F; N    |             |  | MGC126246; BING2; DAP6; DAQB-126H3_2; MGC126245; Q9UER7; ENSG00000206206; 1616; DAXX               |
| <b>DDB2</b>    | Damage-specific DNA binding protein 2                     | 1643 | 11 | 11p12         |     | yes |                                                           | Skin basal cell; skin squamous cell; melanoma | Xeroderma pigmentosum (E) | E | Rec | Mis; N       |             |  | DDB2; Q92466; FLJ34321; ENSG00000134574; 1643                                                      |
| <b>DDIT3</b>   | DNA-damage-inducible transcript 3                         | 1649 | 12 | 12q13.1-q13.2 | yes |     | Liposarcoma                                               |                                               |                           | M | Dom | T            | FUS         |  | DDIT3; CEBPZ; CHOP; P35638; CHOP10; GADD153; MGC4154; _C/EBP zeta_; ENSG00000175197; 1649          |
| <b>DDX10</b>   | DEAD (Asp-Glu-Ala-Asp) box polypeptide 10                 | 1662 | 11 | 11q22-q23     | yes |     | AML*                                                      |                                               |                           | L | Dom | T            | NUP98       |  | 1662; HRH-J8; Q13206; ENSG00000178105; DDX10                                                       |

|               |                                             |       |    |          |     |     |                                                           |                          |                                   |         |     |                      |        |  |                                                                               |
|---------------|---------------------------------------------|-------|----|----------|-----|-----|-----------------------------------------------------------|--------------------------|-----------------------------------|---------|-----|----------------------|--------|--|-------------------------------------------------------------------------------|
| <b>DDX5</b>   | DEAD (Asp-Glu-Ala-Asp) box polypeptide 5    | 1655  | 17 | 17q21    | yes |     | Prostate                                                  |                          |                                   | E       | Dom | T                    | ETV4   |  | 1655; HLR1; HUMP68; G17P1; p68; DKFZp686J01190; P17844; ENSG00000108654; DDX5 |
| <b>DDX6</b>   | DEAD (Asp-Glu-Ala-Asp) box polypeptide 6    | 1656  | 11 | 11q23.3  | yes |     | B-NHL                                                     |                          |                                   | L       | Dom | T                    | IGH@   |  | 1656; P54; FLJ36338; RCK; P26196; HLR2; ENSG00000110367; DDX6                 |
| <b>DEK</b>    | DEK oncogene (DNA binding)                  | 7913  | 6  | 6p23     | yes |     | AML                                                       |                          |                                   | L       | Dom | T                    | NUP214 |  | 7913; D6S231E; P35659; ENSG00000124795; DEK                                   |
| <b>DICER1</b> | Dicer 1; ribonuclease type III              | 23405 | 14 | 14q32.13 | yes | yes | Sex cord-stromal tumour; TGCT; embryonal rhabdomyosarcoma | Pleuropulmonary blastoma | Familial pleuropulmonary blastoma | E; M; O | Rec | Mis F; N             |        |  | 23405; Dicer; Q9UPY3; K12H4_8-LIKE; HERNA; KIAA0928; ENSG00000100697; DICER1  |
| <b>DNM2</b>   | Dynamamin 2                                 | 1785  | 19 | 19p13.2  | yes |     | ETP ALL                                                   |                          |                                   | L       | Rec | F; N; Splice; Mis; O |        |  | 1785; CMTD11; CMTD1B; DYN2; DYN11; ENSG00000079805; DNM2                      |
| <b>DNMT3A</b> | DNA (cytosine-5-)-methyltransferase 3 alpha | 1788  | 2  | 2p23     | yes |     | AML                                                       |                          |                                   | L       | Rec | Mis; F; N; S         |        |  | DNMT3A; Q9Y6K1; M_HsaIIIa; DNMT3A2; 1788; ENSG00000119772                     |
| <b>DUX4</b>   | Double homeobox; 4                          | 22947 | 4  | 4q35     | yes |     | Soft tissue sarcoma                                       |                          |                                   | M       | Dom | T                    | CIC    |  | POCJ90; DUX4; POCJ85; POCJ86; POCJ88; POCJ89                                  |
| <b>EBF1</b>   | Early B-cell factor 1                       | 1879  | 5  | 5q34     | yes |     | Lipoma                                                    |                          |                                   | M       | Dom | T                    | HMGA2  |  | 1879; COE1; EBF; O/E-1; OLF1; Q9UH73; ENSG00000164330; EBF1                   |

|               |                                                                                                    |        |    |              |     |     |                   |       |                      |      |     |                      |         |  |                                                                                         |
|---------------|----------------------------------------------------------------------------------------------------|--------|----|--------------|-----|-----|-------------------|-------|----------------------|------|-----|----------------------|---------|--|-----------------------------------------------------------------------------------------|
| <b>ECT2L</b>  | Epithelial cell transforming sequence 2 oncogene-like                                              | 345930 | 6  | 6q24.1       | yes |     | ETP ALL           |       |                      | L    | Rec | N;<br>Splice;<br>Mis |         |  | 345930; C6orf91; ENSG00000203734; dJ509I19_2; dJ509I19_3; Q008S8; C6orf91; LFDH         |
| <b>EGFR</b>   | Epidermal growth factor receptor (erythroblastic leukemia viral (v-erb-b) oncogene homolog; avian) | 1956   | 7  | 7p12.3-p12.1 | yes | yes | Glioma; NSCLC     | NSCLC | Familial lung cancer | E; O | Dom | A; O;<br>Mis         |         |  | EGFR; mENA; ERBB; ERBB1; ENSG00000146648; P00533; 1956                                  |
| <b>EIF4A2</b> | Eukaryotic translation initiation factor 4A; isoform 2                                             | 1974   | 3  | 3q27.3       | yes |     | NHL               |       |                      | L    | Dom | T                    | BCL6    |  | 1974; DDX2B; EIF4A; BM-010; EIF4F; ENSG00000156976; EIF4A2                              |
| <b>ELF4</b>   | E74-like factor 4 (ets domain transcription factor)                                                | 2000   | X  | Xq26         | yes |     | AML               |       |                      | L    | Dom | T                    | ERG     |  | 2000; MEF; Q99607; RP3-510O21_2; ELFR; ENSG00000102034; ELF4                            |
| <b>ELK4</b>   | ELK4; ETS-domain protein (SRF accessory protein 1)                                                 | 2005   | 1  | 1q32         | yes |     | prostate          |       |                      | E    | Dom | T                    | SLC45A3 |  | 2005; SAP1; P28324; ENSG00000158711; ELK4                                               |
| <b>ELKS</b>   | ELKS protein                                                                                       | 23085  | 12 | 12p13.3      | yes |     | Papillary thyroid |       |                      | E    | Dom | T                    | RET     |  | ERC1; KIAA108; Q8IUD2; Cast2; KIAA1081; RAB6IP2; MGC12974; ENSG00000082805; 23085; ELKS |
| <b>ELL</b>    | ELL gene (11-19 lysine-rich leukemia gene)                                                         | 8178   | 19 | 19p13.1      | yes |     | AL                |       |                      | L    | Dom | T                    | MLL     |  | ELL; P55199; Men; C19orf17; ELL1; ENSG00000105656; 8178                                 |

|              |                                                                                                                |       |    |         |     |  |                                                     |  |  |      |     |                 |              |     |                                                                     |                                                                                                 |
|--------------|----------------------------------------------------------------------------------------------------------------|-------|----|---------|-----|--|-----------------------------------------------------|--|--|------|-----|-----------------|--------------|-----|---------------------------------------------------------------------|-------------------------------------------------------------------------------------------------|
| <b>ELN</b>   | Elastin                                                                                                        | 2006  | 7  | 7q11.23 | yes |  | B-ALL                                               |  |  | L    | Dom | T               | PAX5         | yes | Supravalvular Aortic Stenosis; Cutis laxa; Williams-Beuren Syndrome | 2006; ENSG00000049540; FLJ38671; FLJ43523; SVAS; WBS; WS; ELN                                   |
| <b>EML4</b>  | Echinoderm microtubule associated protein like 4                                                               | 27436 | 2  | 2p21    | yes |  | NSCLC                                               |  |  | E    | Dom | T               | ALK          |     |                                                                     | EML4; ENSG00000143924; 27436                                                                    |
| <b>EP300</b> | 300 kDa E1A-Binding protein gene                                                                               | 2033  | 22 | 22q13   | yes |  | Colorectal; breast; pancreatic; AML; ALL; DLBCL     |  |  | L; E | Rec | T; N; F; Mis; O | MLL; RUNXBP2 |     |                                                                     | 2033; ENSG00000100393; p300; RP1-85F18_1; EP300                                                 |
| <b>EPS15</b> | Epidermal growth factor receptor pathway substrate 15 (AF1p)                                                   | 2060  | 1  | 1p32    | yes |  | ALL                                                 |  |  | L    | Dom | T               | MLL          |     |                                                                     | AF-1P; AF1P; MLLT5; P42566; ENSG00000085832; EPS15; 2060                                        |
| <b>ERBB2</b> | V-erb-b2 erythroblastic leukemia viral oncogene homolog 2; neuro/glioblastoma derived oncogene homolog (avian) | 2064  | 17 | 17q21.1 | yes |  | Breast; ovarian; other tumour types; NSCLC; gastric |  |  | E    | Dom | A; Mis; O       |              |     |                                                                     | HER-2; c-erb B2; NEU; TKR1; NGL; HER2; HER-2/neu; c-erbB2; ENSG00000141736; P04626; 2064; ERBB2 |

|              |                                                                                                                                     |      |    |                |  |     |  |                                               |                           |   |     |              |  |  |  |                                                                                                         |
|--------------|-------------------------------------------------------------------------------------------------------------------------------------|------|----|----------------|--|-----|--|-----------------------------------------------|---------------------------|---|-----|--------------|--|--|--|---------------------------------------------------------------------------------------------------------|
| <b>ERCC2</b> | Excision repair cross-complementing rodent repair deficiency; complementation group 2 (xeroderma pigmentosum D)                     | 2068 | 19 | 19q13.2-q13.3  |  | yes |  | Skin basal cell; skin squamous cell; melanoma | Xeroderma pigmentosum (D) | E | Rec | Mis; N; F; S |  |  |  | <p>XPB; TTD; MGC126218; MGC126219; P18074; MAG; COFS2; ENSG00000104884; ERCC2; 2068; MGC102762; EM9</p> |
| <b>ERCC3</b> | Excision repair cross-complementing rodent repair deficiency; complementation group 3 (xeroderma pigmentosum group B complementing) | 2071 | 2  | 2q21           |  | yes |  | Skin basal cell; skin squamous cell; melanoma | Xeroderma pigmentosum (B) | E | Rec | Mis; S       |  |  |  | <p>2071; RAD25; XPB; BTF2; P19447; TFIIF; GTF2H; ENSG00000163161; ERCC3</p>                             |
| <b>ERCC4</b> | Excision repair cross-complementing rodent repair deficiency; complementation group 4                                               | 2072 | 16 | 16p13.3-p13.13 |  | yes |  | Skin basal cell; skin squamous cell; melanoma | Xeroderma pigmentosum (F) | E | Rec | Mis; N; F    |  |  |  | <p>Q92889; XPF; RAD1; ENSG00000175595; 2072; ERCC4</p>                                                  |

|              |                                                                                                                                                            |      |    |         |     |  |                                               |                           |         |     |           |                                                     |  |                                                                                  |
|--------------|------------------------------------------------------------------------------------------------------------------------------------------------------------|------|----|---------|-----|--|-----------------------------------------------|---------------------------|---------|-----|-----------|-----------------------------------------------------|--|----------------------------------------------------------------------------------|
| <b>ERCC5</b> | Excision repair cross-complementing rodent repair deficiency; complementation group 5 (xeroderma pigmentosum; complementation group G (Cockayne syndrome)) | 2073 | 13 | 13q33   | yes |  | Skin basal cell; skin squamous cell; melanoma | Xeroderma pigmentosum (G) | E       | Rec | Mis; N; F |                                                     |  | 2073; XPGC; ERCM2; UVDR; XPG; COFS3; RP11-48416_5; ENSG00000134899; ERCC5        |
| <b>ERG</b>   | V-ets erythroblastosis virus E26 oncogene like (avian)                                                                                                     | 2078 | 21 | 21q22.3 | yes |  | Ewing sarcoma; prostate; AML                  |                           | M; E; L | Dom | T         | EWSR1; TMPRSS2; ELF4; FUS; HERPUD1; NDRG1           |  | ERG; P11308; 2078                                                                |
| <b>ETV1</b>  | Ets variant gene 1                                                                                                                                         | 2115 | 7  | 7p22    | yes |  | Ewing sarcoma; prostate                       |                           | M; E    | Dom | T         | EWSR1; TMPRSS2; SLC45A3; C15orf21; HNRNPA2B1. ACSL3 |  | ETV1; DKFZp781L0674; MGC120534; MGC104699; MGC120533; ER81; ENSG0000006468; 2115 |
| <b>ETV4</b>  | Ets variant gene 4 (E1A enhancer binding protein; E1AF)                                                                                                    | 2118 | 17 | 17q21   | yes |  | Ewing sarcoma; prostate carcinoma             |                           | M; E    | Dom | T         | EWSR1; TMPRSS2; DDX5; KLK2; CANT1                   |  | 2118; PEA3; PEAS3; E1A-F; E1AF; ENSG00000175832; ETV4                            |
| <b>ETV5</b>  | Ets variant gene 5                                                                                                                                         | 2119 | 3  | 3q28    | yes |  | Prostate                                      |                           | E       | Dom | T         | TMPRSS2; SCL45A3                                    |  | 2119; P41161; ERM; ENSG00000244405; ETV5                                         |

|              |                                         |      |    |                 |     |     |                                                                                                       |                         |                           |         |     |              |                                                                                                                            |  |  |                                                             |
|--------------|-----------------------------------------|------|----|-----------------|-----|-----|-------------------------------------------------------------------------------------------------------|-------------------------|---------------------------|---------|-----|--------------|----------------------------------------------------------------------------------------------------------------------------|--|--|-------------------------------------------------------------|
| <b>ETV6</b>  | Ets variant gene 6 (TEL oncogene)       | 2120 | 12 | 12p13           | yes |     | Congenital fibrosarcoma; multiple leukaemia and lymphoma; secretory breast; MDS; ALL                  |                         |                           | L; E; M | Dom | T            | NTRK3; RUNX1; PDGFRB; ABL1; MN1; ABL2; FACL6; CHIC2; ARNT; JAK2; EVI1; CDX2; STL; HLXB9; MDS2; PER1; SYK; TTL; FGFR3; PAX5 |  |  | P41212; TEL/ABL; TEL; ETV6; ENSG00000139083; 2120           |
| <b>EVI1</b>  | Ecotropic viral integration site 1      | 2122 | 3  | 3q26            | yes |     | AML; CML                                                                                              |                         |                           | L       | Dom | T            | RUNX1; ETV6; PRDM16; RPN1                                                                                                  |  |  | EVI1; MDS1-EVI1; PRDM3; Q03112; ENSG00000085276; 2122; EVI1 |
| <b>EWSR1</b> | Ewing sarcoma breakpoint region 1 (EWS) | 2130 | 22 | 22q12           | yes |     | Ewing sarcoma; desmoplastic small round cell tumour; ALL; clear cell sarcoma; sarcoma; myoepithelioma |                         |                           | L; M    | Dom | T            | FLI1; ERG; ZNF278; NR4A3; FEV; ATF1; ETV1; ETV4; WT1; ZNF384; CREB1; POU5F1; PBX1                                          |  |  | 2130; EWS; ENSG00000182944; EWSR1                           |
| <b>EXT1</b>  | Multiple exostoses type 1 gene          | 2131 | 8  | 8q24.1-1-q24.13 |     | yes |                                                                                                       | Exostoses; osteosarcoma | Multiple exostoses type 1 | M       | Rec | Mis; N; F; S |                                                                                                                            |  |  | 2131; ttv; Q16394; EXT; ENSG00000182197; EXT1               |
| <b>EXT2</b>  | Multiple exostoses type 2 gene          | 2132 | 11 | 11p12-p11       |     | yes |                                                                                                       | Exostoses; osteosarcoma | Multiple exostoses type 2 | M       | Rec | Mis; N; F; S |                                                                                                                            |  |  | ENSG00000151348; Q93063; SOTV; 2132; EXT2                   |



|               |                                              |       |    |          |     |     |                |                    |  |   |      |                 |      |  |                                                                                           |
|---------------|----------------------------------------------|-------|----|----------|-----|-----|----------------|--------------------|--|---|------|-----------------|------|--|-------------------------------------------------------------------------------------------|
| <b>EZH2</b>   | Enhancer of zeste homolog 2                  | 2146  | 7  | 7q35-q36 | yes |     | DLBCL          |                    |  | L | Rec? | Mis             |      |  | EZH1; ENX-1; MGC9169; Q15910; ENSG00000106462; EZH2; 2146                                 |
| <b>EZR</b>    | Ezrin                                        | 7430  | 6  | 6q25.3   | yes |     | NSCLC          |                    |  | E | Dom  | T               | ROS1 |  | 7430; ENSG0000092820; CVL; DKFZp762H157; MGC1584; P15311; CVIL; FLJ26216; EZR             |
| <b>FACL6</b>  | Fatty-acid-coenzyme A ligase; long-chain 6   | 23305 | 5  | 5q31     | yes |     | AML; AEL       |                    |  | L | Dom  | T               | ETV6 |  | 23305; FACL6; LACS2; ACS2; LACS5; KIAA0837; ENSG00000164398; ACSL6                        |
| <b>FAM46C</b> | Family with sequence similarity 46; member C | 54855 | 1  | 1p12     | yes |     | MM             |                    |  | L | Rec  | Mis; F; O       |      |  | Q5VWP2; FAM46C; 54855; ENSG00000183508; FLJ20202                                          |
| <b>FANCA</b>  | Fanconi anemia; complementation group A      | 2175  | 16 | 16q24.3  |     | yes | AML; leukaemia | Fanconi anaemia A  |  | L | Rec  | D; Mis; N; F; S |      |  | FA1; MGC75158; FANCH; FAH; FA; FA-H; ENSG00000187741; 2175; FANCA; FAA; FACA              |
| <b>FANCC</b>  | Fanconi anemia; complementation group C      | 2176  | 9  | 9q22.3   |     | yes | AML; leukaemia | Fanconi anaemia C  |  | L | Rec  | D; Mis; N; F; S |      |  | FAC; ENSG00000158169; FLJ14675; FACC; FA3; RP11-80I15_2; 2176; FANCC                      |
| <b>FANCD2</b> | Fanconi anemia; complementation group D2     | 2177  | 3  | 3p26     |     | yes | AML; leukaemia | Fanconi anaemia D2 |  | L | Rec  | D; Mis; N; F    |      |  | FACD; FANCD; DKFZp762A223; FAD2; FA4; FLJ23826; ENSG00000144554; FANCD2; 2177; FAD; FA-D2 |
| <b>FANCE</b>  | Fanconi anemia; complementation group E      | 2178  | 6  | 6p21-p22 |     | yes | AML; leukaemia | Fanconi anaemia E  |  | L | Rec  | N; F; S         |      |  | FANCE; FACE; FAE; ENSG00000112039; 2178                                                   |

|               |                                                                    |       |    |         |     |     |                                                                           |                |                   |         |     |              |            |                                         |  |                                                                                                       |
|---------------|--------------------------------------------------------------------|-------|----|---------|-----|-----|---------------------------------------------------------------------------|----------------|-------------------|---------|-----|--------------|------------|-----------------------------------------|--|-------------------------------------------------------------------------------------------------------|
| <b>FANCF</b>  | Fanconi anemia; complementation group F                            | 2188  | 11 | 11p15   |     | yes |                                                                           | AML; leukaemia | Fanconi anaemia F | L       | Rec | N; F         |            |                                         |  | FANCF; FAF; MGC126856; Q9NPI8; ENSG00000183161; 2188                                                  |
| <b>FANCG</b>  | Fanconi anemia; complementation group G                            | 2189  | 9  | 9p13    |     | yes |                                                                           | AML; leukaemia | Fanconi anaemia G | L       | Rec | Mis; N; F; S |            |                                         |  | FANCG; ENSG00000221829; FAG; XRCC9; O15287; 2189                                                      |
| <b>FAS</b>    | Fas cell surface death receptor                                    | 355   | 10 | 10q24.1 | yes |     | TGCT; nasal NK/T lymphoma; skin squamous cell carcinoma-burn scar related |                |                   | L; E; O | Rec | Mis          | yes        | Autoimmune lymphoproliferative syndrome |  | FAS; FAS1; APT1; TNFRSF6; ALPS1A; CD95; P25445; APO-1; FASTM; ENSG0000026103; 355                     |
| <b>FBXO11</b> | F-box protein 11                                                   | 80204 | 2  | 2p16.3  | yes |     | DLBCL                                                                     |                |                   | L       | Rec | Mis; F; D    |            |                                         |  | FBX11; MGC44383; FLJ12673; PRMT9; UG063H01; Q86XK2; ENSG00000138081; 80204; FBXO11; VIT1              |
| <b>FBXW7</b>  | F-box and WD-40 domain protein 7 (archipelago homolog; Drosophila) | 55294 | 4  | 4q31.3  | yes |     | Colorectal; endometrial; T-ALL                                            |                |                   | E; L    | Rec | Mis; N; D; F |            |                                         |  | DKFZp686F23254; AGO; FBX30; FBW7; SEL10; FBXW6; CDC4; SEL-10; FLJ11071; ENSG00000109670; 55294; FBXW7 |
| <b>FCGR2B</b> | Fc fragment of igg; low affinity iib; receptor for (CD32)          | 2213  | 1  | 1q23    | yes |     | ALL                                                                       |                |                   | L       | Dom | T            | ?          |                                         |  | CD32; FCGR2; IGFR2; CD32B; ENSG00000072694; FCGR2B; 2213; P31994; FCG2                                |
| <b>FEV</b>    | FEV protein - (HSRNAFEV)                                           | 54738 | 2  | 2q36    | yes |     | Ewing sarcoma                                                             |                |                   | M       | Dom | T            | EWSR1; FUS |                                         |  | 54738; Pet-1; HSRNAFEV; PET-1; ENSG00000163497; FEV                                                   |

|                |                                     |       |    |              |     |     |                                       |                       |                                                 |      |     |           |                        |     |                                            |                                                                                                              |
|----------------|-------------------------------------|-------|----|--------------|-----|-----|---------------------------------------|-----------------------|-------------------------------------------------|------|-----|-----------|------------------------|-----|--------------------------------------------|--------------------------------------------------------------------------------------------------------------|
| <b>FGFR1</b>   | Fibroblast growth factor receptor 1 | 2260  | 8  | 8p11.2-p11.1 | yes |     | MPN; NHL                              |                       |                                                 | L    | Dom | T         | BCR; FOP; ZNF198; CEP1 | yes | Pfeiffer syndrome; Kallman syndrome        | 2260; CEK; H4; N-SAM; BFGFR; H2; KAL2; H5; FGFR; FLG; HBGFR; H3; CD331; FLT2; P11362; ENSG00000077782; FGFR1 |
| <b>FGFR1OP</b> | FGFR1 oncogene partner (FOP)        | 11116 | 6  | 6q27         | yes |     | MPN; NHL                              |                       |                                                 | L    | Dom | T         | FGFR1                  |     |                                            | 11116; FOP; ENSG00000213066; FGFR1OP                                                                         |
| <b>FGFR2</b>   | Fibroblast growth factor receptor 2 | 2263  | 10 | 10q26        | yes |     | Gastric; NSCLC; endometrial           |                       |                                                 | E    | Dom | Mis       |                        | yes | Crouzon; Pfeiffer; and Apert syndromes     | 2263; BFR-1; KGFR; CFD1; K-SAM; CEK3; ECT1; TK25; JWS; CD332; BEK; TK14; ENSG00000066468; FGFR2              |
| <b>FGFR3</b>   | Fibroblast growth factor receptor 3 | 2261  | 4  | 4p16.3       | yes |     | Bladder; MM; T-cell lymphoma          |                       |                                                 | L; E | Dom | Mis; T    | IGH@; ETV6             | yes | Hypochondroplasia; Thanatophoric dysplasia | FGFR3; CD333; CEK2; HSFGR3EX; ACH; JTK4; P22607; ENSG00000068078; 2261                                       |
| <b>FH</b>      | Fumarate hydratase                  | 2271  | 1  | 1q42.1       |     | yes |                                       | Leiomyomatosis; renal | Hereditary leiomyomatosis and renal cell cancer | E; M | Rec | Mis; N; F |                        |     |                                            | 2271; HLRCC; P07954; LRCC; MCL; MCUL1; ENSG00000091483; FH                                                   |
| <b>FHIT</b>    | Fragile histidine triad gene        | 2272  | 3  | 3p14.2       | yes |     | Pleomorphic salivary gland adenoma    |                       |                                                 | E    | Dom | T         | HMGA2                  |     |                                            | P49789; FHIT; 2272; ENSG00000189283; AP3Aase; FRA3B                                                          |
| <b>FIP1L1</b>  | FIP1 like 1 (S. Cerevisiae)         | 81608 | 4  | 4q12         | yes |     | Idiopathic hypereosinophilic syndrome |                       |                                                 | L    | Dom | T         | PDGFRA                 |     |                                            | 81608; DKFZp586K0717; Q6UN15; ENSG00000145216; FIP1L1                                                        |

|                 |                                           |        |    |         |     |  |                                    |  |  |   |     |        |       |     |                                                                                                  |                                                                       |
|-----------------|-------------------------------------------|--------|----|---------|-----|--|------------------------------------|--|--|---|-----|--------|-------|-----|--------------------------------------------------------------------------------------------------|-----------------------------------------------------------------------|
| <b>FLI1</b>     | Friend leukemia virus integration 1       | 2313   | 11 | 11q24   | yes |  | Ewing sarcoma                      |  |  | M | Dom | T      | EWSR1 |     |                                                                                                  | FLI1; SIC-1; Q01543; EWSR2; ENSG00000151702; 2313                     |
| <b>FLJ27352</b> | BX648577; FLJ27352 hypothetical LOC145788 | 145788 | 15 | 15q21.3 | yes |  | PMBL; Hodgkin lymphoma             |  |  | L | Dom | T      | CIITA |     |                                                                                                  |                                                                       |
| <b>FLT3</b>     | Fms-related tyrosine kinase 3             | 2322   | 13 | 13q12   | yes |  | AML; ALL                           |  |  | L | Dom | Mis; O |       |     |                                                                                                  | 2322; STK1; RP11-153M24_3; CD135; FLK2; P36888; ENSG00000122025; FLT3 |
| <b>FBNP1</b>    | Formin binding protein 1 (FBP17)          | 23048  | 9  | 9q23    | yes |  | AML                                |  |  | L | Dom | T      | MLL   |     |                                                                                                  | SH2D3B; NSP2; KIAA0554; ENSG00000137936; BCAR3; 8412                  |
| <b>FOXA1</b>    | Forkhead box A1                           | 3169   | 14 | q12-q13 | yes |  | Breast; prostate                   |  |  | E | Dom | Mis; F |       |     |                                                                                                  | 3169; TCF3A; MGC33105; HNF3A; P55317; ENSG00000129514; FOXA1          |
| <b>FOXL2</b>    | Forkhead box L2                           | 668    | 3  | 3q23    | yes |  | Granulosa-cell tumour of the ovary |  |  | O | Dom | Mis    |       | yes | Blepharophimosis; ptosis and epicanthus inversus Types I; II; Premature ovarian failure type III | 668; BPES; BPES1; PINTO; POF3; PFRK; P58012; ENSG00000183770; FOXL2   |
| <b>FOXO1A</b>   | Forkhead box O1A (FKHR)                   | 2308   | 13 | 13q14.1 | yes |  | Alveolar rhabdomyosarcoma          |  |  | M | Dom | T      | PAX3  |     |                                                                                                  | Q12778; FOXO1; FKHR; FKH1; ENSG00000150907; FOXO1A; FOXO1A; 2308      |

|               |                                                     |       |    |         |     |  |                                                                                        |  |  |      |     |      |                                                     |  |                                                                                                                                          |
|---------------|-----------------------------------------------------|-------|----|---------|-----|--|----------------------------------------------------------------------------------------|--|--|------|-----|------|-----------------------------------------------------|--|------------------------------------------------------------------------------------------------------------------------------------------|
| <b>FOXO3A</b> | Forkhead box O3A                                    | 2309  | 6  | 6q21    | yes |  | AL                                                                                     |  |  | L    | Dom | T    | MLL                                                 |  | FOXO2;<br>DKFZp781A0677;<br>FKHRL1P2; AF6q21;<br>O43524; FOXO3A;<br>MGC12739;<br>MGC31925;<br>ENSG00000118689;<br>FOXO3; 2309;<br>FKHRL1 |
| <b>FOXP1</b>  | Forkhead box P1                                     | 27086 | 3  | 3p14.1  | yes |  | ALL                                                                                    |  |  | L    | Dom | T    | PAX5                                                |  | 27086; MGC12942;<br>MGC88572; HSPC215;<br>12CC4; QRF1;<br>FLJ23741; MGC99551;<br>hFKH1B;<br>ENSG00000114861;<br>FOXP1                    |
| <b>FSTL3</b>  | Follistatin-like 3 (secreted glycoprotein)          | 10272 | 19 | 19p13   | yes |  | B-CLL                                                                                  |  |  | L    | Dom | T    | CCND1                                               |  | 10272; FLRG; O95633;<br>ENSG0000070404;<br>FSTL3                                                                                         |
| <b>FUBP1</b>  | Far upstream element (FUSE) binding protein 1       | 8880  | 1  | 1p13.1  | yes |  | Oligodendro glioma                                                                     |  |  | O    | Rec | F; N |                                                     |  | FUBP; FBP;<br>ENSG00000162613;<br>8880; FUBP1                                                                                            |
| <b>FUS</b>    | Fusion; derived from t(12;16) malignant liposarcoma | 2521  | 16 | 16p11.2 | yes |  | Liposarcoma; AML; Ewing sarcoma; angiomatoid fibrous histiocytoma; fibromyxoid sarcoma |  |  | M; L | Dom | T    | DDIT3;<br>ERG; FEV;<br>ATF1;<br>CREB3L2;<br>CREB3L1 |  | 2521; TLS; P35637;<br>FUS1; CHOP; FUS-<br>CHOP; TLS/CHOP;<br>ENSG0000089280;<br>FUS                                                      |
| <b>FVT1</b>   | Follicular lymphoma variant translocation 1         | 2531  | 18 | 18q21.3 | yes |  | B-NHL                                                                                  |  |  | L    | Dom | T    | IGK@                                                |  | 2531; Q06136; FVT1;<br>ENSG00000119537;<br>FVT1                                                                                          |

|              |                                                                     |      |    |         |     |  |                                             |  |  |   |     |         |     |     |                                                                                                                                             |
|--------------|---------------------------------------------------------------------|------|----|---------|-----|--|---------------------------------------------|--|--|---|-----|---------|-----|-----|---------------------------------------------------------------------------------------------------------------------------------------------|
| <b>GAS7</b>  | Growth arrest-specific 7                                            | 8522 | 17 | 17p     | yes |  | AML*                                        |  |  | L | Dom | T       | MLL |     | 8522; KIAA0394; O60861; MLL/GAS7; MGC1348; ENSG0000007237; GAS7                                                                             |
| <b>GATA1</b> | GATA binding protein 1 (globin transcription factor 1)              | 2623 | X  | Xp11.23 | yes |  | Megakaryoblastic leukaemia of Down syndrome |  |  | L | Dom | Mis; F  |     |     | P15976; ERYF1; GF1; NFE1; ENSG0000102145; GATA1; 2623                                                                                       |
| <b>GATA2</b> | GATA binding protein 2                                              | 2624 | 3  | 3q21.3  | yes |  | AML (CML blast transformation)              |  |  | L | Dom | Mis     |     |     | 2624; NFE1B; P23769; MGC2306; ENSG0000179348; GATA2                                                                                         |
| <b>GATA3</b> | GATA binding protein 3                                              | 2625 | 10 | 10p15   | yes |  | Breast                                      |  |  | E | Rec | F; N; S |     | yes | HDR syndrome (HYPOPARATHYROIDISM; SENSORINEURAL DEAFNESS; AND RENAL DISEASE)<br>GATA3; HDR; MGC2346; MGC5199; MGC5445; ENSG0000107485; 2625 |
| <b>GMPS</b>  | Guanine monophosphate synthetase                                    | 8833 | 3  | 3q24    | yes |  | AML                                         |  |  | L | Dom | T       | MLL |     | 8833; ENSG0000163655; GMPS                                                                                                                  |
| <b>GNA11</b> | Guanine nucleotide binding protein (G protein); alpha 11 (Gq class) | 2767 | 19 | 19p13.3 | yes |  | Uveal melanoma                              |  |  | E | Dom | Mis     |     |     | GNA11; GNA-11; ENSG0000088256; 2767                                                                                                         |

|               |                                                                                          |       |    |         |     |     |                   |                                |  |   |       |                    |     |                                                              |                                                                                                                                                                                               |
|---------------|------------------------------------------------------------------------------------------|-------|----|---------|-----|-----|-------------------|--------------------------------|--|---|-------|--------------------|-----|--------------------------------------------------------------|-----------------------------------------------------------------------------------------------------------------------------------------------------------------------------------------------|
| <b>GNAQ</b>   | Guanine nucleotide binding protein (G protein); q polypeptide                            | 2776  | 9  | 9q21    | yes |     | Uveal melanoma    |                                |  | E | Dom   | Mis                |     |                                                              | 2776; P50148; GAQ; RP11-494N1_1; G-ALPHA-q; ENSG00000156052; GNAQ                                                                                                                             |
| <b>GNAS</b>   | Guanine nucleotide binding protein (G protein); alpha stimulating activity polypeptide 1 | 2778  | 20 | 20q13.2 | yes |     | Pituitary adenoma |                                |  | E | Dom   | Mis                | yes | McCune-Albright syndrome ; pseudohypoparathyroidism; type IA | 2778; RP4-543J19_4; PHP1B; XLalphas; AHO; GSA; PHP1A; XL; MGC33735; XL2; dJ806M20_3_3; Gnas; GPSA; SCG6; dJ309F20_1_1; C20orf45; GNAS1; GNASXL; POH; GSP; NESP; NESP55; ENSG00000087460; GNAS |
| <b>GOLGA5</b> | Golgi autoantigen; golgin subfamily a; 5 (PTC5)                                          | 9950  | 14 | 14q     | yes |     | Papillary thyroid |                                |  | E | Dom   | T                  | RET |                                                              | 9950; ret-II; Q8TBA6; golgin-84; rfg5; ENSG00000066455; GOLGA5                                                                                                                                |
| <b>GOPC</b>   | Golgi associated PDZ and coiled-coil motif containing                                    | 57120 | 6  | 6q21    | yes |     | Glioblastoma      |                                |  | O | Dom   | O                  |     |                                                              |                                                                                                                                                                                               |
| <b>GPC3</b>   | Glypican 3                                                                               | 2719  | X  | Xq26.1  |     | yes | Wilms tumour      | Simpson-Golabi-Behmel syndrome |  | O | Rec/X | T; D; Mis; N; F; S |     |                                                              | 2719; OCI-5; SGBS1; AC002420_1; P51654; SDYS; DGSX; SGB; SGBS; ENSG00000147257; GPC3                                                                                                          |
| <b>GPHN</b>   | Gephyrin (GPH)                                                                           | 10243 | 14 | 14q24   | yes |     | AL                |                                |  | L | Dom   | T                  | MLL |                                                              | 10243; ENSG00000171723; GPHN                                                                                                                                                                  |

|                  |                                                                                                |       |    |             |     |  |                 |  |  |   |     |         |        |  |                                                                                                |
|------------------|------------------------------------------------------------------------------------------------|-------|----|-------------|-----|--|-----------------|--|--|---|-----|---------|--------|--|------------------------------------------------------------------------------------------------|
| <b>GRAF</b>      | Gtpase regulator associated with focal adhesion kinase pp125(FAK)                              | 23092 | 5  | 5q31        | yes |  | AML; MDS        |  |  | L | Dom | T; F; S | MLL    |  | OPHN1L1; KIAA0621; FLJ42530; GRAF; OPHN1L; ENSG00000145819; 23092; ARHGAP26                    |
| <b>H3F3A</b>     | H3 histone; family 3A                                                                          | 3020  | 1  | 1q42.1<br>2 | yes |  | Glioma          |  |  | O | Dom | Mis     |        |  | ENSG00000163041; H3F3A; 3020; H3_3A; H3F3; MGC87782; MGC87783; H3_3B; H3F3A; LOC347376; P84243 |
| <b>H3F3B</b>     | H3 histone; family 3B (H3.3B)                                                                  | 3021  | 17 | q25.1       | yes |  | Chondroblastoma |  |  | M | Dom | Mis     |        |  | 3021; H3_3A; H3F3; MGC87782; MGC87783; H3_3B; H3F3A; LOC347376; P84243; ENSG00000132475; H3F3B |
| <b>HCMOG T-1</b> | Sperm antigen HCMOGT-1                                                                         | 92521 | 17 | 17p11.2     | yes |  | JMML            |  |  | L | Dom | T       | PDGFRB |  | SPECC1; FLJ36955; HCMOGT-1; NSP; Q5M775; ENSG00000128487; CYTSB; SPECC1; 92521                 |
| <b>HEAB</b>      | ATP_GTP binding protein                                                                        | 10978 | 11 | 11q12       | yes |  | AML             |  |  | L | Dom | T       | MLL    |  | 10978; ENSG00000172409; HEAB; Q92989; hClp1; CLP1                                              |
| <b>HERPUD 1</b>  | Homocysteine-inducible; endoplasmic reticulum stress-inducible; ubiquitin-like domain member 1 | 9709  | 16 | 16q12.2-q13 | yes |  | prostate        |  |  | E | Dom | T       | ERG    |  | 9709; ENSG00000051108; HERP; KIAA0025; Mif1; SUP; Q15011; HERPUD1                              |



|                 |                                                   |       |    |         |     |  |                                                                     |  |  |      |     |     |        |     |                 |                                                                                                                                                                                    |
|-----------------|---------------------------------------------------|-------|----|---------|-----|--|---------------------------------------------------------------------|--|--|------|-----|-----|--------|-----|-----------------|------------------------------------------------------------------------------------------------------------------------------------------------------------------------------------|
| <b>HEY1</b>     | Hairy/enhancer-of-split related with YRPW motif 1 | 23462 | 8  | 8q21    | yes |  | Mesenchymal chondrosarcoma                                          |  |  | M    | Dom | T   | NCOA2  |     |                 | HESR1; HERP2; OAF1; CHF-2; HRT-1; MGC1274; HESR-1; CHF2; ENSG00000164683; HEY1; 23462                                                                                              |
| <b>HIP1</b>     | Huntingtin interacting protein 1                  | 3092  | 7  | 7q11.23 | yes |  | CMML                                                                |  |  | L    | Dom | T   | PDGFRB |     |                 | 3092; ILWEQ; ENSG00000127946; HIP1                                                                                                                                                 |
| <b>HIST1H3B</b> | Histone cluster 1; h3b                            | 3020  | 6  | 6p22.1  | yes |  | Glioma                                                              |  |  | O    | Dom | Mis |        |     |                 | H3_1; HIST1H3B; 8358; ENSG00000124693; H3/A; H3FA; H3/I; H3FL; H3/c; H3FC; H3/b; H3FB; H3/d; H3FD; H3/i; H3FI; H3/h; H3FH; H3/k; H3F1K; H3FK; H3_f; H3/f; H3FF; H3/j; H3FJ; P68431 |
| <b>HIST1H4I</b> | Histone 1; H4i (H4FM)                             | 8294  | 6  | 6p21.3  | yes |  | NHL                                                                 |  |  | L    | Dom | T   | BCL6   |     |                 | 8294; HIST4H4; MGC24116; P62805; HIST1H4I                                                                                                                                          |
| <b>HLF</b>      | Hepatic leukemia factor                           | 3131  | 17 | 17q22   | yes |  | ALL                                                                 |  |  | L    | Dom | T   | TCF3   |     |                 | 3131; Q16534; ENSG00000108924; HLF                                                                                                                                                 |
| <b>HLXB9</b>    | Homeo box HB9                                     | 3110  | 7  | 7q36    | yes |  | AML                                                                 |  |  | L    | Dom | T   | ETV6   | yes | CURRANOSYNDROME | 3110; HB9; HLXB9; P50219; ENSG00000130675; HLXB9                                                                                                                                   |
| <b>HMGAI</b>    | High mobility group AT-hook 1                     | 3159  | 6  | 6p21    | yes |  | Microfollicular thyroid adenoma; various benign mesenchymal tumours |  |  | E; M | Dom | T   | ?      |     |                 | HMGAI; MGC4242; HMG-R; MGC4854; P17096; HMG1Y; MGC12816; ENSG00000137309; 3159                                                                                                     |

|                  |                                               |       |    |            |     |  |                                                       |  |  |   |     |   |                                                                            |  |                                                                                   |
|------------------|-----------------------------------------------|-------|----|------------|-----|--|-------------------------------------------------------|--|--|---|-----|---|----------------------------------------------------------------------------|--|-----------------------------------------------------------------------------------|
| <b>HMG2</b>      | High mobility group AT-hook 2 (HMGIC)         | 8091  | 12 | 12q15      | yes |  | Lipoma; leiomyoma; pleomorphic salivary gland adenoma |  |  | M | Dom | T | LHFP; RAD51L1; LPP; COX6C; CMKOR1; NFIB; ALDH2; CCNB1IP1; EBF1; WIF1; FHIT |  | 8091; HMGIC; BABL; HMGIC; LIPO; ENSG00000149948; HMG2                             |
| <b>HNRNPA2B1</b> | Heterogeneous nuclear ribonucleoprotein A2/B1 | 3181  | 7  | 7p15       | yes |  | Prostate                                              |  |  | E | Dom | T | ETV1                                                                       |  | HNRNPA2B1; ENSG00000122566; 3181; HNRNPA2; HNRNPB1; HNRPB1; RNPA2; SNRPB1; HNRPA2 |
| <b>HOOK3</b>     | Hook homolog 3                                | 84376 | 8  | 8p11.21    | yes |  | Papillary thyroid                                     |  |  | E | Dom | T | RET                                                                        |  | 84376; ENSG00000168172; HK3; Q86VS8; HOOK3                                        |
| <b>HOXA11</b>    | Homeo box A11                                 | 3207  | 7  | 7p15-p14.2 | yes |  | CML                                                   |  |  | L | Dom | T | NUP98                                                                      |  | HOXA11; HOX1; P31270; HOX1I; ENSG00000005073; 3207                                |
| <b>HOXA13</b>    | Homeo box A13                                 | 3209  | 7  | 7p15-p14.2 | yes |  | AML                                                   |  |  | L | Dom | T | NUP98                                                                      |  | HOX1; P31271; HOX1J; ENSG00000106031; 3209; HOXA13                                |
| <b>HOXA9</b>     | Homeo box A9                                  | 3205  | 7  | 7p15-p14.2 | yes |  | AML*                                                  |  |  | L | Dom | T | NUP98; MSI2                                                                |  | HOXA9; HOX1; P31269; HOX1G; ENSG00000078399; 3205                                 |
| <b>HOXC11</b>    | Homeo box C11                                 | 3227  | 12 | 12q13.3    | yes |  | AML                                                   |  |  | L | Dom | T | NUP98                                                                      |  | 3227; HOX3H; O43248; ENSG00000123388; HOXC11                                      |
| <b>HOXC13</b>    | Homeo box C13                                 | 3229  | 12 | 12q13.3    | yes |  | AML                                                   |  |  | L | Dom | T | NUP98                                                                      |  | 3229; HOX3G; HOX3; P31276; ENSG00000123364; HOXC13                                |
| <b>HOXD11</b>    | Homeo box D11                                 | 3237  | 2  | 2q31-q32   | yes |  | AML                                                   |  |  | L | Dom | T | NUP98                                                                      |  | 3237; ENSG00000128713; HOXD11                                                     |
| <b>HOXD13</b>    | Homeo box D13                                 | 3239  | 2  | 2q31-q32   | yes |  | AML*                                                  |  |  | L | Dom | T | NUP98                                                                      |  | 3239; SPD; HOX4I; P35453; HOXD13                                                  |

|              |                                                                        |      |    |              |     |     |                                                          |                                                               |                      |         |     |     |      |  |                                                                                                                                                         |
|--------------|------------------------------------------------------------------------|------|----|--------------|-----|-----|----------------------------------------------------------|---------------------------------------------------------------|----------------------|---------|-----|-----|------|--|---------------------------------------------------------------------------------------------------------------------------------------------------------|
| <b>HRAS</b>  | V-Ha-ras<br>Harvey rat<br>sarcoma viral<br>oncogene<br>homolog         | 3265 | 11 | 11p15.<br>5  | yes | yes | Infrequent<br>sarcomas;<br>rare other<br>tumour<br>types | Rhabdomyosar<br>coma;<br>ganglioneurobl<br>astoma;<br>bladder | Costello<br>syndrome | E; L; M | Dom | Mis |      |  | HRAS; K-ras; N-ras;<br>P01112; c-bas/has;<br>RASH1; HRAS1;<br>ENSG00000174775;<br>3265                                                                  |
| <b>HSPCA</b> | Heat shock 90<br>kDa protein 1;<br>$\alpha$                            | 3320 | 14 | 14q32.<br>31 | yes |     | NHL                                                      |                                                               |                      | L       | Dom | T   | BCL6 |  | 3320; FLJ31884;<br>HSP86; Hsp89; Hsp90;<br>HSP90A; HSP90N;<br>HSPC1; HSPCA;<br>HSPCAL1; HSPCAL4;<br>HSPN; LAP2; P07900;<br>ENSG00000080824;<br>HSP90AA1 |
| <b>HSPCB</b> | Heat shock 90<br>kDa protein 1;<br>$\beta$                             | 3326 | 6  | 6p12         | yes |     | NHL                                                      |                                                               |                      | L       | Dom | T   | BCL6 |  | 3326; HSPCB;<br>FLJ26984; HSPC2;<br>D6S182; P08238;<br>HSP90-BETA;<br>HSP90B;<br>ENSG00000096384;<br>HSP90AB1                                           |
| <b>IDH1</b>  | Isocitrate<br>dehydrogenase<br>1 (NADP <sup>+</sup> );<br>soluble      | 3417 | 2  | 2q33.3       | yes |     | Glioblastom<br>a                                         |                                                               |                      | O       | Dom | Mis |      |  | IDH1; IDP; O75874;<br>PICD; IDH;<br>ENSG00000138413;<br>3417                                                                                            |
| <b>IDH2</b>  | Socitrate<br>dehydrogenase<br>2 (NADP <sup>+</sup> );<br>mitochondrial | 3418 | 15 | 15q26.<br>1  | yes |     | Glioblastom<br>a                                         |                                                               |                      | M       | Dom | M   |      |  | ICD-M; P48735; IDP;<br>IDH; mNADP-IDH;<br>ENSG00000182054;<br>IDHM; IDH2; 3418                                                                          |

|              |                             |       |    |               |     |  |                                                    |  |  |   |          |      |                                                                                                                              |  |  |                                                                                |
|--------------|-----------------------------|-------|----|---------------|-----|--|----------------------------------------------------|--|--|---|----------|------|------------------------------------------------------------------------------------------------------------------------------|--|--|--------------------------------------------------------------------------------|
| <b>IGH@</b>  | Immunoglobulin heavy locus  | 3492  | 14 | 14q32.33      | yes |  | MM; Burkitt lymphoma; NHL; CLL; B-ALL; MALT; MLCLS |  |  | L | Dom      | T    | MYC; FGFR3; PAX5; IRTA1; IRF4; CCND1; BCL9; BCL8; BCL6; BCL2; BCL3; BCL10; BCL11A. LHX4; DDX6; NFKB2; PAFAH1B2; PCSK7; CRLF2 |  |  |                                                                                |
| <b>IGK@</b>  | Immunoglobulin kappa locus  | 50802 | 2  | 2p12          | yes |  | Burkitt lymphoma; B-NHL                            |  |  | L | Dom      | T    | MYC; FVT1                                                                                                                    |  |  |                                                                                |
| <b>IGL@</b>  | Immunoglobulin lambda locus | 3535  | 22 | 22q11.1-q11.2 | yes |  | Burkitt lymphoma                                   |  |  | L | Dom      | T    | BCL9; MYC; CCND2                                                                                                             |  |  |                                                                                |
| <b>IKZF1</b> | IKAROS family zinc finger 1 | 10320 | 7  | 7p12.2        | yes |  | ALL; DLBCL                                         |  |  | L | Rec; Dom | D; T | BCL6                                                                                                                         |  |  | Q13422; LyF-1; IKAROS; ZNFN1A1; Hs_54452; ENSG00000185811; 10320; IKZF1; hlk-1 |
| <b>IL2</b>   | Interleukin 2               | 3558  | 4  | 4q26-q27      | yes |  | Intestinal T-cell lymphoma                         |  |  | L | Dom      | T    | TNFRSF17                                                                                                                     |  |  | 3558; IL-2; P60568; ENSG00000109471; IL2                                       |
| <b>IL21R</b> | Interleukin 21 receptor     | 50615 | 16 | 16p11         | yes |  | NHL                                                |  |  | L | Dom      | T    | BCL6                                                                                                                         |  |  | IL21R; Q9HBE5; ENSG00000103522; 50615                                          |

|              |                                                                |       |    |              |     |  |                                         |  |  |   |     |           |                 |     |                                                                                                     |
|--------------|----------------------------------------------------------------|-------|----|--------------|-----|--|-----------------------------------------|--|--|---|-----|-----------|-----------------|-----|-----------------------------------------------------------------------------------------------------|
| <b>IL6ST</b> | Interleukin 6 signal transducer (gp130; oncostatin M receptor) | 3572  | 5  | 5q11         | yes |  | Hepatocellular carcinoma                |  |  | E | Dom | O         |                 |     | GP130; CDw130; CD130; GP130-RAPS; IL6R-beta; P40189; ENSG00000134352; IL6ST; 3572                   |
| <b>IL7R</b>  | Interleukin 7 receptor                                         | 3575  | 5  | 5p13         | yes |  | ALL; ETP ALL                            |  |  | L | Dom | Mis; O    |                 | yes | Severe combined immunodeficiency<br>ENSG00000168685; IL7R; 3575; CD127; CDW127; IL-7R-alpha; P16871 |
| <b>IRF4</b>  | Interferon regulatory factor 4                                 | 3662  | 6  | 6p25-p23     | yes |  | MM                                      |  |  | L | Dom | T         | IGH@            |     | 3662; LSIRF; Q15306; MUM1; ENSG00000137265; IRF4                                                    |
| <b>IRTA1</b> | Immunoglobulin superfamily receptor translocation associated 1 | 83417 | 1  | 1q21         | yes |  | B-NHL                                   |  |  | L | Dom | T         | IGH@            |     | 83417; FCRH4; IGFP2; IRTA1; ENSG00000163518; FCRL4                                                  |
| <b>ITK</b>   | IL2-inducible T-cell kinase                                    | 3702  | 5  | 5q31-q32     | yes |  | Peripheral T-cell lymphoma              |  |  | L | Dom | T         | SYK             |     | 3702; PSCTK2; MGC126257; LYK; MGC126258; EMT; ENSG00000113263; Q08881; ITK                          |
| <b>JAK1</b>  | Janus kinase 1                                                 | 3716  | 1  | 1p32.3-p31.3 | yes |  | ALL                                     |  |  | L | Dom | Mis       |                 |     | JAK1A; JAK1_ENST00000342505; 3716; ENSG00000162434; JAK1B; JTK3; P23458                             |
| <b>JAK2</b>  | Janus kinase 2                                                 | 3717  | 9  | 9p24         | yes |  | ALL; AML; MPN; CML                      |  |  | L | Dom | T; Mis; O | ETV6; PCM1; BCR |     | O60674; JAK2_ENST00000381652; 3717; ENSG0000096968; JTK10                                           |
| <b>JAK3</b>  | Janus kinase 3                                                 | 3718  | 19 | 19p13.1      | yes |  | Acute megakaryocytic leukaemia; ETP ALL |  |  | L | Dom | Mis       |                 |     | 3718; L-JAK; JAK3_HUMAN; LJAK; JAK-3; JAKL; ENSG00000105639; P52333; JAK3                           |

|                 |                                                              |        |    |                |     |     |                            |         |                                      |      |     |            |       |     |                  |                                                                                               |
|-----------------|--------------------------------------------------------------|--------|----|----------------|-----|-----|----------------------------|---------|--------------------------------------|------|-----|------------|-------|-----|------------------|-----------------------------------------------------------------------------------------------|
| <b>JAZF1</b>    | Juxtaposed with another zinc finger gene 1                   | 221895 | 7  | 7p15.2-p15.1   | yes |     | Endometrial stromal tumour |         |                                      | M    | Dom | T          | SUZ12 |     |                  | 221895; Q86VZ6; ENSG00000153814; JAZF1                                                        |
| <b>JUN</b>      | Jun oncogene                                                 | 3725   | 1  | 1p32-p31       | yes |     | Sarcoma                    |         |                                      | M    | Dom | A          |       |     |                  | JUN; P05412; c-Jun; AP1; ENSG00000177606; 3725                                                |
| <b>KCNJ5</b>    | Potassium inwardly-rectifying channel; subfamily J; member 5 | 3762   | 11 | 11q24          | yes | yes | Adrenal adenoma            | Adrenal | Familial hyperaldosteronism type III | E    | Dom | Mis        |       | yes | Long QT syndrome | 3762; ENSG00000120457; CIR; GIRK4; KATP1; KIR3_4; P48544; KCNJ5                               |
| <b>KDM5A</b>    | Lysine (K)-specific demethylase 5A; JARID1A                  | 5927   | 12 | 12p11          | yes |     | AML                        |         |                                      | L    | Dom | T          | NUP98 |     |                  | 5927; RBBP2; RBP2; JARID1A; ENSG00000073614; JARID1A                                          |
| <b>KDM5C</b>    | Lysine (K)-specific demethylase 5C (JARID1C)                 | 8242   | X  | Xp11.22-p11.21 | yes |     | Clear cell renal carcinoma |         |                                      | E    | Rec | N; F; S    |       |     |                  | SMCX; XE169; RP11-258C19_2; MRXJ; MRXSJ; DXS1272E; ENSG00000126012; SMCX; 8242; JARID1C       |
| <b>KDM6A</b>    | Lysine (K)-specific demethylase 6A; UTX                      | 7403   | X  | Xp11.2         | yes |     | Renal; oesophageal SCC; MM |         |                                      | E; L | Rec | D; N; F; S |       |     |                  | UTX; O15550; bA386N14_2; MGC141941; RP13-886N14_3; DKFZp686A03225; 7403; ENSG00000147050; UTX |
| <b>KDR</b>      | Vascular endothelial growth factor receptor 2                | 3791   | 4  | 4q11-q12       | yes |     | NSCLC; angiosarcoma        |         |                                      | E    | Dom | Mis        |       |     |                  | 3791; VEGFR2; FLK1; CD309; VEGFR; P35968; KDR; ENSG00000128052                                |
| <b>KIAA1549</b> | Kiaa1549                                                     | 57670  | 7  | 7q34           | yes |     | Pilocytic astrocytoma      |         |                                      | O    | Dom | O          | BRAF  |     |                  | 57670; ENSG00000122778; KIAA1549                                                              |

|              |                                                               |      |    |            |     |     |                                                                |                   |                                          |            |     |           |            |     |                                                                                                  |
|--------------|---------------------------------------------------------------|------|----|------------|-----|-----|----------------------------------------------------------------|-------------------|------------------------------------------|------------|-----|-----------|------------|-----|--------------------------------------------------------------------------------------------------|
| <b>KIF5B</b> | Kinesin family member 5B                                      | 3799 | 10 | 10p11.22   | yes |     | NSCLC                                                          |                   |                                          | E          | Dom | T         | RET; ALK   |     | 3799;<br>ENSG00000170759;<br>KINH; KNS; KNS1;<br>UKHC; P33176; KIF5B                             |
| <b>KIT</b>   | V-kit Hardy-Zuckerman 4 feline sarcoma viral oncogene homolog | 3815 | 4  | 4q12       | yes | yes | GIST; AML; TGCT; mastocytosis ; mucosal melanoma               | GIST; epithelioma | Familial gastrointestinal stromal tumour | L; M; O; E | Dom | Mis; O    |            | yes | Piebald trait<br>3815; C-Kit; P10721; SCFR; CD117; ENSG00000157404; KIT                          |
| <b>KLF4</b>  | Kruppel-like factor 4                                         | 9314 | 9  | 9q31       | yes |     | Meningioma                                                     |                   |                                          | O          | Dom | Mis       |            |     | KLF4; EZF; O43474; GKLF; ENSG00000136826; 9314                                                   |
| <b>KLK2</b>  | Kallikrein-related peptidase 2                                | 3817 | 19 | 19q13.41   | yes |     | Prostate                                                       |                   |                                          | E          | Dom | T         | ETV4       |     | KLK2; P20151; KLK2A2; hK2; MGC12201; ENSG00000167751; 3817                                       |
| <b>KMT2D</b> | Lysine (K)-specific methyltransferase 2D                      | 8085 | 12 | 12q13.12   | yes |     | Medulloblastoma; renal                                         |                   |                                          | O; E       | Rec | N; F; Mis |            |     | KMT2D; ENSG00000167548; MLL2; 8085                                                               |
| <b>KRAS</b>  | V-Ki-ras2 Kirsten rat sarcoma 2 viral oncogene homolog        | 3845 | 12 | 12p12.1    | yes |     | Pancreatic; colorectal; lung; thyroid; AML; other tumour types |                   |                                          | L; E; M; O | Dom | Mis       |            |     | K-RAS2B; C-K-RAS; RASK2; KRAS1; K-RAS4B; K-RAS2A; K-RAS4A; KRAS2; KIRAS; NS3; P01116; 3845; KRAS |
| <b>KTN1</b>  | Kinectin 1 (kinesin receptor)                                 | 3895 | 14 | 14q22.1    | yes |     | Papillary thyroid                                              |                   |                                          | E          | Dom | T         | RET        |     | KTN1; Q86UP2; CG1; KIAA0004; ENSG00000126777; 3895                                               |
| <b>LAF4</b>  | Lymphoid nuclear protein related to AF4                       | 3899 | 2  | 2q11.2-q12 | yes |     | ALL; T-ALL                                                     |                   |                                          | L          | Dom | T         | MLL; RUNX1 |     | MLL2-like; P51826; LAF4; ENSG00000144218; AFF3; 3899                                             |

|              |                                                |       |    |               |     |     |                      |               |  |   |     |      |       |  |                                                                                                                 |
|--------------|------------------------------------------------|-------|----|---------------|-----|-----|----------------------|---------------|--|---|-----|------|-------|--|-----------------------------------------------------------------------------------------------------------------|
| <b>LASP1</b> | LIM and SH3 protein 1                          | 3927  | 17 | 17q11-q21.3   | yes |     | AML                  |               |  | L | Dom | T    | MLL   |  | 3927; ENSG00000002834; Lasp-1; MLN50; Q14847; LASP1                                                             |
| <b>LCK</b>   | Lymphocyte-specific protein tyrosine kinase    | 3932  | 1  | 1p35-p34.3    | yes |     | T-ALL                |               |  | L | Dom | T    | TRB@  |  | 3932; YT16; pp58lck; p56lck; ENSG00000182866; P06239; LCK                                                       |
| <b>LCPI</b>  | Lymphocyte cytosolic protein 1 (L-plastin)     | 3936  | 13 | 13q14.1-q14.3 | yes |     | NHL                  |               |  | L | Dom | T    | BCL6  |  | LCPI; CP64; LC64P; PLS2; FLJ26114; P13796; FLJ25423; L-PLASTIN; DKFZp781A23186; FLJ39956; ENSG00000136167; 3936 |
| <b>LCX</b>   | Leukemia-associated protein with a CXXC domain | 80312 | 10 | 10q21         | yes |     | AML                  |               |  | L | Dom | T    | MLL   |  | 80312; KIAA1676; LCX; Q8NFU7; TET1; bA119F7_1; CXXC6; ENSG00000138336; CXXC6                                    |
| <b>LHFP</b>  | Lipoma HMGIC fusion partner                    | 10186 | 13 | 13q12         | yes |     | Lipoma               |               |  | M | Dom | T    | HMGA2 |  | 10186; MGC22429; ENSG00000183722; LHFP                                                                          |
| <b>LIFR</b>  | Leukemia inhibitory factor receptor            | 3977  | 5  | 5p13-p12      | yes |     | Salivary adenoma     |               |  | E | Dom | T    | PLAG1 |  | LIFR; SJS2; CD118; STWS; SWS; 3977; ENSG00000113594                                                             |
| <b>LMO1</b>  | LIM domain only 1 (rhombotin 1) (RBTN1)        | 4004  | 11 | 11p15         | yes | yes | T-ALL; neuroblastoma | Neuroblastoma |  | L | Dom | T; A | TRD@  |  | P25800; RBTN1; TTG1; RHOM1; ENSG00000166407; LMO1; 4004                                                         |
| <b>LMO2</b>  | LIM domain only 2 (rhombotin-like 1) (RBTN2)   | 4005  | 11 | 11p13         | yes |     | T-ALL                |               |  | L | Dom | T    | TRD@  |  | LMO2; RBTN2; RHOM2; RBTN1; TTG2; P25791; ENSG00000135363; 4005                                                  |



|               |                                                                                       |        |    |               |     |     |                                                    |                        |                    |      |     |              |                     |  |                                                                      |
|---------------|---------------------------------------------------------------------------------------|--------|----|---------------|-----|-----|----------------------------------------------------|------------------------|--------------------|------|-----|--------------|---------------------|--|----------------------------------------------------------------------|
| <b>LPP</b>    | LIM domain containing preferred translocation partner in lipoma                       | 4026   | 3  | 3q28          | yes |     | Lipoma; leukaemia                                  |                        |                    | L; M | Dom | T            | HMGA2; MLL; C12orf9 |  | 4026; Q93052; ENSG00000145012; LPP                                   |
| <b>LRIG3</b>  | Leucine-rich repeats and immunoglobulin-like domains 3                                | 121227 | 12 | 12q14.1       | yes |     | NSCLC                                              |                        |                    | E    | Dom | T            | ROS1                |  | Q6UXM1; FLJ26573; KIAA3016; FLJ90440; ENSG00000139263; LRIG3; 121227 |
| <b>LYL1</b>   | Lymphoblastic leukemia derived sequence 1                                             | 4066   | 19 | 19p13.2-p13.1 | yes |     | T-ALL                                              |                        |                    | L    | Dom | T            | TRB@                |  | LYL1; P12980; ENSG00000104903; 4066                                  |
| <b>MADH4</b>  | Homolog of Drosophila Mothers Against Decapentaplegic 4 gene                          | 4089   | 18 | 18q21.1       | yes | yes | Colorectal; pancreatic; small intestine            | Gastrointestinal polyp | Juvenile polyposis | E    | Rec | D; Mis; N; F |                     |  | Q13485; JIP; DPC4; MADH4; ENSG00000141646; 4089; SMAD4               |
| <b>MAF</b>    | V-maf musculoaponeurotic fibrosarcoma oncogene homolog                                | 4094   | 16 | 16q22-q23     | yes |     | MM                                                 |                        |                    | L    | Dom | T            | IGH@                |  | MAF; MGC71685; 4094; ENSG00000178573                                 |
| <b>MAFB</b>   | V-maf musculoaponeurotic fibrosarcoma oncogene homolog B (avian)                      | 9935   | 20 | 20q11.2-q13.1 | yes |     | MM                                                 |                        |                    | L    | Dom | T            | IGH@                |  | 9935; Q9Y5Q3; KRML; MGC43127; ENSG00000204103; MAFB                  |
| <b>MALAT1</b> | Metastasis associated lung adenocarcinoma transcript 1 ( lnc-RNA; non-protein coding) | 378938 | 11 | 11q31.1       | yes |     | Renal cell carcinoma (childhood epithelioid); lung |                        |                    | E    | Dom | T            | TFEB                |  | MALAT1; Q9UHZ2; 378938; PRO1073                                      |

|               |                                                                 |       |    |                |     |     |                                                           |                  |  |      |     |           |                |                               |                                                                                                                 |
|---------------|-----------------------------------------------------------------|-------|----|----------------|-----|-----|-----------------------------------------------------------|------------------|--|------|-----|-----------|----------------|-------------------------------|-----------------------------------------------------------------------------------------------------------------|
| <b>MALT1</b>  | Mucosa associated lymphoid tissue lymphoma translocation gene 1 | 10892 | 18 | 18q21          | yes |     | MALT                                                      |                  |  | L    | Dom | T         | BIRC3          |                               | MALT1;<br>ENSG00000172175;<br>10892                                                                             |
| <b>MAML2</b>  | Mastermind-like 2 (Drosophila)                                  | 84441 | 11 | 11q22-q23      | yes |     | Salivary gland mucoepidermoid                             |                  |  | E    | Dom | T         | MECT1;<br>CRT3 |                               | MAM2; MAM3;<br>DKFZp686N0150;<br>KIAA1819; MLL-<br>MAML2; Q8IZL2;<br>MAM-3;<br>ENSG00000184384;<br>84441; MAML2 |
| <b>MAP2K1</b> | Mitogen-activated protein kinase kinase 1                       | 5604  | 15 | 15q22.1-q22.33 | yes |     | NSCLC; melanoma; colorectal                               |                  |  | E    | Dom | Mis       |                | Cardiofaciocutaneous syndrome | 5604; PRKMK1; MKK1; MEK1; Q02750; ENSG00000169032; MAP2K1; MAPKK1                                               |
| <b>MAP2K2</b> | Mitogen-activated protein kinase kinase 2                       | 5605  | 19 | 19p13.3        | yes |     | NSCLC; melanoma                                           |                  |  | E    | Dom | Mis       |                | Cardiofaciocutaneous syndrome | MAP2K2; MEK2; PRKMK2; MAPKK2; MKK2; ENSG00000126934; P36507; 5605                                               |
| <b>MAP2K4</b> | Mitogen-activated protein kinase kinase 4                       | 6416  | 17 | 17p11.2        | yes |     | Pancreatic; breast; colorectal                            |                  |  | E    | Rec | D; Mis; N |                |                               | SERK1; MEK4; SEK1; JNKK; MAPKK4; PRKMK4; MKK4; JNKK1; ENSG00000065559; P45985; MAP2K4; 6416                     |
| <b>MAX</b>    | Myc associated factor X                                         | 4149  | 14 | 14q23          | yes | yes | Pheochromocytoma; endometrioid carcinoma; colon carcinoma | Pheochromocytoma |  | E; O | Rec | Mis; N; F |                |                               | 4149; MGC36767; MGC34679; orf1; MGC11225; P61244; MGC10775; ENSG00000125952; MGC18164; MAX                      |

|              |                                          |        |    |       |     |     |                                                       |                                                                          |                                     |            |     |                 |       |     |                                                                                                                                  |
|--------------|------------------------------------------|--------|----|-------|-----|-----|-------------------------------------------------------|--------------------------------------------------------------------------|-------------------------------------|------------|-----|-----------------|-------|-----|----------------------------------------------------------------------------------------------------------------------------------|
| <b>MDM2</b>  | Mdm2 p53 binding protein homolog         | 4193   | 12 | 12q15 | yes |     | Sarcoma; glioma; colorectal; other tumour types       |                                                                          |                                     | M; O; E; L | Dom | A               |       |     | 4193; HDM2; Q00987; hdm2; MGC71221; HDMX; ENSG00000135679; MDM2                                                                  |
| <b>MDM4</b>  | Mdm4 p53 binding protein homolog         | 4194   | 1  | 1q32  | yes |     | Glioblastoma; bladder; retinoblastoma                 |                                                                          |                                     | M          | Dom | A               |       |     | MDM4; DKFZp781B1423; MGC132766; MRP1; MDMX; RP11-430C7_1; ENSG00000198625; 4194                                                  |
| <b>MDS1</b>  | Myelodysplasia syndrome 1                | 2122   | 3  | 3q26  | yes |     | MDS; AML                                              |                                                                          |                                     | L          | Dom | T               | RUNX1 |     | 4197; MDS1-EV11; Q13465; PRDM3; MDS1                                                                                             |
| <b>MDS2</b>  | Myelodysplastic syndrome 2               | 259283 | 1  | 1p36  | yes |     | MDS                                                   |                                                                          |                                     | L          | Dom | T               | ETV6  |     | MDS2; Q8NDY4; ENSG00000197880; 259283                                                                                            |
| <b>MECT1</b> | Mucoepidermoid translocated 1            | 23373  | 19 | 19p13 | yes |     | Salivary gland mucoepidermoid                         |                                                                          |                                     | E          | Dom | T               | MAML2 |     | 23373; Q6UUV9; FLJ14027; WAMTP1; MECT1; TORC1; KIAA0616; ENSG00000105662; CRTC1                                                  |
| <b>MED12</b> | Mediator complex subunit 12              | 9968   | X  | Xq13  | yes |     | Uterine leiomyoma                                     |                                                                          |                                     | M          | Dom | M; S            |       | Yes | Opitz-Kaveggia Syndrome<br>Q93074; MED12_ENST00000374080; 9968; ARC240; CAGH45; FGS1; HOPA; OKS; OPA1; TNRC11; TRAP230; KIAA0192 |
| <b>MEN1</b>  | Multiple endocrine neoplasia type 1 gene | 4221   | 11 | 11q13 | yes | yes | Parathyroid tumours; pancreatic neuroendocrine tumour | Parathyroid adenoma; pituitary adenoma; pancreatic islet cell; carcinoid | Multiple endocrine neoplasia type 1 | E          | Rec | D; Mis; N; F; S |       |     | MEN1; ENSG00000133895; 4221                                                                                                      |

|             |                                                        |       |    |        |     |     |                                          |                                       |                                                             |      |     |                 |     |                                             |                                                                                 |
|-------------|--------------------------------------------------------|-------|----|--------|-----|-----|------------------------------------------|---------------------------------------|-------------------------------------------------------------|------|-----|-----------------|-----|---------------------------------------------|---------------------------------------------------------------------------------|
| <b>MET</b>  | Met proto-oncogene (hepatocyte growth factor receptor) | 4233  | 7  | 7q31   | yes |     | Papillary renal; head-neck squamous cell | Papillary renal                       | Familial papillary renal cancer                             | E    | Dom | Mis             |     |                                             | 4233; RCCP2; AUTS9; HGFR; P08581; ENSG00000105976; MET                          |
| <b>MITF</b> | Microphthalmia-associated transcription factor         | 4286  | 3  | 3p14.1 | yes |     | Melanoma                                 |                                       |                                                             | E    | Dom | A               | yes | Waardenburg syndrome type 2; Tietz syndrome | WS2A; MITF; 4286; ENSG00000187098                                               |
| <b>MKL1</b> | Megakaryoblastic leukemia (translocation) 1            | 57591 | 22 | 22q13  | yes |     | Acute megakaryocytic leukaemia           |                                       |                                                             | L    | Dom | T               |     | RBM15                                       | 57591; BSAC; MAL; MRTF-A; Q969V6; ENSG00000196588; MKL1                         |
| <b>MLF1</b> | Myeloid leukemia factor 1                              | 4291  | 3  | 3q25.1 | yes |     | AML                                      |                                       |                                                             | L    | Dom | T               |     | NPM1                                        | MLF1; P58340; ENSG00000178053; 4291                                             |
| <b>MLH1</b> | E.coli mutl homolog gene                               | 4292  | 3  | 3p21.3 | yes | yes | Colorectal; endometrial; ovarian; CNS    | Colorectal; endometrial; ovarian; CNS | Hereditary non-polyposis colorectal cancer; Turcot syndrome | E; O | Rec | D; Mis; N; F; S |     |                                             | FCC2; COCA2; HNPCC; MGC5172; P40692; HNPCC2; hMLH1; ENSG00000076242; 4292; MLH1 |

|             |                                                                            |       |    |        |     |  |                 |  |  |   |     |      |                                                                                                                                                                                                                                                                                                                 |  |  |                                                                                         |
|-------------|----------------------------------------------------------------------------|-------|----|--------|-----|--|-----------------|--|--|---|-----|------|-----------------------------------------------------------------------------------------------------------------------------------------------------------------------------------------------------------------------------------------------------------------------------------------------------------------|--|--|-----------------------------------------------------------------------------------------|
| <b>MLL</b>  | Myeloid/lymphoid or mixed-lineage leukemia (trithorax homolog; Drosophila) | 4297  | 11 | 11q23  | yes |  | AML; ALL        |  |  | L | Dom | T; O | MLL;<br>MLLT1;<br>MLLT2;<br>MLLT3;<br>MLLT4;<br>MLLT7;<br>MLLT10;<br>MLLT6;<br>ELL;<br>EPS15;<br>AF1Q;<br>CREBBP;<br>SH3GL1;<br>FNBP1;<br>PNUTL1;<br>MSF;<br>GPHN;<br>GMPS;<br>SSH3BP1;<br>ARHGGEF12<br>; GAS7;<br>FOXO3A;<br>LAF4;<br>LCX;<br>SEPT6;<br>LPP;<br>CBFA2T1;<br>GRAF;<br>EP300;<br>PICALM;<br>HEAB |  |  | TRX1; CXXC7;<br>MLL1A; HRX;<br>HTRX1; MLL/GAS7;<br>ENSG00000118058;<br>MLL; 4297; ALL-1 |
| <b>MLL3</b> | Myeloid/lymphoid or mixed-lineage leukemia 3                               | 58508 | 7  | 7q36.1 | yes |  | Medulloblastoma |  |  | O | Rec | N    |                                                                                                                                                                                                                                                                                                                 |  |  | MLL3; 58508;<br>ENSG00000055609                                                         |

|               |                                                                                                        |      |    |         |     |  |     |  |  |   |     |   |                   |  |                                                          |
|---------------|--------------------------------------------------------------------------------------------------------|------|----|---------|-----|--|-----|--|--|---|-----|---|-------------------|--|----------------------------------------------------------|
| <b>MLLT1</b>  | Myeloid/lymphoid or mixed-lineage leukemia (trithorax homolog; Drosophila); translocated to; 1 (ENL)   | 4298 | 19 | 19p13.3 | yes |  | AL  |  |  | L | Dom | T | MLL               |  | Q03111; ENL; LTG19; YEATS1; ENSG00000130382; MLLT1; 4298 |
| <b>MLLT10</b> | Myeloid/lymphoid or mixed-lineage leukemia (trithorax homolog; Drosophila); translocated to; 10 (AF10) | 8028 | 10 | 10p12   | yes |  | AL  |  |  | L | Dom | T | MLL; PICALM; CDK6 |  | 8028; P55197; AF10; ENSG00000078403; MLLT10              |
| <b>MLLT2</b>  | Myeloid/lymphoid or mixed-lineage leukemia (trithorax homolog; Drosophila); translocated to; 2 (AF4)   | 4299 | 4  | 4q21    | yes |  | AL  |  |  | L | Dom | T | MLL               |  | 4299; MLLT2; PBM1; AF-4; P51825; ENSG00000172493; AFF1   |
| <b>MLLT3</b>  | Myeloid/lymphoid or mixed-lineage leukemia (trithorax homolog; Drosophila); translocated to; 3 (AF9)   | 4300 | 9  | 9p22    | yes |  | ALL |  |  | L | Dom | T | MLL               |  | AF9; AF-9; YEATS3; P42568; ENSG00000171843; MLLT3; 4300  |

|              |                                                                                                       |      |    |        |     |  |                 |  |  |      |     |   |      |  |                                                                        |
|--------------|-------------------------------------------------------------------------------------------------------|------|----|--------|-----|--|-----------------|--|--|------|-----|---|------|--|------------------------------------------------------------------------|
| <b>MLLT4</b> | Myeloid/lymphoid or mixed-lineage leukemia (trithorax homolog; Drosophila); translocated to; 4 (AF6)  | 4301 | 6  | 6q27   | yes |  | AL              |  |  | L    | Dom | T |      |  |                                                                        |
| <b>MLLT6</b> | Myeloid/lymphoid or mixed-lineage leukemia (trithorax homolog; Drosophila); translocated to; 6 (AF17) | 4302 | 17 | 17q21  | yes |  | AL              |  |  | L    | Dom | T | MLL  |  | 4302; P55198; AF17; ENSG00000108292; MLLT6                             |
| <b>MLLT7</b> | Myeloid/lymphoid or mixed-lineage leukemia (trithorax homolog; Drosophila); translocated to; 7 (AFX1) | 4303 | X  | Xq13.1 | yes |  | AL              |  |  | L    | Dom | T | MLL  |  | 4303; P98177; MLLT7; AFX1; ENSG00000184481; MLLT7                      |
| <b>MN1</b>   | Meningioma (disrupted in balanced translocation) 1                                                    | 4330 | 22 | 22q13  | yes |  | AML; meningioma |  |  | L; O | Dom | T | ETV6 |  | Q10571; MN1; 4330; ENSG00000169184; dJ353E16_2; MGCR; MGCR1; MGCR1-PEN |

|              |                                                                     |        |    |            |     |     |                                  |                                  |                                            |   |     |                 |       |     |                                             |                                                                                          |
|--------------|---------------------------------------------------------------------|--------|----|------------|-----|-----|----------------------------------|----------------------------------|--------------------------------------------|---|-----|-----------------|-------|-----|---------------------------------------------|------------------------------------------------------------------------------------------|
| <b>MPL</b>   | Myeloproliferative leukemia virus oncogene; thrombopoietin receptor | 4352   | 1  | p34        | yes | yes | MPN                              | MPN                              | Familial essential thrombocythemia         | L | Dom | Mis             |       | yes | congenital amegakaryocytic thrombocytopenia | P40238; TPOR; RP1-92O14_1; C-MPL; MPLV; CD110; ENSG00000117400; MPL; 4352                |
| <b>MSF</b>   | MLL septin-like fusion                                              | 10801  | 17 | 17q25      | yes |     | AML*                             |                                  |                                            | L | Dom | T               | MLL   |     |                                             | NAPB; PNUTL4; SINT1; SeptD1; MSF; AF17q25; KIAA0991; MSF1; SEPT9; ENSG00000184640; 10801 |
| <b>MSH2</b>  | Muts homolog 2 ( <i>E. Coli</i> )                                   | 4436   | 2  | 2p22-p21   | yes | yes | Colorectal; endometrial; ovarian | Colorectal; endometrial; ovarian | Hereditary non-polyposis colorectal cancer | E | Rec | D; Mis; N; F; S |       |     |                                             | 4436; COCA1; P43246; HNPCC1; FCC1; HNPCC; ENSG00000095002; MSH2                          |
| <b>MSH6</b>  | Muts homolog 6 ( <i>E. Coli</i> )                                   | 2956   | 2  | 2p16       | yes | yes | Colorectal                       | Colorectal; endometrial; ovarian | Hereditary non-polyposis colorectal cancer | E | Rec | Mis; N; F; S    |       |     |                                             | MSH6; GTBP; HNPCC5; HSAP; ENSG00000116062; 2956; P52701                                  |
| <b>MSI2</b>  | Musashi homolog 2 ( <i>Drosophila</i> )                             | 124540 | 17 | 17q23.2    | yes |     | CML                              |                                  |                                            | L | Dom | T               | HOXA9 |     |                                             | MSI2; ENSG00000153944; 124540                                                            |
| <b>MSN</b>   | Moesin                                                              | 4478   | X  | Xq11.2-q12 | yes |     | ALCL                             |                                  |                                            | L | Dom | T               | ALK   |     |                                             | MSN; P26038; ENSG00000147065; 4478                                                       |
| <b>MTCP1</b> | Mature T-cell proliferation 1                                       | 4515   | X  | Xq28       | yes |     | T cell prolymphocytic leukaemia  |                                  |                                            | L | Dom | T               | TRA@  |     |                                             | GS1-273L24_4; C6_1B; ENSG00000214827; 4515; MTCP1                                        |
| <b>MUC1</b>  | Mucin 1; transmembrane                                              | 4582   | 1  | 1q21       | yes |     | B-NHL                            |                                  |                                            | L | Dom | T               | IGH@  |     |                                             | MUC1; PEM; H23AG; CD227; EMA; MAM6; PEMT; PUM; ENSG00000185499; 4582                     |



|              |                                                                                 |      |    |                 |     |  |                                                     |                            |      |     |      |                                      |  |                                                                 |
|--------------|---------------------------------------------------------------------------------|------|----|-----------------|-----|--|-----------------------------------------------------|----------------------------|------|-----|------|--------------------------------------|--|-----------------------------------------------------------------|
| <b>MUTYH</b> | Muty homolog (E. Coli)                                                          | 4595 | 1  | 1p34.3-1p32.1   | yes |  | Colorectal                                          | Adenomatous polyposis coli | E    | Rec | Mis  |                                      |  | MUTYH; MYH; MYHbeta; MGC4416; hMYH; ENSG00000132781; 4595       |
| <b>MYB</b>   | V-myb myeloblastosis viral oncogene homolog                                     | 4602 | 6  | 6q22-23         | yes |  | Adenoid cystic carcinoma                            |                            | E    | Dom | T    | NFIB                                 |  | MYB; c-myb_CDS; c-myb; Cmyb; efg; P10242; ENSG00000118513; 4602 |
| <b>MYC</b>   | V-myc myelocytomatosis viral oncogene homolog (avian)                           | 4609 | 8  | 8q24.12-q24.13  | yes |  | Burkitt lymphoma; amplified in other cancers; B-CLL |                            | L; E | Dom | A; T | IGK@; BCL5; BCL7A ; BTG1; TRA@; IGH@ |  | 4609; c-Myc; ENSG00000136997; MYC                               |
| <b>MYCL1</b> | V-myc myelocytomatosis viral oncogene homolog 1; lung carcinoma derived (avian) | 4610 | 1  | 1p34.3          | yes |  | Small cell lung carcinoma                           |                            | E    | Dom | A    |                                      |  | 4610; LMYC; MYCL; ENSG00000116990; MYCL1                        |
| <b>MYCN</b>  | V-myc myelocytomatosis viral related oncogene; neuroblastoma derived (avian)    | 4613 | 2  | 2p24.1          | yes |  | Neuroblastoma                                       |                            | O    | Dom | A    |                                      |  | MYCN; N-myc; ODED; MODED; NMYC; ENSG00000134323; 4613           |
| <b>MYD88</b> | Myeloid differentiation primary response gene (88)                              | 4615 | 3  | 3p22            | yes |  | ABC-DLBCL                                           |                            | L    | Dom | Mis  |                                      |  | Q99836; MYD88_ENST00000396334; 4615; MYD88D                     |
| <b>MYH11</b> | Myosin; heavy polypeptide 11; smooth muscle                                     | 4629 | 16 | 16p13.13-p13.12 | yes |  | AML                                                 |                            | L    | Dom | T    | CBFB                                 |  | MYH11; ENSG00000133392; 4629                                    |

|              |                                                              |       |    |             |     |     |                                                |                            |            |     |           |   |        |     |                                                                                                               |                                                                                                     |
|--------------|--------------------------------------------------------------|-------|----|-------------|-----|-----|------------------------------------------------|----------------------------|------------|-----|-----------|---|--------|-----|---------------------------------------------------------------------------------------------------------------|-----------------------------------------------------------------------------------------------------|
| <b>MYH9</b>  | Myosin; heavy polypeptide 9; non-muscle                      | 4627  | 22 | 22q13.1     | yes |     | ALCL                                           |                            |            | L   | Dom       | T | ALK    | yes | Deafness; autosomal dominant 17; Epstein syndrome; Fechtner syndrome; May-Hegglin anomaly; Sebastian syndrome | 4627; P35579; DFNA17; ENSG00000100345; MYH9                                                         |
| <b>MYST4</b> | MYST histone acetyltransferase (monocytic leukemia) 4 (MORF) | 23522 | 10 | 10q22       | yes |     | AML                                            |                            |            | L   | Dom       | T | CREBBP |     |                                                                                                               | 23522; ENSG00000156650; DKFZp313G1618; FLJ90335; KIAA0383; MORF; MOZ2; qkf; querkopf; Q8WYB5; MYST4 |
| <b>NACA</b>  | Nascent-polypeptide-associated complex alpha polypeptide     | 4666  | 12 | 12q23-q24.1 | yes |     | NHL                                            |                            |            | L   | Dom       | T | BCL6   |     |                                                                                                               | 4666; NACAP1; FKSG17; Q13765; NACA1; ENSG00000196531; NACA; HSD48; MGC117224                        |
| <b>NBS1</b>  | Nijmegen breakage syndrome 1 (nibrin)                        | 4683  | 8  | 8q21        |     | yes | NHL; glioma; medulloblastoma; rhabdomyosarcoma | Nijmegen breakage syndrome | L; E; M; O | Rec | Mis; N; F |   |        |     |                                                                                                               | NBN; AT-V2; NBS1; MGC87362; AT-V1; NBS; FLJ10155; ATV; ENSG00000104320; 4683                        |

|               |                                                    |       |    |         |     |     |                                     |                              |                          |   |     |                    |               |  |                                                                                                                    |
|---------------|----------------------------------------------------|-------|----|---------|-----|-----|-------------------------------------|------------------------------|--------------------------|---|-----|--------------------|---------------|--|--------------------------------------------------------------------------------------------------------------------|
| <b>NCOA1</b>  | Nuclear receptor coactivator 1                     | 8648  | 2  | 2p23    | yes |     | Alveolar rhabdomyosarcoma           |                              |                          | M | Dom | T                  | PAX3          |  | NCOA1; RIP160; F-SRC-1; MGC129720; MGC129719; NCoA-1; SRC1; ENSG0000084676; 8648                                   |
| <b>NCOA2</b>  | Nuclear receptor coactivator 2 (TIF2)              | 10499 | 8  | 8q13.1  | yes |     | AML; chondrosarcoma                 |                              |                          | L | Dom | T                  | RUNXBP2; HEY1 |  | 10499; TIF2; GRIP1; MGC138808; NCoA-2; ENSG00000140396; NCOA2                                                      |
| <b>NCOA4</b>  | Nuclear receptor coactivator 4 - PTC3 (ELE1)       | 8031  | 10 | 10q11.2 | yes |     | Papillary thyroid                   |                              |                          | E | Dom | T                  | RET           |  | 8031; RP11-481A12.4; ARA70; DKFZp762E1112; RFG; Q13772; ELE1; PTC3; ENSG00000138293; NCOA4                         |
| <b>NDRG1</b>  | N-myc downstream regulated 1                       | 10397 | 8  | 8q24.3  | yes |     | Prostate                            |                              |                          | E | Dom | T                  | ERG           |  | NDRG1; NDR1; CAP43; NMSL; PROXY1; TDD5; DRG1; RTP; GC4; HMSNL; TARG1; CMT4D; RIT42; Q92597; ENSG00000104419; 10397 |
| <b>NF1</b>    | Neurofibromatosis type 1 gene                      | 4763  | 17 | 17q12   | yes | yes | Neurofibroma; glioma                | Neurofibroma; glioma         | Neurofibromatosis type 1 | O | Rec | D; Mis; N; F; S; O |               |  | 4763; NFNS; P21359; ENSG00000196712; NF1                                                                           |
| <b>NF2</b>    | Neurofibromatosis type 2 gene                      | 4771  | 22 | 22q12.2 | yes | yes | Meningioma; acoustic neuroma; renal | Meningioma; acoustic neuroma | Neurofibromatosis type 2 | O | Rec | D; Mis; N; F; S; O |               |  | SCH; ACN; Merlin; P35240; ENSG00000186575; 4771; NF2; BANF                                                         |
| <b>NFE2L2</b> | Nuclear factor (erythroid-derived 2)-like 2 (NRF2) | 4780  | 2  | 2q31    | yes |     | NSCLC; HNSCC                        |                              |                          | E | Dom | Mis                |               |  | 4780; ENSG00000116044; NRF2; Q16236; NFE2L2                                                                        |

|               |                                                                                 |       |    |          |     |  |                                  |  |  |   |     |           |                 |  |                                                                                               |
|---------------|---------------------------------------------------------------------------------|-------|----|----------|-----|--|----------------------------------|--|--|---|-----|-----------|-----------------|--|-----------------------------------------------------------------------------------------------|
| <b>NFIB</b>   | Nuclear factor I/B                                                              | 4781  | 9  | 9p24.1   | yes |  | Adenoid cystic carcinoma; lipoma |  |  | E | Dom | T         | MYB; HGMA2      |  | 4781; RP11-280024_2; NFIB3; NFI-RED; NFIB2; ENSG00000147862; NFIB                             |
| <b>NFKB2</b>  | Nuclear factor of kappa light polypeptide gene enhancer in B-cells 2 (p49/p100) | 4791  | 10 | 10q24    | yes |  | B-NHL                            |  |  | L | Dom | T         | IGH@            |  | LYT10; ENSG00000077150; NFKB2; 4791; LYT-10                                                   |
| <b>NIN</b>    | Ninein (GSK3B interacting protein)                                              | 51199 | 14 | 14q24    | yes |  | MPN                              |  |  | L | Dom | T         | PDGFRB          |  | 51199; KIAA1565; ENSG00000100503; NIN                                                         |
| <b>NKX2-1</b> | NK2 homeobox 1                                                                  | 7080  | 14 | 14q13    | yes |  | NSCLC                            |  |  | E | Dom | A         |                 |  | TTF-1; BCH; NK-2; NKX2_1; NKX2A; BHC; TTF1; TITF1; P43699; ENSG00000136352; TITF1; 7080; TEBP |
| <b>NONO</b>   | Non-POU domain containing; octamer-binding                                      | 4841  | X  | Xq13.1   | yes |  | Papillary renal                  |  |  | E | Dom | T         | TFE3            |  | 4841; Q15233; P54; NMT55; P54NRB; NRB54; ENSG00000147140; NONO                                |
| <b>NOTCH1</b> | Notch homolog 1; translocation-associated (Drosophila) (TAN1)                   | 4851  | 9  | 9q34.3   | yes |  | T-ALL                            |  |  | L | Dom | T; Mis; O | TRB@            |  | NOTCH1; hN1; ENSG00000148400; 4851; P46531; TAN1                                              |
| <b>NOTCH2</b> | Notch homolog 2                                                                 | 4853  | 1  | 1p13-p11 | yes |  | Marginal zone lymphoma; DLBCL    |  |  | L | Dom | N; F; Mis |                 |  | 4853; Q04721; hN2; AGS2; ENSG00000134250; NOTCH2                                              |
| <b>NPM1</b>   | Nucleophosmin (nucleolar phosphoprotein B23; numatrin)                          | 4869  | 5  | 5q35     | yes |  | NHL; APL; AML                    |  |  | L | Dom | T; F      | ALK; RARA; MLF1 |  | NPM1; NPM; MGC104254; B23; ENSG00000181163; P06748; 4869                                      |

|               |                                                             |       |    |              |     |  |                                                     |  |  |      |     |     |                   |     |                       |                                                                                                           |
|---------------|-------------------------------------------------------------|-------|----|--------------|-----|--|-----------------------------------------------------|--|--|------|-----|-----|-------------------|-----|-----------------------|-----------------------------------------------------------------------------------------------------------|
| <b>NR4A3</b>  | Nuclear receptor subfamily 4; group A; member 3 (NOR1)      | 8013  | 9  | 9q22         | yes |  | Extraskeleta<br>l myxoid<br>chondrosarc<br>oma      |  |  | M    | Dom | T   | EWSR1             |     |                       | NR4A3; MINOR;<br>CSMF; NOR1; TEC;<br>CHN; Q92570;<br>ENSG00000119508;<br>8013                             |
| <b>NRAS</b>   | Neuroblastom<br>a RAS viral (v-<br>ras) oncogene<br>homolog | 4893  | 1  | 1p13.2       | yes |  | Melanoma;<br>MM; AML;<br>thyroid                    |  |  | L; E | Dom | Mis |                   |     |                       | N-ras; NRAS1; P01111;<br>ENSG00000213281;<br>4893; NRAS                                                   |
| <b>NSD1</b>   | Nuclear<br>receptor<br>binding SET<br>domain<br>protein 1   | 64324 | 5  | 5q35         | yes |  | AML                                                 |  |  | L    | Dom | T   | NUP98             | yes | Sotos<br>Syndrom<br>e | 64324; FLJ44628; STO;<br>ARA267;<br>DKFZp666C163;<br>FLJ22263; Q96L73;<br>ENSG00000165671;<br>NSD1; SOTOS |
| <b>NT5C2</b>  | 5'-<br>Nucleotidase;<br>cytosolic II                        | 22978 | 10 | 10q24.<br>32 | yes |  | Relapse<br>ALL                                      |  |  | L    |     | Mis |                   |     |                       | 22978;<br>ENSG00000076685; cN<br>II; GMP; NT5B; PNT5;<br>P49902; NT5C2                                    |
| <b>NTRK1</b>  | Neurotrophic<br>tyrosine<br>kinase;<br>receptor; type<br>1  | 4914  | 1  | 1q21-<br>q22 | yes |  | Papillary<br>thyroid                                |  |  | E    | Dom | T   | TPM3;<br>TPR; TFG |     |                       | DKFZp781I14186;<br>ENSG00000198400;<br>TRK; TRKA; p140-<br>TrkA; MTC; TRK1;<br>P04629; NTRK1; 4914        |
| <b>NTRK3</b>  | Neurotrophic<br>tyrosine<br>kinase;<br>receptor; type<br>3  | 4916  | 15 | 15q25        | yes |  | Congenital<br>fibrosarcom<br>a; secretory<br>breast |  |  | E; M | Dom | T   | ETV6              |     |                       | Q16288; TRKC;<br>gp145(trkC);<br>ENSG00000140538;<br>4916; NTRK3                                          |
| <b>NUMA1</b>  | Nuclear<br>mitotic<br>apparatus<br>protein 1                | 4926  | 11 | 11q13        | yes |  | APL                                                 |  |  | L    | Dom | T   | RARA              |     |                       | NUMA; Q14980;<br>ENSG00000137497;<br>4926; NUMA1                                                          |
| <b>NUP214</b> | Nucleoporin<br>214 kDa<br>(CAN)                             | 8021  | 9  | 9q34.1       | yes |  | AML; T-<br>ALL                                      |  |  | L    | Dom | T   | DEK; SET;<br>ABL1 |     |                       | NUP214;<br>ENSG00000126883;<br>CAN; P35658; CAIN;<br>N214; RP11-<br>544A12_7; D9S46E;<br>MGC104525; 8021  |

|               |                                                                  |        |      |                       |     |  |                                                 |  |  |   |     |   |                                                                                                                             |  |                                                                                   |
|---------------|------------------------------------------------------------------|--------|------|-----------------------|-----|--|-------------------------------------------------|--|--|---|-----|---|-----------------------------------------------------------------------------------------------------------------------------|--|-----------------------------------------------------------------------------------|
| <b>NUP98</b>  | Nucleoporin<br>98 kDa                                            | 4928   | 11   | 11p15                 | yes |  | AML                                             |  |  | L | Dom | T | HOXA9;<br>NSD1;<br>WHSC1L1;<br>DDX10;<br>TOP1;<br>HOXD13;<br>PMX1;<br>HOXA13;<br>HOXD11;<br>HOXA11;<br>RAP1GDS1<br>; HOXC11 |  | NUP196;<br>ENSG00000110713;<br>ADIR2; 4928; NUP98                                 |
| <b>NUTM2A</b> | NUT family<br>member 2A                                          | 728118 | 10   | 10q23.<br>2           | yes |  | Endometrial<br>stromal<br>sarcoma               |  |  | M | Dom | T | YWHAE                                                                                                                       |  | KIAA2020; NUTM2A;<br>ENSG00000184923;<br>FAM22A; 728118;<br>Q8IVF1; Q5VT03        |
| <b>NUTM2B</b> | NUT family<br>member 2B                                          | 729262 | 10   | 10q22.<br>3           | yes |  | Endometrial<br>stromal<br>sarcoma               |  |  | M | Dom | T | YWHAE                                                                                                                       |  | A6NNL0; NUTM2B;<br>FAM22B                                                         |
| <b>OLIG2</b>  | Oligodendrocyte lineage<br>transcription<br>factor 2<br>(BHLHB1) | 10215  | 21   | 21q22.<br>11          | yes |  | T-ALL                                           |  |  | L | Dom | T | TRA@                                                                                                                        |  | OLIG2; OLIGO2;<br>PRKCBP2; RACK17;<br>BHLHB1;<br>ENSG00000205927;<br>10215        |
| <b>OMD</b>    | Osteomodulin                                                     | 4958   | 9    | 9q22.3<br>1           | yes |  | Aneurysmal<br>bone cyst                         |  |  | M | Dom | T | USP6                                                                                                                        |  | OMD; osteoadherin;<br>SLRR2C; Q99983;<br>ENSG00000127083;<br>4958                 |
| <b>P2RY8</b>  | Purinergic<br>receptor P2Y;<br>G-protein<br>coupled; 8           | 286530 | X; Y | Xp22.3<br>;<br>Yp11.3 | yes |  | B-ALL;<br>Down<br>syndrome<br>associated<br>ALL |  |  | L | Dom | T | CRLF2                                                                                                                       |  | 286530; RP11-<br>261P4_4; Q86VZ1;<br>P2Y8; MGC50878;<br>ENSG00000182162;<br>P2RY8 |

|                 |                                                                             |       |    |               |     |     |                                    |                                            |                                                 |         |     |                    |                                     |     |                                                           |                                                                                                             |
|-----------------|-----------------------------------------------------------------------------|-------|----|---------------|-----|-----|------------------------------------|--------------------------------------------|-------------------------------------------------|---------|-----|--------------------|-------------------------------------|-----|-----------------------------------------------------------|-------------------------------------------------------------------------------------------------------------|
| <b>PAFAH1B2</b> | Platelet-activating factor acetylhydrolase; isoform Ib; beta subunit 30 kDa | 5049  | 11 | 11q23         | yes |     | MLCLS                              |                                            |                                                 | L       | Dom | T                  | IGH@                                |     |                                                           | 5049; P68402; ENSG00000168092; PAFAH1B2                                                                     |
| <b>PALB2</b>    | Partner and localizer of BRCA2                                              | 79728 | 16 | 16p12.1       |     | yes |                                    | Wilms tumour; medulloblastoma; AML; breast | Fanconi anaemia N; breast cancer susceptibility | L; O; E | Rec | F; N; Mis          |                                     |     |                                                           | 79728; ENSG00000083093; PALB2                                                                               |
| <b>PAX3</b>     | Paired box gene 3                                                           | 5077  | 2  | 2q35          | yes |     | Alveolar rhabdomyosarcoma          |                                            |                                                 | M       | Dom | T                  | FOXO1A; NCOA1                       | yes | Waardenburg syndrome; craniofacial-deafness-hand syndrome | 5077; MGC120382; MGC120381; MGC134778; MGC120384; WS1; P23760; HUP2; MGC120383; CDHS; ENSG00000135903; PAX3 |
| <b>PAX5</b>     | Paired box gene 5 (B-cell lineage specific activator protein)               | 5079  | 9  | 9p13          | yes |     | NHL; ALL; B-ALL                    |                                            |                                                 | L       | Dom | T; Mis; D; F; S    | IGH@; ETV6; PML; FOXP1; ZNF521; ELN |     |                                                           | PAX5; Q02548; BSAP; ENSG00000196092; 5079                                                                   |
| <b>PAX7</b>     | Paired box gene 7                                                           | 5081  | 1  | 1p36.2-p36.12 | yes |     | Alveolar rhabdomyosarcoma          |                                            |                                                 | M       | Dom | T                  | FOXO1A                              |     |                                                           | PAX7; PAX7B; HUP1; P23759; ENSG0000009709; 5081                                                             |
| <b>PAX8</b>     | Paired box gene 8                                                           | 7849  | 2  | 2q12-q14      | yes |     | Follicular thyroid                 |                                            |                                                 | E       | Dom | T                  | PPARG                               | yes | Thyroid dysgenesiss                                       | 7849; ENSG00000125618; PAX8                                                                                 |
| <b>PBRM1</b>    | Polybromo 1                                                                 | 55193 | 3  | 3p21          | yes |     | Clear cell renal carcinoma; breast |                                            |                                                 | E       | Rec | Mis; N; F; S; D; O |                                     |     |                                                           | 55193; BAF180; MGC156155; MGC156156; PB1; PBRM1                                                             |
| <b>PBX1</b>     | Pre-B-cell leukemia transcription factor 1                                  | 5087  | 1  | 1q23          | yes |     | Pre B-ALL; myoepithelioma          |                                            |                                                 | L; M    | Dom | T                  | TCF3; EWSR1                         |     |                                                           | PBX1; P40424; 5087                                                                                          |

|                |                                                                                                 |      |    |               |     |  |                                                                      |  |  |         |     |           |                                                        |  |                                                                                         |
|----------------|-------------------------------------------------------------------------------------------------|------|----|---------------|-----|--|----------------------------------------------------------------------|--|--|---------|-----|-----------|--------------------------------------------------------|--|-----------------------------------------------------------------------------------------|
| <b>PCM1</b>    | Pericentriolar material 1 (PTC4)                                                                | 5108 | 8  | 8p22-p21.3    | yes |  | Papillary thyroid; CML; MPN                                          |  |  | E; L    | Dom | T         | RET; JAK2                                              |  | Q15154; PCM1; 5108; ENSG00000078674; PTC4                                               |
| <b>PCSK7</b>   | Proprotein convertase subtilisin/kexin type 7                                                   | 9159 | 11 | 11q23.3       | yes |  | MLCLS                                                                |  |  | L       | Dom | T         | IGH@                                                   |  | 9159; LPC; Q16549; PC7; PC8; ENSG00000160613; PCSK7                                     |
| <b>PDE4DIP</b> | Phosphodiesterase 4D interacting protein (myomegalin)                                           | 9659 | 1  | 1q12          | yes |  | MPN                                                                  |  |  | L       | Dom | T         | PDGFRB                                                 |  | 9659; ENSG00000178104; PDE4DIP                                                          |
| <b>PDGFB</b>   | Platelet-derived growth factor beta polypeptide (simian sarcoma viral (v-sis) oncogene homolog) | 5155 | 22 | 22q12.3-q13.1 | yes |  | DFSP                                                                 |  |  | M       | Dom | T         | COL1A1                                                 |  | 5155; SIS; SSV; c-sis; P01127; PDGF2; FLJ12858; PDGFB; ENSG00000100311                  |
| <b>PDGFRA</b>  | Platelet-derived growth factor; a-receptor                                                      | 5156 | 4  | 4q11-q13      | yes |  | GIST; idiopathic hypereosinophilic syndrome; paediatric glioblastoma |  |  | L; M; O | Dom | Mis; O; T | FIP1L1                                                 |  | PDGFRA; MGC74795; P16234; CD140a; Rhe-PDGFR; CD140A; PDGFR2; ENSG00000134853; 5156      |
| <b>PDGFRB</b>  | Platelet-derived growth factor receptor; beta polypeptide                                       | 5159 | 5  | 5q31-q32      | yes |  | MPN; AML; CMML; CML                                                  |  |  | L       | Dom | T         | ETV6; TRIP11; HIP1; RAB5EP; H4; NIN; HCMOGT-1; PDE4DIP |  | 5159; JTK12; CD140b; PDGFR; CD140B; PDGFR1; PDGFR-beta; ENSG00000113721; P09619; PDGFRB |
| <b>PER1</b>    | Period homolog 1 (Drosophila)                                                                   | 5187 | 17 | 17p13.1-17p12 | yes |  | AML; CMML                                                            |  |  | L       | Dom | T         | ETV6                                                   |  | 5187; O15534; RIGUI; PER; ENSG00000179094; PER1                                         |



|               |                                                               |       |    |        |     |     |                                           |               |                        |      |     |                   |                             |     |                                                                               |
|---------------|---------------------------------------------------------------|-------|----|--------|-----|-----|-------------------------------------------|---------------|------------------------|------|-----|-------------------|-----------------------------|-----|-------------------------------------------------------------------------------|
| <b>PHF6</b>   | PHD finger protein 6                                          | 84295 | X  | Xq26.3 | yes |     | ETP ALL                                   |               |                        | L    | Rec | F; N; Splice; Mis |                             |     | 84295; BORJ; MGC14797; ENSG00000156531; PHF6                                  |
| <b>PHOX2B</b> | Paired-like homeobox 2b                                       | 8929  | 4  | 4p12   | yes | yes | Neuroblastoma                             | Neuroblastoma | Familial neuroblastoma | O    | Rec | Mis; F            |                             | yes | congenital central hypoventilation syndrome<br>8929; PHOX2B                   |
| <b>PICALM</b> | Phosphatidylinositol binding clathrin assembly protein (CALM) | 8301  | 11 | 11q14  | yes |     | TALL; AML;                                |               |                        | L    | Dom | T                 | MLLT10; MLL                 |     | PICALM; CLTH; Q13492; CALM; ENSG00000073921; 8301                             |
| <b>PIK3CA</b> | Phosphoinositide-3-kinase; catalytic; alpha polypeptide       | 5290  | 3  | 3q26.3 | yes |     | Colorectal; gastric; glioblastoma; breast |               |                        | E; O | Dom | Mis               |                             |     | PIK3CA; MGC142161; p110-alpha; PI3K; MGC142163; ENSG00000121879; P42336; 5290 |
| <b>PIK3R1</b> | Phosphoinositide-3-kinase; regulatory subunit 1 (alpha)       | 5295  | 5  | 5q13.1 | yes |     | Glioblastoma; ovarian; colorectal         |               |                        | E; O | Rec | Mis; F; O         |                             |     | p85-ALPHA; P27986; ENSG00000145675; PIK3R1; 5295; GRB1                        |
| <b>PIM1</b>   | Pim-1 oncogene                                                | 5292  | 6  | 6p21.2 | yes |     | NHL                                       |               |                        | L    | Dom | T                 | BCL6                        |     | 5292; PIM; P11309; PIM1; ENSG00000137193                                      |
| <b>PLAG1</b>  | Pleiomorphic adenoma gene 1                                   | 5324  | 8  | 8q12   | yes |     | Salivary adenoma                          |               |                        | E    | Dom | T                 | TCEA1; LIFR; CTNNB1; CHCHD7 |     | PLAG1; ENSG00000181690; 5324                                                  |
| <b>PML</b>    | Promyelocytic leukemia                                        | 5371  | 15 | 15q22  | yes |     | APL; ALL                                  |               |                        | L    | Dom | T                 | RARA; PAX5                  |     | PML; TRIM19; RNF71; MYL; ENSG00000140464; 5371; PP8675                        |

|                |                                                                  |       |    |          |     |     |         |                                                           |                                                             |   |     |           |       |  |                                                                                                |
|----------------|------------------------------------------------------------------|-------|----|----------|-----|-----|---------|-----------------------------------------------------------|-------------------------------------------------------------|---|-----|-----------|-------|--|------------------------------------------------------------------------------------------------|
| <b>PMS1</b>    | PMS1 postmeiotic segregation increased 1 (S. <i>Cerevisiae</i> ) | 5378  | 2  | 2q31-q33 |     | yes |         | Colorectal; endometrial; ovarian                          | Hereditary non-polyposis colorectal cancer                  | E | Rec | Mis; N    |       |  | DKFZp781M0253; hPMS1; HNPCC3; PMSL1; ENSG00000064933; PMS1; 5378                               |
| <b>PMS2</b>    | PMS2 postmeiotic segregation increased 2 (S. <i>Cerevisiae</i> ) | 5395  | 7  | 7p22     |     | yes |         | Colorectal; endometrial; ovarian; medulloblastoma; glioma | Hereditary non-polyposis colorectal cancer; Turcot syndrome | E | Rec | Mis; N; F |       |  | PMS2; HNPCC4; PMS2CL; PMSL2; H_DJ0042M02_9; ENSG00000122512; 5395                              |
| <b>PMX1</b>    | Paired mesoderm homeo box 1                                      | 5396  | 1  | 1q24     | yes |     | AML     |                                                           |                                                             | L | Dom | T         | NUP98 |  | 5396; ENSG00000116132; PRRX1                                                                   |
| <b>PNUTL1</b>  | Peanut-like 1 (Drosophila)                                       | 5413  | 22 | 22q11.2  | yes |     | AML     |                                                           |                                                             | L | Dom | T         | MLL   |  | 5413; HCDCREL-1; H5; PNUTL1; Q99719; ENSG00000184702; SEPT5                                    |
| <b>POT1</b>    | Protection of telomeres 1                                        | 25913 | 7  | 7q31.33  | yes |     | CLL     |                                                           |                                                             | L |     | Mis; N    |       |  | DKFZP586D211; DKFZp586D211; hPot1; ENSG00000128513; 25913; POT1                                |
| <b>POU2AF1</b> | POU domain; class 2; associating factor 1 (OBF1)                 | 5450  | 11 | 11q23.1  | yes |     | NHL     |                                                           |                                                             | L | Dom | T         | BCL6  |  | 5450; OBF1; OBF-1; Q16633; OCAB; BOB1; ENSG00000110777; POU2AF1                                |
| <b>POU5F1</b>  | POU domain; class 5; transcription factor 1                      | 5460  | 6  | 6p21.31  | yes |     | Sarcoma |                                                           |                                                             | M | Dom | T         | EWSR1 |  | OTF3C; MGC22487; OTF3; OCT3; OCT4; Oct4; OTF3P1; POU5F1P1; ENSG00000230336; POU5F1; 5460; OTF4 |

|                |                                                           |       |    |             |     |  |                              |  |  |   |      |                 |      |     |                                                                                                                                         |                                                                                                                |
|----------------|-----------------------------------------------------------|-------|----|-------------|-----|--|------------------------------|--|--|---|------|-----------------|------|-----|-----------------------------------------------------------------------------------------------------------------------------------------|----------------------------------------------------------------------------------------------------------------|
| <b>PPARG</b>   | Peroxisome proliferative activated receptor; gamma        | 5468  | 3  | 3p25        | yes |  | Follicular thyroid           |  |  | E | Dom  | T               | PAX8 | yes | Insulin resistance ; lipodystrophy; familial partial L;diabetes mellitus; insulin-resistant; with acanthosis nigricans and hypertension | HUMPPARG; PPARG1; NR1C3; PPARG2; ENSG00000132170; 5468; PPARG                                                  |
| <b>PPP2R1A</b> | Protein phosphatase 2; regulatory subunit A; alpha        | 5518  | 19 | 19q13.41    | yes |  | Clear cell ovarian carcinoma |  |  | E | Dom? | Mis             |      |     |                                                                                                                                         | MGC786; PR65A; P30153; ENSG00000105568; PPP2R1A; 5518                                                          |
| <b>PRCC</b>    | Papillary renal cell carcinoma (translocation-associated) | 5546  | 1  | 1q21.1      | yes |  | Papillary renal              |  |  | E | Dom  | T               | TFE3 |     |                                                                                                                                         | Q92733; PRCC; 5546; ENSG00000143294; MGC17178; MGC4723; RCCP1; TPRC                                            |
| <b>PRDM1</b>   | PR domain containing 1; with ZNF domain                   | 639   | 6  | 6q21        | yes |  | DLBCL                        |  |  | L | Rec  | D; N; Mis; F; S |      |     |                                                                                                                                         | PRDM1; O75626; BLIMP1; MGC118923; RP1-134E15_1; MGC118922; MGC118924; PRDIBF1; MGC118925; ENSG00000057657; 639 |
| <b>PRDM16</b>  | PR domain containing 16                                   | 63976 | 1  | 1p36.23-p33 | yes |  | MDS; AML                     |  |  | L | Dom  | T               | EVII |     |                                                                                                                                         | KIAA1675; Q9HAZ2; PFM13; MEL1; ENSG00000142611; 63976; PRDM16                                                  |

|                |                                                                                            |       |    |           |     |     |                                  |                                           |                                                    |            |          |                 |       |                                                    |                                                                                                                  |
|----------------|--------------------------------------------------------------------------------------------|-------|----|-----------|-----|-----|----------------------------------|-------------------------------------------|----------------------------------------------------|------------|----------|-----------------|-------|----------------------------------------------------|------------------------------------------------------------------------------------------------------------------|
| <b>PRF1</b>    | Perforin 1 (pore forming protein)                                                          | 5551  | 10 | 10q22     |     | yes |                                  | Various leukaemia; lymphoma               |                                                    | L          | Rec      | M               |       | Type 2 familial hemophagocytic lymphohistiocytosis | P14222; PRF1; 5551; ENSG00000180644; FLH2; HPLH2; MGC65093; P1; PFP                                              |
| <b>PRKAR1A</b> | Protein kinase; camp-dependent; regulatory; type I; alpha (tissue specific extinguisher 1) | 5573  | 17 | 17q23-q24 | yes | yes | Papillary thyroid                | Myxoma; endocrine; papillary thyroid      | Carney complex                                     | E; M       | Dom; Rec | T; Mis; N; F; S | RET   |                                                    | PPNAD1; CAR; CNC; TSE1; MGC17251; PKR1; CNC1; P10644; PRKAR1; PRKAR1A; ENSG00000108946; 5573; DKFZp779L0468      |
| <b>PSIP1</b>   | PC4 and SFRS1 interacting protein 1 (LEDGF)                                                | 11168 | 9  | 9p22.3    | yes |     | AML                              |                                           |                                                    | L          | Dom      | T               | NUP98 |                                                    | PSIP1; PSIP2; ENSG00000164985; 11168                                                                             |
| <b>PTCH</b>    | Homolog of Drosophila Patched gene                                                         | 5727  | 9  | 9q22.3    | yes | yes | Skin basal cell; medulloblastoma | Skin basal cell; medulloblastoma          | Nevoid basal cell carcinoma syndrome               | E; M       | Rec      | Mis; N; F; S    |       |                                                    | Q13635; RP11-435O5_3; FLJ42602; PTCH1; ENSG00000185920; PTC; PTC1; BCNS; NBCCS; FLJ26746; HPE7; PTCH; 5727; PTCH |
| <b>PTEN</b>    | Phosphatase and tensin homolog gene                                                        | 5728  | 10 | 10q23.3   | yes | yes | Glioma; prostate; endometrial    | Harmartoma; glioma; prostate; endometrial | Cowden syndrome; Bannayan-Riley-Ruvalcaba syndrome | L; E; M; O | Rec      | D; Mis; N; F; S |       |                                                    | P60484; MMAC1; ENSG00000171862; BZS; PTEN1; TEP1; MGC11227; PTEN; 5728; MHAM                                     |

|                |                                                                                         |      |    |             |     |  |                                    |  |  |      |     |           |        |     |                              |                                                                                                                |
|----------------|-----------------------------------------------------------------------------------------|------|----|-------------|-----|--|------------------------------------|--|--|------|-----|-----------|--------|-----|------------------------------|----------------------------------------------------------------------------------------------------------------|
| <b>PTPN11</b>  | Protein tyrosine phosphatase; non-receptor type 11                                      | 5781 | 12 | 12q24.1     | yes |  | JMML; AML; MDS                     |  |  | L    | Dom | Mis       |        | yes | Noonan Syndrome              | SH-PTP2; PTP2C; NS1; SH-PTP3; PTP-1D; BPTP3; SHP-2; MGC14433; SHP2; ENSG00000179295; PTPN11; 5781; Q06124; CFC |
| <b>PTPRC</b>   | Protein tyrosine phosphatase; receptor type; C                                          | 5788 | 1  | 1q31-q32    | yes |  | T-ALL                              |  |  | L    |     |           |        |     |                              | PTPRC; CD45; LY5; B220; GP180; T200; ENSG00000081237; 5788; LCA                                                |
| <b>RAB5EP</b>  | Rabaptin; RAB gtpase binding effector protein 1 (RABPT5)                                | 9135 | 17 | 17p13       | yes |  | CMML                               |  |  | L    | Dom | T         | PDGFRB |     |                              | 9135; Q15276; rabaptin-5; RABPT5; neurocrescin; RAB5EP; ENSG00000029725; RABEP1                                |
| <b>RAC1</b>    | Ras-related C3 botulinum toxin substrate 1 (rho family; small GTP binding protein Rac1) | 5879 | 7  | 7p22        | yes |  | Melanoma; carcinoma                |  |  | E    | Dom | Mis; F    |        |     |                              | MIG5; ENSG00000136238; TC-25; p21-Rac1; P63000; MGC111543; RAC1; 5879                                          |
| <b>RAD21</b>   | RAD21 homolog (S. Pombe)                                                                | 5885 | 8  | q24.11      | yes |  | AML; endometrium; colorectal; lung |  |  | L; E | Rec | Mis; N; F |        |     | Cornelia de Lange syndrome-4 | RAD21; HR21; SCC1; FLJ40596; HRAD21; NXP1; O60216; MCD1; hHR21; KIAA0078; ENSG00000164754; 5885; FLJ25655      |
| <b>RAD51L1</b> | RAD51-like 1 (S. Cerevisiae) (RAD51B)                                                   | 5890 | 14 | 14q23-q24.2 | yes |  | Lipoma; uterine leiomyoma          |  |  | M    | Dom | T         | HMGA2  |     |                              | RAD51L1; ENSG00000182185; MGC34245; RAD51B; REC2; R51H2; hREC2; O15315; 5890; RAD51L1                          |

|                 |                                                  |       |    |          |     |     |                                                            |                                                            |                            |            |     |                 |                                |  |                                                                     |
|-----------------|--------------------------------------------------|-------|----|----------|-----|-----|------------------------------------------------------------|------------------------------------------------------------|----------------------------|------------|-----|-----------------|--------------------------------|--|---------------------------------------------------------------------|
| <b>RAF1</b>     | V-raf-1 murine leukemia viral oncogene homolog 1 | 5894  | 3  | 3p25     | yes |     | Pilocytic astrocytoma                                      |                                                            |                            | M          | Dom | T               | SRGAP3                         |  | RAF1; Raf-1; CRAF; c-Raf; ENSG00000132155; P04049; 5894             |
| <b>RALGDS</b>   | Ral guanine nucleotide dissociation stimulator   | 5900  | 9  | 9q34.3   | yes |     | PMBL; Hodgkin lymphoma;                                    |                                                            |                            | L          | Dom | T               | CIITA                          |  | 5900; FLJ20922; Q12967; RGF; RalGEF; RALGDS; ENSG00000160271        |
| <b>RANBP17</b>  | RAN binding protein 17                           | 64901 | 5  | 5q34     | yes |     | ALL                                                        |                                                            |                            | L          | Dom | T               |                                |  |                                                                     |
| <b>RAP1GDS1</b> | RAP1; GTP-GDP dissociation stimulator 1          | 5910  | 4  | 4q21-q25 | yes |     | T-ALL                                                      |                                                            |                            | L          | Dom | T               | NUP98                          |  | MGC118861; P52306; ENSG00000138698; GDS1; MGC118859; 5910; RAP1GDS1 |
| <b>RARA</b>     | Retinoic acid receptor; alpha                    | 5914  | 17 | 17q12    | yes |     | APL                                                        |                                                            |                            | L          | Dom | T               | PML; ZNF145; TIF1; NUMA1; NPM1 |  | RARA; RAR; NR1B1; ENSG00000131759; 5914                             |
| <b>RB1</b>      | Retinoblastoma gene                              | 5925  | 13 | 13q14    | yes | yes | Retinoblastoma; sarcoma; breast; small cell lung carcinoma | Retinoblastoma; sarcoma; breast; small cell lung carcinoma | familial retinoblastoma    | L; E; M; O | Rec | D; Mis; N; F; S |                                |  | ENSG00000139687; OSRC; P06400; RB; 5925; RB1                        |
| <b>RBM15</b>    | RNA binding motif protein 15                     | 64783 | 1  | 1p13     | yes |     | Acute megakaryocytic leukaemia                             |                                                            |                            | L          | Dom | T               | MKL1                           |  | RBM15; Q96T37; OTT1; OTT; ENSG00000162775; 64783                    |
| <b>RECQL4</b>   | Recq protein-like 4                              | 9401  | 8  | 8q24.3   |     | yes |                                                            | Osteosarcoma; skin basal cell; skin squamous cell          | Rothmund-Thompson syndrome | M          | Rec | N; F; S         |                                |  | RECQL4; RecQ4; RTS; RECQ4; ENSG00000160957; 9401                    |

|              |                                                            |       |    |          |     |     |                                                               |                                                        |                                    |      |     |              |                                                                             |     |                                          |                                                                                                                   |
|--------------|------------------------------------------------------------|-------|----|----------|-----|-----|---------------------------------------------------------------|--------------------------------------------------------|------------------------------------|------|-----|--------------|-----------------------------------------------------------------------------|-----|------------------------------------------|-------------------------------------------------------------------------------------------------------------------|
| <b>REL</b>   | V-rel reticuloendotheliosis viral oncogene homolog (avian) | 5966  | 2  | 2p13-p12 | yes |     | Hodgkin lymphoma                                              |                                                        |                                    | L    | Dom | A            |                                                                             |     | REL; I-Rel; C-Rel; ENSG00000162924; 5966 |                                                                                                                   |
| <b>RET</b>   | Ret proto-oncogene                                         | 5979  | 10 | 10q11.2  | yes | yes | Medullary thyroid; papillary thyroid; pheochromocytoma; NSCLC | Medullary thyroid; papillary thyroid; pheochromocytoma | multiple endocrine neoplasia 2A/2B | E; O | Dom | T; Mis; N; F | H4; PRKAR1A; NCOA4; PCM1; GOLGA5; TRIM33; KTN1; TRIM27; HOOK3; KIF5B; CCDC6 | yes | Hirschsprung disease                     | RET-ELE1; CDHF12; RET51; MEN2B; PTC; HSCR1; MEN2A; MTC1; ENSG00000165731; P07949; RET; 5979                       |
| <b>RNF43</b> | Ring finger protein 43                                     | 54894 | 17 | q23.2    | yes |     | Cholangiocarcinoma; ovary; pancreas                           |                                                        |                                    | E    | Rec | Mis; N; F; S |                                                                             |     |                                          | 54894; DKFZp781H02126; DKFZp781H0392; FLJ20315; MGC125630; RNF124; URCC; Q68DV7; RNF43                            |
| <b>ROS1</b>  | V-ros UR2 sarcoma virus oncogene homolog 1 (avian)         | 6098  | 6  | 6q22     | yes |     | Glioblastoma; NSCLC                                           |                                                        |                                    | O; E | Dom | T            | GOPC; SDC4; SLC34A2; EZR; LRIG3                                             |     |                                          | 6098; ROS; RP1-179P9_1; MCF3; P08922; ENSG00000047936; ROS1                                                       |
| <b>RPL10</b> | Ribosomal protein L10                                      | 6134  | X  | Xq28     | yes |     | T-ALL                                                         |                                                        |                                    | L    | Dom | Mis          |                                                                             |     |                                          | 6134; XX-FW83563B9_1; FLJ23544; QM; P27635; NOV; DKFZp686J1851; DXS648E; DXS648; FLJ27072; ENSG00000147403; RPL10 |
| <b>RPL22</b> | Ribosomal protein L22 (EAP)                                | 6146  | 1  | 1p36.31  | yes |     | AML; CML                                                      |                                                        |                                    | L    | Dom | T            | RUNX1                                                                       |     |                                          | 6146; EAP; RPL22                                                                                                  |

|                |                                                                  |       |    |              |     |     |                        |                             |  |   |     |                 |                                                 |     |                          |                                                                   |
|----------------|------------------------------------------------------------------|-------|----|--------------|-----|-----|------------------------|-----------------------------|--|---|-----|-----------------|-------------------------------------------------|-----|--------------------------|-------------------------------------------------------------------|
| <b>RPL5</b>    | Ribosomal protein L5                                             | 6125  | 1  | 1p22.1       | yes |     | T-ALL                  |                             |  | L | Dom | Mis; N; F       |                                                 | yes | Diamond-Blackfan anaemia | 6125; RPL5; ENSG00000122406; MGC117339; P46777; MSTP030           |
| <b>RPN1</b>    | Ribophorin I                                                     | 6184  | 3  | 3q21.3-q25.2 | yes |     | AML                    |                             |  | L | Dom | T               | EVII                                            |     |                          | 6184; P04843; OST1; ENSG00000163902; RPN1                         |
| <b>RUNDC2A</b> | RUN domain containing 2A                                         | 84127 | 16 | 16p13.13     | yes |     | PMBL; Hodgkin lymphoma |                             |  | L | Dom | T               | CIITA                                           |     |                          | 84127; ENSG00000140660; FLJ12363; Q9HA26; RUNDC2A                 |
| <b>RUNX1</b>   | Runt-related transcription factor 1 (AML1)                       | 861   | 21 | 21q22.3      | yes |     | AML; preB-ALL; T-ALL   |                             |  | L | Dom | T               | RPL22; MDS1; EVII; CBFA2T3; CBFA2T1; ETV6; LAF4 |     |                          | 861; PEBP2A2; AMLCR1; CBFA2; AML1; Q01196; ENSG00000159216; RUNX1 |
| <b>RUNXBP2</b> | Runt-related transcription factor binding protein 2 (MOZ/ZNF220) | 7994  | 8  | 8p11         | yes |     | AML                    |                             |  | L | Dom | T               | CREBBP; NCOA2; EP300                            |     |                          | ZNF220; Q92794; MOZ; RUNXBP2; ENSG00000083168; MYST3; 7994        |
| <b>SBDS</b>    | Shwachman-Bodian-Diamond syndrome protein                        | 51119 | 7  | 7q11         |     | yes | AML; MDS               | Schwachman-Diamond syndrome |  | L | Rec | Gene Conversion |                                                 |     |                          | SBDS; SDS; SWDS; Q9Y3A5; CGI-97; FLJ10917; ENSG00000126524; 51119 |
| <b>SDC4</b>    | Syndecan 4                                                       | 6385  | 20 | 20q12        | yes |     | NSCLC                  |                             |  | E | Dom | T               | ROS1                                            |     |                          | 6385; ENSG00000124145; MGC22217; SYND4; P31431; SDC4              |
| <b>SDH5</b>    | Chromosome 11 open reading frame 79                              | 54949 | 11 | 11q12.2      |     | yes | Paraganglioma          | familial paraganglioma      |  | M | Rec | M               |                                                 |     |                          | C11orf79; C11orf79; 54949; ENSG00000167985; FLJ20487              |



|               |                                                                               |       |    |            |     |     |                                           |                                  |                           |   |     |              |        |  |                                                                                                |
|---------------|-------------------------------------------------------------------------------|-------|----|------------|-----|-----|-------------------------------------------|----------------------------------|---------------------------|---|-----|--------------|--------|--|------------------------------------------------------------------------------------------------|
| <b>SDHB</b>   | Succinate dehydrogenase complex; subunit B; iron sulfur (Ip)                  | 6390  | 1  | 1p36.1-p35 |     | yes |                                           | Paraganglioma ; pheochromocytoma | familial paraganglioma    | O | Rec | Mis; N; F    |        |  | SDH1; PGL4; IP; SDH; SDHIP; ENSG00000117118; 6390; SDHB                                        |
| <b>SDHC</b>   | Succinate dehydrogenase complex; subunit C; integral membrane protein; 15 kDa | 6391  | 1  | 1q21       |     | yes |                                           | Paraganglioma ; pheochromocytoma | familial paraganglioma    | O | Rec | Mis; N; F    |        |  | SDH3; CYBL; QPS1; PGL3; ENSG00000143252; 6391; SDHC; CYB560                                    |
| <b>SDHD</b>   | Succinate dehydrogenase complex; subunit D; integral membrane protein         | 6392  | 11 | 11q23      |     | yes |                                           | Paraganglioma ; pheochromocytoma | familial paraganglioma    | O | Rec | Mis; N; F; S |        |  | 6392; PGL1; O14521; CBT1; SDH4; PGL; ENSG00000204370; SDHD                                     |
| <b>SEPT6</b>  | Septin 6                                                                      | 23157 | X  | Xq24       | yes |     | AML                                       |                                  |                           | L | Dom | T            | MLL    |  | SEPT6; RP5-876A24_2; KIAA0128; Q14141; ENSG00000125354; 23157; SEPT2; MGC16619; SEP2; MGC20339 |
| <b>SET</b>    | SET translocation                                                             | 6418  | 9  | 9q34       | yes |     | AML                                       |                                  |                           | L | Dom | T            | NUP214 |  | 6418; I2PP2A; 2PP2A; IGAAD; PHAPII; TAF-IBETA; ENSG00000119335; SET                            |
| <b>SETBP1</b> | SET binding protein 1                                                         | 26040 | 18 | 18q21.1    | yes | yes | Atypical CML; sAML; MDS/MPN-U; CMML; JMML | Neuroepithelial tumours          | Schinzel-Giedion syndrome | L | Dom | Mis          | NUP98  |  |                                                                                                |

|               |                                                                                         |       |    |          |     |  |                                  |  |  |   |      |              |      |  |                                                                |                                                                       |
|---------------|-----------------------------------------------------------------------------------------|-------|----|----------|-----|--|----------------------------------|--|--|---|------|--------------|------|--|----------------------------------------------------------------|-----------------------------------------------------------------------|
| <b>SETD2</b>  | SET domain containing 2                                                                 | 29072 | 3  | 3p21.31  | yes |  | Clear cell renal carcinoma       |  |  | E | Rec  | N; F; S; Mis |      |  |                                                                | SETD2; ENSG00000181555; 29072                                         |
| <b>SF3B1</b>  | Splicing factor 3b; subunit 1; 155kda                                                   | 23451 | 2  | 2q33.1   | yes |  | Myelodysplastic syndrome         |  |  | L | Dom  | Mis          |      |  |                                                                | SF3B1; ENSG00000115524; PRPF10; SAP155; SF3b155; 23451; PRP10; O75533 |
| <b>SFPQ</b>   | Splicing factor proline/glutamine rich(polypyrimidine tract binding protein associated) | 6421  | 1  | 1p34.3   | yes |  | Papillary renal                  |  |  | E | Dom  | T            | TFE3 |  |                                                                | 6421; PSF; P23246; ENSG00000116560; SFPQ                              |
| <b>SFRS3</b>  | Splicing factor; arginine/serine rich 3                                                 | 6428  | 6  | 6p21     | yes |  | Follicular lymphoma              |  |  | L | Dom  | T            | BCL6 |  |                                                                | SFRS3; SRP20; ENSG00000112081; P84103; 6428; SFRS3                    |
| <b>SH2B3</b>  | SH2B adaptor protein 3                                                                  | 10019 | 12 | 12q24.12 | yes |  | MPN; sAML; erythrocytosis; B-ALL |  |  | L | Rec? | Mis; F; N    |      |  | Coeliac disease type 13; diabetes mellitus; insulin-dependent; | 10019; LNK; Q9UQQ2; ENSG00000111252; SH2B3                            |
| <b>SH3GL1</b> | SH3-domain GRB2-like 1 (EEN)                                                            | 6455  | 19 | 19p13.3  | yes |  | AL                               |  |  | L | Dom  | T            | MLL  |  |                                                                | SH3GL1; Q99961; SH3P8; CNSA1; EEN; SH3D2B; ENSG00000141985; 6455      |
| <b>SIL</b>    | TAL1 (SCL) interrupting locus                                                           | 6491  | 1  | 1p32     | yes |  | T-ALL                            |  |  | L | Dom  | T            | TAL1 |  |                                                                | 6491; SIL; Q15468; ENSG00000123473; STIL                              |

|                |                                                                                                   |       |    |          |     |     |                    |                    |                                  |   |     |              |                       |  |                                                                                                               |
|----------------|---------------------------------------------------------------------------------------------------|-------|----|----------|-----|-----|--------------------|--------------------|----------------------------------|---|-----|--------------|-----------------------|--|---------------------------------------------------------------------------------------------------------------|
| <b>SLC34A2</b> | Solute carrier family 34 (sodium phosphate); member 2                                             | 10568 | 4  | 4p15.2   | yes |     | NSCLC              |                    |                                  | E | Dom | T            | ROS1                  |  | O95436; SLC34A2; 10568; ENSG00000157765; FLJ90534; NAPI-3B; NAPI-IIb; NPTIIb                                  |
| <b>SLC45A3</b> | Solute carrier family 45; member 3                                                                | 85414 | 1  | 1q32     | yes |     | Prostate           |                    |                                  | E | Dom | T            | ETV1; ETV5; ELK4; ERG |  | 85414; IPCA-6; IPCA6; PCANAP6; PRST; Q96JT2; ENSG00000158715; SLC45A3                                         |
| <b>SMARCA4</b> | SWI/SNF related; matrix associated; actin dependent regulator of chromatin; subfamily a; member 4 | 6597  | 19 | 19p13.2  | yes |     | NSCLC; SCCOHT      |                    |                                  | E | Rec | F; N; Mis; S |                       |  | 6597; hSNF2b; ENSG00000127616; BAF190; SNF2-BETA; SNF2LB; FLJ39786; SWI2; P51532; SMARCA4; SNF2; SNF2L4; BRG1 |
| <b>SMARCB1</b> | SWI/SNF related; matrix associated; actin dependent regulator of chromatin; subfamily b; member 1 | 6598  | 22 | 22q11    | yes | yes | Malignant rhabdoid | Malignant rhabdoid | rhabdoid predisposition syndrome | M | Rec | D; N; F; S   |                       |  | 6598; Ini1; Sfh1p; Q12824; INI1; SNF5; hSNFS; BAF47; RDT; SNF5L1; Snr1; ENSG0000099956; SMARCB1               |
| <b>SMARCE1</b> | SWI/SNF related; matrix associated; actin dependent regulator of chromatin; subfamily e; member 1 | 6605  | 17 | 17q21.2  |     | yes |                    | Meningioma         |                                  | O |     |              |                       |  | 6605; ENSG0000073584; Q969G3; BAF57; SMARCE1                                                                  |
| <b>SMO</b>     | Smoothened homolog (Drosophila)                                                                   | 6608  | 7  | 7q31-q32 | yes |     | Skin basal cell    |                    |                                  | E | Dom | Mis          |                       |  | SMO; Q99835; Gx; SMOH; NP_005622; ENSG00000128602; 6608                                                       |

|               |                                                             |       |    |                |     |  |                                       |  |  |   |     |      |            |     |                                                                                                               |
|---------------|-------------------------------------------------------------|-------|----|----------------|-----|--|---------------------------------------|--|--|---|-----|------|------------|-----|---------------------------------------------------------------------------------------------------------------|
| <b>SOCS1</b>  | Suppressor of cytokine signaling 1                          | 8651  | 16 | 16p13.13       | yes |  | Hodgkin lymphoma; PMBL                |  |  | L | Rec | F; O |            |     | SOCS1; O15524; TIP3; CIS1; CISH1; JAB; Cish1; SSI1; SSI-1; SOCS-1; ENSG00000185338; 8651                      |
| <b>SOX2</b>   | SRY (sex determining region Y)-box 2                        | 6657  | 3  | 3q26.3-q27     | yes |  | NSCLC; oesophageal squamous carcinoma |  |  | E | Dom | A    |            | yes | MICROPHthalmia AND ESOPHAGEAL ATRESIA SYNDROME<br>P48431; MGC2413; ANOP3; ENSG00000181449; SOX2; 6657; MCOPS3 |
| <b>SRGAP3</b> | SLIT-ROBO Rho gtpase activating protein 3                   | 9901  | 3  | 3p25.3         | yes |  | Pilocytic astrocytoma                 |  |  | M | Dom | T    | RAF1       |     | SRGAP3; MEGAP; WRP; KIAA0411; SRGAP2; ARHGAP14; ENSG00000196220; 9901                                         |
| <b>SRSF2</b>  | Serine/arginine-rich splicing factor 2                      | 6427  | 17 | 17q25          | yes |  | MDS; CLL                              |  |  | L | Dom | Mis  |            |     | 6427; Q01130; SFRS2; SFRS2                                                                                    |
| <b>SS18</b>   | Synovial sarcoma translocation; chromosome 18               | 6760  | 18 | 18q11.2        | yes |  | Synovial sarcoma                      |  |  | M | Dom | T    | SSX1; SSX2 |     | Q15532; SYT; SSXT; ENSG00000141380; 6760; SS18                                                                |
| <b>SS18L1</b> | Synovial sarcoma translocation gene on chromosome 18-like 1 | 26039 | 20 | 20q13.3        | yes |  | Synovial sarcoma                      |  |  | M | Dom | T    | SSX1       |     | 26039; KIAA0693; O75177; ENSG00000184402; SS18L1                                                              |
| <b>SSX1</b>   | Synovial sarcoma; X breakpoint 1                            | 6756  | X  | Xp11.23-p11.22 | yes |  | Synovial sarcoma                      |  |  | M | Dom | T    | SS18       |     | 6756; MGC5162; Q16384; MGC150425; SSRC; RP11-552E4_1; ENSG00000126752; SSX1                                   |

|               |                                                                                  |       |    |                |     |     |                                                                               |                                                    |                        |            |     |                 |      |  |                                                                                                          |
|---------------|----------------------------------------------------------------------------------|-------|----|----------------|-----|-----|-------------------------------------------------------------------------------|----------------------------------------------------|------------------------|------------|-----|-----------------|------|--|----------------------------------------------------------------------------------------------------------|
| <b>SSX2</b>   | Synovial sarcoma; X breakpoint 2                                                 | 6757  | X  | Xp11.23-p11.22 | yes |     | Synovial sarcoma                                                              |                                                    |                        | M          | Dom | T               | SS18 |  | SSX2; HD21; RP11-552J9_2; MGC119055; MGC15364; MGC3884; HOM-MEL-40; SSX; 6757; ENSG00000157950           |
| <b>SSX4</b>   | Synovial sarcoma; X breakpoint 4                                                 | 6759  | X  | Xp11.23        | yes |     | Synovial sarcoma                                                              |                                                    |                        | M          | Dom | T               | SS18 |  | 6759; MGC119056; MGC12411; O60224; ENSG00000204645; SSX4                                                 |
| <b>STAG2</b>  | Stromal antigen 2                                                                | 10735 | X  | q25            | yes |     | Bladder carcinoma; glioblastoma; melanoma; Ewing's sarcoma; myeloid neoplasms |                                                    |                        | E; L; M; O | Rec | Mis; N; F; S    |      |  | SA2; RP11-517O1_1; bA517O1_1; DKFZp686P168; FLJ25871; SA-2; ENSG00000101972; STAG2; 10735; DKFZp781H1753 |
| <b>STAT3</b>  | Signal transducer and activator of transcription 3 (acute-phase response factor) | 6774  | 17 | 17q21.31       | yes |     | T-cell large granular lymphocytic leukaemia                                   |                                                    |                        | L          | Dom | Mis; O          |      |  | 6774; FLJ20882; MGC16063; P40763; APRF; STAT3; ENSG00000168610                                           |
| <b>STAT5B</b> | Signal transducer and activator of transcription 5B                              | 6777  | 17 | 17q11.2        | yes |     | Large granular lymphocytic leukaemia; skin basal cell; APL                    |                                                    |                        | L; E       | Dom | Mis; O          | RARA |  | 6777; STAT5; P51692; ENSG00000173757; STAT5B                                                             |
| <b>STK11</b>  | Serine/threonine kinase 11 gene (LKB1)                                           | 6794  | 19 | 19p13.3        | yes | yes | NSCLC; pancreatic                                                             | Jejunal hamartoma; ovarian; testicular; pancreatic | Peutz-Jeghers syndrome | E; M; O    | Rec | D; Mis; N; F; S |      |  | 6794; LKB1; PJS; Q15831; ENSG00000118046; STK11                                                          |

|                |                                                                                  |       |    |               |     |     |                                          |                 |                                |      |     |         |                   |  |                                                                           |
|----------------|----------------------------------------------------------------------------------|-------|----|---------------|-----|-----|------------------------------------------|-----------------|--------------------------------|------|-----|---------|-------------------|--|---------------------------------------------------------------------------|
| <b>STL</b>     | Six-twelve leukemia gene                                                         | 7955  | 6  | 6q23          | yes |     | B-ALL                                    |                 |                                | L    | Dom | T       | ETV6              |  |                                                                           |
| <b>SUFU</b>    | Suppressor of fused homolog (Drosophila)                                         | 51684 | 10 | 10q24.32      | yes | yes | Medulloblastoma                          | Medulloblastoma | medulloblastoma predisposition | O    | Rec | D; F; S |                   |  | 51684; RP11-47A8_1; SUFUH; Q9UMX1; SUFUXL; PRO1280; ENSG00000121410; SUFU |
| <b>SUZ12</b>   | Suppressor of zeste 12 homolog (Drosophila)                                      | 23512 | 17 | 17q11.2       | yes |     | Endometrial stromal tumour               |                 |                                | M    | Dom | T       | JAZF1             |  | 23512; CHET9; JJAZ1; KIAA0160; ENSG00000178691; Q15022; SUZ12             |
| <b>SYK</b>     | Spleen tyrosine kinase                                                           | 6850  | 9  | 9q22          | yes |     | MDS; peripheral T-cell lymphoma          |                 |                                | L    | Dom | T       | ETV6; ITK         |  | 6850; P43405; ENSG00000165025; SYK                                        |
| <b>TAF15</b>   | TAF15 RNA polymerase II; TATA box binding protein (TBP)-associated factor; 68kda | 8148  | 17 | 17q11.1-q11.2 | yes |     | Extraskeletal myxoid chondrosarcoma; ALL |                 |                                | L; M | Dom | T       | TEC; CHN1; ZNF384 |  | TAF15; hTAFII68; Q92804; Npl3; RBP56; TAF2N; ENSG00000172660; 8148        |
| <b>TAL1</b>    | T-cell acute lymphocytic leukemia 1 (SCL)                                        | 6886  | 1  | 1p32          | yes |     | Lymphoblastic leukaemia/biphasic         |                 |                                | L    | Dom | T       | TRD@; SIL         |  | TAL1; TCL5; tal-1; P17542; SCL; ENSG00000162367; 6886                     |
| <b>TAL2</b>    | T-cell acute lymphocytic leukemia 2                                              | 6887  | 9  | 9q31          | yes |     | T-ALL                                    |                 |                                | L    | Dom | T       | TRB@              |  | TAL2; Q16559; 6887                                                        |
| <b>TBL1XR1</b> | Transducin (beta)-like 1 X-linked receptor 1                                     | 79718 | 3  | 3q26.32       | yes |     | Splenic marginal zone lymphoma           |                 |                                | L    |     | F; Mis  |                   |  | 79718; C21; DC42; FLJ12894; IRA1; TBLR1; TBL1XR1                          |

|               |                                                                              |       |    |         |     |     |                                     |                                           |                          |   |     |        |                 |     |                                                                                                                       |
|---------------|------------------------------------------------------------------------------|-------|----|---------|-----|-----|-------------------------------------|-------------------------------------------|--------------------------|---|-----|--------|-----------------|-----|-----------------------------------------------------------------------------------------------------------------------|
| <b>TCEA1</b>  | Transcription elongation factor A (SII); 1                                   | 6917  | 8  | 8q11.2  | yes |     | Salivary adenoma                    |                                           |                          | E | Dom | T      | PLAG1           |     | 6917;<br>ENSG00000187735;<br>TCEA1                                                                                    |
| <b>TCF1</b>   | Transcription factor 1; hepatic (HNF1)                                       | 6927  | 12 | 12q24.2 | yes | yes | Hepatic adenoma; hepatocellular     | Hepatic adenoma; hepatocellular carcinoma | familial hepatic adenoma | E | Rec | Mis; F |                 | yes | Maturity-onset diabetes of the young; TYPE III<br>MODY3; HNF1; LFB1; P20823; HNF1A; TCF1; ENSG00000135100; TCF1; 6927 |
| <b>TCF12</b>  | Transcription factor 12 (HTF4; helix-loop-helix transcription factors 4)     | 6938  | 15 | 15q21   | yes |     | Extraskelatal myxoid chondrosarcoma |                                           |                          | M | Dom | T      | TEC             |     | 6938; HEB; HTF4; HsT17266; ENSG00000140262; TCF12                                                                     |
| <b>TCF3</b>   | Transcription factor 3 (E2A immunoglobulin enhancer binding factors E12/E47) | 6929  | 19 | 19p13.3 | yes |     | Pre B-ALL                           |                                           |                          | L | Dom | T      | PBX1; HLF; TFPT |     | 6929; E2A; ITF1; MGC129647; MGC129648; P15923; ENSG00000071564; TCF3                                                  |
| <b>TCF7L2</b> | Transcription factor 7-like 2                                                | 6934  | 10 | 10q25.3 | yes |     | Colorectal                          |                                           |                          | E | Dom | T      | VTI1A           |     | 6934;<br>ENSG00000148737;<br>TCF-4; TCF4; TCF7L2                                                                      |
| <b>TCL1A</b>  | T-cell leukemia/lymphoma 1A                                                  | 8115  | 14 | 14q32.1 | yes |     | T-CLL                               |                                           |                          | L | Dom | T      | TRA@            |     | 8115; P56279; TCL1; ENSG00000100721; TCL1A                                                                            |
| <b>TCL6</b>   | T-cell leukemia/lymphoma 6                                                   | 27004 | 14 | 14q32.1 | yes |     | T-ALL                               |                                           |                          | L | Dom | T      | TRA@            |     | TCL6; P56847; ENSG00000187621; 27004                                                                                  |

|             |                                                 |       |   |          |     |     |                                                                                                                                                   |          |  |      |     |              |                                 |     |                                                                                          |                                                                                       |
|-------------|-------------------------------------------------|-------|---|----------|-----|-----|---------------------------------------------------------------------------------------------------------------------------------------------------|----------|--|------|-----|--------------|---------------------------------|-----|------------------------------------------------------------------------------------------|---------------------------------------------------------------------------------------|
| <b>TERT</b> | Telomerase reverse transcriptase                | 7015  | 5 | 5p15.33  | yes | yes | Melanoma; glioblastoma; hepatocellular carcinoma; bladder; skin basal cell; skin squamous cell; mesothelioma; medulloblastoma; other tumour types | Melanoma |  | E; O | Dom | Promoter Mis |                                 | yes | Dyskeratosis congenita; Telomere-related pulmonary fibrosis and/or bone marrow failure 1 | TERT; EST2; TP2; TCS1; hEST2; O14746; O14783; Q2XS35; Q8N6C3; Q8NG46; 7015; TRT; TERT |
| <b>TET2</b> | Tet oncogene family member 2                    | 54790 | 4 | 4q24     | yes |     | MDS                                                                                                                                               |          |  | L    | Rec | Mis N; F     |                                 |     |                                                                                          | Q6N021; TET2-202; 54790; ENSG00000168769; FLJ20032; KIAA1546; MGC125715               |
| <b>TFE3</b> | Transcription factor binding to IGHM enhancer 3 | 7030  | X | Xp11.22  | yes |     | Papillary renal; alveolar soft part sarcoma; renal                                                                                                |          |  | E    | Dom | T            | SFPQ; ASPSCR1; PRCC; NONO; CLTC |     |                                                                                          | 7030; RCCP2; TFEA; ENSG00000068323; TFE3                                              |
| <b>TFEB</b> | Transcription factor EB                         | 7942  | 6 | 6p21     | yes |     | Renal cell carcinoma (childhood epithelioid)                                                                                                      |          |  | E; M | Dom | T            | ALPHA                           |     |                                                                                          | TFEB; TCFEB; AlphaTFEB; P19484; ENSG00000112561; 7942                                 |
| <b>TFG</b>  | TRK-fused gene                                  | 10342 | 3 | 3q11-q12 | yes |     | Papillary thyroid; ALCL; NSCLC                                                                                                                    |          |  | E; L | Dom | T            | NTRK1; ALK                      |     |                                                                                          | 10342; TF6; Q92734; TFG; ENSG00000114354                                              |



|                |                                                         |       |    |          |     |  |                      |  |  |   |     |   |                       |  |                                                                                                |
|----------------|---------------------------------------------------------|-------|----|----------|-----|--|----------------------|--|--|---|-----|---|-----------------------|--|------------------------------------------------------------------------------------------------|
| <b>TFPT</b>    | TCF3 (E2A) fusion partner (in childhood leukaemia)      | 29844 | 19 | 19q13    | yes |  | pre-B ALL            |  |  | L | Dom | T | TCF3                  |  | 29844; P0C1Z6; ENSG00000105619; TFPT                                                           |
| <b>TFRC</b>    | Transferrin receptor (p90; CD71)                        | 7037  | 3  | 3q29     | yes |  | NHL                  |  |  | L | Dom | T | BCL6                  |  | 7037; P02786; CD71; TFR1; ENSG00000072274; TFRC                                                |
| <b>THRAP3</b>  | Thyroid hormone receptor associated protein 3 (TRAP150) | 9967  | 1  | 1p34.3   | yes |  | Aneurysmal bone cyst |  |  | M | Dom | T | USP6                  |  | 9967; MGC133082; Q9Y2W1; MGC133083; TRAP150; FLJ22082; ENSG00000054118; THRAP3                 |
| <b>TIF1</b>    | Transcriptional intermediary factor 1 (PTC6; TIF1A)     | 8805  | 7  | 7q32-q34 | yes |  | APL                  |  |  | L | Dom | T | RARA                  |  | P04720; hTIF1; TIF1A; Tif1a; TF1A; TIF1ALPHA; RNF82; ENSG00000122779; 8805; TRIM24; PTC6; TIF1 |
| <b>TLX1</b>    | T-cell leukemia; homeobox 1 (HOX11)                     | 3195  | 10 | 10q24    | yes |  | T-ALL                |  |  | L | Dom | T | TRB@; TRD@            |  | TLX1; P31314; HOX11; TCL3; ENSG00000107807; 3195                                               |
| <b>TLX3</b>    | T-cell leukemia; homeobox 3 (HOX11L2)                   | 30012 | 5  | 5q35.1   | yes |  | T-ALL                |  |  | L | Dom | T | BCL11B                |  | HOX11L2; O43711; RNX; ENSG00000164438; TLX3; 30012                                             |
| <b>TMPRSS2</b> | Transmembrane protease; serine 2                        | 7113  | 21 | 21q22.3  | yes |  | Prostate             |  |  | E | Dom | T | ERG; ETV1; ETV4; ETV5 |  | O15393; PRSS10; ENSG00000184012; TMPRSS2; 7113                                                 |

|                 |                                                                                     |      |    |             |     |     |                                                                                        |                                                                                |                      |            |     |           |                  |  |                                                                                               |
|-----------------|-------------------------------------------------------------------------------------|------|----|-------------|-----|-----|----------------------------------------------------------------------------------------|--------------------------------------------------------------------------------|----------------------|------------|-----|-----------|------------------|--|-----------------------------------------------------------------------------------------------|
| <b>TNFAIP3</b>  | Tumour necrosis factor; alpha-induced protein 3                                     | 7128 | 6  | 6q23        | yes |     | Marginal zone B-cell lymphomas; Hodgkin lymphoma; PMBL                                 |                                                                                |                      | L          | Rec | D; N; F   |                  |  | 7128; TNFAIP2; P21580; A20; MGC104522; MGC138687; MGC138688; OTUD7C; TNFAIP3; ENSG00000118503 |
| <b>TNFRSF14</b> | Tumour necrosis factor receptor superfamily; member 14 (herpesvirus entry mediator) | 8764 | 1  | 1p36.32     | yes |     | Follicular lymphoma                                                                    |                                                                                |                      | L          | Rec | Mis; N; F |                  |  | 8764; Q92956; HVEA; HVEM; LIGHTR; ATAR; TR2; ENSG00000157873; TNFRSF14                        |
| <b>TNFRSF17</b> | Tumour necrosis factor receptor superfamily; member 17                              | 608  | 16 | 16p13.1     | yes |     | Intestinal T-cell lymphoma                                                             |                                                                                |                      | L          | Dom | T         | IL2              |  | 608; BCMA; BCM; Q02223; CD269; ENSG0000048462; TNFRSF17                                       |
| <b>TOP1</b>     | Topoisomerase (DNA) I                                                               | 7150 | 20 | 20q12-q13.1 | yes |     | AML*                                                                                   |                                                                                |                      | L          | Dom | T         | NUP98            |  | RP3-511B24_2; P11387; TOPI; ENSG00000198900; 7150; TOPI                                       |
| <b>TP53</b>     | Tumour protein p53                                                                  | 7157 | 17 | 17p13       | yes | yes | Breast; colorectal; lung; sarcoma; adrenocortical; glioma; multiple other tumour types | Breast; sarcoma; adrenocortical carcinoma; glioma; multiple other tumour types | Li-Fraumeni syndrome | L; E; M; O | Rec | Mis; N; F |                  |  | LFS1; TRP53; p53; P53; P04637; ENSG00000141510; 7157; TP53                                    |
| <b>TPM3</b>     | Tropomyosin 3                                                                       | 7170 | 1  | 1q22-q23    | yes |     | Papillary thyroid; ALCL; NSCLC                                                         |                                                                                |                      | E; L       | Dom | T         | NTRK1; ALK; ROS1 |  | TPM3; ENSG00000143549; 7170                                                                   |

|               |                                                     |       |    |         |     |  |                   |  |  |   |     |     |                                           |  |  |                                                                                                |
|---------------|-----------------------------------------------------|-------|----|---------|-----|--|-------------------|--|--|---|-----|-----|-------------------------------------------|--|--|------------------------------------------------------------------------------------------------|
| <b>TPM4</b>   | Tropomyosin 4                                       | 7171  | 19 | 19p13.1 | yes |  | ALCL              |  |  | L | Dom | T   | ALK                                       |  |  | 7171; P67936; ENSG00000167460; TPM4                                                            |
| <b>TPR</b>    | Translocated promoter region                        | 7175  | 1  | 1q25    | yes |  | Papillary thyroid |  |  | E | Dom | T   | NTRK1                                     |  |  | 7175; P12270; TPR                                                                              |
| <b>TRA@</b>   | T cell receptor alpha locus                         | 6955  | 14 | 14q11.2 | yes |  | T-ALL             |  |  | L | Dom | T   | ATL; OLIG2; MYC; TCL1A; TCL6; MTCP1; TCL6 |  |  |                                                                                                |
| <b>TRAF7</b>  | Tumour necrosis factor receptor-associated factor 7 | 84231 | 16 | 16p13.3 | yes |  | Meningioma        |  |  | O | Dom | Mis |                                           |  |  | TRAF7; DKFZp586I021; RFWD1; Q6Q0C0; MGC7807; RNF119; 84231; ENSG00000131653                    |
| <b>TRB@</b>   | T cell receptor beta locus                          | 6957  | 7  | 7q35    | yes |  | T-ALL             |  |  | L | Dom | T   | HOX11; LCK; NOTCH1; TAL2; LYL1            |  |  |                                                                                                |
| <b>TRD@</b>   | T cell receptor delta locus                         | 6964  | 14 | 14q11   | yes |  | T-cell leukaemia  |  |  | L | Dom | T   | TAL1; HOX11; TLX1; LMO1; LMO2; RANBP17    |  |  |                                                                                                |
| <b>TRIM27</b> | Tripartite motif-containing 27                      | 5987  | 6  | 6p22    | yes |  | Papillary thyroid |  |  | E | Dom | T   | RET                                       |  |  | RFP; DASS-46L4_6; TRIM27; RNF76; ENSG00000234495; 5987; RFP                                    |
| <b>TRIM33</b> | Tripartite motif-containing 33 (PTC7; TIF1G)        | 51592 | 1  | 1p13    | yes |  | Papillary thyroid |  |  | E | Dom | T   | RET                                       |  |  | TRIM33; PTC7; TIF1G; RFG7; TIF1GAMMA; TIFGAMMA; FLJ32925; TF1G; Q9UPN9; 51592; ENSG00000197323 |

|               |                                                        |      |    |             |     |     |                                                                                        |                                                           |                      |      |     |                 |        |                                                                      |                                                                                         |
|---------------|--------------------------------------------------------|------|----|-------------|-----|-----|----------------------------------------------------------------------------------------|-----------------------------------------------------------|----------------------|------|-----|-----------------|--------|----------------------------------------------------------------------|-----------------------------------------------------------------------------------------|
| <b>TRIP11</b> | Thyroid hormone receptor interactor 11                 | 9321 | 14 | 14q31-q32   | yes |     | AML                                                                                    |                                                           |                      | L    | Dom | T               | PDGFRB |                                                                      | TRIP11; Q15643; CEV14; Trip230; ENSG00000100815; 9321                                   |
| <b>TRRAP</b>  | Transformation/transcription domain-associated protein | 8295 | 7  | q21.2-q22.1 | yes |     | Melanoma                                                                               |                                                           |                      | E    | Dom | Mis             |        |                                                                      | 8295; TR-AP; Tra1; STAF40; FLJ10671; PAF350/400; PAF400; Q9Y4A5; ENSG00000196367; TRRAP |
| <b>TSC1</b>   | Tuberous sclerosis 1 gene                              | 7248 | 9  | 9q34        | yes | yes | Renal cell carcinoma; bladder carcinoma                                                | Hamartoma; renal cell carcinoma; tuberous sclerosis tuber | Tuberous sclerosis 1 | E; O | Rec | D; Mis; N; F; S |        |                                                                      | KIAA0243; hamartin; LAM; MGC86987; TSC; ENSG00000165699; 7248; TSC1                     |
| <b>TSC2</b>   | Tuberous sclerosis 2 gene                              | 7249 | 16 | 16p13.3     | yes | yes | Pulmonary lymphangioliomyomatosis (LAM); renal angiomyolipoma and head and neck cancer | Hamartoma; renal cell carcinoma; tuberous sclerosis tuber | Tuberous sclerosis 2 | E; O | Rec | D; Mis; N; F; S |        |                                                                      | 7249; FLJ43106; TSC4; tuberin; LAM; ENSG00000103197; TSC2                               |
| <b>TSHR</b>   | Thyroid stimulating hormone receptor                   | 7253 | 14 | 14q31       | yes | yes | Toxic thyroid adenoma                                                                  | Thyroid adenoma                                           |                      | E    | Dom | Mis             | yes    | Hereditary nonautoimmune hyperthyroidism; subclinical hypothyroidism | 7253; hTSHR-I; LGR3; MGC75129; ENSG00000165409; TSHR                                    |

|              |                                                                |        |    |                |     |     |                                      |                                      |                            |         |                    |                 |                                              |  |                                                                                                        |
|--------------|----------------------------------------------------------------|--------|----|----------------|-----|-----|--------------------------------------|--------------------------------------|----------------------------|---------|--------------------|-----------------|----------------------------------------------|--|--------------------------------------------------------------------------------------------------------|
| <b>TTL</b>   | Tubulin tyrosine ligase                                        | 150465 | 2  | 2q13           | yes |     | ALL                                  |                                      |                            | L       | Dom                | T               | ETV6                                         |  | 150465;<br>2410003M22Rik;<br>MGC46235; Q8NG68;<br>ENSG00000114999;<br>TTL                              |
| <b>U2AF1</b> | U2 small nuclear RNA auxiliary factor 1                        | 7307   | 21 | 21q22.3        | yes |     | CLL; MDS                             |                                      |                            | L       | Dom                | Mis             |                                              |  | 7307;<br>ENSG00000160201;<br>DKFZp313J1712;<br>FP793; RN; RNU2AF1;<br>U2AF35; U2AFBP;<br>Q01081; U2AF1 |
| <b>UBR5</b>  | Ubiquitin protein ligase E3 component n-recognin 5             | 51366  | 8  | 8q22           | yes |     | Mantle cell lymphoma                 |                                      |                            | L       |                    |                 |                                              |  |                                                                                                        |
| <b>USP6</b>  | Ubiquitin specific peptidase 6 (Tre-2 oncogene)                | 9098   | 17 | 17p13          | yes |     | Aneurysmal bone cyst                 |                                      |                            | M       | Dom                | T               | COL1A1;<br>CDH11;<br>ZNF9;<br>OMD;<br>THRAP3 |  | Tre-2; HRP1; TRE17;<br>ENSG00000129204;<br>9098; USP6; TRE2                                            |
| <b>VHL</b>   | Von Hippel-Lindau syndrome gene                                | 7428   | 3  | 3p25           | yes | yes | Renal; haemangioma; pheochromocytoma | Renal; haemangioma; pheochromocytoma | Von Hippel-Lindau syndrome | E; M; O | Rec                | D; Mis; N; F; S |                                              |  | P40337; HRCA1;<br>VHL1; RCA1;<br>ENSG00000134086;<br>7428; VHL                                         |
| <b>VTI1A</b> | Vesicle transport through interaction with t-snares homolog 1A | 143187 | 10 | 10q25.2        | yes |     | Colorectal                           |                                      |                            | E       | Dom                | T               | TCF7L2                                       |  | Vti1-rp2; VTI1A;<br>143187;<br>ENSG00000151532;<br>MVti1                                               |
| <b>WAS</b>   | Wiskott-Aldrich syndrome                                       | 7454   | X  | Xp11.23-p11.22 |     |     | Lymphoma                             | Wiskott-Aldrich syndrome             |                            | L       | X-linked recessive | Mis; N; F; S    |                                              |  | WAS; P42768; IMD2;<br>THC; WASP;<br>ENSG00000015285;<br>7454                                           |

|                |                                                    |       |    |            |     |     |                                                    |                                              |                                                               |            |     |                 |        |  |                                                                                                    |
|----------------|----------------------------------------------------|-------|----|------------|-----|-----|----------------------------------------------------|----------------------------------------------|---------------------------------------------------------------|------------|-----|-----------------|--------|--|----------------------------------------------------------------------------------------------------|
| <b>WHSC1</b>   | Wolf-Hirschhorn syndrome candidate 1(MMSET)        | 7468  | 4  | 4p16.3     | yes |     | MM                                                 |                                              |                                                               | L          | Dom | T               | IGH@   |  | WHS; 7468; WHSC1_ENST00000382891; FLJ23286; KIAA1090; MGC176638; MMSET; REIIBP; TRX5; O96028; NSD2 |
| <b>WHSC1L1</b> | Wolf-Hirschhorn syndrome candidate 1-like 1 (NSD3) | 54904 | 8  | 8p12       | yes |     | AML                                                |                                              |                                                               | L          | Dom | T               | NUP98  |  | 54904; ENSG00000147548; WHSC1L1                                                                    |
| <b>WIF1</b>    | WNT inhibitory factor 1                            | 11197 | 12 | 12q14.3    | yes |     | Pleomorphic salivary gland adenoma                 |                                              |                                                               | E          | Dom | T               | HMGA2  |  | 11197; WIF-1; ENSG00000156076; WIF1                                                                |
| <b>WRN</b>     | Werner syndrome (RECQL2)                           | 7486  | 8  | 8p12-p11.2 |     | yes |                                                    | Osteosarcoma; meningioma; other tumour types | Werner syndrome                                               | L; E; M; O | Rec | Mis; N; F; S    |        |  | WRN; RECQL2; RECQ3; Q14191; ENSG00000165392; 7486                                                  |
| <b>WT1</b>     | Wilms tumour 1 gene                                | 7490  | 11 | 11p13      | yes | yes | Wilms tumour; desmoplastic small round cell tumour | Wilms tumour                                 | Denys-Drash syndrome; Frasier syndrome; familial Wilms tumour | O          | Rec | D; Mis; N; F; S | EWSR1  |  | 7490; WAGR; WIT-2; GUD; WT33; ENSG00000184937; WT1                                                 |
| <b>WWTR1</b>   | WW domain containing transcription regulator 1     | 25937 | 3  | 3q23-q24   | yes |     | Epithelioid haemangioma                            |                                              |                                                               | M          | Dom | T               | CAMTA1 |  | 25937; ENSG00000018408; DKFZP586I1419; TAZ; Q9GZV5; WWTR1                                          |

|               |                                                                                                              |       |    |           |     |     |                             |                                               |                           |   |     |              |                |     |                                                          |                                                                                           |
|---------------|--------------------------------------------------------------------------------------------------------------|-------|----|-----------|-----|-----|-----------------------------|-----------------------------------------------|---------------------------|---|-----|--------------|----------------|-----|----------------------------------------------------------|-------------------------------------------------------------------------------------------|
| <b>XPA</b>    | Xeroderma pigmentosum; complementation group A                                                               | 7507  | 9  | 9q22.3    |     | yes |                             | Skin basal cell; skin squamous cell; melanoma | xeroderma pigmentosum (A) | E | Rec | Mis; N; F; S |                |     | 7507; XPAC; P23025; XPI; ENSG00000136936; XPA            |                                                                                           |
| <b>XPC</b>    | Xeroderma pigmentosum; complementation group C                                                               | 7508  | 3  | 3p25      |     | yes |                             | Skin basal cell; skin squamous cell; melanoma | xeroderma pigmentosum (C) | E | Rec | Mis; N; F; S |                |     | 7508; XP3; XPCC; ENSG00000154767; XPC                    |                                                                                           |
| <b>XPO1</b>   | Exportin 1 (CRM1 homolog; yeast)                                                                             | 7514  | 2  | 2p15      | yes |     | CLL                         |                                               |                           | L | Dom | Mis          |                |     | 7514; DKFZp686B1823; CRM1; O14980; ENSG00000082898; XPO1 |                                                                                           |
| <b>YWHAE</b>  | Tyrosine 3-monooxygenase/tryptophan 5-monooxygenase activation protein; epsilon polypeptide (14-3-3 epsilon) | 7531  | 17 | 17p13.3   | yes |     | Endometrial stromal sarcoma |                                               |                           | M | Dom | T            | NUTM2A; NUTM2B | yes | Miller-Dieker lissencephaly syndrome                     | 14-3-3E; P62258; KCIP1; MDCR; MDS; FLJ45465; 14-3-3 epsilon; ENSG00000108953; 7531; YWHAE |
| <b>ZNF145</b> | Zinc finger protein 145 (PLZF)                                                                               | 7704  | 11 | 11q23.1   | yes |     | APL                         |                                               |                           | L | Dom | T            | RARA           |     |                                                          | Q05516; PLZF; ZNF145; ENSG00000109906; ZBTB16; 7704                                       |
| <b>ZNF198</b> | Zinc finger protein 198                                                                                      | 7750  | 13 | 13q11-q12 | yes |     | MPN; NHL                    |                                               |                           | L | Dom | T            | FGFR1          |     |                                                          | 7750; ZMYM2; Q9UBW7; ZNF198; MYM; FIM; RAMP; ENSG00000121741; ZNF198                      |
| <b>ZNF278</b> | Zinc finger protein 278 (ZSG)                                                                                | 23598 | 22 | 22q12-q14 | yes |     | Ewing sarcoma               |                                               |                           | M | Dom | T            | EWSR1          |     |                                                          | PATZ1; ENSG00000100105; 23598                                                             |

|               |                                                                            |        |    |               |     |  |                            |  |  |   |     |   |              |  |                                                                                 |
|---------------|----------------------------------------------------------------------------|--------|----|---------------|-----|--|----------------------------|--|--|---|-----|---|--------------|--|---------------------------------------------------------------------------------|
| <b>ZNF331</b> | Zinc finger protein 331                                                    | 55422  | 19 | 19q13.3-q13.4 | yes |  | Follicular thyroid adenoma |  |  | E | Dom | T | ?            |  | 55422; Q9NQX6; ZNF463; RITA; ZNF361; ENSG00000130844; ZNF331                    |
| <b>ZNF384</b> | Zinc finger protein 384 (CIZ/NMP4)                                         | 171017 | 12 | 12p13         | yes |  | ALL                        |  |  | L | Dom | T | EWSR1; TAF15 |  | 171017; ENSG00000126746; ZNF384                                                 |
| <b>ZNF521</b> | Zinc finger protein 521                                                    | 25925  | 18 | 18q11.2       | yes |  | ALL                        |  |  | L | Dom | T | PAX5         |  | 25925; EHZF; Evi3; DKFZp564D0764; MGC142182; MGC142208; ENSG00000198795; ZNF521 |
| <b>ZNF9</b>   | Zinc finger protein 9 (a cellular retroviral nucleic acid binding protein) | 7555   | 3  | 3q21          | yes |  | Aneurysmal bone cyst       |  |  | M | Dom | T | USP6         |  | 7555; P62633; CNBP; DM2; RNF163; ZNF9; ZNF9; ENSG00000169714                    |
| <b>ZRSR2</b>  | Zinc finger (CCCH type); RNA-binding motif and serine/arginine rich 2      | 8233   | X  | Xp22.1        | yes |  | MDS; CLL                   |  |  | L | Rec |   |              |  |                                                                                 |



**Supplementary Table 2. Predicted targets of hsa-miR-181a-5p by DIANA microT v 5.0.**

| <b>Gene name</b> | <b>Full name</b>                                                | <b>miTG score</b> | <b>Cancer gene</b> |
|------------------|-----------------------------------------------------------------|-------------------|--------------------|
| ABI1             | Abl-interactor 1                                                | 0.957             | √                  |
| ABI2             | Abl-interactor 2                                                | 0.701             | √                  |
| ABI3BP           | ABI family, member 3 (NESH) binding protein                     | 0.81              |                    |
| ABRA             | Actin-binding Rho activating protein                            | 0.711             |                    |
| AC010547.9       | Zinc finger protein 23                                          | 0.856             |                    |
| AC022415.1       | Zinc finger family member 788                                   | 0.877             |                    |
| AC130352.1       | Unknown miRNA gene                                              | 0.939             |                    |
| ACOT11           | Acyl-CoA thioesterase 11                                        | 0.862             |                    |
| ADCK3            | aarF domain containing kinase 3                                 | 0.736             |                    |
| AFF4             | AF4/FMR2 family, member 4                                       | 0.703             |                    |
| AFTPH            | Aftiphilin                                                      | 0.752             |                    |
| AGT              | Angiotensinogen (serpin peptidase inhibitor, clade A, member 8) | 0.733             |                    |
| AHCTF1           | AT hook containing transcription factor 1                       | 0.93              |                    |
| AKIRIN1          | Akirin 1                                                        | 0.815             |                    |
| AKT3             | V-akt murine thymoma viral oncogene homolog 3                   | 0.896             |                    |
| AL136419.1       | Uncharacterized protein C14orf167                               | 0.712             |                    |
| AL137003.1       | ATXN1 protein Fragment                                          | 0.79              |                    |
| AMOTL1           | Angiomotin like 1                                               | 0.757             |                    |
| ANGPT2           | Angiopoietin 2                                                  | 0.802             |                    |
| ANKRD13C         | Ankyrin repeat domain 13C                                       | 0.97              |                    |
| ANKRD26          | Ankyrin repeat domain 26                                        | 0.716             |                    |
| ANO1             | Anoctamin 1, calcium activated chloride channel                 | 0.745             |                    |
| ARHGAP11A        | Rho GTPase activating protein 11A                               | 0.713             |                    |
| ARHGAP26         | Rho GTPase activating protein 26                                | 0.758             |                    |
| ARID2            | AT rich interactive domain 2 (ARID, RFX-like)                   | 0.742             | √                  |
| ARIH2            | Ariadne RBR E3 ubiquitin protein ligase 2                       | 0.707             |                    |
| ARMC8            | Armadillo repeat containing 8                                   | 0.88              |                    |
| ASAH2B           | N-acylsphingosine amidohydrolase (non-lysosomal ceramidase) 2B  | 0.857             |                    |
| ATM              | ATM serine/threonine kinase                                     | 0.93              | √                  |

|           |                                                                                      |       |   |
|-----------|--------------------------------------------------------------------------------------|-------|---|
| ATP1B1    | ATPase, Na <sup>+</sup> /K <sup>+</sup> transporting, b1 polypeptide                 | 0.992 |   |
| ATP8B4    | ATPase, class I, type 8B, member 4                                                   | 0.824 |   |
| AVL9      | AVL9 homolog ( <i>S. cerevisiae</i> )                                                | 0.734 |   |
| B3GALT5   | UDP-Gal:betaGlcNAc beta 1,3-galactosyltransferase, polypeptide 5                     | 0.826 |   |
| BACH1     | BTB and CNC homology 1, basic leucine zipper transcription factor 1                  | 0.758 |   |
| BAG2      | BCL2-associated athanogene 2                                                         | 0.759 |   |
| BAI3      | Brain-specific angiogenesis inhibitor 3                                              | 0.977 |   |
| BCAS1     | Breast carcinoma amplified sequence 1                                                | 0.727 |   |
| BCL11B    | B-cell CLL/lymphoma 11B (zinc finger protein)                                        | 0.729 | √ |
| BCL2L11   | BCL2-like 11 (apoptosis facilitator)                                                 | 0.843 |   |
| BCL6      | B-cell CLL/lymphoma 6                                                                | 0.825 | √ |
| BCLAF1    | BCL2-associated transcription factor 1                                               | 0.823 |   |
| BDP1      | B double prime 1, subunit of RNA polymerase III transcription initiation factor IIIB | 0.744 |   |
| BEND4     | BEN domain containing 4                                                              | 0.743 |   |
| BHLHE40   | Basic helix-loop-helix family, member e40                                            | 0.984 |   |
| BIRC6     | Baculoviral IAP repeat containing 6                                                  | 0.98  |   |
| BRAP      | BRCA1 associated protein                                                             | 0.883 |   |
| BRD1      | Bromodomain containing 1                                                             | 0.869 |   |
| C10orf131 | Chromosome 10 open reading frame 131                                                 | 0.919 |   |
| C14orf28  | Chromosome 14 open reading frame 28                                                  | 0.844 |   |
| C16orf87  | Chromosome 16 open reading frame 87                                                  | 0.939 |   |
| C18orf63  | Chromosome 18 open reading frame 63                                                  | 0.702 |   |
| C1orf98   | Long intergenic non-protein coding RNA 862                                           | 0.947 |   |
| C21orf90  | Chromosome 21 open reading frame 90                                                  | 0.826 |   |
| C2orf69   | Chromosome 2 open reading frame 69                                                   | 0.978 |   |
| C4orf33   | Chromosome 4 open reading frame 33                                                   | 0.72  |   |
| C6orf62   | Chromosome 6 open reading frame 62                                                   | 0.821 |   |
| C9orf35   | CDNA FLJ23651 fis, clone COL08363CDNA FLJ23916 fis, clone COL00117                   | 0.755 |   |
| CACHD1    | Cache domain containing 1                                                            | 0.862 |   |
| CACUL1    | CDK2-associated, cullin domain 1                                                     | 0.714 |   |
| CADPS     | Ca <sup>++</sup> -dependent secretion activator                                      | 0.888 |   |
| CALB1     | Calbindin 1, 28 kDa                                                                  | 0.963 |   |

|         |                                                                                   |       |   |
|---------|-----------------------------------------------------------------------------------|-------|---|
| CALCRL  | Calcitonin receptor-like                                                          | 0.894 |   |
| CALM1   | Calmodulin 1 (phosphorylase kinase, delta)                                        | 0.898 |   |
| CAMSAP1 | Calmodulin regulated spectrin-associated protein 1                                | 0.786 |   |
| CAMSAP2 | Calmodulin regulated spectrin-associated protein family, member 2                 | 0.919 |   |
| CARD11  | Caspase recruitment domain family, member 11                                      | 0.886 | √ |
| CBX5    | Chromobox homolog 5                                                               | 0.809 |   |
| CCDC132 | Coiled-coil domain containing 132                                                 | 0.873 |   |
| CCDC50  | Coiled-coil domain containing 50                                                  | 0.83  |   |
| CCDC6   | Coiled-coil domain containing 6                                                   | 0.754 | √ |
| CCNJ    | Cyclin J                                                                          | 0.936 |   |
| CCP110  | Centriolar coiled coil protein 110 kDa                                            | 0.859 |   |
| CDC40   | Cell division cycle 40                                                            | 0.771 |   |
| CDK8    | Cyclin-dependent kinase 8                                                         | 0.704 |   |
| CDKL2   | Cyclin-dependent kinase-like 2 (CDC2-related kinase)                              | 0.722 |   |
| CDON    | Cell adhesion associated, oncogene regulated                                      | 0.918 |   |
| CEBPG   | CCAAT/enhancer binding protein (C/EBP), gamma                                     | 0.944 |   |
| CEP41   | Centrosomal protein 41 kDa                                                        | 0.806 |   |
| CEP57L1 | Centrosomal protein 57 kDa-like 1                                                 | 0.824 |   |
| CEP85L  | Centrosomal protein 85 kDa-like                                                   | 0.779 |   |
| CFHR3   | Complement factor H-related 3                                                     | 0.719 |   |
| CHIC1   | Cysteine-rich hydrophobic domain 1                                                | 0.811 |   |
| CHMP3   | Charged multivesicular body protein                                               | 0.851 |   |
| CHN1    | Chimerin 1                                                                        | 0.718 | √ |
| CLASP1  | Cytoplasmic linker associated protein 1                                           | 0.998 |   |
| CLINT1  | Clathrin interactor 1                                                             | 0.95  |   |
| CLVS1   | Clavesin 1                                                                        | 0.943 |   |
| COL4A1  | Collagen, type IV, alpha 1                                                        | 0.717 |   |
| COPS2   | COP9 signalosome subunit 2                                                        | 0.94  |   |
| CREB1   | cAMP responsive element binding protein 1                                         | 0.939 | √ |
| CREB5   | cAMP responsive element binding protein 5                                         | 0.963 |   |
| CREBRF  | CREB3 regulatory factor                                                           | 0.997 |   |
| CRK     | v-crk avian sarcoma virus CT10 oncogene homolog                                   | 0.853 |   |
| CSF2RB  | Colony stimulating factor 2 receptor, beta, low-affinity (granulocyte-macrophage) | 0.872 |   |

|                |                                                                 |       |  |
|----------------|-----------------------------------------------------------------|-------|--|
| CTD-2192J16.17 | Zinc finger protein 709                                         | 0.918 |  |
| CTTNBP2        | Cortactin binding protein 2                                     | 0.795 |  |
| CUL5           | Cullin 5                                                        | 0.972 |  |
| CXorf40B       | Chromosome X open reading frame 40B                             | 0.723 |  |
| CYP11B1        | Cytochrome P450, family 11, subfamily B, polypeptide 1          | 0.806 |  |
| CYP3A5         | Cytochrome P450, family 3, subfamily A, polypeptide 5           | 0.77  |  |
| CYSLTR1        | Cysteinyl leukotriene receptor 1                                | 0.701 |  |
| DACT2          | Dishevelled-binding antagonist of $\beta$ -catenin 2            | 0.712 |  |
| DAZAP2         | DAZ associated protein 2                                        | 0.768 |  |
| DBF4           | DBF4 zinc finger                                                | 0.853 |  |
| DCBLD2         | Discoidin, CUB and LCCL domain containing 2                     | 0.872 |  |
| DDI2           | DNA-damage inducible 1 homolog 2 ( <i>S. cerevisiae</i> )       | 0.919 |  |
| DDIT4          | DNA-damage-inducible transcript 4                               | 0.738 |  |
| DDX20          | DEAD (Asp-Glu-Ala-Asp) box polypeptide 20                       | 0.819 |  |
| DDX21          | DEAD (Asp-Glu-Ala-Asp) box helicase 21                          | 0.76  |  |
| DDX52          | DEAD (Asp-Glu-Ala-Asp) box polypeptide 52                       | 0.961 |  |
| DERL1          | Derlin 1                                                        | 0.816 |  |
| DGKH           | Diacylglycerol kinase, eta                                      | 0.845 |  |
| DIS3L          | DIS3 like exosome 3'-5' exoribonuclease                         | 0.877 |  |
| DLEU7          | Deleted in lymphocytic leukemia, 7                              | 0.829 |  |
| DLGAP2         | Discs, large ( <i>Drosophila</i> ) homolog-associated protein 2 | 0.956 |  |
| DNAJC21        | DnaJ (Hsp40) homolog, subfamily C, member 21                    | 0.928 |  |
| DNAJC6         | DnaJ (Hsp40) homolog, subfamily C, member 6                     | 0.72  |  |
| DOCK10         | Dedicator of cytokinesis 10                                     | 0.844 |  |
| DOK6           | Docking protein 6                                               | 0.727 |  |
| DPY19L1        | Dpy-19-like 1 ( <i>C. elegans</i> )                             | 0.865 |  |
| DUSP5          | Dual specificity phosphatase 5                                  | 0.73  |  |
| DYNC1LI2       | Dynein, cytoplasmic 1, light intermediate chain 2               | 0.85  |  |
| EED            | Embryonic ectoderm development                                  | 0.731 |  |
| EGR2           | Early growth response 2                                         | 0.716 |  |
| EIF2C4         | Argonaute RISC catalytic component 4                            | 0.852 |  |
| EIF3F          | Eukaryotic translation initiation factor 3, subunit F           | 0.774 |  |

|          |                                                             |       |  |
|----------|-------------------------------------------------------------|-------|--|
| EN1      | Engrailed homeobox 1                                        | 0.877 |  |
| ENTPD6   | Ectonucleoside triphosphate diphosphohydrolase 6 (putative) | 0.917 |  |
| EPB41L3  | Erythrocyte membrane protein band 4.1-like 3                | 0.832 |  |
| EPHA7    | EPH receptor A7                                             | 0.734 |  |
| EPT1     | Ethanolaminephosphotransferase 1                            | 0.77  |  |
| ERLIN1   | ER lipid raft associated 1                                  | 0.803 |  |
| EYA3     | EYA transcriptional coactivator and phosphatase 3           | 0.761 |  |
| F2R      | Coagulation factor II (thrombin) receptor                   | 0.737 |  |
| FAM107B  | Family with sequence similarity 107, member B               | 0.718 |  |
| FAM122B  | Family with sequence similarity 122B                        | 0.767 |  |
| FAM160A1 | Family with sequence similarity 160, member A1              | 0.834 |  |
| FAM190A  | Coiled-coil serine-rich protein 1                           | 0.707 |  |
| FAM190B  | Coiled-coil serine-rich protein 2                           | 0.858 |  |
| FAM26E   | Family with sequence similarity 26, member E                | 0.752 |  |
| FAM63B   | Family with sequence similarity 63, member B                | 0.798 |  |
| FAM9C    | Family with sequence similarity 9, member C                 | 0.965 |  |
| FBXL17   | F-box and leucine-rich repeat protein 17                    | 0.951 |  |
| FBXO33   | F-box protein 33                                            | 0.993 |  |
| FBXO43   | F-box protein 43                                            | 0.958 |  |
| FBXO5    | F-box protein 5                                             | 0.824 |  |
| FMNL2    | Formin-like 2                                               | 0.931 |  |
| FOXP2    | Forkhead box P2                                             | 0.769 |  |
| FRMD7    | FERM domain containing 7                                    | 0.76  |  |
| FYTTD1   | Forty-two-three domain containing 1                         | 0.729 |  |
| FZD6     | Frizzled class receptor 6                                   | 0.823 |  |
| G2E3     | G2/M-phase specific E3 ubiquitin protein ligase             | 0.888 |  |
| GAB1     | GRB2-associated binding protein 1                           | 0.743 |  |
| GAD2     | Glutamate decarboxylase 2                                   | 0.886 |  |
| GANC     | Glucosidase, alpha; neutral C                               | 0.846 |  |
| GAPVD1   | GTPase activating protein and VPS9 domains 1                | 0.763 |  |
| GATA6    | GATA binding protein 6                                      | 0.871 |  |
| GCC2     | GRIP and coiled-coil domain containing 2                    | 0.923 |  |
| GGPS1    | Geranylgeranyl diphosphate synthase 1                       | 0.918 |  |

|              |                                                                               |              |          |
|--------------|-------------------------------------------------------------------------------|--------------|----------|
| GHITM        | Growth hormone inducible transmembrane protein                                | 0.96         |          |
| GID4         | GID complex subunit 4                                                         | 0.701        |          |
| GLDN         | Gliomedin                                                                     | 0.82         |          |
| GLS          | Glutaminase                                                                   | 0.987        |          |
| <b>GNAQ</b>  | <b>Guanine nucleotide binding protein (G protein), q polypeptide</b>          | <b>0.967</b> | <b>√</b> |
| GNG2         | Guanine nucleotide binding protein (G protein), gamma 2                       | 0.743        |          |
| GOT2         | Glutamic-oxaloacetic transaminase 2, mitochondrial                            | 0.925        |          |
| GPCPD1       | Glycerophosphocholine phosphodiesterase GDE1 homolog ( <i>S. cerevisiae</i> ) | 0.93         |          |
| GPR83        | G protein-coupled receptor 8                                                  | 0.881        |          |
| GRB10        | Growth factor receptor-bound protein 10                                       | 0.851        |          |
| GRIA2        | Glutamate receptor, ionotropic, AMPA 2                                        | 0.896        |          |
| GRK7         | G protein-coupled receptor kinase 7                                           | 0.903        |          |
| GSTCD        | Glutathione S-transferase, C-terminal domain containing                       | 0.818        |          |
| GTPBP3       | GTP binding protein 3 (mitochondrial)                                         | 0.781        |          |
| HAO1         | Hydroxyacid oxidase (glycolate oxidase) 1                                     | 0.796        |          |
| HCN1         | Hyperpolarization activated cyclic nucleotide-gated potassium channel 1       | 0.838        |          |
| HHIP         | Hedgehog interacting protein                                                  | 0.807        |          |
| HIC2         | Hypermethylated in cancer 2                                                   | 0.912        |          |
| HMCN1        | Hemicentin 1                                                                  | 0.918        |          |
| <b>HMGA2</b> | <b>High mobility group AT-hook 2</b>                                          | <b>0.764</b> | <b>√</b> |
| HMGCR        | 3-Hydroxy-3-methylglutaryl-CoA reductase                                      | 0.718        |          |
| HOXA1        | Homeobox A1                                                                   | 0.929        |          |
| HOXD1        | Homeobox D1                                                                   | 0.909        |          |
| HSDL2        | Hydroxysteroid dehydrogenase like 2                                           | 0.753        |          |
| HSPA4L       | Heat shock 70 kDa protein 4-like                                              | 0.756        |          |
| HSPA5        | Heat shock 70 kDa protein 5 (glucose-regulated protein, 78 kDa)               | 0.81         |          |
| IGDCC3       | Immunoglobulin superfamily, DCC subclass, member 3                            | 0.718        |          |
| IGF2BP2      | Insulin-like growth factor 2 mRNA binding protein 2                           | 0.964        |          |
| IKZF5        | IKAROS family zinc finger 5 (Pegasus)                                         | 0.952        |          |
| ING5         | Inhibitor of growth family, member 5                                          | 0.898        |          |
| INO80C       | INO80 complex subunit C                                                       | 0.836        |          |
| IRF2BPL      | Interferon regulatory factor 2 binding protein-like                           | 0.88         |          |
| JMJD1C       | Jumonji domain containing 1C                                                  | 0.856        |          |

|          |                                                                                    |       |   |
|----------|------------------------------------------------------------------------------------|-------|---|
| KCNMA1   | Potassium large conductance calcium-activated channel, subfamily M, alpha member 1 | 0.804 |   |
| KDM3A    | Lysine (K)-specific demethylase 3A                                                 | 0.896 |   |
| KIAA1644 | KIAA1644                                                                           | 0.809 |   |
| KIF3A    | Kinesin family member 3A                                                           | 0.903 |   |
| KL       | Klotho                                                                             | 0.786 |   |
| KLF15    | Kruppel-like factor 15                                                             | 0.877 |   |
| KLF6     | Kruppel-like factor 6                                                              | 0.977 |   |
| KLHL2    | Kelch-like family member 2                                                         | 0.817 |   |
| KLHL5    | Kelch-like family member 5                                                         | 0.995 |   |
| KSR1     | Kinase suppressor of ras 1 D110                                                    | 0.943 |   |
| LCOR     | Ligand dependent nuclear receptor corepressor                                      | 0.943 |   |
| LCP1     | Lymphocyte cytosolic protein 1 (L-plastin)                                         | 0.738 | √ |
| LGI2     | Leucine-rich repeat LGI family, member 2                                           | 0.718 |   |
| LIN28B   | Lin-28 homolog B ( <i>C. elegans</i> )                                             | 0.971 |   |
| LMAN1    | Lectin, mannose-binding, 1                                                         | 0.958 |   |
| LMO3     | LIM domain only 3 (rhombotin-like 2)                                               | 0.945 |   |
| LPGAT1   | Lysophosphatidylglycerol acyltransferase 1                                         | 0.735 |   |
| LRBA     | LPS-responsive vesicle trafficking, beach and anchor containing                    | 0.986 |   |
| LRP12    | Low density lipoprotein receptor-related protein 12                                | 0.81  |   |
| LY75     | Lymphocyte antigen 75                                                              | 0.799 |   |
| MAF      | V-maf avian musculoaponeurotic fibrosarcoma oncogene homolog                       | 0.702 | √ |
| MAOA     | Monoamine oxidase A                                                                | 0.754 |   |
| MAP1B    | Microtubule-associated protein 1B                                                  | 0.991 |   |
| MAP2K1   | Mitogen-activated protein kinase kinase 1                                          | 0.833 | √ |
| MARCH2   | Mitochondrial amidoxime reducing component 2                                       | 0.788 |   |
| MB21D1   | Mab-21 domain containing 1                                                         | 0.865 |   |
| MBLAC2   | Metallo-beta-lactamase domain containing 2                                         | 0.743 |   |
| MBNL1    | Muscleblind-like splicing regulator 1                                              | 0.803 |   |
| MBNL2    | Muscleblind-like splicing regulator 2                                              | 0.789 |   |
| MBOAT2   | Membrane bound O-acyltransferase domain containing 2                               | 0.919 |   |
| MCC      | Mutated in colorectal cancers                                                      | 0.868 |   |
| MCTP1    | Multiple C2 domains, transmembrane 1                                               | 0.861 |   |
| MDFIC    | MyoD family inhibitor domain containing                                            | 0.705 |   |

|          |                                                                                                 |       |   |
|----------|-------------------------------------------------------------------------------------------------|-------|---|
| MED26    | Mediator complex subunit 26                                                                     | 0.897 |   |
| METAP1   | Methionyl aminopeptidase 1                                                                      | 0.977 |   |
| METTL20  | Methyltransferase like 20                                                                       | 0.864 |   |
| MFAP3L   | Microfibrillar-associated protein 3-like                                                        | 0.807 |   |
| MFSD6    | Major facilitator superfamily domain containing 6                                               | 0.867 |   |
| MGA      | MGA, MAX dimerization protein                                                                   | 0.806 |   |
| MIA2     | Melanoma inhibitory activity 2                                                                  | 0.91  |   |
| MIER3    | Mesoderm induction early response 1, family member 3                                            | 0.954 |   |
| MLLT10   | Myeloid/lymphoid or mixed-lineage leukemia (trithorax homolog, Drosophila); translocated to, 10 | 0.969 | √ |
| MME      | Membrane metallo-endopeptidase                                                                  | 0.755 |   |
| MMP16    | Matrix metallopeptidase 16 (membrane-inserted)                                                  | 0.848 |   |
| MMP8     | Matrix metallopeptidase 8 (neutrophil collagenase)                                              | 0.727 |   |
| MOB4     | MOB family member 4, phocein                                                                    | 0.755 |   |
| MRPS35   | Mitochondrial ribosomal protein S35                                                             | 0.785 |   |
| MS4A1    | Membrane-spanning 4-domains, subfamily A, member 1                                              | 0.857 |   |
| MSI2     | Musashi RNA-binding protein 2                                                                   | 0.879 | √ |
| MTF2     | Metal response element binding transcription factor 2                                           | 0.991 |   |
| MTUS1    | Microtubule associated tumor suppressor 1                                                       | 0.774 |   |
| MUC22    | Mucin 22                                                                                        | 0.764 |   |
| MUC7     | Mucin 7, secreted                                                                               | 0.94  |   |
| MYH10    | Myosin, heavy chain 10, non-muscle                                                              | 0.756 |   |
| NAALADL2 | N-acetylated alpha-linked acidic dipeptidase-like 2                                             | 0.723 |   |
| NAPB     | N-ethylmaleimide-sensitive factor attachment protein, beta                                      | 0.762 |   |
| NCOR1    | Nuclear receptor corepressor 1                                                                  | 0.914 | √ |
| NDUFAF4  | NADH dehydrogenase (ubiquinone) complex I, assembly factor 4                                    | 0.724 |   |
| NFYB     | Nuclear transcription factor Y, bet                                                             | 0.845 |   |
| NHLRC2   | NHL repeat containing 2                                                                         | 0.882 |   |
| NLN      | Neurolysin (metallopeptidase M3 family)                                                         | 0.91  |   |
| NMT2     | <i>N</i> -myristoyltransferase 2                                                                | 0.992 |   |
| NOTCH2   | Notch 2                                                                                         | 0.883 | √ |
| NPHP1    | Nephronophthisis 1 (juvenile)                                                                   | 0.754 |   |
| NR4A3    | Nuclear receptor subfamily 4, group A, member 3                                                 | 0.801 | √ |



|         |                                                                    |       |   |
|---------|--------------------------------------------------------------------|-------|---|
| NRCAM   | Neuronal cell adhesion molecule                                    | 0.762 |   |
| NRGN    | Neurogranin (protein kinase C substrate, RC3)                      | 0.852 |   |
| NT5C3   | 5'-nucleotidase, cytosolic IIIA                                    | 0.81  |   |
| NUDT12  | Nudix (nucleoside diphosphate linked moiety X)-type motif 12       | 0.894 |   |
| NUDT19  | Nudix (nucleoside diphosphate linked moiety X)-type motif 19       | 0.713 |   |
| NUFIP1  | Nuclear fragile X mental retardation protein interacting protein 1 | 0.868 |   |
| ODF2L   | Outer dense fiber of sperm tails 2-like                            | 0.805 |   |
| OTOGL   | Otogelin-like                                                      | 0.755 |   |
| PALM2   | Paralemmin 2                                                       | 0.953 |   |
| PAPD5   | PAP associated domain containing 5                                 | 0.997 |   |
| PARK2   | Parkin RBR E3 ubiquitin protein ligase                             | 0.951 |   |
| PARP11  | Poly (ADP-ribose) polymerase family, member 11                     | 0.831 |   |
| PAX5    | Paired box 5                                                       | 0.979 | √ |
| PAX9    | Paired box 9                                                       | 0.736 |   |
| PBX1    | Pre-B-cell leukemia homeobox 1                                     | 0.83  | √ |
| PCDHA2  | Protocadherin alpha 2                                              | 0.723 |   |
| PCDHA3  | Protocadherin alpha 3                                              | 0.724 |   |
| PCDHA4  | Protocadherin alpha 4                                              | 0.723 |   |
| PCDHA6  | Protocadherin alpha                                                | 0.724 |   |
| PCGF3   | Polycomb group ring finger 3                                       | 0.753 |   |
| PCGF5   | Polycomb group ring finger 5                                       | 0.81  |   |
| PCID2   | PCI domain containing 2                                            | 0.805 |   |
| PCNP    | PEST proteolytic signal containing nuclear protein                 | 0.914 |   |
| PCYOX1  | Preylcysteine oxidase 1                                            | 0.81  |   |
| PDE1C   | Phosphodiesterase 1C, calmodulin-dependent 70kDa                   | 0.757 |   |
| PDE8B   | Phosphodiesterase 8B                                               | 0.702 |   |
| PDIK1L  | PDLIM1 interacting kinase 1 like                                   | 0.776 |   |
| PEAK1   | Pseudopodium-enriched atypical kinase 1                            | 0.907 |   |
| PGM2L1  | Phosphoglucomutase 2-like 1                                        | 0.729 |   |
| PHACTR1 | Phosphatase and actin regulator 1                                  | 0.857 |   |
| PHKA1   | Phosphorylase kinase, alpha 1 (muscle)                             | 0.72  |   |
| PHLPP2  | PH domain and leucine rich repeat protein phosphatase 2            | 0.745 |   |
| PHOX2B  | Paired-like homeobox 2b                                            | 0.881 | √ |

|          |                                                                                              |       |   |
|----------|----------------------------------------------------------------------------------------------|-------|---|
| PIAS2    | Protein inhibitor of activated STAT, 2                                                       | 0.779 |   |
| PIAS3    | Protein inhibitor of activated STAT, 3                                                       | 0.7   |   |
| PIK3C3   | Phosphatidylinositol 3-kinase, catalytic subunit type 3                                      | 0.706 |   |
| PIK3R3   | Phosphoinositide-3-kinase, regulatory subunit 3 (g)                                          | 0.907 |   |
| PKD2     | Polycystic kidney disease 2 (autosomal dominant)                                             | 0.907 |   |
| PKD2L2   | Polycystic kidney disease 2-like 2                                                           | 0.739 |   |
| PKHD1    | Polycystic kidney and hepatic disease 1 (autosomal recessive)                                | 0.933 |   |
| PKNOX1   | PBX/knotted 1 homeobox 1                                                                     | 0.869 |   |
| PLAU     | Plasminogen activator, urokinase                                                             | 0.772 |   |
| PLCL2    | Phospholipase C-like 2                                                                       | 0.972 |   |
| PLEKHA1  | Pleckstrin homology domain containing, family A (phosphoinositide binding specific) member 1 | 0.704 |   |
| PMS1     | PMS1 postmeiotic segregation increased 1 ( <i>S. cerevisiae</i> )                            | 0.79  | √ |
| PNRC2    | Proline-rich nuclear receptor coactivator 2                                                  | 0.853 |   |
| PPARGC1A | Peroxisome proliferator-activated receptor gamma, coactivator 1 alpha                        | 0.823 |   |
| PPM1A    | Protein phosphatase, Mg <sup>2+</sup> /Mn <sup>2+</sup> dependent, 1A                        | 0.83  |   |
| PPP1R9A  | Protein phosphatase 1, regulatory subunit 9A                                                 | 0.758 |   |
| PPP2R5E  | Protein phosphatase 2, regulatory subunit B', epsilon isoform                                | 0.87  |   |
| PRDM1    | PR domain containing 1, with ZNF domain                                                      | 0.883 | √ |
| PRDM5    | PR domain containing 5                                                                       | 0.751 |   |
| PREX2    | Phosphatidylinositol-3,4,5-trisphosphate-dependent Rac exchange factor 2                     | 0.784 |   |
| PRLR     | Prolactin receptor                                                                           | 0.957 |   |
| PRRG4    | Proline rich Gla (G-carboxyglutamic acid) 4 (transmembrane)                                  | 0.913 |   |
| PSG11    | Pregnancy-specific b1-glycoprotein 11 Precursor                                              | 0.891 |   |
| PSMC2    | Proteasome (prosome, macropain) 26S subunit, ATPase, 2                                       | 0.882 |   |
| PTBP2    | Polypyrimidine tract binding protein 2                                                       | 0.742 |   |
| PTEN     | Phosphatase and tensin homolog                                                               | 0.883 | √ |
| PTGER3   | Prostaglandin E receptor 3 (subtype EP3)                                                     | 0.76  |   |
| PTGS2    | Prostaglandin-endoperoxide synthase 2 (prostaglandin G/H synthase and cyclooxygenase)        | 0.895 |   |
| PTPN3    | Protein tyrosine phosphatase, non-receptor type 3                                            | 0.722 |   |
| PTPRT    | Protein tyrosine phosphatase, receptor type, T                                               | 0.879 |   |
| PUM1     | Pumilio RNA-binding family member 1                                                          | 0.945 |   |

|              |                                                                                                                  |       |  |
|--------------|------------------------------------------------------------------------------------------------------------------|-------|--|
| RAB27B       | RAB27B, member RAS oncogene family                                                                               | 0.857 |  |
| RAB8B        | RAB8B, member RAS oncogene family                                                                                | 0.822 |  |
| RABGEF1      | RAB guanine nucleotide exchange factor (GEF) 1                                                                   | 0.772 |  |
| RABL5        | Intraflagellar transport 22                                                                                      | 0.779 |  |
| RAD23B       | RAD23 homolog B ( <i>S. cerevisiae</i> )+B346                                                                    | 0.794 |  |
| RALGAPA2     | Ral GTPase activating protein, alpha subunit 2 (catalytic)                                                       | 0.801 |  |
| RAP1A        | RAP1A, member of RAS oncogene family                                                                             | 0.827 |  |
| RASSF1       | Ras association (RalGDS/AF-6) domain family member 1                                                             | 0.772 |  |
| RASSF2       | Ras association (RalGDS/AF-6) domain family member 2                                                             | 0.789 |  |
| RASSF8       | Ras association (RalGDS/AF-6) domain family (N-terminal) member 8                                                | 0.779 |  |
| RBM26        | RNA binding motif protein 26                                                                                     | 0.981 |  |
| RBM46        | RNA binding motif protein 46                                                                                     | 0.933 |  |
| RCN2         | Reticulocalbin 2, EF-hand calcium binding domain                                                                 | 0.716 |  |
| REPS2        | RALBP1 associated Eps domain containing 2                                                                        | 0.989 |  |
| RFTN2        | Raftlin family member 2                                                                                          | 0.762 |  |
| RFX2         | Regulatory factor X, 2 (influences HLA class II expression)                                                      | 0.786 |  |
| RIMBP3B      | RIMS binding protein 3B                                                                                          | 0.723 |  |
| RLF          | Rearranged L-myc fusion                                                                                          | 0.994 |  |
| RNF6         | Ring finger protein (C3H2C3 type) 6                                                                              | 0.953 |  |
| RNF7         | Ring finger protein 7                                                                                            | 0.742 |  |
| ROCK2        | Rho-associated, coiled-coil containing protein kinase 2                                                          | 0.757 |  |
| RP3-324N14.2 | Small leucine-rich protein 1                                                                                     | 0.939 |  |
| RPL23        | Ribosomal protein L23                                                                                            | 0.87  |  |
| RPS6KB1      | Ribosomal protein S6 kinase, 70 kDa, polypeptide 1                                                               | 0.94  |  |
| RSBN1        | Round spermatid basic protein 1                                                                                  | 0.745 |  |
| RSPO2        | R-spondin 2                                                                                                      | 0.928 |  |
| SAMD4A       | Sterile alpha motif domain containing 4A                                                                         | 0.947 |  |
| SBNO1        | Strawberry notch homolog 1 ( <i>Drosophila</i> )                                                                 | 0.769 |  |
| SEMA4G       | Sema domain, immunoglobulin domain (Ig), transmembrane domain (TM) and short cytoplasmic domain, (semaphorin) 4G | 0.933 |  |
| SEN1         | SUMO1/sentrin specific peptidase 1                                                                               | 0.828 |  |
| SEN2         | SUMO1/sentrin/SMT3 specific peptidase 2                                                                          | 0.876 |  |
| SEN7         | SUMO1/sentrin specific peptidase 7                                                                               | 0.751 |  |

|          |                                                                                             |       |  |
|----------|---------------------------------------------------------------------------------------------|-------|--|
| SERP1    | Stress-associated endoplasmic reticulum protein 1                                           | 0.801 |  |
| SERTAD2  | SERTA domain containing 2                                                                   | 0.824 |  |
| SESN3    | Sestrin 3                                                                                   | 0.992 |  |
| SETP8    | Septin 8                                                                                    | 0.827 |  |
| SHROOM3  | Shroom family member 3                                                                      | 0.708 |  |
| SIAE     | Sialic acid acetyltransferase                                                               | 0.808 |  |
| SKAP2    | Src kinase associated phosphoprotein 2                                                      | 0.767 |  |
| SKP1     | S-phase kinase-associated protein 1                                                         | 0.838 |  |
| SLC11A1  | Solute carrier family 11 (proton-coupled divalent metal ion transporter), member 1          | 0.725 |  |
| SLC12A2  | Solute carrier family 12 (sodium/potassium/chloride transporter), member 2                  | 0.764 |  |
| SLC24A3  | Solute carrier family 24 (sodium/potassium/calcium exchanger), member 3                     | 0.771 |  |
| SLC25A25 | Solute carrier family 25 (mitochondrial carrier; phosphate carrier), member 25              | 0.754 |  |
| SLC25A37 | Solute carrier family 25 (mitochondrial iron transporter), member 37                        | 0.894 |  |
| SLC26A4  | Solute carrier family 26 (anion exchanger), member 4                                        | 0.837 |  |
| SLC2A3   | Solute carrier family 2 (facilitated glucose transporter), member 3                         | 0.982 |  |
| SLC38A11 | Solute carrier family 38, member 11                                                         | 0.832 |  |
| SLC38A2  | Solute carrier family 38, member 2                                                          | 0.876 |  |
| SLC6A6   | Solute carrier family 6                                                                     | 0.875 |  |
| SLC7A11  | Solute carrier family 7 (anionic amino acid transporter light chain, xc- system), member 11 | 0.863 |  |
| SLC7A2   | Solute carrier family 7 (cationic amino acid transporter, y+ system), member 2              | 0.772 |  |
| SLITRK1  | SLIT and NTRK-like family, member 1                                                         | 0.982 |  |
| SLITRK2  | SLIT and NTRK-like family, member 2                                                         | 0.927 |  |
| SMAD5    | SMAD family member 5                                                                        | 0.734 |  |
| SMG1     | SMG1 phosphatidylinositol 3-kinase-related kinase                                           | 0.742 |  |
| SMG7     | SMG7 nonsense mediated mRNA decay factor                                                    | 0.769 |  |
| SMN1     | Survival of motor neuron 1, telomeric                                                       | 0.882 |  |
| SNN      | Stannin                                                                                     | 0.954 |  |
| SNTN     | Sentan, cilia apical structure protein                                                      | 0.754 |  |
| SNX5     | Sorting nexin 5                                                                             | 0.753 |  |
| SOCS3    | Suppressor of cytokine signaling 3                                                          | 0.76  |  |
| SORT1    | Sortilin 1                                                                                  | 0.703 |  |
| SOS1     | Son of sevenless homolog 1 (Drosophila)                                                     | 0.797 |  |

|         |                                                                                  |       |   |
|---------|----------------------------------------------------------------------------------|-------|---|
| SOWAHA  | Sosondowah ankyrin repeat domain family member A                                 | 0.954 |   |
| SOX5    | SRY (sex determining region Y)-box 5                                             | 0.872 |   |
| SPAG16  | Sperm associated antigen 16                                                      | 0.781 |   |
| SPI1    | Spi-1 proto-oncogene                                                             | 0.885 |   |
| SPP1    | Secreted phosphoprotein 1                                                        | 0.98  |   |
| SRFBP1  | Serum response factor binding protein 1                                          | 0.763 |   |
| SRGN    | Serglycin                                                                        | 0.794 |   |
| SS18L1  | Synovial sarcoma translocation gene on chromosome 18-like 1                      | 0.914 | √ |
| SS18L2  | Synovial sarcoma translocation gene on chromosome 18-like 2                      | 0.901 |   |
| STAG2   | Stromal antigen 2                                                                | 0.721 | √ |
| STEAP4  | STEAP family member 4                                                            | 0.814 |   |
| STT3B   | STT3B, subunit of the oligosaccharyltransferase complex (catalytic)              | 0.792 |   |
| STX7    | Syntaxin 7                                                                       | 0.856 |   |
| STXBP4  | Syntaxin binding protein 4                                                       | 0.82  |   |
| SUDS3   | Suppressor of defective silencing 3 homolog ( <i>S. cerevisiae</i> )             | 0.725 |   |
| SVIP    | Small VCP/p97-interacting protein                                                | 0.875 |   |
| SYNC    | Syncoilin, intermediate filament protein                                         | 0.716 |   |
| SYNRG   | Synergin, gamma                                                                  | 0.718 |   |
| TACSTD2 | Tumor-associated calcium signal transducer 2                                     | 0.801 |   |
| TAOK1   | TAO kinase 1                                                                     | 0.822 |   |
| TBC1D14 | TBC1 domain family, member 14                                                    | 0.803 |   |
| TBC1D9  | TBC1 domain family, member 9 (with GRAM domain)                                  | 0.768 |   |
| TBL1X   | Transducin (beta)-like 1X-linked                                                 | 0.745 |   |
| TBPL1   | TBP-like 1                                                                       | 0.949 |   |
| TCEANC  | Transcription elongation factor A (SII) N-terminal and central domain containing | 0.842 |   |
| TCEB1   | Transcription elongation factor B (SIII), polypeptide 1 (15 kDa, elongin C)      | 0.768 |   |
| TEAD1   | TEA domain family member 1                                                       | 0.872 |   |
| TG      | Thyroglobulin                                                                    | 0.8   |   |
| TGFBI   | Transforming growth factor, beta-induced, 68 kDa                                 | 0.757 |   |
| THEMIS  | Thymocyte selection associated                                                   | 0.781 |   |
| THUMPD1 | THUMP domain containing 1                                                        | 0.872 |   |
| TIMP3   | TIMP metalloproteinase inhibitor 3                                               | 0.976 |   |
| TLK2    | Tousled-like kinase 2                                                            | 0.765 |   |

|               |                                                                        |              |          |
|---------------|------------------------------------------------------------------------|--------------|----------|
| TLL2          | Tolloid-like 2                                                         | 0.728        |          |
| TMED4         | Transmembrane emp24 protein transport domain containing 4              | 0.871        |          |
| TMEM123       | Transmembrane protein 123                                              | 0.739        |          |
| TMEM131       | Transmembrane protein 131                                              | 0.992        |          |
| TMEM135       | Transmembrane protein 135                                              | 0.844        |          |
| TMEM178B      | Transmembrane protein 178B                                             | 0.834        |          |
| TMEM194A      | Transmembrane protein 194A                                             | 0.901        |          |
| TMEM26        | Transmembrane protein 26                                               | 0.88         |          |
| TMEM30A       | Transmembrane protein 30A                                              | 0.785        |          |
| TMEM48        | NDC1 transmembrane nucleoporin                                         | 0.906        |          |
| TNFRSF11A     | Tumor necrosis factor receptor superfamily, member 11a, NFKB activator | 0.922        |          |
| TNIK          | TRAF2 and NCK interacting kinase                                       | 0.936        |          |
| TNKS          | Tankyrase, TRF1-interacting ankyrin-related ADP-ribose polymerase      | 0.758        |          |
| TNS1          | Tensin 1                                                               | 0.884        |          |
| TPH2          | Tryptophan hydroxylase 2                                               | 0.782        |          |
| TPRX1         | Tetra-peptide repeat homeobox 1                                        | 0.935        |          |
| TREML4        | Triggering receptor expressed on myeloid cells-like 4                  | 0.753        |          |
| TRIM2         | Tripartite motif containing 2                                          | 0.995        |          |
| <b>TRIM33</b> | <b>Tripartite motif containing 33</b>                                  | <b>0.798</b> | <b>√</b> |
| TRNP1         | TMF1-regulated nuclear protein                                         | 0.751        |          |
| TRPC6         | Transient receptor potential cation channel, subfamily C, member 6     | 0.701        |          |
| TSMF          | Ts translation elongation factor, mitochondrial                        | 0.721        |          |
| TTBK1         | Tau tubulin kinase 1                                                   | 0.93         |          |
| TUBAL3        | Tubulin, alpha-like 3                                                  | 0.758        |          |
| TWISTNB       | TWIST neighbor                                                         | 0.844        |          |
| TYW5          | tRNA-yW synthesizing protein 5                                         | 0.718        |          |
| UBE2W         | Ubiquitin-conjugating enzyme E2W (putative)                            | 0.843        |          |
| UBR1          | Ubiquitin protein ligase E3 component n-recognin 1                     | 0.707        |          |
| UBR3          | Ubiquitin protein ligase E3 component n-recognin 3 (putative)          | 0.721        |          |
| UGT8          | UDP glycosyltransferase 8                                              | 0.805        |          |
| USP15         | Ubiquitin specific peptidase 15                                        | 0.896        |          |
| USP6NL        | USP6 N-terminal like                                                   | 0.768        |          |
| VCAM1         | Vascular cell adhesion molecule 1                                      | 0.759        |          |

|         |                                                                             |       |   |
|---------|-----------------------------------------------------------------------------|-------|---|
| VCY     | Variable charge, Y-linked 1B                                                | 0.852 |   |
| VIP     | Vasoactive intestinal peptide                                               | 0.848 |   |
| VPS33B  | Vacuolar protein sorting 33 homolog B (yeast)                               | 0.747 |   |
| WASL    | Wiskott-Aldrich syndrome-like                                               | 0.964 |   |
| WDR75   | WD repeat domain 75                                                         | 0.945 |   |
| WDR82   | WD repeat domain 82                                                         | 0.873 |   |
| WDR96   | Cilia and flagella associated protein 43                                    | 0.893 |   |
| WHAMM   | WAS protein homolog associated with actin, golgi membranes and microtubules | 0.936 |   |
| WHSC1   | Wolf-Hirschhorn syndrome candidate 1                                        | 0.704 | √ |
| WIF1    | WNT inhibitory factor 1                                                     | 0.947 | √ |
| XKR3    | XK, Kell blood group complex subunit-related family, member 3               | 0.849 |   |
| XPO1    | Exportin 1                                                                  | 0.939 | √ |
| XPO7    | Exportin 7                                                                  | 0.806 |   |
| YTHDC2  | YTH domain containing 2                                                     | 0.952 |   |
| ZBTB34  | Zinc finger and BTB domain containing 34                                    | 0.872 |   |
| ZBTB4   | Zinc finger and BTB domain containing 4                                     | 0.975 |   |
| ZDHHC17 | Zinc finger, DHHC-type containing 17                                        | 0.857 |   |
| ZFP3    | ZFP3 zinc finger protein                                                    | 0.791 |   |
| ZFP30   | ZFP30 zinc finger protein                                                   | 0.849 |   |
| ZFP36L1 | ZFP36 ring finger protein-like 1                                            | 0.979 |   |
| ZFP37   | ZFP37 zinc finger protein                                                   | 0.969 |   |
| ZFP90   | ZFP90 zinc finger protein                                                   | 0.982 |   |
| ZNF107  | Zinc finger protein 107                                                     | 0.717 |   |
| ZNF12   | Zinc finger protein 12                                                      | 0.953 |   |
| ZNF131  | Zinc finger protein 131                                                     | 0.949 |   |
| ZNF146  | Zinc finger protein 146                                                     | 0.737 |   |
| ZNF148  | Zinc finger protein 148                                                     | 0.842 |   |
| ZNF184  | Zinc finger protein 184                                                     | 0.871 |   |
| ZNF24   | Zinc finger protein 24                                                      | 0.713 |   |
| ZNF266  | Zinc finger protein 266                                                     | 0.944 |   |
| ZNF268  | Zinc finger protein 268                                                     | 0.997 |   |
| ZNF274  | Zinc finger protein 274                                                     | 0.741 |   |
| ZNF292  | Zinc finger protein 292                                                     | 0.908 |   |

|        |                               |       |  |
|--------|-------------------------------|-------|--|
| ZNF347 | Zinc finger protein 347       | 0.737 |  |
| ZNF419 | Zinc finger protein 419       | 0.792 |  |
| ZNF432 | Zinc finger protein 432       | 0.811 |  |
| ZNF436 | Zinc finger protein 436       | 0.839 |  |
| ZNF440 | Zinc finger protein 440       | 0.948 |  |
| ZNF441 | Zinc finger protein 441       | 0.989 |  |
| ZNF442 | Zinc finger protein 442       | 0.767 |  |
| ZNF493 | Zinc finger protein 493       | 0.889 |  |
| ZNF510 | Zinc finger protein 510       | 0.911 |  |
| ZNF514 | Zinc finger protein 514       | 0.879 |  |
| ZNF527 | Zinc finger protein 527       | 0.993 |  |
| ZNF546 | Zinc finger protein 546       | 0.873 |  |
| ZNF551 | Zinc finger protein 551       | 0.755 |  |
| ZNF567 | Zinc finger protein 567       | 0.859 |  |
| ZNF570 | Zinc finger protein 570       | 1     |  |
| ZNF583 | Zinc finger protein 583       | 0.875 |  |
| ZNF594 | Zinc finger protein 594       | 0.966 |  |
| ZNF610 | Zinc finger protein 610       | 0.71  |  |
| ZNF638 | Zinc finger protein 638       | 0.79  |  |
| ZNF677 | Zinc finger protein 677       | 0.934 |  |
| ZNF704 | Zinc finger protein 704       | 0.997 |  |
| ZNF709 | Zinc finger protein 709       | 0.942 |  |
| ZNF711 | Zinc finger protein 711       | 0.796 |  |
| ZNF717 | Zinc finger protein 717       | 0.982 |  |
| ZNF720 | Zinc finger protein 720       | 0.977 |  |
| ZNF74  | Zinc finger protein 74        | 0.751 |  |
| ZNF770 | zinc finger protein 770       | 0.733 |  |
| ZNF776 | Zinc finger protein 776       | 0.85  |  |
| ZNF781 | Zinc finger protein 781       | 1     |  |
| ZNF788 | Zinc finger family member 788 | 0.996 |  |
| ZNF799 | Zinc finger protein 799       | 0.997 |  |
| ZNF841 | Zinc finger protein 841       | 0.736 |  |
| ZNF844 | Zinc finger protein 844       | 0.951 |  |



|         |                                              |       |  |
|---------|----------------------------------------------|-------|--|
| ZNF846  | Zinc finger protein 846                      | 0.994 |  |
| ZNF850  | Zinc finger protein 850                      | 0.881 |  |
| ZNRF2   | Zinc and ring finger 2                       | 0.88  |  |
| ZSCAN23 | Zinc finger and SCAN domain containing 23    | 0.877 |  |
| ZYG11B  | Zyg-11 family member B, cell cycle regulator | 0.705 |  |

**Supplementary Table 3. Predicted targets of hsa-miR-181a-5p by DIANA microT v 5.0.**

| Gene symbol | Full name                                                                                  | Alias                                                         | Cancer gene |
|-------------|--------------------------------------------------------------------------------------------|---------------------------------------------------------------|-------------|
| A2BP1       |                                                                                            |                                                               |             |
| A2ML1       | Alpha-2-macroglobulin-like 1                                                               | CPAMD9                                                        |             |
| AADACL3     | Arylacetamide deacetylase-like 3                                                           | RP11-474O21.3                                                 |             |
| AAK1        | AP2 associated kinase 1                                                                    | RP11-427H3.3                                                  |             |
| AANAT       | Aralkylamine N-acetyltransferase                                                           | DSPS, SNAT                                                    |             |
| AASDH       | Amino adipate-semialdehyde dehydrogenase                                                   | HSPC318, ACSF4, LYS2, NRPS1098, NRPS998                       |             |
| AASDHPPT    | <del>Amino adipate-semialdehyde dehydrogenase-<br/>chromophore-thioester transferase</del> | CGI-80, AASD-PPT, LYS2, LYS5                                  |             |
| AASS        | Amino adipate-semialdehyde synthase                                                        | LKR/SDH, LKRSDH, LORS DH                                      |             |
| ABCA1       | <del>ATP-binding cassette, sub-family A (ABC1),<br/>member 1</del>                         | ABC-1, ABC1, CERP, HDLDT1, TGD                                |             |
| ABCA10      | <del>ATP-binding cassette, sub-family A (ABC1),<br/>member 10</del>                        | EST698739                                                     |             |
| ABCA11P     | <del>ATP-binding cassette, sub-family A (ABC1),<br/>member 11</del>                        |                                                               |             |
| ABCA13      | <del>ATP-binding cassette, sub-family A (ABC1),<br/>member 13</del>                        |                                                               |             |
| ABCA5       | <del>ATP-binding cassette, sub-family A (ABC1),<br/>member 5</del>                         | ABC13, EST90625                                               |             |
| ABCA6       | <del>ATP-binding cassette, sub-family A (ABC1),<br/>member 6</del>                         | EST155051                                                     |             |
| ABCB1       | <del>ATP-binding cassette, sub-family B<br/>(ABC2/ABC3) member 1</del>                     | ABC20, CD243, CLCS, GP170, MDR1, P-GP, PGY1                   |             |
| ABCB10      | <del>ATP-binding cassette, sub-family B<br/>(ABC2/ABC3) member 10</del>                    | EST20237, M-ABC2, MTABC2                                      |             |
| ABCB11      | <del>ATP-binding cassette, sub-family B<br/>(ABC2/ABC3) member 11</del>                    | ABC16, BRIC2, BSEP, PFIC-2, PFIC2, PGY4, SPGP                 |             |
| ABCB5       | <del>ATP-binding cassette, sub-family B<br/>(ABC2/ABC3) member 5</del>                     | tcag7.1091alpha, ABCB5beta, EST422562, ABCB5                  |             |
| ABCD3       | <del>ATP-binding cassette, sub-family D (ALD),<br/>member 3</del>                          | ABC43, PMP70, PXMP1, ZWS2                                     |             |
| ABCG5       | <del>ATP-binding cassette, sub-family G<br/>(WHITE) member 5</del>                         | STSL                                                          |             |
| ABHD12B     | Abhydrolase domain containing 12B                                                          | BEM46L3, C14orf29, c14_5314                                   |             |
| ABHD13      | Abhydrolase domain containing 13                                                           | RP11-153I24.2, BEM46L1, C13orf6, bA153I24.2                   |             |
| ABHD15      | Abhydrolase domain containing 15                                                           | UNQ6510/PRO21435                                              |             |
| ABHD2       | Abhydrolase domain containing 2                                                            | HS1-2, LABH2, PHPS1-2                                         |             |
| ABHD3       | Abhydrolase domain containing 3                                                            | LABH3                                                         |             |
| ABHD4       | Abhydrolase domain containing 4                                                            | ABH4                                                          |             |
| ABHD5       | Abhydrolase domain containing 5                                                            | CGI-58, CDS, CGI58, IECN2, NCIE2                              |             |
| ABI1        | Abl-interactor 1                                                                           | NP15-101111.4, ADF1, ADEL14, ESD1, NAT101,<br>SSH2BP, SSH2BP1 | √           |
| ABI2        | Abl-interactor 2                                                                           | ADP1, ADF1, ADF1C, SSH2BP2, argD11, argD11A,<br>SSH2BP, ADF2  |             |
| ABI3BP      | ADP family, member 3 (NESH) binding<br>protein                                             | NESHBP, TARSH                                                 |             |
| ABL1        | ABL proto-oncogene 1, non-receptor<br>tyrosine kinase                                      | NP11-65521.1, ABL, JTK7, UCI/abl, C-ABL, C-ABL1,<br>c150-abl  | √           |

|        |                                                                                   |                                                                |   |
|--------|-----------------------------------------------------------------------------------|----------------------------------------------------------------|---|
| ABL2   | ABL proto-oncogene 2, non-receptor tyrosine kinase                                | RP11-177A2.3, ABL1, ARG                                        | v |
| ABLIM1 | Actin binding LIM protein 1                                                       | RP11-317F20.1, ABLIM, LIMAB1, LIMATIN, abLIM-1                 |   |
| ABRA   | Actin-binding Rho activating protein                                              | STARS                                                          |   |
| ABTB2  | Ankyrin repeat and BTB (POZ) domain containing 2                                  | RP1-53C18.4A, BTBD22, ABTB2                                    |   |
| ACACB  | Acetyl-CoA carboxylase beta                                                       | ACC2, ACCB, HACC275                                            |   |
| ACAD11 | Acyl-CoA dehydrogenase family, member 11                                          | ACAD-11                                                        |   |
| ACAD8  | Acyl-CoA dehydrogenase family, member 8                                           | ACAD-8, ARC42                                                  |   |
| ACADL  | Acyl-CoA dehydrogenase, long chain                                                | ACAD4, LCAD                                                    |   |
| ACADM  | Acyl-CoA dehydrogenase, C-4 to C-12 straight chain                                | RP4-682C21.1, ACAD1, MCAD, MCADH                               |   |
| ACADVL | Acyl-CoA dehydrogenase, very long chain                                           | ACAD6, LCACD, VLCAD                                            |   |
| ACAN   | Aggrecan                                                                          | AGC1, AGCAN, CSPG1, CSPGCP, MSK16, SEDK                        |   |
| ACAP2  | ANKRD1 with coiled-coil, ankyrin repeat and PH domains 2                          | CENTB2, CNT-B2                                                 |   |
| ACBD3  | Acyl-CoA binding domain containing 3                                              | GCP60, GOCAP1, GOLPH1, PAP7                                    |   |
| ACBD4  | Acyl-CoA binding domain containing 4                                              | HMFT0700                                                       |   |
| ACBD7  | Acyl-CoA binding domain containing 7                                              | RP11-455B2.6, bA455B2.2                                        |   |
| ACCN2  | Acid-sensing (proton-gated) ion channel 1                                         | ACCN2, ASIC, BNaC2                                             |   |
| ACCS   | L-aminocyclopropane-L-carboxylate synthase homolog (Arabidopsis) (non-functional) | ACS, PHACS                                                     |   |
| ACE    | Angiotensin I converting enzyme                                                   | ACE1, CD143, DCP, DCP1, ICH, MVCD3                             |   |
| ACE2   | Angiotensin I converting enzyme 2                                                 | UNQ868/PRO1885, ACEH                                           |   |
| ACER3  | Alkaline ceramidase 3                                                             | APHC, PHCA                                                     |   |
| ACLY   | ATP citrate lyase                                                                 | ACL, ATPCL, CLATP                                              |   |
| ACMSD  | Aminocarboxymuconate semialdehyde decarboxylase                                   |                                                                |   |
| ACN9   | ACN9 homolog ( <i>S. cerevisiae</i> )                                             | DC11                                                           |   |
| ACO1   | Aconitase 1, soluble                                                              | RP11-554F12.1, ACO1S, HELL00, IKED1, IKED1, IDERD1, IDERD1     |   |
| ACOT11 | Acyl-CoA thioesterase 11                                                          | BFIT, STARD14, THEA, THEM1                                     |   |
| ACOT8  | Acyl-CoA thioesterase 8                                                           | RP3-557OT6.2, HNAAC1E, F1E-1, F1E-2, F1E1, F1E2, LACTE III LTF |   |
| ACOX1  | Acyl-CoA oxidase 1, palmitoyl                                                     | ACOX, PALMCOX, SCOX                                            |   |
| ACOX3  | Acyl-CoA oxidase 3, pristanoyl                                                    |                                                                |   |
| ACP1   | Acid phosphatase 1, soluble                                                       | HAAP                                                           |   |
| ACP5   | Acid phosphatase 5, tartrate resistant                                            | SPENCDI, TRAP                                                  |   |
| ACPP   | Acid phosphatase, prostate                                                        | 5'-NT, ACP-3, ACP3                                             |   |
| ACSF3  | Acyl-CoA synthetase family member 3                                               | PSEC0197                                                       |   |
| ACSL1  | Acyl-CoA synthetase long-chain family member 1                                    | ACS1, FAACL1, FAACL2, LACS, LACS1, LACS2                       |   |

|        |                                              |                                                                |   |
|--------|----------------------------------------------|----------------------------------------------------------------|---|
| ACSL3  | Acyl-CoA synthetase long-chain family        | ACS3, FACL3, PRO2194                                           | v |
| ACSL4  | Acyl-CoA synthetase long-chain family        | ACS4, FACL4, LACS4, MRX63, MRX68                               |   |
| ACSM2A | Acyl-CoA synthetase medium-chain family      | A-923A4.1, ACSM2                                               |   |
| ACSM2B | Acyl-CoA synthetase medium-chain family      | HYST1046, ACSM2, HXMA                                          |   |
| ACSM5  | Acyl-CoA synthetase medium-chain family      |                                                                |   |
| ACSS1  | Acyl-CoA synthetase short-chain family       | RP4-568C11.1, ACAS2L, ACECS1, AceCS2L                          |   |
| ACSS3  | Acyl-CoA synthetase short-chain family       |                                                                |   |
| ACTA2  | Actin, alpha 2, smooth muscle, aorta         | GIG46, AAT6, ACTSA, MYMY5                                      |   |
| ACTC1  | Actin, alpha, cardiac muscle 1               | ACTC, ASD5, CMD1R, CMH11, LVNC4                                |   |
| ACTL6A | Actin-like 6A                                | ACTL6, ARPN-BETA, Arp4, BAF53A, INO80K                         |   |
| ACTN2  | Actinin, alpha 2                             | CMD1AA                                                         |   |
| ACTR10 | Actin-related protein 10 homolog (S. pombe)  | ACTR11, Arp11, HARP11                                          |   |
| ACTR2  | Actin-related protein 2 homolog (S. pombe)   | ARP2                                                           |   |
| ACTR3B | Actin-related protein 3 homolog B (S. pombe) | ARP11, ARP3BETA                                                |   |
| ACTR6  | Actin-related protein 6 homolog (S. pombe)   | CDA12, ARP6, HSPC281, MSTP136, hARP6, hARPX                    |   |
| ACTRT1 | Actin-related protein T1                     | RP1-203C2.1, AIP1, ARIP1, ARPT1, HSD27                         |   |
| ACVR1B | Activin A receptor, type IB                  | ACTRIB, ACVRLK4, ALK4, SKR2                                    |   |
| ACVR1C | Activin A receptor, type IC                  | ACVRLK7, ALK7                                                  |   |
| ACVR2A | Activin A receptor, type IIA                 | ACTRII, ACVR2                                                  |   |
| ACVR2B | Activin A receptor, type IIB                 | ACTRIIB, ActR-IIB, HTX4                                        |   |
| ACVRL1 | Activin A receptor type II-like 1            | ACVRLK1, ALK-1, ALK1, HHT1, HHT2, ORW2, SKK3, TSP1             |   |
| ACYP1  | Acylphosphatase 1, Erythrocyte (common)      | ACYPE                                                          |   |
| ADAL   | Adenosine deaminase-like                     |                                                                |   |
| ADAM10 | ADAM metallopeptidase domain 10              | AD10, AD18, CD156c, HsT18717, MADM, RAK, kuz                   |   |
| ADAM11 | ADAM metallopeptidase domain 11              | MDC                                                            |   |
| ADAM12 | ADAM metallopeptidase domain 12              | NP11-29555.5-011, CAR10, MCMI1, MCMI1M11a, MLTN, MLTNA, ADAM12 |   |
| ADAM15 | ADAM metallopeptidase domain 15              | RP11-540D14.1, MDC15                                           |   |
| ADAM18 | ADAM metallopeptidase domain 18              | UNQ858/PRO1867, ADAM27, tMDCIII                                |   |
| ADAM19 | ADAM metallopeptidase domain 19              | FKSG34, MADDAM, MLTNB                                          |   |
| ADAM2  | ADAM metallopeptidase domain 2               | CRTN1, CRTN2, CTT3, F11NB, F11-500, F1150, F1150-1a6           |   |
| ADAM23 | ADAM metallopeptidase domain 23              | MDC-3, MDC3                                                    |   |
| ADAM28 | ADAM metallopeptidase domain 28              | ADAM28, ADAM23, MDC-L, MDC-LIII, MDC-LS, MDCI, MDC II, MDCII   |   |
| ADAM5P | ADAM metallopeptidase domain 5, pseudogene   | ADAM5P, TMDCII                                                 |   |

|          |                                                            |                                                                                  |  |
|----------|------------------------------------------------------------|----------------------------------------------------------------------------------|--|
| ADAM7    | ADAM metalloproteinase domain 7                            | ADAM 7, ADAM-7, EAPI, GP-83, GP83                                                |  |
| ADAM9    | ADAM metalloproteinase domain 9                            | CORD9, MCMP, MDC9, Mltng                                                         |  |
| ADAMTS1  | ADAM metalloproteinase with thrombospondin type 1 motif 1  | C3-C5, METH1                                                                     |  |
| ADAMTS13 | ADAM metalloproteinase with thrombospondin type 1 motif 13 | UNQ01027/KOZ0085, ADAM-TS13, ADAMTS-13, CO-88, WVECB, WVE CB                     |  |
| ADAMTS14 | ADAM metalloproteinase with thrombospondin type 1 motif 14 | RP11-399N22.5                                                                    |  |
| ADAMTS17 | ADAM metalloproteinase with thrombospondin type 1 motif 17 |                                                                                  |  |
| ADAMTS18 | ADAM metalloproteinase with thrombospondin type 1 motif 18 | ADAMTS21, KNO2, MMCAT                                                            |  |
| ADAMTS19 | ADAM metalloproteinase with thrombospondin type 1 motif 19 |                                                                                  |  |
| ADAMTS3  | ADAM metalloproteinase with thrombospondin type 1 motif 3  | ADAMTS-4                                                                         |  |
| ADAMTS5  | ADAM metalloproteinase with thrombospondin type 1 motif 5  | ADAM-TS 11, ADAM-TS 5, ADAM-TS5, ADAMTS-11, ADAMTS 5, ADAMTS11, ADMP 2           |  |
| ADAMTS6  | ADAM metalloproteinase with thrombospondin type 1 motif 6  | ADAM-TS 6, ADAM-TS6, ADAMTS-6                                                    |  |
| ADAMTS8  | ADAM metalloproteinase with thrombospondin type 1 motif 8  | ADAM-TS8, METH2                                                                  |  |
| ADAMTS9  | ADAM metalloproteinase with thrombospondin type 1 motif 9  |                                                                                  |  |
| ADAMTSL1 | ADAMTS-like 1                                              | RP11-220B22.2, ADAMTSL-1, ADAMTSK1, C90H94, PUNGTIN                              |  |
| ADAP2    | ArfGAP with dual PH domains 2                              | CENTA2, HSA272195, cent-b                                                        |  |
| ADAR     | Adenosine deaminase, RNA-specific                          | RP11-01E14.31, ACSU, DRADA, DSH, DSKAD, GTP1, HEL 4, HEL 4, K89DSDRD, D136, ADAR |  |
| ADARB1   | Adenosine deaminase, RNA-specific, B1                      | ADAR2, DRABA2, DRADA2, RED1                                                      |  |
| ADAT2    | Adenosine deaminase, tRNA-specific 2                       | hCG_18099, DEADC1, TAD2, dJ20N2, dJ20N2.1                                        |  |
| ADC      |                                                            |                                                                                  |  |
| ADCY1    | Adenylate cyclase 1 (brain)                                | AC1, DFNB44                                                                      |  |
| ADCY2    | Adenylate cyclase 2 (brain)                                |                                                                                  |  |
| ADCY6    | Adenylate cyclase 6                                        | AC6                                                                              |  |
| ADCY7    | Adenylate cyclase 7                                        | AC7                                                                              |  |
| ADCY9    | Adenylate cyclase 9                                        | AC9                                                                              |  |
| ADCYAP1  | Adenylate cyclase activating polypeptide 1 (pituitary)     |                                                                                  |  |
| ADD1     | Adducin 1 (alpha)                                          | RP11-520M5.1, ADDA                                                               |  |
| ADD2     | Adducin 2 (beta)                                           | ADDB                                                                             |  |
| ADD3     | Adducin 3 (gamma)                                          | RP11-252O7.3, ADDL                                                               |  |
| ADH1A    | Alcohol dehydrogenase 1A (class I), alpha                  | ADH1                                                                             |  |
| ADH1B    | Alcohol dehydrogenase 1B (class I), beta                   | ADH2, HEL-S-117                                                                  |  |
| ADH4     | Alcohol dehydrogenase 4 (class II), pi                     | ADH-2, HEL-S-4                                                                   |  |
| ADH5     | Alcohol dehydrogenase 5 (class III), chi                   | ADH-3, ADHX, FALDH, FDH, GSH-FDH, GSNOR                                          |  |
| ADHFE1   | Alcohol dehydrogenase, iron containing, 1                  | HMFT2263, ADH8, HOT                                                              |  |

|         |                                                                      |                                                   |  |
|---------|----------------------------------------------------------------------|---------------------------------------------------|--|
| ADIPOQ  | Adiponectin, C1Q and collagen domain containing                      | ACDC, ACP130, ADIPQ1E1, ADPN, AFM-1, AFM1, CDD30  |  |
| ADIPOR2 | Adiponectin receptor 2                                               | ACDCR2, PAQR2                                     |  |
| ADK     | Adenosine kinase                                                     | AK                                                |  |
| ADM     | Adrenomedullin                                                       | AM, PAMP                                          |  |
| ADNP    | Activity-dependent neuroprotector                                    | ADNP1, MRD28                                      |  |
| ADO     | 2-aminobenzamide (cysteamine) dihydrogenase                          | C10orf22                                          |  |
| ADORA2A | Adenosine A2a receptor                                               | A2aR, ADORA2, RDC8                                |  |
| ADPGK   | ADP-dependent glucokinase                                            | PSEC0260, 2610017G09Rik, ADP-GK                   |  |
| ADPRH   | ADP-ribosylarginine hydrolase                                        | ARH1                                              |  |
| ADRA2A  | Adrenoceptor alpha 2A                                                | ADRA2, ADRA2R, ADRAR, ALPHA2AAR, ZNF32            |  |
| ADRA2B  | Adrenoceptor alpha 2B                                                | ADRA2L1, ADRA2L2, ADRA2L3, ALTIHAZBAK, Adra2BAP   |  |
| ADRBK1  | Adrenergic, beta, receptor kinase 1                                  | BARK1, BETA-ARK1, GRK2                            |  |
| ADRBK2  | Adrenergic, beta, receptor kinase 2                                  | BARK2, GRK3                                       |  |
| AES     | Amino-terminal enhancer of split                                     | AES-1-2, ESP1, GRG, GRG5, TLE5, AES               |  |
| AFAP1   | Actin filament associated protein 1                                  | AFAP, AFAP-11010, AFAP1                           |  |
| AFARP1  | Aldo-keto reductase family 7, member A2 pseudogene 1                 |                                                   |  |
| AFF1    | AF4/FMR2 family, member 1                                            | AF4, MLLT2, PBM1                                  |  |
| AFF2    | AF4/FMR2 family, member 2                                            | FMR2, FMR2P, FRAXE, MRX2, OX19                    |  |
| AFF3    | AF4/FMR2 family, member 3                                            | LAF4, MLLT2-like                                  |  |
| AFF4    | AF4/FMR2 family, member 4                                            | HSPC092, AF5Q31, MCEF                             |  |
| AFG3L1  | AFG3-like AAA ATPase 1, pseudogene                                   | AFG3, AFG3L1                                      |  |
| AFTPH   | Aftiphilin                                                           | Nbla10388                                         |  |
| AGAP11  | Ankyrin repeat and GTPase domain Ankyrin repeat and GTPase domain 11 |                                                   |  |
| AGAP9   | Ankyrin repeat and GTPase domain 9                                   | AGAP-9, CTGLF6, bA301J7.2                         |  |
| AGBL3   | ATP/GTP binding protein-like 3                                       | CCP3                                              |  |
| AGBL4   | ATP/GTP binding protein-like 4                                       | RP11-342A17.1, CCP6                               |  |
| AGBL5   | ATP/GTP binding protein-like 5                                       | CCP5                                              |  |
| AGFG1   | ArfGAP with FG repeats 1                                             | HRB, RAB, RIP                                     |  |
| AGFG2   | ArfGAP with FG repeats 2                                             | tcag7.884, HRBL, RABR                             |  |
| AGGF1   | Angiogenic factor with G patch and FHA domains 1                     | GPATC7, GPATCH7, HSU84971, HUS84971, VG5Q         |  |
| AGK     | Acylglycerol kinase                                                  | CATC5, CTRCT38, MTDPS10, MULK                     |  |
| AGL     | Amylo-alpha-1, 6-glucosidase, 4-alpha-1-galactosidase                | GDE                                               |  |
| AGPAT1  | 1-Acylglycerol-3-phosphate O-acyltransferase 1                       | DAAT-216M16.8, 1-AGPAT1, G13, L1AA1-alpha, L1AA1A |  |

|         |                                              |                                                 |
|---------|----------------------------------------------|-------------------------------------------------|
| AGPAT3  | 1-Acylglycerol-3-phosphate O-                | UNQ759/PRO1490, LPAAT-GAMMA1, LPAAT3            |
| AGPAT4  | 1-Acylglycerol-3-phosphate O-                | RP3-473J16.2, 1-AGPAT4, LPAAT-delta, dJ473J16.2 |
| AGPAT5  | 1-Acylglycerol-3-phosphate O-                | 1AGPAT5, LPAATE                                 |
| AGPAT6  | 1-Acylglycerol-5-phosphate O-                | UNQ551/TKO1108, 1-AGPAT6, LPAAT-zeta,           |
| AGPAT9  | 1-Acylglycerol-5-phosphate O-                | LRM1475-7, AGPAT10, AGPAT8, GPAT3, LPAAT-       |
| AGPS    | Alkylglycerone phosphate synthase            | AAG5, ADAP-S, ADAS, ADHAPS, ADPS, ALDHPSY       |
| AGT     | Angiotensinogen (serpin peptidase inhibitor, | ANHU, SERPINA8                                  |
| AGTPBP1 | ATP/GTP binding protein 1                    | RP11-30C23.1, CCP1, NNA1                        |
| AGTR1   | Angiotensin II receptor, type 1              | AG25B, A11, A11AK, A11B, A11BK, A11K, A12N1,    |
| AGTRAP  | Angiotensin II receptor-associated protein   | RP11-56N19.3, ATRAP                             |
| AGXT    | Alanine-glyoxylate aminotransferase          | AGT, AGT11, PH1, SPAT, SPT, TLH6, AGXT          |
| AHCTF1  | AT hook containing transcription factor 1    | MSTP108, ELYS, MST108, TMBS62                   |
| AHCYL1  | Adenosylhomocysteinase-like 1                | DCAL, IRBIT, PPP1R78, PRO0233, XPVKONA          |
| AHNAK   | AHNAK nucleoprotein                          | AHNAKRS                                         |
| AHR     | Aryl hydrocarbon receptor                    | bHLHe76                                         |
| AHRR    | Aryl-hydrocarbon receptor repressor          | hCG_2044128, AHH, AHHR, bHLHe77                 |
| AICDA   | Activation-induced cytidine deaminase        | AID, ARP2, CDA2, HEL-S-284, HIGM2               |
| AIDA    | Axin interactor, dorsalization associated    | RP11-378J18.7, C1orf80                          |
| AIFM2   | Apoptosis-inducing factor, mitochondrial-    | RP11-367H5.2, AMID, PRG3                        |
| AIM1    | Absent in melanoma 1                         | RP11-294H11.2, CRYBG1, ST4                      |
| AIM1L   | Absent in melanoma 1-like                    | RP11-569G9.5, CRYBG2                            |
| AIPL1   | Aryl hydrocarbon receptor interacting        | AIPL2, LCA4                                     |
| AK3     | Adenylate kinase 3                           | RP11-6J24.4L1, AK6, AKL3L, AKL3L1, FIX, AK3     |
| AK3L1   | Adenylate kinase 4                           | RP4-686B20.1, AK 4, AK3, AK3L1, AK3L2           |
| AKAP11  | A kinase (PRKA) anchor protein 11            | AKAP-11, AKAP220, PPP1R44, PRKA11               |
| AKAP12  | A kinase (PRKA) anchor protein 12            | AKAP250, SSeCKS                                 |
| AKAP13  | A kinase (PRKA) anchor protein 13            | AKAP-13, AKAP-LDC, ANIOLET3, DNA, HA-3, H31,    |
| AKAP2   | A kinase (PRKA) anchor protein 2             | RP11-470J20.3, AKAP-2, AKAPKL, PRKA2            |
| AKAP4   | A kinase (PRKA) anchor protein 4             | RP11-577G1__D.1, AKAP 82, AKAP-4, AKAP 82,      |
| AKAP5   | A kinase (PRKA) anchor protein 5             | AKAP75, AKAP79, H21                             |
| AKAP6   | A kinase (PRKA) anchor protein 6             | ADAP100, ADAP6, AKAP100, PRKA6, mAKAP           |
| AKAP7   | A kinase (PRKA) anchor protein 7             | AKAP15, AKAP18                                  |
| AKAP9   | A kinase (PRKA) anchor protein 9             | AKAP-9, AKAP350, AKAP450, CG-NAP, H11FENION,    |

|         |                                                      |                                                                                    |   |
|---------|------------------------------------------------------|------------------------------------------------------------------------------------|---|
| AKD1    | Adenylate kinase domain containing 1                 | AKD2, C6orf199, C6orf224, dJ70A9.1                                                 |   |
| AKIRIN1 | Akirin 1                                             | RP11-781D11.2, C1orf108, STRF2                                                     |   |
| AKIRIN2 | Akirin 2                                             | C6orf166, FBI1, dJ486L4.2                                                          |   |
| AKNA    | AT-hook transcription factor                         | RP11-82I1.4                                                                        |   |
| AKR1B15 | Aldo-keto reductase family 1, member B15             | tcag7.1260, AKR1B10L, AK1R1B7                                                      |   |
| AKR1C2  | Aldo-keto reductase family 1, member C2              | AKR1C-pseudo, BADI, DD, DD2, DDH2, HAKKD, HBAR, MCDP2, SRVX, TDD                   |   |
| AKR1D1  | Aldo-keto reductase family 1, member D1              | 3o5bred, CBAS2, SRD5B1                                                             |   |
| AKR1E2  | Aldo-keto reductase family 1, member E2              | AKR1CL2, AKRDC1, LoopADR, hTSP, htAKR                                              |   |
| AKR7L   | Aldo-keto reductase family 7-like                    | AFAR3, AFB1-AR3, AKR7A4                                                            |   |
| AKT2    | v-akt murine thymoma viral oncogene homolog 2        | HHGHH, PKBB, PKBBETA, PRKBB, RAC-BETA                                              | v |
| AKT3    | v-akt murine thymoma viral oncogene homolog 3        | MI11, MI11L2, FRD-GAMMA, FRBG, FRKDU, RAC-BK, gamma, RAC-gamma, STK 2              |   |
| ALB     | Albumin                                              | GIG20, PRO0883, PRO0903, PRO1341                                                   |   |
| ALCAM   | Activated leukocyte cell adhesion molecule           | CD166, MEMD                                                                        |   |
| ALDH1A1 | Aldheyde dehydrogenase 1 family, member 1            | RP11-151D14.2, ALDC, ALDH1E1, ALDH1, ALDH1L1, HFL 9, HFL 5-52, HFL12, RUMBL, RALDH |   |
| ALDH1A2 | Aldheyde dehydrogenase 1 family, member 2            | RALDH(II), RALDH2, RALDH2-T                                                        |   |
| ALDH1A3 | Aldheyde dehydrogenase 1 family, member 3            | RP11-66B24.1, ALDH1A6, ALDH6, MCOP8, RALDH3                                        |   |
| ALDH1L1 | Aldheyde dehydrogenase 1 family, member 1L1          | 10-FTHFDH, 10-fTHF, FDH, FTHFD                                                     |   |
| ALDH1L2 | Aldheyde dehydrogenase 1 family, member 1L2          | mtFDH                                                                              |   |
| ALDH3A2 | Aldheyde dehydrogenase 3 family, member 2            | ALDH10, FALDH, SLS                                                                 |   |
| ALDH5A1 | Aldheyde dehydrogenase 5 family, member 1            | SSADH, SSDH                                                                        |   |
| ALDH9A1 | Aldheyde dehydrogenase 9 family, member 1            | ALDH4, ALDH7, ALDH9, E3, TMABADH                                                   |   |
| ALG1    | ALG1, chitobiosyltransferase subunit                 | FSEC0001, CDG1K, HMA11, HMT1-1, HMT1, MT1-1, Mt1, Mt1                              |   |
| ALG10   | ALG10, alpha-1,2-glucosyltransferase                 | ALG10A, DIE2, KCR1                                                                 |   |
| ALG10B  | ALG10B, alpha-1,2-glucosyltransferase                | ALG10, KCR1                                                                        |   |
| ALG11   | ALG11, alpha-1,2-mannosyltransferase                 | RP11-248G5.6, CDG1P, GT8                                                           |   |
| ALG13   | ALG13, UDP-N-acetylglucosaminyltransferase subunit   | RP11-278J18.2, CDG1S, CA0143, GLT26D1, MDS031, TDRD12, XGL047W                     |   |
| ALG2    | ALG2, alpha-1,3/1,6-mannosyltransferase              | RP11-13B9.1, CDG1i, NET38, hALPG2                                                  |   |
| ALG6    | ALG6, alpha-1,3-glucosyltransferase                  | My046, CDG1C                                                                       |   |
| ALG9    | ALG9, alpha-1,2-mannosyltransferase                  | CDG1L, DIBD1, LOH11CR1J                                                            |   |
| ALKBH4  | AlkB, alkylation repair homolog 4 ( <i>E. coli</i> ) | ABH4                                                                               |   |
| ALKBH5  | AlkB family member 5, RNA demethylase                | ABH5, OFOXD, OFOXD1                                                                |   |
| ALKBH8  | AlkB, alkylation repair homolog 8 ( <i>E. coli</i> ) | ABH8                                                                               |   |
| ALMS1P  | Alstrom syndrome 1 pseudogene                        |                                                                                    |   |



|          |                                                                                 |                                                         |  |
|----------|---------------------------------------------------------------------------------|---------------------------------------------------------|--|
| ALOX5    | Arachidonate 5-lipoxygenase                                                     | RP11-67C2.3, 5-LO, 5-LOX, 5LPG, LOG5                    |  |
| ALPK1    | Alpha-kinase 1                                                                  | 8430410J10Rik, LAK                                      |  |
| ALPK3    | Alpha-kinase 3                                                                  | MAK, MIDORI                                             |  |
| ALS2     | Amyotrophic lateral sclerosis 2 (juvenile)                                      | ALS2CR6, ALSJ, IAHSJ, PLSJ                              |  |
| ALS2CR12 | Amyotrophic lateral sclerosis 2 (juvenile)                                      |                                                         |  |
| ALS2CR4  |                                                                                 |                                                         |  |
| ALS2CR8  |                                                                                 |                                                         |  |
| AMAC1    |                                                                                 |                                                         |  |
| AMBRA1   | Autophagy/beclin-1 regulator 1                                                  | DCAF3, WDR94                                            |  |
| AMD1     | Adenosylmethionine decarboxylase 1                                              | RP11-397G5.3, ADOMETDC, AMD, SAMDC                      |  |
| AMFR     | Autocrine motility factor receptor, E3                                          | GP78, RNF45                                             |  |
| AMMECR1  | Aipert's syndrome, mental retardation,<br>midface hypoplasia and elliptocytosis | RP13-360B22.1, AMMERC1                                  |  |
| AMMECR1L | AMMECR1-like                                                                    |                                                         |  |
| AMOT     | Angiomotin                                                                      |                                                         |  |
| AMOTL1   | Angiomotin like 1                                                               | JEAP                                                    |  |
| AMOTL2   | Angiomotin like 2                                                               | LCCP                                                    |  |
| AMPD3    | Adenosine monophosphate deaminase 3                                             |                                                         |  |
| AMT      | Aminomethyltransferase                                                          | GCE, GCST, GCVT, NKH                                    |  |
| AMZ1     | Archaelysin family metallopeptidase 1                                           |                                                         |  |
| ANAPC16  | Anaphase promoting complex subunit 16                                           | APC16, C10orf104, CENP-27, MSAG, bA570G20.3             |  |
| ANGEL2   | Angel homolog 2 (Drosophila)                                                    | Ccr4d, KIAA0759L                                        |  |
| ANGPT1   | Angiopoietin 1                                                                  | AGP1, AGPT, ANG1                                        |  |
| ANGPT2   | Angiopoietin 2                                                                  | AGPT2, ANG2                                             |  |
| ANGPTL1  | Angiopoietin-like 1                                                             | FSEC0134, ANG3, ANGPT3, ANK1, Ang1, UNQ102,<br>H505C2.2 |  |
| ANGPTL2  | Angiopoietin-like 2                                                             | RP11-1M19.1, ARP2, HARP                                 |  |
| ANK1     | Ankyrin 1, erythrocytic                                                         | ANK, SPH1, SPH2                                         |  |
| ANK2     | Ankyrin 2, neuronal                                                             |                                                         |  |
| ANKAR    | Ankyrin and armadillo repeat containing                                         |                                                         |  |
| ANKFY1   | Ankyrin repeat and FYVE domain                                                  | ANKHZN, BTBD23, ZFYVE14                                 |  |
| ANKH     | Ankyrin inorganic pyrophosphate transport                                       | UNQ241/TKO274, ANK, CCAL2, CMD3, CTFDD,<br>HANK, MANK   |  |
| ANKIB1   | Ankyrin repeat and IBR domain containing 1                                      |                                                         |  |
| ANKLE1   | Ankyrin repeat and LEM domain containing                                        | ANKRD41, LEM3, LEMD6                                    |  |
| ANKLE2   | Ankyrin repeat and LEM domain containing                                        | KIAA0692, LEMD7, Lem4                                   |  |

|           |                                                                |                                             |  |
|-----------|----------------------------------------------------------------|---------------------------------------------|--|
| ANKMY1    | Ankyrin repeat and MITND domain                                | ZMYND13                                     |  |
| ANKMY2    | Ankyrin repeat and MITND domain<br>containing 2                | ZMYND20                                     |  |
| ANKRD1    | Ankyrin repeat domain 1 (cardiac muscle)                       | ALRP, C-193, CARP, CVARP, MVARP, bA320F15.2 |  |
| ANKRD10   | Ankyrin repeat domain 10                                       | RP11-120J20.3                               |  |
| ANKRD12   | Ankyrin repeat domain 12                                       | ANCO-2, ANCO1, GAC-1, Nbla00144             |  |
| ANKRD13A  | Ankyrin repeat domain 13A                                      | ANKRD13, NY-REN-25                          |  |
| ANKRD13C  | Ankyrin repeat domain 13C                                      | RP4-677H15.5, dJ677H15.3                    |  |
| ANKRD17   | Ankyrin repeat domain 17                                       | GTAR, NY-BR-16                              |  |
| ANKRD18A  | Ankyrin repeat domain 18A                                      |                                             |  |
| ANKRD20A2 | Ankyrin repeat domain 20 family, member<br>A2                  |                                             |  |
| ANKRD20A3 | Ankyrin repeat domain 20 family, member<br>A3                  |                                             |  |
| ANKRD20A5 | Ankyrin repeat domain 20 family, member<br>A5, pseudogene      |                                             |  |
| ANKRD20B  | Ankyrin repeat domain 20B                                      |                                             |  |
| ANKRD22   | Ankyrin repeat domain 22                                       |                                             |  |
| ANKRD26   | Ankyrin repeat domain 26                                       | THC2, bA145E8.1                             |  |
| ANKRD27   | Ankyrin repeat domain 27 (VPS9 domain)                         | PP12899, VARP                               |  |
| ANKRD28   | Ankyrin repeat domain 28                                       | PITK, PPP1R65                               |  |
| ANKRD30B  | Ankyrin repeat domain 30B                                      | NY-BR-1.1                                   |  |
| ANKRD32   | Ankyrin repeat domain 32                                       | BRCTD1, BRCTx                               |  |
| ANKRD33   | Ankyrin repeat domain 33                                       | C12orf7, PANKY                              |  |
| ANKRD34C  | Ankyrin repeat domain 34C                                      |                                             |  |
| ANKRD36   | Ankyrin repeat domain 36                                       | UNQ2430/PRO499, UNQ2430                     |  |
| ANKRD40   | Ankyrin repeat domain 40                                       |                                             |  |
| ANKRD42   | Ankyrin repeat domain 42                                       | PPP1R79, SARP                               |  |
| ANKRD43   |                                                                |                                             |  |
| ANKRD44   | Ankyrin repeat domain 44                                       | PP6-ARS-B                                   |  |
| ANKRD5    |                                                                |                                             |  |
| ANKRD50   | Ankyrin repeat domain 50                                       |                                             |  |
| ANKRD52   | Ankyrin repeat domain 52                                       | UNQ5837, ANKRD33                            |  |
| ANKRD53   | Ankyrin repeat domain 53                                       |                                             |  |
| ANKRD62   | Ankyrin repeat domain 62                                       | DKFZp779B1634                               |  |
| ANKRD7    | Ankyrin repeat domain 7                                        | TSA806                                      |  |
| ANKS1B    | Ankyrin repeat and sterile alpha motif<br>domain containing 1B | AIDA, AIDA-1, ANKS2, EB-1, EB1, cajalin-2   |  |

|         |                                                                                   |                                                                                                              |   |
|---------|-----------------------------------------------------------------------------------|--------------------------------------------------------------------------------------------------------------|---|
| ANKZF1  | Ankyrin repeat and zinc finger domain                                             | ZNF744                                                                                                       |   |
| ANO1    | Anoctamin 1, calcium activated chloride channel                                   | DOG1, ORAOV2, TAOS2, TMEM16A                                                                                 |   |
| ANO4    | Anoctamin 4                                                                       | TMEM16D                                                                                                      |   |
| ANO5    | Anoctamin 5                                                                       | GDD1, LGMD2L, TMEM16E                                                                                        |   |
| ANO6    | Anoctamin 6                                                                       | BDPLT7, SCTS, TMEM16F                                                                                        |   |
| ANO7    | Anoctamin 7                                                                       | D-TMPT, DTMPT, IFCA-3, IFCA5, INGL1, FCANAF3, FCANAF5, FCANAF6, TMEM16G, LAMP1, MATM, PTHAT1, PTHAT2, PTHAT3 |   |
| ANP32A  | Acidic (leucine-rich) nuclear phosphoprotein 32 family member A                   | CTJN11, H1T, TM16A, LAMP1, MATM, PTHAT1, PTHAT2, PTHAT3                                                      |   |
| ANTXR1  | Anthrax toxin receptor 1                                                          | ATR, GAPO, TEM8                                                                                              |   |
| ANTXR2  | Anthrax toxin receptor 2                                                          | CMG-2, CMG2, HFS, ISH, JHF                                                                                   |   |
| ANUBL1  |                                                                                   |                                                                                                              |   |
| ANXA10  | Annexin A10                                                                       | ANX14                                                                                                        |   |
| ANXA11  | Annexin A11                                                                       | RP11-369J21.10-010, ANX11, CAP50                                                                             |   |
| ANXA4   | Annexin A4                                                                        | ANX4, HEL-S-274, PIG28, ZAP36                                                                                |   |
| ANXA6   | Annexin A6                                                                        | ANX6, CBP68                                                                                                  |   |
| ANXA7   | Annexin A7                                                                        | RP11-537A6.8, ANX7, SNX, SYNEXIN                                                                             |   |
| AP1AR   | Adaptor-related protein complex 1                                                 | PRO0971, 2C18, C4orf16, GBAR, gamma-BAR                                                                      |   |
| AP1B1   | Adaptor-related protein complex 1, beta 1                                         | ADTB1, AP105A, BAM22, CLAPB2                                                                                 |   |
| AP1G1   | Adaptor-related protein complex 1, gamma 1                                        | ADTG, CLAPG1                                                                                                 |   |
| AP1S2   | Adaptor-related protein complex 1, sigma 2                                        | DCZZ, MGC1902, MIKAS9, MIKAS21, MIKAS3, MYX5, PDC, SIGMA1B                                                   |   |
| AP1S3   | Adaptor-related protein complex 1, sigma 3                                        |                                                                                                              |   |
| AP3D1   | Adaptor-related protein complex 3, delta 1                                        | PRO0039, ADTD, hBLVR                                                                                         |   |
| AP3M1   | Adaptor-related protein complex 3, mu 1                                           | RP11-178G16.4                                                                                                |   |
| AP3M2   | Adaptor-related protein complex 3, mu 2                                           | AP47B, CLA20, P47B                                                                                           |   |
| AP3S2   | Adaptor-related protein complex 3, sigma 2                                        | AP3S3, sigma3b                                                                                               |   |
| AP4B1   | Adaptor-related protein complex 4, beta 1                                         | RP5-1073O3.4, BETA-4, CPSQ5, SPG47                                                                           |   |
| AP4E1   | Adaptor-related protein complex 4, epsilon 1                                      | CPSQ4, SPG51                                                                                                 |   |
| AP4S1   | Adaptor-related protein complex 4, sigma 1                                        | AP47B, CLA20, CLAPS4, CPSQ6, SPG52                                                                           |   |
| APBA1   | Amyloid beta (A4) precursor protein-binding family B member 1                     | D9S411E, LIN10, MINT1, X11, X11A, X11ALPHA                                                                   |   |
| APBB1IP | Amyloid beta (A4) precursor protein-binding family B member 1 interacting protein | RP11-128B16.1, INAG1, PREL1, RARP1, RIAM                                                                     |   |
| APBB2   | Amyloid beta (A4) precursor protein-binding family B member 2                     | FE65L, FE65L1                                                                                                |   |
| APC     | Adenomatous polyposis coli                                                        | BTSP2, DP2, DP2.5, DP3, GS, PPP1R46                                                                          | v |
| APCDD1L | Adenomatous polyposis coli down-regulated 1 like                                  | RP4-685L9.2                                                                                                  |   |
| APEH    | Acylaminoacyl-peptide hydrolase                                                   | AAKE, ACT11, APT1, D3F153Z, D3546E, DNF153Z, ODU                                                             |   |

|          |                                                                                                                         |                                               |  |
|----------|-------------------------------------------------------------------------------------------------------------------------|-----------------------------------------------|--|
| APH1B    | APH1B gamma secretase subunit                                                                                           | UNQ088/PRO1328, APH1B, PRO1328, FSTL, TAAAC88 |  |
| API5     | Apoptosis inhibitor 5                                                                                                   | MIG8, AAC-11, AAC11                           |  |
| APITD1   | Apoptosis-inducing, TAF9-like domain 1                                                                                  | CENP-S, CENPS, FAAP16, MHF1                   |  |
| APLF     | Aprataxin and PNKP like factor                                                                                          | APFL, C2orf13, PALF, Xip1, ZCCHH1             |  |
| APLN     | Apelin                                                                                                                  | UNQ471, APEL, XNPEP2                          |  |
| APLP2    | Amyloid beta (A4) precursor-like protein 2                                                                              | APLP-2, APPH, APPL2, CDEBP                    |  |
| APOBEC1  | Apolipoprotein B mRNA editing enzyme, catalytic subunit-like 1                                                          | APOBEC-1, BEDP, CDAR1, HEPR                   |  |
| APOBEC2  | Apolipoprotein B mRNA editing enzyme, catalytic subunit-like 2                                                          | ARCD1, ARP1                                   |  |
| APOF     | Apolipoprotein F                                                                                                        | Apo-F, LTIP                                   |  |
| APOL6    | Apolipoprotein L, 6                                                                                                     | UNQ3095/PRO21341, APOL-VI, APOLVI             |  |
| APOLD1   | Apolipoprotein L domain containing 1                                                                                    | VERGE                                         |  |
| APOO     | Apolipoprotein O                                                                                                        | My025, FAM121B                                |  |
| APPBP2   | Amyloid beta precursor protein (cytoplasmic) adaptor protein, phosphotyrosine interaction, PH domain and leucine zipper | APP-BP2, HS.84084, PAT1                       |  |
| APPL2    | Adaptor protein, phosphotyrosine interaction, PH domain and leucine zipper                                              | DIP13B                                        |  |
| AQP1     | Aquaporin 1 (Colton blood group)                                                                                        | AQP-CHIP, CHIP28, CO                          |  |
| AQP10    | Aquaporin 10                                                                                                            | AQPA_HUMAN                                    |  |
| AQP2     | Aquaporin 2 (collecting duct)                                                                                           | AQP-CD, WCH-CD                                |  |
| AQP3     | Aquaporin 3 (Gill blood group)                                                                                          | AQP-3, GIL                                    |  |
| AQP4     | Aquaporin 4                                                                                                             | HMIWC2, MIWC                                  |  |
| AQP8     | Aquaporin 8                                                                                                             | AQP-8                                         |  |
| AQP9     | Aquaporin 9                                                                                                             | AQP-9, HsT17287, SSC1                         |  |
| ARAP2    | ARHGAP with RHO GAP domain, ankyrin repeat and PH domain 2                                                              | CENTD1, PARX                                  |  |
| ARAP3    | ARHGAP with RHO GAP domain, ankyrin repeat and PH domain 3                                                              | CENTD3, DRAG1                                 |  |
| ARF3     | ADP-ribosylation factor 3                                                                                               |                                               |  |
| ARF6     | ADP-ribosylation factor6                                                                                                |                                               |  |
| ARFGAP3  | ADP-ribosylation factor GTPase activating protein 3                                                                     | AL049757.1, ARFGAP1                           |  |
| ARFGEF1  | ADP-ribosylation factor guanine nucleotide exchange factor 1                                                            | ARFGEF1, BIG1, P200                           |  |
| ARFGEF2  | ADP-ribosylation factor guanine nucleotide exchange factor 2 (beta-falixin A inhibitor)                                 | BIG2, PVNH2, dJ1164I10.1                      |  |
| ARFIP1   | ADP-ribosylation factor interacting protein 1                                                                           | ADP-ribosylation factor interacting protein 1 |  |
| ARFRP1   | ADP-ribosylation factor related protein 1                                                                               | RP4-583P15.1, ARL18, ARP, Arp1                |  |
| ARG2     | Arginase 2                                                                                                              |                                               |  |
| ARGFX    | Arginine-fifty homeobox                                                                                                 |                                               |  |
| ARHGAP10 | Rho GTPase activating protein 10                                                                                        | GRAF2, PS-GAP, PSGAP                          |  |

|           |                                                 |                                                                                                                                      |   |
|-----------|-------------------------------------------------|--------------------------------------------------------------------------------------------------------------------------------------|---|
| ARHGAP11A | Rho GTPase activating protein 11A               | RP11-1000B6.5, GAP (1-12)                                                                                                            |   |
| ARHGAP11B | Rho GTPase activating protein 11B               | B'-T, FAM7B1                                                                                                                         |   |
| ARHGAP12  | Rho GTPase activating protein 12                |                                                                                                                                      |   |
| ARHGAP17  | Rho GTPase activating protein 17                | hCG_1984370, MST1000, MST110, MST1058, MSTR066, MSTR110, NADBNL, PR267, PR4524, RICH                                                 |   |
| ARHGAP18  | Rho GTPase activating protein 18                | MacGAP, SENEX, bA307O14.2                                                                                                            |   |
| ARHGAP19  | Rho GTPase activating protein 19                |                                                                                                                                      |   |
| ARHGAP20  | Rho GTPase activating protein 20                | RARHOGAP                                                                                                                             |   |
| ARHGAP25  | Rho GTPase activating protein 25                | HEL-S-308, KAIA0053                                                                                                                  |   |
| ARHGAP26  | Rho GTPase activating protein 26                | GRAF, GRAF1, OPHN1L, OPHN1L1                                                                                                         |   |
| ARHGAP29  | Rho GTPase activating protein 29                | RP11-255E17.1, PARG1                                                                                                                 |   |
| ARHGAP32  | Rho GTPase activating protein 32                | CC-GAP, GR11, FX-RICS, RICS, p200RhoGAP, p250GAP                                                                                     |   |
| ARHGAP5   | Rho GTPase activating protein 5                 | GFI2, RhoGAP5, p190-B, p190BRhoGAP                                                                                                   |   |
| ARHGAP6   | Rho GTPase activating protein 6                 | RHOGAP6, RHOGAPX-1                                                                                                                   |   |
| ARHGEF12  | Rho guanine nucleotide exchange factor (GEF) 12 | LARG, PRO2792                                                                                                                        | v |
| ARHGEF15  | Rho guanine nucleotide exchange factor (GEF) 15 | ARGEF15, E5, Ephexin5, Vsm-RhoGEF                                                                                                    |   |
| ARHGEF17  | Rho guanine nucleotide exchange factor (GEF) 17 | P164RHOGEF, TEM4, p164-RhoGEF                                                                                                        |   |
| ARHGEF2   | Rho guanine nucleotide exchange factor (GEF) 2  | RP11-336K24.3, GEF, GEF-H1, GEFH1, LFP40, P40                                                                                        |   |
| ARHGEF3   | Rho guanine nucleotide exchange factor (GEF) 3  | GEF3, STA3, XPLN                                                                                                                     |   |
| ARHGEF33  | Rho guanine nucleotide exchange factor (GEF) 33 |                                                                                                                                      |   |
| ARHGEF37  | Rho guanine nucleotide exchange factor (GEF) 37 |                                                                                                                                      |   |
| ARHGEF7   | Rho guanine nucleotide exchange factor (GEF) 7  | RP11-494F3.1, BETA-TX, COOL-1, COOL1, RP11-1937C3.4, P50, P50BP, P85, P85GGL1, P85SDD                                                |   |
| ARHGEF9   | Rho guanine nucleotide exchange factor (GEF) 9  | RP11-337C3.4, COOL1, DISTIN, LILL8, HPLM-2, PLM-2, PFM2, RP11-419LE10.1, OAS-3, BAF200B, BRIGHT, DANIS, FLD/OSA1, MBD12, OSA2, P250B |   |
| ARID1B    | AT rich interactive domain 1B (SWI1-like)       | RP11-494F3.1, BETA-TX, COOL-1, COOL1, RP11-1937C3.4, P50, P50BP, P85, P85GGL1, P85SDD                                                |   |
| ARID2     | AT rich interactive domain 2 (ARID, KIA-)       | BAF200, p200                                                                                                                         | v |
| ARID3A    | AT rich interactive domain 3A (BRIGHT-)         | BRIGHT, DRIL1, DRIL3, E2FBP1                                                                                                         |   |
| ARID3B    | AT rich interactive domain 3B (BRIGHT-)         | BDP, DRIL2                                                                                                                           |   |
| ARID4B    | AT rich interactive domain 4B (RBP1-like)       | RP11-382D8.2, DCAA, DKCAAT, KDDITL1, KBITL1, CAP180                                                                                  |   |
| ARID5B    | AT rich interactive domain 5B (MRF1-like)       | RP11-341A19.1, DESRT, MRF-2, MRF2                                                                                                    |   |
| ARIH1     | Ariadne RBR E3 ubiquitin protein ligase 1       | HUSSY-27, ARI, HARI, HHARI, UBCH7BP                                                                                                  |   |
| ARIH2     | Ariadne RBR E3 ubiquitin protein ligase 2       | HT005, ARI2, TRIAD1                                                                                                                  |   |
| ARL1      | ADP-ribosylation factor-like 1                  | ARFL1                                                                                                                                |   |
| ARL10     | ADP-ribosylation factor-like 10                 | Arl10a, Arm1                                                                                                                         |   |
| ARL11     | ADP-ribosylation factor-like 11                 | RP11-432M24.1, ARLTS1                                                                                                                |   |

|         |                                                      |                                                                      |   |
|---------|------------------------------------------------------|----------------------------------------------------------------------|---|
| ARL17A  | ADP-ribosylation factor-like 17A                     | RP11-927P21.1, ARF1P2, ARL17P1                                       |   |
| ARL2BP  | ADP-ribosylation factor-like 2 binding protein       | BART, BART1, RP66                                                    |   |
| ARL3    | ADP-ribosylation factor-like 3                       | RP11-47A8.3, ARFL3                                                   |   |
| ARL4A   | ADP-ribosylation factor-like 4A                      | ARL4                                                                 |   |
| ARL4C   | ADP-ribosylation factor-like 4C                      | ARL7, LAK                                                            |   |
| ARL4D   | ADP-ribosylation factor-like 4D                      | ARF4L, ARL6                                                          |   |
| ARL5A   | ADP-ribosylation factor-like 5A                      | ARFLP5, ARL5                                                         |   |
| ARL5B   | ADP-ribosylation factor-like 5B                      | ARL8                                                                 |   |
| ARL6    | ADP-ribosylation factor-like 6                       | BBS3, RP55                                                           |   |
| ARL6IP1 | ADP-ribosylation factor-like 6 interacting protein 1 | AIP1, ARL6IP, ARMER, SPG61                                           |   |
| ARL6IP5 | ADP-ribosylation factor-like 6 interacting protein 5 | HSPC127, DLK11, GTRAP3-18, JWA, TRAF3, TRAF3IP1                      |   |
| ARL6IP6 | ADP-ribosylation factor-like 6 interacting protein 6 | AIP-6, PFAAP1                                                        |   |
| ARL8B   | ADP-ribosylation factor-like 8B                      | ARL10C, Gie1                                                         |   |
| ARMC1   | Armadillo repeat containing 1                        | Arcp                                                                 |   |
| ARMC10  | Armadillo repeat containing 10                       | PSEC0198, PNAS-112, PNAS112, SVH                                     |   |
| ARMC4   | Armadillo repeat containing 4                        | RP11-691I13.1, CILD23                                                |   |
| ARMC8   | Armadillo repeat containing 8                        | S863-2, GID5, HSPC056, VID28                                         |   |
| ARMC9   | Armadillo repeat containing 9                        | ARM, KU-MEL-1, NS21                                                  |   |
| ARMCX2  | Armadillo repeat containing, X-linked 2              | GHc-602D8.1, ALEX2, GASP9                                            |   |
| ARMCX3  | Armadillo repeat containing, X-linked 3              | RP4-545K15.2, ALEX3, GASP6, dJ545K15.2                               |   |
| ARMCX4  | Armadillo repeat containing, X-linked 4              | LL0XNC01-209G1.1, CXorf35, GASP4                                     |   |
| ARNT    | Aryl hydrocarbon receptor nuclear translocator 1     | HR23F-beta, HR23F-beta, HR23F-beta, HR23F, HR23F-beta, TANGO, bHLHe3 | v |
| ARNT2   | Aryl hydrocarbon receptor nuclear translocator 2     | WEDAS, bHLHe1                                                        |   |
| ARNTL   | Aryl hydrocarbon receptor nuclear translocator 3     | BMAL1, BMAL1c, JAP3, MOP3, PASD3, TIC, bHLHe5                        |   |
| ARPC1A  | Actin related protein 2/3 complex, subunit 1A        | Arc40, HEL-68, SOP2Hs, SOP2L                                         |   |
| ARPC1B  | Actin related protein 2/3 complex, subunit 1B        | ARC41, p40-ARC, p41-ARC                                              |   |
| ARPP21  | CAMP-regulated phosphoprotein, 21 kDa                | ARPP-21, R3HDM3, RCS, TARPP                                          |   |
| ARRB1   | Arrestin, beta 1                                     | ARB1, ARR1                                                           |   |
| ARRB2   | Arrestin, beta 2                                     | ARB2, ARR2, BARR2                                                    |   |
| ARRDC3  | Arrestin domain containing 3                         | TLIMP                                                                |   |
| ARRDC4  | Arrestin domain containing 4                         |                                                                      |   |
| ARRDC5  | Arrestin domain containing 5                         | 1700013E09Rik                                                        |   |
| ARSB    | Arylsulfatase B                                      | ASB, G4S, MPS6                                                       |   |

|         |                                                                                                           |                                                   |   |
|---------|-----------------------------------------------------------------------------------------------------------|---------------------------------------------------|---|
| ARSD    | Arylsulfatase D                                                                                           | ASD                                               |   |
| ARSJ    | Arylsulfatase family, member J                                                                            | UNQ372/PRO708                                     |   |
| ARSK    | Arylsulfatase family, member K                                                                            | UNQ630/PRO1246, TSULF                             |   |
| ART5    | ADP-ribosyltransferase 5                                                                                  | UNQ575/PRO1137, ARTC5                             |   |
| ARV1    | ARV1 homolog ( <i>S. cerevisiae</i> )                                                                     | RP11-423F24.1                                     |   |
| ASAH2   | <i>iv</i> -acylsphingosine amidohydrolase (non-ARV1-like) with SH3 domain, ankyrin repeat and PH domain 2 | BCDase, HNAC1, LCDase, N-CDase, NCDase            |   |
| ASAP2   | ARV1-like with SH3 domain, ankyrin repeat and PH domain 2                                                 | AMAT2, CENTB5, DDEF2, TAG5, TAF, Tap-alpha, SHAC1 |   |
| ASAP3   | ARV1-like with SH3 domain, ankyrin repeat and PH domain 2                                                 | ACAP4, CENTB6, DDEFL1, UPLC1                      |   |
| ASB1    | Ankyrin repeat and SOCS box containing 1                                                                  | ASB-1                                             |   |
| ASB15   | Ankyrin repeat and SOCS box containing 15                                                                 |                                                   |   |
| ASB2    | Ankyrin repeat and SOCS box containing 2                                                                  | ASB-2                                             |   |
| ASB3    | Ankyrin repeat and SOCS box containing 3                                                                  | ASB-3                                             |   |
| ASB5    | Ankyrin repeat and SOCS box containing 5                                                                  | ASB-5                                             |   |
| ASB7    | Ankyrin repeat and SOCS box containing 7                                                                  |                                                   |   |
| ASB8    | Ankyrin repeat and SOCS box containing 8                                                                  | PP14212                                           |   |
| ASCC1   | Activating signal integrator 1 complex                                                                    | CGI-18, ASC1p50, p50                              |   |
| ASCC3   | Activating signal integrator 1 complex                                                                    | RP1-121G13.4, ASC1p200, HELIC1, RNAH              |   |
| ASF1B   | Anti-silencing function 1B histone deacetylase                                                            | CIA-II                                            |   |
| ASFMR1  | FMR1 antisense RNA 1                                                                                      | FMR4; ASFMR1; FMR1AS; FMR1-AS                     |   |
| ASL     | Argininosuccinate lyase                                                                                   | ASAL                                              |   |
| ASPH    | Aspartate beta-hydroxylase                                                                                | AAH, BAH, CASQ2BP1, FDLAB, HAAH, JCTN, junctin    |   |
| ASPHD1  | Aspartate beta-hydroxylase domain containing 1                                                            |                                                   |   |
| ASPN    | Asporin                                                                                                   | RP11-77D6.3, OS3, PLAP-1, PLAP1, SLRR1C           |   |
| ASRGL1  | Asparaginase like 1                                                                                       | ALP, ALP1, CRASH                                  |   |
| ASTN1   | Astrotactin 1                                                                                             | ASTN                                              |   |
| ASXL2   | Additional sex comb like transcriptional regulator 2                                                      | ASXH2                                             |   |
| ATAD2B  | ATPase family, AAA domain containing 2B                                                                   |                                                   |   |
| ATAD3C  | ATPase family, AAA domain containing 3C                                                                   | RP4-628J24.1                                      |   |
| ATF1    | ATPase family, AAA domain containing 3C                                                                   | Activating transcription factor 1                 | v |
| ATF2    | Activating transcription factor 2                                                                         | CRE-BP1, CREB-2, CREB2, HB16, TREB7               |   |
| ATF6    | Activating transcription factor 6                                                                         | ATF6A                                             |   |
| ATF7    | Activating transcription factor 7                                                                         | ATFA                                              |   |
| ATF7IP2 | Activating transcription factor 7 interacting protein 2                                                   | MCAF2                                             |   |

|          |                                                                       |                                                                                                                                |   |
|----------|-----------------------------------------------------------------------|--------------------------------------------------------------------------------------------------------------------------------|---|
| ATG10    | Autophagy related 10                                                  | PP12616, APG10, APG10L, pp12616                                                                                                |   |
| ATG16L1  | Autophagy related 16-like 1                                           | hCCU_16178+1, ATG10L, ATG10A, ATG10L, IDDT0, WDR20                                                                             |   |
| ATG2B    | Autophagy related 2B                                                  | C14orf103                                                                                                                      |   |
| ATG4B    | Autophagy related 4B, cysteine peptidase                              | APG4B, AUTL1                                                                                                                   |   |
| ATG5     | Autophagy related 5                                                   | APG5, APG5-LIKE, APG5L, ASP, hAPG5                                                                                             |   |
| ATG7     | Autophagy related 7                                                   | APG7-LIKE, APG7L, GSA7                                                                                                         |   |
| ATL1     | Atlastin GTPase 1                                                     | AD-FSP, FSP1, GBP3, HSN1D, SPG3, SPG3A, atlastin1                                                                              |   |
| ATL2     | Atlastin GTPase 2                                                     | ARL3IP2, ARL6IP2, atlastin2                                                                                                    |   |
| ATM      | ATM serine/threonine kinase                                           | AT1, ATA, ATC, ATD, ATDC, ATE, TEL1, TELO1                                                                                     | v |
| ATMIN    | ATM interactor                                                        | ASCIZ, ZNF822                                                                                                                  |   |
| ATP10B   | ATPase, class V, type 10B                                             | ATPVB                                                                                                                          |   |
| ATP10D   | ATPase, class V, type 10D                                             | ATPVD                                                                                                                          |   |
| ATP11A   | ATPase, class VI, type 11A                                            | RP11-120K24.1, ATP1H, ATPIS                                                                                                    |   |
| ATP11B   | ATPase, class VI, type 11B                                            | ATPIF, ATPIR                                                                                                                   |   |
| ATP11C   | ATPase, class VI, type 11C                                            | RP11-197K18.1, ATPIG, ATPIQ                                                                                                    |   |
| ATP13A2  | ATPase type 13A2                                                      | RP1-37C10.4, CLN12, HSA9947, KRPPD, PARK9                                                                                      |   |
| ATP13A3  | ATPase type 13A3                                                      | AFURS1                                                                                                                         |   |
| ATP1A2   | ATPase, Na <sup>+</sup> /K <sup>+</sup> transporting, alpha 2         | RP11-536C5.4, FHM2, MHP2                                                                                                       |   |
| ATP1A4   | ATPase, Na <sup>+</sup> /K <sup>+</sup> transporting, alpha 4         | RP11-536C5.5, ATP1A1, ATP1AL2                                                                                                  |   |
| ATP1B1   | ATPase, Na <sup>+</sup> /K <sup>+</sup> transporting, beta 1          | ATP1B                                                                                                                          |   |
| ATP1B2   | ATPase, Na <sup>+</sup> /K <sup>+</sup> transporting, beta 2          | AMOG                                                                                                                           |   |
| ATP2A2   | ATPase, Ca <sup>++</sup> transporting, cardiac muscle, slow-twitch    | ATP2B, DAR, DD, SERCA2                                                                                                         |   |
| ATP2B1   | ATPase, Ca <sup>++</sup> transporting, plasma membrane                | PMCA1, PMCA1kb                                                                                                                 |   |
| ATP2B2   | ATPase, Ca <sup>++</sup> transporting, plasma membrane                | PMCA2, PMCA2a, PMCA2i                                                                                                          |   |
| ATP2B3   | ATPase, Ca <sup>++</sup> transporting, plasma membrane                | CFAP39, CLA2, OPCA, PMCA3, PMCA3a, SCAX1                                                                                       | v |
| ATP2B4   | ATPase, Ca <sup>++</sup> transporting, plasma membrane                | ATP2B2, MXRA1, PMCA4, PMCA4b, PMCA4x                                                                                           |   |
| ATP4B    | ATPase, H <sup>+</sup> /K <sup>+</sup> exchanging, beta polypeptide   | RP11-230F18.4, ATP6B                                                                                                           |   |
| ATP5F1   | ATP synthase, H <sup>+</sup> transporting, mitochondrial F1Fo complex | RP11-552M11.5, PIG47                                                                                                           |   |
| ATP5G3   | ATP synthase, H <sup>+</sup> transporting, mitochondrial F1Fo complex | P3                                                                                                                             |   |
| ATP5SL   | ATP5S-like                                                            |                                                                                                                                |   |
| ATP6AP1  | ATPase, H <sup>+</sup> transporting, lysosomal V0 domain 1            | AAATW85505D9.4, 10A, ATP6H1, ATP6S1, AC45, C12, HAT28, YAR3, YAP2                                                              |   |
| ATP6AP2  | ATPase, H <sup>+</sup> transporting, lysosomal V0 domain 2            | AAATW85505D9.4, 10A, ATP6H2, ATP6M8-9, EEDT10, M8-A2, MRVE, MRVCLL, MSTP000, PPP, PBNP, VMDF                                   |   |
| ATP6V0A2 | ATPase, H <sup>+</sup> transporting, lysosomal V0 domain 2            | AAATW85505D9.4, 10A, ATP6H2, ATP6M8-9, EEDT10, M8-A2, MRVE, MRVCLL, MSTP000, PPP, PBNP, VMDF, STV1, TIC, TICM, TIC6, VPH1, WSS |   |



|          |                                                         |                                                                             |   |
|----------|---------------------------------------------------------|-----------------------------------------------------------------------------|---|
| ATP6V0D2 | ATPase, H <sup>+</sup> transporting, lysosomal 38 kDa,  | ATP6D2, VMA6                                                                |   |
| ATP6V0E1 | ATPase, H <sup>+</sup> transporting, lysosomal 9 kDa,   | ATP6H, ATP6V0E, M9.2, Vma21, Vma21p                                         |   |
| ATP6V1A  | ATPase, H <sup>+</sup> transporting, lysosomal 70 kDa,  | ATP6A11, HO68, VA68, VPP2, Vma1, ATP6V1A                                    |   |
| ATP6V1C2 | ATPase, H <sup>+</sup> transporting, lysosomal 42 kDa,  | ATP6C2, VMA5                                                                |   |
| ATP6V1E1 | ATPase, H <sup>+</sup> transporting, lysosomal 31 kDa,  | ATP6E, ATP6E2, ATP6V1E, P31, Vma4                                           |   |
| ATP6V1G2 | ATPase, H <sup>+</sup> transporting, lysosomal 13 kDa,  | DADB-26I14.6, ATP6G, ATP6G2, NG38, VMA10                                    |   |
| ATP6V1H  | ATPase, H <sup>+</sup> transporting, lysosomal 50/57    | CGI-11, MSTP042, NBP1, SPD, SPDbalpha, SPDbeta, VMA12                       |   |
| ATP7A    | ATPase, Cu <sup>++</sup> transporting, alpha            | RP3-465G10.1, DSMAX, MK, MNK, SMAX3                                         |   |
| ATP7B    | ATPase, Cu <sup>++</sup> transporting, beta polypeptide | RP11-327P2.1, PWD, WC1, WD, WND                                             |   |
| ATP8A1   | ATPase, aminophosphonate transporter                    | ATPASEII, ATPIA, ATPP2                                                      |   |
| ATP8A2   | ATPase, aminophosphonate transporter,                   | RP11-141F12.1, ATP, ATPIB, CAMRQ4, IB, ML-1                                 |   |
| ATP8B1   | ATPase, aminophosphonate transporter,                   | ATPIC, BRIC, FIC1, ICP1, PFIC, PFIC1                                        |   |
| ATP8B2   | ATPase, aminophosphonate transporter,                   | RP11-350G8.2, ATPID                                                         |   |
| ATP8B4   | ATPase, class I, type 8B, member 4                      | ATPIM                                                                       |   |
| ATP9B    | ATPase, class II, type 9B                               | HUSSY-20, ATPASEP, ATPIIB, NEO1L, hMMR1                                     |   |
| ATPAF1   | ATP synthase mitochondrial F1 complex                   | ATP11, ATP11p                                                               |   |
| ATPAF2   | ATP synthase mitochondrial F1 complex                   | LP3663, ATP12, ATP12p, MC5DN1                                               |   |
| ATPBD4   |                                                         |                                                                             |   |
| ATRN     | Attractin                                               | DPPT-L, MGCA                                                                |   |
| ATRNL1   | Attractin-like 1                                        | ALP, bA338L11.1, bA454H24.1                                                 |   |
| ATRX     | Alpha thalassemia/mental retardation                    | RP3-875J14.1, ATRZ, JMS, MKAH11, KAD54, RAD54L, SEM1, SLS, YH2, YND, ZNF119 | v |
| ATXN1    | Ataxin 1                                                | ATX1, D6S504E, SCA1                                                         |   |
| ATXN10   | Ataxin 10                                               | RP1-37M3.7, E46L, HUMEEP, SCA10                                             |   |
| ATXN1L   | Ataxin 1-like                                           | hCG_1646491, BOAT, BOAT1                                                    |   |
| ATXN2    | Ataxin 2                                                | ASL13, ATX2, SCA2, TNRC13                                                   |   |
| ATXN3    | Ataxin 3                                                | RP11-529H20.5, AT3, ATX3, JOS, MJD, MJD1, SCA3                              |   |
| ATXN7    | Ataxin 7                                                | ADCAII, OPCA3, SCA7                                                         |   |
| ATXN7L1  | Ataxin 7-like 1                                         | tcag7.1150, ATXN7L4                                                         |   |
| ATXN7L3B | Ataxin 7-like 3B                                        |                                                                             |   |
| ATXN8OS  | ATXN8 opposite strand (non-protein coding)              | KLHL1AS, NCRNA00003, SCA8                                                   |   |
| AUH      | AO RNA binding protein/enoyl-CoA                        |                                                                             |   |
| AUTS2    | Autism susceptibility candidate 2                       | FBRSL2, MRD26                                                               |   |
| AVL9     | AVL9 homolog ( <i>S. cerevisiae</i> )                   | KIAA0241                                                                    |   |

|          |                                                                     |                                                                                                                   |   |
|----------|---------------------------------------------------------------------|-------------------------------------------------------------------------------------------------------------------|---|
| AXL      | AXL receptor tyrosine kinase                                        | JTK11, UFO                                                                                                        |   |
| AZI2     | 5-Azacytidine induced 2                                             | AZ2, NAP1, TILP                                                                                                   |   |
| AZIN1    | Antizyme inhibitor                                                  | AZI, AZIA1, OAZI, OAZIN, ODC1L                                                                                    |   |
| B2M      | Beta-2-microglobulin                                                | CDABP0092                                                                                                         |   |
| B3GALNT2 | Beta-1,3-N-acetylgalactosaminyltransferase 2                        | B3GalNAc-T2, MDDGA11                                                                                              |   |
| B3GALT1  | Beta-3-galactosyltransferase 1                                      | beta3Gal-T1                                                                                                       |   |
| B3GALT2  | Beta-3-galactosyltransferase 2                                      | BETA3GALT2, GLCT2, beta3Gal-T2                                                                                    |   |
| B3GALT5  | Beta-3-galactosyltransferase 5                                      | B3GALT-V, B3GALT-X, B3T5, GLCT5, beta-1,3-GalTase 5, KT112-567, CT5.1, B3GLCT5, B3GTL, B3GIC-1, Gal-1, beta3Gal-T |   |
| B3GALTL  | Beta 1,3-galactosyltransferase-like                                 |                                                                                                                   |   |
| B3GNT5   | Beta-1,3-galactosyltransferase 5                                    | B3GN-T5, beta3Gn-T5                                                                                               |   |
| B3GNT6   | Beta-1,3-galactosyltransferase 6                                    | B3Gn-T6, BGnT-6, beta-1,3-Gn-T6, beta3Gn-T6                                                                       |   |
| B3GNT9   | Beta-1,3-galactosyltransferase 9                                    | UNQ1922/PRO4397                                                                                                   |   |
| B4GALT1  | Beta-4-galactosyltransferase 1                                      | B4GAL-T1, CDG2D, GGTB2, GT1, GTB, beta4Gal-T1                                                                     |   |
| B4GALT2  | Beta-4-galactosyltransferase 2                                      | B4Gal-T2, B4Gal-T3, beta4Gal-T2                                                                                   |   |
| B4GALT4  | Beta-4-galactosyltransferase 4                                      | UNQ552/PRO1109, B4Gal-T4, beta4Gal-T4                                                                             |   |
| B4GALT5  | Beta-4-galactosyltransferase 5                                      | KT5-1005B2.1, B4Gal-T5, BETA4-GALT-IV, beta4Gal-T5, beta4Gal-T V, B4V                                             |   |
| B4GALT6  | Beta-4-galactosyltransferase 6                                      | B4Gal-T6, beta4Gal-T6                                                                                             |   |
| B4GALT7  | Beta-4-galactosyltransferase 7                                      | UNQ748/PRO1478, EDSP1, XGALT1, XGPT1                                                                              |   |
| BAAT     | Bile acid CoA:amino acid N-acyltransferase                          | BACAT, BAT                                                                                                        |   |
| BACE2    | Beta-site APP-cleaving enzyme 2                                     | CDAT5, ALPLC, ALP50, ASI1, ASI21, DALZ, CEAT1, DPA                                                                |   |
| BACH1    | BTD and CNC homology 1, basic leucine zipper transcription factor 1 | BACH-1, BTBD24                                                                                                    |   |
| BACH2    | BTD and CNC homology 1, basic leucine zipper transcription factor 2 | RP11-63K6.2, BTBD25                                                                                               |   |
| BAG2     | BCL2-associated athanogene 2                                        | RP3-496N17.2, BAG-2, dJ417I1.2                                                                                    |   |
| BAG4     | BCL2-associated athanogene 4                                        | BAG-4, SODD                                                                                                       |   |
| BAG5     | BCL2-associated athanogene 5                                        | BAG-5                                                                                                             |   |
| BAGE2    | B melanoma antigen family, member 2                                 | CT2.2                                                                                                             |   |
| BAGE5    | B melanoma antigen family, member 5                                 | CT2.5                                                                                                             |   |
| BAI3     | Brain-specific angiogenesis inhibitor 3                             |                                                                                                                   |   |
| BAIAP2   | BAI1-associated protein 2                                           | BAP2, FLAF3, IRSP53                                                                                               |   |
| BAMBI    | BMP and activin membrane-bound inhibitor                            | NMA                                                                                                               |   |
| BANK1    | B-cell scaffold protein with ankyrin repeats                        | BANK                                                                                                              |   |
| BAP1     | BRCAT associated protein-1 (ubiquitin carboxyl-terminal hydrolase)  | hucep-6, HUCEP-13, UCHL2                                                                                          | v |
| BASE     |                                                                     |                                                                                                                   |   |

|          |                                           |                                             |   |
|----------|-------------------------------------------|---------------------------------------------|---|
| BAT1     |                                           |                                             |   |
| BAT2     |                                           |                                             |   |
| BAT2L2   |                                           |                                             |   |
| BAT5     |                                           |                                             |   |
| BAX      | BCL2-associated X protein                 | BCL2L4                                      |   |
| BAZ1A    | Bromodomain adjacent to zinc finger       | HSPC317, ACF1, WALp1, WCRF180, hACF1        |   |
| BAZ1B    | Bromodomain adjacent to zinc finger       | WBSCR10, WBSCR9, WSTF                       |   |
| BAZ2A    | Bromodomain adjacent to zinc finger       | TIP5, WALp3                                 |   |
| BAZ2B    | Bromodomain adjacent to zinc finger       | WALp4                                       |   |
| BBOX1    | butyrobetaine (gamma), z-oxoglutarate     | BBH, BBOX, G-BBH, gamma-BBH                 |   |
| BBS12    | Bardet-Biedl syndrome 12                  | C4orf24                                     |   |
| BBS2     | Bardet-Biedl syndrome 2                   | BBS                                         |   |
| BBS4     | Bardet-Biedl syndrome 4                   |                                             |   |
| BBS7     | Bardet-Biedl syndrome 7                   | BBS2L1                                      |   |
| BBS9     | Bardet-Biedl syndrome 9                   | B1, C18, D1, PTHB1                          |   |
| BBX      | Bobby sox homolog (Drosophila)            | ARTC1, HBP2, HSPC339, MDS001                |   |
| BC036928 |                                           |                                             |   |
| BCAM     | Basal cell adhesion molecule (Lutheran    | AU, CD239, LU, MSK19                        |   |
| BCAP29   | B-cell receptor-associated protein 29     | BAP29                                       |   |
| BCAR3    | Breast cancer anti-estrogen resistance 3  | RP5-1033H22.1, NSP2, SH2D3B                 |   |
| BCAS1    | Breast carcinoma amplified sequence 1     | AIBC1, NABC1                                |   |
| BCAS4    | Breast carcinoma amplified sequence 4     | RP5-1071L10.2, CNOL                         |   |
| BCAT1    | Branched chain amino-acid transaminase 1, | RP11-025E10.4, BCATC, BCT1, BCAS9, MECA59,  |   |
| BCAT2    | Branched chain amino-acid transaminase 2, | DNAS121, DD18                               |   |
| BCHE     | mitochondrial                             | BCAM, BCATM, BCT2, PP18                     |   |
| BCHE     | Butyrylcholinesterase                     | CHE1, CHE2, E1                              |   |
| BCL11A   | B-cell CLL/lymphoma 11A (zinc finger      | BCL11A-L3, BCL11A-AL, BCL11A-M, CHT1, EVD9, | √ |
| BCL2     | protein)                                  | UBEOTL5, ZNF856, BCL11A                     |   |
| BCL2     | B-cell CLL/lymphoma 2                     | Bcl-2, PPP1R50                              | √ |
| BCL2L11  | BCL2-like 11 (apoptosis facilitator)      | BAM, BIM, BOD                               |   |
| BCL2L15  | BCL2-like 15                              | Bfk, C1orf178                               |   |
| BCL2L2   | BCL2-like 2                               | BCL-W, BCL2-L-2, BCLW, PPP1R51              |   |
| BCL6     | B-cell CLL/lymphoma 6                     | BCL5A, LAZ3, ZBTB27, ZNF51, BCL6            | √ |
| BCL6B    | B-cell CLL/lymphoma 6, member B           | BAZF, ZBTB28, ZNF62                         |   |
| BCL7A    | B-cell CLL/lymphoma 7A                    | BCL7                                        | √ |

|         |                                                                                 |                                                          |   |
|---------|---------------------------------------------------------------------------------|----------------------------------------------------------|---|
| BCL9    | B-cell CLL/lymphoma 9                                                           | LGS                                                      | √ |
| BCLAF1  | BCL2-associated transcription factor 1                                          | BTF, bK211L9.1                                           |   |
| BCO2    | Beta-carotene oxygenase 2                                                       | B-DIOX-II, BCDO2                                         |   |
| BCOR    | BCL6 corepressor                                                                | ANOP2, MAA2, MCOPS2                                      | √ |
| BCR     | Breakpoint cluster region                                                       | ALL1, CML, D22S11, D22S662, PHL, BC                      | √ |
| BDH1    | 3-hydroxybutyrate dehydrogenase, type 1                                         | BDH, SDR9C1                                              |   |
| BDKRB2  | Bradykinin receptor B2                                                          | B2R, BK-2, BK2, BKR2, BRB2                               |   |
| BDNFOS  | BDNF antisense RNA                                                              | BDNF, BDNFOS, BDNF-AS1, ANTI-BDNF,                       |   |
| BDP1    | B double prime 1, subunit of RNA polymerase III transcription initiation factor | NSR258920, TAF5B1, TFC5, TFIIB, TFIIB150, TFIIB90, TFIIB |   |
| BEND3   | BEN domain containing 3                                                         | RP11-59I9.2, KIAA1553                                    |   |
| BEND4   | BEN domain containing 4                                                         | CCDC4                                                    |   |
| BEND6   | BEN domain containing 6                                                         | RP11-203B9.5, C6orf65, bA203B9.1                         |   |
| BEND7   | BEN domain containing 7                                                         | C10orf30                                                 |   |
| BEST4   | Bestrophin 4                                                                    | RP11-269F19.5, VMD2L2                                    |   |
| BET1    | Bet1 golgi vesicular membrane trafficking protein like                          | HBET1                                                    |   |
| BET1L   | Bet1 golgi vesicular membrane trafficking protein like                          | BET1L1, GOLIM3, GS15, HSPC197                            |   |
| BEX2    | Brain expressed X-linked 2                                                      | RP1-79P11.1, BEX1, DJ79P11.1                             |   |
| BEX4    | Brain expressed, X-linked 4                                                     | RP4-635G19.2, BEXL1                                      |   |
| BEYLA   |                                                                                 |                                                          |   |
| BHLHE22 | Basic helix-loop-helix family, member e22                                       | BHLHB5, Beta3, CAGL85, TNRC20                            |   |
| BHLHE40 | Basic helix-loop-helix family, member e40                                       | BHLHB2, DEC1, HLHB2, SHARP-2, STRA13, Stra14             |   |
| BHMT2   | Betaine-homocysteine S-methyltransferase 2                                      |                                                          |   |
| BICD2   | Bicaudal D homolog 2 (Drosophila)                                               | RP11-476B13.3, SMALED2, bA526D8.1                        |   |
| BID     | BH3 interacting domain death agonist                                            | FP497                                                    |   |
| BIRC5   | Baculoviral IAP repeat containing 5                                             | API4, EPR-1                                              |   |
| BIRC6   | Baculoviral IAP repeat containing 6                                             | APOLLON, BRUCE                                           |   |
| BIVM    | Basic, immunoglobulin-like variable motif containing                            | RP11-484I6.1                                             |   |
| BLCAP   | Bladder cancer associated protein                                               | RP11-425M5.2, BC10                                       |   |
| BLOC1S2 | Biogenesis of lysosomal organelles complex-1, subunit 2                         | RP11-316M21.4, BLOS2, CEAP, CEAP11                       |   |
| BLZF1   | Basic leucine zipper nuclear factor 1                                           | RP1-206D15.1, GOLGIN-45, JEM-1, JEM-1s, JEM1             |   |
| BMF     | Bcl2 modifying factor                                                           |                                                          |   |
| BMP1    | Bone morphogenetic protein 1                                                    | OI13, PCOLC, PCP, PCP2, TLD                              |   |
| BMP2    | Bone morphogenetic protein 2                                                    | BDA2A,BMP2                                               |   |

|        |                                                                                    |                                                                                                                                                                                                                                                                                                                                                                                                                                                                                                                                                                                                                                                                                                                                                                                                                                                                                                                    |   |
|--------|------------------------------------------------------------------------------------|--------------------------------------------------------------------------------------------------------------------------------------------------------------------------------------------------------------------------------------------------------------------------------------------------------------------------------------------------------------------------------------------------------------------------------------------------------------------------------------------------------------------------------------------------------------------------------------------------------------------------------------------------------------------------------------------------------------------------------------------------------------------------------------------------------------------------------------------------------------------------------------------------------------------|---|
| BMP3   | Bone morphogenetic protein 3                                                       | BMP-3A                                                                                                                                                                                                                                                                                                                                                                                                                                                                                                                                                                                                                                                                                                                                                                                                                                                                                                             |   |
| BMP7   | Bone morphogenetic protein                                                         | RP11-560A15.5, OP-1                                                                                                                                                                                                                                                                                                                                                                                                                                                                                                                                                                                                                                                                                                                                                                                                                                                                                                |   |
| BMP8A  | Bone morphogenetic protein 8a                                                      |                                                                                                                                                                                                                                                                                                                                                                                                                                                                                                                                                                                                                                                                                                                                                                                                                                                                                                                    |   |
| BMP8B  | Bone morphogenetic protein 8b                                                      | BMP8, OP2                                                                                                                                                                                                                                                                                                                                                                                                                                                                                                                                                                                                                                                                                                                                                                                                                                                                                                          |   |
| BMPER  | BMP binding endothelial regulator                                                  | CRIM3, CV-2, CV2                                                                                                                                                                                                                                                                                                                                                                                                                                                                                                                                                                                                                                                                                                                                                                                                                                                                                                   |   |
| BMPR2  | Bone morphogenetic protein receptor, type II (serine/threonine kinase)             | BMPRII, BMPRI3, BMPRI4, BMPRI5, BMPRI6, BMPRI7, BMPRI8, BMPRI9, BMPRI10, BMPRI11, BMPRI12, BMPRI13, BMPRI14, BMPRI15, BMPRI16, BMPRI17, BMPRI18, BMPRI19, BMPRI20, BMPRI21, BMPRI22, BMPRI23, BMPRI24, BMPRI25, BMPRI26, BMPRI27, BMPRI28, BMPRI29, BMPRI30, BMPRI31, BMPRI32, BMPRI33, BMPRI34, BMPRI35, BMPRI36, BMPRI37, BMPRI38, BMPRI39, BMPRI40, BMPRI41, BMPRI42, BMPRI43, BMPRI44, BMPRI45, BMPRI46, BMPRI47, BMPRI48, BMPRI49, BMPRI50, BMPRI51, BMPRI52, BMPRI53, BMPRI54, BMPRI55, BMPRI56, BMPRI57, BMPRI58, BMPRI59, BMPRI60, BMPRI61, BMPRI62, BMPRI63, BMPRI64, BMPRI65, BMPRI66, BMPRI67, BMPRI68, BMPRI69, BMPRI70, BMPRI71, BMPRI72, BMPRI73, BMPRI74, BMPRI75, BMPRI76, BMPRI77, BMPRI78, BMPRI79, BMPRI80, BMPRI81, BMPRI82, BMPRI83, BMPRI84, BMPRI85, BMPRI86, BMPRI87, BMPRI88, BMPRI89, BMPRI90, BMPRI91, BMPRI92, BMPRI93, BMPRI94, BMPRI95, BMPRI96, BMPRI97, BMPRI98, BMPRI99, BMPRI100 |   |
| BMS1   | BMS1 ribosome biogenesis factor                                                    | AL022344.1, ACCL, BMS1                                                                                                                                                                                                                                                                                                                                                                                                                                                                                                                                                                                                                                                                                                                                                                                                                                                                                             |   |
| BNC2   | Basonuclin 2                                                                       | RP11-183I6.1, BSN2                                                                                                                                                                                                                                                                                                                                                                                                                                                                                                                                                                                                                                                                                                                                                                                                                                                                                                 |   |
| BNIP2  | BCL2/adenovirus E1B 19 kDa interacting protein 2                                   | BNIP-2, NIP2                                                                                                                                                                                                                                                                                                                                                                                                                                                                                                                                                                                                                                                                                                                                                                                                                                                                                                       |   |
| BNIP1  | BCL2/adenovirus E1B 19 kDa interacting protein 1                                   | BNIP1, BNIP2, BNIP3, BNIP4, BNIP5, BNIP6, BNIP7, BNIP8, BNIP9, BNIP10, BNIP11, BNIP12, BNIP13, BNIP14, BNIP15, BNIP16, BNIP17, BNIP18, BNIP19, BNIP20, BNIP21, BNIP22, BNIP23, BNIP24, BNIP25, BNIP26, BNIP27, BNIP28, BNIP29, BNIP30, BNIP31, BNIP32, BNIP33, BNIP34, BNIP35, BNIP36, BNIP37, BNIP38, BNIP39, BNIP40, BNIP41, BNIP42, BNIP43, BNIP44, BNIP45, BNIP46, BNIP47, BNIP48, BNIP49, BNIP50, BNIP51, BNIP52, BNIP53, BNIP54, BNIP55, BNIP56, BNIP57, BNIP58, BNIP59, BNIP60, BNIP61, BNIP62, BNIP63, BNIP64, BNIP65, BNIP66, BNIP67, BNIP68, BNIP69, BNIP70, BNIP71, BNIP72, BNIP73, BNIP74, BNIP75, BNIP76, BNIP77, BNIP78, BNIP79, BNIP80, BNIP81, BNIP82, BNIP83, BNIP84, BNIP85, BNIP86, BNIP87, BNIP88, BNIP89, BNIP90, BNIP91, BNIP92, BNIP93, BNIP94, BNIP95, BNIP96, BNIP97, BNIP98, BNIP99, BNIP100                                                                                             |   |
| BNIP2  | BCL2/adenovirus E1B 19 kDa interacting protein 2                                   | BNIP-2, NIP2                                                                                                                                                                                                                                                                                                                                                                                                                                                                                                                                                                                                                                                                                                                                                                                                                                                                                                       |   |
| BNIP1  | BCL2/adenovirus E1B 19 kDa interacting protein 1                                   | BNIP1, BNIP2, BNIP3, BNIP4, BNIP5, BNIP6, BNIP7, BNIP8, BNIP9, BNIP10, BNIP11, BNIP12, BNIP13, BNIP14, BNIP15, BNIP16, BNIP17, BNIP18, BNIP19, BNIP20, BNIP21, BNIP22, BNIP23, BNIP24, BNIP25, BNIP26, BNIP27, BNIP28, BNIP29, BNIP30, BNIP31, BNIP32, BNIP33, BNIP34, BNIP35, BNIP36, BNIP37, BNIP38, BNIP39, BNIP40, BNIP41, BNIP42, BNIP43, BNIP44, BNIP45, BNIP46, BNIP47, BNIP48, BNIP49, BNIP50, BNIP51, BNIP52, BNIP53, BNIP54, BNIP55, BNIP56, BNIP57, BNIP58, BNIP59, BNIP60, BNIP61, BNIP62, BNIP63, BNIP64, BNIP65, BNIP66, BNIP67, BNIP68, BNIP69, BNIP70, BNIP71, BNIP72, BNIP73, BNIP74, BNIP75, BNIP76, BNIP77, BNIP78, BNIP79, BNIP80, BNIP81, BNIP82, BNIP83, BNIP84, BNIP85, BNIP86, BNIP87, BNIP88, BNIP89, BNIP90, BNIP91, BNIP92, BNIP93, BNIP94, BNIP95, BNIP96, BNIP97, BNIP98, BNIP99, BNIP100                                                                                             |   |
| BOD1   | Biorientation of chromosomes in cell division 1                                    | FAM44B                                                                                                                                                                                                                                                                                                                                                                                                                                                                                                                                                                                                                                                                                                                                                                                                                                                                                                             |   |
| BOD1L  | Biorientation of chromosomes in cell division 1-like 1                             | BOD1L, FAM44A                                                                                                                                                                                                                                                                                                                                                                                                                                                                                                                                                                                                                                                                                                                                                                                                                                                                                                      |   |
| BOK    | BCL2-related ovarian killer                                                        | BCL2L9L, BOK                                                                                                                                                                                                                                                                                                                                                                                                                                                                                                                                                                                                                                                                                                                                                                                                                                                                                                       |   |
| BOLL   | Boule-like RNA-binding protein                                                     | BOULE                                                                                                                                                                                                                                                                                                                                                                                                                                                                                                                                                                                                                                                                                                                                                                                                                                                                                                              |   |
| BPESC1 | Brepharopinnosis, epicanthus inversus and ectopic candidate 1 (non-protein coding) | NCRNA00187                                                                                                                                                                                                                                                                                                                                                                                                                                                                                                                                                                                                                                                                                                                                                                                                                                                                                                         |   |
| BPIL2  | BPI fold containing family C                                                       | RP1-149A16.10-011, BPIL2                                                                                                                                                                                                                                                                                                                                                                                                                                                                                                                                                                                                                                                                                                                                                                                                                                                                                           |   |
| BPNT1  | 3'(2'), 5'-Bisphosphate nucleotidase 1                                             | HEL20, PIP                                                                                                                                                                                                                                                                                                                                                                                                                                                                                                                                                                                                                                                                                                                                                                                                                                                                                                         |   |
| BPTF   | Bromodomain PHD finger transcription factor                                        | FAC1, FALZ, NURF301                                                                                                                                                                                                                                                                                                                                                                                                                                                                                                                                                                                                                                                                                                                                                                                                                                                                                                |   |
| BPY2   | Basic charge, Y-linked, 2                                                          | BPY2A, VCY2, VCY2A                                                                                                                                                                                                                                                                                                                                                                                                                                                                                                                                                                                                                                                                                                                                                                                                                                                                                                 |   |
| BRAP   | BRCA1 associated protein                                                           | BRAP2, IMP, RNF52                                                                                                                                                                                                                                                                                                                                                                                                                                                                                                                                                                                                                                                                                                                                                                                                                                                                                                  |   |
| BRCA1  | Breast cancer 1, early onset                                                       | CAL, BRCC1, BROVCA1, INB, FNCA4, FTTKJ5, RSCB, RNF52                                                                                                                                                                                                                                                                                                                                                                                                                                                                                                                                                                                                                                                                                                                                                                                                                                                               | v |
| BRCC3  | BRCA1/BRCA2-containing complex, subunit 3                                          | RP11-143H17.26, C6.1A, CXorf53, BRCC3                                                                                                                                                                                                                                                                                                                                                                                                                                                                                                                                                                                                                                                                                                                                                                                                                                                                              |   |
| BRD1   | Bromodomain containing 1                                                           | RP3-522J7.4, BRL, BRPF1, BRPF2                                                                                                                                                                                                                                                                                                                                                                                                                                                                                                                                                                                                                                                                                                                                                                                                                                                                                     |   |
| BRDT   | Bromodomain, testis-specific                                                       | BRD6, CT9                                                                                                                                                                                                                                                                                                                                                                                                                                                                                                                                                                                                                                                                                                                                                                                                                                                                                                          |   |
| BRE    | Bromodomain, testis-specific                                                       | BRD6, CT9                                                                                                                                                                                                                                                                                                                                                                                                                                                                                                                                                                                                                                                                                                                                                                                                                                                                                                          |   |
| BRMS1L | Breast cancer metastasis-suppressor 1-like                                         | BRMS1                                                                                                                                                                                                                                                                                                                                                                                                                                                                                                                                                                                                                                                                                                                                                                                                                                                                                                              |   |
| BRPF3  | Bromodomain and PHD finger containing, 3                                           | RP3-524E15.1                                                                                                                                                                                                                                                                                                                                                                                                                                                                                                                                                                                                                                                                                                                                                                                                                                                                                                       |   |
| BRWD1  | Bromodomain and WD repeat domain containing 1                                      | C21orf107, N143, WDR9                                                                                                                                                                                                                                                                                                                                                                                                                                                                                                                                                                                                                                                                                                                                                                                                                                                                                              |   |
| BSDC1  | BSD domain containing 1                                                            | RP4-811H24.7                                                                                                                                                                                                                                                                                                                                                                                                                                                                                                                                                                                                                                                                                                                                                                                                                                                                                                       |   |
| BSN    | Bassoon presynaptic cytomatrix protein                                             | ZNF231                                                                                                                                                                                                                                                                                                                                                                                                                                                                                                                                                                                                                                                                                                                                                                                                                                                                                                             |   |
| BSPRY  | B-box and SPRY domain containing                                                   |                                                                                                                                                                                                                                                                                                                                                                                                                                                                                                                                                                                                                                                                                                                                                                                                                                                                                                                    |   |
| BTAFL1 | BTAFL RNA polymerase II, B-TAFII transcription factor associated, 170 kDa          | MOT1, TAF(II)170, TAF172, TAFIII170                                                                                                                                                                                                                                                                                                                                                                                                                                                                                                                                                                                                                                                                                                                                                                                                                                                                                |   |
| BTBD10 | BTB (POZ) domain containing 10                                                     | GMRP-1, GMRP1                                                                                                                                                                                                                                                                                                                                                                                                                                                                                                                                                                                                                                                                                                                                                                                                                                                                                                      |   |

|           |                                                               |                                                                             |   |
|-----------|---------------------------------------------------------------|-----------------------------------------------------------------------------|---|
| BTBD11    | BTB (POZ) domain containing 11                                | ABTB2B                                                                      |   |
| BTBD12    |                                                               |                                                                             |   |
| BTBD3     | BTB (POZ) domain containing 3                                 | RP4-742J24.3, dJ742J24.1                                                    |   |
| BTBD7     | BTB (POZ) domain containing 7                                 | FUP1                                                                        |   |
| BTBD8     | BTB (POZ) domain containing 8                                 |                                                                             |   |
| BTBD9     | BTB (POZ) domain containing 9                                 | RP3-322I12.1, dJ322I12.1                                                    |   |
| BTC       | Betacellulin                                                  |                                                                             |   |
| BTF3L4    | Basic transcription factor 3-like 4                           | RP4-800M22.5                                                                |   |
| BTG1      | B-cell translocation gene 1, anti-proliferative               | B-cell translocation gene 1, anti-proliferative                             | v |
| BTG2      | BTG family, member 2                                          | PC3, TIS21                                                                  |   |
| BTLA      | B and T lymphocyte associated                                 | BTLA1, CD272                                                                |   |
| BTN2A1    | Butyrophilin, subfamily 2, member A1                          | C1A-141D.1, DK141D.1, BT2.1, BT11, BTN2.1, BT2E1.1                          |   |
| BTN3A1    | Butyrophilin, subfamily 3, member A1                          | RP1-45P21.1, BT3.1, BTF5, BTN3.1, CD277                                     |   |
| BTNL3     | Butyrophilin-like 3                                           | UNQ744/PRO1472, BTN9.1, BTNLR                                               |   |
| BTNL8     | Butyrophilin-like 8                                           | UNQ702/PRO1347, BTN9.2                                                      |   |
| BTRC      | Beta-transducin repeat containing E3 ubiquitin protein ligase | RP11-529H0.2, BETA-TRCP, FBW1A, FBXW1, FRYW1A, FWD1, LT-CP, LT-CP1, hscT-CP |   |
| BUB3      | BUB3 mitotic checkpoint protein                               | BUB3L, hBUB3                                                                |   |
| BUD31     | BUD31 homolog <i>B1028</i>                                    | Cwc14, EDG-2, EDG2, G10, YCR063W, fSAP17                                    |   |
| BVES      | Blood vessel epicardial substance                             | RP3-522O2.1, HBVES, POP1, POPDC1                                            |   |
| BZW2      | Basic leucine zipper and W2 domains 2                         | HSPC028, MST017, MSTP017                                                    |   |
| C10orf10  | Chromosome 10 open reading frame 10                           | DEPP, FIG, Fseg                                                             |   |
| C10orf108 |                                                               |                                                                             |   |
| C10orf112 |                                                               |                                                                             |   |
| C10orf116 |                                                               |                                                                             |   |
| C10orf118 |                                                               |                                                                             |   |
| C10orf119 |                                                               |                                                                             |   |
| C10orf12  | Chromosome 10 open reading frame 12                           |                                                                             |   |
| C10orf122 |                                                               |                                                                             |   |
| C10orf4   | Chromosome 10 open reading frame 4                            |                                                                             |   |
| C10orf41  | Chromosome 10 open reading frame 4                            |                                                                             |   |
| C10orf44  |                                                               |                                                                             |   |
| C10orf46  |                                                               |                                                                             |   |
| C10orf54  | Chromosome 10 open reading frame 54                           | RP11-472K8.3, B7-H5, B7H5, GI24, PP2135, SISP1                              |   |

|          |                                     |                                         |  |
|----------|-------------------------------------|-----------------------------------------|--|
| C10orf67 | Chromosome 10 open reading frame 67 | RP11-792P23.2                           |  |
| C10orf68 |                                     |                                         |  |
| C10orf72 |                                     |                                         |  |
| C10orf75 |                                     |                                         |  |
| C10orf76 | Chromosome 10 open reading frame 76 | RP11-190J1.9                            |  |
| C10orf78 |                                     |                                         |  |
| C10orf79 |                                     |                                         |  |
| C10orf84 |                                     |                                         |  |
| C10orf88 | Chromosome 10 open reading frame 88 |                                         |  |
| C10orf96 |                                     |                                         |  |
| C11orf16 | Chromosome 11 open reading frame 16 |                                         |  |
| C11orf17 |                                     |                                         |  |
| C11orf30 |                                     |                                         |  |
| C11orf34 |                                     |                                         |  |
| C11orf41 |                                     |                                         |  |
| C11orf46 |                                     |                                         |  |
| C11orf53 | Chromosome 11 open reading frame 53 |                                         |  |
| C11orf58 | Chromosome 11 open reading frame 58 | IMAGE145052, SMAP                       |  |
| C11orf59 |                                     |                                         |  |
| C11orf64 |                                     |                                         |  |
| C11orf68 | Chromosome 11 open reading frame 68 | BLES03, P5326                           |  |
| C11orf71 | Chromosome 11 open reading frame 71 |                                         |  |
| C11orf73 | Chromosome 11 open reading frame 73 | HSPC138, HSPC179, Hikeshi, L7RN6, OPI10 |  |
| C11orf74 | Chromosome 11 open reading frame 74 | HEPIS                                   |  |
| C11orf75 |                                     |                                         |  |
| C11orf76 |                                     |                                         |  |
| C11orf87 | Chromosome 11 open reading frame 87 | LOH11CR1A, NEURIM1                      |  |
| C11orf92 |                                     |                                         |  |
| C12orf12 |                                     |                                         |  |
| C12orf23 |                                     |                                         |  |
| C12orf29 | Chromosome 12 open reading frame 29 |                                         |  |
| C12orf34 |                                     |                                         |  |
| C12orf35 |                                     |                                         |  |

|           |                                      |                          |  |
|-----------|--------------------------------------|--------------------------|--|
| C12orf4   | Chromosome 12 open reading frame 4   |                          |  |
| C12orf41  |                                      |                          |  |
| C12orf49  | Chromosome 12 open reading frame 49  |                          |  |
| C12orf5   | Chromosome 12 open reading frame 5   | FR2BP, TIGAR             |  |
| C12orf51  |                                      |                          |  |
| C12orf56  | Chromosome 12 open reading frame 56  |                          |  |
| C12orf62  |                                      |                          |  |
| C12orf64  |                                      |                          |  |
| C12orf66  | Chromosome 12 open reading frame 66  |                          |  |
| C12orf68  |                                      |                          |  |
| C12orf69  |                                      |                          |  |
| C12orf72  |                                      |                          |  |
| C12orf75  | Chromosome 12 open reading frame 75  | AGD3, OCC-1, OCC1        |  |
| C12orf76  | Chromosome 12 open reading frame 76  |                          |  |
| C12orf77  | Chromosome 12 open reading frame 77  |                          |  |
| C13orf1   | Chromosome 13 open reading frame 1   |                          |  |
| C13orf23  |                                      |                          |  |
| C13orf30  |                                      |                          |  |
| C13orf34  |                                      |                          |  |
| C13orf36  |                                      |                          |  |
| C13orf37  |                                      |                          |  |
| C13orf38  |                                      |                          |  |
| C14orf101 |                                      |                          |  |
| C14orf118 |                                      |                          |  |
| C14orf119 | Chromosome 14 open reading frame 119 | My028                    |  |
| C14orf126 | Chromosome 14 open reading frame 126 | MGC9912                  |  |
| C14orf129 |                                      |                          |  |
| C14orf135 |                                      |                          |  |
| C14orf139 |                                      |                          |  |
| C14orf142 | Chromosome 14 open reading frame 142 | PNAS-127                 |  |
| C14orf143 |                                      |                          |  |
| C14orf153 |                                      |                          |  |
| C14orf169 | Chromosome 14 open reading frame 169 | MAPJD, NO66, ROX, hsNO66 |  |



|           |                                      |                         |  |
|-----------|--------------------------------------|-------------------------|--|
| C14orf177 | Chromosome 14 open reading frame 177 |                         |  |
| C14orf178 | Chromosome 14 open reading frame 178 |                         |  |
| C14orf181 | Chromosome 14 open reading frame 181 |                         |  |
| C14orf184 | Chromosome 14 open reading frame 184 | PP8961                  |  |
| C14orf2   | Chromosome 14 open reading frame 2   | PRO1574, MP68, PLPM     |  |
| C14orf28  | Chromosome 14 open reading frame 28  | DRIP-1, DRIP1, c14_5270 |  |
| C14orf37  | Chromosome 14 open reading frame 37  | c14_5376                |  |
| C14orf4   |                                      |                         |  |
| C14orf41  | Chromosome 14 open reading frame 41  | c14_5527                |  |
| C14orf43  |                                      |                         |  |
| C14orf45  | Chromosome 14 open reading frame 45  |                         |  |
| C15orf2   |                                      |                         |  |
| C15orf23  |                                      |                         |  |
| C15orf26  | Chromosome 15 open reading frame 26  |                         |  |
| C15orf29  |                                      |                         |  |
| C15orf34  |                                      |                         |  |
| C15orf48  | Chromosome 15 open reading frame 48  | FOAP-11, NMES1          |  |
| C15orf50  |                                      |                         |  |
| C15orf52  | Chromosome 15 open reading frame 52  |                         |  |
| C15orf54  | Chromosome 15 open reading frame 54  |                         |  |
| C15orf56  | Chromosome 15 open reading frame 56  |                         |  |
| C16orf46  | Chromosome 16 open reading frame 46  |                         |  |
| C16orf53  |                                      |                         |  |
| C16orf55  |                                      |                         |  |
| C16orf62  | Chromosome 16 open reading frame 62  | 101F10.2                |  |
| C16orf63  |                                      |                         |  |
| C16orf70  | Chromosome 16 open reading frame 70  | C16orf6, LIN10, lin-10  |  |
| C16orf71  | Chromosome 16 open reading frame 71  |                         |  |
| C16orf72  | Chromosome 16 open reading frame 72  | PRO0149                 |  |
| C16orf75  |                                      |                         |  |
| C16orf87  | Chromosome 16 open reading frame 87  |                         |  |
| C16orf90  | Chromosome 16 open reading frame 90  |                         |  |
| C17orf100 | Chromosome 17 open reading frame 100 | hCG_1985469             |  |

|           |                                      |                                    |  |
|-----------|--------------------------------------|------------------------------------|--|
| C17orf102 | Chromosome 17 open reading frame 102 |                                    |  |
| C17orf104 | Chromosome 17 open reading frame 104 |                                    |  |
| C17orf108 |                                      |                                    |  |
| C17orf39  |                                      |                                    |  |
| C17orf51  | Chromosome 17 open reading frame 51  |                                    |  |
| C17orf53  | Chromosome 17 open reading frame 53  |                                    |  |
| C17orf54  |                                      |                                    |  |
| C17orf57  |                                      |                                    |  |
| C17orf59  | Chromosome 17 open reading frame 59  | PRO2472                            |  |
| C17orf63  |                                      |                                    |  |
| C17orf69  |                                      |                                    |  |
| C17orf72  |                                      |                                    |  |
| C17orf76  |                                      |                                    |  |
| C17orf80  | Chromosome 17 open reading frame 80  | HLC8, HLC-8, MIG3, SPEP1           |  |
| C17orf85  | Chromosome 17 open reading frame 85  | ELG, HSA277841                     |  |
| C17orf87  |                                      |                                    |  |
| C17orf91  |                                      |                                    |  |
| C18orf1   |                                      |                                    |  |
| C18orf16  |                                      |                                    |  |
| C18orf19  |                                      |                                    |  |
| C18orf20  |                                      |                                    |  |
| C18orf21  | Chromosome 18 open reading frame 21  | PNAS-124, HsT3108, PNAS-131, XTP13 |  |
| C18orf22  |                                      |                                    |  |
| C18orf25  | Chromosome 18 open reading frame 25  | ARKL1, RNF111L1                    |  |
| C18orf34  |                                      |                                    |  |
| C18orf45  |                                      |                                    |  |
| C18orf49  | Chromosome 18 open reading frame 49  |                                    |  |
| C18orf54  | Chromosome 18 open reading frame 54  | LAS2                               |  |
| C18orf55  |                                      |                                    |  |
| C18orf8   | Chromosome 18 open reading frame 8   | HsT2591, MIC1, Mic-1               |  |
| C19orf12  | Chromosome 19 open reading frame 12  | NBIA3, NBIA4, SPG43                |  |
| C19orf2   |                                      |                                    |  |
| C19orf25  | Chromosome 19 open reading frame 25  |                                    |  |

|          |                                                            |                    |  |
|----------|------------------------------------------------------------|--------------------|--|
| C19orf28 |                                                            |                    |  |
| C19orf42 |                                                            |                    |  |
| C19orf44 | Chromosome 19 open reading frame 44                        |                    |  |
| C19orf50 |                                                            |                    |  |
| C19orf54 | Chromosome 19 open reading frame 54                        |                    |  |
| C19orf59 |                                                            |                    |  |
| C19orf61 |                                                            |                    |  |
| C19orf62 |                                                            |                    |  |
| C19orf63 |                                                            |                    |  |
| C19orf66 | Chromosome 19 open reading frame 66                        |                    |  |
| C19orf75 |                                                            |                    |  |
| C1GALT1  | Core 1 synthase, glycoprotein-N-acetylglucosaminase 2 beta | C1GALT, T-synthase |  |
| C1orf107 |                                                            |                    |  |
| C1orf109 | Chromosome 1 open reading frame 109                        |                    |  |
| C1orf110 | Chromosome 1 open reading frame 110                        | RP11-331H2.2       |  |
| C1orf112 | Chromosome 1 open reading frame 112                        | RP1-97P20.1        |  |
| C1orf113 |                                                            |                    |  |
| C1orf116 | Chromosome 1 open reading frame 116                        | SARG               |  |
| C1orf125 |                                                            |                    |  |
| C1orf131 | Chromosome 1 open reading frame 131                        | RP4-609B14.1       |  |
| C1orf146 | Chromosome 1 open reading frame 146                        | RP11-163M2.3       |  |
| C1orf151 |                                                            |                    |  |
| C1orf161 |                                                            |                    |  |
| C1orf167 | Chromosome 1 open reading frame 167                        | RP11-56N19.2       |  |
| C1orf168 | Chromosome 1 open reading frame 168                        | RP4-758N20.2       |  |
| C1orf174 | Chromosome 1 open reading frame 174                        | RP13-531C17.2      |  |
| C1orf175 |                                                            |                    |  |
| C1orf180 | Chromosome 1 open reading frame 180                        |                    |  |
| C1orf185 | Chromosome 1 open reading frame 185                        | RP11-296A18.1      |  |
| C1orf186 | Chromosome 1 open reading frame 186                        |                    |  |
| C1orf21  | Chromosome 1 open reading frame 21                         | RP4-768P8.1, PIG13 |  |
| C1orf211 |                                                            |                    |  |
| C1orf220 | Chromosome 1 open reading frame 220                        | RP5-990P15.2       |  |

|           |                                                 |                                                               |  |
|-----------|-------------------------------------------------|---------------------------------------------------------------|--|
| C1orf226  | Chromosome 1 open reading frame 226             | hCG_2036738                                                   |  |
| C1orf27   | Chromosome 1 open reading frame 27              | ODR4, TTG1, odr-4                                             |  |
| C1orf43   | Chromosome 1 open reading frame 43              | HSPC012, NICE-3, NS5ATP4, S863-3                              |  |
| C1orf50   | Chromosome 1 open reading frame 50              |                                                               |  |
| C1orf52   | Chromosome 1 open reading frame 52              | GM117, gm117                                                  |  |
| C1orf56   | Chromosome 1 open reading frame 56              | RP11-316M1.9, MENT                                            |  |
| C1orf57   |                                                 |                                                               |  |
| C1orf63   |                                                 |                                                               |  |
| C1orf69   |                                                 |                                                               |  |
| C1orf83   |                                                 |                                                               |  |
| C1orf84   | Chromosome 1 open reading frame 84              | RP11-506B15.1, SZT2A                                          |  |
| C1orf9    | Chromosome 1 open reading frame 9               |                                                               |  |
| C1orf93   |                                                 |                                                               |  |
| C1orf96   |                                                 |                                                               |  |
| C1QTNF2   | C1q and tumor necrosis factor related protein 2 | UNQ6349/PRO21054, CTRP2, zacrp2                               |  |
| C1QTNF3   | C1q and tumor necrosis factor related protein 3 | UNQ7557/PRO1484, C1QTNF3, COKCS, COKS, COKS-26, COKS26, CTRP3 |  |
| C1QTNF7   | C1q and tumor necrosis factor related protein 7 | CTRP7, ZACRP7                                                 |  |
| C1RL      | Complement component 1, r subcomponent-1        | C1RL1P, C1r-LP, CLSPa, C1RL                                   |  |
| C20orf103 |                                                 |                                                               |  |
| C20orf112 |                                                 |                                                               |  |
| C20orf12  |                                                 |                                                               |  |
| C20orf191 | Chromosome 20 open reading frame 191            | bB329D4.2                                                     |  |
| C20orf194 |                                                 |                                                               |  |
| C20orf199 |                                                 |                                                               |  |
| C20orf24  | Chromosome 20 open reading frame 24             | PNAS-11, RIP5                                                 |  |
| C20orf29  |                                                 |                                                               |  |
| C20orf30  |                                                 |                                                               |  |
| C20orf72  |                                                 |                                                               |  |
| C20orf85  | Chromosome 20 open reading frame 85             | LLC1, bA196N14.1                                              |  |
| C21orf105 | Chromosome 21 open reading frame 105            |                                                               |  |
| C21orf119 | Chromosome 21 open reading frame 119            | PRED84                                                        |  |
| C21orf125 |                                                 |                                                               |  |
| C21orf129 |                                                 |                                                               |  |

|          |                                          |                                       |  |
|----------|------------------------------------------|---------------------------------------|--|
| C21orf34 | Chromosome 21 open reading frame 34      |                                       |  |
| C21orf49 | Chromosome 21 open reading frame 49      |                                       |  |
| C21orf74 |                                          |                                       |  |
| C21orf82 |                                          |                                       |  |
| C21orf91 | Chromosome 21 open reading frame 91      | C21orf14, C21orf38, CSSG1, EURL, YG81 |  |
| C21orf94 |                                          |                                       |  |
| C21orf99 |                                          |                                       |  |
| C22orf13 | Chromosome 22 open reading frame 13      |                                       |  |
| C22orf25 |                                          |                                       |  |
| C22orf28 |                                          |                                       |  |
| C22orf29 | Chromosome 22 open reading frame 29      | BOP                                   |  |
| C22orf30 |                                          |                                       |  |
| C22orf39 | Chromosome 22 open reading frame 39      |                                       |  |
| C22orf40 |                                          |                                       |  |
| C22orf46 | Chromosome 22 open reading frame 46      | CTA-216E10.6                          |  |
| C22orf9  | Chromosome 22 open reading frame 9       |                                       |  |
| C2CD2    | C2 calcium-dependent domain containing 2 | C21orf25, C21orf258, TMEM24L          |  |
| C2CD2L   | C2CD2-like                               | DLNB23, TMEM24                        |  |
| C2orf14  | Chromosome 2 open reading frame 14       | DKFZp434F1719                         |  |
| C2orf15  | Chromosome 2 open reading frame 15       |                                       |  |
| C2orf29  |                                          |                                       |  |
| C2orf39  |                                          |                                       |  |
| C2orf42  | Chromosome 2 open reading frame 42       |                                       |  |
| C2orf43  | Chromosome 2 open reading frame 43       |                                       |  |
| C2orf54  | Chromosome 2 open reading frame 54       |                                       |  |
| C2orf55  |                                          |                                       |  |
| C2orf56  |                                          |                                       |  |
| C2orf60  |                                          |                                       |  |
| C2orf68  | Chromosome 2 open reading frame 68       | HCRCN81                               |  |
| C2orf69  | Chromosome 2 open reading frame 69       |                                       |  |
| C2orf71  | Chromosome 2 open reading frame 71       | RP54                                  |  |
| C2orf73  | Chromosome 2 open reading frame 73       |                                       |  |
| C2orf74  | Chromosome 2 open reading frame 74       |                                       |  |

|         |                                                |                     |  |
|---------|------------------------------------------------|---------------------|--|
| C2orf80 | Chromosome 2 open reading frame 80             | GONDA1              |  |
| C2orf83 | Chromosome 2 open reading frame 83             |                     |  |
| C2orf86 |                                                |                     |  |
| C2orf88 | Chromosome 2 open reading frame 88             | smAKAP              |  |
| C2orf89 |                                                |                     |  |
| C2orf90 |                                                |                     |  |
| C3orf1  | Chromosome 3 open reading frame 1              |                     |  |
| C3orf10 |                                                |                     |  |
| C3orf14 | Chromosome 3 open reading frame 14             | HT021               |  |
| C3orf15 |                                                |                     |  |
| C3orf16 |                                                |                     |  |
| C3orf23 |                                                |                     |  |
| C3orf26 |                                                |                     |  |
| C3orf35 | Chromosome 3 open reading frame 35             | APRG1               |  |
| C3orf42 |                                                |                     |  |
| C3orf43 |                                                |                     |  |
| C3orf52 | Chromosome 3 open reading frame 52             | TTMP                |  |
| C3orf55 | Chromosome 3 open reading frame 55             |                     |  |
| C3orf58 | Chromosome 3 open reading frame 58             | DIA1, GoPro49, HASF |  |
| C3orf59 |                                                |                     |  |
| C3orf62 | Chromosome 3 open reading frame 62             |                     |  |
| C3orf64 |                                                |                     |  |
| C3orf65 | Chromosome 3 open reading frame 65             |                     |  |
| C3orf67 | Chromosome 3 open reading frame 67             |                     |  |
| C3orf74 |                                                |                     |  |
| C3P1    | Complement component 3 precursor<br><i>cc3</i> | CPLP                |  |
| C4orf19 | Chromosome 4 open reading frame 19             |                     |  |
| C4orf23 |                                                |                     |  |
| C4orf29 | Chromosome 4 open reading frame 29             |                     |  |
| C4orf3  | Chromosome 4 open reading frame 3              |                     |  |
| C4orf33 | Chromosome 4 open reading frame 33             |                     |  |
| C4orf34 |                                                |                     |  |
| C4orf35 |                                                |                     |  |

|          |                                     |                                 |  |
|----------|-------------------------------------|---------------------------------|--|
| C4orf38  |                                     |                                 |  |
| C4orf40  |                                     |                                 |  |
| C4orf41  |                                     |                                 |  |
| C4orf43  |                                     |                                 |  |
| C5       | Complement component 5              |                                 |  |
| C5AR1    | Complement component 5a receptor 1  | C5A, C5AR, C5R1, CD88           |  |
| C5orf13  |                                     |                                 |  |
| C5orf15  | Chromosome 5 open reading frame 15  | HTGN29, KCT2                    |  |
| C5orf20  |                                     |                                 |  |
| C5orf22  | Chromosome 5 open reading frame 22  |                                 |  |
| C5orf23  | Chromosome 5 open reading frame 23  |                                 |  |
| C5orf28  | Chromosome 5 open reading frame 28  |                                 |  |
| C5orf30  | Chromosome 5 open reading frame 30  |                                 |  |
| C5orf33  |                                     |                                 |  |
| C5orf34  | Chromosome 5 open reading frame 34  |                                 |  |
| C5orf36  |                                     |                                 |  |
| C5orf4   |                                     |                                 |  |
| C5orf41  |                                     |                                 |  |
| C5orf43  |                                     |                                 |  |
| C5orf44  |                                     |                                 |  |
| C5orf46  | Chromosome 5 open reading frame 46  | UNQ472/PRO839, SSSP1            |  |
| C5orf47  | Chromosome 5 open reading frame 47  |                                 |  |
| C5orf51  | Chromosome 5 open reading frame 51  |                                 |  |
| C5orf56  | Chromosome 5 open reading frame 56  |                                 |  |
| C5orf62  |                                     |                                 |  |
| C6orf106 | Chromosome 6 open reading frame 106 | RP3-391O22.4, FP852, dJ391O22.4 |  |
| C6orf114 | Chromosome 6 open reading frame 114 | ADG-90                          |  |
| C6orf115 | Chromosome 6 open reading frame 115 | HSPC280, PRO2013                |  |
| C6orf122 | Chromosome 6 open reading frame 122 | FLJ31451, dJ266L20.5            |  |
| C6orf130 |                                     |                                 |  |
| C6orf132 | Chromosome 6 open reading frame 132 | bA7K24.2                        |  |
| C6orf134 |                                     |                                 |  |
| C6orf141 | Chromosome 6 open reading frame 141 |                                 |  |

|          |                                     |                                        |  |
|----------|-------------------------------------|----------------------------------------|--|
| C6orf142 |                                     |                                        |  |
| C6orf162 |                                     |                                        |  |
| C6orf163 | Chromosome 6 open reading frame 163 |                                        |  |
| C6orf168 |                                     |                                        |  |
| C6orf170 |                                     |                                        |  |
| C6orf174 |                                     |                                        |  |
| C6orf176 |                                     |                                        |  |
| C6orf182 | Chromosome 6 open reading frame 182 | MGC21731, bA487F23.2                   |  |
| C6orf192 |                                     |                                        |  |
| C6orf211 | Chromosome 6 open reading frame 211 |                                        |  |
| C6orf217 | Chromosome 6 open reading frame 217 |                                        |  |
| C6orf223 | Chromosome 6 open reading frame 223 |                                        |  |
| C6orf26  | chromosome 6 open reading frame 26  | NG23                                   |  |
| C6orf35  | Chromosome 6 open reading frame 35  | BM033                                  |  |
| C6orf62  | Chromosome 6 open reading frame 62  | RP1-30M3.4, Nbla00237, XTP12, dJ30M3.2 |  |
| C6orf89  | Chromosome 6 open reading frame 89  | RP1-90K10.6, BRAP                      |  |
| C6orf97  |                                     |                                        |  |
| C7       | Complement component 7              |                                        |  |
| C7orf13  | Chromosome 7 open reading frame 13  | tcag7.556, MY040                       |  |
| C7orf16  |                                     |                                        |  |
| C7orf27  |                                     |                                        |  |
| C7orf28B |                                     |                                        |  |
| C7orf31  | Chromosome 7 open reading frame 31  |                                        |  |
| C7orf41  |                                     |                                        |  |
| C7orf42  |                                     |                                        |  |
| C7orf46  | Chromosome 7 open reading frame 46  |                                        |  |
| C7orf52  |                                     |                                        |  |
| C7orf53  |                                     |                                        |  |
| C7orf54  |                                     |                                        |  |
| C7orf57  | Chromosome 7 open reading frame 57  |                                        |  |
| C7orf58  |                                     |                                        |  |
| C7orf60  | Chromosome 7 open reading frame 60  |                                        |  |
| C7orf63  |                                     |                                        |  |



|          |                                     |                                               |  |
|----------|-------------------------------------|-----------------------------------------------|--|
| C7orf64  |                                     |                                               |  |
| C7orf68  |                                     |                                               |  |
| C7orf71  | Chromosome 7 open reading frame 71  |                                               |  |
| C8orf34  | Chromosome 8 open reading frame 34  | VEST-1, VEST1                                 |  |
| C8orf38  |                                     |                                               |  |
| C8orf41  |                                     |                                               |  |
| C8orf44  | Chromosome 8 open reading frame 44  |                                               |  |
| C8orf59  | Chromosome 8 open reading frame 59  |                                               |  |
| C8orf68  |                                     |                                               |  |
| C8orf76  | Chromosome 8 open reading frame 76  |                                               |  |
| C8orf79  | Chromosome 8 open reading frame 79  |                                               |  |
| C8orf81  |                                     |                                               |  |
| C8orf83  |                                     |                                               |  |
| C8orf84  |                                     |                                               |  |
| C9       | Complement component 9              | ARMD15D, C9                                   |  |
| C9orf100 |                                     |                                               |  |
| C9orf102 | Chromosome 9 open reading frame 102 | RP11-346B7.2, SR278                           |  |
| C9orf109 |                                     |                                               |  |
| C9orf11  |                                     |                                               |  |
| C9orf110 | Chromosome 9 open reading frame 110 |                                               |  |
| C9orf128 |                                     |                                               |  |
| C9orf144 |                                     |                                               |  |
| C9orf167 |                                     |                                               |  |
| C9orf170 | Chromosome 9 open reading frame 170 |                                               |  |
| C9orf21  |                                     |                                               |  |
| C9orf23  |                                     |                                               |  |
| C9orf25  |                                     |                                               |  |
| C9orf3   | Chromosome 9 open reading frame 3   | RP11-80I15.5, AOPEP, AP-O, APO, C90RF3, ONPEP |  |
| C9orf30  |                                     |                                               |  |
| C9orf40  | Chromosome 9 open reading frame 40  |                                               |  |
| C9orf44  |                                     |                                               |  |
| C9orf47  | Chromosome 9 open reading frame 47  | C9orf108, bA791O21.3                          |  |
| C9orf5   |                                     |                                               |  |

|          |                                                         |                                                    |  |
|----------|---------------------------------------------------------|----------------------------------------------------|--|
| C9orf62  | Chromosome 9 open reading frame 62                      | RP11-555H7.1                                       |  |
| C9orf68  |                                                         |                                                    |  |
| C9orf71  |                                                         |                                                    |  |
| C9orf72  | Chromosome 9 open reading frame 72                      | ALSFTD, FTDALS                                     |  |
| C9orf73  | Chromosome 9 open reading frame 73                      |                                                    |  |
| C9orf80  |                                                         |                                                    |  |
| C9orf85  | Chromosome 9 open reading frame 85                      | RP11-346E17.2                                      |  |
| C9orf91  | Chromosome 9 open reading frame 91                      | RP11-402G3.2                                       |  |
| C9orf93  |                                                         |                                                    |  |
| C9orf96  |                                                         |                                                    |  |
| CA10     | Carbonic anhydrase X                                    | hucep-15, CA-RPX, CARPX, HUCEP-15                  |  |
| CA12     | Carbonic anhydrase XII                                  | CAXII, HsT18816                                    |  |
| CA13     | Carbonic anhydrase XIII                                 | CAXIII                                             |  |
| CA3      | Carbonic anhydrase III, muscle specific                 | CAIII, Car3                                        |  |
| CA5B     | Carbonic anhydrase VB, mitochondrial                    | CA-VB                                              |  |
| CA8      | Carbonic anhydrase VIII                                 | CA-VIII, CALS, CAMRQ3, CARP                        |  |
| CA9      | Carbonic anhydrase IX                                   | CAIX, MN                                           |  |
| CAB39    | Calcium binding protein 39                              | CGI-66, MO25                                       |  |
| CAB39L   | Calcium binding protein 39-like                         | RP11-103J18.3, MO25-BETA, MO2L, bA103J18.3         |  |
| CABC1    | Chaperone, ABC1 activity of bc1 complex like (S. pombe) |                                                    |  |
| CABLES1  | Cdk5 and Abl enzyme substrate 1                         | CABL1, CABLES, HsT2563, IK3-1                      |  |
| CABLES2  | Cdk5 and Abl enzyme substrate 2                         | RP5-908M14.2, C20orf150, dJ908M14.2, ik3-2         |  |
| CABYR    | Calcium binding tyrosine-(1)-phosphorylation regulated  | CABYRac, CABYRca, CABYRc, CBF80, CBF8, FSP2, CABYB |  |
| CACHD1   | Cache domain containing 1                               | RP4-655E10.1                                       |  |
| CACNA1B  | Calcium channel, voltage-dependent, N type,             | BIII, CACNL1A5, CACNN, Cav2.2                      |  |
| CACNA1C  | Calcium channel, voltage-dependent, L type,             | CACNL2, CACN2, CACNL1A1, CCHL1A1, Cav1.2,          |  |
| CACNA1E  | Calcium channel, voltage-dependent, K type,             | LOT8, TS                                           |  |
| CACNA2D2 | Calcium channel, voltage-dependent, alpha               | BII, CACH6, CACNL1A6, Cav2.3                       |  |
| CACNA2D3 | Calcium channel, voltage-dependent, alpha               | CACNA2D                                            |  |
| CACNA2D4 | Calcium channel, voltage-dependent, alpha               | HSA272268                                          |  |
| CACNB2   | Calcium channel, voltage-dependent, beta 2              | RCD4                                               |  |
| CACNB4   | Calcium channel, voltage-dependent, beta 4              | RP11-383B4.2, CACNLB2, CAVB2, MYSB                 |  |
| CACYBP   | Calcyclin binding protein                               | RP23-435G20.4, 3110038O15Rik, Cchb4, lh            |  |
|          |                                                         | PNAS-107, GIG5, S100A6BP, SIP                      |  |

|           |                                                           |                                                                                     |   |
|-----------|-----------------------------------------------------------|-------------------------------------------------------------------------------------|---|
| CADM1     | Cell adhesion molecule 1                                  | BEZ, IGSP4, IGSP4A, NECL2, Necl-2, RAI75, ST17, SYNCAM, TSLC1, TSLC1, IGSE, synCAM1 |   |
| CADM2     | Cell adhesion molecule 2                                  | IGSF4D, NECL3, Necl-3, SynCAM 2, synCAM2                                            |   |
| CADM3     | Cell adhesion molecule 3                                  | CTA-154 ZZ.1, DIGK, IGSP4D, NECL1, Necl-1, TSL1, synCAM2                            |   |
| CADPS2    | Ca <sup>++</sup> -dependent secretion activator 2         |                                                                                     |   |
| CALB1     | Calbindin 1, 28 kDa                                       | CALB                                                                                |   |
| CALCA     | Calcitonin-related polypeptide alpha                      | CALC1, CGRP, CGRP-I, CGRP1, CT, KC                                                  |   |
| CALCB     | Calcitonin-related polypeptide beta                       | CALC2, CGRP-II, CGRP2                                                               |   |
| CALCR     | Calcitonin receptor                                       | CRT, CT-R, CTR, CTR1                                                                |   |
| CALCRL    | Calcitonin receptor-like                                  | CGRPR, CRLR                                                                         |   |
| CALD1     | Caldesmon 1                                               | CDM, H-CAD, HCAD, L-CAD, LCAD, NAG22                                                |   |
| CALM1     | Calmodulin 1 (phosphorylase kinase, delta)                | CALML2, CAMI, CPVT4, DD132, PHKD, caM                                               |   |
| CALM2     | Calmodulin 2 (phosphorylase kinase, delta)                | CAMII, PHKD, PHKD2                                                                  |   |
| CALM3     | Calmodulin 3 (phosphorylase kinase, delta)                | HEL-S-72, PHKD, PHKD3                                                               |   |
| CALN1     | Calneuron 1                                               | CABP8                                                                               |   |
| CALR      | Calreticulin                                              | CRT, HEL-S-99n, RO, SSA, cC1qR                                                      | v |
| CALU      | Calumenin                                                 |                                                                                     |   |
| CAMK2D    | Calcium/calmodulin-dependent protein kinase II delta      | CAMKD                                                                               |   |
| CAMK2G    | Calcium/calmodulin-dependent protein kinase II gamma      | RP11-574K11.6, CAMK, CAMK-II, CAMKG                                                 |   |
| CAMK2N1   | Calcium/calmodulin-dependent protein kinase II nuclear 1  | RP11-401M16.1, PRO1489                                                              |   |
| CAMKK1    | Calcium/calmodulin-dependent protein kinase kinase I      | CAMKKA                                                                              |   |
| CAMSAP1   | Calmodulin-regulated spectrin-associated protein 1        | RP11-100C15.2, PRO2405, bA100C15.1                                                  |   |
| CAMSAP1L1 | Calmodulin-regulated spectrin-associated protein 1-like 1 |                                                                                     |   |
| CAMTA1    | Calmodulin binding transcription activator 1              | RP3-467L1.1, CANPMR                                                                 | v |
| CAMTA2    | Calmodulin binding transcription activator 2              |                                                                                     |   |
| CAND1     | Calcium-associated and neddylation-associated 1           | TIP120, TIP120A                                                                     |   |
| CANT1     | Calcium activated nucleotidase 1                          | DBQD, SCAN-1, SCAN1, SHAPY                                                          | v |
| CANX      | Calnexin                                                  | CNX, IP90, P90                                                                      |   |
| CAP1      | CAP, adenylate cyclase-associated protein 1 (cap1)        | RP11-115D7.1, CAP-PEN, CAP1                                                         |   |
| CAPRIN1   | Cell cycle associated protein 1                           | GPIAP1, GPIP137, GRIP137, M11S1, RNG105, p137GPI                                    |   |
| CAPRIN2   | Caprin family member 2                                    | C1QDC1, EEG-1, EEG1, RNG140                                                         |   |
| CAPS2     | Calcyphosine 2                                            | UG0636c06                                                                           |   |
| CAPZA1    | Capping protein (actin filament) muscle Z-disc alpha 1    | CAPPA1, CAPZ, CAZ1                                                                  |   |
| CAPZA2    | Capping protein (actin filament) muscle Z-disc alpha 2    | CAPPA2, CAPZ                                                                        |   |

|          |                                                                   |                                                                     |   |
|----------|-------------------------------------------------------------------|---------------------------------------------------------------------|---|
| CARD10   | Caspase recruitment domain family, member 10                      | RP5-889J22__B.2, BIMP1, CARMA3                                      |   |
| CARD11   | Caspase recruitment domain family, member 11                      | BENTA, BIMP3, CARMA1, IMD11, PPBL                                   | √ |
| CARD14   | Caspase recruitment domain family, member 14                      | BIMP2, CARMA2, PRP, PSORS2, PSS1                                    |   |
| CARD8    | Caspase recruitment domain family, member 8                       | CARDINAL, DACAK, DAKAK, NDFF, NDFF1, TLGAM                          |   |
| CARM1    | Coactivator-associated arginine                                   | PRMT4                                                               |   |
| CASC2    | Cancer susceptibility candidate 2 (non-protein coding)            | C10orf5                                                             |   |
| CASC3    | Cancer susceptibility candidate 3                                 | BTZ, MLN51                                                          |   |
| CASC4    | Cancer susceptibility candidate 4                                 | UNQ2573/PRO6308, H63                                                |   |
| CASC5    | Cancer susceptibility candidate 5                                 | AT13Q14, C129, D40, KNL1, PTTTK33, Spc7, HKNF-1, KSN195             |   |
| CASK     | Calcium/calmodulin-dependent serine protein kinase (MACUK family) | KPT1-340L1.1, CAGH39, CAMGOK, CMG, FGS4, LIN2, MGRGL, MDYSNA, TNRC9 |   |
| CASKIN1  | CASK interacting protein 1                                        | ANKS5A                                                              |   |
| CASP1    | Caspase 1, apoptosis-related cysteine protease                    | ICE, IL1BC, P45                                                     |   |
| CASP10   | Caspase 10, apoptosis-related cysteine protease                   | ALPS2, FLICE2, MCH4                                                 |   |
| CASP2    | Caspase 2, apoptosis-related cysteine protease                    | CASP-2, ICH1, NEDD-2, NEDD2, PPP1R57                                |   |
| CASP4    | Caspase 4, apoptosis-related cysteine protease                    | ICE(rel)II, ICEREL-II, ICH-2, Mih1/TX, TX                           |   |
| CASP7    | Caspase 7, apoptosis-related cysteine protease                    | KPT1-211N1.0, CASP-7, CMIF-1, ICE-LAP3, LICE2, MCH2                 |   |
| CASP8    | Caspase 8, apoptosis-related cysteine protease                    | ALPS2B, CAP4, Casp-8, FLICE, MACH, MCH5                             | √ |
| CASQ2    | Calsequestrin 2 (cardiac muscle)                                  | PDIB2                                                               |   |
| CASR     | Calcium-sensing receptor                                          | CAR, EIG8, FHH, FHH, GPRC2A, HHC, HHC1, HYPOG1, NSHPT, PCAR1        |   |
| CAST     | Calpastatin                                                       | BS-17                                                               |   |
| CAT      | Catalase                                                          |                                                                     |   |
| CATSPER2 | Cation channel, sperm associated 2                                |                                                                     |   |
| CAV1     | Caveolin 1, caveolae protein, 22 kDa                              | BSCL3, CGL3, LCCNS, MSTP085, PPH3, VIP21                            |   |
| CAV2     | Caveolin 2                                                        | CAV                                                                 |   |
| CBFA2T2  | Core-binding factor, runt domain, alpha 2                         | RP5-1137F22.1, EHT, MTGR1, ZMYND3, p85                              |   |
| CBFA2T3  | Core-binding factor, runt domain, alpha 3                         | ETO2, MTG16, MTGR2, ZMYND4                                          | √ |
| CBL      | Cbl proto-oncogene, E3 ubiquitin protein ligase                   | C-CBL2, FRA11B, NSLL, RNF55, CBL                                    | √ |
| CBLB     | Cbl proto-oncogene B, E3 ubiquitin protein ligase                 | Nbla00127, Cbl-b, RNF56                                             | √ |
| CBLL1    | Cbl proto-oncogene-like 1, E3 ubiquitin protein ligase            | HAKAI, RNF188                                                       |   |
| CBLN2    | Cerebellin 2 precursor                                            | UNQ1892/PRO4338                                                     |   |
| CBR1     | Carbonyl reductase 1                                              | CBR, SDR21C1, hCBR1                                                 |   |
| CBR4     | Carbonyl reductase 4                                              | SDR45C1                                                             |   |
| CBWD1    | COBW domain containing 1                                          | RP11-143M1.6, COBP                                                  |   |

|           |                                                             |                                                                  |  |
|-----------|-------------------------------------------------------------|------------------------------------------------------------------|--|
| CBWD2     | COBW domain containing 2                                    |                                                                  |  |
| CBWD3     | COBW domain containing 3                                    | RP11-561O23.4, bA561O23.1                                        |  |
| CBWD5     | COBW domain containing 5                                    | RP11-460E7.3, DC36                                               |  |
| CBWD6     | COBW domain containing 6                                    | BX255923.2                                                       |  |
| CBX4      | Chromobox homolog 4                                         | NBP16, PC2                                                       |  |
| CBX5      | Chromobox homolog 5                                         | HEL25, HP1, HP1A                                                 |  |
| CBX7      | Chromobox homolog 7                                         | RP4-742C19.7                                                     |  |
| CBY1      | Chibby homolog 1 (Drosophila)                               | RP3-508H5.8, CZZ0H2, CB1, HS508H5A, FGEA1, DICEA14, DICEA14-ash1 |  |
| CC2D2A    | Coiled-coil and C2 domain containing 2A                     | JBTS9, MKS6                                                      |  |
| CC2D2B    | Coiled-coil and C2 domain containing 2B                     | RP11-248J23.4, C10orf130, bA248J23.4                             |  |
| CCAR1     | Cell division cycle and apoptosis regulator 1               | RP11-437A18.1                                                    |  |
| CCBL1     | Cysteine conjugate-beta lyase, cytoplasmic                  | RP11-545E17.6, GTK, KAT1, KATI                                   |  |
| CCBP2     |                                                             |                                                                  |  |
| CCDC102A  | Coiled-coil domain containing 102A                          |                                                                  |  |
| CCDC102B  | Coiled-coil domain containing 102B                          | ACY1L, AN, C18orf14, HsT1731                                     |  |
| CCDC103   | Coiled-coil domain containing 103                           | CILD17, PR46b, SMH                                               |  |
| CCDC108   | Coiled-coil domain containing 108                           |                                                                  |  |
| CCDC109A  |                                                             |                                                                  |  |
| CCDC110   | Coiled-coil domain containing 110                           | CT52, KM-HN-1, KMHN1                                             |  |
| CCDC112   | Coiled-coil domain containing 112                           | MBC1                                                             |  |
| CCDC113   | Coiled-coil domain containing 113                           | HSPC065                                                          |  |
| CCDC117   | Coiled-coil domain containing 117                           | CTA-292E10.4, dJ366L4.1                                          |  |
| CCDC122   | Coiled-coil domain containing 122                           | RP11-5G9.1                                                       |  |
| CCDC125   | Coiled-coil domain containing 125                           | KENAE                                                            |  |
| CCDC126   | Coiled-coil domain containing 126                           | 6330407D12Rik, AA675040, AI465320, AL022711                      |  |
| CCDC132   | Coiled-coil domain containing 132                           |                                                                  |  |
| CCDC14    | Coiled-coil domain containing 14                            |                                                                  |  |
| CCDC141   | Coiled-coil domain containing 141                           | CAMDI                                                            |  |
| CCDC144A  | Coiled-coil domain containing 144A                          |                                                                  |  |
| CCDC144B  | Coiled-coil domain containing 144B                          |                                                                  |  |
| CCDC144NL | Coiled-coil domain containing 144 family, non-terminal like |                                                                  |  |
| CCDC148   | Coiled-coil domain containing 148                           |                                                                  |  |
| CCDC149   | Coiled-coil domain containing 149                           |                                                                  |  |

|         |                                   |                                                   |   |
|---------|-----------------------------------|---------------------------------------------------|---|
| CCDC15  | Coiled-coil domain containing 15  |                                                   |   |
| CCDC150 | Coiled-coil domain containing 150 |                                                   |   |
| CCDC152 | Coiled-coil domain containing 152 | Chr5_400, CH5400                                  |   |
| CCDC155 | Coiled-coil domain containing 155 | KASH5                                             |   |
| CCDC17  | Coiled-coil domain containing 17  | RP4-697E16.4                                      |   |
| CCDC25  | Coiled-coil domain containing 25  |                                                   |   |
| CCDC34  | Coiled-coil domain containing 34  | L15, NY-REN-41, RAMA3                             |   |
| CCDC36  | coiled-coil domain containing 36  | CT74                                              |   |
| CCDC41  |                                   |                                                   |   |
| CCDC42  | Coiled-coil domain containing 42  | CCDC42A                                           |   |
| CCDC45  |                                   |                                                   |   |
| CCDC50  | Coiled-coil domain containing 50  | C3orf6, DFNA44, YMER                              |   |
| CCDC51  | Coiled-coil domain containing 51  |                                                   |   |
| CCDC52  |                                   |                                                   |   |
| CCDC6   | Coiled-coil domain containing 6   | D10S170, H4, PTC, TPC, TST1                       | v |
| CCDC60  | Coiled-coil domain containing 60  |                                                   |   |
| CCDC62  | Coiled-coil domain containing 62  | CT109, ERAP75, TSP-NY                             |   |
| CCDC64  | Coiled-coil domain containing 64  | BICDR-1, H_267D11.1                               |   |
| CCDC66  | Coiled-coil domain containing 66  |                                                   |   |
| CCDC67  | Coiled-coil domain containing 67  |                                                   |   |
| CCDC68  | Coiled-coil domain containing 68  | SE57-1                                            |   |
| CCDC7   | Coiled-coil domain containing 7   | RP11-195O1.4, BioT2-A, BioT2-B, BioT2-C, C10orf68 |   |
| CCDC73  | Coiled-coil domain containing 73  | NY-SAR-79                                         | v |
| CCDC75  |                                   |                                                   |   |
| CCDC85A | Coiled-coil domain containing 85A |                                                   |   |
| CCDC88A | Coiled-coil domain containing 88A | APE, GIRDIN, GIV, GRDN, HkRP1, KIAA1212           |   |
| CCDC88C | Coiled-coil domain containing 88C | DAPLE, HKRP2, KIAA1509, SCA40                     |   |
| CCDC9   | Coiled-coil domain containing 9   |                                                   |   |
| CCDC91  | Coiled-coil domain containing 91  | HSD8, p56                                         |   |
| CCDC92  | Coiled-coil domain containing 92  |                                                   |   |
| CCDC93  | Coiled-coil domain containing 93  |                                                   |   |
| CCDC99  |                                   |                                                   |   |
| CCKBR   | Cholecystokinin B receptor        | CCK-B, CCK2R, GASR                                |   |

|         |                                                |                                                                               |   |
|---------|------------------------------------------------|-------------------------------------------------------------------------------|---|
| CCL13   | Chemokine (C-C motif) ligand 13                | CKb10, MCP-4, NCC-1, NCC1, SCYA13, SCYL1                                      |   |
| CCL22   | Chemokine (C-C motif) ligand 22                | A-152E5.1, ABCD-1, DC/D-CK, MDC, SCYA22, STCF-1                               |   |
| CCL25   | Chemokine (C-C motif) ligand 25                | Ckb15, SCYA25, TECK                                                           |   |
| CCL8    | Chemokine (C-C motif) ligand 8                 | HC14, MCP-2, MCP2, SCYA10, SCYA8                                              |   |
| CCNB1   | Cyclin B1                                      | CCNB                                                                          |   |
| CCNDBP1 | Cyclin D-type binding-protein 1                | DIP1, GCIP, HHM                                                               |   |
| CCNE1   | Cyclin E1                                      | CCNE                                                                          | v |
| CCNF    | Cyclin F                                       | FBX1, FBXO1                                                                   |   |
| CCNG1   | Cyclin G1                                      | CCNG                                                                          |   |
| CCNG2   | Cyclin G2                                      |                                                                               |   |
| CCNH    | Cyclin H                                       | CAK, CycH, p34, p37                                                           |   |
| CCNI2   | Cyclin I family, member 2                      |                                                                               |   |
| CCNJ    | Cyclin J                                       | bA690P14.1                                                                    |   |
| CCNK    | Cyclin K                                       | CPR4                                                                          |   |
| CCNL2   | Cyclin L2                                      | NP4-758J18.1, ANIA-0B, CCNM, CCNS, HCLA-150, HLA-150, BCEF, SB128             |   |
| CCNT2   | Cyclin T2                                      | CYCT2                                                                         |   |
| CCR1    | Chemokine (C-C motif) receptor 1               | CD191, CCR-1, CCR1, CMKBR1, HM145, MIP1aX, SCYAP1                             |   |
| CCR2    | Chemokine (C-C motif) receptor 2               | CC-CCR-2, CCR-2A, CCR2B, CD192, CCR2, CCR2A, CCR2B, CMKBR2, MCP-1R, CCR2      |   |
| CCR3    | Chemokine (C-C motif) receptor 3               | CC-CCR-3, CD193, CKR3, CMKBR3                                                 |   |
| CCR6    | Chemokine (C-C motif) receptor 6               | CC-CCR-6, CC-CCR-6, CCR-6, CD196, CCR-6, CCR6, CCR6, CMKBR6, DCR2, DRV6, CCR6 |   |
| CCRN4L  | CCR4 carbon catabolite repression 4-like (c)   | CCR4L, Ccr4c, NOC                                                             |   |
| CCT5    | Cnaperonin containing TCP1, subunit 5 (cnapin) | CCT-epsilon, CTE, HEL-S-69, TCP-1-epsilon                                     |   |
| CCT6P1  | Cnaperonin containing TCP1, subunit 6 (cnapin) | CCT6-5P, CCT6AP1                                                              |   |
| CCT6P3  | Cnaperonin containing TCP1, subunit 6 (cnapin) |                                                                               |   |
| CCT8L2  | Cnaperonin containing TCP1, subunit 8 (cnapin) | CESK1                                                                         |   |
| CD101   | CD101 molecule                                 | RP11-27K13.2, EWI-101, IGSF2, V7                                              |   |
| CD109   | CD109 molecule                                 | RP11-525G3.1, CPAMD7, p180, r150                                              |   |
| CD160   | CD160 molecule                                 | RP11-373C9.1, BY55, NK1, NK28                                                 |   |
| CD163   | CD163 molecule                                 | M130, MM130                                                                   |   |
| CD1C    | CD1c molecule                                  | RP11-101J8.3, BDCA1, CD1, CD1A, R7                                            |   |
| CD1D    | CD1d molecule                                  | CD1A, R3                                                                      |   |
| CD1E    | CD1e molecule                                  | RP11-101J8.5, CD1A, R2                                                        |   |
| CD2     | CD2 molecule                                   | RP4-655N15.2, LFA-2, SRBC, T11                                                |   |

|         |                                                                                |                                                                                                 |   |
|---------|--------------------------------------------------------------------------------|-------------------------------------------------------------------------------------------------|---|
| CD200R1 | CD200 receptor 1                                                               | UNQ2522/PRO0015, CD200R, HCKTR2, MOX2R, OX2R                                                    |   |
| CD24    | CD24 molecule                                                                  | CD24A                                                                                           |   |
| CD247   | CD247 molecule                                                                 | RP11-104E21.1, CD3-ZETA, CD3H, CD3Q, CD3Z, IMD35, T27, TCRZ                                     |   |
| CD274   | CD274 molecule                                                                 | B7-H, B7H1, PD-L1, PDCD1L1, PDCD1LG1, PDL1                                                      | v |
| CD28    | CD28 molecule                                                                  | Tp44                                                                                            |   |
| CD2AP   | CD2-associated protein                                                         | CMS                                                                                             |   |
| CD300LB | CD300 molecule-like family member b                                            | UNQ2550/PRO0029, CD300B, CLM-7, CLM7, CMK155-A2, IDEM 2, IDEM2, TREM 5, TREM5                   |   |
| CD302   | CD302 molecule                                                                 | BIMLEC, CLEC13A, DCL-1, DCL1                                                                    |   |
| CD33    | CD33 molecule                                                                  | SIGLEC-3, SIGLEC3, p67                                                                          |   |
| CD4     | CD4 molecule                                                                   | CD4mut                                                                                          |   |
| CD44    | CD44 molecule (Indian blood group)                                             | AL15550.1, CDW44, CSTG6, ECMK-III, HCELL, HUTCH1, INLUB, MC56, MDU2, MDU2, MICA, P-1            |   |
| CD46    | CD46 molecule, complement regulatory protein                                   | AHUS2, MCP, MIC10, TLX, TRA2.10                                                                 |   |
| CD47    | CD47 molecule                                                                  | IAP, MER6, OA3                                                                                  |   |
| CD48    | CD48 molecule                                                                  | RP11-704F10.5, DCMT, DEAST, DEAST1, MEM-102, SLAMF2, L-CD48, CD48                               |   |
| CD55    | CD55 molecule, decay accelerating factor for complement (C3 and C5 convertase) | RP11-357P18.1, CR, CROM, DAF, TC                                                                |   |
| CD59    | CD59 molecule, complement regulatory protein                                   | 10.5A5, IF5, L510, L550, L552, G544, HKF-20, HKF20, MAQ1B, MAQ2E, MEM43, MIC11, MN11, MN21, MN2 |   |
| CD5L    | CD5 molecule-like                                                              | UNQ205/PRO225, MEM43, AL10, PRO229, SP-ALPHA, Sp-Alpha                                          |   |
| CD6     | CD6 molecule                                                                   | TP120                                                                                           |   |
| CD69    | CD69 molecule                                                                  | AIM, BL-AC/P26, CLEC2C, EA1, GP32/28, MLR-3                                                     |   |
| CD84    | CD84 molecule                                                                  | LY9B, SLAMF5, hCD84, mCD84                                                                      |   |
| CD93    | CD93 molecule                                                                  | CTQT1, CTQT1(F), CTQT1, CDW93, ECSM5, MAXA4, H727E22.1                                          |   |
| CD96    | CD96 molecule                                                                  | TACTILE                                                                                         |   |
| CD99L2  | CD99 molecule-like 2                                                           | UNQ1964/PRO4486, CD99B, MIC2L1                                                                  |   |
| CDADC1  | Cytidine and dCMP deaminase domain containing 1                                | RP11-103J18.2, NYD-SP15, bA103J18.1                                                             |   |
| CDC123  | Cell division cycle 123                                                        | RP11-186N15.4, C10orf7, D123                                                                    |   |
| CDC14A  | Cell division cycle 14A                                                        | cdc14, hCDC14                                                                                   |   |
| CDC14B  | Cell division cycle 14B                                                        | RP11-172F4.15, Cdc14B1, Cdc14B2, hCDC14B, CDC14B                                                |   |
| CDC16   | Cell division cycle 16                                                         | RP11-569D9.4, ANAPC6, APC6, CUT9                                                                |   |
| CDC20B  | Cell division cycle 20B                                                        | G6VTS76519                                                                                      |   |
| CDC23   | Cell division cycle 23                                                         | ANAPC8, APC8, CUT23                                                                             |   |
| CDC25A  | Cell division cycle 25A                                                        | CDC25A2                                                                                         |   |
| CDC26   | Cell division cycle 26                                                         | ANAPC12, APC12, C9orf17                                                                         |   |
| CDC27   | Cell division cycle 27                                                         | ANAPC3, APC3H, DOST450E, DT15978E, IFNUC, UNIC, NUIC, CDC27                                     |   |



|          |                                                        |                                           |   |
|----------|--------------------------------------------------------|-------------------------------------------|---|
| CDC40    | Cell division cycle 40                                 | RP1-71D21.3, EHB3, PRP17, PRPF17          |   |
| CDC42    | Cell division cycle 42                                 | RP1-224A6.5Hs, G25K, CDC42                |   |
| CDC42BPA | CDC42 binding protein kinase alpha (DM1K-111)          | RP5-1087E8.4, MRCK, MRCKA                 |   |
| CDC42BPB | CDC42 binding protein kinase beta (DM1K-111)           | MRCKB                                     |   |
| CDC42SE1 | CDC42 small effector 1                                 | SCIP1, SPEC1                              |   |
| CDC42SE2 | CDC42 small effector 2                                 | SPEC2                                     |   |
| CDC45    | Cell division cycle 45                                 | UNQ374/PRO710L, CDC45L2, PORC-PI-1, CDC45 |   |
| CDC6     | Cell division cycle 6                                  | CDC18L, HsCDC18, HsCDC6                   |   |
| CDC73    | Cell division cycle 73                                 | C1orf28, FIHP, HPTJT, HRPT1, HRPT2, HYX   |   |
| CDCA4    | Cell division cycle associated 4                       | HEPP, SEI-3/HEPP                          |   |
| CDCA5    | Cell division cycle associated 5                       | SORORIN                                   |   |
| CDCP1    | CUB domain containing protein 1                        | UNQ2486/PRO5773, CD318, SIMA135, TRASK    |   |
| CDH1     | Cadherin 1, type 1, E-cadherin (epithelial)            | Arc-1, CD324, CDHE, ECAD, LCAM, UVO       | v |
| CDH13    | Cadherin 13                                            | CDHH, P105                                |   |
| CDH17    | Cadherin 17, LI cadherin (liver-intestine)             | CDH16, HPT-1, HPT1                        |   |
| CDH2     | Cadherin 2, type 1, N-cadherin (neuronal)              | CD325, CDHN, CDw325, NCAD                 |   |
| CDH23    | Cadherin-related 23                                    | RP11-472K8.4, CDHR23, USH1D               |   |
| CDH3     | Cadherin 3, type 1, P-cadherin (placental)             | CDHP, HJMD, PCAD                          |   |
| CDH7     | cadherin 7, type 2                                     | CDH7L1                                    |   |
| CDH8     | Cadherin 2, type 1, N-cadherin (neuronal)              | CD325, CDHN, CDw325, NCAD                 |   |
| CDH9     | Cadherin 9, type 2 (T1-cadherin)                       |                                           |   |
| CDIPT    | CD1-diacylglycerol--inositol 3-phosphatidyltransferase | PIS, PIS1                                 |   |
| CDK1     | Cyclin-dependent kinase 1                              | CDC2, CDC28A, P34CDC2                     |   |
| CDK10    | Cyclin-dependent kinase 10                             | PISSLRE                                   |   |
| CDK14    | Cyclin-dependent kinase 14                             | PFTAIRE1, PFTK1                           |   |
| CDK17    | Cyclin-dependent kinase 17                             | PCTAIRE2, PCTK2                           |   |
| CDK19    | Cyclin-dependent kinase 19                             | RP11-346C16.5, CDC2L6, CDK11, bA346C16.3  |   |
| CDK2AP1  | Cyclin-dependent kinase 2 associated protein 1         | DOC1, DORC1, ST19, doc-1, p12DOC-1        |   |
| CDK3     | Cyclin-dependent kinase 3                              |                                           |   |
| CDK6     | Cyclin-dependent kinase 6                              | PLSTIRE                                   | v |
| CDK8     | Cyclin-dependent kinase 8                              | K35                                       |   |
| CDKL2    | Cyclin-dependent kinase-like 2 (CDC2-related kinase)   | KKIAMRE, P56                              |   |
| CDKL3    | Cyclin-dependent kinase-like 3                         | NKIAMRE                                   |   |

|            |                                                          |                                                                                             |   |
|------------|----------------------------------------------------------|---------------------------------------------------------------------------------------------|---|
| CDKN1B     | Cyclin-dependent kinase inhibitor 1B (p27, <i>Kip1</i> ) | CDKN4, KIP1, MEN1B, MEN4, P27KIP1                                                           |   |
| CDKN2AIP   | CDKN2A interacting protein                               | CARF                                                                                        |   |
| CDKN2AIPNL | CDKN2A interacting protein N-terminal like               |                                                                                             |   |
| CDKN2BAS   |                                                          |                                                                                             |   |
| CDKN2C     | Cyclin-dependent kinase inhibitor 2C (p18, <i>INK4</i> ) | RP11-278J17.2, INK4C, p18, p18-INK4C                                                        | √ |
| CDKN3      | Cyclin-dependent kinase inhibitor 3                      | CDI1, CIP2, KAP, KAP1                                                                       |   |
| CDON       | Cell adhesion associated, oncogene regulated             | CDO1, HPE11, ORCAM, CDON                                                                    |   |
| CDR2       | Cerebellar degeneration-related protein 2, <i>oz</i>     | CDR62, Yo                                                                                   |   |
| CDR2L      | Cerebellar degeneration-related protein 2-like           | HUMPPA                                                                                      |   |
| CDRT4      | CMT1A duplicated region transcript 4                     |                                                                                             |   |
| CDS1       | CDP-diacylglycerol synthase (phosphatidate               | CDS                                                                                         |   |
| CDS2       | CDP-diacylglycerol synthase (phosphatidate               | RP4-680N4.2                                                                                 |   |
| CDV3       |                                                          |                                                                                             |   |
| CDX2       | Caudal type homeobox 2                                   | CDX-3/AS, CDX3, CDX2                                                                        | √ |
| CDY1       | Chromodomain protein, Y-linked, 1                        | CDYA, CDY1                                                                                  |   |
| CDYL       | Chromodomain protein, Y-like                             | CDYL1                                                                                       |   |
| CEACAM1    | Carcinoembryonic antigen-related cell                    | BGP, BGP1, BGPI                                                                             |   |
| CEACAM21   | Carcinoembryonic antigen-related cell                    | UNQ3098/PRO10075, CEACAM3, R29124_1                                                         |   |
| CEACAM3    | Carcinoembryonic antigen-related cell                    | CD66D, CEA, CGM1, W264, W282                                                                |   |
| CEACAM5    | Carcinoembryonic antigen-related cell                    | CD66e, CEA                                                                                  |   |
| CEBPA      | CCAAT/enhancer binding protein (C/EBP),                  | C/EBP-alpha, CEBP                                                                           | √ |
| CEBPG      | CCAAT/enhancer binding protein (C/EBP),                  | GPE1BP, IG/EBP-1                                                                            |   |
| CECR1      | Cat eye syndrome chromosome region,                      | ADA2, ADGF, IDGFL, PAN, SNEDS                                                               |   |
| CECR2      | Cat eye syndrome chromosome region,                      |                                                                                             |   |
| CECR4      | Cat eye syndrome chromosome region,                      |                                                                                             |   |
| CECR6      | Cat eye syndrome chromosome region,                      |                                                                                             |   |
| CECR7      | Cat eye syndrome chromosome region,                      | SAHL1                                                                                       |   |
| CELF1      | CUGBP, Elav-like family member 1                         | BRUNOL2, CUG-BP, CUGBP, CUGBP1, EDEN-BP, NAPI59, NAPI2, BRUNOL3, CUGBP2, ETR-3, ETR3, NAPI3 |   |
| CELF2      | CUGBP, Elav-like family member 2                         |                                                                                             |   |
| CELSR3     | Cadherin, EGF-LAG seven-pass G-type                      | CDHF11, EGFL1, FMI1, HFMI1, MEGF2, RESDA1                                                   |   |
| CENPC1     |                                                          |                                                                                             |   |
| CENPE      | Centromere protein E, 312 kDa                            | CENP-E, KIF10, PPP1R61                                                                      |   |
| CENPI      | Centromere protein I                                     | RP5-1188J21.1, CENP-I, FSHPRH1, LRPR1, Mis6                                                 |   |

|        |                                                         |                                                                                       |   |
|--------|---------------------------------------------------------|---------------------------------------------------------------------------------------|---|
| CENPV  | Centromere protein V                                    | 3110013H01Rik, CENP-V, PRR6, p30                                                      |   |
| CENPW  | Centromere protein W                                    | C6orf173, CENP-W, CUG2                                                                |   |
| CEP110 |                                                         |                                                                                       |   |
| CEP120 | Centrosomal protein 120 kDa                             | CCDC100                                                                               |   |
| CEP135 | Centrosomal protein 135 kDa                             | CEP4, KIAA0635, MCPH8                                                                 |   |
| CEP192 | Centrosomal protein 192 kDa                             | PP8407, PPP1R62                                                                       |   |
| CEP350 | Centrosomal protein 350 kDa                             | RP11-502H18.1, CAP350, GM133                                                          |   |
| CEP55  | Centrosomal protein 55 kDa                              | RP11-30E16.2, C10orf3, CT111, URCC6                                                   |   |
| CEP57  | Centrosomal protein 57 kDa                              | MVA2, PIG8, TSP57                                                                     |   |
| CEP63  | Centrosomal protein 63 kDa                              | SCKL6                                                                                 |   |
| CEP68  | Centrosomal protein 68 kDa                              | KIAA0582                                                                              |   |
| CEP72  | Centrosomal protein 72 kDa                              |                                                                                       |   |
| CEP78  | Centrosomal protein 78 kDa                              | RP11-336N8.5, C9orf81, IP63                                                           |   |
| CEPT1  | Choline/ethanolamine phosphotransferase 1               | PRO1101                                                                               |   |
| CER1   | Cerberus 1, DAN family BMP antagonist                   | DAND4                                                                                 |   |
| CES2   | Carboxylesterase 2                                      | CE-2A1, PCE-2, iCE, CES2                                                              |   |
| CES7   |                                                         |                                                                                       |   |
| CETN3  | Centrin, EF-hand protein, 3                             | CDC31, CEN3                                                                           |   |
| CFL1   | Cofilin 1 (non-muscle)                                  | CFL, HEL-S-15                                                                         |   |
| CFL2   | Cofilin 2 (muscle)                                      | NEM7                                                                                  |   |
| CFLAR  | CASP8 and FADD-like apoptosis regulator                 | CASP8, CASP8A1, CLARP, Caspel, FLAME, FLAME-1, FLAME1, FLIP, FLICE, MDR1, FLIP, FLIP2 |   |
| CFLP1  | Cofilin 1 (non-muscle) pseudogene 1                     |                                                                                       |   |
| CFP    | Complement factor properdin                             | BFD, PFC, PFD, PROPERDIN                                                              |   |
| CGGBP1 | CGG triplet repeat binding protein 1                    | CGGBP, p20-CGGBP                                                                      |   |
| CGN    | Cingulin                                                | RP11-74C1.3                                                                           |   |
| CGNL1  | Cingulin-like 1                                         | JACOP                                                                                 |   |
| CGRRF1 | Cell growth regulator with ring finger domain 1         | CGR19, RNF197                                                                         |   |
| CH25H  | Cholesterol 25-hydroxylase                              | C25H                                                                                  |   |
| CHAT   | Choline O-acetyltransferase                             | CHOACTASE, CMS1A, CMS1A2                                                              |   |
| CHCHD1 | Coiled-coil-helix-coiled-coil-helix domain containing 1 | C10orf34, C2360, MRP-S37                                                              |   |
| CHCHD5 | Coiled-coil-helix-coiled-coil-helix domain containing 5 | C2orf9, MIC14                                                                         |   |
| CHCHD7 | Coiled-coil-helix-coiled-coil-helix domain containing 7 | COX23                                                                                 | v |
| CHCHD8 |                                                         |                                                                                       |   |

|         |                                                         |                                                                 |   |
|---------|---------------------------------------------------------|-----------------------------------------------------------------|---|
| CHD1    | Chromodomain helicase DNA binding                       |                                                                 |   |
| CHD2    | Chromodomain helicase DNA binding                       | EEOC                                                            |   |
| CHD3    | Chromodomain helicase DNA binding                       | Mi-2a, Mi2-ALPHA, ZFH                                           |   |
| CHD5    | Chromodomain helicase DNA binding                       | RP1-233K16.2, CHD-5                                             |   |
| CHD6    | Chromodomain helicase DNA binding                       | RP4-620E11.2, CHD-6, CHD5, RIGB                                 |   |
| CHD7    | Chromodomain helicase DNA binding                       | CRG, HH5, IS3, KAL5                                             |   |
| CHD9    | Chromodomain helicase DNA binding                       | AD-013, AD013, CReMM, KISH2, PRIC320                            |   |
| CHERP   | Calcium homeostasis endoplasmic reticulum               | DAN16, SCAF6, SRA1                                              |   |
| CHGA    | Chromogranin A (paraneuronal secretory protein 1)       | CGA                                                             |   |
| CHIC1   | Cysteine-rich hydrophobic domain 1                      | RP11-108A15.1, BRX                                              |   |
| CHKA    | Choline kinase alpha                                    | CHK, CK, CKI, EK                                                |   |
| CHL1    | Cell adhesion molecule L1-like                          | CALL, L1CAM2                                                    |   |
| CHM     | Choroideremia (Rab escort protein 1)                    | RP1-93L7.1, DXS540, GGTA, HSD-32, REP-1, TCD                    |   |
| CHML    | Choroideremia-like (Rab escort protein 2)               | REP2                                                            |   |
| CHMP1B  | Charged multivesicular body protein 1B                  | C16orf12, C16-ORF2, C16orf12, CHMP1.5, vps40-2, Vps46B, Vps46.2 |   |
| CHMP2B  | Charged multivesicular body protein 2B                  | CGI-84, ALS17, CHMP2.5, DMT1, VPS2-2, VPS2B                     |   |
| CHMP4C  | Charged multivesicular body protein 4C                  | SNF7-3, Shax3, VPS32C                                           |   |
| CHMP7   | Charged multivesicular body protein 7                   |                                                                 |   |
| CHN1    | Chimerin 1                                              | ARHGAP2, CHN, DURS2, NC, RHOGAP2                                | v |
| CHN2    | Chimerin 2                                              | tcag7.1311, ARHGAP3, BCH-3, RHOGAP3, CHN2                       |   |
| CHORDC1 | Cysteine and histidine-rich domain (CHORD) containing 1 | CHP1                                                            |   |
| CHP     |                                                         |                                                                 |   |
| CHPT1   | Choline phosphotransferase 1                            | MSTP022, CPT, CPT1                                              |   |
| CHRDL1  | Chordin-like 1                                          | RP6-141H5.1, CHL, MOC1, MOCN, NIKEN1, VOP1, LA141H5.1           |   |
| CHRM2   | Cholinergic receptor, muscarinic 2                      | HM2                                                             |   |
| CHRM5   | Cholinergic receptor, muscarinic 5                      | HM5                                                             |   |
| CHRNA1  | Cholinergic receptor, nicotinic, alpha 1                | ACHRA, ACHRD, CHRNA, CMS2A, FCCMS, SCCMS                        |   |
| CHRNA3  | Cholinergic receptor, nicotinic, alpha 3                | LNCR2, NACHRA3, PAOD2                                           |   |
| CHRNA7  | Cholinergic receptor, nicotinic, alpha 7                | CHRNA7-2, NACHRA7                                               |   |
| CHRNA9  | Cholinergic receptor, nicotinic, alpha 9                | HSA243342, NACHRA9                                              |   |
| CHRNB2  | Cholinergic receptor, nicotinic, beta 2                 | RP11-61L14.4, EFNL3, nAChRB2                                    |   |
| CHRNE   | Cholinergic receptor, nicotinic, epsilon                | ACHRE, CMS1D, CMS1E, CMS2A, FCCMS, SCCMS                        |   |
| CHST11  | Carbohydrate (chondroitin 4-) sulfotransferase 11       | C4ST, C4ST-1, C4ST1, HSA269537                                  |   |

|        |                                                                                  |                                                                     |  |
|--------|----------------------------------------------------------------------------------|---------------------------------------------------------------------|--|
| CHST3  | Carbohydrate (chondroitin 6-)                                                    | C6ST, C6ST1, HSD                                                    |  |
| CHST6  | Carbohydrate (N2-acetylglucosamine 6-O)                                          | MCDC1                                                               |  |
| CHST9  | Carbohydrate (N6-acetylglucosamine 4-O) sulfotransferase 9                       | UNQ2549/PRO6175, GALNAC4ST-2                                        |  |
| CHSY3  | Chondroitin sulfate synthase 3                                                   | CHSY2, CSS3                                                         |  |
| CTF8   | CTF8, chromosome transmission fidelity factor 8 homolog (S. pombe)               | CTF8, DERP                                                          |  |
| CHURC1 | Churchill domain containing 1                                                    | My015, C14orf52, chch                                               |  |
| CIAO1  | Cytosolic iron-sulfur assembly component 1                                       | CIA1, WDR39                                                         |  |
| CIDEA  | Cell death-inducing DFFA-like effector a                                         | CIDE-A                                                              |  |
| CIRBP  | Cold inducible RNA binding protein                                               | CIRP                                                                |  |
| CIRH1A | Cirrhosis, autosomal recessive 1A (cirhin)                                       | CIRHIN, NAIC, TEX292, UTP4                                          |  |
| CISD1  | CDGSH iron sulfur domain 1                                                       | MDS029, C10orf70, ZCD1, mitoNEET                                    |  |
| CISH   | Cytokine inducible SH2-containing protein                                        | BACTS2, CIS, CIS-1, G18, SOCS                                       |  |
| CIT    | Citronin-interacting serine/threonine                                            | CRIK, STK21                                                         |  |
| CITED2 | Copp3500-interacting transactivator, with Glu/Asp-rich carboxy-terminal domain 2 | ASD8, MRG-1, MRG1, P35SRJ, VSD2                                     |  |
| CKAP2  | Cytoskeleton associated protein 2                                                | LB1, TMAP, se20-10                                                  |  |
| CKAP4  | Cytoskeleton associated protein 4                                                | CLIMP-63, ERGIC-63, p63                                             |  |
| CKLF   | Chemokine-like factor                                                            | HSPC224, CS21, CKLF2, CKLF3, CKLF4, CCK-1, CKLF                     |  |
| CKMT1B | Creatine kinase, mitochondrial 1B                                                | CKMT, CKMT1, UMTCK                                                  |  |
| CKS1B  | CDC28 protein kinase regulatory subunit 1B                                       | RP11-307C12.6, CKS1, PNAS-16, PNAS-18, ckshs1                       |  |
| CLASP1 | Cytoplasmic linker associated protein 1                                          | MAST1                                                               |  |
| CLASP2 | Cytoplasmic linker associated protein 2                                          |                                                                     |  |
| CLCA3P | Chloride channel accessory 3, pseudogene                                         | CLCA3                                                               |  |
| CLCC1  | Chloride channel CLIC-like 1                                                     | RP11-475E11.6, MCLC                                                 |  |
| CLCN2  | Chloride channel, voltage-sensitive 2                                            | CLC-2, CLC2, ECA2, ECA3, EGIT1, EGIS, EOMA, FIM6, FIM8, LKBPAT, JG2 |  |
| CLCN4  | Chloride channel, voltage-sensitive 4                                            | CLC4, CLC-4, CLC-4A                                                 |  |
| CLCN5  | Chloride channel, voltage-sensitive 5                                            | CLC5, CLCK2, CLC-5, DENT5, NFHL1, NFHL2, ALNH, XPN, hCLC K2         |  |
| CLCN6  | Chloride channel, voltage-sensitive 6                                            | RP5-934G17.1, CLC-6                                                 |  |
| CLDN10 | Claudin 10                                                                       | RP11-23E3.4, CPETRL3, OSP-L                                         |  |
| CLDN12 | Claudin 12                                                                       |                                                                     |  |
| CLDN18 | Claudin 18                                                                       | UNQ778/PRO1572, SFTA5, SFTPJ                                        |  |
| CLDN19 | Claudin 19                                                                       | HOMG5                                                               |  |
| CLDN20 | Claudin 20                                                                       |                                                                     |  |
| CLDN4  | Caudin 4                                                                         | CPE-R, CPER, CPETR, CPETR1, WBSR8, hCPE-R                           |  |

|         |                                                                                   |                                                                          |   |
|---------|-----------------------------------------------------------------------------------|--------------------------------------------------------------------------|---|
| CLDN8   | Caudin 8                                                                          | UNQ779/PRO1573                                                           |   |
| CLDND1  | Claudin domain containing 1                                                       | HSPC174, C3orf4, GENX-3745                                               |   |
| CLEC12A | C-type lectin domain family 12, member A                                          | CLL-1, CLL1, DCAL-2, M1CL                                                |   |
| CLEC16A | C-type lectin domain family 16, member A                                          | Gop-1, KIAA0350                                                          |   |
| CLEC17A | C-type lectin domain family 17, member A                                          |                                                                          |   |
| CLEC18B | C-type lectin domain family 18, member B                                          | UNQ306/PRO347, MRCL2                                                     |   |
| CLEC1B  | C-type lectin domain family 1, member B                                           | UNQ721/PRO1384, T61000H15NIK, CLEC2, CLEC2B, PRO1284, QDEF721            |   |
| CLEC2D  | C-type lectin domain family 2, member D                                           | CLAX, LLT1, OCIL                                                         |   |
| CLEC3A  | C-type lectin domain family 3, member A                                           | UNQ700/PRO1345, CLECSF1                                                  |   |
| CLEC4D  | C-type lectin domain family 4, member D                                           | CLEC-6, CLEC6, CLECSF8, MCL, MPCL                                        |   |
| CLECL1  | C-type lectin-like 1                                                              | DCAL-1, DCAL1                                                            |   |
| CLIC2   | Chloride intracellular channel 2                                                  | RP13-228J13.7b, MRXS32, XAP121, CLIC2                                    |   |
| CLIC6   | Chloride intracellular channel 6                                                  | CLIC1L                                                                   |   |
| CLINT1  | Clathrin interactor 1                                                             | CLINT, ENTH, EPN4, EPNR                                                  |   |
| CLIP1   | CAR-GLT domain containing linker protein 1                                        | CLIP, CLIP-17070, CYLN1, RSN, CLIP1                                      |   |
| CLK1    | CDC-like kinase 1                                                                 | CLK, CLK/STY, STY                                                        |   |
| CLK4    | CDC-like kinase 4                                                                 |                                                                          |   |
| CLUU1   | Chronic lymphocytic leukemia up-regulated 1                                       |                                                                          |   |
| CLUU10S | Chronic lymphocytic leukemia up-regulated 1, opposite strand                      |                                                                          |   |
| CLMN    | Calmin (calponin-like, transmembrane)                                             |                                                                          |   |
| CLN8    | Ceroid lipofuscinosis, neuronal 8 (epilepsy, progressive with mental retardation) | C8orf61, EPMR                                                            |   |
| CLOCK   | Clock circadian regulator                                                         | KAT13D, bHLHe8                                                           |   |
| CLRN10S |                                                                                   |                                                                          |   |
| CLSTN1  | Calsyntenin 1                                                                     | RP11-558F24.3, ALC-ALPHA, CDHR12, CSTN1, PK2CD, XP214446, 444444, 444444 |   |
| CLSTN2  | Calsyntenin 2                                                                     | ALC-GAMMA, CDHR13, CS2, CSTN2, alcagamma                                 |   |
| CLTA    | Clathrin, light chain A                                                           | LCA                                                                      |   |
| CLTC    | Clathrin, heavy chain (Hc)                                                        | CHC, CHC17, CLH-17L2, Hc, CLTC                                           | √ |
| CLUAP1  | Clusterin associated protein 1                                                    | CFAP22, FAP22                                                            |   |
| CLUL1   | Clusterin-like 1 (retinal)                                                        | RA337M                                                                   |   |
| CLVS1   | Clavesin 1                                                                        | CRALBPL, RLBPL1                                                          |   |
| CMAH    |                                                                                   |                                                                          |   |
| CMAS    | Cytidine monophosphate N-acetylneuraminic acid synthase                           | CSS                                                                      |   |
| CMPK1   | Cytidine monophosphate (UMP-CMP) kinase 1, testis                                 | RP11-511Z1.1, C1X, CMK, CMPK, UMPK, UMP-CMPK, UMPK                       |   |

|         |                                                            |                                                                                             |  |
|---------|------------------------------------------------------------|---------------------------------------------------------------------------------------------|--|
| CMPK2   | Cytidine monophosphate (UMP-CMP)                           | TMPK2, TYKi, UMP-CMPK2                                                                      |  |
| CMTM1   | CKLF-like motif 1 LL transmembrane protein                 | CKLFH, CKLFH1, CKLFSF1                                                                      |  |
| CMTM4   | CKLF-like motif 4 LL transmembrane protein                 | CKLFSF4                                                                                     |  |
| CMTM6   | CKLF-like motif 6 LL transmembrane protein                 | CKLFSF6, PRO2219                                                                            |  |
| CMTM8   | CKLF-like motif 8 LL transmembrane protein                 | CKLFSF8, CKLFSF8-V2                                                                         |  |
| CNBP    | Ccr4-type zinc finger, nucleic acid binding                | CNBP1, DM2, PROMM, RNF163, ZCCHC22, ZNF9                                                    |  |
| CNDP1   | Carnosine dipeptidase 1 (metallopeptidase M10 family)      | UNQ1915/PRO4380, CN1, CPGL2, HsT2308                                                        |  |
| CNGB1   | Cyclic nucleotide gated channel beta 1                     | CNGB2, CNGB3L, CNGB4, CNGB5, GAK1, GAK1 , GAK2, RCNGB2, RCNGB3, RCNGB4, RCNGB5, PD45, CNGB1 |  |
| CNIH3   | Connexin family A1M1 A receptor auxiliary protein 3        | RP11-3L21.1, CNIH-3                                                                         |  |
| CNIH4   | Connexin family A1M1 A receptor auxiliary protein 4        | HSPC163, CNIH-4                                                                             |  |
| CNKSR3  | CNKSR family member 3                                      | RP11-486M3.1, MAG11                                                                         |  |
| CNNM1   | Cylin and CBS domain trivalent metal ion binding protein 1 | ACDP1, CLP-1                                                                                |  |
| CNNM2   | Cylin and CBS domain trivalent metal ion binding protein 2 | RP11-30H12.1, ACDP2                                                                         |  |
| CNNM3   | Cylin and CBS domain trivalent metal ion binding protein 3 | ACDP3                                                                                       |  |
| CNO     |                                                            |                                                                                             |  |
| CNOT1   | CCR4-NOT transcription complex, subunit 1                  | AD-005, CDC39, NOT1, NOT1H                                                                  |  |
| CNOT10  | CCR4-NOT transcription complex, subunit 10                 |                                                                                             |  |
| CNOT2   | CCR4-NOT transcription complex, subunit 2                  | HSPC131, CDC36, NOT2, NOT2H                                                                 |  |
| CNOT4   | CCR4-NOT transcription complex, subunit 4                  | CLONE243, NOT4, NOT4H                                                                       |  |
| CNOT6   | CCR4-NOT transcription complex, subunit 6                  | CCR4, Ccr4a                                                                                 |  |
| CNOT6L  | CCR4-NOT transcription complex, subunit 6-like             | CCR4b                                                                                       |  |
| CNOT8   | CCR4-NOT transcription complex, subunit 8                  | CAF1, CALIF, Caf1b, POP2, hCAF1                                                             |  |
| CNP     | 2',3'-cyclic nucleotide 3' phosphodiesterase               | CNP1                                                                                        |  |
| CNPY1   | canopy FGF signaling regulator 1                           | tcag7.570                                                                                   |  |
| CNR1    | Cannabinoid receptor 1 (brain)                             | RP11-25D17.1, CANN0, CB-R, CB1, CB1A, CB1B, CB1C, CB1D, CNR1                                |  |
| CNST    | Consortin, connexin sorting protein                        | RP11-452J6.1, C1orf71, PPP1R64                                                              |  |
| CNTLN   | Centlein, centrosomal protein                              | RP11-163F8.4, C9orf101, C9orf39, bA340N12.1                                                 |  |
| CNTN1   | Contactin 1                                                | F3, GP135, MYPCN                                                                            |  |
| CNTN2   | Contactin 2 (axonal)                                       | AXT, FAME5, TAG-1, TAX, TAX1                                                                |  |
| CNTN3   | Contactin 3 (plasmacytoma associated)                      | BIG-1, PANG, PCS                                                                            |  |
| CNTN4   | Contactin 4                                                | AXCAM, BIG-2                                                                                |  |
| CNTN5   | Contactin 5                                                | HNB-2s, NB-2                                                                                |  |
| CNTNAP1 | Contactin associated protein 1                             | CASPR, CNTNAP, NRXN4, P190                                                                  |  |

|          |                                                                        |                                                       |  |
|----------|------------------------------------------------------------------------|-------------------------------------------------------|--|
| CNTNAP2  | Contactin associated protein-like 2                                    | AUTS15, CASPR2, CDFE, NRXN4, PTHSL1                   |  |
| CNTNAP3  | Contactin associated protein-like 3                                    | RP11-138L21.1, CASPR3A, CNTNAP3                       |  |
| CNTNAP3B | Contactin associated protein-like 3B                                   | AL353791.1                                            |  |
| CNTNAP3B | Contactin associated protein-like 3B                                   | AL353791.1                                            |  |
| CNTNAP4  | Contactin associated protein-like 4                                    | CASPR4                                                |  |
| COASY    | CoA synthase                                                           | PSEC0106, DPCK, NBIA6, NBP, PPAT, UKR1, pOV-2         |  |
| COBL     | Cordon-bleu WH2 repeat protein                                         |                                                       |  |
| COG3     | Component of oligomeric golgi complex 3                                | SEC34                                                 |  |
| COG5     | Component of oligomeric golgi complex 5                                | CDG2I, GOLTC1, GTC90                                  |  |
| COG6     | Component of oligomeric golgi complex 6                                | RP11-304M3.3, CDG2L, COD2, SHNS                       |  |
| COIL     | Coilin                                                                 | CLN80, p80-coilin                                     |  |
| COL10A1  | Collagen, type X, alpha 1                                              | RP1-136O14.2                                          |  |
| COL16A1  | Collagen, type XVI, alpha 1                                            | FP1572, 447AA                                         |  |
| COL17A1  | Collagen, type XVII, alpha 1                                           | RP11-101H25.2, BAF10H25.2, BAF180, BFAF2, BFAO2, LAD1 |  |
| COL19A1  | Collagen, type XIX, alpha 1                                            | RP1-138F4.1, COL9A1L, D6S228E                         |  |
| COL1A2   | Collagen, type I, alpha 2                                              | OI4                                                   |  |
| COL21A1  | Collagen, type XXI, alpha 1                                            | FP633, COLA1L, dJ682J15.1, dJ708F5.1                  |  |
| COL22A1  | Collagen, type XXII, alpha 1                                           |                                                       |  |
| COL29A1  |                                                                        |                                                       |  |
| COL3A1   | Collagen, type III, alpha 1                                            | EDS4A                                                 |  |
| COL4A1   | Collagen, type IV, alpha 1                                             | RP11-472K17.2, HANAC, ICH, POREN1, arresten           |  |
| COL4A3BP | Collagen, type IV, alpha 3 (Goodpasture antigen) binding protein       | CERT, CERTL, GPBP, STARD11                            |  |
| COL4A4   | Collagen, type IV, alpha 4                                             | CA44                                                  |  |
| COL4A5   | Collagen, type IV, alpha 5                                             | RP6-24A23.5, ASLN, ATS, CA54                          |  |
| COL5A1   | Collagen, type V, alpha 1                                              | RP11-263F14.1                                         |  |
| COL5A2   | Collagen, type V, alpha 2                                              |                                                       |  |
| COL6A3   | Collagen, type VI, alpha 3                                             |                                                       |  |
| COL6A4P2 | Collagen, type VI, alpha 4 pseudogene 2                                | COL6A4                                                |  |
| COLQ     | Collagen-like tail subunit (single strand or homotrimer) of asymmetric | EAD                                                   |  |
| COMMD2   | COMM domain containing 2                                               | HSPC042                                               |  |
| COMMD6   | COMM domain containing 6                                               | RP11-173B14.2, Acrg                                   |  |
| COMMD8   | COMM domain containing 8                                               | MDS022                                                |  |
| COMT     | Catechol-O-methyltransferase                                           | HEL-S-98n                                             |  |



|         |                                                                      |                                      |  |
|---------|----------------------------------------------------------------------|--------------------------------------|--|
| COPA    | Coatomer protein complex, subunit alpha                              | HEP-COP                              |  |
| COPS2   | COP9 signalosome subunit 2                                           | ALIEN, CSN2, SGN2, TRIP15            |  |
| COQ10B  | Coenzyme Q10 homolog B ( <i>S. cerevisiae</i> )                      |                                      |  |
| COQ2    | Coenzyme Q2 4-hydroxybenzoate<br>polymethyltransferase               | CL640, COQ10D1, MSA1                 |  |
| COQ6    | Coenzyme Q6 monooxygenase                                            | CGI-10, CGI10, COQ10D6               |  |
| COQ7    | Coenzyme Q7 homolog, ubiquinone (yeast)                              | CAT5, CLK-1, CLK1                    |  |
| COQ9    | Coenzyme Q9                                                          | HSPC326, C16orf49, COQ10D5           |  |
| CORIN   | Corin, serine peptidase                                              | ATC2, CRN, Lrp4, PEE5, TMPRSS10      |  |
| CORO1B  | Coronin, actin binding protein, 1B                                   | CORONIN-2                            |  |
| CORO1C  | Coronin, actin binding protein, 1C                                   | HCRNN4                               |  |
| COX10   | Cytochrome c oxidase assembly homolog 10                             |                                      |  |
| COX11   | Cytochrome c oxidase assembly homolog 11                             | COX11P                               |  |
| COX15   | Cytochrome c oxidase assembly homolog 15                             | CEMCOX2                              |  |
| COX17   | COX17 cytochrome c oxidase copper                                    |                                      |  |
| COX19   | Cytochrome c oxidase assembly homolog 19<br>( <i>S. cerevisiae</i> ) |                                      |  |
| COX4I1  | Cytochrome c oxidase subunit IV isoform 1                            | COX4, COX4-1, COXIV                  |  |
| COX4NB  |                                                                      |                                      |  |
| COX6B2  | Cytochrome c oxidase subunit v10                                     | COXVIB2, CT59                        |  |
| COX7A2L | Cytochrome c oxidase subunit v1a<br>carboxypeptidase 2 like          | COX7AR, COX7RP, EB1, SIG81           |  |
| CP      | Ceruloplasmin (ferroxidase)                                          | CP-2                                 |  |
| CP110   |                                                                      |                                      |  |
| CPA2    | Carboxypeptidase A2 (pancreatic)                                     |                                      |  |
| CPA6    | Carboxypeptidase A6                                                  | CPAH, ETL5, FEB11                    |  |
| CPB2    | Carboxypeptidase B2 (plasma)                                         | CPU, PCPB, TAFI                      |  |
| CPD     | Carboxypeptidase D                                                   | GP180                                |  |
| CPE     | Carboxypeptidase E                                                   |                                      |  |
| CPEB1   | Cytosplasmic polyadenylation element                                 | CEBP, CPE-BP1, CPEB, CPEB-1, hCPEB-1 |  |
| CPEB2   | Cytosplasmic polyadenylation element                                 | CPE-BP2, CPEB-2, hCPEB-2             |  |
| CPEB4   | Cytosplasmic polyadenylation element<br>binding protein 4            |                                      |  |
| CPLX2   | Complexin 2                                                          | 921-L, CPX-2, CPX2, Hfb1             |  |
| CPM     | Carboxypeptidase M                                                   |                                      |  |
| CPNE2   | Copine II                                                            | COPN2, CPN2                          |  |
| CPNE4   | Copine IV                                                            | COPN4, CPN4                          |  |

|          |                                                           |                                                   |   |
|----------|-----------------------------------------------------------|---------------------------------------------------|---|
| CPOX     | Coproporphyrinogen oxidase                                | CPO, CPX, HCP                                     |   |
| CPPED1   | Calcineurin-like phosphoesterase domain containing        | CSTP1                                             |   |
| CPSF6    | Cleavage and polyadenylation specific factor 6 (CPSF6)    | CFIM, CFIM68, HPBR11-4, HPBR11-7                  |   |
| CPT1A    | Carnitine palmitoyltransferase 1A (liver)                 | CPT1, CPT1-L, L-CPT1                              |   |
| CPT1B    | Carnitine palmitoyltransferase 1B (muscle)                | CPT1-M, CPT1M, CPT1, CPT1M, M-CPT1, MCCPT1, MCPT1 |   |
| CRADD    | CASP2 and K11/K1 domain containing                        | MRT34, RAIDD                                      |   |
| CRB1     | Crumbs family member 1; photoreceptor membrane associated | RP11-53124.1, LCA8, RP12                          |   |
| CREB1    | CAMP responsive element binding protein 1                 | CREB                                              | v |
| CREB3    | CAMP responsive element binding protein 3                 | LUMAN, LZIP                                       |   |
| CREB3L2  | CAMP responsive element binding protein 3-like 2          | BBF2H7                                            | v |
| CREB5    | cAMP responsive element binding protein 5                 | CRE-BPA                                           |   |
| CREBBP   | CREB binding protein                                      | CBP, KAT3A, RSTS                                  | v |
| CREBL2   | CAMP responsive element binding protein-like 2            |                                                   |   |
| CREBZF   | CREB/ATF bZIP transcription factor                        | SMILE, ZF                                         |   |
| CREG2    | Cellular repressor of E1A-stimulated genes 2              |                                                   |   |
| CREM     | CAMP responsive element modulator                         | RP11-324122.1-2, ICER, hCREM-2, CREM              |   |
| CRH      | Corticotropin releasing hormone                           | CRF                                               |   |
| CRHBP    | Corticotropin releasing hormone binding                   | CRF-BP, CRFBP                                     |   |
| CRIM1    | Cysteine rich transmembrane BMP regulator 1               | UNQ1886/PRO4330, CRIM-1, S52                      |   |
| CRISPLD1 | Cysteine rich secretory protein LCCL                      | UNQ342/PRO541, CRISP-10, CRISP10, LCRISP1         |   |
| CRK      | v-crk avian sarcoma virus C110 oncogene homolog like      | CRKII, p38                                        |   |
| CRKL     | v-crk avian sarcoma virus C110 oncogene homolog like      |                                                   |   |
| CRLF3    | Cytokine receptor-like factor 3                           | CREME-9, CREME9, CRLM9, CYTOR4, FRWS, p48.2       | v |
| CRLS1    | Cardiolipin synthase 1                                    | C20orf155, CLS, CLS1, GCD10, dJ967N21.6           |   |
| CRNKL1   | Crooked neck pre-mRNA splicing factor 1                   | RP3-1002M6.1, CEF, CRN, CRI, HCRN, MST1021, CRY2  |   |
| CROT     | Carnitine O-octanoyltransferase                           | COT                                               |   |
| CRTAP    | Cartilage associated protein                              | CASP, LEPREL3, OI7                                |   |
| CRTC3    | CREB regulated transcription coactivator 3                | TORC-3, TORC3                                     |   |
| CRX      | Cone-rod homeobox                                         | CORD2, CRD, LCA7, OTX3                            |   |
| CRY2     | Cryptochrome circadian clock 2                            | HCRY2, PHL2                                       |   |
| CRYBG3   | Beta-gamma crystallin domain containing 3                 | DKFZp667G2110                                     |   |
| CRYGN    | Crystallin, gamma N                                       |                                                   |   |
| CSDA     |                                                           |                                                   |   |

|            |                                                       |                                                   |   |
|------------|-------------------------------------------------------|---------------------------------------------------|---|
| CSDAP1     | Cold shock domain protein A pseudogene 1              |                                                   |   |
| CSDE1      | Cold shock domain containing ET, RNA-binding          | RP5-1000E10.3, D1S155E, UNR                       |   |
| CSF1       | Colony stimulating factor 1 (macrophage)              | RP11-195M16.2, CSF-1, MCSF                        |   |
| CSF2RA     | Colony stimulating factor 2 receptor, alpha,          | CD110, CDW110, CSF2RA, CSF2RA1, CSF2RA,           |   |
| CSF2RB     | Colony stimulating factor 2 receptor, beta,           | CSF2RB, CM, CSF2B1, CDW111, CMCSF2B, IE3RB, SMDP4 |   |
| CSGALNACT1 | Chondroitin sulfate N-acetylglucosaminyltransferase 1 | SMQ050/PRO1207, CSGALNACT-1, CHGII,               |   |
| CSGALNACT2 | Chondroitin sulfate N-acetylglucosaminyltransferase 2 | beta4GalNAcT                                      |   |
| CSMD1      | CUB and Sushi multiple domains 1                      | UNQ5952/PRO19863, PPP1R24                         |   |
| CSN2       | Casein beta                                           | CASB                                              |   |
| CSNK1G1    | Casein kinase 1, gamma 1                              | CK1gamma1                                         |   |
| CSNK1G3    | Casein kinase 1, gamma 3                              | CKI-gamma 3L, CSNK1G3                             |   |
| CSNK2A2    | Casein kinase 2, alpha prime polypeptide              | CK2A2, CSNK2A1                                    |   |
| CSRNP2     | Cysteine-serine-rich nuclear protein 2                | C12orf2, C12orf22, FAM130A1, PPP1R72, TAIP-12     |   |
| CSRP3      | Cysteine and glycine-rich protein 3 (cardiac)         | CLP, CMD1M, CMH12, CRP3, LMO4, MLP                |   |
| CSTF3      | Capping stimulation factor, 3' pre-mRNA,              | CSTF-77                                           |   |
| CTAGE1     | Cytotoxic T-cell lymphoma-associated antigen 1        | UCG_2059001, CTZ1.1, CTZ1.2, CTAGE, CTAGE-1,      |   |
| CTBS       | Chitinase, di-N-acetyl-                               | CTAGE-2                                           |   |
| CTCF       | CCCTC-binding factor (zinc finger protein)            | RP11-118B23.5, CTB                                |   |
| CTDP1      | CTD (carboxy-terminal domain), RNA                    | MRD21                                             |   |
| CTDSP2     | CTD (carboxy-terminal domain), RNA                    | CCFDN, FCP1                                       |   |
| CTDSPL     | CTD (carboxy-terminal domain), RNA                    | OS4, PSR2, SCP2                                   |   |
| CTDSPL2    | CTD (carboxy-terminal domain), RNA                    | C3orf8, HYA22, PSR1, RBSP3, SCP3                  |   |
| CTGF       | Connective tissue growth factor                       | HSPC058, HSPC129                                  |   |
| CTH        | Cystathionine gamma-lyase                             | CCN2, HCS24, IGFBP8, NOV2                         |   |
| CTLA4      | Cytotoxic T-lymphocyte-associated protein 4           | CD, CD152, CELIAC3, CTLA-4, GRD4, GSE, IDDM12     |   |
| CTNNA1     | Catenin (cadherin-associated protein), alpha          | CAP102                                            |   |
| CTNNA3     | Catenin (cadherin-associated protein), alpha          | RP11-433J16.1, ARVD13, VR22                       |   |
| CTNNB1     | Catenin (cadherin-associated protein), beta 1,        | OK/SW-cl.35, CTNNB, MRD19, armadillo              | v |
| CTNND1     | Catenin (cadherin-associated protein), delta          | CAS, CTNND, P120CAS, P120CTN, p120, p120(CAS),    |   |
| CTNND2     | Catenin (cadherin-associated protein), delta          | p120(CTN)                                         |   |
| CTNS       | Cystinosis, lysosomal cystine transporter             | GT24, NPRAP                                       |   |
| CTSB       | Cathepsin B                                           | CTNS-LSB, PQLC4                                   |   |
| CTSC       | Cathepsin C                                           | APPS, CPSB                                        |   |
|            |                                                       | CIT1, DIT-1, DIT1, DIT1, HMIS, J1, J1D, TALS,     |   |
|            |                                                       | PDON1, PLS                                        |   |

|           |                                                                            |                                                                                              |  |
|-----------|----------------------------------------------------------------------------|----------------------------------------------------------------------------------------------|--|
| CTSE      | Cathepsin E                                                                | CATE                                                                                         |  |
| CTSF      | Cathepsin F                                                                | CATSF, CLN13                                                                                 |  |
| CTSO      | Cathepsin O                                                                | CTSO1                                                                                        |  |
| CTTNBP2   | Cortactin binding protein 2                                                | C7orf8, CORTBP2, Orf4                                                                        |  |
| CTTNBP2NL | CTTNBP2 N-terminal like                                                    |                                                                                              |  |
| CTXN2     | Cortixin 2                                                                 |                                                                                              |  |
| CTXN3     | Cortixin 3                                                                 | KABE                                                                                         |  |
| CUBN      | Cubilin (intrinsic factor-cobalamin receptor)                              | RP11-416D8.1, IFCR, MGA1, gp280                                                              |  |
| CUL3      | Cullin 3                                                                   | CUL-3, PHA2E                                                                                 |  |
| CUL4A     | Cullin 4A                                                                  | RP11-391H12.1                                                                                |  |
| CUL4B     | Cullin 4B                                                                  | CUL-4B, MRXHF2, MRXS15, MRXSC, SFM2                                                          |  |
| CUL5      | Cullin 5                                                                   | VACM-1, VACM1                                                                                |  |
| CUTC      | CutC copper transporter                                                    | CGI-32                                                                                       |  |
| CUX1      | Cut-like homeobox 1                                                        | CASF, CDF, CDF/Cut, CDF1, COT1, CUTL1, CUX, Cux, Cux/CDF, COL1MC, NHL10217, +100, +110, +200 |  |
| CUX2      | Cut-like homeobox 2                                                        | CDP2, CUTL2                                                                                  |  |
| CX3CL1    | Chemokine (C-X3-C motif) ligand 1                                          | A-152E3.2, ABCD-3, CSXKHC, CXC3, CXC3C, NTN, NTF, SCYD1, fractalkine, monocyte               |  |
| CXADRP2   | Coxsackie virus and adenovirus receptor                                    |                                                                                              |  |
| CXCL1     | Chemokine (C-X-C motif) ligand 1<br>(melanoma growth stimulating activity) | FSP, GRO1, GROa, MGSA, MGSA-a, NAP-3, SCYB1                                                  |  |
| CXCL12    | Chemokine (C-X-C motif) ligand 12                                          | IRH, PBSF, SCYB12, SDF1, TLSF, TPAR1                                                         |  |
| CXCL17    | Chemokine (C-X-C motif) ligand 17                                          | UNQ475/FR0642, DMC, DCip1, UNQ475, VCC-1, VCC1                                               |  |
| CXCL2     | Chemokine (C-X-C motif) ligand 2                                           | CINC-2a, GRO2, GROb, MGSA-b, MIP-2a, MIP2, MIP2A, SCYB2                                      |  |
| CXCL3     | Chemokine (C-X-C motif) ligand 3                                           | CINC-2b, GRO3, GROg, MIP-2b, MIP2B, SCYB3                                                    |  |
| CXCL5     | Chemokine (C-X-C motif) ligand 5                                           | ENA-78, SCYB5                                                                                |  |
| CXCR2P1   | Chemokine (C-X-C motif) receptor 2<br>paralog 1                            |                                                                                              |  |
| CXCR6     | Chemokine (C-X-C motif) receptor 6                                         | BONZO, CD186, STRL33, TYMSTR                                                                 |  |
| CXorf21   | Chromosome X open reading frame 21                                         |                                                                                              |  |
| CXorf22   | Chromosome X open reading frame 22                                         | RP11-307A17.1                                                                                |  |
| CXorf23   | Chromosome X open reading frame 23                                         | RP11-2406.3                                                                                  |  |
| CXorf30   | Chromosome X open reading frame 30                                         | RP11-87M18.1                                                                                 |  |
| CXorf36   | Chromosome X open reading frame 36                                         | RC3_1981055, 4950578CT9KIK, DIATK, EFQL180Z, PR02742, LA425K1.1                              |  |
| CXorf40A  | Chromosome X open reading frame 40A                                        | XX-FW81066F1.1, CXorf40, EOLA1                                                               |  |
| CXorf40B  | Chromosome X open reading frame 40B                                        |                                                                                              |  |
| CXorf48   |                                                                            |                                                                                              |  |

|          |                                                     |                                                                    |   |
|----------|-----------------------------------------------------|--------------------------------------------------------------------|---|
| CYB561D1 | Cytochrome b561 family, member D1                   | RP5-831G13.3                                                       |   |
| CYB5B    | Cytochrome b5 type B (outer mitochondrial membrane) | RP11-140H17.1, CYB5-M, CYPB5M, OMB5                                |   |
| CYB5D1   | Cytochrome b5 domain containing 1                   |                                                                    |   |
| CYB5R2   | Cytochrome b5 reductase 2                           | B5R.2                                                              |   |
| CYB5R4   | Cytochrome b5 reductase 4                           | RP4-676J13.1, NCB5OR, cb5/cb5R, dJ676J13.1                         |   |
| CYBB     | Cytochrome b-245, beta polypeptide                  | AMCBX2, CCB, GP91-1, GP91-FHOX, GP91FHOX, IMD24, NOV2, P01, RHQV   |   |
| CYGB     | Cytoglobin                                          | HGB, STAP                                                          |   |
| CYLD     | Cylindromatosis (turban tumor syndrome)             | HSPC037, BKSS, CDM11, CTED1, EAC, M11, M111, SPS, TEM, USBL2, CYLD | v |
| CYMP     | Chymosin pseudogene                                 | RP11-470L19.3                                                      |   |
| CYorf15A |                                                     |                                                                    |   |
| CYP11B1  | Cytochrome P450, family 11, subfamily B,            | CPN1, CYP11B, FHI, P450C11                                         |   |
| CYP19A1  | Cytochrome P450, family 19, subfamily A,            | AKO, AKO1, CYP1, CTAK, CYP19, CYP19A, P-450ABOM                    |   |
| CYP1B1   | Cytochrome P450, family 1, subfamily B,             | CP1B, CYP1B1, GLC3A, P4501B1                                       |   |
| CYP20A1  | Cytochrome P450, family 20, subfamily A,            | UNQ667/PRO1301, CYP-M                                              |   |
| CYP26A1  | Cytochrome P450, family 20, subfamily A,            | RP11-348J12.1, CP26, CYP26, P450RAI, P450RAI1                      |   |
| CYP26B1  | Cytochrome P450, family 20, subfamily B,            | CYP26A2, P450RAI-2, P450RAI2, RHFCA                                |   |
| CYP2B7P1 | polypeptide 1                                       |                                                                    |   |
| CYP2C18  | Cytochrome P450, family 2, subfamily C,             | M11-40014.4, CFC1, CYP2C, CYP2C17, P450-0B/29C, P450HC17           |   |
| CYP2C8   | Cytochrome P450, family 2, subfamily C,             | CPC8, CYP11C8, MP-12/MP-20                                         |   |
| CYP2R1   | Cytochrome P450, family 2, subfamily R,             |                                                                    |   |
| CYP2U1   | Cytochrome P450, family 2, subfamily U,             | P450TEC, SPG49, SPG56                                              |   |
| CYP39A1  | Cytochrome P450, family 39, subfamily A,            |                                                                    |   |
| CYP3A43  | Cytochrome P450, family 3, subfamily A,             |                                                                    |   |
| CYP46A1  | Cytochrome P450, family 40, subfamily A,            | CP46, CYP46                                                        |   |
| CYP4A11  | Cytochrome P450, family 4, subfamily A,             | CP4Y, CYP4A2, CYP4AII                                              |   |
| CYP4F11  | Cytochrome P450, family 4, subfamily F,             | CYPIVF11                                                           |   |
| CYP4F2   | Cytochrome P450, family 4, subfamily F,             | CPF2                                                               |   |
| CYP4F3   | Cytochrome P450, family 4, subfamily F,             | CPF3, CYP4F, LTB4H                                                 |   |
| CYP4V2   | Cytochrome P450, family 4, subfamily V,             | UNQ2560, BCD, CYP4AH1                                              |   |
| CYP7A1   | Cytochrome P450, family 7, subfamily A,             | CP7A, CYP7, CYPVII                                                 |   |
| CYR61    | Cysteine-rich, angiogenic inducer, 61               | CCN1, GIG1, IGFBP10                                                |   |
| CYS1     | Cystin 1                                            |                                                                    |   |
| CYTSA    |                                                     |                                                                    |   |

|          |                                                          |                                                   |   |
|----------|----------------------------------------------------------|---------------------------------------------------|---|
| CYTSB    |                                                          |                                                   |   |
| D2HGDH   | D-2-hydroxyglutarate dehydrogenase                       | hCG_31745, D2HGD                                  |   |
| D4S234E  |                                                          |                                                   |   |
| DAAM1    | Dishevelled associated activator of morphogenesis 1      |                                                   |   |
| DAB2IP   | DAB2 interacting protein                                 | RP11-298A17.1, AF9Q34, AIP-1, AIP1, DIP1/2        |   |
| DACH1    | Dachshund family transcription factor 1                  | RP11-512J14.1, DACH                               |   |
| DACH2    | Dachshund family transcription factor 2                  | RP11-345E19.1                                     |   |
| DACT1    | Dishevelled-binding antagonist of beta-catenin 1         | DAPPER, DAPPER1, DPK1, PRODC, HDPK1, THYEX2       |   |
| DACT3    | Dishevelled-binding antagonist of beta-catenin 3         | DAPPER3, RRR1                                     |   |
| DAD1     | Defender against cell death 1                            | OST2                                              |   |
| DAGLB    | Diacylglycerol lipase, beta                              | tcag7.842ETA, KCCR13L, DAGLB                      |   |
| DAK      | Dihydroxyacetone kinase 2 homolog (S. pombe)             | NET45                                             |   |
| DALRD3   | DALRK and coilin binding domain containing 3             |                                                   |   |
| DAOA     | D-amino acid oxidase activator                           | RP11-166E2.2, LG72, SG72                          |   |
| DAPP1    | Dual adaptor of phosphotyrosine and 5-phosphonucleotides | HSPC066, BAM32                                    |   |
| DARS     | Aspartyl-tRNA synthetase                                 | PIG40, HBSL, aspRS                                |   |
| DAXX     | Death-domain associated protein                          | DADB-159G18.9, BING2, DAP6, EAP1                  | v |
| DAZ1     | Deleted in azoospermia 1                                 | DAZ, SPGY                                         |   |
| DAZ2     | Deleted in azoospermia 2                                 | pDP1678                                           |   |
| DAZ3     | Deleted in azoospermia 3                                 | pDP1679                                           |   |
| DAZ4     | Deleted in azoospermia 4                                 | pDP1680, pDP1681                                  |   |
| DAZAP2   | DAZ associated protein 2                                 | PRTB                                              |   |
| DAZL     | Deleted in azoospermia-like                              | DAZH1, DAZLA, SPGYLA, DAZL                        |   |
| DBF4B    | DBF4 zinc finger B                                       | UNQ3002, ASKL1, CHIFB, DRF1, ZDBF1B               |   |
| DBT      | Dihydrobiopamine branched chain aminoxidase F2           | RP11-305E17.3, BCATEZ, BCKAD-EZ, BCKADEZ, EZ, F2B |   |
| DBX2     | Developing brain homeobox 2                              |                                                   |   |
| DCAF11   | DDB1 and CUL4 associated factor 11                       | GL014, PRO2389, WDR23                             |   |
| DCAF12L1 | DDB1 and CUL4 associated factor 12-like 1                | KIAA1892L, WDR40B                                 |   |
| DCAF16   | DDB1 and CUL4 associated factor 16                       | C4orf30                                           |   |
| DCAF17   | DDB1 and CUL4 associated factor 17                       | C2orf37                                           |   |
| DCAF4    | DDB1 and CUL4 associated factor 4                        | WDR21, WDR21A                                     |   |
| DCAF4L1  | DDB1 and CUL4 associated factor 4-like 1                 | WDR21B                                            |   |
| DCAF4L2  | DDB1 and CUL4 associated factor 4-like 2                 | WDR21C                                            |   |

|         |                                                                               |                                                                   |   |
|---------|-------------------------------------------------------------------------------|-------------------------------------------------------------------|---|
| DCAF5   | DDB1 and CUL4 associated factor 5                                             | BCRG2, BCRP2, D14S1461E, WDR22                                    |   |
| DCAF6   | DDB1 and CUL4 associated factor 6                                             | RP4-743H4.1, 1200000M0J0K1K, ARCAF1, IQWDT1, MCTP055, NRIP, DC326 |   |
| DCAF8   | DDB1 and CUL4 associated factor 8                                             | RP11-574F21.1, GAN2, H326, WDR42A                                 |   |
| DCBLD1  | Discorin, CUB and ECEL domain containing 1                                    | RP1-94G16.1, dJ94G16.1                                            |   |
| DCBLD2  | Discorin, CUB and ECEL domain containing 2                                    | CLCP1, ESDN                                                       |   |
| DCC     | DCC netrin 1 receptor                                                         | CRC18, CRCR1, IGDCC1, MRMV1, NTN1R1                               |   |
| DCLK1   | Doublecortin-like kinase 1                                                    | RP11-115F14.1, CLT, CLICK1, DCAMKL1, DCDC5A, DCZ, CLIC1           |   |
| DCLK2   | Doublecortin-like kinase 2                                                    | DCZ, CLIC1, CLIC2, CLIC3, CLIC4, DCAMKL2, DCDC3, DCDC3B, DCK3     |   |
| DCLK3   | Doublecortin-like kinase 3                                                    | hCG_16695, CLR, DCAMKL3, DCDC3C, DCK3                             |   |
| DCLRE1C | DNA cross-link repair 1C                                                      | RP11-578C13.3, A-SCID, DCLRE1C, NS-SCID, SCDA, SNM1C              |   |
| DCN     | Decorin                                                                       | CSCD, DSPG2, PG40, PGII, PGS2, SLRR1B                             |   |
| DCP1A   | Decapping mRNA 1A                                                             | HSA275986, Nbla00360, SMAD4IP1, SMIF                              |   |
| DCP2    | Decapping mRNA 2                                                              | NUDT20                                                            |   |
| DCTD    | DCMP deaminase                                                                |                                                                   |   |
| DCUN1D1 | DCN1, defective in cumm neddylation 1, DCN1; defective in cumm neddylation 1, | DCNL1, DCUN1L1, RP42, SCCRO, SCRO, Tes3                           |   |
| DCUN1D2 | DCN1, defective in cumm neddylation 1,                                        | RP11-102K13.4, C13orf17                                           |   |
| DCUN1D4 | DCN1, defective in cumm neddylation 1, domain containing 4                    |                                                                   |   |
| DCX     | Doublecortin                                                                  | RP5-914P14.1, DBCN, DC, LISX, SCLH, XLIS                          |   |
| DDAH1   | Dimethylarginine dimethylaminohydrolase 1                                     | RP4-621F18.1, DDAH, HEL-S-16                                      |   |
| DDHD1   | DDHD domain containing 1                                                      | PA-PLA1, PAPLA1, SPG28                                            |   |
| DDHD2   | DDHD domain containing 2                                                      | SAMWD1, SPG54, iPLA(1)gamma                                       |   |
| DDI2    | DNA-damage inducible 1 homolog 2 (D. rerio)                                   | RP4-680D5.5                                                       |   |
| DDIT4   | DNA-damage-inducible transcript 4                                             | RP11-442H21.1, Dig2, REDD-1, REDD1                                |   |
| DDO     | D-aspartate oxidase                                                           | RP1-261K5.2, DASOX-1, DDO-2, DDO                                  |   |
| DDTL    | D-dopachrome tautomerase-like                                                 | KB-226F1.2                                                        |   |
| DDX10   | DEAD (Asp-Glu-Ala-Asp) box polypeptide 10                                     | HRH-J8                                                            | v |
| DDX12   | DEAD (Asp-Glu-Ala-Asp/His) box polypeptide 12                                 | CHLR2                                                             |   |
| DDX18   | DEAD (Asp-Glu-Ala-Asp) box polypeptide 18                                     | MrDb                                                              |   |
| DDX19A  | DEAD (Asp-Glu-Ala-Asp) box polypeptide 19A                                    | DDX19-DDX19L, DDX19L                                              |   |
| DDX20   | DEAD (Asp-Glu-Ala-Asp) box polypeptide 20                                     | DP103, GEMIN3                                                     |   |
| DDX21   | DEAD (Asp-Glu-Ala-Asp) box helicase 21                                        | GUA, GURDB, RH-II/GU, RH-II/GuA                                   |   |
| DDX25   | DEAD (Asp-Glu-Ala-Asp) box helicase 25                                        | GRTH                                                              |   |
| DDX26B  | DEAD/II (Asp-Glu-Ala-Asp/His) box polypeptide 26B                             | RP11-432N13.1                                                     |   |

|         |                                                                          |                                               |   |
|---------|--------------------------------------------------------------------------|-----------------------------------------------|---|
| DDX31   | DEAD (Asp-Glu-Ala-Asp) box polypeptide 21                                | PPP1R25                                       |   |
| DDX3X   | DEAD (Asp-Glu-Ala-Asp) box helicase 3, A                                 | DBX, DDX14, DDX3, HLP2                        |   |
| DDX3Y   | DEAD (Asp-Glu-Ala-Asp) box helicase 3, Y                                 | DBY                                           |   |
| DDX43   | DEAD (Asp-Glu-Ala-Asp) box polypeptide 43                                | CT13, HAGE                                    |   |
| DDX46   | DEAD (Asp-Glu-Ala-Asp) box polypeptide 46                                | PRPF5, Prp5                                   |   |
| DDX47   | DEAD (Asp-Glu-Ala-Asp) box polypeptide 47                                | E4-DBP, HQ0256, MSTP162, RRP3                 |   |
| DDX5    | DEAD (Asp-Glu-Ala-Asp) box helicase 5                                    | G17P1, HLR1, HUM68, p68                       | v |
| DDX50   | DEAD (Asp-Glu-Ala-Asp) box polypeptide 50                                | GU2, GUB, RH-II/GuB, mcdrh                    |   |
| DDX51   | DEAD (Asp-Glu-Ala-Asp) box polypeptide 51                                |                                               |   |
| DDX52   | DEAD (Asp-Glu-Ala-Asp) box polypeptide 52                                | HUSSY-19, HUSSY19, ROK1                       |   |
| DDX55   | DEAD (Asp-Glu-Ala-Asp) box polypeptide 55                                |                                               |   |
| DDX58   | DEAD (Asp-Glu-Ala-Asp) box polypeptide 58                                | RP11-334P12.2, RIG-I, RIGI, RLR-1             |   |
| DDX60   | DEAD (Asp-Glu-Ala-Asp) box polypeptide 60                                |                                               |   |
| DDX60L  | DEAD (Asp-Glu-Ala-Asp) box polypeptide 60L                               |                                               |   |
| DEC1    | Deleted in esophageal cancer 1                                           | CTS9                                          |   |
| DEF8    | Differentially expressed in TDC1 8 homolog (mouse)                       |                                               |   |
| DEFA4   | Defensin, alpha 4, corticostatin                                         | DEF4, HNP-4, HP-4, HP4                        |   |
| DEFB132 | Defensin, beta 132                                                       | RP5-1103G7.1, DEFB32, UNQ827                  |   |
| DEK     | DEK proto-oncogene                                                       | D6S231E                                       | v |
| DEM1    |                                                                          |                                               |   |
| DENND1A | DENN/MADD domain containing 1A                                           | RP11-230L22.3, FAM31A, KIAA1608               |   |
| DENND1B | DENN/MADD domain containing 1B                                           | RP11-53124.2, C1ORF18, C1orf218, FAM31B       |   |
| DENND3  | DENN/MADD domain containing 3                                            |                                               |   |
| DENND4A | DENN/MADD domain containing 4A                                           | IRLB, MYCPBP                                  |   |
| DENND4B | DENN/MADD domain containing 4B                                           | hCG_18235, KIAA0476                           |   |
| DENND4C | DENN/MADD domain containing 4C                                           | RP11-513M16.1, C9orf55, C9orf55B, bA513M16.3  |   |
| DENND5B | DENN/MADD domain containing 5B                                           |                                               |   |
| DEPDC1  | DEP domain containing 1                                                  | DEP.8-V2, DEPDC1A, SDP35, DEPDC1              |   |
| DEPDC5  | DEP domain containing 5                                                  | LL22NC03-113A11.1, DEP.5, FFEVF               |   |
| DEPDC6  |                                                                          |                                               |   |
| DERL1   | Derlin 1                                                                 | UNQ243/PRO276, DER-1, DER1                    |   |
| DFFB    | DNA fragmentation factor, 40 kDa, beta subunit (caspase-activated DNase) | RP13-531C17.1, CAD, CPAN, DFF-40, DFF2, DFF40 |   |
| DGCR2   | DiGeorge syndrome critical region gene 2                                 | DGS-C, IDD, LAN, SEZ-12                       |   |



|         |                                                                 |                                                                                                                            |   |
|---------|-----------------------------------------------------------------|----------------------------------------------------------------------------------------------------------------------------|---|
| DGCR5   | DGeorge syndrome critical region gene 5<br>(non-protein coding) | LINC00037, NCRNA00037                                                                                                      |   |
| DGCR8   | DGCR8 microprocessor complex subunit                            | LP4941, C22orf12, DGCRK6, Gy1, pasha                                                                                       |   |
| DGKB    | Diacylglycerol kinase, beta 90 kDa                              | DAGK2, DGK, DGK-BETA                                                                                                       |   |
| DGKD    | Diacylglycerol kinase, delta 130 kDa                            | DGKdelta, dgkd-2                                                                                                           |   |
| DGKE    | Diacylglycerol kinase, epsilon 64 kDa                           | DAGK5, DAGK6, DGK, NPHS7                                                                                                   |   |
| DGKH    | Diacylglycerol kinase, eta                                      | RP11-215B13.1, DGKeta                                                                                                      |   |
| DGKI    | Diacylglycerol kinase, iota                                     | DGK-IOTA                                                                                                                   |   |
| DHCR24  | 24-Dehydrocholesterol reductase                                 | DCE, Nbla03646, SELADIN1, seladin-1                                                                                        |   |
| DHDPSL  | 4-Hydroxy-2-oxoglutarate aldolase 1                             | KT11-546K25.9, C100H03, DHDPS2, DHDPSL, HIF3,<br>NPL2                                                                      |   |
| DHODH   | Dihydroorotate dehydrogenase (quinone)                          | DHOdehase, POADS, URA1                                                                                                     |   |
| DHRS2   | Dehydrogenase/reductase (SDR family)                            | HEP27, SDR25C1                                                                                                             |   |
| DHRS4L2 | Dehydrogenase/reductase (SDR family)                            | SDR25C3                                                                                                                    |   |
| DHRS9   | Dehydrogenase/reductase (SDR family)                            | UNQ855/TKO1773, 3-alpha-HSD, 3ALPHA-HSD, KDIF-<br>R1-PP325D9.2, C20H11, PDHK3X, DTRK3PTT,<br>DURSX, SDR46C1, SDR76C, DURSX |   |
| DHRSX   | Dehydrogenase/reductase (SDR family) A-                         |                                                                                                                            |   |
| DHTKD1  | Dehydrogenase ET and transketolase domain<br>containing 1       | AMOXAD, CMT2Q                                                                                                              |   |
| DHX15   | DEAH (Asp-Glu-Ala-His) box helicase 15                          | DBP1, DDX15, HRH2, PRP43, PRPF43, PrPp43p                                                                                  |   |
| DHX29   | DEAH (Asp-Glu-Ala-His) box polypeptide<br>29                    | DDX29                                                                                                                      |   |
| DHX33   | DEAH (Asp-Glu-Ala-His) box polypeptide<br>33                    | DDX33                                                                                                                      |   |
| DHX35   | DEAH (Asp-Glu-Ala-His) box polypeptide<br>35                    | DDX33                                                                                                                      |   |
| DHX40   | DEAH (Asp-Glu-Ala-His) box polypeptide<br>40                    | ARG147, DDX40, PAD                                                                                                         |   |
| DHX57   | DEAH (Asp-Glu-Ala-Asp/His) box<br>polypeptide 57                | DDX57                                                                                                                      |   |
| DIAPH1  | Diaphanous-related formin 1                                     | DFNA1, DIA1, DRF1, LFHL1, hDIA1                                                                                            |   |
| DIAPH3  | Diaphanous-related formin 3                                     | KT11-20F21.1, AN, AUNAI, DIA2, DRF3, NSDAN,<br>Dica2, mDica2                                                               |   |
| DICER1  | Dicer 1, ribonuclease type III                                  | DCR1, Dicer, Dicer1e, HERNA, MNG1, RMSE2                                                                                   | v |
| DIDO1   | Death inducer-oblierator 1                                      | KT5-885E7.1, BTEL, C200H58, DAIT-1, DAIT1,<br>DIDO2, DIDO2, DIO-1, DIO1, JH85L7.9                                          |   |
| DIO2    | Deiodinase, iodothyronine, type II                              | 5DII, D2, DIOII, SelY, TXDI2                                                                                               |   |
| DIP2A   | Dip2 disc-interacting protein 2 homolog A                       | C21orf106, DIP2                                                                                                            |   |
| DIP2B   | Dip2 disc-interacting protein 2 homolog C                       | RP11-486H9.2, KIAA0934                                                                                                     |   |
| DIP2C   | Dip2 disc-interacting protein 2 homolog C<br>(Drosophila)       | RP11-486H9.2, KIAA0934                                                                                                     |   |
| DIRAS3  | DIRAS family, GTP-binding RAS-like 3                            | ARHI, NOEY2                                                                                                                |   |
| DIRC1   | Disrupted in renal carcinoma 1                                  |                                                                                                                            |   |
| DIS3    | DIS3 exosome endoribonuclease and 5'-5'<br>exoribonuclease      | KT11-542J4.5, Z810028N0TRK, EXOSC11, KIAA1008,<br>DDP44, dca2a                                                             |   |
| DIS3L   | DIS3 like exosome 3'-5' exoribonuclease                         | DIS3L1                                                                                                                     |   |

|              |                                                         |                                                                                  |  |
|--------------|---------------------------------------------------------|----------------------------------------------------------------------------------|--|
| DIS3L2       | DIS3 like 3'-5' exoribonuclease 2                       | FAM6A, PRLMNS, hDIS3L2                                                           |  |
| DISC1        | Disrupted in schizophrenia 1                            | RP4-730B13.1, C1orf136, SCZD9                                                    |  |
| DIXDC1       | DIX domain containing 1                                 | CCD1                                                                             |  |
| DKC1         | Dyskeratosis congenita 1, dyskerin                      | CBF5, DKC, DKCX, NAP57, NOLA4, XAP101                                            |  |
| DKFZP434L187 | Uncharacterized LOC26082                                |                                                                                  |  |
| DKFZP080D063 |                                                         |                                                                                  |  |
| DKFZP080G132 |                                                         |                                                                                  |  |
| DKFZP781G011 |                                                         |                                                                                  |  |
| DKK1         | Dickkopf1 WNT signaling pathway inhibitor 1             | UNQ492/PRO1008, DKK-1, SK                                                        |  |
| DKK3         | Dickkopf1 WNT signaling pathway inhibitor 3             | UNQ258/PRO295, REIC, RIG                                                         |  |
| DLC1         | DLC1 Rho GTPase activating protein                      | ARHGAP7, HP, STARD12, p122-RhoGAP                                                |  |
| DLD          | Dihydrolipoamide dehydrogenase                          | tcag7.39D, DLDH, E3, GCSL, LAD, PHE3, DLD                                        |  |
| DLEU1        | Deleted in lymphocytic leukemia 1 (non-pentamer domain) | RP11-173B12.1, BCM3, BCM31, DLE1, DLEU2, LEU1, LEU2, LINC00021, NCRNA00021, XTRC |  |
| DLEU7        | Deleted in lymphocytic leukemia, 7                      |                                                                                  |  |
| DLG1         | Discs, large homolog 1 (Drosophila)                     | DLGH1, SAP-97, SAP97, dJ1061C18.1.1, hdlg                                        |  |
| DLG2         | Discs, large homolog 2 (Drosophila)                     | PPP1R58, PSD-93, PSD93, chapsyn-110                                              |  |
| DLGAP1       | Discs, large (Drosophila) homolog-1                     | DAF-1, DAF-1-ALPHA, DAF-1-BETA, DAF1A, DLGAP1B, CKAR, SAPAP1, LCKAR, DLGAP1      |  |
| DLGAP2       | Discs, large (Drosophila) homolog-2                     | DAP2, SAPAP2                                                                     |  |
| DLGAP5       | Discs, large (Drosophila) homolog-associated protein 5  | DLG7, HURP                                                                       |  |
| DLK2         | Delta-like 2 homolog (Drosophila)                       | RP5-895C5.2, DLK-2, EGFL9                                                        |  |
| DLL1         | Delta-like 1 (Drosophila)                               | UNQ146/PRO172, DELTA1, DL1, Delta                                                |  |
| DLL4         | Delta-like 4 (Drosophila)                               | UNQ1895/PRO4341, hdelta2                                                         |  |
| DLX1         | Distal-less homeobox 1                                  |                                                                                  |  |
| DLX3         | Distal-less homeobox 3                                  | AI4, TDO                                                                         |  |
| DLX5         | Distal-less homeobox 5                                  | SHFM1D                                                                           |  |
| DLX6         | Distal-less homeobox 6                                  |                                                                                  |  |
| DMAP1        | DNA methyltransferase 1 associated protein 1            | RP5-891H21.2, DNMAF1, DNMTAF1, EAF2, MEAF2, SWC4                                 |  |
| DMBX1        | Diencephalon/mesencephalon homeobox 1                   | MBX, OTX3, PAXB                                                                  |  |
| DMC1         | DNA meiotic recombinase 1                               | RP1-199H16.4H, LIM15, dJ199H16.1, DMC1                                           |  |
| DMGDH        | Dimethylglycine dehydrogenase                           | DMGDHD, ME2GLYDH                                                                 |  |
| DMP1         | Dentin matrix acidic phosphoprotein 1                   | ARHP, ARHR, DMP-1                                                                |  |
| DMRT1        | Doublesex and mab-5 related transcription factor 1      | CT154, DMT1                                                                      |  |
| DMRT3        | Doublesex and mab-5 related transcription factor 3      | RP11-143M15.2, DMRTA3                                                            |  |

|         |                                                    |                                                                     |  |
|---------|----------------------------------------------------|---------------------------------------------------------------------|--|
| DMRTC1  | DMRT-like family C1                                |                                                                     |  |
| DMTF1   | Cyclic D binding myo-like transcription factor     | DMP1, DMTF, MRUL, hDMP1                                             |  |
| DMWD    | <i>Dystrophia myotomica</i> , WD repeat containing | D19S593E, DMR-N9, DMRN9, gene59                                     |  |
| DMXL1   | Dmx-like 1                                         |                                                                     |  |
| DMXL2   | Dmx-like 2                                         | RC3                                                                 |  |
| DNAH14  | Dynein, axonemal, heavy chain 14                   | RP11-328N1.1, C1orf67, Dnahc14, HL-18, HL18                         |  |
| DNAH5   | Dynein, axonemal, heavy chain 5                    | CILD3, DNAHC5, HL1, KTGNR, PCD                                      |  |
| DNAH8   | Dynein, axonemal, heavy chain 8                    | RP1-202I21.7, ATPase, hdhc9                                         |  |
| DNAH9   | Dynein, axonemal, heavy chain 9                    | DNAH17L, DNEL1, DYH9, Dnahc9, HL-20, HL20                           |  |
| DNAJA2  | DnaJ (Hsp40) homolog, subfamily A, member 2        | CPK3, DJ3, DJAZ, DNAJ, DNJ3, HHR23, PRO3013, RNF2                   |  |
| DNAJA3  | DnaJ (Hsp40) homolog, subfamily A, member 3        | HCA57, TID1, hTID-1                                                 |  |
| DNAJA4  | DnaJ (Hsp40) homolog, subfamily A, member 4        | MST104, MSTP104, PRO1472                                            |  |
| DNAJB1  | DnaJ (Hsp40) homolog, subfamily B, member 1        | HSPF1, Hdj1, Hsp40, RSPH16B, Sis1                                   |  |
| DNAJB12 | DnaJ (Hsp40) homolog, subfamily B, member 12       | DJ10                                                                |  |
| DNAJB14 | DnaJ (Hsp40) homolog, subfamily B, member 14       | UNQ9427/PRO34683, EGNR9427, PRO34683                                |  |
| DNAJB3  | DnaJ (Hsp40) homolog, subfamily B, member 3        | DnaJ (Hsp40) homolog, subfamily B, member 3                         |  |
| DNAJB5  | DnaJ (Hsp40) homolog, subfamily B, member 5        | RP11-392A14.5, Hsc40                                                |  |
| DNAJB6  | DnaJ (Hsp40) homolog, subfamily B, member 6        | Ucag7.555, DJ4, DnaJ, HHR21, HSP-2, HSP2, LOMD1D, LOMD1E, MBL, MSL1 |  |
| DNAJB7  | DnaJ (Hsp40) homolog, subfamily B, member 7        | DJ5, HSC3                                                           |  |
| DNAJC10 | DnaJ (Hsp40) homolog, subfamily C, member 10       | UNQ495/PRO1012, ERdj5, JPDI, MTHr, PDIA19                           |  |
| DNAJC13 | DnaJ (Hsp40) homolog, subfamily C, member 13       | RME8                                                                |  |
| DNAJC15 | DnaJ (Hsp40) homolog, subfamily C, member 15       | GIG22, DNAJD1, HSD18, MCJ                                           |  |
| DNAJC16 | DnaJ (Hsp40) homolog, subfamily C, member 16       | RP4-680D5.1                                                         |  |
| DNAJC18 | DnaJ (Hsp40) homolog, subfamily C, member 18       |                                                                     |  |
| DNAJC2  | DnaJ (Hsp40) homolog, subfamily C, member 2        | MPHOSPH11, MPP11, ZRF1, ZUO1                                        |  |
| DNAJC21 | DnaJ (Hsp40) homolog, subfamily C, member 21       | DNAJA5, GS3, JJJ1                                                   |  |
| DNAJC24 | DnaJ (Hsp40) homolog, subfamily C, member 24       | AC108456.1, DPH4, JJJ3, ZCSL3                                       |  |
| DNAJC25 | DnaJ (Hsp40) homolog, subfamily C, member 25       | bA16L21.2.1                                                         |  |
| DNAJC27 | DnaJ (Hsp40) homolog, subfamily C, member 27       | RBJ, RabJS                                                          |  |
| DNAJC3  | DnaJ (Hsp40) homolog, subfamily C, member 3        | ERdj6, HP58, P58, P58IPK, PRKRI                                     |  |
| DNAJC30 | DnaJ (Hsp40) homolog, subfamily C, member 30       | WBSCR18                                                             |  |
| DNAJC5  | DnaJ (Hsp40) homolog, subfamily C, member 5        | CLN4, CLN4B, CSPA, NCL, DNAJC5                                      |  |
| DNAJC5B | DnaJ (Hsp40) homolog, subfamily C, member 5 beta   | CSP-beta                                                            |  |

|           |                                               |                                                                                      |   |
|-----------|-----------------------------------------------|--------------------------------------------------------------------------------------|---|
| DNAJC5G   | DnaJ (Hsp40) homolog, subfamily C,            | CSP-gamma                                                                            |   |
| DNAJC6    | DnaJ (Hsp40) homolog, subfamily C,            | DJC6, PARK19                                                                         |   |
| DNAJC7    | DnaJ (Hsp40) homolog, subfamily C,            | DJ11, DJC7, TPR2, TTC2                                                               |   |
| DNAL1     | member 7                                      |                                                                                      |   |
| DNAL1     | Dynein, axonemal, light chain 1               | C14orf168, CILD16                                                                    |   |
| DNASE1    | Deoxyribonuclease I                           | DNL1, DRNI                                                                           |   |
| DNER      | Delta/notch-like EGF repeat containing        | UNQ262/PRO299, UNQ26, bet                                                            |   |
| DNHD1     | Dynein heavy chain domain 1                   | UNQ5781/PRO12970, C11orf47, CCDC33, DRCBTL,<br>DNHD1                                 |   |
| DNM1      | Dynamamin 1                                   | DNM                                                                                  |   |
| DNM2      | Dynamamin 2                                   | CMT2M, CMTD1, CMTD1B, DFCMTB, DTN2,<br>DNM2, LCCS5                                   | v |
| DNM3      | Dynamamin 3                                   | RP1-106H8.3, Dyna III                                                                |   |
| DNMT3B    | DNA (cytosine-5-)-methyltransferase 3 beta    | RP5-1085F17.2, ICF, ICF1, M.HsaIIIB                                                  |   |
| DOC2A     | Double C2-like domains, alpha                 | Doc2                                                                                 |   |
| DOCK10    | Dedicator of cytokinesis 10                   | DRIP2, Nbla10300, ZIZ3                                                               |   |
| DOCK2     | Dedicator of cytokinesis2                     |                                                                                      |   |
| DOCK4     | Dedicator of cytokinesis4                     | WUGSC:H_GS034D21.1                                                                   |   |
| DOCK5     | Dedicator of cytokinesis5                     |                                                                                      |   |
| DOCK7     | Dedicator of cytokinesis7                     | RP4-740B20.2, EIEE23, ZIR2                                                           |   |
| DOCK8     | Dedicator of cytokinesis8                     | RP11-165F24.7, HEL-205, MRD2, ZIR8                                                   |   |
| DOCK9     | Dedicator of cytokinesis9                     | RP11-155N3.2, ZIZ1, ZIZIMIN1                                                         |   |
| DOPEY1    | Dopey family member 1                         | RP1-202D23.2, KIAA1117, dJ202D23.2                                                   |   |
| DOPEY2    | Dopey family member 2                         | 21orf5, C21orf5                                                                      |   |
| DOT1L     | DOT1-like histone H3K79 methyltransferase     | DOT1, KMT4                                                                           |   |
| DPAGT1    | Donchyl-phosphate (UDP-N-acetylglucosamine) N | ALG7, CDG-1j, CDG1j, CMSTAZ, DTIS300, DPAT1,<br>DPACT, DPACT2, G1PT, GPT, HACT, HCAT |   |
| DPF1      | D4, zinc and double PHD fingers family 1      | BAF45b, NEUD4, neuro-d4                                                              |   |
| DPH3      | Diphthamide biosynthesis 3                    | DELGIP, DELGIP1, DESR1A, KTI11, ZCSL2, DPH3                                          |   |
| DPP10     | Dipeptidyl-peptidase 10 (non-functional)      | DPL2, DPPY, DPRP-3, DPRP3                                                            |   |
| DPP6      | Dipeptidyl-peptidase 6                        | DPPX, VF2                                                                            |   |
| DPPA2     | Developmental pluripotency associated 2       | CT100, ECAT15-2, PESCRG1                                                             |   |
| DPPA3     | Developmental pluripotency associated 3       | 2410075G02Rik, PCG7, PGC7, Stella                                                    |   |
| DPY19L1   | Dpy-19-like 1 ( <i>C. elegans</i> )           | hCG_1645499                                                                          |   |
| DPY19L2   | Dpy-19-like 2 ( <i>C. elegans</i> )           | UNQ3127/PRO10284, SPATA34, SPGF9                                                     |   |
| DPY19L2P1 | DPY19L2 pseudogene 1                          |                                                                                      |   |
| DPY19L2P3 | DPY19L2 pseudogene 3                          |                                                                                      |   |

|         |                                                                   |                                                                                  |  |
|---------|-------------------------------------------------------------------|----------------------------------------------------------------------------------|--|
| DPY19L4 | Dpy-19-like 4 ( <i>C. elegans</i> )                               |                                                                                  |  |
| DPY30   | Dpy-30 homolog ( <i>C. elegans</i> )                              | Cps25, HDPY-30, Saf19                                                            |  |
| DPYD    | Dihydropyrimidine dehydrogenase                                   | DHP, DHPDHASE, DPD                                                               |  |
| DPYSL2  | Dihydropyrimidinase-like 2                                        | CRMP-2, CRMP2, DHPK12, DHP-2, DHP2, INZAS, ULIP2, ULIP2                          |  |
| DPYSL5  | Dihydropyrimidinase-like 5                                        | CRAM, CRMP-5, CRMP5, Ulip6                                                       |  |
| DR1     | Down-regulator of transcription 1, TDP-1                          | NC2, NC2-BETA                                                                    |  |
| DRAM1   | DNA-damage regulated autophagy modulator 1                        | DRAM                                                                             |  |
| DRD2    | Dopamine receptor D2                                              | D2DR, D2R                                                                        |  |
| DRP2    | Dystrophin related protein 2                                      | GHc-521F8.2, DRP-2                                                               |  |
| DSC1    | Desmocollin 1                                                     | CDHF1, DG2/DG3                                                                   |  |
| DSC2    | Desmocollin 2                                                     | ARVD11, CDHF2, DG2, DGII/III, DSC3                                               |  |
| DSC3    | Desmocollin 3                                                     | CDHF3, DSC, DSC1, DSC2, DSC4, HT-CP                                              |  |
| DSCR8   | Down syndrome critical region gene 8                              | C210H05, C125.1a, C125.1b, MIMIA-1, MIMIA-1a, MIMIA-1b, MMA1, MTAC2              |  |
| DSE     | Dermatan sulfate epimerase                                        | DSEPPI, EDSCM2, SART-2, SART2, DSE                                               |  |
| DSEL    | Dermatan sulfate epimerase-like                                   | C18orf4                                                                          |  |
| DSN1    | DSN1, MIST2 kinetochore complex component                         | KIF3-409A15.1, C200H172, KINL3, MIST3, W409A15.2, KYNL2                          |  |
| DST     | Dystonin                                                          | KIF3-501H4.2, D1240, D1A, D1A01, CATA-15, CATE15, D681401, DMIL-RT, EDCP2, USAN6 |  |
| DSTN    | Destrin (actin depolymerizing factor)                             | ACTDP, ADF, HEL32, bA462D18.2                                                    |  |
| DSTYK   | Dual serine/threonine and tyrosine protein kinase                 | HDCMD38P, CAKUT1, DustyPK, RIP5, RIPK5                                           |  |
| DTD1    | D-tyrosyl-tRNA deacylase 1                                        | C200H88, DCL-B, DCLB, HAKS2, UA3793.3, bA555E18.1, paa_69                        |  |
| DTNA    | Dystrobrevin, alpha                                               | D18S892E, DRP3, DTN, DTN-A, LVNC1                                                |  |
| DTNB    | Dystrobrevin, beta                                                |                                                                                  |  |
| DTWD1   | DTW domain containing 1                                           | MDS009                                                                           |  |
| DTX4    | Deltex 4, E3 ubiquitin ligase                                     | RNF155                                                                           |  |
| DUOX2   | Dual oxidase 2                                                    | LNOX2, NOXEF2, P138-TOX, TDH6, THOX2                                             |  |
| DUSP10  | Dual specificity phosphatase 10                                   | MKP-5, MKP5                                                                      |  |
| DUSP11  | Dual specificity phosphatase 11 (KIN4/KIN1 complex 1, interactor) | PIR1                                                                             |  |
| DUSP13  | Dual specificity phosphatase 13                                   | KIF11-46713.0, BDDFA, DUSP13B, MDS1, SKNF4, TMDB, DUSP13                         |  |
| DUSP19  | Dual specificity phosphatase 19                                   | DUSP17, LMWDSP3, SKRP1, TS-DSP1                                                  |  |
| DUSP22  | Dual specificity phosphatase 22                                   | KIF11-528C17.1, JKAP, JSF-1, JSF1, LMW-DSP2, LMWDSP2, MZB, MZBV, VHV             |  |
| DUSP26  | Dual specificity phosphatase 26                                   | DUSP24, LDP-4, MKP8, NATA1, SKRP3                                                |  |
| DUSP28  | Dual specificity phosphatase 28                                   | DUSP26, VHP                                                                      |  |
| DUSP3   | Dual specificity phosphatase 3                                    | VHR                                                                              |  |

|          |                                                      |                                                                                                                                                           |   |
|----------|------------------------------------------------------|-----------------------------------------------------------------------------------------------------------------------------------------------------------|---|
| DUSP5    | Dual specificity phosphatase 5                       | DUSP, HVH3                                                                                                                                                |   |
| DUSP5P   | Dual specificity phosphatase 5 pseudogene 1          | RP4-621O15.1, DUSP5P                                                                                                                                      |   |
| DUSP6    | Dual specificity phosphatase 6                       | HH19, MKP3, PYST1                                                                                                                                         |   |
| DUSP7    | Dual specificity phosphatase 7                       | MKPX, PYST2                                                                                                                                               |   |
| DUT      | Deoxyuridine triphosphatase                          | dUTPase                                                                                                                                                   |   |
| DVL2     | Dishevelled segment polarity protein 2               |                                                                                                                                                           |   |
| DYM      | Dymeclin                                             | DMC, SMC                                                                                                                                                  |   |
| DYNC1I1  | Dynein, cytoplasmic 1, intermediate chain 1          | DNCI1, DNCIC1                                                                                                                                             |   |
| DYNC1LI2 | Dynein, cytoplasmic 1, light intermediate chain 2    | DNCLI2, LIC2                                                                                                                                              |   |
| DYNC2H1  | Dynein, cytoplasmic 2, heavy chain 1                 | ATD5, DINC10, DINC2, DINC12, DTH1B, SKP32B, SPTD2, hJk-11                                                                                                 |   |
| DYNC2LI1 | Dynein, cytoplasmic 2, light intermediate chain 1    | CGI-60, D2LIC, LIC3                                                                                                                                       |   |
| DYNLRB1  | Dynein, light chain, roadblock-type 1                | HSPC162, BITH, BLP, DNCL2A, DNLC2A, ROBLD1                                                                                                                |   |
| DYRK2    | Dual-specificity tyrosine-(1)-kinase 2               |                                                                                                                                                           |   |
| DYRK3    | Dual-specificity tyrosine-(1)-kinase 3               | RP11-343H5.2, DYRK5, RED, REDK, hYAK3-2                                                                                                                   |   |
| DYSF     | Dysferlin                                            | FER1L1, LGMD2B, MMD1                                                                                                                                      |   |
| DZIP1L   | DAZ interacting zinc finger protein 1-like           | DZIP2                                                                                                                                                     |   |
| DZIP3    | DAZ interacting zinc finger protein 3                | PPP1R66, UURF2, hRUL138                                                                                                                                   |   |
| E2F1     | E2F transcription factor 1                           | E2F-1, RBAP1, RBBP3, RBP3                                                                                                                                 |   |
| E2F2     | E2F transcription factor 2                           | E2F-2                                                                                                                                                     |   |
| E2F5     | E2F transcription factor 5, p130-binding             | E2F-5,                                                                                                                                                    |   |
| E2F6     | E2F transcription factor 6                           | E2F-6,                                                                                                                                                    |   |
| E2F7     | E2F transcription factor 7                           |                                                                                                                                                           |   |
| EAF1     | ELL associated factor 1                              |                                                                                                                                                           |   |
| EAF2     | ELL associated factor 2                              | BM-040, BM040, TRAITS, U19                                                                                                                                |   |
| EBAG9    | Estrogen receptor binding site associated, antigen 9 | EB9, PDAF                                                                                                                                                 |   |
| EBF2     | Early B cell factor 2                                | COE2, EBF-2, O/E-3, OE-3                                                                                                                                  |   |
| EBF3     | Early B-cell factor 3                                | RP11-234G16.3, COE3, EBF-3, O/E-2, OE-2                                                                                                                   |   |
| ECHDC2   | Enoyl CoA hydratase domain containing 2              |                                                                                                                                                           |   |
| ECM1     | Extracellular matrix protein 1                       | RP11-54A4.6, URBWD                                                                                                                                        |   |
| ECT2     | Epithelial cell transforming 2                       | ARHGEF31                                                                                                                                                  |   |
| ECT2L    | Epithelial cell transforming 2 like                  | RP3-30919.3, ANICL152, C00H91, FBAO49, LTD11, RP11-351K23.5, ECTD1, EDT1, EDT1-A1, EDT1-A2-A1, UNQ-2448/PROJ271PROJ4080, EDA-A2K, EDAA2K, TNFRSF27, NEDAB | √ |
| EDA      | Ectodysplasin A                                      |                                                                                                                                                           |   |
| EDA2R    | Ectodysplasin A2 receptor                            |                                                                                                                                                           |   |

|          |                                              |                                                                                                 |   |
|----------|----------------------------------------------|-------------------------------------------------------------------------------------------------|---|
| EDAR     | Ectodysplasin A receptor                     | DL, ECTD10A, ECTD10B, EDTR, EDS, EDS, EDA-A1B, EDA1B, EDA2, IRM1                                |   |
| EDARADD  | EDAR-associated death domain                 | RP4-670F13.1, ECTD11A, ECTD11B, ED3, EDA3                                                       |   |
| EDEM1    | Eik degradation enhancer, mannosidase alpha  | EDEM                                                                                            |   |
| EDEM2    | Eik degradation enhancer, mannosidase alpha  | UNQ573/PRO1135, C20orf31, C20orf49, bA4204.1                                                    |   |
| EDEM3    | Eik degradation enhancer, mannosidase alpha  | C1orf22                                                                                         |   |
| EDN3     | Endothelin 3                                 | RP4-614C15.1, ET-3, ET3, HSCR4, PPET3, WS4B                                                     |   |
| EDNRA    | Endothelin receptor type A                   | ET-A, ETA, ETA-R, ETAR, ETRA, hET-AR                                                            |   |
| EDNRB    | Endothelin receptor type B                   | EDNRB, HSCR, HSCR2, WS4A                                                                        |   |
| EEA1     | Early endosome antigen 1                     | MST105, MSTP105, ZFYVE2                                                                         |   |
| EED      | Embryonic ectoderm development               | HEED, WAIT1                                                                                     |   |
| EEF1A1   | Eukaryotic translation elongation factor 1   | EEF1A1, EEF1A2, CCS-3, CCS3, EEF1A1, EEF-1, EEF1A, EEF1A, EEF1A, CRAE1EF, UNCG16202, LENG7, PTH |   |
| EEF1A1P9 | Eukaryotic translation elongation factor 1   | EEF1AL7                                                                                         |   |
| EEF1DP3  | Eukaryotic translation elongation factor 1   |                                                                                                 |   |
| EEF1E1   | Eukaryotic translation elongation factor 1   | RP3-511E16.1, AIMP3, P18                                                                        |   |
| EEF2K    | Eukaryotic elongation factor-2 kinase        | HSU93850, eEF-2K                                                                                |   |
| EEPDI1   | Endonuclease/exonuclease/phosphatase         | HSPC107                                                                                         |   |
| EFCAB2   | EF-hand calcium binding domain 2             | CFAP200, DRC8                                                                                   |   |
| EFCAB4B  |                                              |                                                                                                 |   |
| EFCAB5   | EF-hand calcium binding domain 5             |                                                                                                 |   |
| EFHA2    |                                              |                                                                                                 |   |
| EFHC1    | EF-hand domain (C-terminal) containing 1     | EJM1, dJ304B14.2                                                                                |   |
| EFHC2    | EF-hand domain (C-terminal) containing 2     | RP11-334D18.1, MRX74, dJ1158H2.1                                                                |   |
| EFNA5    | Ephrin-A5                                    | AF1, EFL5, EPLG7, GLC1M, LERK7, RAGS                                                            |   |
| EFR3B    | EFR3 homolog B ( <i>S. cerevisiae</i> )      | RP11-509E16.1, KIAA0953                                                                         |   |
| EFS      | Embryonal Fyn-associated substrate           | CAS3, CASS31, EFS2, HEFS, SIN, EFS                                                              |   |
| EFTUD2   | Elongation factor Tu GTP binding domain      | EIF2G2, EIF2G1, SNRNP110, Smr110, Smr114, U5-116KD                                              |   |
| EGF      | Epidermal growth factor                      | HOMG4, URG                                                                                      |   |
| EGFLAM   | EGF-like, fibronectin type III and laminin G | AGRINL, AGRNL, PIKA                                                                             |   |
| EGFR     | Epidermal growth factor receptor             | ERBB, ERBB1, HER1, PIG61, mENA                                                                  | v |
| EGLN1    | Egl-9 family hypoxia-inducible factor 1      | FNAS-118, C10H12, ECT13, HIF-1H2, HIF1H2, HIF1-2, HIF2, HIF2, SM20, ZMYND6                      |   |
| EGLN2    | Egl-9 family hypoxia-inducible factor 2      | EIT6, HIF-PH1, HIFPH1, HPH-1, HPH-3, PHD1                                                       |   |
| EGR1     | Early growth response 1                      | AT225, G0350, KROX-24, NG1FA, T158, ZNF208, ZNF225                                              |   |
| EGR2     | Early growth response 2                      | AT591, CMT1D, CMT4E, KROX20                                                                     |   |

|          |                                                                       |                                                       |   |
|----------|-----------------------------------------------------------------------|-------------------------------------------------------|---|
| EGR3     | Early growth response 3                                               | EGR-3, PILOT                                          |   |
| EHBP1    | EH domain binding protein 1                                           | HPC12, NACSIN                                         |   |
| EHD1     | EH-domain containing 1                                                | CDABP0131, H-PAST, HPAST1, PAST, PAST1                |   |
| EHF      | Ets homologous factor                                                 | ESE3, ESE3B, ESEJ                                     |   |
| EHHADH   | Ethanol dehydrogenase                                                 | ECHD, FRST3, L-PBE, LBFP, LBP, PBFE                   |   |
| EI24     | Etoposide induced 2.4                                                 | EPG4, PIG8, TP53I8                                    |   |
| EID1     | E1500 interacting inhibitor of differentiation 1                      | FNAS-22, C150H5, CK11, EID-1, IKO45020, PTD014, RDD31 |   |
| EIF1     | Eukaryotic translation initiation factor 1                            | A121, EIF-1A, ISO1, SUI1, EIF1                        |   |
| EIF1AX   | Eukaryotic translation initiation factor 1A, alpha                    | RI11-595110.1, EIF1A, EIF1A1, EIF4C, EIF-1A, EIF-4C   |   |
| EIF1AY   | Eukaryotic translation initiation factor 1A, gamma                    | eIF-4C                                                |   |
| EIF2A    | Eukaryotic translation initiation factor 2A                           | CDA02, EIF-2A, MST089, MSTP004, MSTP089               |   |
| EIF2AK1  | Eukaryotic translation initiation factor 2A kinase 1                  | PRO1362, HCR, HRI                                     |   |
| EIF2AK4  | Eukaryotic translation initiation factor 2A kinase 4                  | GCN2, PVOD2                                           |   |
| EIF2B2   | Eukaryotic translation initiation factor 2B, subunit 2                | EIF-2Bbeta, EIF2B                                     |   |
| EIF2B5   | Eukaryotic translation initiation factor 2B, subunit 5, similar to 2B | CACH, CLE, EIF-2B, EIF2Bepsilon, LVWM                 |   |
| EIF2C1   |                                                                       |                                                       |   |
| EIF2C4   |                                                                       |                                                       |   |
| EIF2S3   | Eukaryotic translation initiation factor 2, subunit 3                 | EIF2, EIF2G, EIF2gamma, eIF-2gA                       |   |
| EIF3B    | Eukaryotic translation initiation factor 3, subunit B                 | EIF3-ETA, EIF3-P110, EIF3-P116, EIF3S9, PRT1          |   |
| EIF3D    | Eukaryotic translation initiation factor 3, subunit D                 | RP5-1119A7.12-003, EIF3S7, eIF3-p66, eIF3-zeta        |   |
| EIF4A2   | Eukaryotic translation initiation factor 4A2                          | BM-010, DDX2B, EIF4A, EIF4F, eIF-4A-II, eIF4A-II      | v |
| EIF4E2   | Eukaryotic translation initiation factor 4E, subunit 2                | 4E-LP, 4EHP, EIF4EL3, IF4e                            |   |
| EIF4E3   | Eukaryotic translation initiation factor 4E, subunit 3                | eIF-4E3, eIF4E-3                                      |   |
| EIF4EBP2 | Eukaryotic translation initiation factor 4E binding protein 2         | 4EBP2, PHASII                                         |   |
| EIF4H    | Eukaryotic translation initiation factor 4H                           | WBSCR1, WSCR1, eIF-4H                                 |   |
| EIF5     | Eukaryotic translation initiation factor 5                            | EIF-5, EIF-5A                                         |   |
| EIF5A2   | Eukaryotic translation initiation factor 5A2                          | EIF-5A2, eIF5AII                                      |   |
| EIF5AL1  | Eukaryotic translation initiation factor 5A-like 1                    | RP11-342M3.3, EIF5AP1, bA342M3.3                      |   |
| ELAC1    | ElaC ribonuclease Z 1                                                 | D29                                                   |   |
| ELAVL1   | ELAV like RNA binding protein 1                                       | ELAV1, HUR, Hua, MeIG                                 |   |
| ELAVL2   | ELAV like neuron-specific RNA binding protein 2                       | RP11-315I14.4, HEL-N1, HELN1, HUB                     |   |
| ELAVL3   | ELAV like neuron-specific RNA binding protein 3                       | HUC, HUCL, PLE21                                      |   |
| ELAVL4   | ELAV like neuron-specific RNA binding protein 4                       | HUD, PNEM                                             |   |



|        |                                                                 |                                                              |   |
|--------|-----------------------------------------------------------------|--------------------------------------------------------------|---|
| ELF2   | E74-like factor 2 (ets domain transcription factor)             | EC52, NERF, NERF-1A, NERF-1B, NERF-1a,b, NERF-2              |   |
| ELF5   | E74-like factor 5 (ets domain transcription factor)             | ESE2                                                         |   |
| ELK1   | ELK1, member of ETS oncogene family                             |                                                              |   |
| ELK3   | ELK3, ETS-domain protein (SH1 accessory protein 3)              | ERP, NET, SAP2                                               |   |
| ELL2   | Elongation factor, RNA polymerase II, 2                         |                                                              |   |
| ELMOD3 | ELMO/CED-12 domain containing 3                                 | PP4068, DFNB88, LST3, RBED1, RBM29                           |   |
| ELN    | Elastin                                                         | SVAS, WBS, WS                                                | √ |
| ELOVL2 | ELOVL fatty acid elongase 2                                     | SSC2                                                         |   |
| ELOVL5 | ELOVL fatty acid elongase 5                                     | RP3-483K16.1, HELO1, SCA38, dJ483K16.1                       |   |
| ELOVL6 | ELOVL fatty acid elongase 6                                     | Lce2, rELO2                                                  |   |
| ELP2P  |                                                                 |                                                              |   |
| ELTD1  | EGR, ratropin and seven transmembrane domain containing 1       | hCG_14667, ETL, KPG_003                                      |   |
| EMB    | Embigin                                                         | GP70                                                         |   |
| EMG1   | EMG1 N1-specific pseudouridine                                  | C2F, Grcc2f, NEP1                                            |   |
| EML1   | Ectoderm microtubule associated protein 1                       | ELP79, EMAP, EMAPL, HuEMAP                                   |   |
| EML4   | Ectoderm microtubule associated protein 4                       | C2orf2, ELP120, EMAP-4, EMAPL4, ROPP120                      | √ |
| EML6   | Ectoderm microtubule associated protein 6                       |                                                              |   |
| EMP2   | Epithelial membrane protein 2                                   | NPHS10, XMP                                                  |   |
| EMR1   | Egr-like module containing, mucin-like, hormone receptor like 2 | TM7LN3                                                       |   |
| EMR2   | Egr-like module containing, mucin-like, hormone receptor like 2 | CD312                                                        |   |
| EMX2   | Empty spiracles homeobox 2                                      |                                                              |   |
| EN1    | Engrailed homeobox 1                                            |                                                              |   |
| EN2    | Engrailed homeobox 2                                            | tcag7.568                                                    |   |
| ENAH   | Enabled homolog (Drosophila)                                    | RP11-496N12.7, ENA, MENA, NDPP1                              |   |
| ENDOD1 | Endonuclease domain containing 1                                |                                                              |   |
| ENOX2  | Ecto-NOX disulfide-thiol exchanger 2                            | RP5-875H3.1, APK1, COVA1, tNOX                               |   |
| ENPP1  | Ectonucleotide disphosphatase/cholesterol esterase 1            | ANKK2, COLLED, MOST, NPT1, NPT5, PC-1, PCAT, PDND1           |   |
| ENPP5  | Ectonucleotide disphosphatase/cholesterol esterase 5            | UNQ550/PRO1107, NPP-5                                        |   |
| ENPP6  | Ectonucleotide disphosphatase/cholesterol esterase 6            | UNQ1889/PRO4334, NPP6                                        |   |
| ENSA   | Endosulfine alpha                                               | RP11-54A4.10-004, ARPP-19e                                   |   |
| ENTPD1 | Ectonucleoside triphosphate diphosphohydrolase 1                | ATPDase, CD39, NTPDase-1, SPG64                              |   |
| ENTPD4 | Ectonucleoside triphosphate diphosphohydrolase 4                | LALP70, LAP70, LYSAL1, NTPDase-4, UDPase                     |   |
| ENTPD6 | Ectonucleoside triphosphate diphosphohydrolase 6                | NT 7-758115.3, CD39L2, IL-6SAG, IL0312, NTPDase-6, H728D15.2 |   |

|          |                                                                  |                                                                                       |   |
|----------|------------------------------------------------------------------|---------------------------------------------------------------------------------------|---|
| ENTPD7   | Ectonucleoside triphosphate diphosphohydrolase 7                 | RP11-483F11.1, LALP1                                                                  |   |
| ENY2     | Enhancer of yellow 2 homolog (Drosophila)                        | DC6, e(y)2                                                                            |   |
| EP400    | E1A binding protein p400                                         | CAGH32, P400, TNRC12                                                                  |   |
| EPB41    | Erythrocyte membrane protein band 4.1                            | RP11-242O24.1, 4.1R, EL1, HE                                                          |   |
| EPB41L3  | Erythrocyte membrane protein band 4.1-like 3                     | 4.1B, DAL-1, DAL1                                                                     |   |
| EPB41L4A | Erythrocyte membrane protein band 4.1-like 4A                    | EPB41L4, NBL4                                                                         |   |
| EPB41L4B | Erythrocyte membrane protein band 4.1-like 4B                    | CG1, EHM2                                                                             |   |
| EPB41L5  | Erythrocyte membrane protein band 4.1-like 5                     | BE37, YMO1                                                                            |   |
| EPB49    |                                                                  |                                                                                       |   |
| EPC2     | Enhancer of polycomb homolog 2 (Drosophila)                      | EPC-LIKE                                                                              |   |
| EPDR1    | Ependymin related 1                                              | EPDR, MERP-1, MERP1, UCC1                                                             |   |
| EPGN     | Epithelial mitogen                                               | UNQ3072, ALGV3072, EPG, PRO9904                                                       |   |
| EPHA2    | EPH receptor A2                                                  | ARCC2, CTPA, CTPP1, CTRCT6, ECK                                                       |   |
| EPHA3    | EPH receptor A3                                                  | EK4, ETK, ETK1, HEK, HEK4, TYRO4                                                      |   |
| EPHA4    | EPH receptor A4                                                  | HEK8, SEK, TYRO1                                                                      |   |
| EPHA5    | EPH receptor A5                                                  | CEK7, EHK-1, EHK1, EK7, HEK7, TYRO4                                                   |   |
| EPHA7    | EPH receptor A7                                                  | EHK-3, EHK3, EK11, HEK11                                                              |   |
| EPHB1    | EPH receptor B1                                                  | ELK, EPHT2, Hek6, NET                                                                 |   |
| EPHB2    | EPH receptor B2                                                  | CAPB, DRT, EK5, EPHT3, ERK, Hek5, PCBC, Tyro5                                         |   |
| EPM2A    | Epilepsy, progressive myoclonus type 2A, Lafora disease (Lafora) | RP1-28C20.2, EPM2, MELF                                                               |   |
| EPM2AIP1 | EPM2A (laforin) interacting protein 1                            | My007                                                                                 |   |
| EPN2     | Epsin 2                                                          | EHB21                                                                                 |   |
| EPS15    | Epidermal growth factor receptor pathway protein 15              | AF-1P, AF1P, MLLT5                                                                    | v |
| EPS15L1  | Epidermal growth factor receptor pathway protein 15L1            | EPS15R                                                                                |   |
| EPS8     | Epidermal growth factor receptor pathway protein 8               | DFNB102                                                                               |   |
| EPT1     | Endothelinreceptor-specific phosphatase 1 (CD11b-related)        | SELI, SEPI                                                                            |   |
| ERAP1    | Endoplasmic reticulum aminopeptidase 1                           | UNQ364/TKO1134, A-LAP, ALAP, APPLS, ARTS-1, ARTS1, ERA-AP, ERA-AP1, PILS-AP, PILS-AP1 |   |
| ERAP2    | Endoplasmic reticulum aminopeptidase 2                           | L-RAP, LRAP                                                                           |   |
| ERAS     | ES cell expressed Ras                                            | HRAS2, HRASP                                                                          |   |
| ERBB4    | v-crb-b2 avian erythroblastic leukemia viral oncogene homolog 4  | ALS19, HER4, p180erbB4                                                                |   |
| ERC1     | ELKS/RAB6-interacting/CAST family member 1                       | Cast2, ELKS, ERC-1, RAB6IP2                                                           |   |
| ERC2     | ELKS/RAB6-interacting/CAST family member 2                       | CAST, CAST1, ELKSL, SPBC110, Spc110                                                   |   |
| ERCC6    | Excision repair cross-complementation group 6                    | ARMD5, CKN2, COFS, COFS1, CSB, RAD26, UVSS1                                           |   |

|          |                                                                |                                                                         |   |
|----------|----------------------------------------------------------------|-------------------------------------------------------------------------|---|
| ERCC6L   | Excision repair cross-complementation group 6 like             | PICH, RAD26L                                                            |   |
| EREG     | Epiregulin                                                     | ER                                                                      |   |
| ERF      | Ets2 repressor factor                                          | CRS4, PE-2, PE2                                                         |   |
| ERG      | v-ets avian erythroblastosis virus E2O                         | erg-3, p55                                                              | v |
| ERGIC1   | Endoplasmic reticulum-golgi intermediate compartment (ERGIC) 1 | HT034, ERGIC-32, ERGIC32, NET24                                         |   |
| ERI1     | Exoribonuclease 1                                              | 3'HEXO, HEXO, THEX1                                                     |   |
| ERICH1   | Glutamate-rich 1                                               | HSPC319                                                                 |   |
| ERLIN1   | ER lipid raft associated 1                                     | KFTT-5T0M21.1, C100H09, ERM1-1, KEO4, KEO4, SPFH, SPG62                 |   |
| ERLIN2   | ER lipid raft associated 2                                     | UNQ2441, C8orf2, Erlin-2, NET32, SPFH2, SPG18                           |   |
| ERMAP    | Erythroblast membrane-associated protein (Science blood group) | BTN5, PRO2801, RD, SC                                                   |   |
| ERMN     | Ermin, ERM-like protein                                        | JN, KIAA1189, ermin                                                     |   |
| ERO1L    | ERO1-like ( <i>S. cerevisiae</i> )                             | UNQ434/PRO865, ERO1-alpha, ERO1AA, ERO1L                                |   |
| ERO1LB   | ERO1-like beta ( <i>S. cerevisiae</i> )                        | RP5-985L19.2                                                            |   |
| ERP44    | Endoplasmic reticulum protein 44                               | UNQ532/PRO1075, PDIA10, TXNDC4                                          |   |
| ERVFRDE1 | Endogenous retrovirus group FRD, member 1                      | UNQ0191/PRO20218, ERVFRDE1, GLL0191, HERV-ERD, HERV-W/ERD, UNQ4101, ERD |   |
| ESCO2    | Establishment of sister chromatid cohesion 2                   | 2410004I17Rik, EFO2, RBS                                                |   |
| ESD      | Esterase D                                                     | RP11-147L20.1, FGH                                                      |   |
| ESM1     | Endothelial cell-specific molecule 1                           | endocan                                                                 |   |
| ESPNL    | Espin-like                                                     | UNQ3125                                                                 |   |
| ESR1     | Estrogen receptor 1                                            | RP1-130E4.1, ER, ESR, ESRA, ESTRR, Era, NR3A1                           |   |
| ESR2     | Estrogen receptor 2 (ER beta)                                  | ER-BETA, ESR-BETA, ESRB, ESTRB, Erb, NR3A2                              |   |
| ESRP1    | Epithelial splicing regulatory protein 1                       | RBM35A, RMB35A                                                          |   |
| ESRP2    | Epithelial splicing regulatory protein 2                       | PP7059, RBM35B                                                          |   |
| ESRRG    | Estrogen-related receptor gamma                                | ERR3, ERRgamma, NR3B3                                                   |   |
| ESYT3    | Extended synaptotagmin-like protein 3                          | CHR3SYT, E-Syt3, FAM62C                                                 |   |
| ETF1     | Eukaryotic translation termination factor 1                    | D5S1995, ERF, ERF1, RF1, SUP45L1, TB3-1                                 |   |
| ETFDH    | Erection-transferring-navoprotein 1                            | ETFQO, MADD                                                             |   |
| ETNK1    | Ethanolamine kinase 1                                          | EKI, EK1, EK11, Nbla10396                                               |   |
| ETS1     | v-ets avian erythroblastosis virus E2O                         | ETS-1, EWSR2, p54                                                       |   |
| ETV1     | Ets variant 1                                                  | ER81                                                                    | v |
| ETV3L    | Ets variant 3-like                                             |                                                                         |   |
| ETV6     | Ets variant 6                                                  | TEL, TEL/ABL                                                            | v |
| EVC      | Ellis van Creveld syndrome                                     | DWF-11, EVCL, EVC                                                       |   |

|         |                                                           |                                                                                                     |   |
|---------|-----------------------------------------------------------|-----------------------------------------------------------------------------------------------------|---|
| EVI2A   | Ecotropic viral integration site 2A                       | EVDA, EVI-2A, EVI2                                                                                  |   |
| EVI5    | Ecotropic viral integration site 5                        | NB4S                                                                                                |   |
| EVL     | Enah/Vasp-like                                            | RNB6                                                                                                |   |
| EXD1    | Exonuclease 3'-5' domain containing 1                     | EXDL1                                                                                               |   |
| EXO1    | Exonuclease 1                                             | RP11-553N16.2, HEX1, hExoI                                                                          |   |
| EXOC2   | Exocyst complex component 2                               | RP11-164H16.2, SEC5, SEC5L1, Sec5p                                                                  |   |
| EXOC4   | Exocyst complex component 4                               | tcag7.1185, SEC8, SEC8L1, Sec8p                                                                     |   |
| EXOC5   | Exocyst complex component 5                               | HSEC10, PRO1912, SEC10, SEC10L1, SEC10P                                                             |   |
| EXOC6   | Exocyst complex component 6                               | RP11-346J12.4A, SEC15, SEC15L, SEC15L1, SEC15L3, Sec15p, EXOC6                                      |   |
| EXOC8   | Exocyst complex component 8                               | EXO84, Exo84p, SEC84                                                                                |   |
| EXOSC10 | Exosome component 10                                      | PM3C1, PM3C1-100, PM3C1L, PM3C1L2, RRP10, Rrp10p, R2p2.2.4                                          |   |
| EXOSC2  | Exosome component 2                                       | RP11-57C19.4, RRP4, Rrp4p, hRrp4p, p7                                                               |   |
| EXOSC3  | Exosome component 3                                       | CGI-102, FC11B, RRP40, Rrp40p, D45J10.1, mRrp40, p10                                                |   |
| EXOSC6  | Exosome component 6                                       | EAP4, MTR3, Mtr3p, hMtr3p, p11                                                                      |   |
| EXPH5   | Exophilin 5                                               | SLAC2-B, SLAC2B                                                                                     |   |
| EXT2    | Exostosin glycosyltransferase 2                           | SOTV                                                                                                | √ |
| EXTL2   | Exostosin-like glycosyltransferase 2                      | EXTR2                                                                                               |   |
| EXTL3   | Exostosin-like glycosyltransferase 3                      | BOTV, EXTL1L, EXTR1, REGR, RPR                                                                      |   |
| EYA1    | EYA transcriptional coactivator and phosphatase 1         | BOP, BOR, BOS1, OFC1                                                                                |   |
| EYA4    | EYA transcriptional coactivator and phosphatase 4         | RP11-704J17.4, CMD1J, DFNA10                                                                        |   |
| EYS     | Eyes shut homolog (Drosophila)                            | RP1-22H7.2, COOH178, COOH179, COOH180, EGFL10, ENX-1, ENX1, EZH10, KMT16, KMT16A, WVS3, WVSZ, EZH10 |   |
| EZH2    | Enhancer of zeste 2 polycomb repressive complex 2 subunit | ENX-1, ENX1, EZH10, KMT16, KMT16A, WVS3, WVSZ, EZH10                                                | √ |
| F11     | Coagulation factor XI                                     | FXI                                                                                                 |   |
| F11R    | F11 receptor                                              | RP11-344M22.2, CD521, JAM1, JAM1L, JAMA, JCAM, KAT, DAM1                                            |   |
| F13A1   | Coagulation factor XIII, A1 polypeptide                   | RP11-232H4.1, F13A                                                                                  |   |
| F13B    | Coagulation factor XIII, B polypeptide                    | FXIIIB                                                                                              |   |
| F2R     | Coagulation factor II (thrombin) receptor                 | CF2R, HTR, PAR-1, PAR1, TR                                                                          |   |
| F2RL3   | Coagulation factor II (thrombin) receptor-like 3          | PAR4                                                                                                |   |
| F5      | Coagulation factor V (proaccelerin, labile factor)        | FVL, PCCF, RPRGL1, THPH2                                                                            |   |
| FABP2   | Fatty acid binding protein 2, intestinal                  | FABPI, I-FABP                                                                                       |   |
| FABP7   | Fatty acid binding protein 7, brain                       | RP11-548E19.1, B-FABP, BLBP, FABPB, MRG                                                             |   |
| FADS1   | Fatty acid desaturase 1                                   | D5D, FADS6, FADSD5, LLCDL1, TU12                                                                    |   |
| FADS2   | Fatty acid desaturase 2                                   | D6D, DES6, FADSD6, LLCDL2, SLL0262, TU13                                                            |   |

|           |                                                         |                                                    |  |
|-----------|---------------------------------------------------------|----------------------------------------------------|--|
| FAM1      | Fas apoptotic inhibitory molecule                       | FAM1                                               |  |
| FAM2      | Fas apoptotic inhibitory molecule 2                     | LFG, LFG2, NGP35, NMP35, TMBIM2                    |  |
| FAM3      | Fas apoptotic inhibitory molecule 3                     | FCMR, TOSO                                         |  |
| FAM100A   |                                                         |                                                    |  |
| FAM100B   |                                                         |                                                    |  |
| FAM101B   | family with sequence similarity 101,<br>member D        | CFM1                                               |  |
| FAM102A   | family with sequence similarity 102,<br>member A        | RP11-203J24.7, C9orf132, EEIG1, SYM-3A, bA203J24.7 |  |
| FAM102B   | family with sequence similarity 102,<br>member B        | RP11-256E16.1, SYM-3B                              |  |
| FAM104A   | family with sequence similarity 104,<br>member A        |                                                    |  |
| FAM104B   | family with sequence similarity 104,<br>member B        | RP11-266I3.4, CXorf44                              |  |
| FAM105A   | family with sequence similarity 105,<br>member A        | NET20                                              |  |
| FAM105B   |                                                         |                                                    |  |
| FAM107A   | family with sequence similarity 107,<br>member A        | DRR1, TU3A                                         |  |
| FAM107B   | family with sequence similarity 107,<br>member B        | RP11-153L18.1, C10orf45                            |  |
| FAM108B1  |                                                         |                                                    |  |
| FAM108C1  |                                                         |                                                    |  |
| FAM109B   | family with sequence similarity 109,<br>member B        | CTA-250D10.2, IPIP27B, Ses2                        |  |
| FAM110B   | family with sequence similarity 110,<br>member B        | C8orf72                                            |  |
| FAM114A2  | family with sequence similarity 114,<br>member A        | 133K02, C5orf3                                     |  |
| FAM115C   | family with sequence similarity 115,<br>member C        | FAM139A                                            |  |
| FAM116A   |                                                         |                                                    |  |
| FAM117A   | family with sequence similarity 117,<br>member A        |                                                    |  |
| FAM117B   | family with sequence similarity 117,<br>member B        | ALS2CR13                                           |  |
| FAM118A   | family with sequence similarity 118,<br>member A        | CTA-268H5.11-003, C22orf8                          |  |
| FAM118B   | family with sequence similarity 118,<br>member B        |                                                    |  |
| FAM119A   |                                                         |                                                    |  |
| FAM119B   |                                                         |                                                    |  |
| FAM120A   | Family with sequence similarity 120A                    | C9orf10, DNAPTP1, DNAPTP5, OSSA                    |  |
| FAM120AOS | family with sequence similarity 120A<br>opposite strand | RP11-165J3.1, C9orf10OS                            |  |
| FAM120B   | Family with sequence similarity 120B                    | CCPG, KIAA1838, PGCC1, dJ894D12.1                  |  |
| FAM120C   | Family with sequence similarity 120C                    | RP11-161N3.2, CXorf17, ORF34                       |  |
| FAM122A   | Family with sequence similarity 122A                    | C9orf42                                            |  |
| FAM122B   | Family with sequence similarity 122B                    | RP11-308B5.5, SPACIA2                              |  |

|          |                                              |                                    |  |
|----------|----------------------------------------------|------------------------------------|--|
| FAM123B  |                                              |                                    |  |
| FAM124B  | Family with sequence similarity 124B         |                                    |  |
| FAM125B  |                                              |                                    |  |
| FAM126B  | family with sequence similarity 126,         | HYCC2                              |  |
| FAM129C  | family with sequence similarity 129,         | BCNP1                              |  |
| FAM131B  | family with sequence similarity 131,         |                                    |  |
| FAM133A  | family with sequence similarity 133,         | RP1-32F7.2, CT115                  |  |
| FAM133B  | family with sequence similarity 133,         | RP1-32F7.2, CT115                  |  |
| FAM134C  | family with sequence similarity 134,         |                                    |  |
| FAM135A  | family with sequence similarity 135,         | RP1-198I9.1, KIAA1411              |  |
| FAM135B  | family with sequence similarity 135,         | RP1-198I9.1, KIAA1411              |  |
| FAM13A   | family with sequence similarity 13, member A | ARHGAP481, FAM13A                  |  |
| FAM13AOS |                                              |                                    |  |
| FAM13B   | family with sequence similarity 13, member B | ARHGAP49, C5orf51, KH              |  |
| FAM149A  | family with sequence similarity 149,         | AW213256, mKIAA4166                |  |
| FAM150A  | family with sequence similarity 150,         | EG620393                           |  |
| FAM153B  | family with sequence similarity 153,         |                                    |  |
| FAM153C  | family with sequence similarity 153,         | NY-REN-7-like                      |  |
| FAM155B  | family with sequence similarity 155,         | CXorf63, TED, TMEM28, bB57D9.1     |  |
| FAM156A  | family with sequence similarity 156,         | RP1-248F5.1, PRO0659, TMEM29       |  |
| FAM156B  | family with sequence similarity 156,         | PP12994, TMEM29B                   |  |
| FAM159A  | family with sequence similarity 159,         | UNQ2783/PRO7171, PRO7171, WWLS2783 |  |
| FAM160A1 | family with sequence similarity 160,         |                                    |  |
| FAM160A2 | family with sequence similarity 160,         | C11orf56                           |  |
| FAM163A  | family with sequence similarity 163,         | RP11-12M5.2, C1orf76, NDSP         |  |
| FAM164A  | family with sequence similarity 164,         | C8orf70, ZC2HC1A                   |  |
| FAM167A  | family with sequence similarity 167,         | C8orf13, D8S265                    |  |
| FAM168A  | family with sequence similarity 168,         | KIAA0280, TCRP1                    |  |
| FAM168B  | family with sequence similarity 168,         | MANI                               |  |
| FAM169A  | family with sequence similarity 169,         | SLAP75                             |  |
| FAM169B  | family with sequence similarity 169,         |                                    |  |
| FAM171A1 | family with sequence similarity 171,         | RP11-455B2.10-002, C10orf38        |  |
| FAM172A  | family with sequence similarity 172,         | C5orf21                            |  |

|          |                                               |                                                |  |
|----------|-----------------------------------------------|------------------------------------------------|--|
| FAM174A  | Family with sequence similarity 174,          | UNQ1912/PRO4371, TMEM157, UNQ1912              |  |
| FAM175B  | Family with sequence similarity 175,          | ABRO1, KIAA0157                                |  |
| FAM177A1 | Family with sequence similarity 177,          | C14orf24                                       |  |
| FAM178A  | Family with sequence similarity 178,          | C10orf6                                        |  |
| FAM179B  | Family with sequence similarity 179,          | KIAA0423                                       |  |
| FAM182A  | Family with sequence similarity 182,          | RP13-329D4.5, C20orf91, bB329D4.1              |  |
| FAM185A  | Family with sequence similarity 185,          |                                                |  |
| FAM189A1 | Family with sequence similarity 189,          | TMEM228                                        |  |
| FAM189B  | Family with sequence similarity 189,          | C1orf2, COTE1                                  |  |
| FAM18A   | Family with sequence similarity 18, member 1  | YDR084C                                        |  |
| FAM18B2  | Family with sequence similarity 18, member 2  |                                                |  |
| FAM190A  | Family with sequence similarity 190,          |                                                |  |
| FAM190B  | Family with sequence similarity 190,          | BOS_24114                                      |  |
| FAM192A  | Family with sequence similarity 192,          | CDA10, C16orf94, CDA018, NIP30                 |  |
| FAM193A  | Family with sequence similarity 193, member 1 | RES4-22, C4orf8                                |  |
| FAM195A  | Family with sequence similarity 195, member 1 | C16orf14, c349E10.1                            |  |
| FAM198A  | Family with sequence similarity 198, member 1 | C3orf41                                        |  |
| FAM198B  | Family with sequence similarity 198, member 2 | AD021, AD036, C4orf18                          |  |
| FAM19A2  | Family with sequence similarity 19-like 2     | TAFA-2, TAFA2                                  |  |
| FAM19A3  | Family with sequence similarity 19-like 3     | RP11-426L16.6, TAFA-3, TAFA3                   |  |
| FAM20B   | Family with sequence similarity 20, member 1  | RP11-177A2.1, gxk1                             |  |
| FAM22D   | Family with sequence similarity 22, member 1  |                                                |  |
| FAM22G   | Family with sequence similarity 22, member 2  |                                                |  |
| FAM23A   | Family with sequence similarity 23, member 1  | bA16O1.2                                       |  |
| FAM23B   | Family with sequence similarity 23, member 2  | bA16I21.2                                      |  |
| FAM24A   | Family with sequence similarity 24, member 1  |                                                |  |
| FAM26D   | Family with sequence similarity 26, member 1  | RP3-493F7.4, C6orf78                           |  |
| FAM26E   | Family with sequence similarity 26, member 2  | RP3-493F7.3, C6orf188, dJ493F7.3               |  |
| FAM27L   | Family with sequence similarity 27-like       |                                                |  |
| FAM35B   | Family with sequence similarity 35, member 1  |                                                |  |
| FAM35B2  | Family with sequence similarity 35, member 2  |                                                |  |
| FAM38B   | Family with sequence similarity 38, member 1  |                                                |  |
| FAM3B    | Family with sequence similarity 3, member 1   | PRED44, 2-21, C21orf11, C21orf76, ORF9, PANDER |  |

|          |                                              |                                   |   |
|----------|----------------------------------------------|-----------------------------------|---|
| FAM3C    | Family with sequence similarity 3, member 1  | GS3786, ILEI                      |   |
| FAM3D    | Family with sequence similarity 3, member 2  | UNQ567/PRO1130, EF7, OIT1         |   |
| FAM40B   | Family with sequence similarity 40, member 1 | STRIP2                            |   |
| FAM41AY2 | Family with sequence similarity 41, member 2 |                                   |   |
| FAM43A   | Family with sequence similarity 43, member 1 | PP7298                            |   |
| FAM45A   | Family with sequence similarity 45, member 1 |                                   |   |
| FAM46A   | Family with sequence similarity 46, member 1 | RP1-300G12.3, C6orf37, XTP11      |   |
| FAM46B   | Family with sequence similarity 46, member 2 | RP11-344H11.8                     |   |
| FAM46C   | Family with sequence similarity 46, member 3 |                                   | v |
| FAM46D   | Family with sequence similarity 46, member 4 | CT1.26, CT112                     |   |
| FAM47B   | Family with sequence similarity 47, member 1 | RP13-520K9.1                      |   |
| FAM47C   | Family with sequence similarity 47, member 2 | RP11-31H15.5                      |   |
| FAM47E   | Family with sequence similarity 47, member 4 | hCG_23000                         |   |
| FAM48A   | Family with sequence similarity 48, member 1 | BOS_12357                         |   |
| FAM53B   | Family with sequence similarity 53, member 1 | RP11-12J10.2, KIAA0140, bA12J10.2 |   |
| FAM54B   | Family with sequence similarity 54, member 1 |                                   |   |
| FAM55C   | Family with sequence similarity 55, member 1 | EGK_11249                         |   |
| FAM57B   | Family with sequence similarity 57, member 1 | FP1188                            |   |
| FAM58A   | Family with sequence similarity 58, member 1 | STAR                              |   |
| FAM59A   | Family with sequence similarity 59, member 1 |                                   |   |
| FAM5B    | Family with sequence similarity 5, member 1  | EGK_01993                         |   |
| FAM5C    | Family with sequence similarity 5, member 2  | BOS_15614                         |   |
| FAM63A   | Family with sequence similarity 63, member 1 | RP11-316M1.5                      |   |
| FAM63B   | Family with sequence similarity 63, member 2 |                                   |   |
| FAM66C   | Family with sequence similarity 66, member 1 |                                   |   |
| FAM66D   | Family with sequence similarity 66, member 2 |                                   |   |
| FAM66E   | Family with sequence similarity 66, member 3 |                                   |   |
| FAM70A   | Family with sequence similarity 70, member 1 | EGK_20885                         |   |
| FAM71C   | Family with sequence similarity 71, member 1 |                                   |   |
| FAM71D   | Family with sequence similarity 71, member 2 | C14orf54                          |   |
| FAM71E2  | Family with sequence similarity 71, member 3 | C19orf16                          |   |
| FAM71F1  | Family with sequence similarity 71, member 4 | FAM137A, NYD-SP18                 |   |
| FAM72D   | Family with sequence similarity 72, member 1 | WI2-929E21.1, GCU2                |   |



|         |                                              |                                                              |   |
|---------|----------------------------------------------|--------------------------------------------------------------|---|
| FAM73A  | Family with sequence similarity 73, member 1 |                                                              |   |
| FAM73B  | Family with sequence similarity 73, member 2 | RP11-167N5.1, C9orf54                                        |   |
| FAM76A  | Family with sequence similarity 76, member 1 | RP3-426I6.1                                                  |   |
| FAM76B  | Family with sequence similarity 76, member 2 |                                                              |   |
| FAM81A  | Family with sequence similarity 81, member 1 |                                                              |   |
| FAM81B  | Family with sequence similarity 81, member 2 |                                                              |   |
| FAM82B  | Family with sequence similarity 82, member 2 |                                                              |   |
| FAM84A  | Family with sequence similarity 84, member 1 | NSE1, PP11517                                                |   |
| FAM85A  | Family with sequence similarity 85, member 1 |                                                              |   |
| FAM86A  | Family with sequence similarity 86, member 1 | SB153                                                        |   |
| FAM86B1 | Family with sequence similarity 86, member 1 |                                                              |   |
| FAM86B2 | Family with sequence similarity 86, member 2 |                                                              |   |
| FAM86C  | Family with sequence similarity 86, member 3 | FAM86C                                                       |   |
| FAM86D  | Family with sequence similarity 86, member 4 |                                                              |   |
| FAM89A  | Family with sequence similarity 89, member 1 | RP11-423F24.2, C1orf153                                      |   |
| FAM90A1 | Family with sequence similarity 90, member 1 |                                                              |   |
| FAM91A1 | Family with sequence similarity 91, member 1 |                                                              |   |
| FAM91A2 | Family with sequence similarity 91, member 2 |                                                              |   |
| FAM95B1 | Family with sequence similarity 95, member 1 | RP11-146D12.4                                                |   |
| FAM96A  | Family with sequence similarity 96, member 1 |                                                              |   |
| FAM99A  | Family with sequence similarity 99, member 1 |                                                              |   |
| FAM9C   | Family with sequence similarity 9, member 1  | TEX39C                                                       |   |
| FANCA   | Fanconi anemia, complementation group A      | FA, FA-H, FA1, FAA, FACA, FAH, FANCH                         | √ |
| FANCD2  | Fanconi anemia, complementation group D2     | FA-D2, FA4, FACD, FAD, FAD2, FANCD                           | √ |
| FANCF   | Fanconi anemia, complementation group F      | FAF                                                          | √ |
| FANCG   | Fanconi anemia, complementation group G      | FAG, XRCC9                                                   | √ |
| FANCI   | Fanconi anemia, complementation group I      | KIAA1794                                                     |   |
| FANCM   | Fanconi anemia, complementation group M      | FAAP250, KIAA1596                                            |   |
| FAR1    | Fatty acyl CoA reductase 1                   | UNQ2423/PRO4981, MLSTD2, SDR10E1                             |   |
| FAS     | Fas cell surface death receptor              | RP11-399O19.7, ALPS1A, APO-1, APT1, CD95, FASL, TNFRSF6, FAS | √ |
| FASLG   | Fas ligand (TNF superfamily, member 6)       | FASL, TNFSF6, APTL, CD178, CD95L, CD95L, FASL, TNFSF6        |   |
| FASTKD1 | FAST kinase domains 1                        |                                                              |   |
| FASTKD2 | FAST kinase domains 2                        | KIAA0971                                                     |   |

|         |                                                                            |                                                                                                            |   |
|---------|----------------------------------------------------------------------------|------------------------------------------------------------------------------------------------------------|---|
| FASTKD5 | FAST kinase domains 5                                                      | dJ1187M17.5                                                                                                |   |
| FAT3    | FAT atypical cadherin 3                                                    | CDHF15, CDHR10                                                                                             |   |
| FAU     | Pinker-Diskis-Kenny murine sarcoma virus (FPB-MuSV) ubiquitously expressed | FAU1, Fub1, Fubi, MNSFbeta, RPS30, S30, asr1                                                               |   |
| FBLIM1  | Filamin binding LIM protein 1                                              | RP11-169K16.5, CAL, FBLP-1, FBLP1                                                                          |   |
| FBLN1   | Fibulin 1                                                                  | CTA-941F9.7, FBLN, FIBL1                                                                                   |   |
| FBLN5   | Fibulin 5                                                                  | UNQ1847/KROZ10, ADCLZ, ANCLTA, ANMDS, RANGLD, ECTOET, FBN, OFH1SDZ, MASS, MFS1, OCTD, SCS, SSKS, WMS, WMS2 |   |
| FBN1    | Fibrillin 1                                                                |                                                                                                            |   |
| FBN2    | Fibrillin 2                                                                | CCA, DA9                                                                                                   |   |
| FBXL14  | F-box and leucine-rich repeat protein 14                                   | Fbl14                                                                                                      |   |
| FBXL17  | F-box and leucine-rich repeat protein 17                                   | FBXO13, Fbl17, Fbx13                                                                                       |   |
| FBXL20  | F-box and leucine-rich repeat protein 20                                   | RP11-690G19.3, Fbl2, Fbl20                                                                                 |   |
| FBXL21  | F-box and leucine-rich repeat protein 21                                   | FBL3B, FBXL3B, FBXL3P, Fbl21                                                                               |   |
| FBXL3   | F-box and leucine-rich repeat protein 3                                    | FBL3, FBL3AA, FBXL3                                                                                        |   |
| FBXL5   | F-box and leucine-rich repeat protein 5                                    | FBL4, FBL5, FLR1                                                                                           |   |
| FBXO11  | F-box protein 11                                                           | UG063H01, FBX11, PRMT9, UBR6, VIT1                                                                         | v |
| FBXO2   | F-box protein 2                                                            | FBG1, FBX2, Fbs1, NFB42, OCP1                                                                              |   |
| FBXO21  | F-box protein 21                                                           | FBX21                                                                                                      |   |
| FBXO22  | F-box protein 22                                                           | FBX22, FISTC1                                                                                              |   |
| FBXO24  | F-box protein 24                                                           | FBX24                                                                                                      |   |
| FBXO25  | F-box protein 25                                                           | FBX25                                                                                                      |   |
| FBXO28  | F-box protein 28                                                           | CENP-30, Fbx28                                                                                             |   |
| FBXO3   | F-box protein 3                                                            | FBA, FBX3                                                                                                  |   |
| FBXO30  | F-box protein 30                                                           | RP11-545I5.4, Fbx30                                                                                        |   |
| FBXO31  | F-box protein 31                                                           | PP2386, FBX14, FBXO14, Fbx31, pp2386                                                                       |   |
| FBXO32  | F-box protein 32                                                           | Fbx32, MAFbx                                                                                               |   |
| FBXO33  | F-box protein 33                                                           | BMND12, Fbx33, c14_5247                                                                                    |   |
| FBXO34  | F-box protein 34                                                           | CGI-301, Fbx34                                                                                             |   |
| FBXO36  | F-box protein 36                                                           | Fbx36                                                                                                      |   |
| FBXO39  | F-box protein 39                                                           | CT144, Fbx39                                                                                               |   |
| FBXO40  | F-box protein 40                                                           | FBX40                                                                                                      |   |
| FBXO41  | F-box protein 41                                                           | FBX41                                                                                                      |   |
| FBXO42  | F-box protein 42                                                           | Fbx42, JFK                                                                                                 |   |
| FBXO43  | F-box protein 43                                                           | 4930533G20Rik, Emi2                                                                                        |   |

|        |                                                         |                                                                                              |   |
|--------|---------------------------------------------------------|----------------------------------------------------------------------------------------------|---|
| FBXO45 | F-box protein 45                                        | Fbx45                                                                                        |   |
| FBXO47 | F-box protein 47                                        |                                                                                              |   |
| FBXO5  | F-box protein 5                                         | RP1-101K10.5, EMI1, FBX5, Fbxo31                                                             |   |
| FBXO7  | F-box protein 7                                         | LLZZNC03-28119.2, FBA, FBA07, FBA7, FARK15, FKPS                                             |   |
| FBXW11 | F-box and WD repeat domain containing 11                | BTRC2, BTRCP2, FBW1B, FBXW1B, Fbw11, Hos                                                     |   |
| FBXW2  | F-box and WD repeat domain containing 2                 | RP11-88M19.2, FBW2, Fwd2, Md6                                                                |   |
| FBXW7  | F-box and WD repeat domain containing 7                 | AGO, CDC4, FBW6, FBW7, FBX30, FBXO30, FBXW0, SEL10, SEL10-1A, SEL10-4                        | √ |
| FCAMR  | Fc receptor, IgA, IgM, high affinity                    | FKSG87, CD351, FCA/MR                                                                        |   |
| FCGR1A | Fc fragment of IgG, high affinity Ia, receptor (CD64)   | RP11-196G18.2, CD64, CD64A, FCRI, IGFR1                                                      |   |
| FCGR3A | Fc fragment of IgG, low affinity IIIa, receptor (CD16)  | RP11-5K25.1, CD16, CD16A, FCG3, FCGR3, FCGR3L                                                |   |
| FCGR3B | Fc fragment of IgG, low affinity IIIb, receptor (CD16b) | RP11-25K21.3, CD16, CD16B, FCG3, FCGR3, FCRT10, FCRIII, FCRIII1                              |   |
| FCGRT  | Fc fragment of IgG, receptor, transporter, alpha        | FCRN, alpha-chain                                                                            |   |
| FCRL2  | Fc receptor-like 2                                      | RP11-50757.0, CD307b, FCRL2, HGF4, IRTA4, STAF1, SPAD1A, SPAD1B, SPAD1C                      |   |
| FCRL4  | Fc receptor-like 4                                      | CD307d, FCRH4, IGFP2, IRTA1                                                                  |   |
| FCRL5  | Fc receptor-like 5                                      | RP11-217A12.1, DAMA51, CD307f, CD307e, FCRL5, IRTA2, RP0830                                  |   |
| FCRLA  | Fc receptor-like A                                      | FCRL4, FCRL4-1, FCRL4-2, FCRL4-3                                                             |   |
| FDFT1  | farnesyl-diphosphate farnesyltransferase 1              | DGPT, ERG9, SQS, SS                                                                          |   |
| FDX1   | Ferredoxin 1                                            | ADX, FDX, LOH11CR1D                                                                          |   |
| FECH   | Ferrochelatase                                          | EPP, FCE                                                                                     |   |
| FER    | Fer (fps/fes related) tyrosine kinase                   | FER1, FER1K/4, FER1E10, FER1E13, FER1E5, FER1E6, FER2                                        |   |
| FER1L4 | Fer-1-like family member 4, pseudogene (functional)     | RP3-477O4.7, C20orf124                                                                       |   |
| FERMT1 | Fermitin family member 1                                | RP3-1050H1.1, C20orf42, DTCC02, KIND1, UNCT12A, UDD1                                         |   |
| FES    | FES proto-oncogene, tyrosine kinase                     | FPS                                                                                          |   |
| FEZ1   | Fasciculation and elongation protein zeta 1 (avian D)   |                                                                                              |   |
| FGA    | Fibrinogen alpha chain                                  | Fib2                                                                                         |   |
| FGD3   | FYVE, KNOX1 and FY domain containing 3                  | RP11-274J16.4, ZFYVE5                                                                        |   |
| FGD4   | FYVE, KNOX1 and FY domain containing 4                  | CMT4H, FRABP, ZFYVE6                                                                         |   |
| FGF1   | Fibroblast growth factor 1 (acidic)                     | AFGF, EGF1, EGF-0cta, EGF0A, EGF0B, FGF-1, FGF-1b, FGF1, GLI0702, HGF1, HGF1                 |   |
| FGF12  | Fibroblast growth factor 12                             | FGF12B, FHF1                                                                                 |   |
| FGF2   | Fibroblast growth factor 2 (basic)                      | BFGF, FGF-2, FGFB, HBGF-2                                                                    |   |
| FGF7   | Fibroblast growth factor 7                              | HBGF-7, KGF                                                                                  |   |
| FGF9   | Fibroblast growth factor 9                              | FGF-9, GAF, HBFG-9, HBGF-                                                                    |   |
| FGFR1  | Fibroblast growth factor receptor 1                     | BTGFR, CD331, CLK, FGFBR, FGFRT, FGF-2, FLT2, HGF1, HGF2, HGF3, HGF4, HGF5, KAL2, NCSAM, OGD | √ |

|          |                                                           |                                                                                                                                                                                                                                                                                                                                                                                                                                                                                                                                                                                                                                                                                                                                                   |   |
|----------|-----------------------------------------------------------|---------------------------------------------------------------------------------------------------------------------------------------------------------------------------------------------------------------------------------------------------------------------------------------------------------------------------------------------------------------------------------------------------------------------------------------------------------------------------------------------------------------------------------------------------------------------------------------------------------------------------------------------------------------------------------------------------------------------------------------------------|---|
| FGFR1OP  | FGFR1 oncogene partner                                    | FOP                                                                                                                                                                                                                                                                                                                                                                                                                                                                                                                                                                                                                                                                                                                                               | √ |
| FGFR1OP2 | FGFR1 oncogene partner 2                                  | HSPC123, HSPC123-like, WIT3.0                                                                                                                                                                                                                                                                                                                                                                                                                                                                                                                                                                                                                                                                                                                     |   |
| FGFR2    | Fibroblast growth factor receptor 2                       | BBDS, BLK, BTK-1, CD332, CEK3, CDT1, ECT1, JWS, K SAM, KGER, TK14, TK25                                                                                                                                                                                                                                                                                                                                                                                                                                                                                                                                                                                                                                                                           | √ |
| FGFR3    | Fibroblast growth factor receptor 3                       | ACH, CD333, CEK2, HSFGFR3EX, JTK4                                                                                                                                                                                                                                                                                                                                                                                                                                                                                                                                                                                                                                                                                                                 | √ |
| FGL2     | Fibrinogen-like 2                                         | T49, pT49                                                                                                                                                                                                                                                                                                                                                                                                                                                                                                                                                                                                                                                                                                                                         |   |
| FHAD1    | Forkhead-associated (FHA) phosphopeptide binding domain 1 | RP3-467K16.1                                                                                                                                                                                                                                                                                                                                                                                                                                                                                                                                                                                                                                                                                                                                      |   |
| FHDC1    | FH2 domain containing 1                                   |                                                                                                                                                                                                                                                                                                                                                                                                                                                                                                                                                                                                                                                                                                                                                   |   |
| FHL3     | Four and a half LIM domains 3                             | SLIM2                                                                                                                                                                                                                                                                                                                                                                                                                                                                                                                                                                                                                                                                                                                                             |   |
| FHL5     | Four and a half LIM domains 5                             | RP3-393D12.2, ACT, dJ393D12.2                                                                                                                                                                                                                                                                                                                                                                                                                                                                                                                                                                                                                                                                                                                     |   |
| FHOD3    | Formin homology 2 domain containing 3                     | FHOS2, Formactin2                                                                                                                                                                                                                                                                                                                                                                                                                                                                                                                                                                                                                                                                                                                                 |   |
| FIBCD1   | Fibrinogen C domain containing 1                          | RP11-83J21.2                                                                                                                                                                                                                                                                                                                                                                                                                                                                                                                                                                                                                                                                                                                                      |   |
| FIGN     | Fidgetin                                                  | RP23-312N5.1, fi, fidget                                                                                                                                                                                                                                                                                                                                                                                                                                                                                                                                                                                                                                                                                                                          |   |
| FIGNL1   | Fidgetin-like 1                                           |                                                                                                                                                                                                                                                                                                                                                                                                                                                                                                                                                                                                                                                                                                                                                   |   |
| FIGNL2   | Fidgetin-like 2                                           |                                                                                                                                                                                                                                                                                                                                                                                                                                                                                                                                                                                                                                                                                                                                                   |   |
| FIP1L1   | Factor interacting with PAPOLA and CPSF1                  | FIP1, Rhe, hFip1                                                                                                                                                                                                                                                                                                                                                                                                                                                                                                                                                                                                                                                                                                                                  | √ |
| FIZ1     | FLT3-interacting zinc finger 1                            | ZNF798                                                                                                                                                                                                                                                                                                                                                                                                                                                                                                                                                                                                                                                                                                                                            |   |
| FKBP11   | FK506 binding protein 11, 19 kDa                          | UNQ336/PRO535, FKBP19                                                                                                                                                                                                                                                                                                                                                                                                                                                                                                                                                                                                                                                                                                                             |   |
| FKBP1A   | FK506 binding protein 1A, 12 kDa                          | FKBP11-1, FKBP12, FKBP13, FKBP14, FKBP15, FKBP16, FKBP17, FKBP18, FKBP19, FKBP20, FKBP21, FKBP22, FKBP23, FKBP24, FKBP25, FKBP26, FKBP27, FKBP28, FKBP29, FKBP30, FKBP31, FKBP32, FKBP33, FKBP34, FKBP35, FKBP36, FKBP37, FKBP38, FKBP39, FKBP40, FKBP41, FKBP42, FKBP43, FKBP44, FKBP45, FKBP46, FKBP47, FKBP48, FKBP49, FKBP50, FKBP51, FKBP52, FKBP53, FKBP54, FKBP55, FKBP56, FKBP57, FKBP58, FKBP59, FKBP60, FKBP61, FKBP62, FKBP63, FKBP64, FKBP65, FKBP66, FKBP67, FKBP68, FKBP69, FKBP70, FKBP71, FKBP72, FKBP73, FKBP74, FKBP75, FKBP76, FKBP77, FKBP78, FKBP79, FKBP80, FKBP81, FKBP82, FKBP83, FKBP84, FKBP85, FKBP86, FKBP87, FKBP88, FKBP89, FKBP90, FKBP91, FKBP92, FKBP93, FKBP94, FKBP95, FKBP96, FKBP97, FKBP98, FKBP99, FKBP100 |   |
| FKBP4    | FK506 binding protein 4, 59 kDa                           | FKBP51, FKBP52, FKBP59, HBI                                                                                                                                                                                                                                                                                                                                                                                                                                                                                                                                                                                                                                                                                                                       |   |
| FKBP5    | FK506 binding protein 5                                   | FKBP51, FKBP52, FKBP59, HBI                                                                                                                                                                                                                                                                                                                                                                                                                                                                                                                                                                                                                                                                                                                       |   |
| FKBP6    | FK506 binding protein 6, 36 kDa                           | FKBP36                                                                                                                                                                                                                                                                                                                                                                                                                                                                                                                                                                                                                                                                                                                                            |   |
| FKBP7    | FK506 binding protein 7                                   | RP23-468L22.3, 23kDa, FKBP-7, FKBP23                                                                                                                                                                                                                                                                                                                                                                                                                                                                                                                                                                                                                                                                                                              |   |
| FKSG83   |                                                           |                                                                                                                                                                                                                                                                                                                                                                                                                                                                                                                                                                                                                                                                                                                                                   |   |
| FKTN     | Fukutin                                                   | RP11-235C23.1, CMD1X, FCMD, LGMD2M, MDDGA4                                                                                                                                                                                                                                                                                                                                                                                                                                                                                                                                                                                                                                                                                                        |   |
| FLG2     | Filaggrin family member 2                                 | RP1-14N1.3, IFPS                                                                                                                                                                                                                                                                                                                                                                                                                                                                                                                                                                                                                                                                                                                                  |   |
| FLI1     | Flt-1 proto-oncogene, ETS transcription factor            | EWSR2, SIC-1                                                                                                                                                                                                                                                                                                                                                                                                                                                                                                                                                                                                                                                                                                                                      | √ |
| FLII     | Flightless I homolog (Drosophila)                         | FLI, FLIL, Fli1                                                                                                                                                                                                                                                                                                                                                                                                                                                                                                                                                                                                                                                                                                                                   |   |
| FLJ10038 | Uncharacterized protein FLJ10038                          |                                                                                                                                                                                                                                                                                                                                                                                                                                                                                                                                                                                                                                                                                                                                                   |   |
| FLJ10213 |                                                           |                                                                                                                                                                                                                                                                                                                                                                                                                                                                                                                                                                                                                                                                                                                                                   |   |
| FLJ10357 |                                                           |                                                                                                                                                                                                                                                                                                                                                                                                                                                                                                                                                                                                                                                                                                                                                   |   |
| FLJ10489 |                                                           |                                                                                                                                                                                                                                                                                                                                                                                                                                                                                                                                                                                                                                                                                                                                                   |   |
| FLJ12825 | Uncharacterized LOC440101                                 |                                                                                                                                                                                                                                                                                                                                                                                                                                                                                                                                                                                                                                                                                                                                                   |   |
| FLJ16124 | FLJ16124 protein                                          |                                                                                                                                                                                                                                                                                                                                                                                                                                                                                                                                                                                                                                                                                                                                                   |   |

|          |                                           |  |  |
|----------|-------------------------------------------|--|--|
| FLJ22763 | Uncharacterized LOC401081                 |  |  |
| FLJ23152 |                                           |  |  |
| FLJ26245 | Uncharacterized LOC400533                 |  |  |
| FLJ26850 | FLJ26850 protein                          |  |  |
| FLJ30838 |                                           |  |  |
| FLJ31104 | Uncharacterized LOC441072                 |  |  |
| FLJ32063 |                                           |  |  |
| FLJ32742 | Uncharacterized locus FLJ32742            |  |  |
| FLJ34503 | Uncharacterized FLJ34503                  |  |  |
| FLJ35220 |                                           |  |  |
| FLJ36000 | Uncharacterized FLJ36000                  |  |  |
| FLJ37798 |                                           |  |  |
| FLJ38028 |                                           |  |  |
| FLJ39061 | Uncharacterized protein FLJ39061          |  |  |
| FLJ39080 | Uncharacterized LOC441355                 |  |  |
| FLJ39582 | Hypothetical protein FLJ39582             |  |  |
| FLJ39653 | Hncharacterized protein FLJ39653          |  |  |
| FLJ40194 | Hncharacterized FLJ40194                  |  |  |
| FLJ40288 | Hncharacterized FLJ40288                  |  |  |
| FLJ40330 |                                           |  |  |
| FLJ40448 |                                           |  |  |
| FLJ41278 | Uncharacterized LOC400046                 |  |  |
| FLJ41309 |                                           |  |  |
| FLJ41423 | Putative uncharacterized protein FLJ41423 |  |  |
| FLJ41484 |                                           |  |  |
| FLJ42200 | FLJ42200 protein                          |  |  |
| FLJ42280 |                                           |  |  |
| FLJ42393 | Uncharacterized LOC401105                 |  |  |
| FLJ42627 | Uncharacterized LOC645644                 |  |  |
| FLJ42842 |                                           |  |  |
| FLJ42953 |                                           |  |  |
| FLJ43315 | Asparagine synthetase pseudogene          |  |  |
| FLJ43390 |                                           |  |  |

|          |                                                    |                                                                                            |   |
|----------|----------------------------------------------------|--------------------------------------------------------------------------------------------|---|
| FLJ43950 |                                                    |                                                                                            |   |
| FLJ43963 |                                                    |                                                                                            |   |
| FLJ44054 |                                                    |                                                                                            |   |
| FLJ44082 |                                                    |                                                                                            |   |
| FLJ44313 | FLJ44313 protein                                   |                                                                                            |   |
| FLJ44790 | Uncharacterized FLJ44790                           |                                                                                            |   |
| FLJ44838 | Uncharacterized LOC644767                          |                                                                                            |   |
| FLJ44881 |                                                    |                                                                                            |   |
| FLJ45244 |                                                    |                                                                                            |   |
| FLJ45949 |                                                    |                                                                                            |   |
| FLJ77644 |                                                    |                                                                                            |   |
| FLJ90757 |                                                    |                                                                                            |   |
| FLNC     | Filamin C, gamma                                   | ADI-280, ADI280A, ADI A, ADI L, FLN2, MITMD, MDD4                                          |   |
| FLOT2    | Flotillin 2                                        | ECS-1, ECS1, ESA, ESA1, M17S1                                                              |   |
| FLRT2    | Fibronectin leucine rich transmembrane protein 2   |                                                                                            |   |
| FLT1     | Fms-related tyrosine kinase 1                      | FLT, FLT-1, VEGFR-1, VEGFR1                                                                |   |
| FLT3     | Fms-related tyrosine kinase 3                      | RP11-153M24.3, CD135, FLK-2, FLK2, STK1                                                    | v |
| FLT3LG   | Fms-related tyrosine kinase 3 ligand               | FL, FLT3L                                                                                  |   |
| FLT4     | Fms-related tyrosine kinase 4                      | FLT41, LMPH1A, PCL, VEGFR3                                                                 |   |
| FMN1     | Formin 1                                           | FMN, LD                                                                                    |   |
| FMN2     | Formin 2                                           | RP11-90L13.1                                                                               |   |
| FMNL2    | Formin-like 2                                      | FHOD2                                                                                      |   |
| FMNL3    | Formin-like 3                                      | FHOD3, WBP-3, WBP3                                                                         |   |
| FMO2     | Flavin containing monooxygenase 2 (non-functional) | FMO1B1                                                                                     |   |
| FMO5     | Flavin containing monooxygenase 5                  | RP11-337C18.2                                                                              |   |
| FMR1     | Fragile X mental retardation 1                     | FMRP, FRAXA, POF, POF1                                                                     |   |
| FN3K     | Fructosamine 3 kinase                              |                                                                                            |   |
| FN3KRP   | Fructosamine 3 kinase related protein              | FN3KL                                                                                      |   |
| FNBP1    | Formin binding protein 1                           | FBP17                                                                                      | v |
| FNBP4    | Formin binding protein 4                           | FBP30                                                                                      |   |
| FNDC3A   | Fibronectin type III domain containing 3A          | RP11-205H6.5, FNDC3, HUGO, OA205H6.1, UNQ2421/FR04719/FR054274, FAD104, FR04719, VV/TM2421 |   |
| FNDC3B   | Fibronectin type III domain containing 3B          |                                                                                            |   |
| FNDC5    | Fibronectin type III domain containing 5           | FRCP2, irisin                                                                              |   |

|        |                                                         |                                                                                                       |   |
|--------|---------------------------------------------------------|-------------------------------------------------------------------------------------------------------|---|
| FNDC7  | Fibronectin type III domain containing 7                | RP11-293A10.2                                                                                         |   |
| FNIP1  | Folliculin interacting protein 1                        |                                                                                                       |   |
| FNIP2  | Folliculin interacting protein 2                        | FNIP1, MAPO1                                                                                          |   |
| FOLH1  | Folate hydrolase (prostate-specific membrane antigen) 1 | GIG27, FOLH1, FOLH2, GCF2, GCF11, NAALAD1, GIG26, FOLH2, DSM, DSM1, GCF5, GCF11, FSM, FSM1-LIKE, DSM1 |   |
| FOLH1B | Folate hydrolase 1B                                     |                                                                                                       |   |
| FOS    |                                                         |                                                                                                       |   |
| FOSB   | FBJ murine osteosarcoma viral oncogene homolog B        | AP-1, G0S3, GOS3, GOSB                                                                                |   |
| FOXD3  | Forkhead box D3                                         | AIS1, Genesis, HFH2, VAMAS2                                                                           |   |
| FOXF1  | Forkhead box F1                                         | ACDMPV, FKHL5, FREAC1                                                                                 |   |
| FOXG1  | Forkhead box G1                                         | DT1, DT2, FKH13, FKH12, FKH11, FKH12, FKH13, FKH14, FOXC1B, FOXC1C, HFE1, HFE2, HFE3                  |   |
| FOXJ2  | Forkhead box J2                                         | FHX                                                                                                   |   |
| FOXJ3  | Forkhead box J3                                         |                                                                                                       |   |
| FOXK1  | Forkhead box K1                                         | FOXK1L                                                                                                |   |
| FOXK2  | Forkhead box K2                                         | ILF, ILF-1, ILF1                                                                                      |   |
| FOXL1  | Forkhead box L1                                         | FKH6, FKHL11, FREAC7                                                                                  |   |
| FOXN2  | Forkhead box N2                                         | HTLF                                                                                                  |   |
| FOXN3  | Forkhead box N3                                         | C14orf116, CHES1, PRO1635                                                                             |   |
| FOXO3  | Forkhead box O3                                         | AF6q21, FKHRL1, FKHRL1P2, FOXO2A, FOXO3                                                               |   |
| FOXP1  | Forkhead box P1                                         | HSPC215, 12CC4, QRF1, hFKH1B                                                                          | v |
| FOXP2  | Forkhead box P2                                         | CAGH44, SPCH1, TNRC10                                                                                 |   |
| FPGT   | Fucose-1-phosphate guanylyltransferase                  | GFPP                                                                                                  |   |
| FPR2   | Formyl peptide receptor 2                               | ALX1, FFM1-R-11, FFM1-A, FFM1, FFM2, FFM1, FMC2, FMC1A, FPR2                                          |   |
| FPR3   | Formyl peptide receptor 3                               | FMC2, FMC1A, FPR2, FFM1, FFM2, FFM1, FFM2, FFM1, FFM2, FFM1                                           |   |
| FRAS1  | Fraser extracellular matrix complex subunit 1           |                                                                                                       |   |
| FRAT2  | Frequently rearranged in advanced T-cell lymphomas 2    | RP11-452K12.2                                                                                         |   |
| FREM2  | FRAS1 related extracellular matrix protein 2            |                                                                                                       |   |
| FRG2   | FSHD region gene 2                                      | FRG2A                                                                                                 |   |
| FRMD4A | FERM domain containing 4A                               | RP11-397C18.4, FRMD4, bA295P9.4                                                                       |   |
| FRMD6  | FERM domain containing 6                                | C14orf31, EX1, Willin, c14_5320                                                                       |   |
| FRMD7  | FERM domain containing 7                                | RP6-213H19.2, NYS, NYS1, XIPAN                                                                        |   |
| FRMD8  | FERM domain containing 8                                | FKSG44                                                                                                |   |
| FRMPD4 | FERM and PDZ domain containing 4                        | PDZD10, PDZK10                                                                                        |   |
| FRRS1  | Ferric-chelate reductase 1                              | SDFR2, SDR2                                                                                           |   |

|        |                                                                 |                                                                       |   |
|--------|-----------------------------------------------------------------|-----------------------------------------------------------------------|---|
| FRS2   | Fibroblast growth factor receptor substrate 2                   | FRS2Aalpha, SNT, SNT-1, SNT1, FRS2                                    |   |
| FRS3   | Fibroblast growth factor receptor substrate 3                   | RP11-276J23.2, FRS2-beta, FRS2D, FRS2beta, SNT-2, SNT3                |   |
| FRY    | Furry homolog (Drosophila)                                      | RP11-37E23.0, FCDNA73, Z14K23.2, C130H14, CC002, LA207N4.2, LA27E22.1 |   |
| FRYL   | FRY-like                                                        | KIAA0826                                                              |   |
| FSD1L  | Fibronectin type III and SPRY domain containing 1-like          | RP11-255C23.3, CCDC10, CSDC1D1, FSD1CL, FSD1NL, MIR1                  |   |
| FSHR   | Follicle stimulating hormone receptor                           | FSHRO, LGR1, ODG1                                                     |   |
| FSIP2  | Fibrous sheath interacting protein 2                            | hCG_1799183                                                           |   |
| FSTL1  | Follistatin-like 1                                              | FRP, FSL1, MIR198                                                     |   |
| FSTL3  | Follistatin-like 3 (secreted glycoprotein)                      | UNQ674/PRO1308, FLRG, FSRP                                            | √ |
| FSTL4  | Follistatin-like 4                                              |                                                                       |   |
| FSTL5  | Follistatin-like 5                                              |                                                                       |   |
| FTLP10 | Ferritin, light polypeptide pseudogene 10                       |                                                                       |   |
| FTO    | Fat mass and obesity associated                                 | ALKBH9                                                                |   |
| FTSJD1 |                                                                 |                                                                       |   |
| FTSJD2 |                                                                 |                                                                       |   |
| FUBP3  | Far upstream element (FUSE) binding protein 3                   | RP11-57C19.3, FBP3                                                    |   |
| FUCA1  | Fucosidase, alpha-L- 1, tissue                                  | RP11-45G17.1, FUCA                                                    |   |
| FUK    | Fucokinase                                                      | UNQ5838, 1110046B12Rik                                                |   |
| FUS    | FUS RNA binding protein                                         | ALS6, ETM41, HNRNPP2, POMP75, TLS, FUS                                | √ |
| FUT1   | fucosyltransferase 1 (galactoside 2-alpha-L-fucosyltransferase) | H, HH, HSC                                                            |   |
| FUT10  | fucosyltransferase 10 (alpha(1-3))                              |                                                                       |   |
| FUT4   | fucosyltransferase 4 (alpha(1,3))                               | CD15, ELFT, FCT3A, FUC-TIV, FUTIV, LeX, SSEA-1                        |   |
| FUT5   | fucosyltransferase 5 (alpha(1,3))                               | FUC-TV                                                                |   |
| FUT9   | fucosyltransferase 9 (alpha(1,3))                               | Fuc-TIX                                                               |   |
| FUZ    | Fuzzy planar cell polarity protein                              | FY, NTD                                                               |   |
| FXC1   |                                                                 |                                                                       |   |
| FXN    | Frataxin                                                        | CyaY, FA, FARR, FRDA, X25                                             |   |
| FXYD6  | FXYD domain containing ion transport regulator 6                | UNQ521/PRO1056                                                        |   |
| FYB    | FYN binding protein                                             | ADAP, PRO0823, SLAP-130                                               |   |
| FYTTD1 | Forty-two-three domain containing 1                             | UIF                                                                   |   |
| FZD4   | Frizzled class receptor 4                                       | CD344, EVK1, FEVK3, FZ4, FZ4, FZL4, GPCR, MFZ4, FZM4                  |   |
| G2E3   | G2/M-phase specific E3 ubiquitin protein ligase 3               | KIAA1333, PHF7B                                                       |   |
| G3BP1  | GTPase activating protein (SH3 domain) binding protein 1        | G3BP, HDH-VIII                                                        |   |



|           |                                                                                      |                                           |  |
|-----------|--------------------------------------------------------------------------------------|-------------------------------------------|--|
| G3BP2     | GTPase activating protein (SH3 domain) binding protein 2                             |                                           |  |
| GAB1      | GRB2-associated binding protein 1                                                    |                                           |  |
| GAB2      | GRB2-associated binding protein 2                                                    |                                           |  |
| GAB3      | GRB2-associated binding protein 3                                                    |                                           |  |
| GABARAPL2 | GABA(A) receptor-associated protein-like 2                                           | ATG8, ATG8C, GATE-16, GATE16, GEF-2, GEF2 |  |
| GABBR2    | Gamma-aminobutyric acid (GABA) B receptor binding protein transcription factor, beta | GABABR2, GPR51, GPRC3B, HG20, HRIHFB2099  |  |
| GABPB1    | Gamma-aminobutyric acid (GABA) A receptor binding protein transcription factor, beta | GABPB1, GABPB2, NBE2B1, NBE2B2            |  |
| GABRA1    | Gamma-aminobutyric acid (GABA) A receptor subunit 1                                  | ECA4, EIEE19, EJM, EJM5                   |  |
| GABRA2    | Gamma-aminobutyric acid (GABA) A receptor subunit 2                                  |                                           |  |
| GABRA4    | Gamma-aminobutyric acid (GABA) A receptor subunit 4                                  |                                           |  |
| GABRA5    | Gamma-aminobutyric acid (GABA) A receptor subunit 5                                  |                                           |  |
| GABRB2    | Gamma-aminobutyric acid (GABA) B receptor subunit 2                                  |                                           |  |
| GABRB3    | Gamma-aminobutyric acid (GABA) B receptor subunit 3                                  | ECA5                                      |  |
| GABRG1    | Gamma-aminobutyric acid (GABA) A receptor subunit 1, gamma                           |                                           |  |
| GABRG2    | Gamma-aminobutyric acid (GABA) A receptor subunit 2, gamma                           | CAE2, ECA2, GEFSP3                        |  |
| GAD2      | Glutamate decarboxylase 2 (pancreatic islets)                                        | RP11-420F12.2, GAD65                      |  |
| GADD45A   | Growth arrest and DNA-damage-inducible, alpha                                        | RP5-975D15.1, DDIT1, GADD45               |  |
| GADL1     | Glutamate decarboxylase-like 1                                                       | ADC, CSADC, HuADC, HuCSADC                |  |
| GAL3ST1   | Galactose-3-O-sulfotransferase 1                                                     | CST                                       |  |
| GAL3ST3   | Galactose-3-O-sulfotransferase 3                                                     | GAL3ST-3, GAL3ST2                         |  |
| GAL3ST4   | Galactose-3-O-sulfotransferase 4                                                     | PP6968, GAL3ST-4                          |  |
| GALK2     | Galactokinase 2                                                                      | GK2                                       |  |
| GALNT1    | N-glycosyltransferase 1                                                              | GALNAC-T1                                 |  |
| GALNT10   | N-glycosyltransferase 10                                                             | GALNACT10, PPGALNACT10, PPGANTASE10       |  |
| GALNT11   | N-glycosyltransferase 11                                                             | tcag7.1057, GALNACT11                     |  |
| GALNT12   | N-glycosyltransferase 12                                                             | CRCS1, GalNAc-T12                         |  |
| GALNT2    | N-glycosyltransferase 2                                                              | RP5-956O18.1, GalNAc-T2                   |  |
| GALNT3    | N-glycosyltransferase 3                                                              | GalNAc-T3, HFTC, HHS                      |  |
| GALNT4    | N-glycosyltransferase 4                                                              | GALNAC-T4, GALNACT4                       |  |
| GALNT5    | N-glycosyltransferase 5                                                              | GALNAC-T5, GALNACT5                       |  |
| GALNT7    | N-glycosyltransferase 7                                                              | GALNAC-T7, GalNAcT7                       |  |
| GALNTL1   |                                                                                      |                                           |  |
| GALNTL2   |                                                                                      |                                           |  |

|         |                                                                   |                                                        |   |
|---------|-------------------------------------------------------------------|--------------------------------------------------------|---|
| GALNTL5 |                                                                   |                                                        |   |
| GALP    | Galanin-like peptide                                              |                                                        |   |
| GAN     | Gigaxonin                                                         | GAN1, KLHL16                                           |   |
| GANC    | Glucosidase, alpha; neutral C                                     |                                                        |   |
| GAPT    | GAB2-binding adaptor protein,                                     | C5orf29                                                |   |
| GAPVD1  | GTPase activating protein and v-src<br>domains 1                  | RP11-184B22.1, GAPEX5, GAPex-5, RAP6                   |   |
| GAR1    | GAR1 ribonucleoprotein                                            | NOLA1                                                  |   |
| GAS1    | Growth arrest-specific 1                                          |                                                        |   |
| GAS2L1  | Growth arrest-specific 2 like 1                                   | GAR22                                                  |   |
| GAS7    | Growth arrest-specific 7                                          | MLL/GAS7                                               | √ |
| GAS8    | Growth arrest-specific 8                                          | GAS11                                                  |   |
| GATA2   | GATA binding protein 2                                            | DCML, IMD21, MONOMAC, NFE1B                            | √ |
| GATA6   | GATA binding protein 6                                            |                                                        |   |
| GATAD2A | GATA zinc finger domain containing 2A                             | p66alpha                                               |   |
| GATAD2B | GATA zinc finger domain containing 2B                             | RP11-216N14.6, MRD18, P66beta, p68                     |   |
| GATM    | Glycine aminotransferase (L-<br>aminioacetone amidio-transferase) | AGAT, AT, CCDS3                                        |   |
| GATS    | GATS, stromal antigen 3 opposite strand                           | tcag7.1177, STAG3OS                                    |   |
| GBA2    | Glucosidase, beta (bile acid) 2                                   | AD035, SPG46                                           |   |
| GBA3    | Glucosidase, beta (bile acid) 3                                   | CBG, CBGL1, GLUC, KLRP                                 |   |
| GBAS    | Glioblastoma amplified sequence                                   | NIPSNAP2                                               |   |
| GBF1    | Goigi brefeldin A resistant guanine                               | ARF1GEF                                                |   |
| GBP1    | Guanylate binding protein 1, interferon-<br>inducible             |                                                        |   |
| GBP2    | Guanylate binding protein 2, interferon-<br>inducible             |                                                        |   |
| GBP4    | Guanylate binding protein 4                                       | Mpa2                                                   |   |
| GBP6    | Guanylate binding protein 6                                       |                                                        |   |
| GCA     | Grancalcin, EF-hand calcium binding protein                       | GCL                                                    |   |
| GCAT    | Glycine C-acetyltransferase                                       | KBL                                                    |   |
| GCC2    | GRIP and coiled-coil domain containing 2                          | GCC185, RANBP2L4, REN53                                |   |
| GCFC1   |                                                                   |                                                        |   |
| GCH1    | GTP cyclohydrolase 1                                              | DYH14, DYH5, DYH5a, GCH1, GTP-CH-1, GTPCH1,<br>HBAH14B |   |
| GCLC    | Glutamate-cysteine ligase, catalytic subunit                      | GCL, GCS, GLCL, GLCLC                                  |   |
| GCLM    | Glutamate-cysteine ligase, modifier subunit                       | RP4-561L24.2, GLCLR                                    |   |
| GCM1    | Glial cells missing homolog 1 (Drosophila)                        | GCMA, hGCMa                                            |   |

|        |                                               |                                                |  |
|--------|-----------------------------------------------|------------------------------------------------|--|
| GCN1L1 | GCN1 general control of amino-acid            | GCN1, GCN1L, PRIC295                           |  |
| GCNT1  | Glucosaminyl (N-acetyl) transferase 1, core   | NP11-214N10.1, CZGN1, CZGN1-L, CZGN1T, GGN1,   |  |
| GCNT2  | Glucosaminyl (N-acetyl) transferase 2, 1-     | NP11-421M1.1, CCA1, CTRCT15C, GCNT3, IGNT, II, |  |
| GCOM1  | branching enzyme (Hlood group)                | NACCT1, NACCT1, ILG2, KA369010.2, KA421M1.1    |  |
| GCOM1  | GRINL1A complex locus 1                       | GRINL1A, Gcom2, MYZAP, MYZAP-POLR2M, gcom      |  |
| GDA    | Guanine deaminase                             | RP11-63P12.1, CYPIN, GUANASE, NEDASIN          |  |
| GDAP1  | Ganglioside induced differentiation           | CMT4, CMT4A, CMTRIA                            |  |
| GDAP2  | Ganglioside induced differentiation           | MACROD3                                        |  |
| GDEP   | associated protein 2                          |                                                |  |
| GDI1   | GDP dissociation inhibitor 1                  | AA11W61057D9.1, IA, GDIL, MKX41, MKX40,        |  |
| GDPD1  | Glycerophosphodiester phosphodiesterase       | ORIN2, BARCD1A, BARCD1A, YAB4                  |  |
| GDPD1  | domain containing 1                           | GDE4                                           |  |
| GEMIN6 | Gem (nuclear organelle) associated protein 6  |                                                |  |
| GEN1   | GEN1 Holliday junction 5' flap endonuclease   | Gen                                            |  |
| GFM1   | G elongation factor, mitochondrial 1          | COXPD1, EFG, EFG1, EFGM, EGF1, GFM, hEFG1      |  |
| GFOD1  | Glucose-fructose oxidoreductase domain        | RP11-501I19.1, ADG-90, C6orf114                |  |
| GFOD2  | Glucose-fructose oxidoreductase domain        | UNQ9430/PRO34691                               |  |
| GFPT1  | Glutamine-fructose-6-phosphate                | CM3TA1, GFA, GFAT, GFAT1, GFAT1, GFAT1M,       |  |
| GFPT1  | transaminase 1                                | GFPTL, MSLG, GFPT1                             |  |
| GFRA1  | GDNF family receptor alpha 1                  | GFRAK, MSNKA, GFR-ALPHA-1, KETTL, KETTL,       |  |
| GGA2   | Golgi-associated, gamma adaptin ear           | TRND1                                          |  |
| GGA2   | containing, gamma adaptin ear                 | VEAR                                           |  |
| GGA3   | Golgi-associated, gamma adaptin ear           |                                                |  |
| GGA3   | containing, ADF-binding protein 2             |                                                |  |
| GGCT   | Gamma-glutamylcyclotransferase                | C7orf24, CRF21, GCTG, GGC                      |  |
| GGNBP2 | Gametogenetin binding protein 2               | DIF-3, DIF3, LCRG1, LZK1, ZFP403, ZNF403       |  |
| GGPS1  | Geranylgeranyl diphosphate synthase 1         | GGPPS, GGPPS1                                  |  |
| GGT7   | Gamma-glutamyltransferase 7                   | NP11-18C9.2, DZ05101, GGT4, GGT5, GGT5,        |  |
| GGT8P  | Gamma-glutamyltransferase 8 pseudogene        | HL8C0.2                                        |  |
| GHITM  | Growth hormone inducible transmembrane        | My021, DERP2, HSPC282, MICS1, PTD010, TMBIM5   |  |
| GHR    | protein                                       | GHPB                                           |  |
| GHRLOS | Ghrelin opposite strand/antisense RNA         | GHRL-AS1, GHRLAS, NCRNA00068                   |  |
| GIGYF1 | GRB10 interacting GYF protein 1               | PP3360, GYF1, PERQ1                            |  |
| GIGYF2 | GRB10 interacting GYF protein 2               | GYF2, PARK11, PERQ2, PERQ3, TNRC15             |  |
| GIMAP7 | GTPase, IMAP family member 7                  | IAN7, hIAN7                                    |  |
| GIN1   | Gypsy retrotransposon integrase 1             | GIN-1, TGIN1, ZH2C2                            |  |
| GIPC2  | GIPC1/2 domain containing family,             | SEMCAP-2, SEMCAP2                              |  |
| GIT1   | G protein-coupled receptor kinase interacting |                                                |  |
| GIT1   | family class B                                |                                                |  |

|          |                                                         |                                                        |  |
|----------|---------------------------------------------------------|--------------------------------------------------------|--|
| GIT2     | G protein-coupled receptor kinase interacting protein 2 | CAT-2, CAT2                                            |  |
| GJA3     | Gap junction protein, alpha 3, 46 kDa                   | CTRCT14, CX46, CZP3                                    |  |
| GJA4     | Gap junction protein, alpha 4, 37 kDa                   | RP1-34M23.4, CX37                                      |  |
| GJA5     | Gap junction protein, alpha 5, 40 kDa                   | ATFB11, CX40                                           |  |
| GJA9     | Gap junction protein, alpha 9, 59 kDa                   | RP5-864K19.2, CX58, CX59, GJA10                        |  |
| GJB6     | Gap junction protein, beta 6, 30 kDa                    | CX30, DFNAS, DFNASB, DFNBD, ECTDZ, EDZ, EDL, HED, HED2 |  |
| GJB7     | Gap junction protein, beta 7, 25 kDa                    | CX25, bA136M9.1, connexin25                            |  |
| GJC1     | Gap junction protein, gamma 1, 45 kDa                   | CX45, GJA7                                             |  |
| GK       | Glycerol kinase                                         | GK1D, GK                                               |  |
| GK5      | Glycerol kinase 5 (putative)                            | RP11-485G4.2                                           |  |
| GLB1     | Galactosidase, beta 1                                   | EBP, ELNR1, MPS4B                                      |  |
| GLB1L2   | Galactosidase, beta 1-like 2                            | MSTP014, MST114, MSTP114                               |  |
| GLCCI1   | Glucocorticoid induced transcript 1                     | FAM117C, GCTR, GIG18, TSSN1                            |  |
| GLDN     | Gliomedin                                               | UNQ9559/PRO3401, CLOM, COLM, CRG-LZ, CRGL2, LINC112    |  |
| GLG1     | Golgi glycoprotein 1                                    | RP11-252A24.7, CFR-1, ESL-1, MG-160, MG160             |  |
| GLI2     | GLI family zinc finger 2                                | HPE9, PHS2, THP1, THP2                                 |  |
| GLIPR1   | GLI pathogenesis-related 1                              | CRISP7, GLIPR, RTVP1                                   |  |
| GLIPR1L2 | GLI pathogenesis-related 1 like 2                       |                                                        |  |
| GLIPR2   | GLI pathogenesis-related 2                              | RP11-421H8.5, C9orf19, GAPR-1, GAPR1                   |  |
| GLIS3    | GLIS family zinc finger 3                               | ZNF515                                                 |  |
| GLP1R    | Glucagon-like peptide 1 receptor                        |                                                        |  |
| GLRA3    | Glycine receptor, alpha 3                               |                                                        |  |
| GLRX     | Glutaredoxin (thioltransferase)                         | GRX, GRX1                                              |  |
| GLS      | Glutaminase                                             | AAD20, GAC, GAM1, KGA, GLS                             |  |
| GLT1D1   | Glycosyltransferase 1 domain containing 1               |                                                        |  |
| GLT25D1  |                                                         |                                                        |  |
| GLT8D2   | Glycosyltransferase 8 domain containing 2               | UNQ1901/PRO4347                                        |  |
| GLYAT    | Glycine-N-acyltransferase                               | ACGNAT, CAT, GAT                                       |  |
| GLYATL1  | Glycine-N-acyltransferase-like 1                        | GATF-C, GNAT                                           |  |
| GLYATL3  | Glycine-N-acyltransferase-like 3                        | RP11-28H17.5, C6orf140, bA28H17.2                      |  |
| GLYCTK   | Glycerate kinase                                        | LP5910, HBEBP2, HBEBP4, HBeAgBP4A                      |  |
| GLYR1    | Glyoxylate reductase 1 homolog (Arabidopsis)            | BM045, HIBDL, N-PAC, NP60                              |  |
| GMFB     | Glia maturation factor, beta                            | GMF                                                    |  |

|          |                                                                      |                                                                                    |   |
|----------|----------------------------------------------------------------------|------------------------------------------------------------------------------------|---|
| GMPPA    | GDP-mannose pyrophosphorylase A                                      | AAMR                                                                               |   |
| GNA12    | Guanine nucleotide binding protein (G                                | NNX3, RMP, gep                                                                     |   |
| GNA13    | Guanine nucleotide binding protein (G                                | G13                                                                                |   |
| GNA14    | Guanine nucleotide binding protein (G                                |                                                                                    |   |
| GNAI1    | Guanine nucleotide binding protein (G                                | Gi                                                                                 |   |
| GNAI3    | Guanine nucleotide binding protein (G                                | RP5-1160K1.2, 87U6, ARCND1                                                         |   |
| GNAO1    | Guanine nucleotide binding protein (G                                | EIEE17, G-ALPHA-o, GNAO                                                            |   |
| GNAS     | GNAS complex locus                                                   | RP4-545J17.4, AHO, C200H451, GISA, GSA, GST, NESP, DUB1A, DUB1B, DUB1C, DOLL, GNAS | v |
| GNAT1    | Guanine nucleotide binding protein (G                                | CSNBAD3, GBT1, GNATR                                                               |   |
| GNAZ     | Guanine nucleotide binding protein (G                                |                                                                                    |   |
| GNB1     | Guanine nucleotide binding protein (G                                | RP1-283E3.7                                                                        |   |
| GNB4     | Guanine nucleotide binding protein (G                                | RP11-145M9.4, CMTD1F                                                               |   |
| GNB5     | Guanine nucleotide binding protein (G                                | GB5                                                                                |   |
| GNG12    | Guanine nucleotide binding protein (G                                | RP5-975D15.2                                                                       |   |
| GNG2     | Guanine nucleotide binding protein (G                                |                                                                                    |   |
| GNG4     | Guanine nucleotide binding protein (G                                |                                                                                    |   |
| GNL3L    | Guanine nucleotide binding protein-like 3 (muscle-like)              | RP11-353K22.1                                                                      |   |
| GNPDA1   | Glucosamine-6-phosphate deaminase 1                                  | GNP1, GNPDA, GNPI, GPI, HLN                                                        |   |
| GNPDA2   | Glucosamine-6-phosphate deaminase 2                                  | GNP2, SB52                                                                         |   |
| GNPTAB   | N-acetylglucosamine-1-phosphate transferase, alpha and beta subunits | GNPTA, ICD                                                                         |   |
| GNRHR    | Gonadotropin-releasing hormone receptor                              | GNRHR1, GRHR, HH7, LHRHR, LRHR                                                     |   |
| GNS      | Glucosamine (N-acetyl)-6-sulfatase                                   | G6S                                                                                |   |
| GOLGA1   | Golgin A1                                                            | RP11-175D17.2, golgin-97                                                           |   |
| GOLGA3   | Golgin A3                                                            | GCP170, MEA-2                                                                      |   |
| GOLGA6D  | Golgin A6 family, member D                                           |                                                                                    |   |
| GOLGA6L9 | Golgin A6 family-like 9                                              | GOLGA6L20                                                                          |   |
| GOLGA7   | Golgin A7                                                            | HDCKB05F, GCP10, GOLGA5A1TA, HSPC041, GOLGA7                                       |   |
| GOLGA7B  | Golgin A7 family, member B                                           | C10orf132, C10orf133, bA451M19.3, bA459F3.4                                        |   |
| GOLGA8A  | Golgin A8 family, member A                                           | GM88                                                                               |   |
| GOLGA8B  | Golgin A8 family, member B                                           | GOLGA5                                                                             |   |
| GOLGA8C  | Golgi autoantigen, golgin subfamily a, 8C                            |                                                                                    |   |
| GOLGA8DP | Golgin A8 family, member D, pseudogene                               |                                                                                    |   |
| GOLGA8E  |                                                                      |                                                                                    |   |

|         |                                                        |                                                                  |   |
|---------|--------------------------------------------------------|------------------------------------------------------------------|---|
| GOLGA8F | Golgin A8 family, member F                             |                                                                  |   |
| GOLGA8G | Golgin A8 family, member G                             |                                                                  |   |
| GOLGB1  | golgin B1                                              | GCP, GCP372, GOLIM1                                              |   |
| GOLM1   | Golgi membrane protein 1                               | RP11-579F1.3, C90H155, GOLM12, GP75, HELL40, PSEC0257, LA270D1.2 |   |
| GOLPH3  | Golgi phosphoprotein 3 (coat-protein)                  | GOPP1, GPP34, MIDAS                                              |   |
| GOLPH3L | Golgi phosphoprotein 3-like                            | RP11-54A4.7, GPP34R                                              |   |
| GOLT1A  | Golgi transport 1A                                     | RP11-205F10.3, CGI-141, GOT1, HMFNT187, YMR292W                  |   |
| GOLT1B  | Golgi transport 1B                                     | CGI-141, GCT2, GOT1, GOT1B, YMR292W                              |   |
| GON4L   | Gon-4-like ( <i>C. elegans</i> )                       | RP11-101O6.1, GON-4, GON4, YARP                                  |   |
| GOPC    | Golgi-associated PDZ and coiled-coil motif containing  | CAL, FIG1, PIST, dJ94G16.2, GOPC                                 | v |
| GORAB   | Golgin, RAB6-interacting                               | GO, NTKLBP1, SCYL1BP1                                            |   |
| GORASP1 | Golgi reassembly stacking protein 1, 65kDa             | GOLPH5, GRASP65, P65                                             |   |
| GORASP2 | Golgi reassembly stacking protein 2, 55kDa             | GOLPH6, GRASP55, GRS2, p59                                       |   |
| GOT1    | Glutamic-oxaloacetic transaminase 1, mitochondrial     | ASTQTL1, GIG18, cAspAT, cCAT                                     |   |
| GOT2    | Glutamic-oxaloacetic transaminase 2, mitochondrial     | KAT4, KATIV, mitAAT                                              |   |
| GP5     | Glycoprotein V (platelet)                              | CD42d, GPV                                                       |   |
| GPAM    | Glycerol-3-phosphate acyltransferase, mitochondrial    | RP11-426E5.2, GPAT, GPAT1                                        |   |
| GPATCH2 | G patch domain containing 2                            | RP11-361K17.1, CT110, GPATC2, PPP1R30                            |   |
| GPBP1   | GC-rich promoter binding protein 1                     | GPBP, SSH6, VASCULIN                                             |   |
| GPC2    | Glypican 2                                             |                                                                  |   |
| GPC4    | Glypican4                                              | RP6-198C21.1, K-glypican                                         |   |
| GPC5    | Glypican5                                              |                                                                  |   |
| GPCPD1  | Glycerophosphocholine phosphodiesterase                | RP5-1022P6.2, GDE5, GDPD6, PREI4                                 |   |
| GPD1    | Glycerol-3-phosphate dehydrogenase 1 (cytosolic)       | AI747587, Gdc-1, Gdc1, mKIAA4010                                 |   |
| GPD1L   | Glycerol-3-phosphate dehydrogenase 1-like              | GPD1-L                                                           |   |
| GPD2    | Glycerol-3-phosphate dehydrogenase 2 (mitochondrial)   | GDH2, GPDM, mGPDH                                                |   |
| GPLD1   | Glycosylphosphatidylinositol specific phospholipase D1 | GPIPLD, GPIPLDM, PIGPLD, PIGPLD1, PLD                            |   |
| GPM6A   | glycoprotein M6A                                       | GPM6, M6A                                                        |   |
| GPN2    | GPN-loop GTPase 2                                      | RP1-50O24.5, ATPBD1B                                             |   |
| GPN3    | GPN-loop GTPase 3                                      | AD-009, ATPBD1C                                                  |   |
| GPR107  | G protein-coupled receptor 107                         | GCDRP, LUSTR1, bA138E2.2                                         |   |
| GPR110  | G protein-coupled receptor 110                         | RP11-39C2.1, KPG_012, PGR19, hGPCR36                             |   |
| GPR113  | G protein-coupled receptor 113                         | UNQ9196, PGR23, hGPCR37                                          |   |

|         |                                                    |                                                     |  |
|---------|----------------------------------------------------|-----------------------------------------------------|--|
| GPR116  | G protein-coupled receptor 116                     | KPG_001                                             |  |
| GPR12   | G protein-coupled receptor 12                      | GPCR12, GPCR21, PPP1R84                             |  |
| GPR123  | G protein-coupled receptor 123                     | RP13-439H18.10-002                                  |  |
| GPR124  | G protein-coupled receptor 124                     | TEM5                                                |  |
| GPR125  | G protein-coupled receptor 125                     | UNQ556/PRO1113, PGR21, TEM5L                        |  |
| GPR126  | G protein-coupled receptor 126                     | APG1, DREG, PS1TP2, VIGR                            |  |
| GPR132  | G protein-coupled receptor 132                     | G2A                                                 |  |
| GPR135  | G protein-coupled receptor 135                     | HUMNP11Y20                                          |  |
| GPR137B | G protein-coupled receptor 137B                    | RP5-985L19.1, TM7SF1                                |  |
| GPR137C | G protein-coupled receptor 137C                    | TM7SF1L2                                            |  |
| GPR155  | G protein-coupled receptor 155                     | DEP.7, DEPDC3, PGR22                                |  |
| GPR157  | G protein-coupled receptor 157                     | RP5-963K15.2                                        |  |
| GPR160  | G protein-coupled receptor 160                     | GPCR1, GPCR150                                      |  |
| GPR171  | G protein-coupled receptor 171                     | H963                                                |  |
| GPR174  | G protein-coupled receptor 174                     | FKSG79, GPCR17, LYPSR3                              |  |
| GPR180  | G protein-coupled receptor 180                     | ITR                                                 |  |
| GPR22   | G protein-coupled receptor 22                      | tcag7.108                                           |  |
| GPR26   | G protein-coupled receptor 26                      |                                                     |  |
| GPR3    | G protein-coupled receptor 3                       | ACCA                                                |  |
| GPR37L1 | G protein-coupled receptor 37 like 1               | ET(B)R-LP-2, ETBR-LP-2                              |  |
| GPR4    | G protein-coupled receptor 4                       |                                                     |  |
| GPR52   | G protein-coupled receptor 52                      |                                                     |  |
| GPR6    | G protein-coupled receptor 6                       |                                                     |  |
| GPR64   | G protein-coupled receptor 64                      | CTD-2245E12.1, EDDM6, HE6, TM7LN2                   |  |
| GPR81   | hydroxycarboxylic acid receptor 1                  | FKSG80, GPR104, GPR61, HCAT, LACK1, TA-GPCR, TACPCR |  |
| GPR83   | G protein-coupled receptor 83                      | GIR, GPR72                                          |  |
| GPR85   | G protein-coupled receptor 85                      | SREB, SREB2                                         |  |
| GPR88   | G protein-coupled receptor 88                      | STRG                                                |  |
| GPR98   | G protein-coupled receptor 98                      | FEB4, MASS1, USH2B, USH2C, VLGR1, VLGR1b            |  |
| GPRC5B  | G protein-coupled receptor, class C, group 5,      | RAIG-2, RAIG2                                       |  |
| GPRIN1  | G protein-regulated inducer of neurite outgrowth 1 | GRIN1                                               |  |
| GPRIN3  | GPRIN family member 3                              | GRIN3                                               |  |
| GPSM1   | G-protein signaling modulator 1                    | RP13-270L15.1, AGS3                                 |  |

|         |                                                             |                                                                                                  |  |
|---------|-------------------------------------------------------------|--------------------------------------------------------------------------------------------------|--|
| GPT2    | Glutamic pyruvate transaminase (alanine aminotransferase) 2 | ALT2                                                                                             |  |
| GPX3    | Glutathione peroxidase 3 (plasma)                           | GPx-P, GSHPx-3, GSHPx-P                                                                          |  |
| GPX6    | Glutathione peroxidase 6 (olfactory)                        | GPX3p, GPX3, GPX-6, GSHPx-6, U1160LN24, U1186N74.1                                               |  |
| GPX8    | Glutathione peroxidase 8                                    | UNQ26477/KO1783, EFLA847, GPX-8, GSHPx-8, UNQ847                                                 |  |
| GRAMD1C | GRAM domain containing 1C                                   | UNQ2543/PRO6095                                                                                  |  |
| GRAMD2  | GRAM domain containing 2                                    |                                                                                                  |  |
| GRAMD3  | GRAM domain containing 3                                    | NS3TP2                                                                                           |  |
| GRAMD4  | GRAM domain containing 4                                    | RP6-59H18.4, DIP, dA59H18.1, dJ439F8.1                                                           |  |
| GRAP    | GRB2-related adaptor protein                                |                                                                                                  |  |
| GRAP2   | GRB2-related adaptor protein 2                              | KP3-570M22.1, GADS, GRAP-2, GRB2L, GRB2G, GRB, GRBL, G4X, G-640, Mags, P28                       |  |
| GRB10   | Growth factor receptor-bound protein 10                     | GRB-IR, Grb-10, IRBP, MEG1, RSS                                                                  |  |
| GRB14   | Growth factor receptor-bound protein 14                     |                                                                                                  |  |
| GREB1   | Growth regulation by estrogen in breast cancer 1            |                                                                                                  |  |
| GREM1   | Gremlin 1, DAN family BMP antagonist                        | FIG2, CKTSF1B1, CRAC1, DAND2, DNK1, GREMLIN, HMBS, HIC-2                                         |  |
| GREM2   | Gremlin 2, DAN family BMP antagonist                        | CKTSF1B2, DAND3, PRDC                                                                            |  |
| GRHL1   | Grainyhead-like 1                                           | LBP32, MGR, NH32, TFPC2L2                                                                        |  |
| GRHL2   | Grainyhead-like 2                                           | BOM, DFNA28, TFPC2L3                                                                             |  |
| GRIA2   | Glutamate receptor, ionotropic, AMPA 2                      | GLUR2, GLURB, GluA2, GluR-K2, HBGR2                                                              |  |
| GRIA3   | Glutamate receptor, ionotropic, AMPA 3                      | KP11-549NT9.3, GLUR-C, GLUR-K3, GLUR3, GLURC, GluA3, MBX04                                       |  |
| GRIA4   | Glutamate receptor, ionotropic, AMPA 4                      | GLUR4, GLUR4C, GLURD, GluA4                                                                      |  |
| GRID1   | Glutamate receptor, ionotropic, delta 1                     | RP11-93H12.1, GluD1                                                                              |  |
| GRID2   | Glutamate receptor, ionotropic, delta 2                     | GluD2                                                                                            |  |
| GRIK2   | Glutamate receptor, ionotropic, kainate 2                   | EAA4, GLR6, GLUK6, GLUR6, GluK2, MRT6                                                            |  |
| GRIK3   | Glutamate receptor, ionotropic, kainate 3                   | EAA5, GLR7, GLUR7, GluK3, GluR7a                                                                 |  |
| GRIN1   | Glutamate receptor, ionotropic, N-methyl D-aspartate 1      | KP11-550GT4.1, GluN1, MKD6, NMDA1, NMDAR1, NP11-297M9.2, EFIN2, FESD, GluN2A, LKS, NMDAR2A, NR2A |  |
| GRIN2A  | Glutamate receptor, ionotropic, N-methyl D-aspartate 2A     |                                                                                                  |  |
| GRIN2C  | Glutamate receptor, ionotropic, N-methyl D-aspartate 2C     | GluN2C, NMDAR2C, NR2C                                                                            |  |
| GRINL1A |                                                             |                                                                                                  |  |
| GRIP1   | Glutamate receptor interacting protein 1                    | GRIP                                                                                             |  |
| GRIP2   | Glutamate receptor interacting protein 2                    |                                                                                                  |  |
| GRK6    | G protein-coupled receptor kinase 6                         | GPRK6                                                                                            |  |
| GRLF1   |                                                             |                                                                                                  |  |
| GRM1    | Glutamate receptor, metabotropic 1                          | GPRC1A, MGLU1, MGLUR1, PPP1R85, SCAR13                                                           |  |



|         |                                                                      |                                                                                                                                                                                                                        |  |
|---------|----------------------------------------------------------------------|------------------------------------------------------------------------------------------------------------------------------------------------------------------------------------------------------------------------|--|
| GRM5    | Glutamate receptor, metabotropic 5                                   | GPRC1E, MGLUR5, PPP1R86, mGlu5                                                                                                                                                                                         |  |
| GRM6    | Glutamate receptor, metabotropic 6                                   | CSNB1B, GPRC1F, MGLUR6, mGlu6                                                                                                                                                                                          |  |
| GRM7    | Glutamate receptor, metabotropic 7                                   | GLUR7, GPRC1G, MGLU7, MGLUR7, PPP1R87                                                                                                                                                                                  |  |
| GRM8    | Glutamate receptor, metabotropic 8                                   | GLUR8, GPRC1H, MGLUR8, mGlu8                                                                                                                                                                                           |  |
| GRPEL1  | GrpE-like 1, mitochondrial                                           | HMGE                                                                                                                                                                                                                   |  |
| GRPEL2  | GrpE-like 2, mitochondrial                                           | Mt-GrpE#2                                                                                                                                                                                                              |  |
| GRRP1   |                                                                      |                                                                                                                                                                                                                        |  |
| GRSF1   | G-rich RNA sequence binding factor 1                                 |                                                                                                                                                                                                                        |  |
| GSG1L   | GSG1-like                                                            | UNQ5831, PRO19651                                                                                                                                                                                                      |  |
| GSK3B   | Glycogen synthase kinase 3 beta                                      |                                                                                                                                                                                                                        |  |
| GSPT1   | G1 to S phase transition 1                                           | 551G9.2, ETF3A, GST1, eRF3a                                                                                                                                                                                            |  |
| GSR     | Glutathione reductase                                                | HEL-75                                                                                                                                                                                                                 |  |
| GSS     | Glutathione synthetase                                               | GSHS, HEL-S-64p, HEL-S-88n                                                                                                                                                                                             |  |
| GSTA4   | Glutathione S-transferase alpha 4                                    | RP1-214M20.1-4, GTA4,GSTA4                                                                                                                                                                                             |  |
| GSTCD   | Glutathione S-transferase, C-terminal domain containing              |                                                                                                                                                                                                                        |  |
| GSTM2   | Glutathione S-transferase mu 2 (muscle)                              | GST4, GSTM-2, GTHMUS,GSTM2                                                                                                                                                                                             |  |
| GSTM3   | Glutathione S-transferase mu 3 (brain)                               | RP4-735C1.2, GST5, GSTB-3, GTM3, GSTM3                                                                                                                                                                                 |  |
| GSTM5   | Glutathione S-transferase mu 5                                       | RP4-735C1.1-5, GTM5,GSTM5                                                                                                                                                                                              |  |
| GTDC1   | Glycosyltransferase-like domain containing                           | Hmat-Xa, mat-Xa                                                                                                                                                                                                        |  |
| GTF2E1  | General transcription factor IIc, polypeptide chain 56 kDa           | FE, TF2E1, TFIIIE-A                                                                                                                                                                                                    |  |
| GTF2E2  | General transcription factor IIc, polypeptide chain 74 kDa           | FE, TF2E2, TFIIIE-B                                                                                                                                                                                                    |  |
| GTF2F2  | General transcription factor III', polypeptide chain 20 kDa          | BTF4, RAP30, TF2F2, TFIIF                                                                                                                                                                                              |  |
| GTF2H1  | General transcription factor III', polypeptide chain 62 kDa          | BTF2, P62, TFB1, TFIIH                                                                                                                                                                                                 |  |
| GTF2H2  | General transcription factor III', polypeptide chain 44 kDa          | BTF2, BTF2P44, T-BTF2P44, TFIIH, p44                                                                                                                                                                                   |  |
| GTF2H2B | General transcription factor III', polypeptide chain 22 (pseudogene) |                                                                                                                                                                                                                        |  |
| GTF2H2C | GTF2H2 family member C                                               |                                                                                                                                                                                                                        |  |
| GTF2H2D | GTF2H2 family member C, copy 2                                       | GTF2H2D                                                                                                                                                                                                                |  |
| GTF2H5  | General transcription factor III', polypeptide chain 5 kDa           | COG175, TFB5, TFIIH, TGF2H5, TTD, TTD-A, TTD-B, TTD-C, TTD-D, TTD-E, TTD-F, TTD-G, TTD-H, TTD-I, TTD-J, TTD-K, TTD-L, TTD-M, TTD-N, TTD-O, TTD-P, TTD-Q, TTD-R, TTD-S, TTD-T, TTD-U, TTD-V, TTD-W, TTD-X, TTD-Y, TTD-Z |  |
| GTF2I   | General transcription factor Ii                                      | BA170J5, BTKAF1, DIWS, GTFI-1, IBZ91, STFN, TTF-1, WBS, WBSCR6                                                                                                                                                         |  |
| GTF2IP1 | General transcription factor Ii, pseudogene 1                        | WBSCR7                                                                                                                                                                                                                 |  |
| GTF3A   | General transcription factor IIIA                                    | RP11-125I23.2, AP2, TFIIIA                                                                                                                                                                                             |  |
| GTF3C4  | General transcription factor IIIc, polypeptide chain 90 kDa          | KAT12, TFIIIC90, TFIIIC290, TFIIIC90, TFIIICDELTA                                                                                                                                                                      |  |
| GTPBP1  | GTP binding protein 1                                                | RP3-508I15.1, GP-1, GP1, HSPC018                                                                                                                                                                                       |  |

|         |                                                                                        |                                                                                               |   |
|---------|----------------------------------------------------------------------------------------|-----------------------------------------------------------------------------------------------|---|
| GTPBP10 | GTP-binding protein 10 (putative)                                                      | UG0751c10, ObgH2                                                                              |   |
| GTPBP3  | GTP binding protein 3 (mitochondrial)                                                  | GTPBG3, MSS1, MTGP1, THDF1                                                                    |   |
| GTPBP6  | GTP binding protein 6 (putative)                                                       | LL0XNC01-136G2.2, PGPL                                                                        |   |
| GTSE1   | G-2 and S-phase expressed 1                                                            | RP5-1163J1.2, B99                                                                             |   |
| GUCA1B  | Guanylate cyclase activator 1B (retina)                                                | RP1-139D8.1, GCAP2, GUCA2, RP48                                                               |   |
| GUCY1A3 | Guanylate cyclase 1, soluble, alpha 3                                                  | NP11-588K22.2, GC-SA3, GUC1A3, GUCAS, GUCSA3, GUCY1A1, MYMY6                                  |   |
| GUCY1B2 | Guanylate cyclase 1, soluble, beta 2                                                   | GC-SB2                                                                                        |   |
| GUCY1B3 | Guanylate cyclase 1, soluble, beta 3                                                   | GC-S-beta-1, GC-SB3, GUC1B3, GUCB3, GUCSB3, GUCY1B1                                           |   |
| GUF1    | GUF1 GTPase homolog                                                                    | EF-4                                                                                          |   |
| GULP1   | GULF, engulfment adaptor FTD domain containing 1                                       | CED-6, CED6, GULP                                                                             |   |
| GUSBP1  | Glucuronidase, beta pseudogene 1                                                       |                                                                                               |   |
| GXYLT1  | Glucoside xylosyltransferase 1                                                         | GLT8D3                                                                                        |   |
| GYG2    | Glycogenin 2                                                                           | GN-2, GN2                                                                                     |   |
| GYPA    | Glycophorin A (MNS blood group)                                                        | CD235a, GFA, GPEAK, GPAT1, HGPMMV, HGPMMX1, UGzS6, CD230K, MNS, GPAS, G1D, G1TD, FAS-2, FAS-2 |   |
| GYPC    | Glycophorin C (Gerbich blood group)                                                    |                                                                                               |   |
| GYS2    | Glycogen synthase 2 (liver)                                                            |                                                                                               |   |
| H1F0    | H1 histone family, member 0                                                            | H10, H1FV                                                                                     |   |
| H2AFJ   | H2A histone family, member J                                                           | H2AJ                                                                                          |   |
| H2AFV   | H2A histone family, member V                                                           | H2A.Z-2, H2AV                                                                                 |   |
| H2AFZ   | H2A histone family, member Z                                                           | H2A.Z-1, H2A.z, H2A/z, H2AZ                                                                   |   |
| H3F3B   | H3 histone, family 3B (H3.3B)                                                          | H3.3B                                                                                         | v |
| H3F3C   | H3 histone, family 3C                                                                  | H3.5                                                                                          |   |
| H6PD    | Hexose-6-phosphate dehydrogenase (glucose 6-phosphate dehydrogenase)                   | RP3-510D11.3, CORTRD1, G6PDH, GDH                                                             |   |
| HABP2   | Hyaluronan binding protein 2                                                           | FSAP, HABP, HGFAL, PHBP                                                                       |   |
| HADHA   | Hydroxyacyl-CoA dehydrogenase/3-ketoacyl-CoA thiolase/3-methylcrotonyl-CoA carboxylase | ECHA, GDF, HADH, ECHH, ECHAD, MTPA, H-ALPHA                                                   |   |
| HADHB   | Hydroxyacyl-CoA dehydrogenase/3-ketoacyl-CoA thiolase/3-methylcrotonyl-CoA carboxylase | MSTP029, ECHB, MTPB, TP-BETA                                                                  |   |
| HAND2   | Hand and neural crest derivatives expressed 2                                          | DHAND2, Hed, Thing2, bHLHa26, dHand                                                           |   |
| HAO1    | Hydroxyacid oxidase (glycolate oxidase) 1                                              | GOX, GOX1, HAOX1                                                                              |   |
| HAPLN1  | Hyaluronan and proteoglycan link protein 1                                             | CRTL1                                                                                         |   |
| HAPLN4  | Hyaluronan and proteoglycan link protein 4                                             | BRAL2                                                                                         |   |
| HAR1A   | Highly accelerated region 1A (non-protein coding)                                      | HAR1F; LINC00064; NCRNA00064                                                                  |   |
| HAUS2   | HAUS augmin-like complex, subunit 2                                                    | C15orf25, CEP27, HsT17025                                                                     |   |
| HAUS3   | HAUS augmin-like complex, subunit 3                                                    | C4orf15, IT1, dgt3                                                                            |   |

|         |                                                                         |                                                                 |  |
|---------|-------------------------------------------------------------------------|-----------------------------------------------------------------|--|
| HAUS5   | HAUS augmin-like complex, subunit 5                                     | KIAA0841, dgt5                                                  |  |
| HAUS6   | HAUS augmin-like complex, subunit 6                                     | RP11-296P7.3, Dgt6, FAM29A                                      |  |
| HAVCR2  | Hepatitis A virus cellular receptor 2                                   | HAVcr-2, KIM-3, TIM3, TIMD-3, TIMD3, Tim-3                      |  |
| HBD     | Hemoglobin, delta                                                       |                                                                 |  |
| HBP1    | HMG-box transcription factor 1                                          |                                                                 |  |
| HBS1L   | HBS1-like translational GTPase                                          | RP11-349J5.1, EF-1a, ERFS, HBS1, HSPC276, eRF3c                 |  |
| HCFC1   | Host cell factor C1                                                     | CFF, HCF-1, HCF1, HFC1, MRX3, PPP1R89, VCA                      |  |
| HCFC2   | Host cell factor C2                                                     | HCF-2, HCF2                                                     |  |
| HCG11   | HLA complex group 11 (non-protein coding)                               | bK14H9.3                                                        |  |
| HCLS1   | hematopoietic cell-specific Lyn substrate 1                             | CTTNL, HS1, lckBP1, p75                                         |  |
| HCN1    | hyperpolarization activated cyclic nucleotide-gated potassium channel 1 | BCNG-1, BCNG1, EIEE24, HAC-2                                    |  |
| HCN2    | hyperpolarization activated cyclic nucleotide-gated potassium channel 2 | BCNG-2, BCNG2, HAC-1                                            |  |
| HCN4    | hyperpolarization activated cyclic nucleotide-gated potassium channel 4 | SSS2                                                            |  |
| HCP5    | LA complex P5 (non-protein coding)                                      | 6S2650E, D6S2650E, P5-1                                         |  |
| HCRTR2  | Hypocretin (orexin) receptor 2                                          | OX2R                                                            |  |
| HDAC4   | Histone deacetylase 4                                                   | ATTO5, BDMK, HIA0110, HD4, HDAC-4, HDAC-A, HDAC4                |  |
| HDAC6   | Histone deacetylase 6                                                   | JM21, CPBHM, HD6, PPP1R90                                       |  |
| HDAC8   | Histone deacetylase 8                                                   | CDA07, CDLS5, HD8, HDACL1, MRXS6, RPD3, WTS                     |  |
| HDAC9   | Histone deacetylase 9                                                   | HD7, HD7B, HD9, HDAC, HDAC7, HDAC7BB, HDAC9EL, HD9B, MTR, HDAC9 |  |
| HDGFRP3 | hepatoma-derived growth factor, related protein 3                       | CGI-142HDGF-2, HDGF2, HRP-3                                     |  |
| HDHD1A  | hematopoietic deacetylase-like hydrolase domain containing 1            | DXF68S1E, FAM16AX, GS1A, HDHD1                                  |  |
| HDX     | Highly divergent homeobox                                               | RP6-162O13.1, CXorf43, D030011N01Rik                            |  |
| HEATR2  | HEAT repeat containing 2                                                | CILD18                                                          |  |
| HEATR3  | HEAT repeat containing 3                                                | SYO1                                                            |  |
| HEATR7A |                                                                         |                                                                 |  |
| HEBP1   | Heme binding protein 1                                                  | HBP, HEBP                                                       |  |
| HECA    | Headcase homolog                                                        | HDC, HDCL, HHDC, dJ225E12.1                                     |  |
| HECTD2  | HECT domain containing E3 ubiquitin ligase 2                            | RP11-108M11.2                                                   |  |
| HECW1   | HECT, C2 and WW domain containing E3 ubiquitin ligase 1                 | NEDL1                                                           |  |
| HECW2   | HECT, C2 and WW domain containing E3 ubiquitin ligase 2                 | NEDL2                                                           |  |
| HEG1    | heart development protein with EGF-like domains 1                       | HEG, MST112, MSTP112                                            |  |
| HELLS   | Helicase, lymphoid-specific                                             | Nbla10143, LSH, PASG, SMARCA6                                   |  |
| HELZ    | Helicase with zinc finger                                               | DHRC, DRHC, HUMORF5                                             |  |

|         |                                                                                |                                                              |   |
|---------|--------------------------------------------------------------------------------|--------------------------------------------------------------|---|
| HEMGN   | Hemogen                                                                        | PRO1037, CT155, EDAG, EDAG-1, NDR                            |   |
| HEMK1   | HemK methyltransferase family member 1                                         | HEMK, MTQ1                                                   |   |
| HEPH    | Hephaestin                                                                     | RP13-238N7.1, CPL                                            |   |
| HEPHL1  | Hephaestin-like 1                                                              |                                                              |   |
| HEPN1   | Hepatocellular carcinoma, down-regulated 1                                     |                                                              |   |
| HERC2P2 | Hect domain and RLD 2 pseudogene 2                                             | D15F37S3, MN7                                                |   |
| HERC3   | HECT and RLD domain containing 3                                               |                                                              |   |
| HERC4   | HECT and RLD domain containing 4                                               | RP11-57G10.4                                                 |   |
| HERC6   | HECT and RLD domain containing 6                                               | RP11-10L7.1                                                  |   |
| HERPUD1 | Homocysteine-inducible, endoplasmic reticulum stress-inducible, ubiquitin-like | HERP, Mif1, SUP                                              | √ |
| HES2    | Hes family bHLH transcription factor 2                                         | bHLHb40                                                      |   |
| HES5    | Hes family bHLH transcription factor 5                                         | RP3-395M20.5, bHLHb38                                        |   |
| HEXIM1  | Hexamethylene bis-acetamide inducible 1                                        | CLP1, EDG1, HIS1, MAQ1                                       |   |
| HEY1    | Hes-related family bHLH transcription factor with YDDW motif 1                 | bHLHb51, CHP2, HERT2, HESK1, HKT-1, OAP1,                    | √ |
| HEY2    | Hes-related family bHLH transcription factor with YDDW motif 2                 | KPT2, JEL3, CHP1, GRIDLOCK, ORL, HERT1, HESB2, HRT2, bHLHb22 |   |
| HFE2    | Hemochromatosis type 2 (juvenile)                                              | HFE2A, HJV, JH, RGMC                                         |   |
| HGC6.3  | Uncharacterized LOC100128124                                                   |                                                              |   |
| HGF     | Hepatocyte growth factor (heparin-binding epidermal growth factor-like)        | DFNB39, F-TCFB, HPTA, SF, HGF                                |   |
| HGSNAT  | Heparan-6-sulfate N-acetyltransferase                                          | HGNAT, MPS3C, TMEM76                                         |   |
| HHAT    | Hedgehog acyltransferase                                                       | MART2, SKI1, Skn                                             |   |
| HHIP    | Hedgehog interacting protein                                                   | UNQ5825/PRO19644, HIP                                        |   |
| HHIPL1  | HHIP-like 1                                                                    | UNQ9245/PRO34761, KIAA1822, UNQ9245                          |   |
| HHLA1   | HERV-H LTR-associating 1                                                       | PLA2L                                                        |   |
| HHLA2   | HERV-H LTR-associating 2                                                       | B7H7                                                         |   |
| HIC2    | Hypermethylated in cancer 2                                                    | HRG22, ZBTB30, ZNF907                                        |   |
| HIF1AN  | Hypoxia inducible factor 1, alpha subunit inhibitor                            | FIH1                                                         |   |
| HIF3A   | Hypoxia inducible factor 3, alpha subunit                                      | HIF-3A, IPAS, MOP7, PASD7, bHLHe17                           |   |
| HIGD1A  | HIF1 hypoxia inducible domain family, member 1A                                | HSPC010, HIG1, RCF1a                                         |   |
| HIGD2A  | HIF1 hypoxia inducible domain family, member 2A                                | RCF1b                                                        |   |
| HINT3   | Histidine triad nucleotide binding protein 3                                   | HINT4                                                        |   |
| HIP1R   | Huntingtin interacting protein 1 related                                       | HIP12, HIP3, ILWEQ                                           |   |
| HIPK1   | Homeodomain interacting protein kinase 1                                       | RP4-786G8.2, Myak, Nbak2                                     |   |
| HIPK2   | Homeodomain interacting protein kinase 2                                       | PRO0593                                                      |   |

|           |                                                                                              |                                                                                                                                 |   |
|-----------|----------------------------------------------------------------------------------------------|---------------------------------------------------------------------------------------------------------------------------------|---|
| HIST1H2BC | Histone cluster 1, H2bc                                                                      | H2B.1, H2B/l, H2BFL, dJ221C16.3                                                                                                 |   |
| HIST1H2BD | Histone cluster 1, H2bd                                                                      | H2B.1B, H2B/b, H2BFB, HIRIP2, dJ221C16.6                                                                                        |   |
| HIST1H2BN | Histone cluster 1, H2bn                                                                      | RP1-193B12.10-001, H2B/d, H2BFD                                                                                                 |   |
| HIST1H3D  | Histone cluster 1, H3d                                                                       | H3/b, H3FB                                                                                                                      |   |
| HIST2H4A  | Histone cluster 2, H4a                                                                       | FO108, H4, H4/n, H4F2, H4FN, HIST2H4                                                                                            |   |
| HIVEP1    | Human immunodeficiency virus type 1 enhancer-binding protein 1                               | KF5-451B15.2, CIRM, CRTBP1, GAA1, MDP-1, FRDIP-DE1, Schmitt-1, ZAS1, ZNF40, ZNF40A                                              |   |
| HK1       | Hexokinase 1                                                                                 | HK1-ta-tb, HK1-tc, HKD, HKI, HMSNR, HXK1, HK1                                                                                   |   |
| HK2       | Hexokinase 2                                                                                 | HKII, HXK2                                                                                                                      |   |
| HKR1      | HKR1, GLI-Krüppel zinc finger family member                                                  | ZNF875                                                                                                                          |   |
| HLA-A     | Major histocompatibility complex, class I, A                                                 | DAQB-90C11.16-002, HLAA                                                                                                         |   |
| HLA-B     | Major histocompatibility complex, class I, B                                                 | CDABP0067, AS, HLAB, SPDA1                                                                                                      |   |
| HLA-C     | Major histocompatibility complex, class I, C                                                 | AA04c-DCX10110.2, D6S204, HLA-F15, HLC-C, PSORS1                                                                                |   |
| HLA-DMB   | Major histocompatibility complex, class II, DMB                                              | DAAP-27A1.4, D6S221E, RING7                                                                                                     |   |
| HLA-DPA1  | Major histocompatibility complex, class II, DPA1                                             | DAAP-277G16.1, DP(W3), DP(W4), HLA-DP1A,                                                                                        |   |
| HLA-DQA1  | Major histocompatibility complex, class II, DQA1                                             | DAQP-109D16.7, DL1, UELIAC1, DQ-A1, GSE, HLA-DQA                                                                                |   |
| HLA-DQB2  | Major histocompatibility complex, class II, DQB2                                             | DAMA-367I24.2, HLA-DQB1, HLA-DXB                                                                                                |   |
| HLA-F     | Major histocompatibility complex, class I, F                                                 | DADB-68M4.2, CDA12, HLA-5.4, HLA-CDA12, HLA-F                                                                                   |   |
| HLA-G     | Major histocompatibility complex, class I, G                                                 | DADB-15K14.8, MHC-G                                                                                                             |   |
| HLA-J     | Major histocompatibility complex, class I, J                                                 | CDA12, D6S203, HLA-59, HLA-CDA12                                                                                                |   |
| HLA-L     | Major histocompatibility complex, class I, L (sequence)                                      | hCG_23770, HLA-92, HLA92, HLAL                                                                                                  |   |
| HLF       | Hepatic leukemia factor                                                                      |                                                                                                                                 | v |
| HLTF      | Helicase-like transcription factor                                                           | HIT110, HIT110A1, KMT60, SMARCA5, SMT2L3, ZP13-24UT7.0, H13, HM11, HM1A5, HM1A5-1, MSTR086, PSEN1, DSL2, SDB, SDBL1, dJ224C17.1 |   |
| HM13      | Histocompatibility (minor) 13                                                                |                                                                                                                                 |   |
| HMBOX1    | Homeobox containing 1                                                                        | HNF1LA, HOT1, PBHNF                                                                                                             |   |
| HMBS      | Hydroxymethylbilane synthase                                                                 | PBG-D, PBGD, PORC, UPS                                                                                                          |   |
| HMGA2     | High mobility group AT-hook 2                                                                | BABL, HMGI-C, HMGIC, LIPO, STQTL9                                                                                               | v |
| HMGB1     | High mobility group box 1                                                                    | RP11-550P23.1, HMG1, HMG3, SBP-1                                                                                                |   |
| HMGB2     | High mobility group box 2                                                                    | HMGB2                                                                                                                           |   |
| HMGB3     | High mobility group box 3                                                                    | HMG-2a, HMG-4, HMG2A, HMG4                                                                                                      |   |
| HMGCL     | 5-hydroxymethyl-5-methylglutaryl-CoA                                                         | HL                                                                                                                              |   |
| HMGCLL1   | 5-hydroxymethyl-5-methylglutaryl-CoA                                                         | RP11-418P12.1, bA418P12.1, er-cHL                                                                                               |   |
| HMGCS1    | 5-hydroxy-5-methylglutaryl-CoA synthase 1 (high mobility group nucleosomal binding domain 2) | HMGCS                                                                                                                           |   |
| HMGN2     |                                                                                              | HMG17                                                                                                                           |   |

|           |                                                                          |                                                                                                                                                                                                                                                                                                                                                                                                                                                                                                                                                                                                                                                                                                                                                                                                                                                                                                                                                                                                                                                                                                                                                                                                                                                                                                                           |   |
|-----------|--------------------------------------------------------------------------|---------------------------------------------------------------------------------------------------------------------------------------------------------------------------------------------------------------------------------------------------------------------------------------------------------------------------------------------------------------------------------------------------------------------------------------------------------------------------------------------------------------------------------------------------------------------------------------------------------------------------------------------------------------------------------------------------------------------------------------------------------------------------------------------------------------------------------------------------------------------------------------------------------------------------------------------------------------------------------------------------------------------------------------------------------------------------------------------------------------------------------------------------------------------------------------------------------------------------------------------------------------------------------------------------------------------------|---|
| HMGXB4    | HMG box domain containing 4                                              | RP3-510H16.1, HMG2L1, HMGBCG, THC211630                                                                                                                                                                                                                                                                                                                                                                                                                                                                                                                                                                                                                                                                                                                                                                                                                                                                                                                                                                                                                                                                                                                                                                                                                                                                                   |   |
| HMX1      | H6 family homeobox 1                                                     | H6, NKX5-3                                                                                                                                                                                                                                                                                                                                                                                                                                                                                                                                                                                                                                                                                                                                                                                                                                                                                                                                                                                                                                                                                                                                                                                                                                                                                                                |   |
| HNF1B     | HNF1 homeobox B                                                          | HNF1B, HNF1B-1B, HNF1Bbeta, HNF1Z, HNF1T, LF-B3, LEP2, MODY5, TCF2, TCF2, VUNF1                                                                                                                                                                                                                                                                                                                                                                                                                                                                                                                                                                                                                                                                                                                                                                                                                                                                                                                                                                                                                                                                                                                                                                                                                                           |   |
| HNF4G     | Hepatocyte nuclear factor 4, gamma                                       | NR2A2, NR2A3                                                                                                                                                                                                                                                                                                                                                                                                                                                                                                                                                                                                                                                                                                                                                                                                                                                                                                                                                                                                                                                                                                                                                                                                                                                                                                              |   |
| HNMT      | Histamine N-methyltransferase                                            | HMT-S1, HNMT-S2, HNMT                                                                                                                                                                                                                                                                                                                                                                                                                                                                                                                                                                                                                                                                                                                                                                                                                                                                                                                                                                                                                                                                                                                                                                                                                                                                                                     |   |
| HNRNPA0   | Heterogeneous nuclear ribonucleoprotein A0                               | HNRPA0                                                                                                                                                                                                                                                                                                                                                                                                                                                                                                                                                                                                                                                                                                                                                                                                                                                                                                                                                                                                                                                                                                                                                                                                                                                                                                                    |   |
| HNRNPA1   | Heterogeneous nuclear ribonucleoprotein A1                               | AL519, AL520, HNRK1A1, HNRK1A1L3, HNRK1A1L5, HNRK1A1L7, HNRK1A2, HNRK1A1, HNRK1A2, HNRK1A2D1, HNRK1A2D2, HNRK1A2D3, HNRK1A2D4, HNRK1A2D5, HNRK1A2D6, HNRK1A2D7, HNRK1A2D8, HNRK1A2D9, HNRK1A2D10, HNRK1A2D11, HNRK1A2D12, HNRK1A2D13, HNRK1A2D14, HNRK1A2D15, HNRK1A2D16, HNRK1A2D17, HNRK1A2D18, HNRK1A2D19, HNRK1A2D20, HNRK1A2D21, HNRK1A2D22, HNRK1A2D23, HNRK1A2D24, HNRK1A2D25, HNRK1A2D26, HNRK1A2D27, HNRK1A2D28, HNRK1A2D29, HNRK1A2D30, HNRK1A2D31, HNRK1A2D32, HNRK1A2D33, HNRK1A2D34, HNRK1A2D35, HNRK1A2D36, HNRK1A2D37, HNRK1A2D38, HNRK1A2D39, HNRK1A2D40, HNRK1A2D41, HNRK1A2D42, HNRK1A2D43, HNRK1A2D44, HNRK1A2D45, HNRK1A2D46, HNRK1A2D47, HNRK1A2D48, HNRK1A2D49, HNRK1A2D50, HNRK1A2D51, HNRK1A2D52, HNRK1A2D53, HNRK1A2D54, HNRK1A2D55, HNRK1A2D56, HNRK1A2D57, HNRK1A2D58, HNRK1A2D59, HNRK1A2D60, HNRK1A2D61, HNRK1A2D62, HNRK1A2D63, HNRK1A2D64, HNRK1A2D65, HNRK1A2D66, HNRK1A2D67, HNRK1A2D68, HNRK1A2D69, HNRK1A2D70, HNRK1A2D71, HNRK1A2D72, HNRK1A2D73, HNRK1A2D74, HNRK1A2D75, HNRK1A2D76, HNRK1A2D77, HNRK1A2D78, HNRK1A2D79, HNRK1A2D80, HNRK1A2D81, HNRK1A2D82, HNRK1A2D83, HNRK1A2D84, HNRK1A2D85, HNRK1A2D86, HNRK1A2D87, HNRK1A2D88, HNRK1A2D89, HNRK1A2D90, HNRK1A2D91, HNRK1A2D92, HNRK1A2D93, HNRK1A2D94, HNRK1A2D95, HNRK1A2D96, HNRK1A2D97, HNRK1A2D98, HNRK1A2D99, HNRK1A2D100 |   |
| HNRNPA2B1 | Heterogeneous nuclear ribonucleoprotein A2/B1                            | HNRNPA2, HNRNPA1, HNRNPA2, HNRNPA2D1, HNRNPA2D2, HNRNPA2D3, HNRNPA2D4, HNRNPA2D5, HNRNPA2D6, HNRNPA2D7, HNRNPA2D8, HNRNPA2D9, HNRNPA2D10, HNRNPA2D11, HNRNPA2D12, HNRNPA2D13, HNRNPA2D14, HNRNPA2D15, HNRNPA2D16, HNRNPA2D17, HNRNPA2D18, HNRNPA2D19, HNRNPA2D20, HNRNPA2D21, HNRNPA2D22, HNRNPA2D23, HNRNPA2D24, HNRNPA2D25, HNRNPA2D26, HNRNPA2D27, HNRNPA2D28, HNRNPA2D29, HNRNPA2D30, HNRNPA2D31, HNRNPA2D32, HNRNPA2D33, HNRNPA2D34, HNRNPA2D35, HNRNPA2D36, HNRNPA2D37, HNRNPA2D38, HNRNPA2D39, HNRNPA2D40, HNRNPA2D41, HNRNPA2D42, HNRNPA2D43, HNRNPA2D44, HNRNPA2D45, HNRNPA2D46, HNRNPA2D47, HNRNPA2D48, HNRNPA2D49, HNRNPA2D50, HNRNPA2D51, HNRNPA2D52, HNRNPA2D53, HNRNPA2D54, HNRNPA2D55, HNRNPA2D56, HNRNPA2D57, HNRNPA2D58, HNRNPA2D59, HNRNPA2D60, HNRNPA2D61, HNRNPA2D62, HNRNPA2D63, HNRNPA2D64, HNRNPA2D65, HNRNPA2D66, HNRNPA2D67, HNRNPA2D68, HNRNPA2D69, HNRNPA2D70, HNRNPA2D71, HNRNPA2D72, HNRNPA2D73, HNRNPA2D74, HNRNPA2D75, HNRNPA2D76, HNRNPA2D77, HNRNPA2D78, HNRNPA2D79, HNRNPA2D80, HNRNPA2D81, HNRNPA2D82, HNRNPA2D83, HNRNPA2D84, HNRNPA2D85, HNRNPA2D86, HNRNPA2D87, HNRNPA2D88, HNRNPA2D89, HNRNPA2D90, HNRNPA2D91, HNRNPA2D92, HNRNPA2D93, HNRNPA2D94, HNRNPA2D95, HNRNPA2D96, HNRNPA2D97, HNRNPA2D98, HNRNPA2D99, HNRNPA2D100                                                         | √ |
| HNRNPA3   | Heterogeneous nuclear ribonucleoprotein A3                               | 2610510D13Rik, D10S102, FBRNP, HNRPA3                                                                                                                                                                                                                                                                                                                                                                                                                                                                                                                                                                                                                                                                                                                                                                                                                                                                                                                                                                                                                                                                                                                                                                                                                                                                                     |   |
| HNRNPA3P1 | Heterogeneous nuclear ribonucleoprotein A3P1                             | D10S102, FBRNP, HNRPA3, HNRPA3P1                                                                                                                                                                                                                                                                                                                                                                                                                                                                                                                                                                                                                                                                                                                                                                                                                                                                                                                                                                                                                                                                                                                                                                                                                                                                                          |   |
| HNRNPC    | Heterogeneous nuclear ribonucleoprotein C (C1/C2)                        | C1, C2, HNRNP, HNRPC, SNRPC                                                                                                                                                                                                                                                                                                                                                                                                                                                                                                                                                                                                                                                                                                                                                                                                                                                                                                                                                                                                                                                                                                                                                                                                                                                                                               |   |
| HNRNPD    | Heterogeneous nuclear ribonucleoprotein D (AUF1)                         | AUF1, AUF1A, HNRPD, P37, hnRNPD0                                                                                                                                                                                                                                                                                                                                                                                                                                                                                                                                                                                                                                                                                                                                                                                                                                                                                                                                                                                                                                                                                                                                                                                                                                                                                          |   |
| HNRNPH1   | Heterogeneous nuclear ribonucleoprotein H1                               | HNRPH, HNRPH1, hnRNPH                                                                                                                                                                                                                                                                                                                                                                                                                                                                                                                                                                                                                                                                                                                                                                                                                                                                                                                                                                                                                                                                                                                                                                                                                                                                                                     |   |
| HNRNPH3   | Heterogeneous nuclear ribonucleoprotein H3                               | 2H9, HNRPH3                                                                                                                                                                                                                                                                                                                                                                                                                                                                                                                                                                                                                                                                                                                                                                                                                                                                                                                                                                                                                                                                                                                                                                                                                                                                                                               |   |
| HNRNPK    | Heterogeneous nuclear ribonucleoprotein K                                | RP11-575L7.1, CSBP, HNRPK, TUNP                                                                                                                                                                                                                                                                                                                                                                                                                                                                                                                                                                                                                                                                                                                                                                                                                                                                                                                                                                                                                                                                                                                                                                                                                                                                                           |   |
| HNRNPU    | Heterogeneous nuclear ribonucleoprotein U (scaffold attachment factor A) | RP11-11N7.3, HNRPU, SAF-A, U21.1, hnRNP U                                                                                                                                                                                                                                                                                                                                                                                                                                                                                                                                                                                                                                                                                                                                                                                                                                                                                                                                                                                                                                                                                                                                                                                                                                                                                 |   |
| HOMER2    | Homer homolog 2 (Drosophila)                                             | ACPD, CPD, HOMER-2, VESL-                                                                                                                                                                                                                                                                                                                                                                                                                                                                                                                                                                                                                                                                                                                                                                                                                                                                                                                                                                                                                                                                                                                                                                                                                                                                                                 |   |
| HOOK1     | Hook microtubule-tethering protein 1                                     | HK1                                                                                                                                                                                                                                                                                                                                                                                                                                                                                                                                                                                                                                                                                                                                                                                                                                                                                                                                                                                                                                                                                                                                                                                                                                                                                                                       |   |
| HOOK3     | Hook microtubule-tethering protein 3                                     | HK3                                                                                                                                                                                                                                                                                                                                                                                                                                                                                                                                                                                                                                                                                                                                                                                                                                                                                                                                                                                                                                                                                                                                                                                                                                                                                                                       | √ |
| HOXA1     | Homeobox A1                                                              | BSAS, HOX1, HOX1F                                                                                                                                                                                                                                                                                                                                                                                                                                                                                                                                                                                                                                                                                                                                                                                                                                                                                                                                                                                                                                                                                                                                                                                                                                                                                                         |   |
| HOXA11    | Homeobox A11                                                             | HOX1, HOX1I                                                                                                                                                                                                                                                                                                                                                                                                                                                                                                                                                                                                                                                                                                                                                                                                                                                                                                                                                                                                                                                                                                                                                                                                                                                                                                               | √ |
| HOXA3     | Homeobox A3                                                              | HOX1, HOX1E                                                                                                                                                                                                                                                                                                                                                                                                                                                                                                                                                                                                                                                                                                                                                                                                                                                                                                                                                                                                                                                                                                                                                                                                                                                                                                               |   |
| HOXA7     | Homeobox A7                                                              | ANTP, HOX1, HOX1.1, HOX1A                                                                                                                                                                                                                                                                                                                                                                                                                                                                                                                                                                                                                                                                                                                                                                                                                                                                                                                                                                                                                                                                                                                                                                                                                                                                                                 |   |
| HOXB4     | Homeobox B4                                                              | HOX-2.6, HOX2, HOX2F                                                                                                                                                                                                                                                                                                                                                                                                                                                                                                                                                                                                                                                                                                                                                                                                                                                                                                                                                                                                                                                                                                                                                                                                                                                                                                      |   |
| HOXB5     | Homeobox B5                                                              | HHO.C10, HOX2, HOX2A, HU-1, Hox2.1                                                                                                                                                                                                                                                                                                                                                                                                                                                                                                                                                                                                                                                                                                                                                                                                                                                                                                                                                                                                                                                                                                                                                                                                                                                                                        |   |
| HOXB8     | Homeobox B8                                                              | HOX2, HOX2D, Hox-2.4                                                                                                                                                                                                                                                                                                                                                                                                                                                                                                                                                                                                                                                                                                                                                                                                                                                                                                                                                                                                                                                                                                                                                                                                                                                                                                      |   |
| HOXB9     | Homeobox B9                                                              | HOX-2.5, HOX2, HOX2E                                                                                                                                                                                                                                                                                                                                                                                                                                                                                                                                                                                                                                                                                                                                                                                                                                                                                                                                                                                                                                                                                                                                                                                                                                                                                                      |   |
| HOXC11    | Homeobox C11                                                             | HOX3H                                                                                                                                                                                                                                                                                                                                                                                                                                                                                                                                                                                                                                                                                                                                                                                                                                                                                                                                                                                                                                                                                                                                                                                                                                                                                                                     | √ |
| HOXC13    | Homeobox C13                                                             | ECTD9, HOX3, HOX3G                                                                                                                                                                                                                                                                                                                                                                                                                                                                                                                                                                                                                                                                                                                                                                                                                                                                                                                                                                                                                                                                                                                                                                                                                                                                                                        | √ |
| HOXC5     | Homeobox C5                                                              | CP11, HOX3, HOX3D                                                                                                                                                                                                                                                                                                                                                                                                                                                                                                                                                                                                                                                                                                                                                                                                                                                                                                                                                                                                                                                                                                                                                                                                                                                                                                         |   |
| HOXC8     | Homeobox C8                                                              | HOX4, HOX4E, HOX5.4                                                                                                                                                                                                                                                                                                                                                                                                                                                                                                                                                                                                                                                                                                                                                                                                                                                                                                                                                                                                                                                                                                                                                                                                                                                                                                       |   |
| HOXD1     | Homeobox D1                                                              | HOX4, HOX4G, Hox-4.7                                                                                                                                                                                                                                                                                                                                                                                                                                                                                                                                                                                                                                                                                                                                                                                                                                                                                                                                                                                                                                                                                                                                                                                                                                                                                                      |   |
| HOXD10    | Homeobox D10                                                             | HOX4, HOX4D, HOX4E, Hox-4.4                                                                                                                                                                                                                                                                                                                                                                                                                                                                                                                                                                                                                                                                                                                                                                                                                                                                                                                                                                                                                                                                                                                                                                                                                                                                                               |   |

|          |                                                                               |                                                                                                                                                                                                                                                                                                                                                                                                                                                                                                                                                                                                                                                                                                                                                                                                                                                                                                                                                                                                                                                                                                                                                                                                                                                                                                                                                                 |  |
|----------|-------------------------------------------------------------------------------|-----------------------------------------------------------------------------------------------------------------------------------------------------------------------------------------------------------------------------------------------------------------------------------------------------------------------------------------------------------------------------------------------------------------------------------------------------------------------------------------------------------------------------------------------------------------------------------------------------------------------------------------------------------------------------------------------------------------------------------------------------------------------------------------------------------------------------------------------------------------------------------------------------------------------------------------------------------------------------------------------------------------------------------------------------------------------------------------------------------------------------------------------------------------------------------------------------------------------------------------------------------------------------------------------------------------------------------------------------------------|--|
| HOXD3    | Homeobox D3                                                                   | HOX1D, HOX4, HOX4A, Hox-4.1                                                                                                                                                                                                                                                                                                                                                                                                                                                                                                                                                                                                                                                                                                                                                                                                                                                                                                                                                                                                                                                                                                                                                                                                                                                                                                                                     |  |
| HOXD8    | Homeobox D8                                                                   | HOX4, HOX4E, HOX5.4                                                                                                                                                                                                                                                                                                                                                                                                                                                                                                                                                                                                                                                                                                                                                                                                                                                                                                                                                                                                                                                                                                                                                                                                                                                                                                                                             |  |
| HP1BP3   | Heterochromatin protein 1, binding protein 3                                  | RP5-930J4.3, HP1-BP74                                                                                                                                                                                                                                                                                                                                                                                                                                                                                                                                                                                                                                                                                                                                                                                                                                                                                                                                                                                                                                                                                                                                                                                                                                                                                                                                           |  |
| HPCAL4   | Hippocalcin like 4                                                            | HLP4                                                                                                                                                                                                                                                                                                                                                                                                                                                                                                                                                                                                                                                                                                                                                                                                                                                                                                                                                                                                                                                                                                                                                                                                                                                                                                                                                            |  |
| HPGD     | Hydroxyprostaglandin dehydrogenase 15-(NADP)                                  | 15-PGDH, PGDH, PGDH1, PHOAR1, SDR36C1                                                                                                                                                                                                                                                                                                                                                                                                                                                                                                                                                                                                                                                                                                                                                                                                                                                                                                                                                                                                                                                                                                                                                                                                                                                                                                                           |  |
| HPRT1    | Hypoxanthine phosphoribosyltransferase 1                                      | HGPRT, HPRT                                                                                                                                                                                                                                                                                                                                                                                                                                                                                                                                                                                                                                                                                                                                                                                                                                                                                                                                                                                                                                                                                                                                                                                                                                                                                                                                                     |  |
| HPS3     | Hermansky-Pudlak syndrome 3                                                   | SUTAL                                                                                                                                                                                                                                                                                                                                                                                                                                                                                                                                                                                                                                                                                                                                                                                                                                                                                                                                                                                                                                                                                                                                                                                                                                                                                                                                                           |  |
| HPS4     | Hermansky-Pudlak syndrome 4                                                   | CTB-1048E9.4, LE                                                                                                                                                                                                                                                                                                                                                                                                                                                                                                                                                                                                                                                                                                                                                                                                                                                                                                                                                                                                                                                                                                                                                                                                                                                                                                                                                |  |
| HPS5     | Hermansky-Pudlak syndrome 5                                                   | AIBP63                                                                                                                                                                                                                                                                                                                                                                                                                                                                                                                                                                                                                                                                                                                                                                                                                                                                                                                                                                                                                                                                                                                                                                                                                                                                                                                                                          |  |
| HPSE2    | Heparanase 2 (inactive)                                                       | HPA2, HPR2, UFS, UFS1                                                                                                                                                                                                                                                                                                                                                                                                                                                                                                                                                                                                                                                                                                                                                                                                                                                                                                                                                                                                                                                                                                                                                                                                                                                                                                                                           |  |
| HR       | Hair growth associated                                                        | ALUNC, AU, HSA277165, HYPT4, MUHH, MUHH1                                                                                                                                                                                                                                                                                                                                                                                                                                                                                                                                                                                                                                                                                                                                                                                                                                                                                                                                                                                                                                                                                                                                                                                                                                                                                                                        |  |
| HRASLS5  | HRAS-like suppressor family, member 5                                         | HRLP5, HRSL5, RLP1, iNAT                                                                                                                                                                                                                                                                                                                                                                                                                                                                                                                                                                                                                                                                                                                                                                                                                                                                                                                                                                                                                                                                                                                                                                                                                                                                                                                                        |  |
| HRCT1    | Histidine rich carboxyl terminus 1                                            | RP11-327L3.6, LGLL338, PRO537, UNQ338                                                                                                                                                                                                                                                                                                                                                                                                                                                                                                                                                                                                                                                                                                                                                                                                                                                                                                                                                                                                                                                                                                                                                                                                                                                                                                                           |  |
| HRH1     | Histamine receptor H1                                                         | H1-R, hisH1                                                                                                                                                                                                                                                                                                                                                                                                                                                                                                                                                                                                                                                                                                                                                                                                                                                                                                                                                                                                                                                                                                                                                                                                                                                                                                                                                     |  |
| HRH4     | Histamine receptor H4                                                         | AXOR35, BG26, GPCR105, GPRv53, H4, H4R, HH4R                                                                                                                                                                                                                                                                                                                                                                                                                                                                                                                                                                                                                                                                                                                                                                                                                                                                                                                                                                                                                                                                                                                                                                                                                                                                                                                    |  |
| HS2ST1   | Heparan sulfate 2-O-sulfotransferase 1                                        | dJ604K5.2                                                                                                                                                                                                                                                                                                                                                                                                                                                                                                                                                                                                                                                                                                                                                                                                                                                                                                                                                                                                                                                                                                                                                                                                                                                                                                                                                       |  |
| HS3ST2   | Heparan sulfate 2-O-sulfotransferase                                          |                                                                                                                                                                                                                                                                                                                                                                                                                                                                                                                                                                                                                                                                                                                                                                                                                                                                                                                                                                                                                                                                                                                                                                                                                                                                                                                                                                 |  |
| HS3ST3A1 | Heparan sulfate (glucosamine) 3-O-sulfotransferase 3A1                        | UNQ2551/PRO6180, 30ST3A1, 3OST3A1                                                                                                                                                                                                                                                                                                                                                                                                                                                                                                                                                                                                                                                                                                                                                                                                                                                                                                                                                                                                                                                                                                                                                                                                                                                                                                                               |  |
| HS6ST1   | Heparan sulfate 6-O-sulfotransferase 1                                        | HH15, HS6ST                                                                                                                                                                                                                                                                                                                                                                                                                                                                                                                                                                                                                                                                                                                                                                                                                                                                                                                                                                                                                                                                                                                                                                                                                                                                                                                                                     |  |
| HS6ST3   | heparan sulfate 6-O-sulfotransferase 3                                        | RP11-235O20.1, HS6ST-3                                                                                                                                                                                                                                                                                                                                                                                                                                                                                                                                                                                                                                                                                                                                                                                                                                                                                                                                                                                                                                                                                                                                                                                                                                                                                                                                          |  |
| HSBP1L1  | Heat shock factor binding protein 1-like 1                                    |                                                                                                                                                                                                                                                                                                                                                                                                                                                                                                                                                                                                                                                                                                                                                                                                                                                                                                                                                                                                                                                                                                                                                                                                                                                                                                                                                                 |  |
| HSD11B1  | Hydroxysteroid (11-beta) dehydrogenase 1                                      | 11-BD1, 11-beta-HSD1, CORTKD2, HDL, HSD11, HSD11B, HSD11L, SDR36C1                                                                                                                                                                                                                                                                                                                                                                                                                                                                                                                                                                                                                                                                                                                                                                                                                                                                                                                                                                                                                                                                                                                                                                                                                                                                                              |  |
| HSD17B1  | Hydroxysteroid (17-beta) dehydrogenase 1                                      | EDH17B2, EDHB17, HSD17, SDR28C1                                                                                                                                                                                                                                                                                                                                                                                                                                                                                                                                                                                                                                                                                                                                                                                                                                                                                                                                                                                                                                                                                                                                                                                                                                                                                                                                 |  |
| HSD17B11 | Hydroxysteroid (17-beta) dehydrogenase 11                                     | 17B-HSD11, HSD17B11, HSD17B11.1, HSD17B11.2, HSD17B11.3, HSD17B11.4, HSD17B11.5, HSD17B11.6, HSD17B11.7, HSD17B11.8, HSD17B11.9, HSD17B11.10, HSD17B11.11, HSD17B11.12, HSD17B11.13, HSD17B11.14, HSD17B11.15, HSD17B11.16, HSD17B11.17, HSD17B11.18, HSD17B11.19, HSD17B11.20, HSD17B11.21, HSD17B11.22, HSD17B11.23, HSD17B11.24, HSD17B11.25, HSD17B11.26, HSD17B11.27, HSD17B11.28, HSD17B11.29, HSD17B11.30, HSD17B11.31, HSD17B11.32, HSD17B11.33, HSD17B11.34, HSD17B11.35, HSD17B11.36, HSD17B11.37, HSD17B11.38, HSD17B11.39, HSD17B11.40, HSD17B11.41, HSD17B11.42, HSD17B11.43, HSD17B11.44, HSD17B11.45, HSD17B11.46, HSD17B11.47, HSD17B11.48, HSD17B11.49, HSD17B11.50, HSD17B11.51, HSD17B11.52, HSD17B11.53, HSD17B11.54, HSD17B11.55, HSD17B11.56, HSD17B11.57, HSD17B11.58, HSD17B11.59, HSD17B11.60, HSD17B11.61, HSD17B11.62, HSD17B11.63, HSD17B11.64, HSD17B11.65, HSD17B11.66, HSD17B11.67, HSD17B11.68, HSD17B11.69, HSD17B11.70, HSD17B11.71, HSD17B11.72, HSD17B11.73, HSD17B11.74, HSD17B11.75, HSD17B11.76, HSD17B11.77, HSD17B11.78, HSD17B11.79, HSD17B11.80, HSD17B11.81, HSD17B11.82, HSD17B11.83, HSD17B11.84, HSD17B11.85, HSD17B11.86, HSD17B11.87, HSD17B11.88, HSD17B11.89, HSD17B11.90, HSD17B11.91, HSD17B11.92, HSD17B11.93, HSD17B11.94, HSD17B11.95, HSD17B11.96, HSD17B11.97, HSD17B11.98, HSD17B11.99, HSD17B11.100 |  |
| HSD17B12 | Hydroxysteroid (17-beta) dehydrogenase 12                                     | KAR, SDR12C1                                                                                                                                                                                                                                                                                                                                                                                                                                                                                                                                                                                                                                                                                                                                                                                                                                                                                                                                                                                                                                                                                                                                                                                                                                                                                                                                                    |  |
| HSD17B2  | Hydroxysteroid (17-beta) dehydrogenase 2                                      | EDH17B2, HSD17, SDR9C2                                                                                                                                                                                                                                                                                                                                                                                                                                                                                                                                                                                                                                                                                                                                                                                                                                                                                                                                                                                                                                                                                                                                                                                                                                                                                                                                          |  |
| HSD17B7  | Hydroxysteroid (17-beta) dehydrogenase 7                                      | RP11-331H2.1, PRAP, SDR37C1                                                                                                                                                                                                                                                                                                                                                                                                                                                                                                                                                                                                                                                                                                                                                                                                                                                                                                                                                                                                                                                                                                                                                                                                                                                                                                                                     |  |
| HSD3B1   | Hydroxy-delta-3-steroid dehydrogenase, 3-beta-oxo-delta-3-steroid isomerase 1 | RP5-920G3.4, 3BETAHSD, HSD3B, HSD3B1, HSD3B2, HSD3B3, HSD3B4, HSD3B5, HSD3B6, HSD3B7, HSD3B8, HSD3B9, HSD3B10, HSD3B11, HSD3B12, HSD3B13, HSD3B14, HSD3B15, HSD3B16, HSD3B17, HSD3B18, HSD3B19, HSD3B20, HSD3B21, HSD3B22, HSD3B23, HSD3B24, HSD3B25, HSD3B26, HSD3B27, HSD3B28, HSD3B29, HSD3B30, HSD3B31, HSD3B32, HSD3B33, HSD3B34, HSD3B35, HSD3B36, HSD3B37, HSD3B38, HSD3B39, HSD3B40, HSD3B41, HSD3B42, HSD3B43, HSD3B44, HSD3B45, HSD3B46, HSD3B47, HSD3B48, HSD3B49, HSD3B50, HSD3B51, HSD3B52, HSD3B53, HSD3B54, HSD3B55, HSD3B56, HSD3B57, HSD3B58, HSD3B59, HSD3B60, HSD3B61, HSD3B62, HSD3B63, HSD3B64, HSD3B65, HSD3B66, HSD3B67, HSD3B68, HSD3B69, HSD3B70, HSD3B71, HSD3B72, HSD3B73, HSD3B74, HSD3B75, HSD3B76, HSD3B77, HSD3B78, HSD3B79, HSD3B80, HSD3B81, HSD3B82, HSD3B83, HSD3B84, HSD3B85, HSD3B86, HSD3B87, HSD3B88, HSD3B89, HSD3B90, HSD3B91, HSD3B92, HSD3B93, HSD3B94, HSD3B95, HSD3B96, HSD3B97, HSD3B98, HSD3B99, HSD3B100                                                                                                                                                                                                                                                                                                                                                                                                        |  |
| HSDL1    | Hydroxysteroid dehydrogenase like 1                                           | SDR12C3                                                                                                                                                                                                                                                                                                                                                                                                                                                                                                                                                                                                                                                                                                                                                                                                                                                                                                                                                                                                                                                                                                                                                                                                                                                                                                                                                         |  |
| HSDL2    | Hydroxysteroid dehydrogenase like 2                                           | RP11-32M23.1, C9orf99, SDR13C1                                                                                                                                                                                                                                                                                                                                                                                                                                                                                                                                                                                                                                                                                                                                                                                                                                                                                                                                                                                                                                                                                                                                                                                                                                                                                                                                  |  |
| HSF2     | Heat shock transcription factor 2                                             | HSF 2, HSTF 2                                                                                                                                                                                                                                                                                                                                                                                                                                                                                                                                                                                                                                                                                                                                                                                                                                                                                                                                                                                                                                                                                                                                                                                                                                                                                                                                                   |  |
| HSF2BP   | Heat shock transcription factor 2 binding protein                             |                                                                                                                                                                                                                                                                                                                                                                                                                                                                                                                                                                                                                                                                                                                                                                                                                                                                                                                                                                                                                                                                                                                                                                                                                                                                                                                                                                 |  |
| HSFX1    | Heat shock transcription factor family, X-linked 1                            | hCG_27154, LW-1                                                                                                                                                                                                                                                                                                                                                                                                                                                                                                                                                                                                                                                                                                                                                                                                                                                                                                                                                                                                                                                                                                                                                                                                                                                                                                                                                 |  |

|           |                                                                |                                                                            |  |
|-----------|----------------------------------------------------------------|----------------------------------------------------------------------------|--|
| HSFY1     | Heat shock transcription factor, Y-linked 1                    | HSF2L, HSFY                                                                |  |
| HSFY2     | Heat shock transcription factor, Y-linked 2                    | HSF2L, HSFY                                                                |  |
| HSP90AB2P | Heat shock protein 90 kDa alpha (cytosolic), member 2          | HSP90BB                                                                    |  |
| HSP90B1   | Heat shock protein 90 kDa beta (Grp94), member 1               | ECGP, GP96, GRP94, HEL-S-125m, HEL35, TRA1                                 |  |
| HSPA12A   | Heat shock 70 kDa protein 12A                                  | RP11-539I5.1                                                               |  |
| HSPA12B   | Heat shock 70kD protein 12B                                    | RP5-1009E24.4, C20orf60, dJ1009E24.2                                       |  |
| HSPA13    | Heat shock protein 70 kDa family, member 13                    | STCH                                                                       |  |
| HSPA1B    | Heat shock 70 kDa protein 1B                                   | DAAP-21F2.7, HSP70-1B, HSP70-2                                             |  |
| HSPA1L    | Heat shock 70 kDa protein 1-like                               | DADB-555F21.3, HSF70-1L, HSF70-100M, HSF70L, hsm70L                        |  |
| HSPA5     | Heat shock 70 kDa protein 5 (glucose-corticoid-inducible)      | BIP, GRP78, HEL-S-89n, MIF2                                                |  |
| HSPB11    | Heat shock protein family B (small), member 11                 | HSPC034, C1orf41, HSPC034, IFT25, PP25                                     |  |
| HSPB3     | Heat shock 27 kDa protein 3                                    | DHMN2C, HMN2C, HSPL27                                                      |  |
| HSPC157   |                                                                |                                                                            |  |
| HSPC159   |                                                                |                                                                            |  |
| HSPH1     | Heat shock 105 kDa/110kDa protein 1                            | RP11-173F10.1, HSF105, HSF105A, HSF105B, HT-CO-25                          |  |
| HTATSF1   | HIV-1 Tat specific factor 1                                    | RP1-196E23.2, TAT-SF1, TATSF1, dJ196E23.2                                  |  |
| HTR1F     | 5-Hydroxytryptamine (serotonin) receptor 1F                    | 5-HT-1F, 5-HT1F, 5HT6, HTR1EL, MR77                                        |  |
| HTR2C     | 5-Hydroxytryptamine (serotonin) receptor 2C                    | RP11-810O3.1, 5-HT2C, 5-HTR2C, 5HTR2C, HTR1C                               |  |
| HTR4      | 5-Hydroxytryptamine (serotonin) receptor 4                     | 5-HT4, 5-HT4R                                                              |  |
| HTR7      | 5-Hydroxytryptamine (serotonin) receptor 7                     | RP11-103A2.1, 5-HT7                                                        |  |
| HTR7P1    | 5-Hydroxytryptamine (serotonin) receptor 7 pseudogene 1        |                                                                            |  |
| HTT       | Huntingtin                                                     | HD, IT15                                                                   |  |
| HUS1      | HUS1 checkpoint homolog (S. pombe)                             | tcag7.704, hHUS1                                                           |  |
| HUWE1     | HECT, UBA and WW domain containing E3 ubiquitin-protein ligase | RP5-559A16.4, ANF-DT1, HECT119, HSPC272, I0772, LASH1, MULE, UBE-D1, UBER1 |  |
| HVCN1     | Hydrogen voltage-gated channel 1                               | UNQ578/PRO1140, HV1, VSOP                                                  |  |
| HYAL2     | Hyaluronoglucosaminidase 2                                     | LUCA2                                                                      |  |
| HYAL4     | Hyaluronoglucosaminidase 4                                     | CSHY                                                                       |  |
| HYALP1    | Hyaluronoglucosaminidase pseudogene 1                          | tcag7.1303, HYAL6                                                          |  |
| HYOU1     | Hypoxia up-regulated 1                                         | GRP-170, Grp170, HSP12A, ORP-150, ORP150                                   |  |
| IAPP      | Islet amyloid polypeptide                                      | DAP, IAP                                                                   |  |
| ICA1L     | Islet cell autoantigen 1,69 kDa-like                           | ALS2CR14, ALS2CR15                                                         |  |
| ICK       | Intestinal cell (MAK-like) kinase                              | ECO, LCK2, MRK                                                             |  |
| ICMT      | Isoprenylcysteine carboxyl methyltransferase                   | RP1-120G22.4, HST1E14, MST1096, MST1096, FCCMT, ICMT, DBMT                 |  |



|        |                                                                        |                                                                                   |   |
|--------|------------------------------------------------------------------------|-----------------------------------------------------------------------------------|---|
| ICOSLG | Inducible T-cell co-stimulator ligand                                  | B7-H2, B7-H2, B7-1, B7-1, CD275, UL30, ICOS-L, ICOSL, ICOS                        |   |
| ICT1   | Immature colon carcinoma transcript 1                                  | DS-1, DS1, MRP-L58                                                                |   |
| ID4    | Inhibitor of DNA binding 4, dominant negative helix-loop-helix protein | IDB4, bHLHb27                                                                     |   |
| IDE    | Insulin-degrading enzyme                                               | RP11-366I13.1, INSULYSIN                                                          |   |
| IDH1   | Isocitrate dehydrogenase 1 (NADP+), soluble                            | HEL-216, HEL-S-26, IDCD, IDH, IDP, IDPC, PICD                                     | v |
| IDH3A  | Isocitrate dehydrogenase 3 (NAD+) alpha                                |                                                                                   |   |
| IDI1   | Isopentenyl-diphosphate delta isomerase 1                              | IPP1, IPPI1                                                                       |   |
| IDO2   | Indoleamine 2,3-dioxygenase 2                                          | INDOL1                                                                            |   |
| IDS    | Iduronate 2-sulfatase                                                  | MPS2, SIDS                                                                        |   |
| IER2   | Immediate early response 2                                             | ETR101                                                                            |   |
| IFFO1  | Intermediate filament family orphan 1                                  | HOM-TES-103, IFFO                                                                 |   |
| IFFO2  | Intermediate filament family orphan 2                                  | RP1-93P18.1                                                                       |   |
| IFI44L | Interferon-induced protein 44-like                                     | GS3686, C1orf29                                                                   |   |
| IFIT1  | Interferon-induced protein with tetratricopeptide repeats 1            | RP11-168G10.1, C50, G10F1, IFI50, IFI50K, IFI50, IFIT1, IFNA1, ISC56, P56, PNM561 |   |
| IFIT1B | Interferon-induced protein with tetratricopeptide repeats 1B           | Chromosome 10, NC_000010.11 (89378056..89385205)                                  |   |
| IFIT5  | Interferon-induced protein with tetratricopeptide repeats 5            | P58, RI58                                                                         |   |
| IFNA17 | Interferon, alpha 17                                                   | RP11-380P16.10-001, IFN-alphaI, IFNA, INFA, LEIF2C1                               |   |
| IFNA4  | Interferon, alpha 4                                                    | IFN-alpha4a, INFA4                                                                |   |
| IFNAR1 | Interferon (alpha, beta and omega) receptor 1                          | AVP, IFN-alpha-REC, IFNAR, IFNBR, IFRC                                            |   |
| IFNG   | Interferon gamma                                                       | IFG, IFI                                                                          |   |
| IFRD1  | Interferon-related developmental regulator 1                           | PC4, TIS7                                                                         |   |
| IFT172 | Intraflagellar transport 172                                           | NPHP17, SLB, SRTD10, osm-1, wim                                                   |   |
| IFT27  | Intraflagellar transport 27                                            | LL22NC01-132D12.2, BBS19, RABL4, RAYL                                             |   |
| IFT57  | Intraflagellar transport 57                                            | ESRRBL1, HIPPI, MHS4R2                                                            |   |
| IFT74  | Intraflagellar transport 74                                            | CCDC2, CMG-1, CMG1                                                                |   |
| IFT80  | Intraflagellar transport 80                                            | ATD2, SRTD2, WDR56                                                                |   |
| IFT81  | Intraflagellar transport 81                                            | CDV-1, CDV-1R, CDV1, CDV1R, DV1                                                   |   |
| IFT88  | Intraflagellar transport 88                                            | RP11-172H24.2, D15S1050E, DAF19, IG757, TTC10, IFT88                              |   |
| IGDCC3 | immunoglobulin superfamily, DCC subclass, member 3                     | HsT18880, PUNC                                                                    |   |
| IGDCC4 | immunoglobulin superfamily, DCC subclass, member 4                     | DDM36, NOPE                                                                       |   |
| IGF1   | insulin-like growth factor 1 (somatomedin C)                           | IGF-IA, IGFI, IGF1                                                                |   |
| IGF1R  | Insulin-like growth factor 1 receptor                                  | CD221, IGFIR, IGFR, JTK13                                                         |   |
| IGF2   | Insulin-like growth factor 2                                           | PP1446, C11orf43, IGF-II, PP9974                                                  |   |

|         |                                                                           |                                                                   |   |
|---------|---------------------------------------------------------------------------|-------------------------------------------------------------------|---|
| IGF2BP2 | Insulin-like growth factor 2 mRNA binding protein 2                       | IMP-2, IMP2, VICKZ2                                               |   |
| IGF2BP3 | Insulin-like growth factor 2 mRNA binding protein 3                       | CT98, IMP-3, IMP3, KOC, KOC1, VICKZ3                              |   |
| IGFBP3  | Insulin-like growth factor binding protein 3                              | tcag7.703, BP-53, IBP3                                            |   |
| IGFBP4  | Insulin-like growth factor binding protein 4                              | BP-4, HT29-IGFBP, IBP4, IGFBP-4                                   |   |
| IGFBP5  | Insulin-like growth factor binding protein 5                              | IBP5                                                              |   |
| IGFN1   | immunoglobulin-like and fibronectin type III domain-containing 1          | EEF1A2BP1                                                         |   |
| IGHD    | Immunoglobulin heavy constant delta                                       |                                                                   |   |
| IGHG1   | immunoglobulin heavy constant gamma 1 (C1q marker)                        |                                                                   |   |
| IGL@    |                                                                           |                                                                   | v |
| IGLL1   | Immunoglobulin lambda-like polypeptide 1                                  | I4.1, AGM2, CD179, IGL1, IGL2, IGLT4.1, IGLL, IGT1-IGYD9.1, VDPF2 |   |
| IGSF1   | Immunoglobulin superfamily, member 1                                      | IGSF1, IGYP2, VDPF2, IGCD1, IGDC1, INIB1, IGSP2, IGSP3            |   |
| IGSF11  | Immunoglobulin superfamily, member 11                                     | BT-IgSF, CT119, CXADRL1, Igsf13, VSIG3                            |   |
| IGSF5   | Immunoglobulin superfamily, member 5                                      | GSF5, JAM4                                                        |   |
| IGSF6   | Immunoglobulin superfamily, member 6                                      | DORA                                                              |   |
| IGSF9   | Immunoglobulin superfamily, member 9                                      | RP11-48O20.2, FP18798A, Nrt1, IGSF9                               |   |
| IKBIP   | IKKB interacting protein                                                  | IKIP                                                              |   |
| IKKB    | inhibitor of kappa light polypeptide gene enhancer in B-cells kinase beta | IKK-beta, IKK2, IKKB, IMD15, NFKBIKB                              |   |
| IKZF2   | IKAROS family zinc finger 2 (Helios)                                      | ANF1A2, HELIOS, ZNF1A2, ZNFN1A2                                   |   |
| IKZF4   | IKAROS family zinc finger 4 (Eos)                                         | EOS, ZNFN1A4                                                      |   |
| IKZF5   | IKAROS family zinc finger 5 (Pegasus)                                     | PEGASUS, ZNFN1A5                                                  |   |
| IL10    | Interleukin 10                                                            | RP11-262N9.1, CSIF, GVHDS, IL-10A, TGIF, IL10                     |   |
| IL10RA  | Interleukin 10 receptor, alpha                                            | CD210, CD210a, CDW210A, HIL-10R, IL-10R1, IL10R                   |   |
| IL12A   | Interleukin 12A                                                           | CLMF, IL-12A, NFSK, NKSF1, P35                                    |   |
| IL12B   | Interleukin 12b                                                           | CLMF, CLMF2, IL-12B, IMD28, IMD29, NKSF, NKSF2                    |   |
| IL12RB2 | Interleukin 12 receptor, beta 2                                           | RP11-102M16.1                                                     |   |
| IL13RA2 | Interleukin 13 receptor, alpha 2                                          | CD213A2, CT19, IL-13R, IL13BP                                     |   |
| IL15    | Interleukin 15                                                            | IL-15                                                             |   |
| IL16    | Interleukin 16                                                            | LCF, NIL16, PRIL16, prIL-16                                       |   |
| IL17RC  | Interleukin 17 receptor C                                                 | UNQ6118/PRO20040/PRO38901, IL17-RL, IL17RL                        |   |
| IL17RD  | Interleukin 17 receptor D                                                 | UNQ6115/PRO20026, HH18, IL-17RD, IL17RLM, SEF                     |   |
| IL17RE  | Interleukin 17 receptor E                                                 | UNQ3056/PRO9877                                                   |   |
| IL17REL | Interleukin 17 receptor E-like                                            | RP3-355C18.6                                                      |   |
| IL18R1  | Interleukin 18 receptor 1                                                 | CD218a, CDw218a, IL-1Rrp, IL18RA, IL1RRP                          |   |

|         |                                               |                                                                                        |   |
|---------|-----------------------------------------------|----------------------------------------------------------------------------------------|---|
| IL1A    | Interleukin 1, alpha                          | IL-1A, IL1, IL1-ALPHA, IL1F1                                                           |   |
| IL1B    | Interleukin 1, beta                           | IL-1, IL1-BETA, IL1F2                                                                  |   |
| IL1F5   |                                               |                                                                                        |   |
| IL1F8   |                                               |                                                                                        |   |
| IL1R1   | Interleukin 1 receptor, type I                | CD121A, D2S1473, IL-1R-alpha, IL1R, IL1RA, P80                                         |   |
| IL1RAP  | Interleukin 1 receptor accessory protein      | C3orf13, IL-1RAcP, IL1R3                                                               |   |
| IL2     | Interleukin 2                                 | IL-2, TCGF, lymphokine                                                                 | √ |
| IL20RB  | Interleukin 20 receptor beta                  | hCG_2022374, DIRS1, FNDC6, IL-20R2                                                     |   |
| IL21R   | Interleukin 21 receptor                       | UNQ3121/PRO10273, CD360, NILR                                                          | √ |
| IL22RA2 | Interleukin 22 receptor, alpha 2              | UNQ3195/PRO19598/PRO19822, CNF2-10, CNF2-31, CPE2X, IL-22RB, IL-22R-alpha-2, IL-22RA2  |   |
| IL23A   | Interleukin 23, alpha subunit p19             | UNQ2498/PRO5798, IL-23, IL-23A, IL23P19, P19, SGRF                                     |   |
| IL23R   | Interleukin 23 receptor                       |                                                                                        |   |
| IL24    | Interleukin 24                                | C49A, FISP, IL10B, MDA7, MOB5, ST16                                                    |   |
| IL25    | Interleukin 25                                | UNQ3120/PRO10272, IL17E                                                                |   |
| IL27RA  | Interleukin 27 receptor, alpha                | UNQ296/PRO336, CRL1, IL-27RA, IL27R, TCCR, WSX1, zcytor1                               |   |
| IL2RB   | Interleukin 2 receptor, beta                  | RP5-1170K4.6, CD122, IL15RB, P70-75                                                    |   |
| IL3     | Interleukin 3                                 | IL-3, MCGF, MULTI-CSF                                                                  |   |
| IL31    | Interleukin 31                                | IL-31                                                                                  |   |
| IL33    | Interleukin 33                                | KPT1-575C20.2, C90H20, DVS27, ILIT11, NF-HEV, NFEHEV                                   |   |
| IL6R    | Interleukin 6 receptor                        | CD126, IL-6R-1, IL-6RA, IL6QA, IL6RQ, gp80, IL6R                                       |   |
| IL6ST   | Interleukin 6 signal transducer               | CD130, CDW130, GP130, IL-6RB                                                           |   |
| IL7     | Interleukin 7                                 | IL-7                                                                                   |   |
| IL7R    | Interleukin 7 receptor                        | CD127, CDW127, IL-7R-alphaA, ILRA, IL7R                                                |   |
| IL8     |                                               |                                                                                        |   |
| ILDR1   | immunoglobulin-like domain containing         | DFNB42alpha, ILDR1alpha', ILDR1beta, ILDR1                                             |   |
| ILDR2   | immunoglobulin-like domain containing         | RP4-782G3.2, C1orf32, dJ782G3.1                                                        |   |
| ILF3    | Interleukin enhancer binding factor 3, 90 kDa | CD11, DNBP, DNBP70, MIMF4, MHCOS114, MIF4, NE-AT-00, NE110, NE110L, NE90, NE90L, NE90L |   |
| IMMP1L  | inner mitochondrial membrane                  | IMP1, IMP1-LIKE                                                                        |   |
| IMP3    | IMP3, U3 small nucleolar ribonucleoprotein    | BRMS2, C15orf12, MRPS4                                                                 |   |
| IMPA1   | Inositol(myo)-1(or 4)-monophosphatase 1       | IMP, IMPA                                                                              |   |
| IMPAD1  | Inositol monophosphatase domain containing    | GPAPP, IMP 3, IMP-3, IMPA3                                                             |   |
| IMPG1   | Interphotoreceptor matrix proteoglycan 1      | RP11-758J17.1, GP147, IPM150, SPACR                                                    |   |
| IMPG2   | Interphotoreceptor matrix proteoglycan 2      | IPM200, RP56, SPACRCAN                                                                 |   |

|         |                                                        |                                                               |  |
|---------|--------------------------------------------------------|---------------------------------------------------------------|--|
| INADL   | InaD-like (Drosophila)                                 | RP4-537K17.1, Cipp, InaD-like, PATJ, hINADL                   |  |
| INCENP  | Inner centromere protein antigens 135/155 kDa          |                                                               |  |
| ING1    | Inhibitor of growth family, member 1                   | RP11-8D7.1, p24ING1C, p55, p55ING1, p55ING1B, p47, p47ING1A   |  |
| ING3    | Inhibitor of growth family, member 3                   | HSPC301, Eaf4, ING2, MEAF4, p47ING3                           |  |
| ING5    | Inhibitor of growth family, member 5                   | p28ING5                                                       |  |
| INHBC   | Inhibin, beta C                                        | IHBC                                                          |  |
| INHBE   | Inhibin, beta E                                        |                                                               |  |
| INMT    | Indolethylamine N-methyltransferase                    | TEMT                                                          |  |
| INO80   | INO80 complex subunit                                  | INO80A, INOC1, hINO80                                         |  |
| INO80C  | INO80 complex subunit C                                | C18orf37, IES6, hIes6                                         |  |
| INO80D  | INO80 complex subunit D                                |                                                               |  |
| INPP4A  | Inositol polyphosphate-4-phosphatase, type I,          | INPP4, TVAS1                                                  |  |
| INPP4B  | Inositol polyphosphate-4-phosphatase, type II, 105 kDa |                                                               |  |
| INPP5A  | Inositol polyphosphate-5-phosphatase, 40 kDa           | RP11-288G11.1, 5PTASE                                         |  |
| INPP5E  | Inositol polyphosphate-5-phosphatase, 72 kDa           | CORS1, CPD4, JBTS1, MORMS, PPI5PIV                            |  |
| INPP5F  | Inositol polyphosphate-5-phosphatase F                 | MSTP007, MSTPO47, SAC2, hSAC2                                 |  |
| INSIG1  | Insulin induced gene 1                                 | CL-6, CL6                                                     |  |
| INSIG2  | Insulin induced gene 2                                 |                                                               |  |
| INSM1   | Insulinoma-associated 1                                | IA-1, IA1                                                     |  |
| INSR    | Insulin receptor                                       | CD220, HHF5                                                   |  |
| INTS2   | Integrator complex subunit 2                           | INT2, KIAA1287                                                |  |
| INTS3   | Integrator complex subunit 3                           | RP11-216N14.2, C1orf193, C1orf60, INT3, SOSS-A, SOSSA         |  |
| INTS4L1 | Integrator complex subunit 4-like 1                    |                                                               |  |
| INTS4L2 | Integrator complex subunit 4-like 2                    |                                                               |  |
| INTS6   | Integrator complex subunit 6                           | RP11-24B19.2, DBI-1, DDX26, DDX26A, DICE1, HDB, INT6, Notch12 |  |
| INTS7   | Integrator complex subunit 7                           | C1orf73, INT7                                                 |  |
| INTS8   | Integrator complex subunit 8                           | C8orf52, INT8                                                 |  |
| INTU    | Inturned planar cell polarity protein                  | INT, PDZD6, PDZK6                                             |  |
| INVS    | Inversin                                               | RP11-208F1.1, INV, NPH2, NPHP2                                |  |
| IP6K2   | Inositol hexakisphosphate kinase 2                     | TCCCIA00113, IHPK2, PIUS                                      |  |
| IPCEF1  | interaction protein for cytoskeleton exchange factor 1 | RP3-402L9.2, PIP3-E                                           |  |
| IPO5    | Importin 5                                             | RP11-72J7.1, IMB3, KPNB3, Pse1, RANBP5, imp5                  |  |
| IPO7    | Importin 7                                             | Imp7, RANBP7                                                  |  |

|          |                                                              |                                                                   |   |
|----------|--------------------------------------------------------------|-------------------------------------------------------------------|---|
| IPO8     | Importin 8                                                   | RANBP8                                                            |   |
| IPPK     | Inositol 1,3,4,5,6-pentakisphosphate 2-kinase                | C9orf12, INSP5K2, IP5K, IPK1, bA476B13.1                          |   |
| IPW      | imprinted in Prader-Willi syndrome (non-protein coding)      | NCRNA00002                                                        |   |
| IQCE     | IQ motif containing E                                        | 1700028P05Rik                                                     |   |
| IQCH     | IQ motif containing H                                        | NYDSP5                                                            |   |
| IQCK     | IQ motif containing K                                        |                                                                   |   |
| IQGAP1   | IQ motif containing GTPase activating protein 1              | HUMORFA01, SAR1, p195                                             |   |
| IQGAP2   | IQ motif containing GTPase activating protein 2              |                                                                   |   |
| IQSEC2   | IQ motif and Sec7 domain 2                                   | RP11-258C19.1, BRAG1, MRX1                                        |   |
| IQSEC3   | IQ motif and Sec7 domain 3                                   |                                                                   |   |
| IQUB     | IQ motif and ubiquitin domain containing                     |                                                                   |   |
| IRAK1BP1 | interleukin-1 receptor-associated kinase 1 binding protein 1 | AIP70, SIMPL                                                      |   |
| IRAK3    | Interleukin-1 receptor-associated kinase 3                   | ASRT5, IRAKM                                                      |   |
| IRAK4    | Interleukin-1 receptor-associated kinase 4                   | RP11-210N13.4, IPD1, IRAK-4, NY-REN-64, REN64                     |   |
| IREB2    | Iron-responsive element binding protein 2                    | ACO3, IRP2, IRP2AD                                                |   |
| IRF4     | Interferon regulatory factor 4                               | LSIRF, MUM1, NF-EM5                                               | √ |
| IRF5     | Interferon regulatory factor 5                               |                                                                   |   |
| IRF8     | Interferon regulatory factor 8                               | H-ICSBP, ICSBP, ICSBP1, IMD32A, IMD32B, IRF-8                     |   |
| IRGQ     | Immunity-related GTPase family, Q                            | FKSG271, IRGQ                                                     |   |
| IRS1     | Insulin receptor substrate 1                                 | HIRS-1                                                            |   |
| IRS2     | Insulin receptor substrate 2                                 | Irs-2                                                             |   |
| IRX1     | Iroquois homeobox 1                                          | IRX-5, IRXA1                                                      |   |
| ISCA1    | Iron-sulfur cluster assembly 1                               | GK004, HBLD2, ISA1, hIscA                                         |   |
| ISCA1P1  | Iron-sulfur cluster assembly 1 pseudogene 1                  |                                                                   |   |
| ISCA2    | Iron-sulfur cluster assembly 2                               | HBLD1, ISA2, c14_5557                                             |   |
| ISOC1    | Isochorismatase domain containing 1                          | CGI-111                                                           |   |
| ISPD     | Isoprenoid synthase domain containing                        | RP11-196O16.1, MDDGA7, Nip, hCG_1745121                           |   |
| ISX      | Intestine-specific homeobox                                  | Pix-1, RAXLX                                                      |   |
| ITCH     | Itchy E3 ubiquitin protein ligase                            | AIF4, AIP4, NAPP1, dJ468O1.1                                      |   |
| ITFG2    | Integrin alpha FG-GAP repeat containing 2                    | MDS028                                                            |   |
| ITFG3    | Integrin alpha FG-GAP repeat containing 3                    | C16orf9, gs19                                                     |   |
| ITGA2    | integrin, alpha 2 (CD49B, alpha 2 subunit of VLA-2 receptor) | BR, CD49B, GPIa, HPA-5, VLA-2, VLAA2                              |   |
| ITGA2B   | Integrin, alpha 2b (platelet glycoprotein IIb of             | BDT1T10, BDT1T12, CD41, CD41B, G12B, G110, G1, CTA, HPA2, PPP1D02 |   |

|          |                                                                                        |                                                                                                        |   |
|----------|----------------------------------------------------------------------------------------|--------------------------------------------------------------------------------------------------------|---|
| ITGA3    | Integrin, alpha 3 (antigen CD49C, alpha 3)                                             | CD49C, GAI-B3, GAI-B3, ILNEB, MSK16, VCA-2, VLA-2A, VLA-2B                                             |   |
| ITGA4    | Integrin, alpha 4 (antigen CD49D, alpha 4 subunit of VLA-4 complex)                    | CD49D, IA4                                                                                             |   |
| ITGA6    | Integrin, alpha 6                                                                      | CD49fB, VLA-6, ITGA6                                                                                   |   |
| ITGAD    | Integrin, alpha D                                                                      | ADB2, CD11D                                                                                            |   |
| ITGAL    | Integrin, alpha L (antigen CD11A (p180))                                               | CD11A, LFA-1, LFA1A                                                                                    |   |
| ITGAX    | Integrin, alpha X (component component 3)                                              | CD11C, SLEB6                                                                                           |   |
| ITGB1    | Integrin, beta 1 (fibronectin receptor, beta subunit of integrin CD29; includes MDEF2) | IT11-479GZ2.2, CD29, FNKB, GIIA, MDT2, MSK12, ICA1-BETA, ICA1-1B, ICA1-Talpha, ICA1-T, ICA1-TA, ICA1-B |   |
| ITGB1BP1 | Integrin beta 1 binding protein 1                                                      |                                                                                                        |   |
| ITGB3    | Integrin, beta 3 (platelet glycoprotein IIIa, antigen CD61)                            | BDPLT16, BDPLT2, CD61, GP3A, GPIIIa, GT                                                                |   |
| ITGB8    | Integrin, beta 8                                                                       |                                                                                                        |   |
| ITIH1    | Inter-alpha-trypsin inhibitor heavy chain 1                                            | H1P, IATIH, IGHEP1, ITI-HC1, ITIH, SHAP                                                                |   |
| ITIH5    | Inter-alpha-trypsin inhibitor heavy chain family member 5                              | PP14776, ITI-HC5                                                                                       |   |
| ITLN1    | Intelectin 1 (galactofuranose binding)                                                 | UNQ040/PRO1270, ILE-1, ILE1, INTL, ILEN, LFK, ILEL, ILENT                                              |   |
| ITM2C    | Integral membrane protein 2C                                                           | hucep-14, BRI3, BRICD2C, E25, E25C, ITM3                                                               |   |
| ITPKB    | Inositol-trisphosphate 3-kinase B                                                      | IP3-3KB, IP3K, IP3K-B, IP3KB, PIG37                                                                    |   |
| ITPR2    | Inositol 1,4,5-trisphosphate receptor, type 2                                          | CFAP48, IP3R2                                                                                          |   |
| ITPRIP   | Inositol 1,4,5-trisphosphate receptor                                                  | IT11-127L20.4, DANGLK, KIAA1734, UAT27L20, LA127L20.2                                                  |   |
| ITPRIPL2 | Inositol 1,4,5-trisphosphate receptor interacting protein like 2                       | C130081G24, E030018N11Rik                                                                              |   |
| ITSN1    | Intersectin 1 (SH3 domain protein)                                                     | ITSN, SH3D1A, SH3P17                                                                                   |   |
| ITSN2    | Intersectin 2                                                                          | PRO2015, SH3D1B, SH3P18, SWA, SWAP                                                                     |   |
| IVD      | Isovaleryl-CoA dehydrogenase                                                           | ACAD2                                                                                                  |   |
| IWS1     | IWS1 homolog (S. cerevisiae)                                                           |                                                                                                        |   |
| IYD      | Iodotyrosine deiodinase                                                                | C6orf71, DEHAL1, TDH4, dJ422F24.1                                                                      |   |
| JAK2     | Janus kinase 2                                                                         | JTK10, THCYT3                                                                                          | v |
| JAKMIP3  | Janus kinase and microtubule interacting protein 3                                     | IT11-140A10.0, C100H14, C100H39, Jamp3, NECC2, LA140A10.5                                              |   |
| JAM3     | Junctional adhesion molecule 3                                                         | UNQ859/PRO1868, JAM-2, JAM-3, JAM-C, JAMC                                                              |   |
| JARID2   | Jumonji, AT rich interactive domain 2                                                  | JMJ                                                                                                    |   |
| JAZF1    | JAZF zinc finger 1                                                                     | tcag7.981, TIP27, ZNF802                                                                               | v |
| JDP2     | Jun dimerization protein 2                                                             | JUNDM2                                                                                                 |   |
| JHDM1D   |                                                                                        |                                                                                                        |   |
| JKAMP    | JNK1/MAPK8-associated membrane protein                                                 | CDA06, C14orf100, HSPC213, HSPC327, JAMP                                                               |   |
| JMJD1C   | Jumonji domain containing 1C                                                           | RP11-10C13.2, TRIP8                                                                                    |   |
| JMJD5    |                                                                                        |                                                                                                        |   |

|         |                                                                    |                                                             |   |
|---------|--------------------------------------------------------------------|-------------------------------------------------------------|---|
| JMJD6   | Jumonji domain containing 6                                        | PSR, PTDSR, PTDSR1                                          |   |
| JMJD7   | Jumonji domain containing 7                                        | hCG_37726                                                   |   |
| JMY     | Junction mediating and regulatory protein, p53 cofactor            | WHDC1L3                                                     |   |
| JPH1    | Junctophilin 1                                                     | JP-1, JP1                                                   |   |
| JPH2    | Junctophilin 2                                                     | CMH17, JP-2, JP2                                            |   |
| JPH4    | Junctophilin 4                                                     | JP4, JPHL1                                                  |   |
| JRK     | Jrk homolog (mouse)                                                | JH8, jerky                                                  |   |
| JRKL    | JRK-like                                                           | HHMJG                                                       |   |
| JUN     | Jun proto-oncogene                                                 | AP-1, AP1, c-Jun                                            | v |
| KAL1    | Kallmann syndrome 1 sequence                                       | ADMLX, HH1, HHA, KAL, KALIG-1, KMS, WFDC19                  |   |
| KALRN   | kalirin, RhoGEF kinase                                             | KRT11-7/1117.7, ANKRD24, CHD3, CHD33, DCL1, DLG, HARP, TRAP |   |
| KANK1   | KN motif and ankyrin repeat domains 1                              | RP11-130C19.4, ANKRD15, CPSQ2, KANK                         |   |
| KANK2   | KN motif and ankyrin repeat domains 2                              | ANKRD25, MXRA3, SIP                                         |   |
| KAT2A   | K(lysine) acetyltransferase 2A                                     | GCN5, GCN5L2, PCAF-b, hGCN5                                 |   |
| KAT2B   | K(lysine) acetyltransferase 2B                                     | CAF, P/CAF, PCAF                                            |   |
| KATNAL1 | Katanin p60 subunit A-like 1                                       | RP11-374F3.1                                                |   |
| KAZ     | Kazrin, periplakin interacting protein                             | RP1-21O18.1, KAZ                                            |   |
| KAZALD1 | Kazal-type serine peptidase inhibitor domain                       | KRT11-108L7.10-001, DONO1, FKSO28, FKSO40, IOTD1, D10       |   |
| KBTBD11 | Kctd repeat and BTB (POZ) domain                                   | KLHDC7C                                                     |   |
| KBTBD12 | Kctd repeat and BTB (POZ) domain                                   | 4833415F11Rik, 4933428M03Rik, Klhdc6                        |   |
| KBTBD2  | Kctd repeat and BTB (POZ) domain                                   | CGI-73, BKLHD1                                              |   |
| KBTBD6  | Kctd repeat and BTB (POZ) domain                                   |                                                             |   |
| KBTBD7  | Kctd repeat and BTB (POZ) domain                                   |                                                             |   |
| KBTBD8  | Kctd repeat and BTB (POZ) domain containing 8                      | AU040152, SSEC-51, SSEC51, Takrp, mKIAA1842                 |   |
| KCMF1   | Potassium channel modulatory factor 1                              | DEBT91, FIGC, PCMF, ZZZ1                                    |   |
| KCNA1   | Potassium voltage-gated channel, shaker-related subfamily member 1 | ALMIX, EAT, HBN1, HUK1, KV1.1, MDK1, MK1, RPF1              |   |
| KCNA3   | Potassium voltage-gated channel, shaker-related subfamily member 3 | RP11-284N6.3, HOK3, HUK3, HUCNS, HUKM, KV1.3, MK2, PCN2     |   |
| KCNA6   | Potassium voltage-gated channel, shaker-related subfamily member 6 | HBK2, KV1.6, PPP1R96                                        |   |
| KCNA7   | Potassium voltage-gated channel, shaker-related subfamily member 7 | HAK6, KV1.7                                                 |   |
| KCNAB1  | Potassium voltage-gated channel, shaker-related subfamily member 1 | AKK0A3, KCNAB7, KV-BETA-1, KV01.3, HKVbeta3, KV-beta2       |   |
| KCNAB2  | Potassium voltage-gated channel, shaker-related subfamily member 2 | RP23-421E12.12-005, F5, I2rf5, Kcnb3, kv-beta-2             |   |
| KCNB1   | Potassium voltage-gated channel, Shaw-related subfamily member 1   | DRK1, KV2.1, h-DRK1                                         |   |
| KCNC2   | Potassium voltage-gated channel, Shaw-related subfamily member 2   | KV3.2                                                       |   |

|        |                                                                              |                                                                            |   |
|--------|------------------------------------------------------------------------------|----------------------------------------------------------------------------|---|
| KCNC4  | Potassium voltage-gated channel, Shaw-related family, member 4               | C1orf30, HKSHIIC, KSHIIC, KV3.4                                            |   |
| KCND2  | Potassium voltage-gated channel, Shaw-related family, member 2               | KV4.2, RK5                                                                 |   |
| KCNE1L | KCNE1-like                                                                   | RP1-136J15.2, KCNE5                                                        |   |
| KCNE2  | Potassium voltage-gated channel, Isk-related family, member 2                | ATFB4, LQT5, LQT6, MIRP1                                                   |   |
| KCNE3  | Potassium voltage-gated channel, Isk-related family, member 3                | HOKPP, HYPP, MiRP2                                                         |   |
| KCNE4  | Potassium voltage-gated channel, Isk-related family, member 4                | MIRP3                                                                      |   |
| KCNG1  | Potassium voltage-gated channel, subfamily G                                 | RP5-955M13.1, K13, KCNG, Kv6.1, kH2                                        |   |
| KCNG3  | Potassium voltage-gated channel, subfamily G                                 | KV10.1, KV6.3                                                              |   |
| KCNH1  | Potassium voltage-gated channel, subfamily H                                 | EAG, EAG1, Kv10.1, h-eag                                                   |   |
| KCNH8  | Potassium voltage-gated channel, subfamily H (ass-related), member 8         | ELK, ELK1, Kv12.1, elk3                                                    |   |
| KCNIP2 | Kv channel interacting protein 2                                             | KCHIP2                                                                     |   |
| KCNIP3 | Kv channel interacting protein 3, calsenilin                                 | CSEN, DREAM, KCHIP3                                                        |   |
| KCNJ1  | Potassium inwardly-rectifying channel, subfamily J, member 1                 | KIR1.1, ROMK, ROMK1                                                        |   |
| KCNJ10 | Potassium inwardly-rectifying channel, subfamily J, member 10                | BIRK-10, KCNJ13-PEN, KIR1.2, KIR4.1, SESAME                                |   |
| KCNJ12 | Potassium inwardly-rectifying channel, subfamily J, member 12                | IRK-2, IRK2, KCNJ11, Kir2.2, Kir2.2v, hIRK, hIRK1, Kir2.2, Kir2.2v         |   |
| KCNJ13 | Potassium inwardly-rectifying channel, subfamily J, member 13                | KIR1.4, KIR7.1, LCA16, SVD                                                 |   |
| KCNJ14 | Potassium inwardly-rectifying channel, subfamily J, member 14                | IRK4, KIR2.4                                                               |   |
| KCNJ15 | Potassium inwardly-rectifying channel, subfamily J, member 15                | IRKK, KIR1.3, KIR4.2                                                       |   |
| KCNJ2  | Potassium inwardly-rectifying channel, subfamily J, member 2                 | ATPB9, HIRK1, HIRK1, IRK1, Kir2.1, LQT7, SQT2                              |   |
| KCNJ3  | Potassium inwardly-rectifying channel, subfamily J, member 3                 | GIRK1, KGA, KIR3.1                                                         |   |
| KCNJ5  | Potassium inwardly-rectifying channel, subfamily J, member 5                 | CIR, GIRK4, KATP1, KIR3.4, LQT13                                           | v |
| KCNJ8  | Potassium inwardly-rectifying channel, subfamily J, member 8                 | KIR6.1, uKATP-1                                                            |   |
| KCNK1  | Potassium channel, subfamily K, member 1                                     | K2p5.0/15.1, DFK, HCN0, K2P1, K2p1.1, KCNK1, TWIK-1, TWIK1                 |   |
| KCNK10 | Potassium channel, subfamily K, member 10                                    | K2p10.1, PPP1R97, TREK-2, TREK2                                            |   |
| KCNK13 | Potassium channel, subfamily K, member 13                                    | K2p13.1, THIK-1, THIK1                                                     |   |
| KCNK2  | Potassium channel, subfamily K, member 2                                     | K2p2.1, HIRK1, TREK, TREK-1, TREK1, HIRK-1c, hTREK-1c                      |   |
| KCNK5  | Potassium channel, subfamily K, member 5                                     | K2p5.1, TASK-2, TASK2                                                      |   |
| KCNK6  | Potassium channel, subfamily K, member 6                                     | K2p6.1, KCNK8, TOSS, TWIK-2, TWIK2                                         |   |
| KCNK9  | Potassium channel, subfamily K, member 9                                     | K2p9.1, KT3.2, TASK-3, TASK3                                               |   |
| KCNMA1 | Potassium large conductance calcium-activated channel, subfamily M, member 1 | K11-445A15.1, BKTM, KCa1.1, MaxIK, SARCA, SLO,                             |   |
| KCNMB1 | Potassium large conductance calcium-activated channel, subfamily M, member 1 | BKdelta1, K(vCA)delta, SLO-Delta, hdelta1, hSLO-beta, h(VCA)delta, hdelta1 |   |
| KCNMB2 | Potassium large conductance calcium-activated channel, subfamily M, member 2 | hCG_1646471                                                                |   |
| KCNMB3 | Potassium large conductance calcium-activated channel, subfamily M, member 3 | BKdelta3, hdelta3, K(vCA)delta-3, KCNMB2, KCNMB1, SLO-BETA-2, SLO-BETA-2   |   |



|         |                                                    |                                                               |   |
|---------|----------------------------------------------------|---------------------------------------------------------------|---|
| KCNN1   | Potassium intermediate/small conductance           | KCa2.1, SK1, SKCA1, hSK1                                      |   |
| KCNQ5   | Potassium voltage-gated channel, KQT-like          | RP11-257K9.5, Kv7.5                                           |   |
| KCNS2   | Potassium voltage-gated channel, delayed-rectifier | KV9.2                                                         |   |
| KCTD1   | Potassium channel tetramerization domain           | hCG_38480, C18orf5, SENS                                      |   |
| KCTD10  | Potassium channel tetramerization domain           | MSTP028, BTBD28, ULRO61, hBACURD3                             |   |
| KCTD12  | Potassium channel tetramerization domain           | C13orf2, PFET1, PFETIN                                        |   |
| KCTD14  | Potassium channel tetramerization domain           |                                                               |   |
| KCTD16  | Potassium channel tetramerization domain           |                                                               |   |
| KCTD2   | Potassium channel tetramerization domain           |                                                               |   |
| KCTD20  | Potassium channel tetramerization domain           | RP1-108K11.2, C6orf69, dJ108K11.3                             |   |
| KCTD21  | Potassium channel tetramerization domain           | KCASH2                                                        |   |
| KCTD3   | Potassium channel tetramerization domain           | RP11-5F19.1, NY-REN-45                                        |   |
| KCTD7   | Potassium channel tetramerization domain           | CLN14, EPM3                                                   |   |
| KCTD9   | Potassium channel tetramerization domain           | BTBD27                                                        |   |
| KDELC2  | KDEL (Lys-Asp-Glu-Leu) containing 2                | UNQ1904/PRO4350                                               |   |
| KDELR2  | KDEL (Lys-Asp-Glu-Leu) endoplasmic                 | tcag7.840, ELP-1, ERD2.2                                      |   |
| KDELR3  | KDEL (Lys-Asp-Glu-Leu) endoplasmic                 | RP3-434P1.3, ERD2L3                                           |   |
| KDM1B   | Lysine (K)-specific demethylase 1B                 | RP1-298J13.1, AOT1, COO1193, LSD2, UA204B7.3, H309115.2       |   |
| KDM2A   | Lysine (K)-specific demethylase 2A                 | CXXC8, FBL11, FBL7, FBXL11, JHDM1A, LILINA                    |   |
| KDM2B   | Lysine (K)-specific demethylase 2B                 | CXXC2, FBXL10, Fbl10, JHDM1B, PCCX2                           |   |
| KDM4B   | Lysine (K)-specific demethylase 4B                 | JMJD2B, TDRD14B                                               |   |
| KDM4C   | Lysine (K)-specific demethylase 4C                 | RP11-109L18.1, GAS1, JHDM3C, JMJD2C, TDRD14C, LA146B14.1      |   |
| KDM4D   | Lysine (K)-specific demethylase 4D                 | JMJD2D                                                        |   |
| KDM5A   | Lysine (K)-specific demethylase 5A                 | RBBP-2, RBBP2, RBP2                                           | √ |
| KDM5B   | Lysine (K)-specific demethylase 5B                 | UT51, JARID1B, FEO-1, FEO1, TTF1R98, TOTT, RPPP238A           |   |
| KDM5C   | Lysine (K)-specific demethylase 5C                 | DAST2/ZE, JARID1C, MIKAT3, MIKAT3, MBX6CL, MBX6L, SMCX, VE160 | √ |
| KDM6A   | Lysine (K)-specific demethylase 6A                 | RP13-886N14.3, KABUK2, UTX, bA386N14.2                        | √ |
| KDR     | Kinase insert domain receptor (a type III          | CD309, FLK1, VEGFR, VEGFR2                                    | √ |
| KDSR    | 3-ketodihydrosphingosine reductase                 | DHSR, FVT1, SDR35C1                                           |   |
| KERA    | Keratocan                                          | CNA2, KTN, SLRR2B                                             |   |
| KGFLP1  | Fibroblast growth factor 7 pseudogene              |                                                               |   |
| KHDC1   | KH homology domain containing 1                    | RP11-257K9.4, C6orf148, NDG1, bA257K9.4                       |   |
| KHDRBS1 | KH domain containing, RNA binding, signal          | Sam68, p62, p68                                               |   |

|           |                                                                     |                                                              |  |
|-----------|---------------------------------------------------------------------|--------------------------------------------------------------|--|
| KHDRBS3   | KH domain containing, KNA binding, signal transduction associated 2 | Etle, SALP, SLM-2, SLM2, T-STAR, TSTAR, etoile               |  |
| KHSRP     | KH-type splicing regulatory protein                                 | FBP2, FUBP2, KSRP                                            |  |
| KIAA0040  | KIAA0040                                                            |                                                              |  |
| KIAA0090  |                                                                     |                                                              |  |
| KIAA0101  | KIAA0101                                                            | L5, NS5ATP9, OEATC, OEATC-1, OEATC1, PAF, PAF15, p15(PAF), p |  |
| KIAA0114  |                                                                     |                                                              |  |
| KIAA0125  | KIAA0125                                                            | HSPC053, C14orf110, FAM30A                                   |  |
| KIAA0141  | KIAA0141                                                            | DELE                                                         |  |
| KIAA0146  |                                                                     |                                                              |  |
| KIAA0182  |                                                                     |                                                              |  |
| KIAA0195  | <b>KIAA0195</b>                                                     | TMEM94                                                       |  |
| KIAA0196  | <b>KIAA0196</b>                                                     | RTSC, SPG8                                                   |  |
| KIAA0226  | KIAA0226                                                            | hCG_22771, RUBICON, SCAR15                                   |  |
| KIAA0232  | KIAA0232                                                            |                                                              |  |
| KIAA0240  |                                                                     |                                                              |  |
| KIAA0247  | KIAA0247                                                            |                                                              |  |
| KIAA0284  | KIAA0284 protein                                                    |                                                              |  |
| KIAA0319L | KIAA0319-like                                                       | PP791                                                        |  |
| KIAA0408  | KIAA0408                                                            | RP3-403A15.2                                                 |  |
| KIAA0427  |                                                                     |                                                              |  |
| KIAA0430  | KIAA0430                                                            | LKAP, MARF1, PPP1R34                                         |  |
| KIAA0467  |                                                                     |                                                              |  |
| KIAA0494  |                                                                     |                                                              |  |
| KIAA0513  | KIAA0513                                                            |                                                              |  |
| KIAA0528  |                                                                     |                                                              |  |
| KIAA0556  | KIAA0556                                                            |                                                              |  |
| KIAA0664  |                                                                     |                                                              |  |
| KIAA0753  | KIAA0753                                                            |                                                              |  |
| KIAA0754  | KIAA0754                                                            |                                                              |  |
| KIAA0802  |                                                                     |                                                              |  |
| KIAA0892  |                                                                     |                                                              |  |
| KIAA0895  | KIAA0895                                                            |                                                              |  |
| KIAA0907  | KIAA0907                                                            | RP11-336K24.1, BLOM7                                         |  |

|          |                 |                                                                |   |
|----------|-----------------|----------------------------------------------------------------|---|
| KIAA0913 |                 |                                                                |   |
| KIAA0922 | <b>KIAA0922</b> | TMEM131L                                                       |   |
| KIAA1012 |                 |                                                                |   |
| KIAA1024 | KIAA1024        |                                                                |   |
| KIAA1033 | KIAA1033        | MRT43, SWIP                                                    |   |
| KIAA1045 | KIAA1045        | RP11-392A14.4                                                  |   |
| KIAA1107 | KIAA1107        |                                                                |   |
| KIAA1109 | KIAA1109        | FSA, Tweek                                                     |   |
| KIAA1147 | KIAA1147        | RP5-894A10.2, LCHN, PRO2561                                    |   |
| KIAA1191 | KIAA1191        | p60MONOX                                                       |   |
| KIAA1199 |                 |                                                                |   |
| KIAA1210 | KIAA1210        | RP13-347D8.3                                                   |   |
| KIAA1211 | KIAA1211        |                                                                |   |
| KIAA1217 | KIAA1217        | RP11-324E23.1, SKT                                             |   |
| KIAA1239 |                 |                                                                |   |
| KIAA1244 | KIAA1244        | RP1-171N11.1, A7322, ARFGEF3, BIG3, C6orf92, PPP1R33, dJ171N11 |   |
| KIAA1310 |                 |                                                                |   |
| KIAA1324 | KIAA1324        | RP11-352P4.1, EIG121                                           |   |
| KIAA1328 | KIAA1328        |                                                                |   |
| KIAA1377 | KIAA1377        |                                                                |   |
| KIAA1383 |                 |                                                                |   |
| KIAA1407 | KIAA1407        |                                                                |   |
| KIAA1430 |                 |                                                                |   |
| KIAA1467 | KIAA1467        |                                                                |   |
| KIAA1486 |                 |                                                                |   |
| KIAA1522 | KIAA1522        |                                                                |   |
| KIAA1529 |                 |                                                                |   |
| KIAA1530 |                 |                                                                |   |
| KIAA1549 | KIAA1549        |                                                                | √ |
| KIAA1598 | KIAA1598        |                                                                |   |
| KIAA1609 |                 |                                                                |   |
| KIAA1632 |                 |                                                                |   |
| KIAA1644 | KIAA1644        | LL22NC03-75B3.6                                                |   |

|          |                                                                 |                                                        |  |
|----------|-----------------------------------------------------------------|--------------------------------------------------------|--|
| KIAA1671 | KIAA1671                                                        | CTA-221G9.4                                            |  |
| KIAA1704 |                                                                 |                                                        |  |
| KIAA1712 |                                                                 |                                                        |  |
| KIAA1715 | KIAA1715                                                        | LNP, LNP1, Ul, ulnaless                                |  |
| KIAA1737 |                                                                 |                                                        |  |
| KIAA1751 |                                                                 |                                                        |  |
| KIAA1804 | Mixed lineage kinase 4                                          | RP5-862P8.2MLK4, dJ862P8.3                             |  |
| KIAA1826 | Myo/SANT-like DNA-binding domain containing 4 with coiled coils | DC25, KIAA1826                                         |  |
| KIAA1841 | KIAA1841                                                        |                                                        |  |
| KIAA1908 | PSMG3 antisense RNA 1 (head to head)                            |                                                        |  |
| KIAA1919 |                                                                 |                                                        |  |
| KIAA1967 |                                                                 |                                                        |  |
| KIAA2018 | KIAA2018                                                        | hCG_1642841                                            |  |
| KIAA2022 | KIAA2022                                                        | RP11-130N24.1, MRX98, XPN                              |  |
| KIF13B   | Kinesin family member 13B                                       | GAKIN                                                  |  |
| KIF16B   | Kinesin family member 16B                                       | RP5-971B4.1, C20orf23, KISC20ORF, SNX23                |  |
| KIF18A   | Kinesin family member 18A                                       | OK/SW-cl.108, MS-KIF18A, PPP1R99                       |  |
| KIF18B   |                                                                 |                                                        |  |
| KIF1A    | Kinesin family member 1A                                        | ATSV, C2orf20, HSN2C, MRD9, SPG30, UNC104              |  |
| KIF1B    | Kinesin family member 18B                                       |                                                        |  |
| KIF20B   | Kinesin family member 20B                                       | CT90, KRMP1, MPHOSPH1, MPP-1, MPP1                     |  |
| KIF21A   | Kinesin family member 21A                                       | CFEOM1, FEOM1, FEOM3A                                  |  |
| KIF21B   |                                                                 |                                                        |  |
| KIF22    | Kinesin family member 22                                        | A-528A3.2, KID, KINSL4, ODF, ODF-1, ODF-2, SEMDHL2     |  |
| KIF26B   | Kinesin family member 26B                                       | hCG_21329                                              |  |
| KIF2C    | Kinesin family member 2C                                        | RP11-269F19.1, CT139, KNSL6, MCAK                      |  |
| KIF3A    | Kinesin family member 3A                                        | FLA10, KLP-20                                          |  |
| KIF3B    | Kinesin family member 3B                                        | FLA8, HH0048, KLP-11                                   |  |
| KIF5A    | Kinesin family member 5A                                        | D12S1889, MY050, NKHC, SPG10                           |  |
| KIF5C    | Kinesin family member 5C                                        | CDCBM2, KINN, NKHC, NKHC-2, NKHC2                      |  |
| KIF6     | Kinesin family member 6                                         | KIF1-15/11.4, C00H1102, G1045E3.1, G15711.4, J1189D2.1 |  |
| KILLIN   | Kinn, p53-regulated DNA replication inhibitor                   | CWS4, KILLIN                                           |  |
| KIN      | Kin17 DNA and RNA binding protein                               | BTC17, Rts2, KIN                                       |  |

|         |                                           |                                                   |  |
|---------|-------------------------------------------|---------------------------------------------------|--|
| KIR2DL1 | Kir2 cell immunoglobulin-like receptor,   | AA04c-DCX195L8.1, CD156A, KIR-K04, KIR2Z1,        |  |
| KIR2DL2 | Kir2 cell immunoglobulin-like receptor,   | CU407-000.2, CD156B1, CD156b, NKAT-0, NKAT10,     |  |
| KIR2DL3 | Kir2 cell immunoglobulin-like receptor,   | C50404054.1, CD156B2, CD156b, GL183, KIR-0250D,   |  |
| KIR2DS4 | Kir2 cell immunoglobulin-like receptor,   | KIR-K7b, U250H20.5, CD156i, KIRCD3, NKZDS1,       |  |
| KIR3DS1 | three domains, short extracellular tail 1 | KIR412, KKA2, NKAT-9, NKAT9                       |  |
| KITLG   | KIT ligand                                | CD158E2, KIR-123FM, KIR-G1, NKAT10                |  |
| KITLG   | KIT ligand                                | FPH2, KL-1, Kitl, MGF, SCF, SF, SHEP7             |  |
| KL      | Klotho                                    |                                                   |  |
| KLC1    | Kinesin light chain 1                     | RP11-73M18.7, KLC, KNS2, KNS2A                    |  |
| KLC4    | Kinesin light chain 4                     | KNSL8, bA387M24.3                                 |  |
| KLF11   | Kruppel-like factor 11                    | FKLF, FKLF1, MODY7, TIEG2, Tieg3                  |  |
| KLF12   | Kruppel-like factor 12                    | HSPC122, AP-2rep, AP2REP                          |  |
| KLF13   | Kruppel-like factor 13                    | BTEB3, FKLF2, NSLP1, RFLAT-1, RFLAT1              |  |
| KLF15   | Kruppel-like factor 15                    | KKLF                                              |  |
| KLF17   | Kruppel-like factor 17                    | RP4-675G8.1, ZNF393, Zfp393                       |  |
| KLF3    | Kruppel-like factor 3                     | BKLF                                              |  |
| KLF6    | Kruppel-like factor 6                     | KP11-184AZ.1, BCD1, CDAT, COPEB, CDB1, CDB1,      |  |
| KLF6    | Kruppel-like factor 6                     | DAG1, ST12, ZF9                                   |  |
| KLF8    | Kruppel-like factor 8                     | RP13-1021K9.1, BKLF3, ZNF741                      |  |
| KLF9    | Kruppel-like factor 9                     | BTEB, BTEB1                                       |  |
| KLHDC10 | Kelch domain containing 10                | slim                                              |  |
| KLHDC3  | Kelch domain containing 3                 | RP1-20C7.3, PEAS, dJ20C7.3                        |  |
| KLHDC5  | Kelch-like family member 42               | Ctb9, KLHDC5                                      |  |
| KLHDC7A | Kelch domain containing 7A                | RP11-422P22.2                                     |  |
| KLHDC8A | Kelch domain containing 8A                |                                                   |  |
| KLHDC8B | Kelch domain containing 8B                | FP17659                                           |  |
| KLHL12  | Kelch-like family member 12               | C3IP1, DKIR, hDKIR                                |  |
| KLHL13  | Kelch-like family member 13               | BKLHD2                                            |  |
| KLHL14  | Kelch-like family member 14               |                                                   |  |
| KLHL15  | Kelch-like family member 15               | HEL-S-305                                         |  |
| KLHL2   | Kelch-like family member 2                | ABP-KELCH, MAV, MAYVEN                            |  |
| KLHL24  | Kelch-like family member 24               | DRE1, KRIP6                                       |  |
| KLHL28  | Kelch-like family member 28               | BTBD5                                             |  |
| KLHL3   | Kelch-like family member 3                | PHA2D                                             |  |
| KLHL30  | Kelch-like family member 30               | Chromosome 2, NC_000002.12 (238138722..238152906) |  |

|           |                                                                 |                                                                                       |   |
|-----------|-----------------------------------------------------------------|---------------------------------------------------------------------------------------|---|
| KLHL31    | Kelch-like family member 31                                     | BKLHD6, KBTBD1, KLHL, bA345L23.2                                                      |   |
| KLHL32    | Kelch-like family member 32                                     | KLHL32, BKLHD3, KIAA1900, UG00501103, J121E7.1                                        |   |
| KLHL35    | Kelch-like family member 35                                     |                                                                                       |   |
| KLHL4     | Kelch-like family member 4                                      | DKELCHL, KHL4                                                                         |   |
| KLHL5     | Kelch-like family member 5                                      |                                                                                       |   |
| KLHL6     | Kelch-like family member 6                                      |                                                                                       |   |
| KLHL7     | Kelch-like family member 7                                      | KLHL6, SBBI26                                                                         |   |
| KLK13     | Kallikrein-related peptidase 13                                 | KLK-L4, KLKL4                                                                         |   |
| KLK2      | Kallikrein-related peptidase 2                                  | KLK2A2, hGK-1, hK2                                                                    | v |
| KLK5      | Kallikrein-related peptidase 5                                  | UNQ570/PRO1132, KLK-L2, KLKL2, SCTE                                                   |   |
| KLK7      | Kallikrein-related peptidase 7                                  | PRSS6, SCCE, hK7                                                                      |   |
| KLRF1     | Killer cell lectin-like receptor subfamily 1, member 1          | CLEC5C, NKp80                                                                         |   |
| KMO       | Kynurenine 3-monooxygenase (kynurenine 3-monooxygenase)         | RP1-317G22.1, dJ317G22.1                                                              |   |
| KPNA1     | Karyopherin alpha 1 (importin alpha 5)                          | IPOA5, NPI-1, RCH2, SRP1                                                              |   |
| KPNA3     | Karyopherin alpha 3 (importin alpha 4)                          | KPNA3, IPOA4, SRP1, SRP1gamma, SRP4, LSPD1                                            |   |
| KPNA4     | Karyopherin alpha 4 (importin alpha 3)                          | IPOA3, QIP1, SRP3                                                                     |   |
| KPNA6     | Karyopherin alpha 6 (importin alpha 7)                          | RP4-622L5.1, IPOA7, KPNA7                                                             |   |
| KPNB1     | Karyopherin (importin) beta 1                                   | IMB1, IPO1, IPOB, Impnb, NTF97                                                        |   |
| KPRP      | Keratinocyte proline-rich protein                               | C1orf45                                                                               |   |
| KRAS      | Kirsten rat sarcoma viral oncogene homolog                      | K-RAS, C1C2, K-RAS2A, K-RAS2B, K-RAS4A, K-RAS4B, K-RAS4C, K-RAS4D, NS-NS2, RAS2, RAS4 | v |
| KREMEN1   | Kringle containing transmembrane protein 1                      | CTA-57G9.2, KREMEN, KRM1                                                              |   |
| KRIT1     | KRIT1, ankyrin repeat containing                                | CAM, CCM1                                                                             |   |
| KRR1      | KRR1, small subunit (55S) processome component, homolog (yeast) | HRB2, RIP-1                                                                           |   |
| KRT12     | Keratin 12                                                      | K12                                                                                   |   |
| KRT2      | Keratin 2                                                       | CK-2e, K2eA, KRT2E, KRTE, KRT2                                                        |   |
| KRT37     | Keratin 37                                                      | HA7, K37, KRTHA7                                                                      |   |
| KRT5      | Keratin 5                                                       | CK5, DDD, DDD1, EBS2, K5A, KRT5                                                       |   |
| KRT6B     | Keratin 6B                                                      | CK-6B, CK6B, K6B, KRTL1, PC2, PC4                                                     |   |
| KRT75     | Keratin 75                                                      | K6HF, KB18, PFB                                                                       |   |
| KRT77     | Keratin 77                                                      | K1B, KRT1B                                                                            |   |
| KRT82     | Keratin 82                                                      | HB2, Hb-2, KRTHB2                                                                     |   |
| KRT86     | Keratin 86                                                      | HB6, Hb1, KRTHB1, KRTHB6, MNX, hHb6                                                   |   |
| KRTAP11-1 | Keratin associated protein 11-1                                 | HACL-1, HACL1, KAP11.1                                                                |   |

|           |                                                     |                                                                           |   |
|-----------|-----------------------------------------------------|---------------------------------------------------------------------------|---|
| KRTAP12-2 | Keratin associated protein 12-2                     | KAP12.2, KRTAP12.2                                                        |   |
| KRTAP13-2 | Keratin associated protein 13-2                     | KAP13-2                                                                   |   |
| KRTAP2-4  | Keratin associated protein 2-4                      | hCG_1645697, KAP2.1B, KAP2.4, KRTAP2.4                                    |   |
| KRTAP26-1 | Keratin associated protein 26-1                     |                                                                           |   |
| KRTAP4-5  | Keratin associated protein 4-5                      | KAP4.5, KRTAP4.5                                                          |   |
| KRTAP5-11 | Keratin associated protein 5-11                     | KRTAP5-5, KRTAP5-6, KRTAP5.11                                             |   |
| KRTAP5-2  | Keratin associated protein 5-2                      | KRTAP5-8, KRTAP5.2                                                        |   |
| KRTCAP2   | Keratinocyte associated protein 2                   | KCP2                                                                      |   |
| KSR1      | Kinase suppressor of ras 1                          | KSR, RSU2                                                                 |   |
| KSR2      | Kinase suppressor of ras 2                          |                                                                           |   |
| KTELC1    | Protein O-glucosyltransferase 1                     | MDS010, C30H9, CLF40, KDELC1, KTELC1, MDSRB, Pami, KCLD46                 |   |
| KY        | Kyphoscoliosis peptidase                            |                                                                           |   |
| L1CAM     | L1 cell adhesion molecule                           | CAMLE1, CDT11, HSAS, HSAS1, MASA, MIC3, N-CAM11, NCAM1, NCAM11, S10, SPG1 |   |
| L2HGDH    | L-2-hydroxyglutarate dehydrogenase                  | C14orf160                                                                 |   |
| L3MBTL    | L(3)mbt-like 1 (Drosophila)                         | RP11-138B7.1, H-L(3)MBT1, L3MBTL, ZC2H13, JH38B7.2                        |   |
| L3MBTL3   | L(3)mbt-like 3 (Drosophila)                         | RP11-7306.1, MBT-1, MBT1                                                  |   |
| L3MBTL4   | L(3)mbt-like 4 (Drosophila)                         | HsT1031                                                                   |   |
| LACE1     | Lactation elevated                                  | RP3-479O19.1, AFG1                                                        |   |
| LACTB     | Lactamase, beta                                     | UNQ843/PRO1781, G24, MRPL56                                               |   |
| LAD1      | Ladinin 1                                           | LadA                                                                      |   |
| LAMA3     | Laminin, alpha 3                                    | BM600, E170, LAMNA, LOCS, lama3a                                          |   |
| LAMC1     | Laminin, gamma 1                                    | RP11-181K3.1, LAMB2                                                       |   |
| LAMC2     | Laminin, gamma 2                                    | B2T, BM600, CSF, EBR2, EBR2A, LAMB2T, LAMNB2                              |   |
| LAMP2     | Lysosomal-associated membrane protein 2             | CD107b, LAMP-2, LAMPB, LGP110                                             |   |
| LANCL2    | Vancomycin antibiotic synthetase component C-like 2 | tcag7.697, GPR69B, TASP                                                   |   |
| LANCL3    | Vancomycin antibiotic synthetase component C-like 3 |                                                                           |   |
| LAPTM4B   | Lysosomal protein transmembrane 4 beta              | PSEC0001, LAPTM4beta, LC27                                                |   |
| LAPTM5    | Lysosomal protein transmembrane 5                   | RP5-1166H10.3, CLAST6                                                     |   |
| LARP1B    | Laribonucleoprotein domain family, member 1B        | LARP2                                                                     |   |
| LARP4     | Laribonucleoprotein domain family, member 4B        | PP13296                                                                   |   |
| LARP4B    | Laribonucleoprotein domain family, member 4B        | P11-164C1.3, KIAA0217, LARP5                                              |   |
| LAS1L     | LAS1-like (S. cerevisiae)                           | RP3-475B7.2, Las1-like, dJ475B7.2                                         |   |
| LASP1     | LIM and SH3 protein 1                               | Lasp-1, MLN50                                                             | v |

|          |                                                             |                                                                         |   |
|----------|-------------------------------------------------------------|-------------------------------------------------------------------------|---|
| LASS3    |                                                             |                                                                         |   |
| LASS6    |                                                             |                                                                         |   |
| LAT2     | Linker for activation of T cells family, member 2           | HSPC046, LAB, NTAL, WBSCR15, WBSCR5, WSCR5                              |   |
| LATS2    | Large tumor suppressor kinase 2                             | KPM                                                                     |   |
| LAX1     | Lymphocyte transmembrane adaptor 1                          | LAX                                                                     |   |
| LBR      | Lamin B receptor                                            | PRO0650, DHCR14B, LMN2R, PHA, TDRD18                                    |   |
| LCE2B    | Late cornified envelope 2B                                  | LEP10, SPRL1B, XP5                                                      |   |
| LCLAT1   | Lysocardiolipin acyltransferase 1                           | UNQ1849/PRO9575, TAGFAT8, ACPAT8, ALCAT1, HSPC1840, LYCAT, UNQ1840      |   |
| LCMT1    | Leucine carboxyl methyltransferase 1                        | CGI-68, LCMT, PPMT1                                                     |   |
| LCOR     | Ligand dependent nuclear receptor                           | MLR2                                                                    |   |
| LCORL    | Ligand dependent nuclear receptor                           | MLR1                                                                    |   |
| LCP1     | Lymphocyte cytosolic protein 1 (L-plastin)                  | NP11-159114.1, CP04, HLL-5-57, L-PLASTIN, LC041, LPL, PLS2              | v |
| LCTL     | Lactase-like                                                | UNQ3022/PRO9820, KLG, KLPH                                              |   |
| LDB1     | LIM domain binding 1                                        | CLIM2, NLI                                                              |   |
| LDB3     | LIM domain binding 3                                        | CMDFC, CMFDS, CPTIERZ1, LDB3Z4, LVNCS, MEM4, ORACLE, PDLIM6, ZASB, LDB2 |   |
| LDHAL6A  | Lactate dehydrogenase A-like 6A                             | LDH6A                                                                   |   |
| LDHC     | Lactate dehydrogenase C                                     | CT32, LDH3, LDHX                                                        |   |
| LDLR     | Low density lipoprotein receptor                            | FH, FHC, LDLCQ2                                                         |   |
| LDLRAP1  | Low density lipoprotein receptor adaptor protein 1          | RP11-70P17.2, ARH, ARH1, ARH2, FHCB1, FHCB2                             |   |
| LEAP2    | Liver expressed antimicrobial peptide 2                     | LEAP-2                                                                  |   |
| LEFTY2   | Left-right determination factor 2                           | PSEC0024, EBAF, LEFTA, LEFTYA, TGFB4                                    |   |
| LEKR1    | Leucine, glutamate and lysine rich 1                        |                                                                         |   |
| LEMD3    | LEM domain containing 3                                     | MAN1                                                                    |   |
| LEP      | Leptin                                                      | LEPD, OB, OBS                                                           |   |
| LEPR     | Leptin receptor                                             | CD295, LEP-RD, OB-R, OBR, LEPR                                          |   |
| LEPRE1   | Leucine prone-enriched proteoglycan (leprecan)-1            | P3H1                                                                    |   |
| LEPREL1  | Leprecan-like 1                                             | MCVD, MLAT4, P3H2                                                       |   |
| LEPROTL1 | Leptin receptor overlapping transcript-like 1               | My047, HSPC112, Vps55, my047                                            |   |
| LGALS12  | Lectin, galactoside-binding, soluble, 12                    | GAL12, GRIP1                                                            |   |
| LGI1     | Leucine-rich, glioma inactivated 1                          | UNQ775/PRO1509, ADLTE, ADFAE1, ADFAE1, EPITEMBIN, EPT, ETL1, IR1000     |   |
| LGI2     | Leucine-rich repeat LGI family, member 2                    | LGIL2                                                                   |   |
| LGR5     | Leucine-rich repeat containing G protein-coupled receptor 5 | FEX, GPR49, GPR67, GRP49, HG38                                          |   |
| LHCGR    | Luteinizing hormone/chorionic gonadotropin receptor         | HHG, LCGR, LGRZ, LHCG-R, LHCGR, LHR, LHHR, LSHR, LHCF                   |   |



|                 |                                                                                |                                                                 |   |
|-----------------|--------------------------------------------------------------------------------|-----------------------------------------------------------------|---|
| LHFPL3          | Lipoma HMGIC fusion partner-like 3                                             | LHFPL4                                                          |   |
| LHX3            | LIM homeobox 3                                                                 | CPHD3, LIM3, M2-LHX3                                            |   |
| LHX6            | LIM homeobox 6                                                                 | RP23-169L4.3.1, Lhx6                                            |   |
| LHX8            | LIM homeobox 8                                                                 | LHX7                                                            |   |
| LHX9            | LIM homeobox 9                                                                 | RP11-255O17.2                                                   |   |
| LIF             | Leukemia inhibitory factor                                                     | CDF, DIA, HILDA, MLPLI                                          |   |
| LIFR            | Leukemia inhibitory factor receptor alpha                                      | CD118, LIF-R, SJS2, STWS, SWS                                   | v |
| LIG4            | Ligase IV, DNA, ATP-dependent                                                  | LIG4S                                                           |   |
| LILRA1          | Leukocyte immunoglobulin-like receptor, subfamily A (with TM and ITIM domains) | XXbac-BCX85G21.3, CD85I, LIR-6, LIR6                            |   |
| LILRB1          | Leukocyte immunoglobulin-like receptor, subfamily B (with TM and ITIM domains) | XXbac-BCX85G21.4, CD85J, IL1-2, IL12, LIR-1, LIR1, MIP-7, MIP7  |   |
| LILRB2          | Leukocyte immunoglobulin-like receptor, subfamily B (with TM and ITIM domains) | XXbac-BCX105G0.12-005, CD85D, IL1-4, IL14, LIR-2, LIR2          |   |
| LILRB3          | Leukocyte immunoglobulin-like receptor, subfamily B (with TM and ITIM domains) | XXbac-BCX105G0.10, CD85A, IL1-3, IL13, LILRA6, LIR-3, LIR3, IRP |   |
| LILRP2          |                                                                                |                                                                 |   |
| LIMCH1          | LIM and calponin homology domains 1                                            | LIMCH1A, LMO7B                                                  |   |
| LIMD1           | LIM domains containing 1                                                       | LIMK, LIMK-1                                                    |   |
| LIMK1           | LIM domain kinase 1                                                            |                                                                 |   |
| LIMK2           | LIM domain kinase 2                                                            |                                                                 |   |
| LIMS1           | LIM and senescent cell antigen-like domains 1                                  | PINCH, PINCH-1, PINCH1                                          |   |
| LIMS3           | LIM and senescent cell antigen-like domains 3                                  | PINCH-3                                                         |   |
| LIMS3-LOC440895 | LIM and senescent cell antigen-like domains 3                                  | PINCH-3                                                         |   |
| LIN28A          | Lin-28 homolog A ( <i>C. elegans</i> )                                         | CSDD1, LIN-28, LIN28, ZCCHC1, lin-28A                           |   |
| LIN28B          | Lin-28 homolog B ( <i>C. elegans</i> )                                         | RP3-522O2.2, CSDD2                                              |   |
| LIN52           |                                                                                |                                                                 |   |
| LIN54           | LIN-54 DREAM MuvB core complex                                                 | CXCDC1, JC8.6, MIP120                                           |   |
| LIN7C           | 5-hydroxytryptamine (serotonin) receptor 2C, G-protein-coupled                 | RP11-810O3.1, 5-HT2C, 5-HTR2C, 5HTR2C, HTR1C                    |   |
| LIPF            | Lipase, gastric                                                                | RP11-186O14.1, GL, HGL, HLAL                                    |   |
| LIPG            | Lipase, endothelial                                                            | UNQ387/PRO719, EDL, EL, PRO719                                  |   |
| LIX1            |                                                                                |                                                                 |   |
| LLPH            |                                                                                |                                                                 |   |
| LMAN1           | Lectin, mannose-binding, 1                                                     | ERGIC-53, ERGIC53, F5F8D, FMFD1, MCFD1, MR60, gp58              |   |
| LMBR1           | Limb development membrane protein 1                                            | tcag7.573, ACHP, C7orf2, DIF14, PPD2, TPT, ZRS                  |   |
| LMBR1L          | Limb development membrane protein 1-like                                       | UNQ458/PRO783, LMR                                              |   |
| LMBRD1          | LMBR1 domain containing 1                                                      | BM-021, C6orf209, LMBD1, MAHCF, NESI                            |   |

|              |                                                |                                                                                         |   |
|--------------|------------------------------------------------|-----------------------------------------------------------------------------------------|---|
| LMBRD2       | LMBR1 domain containing 2                      |                                                                                         |   |
| LMCD1        | LIM and cysteine-rich domains 1                |                                                                                         |   |
| LMNA         | Lamin A/C                                      | RP11-341H9.1, CDCD1, CDDC, CMD1A, CMT2B1, FMD2, EPL, EPLD, EPLD2, IGFBP, IDC, LDB1, LEP |   |
| LMO1         | LIM domain only 1 (rhombotin 1)                | RBTN1, RHOM1, TTG1                                                                      | v |
| LMO3         | LIM domain only 3 (rhombotin-like 2)           | RBTN3, RBTN2, RHOM3, Rhom-3                                                             |   |
| LMO4         | LIM domain only 4                              |                                                                                         |   |
| LMO7         | LIM domain 7                                   | RP11-332E3.2, FBX20, FBXO20, LOMP                                                       |   |
| LMOD1        | Leiomodin 1 (smooth muscle)                    | 1D, 64kD, D1, SM-LMOD                                                                   |   |
| LMOD3        | leiomodin 3 (fetal)                            |                                                                                         |   |
| LMTK2        |                                                |                                                                                         |   |
| LMX1A        | LIM homeobox transcription factor 1, alpha     | LMX1, LMX1.1                                                                            |   |
| LMX1B        | LIM homeobox transcription factor 1, beta      | RP11-489N22.3, LMX1.2, NPS1                                                             |   |
| LNPEP        | Leucyl/cystinyl aminopeptidase                 | CAP, IRAP, P-LAP, PLAP                                                                  |   |
| LNX2         | Ligand of numb-protein X 2                     | PDZRN1                                                                                  |   |
| LOC100049716 | Uncharacterized LOC100049716                   |                                                                                         |   |
| LOC100093631 | General transcription factor II, i, pseudogene |                                                                                         |   |
| LOC100124692 |                                                |                                                                                         |   |
| LOC100125556 |                                                |                                                                                         |   |
| LOC100125918 | Uncharacterized LOC100125918                   |                                                                                         |   |
| LOC100128025 |                                                |                                                                                         |   |
| LOC100128098 |                                                |                                                                                         |   |
| LOC100128239 | Uncharacterized LOC100128239                   |                                                                                         |   |
| LOC100128264 |                                                |                                                                                         |   |
| LOC100128292 |                                                |                                                                                         |   |
| LOC100128338 |                                                |                                                                                         |   |
| LOC100128554 | Uncharacterized LOC100128554                   | RP5-944M2.3                                                                             |   |
| LOC100128560 |                                                |                                                                                         |   |
| LOC100128811 |                                                |                                                                                         |   |
| LOC100129034 | Uncharacterized LOC100129034                   |                                                                                         |   |
| LOC100129055 | Cyclin Y-like 1 pseudogene                     |                                                                                         |   |
| LOC100129066 |                                                |                                                                                         |   |
| LOC100129195 |                                                |                                                                                         |   |
| LOC100129250 |                                                |                                                                                         |   |

|              |                                     |             |  |
|--------------|-------------------------------------|-------------|--|
| LOC100129387 |                                     |             |  |
| LOC100129503 |                                     |             |  |
| LOC100129550 | Uncharacterized LOC100129550        |             |  |
| LOC100129620 | Uncharacterized LOC100129620        |             |  |
| LOC100129662 |                                     |             |  |
| LOC100129716 |                                     |             |  |
| LOC100129794 |                                     |             |  |
| LOC100129826 | Uncharacterized LOC100129826        |             |  |
| LOC100129940 | Uncharacterized LOC100129940        |             |  |
| LOC100129995 |                                     |             |  |
| LOC100130000 |                                     |             |  |
| LOC100130148 |                                     |             |  |
| LOC100130283 | Uncharacterized LOC100130283        |             |  |
| LOC100130386 |                                     |             |  |
| LOC100130522 |                                     |             |  |
| LOC100130894 |                                     |             |  |
| LOC100130954 |                                     |             |  |
| LOC100131132 | Uncharacterized LOC100131132        |             |  |
| LOC100131190 | Uncharacterized LOC100131190        |             |  |
| LOC100131347 | RAD52 motif containing 1 pseudogene |             |  |
| LOC100131496 | Uncharacterized LOC100131496        |             |  |
| LOC100132111 | Uncharacterized LOC100132111        |             |  |
| LOC100132352 | FSHD region gene 1 pseudogene       |             |  |
| LOC100132354 |                                     |             |  |
| LOC100132618 |                                     |             |  |
| LOC100132707 |                                     |             |  |
| LOC100132724 |                                     |             |  |
| LOC100132735 | Uncharacterized LOC100132735        |             |  |
| LOC100132832 |                                     |             |  |
| LOC100133029 | Sirtuin 5 pseudogene                | RP4-609E1.2 |  |
| LOC100133091 | Uncharacterized LOC100133091        |             |  |
| LOC100133469 |                                     |             |  |
| LOC100133612 |                                     |             |  |

|              |                              |  |  |
|--------------|------------------------------|--|--|
| LOC100134229 |                              |  |  |
| LOC100134259 |                              |  |  |
| LOC100134368 | Uncharacterized LOC100134368 |  |  |
| LOC100134445 | Uncharacterized LOC100134445 |  |  |
| LOC100134868 | Uncharacterized LOC100134868 |  |  |
| LOC100189589 |                              |  |  |
| LOC100216479 |                              |  |  |
| LOC100270804 | Uncharacterized LOC100270804 |  |  |
| LOC100271831 | Uncharacterized LOC100271831 |  |  |
| LOC100271832 | Uncharacterized LOC100271832 |  |  |
| LOC100272228 |                              |  |  |
| LOC100286844 |                              |  |  |
| LOC100288644 | Uncharacterized LOC100288644 |  |  |
| LOC100289602 |                              |  |  |
| LOC100302401 |                              |  |  |
| LOC100302652 |                              |  |  |
| LOC121838    |                              |  |  |
| LOC121952    |                              |  |  |
| LOC134466    |                              |  |  |
| LOC144486    |                              |  |  |
| LOC144571    |                              |  |  |
| LOC144920    |                              |  |  |
| LOC147004    | Uncharacterized LOC147004    |  |  |
| LOC147670    |                              |  |  |
| LOC147804    |                              |  |  |
| LOC148145    |                              |  |  |
| LOC148413    | Uncharacterized LOC148413    |  |  |
| LOC149134    |                              |  |  |
| LOC149773    |                              |  |  |
| LOC150622    |                              |  |  |
| LOC151162    | Hypothetical LOC151162       |  |  |
| LOC151300    |                              |  |  |
| LOC151484    | Uncharacterized LOC151484    |  |  |

|           |                           |               |  |
|-----------|---------------------------|---------------|--|
| LOC151534 |                           |               |  |
| LOC152225 | Uncharacterized LOC152225 | RP11-221J22.1 |  |
| LOC152742 |                           |               |  |
| LOC153328 |                           |               |  |
| LOC153684 | Uncharacterized LOC153684 |               |  |
| LOC154092 |                           |               |  |
| LOC154822 |                           |               |  |
| LOC157273 | Uncharacterized LOC157273 |               |  |
| LOC158381 |                           |               |  |
| LOC162632 |                           |               |  |
| LOC221442 |                           |               |  |
| LOC221710 |                           |               |  |
| LOC221946 | Uncharacterized LOC221946 |               |  |
| LOC253044 | Uncharacterized LOC253044 |               |  |
| LOC253724 |                           |               |  |
| LOC254099 |                           |               |  |
| LOC255167 |                           |               |  |
| LOC255187 | Uncharacterized LOC255187 | hCG_1980447   |  |
| LOC256880 | Uncharacterized LOC256880 | RP11-15B17.1  |  |
| LOC257358 |                           |               |  |
| LOC283070 | Uncharacterized LOC283070 |               |  |
| LOC283267 |                           |               |  |
| LOC283392 |                           |               |  |
| LOC283404 |                           |               |  |
| LOC283508 | Uncharacterized LOC283508 |               |  |
| LOC283585 | Uncharacterized LOC283585 |               |  |
| LOC283663 |                           |               |  |
| LOC283731 | Uncharacterized LOC283731 |               |  |
| LOC283887 | Uncharacterized LOC283887 |               |  |
| LOC283914 | Uncharacterized LOC283914 |               |  |
| LOC284294 | Uncharacterized LOC284294 |               |  |
| LOC284408 |                           |               |  |
| LOC284551 |                           |               |  |

|           |                                                    |             |  |
|-----------|----------------------------------------------------|-------------|--|
| LOC284561 | Uncharacterized LOC284561                          |             |  |
| LOC284577 | Uncharacterized LOC284577                          |             |  |
| LOC284581 | Uncharacterized LOC284581                          |             |  |
| LOC284632 | Uncharacterized LOC284632                          |             |  |
| LOC284661 | Uncharacterized LOC284661                          |             |  |
| LOC284749 |                                                    |             |  |
| LOC284861 |                                                    |             |  |
| LOC284900 |                                                    |             |  |
| LOC284926 | Uncharacterized LOC284926                          |             |  |
| LOC285026 |                                                    |             |  |
| LOC285045 |                                                    |             |  |
| LOC285074 | Anaphase promoting complex subunit 1<br>pseudogene |             |  |
| LOC285359 |                                                    |             |  |
| LOC285401 |                                                    |             |  |
| LOC285500 | Uncharacterized LOC285500                          |             |  |
| LOC285501 |                                                    |             |  |
| LOC285505 | Uncharacterized LOC285505                          |             |  |
| LOC285547 |                                                    |             |  |
| LOC285548 |                                                    |             |  |
| LOC285556 | Uncharacterized LOC285556                          |             |  |
| LOC285593 | Uncharacterized LOC285593                          |             |  |
| LOC285735 |                                                    |             |  |
| LOC285778 |                                                    |             |  |
| LOC285812 | Uncharacterized LOC285812                          |             |  |
| LOC285954 |                                                    |             |  |
| LOC285965 |                                                    |             |  |
| LOC286094 | Uncharacterized LOC286094                          |             |  |
| LOC286135 |                                                    |             |  |
| LOC286184 |                                                    |             |  |
| LOC286238 | Uncharacterized LOC286238                          | RP13-60M5.2 |  |
| LOC286299 |                                                    |             |  |
| LOC286367 |                                                    |             |  |
| LOC29034  |                                                    |             |  |

|           |                                                                |  |  |
|-----------|----------------------------------------------------------------|--|--|
| LOC338651 |                                                                |  |  |
| LOC338797 | Uncharacterized LOC338797                                      |  |  |
| LOC338864 |                                                                |  |  |
| LOC339166 | Uncharacterized LOC339166                                      |  |  |
| LOC339240 |                                                                |  |  |
| LOC339290 |                                                                |  |  |
| LOC339400 |                                                                |  |  |
| LOC339524 |                                                                |  |  |
| LOC339539 | Uncharacterized LOC339539                                      |  |  |
| LOC339926 |                                                                |  |  |
| LOC340094 |                                                                |  |  |
| LOC340113 | Uncharacterized LOC340113                                      |  |  |
| LOC340544 |                                                                |  |  |
| LOC344887 | FNIII-A-like family domain containing 1<br>pseudogene          |  |  |
| LOC345643 |                                                                |  |  |
| LOC349114 |                                                                |  |  |
| LOC360030 |                                                                |  |  |
| LOC374443 | C-type lectin domain family 2, member D<br>pseudogene          |  |  |
| LOC387647 |                                                                |  |  |
| LOC387693 |                                                                |  |  |
| LOC388692 | Uncharacterized LOC388692                                      |  |  |
| LOC388889 |                                                                |  |  |
| LOC388906 |                                                                |  |  |
| LOC388955 | PKLEL domain-containing protein 1,<br>mitochondrial pseudogene |  |  |
| LOC389043 |                                                                |  |  |
| LOC389705 | Chromosome 4 open reading frame 27<br>pseudogene               |  |  |
| LOC389791 |                                                                |  |  |
| LOC400238 |                                                                |  |  |
| LOC400553 | Uncharacterized LOC400553                                      |  |  |
| LOC400568 | Uncharacterized LOC400568                                      |  |  |
| LOC400604 |                                                                |  |  |
| LOC400622 | Uncharacterized LOC400622                                      |  |  |
| LOC400707 | Uncharacterized LOC400707                                      |  |  |

|           |                                                                                        |  |  |
|-----------|----------------------------------------------------------------------------------------|--|--|
| LOC400768 | Uncharacterized LOC400768                                                              |  |  |
| LOC400804 |                                                                                        |  |  |
| LOC400940 | Uncharacterized LOC400940                                                              |  |  |
| LOC401093 |                                                                                        |  |  |
| LOC401317 | Uncharacterized LOC401317                                                              |  |  |
| LOC401463 | Uncharacterized LOC401463                                                              |  |  |
| LOC401588 |                                                                                        |  |  |
| LOC440288 |                                                                                        |  |  |
| LOC440419 |                                                                                        |  |  |
| LOC440792 | Formate dehydrogenase (oxidase) 1<br>pseudogene                                        |  |  |
| LOC440993 |                                                                                        |  |  |
| LOC441046 |                                                                                        |  |  |
| LOC441259 | Postmitotic segregation increased 2<br>pseudogene                                      |  |  |
| LOC441493 |                                                                                        |  |  |
| LOC442308 |                                                                                        |  |  |
| LOC442421 |                                                                                        |  |  |
| LOC503519 |                                                                                        |  |  |
| LOC554223 | Histocompatibility antigen-related                                                     |  |  |
| LOC572558 |                                                                                        |  |  |
| LOC613126 |                                                                                        |  |  |
| LOC613266 | Uncharacterized LOC613266                                                              |  |  |
| LOC63930  | Uncharacterized LOC63930                                                               |  |  |
| LOC641298 |                                                                                        |  |  |
| LOC641364 |                                                                                        |  |  |
| LOC641367 | Cyclin Y-like 1 pseudogene                                                             |  |  |
| LOC641515 | Alpha-1,5-mannosyl-glycoprotein 4-beta-N-<br>acetylhexosaminyltransferase-like protein |  |  |
| LOC642597 |                                                                                        |  |  |
| LOC642826 |                                                                                        |  |  |
| LOC642852 | Uncharacterized LOC642852                                                              |  |  |
| LOC643327 | Uncharacterized LOC643327                                                              |  |  |
| LOC643387 | AR DNA binding protein pseudogene                                                      |  |  |
| LOC643406 | Uncharacterized LOC643406                                                              |  |  |
| LOC643648 |                                                                                        |  |  |



|           |                                                                       |  |  |
|-----------|-----------------------------------------------------------------------|--|--|
| LOC643749 |                                                                       |  |  |
| LOC643763 |                                                                       |  |  |
| LOC643837 |                                                                       |  |  |
| LOC643955 |                                                                       |  |  |
| LOC644248 |                                                                       |  |  |
| LOC645166 | Lymphocyte-specific protein 1 pseudogene                              |  |  |
| LOC645195 | Uncharacterized LOC645195                                             |  |  |
| LOC645332 |                                                                       |  |  |
| LOC645513 | Uncharacterized LOC645513                                             |  |  |
| LOC646168 |                                                                       |  |  |
| LOC646241 | Uncharacterized LOC646241                                             |  |  |
| LOC646736 | Uncharacterized LOC646736                                             |  |  |
| LOC646813 | DEAF1 (Asp-Glu-Ala-His) box nuclease 9<br>pseudogene                  |  |  |
| LOC646851 |                                                                       |  |  |
| LOC646999 | Akirin 1 pseudogene                                                   |  |  |
| LOC647121 |                                                                       |  |  |
| LOC647589 |                                                                       |  |  |
| LOC647979 |                                                                       |  |  |
| LOC650368 |                                                                       |  |  |
| LOC650623 |                                                                       |  |  |
| LOC651250 |                                                                       |  |  |
| LOC652276 | Potassium channel tetramerization domain<br>containing 5 pseudogene   |  |  |
| LOC653391 |                                                                       |  |  |
| LOC654433 |                                                                       |  |  |
| LOC654780 |                                                                       |  |  |
| LOC677759 |                                                                       |  |  |
| LOC727726 |                                                                       |  |  |
| LOC727896 | Cysteine and histidine-rich domain<br>(CHORD) containing 1 pseudogene |  |  |
| LOC727924 | Uncharacterized LOC727924                                             |  |  |
| LOC728095 |                                                                       |  |  |
| LOC728142 |                                                                       |  |  |
| LOC728192 |                                                                       |  |  |
| LOC728208 | Uncharacterized LOC728208                                             |  |  |

|           |                                                          |             |  |
|-----------|----------------------------------------------------------|-------------|--|
| LOC728264 |                                                          |             |  |
| LOC728276 |                                                          |             |  |
| LOC728342 |                                                          |             |  |
| LOC728377 |                                                          |             |  |
| LOC728392 | Uncharacterized LOC728392                                |             |  |
| LOC728640 |                                                          |             |  |
| LOC728660 | Uncharacterized LOC728660                                |             |  |
| LOC728723 |                                                          |             |  |
| LOC728819 | HCG1645220                                               | hCG_1645220 |  |
| LOC729013 |                                                          |             |  |
| LOC729082 |                                                          |             |  |
| LOC729218 |                                                          |             |  |
| LOC729444 |                                                          |             |  |
| LOC729678 |                                                          |             |  |
| LOC729739 | Peptidylprolyl isomerase A (cyclophilin A)<br>pseudogene |             |  |
| LOC729799 |                                                          |             |  |
| LOC729862 |                                                          |             |  |
| LOC730101 | Uncharacterized LOC730101                                |             |  |
| LOC730668 | Dynein heavy chain -like pseudogene                      |             |  |
| LOC730811 |                                                          |             |  |
| LOC731789 |                                                          |             |  |
| LOC80054  |                                                          |             |  |
| LOC80154  |                                                          |             |  |
| LOC81691  | Exonuclease NEF-sp                                       | 44M2.3      |  |
| LOC84740  |                                                          |             |  |
| LOC84856  |                                                          |             |  |
| LOC90246  | Uncharacterized LOC90246                                 |             |  |
| LOC90586  |                                                          |             |  |
| LOC93622  | MOH4 family associated protein 1-like 1<br>pseudogene    |             |  |
| LOC96610  |                                                          |             |  |
| LOH12CR1  | Loss of heterozygosity, 12, Chromosomal<br>region 1      |             |  |
| LOH3CR2A  |                                                          |             |  |
| LONRF1    | LOH peptidease N-terminal domain and ring<br>finger 1    | RNF191      |  |

|        |                                               |                                                                            |   |
|--------|-----------------------------------------------|----------------------------------------------------------------------------|---|
| LONRF2 | ECN peptidase N-terminal domain and ring      | RNF192                                                                     |   |
| LONRF3 | ECN peptidase N-terminal domain and ring      | RP13-347D8.4, RNF127                                                       |   |
| LOX    | Lysyl oxidase                                 |                                                                            |   |
| LOXL2  | Lysyl oxidase-like 2                          | LOR2, WS9-14                                                               |   |
| LPAR1  | Lysophosphatidic acid receptor 1              | RP11-104M22.2, EDG2, GPR20, GPCR20, LPAT, Muc12, VZG1, Gpr12, gpr12, gpr12 |   |
| LPCAT1 | Lysophosphatidylcholine acyltransferase 1     | AYTL2, PFAAP3, lpcat                                                       |   |
| LPCAT2 | Lysophosphatidylcholine acyltransferase 2     | AYTL1, LysoPAFAT                                                           |   |
| LPGAT1 | Lysophosphatidylglycerol acyltransferase 1    | FAM34A, FAM34A1, NET8                                                      |   |
| LPHN3  | Latrophilin 3                                 | CIRL3, LEC3                                                                |   |
| LPIN1  | Lipin 1                                       | PAP1                                                                       |   |
| LPL    | Lipoprotein lipase                            | HDLCQ11, LIPD                                                              |   |
| LPP    | Lipid domain containing protein               |                                                                            | v |
| LPPR1  | Lipid phosphate phosphatase-related protein 1 | RP11-35N6.1PRG-3                                                           |   |
| LPPR4  | Lipid phosphate phosphatase-related protein 4 | RP4-788L13.1LPR4, PHP1, PRG-1, PRG1                                        |   |
| LPPR5  | Lipid phosphate phosphatase-related protein 5 | PAP2PAP2D, PRG5                                                            |   |
| LRAT   | lecithin retinol acyltransferase              | LCA14                                                                      |   |
| LRBA   | leucine-rich repeat containing, beach         | BGL, CDC4L, CVID8, LAB300, LBA                                             |   |
| LRCH1  | leucine-rich repeats and carboxin homology    | RP11-147L20.3, CHDC1, NP81                                                 |   |
| LRFN2  | leucine-rich repeat and fibronectin type III  | RP11-535K1.2, FIGLER2, KIAA1246, SALM1                                     |   |
| LRGUK  | leucine-rich repeats and guanylate kinase     |                                                                            |   |
| LRIG1  | leucine-rich repeats and immunoglobulin-      | LIG-1, LIG1                                                                |   |
| LRP1   | low density lipoprotein receptor-related      | AZMK, AFOLK, ATR, CD91, IGFBP5K, LRTA, TCERF5, LRP1                        |   |
| LRP11  | low density lipoprotein receptor-related      | RP11-350J20.11-002, MANSC3, bA350J20.3                                     |   |
| LRP12  | low density lipoprotein receptor-related      | ST7                                                                        |   |
| LRP2   | low density lipoprotein receptor-related      | DBS, GP330                                                                 |   |
| LRP2BP | LRP2 binding protein                          |                                                                            |   |
| LRP4   | low density lipoprotein receptor-related      | CLSS, LRP-4, LRP10, MEGF7, SOST2                                           |   |
| LRP6   | low density lipoprotein receptor-related      | ADCAD2                                                                     |   |
| LRP8   | low density lipoprotein receptor-related      | RP5-1024G6.8, APOER2, HSZ75190, LRP-8, MCI1                                |   |
| LRPPRC | leucine-rich pentapeptide repeat              | CLONE-23970, GP130, LRP130, LSFC                                           |   |
| LRRC1  | Leucine rich repeat containing 1              | RP3-523E19.1, LANO, dJ523E19.1                                             |   |
| LRRC10 | Leucine rich repeat containing 10             | HRLRRPA, LRRC10                                                            |   |
| LRRC14 | Leucine rich repeat containing 14             | LRRC14A                                                                    |   |

|          |                                                          |                                                   |  |
|----------|----------------------------------------------------------|---------------------------------------------------|--|
| LRRC15   | Leucine rich repeat containing 15                        | LIB                                               |  |
| LRRC17   | Leucine rich repeat containing 17                        | UNQ3076/PRO9909, P37NB                            |  |
| LRRC2    | Leucine rich repeat containing 2                         |                                                   |  |
| LRRC27   | Leucine rich repeat containing 27                        | RP11-273H7.2                                      |  |
| LRRC32   | Leucine rich repeat containing 32                        | D11S833E, GARP                                    |  |
| LRRC34   | Leucine rich repeat containing 34                        |                                                   |  |
| LRRC37A2 | Leucine rich repeat containing 37, member A2             | LRRC37                                            |  |
| LRRC37A4 | Leucine rich repeat containing 37, member A4             | LRRC37A4                                          |  |
| LRRC37B2 | Leucine rich repeat containing 37B2                      | LRRC37B2                                          |  |
| LRRC4    | Leucine rich repeat containing 4                         | NAG14, NGL-2                                      |  |
| LRRC43   | Leucine rich repeat containing 43                        |                                                   |  |
| LRRC48   | Leucine rich repeat containing 48                        |                                                   |  |
| LRRC55   | Leucine rich repeat containing 55                        |                                                   |  |
| LRRC57   | Leucine rich repeat containing 57                        |                                                   |  |
| LRRC58   | Leucine rich repeat containing 58                        |                                                   |  |
| LRRC8A   | Leucine rich repeat containing 8 family, member A        | RP11-101E3.3, AGM5, LRRC8                         |  |
| LRRC8C   | Leucine rich repeat containing 8 family, member C        | AD158, FAD158                                     |  |
| LRRC8D   | Leucine rich repeat containing 8 family, member D        | RP11-302M6.1, LRRC5                               |  |
| LRRC9    | Leucine rich repeat containing 9                         |                                                   |  |
| LRCC1    | Leucine rich repeat and coiled-coil domain containing 1  | CLERC, SAP2, VFL1                                 |  |
| LRRFIP1  | Leucine rich repeat (in FHL) interacting protein 1       | FLAP-1, FLAP1, FLIAP1, GCF-2, GCF2, HUF1-1, TRIP1 |  |
| LRRFIP2  | Leucine rich repeat (in FHL) interacting protein 2       | HUF1-2                                            |  |
| LRRK1    | Leucine-rich repeat kinase 1                             | RIPK6, Roco1                                      |  |
| LRRK2    | Leucine-rich repeat kinase 2                             | AURA17, DARDARIN, PARK8, RIPK7, ROCO2             |  |
| LRRN1    | Leucine rich repeat neuronal 1                           | Nbla10449, FIGLER3, NLRR-1                        |  |
| LRRTM4   | Leucine rich repeat transmembrane neuronal 4             | UNQ3075/PRO9907                                   |  |
| LSG1     | Large 60S subunit nuclear export GTPase 1                |                                                   |  |
| LSM14A   | LSM14A, SCD6 homolog A ( <i>S. cerevisiae</i> )          | C19orf13, FAM61A, RAP55, RAP55A                   |  |
| LTBP2    | Latent transforming growth factor beta binding protein 2 | C14orf141, GLC3D, LTBP3, MSPKA, MSTP031, WMS3     |  |
| LTBP4    | Latent transforming growth factor beta binding protein 4 | ARCL1C, LTBP-4L, LTBP4S,LTBP4                     |  |
| LTV1     | LTV1 ribosome biogenesis factor                          | C6orf93, dJ468K18.4                               |  |
| LUC7L2   | LUC7-like 2 ( <i>S. cerevisiae</i> )                     | CGI-59, CGI-74, LUC7B2                            |  |
| LUC7L3   | LUC7-like 3 ( <i>S. cerevisiae</i> )                     | CRA, CREAP-1, CROP, LUC7A, OA48-18, hLuc7A        |  |

|         |                                                                       |                                                       |   |
|---------|-----------------------------------------------------------------------|-------------------------------------------------------|---|
| LUZP1   | Leucine zipper protein 1                                              | RP1-184J9.3, LUZP                                     |   |
| LUZP2   | Leucine zipper protein 2                                              | UNQ2566/PRO6246, KFSP2566, PRO6246                    |   |
| LY75    | Lymphocyte antigen 75                                                 | CD205, CLEC13B, DEC-205, GP200-MR6, LY-75             |   |
| LY86    | Lymphocyte antigen 86                                                 | RP1-80N2.1, MD-1, MMD-1, dJ80N2.1                     |   |
| LYG2    | Lysozyme G-like 2                                                     | LYGH                                                  |   |
| LYPD5   | LY6/PLAUR domain containing 5                                         | UNQ1908/PRO4356, PRO4356                              |   |
| LYPD6   | LY6/PLAUR domain containing 6                                         | UNQ3023/PRO9821                                       |   |
| LYPLA2  | Lysophospholipase II                                                  | RP5-886K2.5, APT-2, DJ886K2.4                         |   |
| LYRM1   | LYR motif containing 1                                                | A211C6.1                                              |   |
| LYRM2   | LYR motif containing 2                                                | DJ122O8.2                                             |   |
| LYRM5   | LYR motif containing 5                                                |                                                       |   |
| LYRM7   | LYR motif containing 7                                                | C5orf31, MC3DN8, MZM1L                                |   |
| LYSMD2  | Lysmi, putative peptidoglycan-binding,<br>domain containing 2         |                                                       |   |
| LYSMD3  | Lysmi, putative peptidoglycan-binding,<br>domain containing 3         |                                                       |   |
| LYSMD4  | Lysmi, putative peptidoglycan-binding,<br>domain containing 4         |                                                       |   |
| LYST    | Lysosomal trafficking regulator                                       | CHS, CHS1                                             |   |
| LYZL1   | Lysozyme-like 1                                                       | UNQ048/PRO1278, KAAG048, LTC2, PRO1278,<br>LA524C20.1 |   |
| LYZL2   | Lysozyme-like 2                                                       |                                                       |   |
| LZTFL1  | Leucine zipper transcription factor-like 1                            | BBS17                                                 |   |
| LZTS1   | Leucine zipper, putative tumor suppressor 1                           | F37, FEZ1                                             |   |
| MAB21L2 | Mab-21-like 2 ( <i>C. elegans</i> )                                   | MCOPS14                                               |   |
| MACC1   | Metastasis associated in colon cancer 1                               | 7A5, SH3BP4L                                          |   |
| MACF1   | Microtubule-actin crosslinking factor 1                               | ABP620, ACF7, MACF, OFC4                              |   |
| MACROD2 | MACRO domain containing 2                                             | RP11-189J1.1, C20orf133                               |   |
| MAD2L1  | MAD2 mitotic arrest deficient-like 1                                  | HSMAD2, MAD2                                          |   |
| MADD    | MAP-kinase activating death domain                                    | DENN, IG20, RAB3GEP                                   |   |
| MAEA    | Macrophage erythroblast attacher                                      | HLC10, EMLP, EMP, GID9, HLC-10, PIG5                  |   |
| MAEL    | Macronuclear spermatozoan transposon                                  | RP11-102C16.1, CT128, SPATA35                         |   |
| MAF     | v-l-maf avian musculoaponeurotic                                      | CCA4, c-MAF                                           | √ |
| MAFB    | v-l-maf avian musculoaponeurotic                                      | KRML, MCTO                                            | √ |
| MAFK    | v-l-maf avian musculoaponeurotic                                      | NFE2U, P18                                            |   |
| MAGEA1  | Melanoma antigen family A, 1 (affects<br>expression of antigen M72 F) | CT1.1, MAGE1                                          |   |
| MAGEA11 | Melanoma antigen family A, 11                                         | CT1.11, MAGE-11, MAGE11, MAGEA-11                     |   |

|          |                                                                       |                                                                                   |   |
|----------|-----------------------------------------------------------------------|-----------------------------------------------------------------------------------|---|
| MAGEA4   | Melanoma antigen family A, 4                                          | CT1.4, MAGE-41, MAGE-X2, MAGE4, MAGE4A, MAGE4B                                    |   |
| MAGEA5   | Melanoma antigen family A, 5                                          | CT1.5, MAGE5, MAGEA4                                                              |   |
| MAGEB1   | Melanoma antigen family B, 1                                          | CT3.1, DAM10, MAGE-Xp, MAGEL1                                                     |   |
| MAGEB10  | Melanoma antigen family B, 10                                         |                                                                                   |   |
| MAGEB2   | Melanoma antigen family B, 2                                          | CT3.2, DAM6, MAGE-XP-2                                                            |   |
| MAGEB3   | Melanoma antigen family B, 3                                          | CT3.5                                                                             |   |
| MAGEB4   | Melanoma antigen family B, 4                                          | CT3.6                                                                             |   |
| MAG11    | membrane associated guanylate kinase, w w and PDZ domain containing 2 | RP11-881H2.2, AIP-3, AIP3, DAIAP1, DAI-1, DAI1, MAG11, Mag11, TNRC10, WWP2        |   |
| MAG12    | membrane associated guanylate kinase, w w and PDZ domain containing 2 | ACVRIP1, AIP-1, AIP1, ARIP1, MAGI-2, SSCAM                                        |   |
| MAG13    | membrane associated guanylate kinase, w w and PDZ domain containing 2 |                                                                                   |   |
| MAGOHB   | Mago-nashi homolog B (Drosophila)                                     | MGN2, mago, magoh                                                                 |   |
| MAGT1    | Magnesium transporter 1                                               | RP11-217H1.1, IAT, MKX93, OST3B, PRO0730, XMEN_4217H1.1                           |   |
| MAL2     | mal, T-cell differentiation protein 2                                 |                                                                                   |   |
| MALAT1   | metastasis associated lung adenocarcinoma transcript 1                | PRO1073, HCN, LINC00047, MALAT-1, NCRNA00047, NEAT2, PR02853, rna:RNA             | √ |
| MALT1    | lymphoma translocation gene 1                                         | IMD12, MLT, MLT1                                                                  | √ |
| MAMDC2   | MAM domain containing 2                                               | RP11-373A9.2                                                                      |   |
| MAML1    | Mastermind-like 1 (Drosophila)                                        | Mam-1, Mam1                                                                       |   |
| MAN1A1   | Mannosidase, alpha, class 1A, member 1                                | HUMM3, HUMM9, MAN9                                                                |   |
| MAN2A2   | Mannosidase, alpha, class 2A, member 2                                | MANA2X                                                                            |   |
| MANBA    | Mannosidase, beta A, lysosomal                                        | MANB1                                                                             |   |
| MANEA    | Mannosidase, endo-alpha                                               | ENDO, hEndo                                                                       |   |
| MAOA     | Monoamine oxidase A                                                   | RP1-201D17__B.2, MAO-A                                                            |   |
| MAP1A    | Microtubule-associated protein 1A                                     | MAP1L, MTAP1A                                                                     |   |
| MAP1B    | Microtubule-associated protein 1B                                     | FUTSCH, MAP5, PPP1R102                                                            |   |
| MAP1LC3B | microtubule-associated protein 1 light chain 3 beta                   | ATG8F, LC3B, MAP1A/1BLC3-a, MAP1LC3B                                              |   |
| MAP2     | Microtubule-associated protein 2                                      | MAP2AB, MAP2C, MAP2                                                               |   |
| MAP2K1   | Mitogen-activated protein kinase kinase 1                             | CFC3, MAPKK1, MEK1, MKK1, PRKMK1                                                  | √ |
| MAP2K4   | Mitogen-activated protein kinase kinase 4                             | JNKK, JNKK1, MAPKK4, MEK4, MKK4, PRKMK4, MAPKK6, MEK6, MKK6, PRKMK6, SAKK3, SAKK2 | √ |
| MAP2K6   | Mitogen-activated protein kinase kinase 6                             | MAPKK6, MEK6, MKK6, PRKMK6, SAKK3, SAKK2                                          |   |
| MAP3K10  | mitogen-activated protein kinase kinase kinase 10                     | MEKK10, MLK2, MST                                                                 |   |
| MAP3K15  | mitogen-activated protein kinase kinase kinase 15                     | RP11-723P2.3, ASK3, bA723P2.3                                                     |   |
| MAP3K3   | mitogen-activated protein kinase kinase kinase 3                      | MAPKKK3, MEKK3                                                                    |   |
| MAP3K4   | mitogen-activated protein kinase kinase kinase 4                      | IKK3-4/5/10.4, MAPKKK4, MEKK4, MEKK4, MTK1, PR0413                                |   |

|           |                                                               |                                                                                                                                              |  |
|-----------|---------------------------------------------------------------|----------------------------------------------------------------------------------------------------------------------------------------------|--|
| MAP3K8    | mitogen-activated protein kinase kinase kinase                | RP11-449H17.8, COT, EST, ESTT, MEKK8, TPL2, Tpl-2, COT                                                                                       |  |
| MAP3K9    | mitogen-activated protein kinase kinase kinase                | MEKK9, MLK1, PRKE1                                                                                                                           |  |
| MAP4K3    | mitogen-activated protein kinase kinase kinase                | GLK, MAPKKK3, MEKKK 3, MEKKK3, RAB8IPL1                                                                                                      |  |
| MAP4K4    | mitogen-activated protein kinase kinase kinase                | FLH21957, HEL-S-31, HGK, MEKKK4, NIK                                                                                                         |  |
| MAP4K5    | mitogen-activated protein kinase kinase kinase                | GCKR, KHS, KHS1, MAPKKKK5                                                                                                                    |  |
| MAP6      | Microtubule-associated protein 6                              | MTAP6, N-STOP, STOP                                                                                                                          |  |
| MAP6D1    | MAP6 domain containing 1                                      | MAPO6D1, SL21                                                                                                                                |  |
| MAP7      | Microtubule-associated protein 7                              | E-MAP-115, EMAP115                                                                                                                           |  |
| MAP7D2    | MAP7 domain containing 2                                      | RP11-393H10.2                                                                                                                                |  |
| MAP9      | Microtubule-associated protein 9                              | ASAP                                                                                                                                         |  |
| MAPK1     | Mitogen-activated protein kinase 1                            | ERK, ERK-2, ERK2, ERK1, MAPK2, P42MAPK, RP13-51-EB23.1, JNK3, JNK3A1, PRKM10, SAPK10, P38B, P38DELTA2, PRKM11, SAPK2, SAPK2B, p38-2, p38beta |  |
| MAPK10    | Mitogen-activated protein kinase 10                           | RP13-51-EB23.1, JNK3, JNK3A1, PRKM10, SAPK10, P38B, P38DELTA2, PRKM11, SAPK2, SAPK2B, p38-2, p38beta                                         |  |
| MAPK11    | Mitogen-activated protein kinase 11                           | ERK3, ERK6, P38GAMMA, PRKM12, SAPK-3, SAPK3                                                                                                  |  |
| MAPK12    | Mitogen-activated protein kinase 12                           | ERK3, ERK6, P38GAMMA, PRKM12, SAPK-3, SAPK3                                                                                                  |  |
| MAPK14    | Mitogen-activated protein kinase 14                           | RP11-179N10.5, CSDF, CSDF1, CSDF2, CSDF1, EAP, M-3, PRKM14, PRKM15, PRK SAPK2A, p38                                                          |  |
| MAPK1IP1L | mitogen-activated protein kinase 1 interacting protein 1 like | C14orf32, MISS, c14_5346                                                                                                                     |  |
| MAPK4     | Mitogen-activated protein kinase 4                            | ERK-4, ERK4, PRKM4, p63-MAPK, p63MAPK                                                                                                        |  |
| MAPK8IP3  | mitogen-activated protein kinase 8 interacting protein 3      | AC012180.8, JIP3, JSAP1, SYD2, syd                                                                                                           |  |
| MAPK9     | Mitogen-activated protein kinase 9                            | JNK-33, JNK2, JNK2A, JNK2ALPHA, JNK2B, JNK2BETA, PRKM9, SAPK, SAPK1, p54, p54, SAPK                                                          |  |
| MAPKAP1   | mitogen-activated protein kinase associated protein 1         | RP11-269P11.1, JC310, MIP1, SIN1, SIN1b, SIN1g                                                                                               |  |
| MAPKAPK3  | mitogen-activated protein kinase-activated protein kinase 3   | 3PK, MAPKAP-K3, MAPKAP3, MAPKAPK-3, MK-3                                                                                                     |  |
| MAPKBP1   | mitogen-activated protein kinase binding protein 1            | JNKBP-1                                                                                                                                      |  |
| MAPRE1    | microtubule-associated protein, RFLD family member 1          | EB1                                                                                                                                          |  |
| MAPT      | Microtubule-associated protein tau                            | DDIAC, FTDI-17L, MSTD, MTBT1, MTBT2, FTND, PPP1R102, TAIL-MAPT                                                                               |  |
| MARCH1    | Membrane-associated ring finger (C3HC4) domain containing 1   | MARCH-I, RNF171                                                                                                                              |  |
| MARCH3    | Membrane-associated ring finger (C3HC4) domain containing 3   | MARCH-III, RNF173                                                                                                                            |  |
| MARCH5    | Membrane-associated ring finger (C3HC4) domain containing 5   | RP11-543N17.3, MARCH-V, MITOL, RNF153                                                                                                        |  |
| MARCH6    | Membrane-associated ring finger (C3HC4) domain containing 6   | DOA10, MARCH-VI, RNF176, TEB4                                                                                                                |  |
| MARCKS    | Microtubule affinity-regulating protein kinase C substrate 1  | 80K-L, MACS, PKCSL, PRKCSL                                                                                                                   |  |
| MARK1     | Microtubule affinity-regulating kinase 1                      | MARK, Par-1c, Par1c                                                                                                                          |  |
| MARK2     | Microtubule affinity-regulating kinase 2                      | EMK-1, EMK1, PAR-1, Par-1b, Par1b                                                                                                            |  |
| MARS      | Methionyl-tRNA synthetase                                     | METRS, MRS, MTRNS, SPG70                                                                                                                     |  |
| MARVELD1  | MARVEL domain containing 1                                    | RP11-546K25.8, CDT4, MARVD1, MKVELD1, LA548K22.8                                                                                             |  |

|        |                                                               |                                                                |  |
|--------|---------------------------------------------------------------|----------------------------------------------------------------|--|
| MASP1  | Mannan-binding lectin serine peptidase 1 (G1C/G2)             | MSM1, CRAMP, CRAMP1, MAP1, MASP, MASP3, MASP4, PRSS5, P-DE     |  |
| MAST4  | Glycocalyx-associated serine/threonine kinase family member 4 |                                                                |  |
| MAT2A  | Methionine adenosyltransferase II, alpha                      | MATA2, MATII, SAMS2                                            |  |
| MATN2  | Matrilin 2                                                    | UNQ193/PRO219                                                  |  |
| MATN3  | Matrilin 3                                                    | DIPOA, EDM5, HOA, OADIP, OS2                                   |  |
| MATR3  | Matrin 3                                                      | ALS21, MPD2, VCPDM                                             |  |
| MAVS   | Mitochondrial antiviral signaling protein                     | CARDIF, IPS-1, IPS1, VISA                                      |  |
| MB     | Myoglobin                                                     | RP4-569D19.7, PVALB, myoglobin                                 |  |
| MBD1   | Methyl-CpG binding domain protein 1                           | CXXC3, PCM1, RFT                                               |  |
| MBD2   | Methyl-CpG binding domain protein 2                           | DMTase, NY-CO-41                                               |  |
| MBD4   | Methyl-CpG binding domain protein 4                           | MED1                                                           |  |
| MBD5   | Methyl-CpG binding domain protein 5                           | MRD1                                                           |  |
| MBIP   | MAP3K12 binding inhibitory protein 1                          | BM-015                                                         |  |
| MBLAC2 | Metallo-beta-lactamase domain containing 2                    |                                                                |  |
| MBNL1  | Muscleblind-like splicing regulator 1                         | EXP, EXP35, EXP40, EXP42, MBNL                                 |  |
| MBNL2  | Muscleblind-like splicing regulator 2                         | RP11-128N14.1, MBLL, MBLL39, PRO2032                           |  |
| MBNL3  | Muscleblind-like splicing regulator 3                         | RP5-842K24.3, CHCR, MBLX, MBLX39, MBXL                         |  |
| MBOAT1 | membrane bound O-acyltransferase domain containing 1          | RP1-150G2.2, 1, LPEAT1, LPEAT, LPEAT1, LPSAT, OACT1, H424Q11.1 |  |
| MBOAT2 | membrane bound O-acyltransferase domain containing 2          | LPCAT4, OACT2                                                  |  |
| MBP    | Myelin basic protein                                          |                                                                |  |
| MBTD1  | Mbt domain containing 1                                       | SA49P01                                                        |  |
| MBTPS2 | membrane-bound transcription factor 2                         | BRESEK, IFAP, KFSD, KFSDX, OLMSX, S2P                          |  |
| MC2R   | melanocortin 2 receptor (adrenocorticotropic hormone)         | ACTHR                                                          |  |
| MCART6 |                                                               |                                                                |  |
| MCC    | Mutated in colorectal cancers                                 | MCC1                                                           |  |
| MCCC2  | Methylcrotonoyl-CoA carboxylase 2 (beta)                      | MCCB                                                           |  |
| MCFD2  | Multiple coagulation factor deficiency 2                      | F5F8D, F5F8D2, LMAN1IP, SDNSF                                  |  |
| MCL1   | Myeloid cell leukemia 1                                       | BCL2L5, EAT-ES, MCL1E, MCL1S, MCL-1, TM, UC12-L-2, H1/EAT-MCL1 |  |
| MCM10  | minichromosome maintenance complex component 10               | PRO2249, CNA43, DNA43                                          |  |
| MCM3   | minichromosome maintenance complex component 3                | RP1-108C2.3, HCC5, P1-MCM3, P1.h, RLFB                         |  |
| MCM6   | minichromosome maintenance complex component 6                | MCG40308, Mis5, P105MCM                                        |  |
| MCM9   | minichromosome maintenance complex component 9                | RP5-529L24.2, C00H01, MCMDC1, W529L24.1, H220L24.2             |  |
| MCOLN3 | Mucolipin 3                                                   | TRP-ML3, TRPML3                                                |  |



|        |                                           |                                                  |   |
|--------|-------------------------------------------|--------------------------------------------------|---|
| MCPH1  | Microcephalin 1                           | BRIT1, MCT                                       |   |
| MCTP2  | Multiple C2 domains, transmembrane 2      | RP11-4F5.2                                       |   |
| MCTS1  | Malignant T cell amplified sequence 1     | MCT-1, MCT1                                      |   |
| MDFIC  | MyoD family inhibitor domain containing   | HIC                                              |   |
| MDGA1  | MAM domain containing                     | RP3-402N21.1, GPIM, MAMDC3                       |   |
| MDGA2  | MAM domain containing                     | UNQ8188/PRO23197, MAMDC1, c14_5286               |   |
| MDH1B  | Malate dehydrogenase 1B, NAD (soluble)    | RP11-95H11                                       |   |
| MDM1   | Mdm1 nuclear protein homolog (mouse)      |                                                  |   |
| MDM2   | MDM2 proto-oncogene, E3 ubiquitin protein | ACTFS, HDMX, hdm2                                | √ |
| MDM4   | MDM4, p53 regulator                       | RP11-430C7.1, HDMX, MDMX, MRP1                   | √ |
| MDP1   | Magnesium-dependent phosphatase 1         | FN6PASE, MDP-1                                   |   |
| MDS2   | Myelodysplastic syndrome 2 translocation  | RP11-223J15.1                                    | √ |
| ME1    | Malic enzyme 1, NADP(+)-dependent,        | HUMNDME, MES                                     |   |
| ME2    | Malic enzyme 2, NADP(+)-dependent,        | ODS1                                             |   |
| MEA1   | Male-enhanced antigen 1                   | HYS, MEA                                         |   |
| MEAF6  | MYST/Esal-associated factor 6             | RP3-423B22.2, C1orf149, CENP-28, EAF6, NY-SAR-91 |   |
| MECOM  | MDS1 and EVI1 complex locus               | RC3_1040438, AMELT-EVI1, EVI1, MDS1, MDS1-       |   |
| MECP2  | Methyl CpG binding protein 2              | EVI1, RBDM2,                                     |   |
| MED1   | Mediator complex subunit 1                | RS, RTS, RTT,                                    |   |
| MED10  | Mediator complex subunit 10               | CRSP1, CRSP200, DNIF205, DNIF230, FBI, FTAKDI,   |   |
| MED13  | Mediator complex subunit 13               | DRACDB, DR18A, TRAP220, TRIP2                    |   |
| MED13L | Mediator complex subunit 13-like          | L6, NUT2, TRG20                                  |   |
| MED14  | Mediator complex subunit 14               | ARC250, DRIP250, HSPC221, THRAP1, TRAP240        |   |
| MED17  | Mediator complex subunit 17               | PROSIT240, THRAP2, TRAP240L                      |   |
| MED20  | Mediator complex subunit 20               | CRSP130, CRSP12, CSKP, CA014, DNIF150, EXLMT,    |   |
| MED22  | Mediator complex subunit 22               | RCB1, TRAP170                                    |   |
| MED26  | Mediator complex subunit 26               | CRSP6, CRSP77, DRIP80, TRAP80                    |   |
| MED28  | Mediator complex subunit 28               | RP5-973N23.1, PRO0213, TRFP                      |   |
| MED6   | Mediator complex subunit 6                | RP11-244N20.9, MED24, SURF5, surf-5              |   |
| MED8   | Mediator complex subunit 8                | CRSP7, CRSP70                                    |   |
| MED9   | Mediator complex subunit 9                | FKSG20, 1500003D12Rik, EG1, magicin              |   |
| MEF2A  | Myocyte enhancer factor 2A                | ARC33, NY-REN-28                                 |   |
| MEF2C  | Myocyte enhancer factor 2C                | RP1-92O14.5, ARC32                               |   |
|        |                                           | MED25                                            |   |
|        |                                           | ADCAD1, RSRFC4, RSRFC9, mef2                     |   |
|        |                                           | C5DELq14.3, DEL5q14.3                            |   |

|         |                                                    |                                                             |   |
|---------|----------------------------------------------------|-------------------------------------------------------------|---|
| MEG3    | Maternally expressed 3 (non-protein coding)        | FP304, GTE2, LINC00023, NCKNA00023, PRO0518, PR02160, rnhb1 |   |
| MEGF10  | Multiple EGF-like-domains 10                       | EMARDD                                                      |   |
| MEGF11  | Multiple EGF-like-domains 11                       | UNQ1949                                                     |   |
| MEGF9   | Multiple EGF-like-domains 9                        | UNQ671/PRO1305, EGFL5                                       |   |
| MEI1    | Meiosis inhibitor 1                                | RP5-821D11.2, SPATA38                                       |   |
| MEIS2   | Meis homeobox 2                                    | HsT18361, MRG1                                              |   |
| MEIS3P1 | Meis homeobox 3 pseudogene 1                       | MEIS3, MEIS4, MRG2                                          |   |
| MELK    | Maternal embryonic leucine zipper kinase           | maternal embryonic leucine zipper kinase                    |   |
| MEP1A   | Meprin A, alpha (PABA peptide hydrolase)           | PPHA                                                        |   |
| MEPE    | Matrix extracellular phosphoglycoprotein           | OF45                                                        |   |
| MERTK   | MER proto-oncogene, tyrosine kinase                | MER, RP38, c-mer                                            |   |
| MESDC2  | Mesoderm development candidate 2                   | UNQ1911/PRO4369, BOCA, MESD                                 |   |
| MEST    | Mesoderm specific transcript                       | PEG1                                                        |   |
| MET     | MET proto-oncogene, receptor tyrosine kinase       | AUTS9, HGFR, RCCP2, c-Met                                   | √ |
| METAP1  | Methionyl aminopeptidase 1                         | MAP1A, MetAP1A                                              |   |
| METAP2  | Methionyl aminopeptidase 2                         | MAP2, MNPEP, p67, p67eIF2                                   |   |
| METT5D1 |                                                    |                                                             |   |
| METTL1  | Methyltransferase like 1                           | C12orf1, TRM8, TRMT8, YDL201w                               |   |
| METTL10 | Methyltransferase like 10                          | C10orf138, Em:AC068896.3                                    |   |
| METTL12 | Methyltransferase like 12                          | U99HG                                                       |   |
| METTL13 | Methyltransferase like 13                          | CGI-01, 5630401D24Rik, KIAA0859, feat                       |   |
| METTL14 | Methyltransferase like 14                          |                                                             |   |
| METTL2A | Methyltransferase like 2A                          | HSPC266, METTL2                                             |   |
| METTL8  | Methyltransferase like 8                           | TIP                                                         |   |
| METTL9  | Methyltransferase like 9                           | CGI-81, DREV, DREV1, PAP1                                   |   |
| MEX3A   | Mex-3 RNA binding family member A                  | MEX-3A, RKHD4                                               |   |
| MEX3B   | Mex-3 RNA binding family member B                  | MEX-3B, RKHD3, RNF195                                       |   |
| MEX3C   | Mex-3 RNA binding family member C                  | BM-013, MEX-3C, RKHD2, RNF194                               |   |
| MFAP3   | Microfibrillar-associated protein 3                |                                                             |   |
| MFAP3L  | Microfibrillar-associated protein 3-like           | HSD39, NYD-sp9                                              |   |
| MFN1    | Mitofusin 1                                        | hfzo1, hfzo2                                                |   |
| MFSD1   | major facilitator superfamily domain containing 1  | UG0581B09, SMAP4                                            |   |
| MFSD11  | major facilitator superfamily domain containing 11 | ET                                                          |   |

|          |                                                      |                                                |  |
|----------|------------------------------------------------------|------------------------------------------------|--|
| MFSD4    | major facilitator superfamily domain                 | UNQ3064/PRO9894, UNQ3064                       |  |
| MFSD6    | major facilitator superfamily domain                 | MMR2, hMMR2                                    |  |
| MFSD8    | major facilitator superfamily domain                 | CLN7                                           |  |
| MGA      | MGA, MAX dimerization protein                        | MAD5, MXD5                                     |  |
| MGAT2    | mannosyl (alpha-1,6)-glycoprotein beta-1,2-          | CDG2A, CDGS2, GLCNACTII, GNT-II, GNT2          |  |
| MGAT3    | Mannosyl (beta-1,4)-glycoprotein beta-1,4-           | RP5-1104E15.2, GNT-III, GNT3                   |  |
| MGAT4A   | Mannosyl (alpha-1,3)-glycoprotein beta-1,4-          | GNT-IV, GNT-IVA, GnT-4a                        |  |
| MGAT5B   | M <sup>T</sup> B7898annosyl (alpha-1,6)-glycoprotein | GnT-IX, GnT-VB                                 |  |
| MGC11082 |                                                      |                                                |  |
| MGC13053 |                                                      |                                                |  |
| MGC20647 | Uncharacterized protein MGC20647                     |                                                |  |
| MGC21881 |                                                      |                                                |  |
| MGC23284 |                                                      |                                                |  |
| MGC2752  |                                                      |                                                |  |
| MGC2889  | Uncharacterized protein MGC2889                      |                                                |  |
| MGC34034 |                                                      |                                                |  |
| MGC42157 |                                                      |                                                |  |
| MGEA5    | meningioma expressed antigen 5                       | MEA5, NCOAT, OGA                               |  |
| MGLL     | Monoglyceride lipase                                 | HU-K5, HUK5, MAGL, MGL                         |  |
| MGRN1    | mannosyl ring finger 1, E3 ubiquitin                 | RNF156                                         |  |
| MIA2     | Melanoma inhibitory activity 2                       |                                                |  |
| MIA3     | melanoma inhibitory activity family,                 | RP11-576J16.4, ARNT, D520, TANGO, TANGO1,      |  |
| MIAT     | myocardial infarction associated transcript          | U220137, GOMAFU, LINC00000, NCRNA00000,        |  |
| MIB1     | Mindbomb E3 ubiquitin protein ligase 1               | DIP-1, DIP1, LVNC7, MIB, ZZANK2, ZZZ6          |  |
| MICAL2   | microtubule associated monooxygenase,                | MICAL-2PV1, MICAL2PV2, MICAL2                  |  |
| MICAL3   | microtubule associated monooxygenase,                | hCG_21531, MICAL-3                             |  |
| MID2     | Midline 2                                            | RP6-191P20.2, FXY2, MRX101, RNF60, TRIM1       |  |
| MIER1    | mesoderm induction early response 1,                 | RP5-944N15.1, ER1, MI-ER1                      |  |
| MIER3    | mesoderm induction early response 1, family          |                                                |  |
| MINA     | MYC induced nuclear antigen                          | MDIG53, NO52, ROX, MINA                        |  |
| MINK1    | Misshapen-like kinase 1                              | B55, MAP4K6, MINK, YSK2, ZC3, hMINK, hMINKbeta |  |
| MINPP1   | multiple inositol-polyphosphate phosphatase          | RP11-57C13.1, HIPER1, MINPP2, MIPP             |  |
| MIP      | Major intrinsic protein of lens fiber                | AQP0, CTRCT15, LIM126, MP26, MIP               |  |

|         |                                                                                          |                                                                                          |   |
|---------|------------------------------------------------------------------------------------------|------------------------------------------------------------------------------------------|---|
| MIPOL1  | Mirror-image polydactyly 1                                                               |                                                                                          |   |
| MIR17HG | MIR-17-92 cluster host gene (non-protein coding)                                         | RP11-121J7.2, C13orf25, FGLDS2, LINC00046, MIR101, MIR101, MIR101, NCRNA00048, MIR-17-92 |   |
| MIR34A  | MicroRNA 34a                                                                             | MIRN34A, miRNA34A, mir-34                                                                |   |
| MITD1   | MIT1, microtubule interacting and transport, microtubule-associated transcription factor |                                                                                          |   |
| MITF    |                                                                                          | CMM8, MI, WS2, WS2A, bHLHe32                                                             | √ |
| MKI67   | Marker of proliferation Ki-67                                                            | RP11-380J17.2, KIA, MIB-, MIB-1, PPP1R105                                                |   |
| MKL1    | Megakaryoblastic leukemia (translocation) 1                                              | RP5-1042K10.11-009, BSAC, MAL, MRTF-A                                                    | √ |
| MKLN1   | Muskm1, intracellular mediator containing                                                | TWA2                                                                                     |   |
| MKNK1   | MAP kinase interacting serine/threonine kinase 1                                         | RP11-49P4.3, MNK1                                                                        |   |
| MKNK2   | MAP kinase interacting serine/threonine kinase 2                                         | GPRK7, MNK2                                                                              |   |
| MKRN1   | Makorin ring finger protein 1                                                            | RNF61                                                                                    |   |
| MKRN3   | Makorin ring finger protein 3                                                            | CPPB2, D15S9, RNF63, ZFP127, ZNF127                                                      |   |
| MKX     | Makorin ring finger protein 3                                                            | CPPB2, D15S9, RNF63, ZFP127, ZNF127                                                      |   |
| MLANA   | Melan-A                                                                                  | RP11-546N22.1, MART-1, MART1                                                             |   |
| MLEC    | Malectin                                                                                 | KIAA0152                                                                                 |   |
| MLF1    | Myeloid leukemia factor 1                                                                |                                                                                          | √ |
| MLH1    | MutL homolog 1                                                                           | COCA2, FCC2, HNPCC, HNPCC2, hMLH1                                                        | √ |
| MLKL    | Mixed lineage kinase domain-like                                                         | hMLKL                                                                                    |   |
| MLL     |                                                                                          |                                                                                          | √ |
| MLL2    |                                                                                          |                                                                                          |   |
| MLL3    |                                                                                          |                                                                                          | √ |
| MLL5    |                                                                                          |                                                                                          |   |
| MLLT10  | myeloid/lymphoid or mixed-lineage leukemia (with heteromeric core-binding)               | RP11-399C16.2, AF10                                                                      | √ |
| MLLT3   | myeloid/lymphoid or mixed-lineage leukemia (with heteromeric core-binding)               | AF9, YEATS3                                                                              | √ |
| MLLT4   | myeloid/lymphoid or mixed-lineage leukemia (with heteromeric core-binding)               | AF6                                                                                      | √ |
| MLLT6   | myeloid/lymphoid or mixed-lineage leukemia (with heteromeric core-binding)               | AF17                                                                                     | √ |
| MLXIP   | MLX interacting protein                                                                  | MIR, MONDOA, bHLHe36                                                                     |   |
| MMAA    | methylmalonic aciduria (cobalamin deficiency) cblA type with homocystinuria              | cblA                                                                                     |   |
| MMACHC  | methylmalonic aciduria (cobalamin deficiency) cblC type with homocystinuria              | RP11-291L19.3, cblC                                                                      |   |
| MME     | Membrane metallo-endopeptidase                                                           | CALLA, CD10, NEP, SFE                                                                    |   |
| MMGT1   | Membrane magnesium transporter 1                                                         | RP11-274K13.3, EMC5, TMEM32                                                              |   |
| MMP1    | matrix metalloproteinase 1 (interstitial collagenase)                                    | CLG, CLGN                                                                                |   |
| MMP10   | Matrix metalloproteinase 10 (stromelysin 2)                                              | SL-2, STMY2                                                                              |   |

|         |                                                            |                                                                                                                                                                                                                                                                                                                                                                                                                                                                                                                                                                                                                                                                                                                                                                                                                                                                                                                                                                                                                                       |   |
|---------|------------------------------------------------------------|---------------------------------------------------------------------------------------------------------------------------------------------------------------------------------------------------------------------------------------------------------------------------------------------------------------------------------------------------------------------------------------------------------------------------------------------------------------------------------------------------------------------------------------------------------------------------------------------------------------------------------------------------------------------------------------------------------------------------------------------------------------------------------------------------------------------------------------------------------------------------------------------------------------------------------------------------------------------------------------------------------------------------------------|---|
| MMP13   | Matrix metalloproteinase 13 (collagenase 3)                | CLG3, MANDP1, MMP-13                                                                                                                                                                                                                                                                                                                                                                                                                                                                                                                                                                                                                                                                                                                                                                                                                                                                                                                                                                                                                  |   |
| MMP14   | Matrix metalloproteinase 14 (membrane-type-1)              | MMP14, MMP14L1, MMP14L2, MMP14L3, MMP14L4, MMP14L5, MMP14L6, MMP14L7, MMP14L8, MMP14L9, MMP14L10, MMP14L11, MMP14L12, MMP14L13, MMP14L14, MMP14L15, MMP14L16, MMP14L17, MMP14L18, MMP14L19, MMP14L20, MMP14L21, MMP14L22, MMP14L23, MMP14L24, MMP14L25, MMP14L26, MMP14L27, MMP14L28, MMP14L29, MMP14L30, MMP14L31, MMP14L32, MMP14L33, MMP14L34, MMP14L35, MMP14L36, MMP14L37, MMP14L38, MMP14L39, MMP14L40, MMP14L41, MMP14L42, MMP14L43, MMP14L44, MMP14L45, MMP14L46, MMP14L47, MMP14L48, MMP14L49, MMP14L50, MMP14L51, MMP14L52, MMP14L53, MMP14L54, MMP14L55, MMP14L56, MMP14L57, MMP14L58, MMP14L59, MMP14L60, MMP14L61, MMP14L62, MMP14L63, MMP14L64, MMP14L65, MMP14L66, MMP14L67, MMP14L68, MMP14L69, MMP14L70, MMP14L71, MMP14L72, MMP14L73, MMP14L74, MMP14L75, MMP14L76, MMP14L77, MMP14L78, MMP14L79, MMP14L80, MMP14L81, MMP14L82, MMP14L83, MMP14L84, MMP14L85, MMP14L86, MMP14L87, MMP14L88, MMP14L89, MMP14L90, MMP14L91, MMP14L92, MMP14L93, MMP14L94, MMP14L95, MMP14L96, MMP14L97, MMP14L98, MMP14L99, MMP14L100 |   |
| MMP20   | Matrix metalloproteinase 20                                | AI2A2, MMP-20                                                                                                                                                                                                                                                                                                                                                                                                                                                                                                                                                                                                                                                                                                                                                                                                                                                                                                                                                                                                                         |   |
| MMP25   | Matrix metalloproteinase 25                                | MMP25, MMP25L1, MMP25L2, MMP25L3, MMP25L4, MMP25L5, MMP25L6, MMP25L7, MMP25L8, MMP25L9, MMP25L10, MMP25L11, MMP25L12, MMP25L13, MMP25L14, MMP25L15, MMP25L16, MMP25L17, MMP25L18, MMP25L19, MMP25L20, MMP25L21, MMP25L22, MMP25L23, MMP25L24, MMP25L25, MMP25L26, MMP25L27, MMP25L28, MMP25L29, MMP25L30, MMP25L31, MMP25L32, MMP25L33, MMP25L34, MMP25L35, MMP25L36, MMP25L37, MMP25L38, MMP25L39, MMP25L40, MMP25L41, MMP25L42, MMP25L43, MMP25L44, MMP25L45, MMP25L46, MMP25L47, MMP25L48, MMP25L49, MMP25L50, MMP25L51, MMP25L52, MMP25L53, MMP25L54, MMP25L55, MMP25L56, MMP25L57, MMP25L58, MMP25L59, MMP25L60, MMP25L61, MMP25L62, MMP25L63, MMP25L64, MMP25L65, MMP25L66, MMP25L67, MMP25L68, MMP25L69, MMP25L70, MMP25L71, MMP25L72, MMP25L73, MMP25L74, MMP25L75, MMP25L76, MMP25L77, MMP25L78, MMP25L79, MMP25L80, MMP25L81, MMP25L82, MMP25L83, MMP25L84, MMP25L85, MMP25L86, MMP25L87, MMP25L88, MMP25L89, MMP25L90, MMP25L91, MMP25L92, MMP25L93, MMP25L94, MMP25L95, MMP25L96, MMP25L97, MMP25L98, MMP25L99, MMP25L100 |   |
| MMP7    | Matrix metalloproteinase 7 (matrilysin)                    | MMP-7, MPSL1, PUMP-1                                                                                                                                                                                                                                                                                                                                                                                                                                                                                                                                                                                                                                                                                                                                                                                                                                                                                                                                                                                                                  |   |
| MMP8    | Matrix metalloproteinase 8 (neutrophin collagenase)        | CLG1, HNC, MMP-8, PMNL-CL                                                                                                                                                                                                                                                                                                                                                                                                                                                                                                                                                                                                                                                                                                                                                                                                                                                                                                                                                                                                             |   |
| MMRN2   | Multimerin 2                                               | EMILIN-3, EMILIN3, ENDOGLYX-1                                                                                                                                                                                                                                                                                                                                                                                                                                                                                                                                                                                                                                                                                                                                                                                                                                                                                                                                                                                                         |   |
| MN1     | Meningioma (disrupted in balanced translocation) 1         | C1A437G10.1, MGC6, MGC6L1, MGC6L2, MGC6L3, MGC6L4, MGC6L5, MGC6L6, MGC6L7, MGC6L8, MGC6L9, MGC6L10, MGC6L11, MGC6L12, MGC6L13, MGC6L14, MGC6L15, MGC6L16, MGC6L17, MGC6L18, MGC6L19, MGC6L20, MGC6L21, MGC6L22, MGC6L23, MGC6L24, MGC6L25, MGC6L26, MGC6L27, MGC6L28, MGC6L29, MGC6L30, MGC6L31, MGC6L32, MGC6L33, MGC6L34, MGC6L35, MGC6L36, MGC6L37, MGC6L38, MGC6L39, MGC6L40, MGC6L41, MGC6L42, MGC6L43, MGC6L44, MGC6L45, MGC6L46, MGC6L47, MGC6L48, MGC6L49, MGC6L50, MGC6L51, MGC6L52, MGC6L53, MGC6L54, MGC6L55, MGC6L56, MGC6L57, MGC6L58, MGC6L59, MGC6L60, MGC6L61, MGC6L62, MGC6L63, MGC6L64, MGC6L65, MGC6L66, MGC6L67, MGC6L68, MGC6L69, MGC6L70, MGC6L71, MGC6L72, MGC6L73, MGC6L74, MGC6L75, MGC6L76, MGC6L77, MGC6L78, MGC6L79, MGC6L80, MGC6L81, MGC6L82, MGC6L83, MGC6L84, MGC6L85, MGC6L86, MGC6L87, MGC6L88, MGC6L89, MGC6L90, MGC6L91, MGC6L92, MGC6L93, MGC6L94, MGC6L95, MGC6L96, MGC6L97, MGC6L98, MGC6L99, MGC6L100                                                                                         | v |
| MNT     | MAX network transcriptional repressor                      | MAD6, MXD6, ROX, bHLHd3                                                                                                                                                                                                                                                                                                                                                                                                                                                                                                                                                                                                                                                                                                                                                                                                                                                                                                                                                                                                               |   |
| MNX1    | Motor neuron and pancreas homeobox 1                       | HB9, HLXB9, HOXHB9, SCRA1                                                                                                                                                                                                                                                                                                                                                                                                                                                                                                                                                                                                                                                                                                                                                                                                                                                                                                                                                                                                             |   |
| MOBKL1A |                                                            |                                                                                                                                                                                                                                                                                                                                                                                                                                                                                                                                                                                                                                                                                                                                                                                                                                                                                                                                                                                                                                       |   |
| MOBKL2B |                                                            |                                                                                                                                                                                                                                                                                                                                                                                                                                                                                                                                                                                                                                                                                                                                                                                                                                                                                                                                                                                                                                       |   |
| MOBKL2C |                                                            |                                                                                                                                                                                                                                                                                                                                                                                                                                                                                                                                                                                                                                                                                                                                                                                                                                                                                                                                                                                                                                       |   |
| MOBKL3  |                                                            |                                                                                                                                                                                                                                                                                                                                                                                                                                                                                                                                                                                                                                                                                                                                                                                                                                                                                                                                                                                                                                       |   |
| MOBP    | Myelin-associated oligodendrocyte basic protein            |                                                                                                                                                                                                                                                                                                                                                                                                                                                                                                                                                                                                                                                                                                                                                                                                                                                                                                                                                                                                                                       |   |
| MOCS2   | Molybdenum cofactor synthesis 2                            | MCBPE, MOCO1, MOCODB, MPTS                                                                                                                                                                                                                                                                                                                                                                                                                                                                                                                                                                                                                                                                                                                                                                                                                                                                                                                                                                                                            |   |
| MOG     | Myelin oligodendrocyte glycoprotein                        | DAQB-92E24.2, BTN6, BTNL11IG2, NRCLP7, MOG                                                                                                                                                                                                                                                                                                                                                                                                                                                                                                                                                                                                                                                                                                                                                                                                                                                                                                                                                                                            |   |
| MOGS    | Mannosyl-oligosaccharide glucosidase                       | CDG2B, CWH41, DER7, GCS1                                                                                                                                                                                                                                                                                                                                                                                                                                                                                                                                                                                                                                                                                                                                                                                                                                                                                                                                                                                                              |   |
| MON1A   | MON1 secretory trafficking family member A                 | SAND1                                                                                                                                                                                                                                                                                                                                                                                                                                                                                                                                                                                                                                                                                                                                                                                                                                                                                                                                                                                                                                 |   |
| MON1B   | MON1 secretory trafficking family member B                 | HSRG1, SAND2, SRG1                                                                                                                                                                                                                                                                                                                                                                                                                                                                                                                                                                                                                                                                                                                                                                                                                                                                                                                                                                                                                    |   |
| MON2    | MON2 homolog ( <i>S. cerevisiae</i> )                      |                                                                                                                                                                                                                                                                                                                                                                                                                                                                                                                                                                                                                                                                                                                                                                                                                                                                                                                                                                                                                                       |   |
| MORC3   | MORC family CW-type zinc finger 3                          | NXP2, ZCW5, ZCWCC3                                                                                                                                                                                                                                                                                                                                                                                                                                                                                                                                                                                                                                                                                                                                                                                                                                                                                                                                                                                                                    |   |
| MORC4   | MORC family CW-type zinc finger 4                          | RP1-75H8.4, ZCW4, ZCWCC2, dJ75H8.2                                                                                                                                                                                                                                                                                                                                                                                                                                                                                                                                                                                                                                                                                                                                                                                                                                                                                                                                                                                                    |   |
| MORN4   | MORN repeat containing 4                                   | RP11-548K23.4, C10orf83, bA548K23.4                                                                                                                                                                                                                                                                                                                                                                                                                                                                                                                                                                                                                                                                                                                                                                                                                                                                                                                                                                                                   |   |
| MOSC1   |                                                            |                                                                                                                                                                                                                                                                                                                                                                                                                                                                                                                                                                                                                                                                                                                                                                                                                                                                                                                                                                                                                                       |   |
| MOSC2   |                                                            |                                                                                                                                                                                                                                                                                                                                                                                                                                                                                                                                                                                                                                                                                                                                                                                                                                                                                                                                                                                                                                       |   |
| MOSPD1  | Motile sperm domain containing 1                           | RP3-473B4.2, DJ473B4                                                                                                                                                                                                                                                                                                                                                                                                                                                                                                                                                                                                                                                                                                                                                                                                                                                                                                                                                                                                                  |   |
| MOSPD2  | Motile sperm domain containing 2                           |                                                                                                                                                                                                                                                                                                                                                                                                                                                                                                                                                                                                                                                                                                                                                                                                                                                                                                                                                                                                                                       |   |
| MPL     | MPL proto-oncogene, thrombopoietin receptor                | RP1-92O14.1, C-MPL, CD110V, THCYT2, TPOR, MPL                                                                                                                                                                                                                                                                                                                                                                                                                                                                                                                                                                                                                                                                                                                                                                                                                                                                                                                                                                                         | v |
| MPP2    | Membrane protein, palmitoylated 2 (MAGLUK family member 2) | DLG2                                                                                                                                                                                                                                                                                                                                                                                                                                                                                                                                                                                                                                                                                                                                                                                                                                                                                                                                                                                                                                  |   |
| MPP3    | Membrane protein, palmitoylated 3 (MAGLUK family member 3) | DLG3                                                                                                                                                                                                                                                                                                                                                                                                                                                                                                                                                                                                                                                                                                                                                                                                                                                                                                                                                                                                                                  |   |
| MPP4    | Membrane protein, palmitoylated 4 (MAGLUK family member 4) | ALS2CR5, DLG6                                                                                                                                                                                                                                                                                                                                                                                                                                                                                                                                                                                                                                                                                                                                                                                                                                                                                                                                                                                                                         |   |
| MPP5    | Membrane protein, palmitoylated 5 (MAGLUK family member 5) | PALS1                                                                                                                                                                                                                                                                                                                                                                                                                                                                                                                                                                                                                                                                                                                                                                                                                                                                                                                                                                                                                                 |   |



|         |                                                                       |                                                                                  |   |
|---------|-----------------------------------------------------------------------|----------------------------------------------------------------------------------|---|
| MRPS16  | Mitochondrial ribosomal protein S16                                   | CGI-132, COXPD2, MRP-S16, RPMS16                                                 |   |
| MRPS18B | Mitochondrial ribosomal protein S18B                                  | DADD-129D20.0, COG114, HSPC183, HumanS18a,<br>MRP-S18.2, MRPS18.2, PTD017, S18mt |   |
| MRPS23  | Mitochondrial ribosomal protein S23                                   | CGI-138, HSPC329, MRP-S23                                                        |   |
| MRPS25  | Mitochondrial ribosomal protein S25                                   | MRP-S25, RPMS25                                                                  |   |
| MRPS27  | Mitochondrial ribosomal protein S27                                   | MRP-S27, S27mt                                                                   |   |
| MRPS28  | Mitochondrial ribosomal protein S28                                   | HSPC007, MRP-S28, MRP-S35, MRPS35                                                |   |
| MRPS33  | Mitochondrial ribosomal protein S33                                   | CGI-139, MRP-S33, PTD003, S33mt                                                  |   |
| MRPS35  | Mitochondrial ribosomal protein S5                                    | HDCMD11P, MDS023, MRP-S28, MRPS28                                                |   |
| MRPS6   | Mitochondrial ribosomal protein S6                                    | C21orf101, MRP-S6, RPMS6, S6mt                                                   |   |
| MRPS9   | Mitochondrial ribosomal protein S9                                    | MRP-S9, RPMS9, S9mt                                                              |   |
| MRRF    | Mitochondrial ribosome recycling factor                               | MRFF, MTRRF, RRF                                                                 |   |
| MRS2    | MRS2 magnesium transporter                                            | HPTL, MRS2                                                                       |   |
| MRV11   | Murine retrovirus integration site 1 homolog                          | IRAG, JAW1L                                                                      |   |
| MS4A1   | Membrane-spanning 4-domains, subfamily 1 member 1                     | B1, Bp35, CD20, CVID5, LEU-16, MS4A2, S7                                         |   |
| MS4A14  | Membrane-spanning 4-domains, subfamily 14 member 14                   | MS4A16, NYD-SP21                                                                 |   |
| MS4A3   | Membrane-spanning 4-domains, subfamily 3 member 3                     | CD20L, HTM4                                                                      |   |
| MS4A6A  | Membrane-spanning 4-domains, subfamily 6 member 6A                    | CD401, 4SPAN3, 4SPAN3.2, CD20L3, MS4A6, MST000, MST000                           |   |
| MS4A7   | Membrane-spanning 4-domains, subfamily 4 member 7                     | 4SPAN2, CD20L4, CFFM4, MS4A8                                                     |   |
| MSH2    | MutS homolog 2                                                        | COCA1, FCC1, HNPCC, HNPCC1, LCFS2                                                | √ |
| MSI1    | Musashi RNA-binding protein 1                                         |                                                                                  |   |
| MSI2    | Musashi RNA-binding protein 2                                         | MSI2H                                                                            | √ |
| MSL2    | Musashi RNA-binding protein 2                                         | MSI2H                                                                            |   |
| MSL3    | Male-specific lethal 3 homolog (Drosophila)                           | MSL3L1                                                                           |   |
| MSR1    | Macrophage scavenger receptor 1                                       | CD204, SCARA1, SR-A, SRA, phSR1, phSR2                                           |   |
| MSRB3   | Methionine sulfoxide reductase B3                                     | UNQ1965/PRO4487, DFNB74                                                          |   |
| MST1P2  | Macrophage stimulating 1 (hepatocyte growth factor-like) pseudogene 2 |                                                                                  |   |
| MSTN    | Myostatin                                                             | GDF8, MSLHP                                                                      |   |
| MSTO2P  | Misato family member 2, pseudogene                                    | MSTO2                                                                            |   |
| MT1IP   | Metallothionein 1I, pseudogene                                        | MT1, MT1I, MTE                                                                   |   |
| MT1X    | Metallothionein 1X                                                    | MT-1I, MT1                                                                       |   |
| MT2A    | Metallothionein 2A                                                    | MT2                                                                              |   |
| MTA1    | Metastasis associated 1                                               |                                                                                  |   |
| MTAP    | Methylthioadenosine phosphorylase                                     | DDMT, DMST11, DMSTM11, HEL-247, LUMBT, MSA1, 866                                 |   |

|         |                                                                                               |                                              |  |
|---------|-----------------------------------------------------------------------------------------------|----------------------------------------------|--|
| MTBP    | MDM2 binding protein                                                                          | MTBP @ LOVD, MDM2BP                          |  |
| MTCH1   | Mitochondrial carrier 1                                                                       | RP1-90K10.1, CGI-64, PIG60, PSAP, SLC25A49   |  |
| MTCH2   | Mitochondrial carrier 2                                                                       | HSPC032, MIMP, SLC25A50                      |  |
| MTCP1NB |                                                                                               |                                              |  |
| MTDH    | Metadherin                                                                                    | 3D3, AEG-1, AEG1, LYRIC, LYRIC/3D3           |  |
| MTF1    | Metal-regulatory transcription factor 1                                                       | MTF-1, ZRF                                   |  |
| MTF2    | Metal response element binding transcription factor 2                                         | RP5-976O13.1, M96, PCL2, TDRD19A, dJ976O13.2 |  |
| MTFR1   | Mitochondrial fission regulator 1                                                             | CHPPR, FAM54A2                               |  |
| MTHFD1L | Methylenetetrahydrofolate dehydrogenase (NADPH-dependent) like 1                              | RP1-292B18.2, FTHFSDC1, MTC1THFS, dJ292B18.2 |  |
| MTHFD2L | Methylenetetrahydrofolate dehydrogenase (NADPH-dependent) like 2                              |                                              |  |
| MTHFR   | Methylenetetrahydrofolate reductase (NADPH)                                                   | RP11-56N19.4                                 |  |
| MTHFS   | 5,10-methylenetetrahydrofolate synthetase (5-factor) non-heme-like 5, testis-specific (human) | HsT19268                                     |  |
| MTL5    |                                                                                               | CXCDC2, MTLT, TESMIN                         |  |
| MTM1    | Myotubularin 1                                                                                | CNM, MTMX, XLMTM                             |  |
| MTMR1   | Myotubularin related protein 1                                                                |                                              |  |
| MTMR10  | Myotubularin related protein 10                                                               |                                              |  |
| MTMR12  | Myotubularin related protein 12                                                               | 3-PAP, PIP3AP                                |  |
| MTMR14  | Myotubularin related protein 14                                                               | C3orf29                                      |  |
| MTMR15  |                                                                                               |                                              |  |
| MTMR2   | Myotubularin related protein 2                                                                | CMT4B, CMT4B1                                |  |
| MTMR3   | Myotubularin related protein 3                                                                | hCG_2011013, FYVE-DSP1, ZFYVE10              |  |
| MTMR6   | Myotubularin related protein 6                                                                | RP11-271M24.1                                |  |
| MTMR7   | Myotubularin related protein 7                                                                |                                              |  |
| MTMR8   | Myotubularin related protein 8                                                                | RP11-284B18.5                                |  |
| MTP18   |                                                                                               |                                              |  |
| MTPN    | Myotrophin                                                                                    | GCDP, V-1                                    |  |
| MTR     | 5-methyltetrahydrofolate-homocysteine methyltransferase                                       | HMAG, MS, cblG                               |  |
| MTSS1   | Metastasis suppressor 1                                                                       | MIM, MIMA, MIMB                              |  |
| MTUS1   | Microtubule associated tumor suppressor 1                                                     | ATBP, ATIP, ICIS, MP44, MTSG1                |  |
| MTUS2   | Microtubule associated tumor suppressor candidate 2                                           | CAZIP, ICIS, KIAA0774, TIP150                |  |
| MTX2    | MTX2                                                                                          |                                              |  |
| MTX3    | Metaxin 3                                                                                     |                                              |  |
| MUC13   | Mucin 13, cell surface associated                                                             | UNQ6194/PRO20221, DRCC1, MUC-13              |  |



|         |                                                                                  |                                                                            |   |
|---------|----------------------------------------------------------------------------------|----------------------------------------------------------------------------|---|
| MUC17   | Mucin 17, cell surface associated                                                | MUC3                                                                       |   |
| MUC19   | Mucin 19, oligomeric                                                             | MUC-19                                                                     |   |
| MUC20   | Mucin 20, cell surface associated                                                | UNQ2782/PRO7170, MUC-20                                                    |   |
| MUC5AC  | Mucin 5AC, oligomeric mucus/gel-forming                                          | MUC5, TBM, leB                                                             |   |
| MUC7    | Mucin 7, secreted                                                                | MG2                                                                        |   |
| MUDENG  |                                                                                  |                                                                            |   |
| MUL1    | Mitochondrial E3 ubiquitin protein ligase 1                                      | MT11-401MT10.2, C10H100, GIDE, MAFL, MOLAN, DNF310                         |   |
| MUS81   | MUS81 structure-specific endonuclease                                            | SLX3                                                                       |   |
| MUT     | Methylmalonyl CoA mutase                                                         | MCM                                                                        |   |
| MX2     | MX dynamin-like GTPase 2                                                         | MXB                                                                        |   |
| MXD1    | MAX dimerization protein 1                                                       | BHLHC58, MAD, MAD1                                                         |   |
| MXRA7   | Matrix-remodelling associated 7                                                  | PS1TP1, TMAP1                                                              |   |
| MYADM   | Myeloid-associated differentiation marker                                        | UNQ553/PRO1110, SB135                                                      |   |
| MYB     | v-myb avian myeloblastosis viral oncogene homolog-like 1                         | RP1-32B1.1, Cmyb, c-myb, c-myb_CDS, efg                                    | √ |
| MYBL1   | MYBL1                                                                            | A-MYB, AMYB                                                                |   |
| MYBPC1  | Myosin binding protein C, slow type                                              | LCCS4, MYBPCC, MYBPCS                                                      |   |
| MYCBP   | MYC binding protein                                                              | AMY-1                                                                      |   |
| MYCBP2  | MYC binding protein 2, E3 ubiquitin protein ligase                               | AC001226.5, PAM                                                            |   |
| MYCBPAP | MYCBP associated protein                                                         | AMAP-1, AMAP1                                                              |   |
| MYCN    | v-myc avian myelocytomatosis viral oncogene neuroblastoma derived homolog-like 1 | MODED, N-myc, NMYC, ODED, bHLHe37                                          | √ |
| MYEF2   | Myelin expression factor 2                                                       | HsT18564, MEF-2, MST156, MSTP156, myEF-2                                   |   |
| MYEOV   | Myeloma overexpressed                                                            | OCIM                                                                       |   |
| MYH10   | Myosin, heavy chain 10, non-muscle                                               | NMMHC-IIB, NMMHCB                                                          |   |
| MYH11   | Myosin, heavy chain 11, smooth muscle                                            | AAT4, FAA4, SMHC, SMMHC                                                    | √ |
| MYH15   | Myosin, heavy chain 15                                                           |                                                                            |   |
| MYH7B   | myosin, heavy chain 7B, cardiac muscle, beta                                     | RP4-756N5.1, MHC14, MYH14                                                  |   |
| MYL1    | Myosin, light chain 1, alkali; skeletal, fast                                    | MLC1F, MLC3F                                                               |   |
| MYL6    | myosin, light chain 6, alkali, smooth muscle and non-muscle                      | ESMLEC, LCT7, LCT7-G1, LCT7-NM, LCT7A, LCT7B, MLC2, MLC1SM, MLC2NM, MLC2SM |   |
| MYLK3   | Myosin light chain kinase 3                                                      | RP11-480G7.1, MLCK, MLCK2, caMLCK                                          |   |
| MYLK4   | Myosin light chain kinase family, member 4                                       | RP11-145H9.1, SgK085                                                       |   |
| MYO10   | Myosin X                                                                         |                                                                            |   |
| MYO15A  | Myosin XVA                                                                       | DFNB3, MYO15                                                               |   |
| MYO16   | Myosin XVI                                                                       | MT11-54117.1, MY1AF3, MY1K6, MYO100, MY1AF5, PPP1B107                      |   |

|         |                                                        |                                                    |  |
|---------|--------------------------------------------------------|----------------------------------------------------|--|
| MYO18A  | Myosin XVIII A                                         | MYSPDZ, SPR210                                     |  |
| MYO1C   | Myosin IC                                              | MMI-beta, MM1b, NMI, myr2                          |  |
| MYO1D   | Myosin ID                                              | PPP1R108, myr4                                     |  |
| MYO1E   | Myosin IE                                              | FSGS6, HuncM-IC, MYO1C                             |  |
| MYO3A   | Myosin IIIA                                            | DFNB30                                             |  |
| MYO3B   | Myosin IIIB                                            |                                                    |  |
| MYO5A   | Myosin VA (heavy chain 12, myoxin)                     | GS1, MYH12, MYO5, MYR12                            |  |
| MYO5B   | Myosin VB                                              |                                                    |  |
| MYO5C   | Myosin VC                                              |                                                    |  |
| MYO6    | Myosin VI                                              | RP3-472A9.1, DFNA22, DFNB37                        |  |
| MYO7B   | Myosin VIIB                                            | hCG_42606                                          |  |
| MYO9B   | Myosin IXB                                             | CELIAC4, MYR5                                      |  |
| MYOCD   | Myocardin                                              | MYCD                                               |  |
| MYOM1   | Myomesin 1                                             | SKELEMIN                                           |  |
| MYOM3   | Myomesin 3                                             | RP11-293P20.1                                      |  |
| MYOZ3   | Myomesin 3                                             | RP11-293P20.1                                      |  |
| MYPN    | Myopalladin                                            | CMD1DD, CMH22, MYOP, RCM4                          |  |
| MYRIP   | Myosin VIIA and Rab interacting protein                | SLAC2-C, SLAC2C                                    |  |
| MYSM1   | Myb-like, SWIRM and MPN domains 1                      | RP4-592A1.1, 2A-DUB, 2ADUB                         |  |
| MYST2   | K(lysine) acetyltransferase 7                          | HBO1, HBOA, MYST2, ZC2HC7                          |  |
| MYST3   | K(lysine) acetyltransferase 6A                         | MOZ, MYST3, RUNXBP2, ZC2HC6A, ZNF220               |  |
| N4BP1   | NEDD4 binding protein 1                                |                                                    |  |
| N4BP2L1 | NEDD4 binding protein 2-like 1                         | RP11-298P3.2, CG018                                |  |
| N4BP3   | NEDD4 binding protein 3                                | LZTS4                                              |  |
| N6AMT1  | N(6)-adenine-specific DNA methyltransferase 1          | FKED28, C210H127, HEMK2, MTQ2, N6AMT1, HsaHsaK2P   |  |
| NAA15   | N(alpha)-acetyltransferase 15, NAT A                   | Ga19, NARG1, NAT1P, NATH, TBDN, TBDN100            |  |
| NAA16   | N(alpha)-acetyltransferase 16, NAT A                   | RP11-396A22.1, NARG1L                              |  |
| NAA25   | N(alpha)-acetyltransferase 25, NAT D                   | C12orf30, MDM20, NAP1                              |  |
| NAA30   | N(alpha)-acetyltransferase 30, NAT C catalytic subunit | C14orf35, MAK3, Mak3p, NAT12, NAT12P               |  |
| NAA35   | N(alpha)-acetyltransferase 35, NAT C                   | RP11-379P1.1, EGAP, MAK10, MAK10P, bA379P1.1       |  |
| NAA40   | N(alpha)-acetyltransferase 40, NAT D catalytic subunit | NAT11, PATT1                                       |  |
| NAA50   | N(alpha)-acetyltransferase 50, NAT E catalytic subunit | MAK5, NAT15, NAT15I, NAT5, NAT5I, SAN, hNAT5, hSAN |  |
| NAAA    | N-acylethanolamine acid amidase                        | ASAHL, PLT                                         |  |

|           |                                                                                                                    |                                             |  |
|-----------|--------------------------------------------------------------------------------------------------------------------|---------------------------------------------|--|
| NAALAD2   | N-acetylated alpha-linked acidic dipeptidase                                                                       | GCPIII, GPCIII, NAADALASE2, NAALADASE2      |  |
| NAALADL2  | N-acetylated alpha-linked acidic dipeptidase-like 2                                                                |                                             |  |
| NAB1      | Nucleolar 1-A binding protein 1 (EOK1 binding nucleus accumbens associated 1, DEN and BTP (BOZ) domain containing) |                                             |  |
| NACC1     | nucleus accumbens associated 1, DEN and BTP (BOZ) domain containing                                                | BEND8, BTBD14B, BTBD30, NAC-1, NAC1         |  |
| NAE1      | NEDD8 activating enzyme E1 subunit 1                                                                               | HPP1, A-116A10.1, APPBP1, ula-1             |  |
| NAF1      | nuclear assembly factor 1 ribonucleoprotein                                                                        |                                             |  |
| NAIP      | NLR family, apoptosis inhibitory protein                                                                           | BIRC1, NLRB1, psiNAIP                       |  |
| NAMPT     | Nicotinamide phosphoribosyltransferase                                                                             | 1110035O14Rik, PBEF, PBEF1, VF, VISFATIN    |  |
| NANP      | N-acetylneuraminic acid phosphatase                                                                                | C20orf147, HDHD4, dJ694B14.3                |  |
| NANS      | N-acetylneuraminic acid synthase                                                                                   | RP11-404F11.3, HEL-S-100, SAS               |  |
| NAP1L1    | Nucleosome assembly protein 1-like 1                                                                               | NAP1, NAP1L, NRP                            |  |
| NAP1L2    | Nucleosome assembly protein 1-like 2                                                                               | BPX                                         |  |
| NAP1L5    | Nucleosome assembly protein 1-like 5                                                                               | DRLM                                        |  |
| NAPB      | N-acetylmaleimide-sensitive factor attachment protein beta                                                         | RP3-322G13.2, SNAP-BETA, SNAPB              |  |
| NARF      | Nuclear prelamin A recognition factor                                                                              | IOP2                                        |  |
| NARG2     |                                                                                                                    |                                             |  |
| NAV1      | Neuron navigator 1                                                                                                 | POMFIL3, STEERIN1, UNC53H1                  |  |
| NAV2      | Neuron navigator 2                                                                                                 | HELAD1, POMFIL2, RAINB1, STEERIN2, UNC53H2  |  |
| NBEA      | Neurobeachin                                                                                                       | RP11-270C18.1, BCL8B, LYST2                 |  |
| NBL1      | Neuroblastoma 1, DAN family DMR antagonist                                                                         | RP5-1056L3.4, D1S1733E, DAN, DAND1, NB, NO3 |  |
| NBLA00301 | HAND2 antisense RNA 1 (head to head)                                                                               | DEIN; NBLA00301                             |  |
| NBN       | Nibrin                                                                                                             | AT-V1, AT-V2, ATV, NBS, NBS1, P95           |  |
| NBPF10    | Neuroblastoma breakpoint family, member 10                                                                         | RP11-458D21.4, AB6, AG1, NBPF9              |  |
| NBPF11    | Neuroblastoma breakpoint family, member 11                                                                         | RP11-94I2.2, NBPF24                         |  |
| NBPF14    | Neuroblastoma breakpoint family, member 14                                                                         | RP3-328E19.1, DJ328E19.C1.1, NBPF           |  |
| NBPF15    | Neuroblastoma breakpoint family, member 15                                                                         | RP11-763B22.1, AB14, AG3, NBPF16            |  |
| NBPF16    | Neuroblastoma breakpoint family, member 16                                                                         | AG3                                         |  |
| NBPF22P   | Neuroblastoma breakpoint family, member 22                                                                         |                                             |  |
| NBPF3     | Neuroblastoma breakpoint family, member 3                                                                          | RP11-293F5.5, AE2                           |  |
| NBPF4     | Neuroblastoma breakpoint family, member 4                                                                          | RP11-483I13.1                               |  |
| NBPF5     | Neuroblastoma breakpoint family, member 5                                                                          | DKFZp434D177-like, RP11-242D10.1            |  |
| NBPF8     | Neuroblastoma breakpoint family, member 8                                                                          | RP3-377D14.1P, NBPF8                        |  |
| NBR1      | Neighbor of BRCA1 gene 1                                                                                           | MIG19, 1A1-3B, IAI3B, M17S2                 |  |

|            |                                                                    |                                                                                                     |   |
|------------|--------------------------------------------------------------------|-----------------------------------------------------------------------------------------------------|---|
| NBR2       | Neighbor of BRCA1 gene 2 (non-protein coding)                      | NCRNA00192                                                                                          |   |
| NCALD      | Neurocalcin delta                                                  |                                                                                                     |   |
| NCAM1      | Neural cell adhesion molecule 1                                    | CD56, MSK39, NCAM                                                                                   |   |
| NCAPG      | Non-SMC condensin I complex, subunit G                             | CAPG, CHCG, NY-MEL-3, YCG1                                                                          |   |
| NCAPG2     | Non-SMC condensin II complex, subunit G2                           | tcag7.1258, CAP-G2, CAPG2, LUZP5, MTB, hCAP-G2                                                      |   |
| NCAPH      | Non-SMC condensin I complex, subunit H                             | BRRN1, CAP-H                                                                                        |   |
| NCAPH2     | Non-SMC condensin II complex, subunit H2                           |                                                                                                     |   |
| NCBP1      | Nuclear cap binding protein subunit 1, 80 kDa                      | RP11-546O6.1, CBP80, NCBP, Sto1                                                                     |   |
| NCBP2      | Nuclear cap binding protein subunit 2, 20 kDa                      | PIG55, CBC2, CBP20, NIP1                                                                            |   |
| NCCRP1     | Non-specific cytotoxic cell receptor protein 1 homolog (zebrafish) | FBXO50, NCCRP-1                                                                                     |   |
| NCEH1      | Neutral cholesterol ester hydrolase 1                              | AADAACL1, NCEH                                                                                      |   |
| NCK2       | NCK adaptor protein 2                                              | GRB4, NCKbeta                                                                                       |   |
| NCKAP5     | NCK-associated protein 5                                           | ERIH1, ERIH2, NAP5                                                                                  |   |
| NCKIPSD    | NCK interacting protein with SH3 domain                            | AT5F21, DIF, DIF1, GNP1, SPIN90, VIF54, WASEB1, WISL                                                |   |
| NCL        | Nucleolin                                                          | C23                                                                                                 |   |
| NCOA1      | Nuclear receptor coactivator 1                                     | F-SRC-1, KAT13A, RIP160, SRC1, bHLHe42, bHLHe74                                                     | √ |
| NCOA2      | Nuclear receptor coactivator 2                                     | GRIP1, KAT13C, NCoA-2, SRC2, TIF2, bHLHe75                                                          | √ |
| NCOA3      | Nuclear receptor coactivator 3                                     | KF5-1049G10.5, ACTR, AID-1, AID1, CA0110, CTS-118, KAT13B, BAF3, SRC2, SRC3, SPG2, TRAF250, TRAF251 |   |
| NCOA6      | Nuclear receptor coactivator 6                                     | PPP1F6, J11.1, LKAT140, LSINAI-AS, INDIA00052, NCL-10002, TLDCA, J1187H1.2, NCOA7                   |   |
| NCOA7      | Nuclear receptor coactivator 7                                     | N-CoR, N-CoR1, PPP1R109, TRAC1, hN-CoR                                                              |   |
| NCOR1      | Nuclear receptor corepressor 1                                     | KF1-149M16.2, CD550, L195, INK-p44, INK44, J1140M18.1                                               |   |
| NCR2       | Natural cytotoxicity triggering receptor 2                         |                                                                                                     |   |
| NCRNA00051 |                                                                    |                                                                                                     |   |
| NCRNA00085 | Sperm acrosome associated 6, pseudogene                            | LINC00085, NCRNA00085, SPACA6, SPACA6P                                                              |   |
| NCRNA00086 |                                                                    |                                                                                                     |   |
| NCRNA00094 |                                                                    |                                                                                                     |   |
| NCRNA00095 |                                                                    |                                                                                                     |   |
| NCRNA00103 |                                                                    |                                                                                                     |   |
| NCRNA00107 |                                                                    |                                                                                                     |   |
| NCRNA00119 |                                                                    |                                                                                                     |   |
| NCRNA00120 |                                                                    |                                                                                                     |   |
| NCRNA00171 |                                                                    |                                                                                                     |   |
| NCRNA00173 |                                                                    |                                                                                                     |   |

|             |                                            |                                        |  |
|-------------|--------------------------------------------|----------------------------------------|--|
| NCRNA00176  |                                            |                                        |  |
| NCRNA00181  |                                            |                                        |  |
| NCRNA00183  |                                            |                                        |  |
| NCRNA00189  |                                            |                                        |  |
| NCRNA00203  |                                            |                                        |  |
| NCRNA00204B |                                            |                                        |  |
| NCRNA00222  |                                            |                                        |  |
| NCRNA00236  |                                            |                                        |  |
| NCS1        | Neuronal calcium sensor 1                  | FLUP, FREQ                             |  |
| NDEL1       | NudE neurodevelopment protein 1-like 1     | EOPA, MITAP1, NDE1L1, NDE2, NUDEL      |  |
| NDFIP2      | Nedd4 family interacting protein 2         | N4WBP5A                                |  |
| NDRG2       | NDRG family member 2                       | SYLD                                   |  |
| NDRG3       | NDRG family member 3                       | RP3-460J8.1                            |  |
| NDRG4       | NDRG family member 4                       | BDM1, SMAP-8, SMAP8                    |  |
| NDST2       | N-acetylase/N-sulfotransferase (heparan    | HSST2, NST2                            |  |
| NDUFA10     | NADH dehydrogenase (ubiquinone) 1 alpha    | CI-42KD, CI-42k                        |  |
| NDUFA4      | NDUFA4, mitochondrial complex associated   | CI-9k, CI-MLRQ, MLRQ                   |  |
| NDUFA5      | NADH dehydrogenase (ubiquinone) 1 alpha    | B13, CI-13KD-B, CI-13kB, NUFM, UQOR13  |  |
| NDUFA7      | NADH dehydrogenase (ubiquinone) 1 alpha    | B14.5a                                 |  |
| NDUFAB1     | NADH dehydrogenase (ubiquinone) 1,         | ACP, FASN2A, SDAP                      |  |
| NDUFAF2     | NADH dehydrogenase (ubiquinone)            | B17.2L, MMTN, NDUFA12L, mimitin        |  |
| NDUFAF3     | NADH dehydrogenase (ubiquinone)            | 2P1, C3orf60, E3-3                     |  |
| NDUFB1      | NADH dehydrogenase (ubiquinone) 1 beta     | CI-MNLL, CI-SGDH, MNLL                 |  |
| NDUFB5      | NADH dehydrogenase (ubiquinone) 1 beta     | CISGDH, SGDH                           |  |
| NDUFS3      | NADH dehydrogenase (ubiquinone) Fc-3       | CI-30                                  |  |
| NEAT1       | nuclear paraspeckle assembly transcript 1  | LINC00084, NCRNA00084, TncRNA, VINC    |  |
| NEB         | Nebulin                                    | NEB177D, NEM2                          |  |
| NEBL        | Nebulette                                  | RP11-56H7.1, LASP2, LNEBL              |  |
| NECAB1      | N-terminal EF-hand calcium binding protein | EFCBP1, STIP-1                         |  |
| NEDD4       | Neural precursor cell expressed,           | PIG53-1, RPF1, NEDD4                   |  |
| NEDD4L      | Neural precursor cell expressed,           | NEDD4-2, NEDD4.2, RSP5, hNEDD4-2       |  |
| NEFH        | Neurofilament, heavy polypeptide           | NFH                                    |  |
| NEGR1       | Neuronal growth regulator 1                | UNQ2433, DMML2433, IGLON4, KILON, Ntra |  |

|          |                                                                                |                                                                                           |   |
|----------|--------------------------------------------------------------------------------|-------------------------------------------------------------------------------------------|---|
| NEK1     | NIMA-related kinase 1                                                          | NY-REN-55, SRPS2, SRPS2A, SRTD6                                                           |   |
| NEK11    | NIMA-related kinase 11                                                         |                                                                                           |   |
| NEK4     | NIMA-related kinase 4                                                          | NRK2, STK2, pp12301                                                                       |   |
| NEK7     | NIMA-related kinase 7                                                          |                                                                                           |   |
| NEK9     | NIMA-related kinase 9                                                          | NERCC, NERCC1, Nek8                                                                       |   |
| NELL1    | NEL-like 1 (chicken)                                                           | IDH3GL, NRP1                                                                              |   |
| NELL2    | NEL-like 2 (chicken)                                                           | NRP2                                                                                      |   |
| NEO1     | Neogenin 1                                                                     | IGDCC2, NGN, NTN1R2                                                                       |   |
| NET1     | Neuroepithelial cell transforming 1                                            | RP11-116G8.1, ARHGEF8A, NET1                                                              |   |
| NETO1    | Neuropilin (NRP) and tolloid (TLL)-like 1                                      | RP11-713C5.1, BCTL1, BTCL1                                                                |   |
| NEURL1B  | Neuralized E3 ubiquitin protein ligase 1B                                      | NEURL3, hNeur2, neur2                                                                     |   |
| NEUROD1  | Neuronal differentiation 1                                                     | BETA2, BHF-1, MODY6, NEUROD, bHLHa3                                                       |   |
| NEUROG2  | Neurogenin 2                                                                   | Atoh4, Math4A, NGN2, bHLHa8, ngn-2                                                        |   |
| NEXN     | Nexilin (F actin binding protein)                                              | CMH20, NELIN                                                                              |   |
| NF1      | Neurofibromin 1                                                                | NFNS, VRNF, WSS                                                                           | √ |
| NF2      | Neurofibromin 2 (merlin)                                                       | ACN, BANF, SCH                                                                            | √ |
| NFAM1    | NFAT activating protein with ITAM motif 1                                      | CTA-126B4.4, CNAIP, bK126B4.4                                                             |   |
| NFASC    | Neurofascin                                                                    | RP11-494K3.1, NF, NRCAML                                                                  |   |
| NFAT5    | nuclear factor of activated T-cells 5, tonicity-responsive                     | RP11-511C24.1, NF-AT5, NFATL1, NFAT2, OKEDI, TONEDD                                       |   |
| NFATC1   | nuclear factor of activated T-cells, 1                                         | NF-ATC, NFAT2, NFATc                                                                      |   |
| NFATC2IP | nuclear factor of activated T-cells, 2                                         | ESC2, NIP45, RAD60                                                                        |   |
| NFATC4   | nuclear factor of activated T-cells, 4                                         | NF-AT3, NF-ATC4, NFAT3                                                                    |   |
| NFE2L2   | Nuclear factor, erythroid 2-like 2                                             | NRF2                                                                                      | √ |
| NFIA     | Nuclear factor I/A                                                             | RP5-902P15.1, CTF, NF-I/A, NF1-A, NFI-A, NFI-L                                            |   |
| NFIB     | Nuclear factor I/B                                                             | RP11-280G24.2, CTF, TIMGIC/NFIB, NF-I/B, NFI-B, NFI-D, NFI-BE2, NFI-BE3, NFI-BE2, NFI-BE1 | √ |
| NFKBIZ   | nuclear factor of kappa light polypeptide gene enhancer in B-cells inhibitor-3 | IKBZ, INAP, MAIL                                                                          |   |
| NFXL1    | nuclear transcription factor, X-box binding protein 1                          | CDZFP, HOZFP, OZFP, URCC5                                                                 |   |
| NFYA     | Nuclear transcription factor Y, alpha                                          | CBF-A, CBF-B, HAP2, NF-YA                                                                 |   |
| NFYB     | Nuclear transcription factor Y, beta                                           | CBF-A, CBF-B, HAP3, NF-YB                                                                 |   |
| NFYC     | Nuclear transcription factor Y, gamma                                          | RP5-1006H15.1, CBF-C, CBFc, H1112A, HAF3, HSM1, NF-YC                                     |   |
| NGEF     | Neuronal guanine nucleotide exchange factor                                    | ARHGEF27, EPHEXIN                                                                         |   |
| NHLRC1   | NHL repeat containing E3 ubiquitin protein ligase 1                            | EPM2A, EPM2B, MALIN, bA204B7.2                                                            |   |
| NHLRC2   | NHL repeat containing 2                                                        | 1200003G01Rik, AI835049, AV002846, AW496455                                               |   |

|           |                                                                   |                                                                                |   |
|-----------|-------------------------------------------------------------------|--------------------------------------------------------------------------------|---|
| NHLRC3    | NHL repeat containing 3                                           | RP11-50D16.3                                                                   |   |
| NHP2      | NHP2 ribonucleoprotein                                            | HSPC286, DKCB2P, NOLA2, NHP2                                                   |   |
| NHS       | Nance-Horan syndrome (congenital cataracts and dental anomalies)  | RP3-389A20.6, CTRCT40, CXN, SCML1                                              |   |
| NHSL1     | NHS-like 1                                                        | C6orf63                                                                        |   |
| NICN1     | Nicolin 1                                                         |                                                                                |   |
| NID1      | Nidogen 1                                                         | NID                                                                            |   |
| NID2      | Nidogen 2 (osteonidogen)                                          | NID-2                                                                          |   |
| NIN       | Ninein (GSK3B interacting protein)                                | SCKL7                                                                          | v |
| NINL      | Ninein-like                                                       | RP4-691N24.1, NLP, dJ691N24.1                                                  |   |
| NIPA1     | Non imprinted in Prader-Willi/Angelman syndrome 1                 | FSP3, SPG6                                                                     |   |
| NIPA2     | Non imprinted in Prader-Willi/Angelman syndrome 2                 |                                                                                |   |
| NIPAL2    | NIPA-like domain containing 2                                     | NPAL2                                                                          |   |
| NIPAL3    | NIPA-like domain containing 3                                     | RP3-462O23.3, DJ462O23.2, NPAL3                                                |   |
| NIPAL4    | NIPA-like domain containing 4                                     | ARCI6, ICHTHYIN, ICHYN                                                         |   |
| NIPBL     | Nipped-B homolog (Drosophila)                                     | CDLS, CDLS1, IDN3, IDN3-B, Scc2                                                |   |
| NIPSNAP3B | Nipsnap homolog 3B (C. elegans)                                   | NIPSNAP3                                                                       |   |
| NISCH     | Nischarin                                                         | I-1, IR1, IRAS, hIRAS                                                          |   |
| NKAIN2    | Na <sup>+</sup> /K <sup>+</sup> transporting ATPase interacting 2 | RP1-305A19.1, FAM77B, NKAIP2, TCBA, TCBA1                                      |   |
| NKIRAS1   | NFKB inhibitor interacting Ras-like 1                             | KBRAS1, kappaB-Ras1                                                            |   |
| NKRF      | NFKB repressing factor                                            | ITBA4, NRF                                                                     |   |
| NKTR      | Natural killer cell triggering receptor                           | p104                                                                           |   |
| NKX2-2    | NK2 homeobox 2                                                    | NKX2.2, NKX2B                                                                  |   |
| NKX2-4    | NK2 homeobox 4                                                    | RP11-227D2.4, NKX2.4, NKX2D                                                    |   |
| NKX3-2    | NK3 homeobox 2                                                    | BAPX1, NKX3.2, NKX3B, SMMD                                                     |   |
| NLE1      | Notchless homolog 1 (Drosophila)                                  | HUSSY-07, Nle                                                                  |   |
| NLGN1     | Neurologin 1                                                      | NL1                                                                            |   |
| NLGN2     | Neurologin 2                                                      |                                                                                |   |
| NLGN4X    | Neurologin 4, X-linked                                            | UTNQ565/PRO701, ASPGAZ, AUTSAZ, HENNA, HINL4X, NLGN4                           |   |
| NLGN4Y    | Neurologin 4, Y-linked                                            |                                                                                |   |
| NLK       | Nemo-like kinase                                                  |                                                                                |   |
| NLN       | Neurolysin (metallopeptidase M3 family)                           | AGTBP, EP24.16, MEP, MOP                                                       |   |
| NLRC5     | NLR family, CARD domain containing 5                              | CLR16.1, NOD27, NOD4                                                           |   |
| NLRP1     | NLR family, pyrin domain containing 1                             | CARD7, CIDED, CLR17.1, DEFCAT, DEFCAT-L/S, NLRC5, NALP1, PR1044, SLEV1, VAMAS1 |   |

|          |                                                        |                                                            |   |
|----------|--------------------------------------------------------|------------------------------------------------------------|---|
| NLRP8    | NLR family, pyrin domain containing 8                  | CLR19.2, NALP8, NOD16, PAN4                                |   |
| NLRP9    | NLR family, pyrin domain containing 9                  | CLR19.1, NALP9, NOD6, PAN12                                |   |
| NMD3     | NMD3 ribosome export adaptor                           | CGI-07                                                     |   |
| NME4     | NME/NUM25 nucleoside diphosphate kinase 4              | Z97634.4-011, NDPK-D, NM23H4, nm23-H4                      |   |
| NME6     | NME/NUM25 nucleoside diphosphate kinase 6              | IPIA-ALPHA, NDK 6, NM23-H6                                 |   |
| NME7     | NME/NUM25 nucleoside diphosphate kinase 7              | CFAP67, MN23H7, NDK 7, NDK7, nm23-H7                       |   |
| NMI      | N-myc (and STAT) interactor                            |                                                            |   |
| NMNAT2   | Nicotinamide nucleotide adenyltransferase 2            | RP11-181K3.3, C1orf15, PNAT2                               |   |
| NMT1     | N-myristoyltransferase 1                               | NMT                                                        |   |
| NMT2     | N-myristoyltransferase 2                               | RP11-455B2.2                                               |   |
| NNAT     | Neuronatin                                             | Peg5                                                       |   |
| NNT      | Nicotinamide nucleotide transhydrogenase               | hCG_17428, GCCD4                                           |   |
| NOC3L    | Nucleolar complex associated 3 homolog (Drosophila)    | AD24, C10orf117, FAD24                                     |   |
| NOD1     | Nucleotide-binding oligomerization domain containing 1 | CARD4, CLR7.1, NLRC1                                       |   |
| NOD2     | Nucleotide-binding oligomerization domain containing 2 | ACCG, BLAU, CARD15, CD, CLR10.3, IBD1, NLRC2, PSQAS1, NOD2 |   |
| NOG      | Noggin                                                 | SYM1, SYNS1                                                |   |
| NOL4     | Nucleolar protein 4                                    | HRIHFB2255, CT125, NOLP                                    |   |
| NOL8     | Nucleolar protein 8                                    | RP11-62C3.9, C9orf34, NOP132, bA62C3.3, bA62C3.4           |   |
| NOL9     | Nucleolar protein 9                                    | Grc3, NET6                                                 |   |
| NOLC1    | Nucleolar and coiled-body phosphoprotein 1             | NOPP130, NOPP140, NS5ATP13, P130                           |   |
| NOM1     | Nucleolar protein with MIF4G domain 1                  | C7orf3, PPP1R113, SGD1                                     |   |
| NOMO1    | NODAL modulator 1                                      | Nomo, PM5                                                  |   |
| NOMO2    | NODAL modulator 2                                      | Nomo, PM5                                                  |   |
| NOMO3    | NODAL modulator 3                                      | Nomo                                                       |   |
| NOP58    | NOP58 ribonucleoprotein                                | HSPC120, NOP5, NOP5/NOP58                                  |   |
| NOS1     | Nitric oxide synthase 1 (neuronal)                     | IHPS1, N-NOS, NC-NOS, NOS, bNOS, nNOS                      |   |
| NOS1AP   | Nitric oxide synthase 1 (neuronal) adaptor protein     | 6330408P19Rik, CAPON                                       |   |
| NOS3     | Nitric oxide synthase 3 (endothelial cell)             | ECNOS, eNOS                                                |   |
| NOTCH2   | Notch 2                                                | AGS2, HJCYS, hN2                                           | v |
| NOTCH2NL | Notch 2 N-terminal like                                | N2N                                                        |   |
| NOTCH3   | Notch 3                                                | CADASIL, CASIL, IMF2                                       |   |
| NOTCH4   | Notch 4                                                | DAQB-143M3.4, INT3                                         |   |
| NOTUM    | Notum peptidylacetylesterase homolog (Drosophila)      | OK/SW-CL.30                                                |   |



|           |                                                         |                                                                                                  |   |
|-----------|---------------------------------------------------------|--------------------------------------------------------------------------------------------------|---|
| NOV       | Nephroblastoma overexpressed                            | CCN3, IBP-9, IGFBP-9, IGFBP9h, NOV                                                               |   |
| NOVA1     | Neuro-oncological ventral antigen 1                     | Nova-1                                                                                           |   |
| NOX1      | NADPH oxidase 1                                         | RP1-146H21.1, GP91-2, MOX1, NOH-1, NOH1                                                          |   |
| NOX4      | NADPH oxidase 4                                         | KOX, KOX-1, RENOX                                                                                |   |
| NOX5      | NADPH oxidase, EF-hand calcium binding domain 5         |                                                                                                  |   |
| NPAS3     | Neuronal PAS domain protein 3                           | MOP6, PASD6, bHLHe12                                                                             |   |
| NPAT      | Nuclear protein, ataxia-telangiectasia locus            | E14, E14/NPAT, p220                                                                              |   |
| NPC1      | Niemann-Pick disease, type C1                           | NPC                                                                                              |   |
| NPEPL1    | Aminopeptidase-like 1                                   | RP11-261P9.1, bA261P9.2                                                                          |   |
| NPEPPS    | Aminopeptidase puromycin sensitive                      | AAP-S, MP100, PSA                                                                                |   |
| NPFFR2    | Neuropeptide FF receptor 2                              | GPR74, HLWAR77, NPFF2, NPGPR                                                                     |   |
| NPIPL3    | Nuclear pore complex interacting protein 3              |                                                                                                  |   |
| NPM1      | Nucleophosmin (Nucleolar phosphoprotein P22, nucleolar) | B23, NPM                                                                                         | √ |
| NPR3      | Natriuretic peptide receptor 3                          | hCG_1781939, ANP-C, ANPK-C, ANPKC, C50H25, ZUCX02P-003, CTODP3, COTIDA, HS-40, MAKL, NRP3, RMD11 |   |
| NPRL3     | Nitrogen permease regulator-like 3 (N. communis)        |                                                                                                  |   |
| NPTN      | Neuroplastin                                            | GP55, GP65, SDFR1, SDR1, np55, np65                                                              |   |
| NPTXR     | Neuronal pentraxin receptor                             | NPR                                                                                              |   |
| NR_027144 |                                                         |                                                                                                  |   |
| NR1D2     | Nuclear receptor subfamily 1, group D,                  | BD73, EAR-1R, RVR                                                                                |   |
| NR1H4     | Nuclear receptor subfamily 1, group H,                  | BAR, FXR, HRR-1, HRR1, RIP14                                                                     |   |
| NR1I3     | Nuclear receptor subfamily 1, group I,                  | CAR, CAR1, MB67                                                                                  |   |
| NR2C2     | Nuclear receptor subfamily 2, group C,                  | TAK1, TR4                                                                                        |   |
| NR2E1     | Nuclear receptor subfamily 2, group E,                  | RP3-429G5.1, TLL, TLX, XTLL                                                                      |   |
| NR2F2     | Nuclear receptor subfamily 2, group F,                  | ANK1, CHFD4, COU1FB, COU1FH, NF-E3, NR2F1, SVD40, TEGOUR2                                        |   |
| NR3C1     | Nuclear receptor subfamily 3, group C,                  | GCCR, GCR, GCRST, GR, GRL                                                                        |   |
| NR3C2     | Nuclear receptor subfamily 3, group C,                  | MCR, MLR, MRVIT, NR3C2                                                                           |   |
| NR4A2     | Nuclear receptor subfamily 4, group A,                  | HZF-3, NOT, NURR1, RNR1, TINUR                                                                   |   |
| NR4A3     | Nuclear receptor subfamily 4, group A,                  | RP11-60I3.3, CHN, CSMF, MINOR, NOR1, TEC                                                         | √ |
| NR5A1     | Nuclear receptor subfamily 5, group A,                  | RP11-10TK10.1, AD4BF, ELI, FTZ1, FTZ1F, FOF1, SF-1, SF1, SRCF2, SRXV2                            |   |
| NR6A1     | Nuclear receptor subfamily 6, group A,                  | CT150, GCNF, GCNF1, NR61, RTR, hGCNF, hRTR                                                       |   |
| NRAS      | Neuroblastoma RAS viral (v-ras) oncogene homolog        | RP3-1000E10.2, ALT34, CIMNS, N-ras, NCM31, NS0, NRAS                                             | √ |
| NRCAM     | Neuronal cell adhesion molecule                         |                                                                                                  |   |
| NRF1      | Nuclear respiratory factor 1                            | ALPHA-PAL                                                                                        |   |

|        |                                                               |                                                                              |   |
|--------|---------------------------------------------------------------|------------------------------------------------------------------------------|---|
| NRG1   | Neuregulin 1                                                  | ANKA, GGF, GGF2, HGL, HRG, HRG1, HRGA, MST121, MSTB121, NDF, IT2, SMDF, NRG1 |   |
| NRGN   | Neurogranin (protein kinase C substrate, PKC)                 | RC3, hng                                                                     |   |
| NRIP1  | Nuclear receptor interacting protein 1                        | RIP140                                                                       |   |
| NRIP2  | Nuclear receptor interacting protein 2                        |                                                                              |   |
| NRIP3  | Nuclear receptor interacting protein 3                        | C11orf14, NY-SAR-105                                                         |   |
| NRK    | Nik related kinase                                            | RP1-82J11.1, NESK                                                            |   |
| NRP1   | Neuropilin 1                                                  | RP11-342D11.1, BDCA4, CD304, NP1, NRP, VEGFR3                                |   |
| NRSN1  | Neurensin 1                                                   | RP11-176J5.1, VMP, p24                                                       |   |
| NRSN2  | Neurensin 2                                                   | RP5-1103G7.8, C20orf98, dJ1103G7.6                                           |   |
| NRXN1  | Neurexin 1                                                    | Hs.22998, PTHSL2, SCZD17                                                     |   |
| NRXN3  | Neurexin 3                                                    | C14orf60                                                                     |   |
| NSD1   | Nuclear receptor binding SET domain protein 1                 | ARA267, KMT3B, SOTOS, SOTOS1, STO                                            | √ |
| NSF    | N-ethylmaleimide-sensitive factor                             | SKD2                                                                         |   |
| NSL1   | NSL1, MST2 kinetochore complex                                | DC8, C1orf48, MIS14                                                          |   |
| NSMAF  | Neuronal sphingomyelinase (NS-3) associated factor            | FAN                                                                          |   |
| NSUN3  | NOP2/Sun domain family, member 3                              | MSTP077, MST077                                                              |   |
| NSUN7  | NOP2/Sun domain family, member 7                              |                                                                              |   |
| NT5C1B | 5'-Nucleotidase, cytosolic IB                                 | FKSG85, AIRP, CN-IB, CN1B                                                    |   |
| NT5C2  | 5'-Nucleotidase, cytosolic II                                 | RP11-30H12.3, GMP, NT5B, PNT5, SFG43, SFG63, CN-II                           | √ |
| NT5DC1 | 5'-Nucleotidase domain containing 1                           | RP3-486I3.1, C6orf200, LP2642, NT5C2L1                                       |   |
| NT5DC3 | 5'-Nucleotidase domain containing 3                           | TU12B1-TY, TU12B1TY                                                          |   |
| NT5E   | 5'-Nucleotidase, ecto (CD73)                                  | RP11-321N4.1, CAL3A, CD73, ESN1, NT, NT5, NTE, NNT                           |   |
| NTM    | Neurotrimin                                                   | UNQ297/PRO337, HNT, IGLON2, NTRI                                             |   |
| NTNG1  | Netrin G1                                                     | UNQ571/PRO1133, Lmnt1                                                        |   |
| NTRK2  | Neurotrophic tyrosine kinase, receptor, type 2                | RP11-263K15.1, GP145-TrkB, TRKB, trk-B                                       |   |
| NTS    | Neurotensin                                                   | NMN-125, NN, NT, NT/N1, NTS                                                  |   |
| NTSR1  | Neurotensin receptor 1 (high affinity)                        | NTR                                                                          |   |
| NUAK2  | NUAK family, SNF1-like kinase, 2                              | SNARK                                                                        |   |
| NUB1   | Negative regulator of ubiquitin-like proteins 1               | BS4L, NYREN18, NUB1                                                          |   |
| NUBP1  | Nucleotide binding protein 1                                  | NBP, NBP1, NBP35                                                             |   |
| NUBPL  | Nucleotide binding protein-like                               | C14orf127, IND1, huInd1                                                      |   |
| NUCB2  | Nucleobindin 2                                                | HEL-S-109, NEF                                                               |   |
| NUCKS1 | Nuclear casein kinase and cyclin-dependent kinase substrate 1 | JC7, NUCKS                                                                   |   |

|          |                                                              |                                                                       |   |
|----------|--------------------------------------------------------------|-----------------------------------------------------------------------|---|
| NUDCD3   | NudC domain containing 3                                     | hCG_18301, NudCL                                                      |   |
| NUDT10   | Nucleoside diphosphate kinase 10                             | RP11-348F1.4, APS2, DIPP3a, hDIPP3alpha                               |   |
| NUDT12   | Nucleoside triphosphate kinase 12                            |                                                                       |   |
| NUDT13   | Nucleoside triphosphate kinase 13                            | RP11-152N13.13-004                                                    |   |
| NUDT16   | Nucleoside triphosphate kinase 16                            |                                                                       |   |
| NUDT16L1 | Nucleoside triphosphate kinase 16L1                          | SDOS                                                                  |   |
| NUDT16P1 | Nucleoside triphosphate kinase 16P1                          | NUDT16P                                                               |   |
| NUDT18   | Nucleoside triphosphate kinase 18                            | MTH3                                                                  |   |
| NUDT19   | Nucleoside triphosphate kinase 19                            | RP2                                                                   |   |
| NUDT21   | Nucleoside triphosphate kinase 21                            | CFIM25, CPSF5                                                         |   |
| NUDT4    | Nucleoside triphosphate kinase 4                             | HDCMB47P, DIPP2, DIPP2alpha, DIPP2beta                                |   |
| NUDT4P1  | Nucleoside triphosphate kinase 4P1                           |                                                                       |   |
| NUFIP1   | Nuclear fragile X mental retardation protein 1               | NUFIP, bA540M5.1                                                      |   |
| NUFIP2   | Nuclear fragile X mental retardation protein 2               | PIG1, 182-FIP, 82-FIP, FIP-82                                         |   |
| NUP153   | Nucleoporin 153 kDa                                          | HNUP153, N153                                                         |   |
| NUP160   | Nucleoporin 160 kDa                                          |                                                                       |   |
| NUP50    | Nucleoporin 50 kDa                                           | CTA-268H5.7, NPAP60, NPAP60L                                          |   |
| NUP98    | Nucleoporin 98 kDa                                           | ADIR2, NUP196, NUP96                                                  | v |
| NUPL2    | Nucleoporin like 2                                           | CG1, NLP-1, NLP_1, hCG1                                               |   |
| NUS1     | Nuclear unaccaprenyl pyrophosphate kinase 1                  | C6orf68, MGC:7199, NgBR, TANGO14                                      |   |
| NWD1     | Nuclear pore complex domain containing 1                     | A230063L24Rik                                                         |   |
| NXF4     | Nuclear RNA export factor 4 pseudogene                       |                                                                       |   |
| NXPH1    | Neurexophilin 1                                              | Nbla00697, NPH1                                                       |   |
| NXPH2    | Neurexophilin 2                                              | NPH2                                                                  |   |
| NXT2     | Nuclear transport factor 2-like export factor 2              | RP4-596C15.2, P15-2                                                   |   |
| OAS2     | 2'-5'-Oligoadenylate synthetase 2, 69/71 kDa                 |                                                                       |   |
| OAT      | Ornithine aminotransferase                                   | GACR, HOGAASE, OKT, OAT                                               |   |
| OAZ1     | Ornithine decarboxylase antizyme 1                           | AZI, OAZ                                                              |   |
| OBFC1    | Oligonucleotide/oligosaccharide-binding factor 1             | RP11-341N10.2, AAF144, AAF144, NFA-52, STN1, LA541N10.2               |   |
| OBFC2A   | Oligonucleotide/oligosaccharide-binding factor 2A            | EGK_04635                                                             |   |
| OBSCN    | Obscure, cytoskeletal component and tumor suppressor protein | RP5-1139B12.1, ARHGEF30, UNC89                                        |   |
| OCA2     | Oculocutaneous albinism II                                   | BET, BET1, BET2, BOCA, DTST2, ETCL, ETCL2, EXCL2, HCL2, P. BED, SHER1 |   |
| OCIAD1   | OCIA domain containing 1                                     | ASRIJ, OCIA, TPA018                                                   |   |

|         |                                                                                     |                                                            |  |
|---------|-------------------------------------------------------------------------------------|------------------------------------------------------------|--|
| ODC1    | Ornithine decarboxylase 1                                                           | ODC                                                        |  |
| ODF2L   | Outer dense fiber of sperm tails 2-like                                             | RP5-977L11.1, dJ977L11.1                                   |  |
| ODZ1    | Odz, odd Oz/ten-m homolog 1 (Drosophila)                                            | BOS_25167                                                  |  |
| ODZ3    | Odz (odd Oz/ten-m, Drosophila) homolog 3                                            |                                                            |  |
| ODZ4    | Odz, odd Oz/ten-m homolog 4 (Drosophila)                                            | BOS_24429                                                  |  |
| OGFRL1  | Opioid growth factor receptor-like 1                                                | dJ331H24.1                                                 |  |
| OGN     | Osteoglycin                                                                         | OG, OIF, SLRR3A                                            |  |
| OGT     | O-linked N-acetylglucosamine (O-GlcNAc) transferase                                 | HRNT1, O-GLCNAC                                            |  |
| OIT3    | oncprotein induced transcript 3                                                     | UNQ826/PRO1753, LZP                                        |  |
| OLFM1   | Olfactomedin 1                                                                      | RP11-399H11.1, AMY, NOE1, NOELIN1, OlfA                    |  |
| OLFM3   | Olfactomedin 3                                                                      | RP11-556K13.2, NOE3, NOELIN3, OPTIMEDIN                    |  |
| OLFML2A | Olfactomedin-like 2A                                                                | RP11-175D17.4, PRO34319                                    |  |
| OMA1    | OMA1 zinc metallopeptidase                                                          | Z010001009KIK, DADB1, MIPK1-1, TIKK087C, ZMPOMA1-peptidase |  |
| ONECUT2 | One cut homeobox 2                                                                  | OC-2, OC2                                                  |  |
| OPA3    | Optic atrophy 3 (autosomal recessive, with cone and rod photoreceptor degeneration) | MGA3                                                       |  |
| OPHN1   | Oligophrenin 1                                                                      | RP6-201G10.1, ARHGAP41, MRX60, OPN1                        |  |
| OPN5    | Opsin 5                                                                             | GPR136, GRP136, PGR12, TMEM13                              |  |
| OPRK1   | Opioid receptor, kappa 1                                                            | K-OR-1, KOR, KOR-1, OPRK                                   |  |
| OPRM1   | Opioid receptor, mu 1                                                               | LMOR, M-OR-1, MOP, MOR, MOR1, OPRM                         |  |
| OR12D3  | Olfactory receptor, family 12, subfamily D,                                         | DADB-136A24.10-001, hs6M1-27                               |  |
| OR1J2   | Olfactory receptor, family 1, subfamily J,                                          | RP11-342K25.4, HG152, HSA3, OK155, OK155, OK9-             |  |
| OR51E1  | Olfactory receptor, family 51, subfamily E,                                         | 1A-OR51E1, 1B-OR51E1, OR150, OR104F, OR52A5F,              |  |
| OR51E2  | Olfactory receptor, family 51, subfamily E,                                         | BOCB, PSGR2, OR51E1                                        |  |
| OR6W1P  | Olfactory receptor, family 6, subfamily w,                                          | hCG_2044604, OR51E3P, OR52A2, PSGR                         |  |
| OR7E91P | Olfactory receptor, family 7, subfamily E,                                          |                                                            |  |
| ORAI2   | ORAI calcium release-activated calcium modulator 2                                  | PP1729, C7orf19, CBCIP2, MEM142B, TMEM142B                 |  |
| ORAOV1  | Oral cancer overexpressed 1                                                         | TAOS                                                       |  |
| ORC1L   | Origin recognition complex, subunit 1                                               | BOS_3528ORC1L                                              |  |
| ORC3L   | Origin recognition complex, subunit 3                                               | RP3-486L4.1, LAT, LATHEOL, ORC3                            |  |
| ORC4L   | Origin recognition complex, subunit 4                                               | ORC4LP, ORC4                                               |  |
| ORMDL1  | ORMDL sphingolipid biosynthesis regulator 1                                         | HSPC202                                                    |  |
| ORMDL3  | ORMDL sphingolipid biosynthesis regulator 3                                         |                                                            |  |
| OSBP2   | Oxysterol binding protein 2                                                         | RP3-430N8.7, HLM, ORP-4, ORP4, OSBPL1, OSBPL4              |  |

|           |                                                           |                                     |  |
|-----------|-----------------------------------------------------------|-------------------------------------|--|
| OSBPL10   | Oxysterol binding protein-like 10                         | ORP10, OSBP9                        |  |
| OSBPL11   | Oxysterol binding protein-like 11                         | ORP-11, ORP11, OSBP12, TCCCIA00292  |  |
| OSBPL1A   | Oxysterol binding protein-like 1A                         | ORP-1, ORP1, OSBPL1B                |  |
| OSBPL2    | Oxysterol binding protein-like 2                          | RP11-157P1.2, ORP-2, ORP2           |  |
| OSBPL3    | Oxysterol binding protein-like 3                          | ORP-3, ORP3, OSBP3                  |  |
| OSBPL6    | Oxysterol binding protein-like 6                          | ORP6                                |  |
| OSBPL8    | Oxysterol binding protein-like 8                          | MST120, MSTP120, ORP8, OSBP10       |  |
| OSGIN2    | Oxidative stress induced growth inhibitor family member 2 | C8orf1, hT41                        |  |
| OSTF1     | Osteoclast stimulating factor 1                           | OSF, SH3P2, bA235O14.1              |  |
| OSTM1     | Osteoporosis associated transmembrane protein 1           | HSPC019, GIPN, GL, OPTB5            |  |
| OTUB2     | OTU deubiquitinase, ubiquitin adenylation 2               | C14orf137, OTB2, OTU2               |  |
| OTUD1     | OTU deubiquitinase 1                                      | DUBA7, OTDC1                        |  |
| OTUD3     | OTU deubiquitinase 3                                      | RP11-460G22.1, DUB                  |  |
| OTUD4     | OTU deubiquitinase 4                                      | DUBA6, HIN1, HSHIN1                 |  |
| OTUD6B    | OTU domain containing 6B                                  | CGI-77, DUBA-5, DUBA5               |  |
| OTUD7A    | OTU deubiquitinase 7A                                     | C15orf16, C16ORF15, CEZANNE2, OTUD7 |  |
| OTX2OS1   | Orthodenticle homolog 2 opposite strand 1                 | RP23-131O4.2                        |  |
| OVOS      | Ovostatin                                                 |                                     |  |
| OXCT1     | 3-Oxoacid CoA transferase 1                               | OXCT, SCOT                          |  |
| OXGR1     | Oxoglutarate (alpha-ketoglutarate) receptor 1             | GPR80, GPR99, P2RY15, P2Y15, aKGR   |  |
| OXNAD1    | Oxidoreductase NAD-binding domain containing 1            |                                     |  |
| OXNAD1    | Oxidoreductase NAD-binding domain containing 1            |                                     |  |
| P2RX7     | Purinergic receptor P2X, ligand-gated ion channel 7       | P2X7                                |  |
| P4HA2     | Prolyl 4-hydroxylase, alpha polypeptide II                | UNQ290/PRO330                       |  |
| P4HA3     | Prolyl 4-hydroxylase, alpha polypeptide III               | UNQ711/PRO1374                      |  |
| PAAF1     | Proteasomal ATPase-associated factor 1                    | PAAF, Rpn14, WDR71                  |  |
| PABPC1    | Poly(A) binding protein, cytoplasmic 1                    | PAB1, PABP, PABP1, PABPC2, PABPL1   |  |
| PABPC1L2B | Poly(A) binding protein, cytoplasmic 1-like 2B            | RP11-493K23.2, RBM32B               |  |
| PABPC1P2  | Poly(A) binding protein, cytoplasmic 1 pseudogene         |                                     |  |
| PABPC4L   | Poly(A) binding protein, cytoplasmic 4-like               | hCG_1647909                         |  |
| PABPC5    | Poly(A) binding protein, cytoplasmic 5                    | 5                                   |  |
| PACRGL    | PARK2 co-regulated-like                                   | C4orf28                             |  |
| PACS2     | Phosphofurin acidic cluster sorting protein 2             | PACS-2, PACS1L                      |  |

|             |                                                                                   |                                                                 |   |
|-------------|-----------------------------------------------------------------------------------|-----------------------------------------------------------------|---|
| PADI1       | Peptidyl arginine deiminase, type I                                               | HPAD10, PAD1, PDI, PDI1                                         |   |
| PAFAH1B1    | platelet-activating factor acetylhydrolase 1b, class B                            | LIS1, LIS2, MDCR, MDS, PAFAH                                    |   |
| PAFAH1B2    | platelet-activating factor acetylhydrolase 1b, class B                            | HEL-S-303                                                       | v |
| PAFAH2      | platelet-activating factor acetylhydrolase 2, class B                             | RP11-111D20.1, HSD-PLA2                                         |   |
| PAG1        | phosphoprotein membrane anchor with phosphatidylinositol 4-kinase type I activity | CBP, PAG                                                        |   |
| PAH         | Phenylalanine hydroxylase                                                         | PH, PKU, PKU1                                                   |   |
| PAK2        | P21 protein (Cdc42/Rac)-activated kinase 2                                        | PAK65, PAKgam                                                   |   |
| PAK4        | P21 protein (Cdc42/Rac)-activated kinase 4                                        |                                                                 |   |
| PAK6        | P21 protein (Cdc42/Rac)-activated kinase 6                                        | PAK5                                                            |   |
| PAK7        | P21 protein (Cdc42/Rac)-activated kinase 7                                        | RP5-1119D9.3, PAK5                                              |   |
| PALLD       | Palladin, cytoskeletal associated protein                                         | CGI-151, CGI151, MYN, PNCA1, SIH002                             |   |
| PALM2       | Paralemmin 2                                                                      | AKAP2                                                           |   |
| PALM2-AKAP2 | PALM2-AKAP2 readthrough                                                           | hCG_28765, AKAP2                                                |   |
| PAM         | peptidylglycine alpha-amidating monooxygenase                                     |                                                                 |   |
| PAN3        | Pan3p                                                                             | YKL025CECM35                                                    |   |
| PANK1       | Pantothenate kinase 1                                                             | PANK                                                            |   |
| PANK2       | Pantothenate kinase 2                                                             | RP4-681N20.1, C20orf48, HARP, HSS, NBIA1, PKAN                  |   |
| PANK3       | Pantothenate kinase 3                                                             |                                                                 |   |
| PANK4       | Pantothenate kinase 4                                                             | RP3-395M20.4                                                    |   |
| PANX1       | Pannexin 1                                                                        | px1                                                             |   |
| PAPD4       | PAP associated domain containing 4                                                | GLD2, TUT2                                                      |   |
| PAPD5       | PAP associated domain containing 5                                                | TRF4-2                                                          |   |
| PAPD7       | PAP associated domain containing 7                                                | LAK-1, LAK1, POLK, POLS, TRF4, TRF4-1, TRF41, TUTASE5           |   |
| PAPLN       | rapam, proteoglycan-like sulfated glycoprotein                                    | UNQ2420/PRO4977                                                 |   |
| PAPOLA      | Poly(A) polymerase alpha                                                          | PAP                                                             |   |
| PAPOLB      | Poly(A) polymerase beta (testis specific)                                         | PAPT, TPAP                                                      |   |
| PAPOLG      | Poly(A) polymerase gamma                                                          |                                                                 |   |
| PAPPA       | pregnancy-associated plasma protein A, subunit 1                                  | RP11-45A10.1, ASDAD12, DIFLAI, IGFBP-4ase, PAPA, PAPP-A1, PAPPB |   |
| PAPPA2      | Pappalysin 2                                                                      | RP4-774I24.1, PAPP-A2, PAPP-E, PAPPB, PLAC3                     |   |
| PAQR5       | progesterin and adipoQ receptor family member V                                   | MPRG                                                            |   |
| PAQR9       | progesterin and adipoQ receptor family member IX                                  |                                                                 |   |
| PAR1        |                                                                                   |                                                                 |   |
| PARD6B      | Par-6 family cell polarity regulator beta                                         | PAR6B                                                           |   |

|        |                                                                    |                                                                           |   |
|--------|--------------------------------------------------------------------|---------------------------------------------------------------------------|---|
| PARD6G | Par-6 family cell polarity regulator gamma                         |                                                                           |   |
| PARG   | Poly (ADP-ribose) glycohydrolase                                   | RP11-507K13.299, PARG                                                     |   |
| PARK2  | Parkin RBR E3 ubiquitin protein ligase                             | KB-152G3.1, AR-JP, LPRS2, PDJ, PRKN                                       |   |
| PARM1  | Prostate androgen-regulated mucin-like protein 1                   | UNQ1879/TKO4322, Cipart1, DNFZ150+00823, FANM-1, WSC4                     |   |
| PARN   | Poly(A)-specific ribonuclease                                      | DAN                                                                       |   |
| PARP1  | Poly (ADP-ribose) polymerase 1                                     | RP11-125A13.2, ADPRT, ADPRT1, ADPRT11, ARTD1, PAPP, PAPP-1, PPO1, ADPRT-1 |   |
| PARP11 | Poly (ADP-ribose) polymerase family, member 11                     | ARTD11, C12orf6, MIB006                                                   |   |
| PARP14 | Poly (ADP-ribose) polymerase family, member 14                     | ARTD8, BAL2, PARP-14, pART8                                               |   |
| PARP2  | Poly (ADP-ribose) polymerase 2                                     | ARTD2, Adprt2, Adprt12, Aspart12, C78626, PARP-2                          |   |
| PARP9  | Poly (ADP-ribose) polymerase family, member 9                      | ARTD9, BAL, BAL1, MGC:7868                                                |   |
| PARVA  | Parvin, alpha                                                      | CH-ILKBP, MXRA2                                                           |   |
| PATE3  | Prostate and testis expressed 3                                    | hCG_2036778, HEL-127, PATE-DJ                                             |   |
| PATE4  | Prostate and testis expressed 4                                    | PATE-B                                                                    |   |
| PATL1  | Protein associated with topoisomerase II                           | OK/KNS-cl.5, Pat1b, hPat1b                                                |   |
| PATZ1  | POZ (BTB) and TAZ1 hook containing zinc finger 1                   | MAZK, PATZ, KIAZ, ZBTB19, ZNF278, ZSO, JH00N02                            |   |
| PAWR   | PRKC, apoptosis, WT1, regulator                                    | PAR4, Par-4                                                               |   |
| PAX3   | Paired box 3                                                       | CDHS, HUP2, WS1, WS3                                                      | √ |
| PAX5   | Paired box 5                                                       | ALL3, BSAP                                                                | √ |
| PAX6   | Paired box 6                                                       | AN, AN2, D11S812E, FVH1, MGDA, WAGR                                       |   |
| PAX7   | Paired box 7                                                       | HUP1B, RMS2, PAX7                                                         | √ |
| PAX9   | Paired box 9                                                       | STHAG3                                                                    |   |
| PAXIP1 | PAX interacting (with transcription-activating domain) protein 1   | CAGF28, CAGF29, PACIP1L, PTIP, TNRC2, PAXIP1                              |   |
| PBK    | PDZ binding kinase                                                 | CT84, HEL164, Nori-3, SPK, TOPK                                           |   |
| PBLD   | Pteridine biosynthesis-like protein domain containing              | MAWBP, MAWDBP                                                             |   |
| PBRM1  | Polybromo 1                                                        | BAF180, PB1                                                               | √ |
| PBX1   | Pre-B-cell leukemia homeobox 1                                     |                                                                           | √ |
| PBX2   | Pre-B-cell leukemia homeobox 2                                     | DAAP-218M18.5, G17, HOX12MHC, PBX2                                        |   |
| PBX3   | Pre-B-cell leukemia homeobox 3                                     | RP11-336P12.1                                                             |   |
| PCA3   | Prostate cancer associated 3 (non-protein coding)                  | DD3, NCRNA00019, PCAT3                                                    |   |
| PCBD2  | Protein 4 alpha-carbomorphine dehydratase/dimerization cofactor of | DCOH2, DCOHM, PHS2                                                        |   |
| PCBP1  | Poly(rC) binding protein 1                                         | HEL-S-85, HNRPE1, HNRPX, hnRNP-E1, hnRNP-X                                |   |
| PCBP2  | Poly(rC) binding protein 2                                         | HNRNPE2, HNRPE2, hnRNP-E2                                                 |   |
| PCCA   | Propionyl CoA carboxylase, alpha subunit                           |                                                                           |   |

|          |                                                   |                                                        |  |
|----------|---------------------------------------------------|--------------------------------------------------------|--|
| PCCB     | Propionyl CoA carboxylase, beta subunit           |                                                        |  |
| PCDH11X  | Protocadherin 11 X-linked                         | RP11-138F13.1, PCDH11X, PCDH11, PCDH1A, PCDH1B, PCDH1C |  |
| PCDH11Y  | Protocadherin 11 Y-linked                         | PCDH-PC, PCDH22, PCDHX, PCDHY                          |  |
| PCDH15   | Protocadherin-related 15                          | RP11-449J3.2, CDHR15, DFNB23, USH1F                    |  |
| PCDH17   | Protocadherin 17                                  | PCDH68, PCH68                                          |  |
| PCDH19   | Protocadherin 19                                  | RP11-99E24.1, EFMR, EIEE9                              |  |
| PCDH20   | Protocadherin 20                                  | PCDH13                                                 |  |
| PCDH7    | Protocadherin 7                                   | BH-Pcdh, BHPCDH, PPP1R120                              |  |
| PCDHA1   | Protocadherin alpha 1                             | PCDH-ALPHA1                                            |  |
| PCDHA10  | Protocadherin alpha 10                            | CNR8, CNRN8, CNRS8, CRNR8, PCDH-ALPHA10                |  |
| PCDHA11  | Protocadherin alpha 11                            | CNR7, CNRN7, CNRS7, CRNR7, PCDH-ALPHA11                |  |
| PCDHA12  | Protocadherin alpha 12                            | PCDH-ALPHA12                                           |  |
| PCDHA13  | Protocadherin alpha 13                            | CNR5, CNRN5, CNRS5, CRNR5, PCDH-ALPHA13                |  |
| PCDHA2   | Protocadherin alpha 2                             | PCDH-ALPHA2                                            |  |
| PCDHA3   | Protocadherin alpha 3                             | PCDH-ALPHA3                                            |  |
| PCDHA4   | Protocadherin alpha 4                             | CNR1, CNRN1, CRNR1, PCDH-ALPHA4                        |  |
| PCDHA5   | Protocadherin alpha 5                             | CNR6, CNRN6, CNRS6, CRNR6, PCDH-ALPHA5                 |  |
| PCDHA6   | Protocadherin alpha 6                             | CNR2, CNRN2, CNRS2, CRNR2, PCDH-ALPHA6                 |  |
| PCDHA7   | Protocadherin alpha 7                             | CNR4, CNRN4, CNRS4, CRNR4, PCDH-ALPHA7                 |  |
| PCDHA8   | Protocadherin alpha 8                             | PCDH-ALPHA8                                            |  |
| PCDHA9   | Protocadherin alpha 9                             | PCDH-ALPHA9                                            |  |
| PCDHAC1  | Protocadherin alpha subfamily C, 1                | PCDH-ALPHA-C1                                          |  |
| PCDHAC2  | Protocadherin alpha subfamily C, 2                | PCDH-ALPHA-C2                                          |  |
| PCDHB19P | Protocadherin beta 19 pseudogene                  | PCDHB19; PCDH-PSI5                                     |  |
| PCDHB3   | Protocadherin beta 3                              | PCDH-BETA3                                             |  |
| PCDHB4   | Protocadherin beta 4                              | PCDH-BETA4                                             |  |
| PCDHB6   | Protocadherin beta 6                              | PCDH-BETA6                                             |  |
| PCDHB7   | Protocadherin beta 7                              | PCDH-BETA7                                             |  |
| PCF11    | PCF11 cleavage and polyadenylation factor subunit |                                                        |  |
| PCGF2    | Polycomb group ring finger 2                      | MEL-18, RNF110, ZNF144                                 |  |
| PCGF3    | Polycomb group ring finger 3                      | DONG1, RNF3, RNF3A                                     |  |
| PCGF5    | Polycomb group ring finger 5                      | RNF159                                                 |  |
| PCGF6    | Polycomb group ring finger 6                      | MBLR, RNF134                                           |  |



|         |                                                               |                                                    |   |
|---------|---------------------------------------------------------------|----------------------------------------------------|---|
| PCID2   | PCI domain containing 2                                       | RP11-98F14.6, F10                                  |   |
| PCLO    | Piccolo presynaptic cytomatrix protein                        | tcag7.1085, ACZ                                    |   |
| PCNA    | Proliferating cell nuclear antigen                            | ATLD2                                              |   |
| PCNP    | PCNP1 proteolytic signal containing nuclear protein           | Ab2-416                                            |   |
| PCNT    | Pericentrin                                                   | KEN, MOPD2, PCN2, PCNTB, PCTN2, SCKL4, PCNT        |   |
| PCNX    | Pecanex homolog (Drosophila)                                  | PCNXL1, pecanex                                    |   |
| PCSK1   | Proprotein convertase subtilisin/kexin type 1                 | BMIQ12, NEC1, PC1, PC3, SPC3                       |   |
| PCSK2   | Proprotein convertase subtilisin/kexin type 2                 | NEC 2, NEC-2, NEC2, PC2, SPC2                      |   |
| PCSK5   | Proprotein convertase subtilisin/kexin type 5                 | RP11-422N19.4, PC5, PC6, PC6A, SPC6                |   |
| PCSK6   | Proprotein convertase subtilisin/kexin type 6                 | PACE4, SPC4                                        |   |
| PCSK9   | Proprotein convertase subtilisin/kexin type 9                 | PSEC0052, PHS, PCHOLAS, EDLCQ1, NARC-1, NARGL, PC9 |   |
| PCYOX1  | Prenylcysteine oxidase 1                                      | UNQ597/PRO1183, PCL1                               |   |
| PCYT1B  | Phosphatase cytidylyltransferase 1, chromo, beta              | CCTB, CTB                                          |   |
| PDAP1   | PDGFA associated protein 1                                    | HASPP28, PAP, PAP1                                 |   |
| PDCD10  | Programmed cell death 10                                      | CCM3, TFAR15                                       |   |
| PDCD2   | Programmed cell death 2                                       | RP1-191N21.2, RP8, ZMYND7                          |   |
| PDCD4   | Programmed cell death 4 (neoplastic transformation inhibitor) | RP11-348N5.4, H731                                 |   |
| PDCD6   | Programmed cell death 6                                       | ALG-2, PEF1B                                       |   |
| PDCD6IP | Programmed cell death 6 interacting protein                   | AIP1, ALIX, DRIP4, HP95                            |   |
| PDCL    | Phosducin-like                                                | RP11-465F21.2, PhLP                                |   |
| PDE10A  | Phosphodiesterase 10A                                         | HSPDE10A                                           |   |
| PDE11A  | Phosphodiesterase 11A                                         | PPNAD2                                             |   |
| PDE12   | Phosphodiesterase 12                                          | 2'-PDE                                             |   |
| PDE1B   | Phosphodiesterase 1B, cAMP-dependent                          | PDE1B1, PDES1B                                     |   |
| PDE2A   | Phosphodiesterase 2A, cGMP-stimulated                         | CGS-PDE1, PED2A4, cGSPDE, PDE2A                    |   |
| PDE3B   | Phosphodiesterase 3B, cGMP-inhibited                          | HcGIP1, cGIPDE1                                    |   |
| PDE4B   | Phosphodiesterase 4B, cAMP-specific                           | RP5-876C12.1, DPDE4, PDEIVB                        |   |
| PDE4DIP | Phosphodiesterase 4D interacting protein                      | RP4-791M13.2, CMYA2, MMGL                          | v |
| PDE5A   | Phosphodiesterase 5A, cGMP-specific                           | CGB-PDE, CN5A, PDE5                                |   |
| PDE6D   | Phosphodiesterase 6D, cGMP-specific, rod, beta                | JBTS22, PDED                                       |   |
| PDE7A   | Phosphodiesterase 7A                                          | RP11-707M3.3, HCP1, PDE7                           |   |
| PDE7B   | phosphodiesterase 7B                                          | RP11-472E5.2, bA472E5.1                            |   |
| PDGFA   | Platelet-derived growth factor alpha polypeptide              | PDGF-A, PDGF1                                      |   |

|        |                                                       |                                                                 |   |
|--------|-------------------------------------------------------|-----------------------------------------------------------------|---|
| PDGFC  | Platelet derived growth factor C                      | UNQ174/PRO200, FALLOTEIN, SCDGF                                 |   |
| PDGFD  | Platelet derived growth factor D                      | MSTP036, IEGF, SCDGF-B, SCDGFB                                  |   |
| PDGFRA | Platelet-derived growth factor receptor, alpha        | CD140A, PDGFR-2, PDGFR2, RHEPDGFRA                              | √ |
| PDGFRB | Platelet-derived growth factor receptor, beta         | CD140B, IBGC4, IGF1, JTK12, PDGFR, PDGFR-1, PDGFR1              | √ |
| PDHA1  | Pyruvate dehydrogenase (lipoamide) alpha 1            | RP11-723P2.1, PDHA, PDHCE1A, PHE1A                              |   |
| PDHA2  | Pyruvate dehydrogenase (lipoamide) alpha 2            | hCG_1643458, PDHAL                                              |   |
| PDHX   | Pyruvate dehydrogenase complex, protein subunit X     | DLDBP, E3BP, OPDX, PDX1, proX                                   |   |
| PDIA5  | Protein disulfide isomerase family A, member 5        | PDIR                                                            |   |
| PDIA6  | Protein disulfide isomerase family A, member 6        | ERP5, P5, TXNDC7                                                |   |
| PDIK1L | PDLIM1 interacting kinase 1 like                      | RP11-96L14.4, CLIK1L, STK35L2                                   |   |
| PDK1   | Pyruvate dehydrogenase kinase, isozyme 1              |                                                                 |   |
| PDK4   | Pyruvate dehydrogenase kinase, isozyme 4              |                                                                 |   |
| PDLIM2 | PDZ and LIM domain 2 (mystique)                       | PP6345, MYSTIQUE, SLIM                                          |   |
| PDLIM5 | PDZ and LIM domain 5                                  | L9, ENH, ENH1, LIM                                              |   |
| PDP1   | Pyruvate dehydrogenase phosphatase catalytic subunit  | PDH, PDP, PDPC, PPM2C                                           |   |
| PDPK1  | 5-phosphoinositide dependent protein kinase           | PDK1, PDPK2, PRO0461                                            |   |
| PDS5A  | PDS5, regulator of cohesion maintenance, protein 5A   | PIG54, SCC-112, SCC112                                          |   |
| PDS5B  | PDS5, regulator of cohesion maintenance, protein 5B   | RP1-267P19.1, APRIN, AS3, CG008                                 |   |
| PDSS2  | Prenyl (decarboxyl) diphosphate synthase, cytosolic   | RP11-5919.3, C00H210, C0Q10D5, DLPT, DCA3919.3, PDSS1           |   |
| PDXDC1 | Pyridoxal-dependent decarboxylase domain containing 1 | LP8165                                                          |   |
| PDXK   | Pyridoxal (pyridoxine, vitamin B6) kinase             | PRED79, C21orf124, C21orf97, HEL-S-1a, PKH, PNK                 |   |
| PDZD11 | PDZ domain containing 11                              | RP13-26D14.3, AIPP1, PDZK11, PISP                               |   |
| PDZRN3 | PDZ domain containing ring finger 3                   | LNK3, SEMACAP3                                                  |   |
| PEBP1  | Phosphatidylethanolamine binding protein 1            | HCNT, HCNT pp, HEL-210, HEL-S-34, FDI, FEDI, PEPB, PEPB1, PEPB2 |   |
| PEF1   | Penta-EF-hand domain containing 1                     | UNQ1845/PRO3573, ABP32A, PEF1                                   |   |
| PEG10  | Paternally expressed 10                               | EDR, HB-1, MEF3L, Mar2, Mart2, RGAG3                            |   |
| PEG3   | Paternally expressed 3                                | hCG_1685807, PW1, ZKSCAN22, ZNF904, ZSCAN24                     |   |
| PELI1  | Pellino E3 ubiquitin protein ligase 1                 |                                                                 |   |
| PELI3  | Pellino E3 ubiquitin protein ligase family member 3   |                                                                 |   |
| PER2   | Period circadian clock 2                              | FASPS, FASPS1                                                   |   |
| PER3   | Period circadian clock 3                              | RP3-467L1.3, GIG13                                              |   |
| PER4   | Period circadian clock 3 pseudogene                   |                                                                 |   |
| PERP   | PERP, TP53 apoptosis effector                         | RP3-470H19.1, KCF1, KNTCAP1, POFCT, THW, H146G110.1             |   |

|         |                                               |                                                                                                   |  |
|---------|-----------------------------------------------|---------------------------------------------------------------------------------------------------|--|
| PEX1    | Peroxisomal biogenesis factor 1               | tcag7.1018, PBD1A, PBD1B, ZWS, ZWS1                                                               |  |
| PEX11A  | Peroxisomal biogenesis factor 11 alpha        | PEX11-ALPHA, PMP28, hsPEX11p                                                                      |  |
| PEX13   | Peroxisomal biogenesis factor 13              | NALD, PBD11A, PBD11B, ZWS                                                                         |  |
| PEX19   | Peroxisomal biogenesis factor 19              | ON3W-C1.ZZ, DTSZZZ3E, HIK33, PBD12A, PMP11, PMP11, PVEJA, PVEJB, PMP13, PMP13, PMP13, PMP13, ZWS2 |  |
| PEX2    | Peroxisomal biogenesis factor 2               |                                                                                                   |  |
| PEX3    | Peroxisomal biogenesis factor 3               | RP1-20N2.3, PBD10A, TRG18                                                                         |  |
| PEX5    | Peroxisomal biogenesis factor 5               | PBD2A, PBD2B, PTS1-BP, PTS1R, PXR1                                                                |  |
| PEX5L   | Peroxisomal biogenesis factor 5-like          | PEX5R, PEX5RP, PXR2, PXR2B, TRIP8b                                                                |  |
| PEX7    | Peroxisomal biogenesis factor 7               | RP11-55K22.6, PBD9B, PTS2R, RCDP1, RD                                                             |  |
| PF4V1   | Platelet factor 4 variant 1                   | CXCL4L1, CXCL4V1, PF4-ALT, PF4A, SCYB4V1                                                          |  |
| PFAS    | Phosphatidylinositol myo-inositol             | FGAMS, FGAR-AT, FGARAT, PURL                                                                      |  |
| PFKFB2  | Phosphofructokinase/fructose-bisphosphatase 2 | RP11-164O23.2, PFK-2/FBPase-2                                                                     |  |
| PFKFB3  | Phosphofructokinase/fructose-bisphosphatase 3 | RP11-298K24.3, IPFK2, PFK2                                                                        |  |
| PFKFB4  | Phosphofructokinase/fructose-bisphosphatase 4 |                                                                                                   |  |
| PGAM1   | Phosphoglycerate mutase 1 (brain)             | RP11-452K12.8, HEL-S-35, PGAM-B, PGAMA                                                            |  |
| PGAM4   | Phosphoglycerate mutase family member 4       | PGAM-B, PGAM1, PGAM3, dJ1000K24.1                                                                 |  |
| PGAP1   | Post-GPI attachment to proteins 1             | UNQ3024/PRO9822, Bst1, ISPD3024, MRT42, SPG67                                                     |  |
| PGAP3   | Post-GPI attachment to proteins 3             | UNQ340/PRO1100, AGLA340, CABZ, PFKLDT, PBL408, LGS16                                              |  |
| PGBD1   | PiggyBac transposable element derived 1       | hucep-4, HUCEP-4, SCAND4, dJ874C20.4                                                              |  |
| PGM2    | Phosphoglucomutase 2                          | MSTP006                                                                                           |  |
| PGM2L1  | Phosphoglucomutase 2-like 1                   | BM32A                                                                                             |  |
| PGPEP1  | Pyroglutamyl-peptidase I                      | PAP-I, PGP, PGP-I, PGPI, Pcp                                                                      |  |
| PGPEP1L | Pyroglutamyl-peptidase I-like                 |                                                                                                   |  |
| PGR     | Progesterone receptor                         | NR3C3, PR                                                                                         |  |
| PGRMC2  | Progesterone receptor membrane component 2    | DG6, PMBP                                                                                         |  |
| PGS1    | Phosphatidylglycerophosphate synthase 1       |                                                                                                   |  |
| PHACTR1 | Phosphatase and actin regulator 1             | RP1-257A7.1, RPEL, RPEL1, dJ257A7.2                                                               |  |
| PHACTR2 | Phosphatase and actin regulator 2             | RP3-468K18.3, C6orf56                                                                             |  |
| PHACTR4 | Phosphatase and actin regulator 4             | RP11-442N24__A.1, PPP1R124                                                                        |  |
| PHC1    | Polyhomeotic homolog 1 (Drosophila)           | EDR1, HPH1, MCPH11, RAE28                                                                         |  |
| PHC3    | Polyhomeotic homolog 3 (Drosophila)           | EDR3, HPH3                                                                                        |  |
| PHF10   | PHD finger protein 10                         | RP11-160E12.5, BAF45A, XAP135                                                                     |  |
| PHF11   | PHD finger protein 11                         | RP11-160E12.5, AT1, BCAT, IGEL, IGELK, IGELK, NTF1, DEN24, NTFDEN24                               |  |

|         |                                                                                         |                                                          |   |
|---------|-----------------------------------------------------------------------------------------|----------------------------------------------------------|---|
| PHF14   | PHD finger protein 14                                                                   |                                                          |   |
| PHF15   |                                                                                         |                                                          |   |
| PHF17   |                                                                                         |                                                          |   |
| PHF2    | PHD finger protein 2                                                                    | CENP-35, GRC5, JHDM1E                                    |   |
| PHF20   | PHD finger protein 20                                                                   | RP5-1121G12.1, C200H104, GLEA2, HCA58, NZL, TDRD20A, TZR |   |
| PHF20L1 | PHD finger protein 20-like 1                                                            | CGI-72, TDRD20B                                          |   |
| PHF3    | PHD finger protein 3                                                                    | RP1-22I17.3                                              |   |
| PHF6    | PHD finger protein 6                                                                    | AC004383.6, BFLS, BORJ, CENP-31                          | v |
| PHIP    | PHD domain homologous domain interacting protein                                        | RP11-173D14.2, BRWD2, DCAF14, WDR11, ndrp                |   |
| PHKA1   | Phosphorylase kinase, alpha 1 (muscle)                                                  | PHKA                                                     |   |
| PHLDA1  | PHD domain homologous-like domain, family A                                             | DT1P1B11, PHRIP, TDAG51                                  |   |
| PHLDB2  | PHD domain homologous-like domain, family B, PHD domain and leucine rich repeat protein | LL5b, LL5beta                                            |   |
| PHLPP2  | PHD domain homologous-like domain, family C                                             | PHLPP2                                                   |   |
| PHOX2B  | Paired-like homeobox 2b                                                                 | NBLST2, NBPhox, PMX2B                                    | v |
| PHTF1   | Putative homeodomain transcription factor 1                                             | RP4-730K3.2, PHTF                                        |   |
| PHTF2   | Putative homeodomain transcription factor 2                                             |                                                          |   |
| PHYHIPL | PHYH domain homologous-like domain                                                      | UNQ6309/PRO20934                                         |   |
| PI4K2A  | Phosphatidylinositol 4-kinase type 2 alpha                                              | RP11-548K23.6, PI4KII, PIK42A                            |   |
| PI4K2B  | Phosphatidylinositol 4-kinase type 2 beta                                               | PI4KIIB, PIK42B                                          |   |
| PIAS3   | Protein inhibitor of activated STAT, 3                                                  | ZMIZ5                                                    |   |
| PIBF1   | Progesterone immunomodulatory binding factor 1                                          | RP11-505F3.1, C13orf24, CEP90, PIBF                      |   |
| PICALM  | Phosphatidylinositol binding clathrin assembly protein                                  | CALM, CLTH, LAP                                          | v |
| PID1    | Protein tyrosine phosphatase domain                                                     | HMFN2073, NYGGF4, P-CL11, PCL11                          |   |
| PIGA    | Phosphatidylinositol glycan anchor                                                      | GPI3, MCAHS2, PIG-A, PNH1                                |   |
| PIGG    | Phosphatidylinositol glycan anchor                                                      | UNQ1950/PRO4405, GPI7, LAS21, PRO4405, PLGS1020          |   |
| PIGK    | Phosphatidylinositol glycan anchor                                                      | RP4-564M11.1, GPI8                                       |   |
| PIGW    | Phosphatidylinositol glycan anchor                                                      | Gwt1                                                     |   |
| PIGX    | Phosphatidylinositol glycan anchor                                                      | PIG-X                                                    |   |
| PIGY    | Phosphatidylinositol glycan anchor                                                      | PIG-Y                                                    |   |
| PIK3AP1 | Phosphoinositide-3-kinase adaptor protein 1                                             | RP11-34E5.3, BCAP                                        |   |
| PIK3C2A | Phosphatidylinositol-3-phosphate 5-kinase, class C                                      | CPK, PI3-K-C2(ALPHA), PI3-K-C2A                          |   |
| PIK3C2G | Phosphatidylinositol-3-phosphate 5-kinase, class C                                      | PI3K-C2-gamma, PI3K-C2GAMMA                              |   |
| PIK3C3  | Phosphatidylinositol 3-kinase, catalytic subunit type 2                                 | VPS34, hVps34                                            |   |

|          |                                                                                 |                                                                |   |
|----------|---------------------------------------------------------------------------------|----------------------------------------------------------------|---|
| PIK3R1   | Phosphoinositide-3-kinase, regulatory                                           | AGM7, GRB1, p85, p85-ALPHA                                     | √ |
| PIK3R3   | Phosphoinositide-3-kinase, regulatory                                           | RP4-533D7.2, p55, p55-GAMMA                                    |   |
| PIK3R5   | Phosphoinositide-3-kinase, regulatory                                           | F730038I15Rik, FOAP-2, P101-PI3K, p101                         |   |
| PIN4     | Pinhead (peptidylprolyl cis/trans isomerase)                                    | AL135749.5, EPVH, PAR14, PAR17                                 |   |
| PINX1    | PIN2/1/3/4 interacting, telomerase                                              | LPTL, LPTS                                                     |   |
| PIP4K2A  | Phosphatidylinositol-3-phosphate 4-kinase, class II                             | NP11-301N24.1, PIP4KA, PIP4K2A, PIP4KII-alpha, PIP4KIIA, PIP4K |   |
| PIP4K2B  | Phosphatidylinositol-3-phosphate 4-kinase, class II                             | PI5P4KB, PIP5K2B, PIP5KIIB, PIP5KIIbeta                        |   |
| PIP4K2C  | Phosphatidylinositol-3-phosphate 4-kinase, class II                             | PIP5K2C                                                        |   |
| PIP5K1P1 | Phosphatidylinositol-4-phosphate 3-kinase, class I                              |                                                                |   |
| PIRT     | Phosphoinositide-interacting regulator of transient receptor potential channels | hCG_1776018                                                    |   |
| PITPNA   | Phosphatidylinositol transfer protein, alpha                                    | HEL-S-36, PI-TPalpha, PITPN, VIB1A                             |   |
| PITPNB   | Phosphatidylinositol transfer protein, beta                                     | RP3-353E16.2, PI-TP-beta, PtdInsTP, VIB1B                      |   |
| PITPNC1  | Phosphatidylinositol transfer protein, cytosolic 1                              | IM-KDGB-beta, IMKDGBbeta, KDGB-BETA, KDGBD, PDCDD1             |   |
| PIWIL1   | Piwi-like RNA-mediated gene silencing 1                                         | CT80.1, HIWI, MIWI, PIWI                                       |   |
| PJA1     | Praja ring finger 1, E3 ubiquitin protein ligase                                | RP13-55H22.1, PRAJA1, RNF70                                    |   |
| PJA2     | Praja ring finger 2, E3 ubiquitin protein ligase                                | Neurodap1, RNF131                                              |   |
| PKD1L2   | Polycystic kidney disease 1-like 2                                              | PC1L2                                                          |   |
| PKD2     | Polycystic kidney disease 2 (autosomal recessive)                               | APKD2, PC2, PKD4, Pc-2, TRPP2                                  |   |
| PKDCC    | Protein kinase domain containing, polycystic kidney and hepatic disease 1       | SGK493, Vik                                                    |   |
| PKHD1    | Polycystic kidney and hepatic disease 1 (autosomal recessive)                   | ARPKD, FCYT, TIGM1                                             |   |
| PKN2     | Protein kinase N2                                                               | NP5-905H10.1, PAK2, PAK2, PAKK2, PAKK2L2, PAK2042, Pak-2, STK7 |   |
| PKNOX1   | PBX/knotted 1 homeobox 1                                                        | PREP1, pkonx1c                                                 |   |
| PKNOX2   | PBX/knotted 1 homeobox 2                                                        | PREP2                                                          |   |
| PKP2     | Plakophilin 2                                                                   | ARVD9                                                          |   |
| PKP4     | Plakophilin 4                                                                   | p0071                                                          |   |
| PLA2G12A | Phospholipase A2, group XIA                                                     | FKSG38, GXII, PLA2G12, ROSSY                                   |   |
| PLA2G2D  | Phospholipase A2, group IID                                                     | UNQ768, PLA2IID, SPLASH, sPLA2-IID, sPLA2S                     |   |
| PLA2G4A  | Phospholipase A2, group IVA (cytosolic, calcium independent)                    | PLA2G4, cPLA2-alpha                                            |   |
| PLA2G4C  | Phospholipase A2, group IV C (cytosolic, calcium independent)                   | CPLA2-gamma                                                    |   |
| PLA2G5   | Phospholipase A2, group V                                                       | FRFB, GV-PLA2, PLA2-10, hVPLA(2)                               |   |
| PLA2R1   | Phospholipase A2 receptor 1, 180 kDa                                            | CLEC13C, PLA2-R, PLA2G1R, PLA2IR, PLA2R                        |   |
| PLAC1L   |                                                                                 |                                                                |   |
| PLAC8    | Placenta-specific 8                                                             | BM-004, C15, DGIC, onzin                                       |   |

|          |                                                            |                                                                   |   |
|----------|------------------------------------------------------------|-------------------------------------------------------------------|---|
| PLAG1    | Pleiomorphic adenoma gene 1                                | PSA, SGPA, ZNF912                                                 | v |
| PLAU     | Plasminogen activator, urokinase                           | RP11-417O11.1, ATF, BDPLT5, QPD, UPA, URK, u-PA                   |   |
| PLBD2    | Phospholipase B domain containing 2                        | P76                                                               |   |
| PLCB1    | Phospholipase C, beta 1 (phosphoinositide-specific)        | RP4-034A7.1, ELETZ, PFPLC, PLC-134, PLC-1, PLC154A, PLCB1B, PLCB1 |   |
| PLCB3    | Phospholipase C, beta 3 (cholesterol-specific)             |                                                                   |   |
| PLCB4    | Phospholipase C, beta 4                                    | RP4-811H13.1, ARCND2, PI-PLC                                      |   |
| PLCD4    | Phospholipase C, delta 4                                   |                                                                   |   |
| PLCG1    | Phospholipase C, gamma 1                                   | RP3-511B24.2, NCKAP3, PLC-II, PLC1, PLC148, PLCgamma1             |   |
| PLCH1    | Phospholipase C, eta 1                                     | PLCL3                                                             |   |
| PLCL1    | Phospholipase C-like 1                                     | PLCE, PLCL, PLDL1, PPP1R127, PRIP                                 |   |
| PLCL2    | Phospholipase C-like 2                                     | PLCE2                                                             |   |
| PLCXD3   | Phosphatidylinositol-specific phospholipase C              |                                                                   |   |
| PLD1     | Phospholipase D1; phosphatidylinositol-specific            |                                                                   |   |
| PLD5     | Phospholipase D family, member 5                           | PLDC                                                              |   |
| PLDN     |                                                            |                                                                   |   |
| PLEK     | Pleckstrin                                                 | P47                                                               |   |
| PLEKHA1  | Pleckstrin homology domain containing, family 1, member 1  | RP11-436O19__A.1, TAPP1                                           |   |
| PLEKHA2  | Pleckstrin homology domain containing, family 1, member 2  | TAPP2                                                             |   |
| PLEKHA3  | Pleckstrin homology domain containing, family 1, member 3  | FAPP1                                                             |   |
| PLEKHA5  | Pleckstrin homology domain containing, family 1, member 5  | PEPP-2, PEPP2                                                     |   |
| PLEKHA6  | Pleckstrin homology domain containing, family 1, member 6  | RP11-203F10.4, PEPP-3, PEPP3                                      |   |
| PLEKHA8  | Pleckstrin homology domain containing, family 1, member 8  | FAPP2                                                             |   |
| PLEKHB2  | Pleckstrin homology domain containing, family 2, member 2  | EVT2                                                              |   |
| PLEKHG2  | Pleckstrin homology domain containing, family 2, member 2  | ARHGEF42, CLG                                                     |   |
| PLEKHG4B | Pleckstrin homology domain containing, family 2, member 4B |                                                                   |   |
| PLEKHH2  | Pleckstrin homology domain containing, family 2, member 2  | PLEKHH1L                                                          |   |
| PLEKHJ1  | Pleckstrin homology domain containing, family 2, member 1  | GMRPX                                                             |   |
| PLEKHM3  | Pleckstrin homology domain containing, family 2, member 3  | DAPR, PLEKHM1L                                                    |   |
| PLGLA    | Plasminogen-like A (pseudogene)                            |                                                                   |   |
| PLGLB1   | Plasminogen-like B1                                        |                                                                   |   |
| PLGLB2   | Plasminogen-like B2                                        |                                                                   |   |
| PLK1     | Polo-like kinase 1                                         | PLK, STPK13                                                       |   |
| PLP1     | Proteolipid protein 1                                      | CHC-098D2.1, GFMOC, HLD1, MIMPL, PL1, PL1/DM20, PML, SPC2         |   |

|          |                                                        |                                                                                                         |   |
|----------|--------------------------------------------------------|---------------------------------------------------------------------------------------------------------|---|
| PLRG1    | Pleiotropic regulator 1                                | Cwc1, PRL1, PRP46, PRPF46, TANGO4                                                                       |   |
| PLS1     | Plastin 1                                              |                                                                                                         |   |
| PLS3     | Plastin 3                                              | BMND18, T-plastin                                                                                       |   |
| PLSCR2   | Phospholipid scramblase 2                              |                                                                                                         |   |
| PLSCR5   | Phospholipid scramblase family, member 5               |                                                                                                         |   |
| PLVAP    | Plasmalemma vesicle associated protein                 |                                                                                                         |   |
| PLXDC2   | Plexin domain containing 2                             |                                                                                                         |   |
| PLXNA3   | Plexin A3                                              | AA-TW81057D9.5, U.S, HSSLAGENE, PLXNA3, PLXNA4, Vag7.1291, FATV2820, FLEXA4A, PLXNA4D, PRQ24002, PLXNA4 |   |
| PLXNA4   | Plexin A4                                              |                                                                                                         |   |
| PM20D2   | Peptidase M20 domain containing 2                      | ACY1L2, bA63L7.3                                                                                        |   |
| PMAIP1   | Protein-12-myristate-13-acetate-induced 1              | APR, NOXA                                                                                               |   |
| PMCHL1   | Protein-12-myristate-13-acetate-induced 1              |                                                                                                         |   |
| PMCHL2   | Protein-12-myristate-13-acetate-induced 2              |                                                                                                         |   |
| PML      | Promyelocytic leukemia                                 | MYL, PP8675, RNF71, TRIM19                                                                              | √ |
| PMPCB    | Peptidase (mitochondrial processing) beta              | Beta-MPP, MPP11, MPPB, MPPP52, P-52                                                                     |   |
| PMS1     | PMS1 postmeriotic segregation increased 1              | HNPCC3, PMSL1, hPMS1                                                                                    | √ |
| PMS2L5   | PMS2L5 postmeriotic segregation increased 5            |                                                                                                         |   |
| PNLIPRP1 | Pancreatic lipase-related protein 1                    |                                                                                                         |   |
| PNLIPRP3 | Pancreatic lipase-related protein 3                    |                                                                                                         |   |
| PNMA1    | Paraneoplastic Ma antigen 1                            | MA1                                                                                                     |   |
| PNMA2    | Paraneoplastic Ma antigen 2                            | MA2, MM2, RGAG2                                                                                         |   |
| PNMAL1   | Paraneoplastic Ma antigen family-like 1                |                                                                                                         |   |
| PNN      | Pinin, desmosome associated protein                    | DRS, DRSP, SDK3, memA                                                                                   |   |
| PNPLA1   | Protein-12-myristate-13-acetate-induced 1              | RP1-50J22.1, ARCI10, dJ50J22.1                                                                          |   |
| PNPT1    | Polyribonucleotide nucleotidyltransferase 1            | COXPD13, DFNB70, OLD35, PNPASE, old-35                                                                  |   |
| PNRC1    | Proline-rich nuclear receptor coactivator 1            | RP11-63L7.5, B4-2, PNAS-145, PROL2, PRR2                                                                |   |
| PNRC2    | Proline-rich nuclear receptor coactivator 2            | RP11-4M23.5                                                                                             |   |
| POC1B    | POC1 centriolar protein B                              | PIX1, TUWD12, WDR51B                                                                                    |   |
| PODXL    | Podocalyxin-like                                       | Gp200, PC, PCLP, PCLP-1                                                                                 |   |
| POFUT1   | Protein O-fucosyltransferase 1                         | DDD2, FUT12, O-FUT, O-Fuc-T, O-FucT-1, OFUCT1                                                           |   |
| POGK     | Pogo transposable element with KRAB                    | LST003, BASS2, KRBOX2                                                                                   |   |
| POLA1    | Polymerase (DNA-directed), alpha 1,                    | NSX, POLA, p180                                                                                         |   |
| POLDIP2  | Polymerase (DNA-directed), delta interacting protein 2 | HSPC017, PDIP38, POLD4, p38                                                                             |   |

|           |                                                     |                                                                    |   |
|-----------|-----------------------------------------------------|--------------------------------------------------------------------|---|
| POLH      | Polymerase (DNA directed), eta                      | RP11-22I24.1, RAD30, RAD30A, XP-V, XPV                             |   |
| POLI      | Polymerase (DNA directed) iota                      | RAD30B, RAD30B                                                     |   |
| POLK      | Polymerase (DNA directed) kappa                     | DINB1, DINP, POLQ                                                  |   |
| POLM      | Polymerase (DNA directed), mu                       | Pol Mu, Tdt-N                                                      |   |
| POLQ      | Polymerase (DNA directed), theta                    | POLH, PRO0327                                                      |   |
| POLR2D    | Polymerase (RNA) II (DNA directed)                  | HSRBP4, HSRPB4, RBP4, RPB16                                        |   |
| POLR2K    | Polymerase (RNA) II (DNA directed)                  | ADC10-alpha, KI ADC4, KI BT0alpha, KI BT2, KI BT3, LRRP7.0, LRRP10 |   |
| POLR3B    | Polymerase (RNA) III (DNA directed)                 | C128, HLD8, INMAP, RPC2                                            |   |
| POLR3F    | Polymerase (RNA) III (DNA directed)                 | RPC39, RPC6                                                        |   |
| POLR3G    | Polymerase (RNA) III (DNA directed)                 | RPC32, RPC7                                                        |   |
| POLR3K    | Polymerase (RNA) III (DNA directed)                 | My010, C11, C11-RNP3, RPC10, RPC11, RPC12.5                        |   |
| POM121    | POM121 transmembrane nucleoporin                    | P145A, POM121                                                      |   |
| POM121C   | POM121 transmembrane nucleoporin C                  | POM121-2                                                           |   |
| POM121L8P | POM121 transmembrane nucleoporin-like 8             |                                                                    |   |
| POM121L9P | POM121 transmembrane nucleoporin-like 9, pseudogene |                                                                    |   |
| POMC      | Proopiomelanocortin                                 | ACTH, CLIP, LPH, MSH, NPP, POC                                     |   |
| POMGNT1   | Protein O-linked mannosyl transferase 1             | KFT1-322N21.5, GNT1.2, GNT1.2, LGMD20, MED, MGAT1.2, MGAT1.3       |   |
| POP1      | Processing of precursor 1, ribonuclease             |                                                                    |   |
| POP4      | Processing of precursor 4, ribonuclease             | RPP29                                                              |   |
| POSTN     | Periostin, osteoblast specific factor               | RP11-412K4.1, OSF-2, OSF2, PDLPOSTN, PN, periostin                 |   |
| POTEA     | POTE ankyrin domain family, member A                | A26A1, CT104.3, POTE-8, POTE8                                      |   |
| POTEC     | POTE ankyrin domain family, member C                | A26B2, CT104.6, POTE-18, POTE18                                    |   |
| POTEG     | POTE ankyrin domain family, member G                | A20C2, ACTB1, CT104.4, POTE-14, POTE14, POTE14-like, POTE22        |   |
| POU2F2    | POU class 2 homeobox 2                              | OCT2, OTF2, Oct-2                                                  |   |
| POU3F2    | POU class 3 homeobox 2                              | BRN2, N-Oct3, OCT7, OTF7, OTF7, POU3, bin-2, Oct-7                 |   |
| POU4F2    | POU class 4 homeobox 2                              | BRN3.2, BRN3B, Brn-3b                                              |   |
| PPA1      | Pyrophosphatase (inorganic) 1                       | RP11-367H5.1, HEL-S-66p, IOPPP, PP, PP1, SID6-8061                 |   |
| PPAP2A    | Phosphatidic acid phosphatase type 2A               | LLP1a, LPP1, PAP-2a, PAP2                                          |   |
| PPAP2B    | Phosphatidic acid phosphatase type 2B               | Dri42, LPP3, PAP2B, VCIP                                           |   |
| PPAPDC1A  | Phosphatidic acid phosphatase type 2                | RP11-257O17.1, DPPL2, PPAPDC1                                      |   |
| PPARA     | Peroxisome proliferator-activated receptor          | SC22CB-5E3.5, NR1C1, PPAR, PPARalpha, hPPAR                        |   |
| PPARG     | Peroxisome proliferator-activated receptor          | CIMT1, GEM1, NR1C3, PARG2, PARGgamma, PPARC                        | v |
| PPARGC1A  | Peroxisome proliferator-activated receptor          | LEM6, PGC-1(alpha), PGC-1v, PGC1, PGC1A, PPARGC1                   |   |



|          |                                                                      |                                                      |  |
|----------|----------------------------------------------------------------------|------------------------------------------------------|--|
| PPAT     | Phosphatidyl pyrophosphatase                                         | ATASE, GPAT, PRAT                                    |  |
| PPCS     | Phosphopantothenoylcysteine synthetase                               | RP11-163G10.1                                        |  |
| PPFIA1   | Protein tyrosine phosphatase, receptor type, 1                       | LIP.1, LIP1, LIPRIN                                  |  |
| PPFIA3   | Protein tyrosine phosphatase, receptor type, 1                       | LPNA3                                                |  |
| PPFIA4   | Protein tyrosine phosphatase, receptor type, 1                       |                                                      |  |
| PPFIBP1  | Protein tyrosine phosphatase interacting protein, 1 (Lisitin beta 1) | L2, SGT2, hSGT2, hSgt2p                              |  |
| PPHLN1   | Periplakin 1                                                         | HSPC206, HSPC232                                     |  |
| PPIL1    | Peptidylprolyl isomerase (cyclophilin)-like 1                        | CGI-124, CYPL1, PPIase, hCyPX                        |  |
| PPIL5    |                                                                      |                                                      |  |
| PPIL6    | Peptidylprolyl isomerase (cyclophilin)-like 6                        | NP11-425D10.0, PPIase, KSH112, OA425D10.0, H010E10.1 |  |
| PPP5K2   | Diphosphoinositol pentakisphosphate kinase 2                         | HISPPD1, IP7K2, VIP2                                 |  |
| PPL      | Periplakin                                                           |                                                      |  |
| PPM1A    | Protein phosphatase, Mg <sup>2+</sup> /Mn <sup>2+</sup> dependent,   | PP2C-ALPHA, PP2CA, PP2Calpha                         |  |
| PPM1B    | Protein phosphatase, Mg <sup>2+</sup> /Mn <sup>2+</sup> dependent,   | PP2C-beta, PP2C-beta-A, PP2CB, PP2CBETA, PPC2BETA-X  |  |
| PPM1D    | Protein phosphatase, Mg <sup>2+</sup> /Mn <sup>2+</sup> dependent,   | PP2C-DELTA, WIP1                                     |  |
| PPM1E    | Protein phosphatase, Mg <sup>2+</sup> /Mn <sup>2+</sup> dependent,   | CaMKP-N, POPX1, PP2CH, caMKN                         |  |
| PPM1K    | Protein phosphatase, Mg <sup>2+</sup> /Mn <sup>2+</sup> dependent,   | BDP, MSUDMV, PP2CKappa, PP2CK, P1MI, UG0892E07       |  |
| PPM1L    | Protein phosphatase, Mg <sup>2+</sup> /Mn <sup>2+</sup> dependent,   | PP2C-epsilon, PP2CE, PPM1-LIKE                       |  |
| PPP1CB   | Protein phosphatase 1, catalytic subunit, beta                       | HEL-S-80p, PP-1B, PP1B, PP1beta, PPP1CD              |  |
| PPP1R12B | Protein phosphatase 1, regulatory subunit 12B                        | MYPT2, PP1bp55                                       |  |
| PPP1R12C | Protein phosphatase 1, regulatory subunit 12C                        | LENG3, MBS85, p84, p85                               |  |
| PPP1R13B | Protein phosphatase 1, regulatory subunit 13B                        | ASPP1, p53BP2-like, p85                              |  |
| PPP1R14C | Protein phosphatase 1, regulatory (inhibitor) subunit 14C            | CPI17-like, KEPI, NY-BR-81                           |  |
| PPP1R1C  | Protein phosphatase 1, regulatory (inhibitor) subunit 1C             | IPP5                                                 |  |
| PPP1R2   | Protein phosphatase 1, regulatory (inhibitor) subunit 2              | IPP-2, IPP2                                          |  |
| PPP1R2P3 | Protein phosphatase 1, regulatory (inhibitor) subunit 2 pseudogene 3 |                                                      |  |
| PPP1R3B  | Protein phosphatase 1, regulatory subunit 3B                         | GL, PPP1R4, PTG                                      |  |
| PPP1R3C  | Protein phosphatase 1, regulatory subunit 3C                         | PPP1R5                                               |  |
| PPP1R3D  | Protein phosphatase 1, regulatory subunit 3D                         | PPP1R6                                               |  |
| PPP1R8   | Protein phosphatase 1, regulatory subunit 8                          | RP4-547C9.1, ARD-1, ARD1, NIPP-1, NIPP1, PRO2047     |  |
| PPP1R9A  | Protein phosphatase 1, regulatory subunit 9A                         | NRB1, NRBI, Neurabin-1                               |  |
| PPP2R1B  | Protein phosphatase 2, regulatory subunit A,                         | PP2A-Abeta, PR65B                                    |  |
| PPP2R2C  | Protein phosphatase 2, regulatory subunit D,                         | B55-GAMMA, IMYPNO, IMYPNO1, PR52, PR55G              |  |

|          |                                                      |                                                                            |   |
|----------|------------------------------------------------------|----------------------------------------------------------------------------|---|
| PPP2R3A  | Protein phosphatase 2, regulatory subunit B, alpha   | PPP2R3, PR130, PR72                                                        |   |
| PPP2R3C  | Protein phosphatase 2, regulatory subunit B, gamma   | C14orf10, G4-1, G5pr                                                       |   |
| PPP2R5A  | Protein phosphatase 2, regulatory subunit B, delta   | B56A, PR61A                                                                |   |
| PPP2R5C  | Protein phosphatase 2, regulatory subunit B, epsilon | B56G, PR61G                                                                |   |
| PPP2R5E  | Protein phosphatase 2, regulatory subunit B, zeta    |                                                                            |   |
| PPP3CB   | Protein phosphatase 3, catalytic subunit, beta       | RP11-345K20.1, CALNA2, CALNB, CNA2, PP2Bbeta                               |   |
| PPP3R1   | Protein phosphatase 3, regulatory subunit B, alpha   | CALNB1, CNB, CNB1                                                          |   |
| PPP4C    | Protein phosphatase 4, catalytic subunit             | PP4, PP4C, PPH3, PPP4, PPX                                                 |   |
| PPP4R1   | Protein phosphatase 4, regulatory subunit 1          | MEG1, PP4(Rmeg), PP4R1                                                     |   |
| PPP4R4   | Protein phosphatase 4, regulatory subunit 4          | CFAP14, KIAA1622, PP4R4                                                    |   |
| PPP6C    | Protein phosphatase 6, catalytic subunit             | RP11-366O20.1, PP6, PP6C                                                   |   |
| PPPDE1   |                                                      |                                                                            |   |
| PQLC1    | PQ loop repeat containing 1                          |                                                                            |   |
| PRAMEF11 | PRAME family member 11                               |                                                                            |   |
| PRAMEF13 | PRAME family member 14                               | RP11-584P2.2, PRAMEF13                                                     |   |
| PRAMEF14 | PRAME family member 14                               | RP11-584P2.2, PRAMEF13                                                     |   |
| PRAMEF4  | PRAME family member 4                                | RP5-845O24.6                                                               |   |
| PRAMEF5  | PRAME family member 5                                | PRAMEF23L, PRAMEF5                                                         |   |
| PRAMEF6  | PRAME family member 6                                |                                                                            |   |
| PRAMEF9  | PRAME family member 9                                |                                                                            |   |
| PRC1     | Protein regulator of cytokinesis 1                   | ASE1                                                                       |   |
| PRCD     | Progressive rod-cone degeneration                    | RP36                                                                       |   |
| PRCP     | Prolylcarboxypeptidase (angiotensinase C)            | HUMPCP, PCP                                                                |   |
| PRDM1    | PR domain containing 1, with ZNF domain              | RP1-134E15.1, BLIMP1, PRDI-BF1                                             | v |
| PRDM10   | PR domain containing 10                              | PFM7                                                                       |   |
| PRDM15   | PR domain containing 15                              | C21orf83, PFM15, ZNF298                                                    |   |
| PRDM2    | PR domain containing 2, with ZNF domain              | KIF5-1177E19.1, HUMH10A11, KMT6, MTD-Z1, KIZ, RIZ1, RIZ2                   |   |
| PRDM4    | PR domain containing 4                               | PFM1                                                                       |   |
| PRDM6    | PR domain containing 6                               |                                                                            |   |
| PRDM8    | PR domain containing 8                               | PFM5                                                                       |   |
| PRDX3    | Peroxiredoxin 3                                      | AOI-1, AOI1, HBC189, MLK3, PRO1748, SF-22, PIA-III                         |   |
| PRDX5    | Peroxiredoxin 5                                      | SBDB10, ACK1, AOED100, BT00, HELL-S-55, FLI1, PMP20, PRDX6, PRDXV, PRDXV.1 |   |
| PRELID2  | PRELI domain containing 2                            |                                                                            |   |

|          |                                                                          |                                                                                    |  |
|----------|--------------------------------------------------------------------------|------------------------------------------------------------------------------------|--|
| PREPL    | Prolyl endopeptidase-like                                                |                                                                                    |  |
| PREX2    | Phosphatidylinositol-3,4,5-trisphosphate-dependent Rac exchange factor 2 | 6230420N16Rik, DEP.2, DEPDC2, P-REX2, PPP1R129                                     |  |
| PRG1     | P53-responsive gene 1                                                    |                                                                                    |  |
| PRH2     | Proline-rich protein HaeIII subfamily 2                                  | PIF-S, PRH1, PRP-1/PRP-2, Pr, db-s, pa, pr1/Pr2                                    |  |
| PRICKLE2 | Prickle homolog 2 (Drosophila)                                           | EPM5                                                                               |  |
| PRIMA1   | Proline rich membrane anchor 1                                           | PRIMA                                                                              |  |
| PRINS    |                                                                          |                                                                                    |  |
| PRKAA2   | Protein kinase, AMP-activated, alpha 2                                   | AMPK, AMPK2, AMPKa2, PRKAA                                                         |  |
| PRKAB1   | Protein kinase, AMP-activated, beta 1 non-catalytic subunit              | AMPK, HAMPKb                                                                       |  |
| PRKAB2   | Protein kinase, AMP-activated, beta 2 non-catalytic subunit              |                                                                                    |  |
| PRKACB   | Protein kinase, cAMP-dependent, catalytic, type II, beta                 | RP11-82H13.1, PKA C-beta, PKACB                                                    |  |
| PRKAG2   | Protein kinase, AMP-activated, gamma 2 non-catalytic subunit             | AAKG, AAKG2, CMH6, H91620p, WPWS                                                   |  |
| PRKAG3   | Protein kinase, AMP-activated, gamma 3 non-catalytic subunit             | AMPKG3                                                                             |  |
| PRKAR2B  | Protein kinase, cAMP-dependent, regulatory, type II, beta                | PRKAR2, RII-BETA                                                                   |  |
| PRKCA    | Protein kinase C, alpha                                                  | AAG6, PKC-alpha, PKCA, PRKACA                                                      |  |
| PRKCB    | Protein kinase C, beta                                                   | PKC-beta, PKCB1, PRKCB2, PRKCB                                                     |  |
| PRKCD    | Protein kinase C, delta                                                  | CVID9, MAY1, PKCD, nPKC-delta                                                      |  |
| PRKCDBP  | Protein kinase C, delta binding protein                                  | CAVIN3, HSRBC, SRBC, cavin-3                                                       |  |
| PRKCE    | Protein kinase C, epsilon                                                | PKCE, nPKC-epsilon                                                                 |  |
| PRKCI    | Protein kinase C, iota                                                   | DXS1179E, PKCI, nPKC-iota                                                          |  |
| PRKD1    | Protein kinase D1                                                        | PKC-MU, PKCM, PKD, PRKCM                                                           |  |
| PRKD2    | Protein kinase D2                                                        | HSPC187, PKD2, nPKC-D2                                                             |  |
| PRKD3    | Protein kinase D3                                                        | EPK2, PKC-NU, PKD3, PRKCN, nPKC-NU                                                 |  |
| PRKG1    | Protein kinase, cGMP-dependent, type I                                   | RP11-340D6.1, 1, AAT6, PRKB, PRKGR1B, CGK, CGK1, CGK1L, CGK1BETA, CGK1delta, PRKCI |  |
| PRKRIP1  | PRKR interacting protein 1 (IL11 inducible)                              | C114, KRBOX3                                                                       |  |
| PRKX     | Protein kinase, X-linked                                                 | PKX1                                                                               |  |
| PRKY     | Protein kinase, Y-linked, pseudogene                                     | PRKXP3P, PRKY                                                                      |  |
| PRLR     | Prolactin receptor                                                       | HPRL, MFAB, hPRLrI                                                                 |  |
| PRM1     | Protamine 1                                                              | CT94.1, P1                                                                         |  |
| PRMT1    | Protein arginine methyltransferase 1                                     | ANM1, HCP1, HRMT1L2, IR1B4                                                         |  |
| PRMT2    | Protein arginine methyltransferase 2                                     | HRMT1L1                                                                            |  |
| PRMT3    | Protein arginine methyltransferase 3                                     | HRMT1L3                                                                            |  |
| PRMT8    | Protein arginine methyltransferase 8                                     | HRMT1L3, HRMT1L4                                                                   |  |

|         |                                                                         |                                                                                                    |  |
|---------|-------------------------------------------------------------------------|----------------------------------------------------------------------------------------------------|--|
| PRND    | Prion protein 2 (dublet)                                                | UNQ1850/PRO5443, DDFEL, DFL, FFLF, H106916.4                                                       |  |
| PRO0611 | PRO0611 protein                                                         |                                                                                                    |  |
| PRO0628 | uncharacterized LOC29053                                                |                                                                                                    |  |
| PRO1768 | FOXN3 antisense RNA 2                                                   | PRO1768                                                                                            |  |
| PROCR   | protein C receptor, endothelial                                         | CCCA, CCD41, EPCR                                                                                  |  |
| PRODH   | proline dehydrogenase (oxidase) 1                                       | HSPOX2, PIG6, POX1, PRODH2, TP53I6, PRODH                                                          |  |
| PROM2   | prominin 2                                                              | UNQ2521/PRO6014, PROML2                                                                            |  |
| PROX1   | prospero homeobox 1                                                     |                                                                                                    |  |
| PRPF18  | pre-mRNA processing factor 18                                           | RP11-295P9.7, PRP18, hPrp18                                                                        |  |
| PRPF3   | pre-mRNA processing factor 3                                            | HPRP3, HPRP3P, PRP3, Prp3p, RP18, SNRNP90                                                          |  |
| PRPF39  | pre-mRNA processing factor 39                                           |                                                                                                    |  |
| PRPF40A | PRPF40 pre-mRNA processing factor 40 homolog A ( <i>S. cerevisiae</i> ) | HSPC223, FBF11, FBF11, FLAF1, FNF13, HNF10, IIP3-1013A0.2, IPRF1, IPRF4, IPRF11, IPRF4K, U013A.1A1 |  |
| PRPF4B  | pre-mRNA processing factor 4B                                           | AUMD, AVMD, CAUDZ, DS, FNF11, KDS, K17, TSPAN2, U013A.1B                                           |  |
| PRPH2   | peripherin 2 (retinal degeneration, slow)                               |                                                                                                    |  |
| PRPS2   | phosphoribosyl pyrophosphate synthetase 2                               | PRSII                                                                                              |  |
| PRR13   | proline rich 13                                                         | BM-041, TXR1                                                                                       |  |
| PRR20A  | proline rich 20A                                                        | PRR20                                                                                              |  |
| PRR5    | proline rich 5 (renal)                                                  | K11-181C9.3, FLJ20183K, P1010, PROTOR-1, PROTOR1                                                   |  |
| PRR5L   | proline rich 5 like                                                     | PROTOR2                                                                                            |  |
| PRRC1   | proline-rich coiled-coil 1                                              |                                                                                                    |  |
| PRRG1   | proline rich Gla (G-carboxyglutamic acid) 1                             | PRGP1                                                                                              |  |
| PRRG3   | proline rich Gla (G-carboxyglutamic acid) 3 (mammary)                   | PRGP3, TMG3                                                                                        |  |
| PRSS16  | protease, serine, 16 (thymus)                                           | XXbac-BPG24O18.5, TSSP                                                                             |  |
| PRSS36  | Protease, serine, 36                                                    |                                                                                                    |  |
| PRSS37  | Protease, serine, 37                                                    | TRYX2                                                                                              |  |
| PRSS55  | protease, serine, 55                                                    | UNQ9391/PRO34284, CT153, T-SP1, TSP1, UNQ9391                                                      |  |
| PRSSL1  |                                                                         |                                                                                                    |  |
| PRTG    | Protogenin                                                              | IGDCC5                                                                                             |  |
| PRUNE   | Prune exopolyphosphatase                                                | RP11-316M1.6, DRES-17, DRES17, HTCD37                                                              |  |
| PRUNE2  | Prune homolog 2 (Drosophila)                                            | K11-214N10.3, A214N10.3, DMCC1, DMFAL, G0365, KIAA0267, LA214N16.2                                 |  |
| PSAP    | Prosaposin                                                              | GLBA, SAPI                                                                                         |  |
| PSAPL1  | Prosaposin-like 1 (gene/pseudogene)                                     |                                                                                                    |  |
| PSAT1   | Phosphoserine aminotransferase 1                                        | EPIP, PSA, PSAT                                                                                    |  |

|           |                                                             |                                                           |   |
|-----------|-------------------------------------------------------------|-----------------------------------------------------------|---|
| PSD3      | Pleckstrin and Sec7 domain containing 3                     | EFA6R, HCA67                                              |   |
| PSEN1     | Presenilin 1                                                | AD3, FAD, PS-1, PS1, S182                                 |   |
| PSG11     | Pregnancy specific beta-1-glycoprotein 11                   | PSBG-11, PSBG-13, PSG13, PSG14                            |   |
| PSG2      | Pregnancy specific beta-1-glycoprotein 2                    | CEA, PSBG2, PSG1                                          |   |
| PSG3      | Pregnancy specific beta-1-glycoprotein 3                    |                                                           |   |
| PSG5      | Pregnancy specific beta-1-glycoprotein 5                    | FL-NCA-3, PSG                                             |   |
| PSG6      | Pregnancy specific beta-1-glycoprotein 6                    | PSBG-10, PSBG-12, PSBG-6, PSG10, PSGGB                    |   |
| PSG9      | Pregnancy specific beta-1-glycoprotein 9                    | PS34; PSG11; PSGII; PSBG-9; PSBG-11                       |   |
| PSIP1     | PC4 and SFRS1 interacting protein 1                         | DFS70, LEDGF, PAIP, PSIP2, p52, p75                       | √ |
| psiTPTE22 |                                                             |                                                           |   |
| PSKH1     | Protein serine kinase H1                                    |                                                           |   |
| PSMA8     | Proteasome (prosome, macropain) subunit, alpha 8            | PSMA7L                                                    |   |
| PSMB2     | Proteasome (prosome, macropain) subunit, beta 2             | RP5-983H21.1, HC7-I                                       |   |
| PSMB4     | Proteasome (prosome, macropain) subunit, beta 4             | HN3, HsN3, PROS-26, PROS26                                |   |
| PSMC6     | Proteasome (prosome, macropain) subunit, alpha 6            | DELTA, LMPY, Y                                            |   |
| PSMD10    | Proteasome (prosome, macropain) zeta 10                     | RP5-889N15.3, dJ889N15.2, p28, p28(GANK)                  |   |
| PSMD13    | Proteasome (prosome, macropain) zeta 13                     | HSPC027, Rpn9, S11, p40.5                                 |   |
| PSMD5     | Proteasome (prosome, macropain) zeta 5                      | RP11-271I.5, S5B                                          |   |
| PSMD8     | Proteasome (prosome, macropain) zeta 8                      | HEL-S-91n, HIP6, HYPF, Nin1p, Rpn12, S14, p31             |   |
| PSME4     | Proteasome (prosome, macropain) activator 4                 | PA200                                                     |   |
| PSMF1     | Proteasome (prosome, macropain) inhibitor 1                 | RP4-545L17.1, PI31                                        |   |
| PSMG2     | Proteasome (prosome, macropain) assembly chaperone 2        | CLAST15, HCCA3, HST11707, MDS005, PAC2, TME85ID1          |   |
| PSMG3     | Proteasome (prosome, macropain) assembly chaperone 3        | C7orf48, PAC3                                             |   |
| PSORS1C1  | Psoriasis susceptibility 1 candidate 1                      | DADB-141O4.2, C6orf16, SEEK1                              |   |
| PSPC1     | Paraspeckle component 1                                     | RP11-523H24.2, PSP1                                       |   |
| PSRC1     | Proline/serine-rich coiled-coil 1                           | RP11-297O4.2, DDA3, FP3214                                |   |
| PSTPIP1   | Proline-serine-threonine phosphatase interacting protein 1  | CD2BP1, CD2BP1L, CD2BP1S, H-PIP, PAPAS, PSTPIP            |   |
| PTAFR     | Platelet-activating factor receptor                         | PAFR                                                      |   |
| PTAR1     | Protein prenyltransferase alpha subunit repeat containing 1 | RP11-109D9.2                                              |   |
| PTBP2     | Polypyrimidine tract binding protein 2                      | PTBLP, brPTB, nPTB                                        |   |
| PTCD3     | Pentatricopeptide repeat domain 3                           | TRG15, MRP-S39                                            |   |
| PTCH1     | Patched 1                                                   | KPT1-455O5.3, BCNS, HPE7, INCCS, TTC, TTC1, PTCH1, PTCH1L |   |
| PTEN      | Phosphatase and tensin homolog                              | PTQ23del, BZS, CWS1, DEC, GLM2, MIAMI, MMAC11, TER1, PTEN | √ |

|         |                                                   |                                                                                                                                                                                                                                                                                                                                                                                                                                                                                                                                                                                                                                                                                                                                                                                                                                                                                 |   |
|---------|---------------------------------------------------|---------------------------------------------------------------------------------------------------------------------------------------------------------------------------------------------------------------------------------------------------------------------------------------------------------------------------------------------------------------------------------------------------------------------------------------------------------------------------------------------------------------------------------------------------------------------------------------------------------------------------------------------------------------------------------------------------------------------------------------------------------------------------------------------------------------------------------------------------------------------------------|---|
| PTGER3  | Prostaglandin E receptor 3 (subtype EP3)          | RP5-952N6.2, EP3, EP3-I, EP3-II, EP3-III, EP3-IV, EP3E, PGE2R                                                                                                                                                                                                                                                                                                                                                                                                                                                                                                                                                                                                                                                                                                                                                                                                                   |   |
| PTGER4  | Prostaglandin E receptor 4 (subtype EP4)          | EP4, EP4R                                                                                                                                                                                                                                                                                                                                                                                                                                                                                                                                                                                                                                                                                                                                                                                                                                                                       |   |
| PTGES3  | Prostaglandin E synthase 3 (cytosolic)            | P23, TEBP, cPGES                                                                                                                                                                                                                                                                                                                                                                                                                                                                                                                                                                                                                                                                                                                                                                                                                                                                |   |
| PTGFR   | Prostaglandin F receptor (FP)                     | RP5-944H6.1, FP                                                                                                                                                                                                                                                                                                                                                                                                                                                                                                                                                                                                                                                                                                                                                                                                                                                                 |   |
| PTGFRN  | Prostaglandin F2 receptor inhibitor               | CD315, CD9P-1, EWI-F, FPRP, SMAP-6                                                                                                                                                                                                                                                                                                                                                                                                                                                                                                                                                                                                                                                                                                                                                                                                                                              |   |
| PTGIS   | Prostaglandin I2 (prostacyclin) synthase          | CYP8, CYP8A1, PGIS, PTGI                                                                                                                                                                                                                                                                                                                                                                                                                                                                                                                                                                                                                                                                                                                                                                                                                                                        |   |
| PTGR2   | Prostaglandin reductase 2                         | HEL-S-298, PGR2, ZADH1                                                                                                                                                                                                                                                                                                                                                                                                                                                                                                                                                                                                                                                                                                                                                                                                                                                          |   |
| PTGS1   | Prostaglandin-endoperoxide synthase 1             | RP11-542K25.0, COX1, COX3, PCO1, PLS-1,                                                                                                                                                                                                                                                                                                                                                                                                                                                                                                                                                                                                                                                                                                                                                                                                                                         |   |
| PTGS2   | Prostaglandin-G/H synthase 2 (cyclooxygenase 2)   | COX-2, COX2, CYP2C8, CYP2C9, CYP2C10, CYP2C11, CYP2C12, CYP2C13, CYP2C14, CYP2C15, CYP2C16, CYP2C17, CYP2C18, CYP2C19, CYP2C20, CYP2C21, CYP2C22, CYP2C23, CYP2C24, CYP2C25, CYP2C26, CYP2C27, CYP2C28, CYP2C29, CYP2C30, CYP2C31, CYP2C32, CYP2C33, CYP2C34, CYP2C35, CYP2C36, CYP2C37, CYP2C38, CYP2C39, CYP2C40, CYP2C41, CYP2C42, CYP2C43, CYP2C44, CYP2C45, CYP2C46, CYP2C47, CYP2C48, CYP2C49, CYP2C50, CYP2C51, CYP2C52, CYP2C53, CYP2C54, CYP2C55, CYP2C56, CYP2C57, CYP2C58, CYP2C59, CYP2C60, CYP2C61, CYP2C62, CYP2C63, CYP2C64, CYP2C65, CYP2C66, CYP2C67, CYP2C68, CYP2C69, CYP2C70, CYP2C71, CYP2C72, CYP2C73, CYP2C74, CYP2C75, CYP2C76, CYP2C77, CYP2C78, CYP2C79, CYP2C80, CYP2C81, CYP2C82, CYP2C83, CYP2C84, CYP2C85, CYP2C86, CYP2C87, CYP2C88, CYP2C89, CYP2C90, CYP2C91, CYP2C92, CYP2C93, CYP2C94, CYP2C95, CYP2C96, CYP2C97, CYP2C98, CYP2C99, CYP2C100 |   |
| PTH LH  | Parathyroid hormone-like hormone                  | BDE2, HHM, PLP, PTHR, PTHRP                                                                                                                                                                                                                                                                                                                                                                                                                                                                                                                                                                                                                                                                                                                                                                                                                                                     |   |
| PTK2B   | Protein tyrosine kinase 2 beta                    | CADTK, CAKB, FADK2, FAK2, FRK, FTK, FTK2, PAFFK                                                                                                                                                                                                                                                                                                                                                                                                                                                                                                                                                                                                                                                                                                                                                                                                                                 |   |
| PTPDC1  | Protein tyrosine phosphatase domain               | RP11-490F3.2, PTP9Q22                                                                                                                                                                                                                                                                                                                                                                                                                                                                                                                                                                                                                                                                                                                                                                                                                                                           |   |
| PTPLAD1 | Protein tyrosine phosphatase-like A domain        | B-IND1, BIND1, HACD3, HSPC121                                                                                                                                                                                                                                                                                                                                                                                                                                                                                                                                                                                                                                                                                                                                                                                                                                                   |   |
| PTPN2   | Protein tyrosine phosphatase, non-receptor        | PTN2, PTPT, TC-PTP, TCELLPTP, TCPTP                                                                                                                                                                                                                                                                                                                                                                                                                                                                                                                                                                                                                                                                                                                                                                                                                                             |   |
| PTPN22  | Protein tyrosine phosphatase, non-receptor        | LYP, LYP1, LYP2, PEP, PTPN8                                                                                                                                                                                                                                                                                                                                                                                                                                                                                                                                                                                                                                                                                                                                                                                                                                                     |   |
| PTPN3   | Protein tyrosine phosphatase, non-receptor        | RP11-18A3.3, PTP-H1, PTPH1                                                                                                                                                                                                                                                                                                                                                                                                                                                                                                                                                                                                                                                                                                                                                                                                                                                      |   |
| PTPN5   | Protein tyrosine phosphatase, non-receptor type 5 | PTPSTEP, STEP                                                                                                                                                                                                                                                                                                                                                                                                                                                                                                                                                                                                                                                                                                                                                                                                                                                                   |   |
| PTPN9   | Protein tyrosine phosphatase, non-receptor        | MEG2, PTPMEG2                                                                                                                                                                                                                                                                                                                                                                                                                                                                                                                                                                                                                                                                                                                                                                                                                                                                   |   |
| PTPRB   | Protein tyrosine phosphatase, receptor type, B    | HPTP-BETA, HPTPB, PTPB, R-PTP-BETA, VEPTP                                                                                                                                                                                                                                                                                                                                                                                                                                                                                                                                                                                                                                                                                                                                                                                                                                       |   |
| PTPRC   | Protein tyrosine phosphatase, receptor type, C    | RP11-555K8.4, BZ20, CD43, CD43R, GP160, L-CA, LCA, LY5, T300                                                                                                                                                                                                                                                                                                                                                                                                                                                                                                                                                                                                                                                                                                                                                                                                                    | v |
| PTPRD   | Protein tyrosine phosphatase, receptor type, D    | HPTP, HTPD, HTPDELTA, PTPD, RPTPDELTA                                                                                                                                                                                                                                                                                                                                                                                                                                                                                                                                                                                                                                                                                                                                                                                                                                           |   |
| PTPRE   | Protein tyrosine phosphatase, receptor type, E    | RP11-380J17.1, HPTPE, PTPE, R-PTP-EPSILON                                                                                                                                                                                                                                                                                                                                                                                                                                                                                                                                                                                                                                                                                                                                                                                                                                       |   |
| PTPRJ   | Protein tyrosine phosphatase, receptor type, J    | CD148, DEP1, HPTPeta, R-PTP-ETA, SCC1                                                                                                                                                                                                                                                                                                                                                                                                                                                                                                                                                                                                                                                                                                                                                                                                                                           |   |
| PTPRN2  | Protein tyrosine phosphatase, receptor type, N2   | IA-2beta, IAR, ICAAR, PTPRP, R-PTP-N2                                                                                                                                                                                                                                                                                                                                                                                                                                                                                                                                                                                                                                                                                                                                                                                                                                           |   |
| PTPRO   | Protein tyrosine phosphatase, receptor type, O    | GLEET1, NTH50, PTP-OC, PTP-U21, PTP-U2, R-PTP-O, PTPRO                                                                                                                                                                                                                                                                                                                                                                                                                                                                                                                                                                                                                                                                                                                                                                                                                          |   |
| PTPRR   | Protein tyrosine phosphatase, receptor type, P    | EC-PTP, PCPTP1, PTP-SL, PTPBR7, PTPRQ                                                                                                                                                                                                                                                                                                                                                                                                                                                                                                                                                                                                                                                                                                                                                                                                                                           |   |
| PTPRT   | Protein tyrosine phosphatase, receptor type, T    | RP5-1121H13.2, RPTPrho                                                                                                                                                                                                                                                                                                                                                                                                                                                                                                                                                                                                                                                                                                                                                                                                                                                          |   |
| PTX3    | Pentraxin 3, long                                 | TNFAIP5, TSG-14                                                                                                                                                                                                                                                                                                                                                                                                                                                                                                                                                                                                                                                                                                                                                                                                                                                                 |   |
| PUM1    | Pumilio RNA-binding family member 1               | RP1-65J11.4, HSPUM, PUMH, PUMH1, PUML1                                                                                                                                                                                                                                                                                                                                                                                                                                                                                                                                                                                                                                                                                                                                                                                                                                          |   |
| PURB    | Purine-rich element binding protein B             | PURBETA                                                                                                                                                                                                                                                                                                                                                                                                                                                                                                                                                                                                                                                                                                                                                                                                                                                                         |   |
| PURG    | Purine-rich element binding protein G             | PURG-A-B, PURG                                                                                                                                                                                                                                                                                                                                                                                                                                                                                                                                                                                                                                                                                                                                                                                                                                                                  |   |
| PUS10   | Pseudouridylate synthase 10                       | CCDC139, DOBI                                                                                                                                                                                                                                                                                                                                                                                                                                                                                                                                                                                                                                                                                                                                                                                                                                                                   |   |
| PVR     | Poliovirus receptor                               | CD155, HVED, NECL5, Necl-5, PVS, TAGE4                                                                                                                                                                                                                                                                                                                                                                                                                                                                                                                                                                                                                                                                                                                                                                                                                                          |   |

|           |                                                      |                                              |  |
|-----------|------------------------------------------------------|----------------------------------------------|--|
| PVRL4     | Poliovirus receptor-related 4                        | EDSS1, LNIR, PRR4, nectin-4                  |  |
| PVT1      | Pvt1 oncogene (non-protein coding)                   | LINC00079, NCRNA00079                        |  |
| PWP2      | Pwp2 periodic tryptophan protein homolog (mouse)     | EHOC-17H, UTP1, PWP2                         |  |
| PWWP2A    | PWWP domain containing 2A                            | MST101                                       |  |
| PXDN      | Peroxidasin homolog (Drosophila)                     | COPOA, D2S448, D2S448E, MG50, PRG2, PXN, VPO |  |
| PXMP2     | Peroxisomal membrane protein 2, 22 kDa               | PMP22                                        |  |
| PXT1      | Peroxisomal, testis specific 1                       | STEPP                                        |  |
| PYGB      | Phosphorylase, glycogen; brain                       | RP5-965G21.1, GPBB                           |  |
| QDPR      | Quinoid dihydropteridine reductase                   | DHPR, PKU2, SDR33C1                          |  |
| QKI       | QKI, KH domain containing, RNA binding               | Hqk, QK, QK1, QK3, hqkI                      |  |
| QRSL1     | Glutaminyl-tRNA synthetase (glutamic-tyrosyl) like 1 | GatA                                         |  |
| QSER1     | Glutamine and serine rich 1                          |                                              |  |
| QSOX2     | Quiescin Q6 sulfhydryl oxidase 2                     | RP11-83N9.4, QSCN6L1, SOXN                   |  |
| QTRTD1    | Queuine tRNA-ribosyltransferase domain containing 1  |                                              |  |
| RAB10     | RAB10, member RAS oncogene family                    |                                              |  |
| RAB11A    | RAB11A, member RAS oncogene family                   | YL8                                          |  |
| RAB11FIP1 | RAB11 family interacting protein 1 (class I)         | NOEL1A, RCP, rab11-FIP1                      |  |
| RAB11FIP2 | RAB11 family interacting protein 2 (class I)         | Rab11-FIP2, nRip11                           |  |
| RAB11FIP5 | RAB11 family interacting protein 5 (class I)         | GAF1, RIP11, pp75                            |  |
| RAB12     | RAB12, member RAS oncogene family                    |                                              |  |
| RAB13     | RAB13, member RAS oncogene family                    | GIG4                                         |  |
| RAB14     | RAB14, member RAS oncogene family                    | RP11-165P4.4, FBP, RAB-14                    |  |
| RAB15     | RAB15, member RAS oncogene family                    |                                              |  |
| RAB18     | RAB18, member RAS oncogene family                    | RP11-148B2.1LI1, WARBM3, RAB18               |  |
| RAB1A     | RAB1A, member RAS oncogene family                    | RAB1, YPT1                                   |  |
| RAB1B     | RAB1B, member RAS oncogene family                    |                                              |  |
| RAB20     | RAB20, member RAS oncogene family                    |                                              |  |
| RAB21     | RAB21, member RAS oncogene family                    |                                              |  |
| RAB22A    | RAB22A, member RAS oncogene family                   |                                              |  |
| RAB23     | RAB23, member RAS oncogene family                    | RP3-496N17.3, HSPC137                        |  |
| RAB2B     | RAB2B, member RAS oncogene family                    |                                              |  |
| RAB33B    | RAB33B, member RAS oncogene family                   | SMC2                                         |  |
| RAB37     | RAB37, member RAS oncogene family                    |                                              |  |

|          |                                                                                       |                                                                |   |
|----------|---------------------------------------------------------------------------------------|----------------------------------------------------------------|---|
| RAB38    | RAB38, member RAS oncogene family                                                     | NY-MEL-1, rrGTPbp                                              |   |
| RAB39    | RAB39A, member RAS oncogene family                                                    | RAB39                                                          |   |
| RAB39B   | RAB39B, member RAS oncogene family                                                    | RP13-228J13.2, MRX72                                           |   |
| RAB3GAP1 | RAB3 GTPase activating protein subunit 1                                              | P130, RAB3GAP30, WARBM1, RAB3GAP1                              |   |
| RAB3GAP2 | RAB3 GTPase activating protein subunit 2<br>(non-catalytic)                           | RP11-308G11.1, RAB3-GAP130, RAB3GAP130,<br>SPC60, WARBM2, p150 |   |
| RAB3IL1  | RAB3A interacting protein (rabin3)-like 1                                             | GRAB                                                           |   |
| RAB3IP   | RAB3A interacting protein                                                             | RABIN3                                                         |   |
| RAB40A   | RAB40A, member RAS oncogene family                                                    |                                                                |   |
| RAB40AL  | RAB40A, member RAS oncogene family-<br>like                                           | LL0XNC01-237H1.1, MRXSMP, RAR2, RLGP                           |   |
| RAB40B   | RAB40B, member RAS oncogene family                                                    | RAR, SEC4L                                                     |   |
| RAB44    | RAB44, member RAS oncogene family                                                     | RP3-431A14.3, RASD3, RASL13, dJ431A14.3                        |   |
| RAB4A    | RAB4A, member RAS oncogene family                                                     | HRES-1, HRES-1/RAB4, HRES1, RAB4                               |   |
| RAB5A    | RAB5A, member RAS oncogene family                                                     | RAB5                                                           |   |
| RAB6A    | RAB6A, member RAS oncogene family                                                     | RAB6                                                           |   |
| RAB7L1   |                                                                                       |                                                                |   |
| RAB8B    | RAB8B, member RAS oncogene family                                                     |                                                                |   |
| RABEP1   | Rabaptin, RAB GTPase binding effector<br>protein 1                                    | RAB5EP, RABPT5                                                 |   |
| RABGAP1  | RAB GTPase activating protein 1                                                       | HSPC094, GAPCENA, TBC1D11                                      |   |
| RABGEF1  | RAB guanine nucleotide exchange factor<br>(GEF) 1                                     | RABEX5, RAP1, rabex-5                                          |   |
| RABGGTB  | Rab geranylgeranyltransferase, beta subunit                                           | RP4-682C21.3, GGTB                                             |   |
| RABL3    | RAB, member of RAS oncogene family-like<br>2                                          |                                                                |   |
| RABL5    |                                                                                       |                                                                |   |
| RAC1     | Ras-related C3 botulinum toxin substrate 1<br>(rho family, small GTP-binding protein) | MIG5, Rac-1, TC-25, p21-Rac1                                   | v |
| RACGAP1  | Rac GTPase activating protein                                                         | CYK4, HsCYK-4, ID-GAP, MgcRacGAP                               |   |
| RAD1     | RAD1 checkpoint DNA exonuclease                                                       | HRAD1, REC1                                                    |   |
| RAD17    | RAD17 homolog ( <i>S. pombe</i> )                                                     | CCYC, HRAD17, R24LSP, RAD24, RAD17                             |   |
| RAD18    | RAD18 E3 ubiquitin protein ligase                                                     | RNF73                                                          |   |
| RAD21    | RAD21 homolog ( <i>S. pombe</i> )                                                     | CDLS4, HR21, HRAD21, MCD1, NXP1, SCC1, hHR21                   | v |
| RAD23B   | RAD23 homolog B ( <i>S. cerevisiae</i> )                                              | RP11-131A5.1, HHR23B, HR23B, P58                               |   |
| RAD50    | RAD50 homolog ( <i>S. cerevisiae</i> )                                                | NBSLD2, hRad50, RAD50                                          |   |
| RAD51AP1 | RAD51 associated protein 1                                                            | PIR51                                                          |   |
| RAD51C   | RAD51 paralog C                                                                       | BROVCA3, FANCO, R51H3, RAD51L2                                 |   |
| RAD54B   | RAD54 homolog B ( <i>S. cerevisiae</i> )                                              | hCG_2009220, RDH54                                             |   |



|          |                                                               |                                                                                 |   |
|----------|---------------------------------------------------------------|---------------------------------------------------------------------------------|---|
| RADIL    | Ras association and DIL domains                               | RASIP2                                                                          |   |
| RAET1E   | Retinoic acid early transcript 1E                             | U1NQ18077, FK04303, LETA1, INZDLF4, INK02DLF2, KLF4, IL1BP4, LA250I20.7, RAET1E |   |
| RAG1     | Recombination activating gene 1                               | RAG-1, RNF74                                                                    |   |
| RAI1     | Retinoic acid induced 1                                       | SMCR, SMS                                                                       |   |
| RAI14    | Retinoic acid induced 14                                      | NORPEG, RAI13                                                                   |   |
| RALA     | v-far similar leukemia viral oncogene homolog A (ras-related) | RAL                                                                             |   |
| RALBP1   | RalA binding protein 1                                        | RIP1, RLIP1, RLIP76                                                             |   |
| RALGAPA1 | Ras GTPase activating protein, alpha subunit                  | GARNL1, GRIPE, RalGAPalpha1, TULIP1, p240                                       |   |
| RALGAPA2 | Ras GTPase activating protein, alpha subunit 2 (retrotrans)   | RP11-470C13.2, AS250, C200H174, BA287B20.1, JH1040C11, JH1040C11.4, s320        |   |
| RALGAPB  | Ras GTPase activating protein, beta subunit                   | RP5-1100H13.1, KIAA1219, RalGAPbeta                                             |   |
| RALGDS   | Ras guanine nucleotide dissociation                           | RP11-326L24.1, RGDS, RGF, RalGEF                                                | √ |
| RALGPS2  | Ras GEF with PH domain and SH3 binding motif 2                | RP4-595C2.1, dJ595C2.1                                                          |   |
| RALYL    | RALY RNA binding protein-like                                 | HNRPCL3                                                                         |   |
| RAN      | RAN, member RAS oncogene family                               | OK/SW-cl.81, ARA24, Gsp1, TC4                                                   |   |
| RANBP17  | RAN binding protein 17                                        |                                                                                 | √ |
| RANBP3   | RAN binding protein 3                                         |                                                                                 |   |
| RANBP6   | RAN binding protein 6                                         |                                                                                 |   |
| RAP1A    | RAP1A, member of RAS oncogene family                          | C21KG, G-22K, KREV-1, KREV1, RAP1, SMGP21                                       |   |
| RAP1B    | RAP1B, member of RAS oncogene family                          | OK/SW-cl.11, K-REV, RAL1B                                                       |   |
| RAP1BL   | RAP1B, member of RAS oncogene family pseudogene               | hCG_1757335                                                                     |   |
| RAP1GAP2 | RAP1 GTPase activating protein 2                              | GARNL4, RAP1GA3                                                                 |   |
| RAP1GDS1 | RAP1, GTP-GDP dissociation stimulator 1                       | GDS1, SmgGDS                                                                    | √ |
| RAP2A    | RAP2A, member of RAS oncogene family                          | RP11-128N14.2, K-REV, KREV, RAP2, RbBP-30                                       |   |
| RAPGEF2  | Rap guanine nucleotide exchange factor (GEF) 2                | CN1ASG1F, INKAFG1, PDZ-GEF1, PDZGEF1, RA-GEF, RA-GEF-1, Ras-GEF, Ras-GEF        |   |
| RAPGEF3  | Rap guanine nucleotide exchange factor (GEF) 3                | CAMP-GEFI, EPAC, EPAC1, HSU79275, bcm910                                        |   |
| RAPGEF4  | Rap guanine nucleotide exchange factor (GEF) 4                | 2, CAMP-GEFII, CGEF2, EFAC, EFAC2, EFAC2, NLL-00406                             |   |
| RAPGEF5  | Rap guanine nucleotide exchange factor (GEF) 5                | tcag7.1034, GFR, MR-GEF, REPAC                                                  |   |
| RAPH1    | Ras association (RalGDS/AF-0) and                             | ALS2CR18, ALS2CR9, LFD, FNEL-2, FNEL2, RMI01,                                   |   |
| RASA1    | RAS p21 protein activator (GTPase activating protein) 1       | CM-AVM, CM-AVM, GAF, FKWS, KASA, KASUAL, s120CAD, s120BASCAD                    |   |
| RASA4    | RAS p21 protein activator 4                                   | CAPRI, GAPL                                                                     |   |
| RASA4B   | RAS p21 protein activator 4B                                  | Chromosome 7, NC_000007.14 (102463139..102517777, complement)                   |   |
| RASAL2   | RAS protein activator like 2                                  | RP4-593C16.1, NGAP                                                              |   |
| RASGRF2  | Ras protein-specific guanine nucleotide-releasing factor 2    | GRF2, RAS-GRF2                                                                  |   |

|         |                                                                        |                                                                                            |   |
|---------|------------------------------------------------------------------------|--------------------------------------------------------------------------------------------|---|
| RASGRP3 | RABIF RAB interacting factor                                           |                                                                                            |   |
| RASGRP4 | RAS guanyl releasing protein 4                                         |                                                                                            |   |
| RASIP1  | Ras interacting protein 1                                              | RAIN                                                                                       |   |
| RASL10B | RAS-like, family 10, member B                                          | RRP17, VTS58635                                                                            |   |
| RASSF1  | Ras association (Raf/GDP/ATP-0) domain<br>family (N-terminal) member 1 | 123F2, NORE2AA, RDA32, REH3P21, RASSF1                                                     |   |
| RASSF2  | Ras association (Raf/GDP/ATP-0) domain<br>family (N-terminal) member 2 | RP4-599I11.1, CENP-34, RASFADIN                                                            |   |
| RASSF6  | Ras association (Raf/GDP/ATP-0) domain<br>family (N-terminal) member 6 |                                                                                            |   |
| RASSF8  | Ras association (Raf/GDP/ATP-0) domain<br>family (N-terminal) member 8 | C12orf2, HOJ1                                                                              |   |
| RB1     | Retinoblastoma 1                                                       | RP11-174H0.1, CSRC, TTT1K150, RD, p107-K0, pK0,<br>p110                                    | v |
| RBAK    | RB-associated KRAB zinc finger                                         | ZNF769                                                                                     |   |
| RBBP5   | Retinoblastoma binding protein 5                                       | RBQ3, SWD1                                                                                 |   |
| RBBP7   | Retinoblastoma binding protein 7                                       | RP11-716A19.5, RbAp46                                                                      |   |
| RBCK1   | RanBP1-type and C5HC4-type zinc finger<br>protein 1                    | RP3-652M4.4, C200H16, HOIL-1, HOIL1, FDMEL,<br>RBCK2, RNF54, URCE7IP2, YAP2, YAP4, ZBRAND4 |   |
| RBL2    | Retinoblastoma-like 2                                                  | P130, Rb2                                                                                  |   |
| RBM12B  | RNA binding motif protein 12B                                          | MGC:33837                                                                                  |   |
| RBM14   | RNA binding motif protein 14                                           | COAA, PSP2, SIP, SYTIP1, TMEM137                                                           |   |
| RBM17   | RNA binding motif protein 17                                           | RP11-414H17.9, SPF45                                                                       |   |
| RBM18   | RNA binding motif protein 18                                           |                                                                                            |   |
| RBM22   | RNA binding motif protein 22                                           | 199G4, Cwc2, ZC3H16, fSAP47                                                                |   |
| RBM24   | RNA binding motif protein 24                                           | RNPC6, dJ259A10.1                                                                          |   |
| RBM25   | RNA binding motif protein 25                                           | NET52, RED120, RNPC7, S164, Snu71, fSAP94                                                  |   |
| RBM26   | RNA binding motif protein 26                                           | RP11-777, ARK52, C150H10, TTT1K152, SE70-2,<br>ZC3H17                                      |   |
| RBM27   | RNA binding motif protein 27                                           | ARRS1, Psc1, ZC3H18                                                                        |   |
| RBM33   | RNA binding motif protein 33                                           | hCG_20114, PRR8                                                                            |   |
| RBM34   | RNA binding motif protein 34                                           | RP11-739C15.1                                                                              |   |
| RBM38   | RNA binding motif protein 38                                           | HSRNASEB, RNPC1, SEB4B, SEB4D, dJ800J21.2                                                  |   |
| RBM39   | RNA binding motif protein 39                                           | RP11-555C16.2, CAPER, CAPERalpha, PSAF39, HCC1,<br>RNPC2                                   |   |
| RBM41   | RNA binding motif protein 41                                           | RP13-383K5.1                                                                               |   |
| RBM43   | RNA binding motif protein 43                                           | C2orf38                                                                                    |   |
| RBM44   | RNA binding motif protein 44                                           | Gm817                                                                                      |   |
| RBM46   | RNA binding motif protein 46                                           | CT68                                                                                       |   |
| RBM47   | RNA binding motif protein 47                                           | NET18                                                                                      |   |
| RBM5    | RNA binding motif protein 5                                            | H37, G15, LUCA15, RMB5                                                                     |   |

|         |                                               |                                              |  |
|---------|-----------------------------------------------|----------------------------------------------|--|
| RBM6    | RNA binding motif protein 6                   | 3G2, DEF-3, DEF3, HLC-11, NY-LU-12, g16      |  |
| RBM8A   | RNA binding motif protein 8A                  | HSPC114, BOV-1A, BOV-1B, BOV-1C, CIDLLq21.1, |  |
| RBMS1   | RNA binding motif, single stranded            | CEL112, HCC-4, MSS1, MSS1-1, MSS1-2, MSS1-3, |  |
| RBMS2   | RNA binding motif, single stranded            | SCR2, YC1                                    |  |
| RBMS3   | RNA binding motif, single stranded            | SCR3                                         |  |
| RBMX    | RNA binding motif protein, X-linked           | RP11-1114A3.1, HINK1C, HINK1C1, RDMAN1,      |  |
| RBMXL1  | RNA binding motif protein, X-linked-like 1    | RPMY, h-RND, C, RPMY                         |  |
| RBMY2FP | RNA binding motif protein, Y-linked           | RP4-531M19.2, RBM1                           |  |
| RBPJ    | RNA binding protein with multiple splicing    | AGS3, CBT1, TOKJKB, TOKJKB1, KBT2, KBT-JK,   |  |
| RBPM5   | RNA binding protein with multiple splicing    | DDSLH, SHL, and RBDI                         |  |
| RBPM2   | RNA binding protein with multiple splicing    | HERMES                                       |  |
| RC3H1   | Ring finger and CCCH-type domains 1           | 5730557L09Rik, Gm551, N28103, mKIAA2025      |  |
| RCAN1   | Regulator of calcineurin 1                    | ADAPT78, CSP1, DSC1, DSCR1, MCIP1, RCN1      |  |
| RCBTB2  | Regulator of chromosome condensation          | CHC1L, RLG                                   |  |
| RCC2    | Regulator of chromosome condensation 2        | TD-60                                        |  |
| RCHY1   | Ring finger and C1H1 zinc finger domain       | AKN1, CHMP, FIK12, FKBP90, KNP199, ZCH1,     |  |
| RCL1    | RNA terminal phosphate cyclase-like 1         | ZNF262                                       |  |
| RCN1    | Retenitocarin 1, EF-hand calcium binding      | RP11-125K10.1, RNAC, RPCL1                   |  |
| RCN2    | Retenitocarin 2, EF-hand calcium binding      | HEL-S-84, PIG20, RCAL, RCN                   |  |
| RCOR1   | REST corepressor 1                            | E6BP, ERC-55, ERC55, TCBP49                  |  |
| RCOR3   | REST corepressor 3                            | COREST, RCOR                                 |  |
| RCSD1   | RCSD domain containing 1                      | RP11-318L16.1                                |  |
| RD3     | RCSD domain containing 1                      | RP3-503M14.1, CAPZIP, MK2S4                  |  |
| RDH10   | Retinal degeneration 3                        | C1orf36, LCA12                               |  |
| RDH11   | Retinol dehydrogenase 10 (all-trans)          | UNQ9375/PRO34191, SDR16C4                    |  |
| RDH12   | Retinol dehydrogenase 12 (all-trans/9-cis/11- | LCA13, LCA3, RP53, SDR7C2                    |  |
| RDX     | Radixin                                       | DFNB24                                       |  |
| REC8    | REC8 meiotic recombination protein            | HR21spBL1, Rec8p, REC8                       |  |
| RECK    | Reversion-inducing-cysteine-rich protein      | ST15                                         |  |
| RECQL   | with loop motifs                              | RECQL1, RecQ1                                |  |
| RECQL5  | RecQ helicase-like                            | RECQ5                                        |  |
| REEP1   | RecQ protein-like 5                           | C2orf23, HMN5B, SPG31                        |  |
| REEP3   | Receptor accessory protein 1                  | RP11-439F7.1, C10orf74                       |  |
| REEP5   | Receptor accessory protein 3                  | C5orf18, D5S346, DP1, TB2, YOP1              |  |
|         | Receptor accessory protein 5                  |                                              |  |

|         |                                                                                  |                                       |  |
|---------|----------------------------------------------------------------------------------|---------------------------------------|--|
| REG4    | Regenerating islet-derived family, member 4                                      | RP5-1042I8.1, GISP, REG-IV, RELP      |  |
| RELT    | RELT tumor necrosis factor receptor                                              | TNFRSF19L, TRLT                       |  |
| REPIN1  | Replication initiator 1                                                          | AP4, RIP60, ZNF464, Zfp464            |  |
| REPS2   | KALBP1 associated Eps domain containing<br>Arginine-glutamic acid dipeptide (RE) | RP11-2K15.3, POB1                     |  |
| RERE    | Retinyl saturase (all-trans-retinol 13,14-<br>reductase)                         | RP11-141M15.2, ARG, ARP, ATN1L, DNB1  |  |
| RETSAT  |                                                                                  | UNQ439/PRO872                         |  |
| REV1    | REV1, polymerase (DNA directed)                                                  | REV1L                                 |  |
| RFC1    | Replication factor C (activator 1) 1, 145 kDa                                    | A1, MHCBFB, PO-GA, RECC1, RFC40, RFC1 |  |
| RFC3    | Replication factor C (activator 1) 3, 38 kDa                                     | RFC38                                 |  |
| RFK     | Riboflavin kinase                                                                | RP11-422N19.2, RIFK                   |  |
| RFTN1   | Raftlin, lipid raft linker 1                                                     | MIG2, PIB10, PIG9, RAFTLIN            |  |
| RFTN2   | Raftlin family member 2                                                          | C2orf11, Raftlin-2                    |  |
| RFX2    | Regulatory factor X, 2 (influences HLA class<br>II expression)                   |                                       |  |
| RFX3    | Regulatory factor X, 3 (influences HLA class<br>II expression)                   | RP11-32F11.1                          |  |
| RFX4    | Regulatory factor X, 4 (influences HLA class<br>II expression)                   | NYD-SP10                              |  |
| RFX7    | Regulatory factor X, 7                                                           | RFXDC2                                |  |
| RG9MTD1 |                                                                                  |                                       |  |
| RG9MTD2 |                                                                                  |                                       |  |
| RGL1    | Ran guanine nucleotide dissociation<br>inhibitor 1                               | RP11-498P10.1, RGL                    |  |
| RGMA    | Repulsive guidance molecule family member<br>1                                   | RGM                                   |  |
| RGMB    | Repulsive guidance molecule family member<br>2                                   | DRAGON                                |  |
| RGNEF   | Ran guanine nucleotide exchange factor<br>(GDP)                                  | RGNEF, RIP2, p190RHOGEF               |  |
| RGPD1   | KALBP1 2-like and GDI domain containing<br>1                                     | RGP1, RGPD2, RanBP2L2                 |  |
| RGPD2   | KALBP1 2-like and GDI domain containing<br>2                                     | NUP358, RANBP2L2, RGP2                |  |
| RGPD3   | KALBP1 2-like and GDI domain containing<br>3                                     | RGP3                                  |  |
| RGPD5   | KALBP1 2-like and GDI domain containing<br>5                                     | BS-63, BS63, HEL161, RGP5             |  |
| RGPD6   | KALBP1 2-like and GDI domain containing<br>6                                     | RGP6, RGPD7, RanBP2L1, RanBP2L2       |  |
| RGPD8   | KALBP1 2-like and GDI domain containing<br>8                                     | RANBP2L1, RGP8, RanBP2alpha           |  |
| RGS1    | Regulator of G-protein signaling 1                                               | 1R20, BL34, HEL-S-87, IER1, IR20      |  |
| RGS12   | Regulator of G-protein signaling 12                                              | RP11-529E10.1                         |  |
| RGS13   | Regulator of G-protein signaling 13                                              | RP11-92K2.1                           |  |
| RGS16   | Regulator of G-protein signaling 16                                              | A28-RGS14, A28-RGS14P, RGS-R          |  |
| RGS18   | Regulator of G-protein signaling 18                                              | RP11-142L4.1, RGS13                   |  |

|         |                                                          |                                                                           |  |
|---------|----------------------------------------------------------|---------------------------------------------------------------------------|--|
| RGS2    | Regulator of G-protein signaling 2                       | GIG31, G0S8                                                               |  |
| RGS21   | Regulator of G-protein signaling 21                      |                                                                           |  |
| RGS22   | Regulator of G-protein signaling 22                      | CT145, PRTD-NY2                                                           |  |
| RGS3    | Regulator of G-protein signaling 3                       | RP11-168K11.4, C2PA, RGP3                                                 |  |
| RGS5    | Regulator of G-protein signaling 5                       | RP11-207N12.5, MST092, MST100, MST129, MSTP022, MSTP092, MSTP106, MSTP129 |  |
| RGS6    | Regulator of G-protein signaling 6                       | GAP                                                                       |  |
| RGS9BP  | Regulator of G-protein signaling 9 binding protein       | PERRS, R9AP, RGS9                                                         |  |
| RHBDD1  | Rhomboid domain containing 1                             | HSD50, RRP4                                                               |  |
| RHBDL3  | Rhomboid, veinlet-like 3 (Drosophila)                    | RHBDL4, VRHO                                                              |  |
| RHOB    | Ras homolog family member B                              | ARH6, ARHB, MST081, MSTP081, RHOH6                                        |  |
| RHOBTB1 | Rho-related BTB domain containing 1                      |                                                                           |  |
| RHOBTB2 | Rho-related BTB domain containing 2                      | DBC2                                                                      |  |
| RHOBTB3 | Rho-related BTB domain containing 3                      |                                                                           |  |
| RHOG    | Ras homolog family member G                              | ARHG                                                                      |  |
| RHOQ    | Ras homolog family member Q                              | ARHQ, HEL-S-42, RASL7A, TC10, TC10A                                       |  |
| RHOT1   | Ras homolog family member T1                             | ARHT1, MIRO-1, MIRO1                                                      |  |
| RHOU    | Ras homolog family member U                              | SB128, ARHU, CDC42L1, G28K, WRCH1, hG28K                                  |  |
| RIC3    | RIC3 acetylcholine receptor chaperone                    | UNQ720/PRO1385, AYST720, PRO1385                                          |  |
| RIC8A   | RIC8 guanine nucleotide exchange factor A                | RIC8                                                                      |  |
| RIC8B   | RIC8 guanine nucleotide exchange factor B                | RIC8, hSyn                                                                |  |
| RICTOR  | RICTOR independent companion of mTOR, complex 2          | AVO3, PIA, hAVO3                                                          |  |
| RIF1    | Replication timing regulatory factor 1                   |                                                                           |  |
| RILPL1  | Rab interacting lysosomal protein-like 1                 | GOSPEL, RLP1                                                              |  |
| RIMKLA  | lysosomal modification protein rimk-like family member A |                                                                           |  |
| RIMKLB  | lysosomal modification protein rimk-like family member B | FAM80B, NAAGS, NAAGS-I                                                    |  |
| RIMS1   | Regulating synaptic membrane exocytosis 1                | RP5-1046G13.1, CORD7, RAB3IP2, RIM, RIM1                                  |  |
| RIMS2   | Regulating synaptic membrane exocytosis 2                | OBOE, RAB3IP3, RIM2                                                       |  |
| RIMS3   | Regulating synaptic membrane exocytosis 3                | RP4-739H11.2, NIM3, RIM3                                                  |  |
| RIMS4   | Regulating synaptic membrane exocytosis 4                | C200H190, RIM4, RIM4, RIM4, RIM4-gamma, RIM4-omega                        |  |
| RIN2    | Ras and Rab interactor 2                                 | RP1-122P22.2, MACS, RASSF4                                                |  |
| RINL    | Ras and Rab interactor-like                              |                                                                           |  |
| RIOK2   | RIO kinase 2                                             | RIO2                                                                      |  |
| RIOK3   | RIO kinase 3                                             | SUDD                                                                      |  |

|         |                                                                               |                                                  |  |
|---------|-------------------------------------------------------------------------------|--------------------------------------------------|--|
| RIT1    | Ras-like without CAAX 1                                                       | RP11-101O6.4, NS8, RIBB, RIT, ROC1               |  |
| RLBP1   | Retinaldehyde binding protein 1                                               | CRALBP                                           |  |
| RLF     | Rearranged L-myc fusion                                                       | RP1-39G22.1, ZN-15L, ZNF292L                     |  |
| RLIM    | Ring finger protein, LIM domain interacting                                   | CTD-2530H13.3, NY-REN-43, RNF12                  |  |
| RMI1    | RecQ mediated genome instability 1<br>required for meiotic nuclear division 5 | RP11-346I8.1, BLAP75, C9orf76, FAAP75            |  |
| RMND5A  | Rhabdomyosarcoma 2 associated transcript                                      | CTLH, GID2, GID2A, RMD5, p44CTLH                 |  |
| RMST    | Ribonuclease, kinase A family, 9 (non-ribonuclease)                           | LINC00054, NCRMS, NCRNA00054                     |  |
| RNASE9  | Ribonuclease L (2,5'-oligoadenylate synthetase dependent)                     | HEL128, RAK1, h461                               |  |
| RNASEL  | Ribonuclease L (2,5'-oligoadenylate synthetase dependent)                     | RP11-20H6.1, PRCA1, RNS4                         |  |
| RNASEN  | Drosha, ribonuclease type III                                                 | ETOH12, HSAZ42770, KANSE3L, KNS, RNASE3L, RNASEN |  |
| RNASET2 | Ribonuclease T2                                                               | RP11-514O12.3, RNASE6PL, bA514O12.3              |  |
| RNF10   | Ring finger protein 10                                                        | RIE2                                             |  |
| RNF103  | Ring finger protein 103                                                       | HKF-1, KF-1, KF1, ZFP-103, ZFP103                |  |
| RNF11   | Ring finger protein 11                                                        | CGI-123, SID1669                                 |  |
| RNF114  | Ring finger protein 114                                                       | PSORS12, ZNF313                                  |  |
| RNF115  | Ring finger protein 115                                                       | BCA2, ZNF364                                     |  |
| RNF125  | Ring finger protein 125, E3 ubiquitin protein ligase                          | TRAC-1, TRAC1                                    |  |
| RNF128  | Ring finger protein 128, E3 ubiquitin protein ligase                          | RP11-150F24.1, GRAIL                             |  |
| RNF13   | Ring finger protein 13                                                        | RZF                                              |  |
| RNF14   | Ring finger protein 14                                                        | HRIHFB2038, ARA54, HFB30, TRIAD2                 |  |
| RNF141  | Ring finger protein 141                                                       | ZFP26, ZNF230                                    |  |
| RNF144A | Ring finger protein 144A                                                      | RNF144, UBCE7IP4                                 |  |
| RNF144B | Ring finger protein 144B                                                      | IBRDC2, PIR2, bA528A10.3, p53RFP                 |  |
| RNF145  | Ring finger protein 145                                                       |                                                  |  |
| RNF146  | Ring finger protein 146                                                       | RP3-351K20.1, dJ351K20.1                         |  |
| RNF157  | Ring finger protein 157                                                       |                                                  |  |
| RNF160  |                                                                               |                                                  |  |
| RNF165  | Ring finger protein 165                                                       | ARKL2, RNF111L2                                  |  |
| RNF168  | Ring finger protein 168, E3 ubiquitin protein ligase                          | hRNF168                                          |  |
| RNF169  | Ring finger protein 169                                                       |                                                  |  |
| RNF17   | Ring finger protein 17                                                        | RP11-756A22.1, Mmip-2, SPATA23, TDRD4            |  |
| RNF170  | Ring finger protein 170                                                       | ADSA, SNAX1                                      |  |
| RNF182  | Ring finger protein 182                                                       |                                                  |  |

|         |                                                                                             |                                                             |   |
|---------|---------------------------------------------------------------------------------------------|-------------------------------------------------------------|---|
| RNF183  | Ring finger protein 183                                                                     |                                                             |   |
| RNF19A  | Ring finger protein 19A, RNF19A ubiquitin protein ligase                                    | RNF19                                                       |   |
| RNF19B  | Ring finger protein 19B                                                                     | IBRDC3, NKLAM                                               |   |
| RNF2    | Ring finger protein 2                                                                       | USP-120K12.1, DAF-1, DAF1, DING, HUP15, KING1B, RING2       |   |
| RNF20   | Ring finger protein 20, E3 ubiquitin protein ligase                                         | BRE1, BRE1A, hBRE1                                          |   |
| RNF212  | Ring finger protein 212                                                                     | ZHP3                                                        |   |
| RNF213  | Ring finger protein 213                                                                     | hCG_1812857, ALO17, C17orf27, KIAA1618, MYMY2, MYSTR, NET57 |   |
| RNF216L | Ring finger protein 213                                                                     | hCG_1812857, ALO17, C17orf27, KIAA1618, MYMY2, MYSTR, NET57 |   |
| RNF219  | Ring finger protein 219                                                                     | C13orf7                                                     |   |
| RNF24   | Ring finger protein 24                                                                      | GIL                                                         |   |
| RNF32   | Ring finger protein 32                                                                      | tcag7.575, FKSG33, HSD15, LMBR2                             |   |
| RNF34   | Ring finger protein 34, E3 ubiquitin protein ligase                                         | CARP-1, CARP1, RFI, RIF, RIFF, hRFI                         |   |
| RNF38   | Ring finger protein 38                                                                      | RP11-84P7.4                                                 |   |
| RNF4    | Ring finger protein 4                                                                       | RES4-26, SLX5, SNURF                                        |   |
| RNF40   | Ring finger protein 40, E3 ubiquitin protein ligase                                         | BRE1B, RBP95, STARING                                       |   |
| RNF43   | Ring finger protein 43                                                                      | RNF124, URCC                                                | √ |
| RNF5P1  | Ring finger protein 5, E3 ubiquitin protein ligase                                          |                                                             |   |
| RNF6    | Ring finger protein (C3H2C3 type) 6                                                         | RP11-380N8.5                                                |   |
| RNF7    | Ring finger protein 7                                                                       | CKBBP1, ROC2, SAG                                           |   |
| RNF8    | Ring finger protein 8, E3 ubiquitin protein ligase                                          | hRNF8                                                       |   |
| RNFT1   | Ring finger protein, transmembrane 1                                                        | PTD016                                                      |   |
| RNFT2   | Ring finger protein, transmembrane 2                                                        | UNQ514, TMEM118                                             |   |
| RNLS    | Renalase, FAD-dependent amine oxidase                                                       | C10orf59, RENALASE                                          |   |
| RNMT    | RNA (guanine-7-) methyltransferase                                                          | MET, RG7MT1, hCMT1c                                         |   |
| RNPC3   | RNA-binding region (RNP1, RNM1)                                                             | RBM40, RNP, SNRNP65                                         |   |
| ROBO2   | Roundabout?, axon guidance receptor, kno-associated, conlcr-con containing protein ligase 1 | SAX3                                                        |   |
| ROCK1   |                                                                                             | P160ROCK, ROCK-I                                            |   |
| ROD1    |                                                                                             |                                                             |   |
| ROR2    |                                                                                             |                                                             |   |
| RORA    | RAR-related orphan receptor A                                                               | NR1F1, ROR1, ROR2, ROR3, RZR-ALPHA, RZRA                    |   |
| RORB    | RAR-related orphan receptor B                                                               | NR1F2, ROR-BETA, RZR-BETA, RZRB, bA133M9.1                  |   |
| RP2     | Retinitis pigmentosa 2 (X-linked recessive)                                                 | DELXp11.3, NM23-H10, NME10, TBCCD2, XRP2                    |   |
| RP9     | Retinitis pigmentosa 9 (autosomal dominant)                                                 | PAP-1, PAPI                                                 |   |

|          |                                                    |                                                                                      |   |
|----------|----------------------------------------------------|--------------------------------------------------------------------------------------|---|
| RPA1     | Replication protein A1, 70 kDa                     | HSSB, MST075, REPA1, RF-A, RP-A, RPA70                                               |   |
| RPAP2    | RNA polymerase II associated protein 2             | C1orf82                                                                              |   |
| RPAP3    | RNA polymerase II associated protein 3             |                                                                                      |   |
| RPE65    | Retinal pigment epithelium-specific protein 65 kDa | BCO3, LCA2, RP20, mRPE65, rd12, sRPE65                                               |   |
| RPGR     | Retinitis pigmentosa GTPase regulator              | COD1, CORDA1, CRD, FCDA, RPT3, RPS, ALK13, RPL15                                     |   |
| RPGRIP1L | RPGRIP1-like                                       | CORS3, FTM, JBTS7, MKS5, NPHP8, PPP1R134                                             |   |
| RPH3A    | Rabphilin 3A                                       |                                                                                      |   |
| RPIA     | Ribose 5-phosphate isomerase A                     | RPI                                                                                  |   |
| RPL11    | Ribosomal protein L11                              | RP11-223J15.3, DBA7, GIG34, L11                                                      |   |
| RPL13A   | Ribosomal protein L13a                             | L13A, TSTA1                                                                          |   |
| RPL13AP3 | Ribosomal protein L13a pseudogene 3                | RPL13A_11_1370                                                                       |   |
| RPL15    | Ribosomal protein L15                              | FCDA10781, DBA12, EC45, E15, NPL10, NPL110, RPL10                                    |   |
| RPL26L1  | Ribosomal protein L26-like 1                       | RPL26P1                                                                              |   |
| RPL27A   | Ribosomal protein L27a                             | L27A                                                                                 |   |
| RPL28    | Ribosomal protein L28                              | L28                                                                                  |   |
| RPL3     | Ribosomal protein L3                               | OK/SW-cl.32, ASC-1, L3, TARBP-B                                                      |   |
| RPL32    | Ribosomal protein L32                              | PP9932, L32                                                                          |   |
| RPL36A   | Ribosomal protein L36a                             | RP1-164F3.1, L36A, L44L, MIG6, RPL44                                                 |   |
| RPL37    | Ribosomal protein L37                              | L37                                                                                  |   |
| RPL4     | Ribosomal protein L4                               | L4                                                                                   |   |
| RPL5     | Ribosomal protein L5                               | MSTP030, DBA6, L5, PPP1R135                                                          | v |
| RPN2     | Ribophorin II                                      | RP3-343K2.2, RIBIIR, RPN-II, RPNII, SWP1                                             |   |
| RPP30    | Ribonuclease P/MRP 30 kDa subunit                  | RP11-320F15.1, TSG15                                                                 |   |
| RPRD1A   | regulation of nuclear pre-mRNA domain              | HsT3101, P15RS                                                                       |   |
| RPRD1B   | regulation of nuclear pre-mRNA domain              | RPS-1057B20.2, C200H177, CREP1, NET00, H1057B20.2                                    |   |
| RPRD2    | regulation of nuclear pre-mRNA domain containing 2 | HSPC099, KIAA0460                                                                    |   |
| RPRML    | Reprimo-like                                       |                                                                                      |   |
| RPS23    | Ribosomal protein S23                              | S23                                                                                  |   |
| RPS27A   | Ribosomal protein S27a                             | CEP80, HELTZ, SZ7A, UBA80, UBC, UBCEP1, UBCEP80                                      |   |
| RPS29    | Ribosomal protein S29                              | DBA13, S29                                                                           |   |
| RPS6KA3  | ribosomal protein S6 kinase, 90 kDa,               | RP11-595H10.3, CLS, HUC-3, ISPK-1, MAPKAPKB, MBX10, RSK, RSK2, SGK, S6K1, S6K2, S6K3 |   |
| RPS6KA5  | ribosomal protein S6 kinase, 90 kDa,               | MSK1, MSPK1, RLPK                                                                    |   |
| RPS6KB1  | ribosomal protein S6 kinase, 70 kDa,               | FSOK, SOK, SOK-beta-1, SOK1, STK14A, p70 SOKA, S6K1, S6K2, S6K3                      |   |



|         |                                                                            |                                                                                   |   |
|---------|----------------------------------------------------------------------------|-----------------------------------------------------------------------------------|---|
| RPS6KC1 | Ribosomal protein S6 kinase, 52 kDa, calcium-activated                     | RPK118, RSKL1, S6K-delta-1, S6PKh1, humS6PKh1                                     |   |
| RPS7    | Ribosomal protein S7                                                       | DBA8, S7                                                                          |   |
| RPSA    | Ribosomal protein SA                                                       | S7LKT, S7LK, ICAS, LAMBK, LAMKI, LDI, LDI/p40, LDD, LDDA, NEM/ICUD4, SA, LmP, p40 |   |
| RPTN    | Repetin                                                                    | RP11-107M16.6                                                                     |   |
| RPTOR   | Regulatory associated protein of mTOR,                                     | KOG1, Mip1                                                                        |   |
| RPUSD4  | RNA pseudouridyate synthase domain containing 4                            |                                                                                   |   |
| RRAGA   | Ras-related GTP binding A                                                  | FIP-1, FIP1, RAGA                                                                 |   |
| RRAGB   | Ras-related GTP binding B                                                  | RP11-465E19.1, RAGB, bA465E19.1                                                   |   |
| RRAGD   | Ras-related GTP binding D                                                  | RAGD, bA11D8.2.1                                                                  |   |
| RREB1   | Ras responsive element binding protein 1                                   | RP11-69L16.1, FINB, HNT, LZ321, RREB-1, Zep-1                                     |   |
| RRM1    | Ribonucleotide reductase M1                                                | R1, RIR1, RR1                                                                     |   |
| RRM2B   | Ribonucleotide reductase M2 B (H35 kDa) (hly)                              | MTDPS8A, MTDPS8B, P53R2                                                           |   |
| RRN3P2  | RNA polymerase II transcription factor                                     |                                                                                   |   |
| RRP12   | Ribosomal RNA processing 12 homolog (S. cerevisiae)                        | RP11-452K12.13-007, KIAA0690                                                      |   |
| RRP15   | Ribosomal RNA processing 15 homolog (S. cerevisiae)                        | CGI-115, KIAA0507                                                                 |   |
| RRP1B   | Ribosomal RNA processing 1B                                                | KIAA0179, NNP1L, Nnp1, PPP1R136, RRP1                                             |   |
| RSAD2   | Radical S-adenosyl methionine domain containing 2                          | 2510004L01Rik, cig33, cig5, vig1                                                  |   |
| RSBN1   | Round spermatid basic protein 1                                            | RP11-324J2.1, ROSBIN                                                              |   |
| RSL1D1  | Ribosomal L1 domain containing 1                                           | L12, CSIG, PBK1, UTP30                                                            |   |
| RSPH3   | Radial spoke 3 homolog (Chlamydomonas)                                     | RSHL2, RSP3, dJ111C20.1                                                           |   |
| RSPO2   | R-spondin 2                                                                | UNQ9384/PRO34209, CRISTIN2                                                        |   |
| RSRC1   | Arginine/serine-rich coiled-coil 1                                         | BM-011, SFRS21, SRrp53                                                            |   |
| RSU1    | Ras suppressor protein 1                                                   | RSP-1                                                                             |   |
| RTBDN   | Retbindin                                                                  |                                                                                   |   |
| RTEL1   | Regulator of telomere elongation helicase 1                                | RP4-583P15.2, C20orf41, DKCA4, DKCB5, NHL, RTEL                                   |   |
| RTF1    | Rtt1, Part of RNA polymerase II complex component, homolog (S. cerevisiae) | GTL7, KIAA0252                                                                    |   |
| RTKN2   | Rhotekin 2                                                                 | RP11-531F24.1, PLEKHK1, bA531F24.1                                                |   |
| RTN1    | Reticulon 1                                                                | NSP                                                                               |   |
| RTN3    | Reticulon 3                                                                | ASYIP, HAP, NSPL2, NSPLII-A1, RTN3                                                |   |
| RUFY2   | RUN and FYVE domain containing 2                                           | RP11-153K11.2, RABIP4R, ZFYVE13                                                   |   |
| RUFY3   | RUN and FYVE domain containing 3                                           | RIPX, SINGAR1                                                                     |   |
| RUNDC2A | RUN and FYVE domain containing 3                                           | RIPX, SINGAR1                                                                     | v |
| RUNDC3B | RUN domain containing 3B                                                   | RPIB9, RPIP9                                                                      |   |

|         |                                                                             |                                                                                     |   |
|---------|-----------------------------------------------------------------------------|-------------------------------------------------------------------------------------|---|
| RUNX1   | Runt-related transcription factor 1                                         | AME1, AML1-EV1F1, AMLECK1, CBFA2, EVF1, DEBP2-B                                     | √ |
| RUNX1T1 | Runt-related transcription factor 1, <i>translocated to 1 (AML1-Delta1)</i> | AML1T1, CBFA2T1, CDR, ETO, MTG8, ZMYND2                                             |   |
| RUNX2   | Runt-related transcription factor 2                                         | RFT-100H4.1, AML2, CBF-alpha-1, CBFAT, CCD, CCD1, CLCD, OSE2, OSE2, REA2-A, DEBP2-A |   |
| RUSC1   | RUN and SH3 domain containing 1                                             | RP11-21N7.4, NESCA                                                                  |   |
| RUVBL2  | RuvB-like AAA ATPase 2                                                      | CGI-40, ECF51, INO80J, KLF11N, KVD2, TH12, TH40, TID40B                             |   |
| RWDD2B  | RWD domain containing 2B                                                    | GL011, C21orf6                                                                      |   |
| RWDD3   | RWD domain containing 3                                                     | RSUME                                                                               |   |
| RXRA    | Retinoid X receptor, alpha                                                  | NR2B1                                                                               |   |
| RYR3    | Ryanodine receptor 3                                                        | RYR-3                                                                               |   |
| S100BPB | S100P binding protein                                                       | S100PBPR                                                                            |   |
| S100Z   | S100 calcium binding protein Z                                              | Gm625, S100-zeta                                                                    |   |
| S1PR1   | Sphingosine-1-phosphate receptor 1                                          | CD303, CHELG1, D15502, ECG1, EDG-1, EDG1, S1P1                                      |   |
| S1PR2   | Sphingosine-1-phosphate receptor 2                                          | AGR16, EDG-5, EDG5, Gpcr13, H218, LPB2, S1P2                                        |   |
| S1PR3   | Sphingosine-1-phosphate receptor 3                                          | EDG-3, EDG3, LPB3, S1P3                                                             |   |
| SACMIL  | SAC1 suppressor of actin mutations 1-like <i>(mouse)</i>                    | SAC1                                                                                |   |
| SACS    | sacsin molecular chaperone                                                  | ARSACS, DNAJC29, PPP1R138, SPAX6                                                    |   |
| SAE1    | SUMO1 activating enzyme subunit 1                                           | AOS1, HSPC140, SUA1, UBLE1A                                                         |   |
| SALL2   | Spalt-like transcription factor 2                                           | HSAL2, Sal-2, ZNF795, p150(Sal2)                                                    |   |
| SAMD12  | Sterile alpha motif domain containing 12                                    |                                                                                     |   |
| SAMD3   | Sterile alpha motif domain containing 3                                     | RP11-73O6.2                                                                         |   |
| SAMD4A  | Sterile alpha motif domain containing 4A                                    | SAMD4, SMAUG, SMAUG1, SMG, SMGA                                                     |   |
| SAMD4B  | Sterile alpha motif domain containing 4B                                    | SMGB, hSmaug2                                                                       |   |
| SAMD5   | Sterile alpha motif domain containing 5                                     | RP5-875H10.1, dJ875H10.1                                                            |   |
| SAMD8   | Sterile alpha motif domain containing 5                                     | RP5-875H10.1, dJ875H10.1                                                            |   |
| SAMD9   | Sterile alpha motif domain containing 9                                     | C7orf5, DRIF1, NFTC, OEF1, OEF2                                                     |   |
| SAMD9L  | Sterile alpha motif domain containing 9-like                                | C7orf6, DRIF2, UEF1                                                                 |   |
| SAMHD1  | SAM domain and HD domain 1                                                  | RP1-132F21.1, CHBL2, DCIP, HDDC1, MOP-5, SBB188                                     |   |
| SAP30BP | SAP30 binding protein                                                       | HCNGP, HTRG, HTRP                                                                   |   |
| SAP30L  | SAP30-like                                                                  | NS4ATP2                                                                             |   |
| SAPS3   |                                                                             |                                                                                     |   |
| SAR1A   | Secretion associated, Ras related GTPase 1A                                 | RP11-367H5.4, SAR1, SARA1, Sara, masra2                                             |   |
| SAR1B   | Secretion associated, Ras related GTPase 1B                                 | ANDD, CMRD, GTBPB, SARA2                                                            |   |
| SARM1   | Sterile alpha and TIR motif containing 1                                    | MyD88-5, SAMD2, SARM                                                                |   |

|         |                                                |                                                                    |  |
|---------|------------------------------------------------|--------------------------------------------------------------------|--|
| SARNP   | SAP domain containing ribonucleoprotein        | CIP29, HCC1, HSPC316, THO1                                         |  |
| SARS2   | Seryl-tRNA synthetase 2, mitochondrial         | SARS, SARSM, SERS, SYS, SerRS, SerRSmt, mtSerRS                    |  |
| SASH1   | SAM and SH3 domain containing 1                | RP3-323M4.1, SH3D6A, dJ323M4, dJ323M4.1                            |  |
| SAV1    | Salvador family WW domain containing protein 1 | SAV, WW45, WWP4                                                    |  |
| SBF2    | SET binding factor 2                           | CMT4B2, DENND7B, MTMR13                                            |  |
| SBK1    | SH3 domain binding kinase 1                    | SBK                                                                |  |
| SC5DL   |                                                |                                                                    |  |
| SCAI    | Suppressor of cancer cell invasion             | C9orf126, NET40                                                    |  |
| SCAMP1  | Secretory carrier membrane protein 1           | SCAMP, SCAMP37                                                     |  |
| SCAMP2  | Secretory carrier membrane protein 2           |                                                                    |  |
| SCAND2  | SCAN domain containing 2 pseudogene            | SCAND2                                                             |  |
| SCAND3  |                                                |                                                                    |  |
| SCAPER  | S-phase cyclin A-associated protein in the ER  | MSTP063, ZNF291, Zfp291                                            |  |
| SCARA5  | Scavenger receptor class A, member 5           | UNQ2938/PRO28700, NET33, Tesr                                      |  |
| SCARB2  | Scavenger receptor class B, member 2           | AMRN1, CD30L2, EFM4, HEGF83, LGF83, LIMF-2, LIMF1, CD, RH          |  |
| SCARF1  | Scavenger receptor class F, member 1           | SREC, SREC-I, SREC1                                                |  |
| SCARNA5 | small Cajal body-specific RNA 5                |                                                                    |  |
| SCD     | Stearoyl-CoA desaturase (delta-9-desaturase)   | PRO1933, FADS5, MSTP0081, SCDOS, SCD                               |  |
| SCD5    | Stearoyl-CoA desaturase 5                      | ACOD4, FADS4, HSCD5, SCD2, SCD4                                    |  |
| SCFD1   | Sec1 family domain containing 1                | FKSG23, C14orf163, RA410, SLY1, SLY1P, STXBP1L2                    |  |
| SCG5    | Secretogranin V (7B2 protein)                  | 7B2, P7B2, SGNE1, SgV                                              |  |
| SCGB1D1 | Secretoglobin, family 1D, member 1             | LIPA, LPHA, LPNA                                                   |  |
| SCGB1D2 | Secretoglobin, family 1D, member 2             | LIPB, LPHB, LPNB                                                   |  |
| SCHIP1  | Schwannomin interacting protein 1              | SCHIP-1                                                            |  |
| SCLT1   | Sodium channel and clathrin linker 1           | CAP-1A, CAP1A                                                      |  |
| SCLY    | Selenocysteine lyase                           | SCL, hSCL                                                          |  |
| SCML1   | Sex comb on midleg-like 1 (Drosophila)         | RP3-389A20.1                                                       |  |
| SCML2   | Sex comb on midleg-like 2 (Drosophila)         | RP5-1129A6.3                                                       |  |
| SCML4   | Sex comb on midleg-like 4 (Drosophila)         | RP1-47M23.1, dJ47M23.1                                             |  |
| SCN11A  | Sodium channel, voltage-gated, type XI,        | FEPS3, HSAN7, NAV1.9, NaN, PN5, SCN12A, SNS-2                      |  |
| SCN1A   | Sodium channel, voltage-gated, type I, alpha   | ELILE0, FEBS, FEBSA, FHM5, GEFSP2, HBSCL, NACT, Nav1.1, SCN1, SMEL |  |
| SCN1B   | Sodium channel, voltage-gated, type I, beta    | ATFB13, BRGDA5, GEFSP1                                             |  |
| SCN2B   | Sodium channel, voltage-gated, type II, beta   | UNQ326/PRO386, ATFB14                                              |  |

|         |                                               |                                                 |   |
|---------|-----------------------------------------------|-------------------------------------------------|---|
| SCN3A   | Sodium channel, voltage-gated, type III,      | NAC3, Nav1.3                                    |   |
| SCN3B   | Sodium channel, voltage-gated, type III, beta | ATFB16, BRGDA7, HSA243396, SCNB3                |   |
| SCN4A   | Sodium channel, voltage-gated, type IV,       | HOKM12, HTRNF, HTRF, NACTA, Na(v)1.4, Nav1.4,   |   |
| SCN4B   | Sodium channel, voltage-gated, type IV, beta  | SLM1                                            |   |
| SCN8A   | Sodium channel, voltage-gated, type VIII,     | ATFB17, LQT10, Navbeta4                         |   |
| SCN9A   | Sodium channel, voltage-gated, type IX,       | CERIII, CIAT, EIEE13, MED, NaCh6, Nav1.6, PN4   |   |
| SCOC    | Subunit                                       | ETHA, FED5B, GELSP7, NE-NA, NEINA, NAV1.7, FN1, |   |
| SCP2    | Short coiled-coil protein                     | SENP                                            |   |
| SCRN1   | Sterol carrier protein 2                      | HRIHFB20720, SCOC                               |   |
| SCRN2   | Secernin 1                                    | NLTP, NSL-TP, SCP-2, SCP-CHI, SCP-X, SCPX       |   |
| SCRN3   | Secernin 2                                    | SES1                                            |   |
| SCUBE1  | Secernin 3                                    | SES2                                            |   |
| SCUBE3  | Signal peptide, CUB domain, EGF-like 1        | SES3                                            |   |
| SDAD1   | Signal peptide, CUB domain, EGF-like 3        |                                                 |   |
| SDC2    | SDA1 domain containing 1                      | CEGF3                                           |   |
| SDC3    | Syndecan 2                                    |                                                 |   |
| SDC4    | Syndecan 3                                    | CD362, HSPG, HSPG1, SYND2                       |   |
| SDCBP   | Syndecan 4                                    | SDCN, SYND3                                     |   |
| SDF2L1  | Syndecan binding protein (syntenin)           | SYND4                                           | v |
| SDHAF1  | Stromal cell-derived factor 2-like 1          | MDA-9, ST1, SYCL, TACIP18                       |   |
| SDHAF2  | Succinate dehydrogenase complex assembly      | UNQ1941/PRO4424                                 |   |
| SDHAP1  | Succinate dehydrogenase complex, subunit      | LYRM8                                           |   |
| SDHAP2  | flavoprotein pseudogene 2                     |                                                 |   |
| SDK1    | Sidekick cell adhesion molecule 1             |                                                 |   |
| SDPR    | Serum deprivation response                    | CAVIN2, PS-p68, SDR, cavin-2                    |   |
| SDR42E1 | Short chain dehydrogenase/reductase family 4  | HSPC105                                         |   |
| SEC1    |                                               |                                                 |   |
| SEC11A  | SEC11 homolog A ( <i>S. cerevisiae</i> )      | 1810012E07Rik, SEC11L1, SPC18, SPCS4A, sid2895  |   |
| SEC14L5 | SEC14-like 5 ( <i>S. cerevisiae</i> )         | PRELID4B                                        |   |
| SEC16A  | SEC16 homolog A ( <i>S. cerevisiae</i> )      | RP11-413M3.10, KIAA0310, SEC16L, p250           |   |
| SEC16B  | SEC16 homolog B ( <i>S. cerevisiae</i> )      | LZTR2, PGPR-p117, RGPR, SEC16S                  |   |
| SEC22A  | SEC22 vesicle trafficking protein homolog     | SEC22L2                                         |   |
| SEC22C  | SEC22 vesicle trafficking protein homolog C   | UNQ459/PRO784, SEC22L3                          |   |
| SEC23IP | SEC23 interacting protein                     | MSTP053, P125, P125A                            |   |
| SEC24A  | SEC24 family member A                         |                                                 |   |

|          |                                                                                                                                    |                                                        |  |
|----------|------------------------------------------------------------------------------------------------------------------------------------|--------------------------------------------------------|--|
| SEC24B   | SEC24 family member B                                                                                                              | SEC24                                                  |  |
| SEC24C   | SEC24 family member C                                                                                                              |                                                        |  |
| SEC24D   | SEC24 family member D                                                                                                              |                                                        |  |
| SEC31B   | SEC31 homolog B ( <i>S. cerevisiae</i> )                                                                                           | SEC31B-1, SEC31L2                                      |  |
| SEC61A2  | Sec61 alpha 2 subunit ( <i>S. cerevisiae</i> )                                                                                     |                                                        |  |
| SEC62    | SEC62 homolog ( <i>S. cerevisiae</i> )                                                                                             | Dtrp1, HTP1, TLOC1, TP-1                               |  |
| SEC63    | SEC63 homolog ( <i>S. cerevisiae</i> )                                                                                             | RP1-191J18.4, DNAJC23, ERdj2, PRO2507L, SEC63          |  |
| SECISBP2 | SECIS binding protein 2                                                                                                            | RP11-89K14.1, SBP2                                     |  |
| SEL1L    | Sel-1 suppressor of lin-12-like ( <i>C. elegans</i> )                                                                              | UNQ128/PRO1063, PRO1063, SEL1-LIKE1, SEL1L             |  |
| SEL1L3   | Sel-1 suppressor of lin-12-like 3 ( <i>C. elegans</i> )                                                                            | Sel-1L3                                                |  |
| SELE     | Selectin E                                                                                                                         | RP11-111F20.2, CD62E, ELAM1, ELAM1, ESEL, LEGAM3       |  |
| SELK     | Selenoprotein K                                                                                                                    | HSPC030HSPC297, SelK                                   |  |
| SELT     | Selenoprotein T                                                                                                                    | UNQ150/PRO176                                          |  |
| SEMA3B   | Sema domain, immunoglobulin domain (Ig),<br>Sema domain, immunoglobulin domain (Ig),                                               | LUCA-1, SEMA5, SEMAA, SemaA, semaV                     |  |
| SEMA3C   | Sema domain, immunoglobulin domain (Ig),<br>Sema domain, immunoglobulin domain (Ig),                                               | SEMAE, SemE                                            |  |
| SEMA3D   | Sema domain, immunoglobulin domain (Ig),<br>Sema domain, immunoglobulin domain (Ig),                                               | UNQ760/PRO1491, Sema-Z2, coll-2                        |  |
| SEMA3E   | Sema domain, immunoglobulin domain (Ig),<br>Sema domain, immunoglobulin domain (Ig),                                               | M-SEMAH, M-SemaK, SEMAH, coll-5                        |  |
| SEMA3G   | Sema domain, immunoglobulin domain (Ig),<br>Sema domain, immunoglobulin domain (Ig),                                               | sem2                                                   |  |
| SEMA4C   | Sema domain, immunoglobulin domain (Ig),<br>Sema domain, immunoglobulin domain (Ig),                                               | UNQ5855/PRO54487, M-SEMA-T, SEMA-CT1, SEMAF,<br>SEMA-T |  |
| SEMA4D   | Sema domain, immunoglobulin domain (Ig),<br>Sema domain, immunoglobulin domain (Ig),                                               | AXYAC-11M08G7.1, C90H104, CD100, M-Sema-G,<br>SEMA4    |  |
| SEMA4F   | Sema domain, immunoglobulin domain (Ig),<br>Sema domain, immunoglobulin domain (Ig),                                               | SEMA4, PRO2555, S4F, SEMAM, SEMAW, M-Sema-<br>M        |  |
| SEMA4G   | Sema domain, immunoglobulin domain (Ig),<br>Sema domain, seven immunoglobulin repeats                                              | RP11-108L7.1                                           |  |
| SEMA5A   | Sema domain, transmembrane domain (TM),<br>Sema domain, transmembrane domain (TM),                                                 | SEMAF, semF                                            |  |
| SEMA6D   | Sema domain, transmembrane domain (TM),<br>Sema domain, transmembrane domain (TM),<br>and extracellular domain (extracellular) (CD |                                                        |  |
| SENP1    | SUMO1/sentrin specific peptidase 1                                                                                                 | SuPr-2                                                 |  |
| SENP2    | SUMO1/sentrin/SMT3 specific peptidase 2                                                                                            | AXAM2, SMT3IP2                                         |  |
| SENP5    | SUMO1/sentrin specific peptidase 5                                                                                                 | FKSG45                                                 |  |
| SENP7    | SUMO1/sentrin specific peptidase 7                                                                                                 |                                                        |  |
| SEPSECS  | Sep (G-phosphoserine) tRNA:Sec<br>(selenocysteine) tRNA: synthesis                                                                 | LP, PCH2D, SLA, SLA/LP                                 |  |
| SEPT1    | Septin 1                                                                                                                           | DIFF6, LARP, PNUTL3, SEP1                              |  |
| SEPT11   | Septin 11                                                                                                                          |                                                        |  |
| SEPT18   |                                                                                                                                    |                                                        |  |
| SEPT2    | Septin 2                                                                                                                           | DIFF6, NEDD-5, NEDD5, Pnutl3, hNedd5                   |  |

|           |                                                    |                                                       |   |
|-----------|----------------------------------------------------|-------------------------------------------------------|---|
| SEPT3     | Septin 3                                           | CTA-250D10.3, SEP3, bK250D10.3                        |   |
| SEPT5     | Septin5                                            | CDCKEL, CDCKEL-1, CDCKEL1, HS, TICDCKEL-1, DNL1TL1    |   |
| SEPT6     | Septin6                                            | RP5-876A24.2, SEP2, SEPT2                             | v |
| SEPT8     | Septin8                                            | SEP2                                                  |   |
| SERHL     | Serine hydrolase-like                              | CTA-120D4.2, DK120D4.1, DK120D4.2, H120D4Z, H122E12.1 |   |
| SERHL2    | Serine hydrolase-like 2                            | RP1-222E13.11-003, dJ222E13.1                         |   |
| SERINC1   | Serine incorporator 1                              | UNQ396/PRO732, TDE1L, TDE2, TMS-2, TMS2               |   |
| SERP1     | stress-associated endoplasmic reticulum            | RAMP4                                                 |   |
| SERP2     | stress-associated endoplasmic reticulum            | RP11-269C23.1, C13orf21, bA269C23.1                   |   |
| SERPINA1  | serpin peptidase inhibitor, class A (alpha-1)      | FK00064, ATA, ATAI, AAI, FI, FII, FK02275, alpha1AT   |   |
| SERPINA3  | serpin peptidase inhibitor, class A (alpha-1)      | GIG24, AACT, ACT, GIG25                               |   |
| SERPINA7  | serpin peptidase inhibitor, class A (alpha-1)      | RP1-82J11.2, TBG                                      |   |
| SERPINB11 | serpin peptidase inhibitor, class B                | EPIPIN, SERPIN11                                      |   |
| SERPINB13 | serpin peptidase inhibitor, class B                | HSHUR7SEQ, HUR7, PI13, headpin                        |   |
| SERPINB5  | serpin peptidase inhibitor, class B                | PI5, maspin                                           |   |
| SERPINB9  | serpin peptidase inhibitor, class B                | CAP-3, CAP3, PI-9, PI9                                |   |
| SERPINE1  | serpin peptidase inhibitor, class E (nekin)        | PAI, PAI-1, PAI1, PLANH1                              |   |
| SERPINF2  | serpin peptidase inhibitor, class E (nekin)        | GDN, GDNPF, PI-7, PI7, PN-1, PN1, PNI                 |   |
| SERPINI1  | serpin peptidase inhibitor, class I (neuroserpin)  | PII2, neuroserpin                                     |   |
| SERTAD2   | SERTA domain containing 2                          | Sei-2, TRIP-Br2                                       |   |
| SERTAD4   | SERTA domain containing 4                          | DJ667H12.2                                            |   |
| SESN3     | Sestrin 3                                          | SEST3                                                 |   |
| SESTD1    | SEC14 and spectrin domains 1                       | SOLO                                                  |   |
| SETBP1    | SET binding protein 1                              | SEB                                                   | v |
| SETD1B    | SET domain containing 1B                           | KMT2G, Set1B                                          |   |
| SETD4     | SET domain containing 4                            | C21orf18, C21orf27                                    |   |
| SETD7     | SET domain containing (lysine methyltransferase) 7 | KMT7, SET7, SET7/9, SET9                              |   |
| SETDB2    | SET domain, bifurcated 2                           | C13orf4, CLLD8, CLLL8, KMT1F                          |   |
| SETMAR    | SET domain and mariner transposase fusion gene     | HsMar1, METNASE, Mar1                                 |   |
| SETX      | Senataxin                                          | RP11-203M2.2, ALS4, AOA2, SCAR1, bA479K20.2           |   |
| SEZ6L     | Seizure related 6 homolog (mouse)-like             | RP3-341O5.1                                           |   |
| SF1       | Splicing factor 1                                  | BBP, D11S636, MBBP, ZCCHC25, ZFM1, ZNF162             |   |
| SF3A1     | Splicing factor 3a, subunit 1, 120 kDa             | PRP21, PRPF21, SAP11420, SF3A1                        |   |

|           |                                                           |                                                                                       |   |
|-----------|-----------------------------------------------------------|---------------------------------------------------------------------------------------|---|
| SF3A3     | Splicing factor 3a, subunit 3, 60 kDa                     | PRP9, PRPF9, SAP61, SF3a60                                                            |   |
| SF3B1     | Splicing factor 3b, subunit 1, 155 kDa                    | Hsh155, MDS, PRP10, PRPF10, SAP155, SF3b155                                           | √ |
| SF3B3     | Splicing factor 3b, subunit 3, 130 kDa                    | RSE1, SAP130, SF3b130, STAF130                                                        |   |
| SF4       | SURP and G patch domain containing 1                      | F23858, RBP, SF4                                                                      |   |
| SFMBT2    | Scm-like with four mbt domains 2                          | RP11-393K12.3                                                                         |   |
| SFRP4     | Secreted frizzled-related protein 4                       | FRP-4, FRPHE, sFRP-4                                                                  |   |
| SFRP5     | Secreted frizzled-related protein 5                       | SARP3                                                                                 |   |
| SFRS1     |                                                           |                                                                                       |   |
| SFRS11    | Serine/arginine-rich splicing factor 11                   | RP4-677H15.3, NET2, SFRS11, dJ677H15.2, p54                                           |   |
| SFRS12    | Splicing regulatory glutamine/lysine-rich protein 1       | SFRS12, SRrp508, SRrp86                                                               |   |
| SFRS12IP1 | SREK1-interacting protein 1                               | P18SRP, SFRS12IP1                                                                     |   |
| SFRS13A   | Serine/arginine-rich splicing factor 10                   | RP11-4M25.0, FUSH1, FUSH2, NSSK, PTTFR149, SFRS12, SFRS13A, SRp28, SRp40, TASP, TASP1 |   |
| SFRS13B   |                                                           |                                                                                       |   |
| SFRS14    |                                                           |                                                                                       |   |
| SFRS17A   |                                                           |                                                                                       |   |
| SFRS18    |                                                           |                                                                                       |   |
| SFRS2B    |                                                           |                                                                                       |   |
| SFRS2IP   |                                                           |                                                                                       |   |
| SFRS3     | Serine/arginine-rich splicing factor 3                    | SFRS3, SRp20                                                                          | √ |
| SFRS5     |                                                           |                                                                                       |   |
| SFRS7     |                                                           |                                                                                       |   |
| SFT2D1    | SFT2 domain containing 1                                  | C6orf83, pRGR1                                                                        |   |
| SFT2D2    | SFT2 domain containing 2                                  | RP4-747L4.1, UNQ512, dJ747L4.C1.2                                                     |   |
| SFTPA1    | Surfactant protein A1                                     | RP11-589B3.2, COLEC4, TSAI, TSAI-A, TSAI-B, SFTPA1B, SP-A, SP-A1, SPA, SPA1, SFTPA1   |   |
| SFTPB     | Surfactant protein B                                      | PSP-B, SFTB3, SFTP3, SMDP1, SP-B                                                      |   |
| SFXN1     | Sideroflexin 1                                            |                                                                                       |   |
| SFXN2     | Sideroflexin 2                                            | RP11-47A8.2                                                                           |   |
| SFXN3     | Sideroflexin 3                                            | RP11-108L7.3, BA108L7.2, SFX3                                                         |   |
| SFXN5     | Sideroflexin 5                                            | BBG-TCC                                                                               |   |
| SGCB      | Sarcoglycan, beta (45 kDa dystrophin-associated protein)  | A3b, LGMD2E, SGC                                                                      |   |
| SGCD      | Sarcoglycan, delta (55 kDa dystrophin-associated protein) | 35DAG, CMD1L, DAGD, SG-deltaP, SGD, SGCD                                              |   |
| SGCE      | Sarcoglycan, epsilon                                      | UNQ433/PRO840, DYT11, ESG                                                             |   |
| SGCZ      | Sarcoglycan, zeta                                         | ZSG1                                                                                  |   |

|          |                                                                     |                                                        |   |
|----------|---------------------------------------------------------------------|--------------------------------------------------------|---|
| SGEF     |                                                                     |                                                        |   |
| SGIP1    | SH3-domain GRB2-like (endophilin) interacting protein 1             | RP11-266I14.1                                          |   |
| SGK1     | Serum/glucocorticoid regulated kinase 1                             | RP1-188K17.1, SGK                                      |   |
| SGK2     | Serum/glucocorticoid regulated kinase 2                             | RP1-138B7.2, H-SGK2, dJ138B7.2                         |   |
| SGK269   | Pseudopodium-enriched atypical kinase 1                             | SGK269                                                 |   |
| SGK3     | Serum/glucocorticoid regulated kinase family member 2               | CISK, SGK2, SGKL                                       |   |
| SGMS1    | Sphingomyelin synthase 1                                            | MOB, MOB1, SMS1, TMEM23, hmob33                        |   |
| SGMS2    | Sphingomyelin synthase 2                                            | SMS2                                                   |   |
| SGOL2    | Shugoshin-like 2 (S. pombe)                                         | SGO2, TRIPIN                                           |   |
| SGPP1    | Sphingosine-1-phosphate phosphatase 1                               | SPPase1                                                |   |
| SGSH     | N-sulfoglucosamine sulfohydrolase                                   | HSS, MPS3A, SFMD                                       |   |
| SGSM2    | Small G protein signaling modulator 2                               | RUTBC1                                                 |   |
| SGTB     | Small glutamine-rich tetratricopeptide repeat (STR) containing beta | SGT2                                                   |   |
| SH2B3    | SH2B adaptor protein 3                                              | IDDM20, LNK                                            | ✓ |
| SH2D1B   | SH2 domain containing 1B                                            | EAT2                                                   |   |
| SH2D3C   | SH2 domain containing 3C                                            | RP11-56D16.1, CHAT, NSP3, PRO34088, SHEP1              |   |
| SH2D4A   | SH2 domain containing 4A                                            | PPP1R38, SH2A                                          |   |
| SH2D4B   | SH2 domain containing 4B                                            | RP11-514F8.1                                           |   |
| SH2D6    | SH2 domain containing 6                                             |                                                        |   |
| SH2D7    | SH2 domain containing 7                                             | hCG_38941                                              |   |
| SH3BP2   | SH3-domain binding protein 2                                        | RES4-23, 3BP-2, 3BP2, CRBM, CRPM                       |   |
| SH3GLB1  | SH3-domain GRB2-like endophilin B1                                  | CGI-61, Bif-1, PPP1R70, dJ612B15.2                     |   |
| SH3KBP1  | SH3-domain kinase binding protein 1                                 | RP11-545E8.1, CDZDF3, CIN65, GIG10, HSD-1, HSD1, MGC18 |   |
| SH3PXD2B | SH3 and PX domains 2B                                               | FAD49, FTHS, HOF1, KIAA1295, TKS4, TSK4                |   |
| SH3RF1   | SH3 domain containing ring finger 1                                 | POSH, RNF142, SH3MD2                                   |   |
| SH3RF3   | SH3 domain containing ring finger 3                                 | POSH2, SH3MD4                                          |   |
| SH3TC2   | SH3 domain and tetratricopeptide repeats 2                          | PP12494, CMT4C, MNMN                                   |   |
| SHANK2   | SH3 and multiple ankyrin repeat domains 2                           | ACU1317, COR1B1, CTNBD11, FUSAP1, SHANK, SPANK2        |   |
| SHANK3   | SH3 and multiple ankyrin repeat domains 3                           | DEL22q13.3, PROSAP2, PSAP2, SCZD15, SPANK-2            |   |
| SHB      | Src homology 2 domain containing adaptor                            |                                                        |   |
| SHC4     | Src (SHC homology 2 domain containing) family member 4              | UNQ6438/PRO21364, RaLP, SHCD                           |   |
| SHE      | Src homology 2 domain containing E                                  | RP11-350G8.8                                           |   |
| SHISA6   | Shisa family member 6                                               |                                                        |   |



|          |                                                               |                                                                 |  |
|----------|---------------------------------------------------------------|-----------------------------------------------------------------|--|
| SHISA9   | Shisa family member 9                                         | CKAMP44                                                         |  |
| SHMT1    | Serine hydroxymethyltransferase 1 (soluble)                   | CSHMT, SHMT                                                     |  |
| SHOC2    | SOC-2 suppressor of clear homolog (C. elegans)                | RP11-348N5.2, SIAA0862, SOC2, SUR8                              |  |
| SHOX     | Short stature homeobox                                        | GCFX, PHOXY, SS, SHOX                                           |  |
| SHOX2    | Short stature homeobox 2                                      | OG12, OG12X, SHOT                                               |  |
| SHPRH    | SHPRH histone H4K119 methyltransferase, ES                    | RP11-545I5.1, bA545I5.2                                         |  |
| SHQ1     | SHQ1, 11/ACA ribonucleoprotein assembly factor                | Shq1p                                                           |  |
| SHROOM3  | Shroom family member 3                                        | MSTP013, APXL3, SHRM, ShrmL                                     |  |
| SIAE     | Sialic acid acetyltransferase                                 | AIS6, CSE-C, CSEC, LSE, YSG2                                    |  |
| SIAH3    | Siah E3 ubiquitin protein ligase family member 3              | RP11-480G1.1                                                    |  |
| SIDT2    | SID1 transmembrane family, member 2                           | CGI-40                                                          |  |
| SIGLEC1  | Sialic acid binding Ig-like lectin 1, sialoadhesin            | CD169, SIGLEC-1, SN, dJ1009E24.1                                |  |
| SIGLEC14 | Sialic acid binding Ig-like lectin 14                         | UNQ294                                                          |  |
| SIGLECP3 | Sialic acid binding Ig-like lectin, pseudogene 3              | SIGLECP2                                                        |  |
| SIK2     | Salt-inducible kinase 2                                       | LOH11CR11, QIK, SNF1LK2                                         |  |
| SIK3     | SIK family kinase 3                                           | L19, QSK, SIK-3                                                 |  |
| SIKE1    | Suppressor of IKBKE 1                                         | RP5-1000E10.4, SIKE                                             |  |
| SIN3A    | SIN3 transcription regulator family member A                  |                                                                 |  |
| SIN3B    | SIN3 transcription regulator family member B                  |                                                                 |  |
| SIP1     |                                                               |                                                                 |  |
| SIPA1L2  | Signal-induced proliferation-associated 1 like 2              | SPAL2                                                           |  |
| SIRPA    | Signal-regulatory protein alpha                               | IR4-064O24.2, B11, CD172A, MFK, MTD-1, P64, PTPNS1, SIRS1, SIRD |  |
| SIRPB2   | Signal-regulatory protein beta 2                              | RP4-776F14.1, PTPN1L, PTPNS1L3, dJ776F14.2                      |  |
| SIRT1    | Sirtuin 1                                                     | RP11-57G10.3, SIR2L1                                            |  |
| SIRT3    | Sirtuin 3                                                     | SIR2L3                                                          |  |
| SIRT5    | Sirtuin 5                                                     | SIR2L5                                                          |  |
| SIX2     | SIX homeobox 2                                                |                                                                 |  |
| SIX4     | SIX homeobox 4                                                | AREC3                                                           |  |
| SKA2     | Spindle and kinetochore associated complex subunit 2          | FAM33A                                                          |  |
| SKAP2    | Src kinase associated phosphoprotein 2                        | PRAP, RA70, SAPS, SCAP2, SKAP-HOM, SKAP55R                      |  |
| SKIL     | SKI-like proto-oncogene                                       | SNO, SnoA, SnoI, SnoN                                           |  |
| SKIV2L2  | Superkiller viral protein activity 2-like 2 (D. melanogaster) | Dob1, KIAA0052, Mtr4, fSAP118                                   |  |
| SKP1     | S-phase kinase-associated protein 1                           | EMC19, OCP-II, OCP2A, TCEB1L, p19A, SKP1                        |  |

|          |                                                                      |                                                                            |  |
|----------|----------------------------------------------------------------------|----------------------------------------------------------------------------|--|
| SLA      | Src-like-adaptor                                                     | SLA1P, SLA                                                                 |  |
| SLAIN1   | SLAIN motif family, member 1                                         | RP11-188A23.1, C13orf32                                                    |  |
| SLAIN2   | SLAIN motif family, member 2                                         | KIAA1458                                                                   |  |
| SLAMF6   | SLAM family member 6                                                 | RP11-528G1.1, CD55Z, KALI, KALIB, Ly108, NTB-A, NTB-A, SE2000              |  |
| SLAMF7   | SLAM family member 7                                                 | UNQ576/PRO1138, 19A, CD319, CRACC, CS1                                     |  |
| SLC10A7  | Solute carrier family 10, member 7                                   | PSEC0051, C4orf13, P7                                                      |  |
| SLC11A1  | Solute carrier family 11 (proton-coupled)                            | LSH, NRAMP, NRAMP1                                                         |  |
| SLC11A2  | Solute carrier family 11 (proton-coupled)                            | OK/SW-cl.20, DCT1, DMT1, NRAMP2                                            |  |
| SLC12A2  | Solute carrier family 12 (sodium/cotransporter) member 2             | BSC, BSC2, NKCC1, PPP1R141                                                 |  |
| SLC12A3  | Solute carrier family 12 (sodium/cotransporter) member 3             | NCC, NCCT, TSC                                                             |  |
| SLC12A5  | Solute carrier family 12 (potassium/chloride transporter) member 5   | RP11-465L10.5, KCC2                                                        |  |
| SLC12A8  | Solute carrier family 12, member 8                                   | CCC9                                                                       |  |
| SLC13A3  | Solute carrier family 13 (sodium-dependent)                          | RP1-257E24.1, NADC3, SDCT2                                                 |  |
| SLC13A4  | Solute carrier family 13 (sodium/sulfate)                            | SUT-1, SUT1                                                                |  |
| SLC14A1  | Solute carrier family 14 (urea transporter),                         | UCP11, HST1341, JK, KACH1, KACH2, UT-D1, UT1, UTE                          |  |
| SLC16A1  | Solute carrier family 16 (monocarboxylate transporter) member 1      | RP4-580L15.1, HHF7, MCT, MCT1                                              |  |
| SLC16A14 | Solute carrier family 16, member 14                                  | MCT14                                                                      |  |
| SLC16A2  | Solute carrier family 16, member 2 (lipoic coenzyme transporter)     | RP11-449M9.1, AIDS, DAST26, DAST26L, MCT 7, MCT 8, MCT7, MCT8, MBX22, VDCT |  |
| SLC16A4  | Solute carrier family 16, member 4                                   | RP5-1074L1.3, MCT4, MCT5                                                   |  |
| SLC16A6  | Solute carrier family 16, member 6                                   | MCT6, MCT7                                                                 |  |
| SLC16A9  | Solute carrier family 16, member 9                                   | C10orf36, MCT9                                                             |  |
| SLC17A2  | Solute carrier family 17, member 2                                   | NPT3                                                                       |  |
| SLC17A3  | Solute carrier family 17 (organic anion)                             |                                                                            |  |
| SLC17A6  | Solute carrier family 17 (vesicular glutamate)                       | DNPI, VGLUT2                                                               |  |
| SLC17A7  | Solute carrier family 17 (vesicular glutamate)                       | BNPI, VGLUT1                                                               |  |
| SLC17A8  | Solute carrier family 17 (vesicular glutamate)                       | DFNA25, VGLUT3                                                             |  |
| SLC19A2  | Solute carrier family 19 (unamine)                                   |                                                                            |  |
| SLC19A3  | Solute carrier family 19 (unamine)                                   | BBGD, THMD2, THTR2                                                         |  |
| SLC1A2   | Solute carrier family 1 (glutathione affinity)                       | EAAT2, GLT-1                                                               |  |
| SLC1A3   | Solute carrier family 1 (glutathione affinity)                       | EA6, EAAT1, GLAST, GLAST1                                                  |  |
| SLC1A4   | Solute carrier family 1 (glutathione affinity)                       | ASCT1, SATT                                                                |  |
| SLC20A1  | Solute carrier family 20 (phosphate)                                 | GLVR1, Glvr-1, PIT1, PiT-1                                                 |  |
| SLC22A12 | Solute carrier family 22 (organic anion/urate transporter) member 12 | UNQ6453/PRO34004, OAT4L, RST, URAT1                                        |  |

|          |                                                                                     |                                                          |  |
|----------|-------------------------------------------------------------------------------------|----------------------------------------------------------|--|
| SLC22A14 | Solute carrier family 22, member 14                                                 | OCTL2, OCTL4, ORCTL4                                     |  |
| SLC22A15 | Solute carrier family 22, member 15                                                 | UNQ9429/PRO34686, FLIPT1, PRO34686                       |  |
| SLC22A2  | Solute carrier family 22 (organic cation transporter), member 2                     | RP11-317M22.2, OCT2                                      |  |
| SLC22A23 | Solute carrier family 22, member 23                                                 | RP11-506K6.2, C6orf85                                    |  |
| SLC22A25 | Solute carrier family 22, member 25                                                 | HIMTP, UST6                                              |  |
| SLC22A3  | Solute carrier family 22 (organic cation transporter), member 3                     | RP11-72O9.3, EMT, EMTH, OCT3                             |  |
| SLC22A5  | Solute carrier family 22 (organic cation transporter), member 5                     | CDSP, OCTN2, OCTN2VT                                     |  |
| SLC22A8  | Solute carrier family 22 (organic anion transporter), member 8                      | OAT3                                                     |  |
| SLC22A9  | Solute carrier family 22 (organic anion transporter), member 9                      | HOAT4, OAT4, OAT7, UST3H, ust3                           |  |
| SLC23A2  | Solute carrier family 23 (ascorbic acid transporter), member 2                      | RP1-237C24.1, NBTL1, SLC23A1, SVCT2, YSPL2               |  |
| SLC24A1  | Solute carrier family 24 (sodium-coupled)                                           | CSNB1D, HsT17412, NCKX, NCKX1, RODX                      |  |
| SLC24A3  | Solute carrier family 24 (sodium-coupled)                                           | RP1-122P22.1, NCKX3                                      |  |
| SLC24A4  | Solute carrier family 24 (sodium-coupled)                                           | AI2A5, NCKX4, SHEP6, SLC24A2                             |  |
| SLC25A12 | Solute carrier family 25 (aspartate/glutamate transporter), member 12               | AGC1, ARALAR                                             |  |
| SLC25A15 | Solute carrier family 25 (mitochondrial aspartate/glutamate transporter), member 15 | RP11-346L13.4, D13S327, HHH, ORC1, ORNT1                 |  |
| SLC25A2  | Solute carrier family 25 (mitochondrial aspartate/glutamate transporter), member 2  | ORC2, ORNT2                                              |  |
| SLC25A21 | Solute carrier family 25 (mitochondrial aspartate/glutamate transporter), member 21 | ODC, ODC1                                                |  |
| SLC25A24 | Solute carrier family 25 (mitochondrial aspartate/glutamate transporter), member 24 | RP11-356N1.3, APC1, SCAMC-1                              |  |
| SLC25A25 | Solute carrier family 25 (mitochondrial aspartate/glutamate transporter), member 25 | RP11-395P17.4, MCSC, PCSCL, SCAMC-2                      |  |
| SLC25A27 | Solute carrier family 25, member 27                                                 | RP11-446F17.2, UCP4                                      |  |
| SLC25A29 | Solute carrier family 25 (mitochondrial aspartate/glutamate transporter), member 29 | C14orf69, CACL, ORNT3                                    |  |
| SLC25A30 | Solute carrier family 25, member 30                                                 | KMCP1                                                    |  |
| SLC25A32 | Solute carrier family 25 (mitochondrial aspartate/glutamate transporter), member 32 | MFT, MFTC                                                |  |
| SLC25A36 | Solute carrier family 25 (pyrimidine nucleotide carrier), member 36                 | PNC2                                                     |  |
| SLC25A37 | Solute carrier family 25 (pyrimidine nucleotide carrier), member 37                 | HT015, MFKN, MFKN1, MSC, MSC1, PRO1278, PRO1584, PRO2217 |  |
| SLC25A38 | Solute carrier family 25, member 38                                                 |                                                          |  |
| SLC25A4  | Solute carrier family 25 (mitochondrial aspartate/glutamate transporter), member 4  | 1, AAC1, ANT, ANT1, ANT11, MIDP512, PEO2, PEO3, T1       |  |
| SLC25A40 | Solute carrier family 25, member 40                                                 | MCFP                                                     |  |
| SLC25A44 | Solute carrier family 25, member 44                                                 | RP11-54H19.3                                             |  |
| SLC26A2  | Solute carrier family 26 (anion exchanger), member 2                                | D5S1708, DTD, DTDST, EDM4, MST153, MSTP157               |  |
| SLC26A4  | Solute carrier family 26 (anion exchanger), member 4                                | DFNB4, EVA, PDS, TDH2B                                   |  |
| SLC26A7  | Solute carrier family 26 (anion exchanger), member 7                                | SUT2                                                     |  |
| SLC26A9  | Solute carrier family 26 (anion exchanger), member 9                                |                                                          |  |

|          |                                                         |                                                  |   |
|----------|---------------------------------------------------------|--------------------------------------------------|---|
| SLC27A3  | Solute carrier family 27 (fatty acid                    | PSEC0067, ACSVL3, FATP3, VLCS-3                  |   |
| SLC2A1   | Solute carrier family 2 (facilitated glucose            | D1117, D1118, D119, EIG12, GLUT1, GLUT11,        |   |
| SLC2A12  | Solute carrier family 2 (facilitated glucose            | GLUT12, GLUT8                                    |   |
| SLC2A13  | Solute carrier family 2 (facilitated glucose            | HMIT                                             |   |
| SLC2A3   | Solute carrier family 2 (facilitated glucose            | GLUT3                                            |   |
| SLC30A10 | Solute carrier family 30, member 10                     | HMDPC, ZNT10, ZNT8, ZRC1, ZnT-10                 |   |
| SLC30A7  | Solute carrier family 30 (zinc transporter),            | RP11-30G24.1, ZNT7, ZnT-7, ZnTL2                 |   |
| SLC30A8  | Solute carrier family 30 (zinc transporter),            | ZNT8, ZnT-8                                      |   |
| SLC30A9  | Solute carrier family 30 (zinc transporter),            | C4orf1, GAC63, HUEL, ZNT9                        |   |
| SLC31A1  | Solute carrier family 31 (copper transporter),          | RP11-110L1.1, COPT1, CTR1                        |   |
| SLC33A1  | Solute carrier family 33 (acetyl-CoA                    | ACATN, AT-1, AT1, CCHLND, SPG42                  |   |
| SLC34A2  | Solute carrier family 34 (type II                       | NAPI-3B, NAPI-IIIb, NPTIIb                       | √ |
| SLC35A1  | Solute carrier family 35 (CMI <sup>-</sup> -sialic acid | CDG2F, CMPST, CST, hCST                          |   |
| SLC35A2  | Solute carrier family 35 (CMI <sup>-</sup> -sialic acid | CDG2M, CDG2X, UDF-Gal-II, UGALT, UGAT, UGT,      |   |
| SLC35A4  | Solute carrier family 35, member A4                     | UCT1, UCT2, UCT3                                 |   |
| SLC35B4  | Solute carrier family 35 (UDF-xylose/UDF-               | PSEC0055, YEA, YEA4                              |   |
| SLC35C2  | Solute carrier family 35 (UDF-glucose                   | RP11-39402.1, BA39402.1, C20orf5, CGI-15, OVCOV1 |   |
| SLC35D1  | Solute carrier family 35 (UDF-GlcA/UDF-                 | UGTREL7                                          |   |
| SLC35D2  | Solute carrier family 35 (UDF-GlcNAc/UDF-               | RP11-240L7.2, HFRC1, SQV7L, UGTrel8, hfrc        |   |
| SLC35D3  | Solute carrier family 35, member D3                     | FRCL1, bA55K22.3                                 |   |
| SLC35E1  | Solute carrier family 35, member E1                     | PSEC0038                                         |   |
| SLC35E2  | Solute carrier family 35, member E2                     | RP1-283E3.5                                      |   |
| SLC35E3  | Solute carrier family 35, member E3                     | UNQ3043/PRO9859, BLOV1                           |   |
| SLC35F1  | Solute carrier family 35, member F1                     | RP1-230I3.1, C6orf169, dJ230I3.1                 |   |
| SLC35F3  | Solute carrier family 35, member F3                     |                                                  |   |
| SLC35F4  | Solute carrier family 35, member F4                     | C14orf36, c14_5373                               |   |
| SLC36A1  | Solute carrier family 36 (proton/amine acid             | Dct1, LYAAT1, PAT1, TRAMD3                       |   |
| SLC37A3  | Solute carrier family 37, member 3                      |                                                  |   |
| SLC38A1  | Solute carrier family 38, member 1                      | ATA1, NAT2, SAT1, SNAT1                          |   |
| SLC38A10 | Solute carrier family 38, member 10                     | PP1744                                           |   |
| SLC38A2  | Solute carrier family 38, member 2                      | ATA2, PRO1068, SAT2, SNAT2                       |   |
| SLC38A4  | Solute carrier family 38, member 4                      | ATA3, NAT3, PAAT                                 |   |
| SLC38A6  | Solute carrier family 38, member 6                      | NAT-1                                            |   |

|          |                                                                                  |                                                                                                                                                                                                                                                                                                                                                                                                                                                                                                                                                                                                                                                                                                                                                                                                                        |  |
|----------|----------------------------------------------------------------------------------|------------------------------------------------------------------------------------------------------------------------------------------------------------------------------------------------------------------------------------------------------------------------------------------------------------------------------------------------------------------------------------------------------------------------------------------------------------------------------------------------------------------------------------------------------------------------------------------------------------------------------------------------------------------------------------------------------------------------------------------------------------------------------------------------------------------------|--|
| SLC39A10 | Solute carrier family 39 (zinc transporter), member 10                           | LZT-Hs2                                                                                                                                                                                                                                                                                                                                                                                                                                                                                                                                                                                                                                                                                                                                                                                                                |  |
| SLC39A11 | Solute carrier family 39, member 11                                              | C17orf26, ZIP11                                                                                                                                                                                                                                                                                                                                                                                                                                                                                                                                                                                                                                                                                                                                                                                                        |  |
| SLC39A12 | Solute carrier family 39 (zinc transporter), member 12                           | LZT-Hs8, ZIP-12, bA570F3.1                                                                                                                                                                                                                                                                                                                                                                                                                                                                                                                                                                                                                                                                                                                                                                                             |  |
| SLC39A13 | Solute carrier family 39 (zinc transporter), member 13                           |                                                                                                                                                                                                                                                                                                                                                                                                                                                                                                                                                                                                                                                                                                                                                                                                                        |  |
| SLC39A14 | Solute carrier family 39 (zinc transporter), member 14                           | LZT-Hs4, NET34, ZIP14, cig19                                                                                                                                                                                                                                                                                                                                                                                                                                                                                                                                                                                                                                                                                                                                                                                           |  |
| SLC39A3  | Solute carrier family 39 (zinc transporter), member 3                            | ZIP-3, ZIP3                                                                                                                                                                                                                                                                                                                                                                                                                                                                                                                                                                                                                                                                                                                                                                                                            |  |
| SLC39A6  | Solute carrier family 39 (zinc transporter), member 6                            | LIV-1                                                                                                                                                                                                                                                                                                                                                                                                                                                                                                                                                                                                                                                                                                                                                                                                                  |  |
| SLC39A8  | Solute carrier family 39 (zinc transporter), member 8                            | PP3105, BIGM103, LZT-Hs6, ZIP8                                                                                                                                                                                                                                                                                                                                                                                                                                                                                                                                                                                                                                                                                                                                                                                         |  |
| SLC39A9  | Solute carrier family 39 (zinc transporter), member 9                            | UNQ714/PRO1377, ZIP-9, ZIP9                                                                                                                                                                                                                                                                                                                                                                                                                                                                                                                                                                                                                                                                                                                                                                                            |  |
| SLC3A1   | Solute carrier family 3 (amino acid transporter), member 1                       | ATR1, CSNU1, D2H, NBAT, RBAT                                                                                                                                                                                                                                                                                                                                                                                                                                                                                                                                                                                                                                                                                                                                                                                           |  |
| SLC41A2  | Solute carrier family 41 (magnesium transporter), member 2                       | SLC41A1-L1                                                                                                                                                                                                                                                                                                                                                                                                                                                                                                                                                                                                                                                                                                                                                                                                             |  |
| SLC43A1  | Solute carrier family 43 (amino acid system transporter), member 1               | LAT3, PB39, POV1, R00504                                                                                                                                                                                                                                                                                                                                                                                                                                                                                                                                                                                                                                                                                                                                                                                               |  |
| SLC44A1  | Solute carrier family 44 (chloride transporter), member 1                        | RP11-287A8.1, CD92, CDW92, CHTL1, CTL1                                                                                                                                                                                                                                                                                                                                                                                                                                                                                                                                                                                                                                                                                                                                                                                 |  |
| SLC44A5  | Solute carrier family 44, member 5                                               | CTL5                                                                                                                                                                                                                                                                                                                                                                                                                                                                                                                                                                                                                                                                                                                                                                                                                   |  |
| SLC45A1  | Solute carrier family 45, member 1                                               | DNB5                                                                                                                                                                                                                                                                                                                                                                                                                                                                                                                                                                                                                                                                                                                                                                                                                   |  |
| SLC45A4  | Solute carrier family 45, member 4                                               |                                                                                                                                                                                                                                                                                                                                                                                                                                                                                                                                                                                                                                                                                                                                                                                                                        |  |
| SLC46A1  | Solute carrier family 46 (urate transporter), member 1                           | G21, HCP1, PCFT                                                                                                                                                                                                                                                                                                                                                                                                                                                                                                                                                                                                                                                                                                                                                                                                        |  |
| SLC46A2  | Solute carrier family 46, member 2                                               | Ly110, TSCOT                                                                                                                                                                                                                                                                                                                                                                                                                                                                                                                                                                                                                                                                                                                                                                                                           |  |
| SLC48A1  | Solute carrier family 48 (heme transporter), member 1                            | HRG-1, HRG1, hHRG-1                                                                                                                                                                                                                                                                                                                                                                                                                                                                                                                                                                                                                                                                                                                                                                                                    |  |
| SLC4A10  | Solute carrier family 4, sodium bicarbonate transporter, member 10               | NBCn2, NCBE                                                                                                                                                                                                                                                                                                                                                                                                                                                                                                                                                                                                                                                                                                                                                                                                            |  |
| SLC4A4   | Solute carrier family 4 (sodium bicarbonate transporter), member 4               | hNBC1, hNBC2, hNBC3, hNBC4, hNBC5, hNBC6, hNBC7, hNBC8, hNBC9, hNBC10, hNBC11, hNBC12, hNBC13, hNBC14, hNBC15, hNBC16, hNBC17, hNBC18, hNBC19, hNBC20, hNBC21, hNBC22, hNBC23, hNBC24, hNBC25, hNBC26, hNBC27, hNBC28, hNBC29, hNBC30, hNBC31, hNBC32, hNBC33, hNBC34, hNBC35, hNBC36, hNBC37, hNBC38, hNBC39, hNBC40, hNBC41, hNBC42, hNBC43, hNBC44, hNBC45, hNBC46, hNBC47, hNBC48, hNBC49, hNBC50, hNBC51, hNBC52, hNBC53, hNBC54, hNBC55, hNBC56, hNBC57, hNBC58, hNBC59, hNBC60, hNBC61, hNBC62, hNBC63, hNBC64, hNBC65, hNBC66, hNBC67, hNBC68, hNBC69, hNBC70, hNBC71, hNBC72, hNBC73, hNBC74, hNBC75, hNBC76, hNBC77, hNBC78, hNBC79, hNBC80, hNBC81, hNBC82, hNBC83, hNBC84, hNBC85, hNBC86, hNBC87, hNBC88, hNBC89, hNBC90, hNBC91, hNBC92, hNBC93, hNBC94, hNBC95, hNBC96, hNBC97, hNBC98, hNBC99, hNBC100 |  |
| SLC4A7   | Solute carrier family 4, sodium bicarbonate transporter, member 7                | NBC2, NBC3, NBCN1, SBC2, SLC4A6                                                                                                                                                                                                                                                                                                                                                                                                                                                                                                                                                                                                                                                                                                                                                                                        |  |
| SLC4A8   | Solute carrier family 4, sodium bicarbonate transporter, member 8                | NBC3, NDCBE                                                                                                                                                                                                                                                                                                                                                                                                                                                                                                                                                                                                                                                                                                                                                                                                            |  |
| SLC5A1   | Solute carrier family 5 (sodium/glucose transporter), member 1                   | RP1-127L4.1, D22S675, NAGT, SGLT1                                                                                                                                                                                                                                                                                                                                                                                                                                                                                                                                                                                                                                                                                                                                                                                      |  |
| SLC5A12  | Solute carrier family 5, member 12                                               | SMCT2                                                                                                                                                                                                                                                                                                                                                                                                                                                                                                                                                                                                                                                                                                                                                                                                                  |  |
| SLC5A3   | Solute carrier family 5 (sodium/myo-inositol transporter), member 3              | BCW2, SMIT, SMIT1, SMIT2                                                                                                                                                                                                                                                                                                                                                                                                                                                                                                                                                                                                                                                                                                                                                                                               |  |
| SLC5A8   | Solute carrier family 5, member 8                                                | AIT, SMCT, SMCT1                                                                                                                                                                                                                                                                                                                                                                                                                                                                                                                                                                                                                                                                                                                                                                                                       |  |
| SLC5A9   | Solute carrier family 5 (sodium/sugar transporter), member 9                     | SGLT4                                                                                                                                                                                                                                                                                                                                                                                                                                                                                                                                                                                                                                                                                                                                                                                                                  |  |
| SLC6A11  | Solute carrier family 6 (neurotransmitter transporter), member 11                | GAT-3, GAT3, GAT4                                                                                                                                                                                                                                                                                                                                                                                                                                                                                                                                                                                                                                                                                                                                                                                                      |  |
| SLC6A12  | Solute carrier family 6 (neurotransmitter transporter), member 12                | BGT-1, BGT1, GAT2                                                                                                                                                                                                                                                                                                                                                                                                                                                                                                                                                                                                                                                                                                                                                                                                      |  |
| SLC6A16  | Solute carrier family 6, member 16                                               | NT5, NTT5                                                                                                                                                                                                                                                                                                                                                                                                                                                                                                                                                                                                                                                                                                                                                                                                              |  |
| SLC6A20  | Solute carrier family 6 (proton-coupled neurotransmitter transporter), member 20 | SIT1, XT3, Xtrp3                                                                                                                                                                                                                                                                                                                                                                                                                                                                                                                                                                                                                                                                                                                                                                                                       |  |
| SLC6A6   | Solute carrier family 6 (neurotransmitter transporter), member 6                 | TAUT                                                                                                                                                                                                                                                                                                                                                                                                                                                                                                                                                                                                                                                                                                                                                                                                                   |  |

|          |                                                                      |                                                                                                                                                                                                                                                                                                                                                                                                                                                                                                                                                                                                                                                                                                                                                                                                                                                                                                                                                                                                                                                                                                                                                    |
|----------|----------------------------------------------------------------------|----------------------------------------------------------------------------------------------------------------------------------------------------------------------------------------------------------------------------------------------------------------------------------------------------------------------------------------------------------------------------------------------------------------------------------------------------------------------------------------------------------------------------------------------------------------------------------------------------------------------------------------------------------------------------------------------------------------------------------------------------------------------------------------------------------------------------------------------------------------------------------------------------------------------------------------------------------------------------------------------------------------------------------------------------------------------------------------------------------------------------------------------------|
| SLC7A1   | Solute carrier family 7 (cationic amino acid transporters)           | RP11-274A8.1, ATRC1, CAT-1, ERR, HCAT1, REC1L                                                                                                                                                                                                                                                                                                                                                                                                                                                                                                                                                                                                                                                                                                                                                                                                                                                                                                                                                                                                                                                                                                      |
| SLC7A11  | Solute carrier family 7 (anionic amino acid transporters)            | CCBR1, xCT                                                                                                                                                                                                                                                                                                                                                                                                                                                                                                                                                                                                                                                                                                                                                                                                                                                                                                                                                                                                                                                                                                                                         |
| SLC7A13  | Solute carrier family 7 (anionic amino acid transporters), member 13 | AGT-1, AGT1, XAT2                                                                                                                                                                                                                                                                                                                                                                                                                                                                                                                                                                                                                                                                                                                                                                                                                                                                                                                                                                                                                                                                                                                                  |
| SLC7A14  | Solute carrier family 7, member 14                                   | PPP1R142                                                                                                                                                                                                                                                                                                                                                                                                                                                                                                                                                                                                                                                                                                                                                                                                                                                                                                                                                                                                                                                                                                                                           |
| SLC7A2   | Solute carrier family 7 (cationic amino acid transporters)           | ATRC2, CAT2, HCAT2                                                                                                                                                                                                                                                                                                                                                                                                                                                                                                                                                                                                                                                                                                                                                                                                                                                                                                                                                                                                                                                                                                                                 |
| SLC7A5P2 | Solute carrier family 7 (amino acid transporters), member 5          | IMAA, MMAA                                                                                                                                                                                                                                                                                                                                                                                                                                                                                                                                                                                                                                                                                                                                                                                                                                                                                                                                                                                                                                                                                                                                         |
| SLC7A6   | Solute carrier family 7, member 6                                    | LAT-2, LAT3, y+LAT-2                                                                                                                                                                                                                                                                                                                                                                                                                                                                                                                                                                                                                                                                                                                                                                                                                                                                                                                                                                                                                                                                                                                               |
| SLC7A6OS | Solute carrier family 7, member 6 opposite                           |                                                                                                                                                                                                                                                                                                                                                                                                                                                                                                                                                                                                                                                                                                                                                                                                                                                                                                                                                                                                                                                                                                                                                    |
| SLC8A1   | Solute carrier family 8 (sodium/calcium transporters), member 1      | NCX1                                                                                                                                                                                                                                                                                                                                                                                                                                                                                                                                                                                                                                                                                                                                                                                                                                                                                                                                                                                                                                                                                                                                               |
| SLC8A3   | Solute carrier family 8 (sodium/calcium transporters), member 3      | NCX3                                                                                                                                                                                                                                                                                                                                                                                                                                                                                                                                                                                                                                                                                                                                                                                                                                                                                                                                                                                                                                                                                                                                               |
| SLC9A1   |                                                                      |                                                                                                                                                                                                                                                                                                                                                                                                                                                                                                                                                                                                                                                                                                                                                                                                                                                                                                                                                                                                                                                                                                                                                    |
| SLC9A2   | Solute carrier family 9, subfamily A (NHE2)                          | NHE2                                                                                                                                                                                                                                                                                                                                                                                                                                                                                                                                                                                                                                                                                                                                                                                                                                                                                                                                                                                                                                                                                                                                               |
| SLC9A3R1 | Solute carrier family 9, subfamily A (NHE3)                          | EBP50, NHERF, NHERF-1, NHERF1, NPHLOP2                                                                                                                                                                                                                                                                                                                                                                                                                                                                                                                                                                                                                                                                                                                                                                                                                                                                                                                                                                                                                                                                                                             |
| SLC9A6   | Solute carrier family 9, subfamily A (NHE6)                          | RP11-274K13.1, MRSA, NHE6                                                                                                                                                                                                                                                                                                                                                                                                                                                                                                                                                                                                                                                                                                                                                                                                                                                                                                                                                                                                                                                                                                                          |
| SLC9A8   | Solute carrier family 9, subfamily A (NHE8)                          | RP5-963K23.3, NHE-8, NHE8                                                                                                                                                                                                                                                                                                                                                                                                                                                                                                                                                                                                                                                                                                                                                                                                                                                                                                                                                                                                                                                                                                                          |
| SLCO1A2  | Solute carrier organic anion transporter family, member 1A2          | OATP, OATP-A, OATP1A2, SLC21A3                                                                                                                                                                                                                                                                                                                                                                                                                                                                                                                                                                                                                                                                                                                                                                                                                                                                                                                                                                                                                                                                                                                     |
| SLCO1B1  | Solute carrier organic anion transporter family, member 1B1          | IBLKK, LST-1, LST1, OATP-C, OATP1B1, OATP2, OATP3, SLC21A6                                                                                                                                                                                                                                                                                                                                                                                                                                                                                                                                                                                                                                                                                                                                                                                                                                                                                                                                                                                                                                                                                         |
| SLCO3A1  | Solute carrier organic anion transporter family, member 3A1          | OATP-D, OATP3A1, OATPD, SLC21A11                                                                                                                                                                                                                                                                                                                                                                                                                                                                                                                                                                                                                                                                                                                                                                                                                                                                                                                                                                                                                                                                                                                   |
| SLCO4A1  | Solute carrier organic anion transporter family, member 4A1          | OATP-E, OATP1, OATP4A1, OATPE, OATP1F1, OATP1F2, OATP1F3, OATP1F4, OATP1F5, OATP1F6, OATP1F7, OATP1F8, OATP1F9, OATP1F10, OATP1F11, OATP1F12, OATP1F13, OATP1F14, OATP1F15, OATP1F16, OATP1F17, OATP1F18, OATP1F19, OATP1F20, OATP1F21, OATP1F22, OATP1F23, OATP1F24, OATP1F25, OATP1F26, OATP1F27, OATP1F28, OATP1F29, OATP1F30, OATP1F31, OATP1F32, OATP1F33, OATP1F34, OATP1F35, OATP1F36, OATP1F37, OATP1F38, OATP1F39, OATP1F40, OATP1F41, OATP1F42, OATP1F43, OATP1F44, OATP1F45, OATP1F46, OATP1F47, OATP1F48, OATP1F49, OATP1F50, OATP1F51, OATP1F52, OATP1F53, OATP1F54, OATP1F55, OATP1F56, OATP1F57, OATP1F58, OATP1F59, OATP1F60, OATP1F61, OATP1F62, OATP1F63, OATP1F64, OATP1F65, OATP1F66, OATP1F67, OATP1F68, OATP1F69, OATP1F70, OATP1F71, OATP1F72, OATP1F73, OATP1F74, OATP1F75, OATP1F76, OATP1F77, OATP1F78, OATP1F79, OATP1F80, OATP1F81, OATP1F82, OATP1F83, OATP1F84, OATP1F85, OATP1F86, OATP1F87, OATP1F88, OATP1F89, OATP1F90, OATP1F91, OATP1F92, OATP1F93, OATP1F94, OATP1F95, OATP1F96, OATP1F97, OATP1F98, OATP1F99, OATP1F100                                                                                      |
| SLCO4C1  | Solute carrier organic anion transporter family, member 4C1          | OATP-F, OATP11, OATP11M1, OATP11M2, OATP11M3, OATP11M4, OATP11M5, OATP11M6, OATP11M7, OATP11M8, OATP11M9, OATP11M10, OATP11M11, OATP11M12, OATP11M13, OATP11M14, OATP11M15, OATP11M16, OATP11M17, OATP11M18, OATP11M19, OATP11M20, OATP11M21, OATP11M22, OATP11M23, OATP11M24, OATP11M25, OATP11M26, OATP11M27, OATP11M28, OATP11M29, OATP11M30, OATP11M31, OATP11M32, OATP11M33, OATP11M34, OATP11M35, OATP11M36, OATP11M37, OATP11M38, OATP11M39, OATP11M40, OATP11M41, OATP11M42, OATP11M43, OATP11M44, OATP11M45, OATP11M46, OATP11M47, OATP11M48, OATP11M49, OATP11M50, OATP11M51, OATP11M52, OATP11M53, OATP11M54, OATP11M55, OATP11M56, OATP11M57, OATP11M58, OATP11M59, OATP11M60, OATP11M61, OATP11M62, OATP11M63, OATP11M64, OATP11M65, OATP11M66, OATP11M67, OATP11M68, OATP11M69, OATP11M70, OATP11M71, OATP11M72, OATP11M73, OATP11M74, OATP11M75, OATP11M76, OATP11M77, OATP11M78, OATP11M79, OATP11M80, OATP11M81, OATP11M82, OATP11M83, OATP11M84, OATP11M85, OATP11M86, OATP11M87, OATP11M88, OATP11M89, OATP11M90, OATP11M91, OATP11M92, OATP11M93, OATP11M94, OATP11M95, OATP11M96, OATP11M97, OATP11M98, OATP11M99, OATP11M100 |
| SLCO5A1  | Solute carrier organic anion transporter family, member 5A1          | OATP-J, OATP-RP4, OATP5A1, OATPRP4, SLC21A15                                                                                                                                                                                                                                                                                                                                                                                                                                                                                                                                                                                                                                                                                                                                                                                                                                                                                                                                                                                                                                                                                                       |
| SLFN11   | Schlafen family member 11                                            | SLFN8/9                                                                                                                                                                                                                                                                                                                                                                                                                                                                                                                                                                                                                                                                                                                                                                                                                                                                                                                                                                                                                                                                                                                                            |
| SLFN13   | Schlafen family member 13                                            | SLFN10                                                                                                                                                                                                                                                                                                                                                                                                                                                                                                                                                                                                                                                                                                                                                                                                                                                                                                                                                                                                                                                                                                                                             |
| SLFN5    | Schlafen family member 5                                             |                                                                                                                                                                                                                                                                                                                                                                                                                                                                                                                                                                                                                                                                                                                                                                                                                                                                                                                                                                                                                                                                                                                                                    |
| SLFNL1   | Schlafen-like 1                                                      | RP11-348A7.4                                                                                                                                                                                                                                                                                                                                                                                                                                                                                                                                                                                                                                                                                                                                                                                                                                                                                                                                                                                                                                                                                                                                       |
| SLIT1    | Slit homolog 1 (Drosophila)                                          | RP11-175O19.2, MEGF4, SLIL1, SLIT-1, SLIT3                                                                                                                                                                                                                                                                                                                                                                                                                                                                                                                                                                                                                                                                                                                                                                                                                                                                                                                                                                                                                                                                                                         |
| SLIT2    | Slit homolog 2 (Drosophila)                                          | SLIL3, Slit-2                                                                                                                                                                                                                                                                                                                                                                                                                                                                                                                                                                                                                                                                                                                                                                                                                                                                                                                                                                                                                                                                                                                                      |
| SLITRK1  | SLIT and NTRK-like family, member 1                                  | UNQ233/PRO266, LRRC12, TTM                                                                                                                                                                                                                                                                                                                                                                                                                                                                                                                                                                                                                                                                                                                                                                                                                                                                                                                                                                                                                                                                                                                         |
| SLITRK2  | SLIT and NTRK-like family, member 2                                  | UNQ9197/PRO34756, CXorf2, SLITL1                                                                                                                                                                                                                                                                                                                                                                                                                                                                                                                                                                                                                                                                                                                                                                                                                                                                                                                                                                                                                                                                                                                   |
| SLITRK3  | SLIT and NTRK-like family, member 3                                  |                                                                                                                                                                                                                                                                                                                                                                                                                                                                                                                                                                                                                                                                                                                                                                                                                                                                                                                                                                                                                                                                                                                                                    |
| SLK      | STE20-like kinase                                                    | LOSK, STK2, bA16H23.1, se20-9                                                                                                                                                                                                                                                                                                                                                                                                                                                                                                                                                                                                                                                                                                                                                                                                                                                                                                                                                                                                                                                                                                                      |
| SLMAP    | Sarcolemma associated protein                                        | UNQ1847/PRO3577, SLAP                                                                                                                                                                                                                                                                                                                                                                                                                                                                                                                                                                                                                                                                                                                                                                                                                                                                                                                                                                                                                                                                                                                              |
| SLN      | Sarcolipin                                                           |                                                                                                                                                                                                                                                                                                                                                                                                                                                                                                                                                                                                                                                                                                                                                                                                                                                                                                                                                                                                                                                                                                                                                    |

|         |                                                                                        |                                                                                                                     |   |
|---------|----------------------------------------------------------------------------------------|---------------------------------------------------------------------------------------------------------------------|---|
| SLTM    | SAFB-like, transcription modulator                                                     | Met                                                                                                                 |   |
| SLU7    | SLE7 splicing factor homolog (S. pneumoniae)                                           | 9G8, hSlu7                                                                                                          |   |
| SMA5    | Glucuronidase, beta pseudogene                                                         |                                                                                                                     |   |
| SMAD2   | SMAD family member 2                                                                   | JV18, JV18-1, MADH2, MADR2, hMAD-2, hSMAD2                                                                          |   |
| SMAD3   | SMAD family member 3                                                                   | HSPC193, HsT17436, JV15-2, LDS1C, LDS3, MADH3                                                                       |   |
| SMAD5   | SMAD family member 5                                                                   | DWFC, JV5-1, MADH5                                                                                                  |   |
| SMAD7   | SMAD family member 7                                                                   | CRCS3, MADH7, MADH8                                                                                                 |   |
| SMAD9   | SMAD family member 9                                                                   | KIT11-42IT11.3, MADH9, MADH9, TTHZ, SMAD8, SMAD8A, SMAD9B                                                           |   |
| SMAP1   | Small ArfGAP 1                                                                         | RP1-104A17.1, SMAP-1                                                                                                |   |
| SMARCA2 | SWI/SNF related, matrix associated, actin dependent regulator of chromatin subfamily 2 | BAF170, BKM, NCBK3, SINTZ, SINTZ2, SINTZEA, SWI7-5, BAF170A, BAK1, MKD10, KIT5Z, SINTZ, SNE2L4, SNE2L5, SWI2, SNE2L |   |
| SMARCA4 | SWI/SNF related, matrix associated, actin dependent regulator of chromatin subfamily 4 | BAF170, BAF170A, BAK1, MKD10, KIT5Z, SINTZ, SNE2L4, SNE2L5, SWI2, SNE2L                                             | √ |
| SMARCA1 | SWI/SNF related, matrix associated, actin dependent regulator of chromatin subfamily 1 | ADERM, ETL1, HEL1                                                                                                   |   |
| SMARCC2 | SWI/SNF related, matrix associated, actin dependent regulator of chromatin subfamily 2 | BAF170, CRACC2, Rsc8                                                                                                |   |
| SMARCD1 | SWI/SNF related, matrix associated, actin dependent regulator of chromatin subfamily 1 | BAF60A, CRACD1, Rsc6p                                                                                               |   |
| SMARCD3 | SWI/SNF related, matrix associated, actin dependent regulator of chromatin subfamily 3 | BAF60C, CRACD3, Rsc6p                                                                                               |   |
| SMARCE1 | SWI/SNF related, matrix associated, actin dependent regulator of chromatin subfamily 1 | BAF57                                                                                                               | √ |
| SMC1A   | Structural maintenance of chromosomes 1A                                               | KF0-29D12.1, CDLS2, DKS425E, SBT.8, SMC1, SMC1L1, SMC1L1b, SMC1B                                                    |   |
| SMC2    | Structural maintenance of chromosomes 2                                                | PRO0324, CAP-E, CAPE, SMC-2L1, SMC2                                                                                 |   |
| SMC4    | Structural maintenance of chromosomes 4                                                | CAP-C, CAPC, SMC-4L1, hCAP-C, SMC4                                                                                  |   |
| SMC6    | Structural maintenance of chromosomes 6                                                | SMC-6L1, hSMC6, SMC6                                                                                                |   |
| SMCHD1  | Structural maintenance of chromosomes 1                                                |                                                                                                                     |   |
| SMCR7   | Smith-Rigden's syndrome chromosome region, candidate 7                                 |                                                                                                                     |   |
| SMCR7L  | Smith-Rigden's syndrome chromosome region, candidate 7L                                |                                                                                                                     |   |
| SMCR8   | Smith-Rigden's syndrome chromosome region, candidate 8                                 |                                                                                                                     |   |
| SMEK1   | SMEK homolog 1, suppressor of mek1                                                     | MSTP033, FLFL1, KIAA2010, PP4R3A, smk-1, smk1                                                                       |   |
| SMEK2   | SMEK homolog 2, suppressor of mek1                                                     | FLFL2, PP4R3B, PSY2, smk1                                                                                           |   |
| SMG1    | SMG1 phosphatidylinositol 3-kinase-related                                             | 61E3.4, ATX, LIP                                                                                                    |   |
| SMG6    | SMG6 nonsense mediated mRNA decay factor                                               | C17orf31, EST1A, SMG-6, hSMG5/7a                                                                                    |   |
| SMG7    | SMG7 nonsense mediated mRNA decay factor                                               | RP1-127C7.1, C1orf16, EST1C, SGA56M                                                                                 |   |
| SMN2    | Survival of motor neuron 2, centromeric                                                | BCD541, C-BCD541, GEMIN1, SMNC, TDRD16B                                                                             |   |
| SMNDC1  | Survival motor neuron domain containing 1                                              | SMNR, SPF30, TDRD16C                                                                                                |   |
| SMPDL3A | Sphingomyelin phosphodiesterase, acid-like 3A                                          | ASM3A, ASML3a, yR36GH4.1                                                                                            |   |
| SMS     | Spermine synthase                                                                      | MRSR, SPMSY, SRS, SpS                                                                                               |   |

|             |                                                                                |                                                                                            |  |
|-------------|--------------------------------------------------------------------------------|--------------------------------------------------------------------------------------------|--|
| SMTN        | Smoothelin                                                                     |                                                                                            |  |
| SMU1        | Smu-1 suppressor of mec-8 and unc-52                                           | RP11-54K16.3, BWD, SMU-1, fSAP57                                                           |  |
| SMUG1       | Single-strand-selective monofunctional small DNA glycosylase 1                 | FDG, HMUDG, UNG3                                                                           |  |
| SMURF1      | SMAD specific E3 ubiquitin protein ligase 1                                    |                                                                                            |  |
| SMYD1       | SET and MYND domain containing 1                                               | BOP, KMT3D, ZMYND18, ZMYND22                                                               |  |
| SMYD2       | SET and MYND domain containing 2                                               | RP11-176D17.2, HSKM-B, KMT3C, ZMYND14                                                      |  |
| SNAI2       | Snail family zinc finger 2                                                     | SLUG, SLUGH1, SNAIL2, WS2D                                                                 |  |
| SNAP25      | Synaptosomal-associated protein, 25 kDa                                        | KIC-4, KIC4, SEC7, SINAI, SINAI-2, UA410N4.2, HUG8E16.2                                    |  |
| SNAP47      | Synaptosomal-associated protein, 47 kDa                                        | RP5-870F10.2, C1orf142, HEL170, SNAP-47, SVAP1                                             |  |
| SNAPC1      | Small nuclear RNA activating complex, alpha 1                                  | PTFgamma, SNAP43                                                                           |  |
| SNAPC3      | Small nuclear RNA activating complex, alpha 3                                  | RP11-307K19.1, PTFbeta, SNAP50                                                             |  |
| SNCA        | Synuclein, alpha (A4 component of amyloid precursor)                           | NACP, PARK1, PARK4, PD1                                                                    |  |
| SNCAIP      | Synuclein, alpha interacting protein                                           | SYPH1, Sph1                                                                                |  |
| SNED1       | Sushi, nidogen and EGF-like domains 1                                          | SST3, Snep                                                                                 |  |
| SNF8        | SNF8, ESCRT-II complex subunit                                                 | Dot3, EAP30, VPS22                                                                         |  |
| SNIP1       | Smad nuclear interacting protein 1                                             | RP3-423B22.3, PMRED                                                                        |  |
| SNN         | Stannin                                                                        |                                                                                            |  |
| SNORA13     | Small nucleolar RNA, H/ACA box 13                                              |                                                                                            |  |
| SNORA60     | Small nucleolar RNA, H/ACA box 60                                              |                                                                                            |  |
| SNORA74B    | Small nucleolar RNA, H/ACA box 74B                                             |                                                                                            |  |
| SNORD108    | Small nucleolar RNA, C/D box 108                                               |                                                                                            |  |
| SNORD116-12 | Small nucleolar RNA, C/D box 116-12                                            |                                                                                            |  |
| SNORD116-21 | Small nucleolar RNA, C/D box 116-21                                            |                                                                                            |  |
| SNORD19B    | Small nucleolar RNA, C/D box 19B                                               |                                                                                            |  |
| SNORD56B    | Small nucleolar RNA, C/D box 56B                                               |                                                                                            |  |
| SNORD94     | Small nucleolar RNA, C/D box 94                                                |                                                                                            |  |
| SNRNP200    | Small nuclear ribonucleoprotein 200 kDa (U15)                                  | ASCC3L1, BRR2, HELIC2, RP33, U5-200KD                                                      |  |
| SNRNP27     | Small nuclear ribonucleoprotein 27 kDa (U17/U15)                               | 27K, RY1                                                                                   |  |
| SNRNP48     | Small nuclear ribonucleoprotein 48 kDa (U11/U12)                               | RP3-336K20__B.1, C6orf151, dJ336K20B.1, dJ512B11.2                                         |  |
| SNRPE       | Small nuclear ribonucleoprotein polypeptide E                                  | B-raf, HYPT11, SME, Sm-E                                                                   |  |
| SNRPN       | Small nuclear ribonucleoprotein polypeptide N                                  | HCKER3, FWCK, KI-EL, SIM-D, SIMN, SIMN1-IN, SMURF, SNBP, SNTN, DAFATB, SNT2, SNT2B1, TR-42 |  |
| SNTB1       | Syntrophin, beta 1 (dystrophin-associated protein 1, 50 kDa, beta component 1) |                                                                                            |  |
| SNTB2       | Syntrophin, beta 2 (dystrophin-associated protein 1, 50 kDa, beta component 2) | D16S2531E, EST25263, SNT2B2, SNT3, SNTL                                                    |  |



|        |                                                            |                                                                 |  |
|--------|------------------------------------------------------------|-----------------------------------------------------------------|--|
| SNTG1  | Syntrophin, gamma 1                                        | G1SYN, SYN4                                                     |  |
| SNTN   | Sentan, cilia apical structure protein                     | S100A1L, S100AL, sentan                                         |  |
| SNX1   | Sorting nexin 1                                            | HsT17379, VPS5                                                  |  |
| SNX13  | Sorting nexin 13                                           | RGS-PX1                                                         |  |
| SNX21  | Sorting nexin family member 21                             | RP3-337O18.7, C20orf161, PP3993, SNX-L, dJ337O18.4              |  |
| SNX22  | Sorting nexin 22                                           |                                                                 |  |
| SNX27  | Sorting nexin family member 27                             | RP11-98D18.12-005, MRT1, MY014                                  |  |
| SNX29  | Sorting nexin 29                                           | A-388D4.1, RUNDC2A                                              |  |
| SNX30  | Sorting nexin family member 30                             | RP11-408O19.4, ATG24A                                           |  |
| SNX31  | Sorting nexin 31                                           |                                                                 |  |
| SNX32  | Sorting nexin 32                                           | SNX6B                                                           |  |
| SNX33  | Sorting nexin 33                                           | SH3PX3, SH3PXD3C, SNX30                                         |  |
| SNX4   | Sorting nexin 4                                            | ATG24B                                                          |  |
| SNX5   | Sorting nexin 5                                            | RP11-504H3.2                                                    |  |
| SNX6   | Sorting nexin 6                                            | MSTP010, TFAF2                                                  |  |
| SNX9   | Sorting nexin 9                                            | RP11-200C7.10-001, SDF1, SDF1A1, SDF1AD3A, WSP                  |  |
| SOAT1  | Sterol O-acyltransferase 1                                 | RP11-215J23.1, ACAC1, ACAT, ACAT-1, ACAT1, COAT, STAT           |  |
| SOAT2  | Sterol O-acyltransferase 2                                 | ACACT2, ACAT2, ARGP2                                            |  |
| SOBP   | Sine ocans binding protein homolog (Drosophila)            | RP1-47M23.2, JXC1, MRAMS                                        |  |
| SOCS2  | Suppressor of cytokine signaling 2                         | CIS2, Cish2, SOCS-2, SSI-2, SSI2, STAT2                         |  |
| SOCS3  | Suppressor of cytokine signaling 3                         | ATOD4, CIS3, Cish3, SOCS-3, SSI-3, SSI3                         |  |
| SOCS4  | Suppressor of cytokine signaling 4                         | SOCS7                                                           |  |
| SOCS5  | Suppressor of cytokine signaling 5                         | CIS6, CISH6, Cish5, SOCS-5                                      |  |
| SOCS6  | Suppressor of cytokine signaling 6                         | CIS-4, CIS4, HSPC000, SOCS-4, SOCS-0, SOCS4, SSI4, STAT4, STAT4 |  |
| SOD2   | Superoxide dismutase 2, mitochondrial                      | RP1-56L9.2, IPOB, MNSOD, MVCD6                                  |  |
| SOD3   | Superoxide dismutase 3, extracellular                      | EC-SOD                                                          |  |
| SON    | SON DNA binding protein                                    | HSPC310, BASS1, C21orf50, DBP-5, NREBP3, SON                    |  |
| SORBS2 | Sorbin and SH3 domain containing 2                         | ARGBP2, PRO0618                                                 |  |
| SORBS3 | Sorbin and SH3 domain containing 3                         | SCAM-1, SCAM1, SH3D4                                            |  |
| SORCS1 | Sorbin-related VPS10 domain containing                     | RP11-446H13.1, hSorCS                                           |  |
| SORCS3 | Sorbin-related VPS10 domain containing member 3            | RP11-107L7.1, SORCS                                             |  |
| SORD   | Sorbitol dehydrogenase                                     | HEL-S-95n1, SORD                                                |  |
| SORL1  | Sorbin-related receptor, L(DLK class) A repeats containing | C11orf32, LR11, LRP9, SORLA, SorLA-1, gp250                     |  |

|         |                                         |                                                        |  |
|---------|-----------------------------------------|--------------------------------------------------------|--|
| SORT1   | Sortilin 1                              | Gp95, LDLCQ6, NT3                                      |  |
| SOS1    | Son of sevenless homolog 1 (Drosophila) | GF1, GGF1, GINGF, HGF, NS4                             |  |
| SOS2    | Son of sevenless homolog 2 (Drosophila) |                                                        |  |
| SOSTDC1 | Sclerostin domain containing 1          | CDA019, ECTODIN, USAG1                                 |  |
| SOX11   | SRY (sex determining region Y)-box 11   | MRD27                                                  |  |
| SOX13   | SRY (sex determining region Y)-box 13   | RP11-74C13.1, ICA12, Sox-13                            |  |
| SOX17   | SRY (sex determining region Y)-box 17   | VUR3                                                   |  |
| SOX21   | SRY (sex determining region Y)-box 21   | SOX25                                                  |  |
| SOX30   | SRY (sex determining region Y)-box 30   |                                                        |  |
| SOX5    | SRY (sex determining region Y)-box 5    | RP11-444D3.1, L-SOX5, L-SOX5B, L-SOX5F                 |  |
| SOX6    | SRY (sex determining region Y)-box 6    | HSSOX6, SOXD                                           |  |
| SOX7    | SRY (sex determining region Y)-box 7    |                                                        |  |
| SOX9    | SRY (sex determining region Y)-box 9    | CMD1, CMPD1, SRA1                                      |  |
| SP1     | Sp1 transcription factor                |                                                        |  |
| SP100   | SP100 nuclear antigen                   | lysp100b                                               |  |
| SP140   | SP140 nuclear body protein              | LYSP100, LYSP100-A, LYSP100-B                          |  |
| SP140L  | SP140 nuclear body protein-like         |                                                        |  |
| SP3     | Sp3 transcription factor                | SPR2                                                   |  |
| SP5     | Sp5 transcription factor                |                                                        |  |
| SP7     | Sp7 transcription factor                | OI11, OI12, OSX, osterix                               |  |
| SPACA1  | Sperm acrosome associated 1             | RP1-23D17.2, SAMP32                                    |  |
| SPAG1   | Sperm associated antigen 1              | CILD28, CT140, HSD-3.8, SP75, TPIS                     |  |
| SPAG11B | Sperm associated antigen 11B            | EDDM2B, EP2, EP2C, EP2D, HE2, HE2C, SPAG11             |  |
| SPAG16  | Sperm associated antigen 16             | PF20, WDR29                                            |  |
| SPAG7   | Sperm associated antigen 7              | ACRP, FSA-1                                            |  |
| SPAG9   | Sperm associated antigen 9              | HLC6, CT89, HLC-0, HLC4, JIF-4, JIF4, JLF1, FHL1, PIC6 |  |
| SPATA1  | Spermatogenesis associated 1            | RP11-118B23.4, SP-2, SPAP1                             |  |
| SPATA18 | Spermatogenesis associated 18           | Mieap, SPETEX1                                         |  |
| SPATA2  | Spermatogenesis associated 2            | PD1, PPP1R145, tamo                                    |  |
| SPATA20 | Spermatogenesis associated 20           | SSP411, Tisp78                                         |  |
| SPATA22 | Spermatogenesis associated 22           | NYD-SP20, NYDSP20                                      |  |
| SPATA4  | Spermatogenesis associated 4            | SPEF1B, TSARG2                                         |  |
| SPATA5  | Spermatogenesis associated 5            | AFG2, SPAF                                             |  |

|         |                                                                       |                                          |  |
|---------|-----------------------------------------------------------------------|------------------------------------------|--|
| SPATA6  | Spermatogenesis associated 6                                          | RP11-252A4.1, HASH, SRF-1, SRF1          |  |
| SPATS2  | Spermatogenesis associated, serine-rich 2                             | Nbla00526, P59SCR, SCR59, SPATA10        |  |
| SPATS2L | Spermatogenesis associated, serine-rich 2-like                        | SP1224, DNAPTP6, SGNP                    |  |
| SPDYE1  | Speedy/KIF11G0 cell cycle regulator family member F1                  | Ringo1, SPDYE, WBSCR19                   |  |
| SPDYE2  | Speedy/KIF11G0 cell cycle regulator family member F2                  |                                          |  |
| SPDYE6  | Speedy/KIF11G0 cell cycle regulator family member F6                  | hCG_1989182                              |  |
| SPDYE8P | Speedy/KIF11G0 cell cycle regulator family member F8, pseudogene      |                                          |  |
| SPEF2   | Sperm flagellar 2                                                     | CT122, KPL2                              |  |
| SPEG    | SPEG complex locus                                                    | APEG-1, APEG1, BPEGalpha, SPEGbeta, SPEG |  |
| SPG11   | Spastic paraplegia 11 (autosomal recessive)                           | KIAA1840                                 |  |
| SPG20   | Spastic paraplegia 20 (Troyer syndrome)                               | SPARTIN, TAHCCP1                         |  |
| SPG21   | Spastic paraplegia 21 (autosomal recessive, Mearns syndrome)          | BM-019, ACP33, GL010, MAST               |  |
| SPHK2   | Sphingosine kinase 2                                                  | SK 2, SK-2, SPK 2, SPK-2                 |  |
| SPI1    | Spi-1 proto-oncogene                                                  | hCG_25181, OF, PU.1, SFPI1, SPI-1, SPI-A |  |
| SPIN1   | Spindlin 1                                                            | SPIN                                     |  |
| SPINK13 | Serine peptidase inhibitor, Kazal type 13 (mutative)                  | HBVDNAPTP1, HESPINTOR, LiESP6, SPINK5L3  |  |
| SPINK4  | Serine peptidase inhibitor, Kazal type 4                              | HEL136, PEC-60, PEC60                    |  |
| SPINK5  | Serine peptidase inhibitor, Kazal type 5                              | LEKTI, LETKI, NETS, NS, VAKTI            |  |
| SPINLW1 |                                                                       |                                          |  |
| SPIRE1  | Spire-type actin nucleation factor 1                                  | Spir-1                                   |  |
| SPIRE2  | Spire-type actin nucleation factor 2                                  | Spir-2                                   |  |
| SPOCK1  | Sparc/osteonectin, cwcv and kazal-type domain proteoglycan (testis) 1 | SPOCK, TESTICAN, TIC1                    |  |
| SPOCK3  | Sparc/osteonectin, cwcv and kazal-type domain proteoglycan (testis) 3 | UNQ409/PRO771, HSAJ1454, TES-3, TICN3    |  |
| SPON1   | Spondin 1, extracellular matrix protein                               | VSGP/F-spondin, f-spondin                |  |
| SPOPL   | Speckle-type POZ protein-like                                         | BTBD33                                   |  |
| SPP1    | Secreted phosphoprotein 1                                             | PSEC0156, BNSP, BSPI, ETA-1, OPN         |  |
| SPP2    | Secreted phosphoprotein 2, 24 kDa                                     | SPP-244, SPP2                            |  |
| SPRN    | Shadow of prion protein homolog (zebrafish)                           | SHADOO, SHO, ba108K14.1                  |  |
| SPRR1B  | Small proline-rich protein 1B                                         | CORNIFIN, GADD33, SPRR1                  |  |
| SPRY2   | Sprouty homolog 2 (Drosophila)                                        | hSPRY2                                   |  |
| SPRY4   | Sprouty homolog 4 (Drosophila)                                        | HH17                                     |  |
| SPRYD3  | SPRY domain containing 3                                              |                                          |  |
| SPSB1   | SpirA/ryanodine receptor domain and SOCS box-containing 1             | RP3-324M8.1, SSB-1, SSB1                 |  |

|         |                                                                                   |                                                                                 |   |
|---------|-----------------------------------------------------------------------------------|---------------------------------------------------------------------------------|---|
| SPTA1   | Spectrin, alpha, erythrocytic 1                                                   | EL2, HPP, HS3, SPH3, SPTA                                                       |   |
| SPTBN1  | Spectrin, beta, non-erythrocytic 1                                                | ELF, HEL102, SPTB2, betaSpII                                                    |   |
| SPTBN5  | Spectrin, beta, non-erythrocytic 5                                                | BSPECV, HUBSPECV, HUSPECV                                                       |   |
| SPTLC1  | Serine palmitoyltransferase, long chain base                                      | KP11-118F2.1, HSN1C, HSN1, LCB1, LCB2, SPT1, SPTL                               |   |
| SPTLC2  | Serine palmitoyltransferase, long chain base                                      | HSN1C, LCB2, LCB2A, NSAN1C, SPT2, hLCB2a                                        |   |
| SPTLC3  | Serine palmitoyltransferase, long chain base                                      | KP3-107712.1, C200H36, LCB2B, LCB3, SPT3, SPTLC3L, J1719D11, J1719D11.1, hLCB2b |   |
| SPTY2D1 | SP12, Suppressor of Ty, domain containing 1 (S. pombe)                            |                                                                                 |   |
| SR140   |                                                                                   |                                                                                 |   |
| SRCAP   | Snf2-related CREBBP activator protein                                             | DOMO1, EAF1, FLHS, SWR1                                                         |   |
| SRCIN1  | SRC kinase signaling inhibitor 1                                                  | P140, SNIP                                                                      |   |
| SRD5A1  | Steroid-5-alpha-reductase, alpha polypeptide                                      | S5AR 1                                                                          |   |
| SREBF2  | Steroid regulatory element binding factor 2                                       | CTA-250D10.14-005, SREBP-2, SREBP2, bHLHd2                                      |   |
| SRF     | Serum response factor (c-fos serum response element binding transcription factor) | MCM1                                                                            |   |
| SRFBP1  | Serum response factor binding protein 1                                           | BUD22, P49, Rlb1, STRAP, p49/STRAP                                              |   |
| SRGAP1  | SEIT-KODD KIB GTPase activating protein 1                                         | ARHGAP13                                                                        |   |
| SRGAP2  | SEIT-KODD KIB GTPase activating protein 2                                         | KP11-31207.2, ARHGAP34, FNBP2A, SRGAP3, SRGAP2                                  |   |
| SRGAP3  | SEIT-KODD KIB GTPase activating protein 3                                         | ARHGAP14, MEGAP, SRGAP2, WRP                                                    | √ |
| SRGN    | Serglycin                                                                         | PPG, PRG, PRG1                                                                  |   |
| SRI     | Sorcin                                                                            | CP-22, CP22, SCN, V19                                                           |   |
| SRPK1   | SRSF protein kinase 1                                                             | RP3-422H11.1, SFRSK1                                                            |   |
| SRPK2   | SRSF protein kinase 2                                                             | SFRSK2                                                                          |   |
| SRPR    | Signal recognition particle receptor (docking protein)                            |                                                                                 |   |
| SRR     | Serine racemase                                                                   | ILV1, ISO1                                                                      |   |
| SRRM1   | Serine/arginine repetitive matrix 1                                               | 160-KD, POP101, SRM160                                                          |   |
| SRRM4   | Serine/arginine repetitive matrix 4                                               | KIAA1853, MU-MB-2.76, nSR100                                                    |   |
| SS18L1  | Synovial sarcoma translocation gene on chromosome 18 like 1                       | RP5-1005F21.1, CREST, LP2261                                                    | √ |
| SS18L2  | Synovial sarcoma translocation gene on chromosome 18 like 2                       | KIAA-iso                                                                        |   |
| SSB     | Sjogren syndrome antigen B (autoantigen)                                          | LARP3, La, La/SSB                                                               |   |
| SSBP1   | Single-stranded DNA binding protein 1, mitochondrial                              | Mt-SSB, SOSS-B1, SSBP, mtSSB                                                    |   |
| SSBP2   | Single-stranded DNA binding protein 2                                             | HSPC116, SOSS-B2                                                                |   |
| SSFA2   | Sperm specific antigen 2                                                          | CS-1, CS1, KRAP, SPAG13                                                         |   |
| SSH2    | Slingshot protein phosphatase 2                                                   | SSH-2, SSH-2L                                                                   |   |
| SSPN    | Sarcospan                                                                         | DAGA5, KRAG, NSPN, SPN1, SPN2                                                   |   |

|            |                                                                                  |                                                                           |   |
|------------|----------------------------------------------------------------------------------|---------------------------------------------------------------------------|---|
| SSR1       | Signal sequence receptor, alpha                                                  | PSEC0262, TRAPA                                                           |   |
| SSR2       | Signal sequence receptor, beta (transmembrane protein)                           | HSD25, TLAP, TRAP-BETA, TRAPB                                             |   |
| SSR3       | Signal sequence receptor, gamma (transmembrane protein associated protein gamma) | TRAPG                                                                     |   |
| SSTR2      | Somatostatin receptor 2                                                          |                                                                           |   |
| SSX2IP     | Synovial sarcoma, X breakpoint 2 interacting protein                             | ADIP                                                                      |   |
| SSX9       | Synovial sarcoma, X breakpoint 9                                                 | RP11-344N17.10-001                                                        |   |
| ST3GAL1    | ST3 beta-galactosidase alpha-2,3-                                                | Gal-NAC6S, SIAT4A, SIAT1L, ST3GalA, ST3GalA.1, ST2G-IIA, ST2G-IIA.1, ST2G |   |
| ST3GAL3    | ST3 beta-galactosidase alpha-2,3-                                                | EIEE15, MRT12, SIAT6, ST3GALII, ST3GalIII, ST3N                           |   |
| ST6GAL2    | ST6 beta-galactosaminidase alpha-2,6-                                            | SIAT2, ST6GalII                                                           |   |
| ST6GALNAC3 | ST6 (alpha-N-acetylneuraminyl-2,3-beta-D-glucosyl-1,2)-N-acetylglucosaminidase   | UNQ2787/PRO1111, PRO1111, SIAT7C, ST6GALNACIII, STX                       |   |
| ST6GALNAC5 | ST6 (alpha-N-acetylneuraminyl-2,3-beta-D-glucosyl-1,2)-N-acetylglucosaminidase   | RP4-564M11.3, SIAT7E, ST6GalNAcV                                          |   |
| ST7        | Suppression of tumorigenicity 7                                                  | ETS7q, FAM4A, FAM4A1, HELG, RAY1, SEN4, TSG7                              |   |
| ST8SIA1    | ST8 alpha-N-acetylneuraminidase alpha-2,6-                                       | GD3S, SIAT8, SIAT8-A, SIAT8A, ST8SiaI                                     |   |
| ST8SIA2    | ST8 alpha-N-acetylneuraminidase alpha-2,6-                                       | UNQ3057, HsT19690, SIAT8B, ST8SIA-II, STX                                 |   |
| ST8SIA3    | ST8 alpha-N-acetylneuraminidase alpha-2,6-                                       | SIAT8C, ST8SiaIII                                                         |   |
| ST8SIA4    | ST8 alpha-N-acetylneuraminidase alpha-2,6- sialyltransferase 4                   | PST, PST1, SIAT8D, ST8SIA-IV                                              |   |
| STAC2      | SH3 and cysteine rich domain 2                                                   | 24b2, 24b2/STAC2                                                          |   |
| STAC3      | SH3 and cysteine rich domain 3                                                   | NAM                                                                       |   |
| STAG1      | Stromal antigen 1                                                                | SA1, SCC3A                                                                |   |
| STAG3      | Stromal antigen 3                                                                |                                                                           |   |
| STAG3L4    | Stromal antigen 3-like 4 (pseudogene)                                            | STAG3L4P                                                                  |   |
| STAM2      | Signal transducing adaptor molecule (SH3 domain and ITAM motif)                  | HbpA, STAM2B, STAM2                                                       |   |
| STAMBPL1   | STAM binding protein-like 1                                                      | ALMalpha, AMSH-FP, AMSH-LP, bA399O19.2                                    |   |
| STARD13    | STARK-related lipid transfer (START) domain containing 13                        | RP11-81F11.1, ARHGAP37, DLC2, GT650, LINC00464                            |   |
| STARD3     | STARK-related lipid transfer (START) domain containing 3                         | CAB1, MLN64, es64                                                         |   |
| STARD3NL   | STARD3 N-terminal like                                                           | UNQ855/PRO1864, MENTHO                                                    |   |
| STARD4     | STARK-related lipid transfer (START) domain containing 4                         |                                                                           |   |
| STARD8     | STARK-related lipid transfer (START) domain containing 8                         | ARHGAP38, DLC3, STARTGAP3                                                 |   |
| STARD9     | STARK-related lipid transfer (START) domain containing 9                         |                                                                           |   |
| STAT1      | Signal transducer and activator of transcription 1                               | CAND17, IMD31A, IMD31B, IMD31C, ISGF-3, STAT1                             |   |
| STAT3      | Signal transducer and activator of transcription 3                               | APRF, HIES                                                                | √ |
| STAT4      | Signal transducer and activator of transcription 4                               | SLEB11                                                                    |   |
| STAU1      | Staufen double-stranded RNA binding protein 1                                    | RP3-470L14.2, PPP1R150, STAU                                              |   |

|         |                                                |                                                               |  |
|---------|------------------------------------------------|---------------------------------------------------------------|--|
| STAU2   | Staufen double-stranded RNA binding protein 2  |                                                               |  |
| STBD1   | Starch binding domain 1                        | GENX-3414, GENEX3414                                          |  |
| STC1    | Stanniocalcin 1                                | STC                                                           |  |
| STC2    | Stanniocalcin 2                                | STC-2, STCRP                                                  |  |
| STEAP2  | STEAP family member 2, metalloredutase         | UNQ0507/TKO23205, IFCAT, FCANAF1, FUMFCU, STAMP1, STMP        |  |
| STEAP3  | STEAP family member 3, metalloredutase         | AHMIO2, STMP3, TSAP6, dudlin-2                                |  |
| STEAP4  | STEAP family member 4                          | STAMP2, TIARP, TNFAIP9                                        |  |
| STELLAR |                                                |                                                               |  |
| STIM2   | Stromal interaction molecule 2                 |                                                               |  |
| STK10   | Serine/threonine kinase 10                     | LOK, PRO2729                                                  |  |
| STK11IP | Serine/threonine kinase 11 interacting protein | LIP1, LKB1IP1, STK11IP                                        |  |
| STK16   | Serine/threonine kinase 16                     | KRCT, MPSK, PKL12, TSF1                                       |  |
| STK17A  | Serine/threonine kinase 17a                    | DRAK1                                                         |  |
| STK17B  | Serine/threonine kinase 17b                    | DRAK2                                                         |  |
| STK24   | Serine/threonine kinase 24                     | KP11-111E24.5, HEL-3-95, MST3, MST3B, STE20, STK2             |  |
| STK25   | Serine/threonine kinase 25                     | SOK1, YSK1                                                    |  |
| STK32A  | Serine/threonine kinase 32A                    | YANK1                                                         |  |
| STK32C  | Serine/threonine kinase 32C                    | RP11-140A10.1, PKE, YANK3                                     |  |
| STK38   | Serine/threonine kinase 38                     | NDR, NDR1                                                     |  |
| STK38L  | Serine/threonine kinase 38 like                | NDR2                                                          |  |
| STK39   | Serine threonine kinase 39                     | DCHT, PASK, SPAK                                              |  |
| STK4    | Serine/threonine kinase 4                      | KRS2, MST1, TIAC, YSK3                                        |  |
| STMN1   | Stathmin 1                                     | KP11-125B.5, C10H215, LAP16, Lag, OT16, P117, P119, PR22, SMN |  |
| STMN2   | Stathmin 2                                     | SCG10, SCGN10                                                 |  |
| STOM    | Stomatin                                       | RP11-342H3.1, BND7, EPB7, EPB72                               |  |
| STOML3  | Stomatin (EPB72)-like 3                        | RP11-50D16.1, Epb7.2l, SRO                                    |  |
| STON1   | Stonin 1                                       | SALF, SBLF, STN1, STNB1                                       |  |
| STON2   | Stonin 2                                       | STN2, STNB, STNB2                                             |  |
| STOX1   | Storkhead box 1                                | RP11-314J18.7, C10orf24, PEE4                                 |  |
| STOX2   | Storkhead box 2                                |                                                               |  |
| STRBP   | Spermatid perinuclear RNA binding protein      | HEL162, ILF3L, SPNR, p74                                      |  |
| STRN3   | Striatin, calmodulin binding protein 3         | SG2NA                                                         |  |
| STS     | Steroid sulfatase (microsomal), isozyme S      | ARSC, ARSC1, ASC, ES, SSDD, XLI                               |  |

|         |                                                     |                                                |   |
|---------|-----------------------------------------------------|------------------------------------------------|---|
| STT3A   | STT3A, subunit of the                               | ITM1, STT3-A, TMC                              |   |
| STUB1   | STUB1 homology and C-box containing                 | LATOC-STUB1.0, CHH1, HSPADP2, NF-CO-1, SCAR10, |   |
| STX11   | Syntaxin 11                                         | SDGCAG7, UBOY1                                 |   |
| STX12   | Syntaxin 12                                         | FHL4, HLH4, HPLH4                              |   |
| STX16   | Syntaxin 16                                         | RP3-426I6.4, STX13, STX14                      |   |
| STX17   | Syntaxin 17                                         | RP11-261P9.3, SYN16                            |   |
| STX1B   | Syntaxin 1B                                         | STX1B12, STX1B                                 |   |
| STX2    | Syntaxin 2                                          | EPIM, EPMA, STX2B, STX2C, STX2                 |   |
| STX3    | Syntaxin 3                                          | STX3A                                          |   |
| STX6    | Syntaxin 6                                          |                                                |   |
| STX7    | Syntaxin 7                                          | RP11-560I21.1                                  |   |
| STXBP3  | Syntaxin binding protein 3                          | MUNC18-3, MUNC18C, PSP, UNC-18C                |   |
| STXBP4  | Syntaxin binding protein 4                          | Synip                                          |   |
| STXBP5  | Syntaxin binding protein 5 (tomosyn)                | RP11-361F15.2, LGL3, LLGL3, Nbla04300          |   |
| STXBP5L | Syntaxin binding protein 5-like                     | LLGL4                                          |   |
| STYK1   | Serine/threonine/tyrosine kinase 1                  | NOK, SuRTK106                                  |   |
| STYX    | Serine/threonine/tyrosine interacting protein       |                                                |   |
| SUB1    | SUB1 homolog ( <i>S. cerevisiae</i> )               | P15, PC4, p14                                  |   |
| SUCLA2  | Succinate-CoA ligase, ADP-forming, beta             | RP11-528D24.2, A-BETA, MTDPS5, SCS-betaA       |   |
| SUCLG2  | Succinate-CoA ligase, GDP-forming, beta             | GBETA                                          |   |
| SUCNR1  | Succinate receptor 1                                | GPR91                                          |   |
| SUDS3   | Suppressor of defective silencing 3 homolog         | SAP45, SDS3                                    |   |
| SUFU    | Suppressor of fused homolog ( <i>Drosophila</i> )   | RP11-47A8.1, PRO1280H, SUFUXL, SUFU            | √ |
| SUGT1   | SGT1, suppressor of G2 allele of SKI1 ( <i>S.</i>   | RP11-93H24.2, SGT1                             |   |
| SULF1   | Sulfatase 1                                         | HSULF-1, SULF-1                                |   |
| SULT1C2 | Sulfotransferase family, cytosolic, 1C,             | ST1C1, ST1C2, SULT1C1, humSULTC2               |   |
| SULT1C4 | Sulfotransferase family, cytosolic, 1C,             | SULT1C, SULT1C2                                |   |
| SULT4A1 | Sulfotransferase family 4A, member 1                | BR-SULF1, BRSTL1, DJ388M3.3, NS1, SULTA3, HBR- |   |
| SUMF1   | Sulfatase modifying factor 1                        | UNQ3037, AAPA3037, FGE                         |   |
| SUMF2   | Sulfatase modifying factor 2                        | PSEC0171, Pfgc                                 |   |
| SUMO3   | small ubiquitin-like modifier 3                     | SMT3A, SMT3H1, SUMO-3, Smt3B                   |   |
| SUPT3H  | Suppressor of Ty 3 homolog ( <i>S. cerevisiae</i> ) | RP11-169I2.1, SPT3, SPT3L                      |   |
| SUPT7L  | Suppressor of Ty 7 ( <i>S. cerevisiae</i> )-like    | SPT7L, STAF65, STAF65(gamma), STAF65G, SUPT7H  |   |

|          |                                              |                                                   |   |
|----------|----------------------------------------------|---------------------------------------------------|---|
| SUSD4    | Sushi domain containing 4                    | RP11-239E10.4, PRO222                             |   |
| SUSD5    | Sushi domain containing 5                    | Gm1126                                            |   |
| SUV39H1  | Suppressor of variegation 3-9 homolog 1      | H3-K9-HMTase 1, KMT1A, MG44, SUV39H               |   |
| SUV420H1 | Suppressor of variegation 4-20 homolog 1     | CGI-85, CGI85, KMT5B                              |   |
| SUZ12    | SUZ12 polycomb repressive complex 2          | CHET9, JJAZ1                                      | √ |
| SUZ12P   | Suppressor of zeste 12 homolog pseudogene 1  | SUZ12P                                            |   |
| SV2A     | Synaptic vesicle glycoprotein 2A             | PSEC0174, SV2                                     |   |
| SV2B     | Synaptic vesicle glycoprotein 2B             | HsT19680                                          |   |
| SVIP     | Small VCP/p97-interacting protein            |                                                   |   |
| SWAP70   | SWAP switching D-cell complex 70 kDa subunit | HSPC321, SWAP-70                                  |   |
| SYCP1    | Synaptonemal complex protein 1               | RP11-109G4.1, CT8, HOM-TE5-14, SCP-1, SCP1        |   |
| SYCP2    | Synaptonemal complex protein 2               | RP5-884F15.1, SCP2                                |   |
| SYF2     | SYF2 pre-mRNA-splicing factor                | CBPIN, NTC31, P29, fSAP29                         |   |
| SYK      | Spleen tyrosine kinase                       | p72-Syk                                           | √ |
| SYN2     | Synapsin II                                  | SYNII                                             |   |
| SYNC     | Syncoilin, intermediate filament protein     | SYNC1OILIN, SYNC                                  |   |
| SYNCRIP  | Synaptotagmin binding, cytoplasmic RNA       | RP11-5317.2, GKT-RDI, GKT-RDI, HINKR1Q, HINKR1Q1, |   |
| SYNE1    | Spectrin repeat containing, nuclear envelope | NS1-P50E4.2, db, NRC-A1, COO198, CUG2, EDMD4,     |   |
| SYNE2    | Spectrin repeat containing, nuclear envelope | EDMD3, NCA1, NCANL, H45H2, Nesprin-2, SYNE-2,     |   |
| SYNJ1    | Synaptojanin 1                               | INPP5G, PARK20                                    |   |
| SYNJ2BP  | Synaptojanin 2 binding protein               | ARIP2, OMP25                                      |   |
| SYNM     | Synemin, intermediate filament protein       | DMN, SYN                                          |   |
| SYNPO2   | Synaptopodin 2                               |                                                   |   |
| SYNPO2L  | Synaptopodin 2-like                          |                                                   |   |
| SYNPR    | Synaptoporin                                 | SPO                                               |   |
| SYNRG    | synergin, gamma                              | AP1GBP1, SYNG                                     |   |
| SYPL1    | Synaptophysin-like 1                         | H-SP1, SYPL                                       |   |
| SYPL2    | Synaptophysin-like 2                         | UNQ6348, MG29                                     |   |
| SYT1     | Synaptotagmin I                              | P65, SVP65, SYT                                   |   |
| SYT14    | Synaptotagmin XIV                            | SCAR11, sytXIV                                    |   |
| SYT15    | Synaptotagmin XV                             | RP11-38L15.7, CHR10SYT, sytXV                     |   |
| SYT16    | Synaptotagmin XVI                            | CHR14SYT, SYT14L, Strep14, syt14r, yt14r          |   |
| SYT2     | Synaptotagmin II                             | SytII                                             |   |



|        |                                                                                |                                                 |   |
|--------|--------------------------------------------------------------------------------|-------------------------------------------------|---|
| SYT3   | Synaptotagmin III                                                              | SytIII                                          |   |
| SYT4   | Synaptotagmin IV                                                               | HsT1192                                         |   |
| SYT7   | Synaptotagmin VII                                                              | IPCA-7, IPCA7, PCANAP7, SYT-VII, SYTVII         |   |
| SYTL2  | Synaptotagmin-like 2                                                           | CHR11SYT, EXO4, PPP1R151, SGA72M, SLP2, SLP2A   |   |
| SYTL4  | Synaptotagmin-like 4                                                           | RP11-524D16__A.2, SLP4                          |   |
| T      | T, brachyury homolog (mouse)                                                   | RP11-459F1.1, SAVAF1, T                         |   |
| TAB1   | TGF-beta activated kinase 1/MAF3K7                                             | RP3-407F17.2, 3'-Tab1, MAP3K7IP1                |   |
| TAB2   | TGF-beta activated kinase 1/MAF3K7                                             | RP1-111D6.3, CHTD2, MAP3K7IP2, TAB-2            |   |
| TAB3   | TGF-beta activated kinase 1/MAF3K7                                             | MAP3K7IP3, NAP1                                 |   |
| TACC1  | transforming, acidic coiled-coil containing protein 2                          | Ga55                                            |   |
| TACC2  | transforming, acidic coiled-coil containing protein 2                          | RP11-296H2.1, AZU-1, ECTACC                     |   |
| TACR1  | Tachykinin receptor 1                                                          | NK1R, NKIR, SPR, TAC1R                          |   |
| TADA1  | Transcriptional adaptor 1                                                      | RP1-9E21.4, ADA1, HF11, STAF42L, hADA1, TADA1   |   |
| TADA2A | Transcriptional adaptor 2A                                                     | KL04P, ADA2, ADA2A, TADA2L, hADA2               |   |
| TADA2B | Transcriptional adaptor 2B                                                     | ADA2(beta), ADA2B                               |   |
| TAF15  | TAF15 RNA polymerase II, TATA box                                              | Npl3, RBP56, TAF2N, TAFII68                     | v |
| TAF1A  | TATA box binding protein (TBP)-associated factor 1A                            | RP11-378J18.2, MGC:17061, RAFI48, SL1, TAFI48   |   |
| TAF1D  | TATA box binding protein (TBP)-associated factor 2 RNA polymerase II, TATA box | JOSD3, RAFI41, TAF(D)41, TAFI41                 |   |
| TAF2   | TAF2 RNA polymerase II, TATA box                                               | CIF150, MRT40B, TAFIII150, TAF2                 |   |
| TAF4   | TAF4 RNA polymerase II, TATA box                                               | K15-1107C24.1, TAF2C, TAF2CIA, TAFIII50,        |   |
| TAF4B  | TAF4 RNA polymerase II, TATA box                                               | TAFII125, TAF4                                  |   |
| TAF5   | TAF5 RNA polymerase II, TATA box                                               | SPGF13, TAF2C2, TAFIII105                       |   |
| TAF5L  | TAF5-like RNA polymerase II, p500/CBF1                                         | TAF2D, TAFII100                                 |   |
| TAF7   | TAF7 RNA polymerase II, TATA box                                               | RP4-613A2.4, PAF65B                             |   |
| TAF8   | TAF8 RNA polymerase II, TATA box                                               | TAF2F, TAFII55                                  |   |
| TAF9   | TAF9 RNA polymerase II, TATA box                                               | 43, II, TAF, TAFII-43, TAFII43, TBN             |   |
| TAF9B  | TAF9B RNA polymerase II, TATA box                                              | AD-004, MGC:5007, STAF51/52, TAF2G, TAFII-51,   |   |
| TAF9B  | TAF9B RNA polymerase II, TATA box                                              | TAFII-22, TAFII31, TAFII23, TAFII23,            |   |
| TAF9B  | TAF9B RNA polymerase II, TATA box                                              | RP4-576LT2.2, DN-7, DN7, TAF9E, TAFII51E, ITID- |   |
| TAGAP  | T-cell activation (TRD) kinase activating protein                              | FKSG15, ARHGAP47, IDDM211, TAGAP                |   |
| TAGLN2 | Transgelin 2                                                                   | RP11-48O20.1, HA1756                            |   |
| TAGLN3 | Transgelin 3                                                                   | NP22, NP24, NP25                                |   |
| TAL2   | T-cell acute lymphocytic leukemia 2                                            |                                                 | v |
| TALDO1 | Transaldolase 1                                                                | TAL, TAL-H, TALDOR, TALH                        |   |
| TANC1  | tetratricopeptide repeat, ankyrin repeat and coiled-coil containing 1          | ROLSB, TANC                                     |   |

|          |                                                                                                       |                                                                                 |   |
|----------|-------------------------------------------------------------------------------------------------------|---------------------------------------------------------------------------------|---|
| TANC2    | Tetraucopptide repeat, ankyrin repeat and transporter 1, ATP-binding cassette, sub-family D (MDR/TAP) | ROLSA, rols                                                                     |   |
| TAP1     | Transporter 1, ATP-binding cassette, sub-family D (MDR/TAP)                                           | DAAF-57C1.3, ADC17, ADCB2, APT1, D0S114E, FST-1, PSF1, PING4*0102N, TAD1N, TAP1 |   |
| TAP2     | Transporter 2, ATP-binding cassette, sub-family D (MDR/TAP)                                           | DAAF-57C1.2, ADC18, ADCB3, APT2, D0S217E, FST-2, PSF2, PING11                   |   |
| TAPT1    | Transmembrane anterior posterior transformation 1                                                     | CMVFR                                                                           |   |
| TARDBP   | TAR DNA binding protein                                                                               | RP4-635E18.2, ALS10, TDP-43                                                     |   |
| TAS2R20  | Taste receptor, type 2, member 20                                                                     | T2R20, T2R49, T2R56, TAS2R49                                                    |   |
| TATDN3   | TatD DNase domain containing 3                                                                        |                                                                                 |   |
| TAX1BP3  | TAX1 (human T-cell leukemia virus type 1) TBC1 (tre-2/0318, DDB2, cdc16) domain family, member 1      | TIP-1                                                                           |   |
| TBC1D1   | TBC1 domain family, member 1                                                                          | TBC, TBC1                                                                       |   |
| TBC1D13  | TBC1 domain family, member 13                                                                         | RP11-545E17.5                                                                   |   |
| TBC1D14  | TBC1 domain family, member 14                                                                         |                                                                                 |   |
| TBC1D15  | TBC1 domain family, member 15                                                                         | RAB7-GAP                                                                        |   |
| TBC1D20  | TBC1 domain family, member 20                                                                         | RP5-852M4.5, C20orf140, WARBM4                                                  |   |
| TBC1D22B | TBC1 domain family, member 22B                                                                        | RP4-744I24.2, C6orf197, dJ744I24.2                                              |   |
| TBC1D26  | TBC1 domain family, member 26                                                                         |                                                                                 |   |
| TBC1D2B  | TBC1 domain family, member 2B                                                                         |                                                                                 |   |
| TBC1D3   | TBC1 domain family, member 3                                                                          |                                                                                 |   |
| TBC1D30  | PRC17A, TBC1D3F, TBC1D3                                                                               |                                                                                 |   |
| TBC1D4   | TBC1 domain family, member 4                                                                          | RP11-159J2.3, AS160                                                             |   |
| TBC1D5   | TBC1 domain family, member 5                                                                          |                                                                                 |   |
| TBC1D7   | TBC1 domain family, member 7                                                                          | HSPC239, MGCPH, PIG51, TBC7                                                     |   |
| TBC1D8B  | TBC1 domain family, member 8B (with TBC1 domain family, member 9 (with GRAM domain))                  | RP11-321G1.1                                                                    |   |
| TBC1D9   | TBC1 domain family, member 9 (with GRAM domain)                                                       | MDR1                                                                            |   |
| TBCA     | Tubulin folding cofactor A                                                                            |                                                                                 |   |
| TBCD     | Tubulin folding cofactor D                                                                            | PP1096, SSD-1, tfcD                                                             |   |
| TBCEL    | Tubulin folding cofactor E-like                                                                       | E1, LRRC35                                                                      |   |
| TBCK     | TBC1 domain containing kinase                                                                         | HSPC302L, TBCK                                                                  |   |
| TBL1X    | Transducin (beta)-like 1X-linked                                                                      | EBI, SMAP55, TBL1                                                               |   |
| TBL1XR1  | Transducin (beta)-like 1 X-linked receptor 1                                                          | C21, DC42, IRA1, TBLR1                                                          | √ |
| TBL2     | Transducin (beta)-like 2                                                                              | UNQ563/PRO1125, WBSCR13, WS-betaTRP                                             |   |
| TBP      | TATA box binding protein                                                                              | RP1-191N21.3, GTF2D, GTF2D1, HDL4, SCA17, TFIID                                 |   |
| TBPL1    | TBP-like 1                                                                                            | RP1-75H22.1, MGC:8589, MGC:9020, STOD, TBL, TBL, TBE2                           |   |
| TBRG1    | Transforming growth factor beta regulator 1                                                           | NIAM, TB-5                                                                      |   |

|        |                                                                                  |                                                                                      |   |
|--------|----------------------------------------------------------------------------------|--------------------------------------------------------------------------------------|---|
| TBX18  | T-box 18                                                                         |                                                                                      |   |
| TBX2   | T-box 2                                                                          |                                                                                      |   |
| TBX3   | T-box 3                                                                          | TBX3-ISO, UMS, XHL                                                                   |   |
| TBX4   | T-box 4                                                                          | SPS                                                                                  |   |
| TBX5   | T-box 5                                                                          | HOS                                                                                  |   |
| TBXA2R | Thromboxane A2 receptor                                                          | BDPLT13, TXA2-R                                                                      |   |
| TCAM1P | Testicular cell adhesion molecule 1, pseudogene                                  | TCAM1                                                                                |   |
| TCEA2  | Transcription elongation factor A (SII), 2                                       | RP11-299N6.2, TFIIS                                                                  |   |
| TCEANC | Transcription elongation factor A (SII) N-terminal and central domain containing |                                                                                      |   |
| TCERG1 | Transcription elongation regulator 1                                             | CA150, TAF2S, Urn1                                                                   |   |
| TCF19  | Transcription factor 19                                                          | DAMA-213L4.5, SC1, TCF-19                                                            |   |
| TCF4   | Transcription factor 4                                                           | EZF2, HIF2, HIF2, TFIIS, SET2, SET2, SET2-1, SET2-1A, SET2-1B, SET2-1D, TCF4, HHLH10 |   |
| TCF7L2 | Transcription factor 7-like 2 (T-cell specific, HMG)                             | RP11-357H24.1, TCF-4, TCF4                                                           | v |
| TCFL5  | Transcription factor-like 5 (basic helix-loop-helix)                             | CHA, E2BP-1, Figlb, bHLHe82                                                          |   |
| TCHH   | Trichohyalin                                                                     | RP11-107M16.3, THH, THL, TRHY                                                        |   |
| TCHP   | Trichoplein, keratin filament binding                                            | TpMs                                                                                 |   |
| TCL6   | T-cell leukemia/lymphoma 6 (non-protein coding)                                  | TNG1, TNG2                                                                           | v |
| TCTA   | T-cell leukemia translocation altered                                            |                                                                                      |   |
| TCTN1  | Tectonic family member 1                                                         | UNQ9369/PRO34160, JBTS13, TECT1                                                      |   |
| TCTN3  | Tectonic family member 3                                                         | RP11-7D5.3, C10orf61, JBTS18, OFD4, TECT3                                            |   |
| TDGF3  | Teratocarcinoma-derived growth factor 1 pseudogene 2                             | CK-5, CNP10, CNP10-3, CNP10S, TDGF1, TDGF2, TDGF3                                    |   |
| TDH    | L-threonine dehydrogenase (pseudogene)                                           | SDR14E1P                                                                             |   |
| TDRD1  | Tudor domain containing 1                                                        | CT41.1                                                                               |   |
| TDRD12 | Tudor domain containing 12                                                       | ECAT8                                                                                |   |
| TDRD9  | Tudor domain containing 9                                                        | C14orf75, HIG-1, NET54                                                               |   |
| TDRG1  | Testis development related 1 (non-protein coding)                                |                                                                                      |   |
| TEAD1  | TEA domain family member 1 (SV40 transcriptional enhancer factor)                | AA, NTEF-1, REF1, TCF-13, TCF13, TEAD-1, TEF-1                                       |   |
| TECPR1 | Tectonin beta-propeller repeat containing 1                                      | tcag7.876                                                                            |   |
| TECRL  | Trans-2,3-enoyl-CoA reductase-like                                               | GPSN2L, SRD5A2L2, TERL                                                               |   |
| TEF    | Thyrotrophic embryonic factor                                                    | CTA-223H9.6                                                                          |   |
| TEK    | TEK tyrosine kinase, endothelial                                                 | CD202B, TIE-2, TIE2, VMCM, VMCM1                                                     |   |
| TEKT2  | Tektin 2 (testicular)                                                            | TEKTB1, TEK TIN-T, h-tektin-t                                                        |   |
| TENC1  | Tensin like C1 domain containing chondron (tensin 2)                             | C1-TEN, C1TEN, TNS2                                                                  |   |

|          |                                                                                                                          |                                                                                                                                                                                                                                                                                                                                                                                                                                                                                                                                                                                                                                                                                                                                                  |   |
|----------|--------------------------------------------------------------------------------------------------------------------------|--------------------------------------------------------------------------------------------------------------------------------------------------------------------------------------------------------------------------------------------------------------------------------------------------------------------------------------------------------------------------------------------------------------------------------------------------------------------------------------------------------------------------------------------------------------------------------------------------------------------------------------------------------------------------------------------------------------------------------------------------|---|
| TEPP     | Testis, prostate and placenta expressed                                                                                  |                                                                                                                                                                                                                                                                                                                                                                                                                                                                                                                                                                                                                                                                                                                                                  |   |
| TES      | Testis derived transcript (3 LIM domains)                                                                                | TESSS-2, TES                                                                                                                                                                                                                                                                                                                                                                                                                                                                                                                                                                                                                                                                                                                                     |   |
| TET2     | Tet methylcytosine dioxygenase 2                                                                                         | Nbla00191, KIAA1546, MDS                                                                                                                                                                                                                                                                                                                                                                                                                                                                                                                                                                                                                                                                                                                         | √ |
| TET3     | Tet methylcytosine dioxygenase 3                                                                                         | hCG_40738                                                                                                                                                                                                                                                                                                                                                                                                                                                                                                                                                                                                                                                                                                                                        | √ |
| TEX2     | Testis expressed 2                                                                                                       | HT008, TMEM96                                                                                                                                                                                                                                                                                                                                                                                                                                                                                                                                                                                                                                                                                                                                    |   |
| TEX261   | Testis expressed 261                                                                                                     | UNQ1882/PRO4325, TEG-261                                                                                                                                                                                                                                                                                                                                                                                                                                                                                                                                                                                                                                                                                                                         |   |
| TEX9     | Testis expressed 9                                                                                                       |                                                                                                                                                                                                                                                                                                                                                                                                                                                                                                                                                                                                                                                                                                                                                  |   |
| TFAP2A   | Transcription factor AP-2 alpha (activating transcription factor AP-2 beta (activating enhancer-binding protein 2 beta)) | RP1-290I10.1, AP-2, AP-2alpha, AP2TF, BOFS, TFAP2                                                                                                                                                                                                                                                                                                                                                                                                                                                                                                                                                                                                                                                                                                |   |
| TFAP2B   | Transcription factor AP-2 beta (activating enhancer-binding protein 2 beta)                                              | RP4-753D5.1, AP-2B, AP2-B                                                                                                                                                                                                                                                                                                                                                                                                                                                                                                                                                                                                                                                                                                                        |   |
| TFCP2L1  | Transcription factor CP2-like 1                                                                                          | CRTR1, LBP-9, LBP9                                                                                                                                                                                                                                                                                                                                                                                                                                                                                                                                                                                                                                                                                                                               |   |
| TFDP1    | Transcription factor Dp-1                                                                                                | RP11-230F18.1, DP1, DRTF1, Dp-1                                                                                                                                                                                                                                                                                                                                                                                                                                                                                                                                                                                                                                                                                                                  |   |
| TFEC     | Transcription factor EC                                                                                                  | TCFEC, TFE-C-L, TFECL, bHLHe34, hTFEC-L, TFEC                                                                                                                                                                                                                                                                                                                                                                                                                                                                                                                                                                                                                                                                                                    |   |
| TFPI     | Tissue factor pathway inhibitor (inoprotein-associated coagulation inhibitor)                                            | EPI, LACI, TFII, TFPI                                                                                                                                                                                                                                                                                                                                                                                                                                                                                                                                                                                                                                                                                                                            |   |
| TFRC     | Transferrin receptor                                                                                                     | CD71, T9, TFR, TFR1, TR, TRFR, p90                                                                                                                                                                                                                                                                                                                                                                                                                                                                                                                                                                                                                                                                                                               | √ |
| TGDS     | TDP-glucose 4,6-dehydratase                                                                                              | RP11-124B17.2, SDR2E1, TDPGD                                                                                                                                                                                                                                                                                                                                                                                                                                                                                                                                                                                                                                                                                                                     |   |
| TGFA     | Transforming growth factor, alpha                                                                                        | TFGA                                                                                                                                                                                                                                                                                                                                                                                                                                                                                                                                                                                                                                                                                                                                             |   |
| TGFB2    | Transforming growth factor, beta 2                                                                                       | LDS4, TGF-beta2                                                                                                                                                                                                                                                                                                                                                                                                                                                                                                                                                                                                                                                                                                                                  |   |
| TGFB1    | Transforming growth factor, beta-induced, (8/14 LDs)                                                                     | BIGHS, CDB1, CDG2, CDG1, CSD, CSD1, CSD2, CSD3, CSD4, CSD5, CSD6, CSD7, CSD8, CSD9, CSD10, CSD11, CSD12, CSD13, CSD14, CSD15, CSD16, CSD17, CSD18, CSD19, CSD20, CSD21, CSD22, CSD23, CSD24, CSD25, CSD26, CSD27, CSD28, CSD29, CSD30, CSD31, CSD32, CSD33, CSD34, CSD35, CSD36, CSD37, CSD38, CSD39, CSD40, CSD41, CSD42, CSD43, CSD44, CSD45, CSD46, CSD47, CSD48, CSD49, CSD50, CSD51, CSD52, CSD53, CSD54, CSD55, CSD56, CSD57, CSD58, CSD59, CSD60, CSD61, CSD62, CSD63, CSD64, CSD65, CSD66, CSD67, CSD68, CSD69, CSD70, CSD71, CSD72, CSD73, CSD74, CSD75, CSD76, CSD77, CSD78, CSD79, CSD80, CSD81, CSD82, CSD83, CSD84, CSD85, CSD86, CSD87, CSD88, CSD89, CSD90, CSD91, CSD92, CSD93, CSD94, CSD95, CSD96, CSD97, CSD98, CSD99, CSD100 |   |
| TGFBR1   | Transforming growth factor, beta receptor 1                                                                              | AA15, LRS1, LDS1B, LDS2, LDS2B, MFS2, KHC, TAAD2, TCFE2, TCFE2B, RH                                                                                                                                                                                                                                                                                                                                                                                                                                                                                                                                                                                                                                                                              |   |
| TGFBR2   | Transforming growth factor, beta receptor II (70/80 LDs)                                                                 |                                                                                                                                                                                                                                                                                                                                                                                                                                                                                                                                                                                                                                                                                                                                                  |   |
| TGFBR3   | Transforming growth factor, beta receptor III                                                                            | BGCAN, betaglycan                                                                                                                                                                                                                                                                                                                                                                                                                                                                                                                                                                                                                                                                                                                                |   |
| TGFBRAP1 | Transforming growth factor, beta receptor associated protein 1                                                           | RP11-332H14.1, TRAP-1, TRAP1                                                                                                                                                                                                                                                                                                                                                                                                                                                                                                                                                                                                                                                                                                                     |   |
| TGIF2    | TGFB-induced factor homeobox 2                                                                                           |                                                                                                                                                                                                                                                                                                                                                                                                                                                                                                                                                                                                                                                                                                                                                  |   |
| TGM2     | Transglutaminase 2                                                                                                       | KTJ-1054AZZ.2, U-ALPHA-II, UNAH, HEL-S-45, TG2, TGG                                                                                                                                                                                                                                                                                                                                                                                                                                                                                                                                                                                                                                                                                              |   |
| TH1L     |                                                                                                                          |                                                                                                                                                                                                                                                                                                                                                                                                                                                                                                                                                                                                                                                                                                                                                  |   |
| THADA    | Thyroid adenoma associated                                                                                               | GITA                                                                                                                                                                                                                                                                                                                                                                                                                                                                                                                                                                                                                                                                                                                                             |   |
| THAP1    | THAP domain containing, apoptosis                                                                                        | DYT6                                                                                                                                                                                                                                                                                                                                                                                                                                                                                                                                                                                                                                                                                                                                             |   |
| THAP2    | THAP domain containing, apoptosis                                                                                        |                                                                                                                                                                                                                                                                                                                                                                                                                                                                                                                                                                                                                                                                                                                                                  |   |
| THAP3    | THAP domain containing, apoptosis                                                                                        |                                                                                                                                                                                                                                                                                                                                                                                                                                                                                                                                                                                                                                                                                                                                                  |   |
| THAP4    | THAP domain containing 4                                                                                                 |                                                                                                                                                                                                                                                                                                                                                                                                                                                                                                                                                                                                                                                                                                                                                  |   |
| THAP6    | THAP domain containing 6                                                                                                 |                                                                                                                                                                                                                                                                                                                                                                                                                                                                                                                                                                                                                                                                                                                                                  |   |
| THBD     | Thrombomodulin                                                                                                           | AHUS6, BDCA3, CD141, THPH12, THRM, TM                                                                                                                                                                                                                                                                                                                                                                                                                                                                                                                                                                                                                                                                                                            |   |
| THBS1    | Thrombospondin 1                                                                                                         | THBS, THBS-1, TSP, TSP-1, TSP1                                                                                                                                                                                                                                                                                                                                                                                                                                                                                                                                                                                                                                                                                                                   |   |

|          |                                                                         |                                                                                                                        |  |
|----------|-------------------------------------------------------------------------|------------------------------------------------------------------------------------------------------------------------|--|
| THBS2    | Thrombospondin 2                                                        | XXyac-YX65C7_A.1, TSP2                                                                                                 |  |
| THBS4    | Thrombospondin 4                                                        | TSP4                                                                                                                   |  |
| THEMIS   | Thymocyte selection associated                                          | C00H190, C00H207, CASP, SPOT, TSEFA,<br>EA325024.2, EA325024.4                                                         |  |
| THOC7    | THO complex 7 homolog (Drosophila)                                      | NIF3L1BP1, fSAP24, hTREX30                                                                                             |  |
| THRA     | Thyroid hormone receptor, alpha                                         | AK7, CHNG0, LAK7, LKD-1-1, LRDA, LRDA1,<br>NR1A11, TUBA2, FDBA, 1, TUBA,<br>C-ERDA-2, C-ERDA-BETA, ERDA2, ORTH, NKTAZ, |  |
| THRB     | Thyroid hormone receptor, beta                                          | DBTL, TUB11, TUBD2, TUBD                                                                                               |  |
| THRSP    | Thyroid hormone responsive                                              | LPGP1, Lpgp, S14, SPOT14, THRP                                                                                         |  |
| THSD1    | Thrombospondin, type 1, domain containing 1                             | RP11-245D16.1, TMTSP, UNQ3010                                                                                          |  |
| THSD4    | Thrombospondin, type 1, domain containing 4                             | UNQ9554, ADAMTSL0, ADAMTSL0, FVST9554,<br>DDQ24005                                                                     |  |
| THSD7B   | Thrombospondin, type 1, domain containing 7B                            |                                                                                                                        |  |
| THUMPD1  | THUMP domain containing 1                                               |                                                                                                                        |  |
| THUMPD2  | THUMP domain containing 2                                               | C2orf8                                                                                                                 |  |
| THUMPD3  | THUMP domain containing 3                                               |                                                                                                                        |  |
| TIA1     | TIA1 cytotoxic granule-associated RNA binding protein like 1            | TIA-1, WDM                                                                                                             |  |
| TIAL1    | TIA1 cytotoxic granule-associated RNA binding protein like 1            | TCBP, TIAR                                                                                                             |  |
| TIAM1    | T-cell lymphoma invasion and metastasis 1                               |                                                                                                                        |  |
| TICAM2   | Toll-like receptor adaptor molecule 2                                   | MyD88-4, TICAM-2, TIRAP3, TIRP, TRAM                                                                                   |  |
| TIFA     | TIRAP-interacting protein with tollreceptor-associated domain           | T2BP, T6BPA, TIFA                                                                                                      |  |
| TIGD6    | Tigger transposable element derived 6                                   |                                                                                                                        |  |
| TIGD7    | Tigger transposable element derived 7                                   | Sancho                                                                                                                 |  |
| TIGIT    | T cell immunoreceptor with Ig and ITIM domains                          | VSIG9, VSTM3, WUCAM                                                                                                    |  |
| TIMELESS | Timeless circadian clock                                                | TIM, TIM1, hTIM                                                                                                        |  |
| TIMM10   | translocase of inner mitochondrial membrane 10 homolog (yeast)          | TIM10, TIM10A                                                                                                          |  |
| TIMM13   | translocase of inner mitochondrial membrane 13 homolog (yeast)          | TIM13, TIM13BA, TIMM13B, ppv1, TIMM13                                                                                  |  |
| TIMM17A  | translocase of inner mitochondrial membrane 17 homolog (yeast)          | TIM17, TIM17A                                                                                                          |  |
| TIMM23   | translocase of inner mitochondrial membrane 23 homolog (yeast)          | RP11-481A12.7, TIM23                                                                                                   |  |
| TIMM50   | translocase of inner mitochondrial membrane 50 homolog (Caenorhabditis) | PRO1512, TIM50, TIM50L                                                                                                 |  |
| TIMP3    | TIMP metalloproteinase inhibitor 3                                      | RP1-309I22.1, HSMRK222, K222, K222TA2, SFD                                                                             |  |
| TIMP4    | TIMP metalloproteinase inhibitor 4                                      |                                                                                                                        |  |
| TINAG    | Tubulointerstitial nephritis antigen                                    | RP11-124I4.1, TIN-AG                                                                                                   |  |
| TIPARP   | TICDD-inducible poly(ADP-ribose) polymerase                             | ARTD14, PARP7, pART14                                                                                                  |  |
| TJP2     | Tight junction protein 2                                                | RP11-101N0.1, C9D0Fq21.11, DFNAST, D0F9q21.11,<br>DFIC4_X101_702                                                       |  |
| TK2      | Thymidine kinase 2, mitochondrial                                       | MTDPS2, MTTK                                                                                                           |  |

|              |                                                                  |                                                   |  |
|--------------|------------------------------------------------------------------|---------------------------------------------------|--|
| TLE1         | Transducin-like enhancer of split 1 (E(sp1) homolog, Drosophila) | RP11-203D19.1, ESG, ESG1, GRG1                    |  |
| TLE3         | Transducin-like enhancer of split 3                              | ESG, ESG3, GRG3, HsT18976                         |  |
| TLE4         | Transducin-like enhancer of split 4                              | RP11-79D8.3, BCE-1, BCE1, E(sp1), ESG, ESG4, GRG4 |  |
| TLK1         | Tousled-like kinase 1                                            | PKU-beta                                          |  |
| TLK2         | Tousled-like kinase 2                                            | HsHPK, PKU-ALPHA                                  |  |
| TLL1         | Tolloid-like 1                                                   | ASD6, TLL                                         |  |
| TLL2         | Tolloid-like 2                                                   |                                                   |  |
| TLN1         | Talin 1                                                          | RP11-112J3.1, ILWEQ, TLN                          |  |
| TLR10        | Toll-like receptor 10                                            | UNQ315/PRO358, CD290                              |  |
| TLR4         | Toll-like receptor 4                                             | ARMD10, CD284, TLR-4, TOLL                        |  |
| TLR6         | Toll-like receptor 6                                             | CD286                                             |  |
| TLR8         | Toll-like receptor 8                                             | UNQ249/PRO286, CD288                              |  |
| TM2D3        | TM2 domain containing 3                                          | BLP2                                              |  |
| TM4SF1       | Transmembrane 4 L six family member 1                            | H-L6, L6, M3S1, TAAL6                             |  |
| TM7SF3       | Transmembrane 7 superfamily member 3                             |                                                   |  |
| TM9SF3       | Transmembrane 9 superfamily member 3                             | RP11-34E5.1, EP70-P-iso, SMBP                     |  |
| TM9SF4       | Transmembrane 9 superfamily member 4                             | RP5-836N17.2, dJ836N17.2                          |  |
| TMC1         | Transmembrane channel-like 1                                     | RP11-296H15.1, DFNA36, DFNB11, DFNB7              |  |
| TMC8         | Transmembrane channel-like 8                                     | EV2, EVER2, EVIN2                                 |  |
| TMCC1        | Transmembrane and coiled-coil domain family 1                    |                                                   |  |
| TMCC3        | Transmembrane and coiled-coil domain family 3                    |                                                   |  |
| TMCO3        | Transmembrane and coiled-coil domains 3                          | RP11-230F18.3, C13orf11                           |  |
| TMED10       | Transmembrane emp24-like trafficking domain containing 10        | TZ4(DELTA), S5TH25, S5TH25, TM21, Tmp-21-1, p22   |  |
| TMED10P1     | Transmembrane emp24-like trafficking domain containing 10        |                                                   |  |
| TMED5        | Transmembrane emp24 protein transport domain containing 5        | RP5-976O13.2, CGI-100, p28                        |  |
| TMED6        | Transmembrane emp24 protein transport domain containing 6        | UNQ9146/PRO34237, PRO34237, SPL19146              |  |
| TMED7        | Transmembrane emp24 protein transport domain containing 7        | CGI-109, p24gamma3, p27                           |  |
| TMED7-TICAM2 | TMED7-TICAM2 readthrough                                         |                                                   |  |
| TMED9        | Transmembrane emp24 protein transport domain containing 9        | GMP25, HSGP25L2G, p25                             |  |
| TMEFF1       | Transmembrane protein with EGF-like and transmembrane domain     | C9orf2, CT120.1, H7365, TR-1                      |  |
| TMEFF2       | Transmembrane protein with EGF-like and transmembrane domain     | UNQ178/PRO204, CT120.2, HPP1, TENB2, TPEF, TR     |  |
| TMEM105      | Transmembrane protein 105                                        |                                                   |  |
| TMEM106A     | Transmembrane protein 106A                                       |                                                   |  |

|          |                            |                                                      |  |
|----------|----------------------------|------------------------------------------------------|--|
| TMEM106B | Transmembrane protein 106B |                                                      |  |
| TMEM107  | Transmembrane protein 107  | DC20, GRVS638, PRO1268                               |  |
| TMEM108  | Transmembrane protein 108  | UNQ1875/PRO4318, CT124                               |  |
| TMEM115  | Transmembrane protein 115  | LUCA11.2, PL6                                        |  |
| TMEM116  | Transmembrane protein 116  |                                                      |  |
| TMEM120B | Transmembrane protein 120B |                                                      |  |
| TMEM123  | Transmembrane protein 123  | PSEC0111, KCT3, PORIMIN, PORMIN                      |  |
| TMEM126B | Transmembrane protein 126B | HT007                                                |  |
| TMEM127  | Transmembrane protein 127  |                                                      |  |
| TMEM131  | Transmembrane protein 131  | CC28, PRO1048, RW1, YR-23                            |  |
| TMEM132A | Transmembrane protein 132A | GBP, HSPA5BP1                                        |  |
| TMEM132B | Transmembrane protein 132B |                                                      |  |
| TMEM132C | Transmembrane protein 132C | PPP1R152                                             |  |
| TMEM132D | Transmembrane protein 132D | MOLT, PPP1R153                                       |  |
| TMEM133  | Transmembrane protein 133  | AD031                                                |  |
| TMEM135  | Transmembrane protein 135  | PMP52                                                |  |
| TMEM136  | Transmembrane protein 136  |                                                      |  |
| TMEM138  | Transmembrane protein 138  | HSPC196                                              |  |
| TMEM144  | Transmembrane protein 144  |                                                      |  |
| TMEM14A  | Transmembrane protein 14A  | PTD011, C6orf73                                      |  |
| TMEM151B | Transmembrane protein 151B | RP11-444E17.5, C6orf137, TMEM193, bA444E17.5         |  |
| TMEM154  | Transmembrane protein 154  |                                                      |  |
| TMEM155  | Transmembrane protein 155  |                                                      |  |
| TMEM161B | Transmembrane protein 161B | UNQ679/PRO1313, FLB3342, PRO1313                     |  |
| TMEM164  | Transmembrane protein 164  | RP13-360B22.2, bB360B22.3                            |  |
| TMEM165  | Transmembrane protein 165  | CDG2K, FT27, GDT1, TMPT27, TPARL                     |  |
| TMEM167A | Transmembrane protein 167A | TMEM167                                              |  |
| TMEM167B | Transmembrane protein 167B | AD-020, C1orf119                                     |  |
| TMEM168  | Transmembrane protein 168  |                                                      |  |
| TMEM17   | Transmembrane protein 17   |                                                      |  |
| TMEM170A | Transmembrane protein 170A | TMEM170                                              |  |
| TMEM170B | Transmembrane protein 170B | RP11-679B17.1                                        |  |
| TMEM173  | Transmembrane protein 173  | LRIS, MITA, MIF13, NET23, SAV1, STING, HMMA, L-STING |  |

|          |                            |                             |  |
|----------|----------------------------|-----------------------------|--|
| TMEM178  | Transmembrane protein 178  | tmem178a, zgc:153181        |  |
| TMEM18   | Transmembrane protein 18   |                             |  |
| TMEM181  | Transmembrane protein 181  | GPR178, KIAA1423            |  |
| TMEM183A | Transmembrane protein 183A | C1orf37                     |  |
| TMEM183B | Transmembrane protein 183B | C1orf37-DUP                 |  |
| TMEM184C | Transmembrane protein 184C | PRO1355, TMEM34             |  |
| TMEM185A | Transmembrane protein 185A | CXorf13, FAM11A, FRAXF, ee3 |  |
| TMEM189  | Transmembrane protein 189  | RP5-1185N5.1, KUA           |  |
| TMEM19   | Transmembrane protein 19   |                             |  |
| TMEM192  | Transmembrane protein 192  |                             |  |
| TMEM194A | Transmembrane protein 194A | TMEM194                     |  |
| TMEM196  | Transmembrane protein 196  |                             |  |
| TMEM199  | Transmembrane protein 199  | C17orf32                    |  |
| TMEM20   |                            |                             |  |
| TMEM200A | Transmembrane protein 200A | HBE61, KIAA1913, TTMA, TTMC |  |
| TMEM201  | Transmembrane protein 201  | RP13-15M17.2, NET5          |  |
| TMEM202  | Transmembrane protein 202  |                             |  |
| TMEM203  | Transmembrane protein 203  | HBEBP1                      |  |
| TMEM206  | Transmembrane protein 206  | RP11-384C4.5, C1orf75       |  |
| TMEM207  | Transmembrane protein 207  | UNQ846/PRO1784, UNQ846      |  |
| TMEM208  | Transmembrane protein 208  | HSPC171                     |  |
| TMEM213  | Transmembrane protein 213  |                             |  |
| TMEM214  | Transmembrane protein 214  | PP446                       |  |
| TMEM217  | Transmembrane protein 217  | C6orf128, dJ355M6.2         |  |
| TMEM219  | Transmembrane protein 219  | IGFBP-3R                    |  |
| TMEM22   |                            |                             |  |
| TMEM229A | Transmembrane protein 229A | tcag7.977                   |  |
| TMEM229B | Transmembrane protein 229B | C14orf83                    |  |
| TMEM233  | Transmembrane protein 233  | DSPB2, IFITMD2              |  |
| TMEM26   | Transmembrane protein 26   |                             |  |
| TMEM27   | Transmembrane protein 27   | UNQ679/PRO1312, NX-17, NX17 |  |
| TMEM30A  | Transmembrane protein 30A  | C6orf67, CDC50A             |  |
| TMEM33   | Transmembrane protein 33   | 1600019D15Rik, SHINC3       |  |



|             |                                                   |                                            |  |
|-------------|---------------------------------------------------|--------------------------------------------|--|
| TMEM35      | Transmembrane protein 35                          | RP4-664K17.3                               |  |
| TMEM38A     | Transmembrane protein 38A                         | TRIC-A, TRICA                              |  |
| TMEM40      | Transmembrane protein 40                          |                                            |  |
| TMEM41A     | Transmembrane protein 41A                         | UNQ168/PRO194, 2900010K02Rik               |  |
| TMEM43      | Transmembrane protein 43                          | UNQ2564/PRO6244, ARVC5, ARVD5, EDMD7, LUMA |  |
| TMEM45A     | Transmembrane protein 45A                         | DERP7                                      |  |
| TMEM45B     | Transmembrane protein 45B                         |                                            |  |
| TMEM47      | Transmembrane protein 47                          | BCMP1, TM4SF10                             |  |
| TMEM49      |                                                   |                                            |  |
| TMEM50A     | Transmembrane protein 50A                         | RP11-335G20.3, IFNRC, SMP1                 |  |
| TMEM56      | Transmembrane protein 56                          |                                            |  |
| TMEM57      | Transmembrane protein 57                          | RP3-469D22.2, MACOILIN                     |  |
| TMEM63C     | Transmembrane protein 63C                         | C14orf171, CSC1, hsCSC1                    |  |
| TMEM64      | Transmembrane protein 64                          |                                            |  |
| TMEM65      | Transmembrane protein 65                          |                                            |  |
| TMEM71      | Transmembrane protein 71                          |                                            |  |
| TMEM84      |                                                   |                                            |  |
| TMEM86A     | Transmembrane protein 86A                         |                                            |  |
| TMEM87A     | Transmembrane protein 87A                         | PSEC0094                                   |  |
| TMEM87B     | Transmembrane protein 87B                         |                                            |  |
| TMEM8B      | Transmembrane protein 8B                          | RP11-112J3.10, C9orf127, NAG-5, NGX6       |  |
| TMEM9       | Transmembrane protein 9                           | RP5-894H24.1A, TMEM9                       |  |
| TMEM92      | Transmembrane protein 92                          | UNQ5801/PRO19608                           |  |
| TMEM97      | Transmembrane protein 97                          | MAC30                                      |  |
| TMEM98      | Transmembrane protein 98                          | UNQ536/PRO1079, TADA1                      |  |
| TMEM9B      | TMEM9 domain family, member B                     | UNQ712/PRO1375, C11orf15                   |  |
| TMF1        | TATA element modulatory factor 1                  | ARA160, TMF                                |  |
| TMLHE       | Trimethyllysine hydroxylase, epsilon              | AUTSX6, BBOX2, TMLD, TMLHD, XAP130, TMLHE  |  |
| TMOD3       | Tropomodulin 3 (ubiquitous)                       | UTMOD                                      |  |
| TMPPE       | Transmembrane protein with metalloprotease domain |                                            |  |
| TMPRSS11A   | Transmembrane protease, serine 11A                | ECRG1                                      |  |
| TMPRSS11BNL | TMPRSS11B N-terminal like, pseudogene             |                                            |  |
| TMPRSS11D   | Transmembrane protease, serine 11D                | HAT                                        |  |



|          |                                                                            |                                                                                                |   |
|----------|----------------------------------------------------------------------------|------------------------------------------------------------------------------------------------|---|
| TNPO1    | Transportin 1                                                              | IPO2, KPNB2, MIP, MIP1, TRN                                                                    |   |
| TNPO3    | Transportin 3                                                              | IPOT2, LGMD11, MTK10A, TRN-3K, TRN-3K2, TRN3D                                                  |   |
| TNRC6B   | Trinucleotide repeat containing 6B                                         | RP5-1042K10.7                                                                                  |   |
| TNRC6C   | trinucleotide repeat containing 6C                                         |                                                                                                |   |
| TNS1     | Tensin 1                                                                   | MST1091, MST091, MST122, MST127, MST12Z, MSTR127, MYD46, PPP1R155, TNS                         |   |
| TNS3     | Tensin 3                                                                   | TEM6, TENS1                                                                                    |   |
| TNS4     | Tensin 4                                                                   | PP14434, CTEN                                                                                  |   |
| TOB2     | Transducer of ERBB2, 2                                                     | CTA-223H9.7, TOB4, TOBL, TROB2                                                                 |   |
| TOE1     | Target of EGR1, member 1 (nuclear)                                         |                                                                                                |   |
| TOM1L1   | Target of myb1 (chicken)-like 1                                            | OK/KNS-CL.3, SRCASM                                                                            |   |
| TOM1L2   | Target of myb1-like 2 (chicken)                                            | UNQ3124                                                                                        |   |
| TOMM20   | translocase of outer mitochondrial membrane 20                             | RP4-597N16.2, MAS20, MOM19, TOM20                                                              |   |
| TOMM34   | translocase of outer mitochondrial membrane 34                             | HTOM34P, TOM34, URCC3                                                                          |   |
| TOMM40L  | translocase of outer mitochondrial membrane 40L                            | RP11-297K8.10, TOMM40B                                                                         |   |
| TOMM5    | translocase of outer mitochondrial membrane 5                              | C9orf105, Tom5, bA613M10.3                                                                     |   |
| TOMM7    | translocase of outer mitochondrial membrane 7 homolog (yeast)              | AD-014, TOM7                                                                                   |   |
| TOP1     | Topoisomerase (DNA) I                                                      | RP3-511B24.1, TOPI                                                                             | v |
| TOP3B    | Topoisomerase (DNA) III beta                                               | TOP3B1                                                                                         |   |
| TOPBP1   | Topoisomerase (DNA) II binding protein 1                                   | TOP2BP1                                                                                        |   |
| TOPORS   | Topoisomerase I binding, arginine/serine-rich, F2 ubiquitin-protein ligase | RP11-205M20.5, LUN, P53BP3, RP31, TP53BPL                                                      |   |
| TOR1A    | Torsin family 1, member A (torsin A)                                       | DQ2, DYT1                                                                                      |   |
| TOR1AIP2 | Torsin A interacting protein 2                                             | RP11-12M5.5, IFRG15, LULL1, NET9                                                               |   |
| TOR3A    | Torsin family 3, member A                                                  | RP11-177A2.2, ADIR, ADIR2                                                                      |   |
| TOX      | T lymphocyte selection-associated high mobility group box                  | TOX1                                                                                           |   |
| TP53BP1  | Tumor protein p53 binding protein 1                                        | 53BP1, p202                                                                                    |   |
| TP53BP2  | Tumor protein p53 binding protein 2                                        | 53BP2, ASPP2, BBP, P53BP2, PPP1R13A                                                            |   |
| TP53INP1 | Tumor protein p53 inducible nuclear protein 1                              | SNR, TP53DINT1A, TP53DINT1B, Teap, p53DINT1, TP53INP1                                          |   |
| TP53RK   | TP53 regulating kinase                                                     | TP53RK20.1, BUD32, C200H04, NON-2, NON-2p, RRPK, U191A2                                        |   |
| TP63     | Tumor protein p63                                                          | AR3, B(p51A), B(p51B), EEC3, KET1, LMS, INDI, OFC6, PUS, SUEM4, TP53CB, TP53L, TP73L, p40, p51 |   |
| TP73     | Tumor protein p73                                                          | P73                                                                                            |   |
| TPCN2    | Two pore segment channel 2                                                 | SHEP10, TPC2                                                                                   |   |
| TPD52    | Tumor protein D52                                                          | D52, N8L, PC-1, PrLZ, hD52                                                                     |   |
| TPD52L1  | Tumor protein D52-like 1                                                   | D53, hD53                                                                                      |   |

|           |                                                                             |                                                                                               |   |
|-----------|-----------------------------------------------------------------------------|-----------------------------------------------------------------------------------------------|---|
| TPD52L2   | Tumor protein D52-like 2                                                    | RP4-591C20.2, D54                                                                             |   |
| TPD52L3   | Tumor protein D52-like 3                                                    | NYDSP25, hD55                                                                                 |   |
| TPM1      | Tropomyosin 1 (alpha)                                                       | C15orf13, CMD1Y, CMH3, HTM-alpha, LVNC9, TMSA                                                 |   |
| TPM3      | Tropomyosin 3                                                               | RP11-203M9.1, CAPM1, CPTD, HELL-189, HELL-5-82P, NEM1, QK/SW-15, TM5, TM2, TM20, TM20-2       | v |
| TPMT      | Thiopurine S-methyltransferase                                              |                                                                                               |   |
| TPP1      | Tripeptidyl peptidase I                                                     | GIG1, CLN2, LPIC, SCAR7, TPP-1                                                                |   |
| TPP2      | Tripeptidyl peptidase II                                                    | RP11-29B2.2, TPP-2                                                                            |   |
| TPPP      | Tubulin polymerization promoting protein                                    | TPPP/p251, p24, p25, p25alpha, TPPP                                                           |   |
| TPRG1     | Tumor protein p63 regulated 1                                               | FAM79B                                                                                        |   |
| TPRX1     | Tetra-peptide repeat homeobox 1                                             | TPRX                                                                                          |   |
| TPRXL     | Tetra-peptide repeat homeobox-like                                          |                                                                                               |   |
| TPST2     | Tyrosylprotein sulfotransferase 2                                           | CTA-445C9.10-003, TANGO13B                                                                    |   |
| TPTE2P1   | Transmembrane phosphoinositide 3-kinase domain and tyrosine kinase domain 2 | RP11-756A22.3                                                                                 |   |
| TPX2      | TPX2, microtubule-associated                                                | RP11-243J10.10-002, C200H1, C200H2, DIL2, DIL2, FLS252, GD-C20-61, HGA510, HCTR4, RFBP86, 100 |   |
| TRA@      |                                                                             |                                                                                               | v |
| TRAC      | T cell receptor alpha constant                                              | IMD7, TCRA, TRA, TRCA                                                                         |   |
| TRADD     | TNFRSF1A-associated via death domain                                        | Hs.89862                                                                                      |   |
| TRAF1     | TNF receptor-associated factor 1                                            | EBI6, MGC:10353                                                                               |   |
| TRAF3IP2  | TRAF3 interacting protein 2                                                 | RP3-487J7.5, ACT1, C00H2, C00H4, C00H5, C00H6, CANDE8, CHS, DSOBS12                           |   |
| TRAF5     | TNF receptor-associated factor 5                                            | RP11-318L16.2, MGC:39780, RNF84                                                               |   |
| TRAJ17    | T cell receptor alpha joining 17                                            |                                                                                               |   |
| TRAK1     | Trafficking protein, kinesin binding 1                                      | MILT1, OIP106                                                                                 |   |
| TRAK2     | Trafficking protein, kinesin binding 2                                      | ALS2CR3, CALS-C, GRIF-1, GRIF1, MILT2, OIP98                                                  |   |
| TRAM1     | Translocation associated membrane protein 1                                 | PNAS8, TRAM, TRAMP                                                                            |   |
| TRAM1L1   | Translocation associated membrane protein 1-like 1                          |                                                                                               |   |
| TRANK1    | Tetrapeptide repeat and ankyrin repeat containing 1                         | LBA1                                                                                          |   |
| TRAPPC10  | Trafficking protein particle complex 10                                     | EHOC-1, EHOC1, GT334, TMEM1, TRS130, TRS30                                                    |   |
| TRAPPC2   | Trafficking protein particle complex 2                                      | MIP2A, SEDL, SEDLP1, TRS20, ZNF547L, HTP38534, TRAPPC2                                        |   |
| TRAPPC2P1 | Trafficking protein particle complex 2 pseudogene 1                         | MIP-2A, SEDLP, SEDLP1                                                                         |   |
| TRAPPC6B  | Trafficking protein particle complex 6B                                     | TPC6                                                                                          |   |
| TRAT1     | T cell receptor associated transmembrane protein 1                          | HSPC062, TCRIM, TRIM                                                                          |   |
| TRAV20    | T cell receptor alpha variable 20                                           | TCRAV20S1, TCRAV30S1                                                                          |   |
| TRDMT1    | TRNA aspartic acid methyltransferase 1                                      | RP11-400H21.1, DNMT12, DNMT2, DNMT3, DNMT3A, DNMT3B, DNMT3L, DNMT3L1                          |   |

|              |                                                             |                                                                 |   |
|--------------|-------------------------------------------------------------|-----------------------------------------------------------------|---|
| TRDN         | Triadin                                                     | RP11-167I10.1, CPVT5, TDN, TRISK                                |   |
| TRDV2        | T cell receptor delta variable 2                            | hDV102S1                                                        |   |
| TREM1        | Triggering receptor expressed on myeloid cells 1            | CD354, TREM-1                                                   |   |
| TREML4       | Triggering receptor expressed on myeloid cells like 4       | UNQ9425/PRO34675, TLT-4, TLT4                                   |   |
| TRERF1       | Transcriptional regulating factor 1                         | RP11-159D8.3, BCAR2, HSAZ17270, KAPA, TRERF1Z, TRERF1Z, TRERF1Z |   |
| TRHDE        | Thyrotropin-releasing hormone degrading enzyme              | UNQ2507/PRO5995, PAP-II, PGPEP2, TRH-DE                         |   |
| TRIAP1       | TP53 regulated inhibitor of apoptosis 1                     | HSPC132, MDM35, P53CSV, WF-1                                    |   |
| TRIL         | TLR4 interactor with leucine-rich repeats                   |                                                                 |   |
| TRIM13       | Tripartite motif containing 13                              | CAR, DLEU5, LEU5, RFP2, RNF77                                   |   |
| TRIM14       | Tripartite motif containing 14                              |                                                                 |   |
| TRIM2        | Tripartite motif containing 2                               | CMT2R, RNF86                                                    |   |
| TRIM22       | Tripartite motif containing 22                              | GPSTAF50, RNF94, STAF50                                         |   |
| TRIM23       | Tripartite motif containing 23                              | ARD1, ARFD1, RNF46                                              |   |
| TRIM25       | Tripartite motif containing 25                              | EFP, RNF147, Z147, ZNF147                                       |   |
| TRIM27       | Tripartite motif containing 27                              | DAAP-182E11.3, RFP, RNF76                                       | √ |
| TRIM3        | Tripartite motif containing 3                               | BERP, HAC1, RNF22, RNF97                                        |   |
| TRIM33       | Tripartite motif containing 33                              | ECTO, FIC1, RNF7, TRIG, TRIG, TRIGAMMA, TRIGAMMA                | √ |
| TRIM34       | Tripartite motif containing 34                              | IFP1, RNF21                                                     |   |
| TRIM35       | Tripartite motif containing 35                              | HLS5, MAIR                                                      |   |
| TRIM36       | Tripartite motif containing 36                              | HAPRIN, RBCC728, RNF98                                          |   |
| TRIM39       | Tripartite motif containing 39                              | DAAP-385L22.4, RNF23, TFPB, TRIM39                              |   |
| TRIM4        | Tripartite motif containing 4                               | RNF87                                                           |   |
| TRIM41       | Tripartite motif containing 41                              | RINCK                                                           |   |
| TRIM42       | Tripartite motif containing 42                              | PPP1R40                                                         |   |
| TRIM44       | Tripartite motif containing 44                              | DIPB, HSA249128, MC7                                            |   |
| TRIM47       | Tripartite motif containing 47                              | GOA, RNF100                                                     |   |
| TRIM55       | Tripartite motif containing 55                              | MURF-2, RNF29, muRF2                                            |   |
| TRIM61       | Tripartite motif containing 61                              | RNF35                                                           |   |
| TRIM64       | Tripartite motif containing 64                              | C11orf28A, TRIM64                                               |   |
| TRIM69       | Tripartite motif containing 69                              | hCG_39321, HSD-34, HSD34, RNF36, Trif                           |   |
| TRIM6-TRIM34 | TRIM6-TRIM34 readthrough                                    | IFP1, RNF21, TRIM34                                             |   |
| TRIM71       | Tripartite motif containing 71, E3 ubiquitin protein ligase | LIN-41, LIN41                                                   |   |
| TRIM78P      | Tripartite motif containing 78, pseudogene                  |                                                                 |   |

|          |                                                                    |                                                    |   |
|----------|--------------------------------------------------------------------|----------------------------------------------------|---|
| TRIM9    | Tripartite motif containing 9                                      | RNF91, SPRING                                      |   |
| TRIML2   | Tripartite motif family-like 2                                     | SPRYD6                                             |   |
| TRIO     | Trio Rho guanine nucleotide exchange factor                        | ARHGEF23, tgat                                     |   |
| TRIP13   | Thyroid hormone receptor interactor 13                             | 16E1BP                                             |   |
| TRMT2A   | TRNA methyltransferase 2 homolog A (S. pombe)                      | HTF9C                                              |   |
| TRMT5    | TRNA methyltransferase 5                                           | KIAA1393, TRM5                                     |   |
| TRMT6    | TRNA methyltransferase 6 homolog (S. pombe)                        | CGI-09, GCD10, Gcd10p                              |   |
| TRNAU1AP | TRNA selenocysteine 1 associated protein 1                         | RP4-669K10.4, PRO1902, SECP43, TRSPAP1             |   |
| TRNP1    | TMF1-regulated nuclear protein 1                                   | C1orf225, TNRP                                     |   |
| TROVE2   | TROVE domain family, member 2                                      | RP11-101E13.3, RO60, RORNPN, SSA2                  |   |
| TRPA1    | transient receptor potential cation channel, subfamily A, member 1 |                                                    |   |
| TRPC1    | transient receptor potential cation channel, subfamily C, member 1 | HTRP-1, TRP1                                       |   |
| TRPC5    | transient receptor potential cation channel, subfamily C, member 5 | RP1-68D15.2, PPP1R159, TRP5                        |   |
| TRPC6    | transient receptor potential cation channel, subfamily C, member 6 | FSGS2, TRP6                                        |   |
| TRPM3    | transient receptor potential cation channel, subfamily M, member 3 | RP11-141J10.3, GON-2, LTRPC3, MLSN2                |   |
| TRPM6    | transient receptor potential cation channel, subfamily M, member 6 | RP11-174B4.1, CHAK2, HMGX, HOMG, HOMG1, HSH        |   |
| TRPM7    | transient receptor potential cation channel, subfamily M, member 7 | ALSPDC, CHAK, CHAK1, LTRPC7, LTRPC7, TRP-PL17      |   |
| TRPM8    | transient receptor potential cation channel, subfamily M, member 8 | LTRPC6, TRPP8                                      |   |
| TRPS1    | Trichorhinophalangeal syndrome I                                   | GC79, LGCR                                         |   |
| TRPV1    | transient receptor potential cation channel, subfamily V, member 1 | VR1                                                |   |
| TRPV6    | transient receptor potential cation channel, subfamily V, member 6 | ADP/Z1, CAT1, CATE, ECAC2, HSAZ17909, LF0728, ZFAD |   |
| TRRAP    | transformation/transcription domain-associated protein             | PAF350/400, PAF400, STAF40, TR-AP, Tra1            | √ |
| TRUB1    | troubadour domain (psi) synthase family member 1                   | PUS4                                               |   |
| TSC1     | Tuberous sclerosis 1                                               | LAM, TSC                                           | √ |
| TSC22D2  | TSC22 domain family, member 2                                      | TILZ4a, TILZ4b, TILZ4c                             |   |
| TSEN2    | TSEN2 tRNA splicing endonuclease subunit                           | PCH2B, SEN2, SEN2L                                 |   |
| TSEN34   | TSEN34 tRNA splicing endonuclease subunit                          | XXbac-BCX105G6.5, LENG5, PCH2C, SEN34, SEN34L      |   |
| TSFM     | TS transcription elongation factor, mitochondrial                  | EFTS, EFTSMT                                       |   |
| TSG1     | Tumor suppressor TSG1                                              |                                                    |   |
| TSG101   | Tumor susceptibility 101                                           | TSG10, VPS23                                       |   |
| TSGA10   | Testis specific, 10                                                | CEP4L, CT79                                        |   |
| TSGA14   | Testis specific, 14                                                |                                                    |   |
| TSHR     | Thyroid stimulating hormone receptor                               | CHNG1, LGR3, hTSHR-I                               | √ |

|             |                                                                    |                                                                       |  |
|-------------|--------------------------------------------------------------------|-----------------------------------------------------------------------|--|
| TSIX        | TSIX transcript, XIST antisense RNA                                | LINC00015, lncRNA00015, XIST-AS, XIST-AS1, XIST-AS                    |  |
| TSL         | Testis-expressed, seven-twelve, leukemia                           |                                                                       |  |
| TSLP        | Thymic stromal lymphopoietin                                       |                                                                       |  |
| TSNAX       | Translin-associated factor X                                       | RP11-17H4.1, TRAX                                                     |  |
| TSNAX-DISC1 | TSNAX-DISC1 readthrough (NMID candidate)                           |                                                                       |  |
| TSPAN11     | Tetraspanin 11                                                     | UNQ1971, VSSW1971                                                     |  |
| TSPAN12     | Tetraspanin 12                                                     | UNQ774/PRO1568, EVR5, NET-2, NET2, TM4SF12                            |  |
| TSPAN14     | Tetraspanin 14                                                     | RGD1305714                                                            |  |
| TSPAN16     | Tetraspanin 16                                                     | TM-8, TM4-B, TM4SF16                                                  |  |
| TSPAN18     | Tetraspanin 18                                                     | UNQ3042/PRO9858, TSPAN                                                |  |
| TSPAN32     | Tetraspanin 32                                                     | ART1, PHEMX, PHMX, TSSC6                                              |  |
| TSPAN7      | Tetraspanin 7                                                      | AT5, CCG-B7, CD251, DAST092E, MKX58, MMS1, TALLA-1, TM4SF2, TM4SF2L   |  |
| TSPAN8      | Tetraspanin 8                                                      | CO-029, TM4SF3                                                        |  |
| TSPAN9      | Tetraspanin 9                                                      | NET-5, NET5, PP1057                                                   |  |
| TSPYL2      | TSPY-like 2                                                        | RP1-290P12.2, CDAT, CINAI, CTCL, DENT1, IJHHER2216, NP70, SF204, TSPY |  |
| TSPYL4      | TSPY-like 4                                                        | RP3-486I3.2, dJ486I3.2                                                |  |
| TSPYL5      | TSPY-like 5                                                        |                                                                       |  |
| TSTD2       | Thiosulfate sulfurtransferase (thioanase)-like domain containing 2 | RP11-244N9.5, C9orf97                                                 |  |
| TTBK1       | Tau tubulin kinase 1                                               | RP3-330M21.4, BDTK                                                    |  |
| TTC14       | Tetratricopeptide repeat domain 14                                 | UNQ5813, DRDL5813, PRO19630                                           |  |
| TTC15       | Tetratricopeptide repeat domain 15                                 | TRAPPC12                                                              |  |
| TTC23       | Tetratricopeptide repeat domain 23                                 | HCC8, HCC-8                                                           |  |
| TTC23L      | Tetratricopeptide repeat domain 23-like                            | MC25-1                                                                |  |
| TTC28       | Tetratricopeptide repeat domain 28                                 | RP3-477H23.1, TPRBK                                                   |  |
| TTC30B      | Tetratricopeptide repeat domain 30B                                | IFT70, fleur                                                          |  |
| TTC32       | Tetratricopeptide repeat domain 32                                 |                                                                       |  |
| TTC33       | Tetratricopeptide repeat domain 33                                 | OSRF                                                                  |  |
| TTC35       |                                                                    |                                                                       |  |
| TTC38       | Tetratricopeptide repeat domain 38                                 | LL22NC03-5H6.5                                                        |  |
| TTC39A      | Tetratricopeptide repeat domain 39A                                | C1orf34, DEME-6                                                       |  |
| TTC39C      | Tetratricopeptide repeat domain 39C                                | C18orf17, HsT2697                                                     |  |
| TTC5        | Tetratricopeptide repeat domain 5                                  | Strap                                                                 |  |
| TTC8        | Tetratricopeptide repeat domain 8                                  | BBS8, RP51                                                            |  |

|         |                                                               |                                                        |  |
|---------|---------------------------------------------------------------|--------------------------------------------------------|--|
| TTC9    | Tetratricopeptide repeat domain 9                             | TTC9A                                                  |  |
| TTF1    | Transcription termination factor, RNA                         | TTF-1, TTF-I                                           |  |
| TTLL13  | Tubulin tyrosine ligase-like family, member 13                |                                                        |  |
| TTLL2   | Tubulin tyrosine ligase-like family, member 2                 | C6orf104, NYD-TSPG, dJ366N23.3                         |  |
| TTLL3   | Tubulin tyrosine ligase-like family, member 3                 | PRO0207, HOTTL                                         |  |
| TTLL5   | Tubulin tyrosine ligase-like family, member 5                 | CORD19, KIAA0998, STAMP                                |  |
| TTLL7   | Tubulin tyrosine ligase-like family, member 7                 | RP5-836J3.2                                            |  |
| TTPAL   | Tocopherol (alpha) transfer protein-like                      | RP1-179M20.4, C20orf121                                |  |
| TTY1    | Testis-specific transcript, 1-linked 1 (non-protein coding)   | LINC00033, NCRNA00033, TTY1                            |  |
| TTY12   | Testis-specific transcript, 1-linked 12 (non-protein coding)  | TTY11; TTY12; NCRNA00135                               |  |
| TTY15   | Testis-specific transcript, 1-linked 15 (non-protein coding)  | NCRNA00138                                             |  |
| TTY23B  | Testis-specific transcript, 1-linked 23B (non-protein coding) | TTY23                                                  |  |
| TTY2B   | Testis-specific transcript, 1-linked 2B (non-protein coding)  |                                                        |  |
| TTY4B   | Testis-specific transcript, 1-linked 4B (non-protein coding)  | LINC00124; NCRNA00124                                  |  |
| TTY6    | Testis-specific transcript, 1-linked 6 (non-protein coding)   | TTY6; TTY6A; LINC00127; NCRNA00127                     |  |
| TTY6B   | Testis-specific transcript, 1-linked 6B (non-protein coding)  | TTY6; TTY6; LINC00128; NCRNA00128                      |  |
| TTY7    | Testis-specific transcript, 1-linked 7 (non-protein coding)   | TTY7; TTY7A; TTY7B; LINC00129; NCRNA00129, CLONE705702 |  |
| TTY7B   | Testis-specific transcript, 1-linked 7B (non-protein coding)  | NCRNA00215                                             |  |
| TTYH1   | Tweety family member 1                                        | XXbac-BCX535A19.1                                      |  |
| TTYH2   | Tweety family member 2                                        | C17orf29                                               |  |
| TUB     | Tubby bipartite transcription factor                          | rd5                                                    |  |
| TUBAL3  | Tubulin, alpha-like 3                                         |                                                        |  |
| TUBB    | Tubulin, beta class I                                         | DAAF-285E11.4, CDCBM0, M40, ON/SW-CL501, TUBB5, TUBB   |  |
| TUBE1   | Tubulin, epsilon 1                                            | RP1-142L7.1, TUBE, dJ142L7.2                           |  |
| TUBGCP4 | Tubulin, gamma complex associated protein 4                   | 76P, GCP-4, GCP4, Grip76                               |  |
| TUFM    | Tu translation elongation factor, mitochondrial               | COXPD4, EF-TuMT, EFTU, P43                             |  |
| TUFT1   | Tuftelin 1                                                    | RP11-74C1.1                                            |  |
| TUG1    | Taurine up-regulated 1 (non-protein coding)                   | LINC00080, NCRNA00080, TI-227H                         |  |
| TULP3   | Tubby like protein 3                                          | TUBL3                                                  |  |
| TULP4   | Tubby like protein 4                                          | RP3-442A17.1, TUSP                                     |  |
| TUSC3   | Tumor suppressor candidate 3                                  | D8S1992, M33, MRT22, MRT7, N33, OST3A                  |  |
| TUSC5   | Tumor suppressor candidate 5                                  | DSPB1, IFITMD3, LOST1                                  |  |
| TWF1    | Twinfilin actin-binding protein 1                             | A6, PTK9                                               |  |



|         |                                                                   |                                                                              |   |
|---------|-------------------------------------------------------------------|------------------------------------------------------------------------------|---|
| TWIST1  | Twist family bHLH transcription factor 1                          | ACS3, DPES2, DPES3, CRS, CRST, SC3, TWIST, LHLH29                            |   |
| TWISTNB | TWIST neighbor                                                    |                                                                              |   |
| TXK     | TXK tyrosine kinase                                               | BTKL, PSCTK5, PTK4, RLK, TKL                                                 |   |
| TXLNA   | Taxilin alpha                                                     | RP4-622L5.4, IL14, TXLN                                                      |   |
| TXLNB   | Taxilin beta                                                      | RP3-522B19.2, C6orf198, LST001, MDP77, dJ522B19.2                            |   |
| TXLNG   | Taxilin gamma                                                     | RP11-710A19.4, CA0H13, ELNG, FIAT, LSK2A, TXLNG                              |   |
| TXNDC12 | Thioredoxin domain containing 12<br>( <i>condensin subunit</i> )  | TXNDC12/TKO1370, AOT, AOK1, EKT10, EKT18, ERD10, DDIA16, TLD10, LAG1, LTLD10 |   |
| TXNDC15 | Thioredoxin domain containing 15                                  | UNQ335/PRO534, C5orf14, UNQ335                                               |   |
| TXNDC17 | Thioredoxin domain containing 17                                  | TRP14, TXNL5                                                                 |   |
| TXNDC2  | Thioredoxin domain containing 2<br>( <i>sporotrichum</i> )        | SPTRX, SPTRX1                                                                |   |
| TXNDC3  |                                                                   |                                                                              |   |
| TXNRD1  | Thioredoxin reductase 1                                           | GRIM-12, TR, TR1, TRXR1, TXNR                                                |   |
| TYSND1  | Trypsin domain containing 1                                       | NET41                                                                        |   |
| U2AF1   | U2 small nuclear RNA auxiliary factor 1                           | FP793, RN, RNU2AF1, U2AF35, U2AFBP                                           | √ |
| UACA    | Ovarian autoantigen with conserved domains<br>and unknown repeats | NUCLING                                                                      |   |
| UBA5    | Ubiquitin-like modifier activating enzyme 5                       | THIFP1, UBE1DC1                                                              |   |
| UBA6    | Ubiquitin-like modifier activating enzyme 6                       | E1-L2, MOP-4, UBE1L2                                                         |   |
| UBAC1   | UBA domain containing 1                                           | RP11-432J22.3, GBDR1, UBADC1                                                 |   |
| UBAC2   | UBA domain containing 2                                           | RP11-178C10.1, PHGDHL1                                                       |   |
| UBAP1   | Ubiquitin associated protein 1                                    | RP11-571F15.1, NAG20, UAP, UBAP, UBAP-1                                      |   |
| UBAP2   | Ubiquitin associated protein 2                                    | RP11-176F3.6, UBAP-2                                                         |   |
| UBAP2L  | Ubiquitin associated protein 2-like                               | RP11-205M9.4, NICE-4                                                         |   |
| UBASH3A | Ubiquitin associated and SH3 domain<br>containing A               | CLIP4, STS-2, TULA, TULA-1                                                   |   |
| UBASH3B | Ubiquitin associated and SH3 domain<br>containing B               | STS-1, STS1, TULA-2, p70                                                     |   |
| UBE2A   | Ubiquitin-conjugating enzyme E2A                                  | HHR6A, MRXS30, MRXSN, RAD6A, UBC2                                            |   |
| UBE2B   | Ubiquitin-conjugating enzyme E2B                                  | E2-17kDa, HHR6B, HR6B, RAD6B, UBC2                                           |   |
| UBE2CBP | Ubiquitin protein ligase E3D                                      | RP4-751H9.1, C6orf157, H10BH, UBE2CBP, YJR141W                               |   |
| UBE2D1  | Ubiquitin-conjugating enzyme E2D 1                                | E2(17)KB1, SFT, UBC4/5, UBCH5, UBCH5A                                        |   |
| UBE2D3  | Ubiquitin-conjugating enzyme E2D 3                                | E2(17)KB3, UBC4/5, UBCH5C                                                    |   |
| UBE2E1  | Ubiquitin-conjugating enzyme E2E 1                                | UBCH6                                                                        |   |
| UBE2F   | Ubiquitin-conjugating enzyme E2F<br>( <i>containing</i> )         | NCE2                                                                         |   |
| UBE2G1  | Ubiquitin-conjugating enzyme E2G 1                                | E217K, UBC7, UBE2G                                                           |   |
| UBE2J1  | Ubiquitin-conjugating enzyme E2, J1                               | CGI-70, HSPC153, HSPC203, HSO95243, NCUBE-1, NCUBE1, UBC6, Ubc6              |   |

|          |                                                         |                                                                     |   |
|----------|---------------------------------------------------------|---------------------------------------------------------------------|---|
| UBE2K    | Ubiquitin-conjugating enzyme E2K                        | E2-25K, HIP2, HYPG, LIG, UBC1                                       |   |
| UBE2L3   | Ubiquitin-conjugating enzyme E2L 3                      | E2-F1, L-UBC, UBCH7, UbcM4                                          |   |
| UBE2M    | Ubiquitin-conjugating enzyme E2M                        | UBC-RS2, UBC12, hUbc12                                              |   |
| UBE2O    | Ubiquitin-conjugating enzyme E2O                        | E2-230K                                                             |   |
| UBE2Q1   | Ubiquitin-conjugating enzyme E2Q family-1               | PRO3094, GTAP, NICE-5, UBE2Q                                        |   |
| UBE2Q2P2 | Ubiquitin-conjugating enzyme E2Q family-1               | UBE2QP2; UBE2Q2P3                                                   |   |
| UBE2QL1  | Ubiquitin-conjugating enzyme E2Q family-1               |                                                                     |   |
| UBE2R2   | Ubiquitin-conjugating enzyme E2R 2                      | RP11-176F3.4, CDC34B, E2-CDC34B, UBC3B                              |   |
| UBE2W    | Ubiquitin-conjugating enzyme E2w (containing)           | UBC-16, UBC16                                                       |   |
| UBE2Z    | Ubiquitin-conjugating enzyme E2Z                        | HOYS7, USE1                                                         |   |
| UBE3A    | Ubiquitin protein ligase E3A                            | ANCR, AS, E6-AP, EPVE6AP, HPVE6A                                    |   |
| UBE3B    | Ubiquitin protein ligase E3B                            | BPIDS                                                               |   |
| UBE3C    | Ubiquitin protein ligase E3C                            | tcag7.998, HECTH2                                                   |   |
| UBE4A    | Ubiquitination factor E4A                               | E4, UBOX2, UFD2                                                     |   |
| UBE4B    | Ubiquitination factor E4B                               | E4, HDNB1, UBOX3, UFD2, UFD2A                                       |   |
| UBIAD1   | UbiA prenyltransferase domain containing 1              | RP4-796F18.1, SCCD, TERE1                                           |   |
| UBL3     | Ubiquitin-like 3                                        | HCG-1, PNSC1                                                        |   |
| UBL4A    | Ubiquitin-like 4A                                       | AA1W89051D12.1, DA254E, DA3254E, GUPD, GDA, GEF5, MDX2, TMA24, UBL4 |   |
| UBL4B    | Ubiquitin-like 4B                                       |                                                                     |   |
| UBN2     | Ubinuclein 2                                            | tcag7.1228                                                          |   |
| UBP1     | Upstream binding protein 1 (LBP-1a)                     | LBP-1B, LBP-1a, LBP1A, LBP1B                                        |   |
| UBQLNL   | Ubiquilin-like                                          |                                                                     |   |
| UBR2     | Ubiquitin protein ligase E3 component n-                | RP5-392M17.3, C00H155, DA49A4.1, GJ242G1.1, H202M17.2               |   |
| UBR3     | Ubiquitin protein ligase E3 component n-                | ZNF650                                                              |   |
| UBR4     | Ubiquitin protein ligase E3 component n-                | RP5-1126H10.1, RBAF600, ZUBR1, p600                                 |   |
| UBR5     | Ubiquitin protein ligase E3 component n-                | DD5, EDD, EDD1, HYD                                                 | v |
| UBTD2    | Ubiquitin domain containing 2                           | SB72, DCUBP                                                         |   |
| UBTF     | Upstream binding transcription factor, RNA polymerase I | NOR-90, UBF, UBF-1, UBF1, UBF2                                      |   |
| UBXN10   | UBX domain protein 10                                   | UBXD3                                                               |   |
| UBXN2B   | UBX domain protein 2B                                   | p37                                                                 |   |
| UBXN8    | UBX domain protein 8                                    | D8S2298E, REP8, UBXD6                                               |   |
| UCHL5    | Ubiquitin carboxyl-terminal hydrolase L5                | RP11-101E13.2, CGI-70, INO80R, UCH-L5, UCH37                        |   |
| UCK1     | Uridine-cytidine kinase 1                               | RP11-334J6.5, URK1                                                  |   |

|           |                                                                                                                   |                                                                                                                                           |  |
|-----------|-------------------------------------------------------------------------------------------------------------------|-------------------------------------------------------------------------------------------------------------------------------------------|--|
| UCP3      | Uncoupling protein 3 (mitochondrial, proton carrier)                                                              | SLC25A9                                                                                                                                   |  |
| UFD1L     | Ubiquitin fusion degradation 1 like (yeast)                                                                       | UFD1                                                                                                                                      |  |
| UFM1      | Ubiquitin-fold modifier 1                                                                                         | RP11-131P10.1, BM-002, C13orf20                                                                                                           |  |
| UFSP2     | UFM1-specific peptidase 2                                                                                         | C4orf20                                                                                                                                   |  |
| UGDH      | UDP-glucose 6-dehydrogenase                                                                                       | GDH, UDP-GlcDH, UDPGDH, UGD                                                                                                               |  |
| UGGT1     | UDP-glucose glycoprotein                                                                                          | HUGT1, UGCGL1, UGT1                                                                                                                       |  |
| UGGT2     | UDP-glucose glycoprotein                                                                                          | RP11-31K22.2, HUGT2, UGCGL2, UGT2                                                                                                         |  |
| UGT1A1    | UDP-glucuronosyltransferase 1 family, UDP-glucuronosyltransferase 1 family, UDP-glucuronosyltransferase 1 family, | BELQTE1, GNT1, HUG-BKT, UDPGT, UDPGT 1-1, UGT1, UGT1A                                                                                     |  |
| UGT1A10   | UDP-glucuronosyltransferase 1 family, UDP-glucuronosyltransferase 1 family,                                       | UDPGT, UGT-1J, UGT1-10, UGT1.10, UGT1J                                                                                                    |  |
| UGT1A3    | UDP-glucuronosyltransferase 1 family, UDP-glucuronosyltransferase 1 family,                                       | UDPGT, UDPGT 1-3, UGT-1C, UGT1-03, UGT1.3, HCT-BKZ, UDPGT, UDPGT 1-4, UGT-1D, UGT1-04, UGT1.4, UGT1D                                      |  |
| UGT1A4    | UDP-glucuronosyltransferase 1 family, UDP-glucuronosyltransferase 1 family,                                       | UDPGT, UDPGT 1-5, UGT1E                                                                                                                   |  |
| UGT1A5    | UDP-glucuronosyltransferase 1 family, UDP-glucuronosyltransferase 1 family,                                       | GNT1, HUGGT, HUGGT1, UDPGT, UDPGT 1-6, UGT1F, UGT1F-7, UGT-1G, UGT1-07, UGT1.7, UGT1G, UDPGT 1-8, UGT-1H, UGT1-08, UGT1.8S, UGT1H, UGT1A8 |  |
| UGT1A6    | UDP-glucuronosyltransferase 1 family, UDP-glucuronosyltransferase 1 family,                                       |                                                                                                                                           |  |
| UGT1A7    | UDP-glucuronosyltransferase 1 family, UDP-glucuronosyltransferase 1 family,                                       |                                                                                                                                           |  |
| UGT1A8    | UDP-glucuronosyltransferase 1 family, UDP-glucuronosyltransferase 1 family,                                       |                                                                                                                                           |  |
| UGT2B28   | UDP-glucuronosyltransferase 2 family, UDP-glucuronosyltransferase 2 family,                                       |                                                                                                                                           |  |
| UHMK1     | U2AF homology motif (UHM) kinase 1                                                                                | KIS, KIST, P-CIP2                                                                                                                         |  |
| UHRF1     | Ubiquitin-like with F1D and ring finger domains 1                                                                 | ICBP90, Np95, RNF106, hNP95, hUHRF1, huNp95                                                                                               |  |
| UHRF1BP1  | UHRF1 binding protein 1                                                                                           | RP3-349A12.1, C6orf107, ICBP90, dJ349A12.1                                                                                                |  |
| UHRF1BP1L | UHRF1 binding protein 1-like                                                                                      | SHIP164                                                                                                                                   |  |
| UHRF2     | Ubiquitin-like with F1D and ring finger domains 2, F2 ubiquitin protein ligase                                    | RP11-472F14.2, NIRF, RNF107, URF2                                                                                                         |  |
| UIMC1     | Ubiquitin interaction motif containing 1                                                                          | RAP80, X2HRIP110                                                                                                                          |  |
| ULK1      | Unc-51 like autophagy activating kinase 1                                                                         | ATG1, ATG1A, UNC51, Unc51.1, hATG1                                                                                                        |  |
| ULK2      | Unc-51 like kinase 2                                                                                              | RP25-278F12.3, A630063122KIK, AC015540, UNC51.2, KIAA0622                                                                                 |  |
| ULK3      | Unc-51 like kinase 3                                                                                              |                                                                                                                                           |  |
| ULK4      | Unc-51 like kinase 4                                                                                              | hCG_1996673, FAM7C1, REC01035                                                                                                             |  |
| UMPS      | Uridine monophosphate synthetase                                                                                  | OK/SW-cl.21, OPRT                                                                                                                         |  |
| UNC119B   | Unc-119 homolog B ( <i>C. elegans</i> )                                                                           | hCG_27366, POC7B                                                                                                                          |  |
| UNC13A    | Unc-13 homolog A ( <i>C. elegans</i> )                                                                            | Munc13-1                                                                                                                                  |  |
| UNC13C    | Unc-13 homolog C ( <i>C. elegans</i> )                                                                            | Unc13h3                                                                                                                                   |  |
| UNC45B    | Unc-45 homolog B ( <i>C. elegans</i> )                                                                            | CMYA4, SMUNC45, UNC45                                                                                                                     |  |
| UNC5A     | Unc-5 homolog A ( <i>C. elegans</i> )                                                                             | UNC5H1                                                                                                                                    |  |
| UNC5B     | Unc-5 homolog B ( <i>C. elegans</i> )                                                                             | RP11-5801.1, UNC5H2, p53RDL1                                                                                                              |  |

|         |                                                                  |                                                                                                                                   |  |
|---------|------------------------------------------------------------------|-----------------------------------------------------------------------------------------------------------------------------------|--|
| UNC5D   | Unc-5 homolog D ( <i>C. elegans</i> )                            | UNQ6012/PRO34692, PRO34692, Unc5h4                                                                                                |  |
| UNC80   | Unc-80 homolog ( <i>C. elegans</i> )                             | C2orf21, UNC-80                                                                                                                   |  |
| UNKL    | Unkempt family zinc finger-like                                  | LA16c-316G12.1, C16orf28, ZC3H5L, ZC3HDC5L                                                                                        |  |
| UPB1    | Ureidopropionase, beta                                           | BUP1                                                                                                                              |  |
| UPF0639 |                                                                  |                                                                                                                                   |  |
| UPP2    | Uridine phosphorylase 2                                          | UDRPASE2, UP2, UPASE2                                                                                                             |  |
| UPRT    | Uridine phosphorylase (UPRT)                                     | RP11-311P8.3, FUR1, UPP                                                                                                           |  |
| UQCC    | Ubiquinol-cytochrome c reductase complex                         | BOS_13488C20orf44                                                                                                                 |  |
| UQCR11  | Ubiquinol-cytochrome c reductase, complex                        | 0710008D09Rik, QCR10, UQCR                                                                                                        |  |
| URB1    | URB1 mitosome biogenesis 1 homolog (D. rerio)                    | C21orf108, NPA1                                                                                                                   |  |
| URM1    | Ubiquitin-related modifier URM1                                  | YIL008W                                                                                                                           |  |
| USH1G   | Usher syndrome 1G (autosomal recessive)                          | ANKS4A, SANS                                                                                                                      |  |
| USH2A   | Usher syndrome 2A (autosomal recessive, mild)                    | RP39, US2, USH2, dJ1111A8.1                                                                                                       |  |
| USO1    | USO1 vesicle transport factor                                    | P115, TAP, VDP                                                                                                                    |  |
| USP1    | Ubiquitin specific peptidase 1                                   | UBP                                                                                                                               |  |
| USP13   | Ubiquitin specific peptidase 13 (isopeptidase)                   | ISOT3, IsoT-3                                                                                                                     |  |
| USP14   | Ubiquitin specific peptidase 14 (ubiquitin-specific peptidase)   | UNPH-2, UNPH4                                                                                                                     |  |
| USP15   | Ubiquitin specific peptidase 15                                  | UNPH-2, UNPH4                                                                                                                     |  |
| USP17   | Ubiquitin specific peptidase 17-like family member 0, pseudogene | hCG_180774Z, KS447, USP17, USP17A, USP17B, USP17C, USP17D, USP17E, USP17F, USP17G, USP17H, USP17I, USP17J, USP17K, USP17L, USP17M |  |
| USP2    | Ubiquitin specific peptidase 2                                   | UBP41, USP9                                                                                                                       |  |
| USP24   | Ubiquitin specific peptidase 24                                  | hCG_33036                                                                                                                         |  |
| USP25   | Ubiquitin specific peptidase 25                                  | USP21                                                                                                                             |  |
| USP28   | Ubiquitin specific peptidase 28                                  |                                                                                                                                   |  |
| USP31   | Ubiquitin specific peptidase 31                                  | RP11-20G6.3                                                                                                                       |  |
| USP32   | Ubiquitin specific peptidase 32                                  | NY-REN-60, USP10                                                                                                                  |  |
| USP33   | Ubiquitin specific peptidase 33                                  | VDU1                                                                                                                              |  |
| USP36   | Ubiquitin specific peptidase 36                                  | DUB1                                                                                                                              |  |
| USP37   | Ubiquitin specific peptidase 37                                  |                                                                                                                                   |  |
| USP40   | Ubiquitin specific peptidase 40                                  |                                                                                                                                   |  |
| USP42   | Ubiquitin specific peptidase 42                                  | tcag7.880                                                                                                                         |  |
| USP45   | Ubiquitin specific peptidase 45                                  | RP11-98I9.5                                                                                                                       |  |
| USP46   | Ubiquitin specific peptidase 46                                  |                                                                                                                                   |  |
| USP47   | Ubiquitin specific peptidase 47                                  | TRFP                                                                                                                              |  |

|        |                                                                        |                                                 |  |
|--------|------------------------------------------------------------------------|-------------------------------------------------|--|
| USP53  | Ubiquitin specific peptidase 53                                        |                                                 |  |
| USP54  | Ubiquitin specific peptidase 54                                        | RP11-137L10.4, C10orf29, bA137L10.3, bA137L10.4 |  |
| USP6NL | USP6 N-terminal like                                                   | RP11-89C21.1, RNTRE, TRE2NL-IT1, USP6NL         |  |
| USP8   | Ubiquitin specific peptidase 8                                         | HumORF8, SPG59, UBPY                            |  |
| USP9X  | Ubiquitin specific peptidase 9, X-linked                               | RP5-1172N10.4, DFFRX, FAF, FAM, MRX99           |  |
| USP9Y  | Ubiquitin specific peptidase 9, Y-linked                               | DFFRY, SPGFY2                                   |  |
| USPL1  | Ubiquitin specific peptidase like 1                                    | RP11-121O19.1, C13orf22, D13S106E, bA121O19.1   |  |
| UST    | Uronyl-2-sulfotransferase                                              | 2OST                                            |  |
| UTP23  | UTP23, small subunit (SSU) processome component homolog (ustp23)       | C8orf53                                         |  |
| UTRN   | Utrophin                                                               | RP11-352E13.1, DMDL, DRP, DRP1                  |  |
| UTS2   | Urotensin 2                                                            | UNQ525/PRO1068, PRO1068, U-II, UCN2, UII        |  |
| UVRAG  | UV radiation resistance associated                                     | DHTX, VPS38, p63                                |  |
| VAMP1  | Vesicle-associated membrane protein 1 (amphiphysin 1)                  | SPAX1, SYB1, VAMP-1                             |  |
| VAMP4  | Vesicle-associated membrane protein 4                                  | RP4-560B9.3, VAMP-4, VAMP24                     |  |
| VAMP7  | Vesicle-associated membrane protein 7                                  | SYBL1, TI-VAMP, TIVAMP, VAMP-7                  |  |
| VANGL1 | VANGL planar cell polarity protein 1                                   | KITENIN, LPP2, STB2, STBM2                      |  |
| VAPA   | VAMP (vesicle-associated membrane protein) associated protein A and C  | VAP-33, VAP-A, VAP33, hVAP-33                   |  |
| VAPB   | VAMP (vesicle-associated membrane protein) associated protein B and C  | RP5-1018E9.1, ALS8, VAMP-B, VAP-B               |  |
| VARS2  | Valyl-tRNA synthetase 2, mitochondrial                                 | DADB-100J14.5, COXFD20, VALKSL, VARSL, VARS2    |  |
| VASH1  | Vasohibin 1                                                            | KIAA1036                                        |  |
| VASH2  | Vasohibin 2                                                            | RP11-275G3.1                                    |  |
| VAT1L  | Vesicle amine transport 1-like                                         |                                                 |  |
| VAV3   | Vav 3 guanine nucleotide exchange factor                               |                                                 |  |
| VAX1   | Ventral anterior homeobox 1                                            | RP11-501J20.1, MCOPS11                          |  |
| VBP1   | Von Hippel-Lindau binding protein 1                                    | RP13-228J13.4, PFD3, PFDN3, VBP-1               |  |
| VCAM1  | Vascular cell adhesion molecule 1                                      | CD106, INCAM-100                                |  |
| VCAN   | Versican                                                               | CSPG2, ERVR, GHAP, PG-M, WGN, WGN1              |  |
| VCL    | Vinculin                                                               | RP11-178G10.3, CMD1W, CMT15, HELL14, MV, MYCL   |  |
| VCPIP1 | Vasoinhibin containing protein (p97)/p47 complex interacting protein 1 | DUBA3, VCIP135                                  |  |
| VCX    | Variable charge, X-linked                                              | VCX-10r-B1, VCX1, VCX10R, VCXB1, VCX            |  |
| VCX2   | Variable charge, X-linked 2                                            | VCX-2rR, VCXB, VCX2                             |  |
| VCX3A  | Variable charge, X-linked 3A                                           | VCX3; VCXA; VCX-A; VCX8R; VCX-8r                |  |
| VCX3B  | Variable charge, X-linked 3B                                           | VCX-C, VCXC                                     |  |

|          |                                                               |                                                                                                                                  |  |
|----------|---------------------------------------------------------------|----------------------------------------------------------------------------------------------------------------------------------|--|
| VCY      | Variable charge, Y-linked                                     | BPY11, VCY1A, VCY                                                                                                                |  |
| VCY1B    | Variable charge, Y-linked 1B                                  | BPY1B                                                                                                                            |  |
| VDAC1    | Voltage-dependent anion channel 1                             | PORIN, VDAC-1                                                                                                                    |  |
| VDR      | vitamin D (1,25- dihydroxyvitamin D3) receptor                | NR111, PPP1R163                                                                                                                  |  |
| VEGFA    | Vascular endothelial growth factor A                          | RP1-261G23.1, MVCD1, VEGF, VPF                                                                                                   |  |
| VEPH1    | ventricular zone expressed 11 domain-containing 1             | MELT, VEPH                                                                                                                       |  |
| VEZF1    | Vascular endothelial zinc finger 1                            | DB1, ZNF161                                                                                                                      |  |
| VEZT     | vezatin, adherens junctions transmembrane protein             | VEZATIN                                                                                                                          |  |
| VGLL2    | Vestigial-like family member 2                                | RP1-179P9.2, VGL2, VITO1                                                                                                         |  |
| VGLL3    | Vestigial-like family member 3                                | VGL-3, VGL3                                                                                                                      |  |
| VGLL4    | Vestigial-like family member 4                                | VGL-4                                                                                                                            |  |
| VIP      | Vasoactive intestinal peptide                                 | RP4-546K19.1, PHM27                                                                                                              |  |
| VIPR1    | Vasoactive intestinal peptide receptor 1                      | IPVK1, II, PACAF-K2, PACAF-K2, KDC1, VTRG, UAGP30.1, UBD1, VPR3, VPR7, VPR5, PACAF-K3, PACAF-R2, VIP-R-2, VPAC2, VPAC3B, VPACR3B |  |
| VIPR2    | Vasoactive intestinal peptide receptor 2                      |                                                                                                                                  |  |
| VLDLR    | Very low density lipoprotein receptor                         | RP11-320E16.1, CARMQ1, CHRMQ1CH, VLDLR                                                                                           |  |
| VMA21    | VMA21 vacuolar H <sup>+</sup> -ATPase homolog (S. cerevisiae) | MEAX, XMEA                                                                                                                       |  |
| VN1R103P | Vomer nasal 1 receptor 103 pseudogene                         | MEAX, XMEA                                                                                                                       |  |
| VNN2     | Vanin 2                                                       | FOAP-4, GPI-80                                                                                                                   |  |
| VPRBP    | Vpr (HIV-1) binding protein                                   | DCAF1                                                                                                                            |  |
| VPS13A   | vacuolar protein sorting 13 homolog A (S. cerevisiae)         | RP11-498N2.1, CHAC, CHOREIN                                                                                                      |  |
| VPS13B   | vacuolar protein sorting 13 homolog B (S. cerevisiae)         | CHS1, COH1                                                                                                                       |  |
| VPS13C   | vacuolar protein sorting 13 homolog C (S. cerevisiae)         |                                                                                                                                  |  |
| VPS13D   | vacuolar protein sorting 13 homolog D (S. cerevisiae)         |                                                                                                                                  |  |
| VPS24    |                                                               |                                                                                                                                  |  |
| VPS26A   | vacuolar protein sorting 26 homolog A (S. cerevisiae)         | HB58, Hbeta58, PEP8A, VPS26                                                                                                      |  |
| VPS33B   | vacuolar protein sorting 33 homolog B (S. cerevisiae)         |                                                                                                                                  |  |
| VPS36    | vacuolar protein sorting 36 homolog (S. cerevisiae)           | CGI-145, C13orf9, EAP45                                                                                                          |  |
| VPS37A   | vacuolar protein sorting 37 homolog A (S. cerevisiae)         | HCRP1, PQBP2, SPG53                                                                                                              |  |
| VPS37C   | vacuolar protein sorting 37 homolog C (S. cerevisiae)         |                                                                                                                                  |  |
| VPS39    | vacuolar protein sorting 39 homolog (S. cerevisiae)           | TLP, VAM6, hVam6p                                                                                                                |  |
| VPS41    | vacuolar protein sorting 41 homolog (S. cerevisiae)           | HVPS41, HVSP41, hVps41p                                                                                                          |  |
| VPS45    | vacuolar protein sorting 45 homolog (S. cerevisiae)           | RP11-45817.2, III, III VPS45, SCN5A, VPS45B, VPS44, VPS45, VPS45A, VPS45                                                         |  |
| VPS53    | vacuolar protein sorting 53 homolog (S. cerevisiae)           | PP13624, HCCS1, PCH2E, hVps53L, pp13624                                                                                          |  |

|        |                                                                                                   |                                                                     |   |
|--------|---------------------------------------------------------------------------------------------------|---------------------------------------------------------------------|---|
| VPS54  | vacuolar protein sorting 34 homolog (S. cerevisiae)                                               | HCC8, PPP1R164, SLP-8pL, WR, hVps54L, VPS54                         |   |
| VPS72  | vacuolar protein sorting 72 homolog (S. cerevisiae)                                               | RP11-68I18.8, CFL1, Swc2, TCFL1, YL-1, YL1                          |   |
| VPS8   | vacuolar protein sorting 8 homolog (S. cerevisiae)                                                | YAL002WFUN15, VPL8, VPT8                                            |   |
| VRK2   | Vaccinia related kinase 2                                                                         |                                                                     |   |
| VRK3   | Vaccinia related kinase 3                                                                         |                                                                     |   |
| VSIG1  | v-set and immunoglobulin domain containing 10                                                     | RP5-889N15.1, 1700062D20Rik, GPA34, dJ889N15.1                      |   |
| VSIG10 | v-set and immunoglobulin domain containing 10                                                     |                                                                     |   |
| VSNL1  | Visinin-like 1                                                                                    | HLP3, HPCAL3, HUVISL1, VILIP, VILIP-1                               |   |
| VSTM2A | v-set and transmembrane domain containing 2A                                                      |                                                                     |   |
| VSX1   | Visual system homeobox 1                                                                          | RP5-1025A1.1, CAASDS, KTCN, KTCN1, PCD, PDCD1, PPD, PNYX            |   |
| VSX2   | Visual system homeobox 2                                                                          | CHX10, HOX10, MCOP2, MCOPCB3, RET1                                  |   |
| VTG1   | Vesicle (multivesicular body) trafficking 1                                                       | HSPC228, C6orf55, DRG-1, DRG1, LIP5, My012, SBP1                    |   |
| VTCN1  | v-set domain containing 1 cell activation                                                         | RP11-227A19.4, D7-114, D7-114, D7-51, D7-A, D7-11.5, PDC1201, VTCN1 |   |
| VTI1A  | vesicle transport through interaction with t-SNARE domain containing factor A domain containing 1 | RP11-25C19.2, MMDS3, MVti1, VTI1RP2, Vti1-rp2                       | v |
| VWA2   | Von Willebrand factor A domain containing 2                                                       | AMACO, CCSP-2, NET42                                                |   |
| VWA3B  | Von Willebrand factor A domain containing 3B                                                      |                                                                     |   |
| VWA5A  | Von Willebrand factor A domain containing 5A                                                      | BCSC-1, BCSC1, LOH11CR2A                                            |   |
| VWA5B1 | Von Willebrand factor A domain containing 5B1                                                     |                                                                     |   |
| VWC2L  | Von Willebrand factor C domain containing protein 2 like                                          |                                                                     |   |
| VWCE   | Von Willebrand factor C and EGF domains                                                           | URG11, VWC1                                                         |   |
| WAPAL  | Wings apart-like homolog (Drosophila)                                                             | RP11-396M20.1, FOE, KIAA0261, WAPL                                  |   |
| WARS   | Tryptophanyl-tRNA synthetase                                                                      | GAMMA-2, IFI53, IFP53                                               |   |
| WASF1  | WAS protein family, member 1                                                                      | RP11-181P4.1, SCAR1, WAVE, WAVE1                                    |   |
| WASF2  | WAS protein family, member 2                                                                      | IMD2, SCAR2, WASF4, WAVE2, dJ393P12.2                               |   |
| WASF3  | WAS protein family, member 3                                                                      | RP11-496O3.2, Brush-1, SCAR3, WAVE3                                 |   |
| WASL   | Wiskott-Aldrich syndrome-like                                                                     | N-WASP, NWASP                                                       |   |
| WBP2NL | WBP2 N-terminal like                                                                              | CTA-250D10.11-006, PAWP                                             |   |
| WDFY1  | WD repeat and FYVE domain containing 1                                                            | FENS-1, WDF1, ZFYVE17                                               |   |
| WDFY3  | WD repeat and FYVE domain containing 3                                                            | ALFY, ZFYVE25                                                       |   |
| WDR17  | WD repeat domain 17                                                                               |                                                                     |   |
| WDR20  | WD repeat domain 20                                                                               | DMR                                                                 |   |
| WDR26  | WD repeat domain 26                                                                               | PRO0852, CDW2, GID7, MIP2                                           |   |
| WDR27  | WD repeat domain 27                                                                               |                                                                     |   |

|         |                                                                                              |                                                                                |   |
|---------|----------------------------------------------------------------------------------------------|--------------------------------------------------------------------------------|---|
| WDR33   | WD repeat domain 33                                                                          | NET14, WDC146                                                                  |   |
| WDR35   | WD repeat domain 35                                                                          | CED2, IFT121, IFTA1, SRTD7                                                     |   |
| WDR36   | WD repeat domain 36                                                                          | GLC1G, TA-WDRP, TAWDRP, UTP21                                                  |   |
| WDR37   | WD repeat domain 37                                                                          | RP11-529L18.2                                                                  |   |
| WDR4    | WD repeat domain 4                                                                           | TRM82, TRMT82                                                                  |   |
| WDR43   | WD repeat domain 43                                                                          | NET12, UTP5                                                                    |   |
| WDR45L  | WDR45-like                                                                                   | BOS_19349                                                                      |   |
| WDR47   | WD repeat domain 47                                                                          | RP25-128G10.4, T810075M12NIK, AA352998,<br>...ZTA_A0802                        |   |
| WDR60   | WD repeat domain 60                                                                          | tcag7.557, FAP163, SRPS6, SRTD8                                                |   |
| WDR61   | WD repeat domain 61                                                                          | REC14, SKI8                                                                    |   |
| WDR62   | WD repeat domain 62                                                                          | C19orf14, MCPH2                                                                |   |
| WDR63   | WD repeat domain 63                                                                          | DIC3, NYD-SP29                                                                 |   |
| WDR66   | WD repeat domain 66                                                                          | CaM-IP4                                                                        |   |
| WDR67   | WD repeat domain 67                                                                          |                                                                                |   |
| WDR69   |                                                                                              |                                                                                |   |
| WDR7    | WD repeat domain 7                                                                           | TRAG                                                                           |   |
| WDR72   | WD repeat domain 72                                                                          | AI2A3                                                                          |   |
| WDR82   | WD repeat domain 82                                                                          | UNQ9542/PRO34047, MST107, MST1107, PRO2750,<br>PRO24047, SWD2, TMEM112A, WDR82 |   |
| WDYHV1  | WDYHV motif containing 1                                                                     | C8orf32                                                                        |   |
| WEE1    | WEE1 G2 checkpoint kinase                                                                    | WEE1Ahu, WEE1                                                                  |   |
| WFDC8   | WAP four-disulfide core domain 8                                                             | RP3-461P17.3, C20orf170, WAP8, dJ461P17.1                                      |   |
| WFS1    | Wolfram syndrome 1 (wolframin)                                                               | CTRCT41, WFRS, WFS, WFSL                                                       |   |
| WHAMM   | WAS protein homolog associated with actin,<br>cell membranes and microtubules                | WHDC1                                                                          |   |
| WHAMML2 | WAS protein homolog associated with actin,<br>cell membranes and microtubules                | WHAMML2; WHDC1L2                                                               |   |
| WHSC1   | Wolf-Hirschhorn syndrome candidate 1                                                         | RP11-262P20.3, MMSET, NSD2, REIIBP, TRX5, WHS                                  | √ |
| WHSC2   | Wolf-Hirschhorn syndrome candidate 2                                                         |                                                                                |   |
| WIF1    | WNT inhibitory factor 1                                                                      | UNQ191/PRO217, WIF-1                                                           | √ |
| WIPF1   | WAS/ WASL interacting protein family,<br>WD repeat domain, phosphoinositide<br>interacting 2 | PRPL-2, WASPIP, WIP                                                            |   |
| WIPF2   | WAS/ WASL interacting protein family,<br>WD repeat domain, phosphoinositide<br>interacting 2 | PP10631, WICH, WIRE                                                            |   |
| WIPI2   | WNT1 inducible signaling pathway protein 2                                                   | CGI-50, ATG18B, Atg21, WIPI-2                                                  |   |
| WISP1   | WNT1 inducible signaling pathway protein 1                                                   | CCN4c, WISP1i, WISP1tc, WISP1                                                  |   |
| WNK1    | WNK lysine deficient protein kinase 1                                                        | HSAN2, HSN2, KDP, PPP1R167, PRKWNK1, PSK, p65                                  |   |
| WNT10B  | Wingless-type (Wnt) 10B integration site<br>family member 10B                                | SHFM6, WNT-12                                                                  |   |



|         |                                                                           |                                                                    |  |
|---------|---------------------------------------------------------------------------|--------------------------------------------------------------------|--|
| WNT11   | wingless-type mfm1 v integration site                                     | HWNT11                                                             |  |
| WNT16   | wingless-type mfm1 v integration site                                     |                                                                    |  |
| WNT2B   | wingless-type mfm1 v integration site                                     | WNT13                                                              |  |
| WNT5A   | wingless-type mfm1 v integration site                                     | hWNT5A                                                             |  |
| WNT5B   | wingless-type mfm1 v integration site                                     |                                                                    |  |
| WNT7B   | wingless-type mfm1 v integration site                                     | RP11-435J19.1                                                      |  |
| WRB     | family member 7B<br>Tryptophan rich basic protein                         | CHD5                                                               |  |
| WSB1    | WD repeat and SOCS box containing 1                                       | SWIP1, WSB-1                                                       |  |
| WSB2    | WD repeat and SOCS box containing 2                                       | SBA2                                                               |  |
| WSCD1   | WSC domain containing 1                                                   |                                                                    |  |
| WSCD2   | WSC domain containing 2                                                   |                                                                    |  |
| WTAP    | Wilms tumor 1 associated protein                                          | RP1-56L9.4                                                         |  |
| WWC2    | WW and C2 domain containing 2                                             | BOMB                                                               |  |
| WWC3    | WWC family member 3                                                       | BM042                                                              |  |
| WWP1    | ww domain containing E3 ubiquitin protein<br>ligase 1                     | AIP5, Tiul1, hSDRP1                                                |  |
| XAF1    | XIAP associated factor 1                                                  | BIRC4BP, HSXIAPAF1, XIAPAF1                                        |  |
| XG      | Xg blood group                                                            | PBDX                                                               |  |
| XIAP    | X-linked inhibitor of apoptosis                                           | BT1-51501.5, AIP5, BIRC4, IAF-5, ILT1, MIMA, ALI2,<br>LIAP2, LIAP2 |  |
| XIRP2   | Xin actin-binding repeat containing 2                                     | CMYA3                                                              |  |
| XKR3    | xk, ken blood group complex subunit-<br>3                                 | XRG3, XTES                                                         |  |
| XKR8    | xk, ken blood group complex subunit-<br>8                                 | RP11-460I13.3, XRG8, hXkr8                                         |  |
| XKR9    | xk, ken blood group complex subunit-<br>9                                 | XRG9                                                               |  |
| XPNPEP2 | $\alpha$ -prolyl aminopeptidase (aminopeptidase r)<br>2                   | RP4-753P9.2, AEACEI, APP2                                          |  |
| XPNPEP3 | $\alpha$ -prolyl aminopeptidase (aminopeptidase r)<br>3 mutation          | RP11-554C12.3, APP3, NPHPL1                                        |  |
| XPO4    | Exportin 4                                                                | exp4                                                               |  |
| XPO7    | Exportin 7                                                                | EXP7, RANBP16                                                      |  |
| XPR1    | Xenotropic and polytropic retrovirus                                      |                                                                    |  |
| XRCC4   | x-ray repair complementing defective repair<br>in Chinese hamster cells 4 |                                                                    |  |
| XRN1    | 5'-3' exoribonuclease 1                                                   | 41883                                                              |  |
| XRRA1   | X-ray radiation resistance associated 1                                   |                                                                    |  |
| XYLT1   | Xylosyltransferase I                                                      | DBQD2, PXYLT1, XT-I, XT1, XTI, XYLT1                               |  |
| YAF2    | YY1 associated factor 2                                                   |                                                                    |  |
| YAP1    | Yes-associated protein 1                                                  | COB1, YAP, YAP2, YAP65, YKI                                        |  |

|        |                                                             |                                                    |   |
|--------|-------------------------------------------------------------|----------------------------------------------------|---|
| YIPF4  | Yip1 domain family, member 4                                | Nbla11189, FinGER4                                 |   |
| YIPF7  | Yip1 domain family, member 7                                | FinGER9                                            |   |
| YJEFN3 | YjeF N-terminal domain containing 3                         |                                                    |   |
| YKT6   | YKT6 v-SNARE homolog ( <i>S. cerevisiae</i> )               |                                                    |   |
| YLPM1  | YLP motif containing 1                                      | C14orf170, PPP1R169, ZAP113, ZAP3                  |   |
| YME1L1 | YME1-like 1 ATPase                                          | RP11-145E8.2, FTSH, MEG4, PAMP, YME1L              |   |
| YOD1   | YOD1 deubiquitinase                                         | RP11-164O23.1, DUBA8, OTUD2, PRO0907               |   |
| YPEL1  | Yippee-like 1 ( <i>Drosophila</i> )                         | FKSG3                                              |   |
| YPEL2  | Yippee-like 1 ( <i>Drosophila</i> )                         | FKSG4                                              |   |
| YPEL3  | Yippee-like 1 ( <i>Drosophila</i> )                         | FKSG5                                              |   |
| YPEL5  | Yippee-like 5 ( <i>Drosophila</i> )                         | CGI-127                                            |   |
| YTHDC1 | YTH domain containing 1                                     | YT521, YT521-B                                     |   |
| YTHDC2 | YTH domain containing 2                                     | CAHL                                               |   |
| YTHDF2 | YTH domain family, member 2                                 | HGRG8, NY-REN-2                                    |   |
| YTHDF3 | YTH domain family, member 3                                 |                                                    |   |
| YWHAB  | tyrosine 3-monooxygenase/tryptophan 3-                      | RP11-148E22.1, GW128, HEL-S-1, HS1, KCIP-1, YWHA A |   |
| YWHAE  | tyrosine 3-monooxygenase/tryptophan 3-                      | 14-3-3E, HEL2, KCIP-1, MDCR, MDS                   | v |
| YWHAG  | tyrosine 3-monooxygenase/tryptophan 3-                      | 14-3-3GAMMA, PPP1R170                              |   |
| YWHAQ  | tyrosine 3-monooxygenase/tryptophan 3-                      | 14-3-3, 1C5, HS1                                   |   |
| YWHAZ  | tyrosine 3-monooxygenase/tryptophan 3-                      | 14-3-3-zeta, HEL-S-3, HEL4, KCIP-1, YWHAD          |   |
| YY1    | YY1 transcription factor                                    | DELTA, INO80S, NF-E1, UCRBP, YIN-YANG-1            |   |
| ZADH2  | Zinc binding alcohol dehydrogenase domain                   |                                                    |   |
| ZAK    | sterne alpha motif and leucine zipper containing kinase AZK | HCCS4AZK, MLK7, MLT, MLTK, MRK, mlklak, pk         |   |
| ZAN    | Zonadhesin                                                  |                                                    |   |
| ZBED1  | Zinc finger, BED-type containing 1                          | ALTE, DREF, TRAMP, hDREF                           |   |
| ZBED2  | Zinc finger, BED-type containing 2                          |                                                    |   |
| ZBP1   | Z-DNA binding protein 1                                     | RP4-718J7.1, C20orf183, DAI, DLM-1, DLM1           |   |
| ZBTB10 | Zinc finger and BTB domain containing 10                    | RINZF                                              |   |
| ZBTB11 | Zinc finger and BTB domain containing 11                    | 9230110G02Rik, ZNF-U69274                          |   |
| ZBTB16 | Zinc finger and BTB domain containing 16                    | PLZF, ZNF145                                       |   |
| ZBTB2  | Zinc finger and BTB domain containing 2                     | ZNF437                                             |   |
| ZBTB24 | Zinc finger and BTB domain containing 24                    | BIF1, ICF2, PATZ2, ZNF450                          |   |
| ZBTB33 | Zinc finger and BTB domain containing 33                    | ZNF-kaiso, ZNF348                                  |   |

|         |                                          |                                                                    |  |
|---------|------------------------------------------|--------------------------------------------------------------------|--|
| ZBTB34  | Zinc finger and BTB domain containing 34 | RP11-106H5.1, ZNF918                                               |  |
| ZBTB38  | Zinc finger and BTB domain containing 38 | CIBZ, PPP1R171, ZNF921                                             |  |
| ZBTB39  | Zinc finger and BTB domain containing 39 | ZNF922                                                             |  |
| ZBTB4   | Zinc finger and BTB domain containing 4  | KAISO-L1, ZNF903                                                   |  |
| ZBTB40  | Zinc finger and BTB domain containing 40 | ZNF923                                                             |  |
| ZBTB41  | Zinc finger and BTB domain containing 41 | RP11-469L3.1, FRBZ1, ZNF924                                        |  |
| ZBTB42  | Zinc finger and BTB domain containing 42 | ZNF925                                                             |  |
| ZBTB43  | Zinc finger and BTB domain containing 43 | RP11-489N22.2, ZBTB22B, ZNF-X, ZNF297B                             |  |
| ZBTB44  | Zinc finger and BTB domain containing 44 | BTBD15, HSPC063, ZNF851                                            |  |
| ZBTB49  | Zinc finger and BTB domain containing 49 | ZNF509                                                             |  |
| ZBTB7B  | Zinc finger and BTB domain containing 7B | RP11-307C12.9, THPOK, ZBTB15, ZNF-07, ZFP07, ZNF857B, KBOY, L-KBOY |  |
| ZBTB8B  | Zinc finger and BTB domain containing 8B | RP1-27O5.1, ZNF916B                                                |  |
| ZBTB9   | Zinc finger and BTB domain containing 9  | DASS-97D12.7, ZNF919                                               |  |
| ZC3H11A | Zinc finger CCCH-type containing 11A     | ZC3HDC11A                                                          |  |
| ZC3H12B | Zinc finger CCCH-type containing 12B     | RP3-475B7.1, CXorf32, MCPIP2                                       |  |
| ZC3H12C | Zinc finger CCCH-type containing 12C     | MCPIP3                                                             |  |
| ZC3H13  | Zinc finger CCCH-type containing 13      | RP11-71J12.1, KIAA0853                                             |  |
| ZC3H6   | Zinc finger CCCH-type containing 6       | ZC3HDC6                                                            |  |
| ZC3H7B  | Zinc finger CCCH-type containing 7B      | RoXaN                                                              |  |
| ZC3HAV1 | Zinc finger CCCH-type, antiviral 1       | FKO1077, ANTD15, TEBD421, FANF15, ZAI, ZC3H2, ZC3HDC2              |  |
| ZCCHC10 | Zinc finger, CCHC domain containing 10   |                                                                    |  |
| ZCCHC11 | Zinc finger, CCHC domain containing 11   | PAPD3, TUT4                                                        |  |
| ZCCHC14 | Zinc finger, CCHC domain containing 14   | BDG-29, BDG29                                                      |  |
| ZCCHC16 | Zinc finger, CCHC domain containing 16   | Mar4, Mart4                                                        |  |
| ZCCHC18 | Zinc finger, CCHC domain containing 18   | PNMA7B, SIZN2                                                      |  |
| ZCCHC2  | Zinc finger, CCHC domain containing 2    | C18orf49                                                           |  |
| ZCCHC24 | Zinc finger, CCHC domain containing 24   | RP11-342M3.6, C10orf56, Z3CXXC8                                    |  |
| ZCCHC3  | Zinc finger, CCHC domain containing 3    | C20orf99                                                           |  |
| ZCWPW2  | Zinc finger, CW type with PWWP domain 2  | ZCW2                                                               |  |
| ZDBF2   | Zinc finger, DBF-type containing 2       |                                                                    |  |
| ZDHHC14 | Zinc finger, DHHC-type containing 14     | RP3-481C9.1, NEW1CP                                                |  |
| ZDHHC15 | Zinc finger, DHHC-type containing 15     | UNQ1969, MRX91                                                     |  |
| ZDHHC17 | Zinc finger, DHHC-type containing 17     | HSPC294, HIP14, HIP3, HYPH                                         |  |

|         |                                           |                                                  |  |
|---------|-------------------------------------------|--------------------------------------------------|--|
| ZDHHC18 | Zinc finger, DHHC-type containing 18      | RP1-50O24.3, DHHC-18, DHHC18                     |  |
| ZDHHC2  | Zinc finger, DHHC-type containing 2       | DHHC2, ZNF372                                    |  |
| ZDHHC21 | Zinc finger, DHHC-type containing 21      | 9130404H11Rik, DHHC-21, DHHC21, DNZ1, HSPC097    |  |
| ZDHHC22 | Zinc finger, DHHC-type containing 22      | hCG_1643587, C14orf59                            |  |
| ZDHHC23 | Zinc finger, DHHC-type containing 23      | NIDD                                             |  |
| ZDHHC3  | Zinc finger, DHHC-type containing 3       | HSD49, DHHC-3, GODZ, ZNF373                      |  |
| ZDHHC4  | Zinc finger, DHHC-type containing 4       | DC1, ZNF374                                      |  |
| ZDHHC7  | Zinc finger, DHHC-type containing 7       | DHHC7, SERZ-B, SERZ1, ZNF370                     |  |
| ZEB1    | Zinc finger E-box binding homeobox 1      | IKT11-47, ZNF374, ANEB0, DZF, DELTALF1, TECCO,   |  |
| ZEB2    | Zinc finger E-box binding homeobox 2      | NK1A, B24TF, H3FC0, ZNF1, ZNF1A, SMAD11,         |  |
| ZFAND2A | Zinc finger, AN1-type domain 2A           | ZNF1B<br>AIRAP                                   |  |
| ZFAND5  | Zinc finger, AN1-type domain 5            | RP11-63P12.8, ZA20D2A, ZNF216, ZFAND5            |  |
| ZFAND6  | Zinc finger, AN1-type domain 6            | HT032, AWP1, ZA20D3, ZFAND5B                     |  |
| ZFAT    | Zinc finger and AT hook domain containing | AITD31, ZNF406, ZFAT                             |  |
| ZFATAS  |                                           |                                                  |  |
| ZFC3H1  | Zinc finger, C3H1-type containing         | CCDC131, PSRC2                                   |  |
| ZFHX3   | Zinc finger homeobox 3                    | ATBF1, ATBT, ZNF927                              |  |
| ZFHX4   | Zinc finger homeobox 4                    | ZFH4, ZHF4                                       |  |
| ZFP1    | ZFP1 zinc finger protein                  | ZNF475                                           |  |
| ZFP106  |                                           |                                                  |  |
| ZFP112  |                                           |                                                  |  |
| ZFP14   | ZFP14 zinc finger protein                 | ZNF531                                           |  |
| ZFP161  |                                           |                                                  |  |
| ZFP2    | ZFP2 zinc finger protein                  | ZNF751                                           |  |
| ZFP28   | ZFP28 zinc finger protein                 | mkr5                                             |  |
| ZFP30   | ZFP30 zinc finger protein                 | ZNF745                                           |  |
| ZFP36L1 | ZFP36 ring finger protein-like 1          | BRF1, Berg36, ERF-1, ERF1, RNF162B, TIS11B, cMG1 |  |
| ZFP36L2 | ZFP36 ring finger protein-like 2          | BRF2, ERF-2, ERF2, RNF162C, TIS11D               |  |
| ZFP62   | ZFP62 zinc finger protein                 | ZET, ZNF755                                      |  |
| ZFP82   | ZFP82 zinc finger protein                 | ZNF545                                           |  |
| ZFP90   | ZFP90 zinc finger protein                 | FIK, NK10, ZNF756                                |  |
| ZFP91   | ZFP91 zinc finger protein                 | FKSG11, DMS-8, DSM-8, PZF, ZFP-91, ZNF757        |  |
| ZFR     | Zinc finger RNA binding protein           | SPG711, ZFR                                      |  |

|          |                                                |                                                                                                                                                          |  |
|----------|------------------------------------------------|----------------------------------------------------------------------------------------------------------------------------------------------------------|--|
| ZFR2     | Zinc finger RNA binding protein 2              | KIAA1086                                                                                                                                                 |  |
| ZFX      | Zinc finger protein, X-linked                  | ZNF926                                                                                                                                                   |  |
| ZFY      | Zinc finger protein, Y-linked                  | ZNF911                                                                                                                                                   |  |
| ZFYVE16  | Zinc finger, FYVE domain containing 16         | PPP1R69                                                                                                                                                  |  |
| ZFYVE20  | Zinc finger, FYVE domain containing 20         | Rabenosyn-5                                                                                                                                              |  |
| ZFYVE26  | Zinc finger, FYVE domain containing 26         | FYVE-CENT, SPG15                                                                                                                                         |  |
| ZFYVE27  | Zinc finger, FYVE domain containing 27         | RP11-459F3.2, PROTRUDIN, SPG33                                                                                                                           |  |
| ZFYVE28  | Zinc finger, FYVE domain containing 28         | LST2, LYST2                                                                                                                                              |  |
| ZIC2     | Zic family member 2                            | HPE5                                                                                                                                                     |  |
| ZIC3     | Zic family member 3                            | RP1-137H15.3, HTX, HTX1, VACTERLX, ZNF203                                                                                                                |  |
| ZIC4     | Zic family member 4                            |                                                                                                                                                          |  |
| ZIC5     | Zic family member 5                            |                                                                                                                                                          |  |
| ZIK1     | Zinc finger protein interacting with K protein | ZNF762                                                                                                                                                   |  |
| ZKSCAN1  | Zinc finger with KRAB and SCAN domains         | ZNF304, ZNF305, ZNF306, ZNF307, ZNF308, ZNF309, ZNF310, ZNF311, ZNF312, ZNF313, ZNF314, ZNF315, ZNF316, ZNF317, ZNF318, ZNF319, ZNF320, ZNF321, ZNF322   |  |
| ZKSCAN2  | Zinc finger with KRAB and SCAN domains         | ZNF694, ZSCAN31, ZSCAN34                                                                                                                                 |  |
| ZKSCAN3  | Zinc finger with KRAB and SCAN domains         | ZNF47, ZNF300, ZNF300, ZNF309, ZSCAN15, ZSCAN35, ZNF47, ZNF300, ZNF300, ZNF309, ZSCAN15, ZSCAN35, ZNF47, ZNF300, ZNF300, ZNF309, ZSCAN15, ZSCAN35, ZNF47 |  |
| ZMAT4    | Zinc finger, matrin-type 4                     |                                                                                                                                                          |  |
| ZMIZ1    | Zinc finger, MIZ-type containing 1             | RP11-519K18.1, MIZ, KAT17, TRAF110, ZIMP10, ZMIZ1                                                                                                        |  |
| ZMIZ2    | Zinc finger, MIZ-type containing 2             | HRIHFB2007, NET27, TRAFIP20, ZIMP7, hZIMP7                                                                                                               |  |
| ZMPSTE24 | Zinc metallopeptidase STE24                    | FACE-1, FACE1, HGPS, PRO1, STE24, Ste24p                                                                                                                 |  |
| ZMYM1    | Zinc finger, MYM-type 1                        | RP11-181E22.4, MYM                                                                                                                                       |  |
| ZMYM2    | Zinc finger, MYM-type 2                        | RP11-264J4.7, FIM, MYM, RAMP, SCLL, ZNF198                                                                                                               |  |
| ZMYM4    | Zinc finger, MYM-type 4                        | RP11-181E22.3, CDIR, MYM, ZNF198L3, ZNF262                                                                                                               |  |
| ZMYM5    | Zinc finger, MYM-type 5                        | RP11-523H24.6, HSPC050, MYM, ZNF198L1, ZNF237                                                                                                            |  |
| ZMYM6    | Zinc finger, MYM-type 6                        | RP11-244H15.3, DUSC12, MYM, ZBED7, ZNF198L4, ZNF259                                                                                                      |  |
| ZMYND11  | Zinc finger, MYND-type containing 11           | RP11-486H9.1, BRAM1, BS69                                                                                                                                |  |
| ZMYND8   | Zinc finger, MYND-type containing 8            | RP5-890O15.1, PRKCBP1, PRO2893, RACK7                                                                                                                    |  |
| ZNF10    | Zinc finger protein 10                         | KOX1                                                                                                                                                     |  |
| ZNF100   | Zinc finger protein 100                        |                                                                                                                                                          |  |
| ZNF107   | Zinc finger protein 107                        | Y8; ZFD25; ZNF588; smap-7                                                                                                                                |  |
| ZNF117   | Zinc finger protein 117                        | HPF9; H-plk                                                                                                                                              |  |
| ZNF12    | Zinc finger protein 12                         | KOX3; HZF11; GIOT-3; ZNF325                                                                                                                              |  |
| ZNF121   | Zinc finger protein 121                        | ZHC32; ZNF20; D19S204                                                                                                                                    |  |

|         |                                     |                                                       |  |
|---------|-------------------------------------|-------------------------------------------------------|--|
| ZNF124  | Zinc finger protein 124             | ZK7; HZF16; HZF-16                                    |  |
| ZNF131  | Zinc finger protein 131             | ZBTB35; pHZ-10                                        |  |
| ZNF133  | Zinc finger protein 133             | ZNF150; pHZ-13; pHZ-66                                |  |
| ZNF136  | Zinc finger protein 136             | pHZ-20                                                |  |
| ZNF137  | Zinc finger protein 137, pseudogene | ZNF137; pHZ-30                                        |  |
| ZNF138  | Zinc finger protein 138             | pHZ-32                                                |  |
| ZNF140  | Zinc finger protein 140             | pHZ-39                                                |  |
| ZNF141  | Zinc finger protein 141             | D4S90; PAPA6; pHZ-44                                  |  |
| ZNF148  | Zinc finger protein 148             | BERF-1; BFCOL1; ZBP-89; ZFP148; pHZ-52; HT-BETA       |  |
| ZNF154  | Zinc finger protein 154             | pHZ-92                                                |  |
| ZNF160  | Zinc finger protein 160             | F11; HZF5; KR18; HKr18                                |  |
| ZNF167  | Zinc finger protein 167             | ZFP; FLJ12738                                         |  |
| ZNF17   | Zinc finger protein 17              | HPF3; KOX10                                           |  |
| ZNF175  | Zinc finger protein 175             | OTK18                                                 |  |
| ZNF180  | Zinc finger protein 180             | HHZ168                                                |  |
| ZNF181  | Zinc finger protein 181             | HHZ181                                                |  |
| ZNF182  | Zinc finger protein 182             | KOX14; ZNF21; HHZ150; Zfp182                          |  |
| ZNF184  | Zinc finger protein 184             |                                                       |  |
| ZNF187  | Zinc finger protein 187             |                                                       |  |
| ZNF19   | Zinc finger protein 19              | KOX12                                                 |  |
| ZNF192  | zinc finger protein 192             |                                                       |  |
| ZNF197  | Zinc finger protein 197             | F16; VILAK; ZNF20; ZNF100; ZKSCAN9; ZSCAN41; D2S1262E |  |
| ZNF200  | Zinc finger protein 200             |                                                       |  |
| ZNF204P | Zinc finger protein 204, pseudogene | ZNF204; ZNF315P; b24o18.1; ZNF184-Lp                  |  |
| ZNF207  | Zinc finger protein 207             | BuGZ                                                  |  |
| ZNF208  | Zinc finger protein 208             | PMIDP; ZNF95                                          |  |
| ZNF212  | Zinc finger protein 212             | ZNF182; ZNFC150; C2H2-150                             |  |
| ZNF217  | Zinc finger protein 217             | ZABC1                                                 |  |
| ZNF223  | Zinc finger protein 223             |                                                       |  |
| ZNF226  | Zinc finger protein 226             |                                                       |  |
| ZNF229  | Zinc finger protein 229             |                                                       |  |
| ZNF230  | Zinc finger protein 230             | FDZF2                                                 |  |
| ZNF234  | Zinc finger protein 234             | HZF4; ZNF269                                          |  |

|         |                          |                                               |  |
|---------|--------------------------|-----------------------------------------------|--|
| ZNF236  | Zinc finger protein 236  | ZNF236A; ZNF236B                              |  |
| ZNF238  | Zinc finger protein 238  |                                               |  |
| ZNF24   | Zinc finger protein 24   | KOX17; RSG-A; ZNF191; ZSCAN3; Zfp191          |  |
| ZNF248  | Zinc finger protein 248  | bA162G10.3                                    |  |
| ZNF25   | Zinc finger protein 25   | Zfp9; KOX19                                   |  |
| ZNF250  | Zinc finger protein 250  | ZFP647; ZNF647                                |  |
| ZNF252  | Zinc finger protein 252  | BC3; ZNF347                                   |  |
| ZNF253  | Zinc finger protein 253  | BMZF1; BMZF-1; ZNF411                         |  |
| ZNF254  | Zinc finger protein 254  | BMZF-5; ZNF539; ZNF91L; HD-ZNF1               |  |
| ZNF257  | Zinc finger protein 257  | BMZF4; BMZF-4                                 |  |
| ZNF26   | Zinc finger protein 26   | KOX20; HEL-179                                |  |
| ZNF260  | Zinc finger protein 260  | PEX1; OZRF1; ZFP260                           |  |
| ZNF263  | Zinc finger protein 263  | FPM315; ZSCAN44; ZKSCAN12                     |  |
| ZNF264  | Zinc finger protein 264  |                                               |  |
| ZNF266  | Zinc finger protein 266  | HZF1                                          |  |
| ZNF267  | Zinc finger protein 267  | HZF2                                          |  |
| ZNF268  | Zinc finger protein 268  | HZF3                                          |  |
| ZNF271  | Zinc finger protein 271  | HZF7; ZNFEB                                   |  |
| ZNF273  | Zinc finger protein 273  | HZF9                                          |  |
| ZNF274  | Zinc finger protein 274  | ZF2; HFB101; ZSCAN51; ZKSCAN19                |  |
| ZNF276  | Zinc finger protein 276  | ZADT; CENPZ; CENP-Z; ZFP276; ZNF477           |  |
| ZNF277  | Zinc finger protein 277  | NRIF4; ZNF277P                                |  |
| ZNF28   | Zinc finger protein 28   | KOX24                                         |  |
| ZNF280B | Zinc finger protein 280B | SUHW2; ZNF279; ZNF632; 5'OY11.1; D87009.C22.3 |  |
| ZNF280D | Zinc finger protein 280D | SUHW4; ZNF634                                 |  |
| ZNF281  | Zinc finger protein 281  | ZBP-99; ZNP-99                                |  |
| ZNF283  | Zinc finger protein 283  | HZF19; HZF41                                  |  |
| ZNF284  | Zinc finger protein 284  | ZNF284L                                       |  |
| ZNF286A | Zinc finger protein 286A | ZNF286                                        |  |
| ZNF286B | Zinc finger protein 286B | ZNF590; ZNF286C; ZNF286L                      |  |
| ZNF287  | Zinc finger protein 287  | ZSCAN45; ZKSCAN13                             |  |
| ZNF292  | Zinc finger protein 292  | ZN-16; Zn-15; ZFP292; Nbla00365; bA393I2.3    |  |
| ZNF295  | Zinc finger protein 295  |                                               |  |

|          |                                           |                                                      |  |
|----------|-------------------------------------------|------------------------------------------------------|--|
| ZNF302   | Zinc finger protein 302                   | HSD10, MST1154, ZNF327, MST1154, ZNF155L, ZNF140L    |  |
| ZNF317   | Zinc finger protein 317                   |                                                      |  |
| ZNF319   | Zinc finger protein 319                   | ZFP319                                               |  |
| ZNF320   | Zinc finger protein 320                   | ZFPL                                                 |  |
| ZNF321   | Zinc finger protein 321                   |                                                      |  |
| ZNF323   | Zinc finger protein 323                   |                                                      |  |
| ZNF326   | Zinc finger protein 326                   | ZIRD; ZAN75; Zfp326; dJ871E2.1                       |  |
| ZNF329   | Zinc finger protein 329                   |                                                      |  |
| ZNF333   | Zinc finger protein 333                   |                                                      |  |
| ZNF337   | Zinc finger protein 337                   |                                                      |  |
| ZNF33A   | Zinc finger protein 33A                   | KOX2, KOX3, KOX31, NFTA, ZNF11, ZNF33, ZZADK, ZNF11A |  |
| ZNF33B   | Zinc finger protein 33B                   | KOX2; KOX31; ZNF11B                                  |  |
| ZNF341   | Zinc finger protein 341                   |                                                      |  |
| ZNF345   | Zinc finger protein 345                   | HZF10                                                |  |
| ZNF35    | Zinc finger protein 35                    | HF10; HF.10; Zfp105                                  |  |
| ZNF350   | Zinc finger protein 350                   | ZFQR; ZBRK1                                          |  |
| ZNF367   | Zinc finger protein 367                   | AFF29; ZFF29; CDC14B                                 |  |
| ZNF37A   | Zinc finger protein 37A                   | KOX21; ZNF37                                         |  |
| ZNF382   | Zinc finger protein 382                   | KS1                                                  |  |
| ZNF385B  | Zinc finger protein 385B                  | ZNF533                                               |  |
| ZNF395   | Zinc finger protein 395                   | FBI, FNF1, HDBF-2, FNF-1, HDBF-2, HDBF-2, SIF-0-14   |  |
| ZNF396   | Zinc finger protein 396                   | ZSCAN14                                              |  |
| ZNF397   | Zinc finger protein 397                   | ZNF47; ZSCAN15                                       |  |
| ZNF397OS | Zinc finger and SCAN domain containing 30 | ZNF917; ZNF-WYM; ZNF397OS                            |  |
| ZNF398   | Zinc finger protein 398                   | P51; P71; ZER6                                       |  |
| ZNF410   | Zinc finger protein 410                   | APA1; APA-1                                          |  |
| ZNF416   | Zinc finger protein 416                   |                                                      |  |
| ZNF417   | Zinc finger protein 417                   |                                                      |  |
| ZNF418   | Zinc finger protein 418                   |                                                      |  |
| ZNF419   | Zinc finger protein 419                   | ZNF419A                                              |  |
| ZNF420   | Zinc finger protein 420                   | APAK                                                 |  |
| ZNF425   | Zinc finger protein 425                   |                                                      |  |
| ZNF43    | Zinc finger protein 43                    | HTF6; KOX27; ZNF39L1                                 |  |



|         |                          |                                         |  |
|---------|--------------------------|-----------------------------------------|--|
| ZNF430  | Zinc finger protein 430  |                                         |  |
| ZNF436  | Zinc finger protein 436  | ZNF; Zfp46                              |  |
| ZNF439  | Zinc finger protein 439  |                                         |  |
| ZNF44   | Zinc finger protein 44   | ZNF; KOX7; ZNF55; ZNF58; GIOT-2; ZNF504 |  |
| ZNF440  | Zinc finger protein 440  |                                         |  |
| ZNF441  | Zinc finger protein 441  |                                         |  |
| ZNF443  | Zinc finger protein 443  | ZK1                                     |  |
| ZNF449  | Zinc finger protein 449  | ZSCAN19                                 |  |
| ZNF454  | Zinc finger protein 454  |                                         |  |
| ZNF461  | Zinc finger protein 461  | GIOT1; GIOT-1                           |  |
| ZNF468  | Zinc finger protein 468  |                                         |  |
| ZNF469  | Zinc finger protein 469  | BCS; BCS1                               |  |
| ZNF470  | Zinc finger protein 470  | CZF-1                                   |  |
| ZNF471  | Zinc finger protein 471  | ERP1; Z1971                             |  |
| ZNF479  | Zinc finger protein 479  | KR19                                    |  |
| ZNF480  | Zinc finger protein 480  |                                         |  |
| ZNF483  | Zinc finger protein 483  | ZSCAN48; ZKSCAN16                       |  |
| ZNF487  | Zinc finger protein 487  | KRBO1; ZNF487P                          |  |
| ZNF490  | Zinc finger protein 490  |                                         |  |
| ZNF491  | Zinc finger protein 491  |                                         |  |
| ZNF492  | Zinc finger protein 492  | ZNF115                                  |  |
| ZNF493  | Zinc finger protein 493  |                                         |  |
| ZNF498  | Zinc finger protein 498  |                                         |  |
| ZNF500  | Zinc finger protein 500  |                                         |  |
| ZNF501  | Zinc finger protein 501  | ZNF; ZNF52                              |  |
| ZNF502  | Zinc finger protein 502  |                                         |  |
| ZNF506  | Zinc finger protein 506  |                                         |  |
| ZNF507  | Zinc finger protein 507  |                                         |  |
| ZNF510  | Zinc finger protein 510  |                                         |  |
| ZNF511  | Zinc finger protein 511  |                                         |  |
| ZNF512  | Zinc finger protein 512  |                                         |  |
| ZNF512B | Zinc finger protein 512B | GM632                                   |  |
| ZNF514  | Zinc finger protein 514  |                                         |  |

|         |                                     |            |   |
|---------|-------------------------------------|------------|---|
| ZNF516  | Zinc finger protein 516             | HsT287     |   |
| ZNF518B | Zinc finger protein 518B            |            |   |
| ZNF519  | Zinc finger protein 51              | HsT2362    |   |
| ZNF521  | Zinc finger protein 521             | EHZF; Evi3 | v |
| ZNF525  | Zinc finger protein 525             |            |   |
| ZNF527  | Zinc finger protein 527             |            |   |
| ZNF528  | Zinc finger protein 528             |            |   |
| ZNF529  | Zinc finger protein 529             |            |   |
| ZNF530  | Zinc finger protein 530             |            |   |
| ZNF536  | Zinc finger protein 536             |            |   |
| ZNF540  | Zinc finger protein 540             | Nbla10512  |   |
| ZNF542  | Zinc finger protein 542, pseudogene | ZNF542     |   |
| ZNF543  | Znc finger protein 543              |            |   |
| ZNF544  | Znc finger protein 544              |            |   |
| ZNF547  | Zinc finger protein 547             |            |   |
| ZNF549  | Zinc finger protein 549             |            |   |
| ZNF550  | Zinc finger protein 550             |            |   |
| ZNF551  | Zinc finger protein 551             |            |   |
| ZNF555  | Zinc finger protein 555             |            |   |
| ZNF557  | Zinc finger protein 557             |            |   |
| ZNF558  | Zinc finger protein 558             |            |   |
| ZNF559  | Zinc finger protein 559             | NBLA00121  |   |
| ZNF560  | Zinc finger protein 560             |            |   |
| ZNF562  | Zinc finger protein 562             |            |   |
| ZNF563  | Zinc finger protein 563             |            |   |
| ZNF564  | Zinc finger protein 564             |            |   |
| ZNF566  | Zinc finger protein 566             |            |   |
| ZNF568  | Zinc finger protein 568             |            |   |
| ZNF569  | Zinc finger protein 569             | ZNF; ZAP1  |   |
| ZNF571  | Zinc finger protein 571             | HSPC059    |   |
| ZNF572  | Zinc finger protein 572             |            |   |
| ZNF573  | Zinc finger protein 573             |            |   |
| ZNF575  | Zinc finger protein 575             |            |   |

|         |                          |                                          |  |
|---------|--------------------------|------------------------------------------|--|
| ZNF577  | Zinc finger protein 577  |                                          |  |
| ZNF582  | Zinc finger protein 582  |                                          |  |
| ZNF584  | Zinc finger protein 584  |                                          |  |
| ZNF585A | Zinc finger protein 585A |                                          |  |
| ZNF585B | Zinc finger protein 585B | SZFP41                                   |  |
| ZNF586  | Zinc finger protein 586  |                                          |  |
| ZNF587  | Zinc finger protein 587  | ZF6                                      |  |
| ZNF589  | Zinc finger protein 589  | SZF1                                     |  |
| ZNF592  | Zinc finger protein 592  | CAMOS; SCAR5                             |  |
| ZNF594  | Zinc finger protein 594  |                                          |  |
| ZNF595  | Zinc finger protein 595  |                                          |  |
| ZNF596  | Zinc finger protein 596  |                                          |  |
| ZNF598  | Zinc finger protein 598  |                                          |  |
| ZNF605  | Zinc finger protein 605  |                                          |  |
| ZNF606  | Zinc finger protein 606  | ZNF328                                   |  |
| ZNF607  | Zinc finger protein 607  |                                          |  |
| ZNF608  | Zinc finger protein 608  | NY-REN-36                                |  |
| ZNF609  | Zinc finger protein 609  |                                          |  |
| ZNF610  | Zinc finger protein 610  |                                          |  |
| ZNF615  | Zinc finger protein 615  |                                          |  |
| ZNF618  | Zinc finger protein 618  | NEDD10; FP13169                          |  |
| ZNF621  | Zinc finger protein 621  |                                          |  |
| ZNF623  | Zinc finger protein 623  |                                          |  |
| ZNF624  | Zinc finger protein 624  |                                          |  |
| ZNF626  | Zinc finger protein 626  |                                          |  |
| ZNF638  | Zinc finger protein 638  | ZFML; NP220; Zfp638                      |  |
| ZNF639  | Zinc finger protein 639  | ZASC1; ANC-2H01; ANC_2H01; 6230400O18Rik |  |
| ZNF644  | Zinc finger protein 644  | NatF; MYP21; ZEP-2; BM-005               |  |
| ZNF649  | Zinc finger protein 649  |                                          |  |
| ZNF652  | Zinc finger protein 652  |                                          |  |
| ZNF654  | Zinc finger protein 654  |                                          |  |
| ZNF655  | Zinc finger protein 655  | VIK; VIK-1                               |  |
| ZNF664  | Zinc finger protein 664  | ZFOC1; ZNF176                            |  |

|         |                                     |                      |  |
|---------|-------------------------------------|----------------------|--|
| ZNF665  | Zinc finger protein 665             | ZFP160L              |  |
| ZNF667  | Zinc finger protein 667             | MIPU1                |  |
| ZNF670  | Zinc finger protein 670             |                      |  |
| ZNF673  | Zinc finger family member 673       |                      |  |
| ZNF674  | Zinc finger protein 674             | MRX92; ZNF673B       |  |
| ZNF675  | Zinc finger protein 675             | TIZ; TBZF            |  |
| ZNF676  | Zinc finger protein 676             |                      |  |
| ZNF677  | Zinc finger protein 677             |                      |  |
| ZNF678  | Zinc finger protein 678             |                      |  |
| ZNF680  | Zinc finger protein 680             |                      |  |
| ZNF681  | Zinc finger protein 681             |                      |  |
| ZNF682  | Zinc finger protein 682             | BC39498_3            |  |
| ZNF697  | Zinc finger protein 697             |                      |  |
| ZNF699  | Zinc finger protein 699             | hang                 |  |
| ZNF700  | Zinc finger protein 700             |                      |  |
| ZNF701  | Zinc finger protein 701             |                      |  |
| ZNF704  | Zinc finger protein 704             | Gig1                 |  |
| ZNF705A | Zinc finger protein 705A            |                      |  |
| ZNF705D | Zinc finger protein 705D            | ZNF705C              |  |
| ZNF708  | Zinc finger protein 708             | KOX8; ZNF15; ZNF15L1 |  |
| ZNF709  | Zinc finger protein 709             |                      |  |
| ZNF71   | Zinc finger protein 71              | EZFIT                |  |
| ZNF714  | Zinc finger protein 714             |                      |  |
| ZNF716  | Zinc finger protein 716             |                      |  |
| ZNF718  | Zinc finger protein 718             |                      |  |
| ZNF720  | Zinc finger protein 720             |                      |  |
| ZNF721  | Zinc finger protein 721             |                      |  |
| ZNF724P | Zinc finger protein 724, pseudogene |                      |  |
| ZNF726  | Zinc finger protein 726             |                      |  |
| ZNF730  | Zinc finger protein 730             |                      |  |
| ZNF732  | Zinc finger protein 732             |                      |  |
| ZNF737  | Zinc finger protein 737             | ZNF102               |  |
| ZNF738  | Zinc finger protein 738             |                      |  |

|         |                                     |                                       |  |
|---------|-------------------------------------|---------------------------------------|--|
| ZNF74   | Zinc finger protein 74              | COS52; hZNF7; ZFP520; ZNF520          |  |
| ZNF747  | Zinc finger protein 747             |                                       |  |
| ZNF750  | Zinc finger protein 750             | ZFP750                                |  |
| ZNF75D  | Zinc finger protein 75D             | D8C6; ZNF75; ZNF82; ZSCAN28; ZKSCAN24 |  |
| ZNF76   | zinc finger protein 76              | ZNF523; Zfp523; D6S229E               |  |
| ZNF761  | Zinc finger protein 761             | ZNF468                                |  |
| ZNF763  | Zinc finger protein 763             | ZNF; ZNF440L                          |  |
| ZNF765  | Zinc finger protein 765             |                                       |  |
| ZNF766  | Zinc finger protein 766             |                                       |  |
| ZNF770  | Zinc finger protein 770             | PRO1914                               |  |
| ZNF776  | Zinc finger protein 776             |                                       |  |
| ZNF778  | Zinc finger protein 778             |                                       |  |
| ZNF780A | Zinc finger protein 780A            | ZNF780                                |  |
| ZNF780B | Zinc finger protein 780B            | ZNF779                                |  |
| ZNF781  | Zinc finger protein 781             |                                       |  |
| ZNF783  | Zinc finger family member 783       |                                       |  |
| ZNF788  | Zinc finger family member 788       |                                       |  |
| ZNF790  | Zinc finger protein 790             |                                       |  |
| ZNF792  | Zinc finger protein 792             |                                       |  |
| ZNF793  | Zinc finger protein 793             |                                       |  |
| ZNF799  | Zinc finger protein 799             | HIT-40; ZNF842                        |  |
| ZNF80   | Zinc finger protein 80              | pT17                                  |  |
| ZNF800  | Zinc finger protein 800             |                                       |  |
| ZNF805  | Zinc finger protein 805             |                                       |  |
| ZNF806  | Zinc finger protein 806             |                                       |  |
| ZNF808  | Zinc finger protein 808             |                                       |  |
| ZNF81   | Zinc finger protein 81              | HFZ20; MRX45; dJ54B20.6               |  |
| ZNF814  | Zinc finger protein 814             |                                       |  |
| ZNF815  | Zinc finger protein 815, pseudogene | ZNF815                                |  |
| ZNF823  | Zinc finger protein 823             | HSZFP36                               |  |
| ZNF826  | Zinc finger protein 826, pseudogene | ZNF826                                |  |
| ZNF83   | Zinc finger protein 83              | HPF1; ZNF816B                         |  |
| ZNF830  | Zinc finger protein 830             | OMCG1; CCDC16                         |  |

|           |                                                        |                                                              |  |
|-----------|--------------------------------------------------------|--------------------------------------------------------------|--|
| ZNF831    | Zinc finger protein 831                                | C20orf174; dJ492J12.1                                        |  |
| ZNF833    | Zinc finger protein 833, pseudogene                    | ZNF833                                                       |  |
| ZNF84     | Zinc finger protein 84                                 | HPF2                                                         |  |
| ZNF844    | Zinc finger protein 844                                |                                                              |  |
| ZNF845    | Zinc finger protein 845                                |                                                              |  |
| ZNF85     | Zinc finger protein 85                                 | HPF4; HTF1                                                   |  |
| ZNF862    | Zinc finger protein 862                                |                                                              |  |
| ZNF876P   | Zinc finger protein 876, pseudogene                    |                                                              |  |
| ZNF879    | Zinc finger protein 879                                | DKFZp686E2433                                                |  |
| ZNF90     | Zinc finger protein 90                                 | HTF9                                                         |  |
| ZNF91     | Zinc finger protein 91                                 | HPF7; HTF10                                                  |  |
| ZNF92     | Zinc finger protein 92                                 | TF12; HPF12; HTF12; HEL-203                                  |  |
| ZNF93     | Zinc finger protein 93                                 | TF34; HPF34; HTF34; ZNF505                                   |  |
| ZNF98     | Zinc finger protein 98                                 | F7175; ZNF739                                                |  |
| ZNHIT1    | Zinc finger, HIT-type containing 1                     | CG1I; ZNFN4A1                                                |  |
| ZNRD1     | Zinc ribbon domain containing 1                        | TEX6; ZR14; Rpa12; hZR14; HTEX-6; tctex-6                    |  |
| ZNRF2     | Zinc and ring finger 2                                 | zinc and ring finger 2                                       |  |
| ZNRF3     | Zinc and ring finger 3                                 | RNF203; BK747E2.3                                            |  |
| ZNRF4     | Zinc and ring finger 4                                 | spzn; RNF204; Ssrzf1; SPERIZIN                               |  |
| ZRANB1    | Zinc finger, RAN-binding domain containing 1           | RP11-298J20.4, TRABID                                        |  |
| ZRANB2    | Zinc finger, RAN-binding domain containing 2           | ZIS; ZIS1; ZIS2; ZNF265                                      |  |
| ZRANB3    | Zinc finger, RAN-binding domain containing 3           | AH2; 4933425L19Rik                                           |  |
| ZSCAN10   | Zinc finger and SCAN domain containing 10              | Zfp206; Znf206; BC068284; Zkscan10                           |  |
| ZSCAN12   | Zinc finger and SCAN domain containing 12              | Zfp96; FPM315; mKIAA0426; 2510038J07Rik                      |  |
| ZSCAN12P1 | Zinc finger and SCAN domain containing 12 pseudogene 1 | ZNF306L1; ZNF306P1; ZNF187P1; ZNF305P1, ZSCAN12L1; dJ212J6.7 |  |
| ZSCAN18   | Zinc finger and SCAN domain containing 18              | ZNF447                                                       |  |
| ZSCAN20   | Zinc finger and SCAN domain containing 20              | KOX29; ZNF31; ZFP-31; ZNF360                                 |  |
| ZSCAN22   | Zinc finger and SCAN domain containing 22              | HKR2; ZNF50                                                  |  |
| ZSCAN23   | Zinc finger and SCAN domain containing 23              | ZNF390; ZNF453                                               |  |
| ZSWIM1    | Zinc finger SWIM-type containing 1                     | AI850991                                                     |  |
| ZSWIM2    | Zinc finger, SWIM-type containing 2                    | MEX                                                          |  |
| ZSWIM5    | Zinc finger, SWIM-type containing 5                    | AI503093                                                     |  |
| ZSWIM7    | Zinc finger, SWIM-type containing 7                    | SWS1                                                         |  |

|        |                                              |         |  |
|--------|----------------------------------------------|---------|--|
| ZWILCH | Zwilch kinetochore protein                   | KNTC1AP |  |
| ZWINT  | ZW10 interacting kinetochore protein         | ZWINT1  |  |
| ZXDB   | Zinc finger, X-linked, duplicated B          | ZNF905  |  |
| ZXDC   | ZXD family zinc finger C                     | ZXDL    |  |
| ZYG11B | Zyg-11 family member B, cell cycle regulator | ZYG11   |  |
| ZZEF1  | Zinc finger, ZZ-type with EF-hand domain 1   | ZZZA    |  |
| ZZZ3   | Zinc finger, ZZ-type containing 3            | ATAC1   |  |

**Supplementary Table 5. Predicted targets of hsa-miR-181a-5p by miRDB.**

| <b>Gene symbol</b> | <b>Full name</b>                                                         | <b>Target score</b> | <b>Cancer-related gene</b> |
|--------------------|--------------------------------------------------------------------------|---------------------|----------------------------|
| <b>AAK1</b>        | AP2 associated kinase 1                                                  | 67                  |                            |
| <b>AASDHPPT</b>    | Amino adipate-semialdehyde dehydrogenase-phosphopantetheinyl transferase | 69                  |                            |
| <b>ABHD13</b>      | Abhydrolase domain containing 13                                         | 64                  |                            |
| <b>ABI1</b>        | Abl-interactor 1                                                         | 53                  | v                          |
| <b>ABI3BP</b>      | ABI family, member 3 (NESH) binding protein                              | 78                  |                            |
| <b>ACP1</b>        | Acid phosphatase 1, soluble                                              | 66                  |                            |
| <b>ACSL1</b>       | Acyl-CoA synthetase long-chain family member 1                           | 74                  |                            |
| <b>ACSM2B</b>      | Acyl-CoA synthetase medium-chain family member 2B                        | 61                  |                            |
| <b>ACVR2A</b>      | Activin A receptor, type IIA                                             | 90                  |                            |
| <b>ACVR2B</b>      | Activin A receptor, type IIB                                             | 96                  |                            |
| <b>ACYP1</b>       | Acylphosphatase 1, erythrocyte (common) type                             | 70                  |                            |
| <b>ADAM11</b>      | ADAM metallopeptidase domain 11                                          | 62                  |                            |
| <b>ADAM28</b>      | ADAM metallopeptidase domain 28                                          | 72                  |                            |
| <b>ADAMTS18</b>    | ADAM metallopeptidase with thrombospondin type 1 motif, 18               | 59                  |                            |
| <b>ADAMTS5</b>     | ADAM metallopeptidase with thrombospondin type 1 motif, 5                | 64                  |                            |
| <b>ADAMTSL1</b>    | ADAMTS-like 1                                                            | 71                  |                            |
| <b>ADARB1</b>      | Adenosine deaminase, RNA-specific, B1                                    | 63                  |                            |
| <b>ADARB2</b>      | Adenosine deaminase, RNA-specific, B2                                    | 51                  |                            |
| <b>ADCK3</b>       | aarF domain containing kinase 3                                          | 71                  |                            |
| <b>ADM</b>         | Adrenomedullin                                                           | 57                  |                            |
| <b>ADO</b>         | 2-Aminoethanethiol (cysteamine) dioxygenase                              | 70                  |                            |
| <b>ADRBK1</b>      | Adrenergic, beta, receptor kinase 1                                      | 79                  |                            |
| <b>AFF2</b>        | AF4/FMR2 family, member 2                                                | 60                  |                            |
| <b>AFG3L2</b>      | AFG3 ATPase family gene 3-like 2 ( <i>S. cerevisiae</i> )                | 91                  |                            |
| <b>AFTPH</b>       | Aftiphilin                                                               | 61                  |                            |
| <b>AGK</b>         | Acylglycerol kinase                                                      | 52                  |                            |
| <b>AGTR1</b>       | Angiotensin II receptor, type 1                                          | 53                  |                            |
| <b>AHCTF1</b>      | AT hook containing transcription factor 1                                | 70                  |                            |



|                 |                                                                                                   |    |  |
|-----------------|---------------------------------------------------------------------------------------------------|----|--|
| <b>AIM1L</b>    | Absent in melanoma 1-like                                                                         | 55 |  |
| <b>AKAP5</b>    | A kinase (PRKA) anchor protein 5                                                                  | 87 |  |
| <b>AKAP6</b>    | A kinase (PRKA) anchor protein 6                                                                  | 73 |  |
| <b>AKAP7</b>    | A kinase (PRKA) anchor protein 7                                                                  | 83 |  |
| <b>AKD1</b>     | Adenylate kinase domain containing 1                                                              | 61 |  |
| <b>AKT3</b>     | V-akt murine thymoma viral oncogene homolog 3 (protein kinase B, gamma)                           | 89 |  |
| <b>ALDH9A1</b>  | Aldehyde dehydrogenase 9 family, member A1                                                        | 52 |  |
| <b>ALG1</b>     | Asparagine-linked glycosylation 1, beta-1,4-mannosyltransferase homolog ( <i>S. cerevisiae</i> )  | 57 |  |
| <b>ALG11</b>    | Asparagine-linked glycosylation 11, alpha-1,2-mannosyltransferase homolog (yeast)                 | 62 |  |
| <b>ALG9</b>     | Asparagine-linked glycosylation 9, alpha-1,2-mannosyltransferase homolog ( <i>S. cerevisiae</i> ) | 63 |  |
| <b>ANAPC16</b>  | Anaphase promoting complex subunit 16                                                             | 77 |  |
| <b>ANKRD13C</b> | Ankyrin repeat domain 13C                                                                         | 98 |  |
| <b>ANKRD33B</b> | Ankyrin repeat domain 33B                                                                         | 52 |  |
| <b>ANKRD34C</b> | Ankyrin repeat domain 34C                                                                         | 51 |  |
| <b>ANKRD43</b>  | Ankyrin repeat domain 43                                                                          | 60 |  |
| <b>ANKRD44</b>  | Ankyrin repeat domain 44                                                                          | 50 |  |
| <b>ANO1</b>     | Anoctamin 1, calcium activated chloride channel                                                   | 70 |  |
| <b>ANTXR2</b>   | Anthrax toxin receptor 2                                                                          | 53 |  |
| <b>AP1G1</b>    | Adaptor-related protein complex 1, gamma 1 subunit                                                | 67 |  |
| <b>AP1S3</b>    | Adaptor-related protein complex 1, sigma 3 subunit                                                | 61 |  |
| <b>ARF6</b>     | ADP-ribosylation factor 6                                                                         | 69 |  |
| <b>ARFGEF2</b>  | ADP-ribosylation factor guanine nucleotide-exchange factor 2 (brefeldin A-inhibited)              | 68 |  |
| <b>ARHGAP26</b> | Rho GTPase activating protein 26                                                                  | 79 |  |
| <b>ARHGEF3</b>  | Rho guanine nucleotide exchange factor (GEF) 3                                                    | 97 |  |
| <b>ARHGEF38</b> | Rho guanine nucleotide exchange factor (GEF) 38                                                   | 56 |  |
| <b>ARHGEF7</b>  | Rho guanine nucleotide exchange factor (GEF) 7                                                    | 50 |  |
| <b>ARL2BP</b>   | ADP-ribosylation factor-like 2 binding protein                                                    | 51 |  |
| <b>ARL5A</b>    | ADP-ribosylation factor-like 5A                                                                   | 68 |  |
| <b>ARL5B</b>    | ADP-ribosylation factor-like 5B                                                                   | 58 |  |
| <b>ARL6IP5</b>  | ADP-ribosylation-like factor 6 interacting protein 5                                              | 61 |  |
| <b>ARMC8</b>    | Armadillo repeat containing 8                                                                     | 60 |  |
| <b>ARPC1A</b>   | Actin related protein 2/3 complex, subunit 1A, 41 kDa                                             | 55 |  |
| <b>ARRDC4</b>   | Arrestin domain containing 4                                                                      | 61 |  |

|                 |                                                                                 |    |   |
|-----------------|---------------------------------------------------------------------------------|----|---|
| <b>ARSJ</b>     | Arylsulfatase family, member J                                                  | 87 |   |
| <b>ATF1</b>     | Activating transcription factor 1                                               | 76 | v |
| <b>ATG5</b>     | ATG5 autophagy related 5 homolog ( <i>S. cerevisiae</i> )                       | 73 |   |
| <b>ATM</b>      | Ataxia telangiectasia mutated                                                   | 91 | v |
| <b>ATP11C</b>   | ATPase, class VI, type 11C                                                      | 83 |   |
| <b>ATP1B1</b>   | ATPase, Na <sup>+</sup> /K <sup>+</sup> transporting, beta 1 polypeptide        | 56 |   |
| <b>ATP1B2</b>   | ATPase, Na <sup>+</sup> /K <sup>+</sup> transporting, $\beta$ 2 polypeptide     | 50 |   |
| <b>ATP2A2</b>   | ATPase, Ca <sup>++</sup> transporting, cardiac muscle, slow twitch 2            | 88 |   |
| <b>ATP2B1</b>   | ATPase, Ca <sup>++</sup> transporting, plasma membrane 1                        | 91 |   |
| <b>ATP2B2</b>   | ATPase, Ca <sup>++</sup> transporting, plasma membrane 2                        | 62 |   |
| <b>ATP6V1C2</b> | ATPase, H <sup>+</sup> transporting, lysosomal 42kDa, V1 subunit C2             | 61 |   |
| <b>ATRN</b>     | Attractin                                                                       | 50 |   |
| <b>ATXN1</b>    | Ataxin 1                                                                        | 66 |   |
| <b>ATXN3</b>    | Ataxin 3                                                                        | 86 |   |
| <b>ATXN7</b>    | Ataxin 7                                                                        | 52 |   |
| <b>B3GNT5</b>   | UDP-GlcNAc: $\beta$ Gal $\beta$ -1,3- <i>N</i> -acetylglucosaminyltransferase 5 | 58 |   |
| <b>B4GALT1</b>  | UDP-Gal: $\beta$ GlcNAc $\beta$ 1,4- galactosyltransferase, polypeptide 1       | 53 |   |
| <b>BAG2</b>     | BCL2-associated athanogene 2                                                    | 76 |   |
| <b>BAG4</b>     | BCL2-associated athanogene 4                                                    | 81 |   |
| <b>BAI3</b>     | Brain-specific angiogenesis inhibitor 3                                         | 88 |   |
| <b>BAZ2B</b>    | Bromodomain adjacent to zinc finger domain, 2B                                  | 82 |   |
| <b>BBS7</b>     | Bardet-Biedl syndrome 7                                                         | 71 |   |
| <b>BBS9</b>     | Bardet-Biedl syndrome 9                                                         | 63 |   |
| <b>BCHE</b>     | Butyrylcholinesterase                                                           | 59 |   |
| <b>BCL11A</b>   | B-cell CLL/lymphoma 11A (zinc finger protein)                                   | 52 | v |
| <b>BEND3</b>    | BEN domain containing 3                                                         | 87 |   |
| <b>BHLHE40</b>  | Basic helix-loop-helix family, member e40                                       | 80 |   |
| <b>BIRC6</b>    | Baculoviral IAP repeat containing 6                                             | 97 |   |
| <b>BMP2K</b>    | BMP2 inducible kinase                                                           | 62 |   |
| <b>BOLL</b>     | Bol, boule-like ( <i>Drosophila</i> )                                           | 71 |   |
| <b>BRAP</b>     | BRCA1 associated protein                                                        | 92 |   |

|                  |                                               |     |  |
|------------------|-----------------------------------------------|-----|--|
| <b>BRD1</b>      | Bromodomain containing 1                      | 82  |  |
| <b>BRWD1</b>     | Bromodomain and WD repeat domain containing 1 | 100 |  |
| <b>BTBD3</b>     | BTB (POZ) domain containing 3                 | 84  |  |
| <b>C11orf41</b>  | Chromosome 11 open reading frame 41           | 63  |  |
| <b>C11orf70</b>  | Chromosome 11 open reading frame 70           | 73  |  |
| <b>C11orf87</b>  | Chromosome 11 open reading frame 87           | 51  |  |
| <b>C12orf29</b>  | Chromosome 12 open reading frame 29           | 56  |  |
| <b>C14orf129</b> | Chromosome 14 open reading frame 129          | 94  |  |
| <b>C14orf135</b> | Chromosome 14 open reading frame 135          | 59  |  |
| <b>C14orf28</b>  | Chromosome 14 open reading frame 28           | 56  |  |
| <b>C14orf43</b>  | Chromosome 14 open reading frame 43           | 56  |  |
| <b>C15orf2</b>   | Chromosome 15 open reading frame 2            | 53  |  |
| <b>C15orf29</b>  | Chromosome 15 open reading frame 29           | 77  |  |
| <b>C15orf48</b>  | Chromosome 15 open reading frame 48           | 50  |  |
| <b>C16orf87</b>  | Chromosome 16 open reading frame 87           | 78  |  |
| <b>C16orf95</b>  | Chromosome 16 open reading frame 95           | 58  |  |
| <b>C17orf39</b>  | Chromosome 17 open reading frame 39           | 52  |  |
| <b>C19orf12</b>  | Chromosome 19 open reading frame 12           | 82  |  |
| <b>C1orf109</b>  | Chromosome 1 open reading frame 109           | 60  |  |
| <b>C1orf96</b>   | Chromosome 1 open reading frame 96            | 65  |  |
| <b>C20orf29</b>  | Chromosome 20 open reading frame 29           | 50  |  |
| <b>C2orf54</b>   | Chromosome 2 open reading frame 54            | 57  |  |
| <b>C2orf69</b>   | Chromosome 2 open reading frame 69            | 72  |  |
| <b>C3orf43</b>   | Chromosome 3 open reading frame 43            | 58  |  |
| <b>C3orf62</b>   | Chromosome 3 open reading frame 62            | 75  |  |
| <b>C3orf80</b>   | Chromosome 3 open reading frame 80            | 50  |  |
| <b>C4orf40</b>   | Chromosome 4 open reading frame 40            | 81  |  |
| <b>C5orf41</b>   | Chromosome 5 open reading frame 41            | 97  |  |
| <b>C5orf47</b>   | Chromosome 5 open reading frame 47            | 83  |  |
| <b>C6orf62</b>   | Chromosome 6 open reading frame 62            | 68  |  |
| <b>C6orf89</b>   | Chromosome 6 open reading frame 89            | 72  |  |
| <b>C7orf41</b>   | Chromosome 7 open reading frame 41            | 75  |  |
| <b>C8orf59</b>   | Chromosome 8 open reading frame 59            | 61  |  |

|                  |                                                                     |    |   |
|------------------|---------------------------------------------------------------------|----|---|
| <b>CA5B</b>      | Carbonic anhydrase VB, mitochondrial                                | 56 |   |
| <b>CACNA2D4</b>  | Calcium channel, voltage-dependent, $\alpha 2/\delta$ subunit 4     | 51 |   |
| <b>CALB1</b>     | Calbindin 1, 28 kDa                                                 | 71 |   |
| <b>CALCR</b>     | Calcitonin receptor                                                 | 72 |   |
| <b>CALCRL</b>    | Calcitonin receptor-like                                            | 52 |   |
| <b>CALM1</b>     | Calmodulin 1 (phosphorylase kinase, $\delta$ )                      | 54 |   |
| <b>CAMK2D</b>    | Calcium/calmodulin-dependent protein kinase I $\delta$              | 85 |   |
| <b>CAPRIN1</b>   | Cell cycle associated protein 1                                     | 73 |   |
| <b>CAPRIN2</b>   | Caprin family member 2                                              | 68 |   |
| <b>CARD8</b>     | Caspase recruitment domain family, member 8                         | 77 |   |
| <b>CASK</b>      | Calcium/calmodulin-dependent serine protein kinase (MAGUK family)   | 60 |   |
| <b>CBLB</b>      | Cas-Br-M (murine) ecotropic retroviral transforming sequence b      | 60 | v |
| <b>CBLL1</b>     | Cas-Br-M (murine) ecotropic retroviral transforming sequence-like 1 | 69 |   |
| <b>CBX4</b>      | Chromobox homolog 4                                                 | 54 |   |
| <b>CBX7</b>      | Chromobox homolog 7                                                 | 84 |   |
| <b>CCAR1</b>     | Cell division cycle and apoptosis regulator 1                       | 80 |   |
| <b>CCDC117</b>   | Coiled-coil domain containing 117                                   | 73 |   |
| <b>CCDC14</b>    | Coiled-coil domain containing 14                                    | 87 |   |
| <b>CCDC144NL</b> | Coiled-coil domain containing 144 family, N-terminal like           | 54 |   |
| <b>CCDC25</b>    | Coiled-coil domain containing 25                                    | 65 |   |
| <b>CCDC42</b>    | Coiled-coil domain containing 42                                    | 60 |   |
| <b>CCDC62</b>    | Coiled-coil domain containing 62                                    | 51 |   |
| <b>CCDC75</b>    | Coiled-coil domain containing 75                                    | 59 |   |
| <b>CCDC88C</b>   | Coiled-coil domain containing 88C                                   | 52 |   |
| <b>CCNB1</b>     | Cyclin B1                                                           | 70 |   |
| <b>CCNDBP1</b>   | Cyclin D-type binding-protein 1                                     | 86 |   |
| <b>CCNG1</b>     | Cyclin G1                                                           | 60 |   |
| <b>CCNJ</b>      | Cyclin J                                                            | 77 |   |
| <b>CCNK</b>      | Cyclin K                                                            | 66 |   |
| <b>CCT8L2</b>    | Chaperonin containing TCP1, subunit 8 (theta)-like 2                | 50 |   |
| <b>CD1E</b>      | CD1e molecule                                                       | 50 |   |
| <b>CD302</b>     | CD302 molecule                                                      | 73 |   |
| <b>CD4</b>       | CD4 molecule                                                        | 62 |   |

|                   |                                                                                   |    |  |
|-------------------|-----------------------------------------------------------------------------------|----|--|
| <b>CD48</b>       | CD48 molecule                                                                     | 60 |  |
| <b>CD69</b>       | CD69 molecule                                                                     | 63 |  |
| <b>CDC14B</b>     | CDC14 cell division cycle 14 homolog B ( <i>S. cerevisiae</i> )                   | 52 |  |
| <b>CDC40</b>      | Cell division cycle 40 homolog ( <i>S. cerevisiae</i> )                           | 65 |  |
| <b>CDC42BPA</b>   | CDC42 binding protein kinase $\alpha$ (DMPK-like)                                 | 67 |  |
| <b>CDKN2AIP</b>   | CDKN2A interacting protein                                                        | 52 |  |
| <b>CDKN2AIPNL</b> | CDKN2A interacting protein N-terminal like                                        | 50 |  |
| <b>CDKN3</b>      | Cyclin-dependent kinase inhibitor 3                                               | 51 |  |
| <b>CDON</b>       | Cdon homolog (mouse)                                                              | 79 |  |
| <b>CDYL</b>       | Chromodomain protein, Y-like                                                      | 55 |  |
| <b>CEBPG</b>      | CCAAT/enhancer binding protein (C/EBP), $\gamma$                                  | 59 |  |
| <b>CEP120</b>     | Centrosomal protein 120 kDa                                                       | 64 |  |
| <b>CERS3</b>      | Ceramide synthase 3                                                               | 50 |  |
| <b>CETN3</b>      | Centrin, EF-hand protein, 3                                                       | 64 |  |
| <b>CHCHD7</b>     | Coiled-coil-helix-coiled-coil-helix domain containing 7                           | 52 |  |
| <b>CHD9</b>       | Chromodomain helicase DNA binding protein 9                                       | 50 |  |
| <b>CHMP1B</b>     | Charged multivesicular body protein 1B                                            | 78 |  |
| <b>CHMP2B</b>     | Charged multivesicular body protein 2B                                            | 81 |  |
| <b>CLASP1</b>     | Cytoplasmic linker associated protein 1                                           | 71 |  |
| <b>CLDN8</b>      | Claudin 8                                                                         | 72 |  |
| <b>CLEC3A</b>     | C-type lectin domain family 3, member A                                           | 55 |  |
| <b>CLIP1</b>      | CAP-GLY domain containing linker protein 1                                        | 87 |  |
| <b>CLMN</b>       | Calmin (calponin-like, transmembrane)                                             | 98 |  |
| <b>CLN8</b>       | Ceroid-lipofuscinosis, neuronal 8 (epilepsy, progressive with mental retardation) | 52 |  |
| <b>CLVS1</b>      | Clavesin 1                                                                        | 74 |  |
| <b>CNKSR3</b>     | CNKSR family member 3                                                             | 54 |  |
| <b>CNNM2</b>      | Cyclin M2                                                                         | 68 |  |
| <b>CNOT2</b>      | CCR4-NOT transcription complex, subunit 2                                         | 68 |  |
| <b>CNR1</b>       | Cannabinoid receptor 1 (brain)                                                    | 53 |  |
| <b>CNTN4</b>      | Contactin 4                                                                       | 76 |  |
| <b>COL19A1</b>    | Collagen, type XIX, alpha 1                                                       | 54 |  |
| <b>COPS2</b>      | COP9 constitutive photomorphogenic homolog subunit 2 ( <i>Arabidopsis</i> )       | 68 |  |
| <b>COQ2</b>       | Coenzyme Q2 homolog, prenyltransferase (yeast)                                    | 58 |  |

|                  |                                                                                        |    |   |
|------------------|----------------------------------------------------------------------------------------|----|---|
| <b>CPD</b>       | Carboxypeptidase D                                                                     | 65 |   |
| <b>CPEB4</b>     | Cytoplasmic polyadenylation element binding protein 4                                  | 68 |   |
| <b>CPNE2</b>     | Copine II                                                                              | 84 |   |
| <b>CPOX</b>      | Coproporphyrinogen oxidase                                                             | 97 |   |
| <b>CPSF6</b>     | Cleavage and polyadenylation specific factor 6, 68 kDa                                 | 69 |   |
| <b>CREB1</b>     | cAMP responsive element binding protein 1                                              | 91 | v |
| <b>CREB5</b>     | cAMP responsive element binding protein 5                                              | 83 |   |
| <b>CREBZF</b>    | CREB/ATF bZIP transcription factor                                                     | 67 |   |
| <b>CSF2RB</b>    | Colony stimulating factor 2 receptor, beta, low-affinity (granulocyte-macrophage)      | 73 |   |
| <b>CTDSPL</b>    | CTD (carboxy-terminal domain, RNA polymerase II, polypeptide A) small phosphatase-like | 98 |   |
| <b>CTNNA1</b>    | Catenin (cadherin-associated protein), $\alpha$ 1, 102 kDa                             | 54 |   |
| <b>CTTNBP2NL</b> | CTTNBP2 N-terminal like                                                                | 84 |   |
| <b>CTXN2</b>     | Cortexin 2                                                                             | 56 |   |
| <b>CUL3</b>      | Cullin 3                                                                               | 75 |   |
| <b>CXCL1</b>     | Chemokine (C-X-C motif) ligand 1 (melanoma growth stimulating activity, $\alpha$ )     | 61 |   |
| <b>CXCL2</b>     | Chemokine (C-X-C motif) ligand 2                                                       | 61 |   |
| <b>CXorf23</b>   | Chromosome X open reading frame 23                                                     | 58 |   |
| <b>CYB561D1</b>  | Cytochrome b-561 domain containing 1                                                   | 63 |   |
| <b>CYR61</b>     | Cysteine-rich, angiogenic inducer, 61                                                  | 56 |   |
| <b>DARS</b>      | Aspartyl-tRNA synthetase                                                               | 71 |   |
| <b>DAZAP2</b>    | DAZ associated protein 2                                                               | 69 |   |
| <b>DCBLD2</b>    | Discoidin, CUB and LCCL domain containing 2                                            | 58 |   |
| <b>DCLK1</b>     | Doublecortin-like kinase 1                                                             | 71 |   |
| <b>DCLK3</b>     | Doublecortin-like kinase 3                                                             | 56 |   |
| <b>DCN</b>       | Decorin                                                                                | 80 |   |
| <b>DCUN1D5</b>   | DCN1, defective in cullin neddylation 1, domain containing 5 ( <i>S. cerevisiae</i> )  | 54 |   |
| <b>DDIT4</b>     | DNA-damage-inducible transcript 4                                                      | 53 |   |
| <b>DDX20</b>     | DEAD (Asp-Glu-Ala-Asp) box polypeptide 20                                              | 52 |   |
| <b>DDX3X</b>     | DEAD (Asp-Glu-Ala-Asp) box polypeptide 3, X-linked                                     | 98 |   |
| <b>DDX3Y</b>     | DEAD (Asp-Glu-Ala-Asp) box polypeptide 3, Y-linked                                     | 83 |   |
| <b>DDX52</b>     | DEAD (Asp-Glu-Ala-Asp) box polypeptide 52                                              | 83 |   |
| <b>DDX60L</b>    | DEAD (Asp-Glu-Ala-Asp) box polypeptide 60-like                                         | 58 |   |
| <b>DEPTOR</b>    | DEP domain containing MTOR-interacting protein                                         | 80 |   |

|                 |                                                                            |    |   |
|-----------------|----------------------------------------------------------------------------|----|---|
| <b>DERL1</b>    | Der1-like domain family, member 1                                          | 70 |   |
| <b>DGKH</b>     | Diacylglycerol kinase, eta                                                 | 51 |   |
| <b>DHX29</b>    | DEAH (Asp-Glu-Ala-His) box polypeptide 29                                  | 61 |   |
| <b>DHX57</b>    | DEAH (Asp-Glu-Ala-Asp/His) box polypeptide 57                              | 58 |   |
| <b>DIP2B</b>    | DIP2 disco-interacting protein 2 homolog B (Drosophila)                    | 56 |   |
| <b>DIP2C</b>    | DIP2 disco-interacting protein 2 homolog C (Drosophila)                    | 60 |   |
| <b>DIRAS3</b>   | DIRAS family, GTP-binding RAS-like 3                                       | 72 |   |
| <b>DLGAP1</b>   | Discs, large (Drosophila) homolog-associated protein 1                     | 51 |   |
| <b>DLGAP2</b>   | Discs, large (Drosophila) homolog-associated protein 2                     | 97 |   |
| <b>DMGDH</b>    | Dimethylglycine dehydrogenase                                              | 65 |   |
| <b>DMXL2</b>    | Dmx-like 2                                                                 | 50 |   |
| <b>DNAH8</b>    | Dynein, axonemal, heavy chain 8                                            | 63 |   |
| <b>DNAJA4</b>   | DnaJ (Hsp40) homolog, subfamily A, member 4                                | 67 |   |
| <b>DNAJC13</b>  | DnaJ (Hsp40) homolog, subfamily C, member 13                               | 73 |   |
| <b>DOCK10</b>   | Dedicator of cytokinesis 10                                                | 72 |   |
| <b>DOCK4</b>    | Dedicator of cytokinesis 4                                                 | 54 |   |
| <b>DOCK7</b>    | Dedicator of cytokinesis 7                                                 | 62 |   |
| <b>DPY19L1</b>  | Dpy-19-like 1 ( <i>C. elegans</i> )                                        | 67 |   |
| <b>DPYSL2</b>   | Dihydropyrimidinase-like 2                                                 | 57 |   |
| <b>DSC3</b>     | Desmocollin 3                                                              | 79 |   |
| <b>DYNC1LI2</b> | Dynein, cytoplasmic 1, light intermediate chain 2                          | 83 |   |
| <b>DYNC2H1</b>  | Dynein, cytoplasmic 2, heavy chain 1                                       | 55 |   |
| <b>DZANK1</b>   | Double zinc ribbon and ankyrin repeat domains 1                            | 72 |   |
| <b>E2F5</b>     | E2F transcription factor 5, p130-binding                                   | 87 |   |
| <b>E2F7</b>     | E2F transcription factor 7                                                 | 83 |   |
| <b>EED</b>      | Embryonic ectoderm development                                             | 54 |   |
| <b>EFHA2</b>    | EF-hand domain family, member A2                                           | 90 |   |
| <b>EHF</b>      | Ets homologous factor                                                      | 69 |   |
| <b>EIF2C4</b>   | Eukaryotic translation initiation factor 2C, 4                             | 58 |   |
| <b>EIF4A2</b>   | Eukaryotic translation initiation factor 4A2                               | 86 | v |
| <b>ELAVL2</b>   | ELAV (embryonic lethal, abnormal vision, Drosophila)-like 2 (Hu antigen B) | 58 |   |
| <b>ELAVL4</b>   | ELAV (embryonic lethal, abnormal vision, Drosophila)-like 4 (Hu antigen D) | 66 |   |
| <b>EMB</b>      | Embigin                                                                    | 85 |   |

|                 |                                                                |    |   |
|-----------------|----------------------------------------------------------------|----|---|
| <b>EN1</b>      | Engrailed homeobox 1                                           | 55 |   |
| <b>EN2</b>      | Engrailed homeobox 2                                           | 66 |   |
| <b>ENDOD1</b>   | Endonuclease domain containing 1                               | 51 |   |
| <b>ENPP1</b>    | Ectonucleotide pyrophosphatase/phosphodiesterase 1             | 78 |   |
| <b>ENTPD6</b>   | Ectonucleoside triphosphate diphosphohydrolase 6 (putative)    | 54 |   |
| <b>EPC2</b>     | Enhancer of polycomb homolog 2 (Drosophila)                    | 86 |   |
| <b>ERAP2</b>    | Endoplasmic reticulum aminopeptidase 2                         | 65 |   |
| <b>ERC2</b>     | ELKS/RAB6-interacting/CAST family member 2                     | 64 |   |
| <b>EREG</b>     | Epiregulin                                                     | 63 |   |
| <b>ERI1</b>     | Exoribonuclease 1                                              | 58 |   |
| <b>ERMAP</b>    | Erythroblast membrane-associated protein (Scianna blood group) | 52 |   |
| <b>ESCO2</b>    | Establishment of cohesion 1 homolog 2 ( <i>S. cerevisiae</i> ) | 64 |   |
| <b>ESM1</b>     | Endothelial cell-specific molecule 1                           | 63 |   |
| <b>ESR1</b>     | Estrogen receptor 1                                            | 50 |   |
| <b>ETV6</b>     | Ets variant 6                                                  | 81 | v |
| <b>EVI2A</b>    | Ecotropic viral integration site 2A                            | 57 |   |
| <b>EXD1</b>     | Exonuclease 3'-5' domain containing 1                          | 75 |   |
| <b>EXOC2</b>    | Exocyst complex component 2                                    | 50 |   |
| <b>EXOC5</b>    | Exocyst complex component 5                                    | 61 |   |
| <b>EYS</b>      | Eyes shut homolog (Drosophila)                                 | 80 |   |
| <b>F11</b>      | Coagulation factor XI                                          | 53 |   |
| <b>F2R</b>      | Coagulation factor II (thrombin) receptor                      | 51 |   |
| <b>F5</b>       | Coagulation factor V (proaccelerin, labile factor)             | 61 |   |
| <b>FAM105B</b>  | Family with sequence similarity 105, member B                  | 65 |   |
| <b>FAM135A</b>  | Family with sequence similarity 135, member A                  | 56 |   |
| <b>FAM13B</b>   | Family with sequence similarity 13, member B                   | 73 |   |
| <b>FAM160A2</b> | Family with sequence similarity 160, member A2                 | 70 |   |
| <b>FAM178A</b>  | Family with sequence similarity 178, member A                  | 54 |   |
| <b>FAM179B</b>  | Family with sequence similarity 179, member B                  | 60 |   |
| <b>FAM3C</b>    | Family with sequence similarity 3, member C                    | 68 |   |
| <b>FAM70A</b>   | Family with sequence similarity 70, member A                   | 50 |   |
| <b>FAM82B</b>   | Family with sequence similarity 82, member B                   | 50 |   |
| <b>FAN1</b>     | FANCD2/FANCI-associated nuclease 1                             | 71 |   |



|               |                                                                                                          |    |   |
|---------------|----------------------------------------------------------------------------------------------------------|----|---|
| <b>FAS</b>    | Fas (TNF receptor superfamily, member 6)                                                                 | 59 | v |
| <b>FAT3</b>   | FAT tumor suppressor homolog 3 (Drosophila)                                                              | 65 |   |
| <b>FBN2</b>   | Fibrillin 2                                                                                              | 63 |   |
| <b>FBXL3</b>  | F-box and leucine-rich repeat protein 3                                                                  | 59 |   |
| <b>FBXO33</b> | F-box protein 33                                                                                         | 71 |   |
| <b>FBXO34</b> | F-box protein 34                                                                                         | 97 |   |
| <b>FBXO45</b> | F-box protein 45                                                                                         | 63 |   |
| <b>FHAD1</b>  | Forkhead-associated (FHA) phosphopeptide binding domain 1                                                | 50 |   |
| <b>FIGN</b>   | Fidgetin                                                                                                 | 98 |   |
| <b>FKBP1A</b> | FK506 binding protein 1A, 12 kDa                                                                         | 76 |   |
| <b>FLT1</b>   | Fms-related tyrosine kinase 1 (vascular endothelial growth factor/vascular permeability factor receptor) | 70 |   |
| <b>FLVCR1</b> | Feline leukemia virus subgroup C cellular receptor 1                                                     | 57 |   |
| <b>FMNL2</b>  | Formin-like 2                                                                                            | 76 |   |
| <b>FNBP4</b>  | Formin binding protein 4                                                                                 | 67 |   |
| <b>FNDC3B</b> | Fibronectin type III domain containing 3B                                                                | 81 |   |
| <b>FNIP1</b>  | Folliculin interacting protein 1                                                                         | 55 |   |
| <b>FO XK1</b> | Forkhead box K1                                                                                          | 63 |   |
| <b>FOXP1</b>  | Forkhead box P1                                                                                          | 72 | v |
| <b>FRMD7</b>  | FERM domain containing 7                                                                                 | 56 |   |
| <b>FUCA1</b>  | Fucosidase, alpha-L- 1, tissue                                                                           | 71 |   |
| <b>FUT1</b>   | Fucosyltransferase 1 (galactoside 2- $\alpha$ -L-fucosyltransferase, H blood group)                      | 51 |   |
| <b>FUT9</b>   | Fucosyltransferase 9 ( $\alpha$ (1,3) fucosyltransferase)                                                | 98 |   |
| <b>FZD3</b>   | Frizzled family receptor 3                                                                               | 67 |   |
| <b>G3BP2</b>  | GTPase activating protein (SH3 domain) binding protein 2                                                 | 80 |   |
| <b>GAB1</b>   | GRB2-associated binding protein 1                                                                        | 69 |   |
| <b>GABRA1</b> | $\gamma$ -Aminobutyric acid (GABA) A receptor, alpha 1                                                   | 92 |   |
| <b>GABRA4</b> | $\gamma$ -Aminobutyric acid (GABA) A receptor, alpha 4                                                   | 58 |   |
| <b>GALNT4</b> | UDP-N-acetyl- $\alpha$ -D-galactosamine:polypeptide N-acetylgalactosaminyltransferase 4 (GalNAc-T4)      | 66 |   |
| <b>GAPT</b>   | GRB2-binding adaptor protein, transmembrane                                                              | 50 |   |
| <b>GAPVD1</b> | GTPase activating protein and VPS9 domains 1                                                             | 79 |   |
| <b>GAS7</b>   | Growth arrest-specific 7                                                                                 | 50 | v |

|                  |                                                                               |    |  |
|------------------|-------------------------------------------------------------------------------|----|--|
| <b>GATA6</b>     | GATA binding protein 6                                                        | 74 |  |
| <b>GATM</b>      | Glycine amidinotransferase (L-arginine:glycine amidinotransferase)            | 93 |  |
| <b>GCC2</b>      | GRIP and coiled-coil domain containing 2                                      | 75 |  |
| <b>GCFC1</b>     | GC-rich sequence DNA-binding factor 1                                         | 75 |  |
| <b>GDA</b>       | Guanine deaminase                                                             | 61 |  |
| <b>GFPT1</b>     | Glutamine--fructose-6-phosphate transaminase 1                                | 99 |  |
| <b>GGCT</b>      | $\gamma$ -Glutamylcyclotransferase                                            | 52 |  |
| <b>GHITM</b>     | Growth hormone inducible transmembrane protein                                | 85 |  |
| <b>GIMAP1</b>    | GTPase, IMAP family member 1                                                  | 81 |  |
| <b>GLDN</b>      | Gliomedin                                                                     | 66 |  |
| <b>GLRX</b>      | Glutaredoxin (thioltransferase)                                               | 68 |  |
| <b>GLS</b>       | Glutaminase                                                                   | 52 |  |
| <b>GNA12</b>     | Guanine nucleotide binding protein (G protein) $\alpha$ 12                    | 56 |  |
| <b>GNB4</b>      | Guanine nucleotide binding protein (G protein), $\beta$ polypeptide 4         | 69 |  |
| <b>GOLGA6C</b>   | Golgin A6 family, member C                                                    | 53 |  |
| <b>GOLGA6L10</b> | Golgin A6 family-like 10                                                      | 53 |  |
| <b>GP5</b>       | Glycoprotein V (platelet)                                                     | 62 |  |
| <b>GPBP1</b>     | GC-rich promoter binding protein 1                                            | 92 |  |
| <b>GPCPD1</b>    | Glycerophosphocholine phosphodiesterase GDE1 homolog ( <i>S. cerevisiae</i> ) | 65 |  |
| <b>GPD1L</b>     | Glycerol-3-phosphate dehydrogenase 1-like                                     | 86 |  |
| <b>GPD2</b>      | Glycerol-3-phosphate dehydrogenase 2 (mitochondrial)                          | 85 |  |
| <b>GPR137C</b>   | G protein-coupled receptor 137C                                               | 60 |  |
| <b>GPR26</b>     | G protein-coupled receptor 26                                                 | 98 |  |
| <b>GPR83</b>     | G protein-coupled receptor 83                                                 | 68 |  |
| <b>GPR88</b>     | G protein-coupled receptor 88                                                 | 53 |  |
| <b>GPRIN3</b>    | GPRIN family member 3                                                         | 82 |  |
| <b>GPSM1</b>     | G-protein signaling modulator 1                                               | 55 |  |
| <b>GPX8</b>      | Glutathione peroxidase 8 (putative)                                           | 81 |  |
| <b>GRB10</b>     | Growth factor receptor-bound protein 10                                       | 76 |  |
| <b>GREM1</b>     | Gremlin 1                                                                     | 70 |  |
| <b>GRIN2A</b>    | Glutamate receptor, ionotropic, <i>N</i> -methyl D-aspartate 2A               | 66 |  |
| <b>GRM5</b>      | Glutamate receptor, metabotropic 5                                            | 75 |  |
| <b>GSTCD</b>     | Glutathione <i>S</i> -transferase, C-terminal domain containing               | 58 |  |

|                |                                                                         |    |   |
|----------------|-------------------------------------------------------------------------|----|---|
| <b>GTF2H5</b>  | General transcription factor IIH, polypeptide 5                         | 53 |   |
| <b>GYP A</b>   | Glycophorin A (MNS blood group)                                         | 57 |   |
| <b>H2AFV</b>   | H2A histone family, member V                                            | 65 |   |
| <b>HAO1</b>    | Hydroxyacid oxidase (glycolate oxidase) 1                               | 53 |   |
| <b>HAUS3</b>   | HAUS augmin-like complex, subunit 3                                     | 67 |   |
| <b>HCN1</b>    | Hyperpolarization activated cyclic nucleotide-gated potassium channel 1 | 71 |   |
| <b>HDHD1</b>   | Haloacid dehalogenase-like hydrolase domain containing 1                | 64 |   |
| <b>HEATR3</b>  | HEAT repeat containing 3                                                | 54 |   |
| <b>HECA</b>    | Headcase homolog (Drosophila)                                           | 62 |   |
| <b>HEMGN</b>   | Hemogen                                                                 | 63 |   |
| <b>HEPHL1</b>  | Hephaestin-like 1                                                       | 65 |   |
| <b>HEY2</b>    | Hairy/enhancer-of-split related with YRPW motif 2                       | 76 |   |
| <b>HHLA1</b>   | HERV-H LTR-associating 1                                                | 52 |   |
| <b>HIC2</b>    | Hypermethylated in cancer 2                                             | 78 |   |
| <b>HK2</b>     | Hexokinase 2                                                            | 61 |   |
| <b>HLF</b>     | Hepatic leukemia factor                                                 | 56 | v |
| <b>HMBS</b>    | Hydroxymethylbilane synthase                                            | 58 |   |
| <b>HMGB2</b>   | High mobility group box 2                                               | 55 |   |
| <b>HOOK1</b>   | Hook homolog 1 (Drosophila)                                             | 75 |   |
| <b>HOOK3</b>   | Hook homolog 3 (Drosophila)                                             | 73 | v |
| <b>HOXA1</b>   | Homeobox A1                                                             | 68 |   |
| <b>HOXA11</b>  | Homeobox A11                                                            | 66 | v |
| <b>HOXB4</b>   | Homeobox B4                                                             | 67 |   |
| <b>HOXC8</b>   | Homeobox C8                                                             | 71 |   |
| <b>HOXD1</b>   | Homeobox D1                                                             | 76 |   |
| <b>HOXD3</b>   | Homeobox D3                                                             | 59 |   |
| <b>HRH1</b>    | Histamine receptor H1                                                   | 85 |   |
| <b>HS6ST3</b>  | Heparan sulfate 6-O-sulfotransferase 3                                  | 60 |   |
| <b>HSP90B1</b> | Heat shock protein 90 kDa $\beta$ (Grp94), member 1                     | 56 |   |
| <b>IFNA4</b>   | Interferon, $\alpha$ 4                                                  | 55 |   |
| <b>IIFT74</b>  | Intraflagellar transport 74 homolog (Chlamydomonas)                     | 53 |   |
| <b>IIFT81</b>  | Intraflagellar transport 81 homolog (Chlamydomonas)                     | 52 |   |
| <b>IGF2BP2</b> | Insulin-like growth factor 2 mRNA binding protein 2                     | 55 |   |

|               |                                                                                           |    |   |
|---------------|-------------------------------------------------------------------------------------------|----|---|
| <b>IGSF11</b> | Immunoglobulin superfamily, member 11                                                     | 65 |   |
| <b>IL1A</b>   | Interleukin 1 $\alpha$                                                                    | 69 |   |
| <b>IL1RAP</b> | Interleukin 1 receptor accessory protein                                                  | 54 |   |
| <b>IL2</b>    | Interleukin 2                                                                             | 81 | v |
| <b>IL25</b>   | Interleukin 25                                                                            | 61 |   |
| <b>ILF3</b>   | Interleukin enhancer binding factor 3, 90 kDa                                             | 55 |   |
| <b>INO80</b>  | INO80 homolog ( <i>S. cerevisiae</i> )                                                    | 82 |   |
| <b>INO80D</b> | INO80 complex subunit D                                                                   | 86 |   |
| <b>INPP4A</b> | Inositol polyphosphate-4-phosphatase, type I, 107 kDa                                     | 81 |   |
| <b>INPP5A</b> | Inositol polyphosphate-5-phosphatase, 40 kDa                                              | 61 |   |
| <b>INPP5E</b> | Inositol polyphosphate-5-phosphatase, 72 kDa                                              | 50 |   |
| <b>IPMK</b>   | Inositol polyphosphate multikinase                                                        | 80 |   |
| <b>IPO5</b>   | Importin 5                                                                                | 57 |   |
| <b>IPO7</b>   | Importin 7                                                                                | 78 |   |
| <b>IPO8</b>   | Importin 8                                                                                | 90 |   |
| <b>IRF5</b>   | Interferon regulatory factor 5                                                            | 52 |   |
| <b>IRS2</b>   | Insulin receptor substrate 2                                                              | 62 |   |
| <b>ITGA2</b>  | Integrin, alpha 2 (CD49B, alpha 2 subunit of VLA-2 receptor)                              | 77 |   |
| <b>ITGB8</b>  | Integrin, beta 8                                                                          | 63 |   |
| <b>ITSN1</b>  | Intersectin 1 (SH3 domain protein)                                                        | 85 |   |
| <b>JAM3</b>   | Junctional adhesion molecule 3                                                            | 59 |   |
| <b>JAZF1</b>  | JAZF zinc finger 1                                                                        | 76 | v |
| <b>KALRN</b>  | Kalirin, RhoGEF kinase                                                                    | 61 |   |
| <b>KANK1</b>  | KN motif and ankyrin repeat domains 1                                                     | 72 |   |
| <b>KAT2B</b>  | K(lysine) acetyltransferase 2B                                                            | 67 |   |
| <b>KCNA4</b>  | Potassium voltage-gated channel, shaker-related subfamily, member 4                       | 77 |   |
| <b>KCNH1</b>  | Potassium voltage-gated channel, subfamily H (eag-related), member 1                      | 86 |   |
| <b>KCNH8</b>  | Potassium voltage-gated channel, subfamily H (eag-related), member 8                      | 78 |   |
| <b>KCNK10</b> | Potassium channel, subfamily K, member 10                                                 | 52 |   |
| <b>KCNMB2</b> | Potassium large conductance calcium-activated channel, subfamily M, beta member 2         | 58 |   |
| <b>KCNN3</b>  | Potassium intermediate/small conductance calcium-activated channel, subfamily N, member 3 | 66 |   |
| <b>KCNQ5</b>  | Potassium voltage-gated channel, KQT-like subfamily, member 5                             | 91 |   |

|                  |                                                       |    |   |
|------------------|-------------------------------------------------------|----|---|
| <b>KCTD3</b>     | Potassium channel tetramerisation domain containing 3 | 71 |   |
| <b>KDM4C</b>     | Lysine (K)-specific demethylase 4C                    | 60 |   |
| <b>KDM5A</b>     | Lysine (K)-specific demethylase 5A                    | 84 | v |
| <b>KIAA0195</b>  | KIAA0195                                              | 85 |   |
| <b>KIAA0196</b>  | KIAA0196                                              | 54 |   |
| <b>KIAA0247</b>  | KIAA0247                                              | 53 |   |
| <b>KIAA0528</b>  | KIAA0528                                              | 97 |   |
| <b>KIAA0825</b>  | KIAA0825                                              | 66 |   |
| <b>KIAA1239</b>  | KIAA1239                                              | 82 |   |
| <b>KIAA1244</b>  | KIAA1244                                              | 64 |   |
| <b>KIAA1324L</b> | KIAA1324-like                                         | 62 |   |
| <b>KIAA1715</b>  | KIAA1715                                              | 54 |   |
| <b>KIAA2022</b>  | KIAA2022                                              | 57 |   |
| <b>KIF3A</b>     | Kinesin family member 3A                              | 93 |   |
| <b>KIF3B</b>     | Kinesin family member 3B                              | 60 |   |
| <b>KITLG</b>     | KIT ligand                                            | 66 |   |
| <b>KLF15</b>     | Kruppel-like factor 15                                | 56 |   |
| <b>KLF3</b>      | Kruppel-like factor 3 (basic)                         | 52 |   |
| <b>KLF6</b>      | Kruppel-like factor 6                                 | 95 |   |
| <b>KLHDC5</b>    | Kelch domain containing 5                             | 58 |   |
| <b>KLHL2</b>     | Kelch-like 2, Mayven (Drosophila)                     | 86 |   |
| <b>KLHL29</b>    | Kelch-like 29 (Drosophila)                            | 72 |   |
| <b>KLHL5</b>     | Kelch-like 5 (Drosophila)                             | 87 |   |
| <b>KPNA1</b>     | Karyopherin $\alpha$ 1 (importin $\alpha$ 5)          | 56 |   |
| <b>KPNA4</b>     | Karyopherin $\alpha$ 4 (importin $\alpha$ 3)          | 76 |   |
| <b>KPNB1</b>     | Karyopherin (importin) $\beta$ 1                      | 69 |   |
| <b>KRAS</b>      | V-Ki-ras2 Kirsten rat sarcoma viral oncogene homolog  | 86 |   |
| <b>KRIT1</b>     | KRIT1, ankyrin repeat containing                      | 52 |   |
| <b>LAMP2</b>     | Lysosomal-associated membrane protein 2               | 78 |   |
| <b>LAPTM4B</b>   | Lysosomal protein transmembrane 4 $\beta$             | 66 |   |
| <b>LARP4</b>     | La ribonucleoprotein domain family, member 4          | 97 |   |
| <b>LBR</b>       | Lamin B receptor                                      | 63 |   |
| <b>LCLAT1</b>    | Lysocardiolipin acyltransferase 1                     | 64 |   |

|                     |                                                                 |    |   |
|---------------------|-----------------------------------------------------------------|----|---|
| <b>LCOR</b>         | Ligand dependent nuclear receptor corepressor                   | 62 |   |
| <b>LCTL</b>         | Lactase-like                                                    | 69 |   |
| <b>LEPROT</b>       | Leptin receptor overlapping transcript                          | 52 |   |
| <b>LGALSL</b>       | Lectin, galactoside-binding-like                                | 76 |   |
| <b>LHFPL3</b>       | Lipoma HMGIC fusion partner-like 3                              | 75 |   |
| <b>LIFR</b>         | Leukemia inhibitory factor receptor alpha                       | 79 | v |
| <b>LIN28A</b>       | Lin-28 homolog A ( <i>C. elegans</i> )                          | 62 |   |
| <b>LIN28B</b>       | Lin-28 homolog B ( <i>C. elegans</i> )                          | 60 |   |
| <b>LMAN1</b>        | Lectin, mannose-binding, 1                                      | 66 |   |
| <b>LMBRD2</b>       | LMBR1 domain containing 2                                       | 85 |   |
| <b>LMO3</b>         | LIM domain only 3 (rhombotin-like 2)                            | 73 |   |
| <b>LOC100506012</b> | Serine/threonine-protein phosphatase 5-like                     | 68 |   |
| <b>LOC100507203</b> | Uncharacterized LOC100507203                                    | 80 |   |
| <b>LOC100653112</b> | Heparan-sulfate 6-O-sulfotransferase 3-like                     | 60 |   |
| <b>LOC100653234</b> | Uncharacterized LOC100653234                                    | 76 |   |
| <b>LOC100653247</b> | Dual specificity protein phosphatase 22-like                    | 58 |   |
| <b>LOC731932</b>    | Uncharacterized LOC731932                                       | 53 |   |
| <b>LONRF1</b>       | LON peptidase N-terminal domain and ring finger 1               | 55 |   |
| <b>LONRF2</b>       | LON peptidase N-terminal domain and ring finger 2               | 74 |   |
| <b>LOX</b>          | Lysyl oxidase                                                   | 75 |   |
| <b>LPCAT2</b>       | Lysophosphatidylcholine acyltransferase 2                       | 81 |   |
| <b>LPP</b>          | LIM domain containing preferred translocation partner in lipoma | 77 | v |
| <b>LRBA</b>         | LPS-responsive vesicle trafficking, beach and anchor containing | 65 |   |
| <b>LRP12</b>        | Low density lipoprotein receptor-related protein 12             | 53 |   |
| <b>LRRC32</b>       | Leucine rich repeat containing 32                               | 75 |   |
| <b>LRRC8D</b>       | Leucine rich repeat containing 8 family, member D               | 86 |   |
| <b>LRRN1</b>        | Leucine rich repeat neuronal 1                                  | 70 |   |
| <b>LTV1</b>         | LTV1 homolog ( <i>S. cerevisiae</i> )                           | 54 |   |

|                   |                                                                                             |    |   |
|-------------------|---------------------------------------------------------------------------------------------|----|---|
| <b>LY75-CD302</b> | LY75-CD302 readthrough                                                                      | 73 |   |
| <b>LYRM1</b>      | LYR motif containing 1                                                                      | 68 |   |
| <b>MAB21L3</b>    | Mab-21-like 3 ( <i>C. elegans</i> )                                                         | 57 |   |
| <b>MAGEA4</b>     | Melanoma antigen family A, 4                                                                | 51 |   |
| <b>MAGOHB</b>     | Mago-nashi homolog B ( <i>Drosophila</i> )                                                  | 68 |   |
| <b>MAMDC2</b>     | MAM domain containing 2                                                                     | 61 |   |
| <b>MAP1B</b>      | Microtubule-associated protein 1B                                                           | 69 |   |
| <b>MAP2K1</b>     | Mitogen-activated protein kinase kinase 1                                                   | 60 | v |
| <b>MAP2K4</b>     | Mitogen-activated protein kinase kinase 4                                                   | 57 | v |
| <b>MAP3K3</b>     | Mitogen-activated protein kinase kinase kinase 3                                            | 51 |   |
| <b>MAP3K8</b>     | Mitogen-activated protein kinase kinase kinase 8                                            | 55 |   |
| <b>MAPK1</b>      | Mitogen-activated protein kinase 1                                                          | 73 |   |
| <b>MAPK1IP1L</b>  | Mitogen-activated protein kinase 1 interacting protein 1-like                               | 65 |   |
| <b>MARC2</b>      | Mitochondrial amidoxime reducing component 2                                                | 70 |   |
| <b>MARK1</b>      | MAP/microtubule affinity-regulating kinase 1                                                | 73 |   |
| <b>MASP1</b>      | Mannan-binding lectin serine peptidase 1 (C4/C2 activating component of Ra-reactive factor) | 52 |   |
| <b>MAT2A</b>      | Methionine adenosyltransferase Iia                                                          | 51 |   |
| <b>MATN3</b>      | Matrilin 3                                                                                  | 79 |   |
| <b>MB21D2</b>     | Mab-21 domain containing 2                                                                  | 72 |   |
| <b>MBLAC2</b>     | Metallo- $\beta$ -lactamase domain containing 2                                             | 80 |   |
| <b>MBNL1</b>      | Muscleblind-like ( <i>Drosophila</i> )                                                      | 70 |   |
| <b>MBOAT2</b>     | Membrane bound <i>O</i> -acyltransferase domain containing 2                                | 73 |   |
| <b>MBTPS2</b>     | Membrane-bound transcription factor peptidase, site 2                                       | 68 |   |
| <b>MCC</b>        | Mutated in colorectal cancers                                                               | 57 |   |
| <b>MCTP2</b>      | Multiple C2 domains, transmembrane 2                                                        | 64 |   |
| <b>MCTS1</b>      | Malignant T cell amplified sequence 1                                                       | 67 |   |
| <b>MDH1B</b>      | Malate dehydrogenase 1B, NAD (soluble)                                                      | 59 |   |
| <b>MDM4</b>       | Mdm4 p53 binding protein homolog (mouse)                                                    | 53 | v |
| <b>MED12L</b>     | Mediator complex subunit 12-like                                                            | 74 |   |
| <b>MED20</b>      | Mediator complex subunit 20                                                                 | 54 |   |
| <b>MED8</b>       | Mediator complex subunit 8                                                                  | 76 |   |
| <b>MEGF10</b>     | Multiple EGF-like-domains 10                                                                | 52 |   |

|                |                                                                                                 |    |   |
|----------------|-------------------------------------------------------------------------------------------------|----|---|
| <b>MEGF9</b>   | Multiple EGF-like-domains 9                                                                     | 72 |   |
| <b>MELK</b>    | Maternal embryonic leucine zipper kinase                                                        | 70 |   |
| <b>MET</b>     | Met proto-oncogene (hepatocyte growth factor receptor)                                          | 50 | v |
| <b>METAP1</b>  | Methionyl aminopeptidase 1                                                                      | 95 |   |
| <b>METAP2</b>  | Methionyl aminopeptidase 2                                                                      | 82 |   |
| <b>METTL20</b> | Methyltransferase like 20                                                                       | 60 |   |
| <b>MFSD6</b>   | Major facilitator superfamily domain containing 6                                               | 61 |   |
| <b>MIA2</b>    | Melanoma inhibitory activity 2                                                                  | 57 |   |
| <b>MID2</b>    | Midline 2                                                                                       | 73 |   |
| <b>MIER3</b>   | Mesoderm induction early response 1, family member 3                                            | 76 |   |
| <b>MINA</b>    | MYC induced nuclear antigen                                                                     | 70 |   |
| <b>MIP</b>     | Major intrinsic protein of lens fiber                                                           | 61 |   |
| <b>MKLN1</b>   | Muskelin 1, intracellular mediator containing kelch motifs                                      | 73 |   |
| <b>MKRN1</b>   | Makorin ring finger protein 1                                                                   | 55 |   |
| <b>MLL</b>     | Myeloid/lymphoid or mixed-lineage leukemia (trithorax homolog, Drosophila)                      | 97 | v |
| <b>MLL3</b>    | Myeloid/lymphoid or mixed-lineage leukemia 3                                                    | 55 | v |
| <b>MLL5</b>    | Myeloid/lymphoid or mixed-lineage leukemia 5 (trithorax homolog, Drosophila)                    | 62 |   |
| <b>MLLT10</b>  | Myeloid/lymphoid or mixed-lineage leukemia (trithorax homolog, Drosophila); translocated to, 10 | 63 | v |
| <b>MME</b>     | Membrane metallo-endopeptidase                                                                  | 61 |   |
| <b>MORC3</b>   | MORC family CW-type zinc finger 3                                                               | 75 |   |
| <b>MOSPD1</b>  | Motile sperm domain containing 1                                                                | 69 |   |
| <b>MPP5</b>    | Membrane protein, palmitoylated 5 (MAGUK p55 subfamily member 5)                                | 84 |   |
| <b>MPP7</b>    | Membrane protein, palmitoylated 7 (MAGUK p55 subfamily member 7)                                | 68 |   |
| <b>MRPL13</b>  | Mitochondrial ribosomal protein L13                                                             | 66 |   |
| <b>MRPS16</b>  | Mitochondrial ribosomal protein S16                                                             | 64 |   |
| <b>MRPS35</b>  | Mitochondrial ribosomal protein S35                                                             | 68 |   |
| <b>MTF2</b>    | Metal response element binding transcription factor 2                                           | 89 |   |
| <b>MTMR12</b>  | Myotubularin related protein 12                                                                 | 88 |   |
| <b>MTMR9</b>   | Myotubularin related protein 9                                                                  | 52 |   |
| <b>MTUS1</b>   | Microtubule associated tumor suppressor 1                                                       | 66 |   |
| <b>MTX3</b>    | Metaxin 3                                                                                       | 78 |   |
| <b>MUC7</b>    | Mucin 7, secreted                                                                               | 84 |   |



|                 |                                                                                               |    |   |
|-----------------|-----------------------------------------------------------------------------------------------|----|---|
| <b>MYH15</b>    | Myosin, heavy chain 15                                                                        | 56 |   |
| <b>MYO1E</b>    | Myosin IE                                                                                     | 57 |   |
| <b>MYSM1</b>    | Myb-like, SWIRM and MPN domains 1                                                             | 68 |   |
| <b>NAAA</b>     | <i>N</i> -acylethanolamine acid amidase                                                       | 51 |   |
| <b>NAALADL2</b> | <i>N</i> -acetylated $\alpha$ -linked acidic dipeptidase-like 2                               | 58 |   |
| <b>NAP1L1</b>   | Nucleosome assembly protein 1-like 1                                                          | 54 |   |
| <b>NARG2</b>    | NMDA receptor regulated 2                                                                     | 80 |   |
| <b>NCOA2</b>    | Nuclear receptor coactivator 2                                                                | 74 | v |
| <b>NDRG4</b>    | NDRG family member 4                                                                          | 52 |   |
| <b>NDUFAF4</b>  | NADH dehydrogenase (ubiquinone) 1 alpha subcomplex, assembly factor 4                         | 50 |   |
| <b>NEK2</b>     | NIMA (never in mitosis gene a)-related kinase 2                                               | 52 |   |
| <b>NEK7</b>     | NIMA (never in mitosis gene a)-related kinase 7                                               | 82 |   |
| <b>NFAT5</b>    | Nuclear factor of activated T-cells 5, tonicity-responsive                                    | 99 |   |
| <b>NFATC2IP</b> | Nuclear factor of activated T-cells, cytoplasmic, calcineurin-dependent 2 interacting protein | 59 |   |
| <b>NFIB</b>     | Nuclear factor I/B                                                                            | 60 | v |
| <b>NFYB</b>     | Nuclear transcription factor Y, $\beta$                                                       | 51 |   |
| <b>NIPAL4</b>   | NIPA-like domain containing 4                                                                 | 56 |   |
| <b>NKAIN2</b>   | Na <sup>+</sup> /K <sup>+</sup> transporting ATPase interacting 2                             | 66 |   |
| <b>NLN</b>      | Neurolysin (metallopeptidase M3 family)                                                       | 88 |   |
| <b>NMT2</b>     | N-myristoyltransferase 2                                                                      | 51 |   |
| <b>NOTCH2</b>   | Notch 2                                                                                       | 65 | v |
| <b>NOTCH4</b>   | Notch 4                                                                                       | 74 |   |
| <b>NOVA1</b>    | Neuro-oncological ventral antigen 1                                                           | 94 |   |
| <b>NPTXR</b>    | Neuronal pentraxin receptor                                                                   | 65 |   |
| <b>NR1D2</b>    | Nuclear receptor subfamily 1, group D, member 2                                               | 55 |   |
| <b>NR2C2</b>    | Nuclear receptor subfamily 2, group C, member 2                                               | 53 |   |
| <b>NR3C1</b>    | Nuclear receptor subfamily 3, group C, member 1 (glucocorticoid receptor)                     | 77 |   |
| <b>NR4A3</b>    | Nuclear receptor subfamily 4, group A, member 3                                               | 63 | v |
| <b>NR6A1</b>    | Nuclear receptor subfamily 6, group A, member 1                                               | 66 |   |
| <b>NRAS</b>     | Neuroblastoma RAS viral (v-ras) oncogene homolog                                              | 72 | v |
| <b>NRXN1</b>    | Neurexin 1                                                                                    | 53 |   |
| <b>NSUN7</b>    | NOP2/Sun domain family, member 7                                                              | 60 |   |

|                 |                                                                             |    |   |
|-----------------|-----------------------------------------------------------------------------|----|---|
| <b>NTS</b>      | Neurotensin                                                                 | 73 |   |
| <b>NUCKS1</b>   | Nuclear casein kinase and cyclin-dependent kinase substrate 1               | 50 |   |
| <b>NUDT12</b>   | Nudix (nucleoside diphosphate linked moiety X)-type motif 12                | 82 |   |
| <b>NUDT21</b>   | Nudix (nucleoside diphosphate linked moiety X)-type motif 21                | 65 |   |
| <b>NUDT4</b>    | Nudix (nucleoside diphosphate linked moiety X)-type motif 4                 | 53 |   |
| <b>NUFIP1</b>   | Nuclear fragile X mental retardation protein interacting protein 1          | 70 |   |
| <b>NUFIP2</b>   | Nuclear fragile X mental retardation protein interacting protein 2          | 54 |   |
| <b>O3FAR1</b>   | $\omega$ 3-Fatty acid receptor 1                                            | 51 |   |
| <b>OCIAD1</b>   | OCIA domain containing 1                                                    | 64 |   |
| <b>OGFRL1</b>   | Opioid growth factor receptor-like 1                                        | 61 |   |
| <b>ONECUT2</b>  | One cut homeobox 2                                                          | 86 |   |
| <b>OSBPL2</b>   | Oxysterol binding protein-like 2                                            | 50 |   |
| <b>OSBPL3</b>   | Oxysterol binding protein-like 3                                            | 99 |   |
| <b>OSBPL8</b>   | Oxysterol binding protein-like 8                                            | 86 |   |
| <b>OTUD4</b>    | OTU domain containing 4                                                     | 77 |   |
| <b>OXGR1</b>    | Oxoglutarate (alpha-ketoglutarate) receptor 1                               | 56 |   |
| <b>PABPC5</b>   | Poly(A) binding protein, cytoplasmic 5                                      | 87 |   |
| <b>PAFAH1B2</b> | Platelet-activating factor acetylhydrolase 1b, catalytic subunit 2 (30 kDa) | 62 |   |
| <b>PAG1</b>     | Phosphoprotein associated with glycosphingolipid microdomains 1             | 57 |   |
| <b>PALM2</b>    | Paralemmin 2                                                                | 56 |   |
| <b>PAM</b>      | Peptidylglycine alpha-amidating monooxygenase                               | 97 |   |
| <b>PAPD5</b>    | PAP associated domain containing 5                                          | 99 |   |
| <b>PAPOLG</b>   | Poly(A) polymerase gamma                                                    | 78 |   |
| <b>PARK2</b>    | Parkinson protein 2, E3 ubiquitin protein ligase (parkin)                   | 77 |   |
| <b>PARM1</b>    | Prostate androgen-regulated mucin-like protein 1                            | 66 |   |
| <b>PARP11</b>   | Poly (ADP-ribose) polymerase family, member 11                              | 74 |   |
| <b>PAWR</b>     | PRKC, apoptosis, WT1, regulator                                             | 72 |   |
| <b>PAX6</b>     | Paired box 6                                                                | 55 |   |
| <b>PAX9</b>     | Paired box 9                                                                | 77 |   |
| <b>PBX1</b>     | Pre-B-cell leukemia homeobox 1                                              | 56 | v |
| <b>PBX3</b>     | Pre-B-cell leukemia homeobox 3                                              | 51 |   |
| <b>PCDH11Y</b>  | Protocadherin 11 Y-linked                                                   | 66 |   |
| <b>PCDH15</b>   | Protocadherin-related 15                                                    | 54 |   |

|                |                                                               |     |   |
|----------------|---------------------------------------------------------------|-----|---|
| <b>PCDHA1</b>  | Protocadherin $\alpha$ 1                                      | 80  |   |
| <b>PCDHA10</b> | Protocadherin $\alpha$ 10                                     | 80  |   |
| <b>PCDHA11</b> | Protocadherin $\alpha$ 11                                     | 80  |   |
| <b>PCDHA12</b> | Protocadherin $\alpha$ 12                                     | 80  |   |
| <b>PCDHA13</b> | Protocadherin $\alpha$ 13                                     | 80  |   |
| <b>PCDHA2</b>  | protocadherin $\alpha$ 2                                      | 80  |   |
| <b>PCDHA3</b>  | Protocadherin $\alpha$ 3                                      | 80  |   |
| <b>PCDHA4</b>  | Protocadherin $\alpha$ 4                                      | 80  |   |
| <b>PCDHA5</b>  | Protocadherin $\alpha$ 5                                      | 80  |   |
| <b>PCDHA6</b>  | Protocadherin $\alpha$ 6                                      | 80  |   |
| <b>PCDHA7</b>  | Protocadherin $\alpha$ 7                                      | 80  |   |
| <b>PCDHA8</b>  | Protocadherin $\alpha$ 8                                      | 72  |   |
| <b>PCDHA9</b>  | Protocadherin $\alpha$ 9                                      | 72  |   |
| <b>PCDHAC1</b> | Protocadherin $\alpha$ subfamily C, 1                         | 80  |   |
| <b>PCDHAC2</b> | Protocadherin $\alpha$ subfamily C, 2                         | 95  |   |
| <b>PCGF3</b>   | Polycomb group ring finger 3                                  | 52  |   |
| <b>PCID2</b>   | PCI domain containing 2                                       | 70  |   |
| <b>PCNP</b>    | PEST proteolytic signal containing nuclear protein            | 82  |   |
| <b>PCSK1</b>   | Proprotein convertase subtilisin/kexin type 1                 | 58  |   |
| <b>PDAP1</b>   | PDGFA associated protein 1                                    | 63  |   |
| <b>PDCD6IP</b> | Programmed cell death 6 interacting protein                   | 59  |   |
| <b>PDE5A</b>   | Phosphodiesterase 5A, cGMP-specific                           | 100 |   |
| <b>PDGFRA</b>  | Platelet-derived growth factor receptor, $\alpha$ polypeptide | 69  | v |
| <b>PDK1</b>    | Pyruvate dehydrogenase kinase, isozyme 1                      | 52  |   |
| <b>PEAK1</b>   | NKF3 kinase family member                                     | 67  |   |
| <b>PER3</b>    | Period homolog 3 (Drosophila)                                 | 83  |   |
| <b>PET117</b>  | Cytochrome c oxidase assembly factor-like                     | 59  |   |
| <b>PEX13</b>   | Peroxisomal biogenesis factor 13                              | 62  |   |
| <b>PGAP1</b>   | Post-GPI attachment to proteins 1                             | 95  |   |
| <b>PGPEP1L</b> | Pyroglutamyl-peptidase I-like                                 | 52  |   |
| <b>PGR</b>     | Progesterone receptor                                         | 62  |   |
| <b>PHACTR2</b> | Phosphatase and actin regulator 2                             | 69  |   |
| <b>PHACTR4</b> | Phosphatase and actin regulator 4                             | 57  |   |

|                     |                                                                                              |    |   |
|---------------------|----------------------------------------------------------------------------------------------|----|---|
| <b>PHC3</b>         | Polyhomeotic homolog 3 (Drosophila)                                                          | 71 |   |
| <b>PHF20L1</b>      | PHD finger protein 20-like 1                                                                 | 87 |   |
| <b>PHF3</b>         | PHD finger protein 3                                                                         | 55 |   |
| <b>PHLPP2</b>       | PH domain and leucine rich repeat protein phosphatase 2                                      | 73 |   |
| <b>PHTF2</b>        | Putative homeodomain transcription factor 2                                                  | 70 |   |
| <b>PI4K2B</b>       | Phosphatidylinositol 4-kinase type 2 $\beta$                                                 | 85 |   |
| <b>PIK3C2A</b>      | Phosphoinositide-3-kinase, class 2, $\alpha$ polypeptide                                     | 65 |   |
| <b>PIK3R3</b>       | Phosphoinositide-3-kinase, regulatory subunit 3 $\gamma$                                     | 58 |   |
| <b>PITPNB</b>       | Phosphatidylinositol transfer protein, beta                                                  | 75 |   |
| <b>PKNOX1</b>       | PBX/knotted 1 homeobox 1                                                                     | 69 |   |
| <b>PKNOX2</b>       | PBX/knotted 1 homeobox 2                                                                     | 71 |   |
| <b>PKP2</b>         | Plakophilin 2                                                                                | 67 |   |
| <b>PLA2G4C</b>      | Phospholipase A2, group IVC (cytosolic, calcium-independent)                                 | 57 |   |
| <b>PLAC1L</b>       | Placenta-specific 1-like                                                                     | 83 |   |
| <b>PLAG1</b>        | Pleiomorphic adenoma gene 1                                                                  | 61 | v |
| <b>PLAU</b>         | Plasminogen activator, urokinase                                                             | 67 |   |
| <b>PLCL2</b>        | Phospholipase C-like 2                                                                       | 67 |   |
| <b>PLD1</b>         | Phospholipase D1, phosphatidylcholine-specific                                               | 55 |   |
| <b>PLDN</b>         | Pallidin homolog (mouse)                                                                     | 70 |   |
| <b>PLEKHA3</b>      | Pleckstrin homology domain containing, family A (phosphoinositide binding specific) member 3 | 88 |   |
| <b>PLEKHA8</b>      | Pleckstrin homology domain containing, family A (phosphoinositide binding specific) member 8 | 66 |   |
| <b>PLG</b>          | Plasminogen                                                                                  | 82 |   |
| <b>PLSCR5</b>       | Phospholipid scramblase family, member 5                                                     | 55 |   |
| <b>PMAIP1</b>       | Phorbol-12-myristate-13-acetate-induced protein 1                                            | 50 |   |
| <b>PNMA1</b>        | Paraneoplastic antigen MA1                                                                   | 56 |   |
| <b>PNPT1</b>        | Polyribonucleotide nucleotidyltransferase 1                                                  | 53 |   |
| <b>PNRC2</b>        | Proline-rich nuclear receptor coactivator 2                                                  | 72 |   |
| <b>POC1B-GALNT4</b> | POC1B-GALNT4 readthrough                                                                     | 55 |   |
| <b>POLI</b>         | Polymerase (DNA directed) iota                                                               | 68 |   |
| <b>POLQ</b>         | Polymerase (DNA directed), theta                                                             | 81 |   |

|                 |                                                                                                              |    |  |
|-----------------|--------------------------------------------------------------------------------------------------------------|----|--|
| <b>POLR3G</b>   | Polymerase (RNA) III (DNA directed) polypeptide G (32 kD)                                                    | 70 |  |
| <b>POM121</b>   | POM121 membrane glycoprotein                                                                                 | 81 |  |
| <b>POM121C</b>  | POM121 membrane glycoprotein C                                                                               | 73 |  |
| <b>POMC</b>     | Proopiomelanocortin                                                                                          | 53 |  |
| <b>POU2F1</b>   | POU class 2 homeobox 1                                                                                       | 68 |  |
| <b>PPARA</b>    | Peroxisome proliferator-activated receptor- $\alpha$                                                         | 54 |  |
| <b>PPFIA1</b>   | Protein tyrosine phosphatase, receptor type, f polypeptide (PTPRF), interacting protein (liprin), $\alpha$ 1 | 53 |  |
| <b>PPP5K2</b>   | Diphosphoinositol pentakisphosphate kinase 2                                                                 | 63 |  |
| <b>PPP1R12B</b> | Protein phosphatase 1, regulatory subunit 12B                                                                | 90 |  |
| <b>PPP1R3B</b>  | Protein phosphatase 1, regulatory subunit 3B                                                                 | 68 |  |
| <b>PPP1R3C</b>  | Protein phosphatase 1, regulatory subunit 3C                                                                 | 64 |  |
| <b>PPP1R3D</b>  | Protein phosphatase 1, regulatory subunit 3D                                                                 | 57 |  |
| <b>PPP1R9A</b>  | Protein phosphatase 1, regulatory subunit 9A                                                                 | 72 |  |
| <b>PPP2R5E</b>  | Protein phosphatase 2, regulatory subunit B', epsilon isoform                                                | 72 |  |
| <b>PPP3R1</b>   | Protein phosphatase 3, regulatory subunit B, $\alpha$                                                        | 60 |  |
| <b>PRDM4</b>    | PR domain containing 4                                                                                       | 71 |  |
| <b>PRDX3</b>    | Peroxiredoxin 3                                                                                              | 84 |  |
| <b>PRH2</b>     | Proline-rich protein HaeIII subfamily 2                                                                      | 79 |  |
| <b>PRKCD</b>    | Protein kinase C, $\delta$                                                                                   | 70 |  |
| <b>PRKCE</b>    | Protein kinase C, epsilon                                                                                    | 58 |  |
| <b>PRKG1</b>    | Protein kinase, cGMP-dependent, type I                                                                       | 89 |  |
| <b>PRLR</b>     | Prolactin receptor                                                                                           | 72 |  |
| <b>PROCR</b>    | Protein C receptor, endothelial                                                                              | 51 |  |
| <b>PROSER1</b>  | Proline and serine rich 1                                                                                    | 57 |  |
| <b>PRR20A</b>   | Proline rich 20A                                                                                             | 52 |  |
| <b>PRR20B</b>   | Proline rich 20B                                                                                             | 52 |  |
| <b>PRR20C</b>   | Proline rich 20C                                                                                             | 52 |  |
| <b>PRR20D</b>   | Proline rich 20D                                                                                             | 52 |  |
| <b>PRR20E</b>   | Proline rich 20E                                                                                             | 52 |  |
| <b>PRRC1</b>    | Proline-rich coiled-coil 1                                                                                   | 53 |  |
| <b>PRRC2C</b>   | Proline-rich coiled-coil 2C                                                                                  | 52 |  |
| <b>PRRG4</b>    | Proline rich Gla (G-carboxyglutamic acid) 4 (transmembrane)                                                  | 58 |  |

|                 |                                                                                       |     |   |
|-----------------|---------------------------------------------------------------------------------------|-----|---|
| <b>PRSS16</b>   | Protease, serine, 16 (thymus)                                                         | 56  |   |
| <b>PRTG</b>     | Protogenin                                                                            | 100 |   |
| <b>PSG11</b>    | Pregnancy specific $\beta$ -1-glycoprotein 11                                         | 67  |   |
| <b>PSG3</b>     | Pregnancy specific $\beta$ -1-glycoprotein 3                                          | 67  |   |
| <b>PSG5</b>     | Pregnancy specific $\beta$ -1-glycoprotein 5                                          | 70  |   |
| <b>PSG9</b>     | Pregnancy specific $\beta$ -1-glycoprotein 9                                          | 64  |   |
| <b>PSRC1</b>    | Proline/serine-rich coiled-coil 1                                                     | 71  |   |
| <b>PTBP2</b>    | Polypyrimidine tract binding protein 2                                                | 64  |   |
| <b>PTBP3</b>    | Polypyrimidine tract binding protein 3                                                | 75  |   |
| <b>PTGER3</b>   | Prostaglandin E receptor 3 (subtype EP3)                                              | 74  |   |
| <b>PTGS2</b>    | Prostaglandin-endoperoxide synthase 2 (prostaglandin G/H synthase and cyclooxygenase) | 55  |   |
| <b>PTPN22</b>   | Protein tyrosine phosphatase, non-receptor type 22 (lymphoid)                         | 69  |   |
| <b>PTPN9</b>    | Protein tyrosine phosphatase, non-receptor type 9                                     | 64  |   |
| <b>PTPRB</b>    | Protein tyrosine phosphatase, receptor type, B                                        | 55  |   |
| <b>QSER1</b>    | Glutamine and serine rich 1                                                           | 51  |   |
| <b>RAB11A</b>   | RAB11A, member RAS oncogene family                                                    | 72  |   |
| <b>RAB27B</b>   | RAB27B, member RAS oncogene family                                                    | 65  |   |
| <b>RAB3GAP1</b> | RAB3 GTPase activating protein subunit 1 (catalytic)                                  | 77  |   |
| <b>RAB3IP</b>   | RAB3A interacting protein (rabin3)                                                    | 97  |   |
| <b>RAB40B</b>   | RAB40B, member RAS oncogene family                                                    | 56  |   |
| <b>RABGEF1</b>  | RAB guanine nucleotide exchange factor (GEF) 1                                        | 58  |   |
| <b>RAD21</b>    | RAD21 homolog ( <i>S. pombe</i> )                                                     | 88  | v |
| <b>RALGAPB</b>  | Ral GTPase activating protein, beta subunit (non-catalytic)                           | 82  |   |
| <b>RAP1B</b>    | RAP1B, member of RAS oncogene family                                                  | 85  |   |
| <b>RAP2A</b>    | RAP2A, member of RAS oncogene family                                                  | 70  |   |
| <b>RAPGEF4</b>  | Rap guanine nucleotide exchange factor (GEF) 4                                        | 64  |   |
| <b>RASSF2</b>   | Ras association (RalGDS/AF-6) domain family member 2                                  | 91  |   |
| <b>RASSF6</b>   | Ras association (RalGDS/AF-6) domain family member 6                                  | 76  |   |
| <b>RASSF8</b>   | Ras association (RalGDS/AF-6) domain family (N-terminal) member 8                     | 53  |   |
| <b>RBBP7</b>    | Retinoblastoma binding protein 7                                                      | 70  |   |
| <b>RBM25</b>    | RNA binding motif protein 25                                                          | 86  |   |
| <b>RBM26</b>    | RNA binding motif protein 26                                                          | 74  |   |
| <b>RCOR1</b>    | REST corepressor 1                                                                    | 52  |   |

|                |                                                                     |    |  |
|----------------|---------------------------------------------------------------------|----|--|
| <b>RECK</b>    | Reversion-inducing-cysteine-rich protein with kazal motifs          | 54 |  |
| <b>REEP1</b>   | Receptor accessory protein 1                                        | 52 |  |
| <b>REPS2</b>   | RALBP1 associated Eps domain containing 2                           | 93 |  |
| <b>RFC1</b>    | Replication factor C (activator 1) 1, 145 kDa                       | 80 |  |
| <b>RGPD1</b>   | RANBP2-like and GRIP domain containing 1                            | 84 |  |
| <b>RGS18</b>   | Regulator of G-protein signaling 18                                 | 56 |  |
| <b>RGS5</b>    | Regulator of G-protein signaling 5                                  | 65 |  |
| <b>RIMKLA</b>  | Ribosomal modification protein rimK-like family member A            | 65 |  |
| <b>RIN2</b>    | Ras and Rab interactor 2                                            | 75 |  |
| <b>RLF</b>     | Rearranged L-myc fusion                                             | 93 |  |
| <b>RNF145</b>  | Ring finger protein 145                                             | 69 |  |
| <b>RNF182</b>  | Ring finger protein 182                                             | 64 |  |
| <b>RNF19A</b>  | Ring finger protein 19A                                             | 58 |  |
| <b>RNF34</b>   | Ring finger protein 34                                              | 83 |  |
| <b>RNF6</b>    | Ring finger protein (C3H2C3 type) 6                                 | 65 |  |
| <b>RNF8</b>    | Ring finger protein 8                                               | 81 |  |
| <b>RNMT</b>    | RNA (guanine-7-) methyltransferase                                  | 68 |  |
| <b>ROBO2</b>   | Roundabout, axon guidance receptor, homolog 2 ( <i>Drosophila</i> ) | 68 |  |
| <b>RORA</b>    | RAR-related orphan receptor A                                       | 92 |  |
| <b>RPAP2</b>   | RNA polymerase II associated protein 2                              | 84 |  |
| <b>RPE65</b>   | Retinal pigment epithelium-specific protein 65 kDa                  | 82 |  |
| <b>RPS6KB1</b> | Ribosomal protein S6 kinase, 70 kDa, polypeptide 1                  | 74 |  |
| <b>RRP15</b>   | Ribosomal RNA processing 15 homolog ( <i>S. cerevisiae</i> )        | 70 |  |
| <b>RUFY2</b>   | RUN and FYVE domain containing 2                                    | 54 |  |
| <b>RYR3</b>    | Ryanodine receptor 3                                                | 56 |  |
| <b>S1PR1</b>   | Sphingosine-1-phosphate receptor 1                                  | 98 |  |
| <b>SAMD12</b>  | Sterile $\alpha$ motif domain containing 12                         | 81 |  |
| <b>SAMD9L</b>  | Sterile $\alpha$ motif domain containing 9-like                     | 74 |  |
| <b>SAMHD1</b>  | SAM domain and HD domain 1                                          | 50 |  |
| <b>SCD</b>     | Stearoyl-CoA desaturase ( $\delta$ -9-desaturase)                   | 94 |  |
| <b>SCN9A</b>   | Sodium channel, voltage-gated, type IX, alpha subunit               | 58 |  |
| <b>SCOC</b>    | Short coiled-coil protein                                           | 80 |  |
| <b>SEC24A</b>  | SEC24 family, member A ( <i>S. cerevisiae</i> )                     | 57 |  |

|                 |                                                                                                                  |    |   |
|-----------------|------------------------------------------------------------------------------------------------------------------|----|---|
| <b>SEC24C</b>   | SEC24 family, member C ( <i>S. cerevisiae</i> )                                                                  | 79 |   |
| <b>SEL1L</b>    | Sel-1 suppressor of lin-12-like ( <i>C. elegans</i> )                                                            | 71 |   |
| <b>SELK</b>     | Selenoprotein K                                                                                                  | 51 |   |
| <b>SELT</b>     | Selenoprotein T                                                                                                  | 64 |   |
| <b>SEMA3C</b>   | Sema domain, immunoglobulin domain (Ig), short basic domain, secreted, (semaphorin) 3C                           | 70 |   |
| <b>SEMA4G</b>   | Sema domain, immunoglobulin domain (Ig), transmembrane domain (TM) and short cytoplasmic domain, (semaphorin) 4G | 79 |   |
| <b>SENP1</b>    | SUMO1/sentrin specific peptidase 1                                                                               | 61 |   |
| <b>SEPT8</b>    | Septin 8                                                                                                         | 52 |   |
| <b>SERPINA1</b> | Serpin peptidase inhibitor, clade A ( $\alpha$ -1 antiproteinase, antitrypsin), member 1                         | 51 |   |
| <b>SERPINE1</b> | Serpin peptidase inhibitor, clade E (nexin, plasminogen activator inhibitor type 1), member 1                    | 65 |   |
| <b>SH2B3</b>    | SH2B adaptor protein 3                                                                                           | 51 | v |
| <b>SH2D4A</b>   | SH2 domain containing 4A                                                                                         | 58 |   |
| <b>SH3TC2</b>   | SH3 domain and tetratricopeptide repeats 2                                                                       | 99 |   |
| <b>SHC3</b>     | SHC (Src homology 2 domain containing) transforming protein 3                                                    | 84 |   |
| <b>SHE</b>      | Src homology 2 domain containing E                                                                               | 66 |   |
| <b>SHQ1</b>     | SHQ1 homolog ( <i>S. cerevisiae</i> )                                                                            | 62 |   |
| <b>SIAE</b>     | Sialic acid acetyltransferase                                                                                    | 58 |   |
| <b>SIPA1L2</b>  | Signal-induced proliferation-associated 1 like 2                                                                 | 89 |   |
| <b>SIRT1</b>    | Sirtuin 1                                                                                                        | 79 |   |
| <b>SKP1</b>     | S-phase kinase-associated protein 1                                                                              | 55 |   |
| <b>SLA</b>      | Src-like-adaptor                                                                                                 | 62 |   |
| <b>SLAIN2</b>   | SLAIN motif family, member 2                                                                                     | 64 |   |
| <b>SLC10A7</b>  | Solute carrier family 10 (sodium/bile acid cotransporter family), member 7                                       | 61 |   |
| <b>SLC11A1</b>  | Solute carrier family 11 (proton-coupled divalent metal ion transporters), member 1                              | 68 |   |
| <b>SLC16A6</b>  | Solute carrier family 16, member 6 (monocarboxylic acid transporter 7)                                           | 52 |   |
| <b>SLC19A2</b>  | Solute carrier family 19 (thiamine transporter), member 2                                                        | 78 |   |
| <b>SLC22A15</b> | Solute carrier family 22, member 15                                                                              | 58 |   |
| <b>SLC24A1</b>  | Solute carrier family 24 (sodium/potassium/calcium exchanger), member 1                                          | 73 |   |
| <b>SLC25A24</b> | Solute carrier family 25 (mitochondrial carrier; phosphate carrier), member 24                                   | 78 |   |
| <b>SLC25A25</b> | Solute carrier family 25 (mitochondrial carrier; phosphate carrier), member 25                                   | 57 |   |
| <b>SLC25A32</b> | Solute carrier family 25, member 32                                                                              | 57 |   |
| <b>SLC25A4</b>  | Solute carrier family 25 (mitochondrial carrier; adenine nucleotide translocator), member 4                      | 53 |   |



|                 |                                                                                                                                                          |    |  |
|-----------------|----------------------------------------------------------------------------------------------------------------------------------------------------------|----|--|
| <b>SLC26A4</b>  | Solute carrier family 26, member 4                                                                                                                       | 52 |  |
| <b>SLC2A1</b>   | Solute carrier family 2 (facilitated glucose transporter), member 1                                                                                      | 50 |  |
| <b>SLC35C2</b>  | Solute carrier family 35, member C2                                                                                                                      | 66 |  |
| <b>SLC38A11</b> | Solute carrier family 38, member 11                                                                                                                      | 65 |  |
| <b>SLC38A2</b>  | Solute carrier family 38, member 2                                                                                                                       | 56 |  |
| <b>SLC3A1</b>   | Solute carrier family 3 (cystine, dibasic and neutral amino acid transporters, activator of cystine, dibasic and neutral amino acid transport), member 1 | 50 |  |
| <b>SLC4A10</b>  | Solute carrier family 4, sodium bicarbonate transporter, member 10                                                                                       | 78 |  |
| <b>SLC4A8</b>   | Solute carrier family 4, sodium bicarbonate cotransporter, member 8                                                                                      | 66 |  |
| <b>SLC5A3</b>   | Solute carrier family 5 (sodium/myo-inositol cotransporter), member 3                                                                                    | 63 |  |
| <b>SLC5A8</b>   | Solute carrier family 5 (iodide transporter), member 8                                                                                                   | 60 |  |
| <b>SLC6A2</b>   | Solute carrier family 6 (neurotransmitter transporter, noradrenalin), member 2                                                                           | 61 |  |
| <b>SLC7A11</b>  | Solute carrier family 7 (anionic amino acid transporter light chain, xc- system), member 11                                                              | 85 |  |
| <b>SLC7A2</b>   | Solute carrier family 7 (cationic amino acid transporter, y+ system), member 2                                                                           | 55 |  |
| <b>SLC9A6</b>   | Solute carrier family 9 (sodium/hydrogen exchanger), member 6                                                                                            | 55 |  |
| <b>SLITRK1</b>  | SLIT and NTRK-like family, member 1                                                                                                                      | 83 |  |
| <b>SLK</b>      | STE20-like kinase                                                                                                                                        | 52 |  |
| <b>SMN1</b>     | Survival of motor neuron 1, telomeric                                                                                                                    | 64 |  |
| <b>SMN2</b>     | Survival of motor neuron 2, centromeric                                                                                                                  | 64 |  |
| <b>SNAPC3</b>   | Small nuclear RNA activating complex, polypeptide 3, 50 kDa                                                                                              | 60 |  |
| <b>SNX5</b>     | Sorting nexin 5                                                                                                                                          | 68 |  |
| <b>SOBP</b>     | Sine oculis binding protein homolog (Drosophila)                                                                                                         | 55 |  |
| <b>SOCS4</b>    | Suppressor of cytokine signaling 4                                                                                                                       | 67 |  |
| <b>SORD</b>     | Sorbitol dehydrogenase                                                                                                                                   | 57 |  |
| <b>SOS1</b>     | Son of sevenless homolog 1 (Drosophila)                                                                                                                  | 62 |  |
| <b>SOX5</b>     | SRY (sex determining region Y)-box 5                                                                                                                     | 60 |  |
| <b>SOX6</b>     | SRY (sex determining region Y)-box 6                                                                                                                     | 78 |  |
| <b>SPIN1</b>    | Spindlin 1                                                                                                                                               | 62 |  |
| <b>SPIRE1</b>   | Spire homolog 1 (Drosophila)                                                                                                                             | 53 |  |
| <b>SPOCK1</b>   | Sparc/Osteonectin, cwcv and kazal-like domains proteoglycan (testican) 1                                                                                 | 80 |  |
| <b>SPP1</b>     | Secreted phosphoprotein 1                                                                                                                                | 88 |  |
| <b>SPRY4</b>    | Sprouty homolog 4 (Drosophila)                                                                                                                           | 75 |  |
| <b>SPTLC1</b>   | Serine palmitoyltransferase, long chain base subunit 1                                                                                                   | 62 |  |

|                   |                                                                                                                                               |    |  |
|-------------------|-----------------------------------------------------------------------------------------------------------------------------------------------|----|--|
| <b>SRPK2</b>      | SRSF protein kinase 2                                                                                                                         | 84 |  |
| <b>SRSF7</b>      | Serine/Arginine-rich splicing factor 7                                                                                                        | 84 |  |
| <b>SS18L1</b>     | Synovial sarcoma translocation gene on chromosome 18-like 1                                                                                   | 52 |  |
| <b>SS18L2</b>     | Synovial sarcoma translocation gene on chromosome 18-like 2                                                                                   | 54 |  |
| <b>SSB</b>        | Sjogren syndrome antigen B (autoantigen La)                                                                                                   | 50 |  |
| <b>SSX2IP</b>     | Synovial sarcoma, X breakpoint 2 interacting protein                                                                                          | 65 |  |
| <b>ST6GALNAC3</b> | ST6 ( $\alpha$ - <i>N</i> -acetyl-neuraminyl-2,3- $\beta$ -galactosyl-1,3)- <i>N</i> -acetylgalactosaminide $\alpha$ -2,6-sialyltransferase 3 | 65 |  |
| <b>ST8SIA4</b>    | ST8 $\alpha$ - <i>N</i> -acetyl-neuraminide $\alpha$ -2,8-sialyltransferase 4                                                                 | 82 |  |
| <b>STARD4</b>     | StAR-related lipid transfer (START) domain containing 4                                                                                       | 68 |  |
| <b>STC1</b>       | Stanniocalcin 1                                                                                                                               | 65 |  |
| <b>STC2</b>       | Stanniocalcin 2                                                                                                                               | 60 |  |
| <b>STEAP4</b>     | STEAP family member 4                                                                                                                         | 61 |  |
| <b>STRN</b>       | Striatin, calmodulin binding protein                                                                                                          | 60 |  |
| <b>STS</b>        | Steroid sulfatase (microsomal), isozyme S                                                                                                     | 55 |  |
| <b>STX7</b>       | Syntaxin 7                                                                                                                                    | 73 |  |
| <b>STXBP5</b>     | Syntaxin binding protein 5 (tomosyn)                                                                                                          | 70 |  |
| <b>SUCLG2</b>     | Succinate-CoA ligase, GDP-forming, $\beta$ subunit                                                                                            | 81 |  |
| <b>SUDS3</b>      | Suppressor of defective silencing 3 homolog ( <i>S. cerevisiae</i> )                                                                          | 56 |  |
| <b>SUGP2</b>      | SURP and G patch domain containing 2                                                                                                          | 53 |  |
| <b>SULT1C2</b>    | Sulfotransferase family, cytosolic, 1C, member 2                                                                                              | 58 |  |
| <b>SVIP</b>       | Small VCP/p97-interacting protein                                                                                                             | 70 |  |
| <b>SYNE1</b>      | Spectrin repeat containing, nuclear envelope 1                                                                                                | 88 |  |
| <b>SYNPO2</b>     | Synaptopodin 2                                                                                                                                | 66 |  |
| <b>SYNPR</b>      | Synaptoporin                                                                                                                                  | 66 |  |
| <b>SYT15</b>      | Synaptotagmin XV                                                                                                                              | 64 |  |
| <b>TADA1</b>      | Transcriptional adaptor 1                                                                                                                     | 59 |  |
| <b>TADA2B</b>     | Transcriptional adaptor 2B                                                                                                                    | 81 |  |
| <b>TAF1A</b>      | TATA box binding protein (TBP)-associated factor, RNA polymerase I, A, 48 kDa                                                                 | 56 |  |
| <b>TAF5L</b>      | TAF5-like RNA polymerase II, p300/CBP-associated factor (PCAF)-associated factor, 65 kDa                                                      | 50 |  |
| <b>TAP2</b>       | Transporter 2, ATP-binding cassette, sub-family B (MDR/TAP)                                                                                   | 57 |  |
| <b>TARDBP</b>     | TAR DNA binding protein                                                                                                                       | 62 |  |

|                 |                                                                  |    |   |
|-----------------|------------------------------------------------------------------|----|---|
| <b>TBC1D1</b>   | TBC1 (tre-2/USP6, BUB2, cdc16) domain family, member 1           | 89 |   |
| <b>TBC1D14</b>  | TBC1 domain family, member 14                                    | 53 |   |
| <b>TBC1D24</b>  | TBC1 domain family, member 24                                    | 66 |   |
| <b>TBC1D4</b>   | TBC1 domain family, member 4                                     | 87 |   |
| <b>TBCD</b>     | Tubulin folding cofactor D                                       | 57 |   |
| <b>TBCEL</b>    | Tubulin folding cofactor E-like                                  | 56 |   |
| <b>TBL1X</b>    | Transducin ( $\beta$ )-like 1X-linked                            | 91 |   |
| <b>TBL1XR1</b>  | Transducin ( $\beta$ )-like 1 X-linked receptor 1                | 88 |   |
| <b>TBPL1</b>    | TBP-like 1                                                       | 69 |   |
| <b>TBXA2R</b>   | Thromboxane A2 receptor                                          | 60 |   |
| <b>TCERG1</b>   | Transcription elongation regulator 1                             | 94 |   |
| <b>TCF7L2</b>   | Transcription factor 7-like 2 (T-cell specific, HMG-box)         | 61 | v |
| <b>TDRD6</b>    | Tudor domain containing 6                                        | 58 |   |
| <b>TET2</b>     | Tet methylcytosine dioxygenase 2                                 | 92 | v |
| <b>TFEC</b>     | Transcription factor EC                                          | 72 |   |
| <b>TFRC</b>     | Transferrin receptor (p90, CD71)                                 | 84 | v |
| <b>TGFBI</b>    | Transforming growth factor, beta-induced, 68 kDa                 | 65 |   |
| <b>TGFBRI</b>   | Transforming growth factor, beta receptor 1                      | 73 |   |
| <b>TGFBRAP1</b> | Transforming growth factor, beta receptor associated protein 1   | 75 |   |
| <b>THAP2</b>    | THAP domain containing, apoptosis associated protein 2           | 62 |   |
| <b>THOC7</b>    | THO complex 7 homolog (Drosophila)                               | 65 |   |
| <b>TIA1</b>     | TIA1 cytotoxic granule-associated RNA binding protein            | 68 |   |
| <b>TIFA</b>     | TRAF-interacting protein with forkhead-associated domain         | 89 |   |
| <b>TIMELESS</b> | Timeless homolog (Drosophila)                                    | 57 |   |
| <b>TIMM17A</b>  | Translocase of inner mitochondrial membrane 17 homolog A (yeast) | 57 |   |
| <b>TIMP3</b>    | TIMP metalloproteinase inhibitor 3                               | 71 |   |
| <b>TLL1</b>     | Tolloid-like 1                                                   | 73 |   |
| <b>TLR4</b>     | Toll-like receptor 4                                             | 66 |   |
| <b>TM9SF3</b>   | Transmembrane 9 superfamily member 3                             | 91 |   |
| <b>TMEM106B</b> | Transmembrane protein 106B                                       | 78 |   |
| <b>TMEM131</b>  | Transmembrane protein 131                                        | 86 |   |
| <b>TMEM135</b>  | Transmembrane protein 135                                        | 63 |   |
| <b>TMEM14A</b>  | Transmembrane protein 14A                                        | 53 |   |

|                    |                                                              |    |   |
|--------------------|--------------------------------------------------------------|----|---|
| <b>TMEM165</b>     | Transmembrane protein 165                                    | 83 |   |
| <b>TMEM181</b>     | Transmembrane protein 181                                    | 69 |   |
| <b>TMEM184C</b>    | Transmembrane protein 184C                                   | 56 |   |
| <b>TMEM194A</b>    | Transmembrane protein 194A                                   | 71 |   |
| <b>TMEM196</b>     | Transmembrane protein 196                                    | 72 |   |
| <b>TMEM207</b>     | Transmembrane protein 207                                    | 61 |   |
| <b>TMEM242</b>     | Transmembrane protein 242                                    | 59 |   |
| <b>TMEM26</b>      | Transmembrane protein 26                                     | 78 |   |
| <b>TMEM27</b>      | Transmembrane protein 27                                     | 70 |   |
| <b>TMEM33</b>      | Transmembrane protein 33                                     | 72 |   |
| <b>TMEM48</b>      | Transmembrane protein 48                                     | 67 |   |
| <b>TMEM64</b>      | Transmembrane protein 64                                     | 57 |   |
| <b>TMEM87B</b>     | Transmembrane protein 87B                                    | 98 |   |
| <b>TMF1</b>        | TATA element modulatory factor 1                             | 80 |   |
| <b>TMPRSS11BNL</b> | TMPRSS11B N terminal-like                                    | 59 |   |
| <b>TMPRSS2</b>     | Transmembrane protease, serine 2                             | 70 | v |
| <b>TNF</b>         | Tumor necrosis factor                                        | 80 |   |
| <b>TNFAIP1</b>     | Tumor necrosis factor, alpha-induced protein 1 (endothelial) | 61 |   |
| <b>TNFAIP6</b>     | Tumor necrosis factor, $\alpha$ -induced protein 6           | 62 |   |
| <b>TNFRSF10B</b>   | Tumor necrosis factor receptor superfamily, member 10b       | 57 |   |
| <b>TNFRSF11B</b>   | Tumor necrosis factor receptor superfamily, member 11b       | 74 |   |
| <b>TNFSF4</b>      | Tumor necrosis factor (ligand) superfamily, member 4         | 86 |   |
| <b>TNPO1</b>       | Transportin 1                                                | 99 |   |
| <b>TNRC6B</b>      | Trinucleotide repeat containing 6B                           | 76 |   |
| <b>TNS3</b>        | Tensin 3                                                     | 51 |   |
| <b>TOM1L1</b>      | Target of myb1 (chicken)-like 1                              | 84 |   |
| <b>TOR1AIP2</b>    | Torsin A interacting protein 2                               | 86 |   |
| <b>TOX</b>         | Thymocyte selection-associated high mobility group box       | 76 |   |
| <b>TP63</b>        | Tumor protein p63                                            | 53 |   |
| <b>TPRX1</b>       | Tetra-peptide repeat homeobox 1                              | 82 |   |
| <b>TRAK1</b>       | Trafficking protein, kinesin binding 1                       | 76 |   |
| <b>TRDMT1</b>      | tRNA aspartic acid methyltransferase 1                       | 85 |   |

|                |                                                                     |    |   |
|----------------|---------------------------------------------------------------------|----|---|
| <b>TRDN</b>    | Triadin                                                             | 60 |   |
| <b>TREML4</b>  | Triggering receptor expressed on myeloid cells-like 4               | 72 |   |
| <b>TRIM2</b>   | Tripartite motif containing 2                                       | 91 |   |
| <b>TRIM71</b>  | Tripartite motif containing 71                                      | 58 |   |
| <b>TRNP1</b>   | TMF1-regulated nuclear protein 1                                    | 50 |   |
| <b>TRPM3</b>   | Transient receptor potential cation channel, subfamily M, member 3  | 57 |   |
| <b>TSC22D2</b> | TSC22 domain family, member 2                                       | 61 |   |
| <b>TSPAN8</b>  | Tetraspanin 8                                                       | 78 |   |
| <b>TSPYL4</b>  | TSPY-like 4                                                         | 71 |   |
| <b>TTC39B</b>  | Tetratricopeptide repeat domain 39B                                 | 58 |   |
| <b>TWISTNB</b> | TWIST neighbor                                                      | 54 |   |
| <b>TXNDC15</b> | Thioredoxin domain containing 15                                    | 89 |   |
| <b>UBE2A</b>   | Ubiquitin-conjugating enzyme E2A                                    | 72 |   |
| <b>UBE2B</b>   | Ubiquitin-conjugating enzyme E2B                                    | 69 |   |
| <b>UBE2D1</b>  | Ubiquitin-conjugating enzyme E2D 1                                  | 80 |   |
| <b>UBL3</b>    | Ubiquitin-like 3                                                    | 63 |   |
| <b>UBP1</b>    | Upstream binding protein 1 (LBP-1a)                                 | 86 |   |
| <b>UNC80</b>   | Unc-80 homolog ( <i>C. elegans</i> )                                | 63 |   |
| <b>USO1</b>    | USO1 vesicle docking protein homolog (yeast)                        | 53 |   |
| <b>USP31</b>   | Ubiquitin specific peptidase 31                                     | 50 |   |
| <b>USP33</b>   | Ubiquitin specific peptidase 33                                     | 77 |   |
| <b>USP42</b>   | Ubiquitin specific peptidase 42                                     | 74 |   |
| <b>USP9Y</b>   | Ubiquitin specific peptidase 9, Y-linked                            | 57 |   |
| <b>VANGL1</b>  | Vang-like 1 (van gogh, <i>Drosophila</i> )                          | 54 |   |
| <b>VBP1</b>    | Von Hippel-Lindau binding protein 1                                 | 72 |   |
| <b>VCAN</b>    | Versican                                                            | 55 |   |
| <b>VCX</b>     | Variable charge, X-linked                                           | 59 |   |
| <b>VCX3A</b>   | Variable charge, X-linked 3A                                        | 59 |   |
| <b>VCX3B</b>   | Variable charge, X-linked 3B                                        | 61 |   |
| <b>VCY1B</b>   | Variable charge, Y-linked 1B                                        | 73 |   |
| <b>VHL</b>     | Von Hippel-Lindau tumor suppressor                                  | 64 | v |
| <b>VIP</b>     | Vasoactive intestinal peptide                                       | 58 |   |
| <b>VPS13A</b>  | Vacuolar protein sorting 13 homolog A ( <i>S. cerevisiae</i> )+B986 | 57 |   |

|                |                                                                                           |    |   |
|----------------|-------------------------------------------------------------------------------------------|----|---|
| <b>VPS13C</b>  | Vacuolar protein sorting 13 homolog C ( <i>S. cerevisiae</i> )                            | 52 |   |
| <b>VTI1A</b>   | Vesicle transport through interaction with t-SNAREs homolog 1A (yeast)                    | 50 | v |
| <b>WASL</b>    | Wiskott-Aldrich syndrome-like                                                             | 51 |   |
| <b>WDFY3</b>   | WD repeat and FYVE domain containing 3                                                    | 65 |   |
| <b>WDR36</b>   | WD repeat domain 36                                                                       | 54 |   |
| <b>WDYHV1</b>  | WDYHV motif containing 1                                                                  | 50 |   |
| <b>WHAMM</b>   | WAS protein homolog associated with actin, golgi membranes and microtubules               | 63 |   |
| <b>WHSC2</b>   | Wolf-Hirschhorn syndrome candidate 2                                                      | 79 |   |
| <b>WIF1</b>    | WNT inhibitory factor 1                                                                   | 51 | v |
| <b>WNK1</b>    | WNK lysine deficient protein kinase 1                                                     | 65 |   |
| <b>WNT16</b>   | Wingless-type MMTV integration site family, member 16                                     | 55 |   |
| <b>WSCD1</b>   | WSC domain containing 1                                                                   | 58 |   |
| <b>XPO7</b>    | Exportin 7                                                                                | 61 |   |
| <b>XRN1</b>    | 5'-3' exoribonuclease 1                                                                   | 76 |   |
| <b>XRRA1</b>   | X-ray radiation resistance associated 1                                                   | 57 |   |
| <b>YLPM1</b>   | YLP motif containing 1                                                                    | 69 |   |
| <b>YPEL1</b>   | Yippee-like 1 ( <i>Drosophila</i> )                                                       | 66 |   |
| <b>YTHDC1</b>  | YTH domain containing 1                                                                   | 70 |   |
| <b>YTHDC2</b>  | YTH domain containing 2                                                                   | 58 |   |
| <b>YWHAG</b>   | Tyrosine 3-monooxygenase/tryptophan 5-monooxygenase activation protein, gamma polypeptide | 53 |   |
| <b>ZAK</b>     | Sterile alpha motif and leucine zipper containing kinase AZK                              | 64 |   |
| <b>ZBTB34</b>  | Zinc finger and BTB domain containing 34                                                  | 64 |   |
| <b>ZBTB4</b>   | Zinc finger and BTB domain containing 4                                                   | 76 |   |
| <b>ZBTB43</b>  | Zinc finger and BTB domain containing 43                                                  | 80 |   |
| <b>ZBTB44</b>  | Zinc finger and BTB domain containing 44                                                  | 78 |   |
| <b>ZC3H6</b>   | Zinc finger CCCH-type containing 6                                                        | 75 |   |
| <b>ZDHHC21</b> | Zinc finger, DHHC-type containing 21                                                      | 76 |   |
| <b>ZDHHC3</b>  | Zinc finger, DHHC-type containing 3                                                       | 51 |   |
| <b>ZEB2</b>    | Zinc finger E-box binding homeobox 2                                                      | 68 |   |
| <b>ZFAND4</b>  | Zinc finger, AN1-type domain 4                                                            | 63 |   |
| <b>ZFAND6</b>  | Zinc finger, AN1-type domain 6                                                            | 82 |   |
| <b>ZFP14</b>   | Zinc finger protein 14 homolog (mouse)                                                    | 93 |   |

|                |                                         |     |  |
|----------------|-----------------------------------------|-----|--|
| <b>ZFP28</b>   | Zinc finger protein 28 homolog (mouse)  | 52  |  |
| <b>ZFP36L1</b> | Zinc finger protein 36, C3H type-like 1 | 70  |  |
| <b>ZFP36L2</b> | Zinc finger protein 36, C3H type-like 2 | 85  |  |
| <b>ZFP62</b>   | Zinc finger protein 62 homolog (mouse)  | 56  |  |
| <b>ZFP82</b>   | Zinc finger protein 82 homolog (mouse)  | 51  |  |
| <b>ZFP91</b>   | Zinc finger protein 91 homolog (mouse)  | 62  |  |
| <b>ZFYVE16</b> | Zinc finger, FYVE domain containing 16  | 63  |  |
| <b>ZFYVE26</b> | Zinc finger, FYVE domain containing 26  | 50  |  |
| <b>ZIC2</b>    | Zic family member 2                     | 55  |  |
| <b>ZIC3</b>    | Zic family member 3                     | 80  |  |
| <b>ZMYND11</b> | Zinc finger, MYND-type containing 11    | 70  |  |
| <b>ZNF124</b>  | Zinc finger protein 124                 | 77  |  |
| <b>ZNF136</b>  | Zinc finger protein 136                 | 63  |  |
| <b>ZNF14</b>   | Zinc finger protein 14                  | 64  |  |
| <b>ZNF140</b>  | Zinc finger protein 140                 | 55  |  |
| <b>ZNF181</b>  | Zinc finger protein 181                 | 79  |  |
| <b>ZNF20</b>   | Zinc finger protein 20                  | 56  |  |
| <b>ZNF217</b>  | Zinc finger protein 217                 | 57  |  |
| <b>ZNF266</b>  | Zinc finger protein 266                 | 72  |  |
| <b>ZNF268</b>  | Zinc finger protein 268                 | 97  |  |
| <b>ZNF277</b>  | Zinc finger protein 277                 | 57  |  |
| <b>ZNF28</b>   | Zinc finger protein 28                  | 63  |  |
| <b>ZNF280D</b> | Zinc finger protein 280D                | 73  |  |
| <b>ZNF326</b>  | Zinc finger protein 326                 | 61  |  |
| <b>ZNF329</b>  | Zinc finger protein 329                 | 77  |  |
| <b>ZNF37A</b>  | Zinc finger protein 37A                 | 62  |  |
| <b>ZNF382</b>  | Zinc finger protein 382                 | 54  |  |
| <b>ZNF396</b>  | Zinc finger protein 396                 | 78  |  |
| <b>ZNF439</b>  | Zinc finger protein 439                 | 100 |  |
| <b>ZNF44</b>   | Zinc finger protein 44                  | 52  |  |
| <b>ZNF440</b>  | Zinc finger protein 440                 | 95  |  |
| <b>ZNF441</b>  | Zinc finger protein 441                 | 78  |  |
| <b>ZNF454</b>  | Zinc finger protein 454                 | 78  |  |

|                |                               |     |  |
|----------------|-------------------------------|-----|--|
| <b>ZNF468</b>  | Zinc finger protein 468       | 87  |  |
| <b>ZNF479</b>  | Zinc finger protein 479       | 71  |  |
| <b>ZNF514</b>  | Zinc finger protein 514       | 86  |  |
| <b>ZNF527</b>  | Zinc finger protein 527       | 51  |  |
| <b>ZNF544</b>  | Znc finger protein 544        | 69  |  |
| <b>ZNF555</b>  | Zinc finger protein 555       | 55  |  |
| <b>ZNF559</b>  | Zinc finger protein 559       | 98  |  |
| <b>ZNF562</b>  | Zinc finger protein 562       | 69  |  |
| <b>ZNF563</b>  | Zinc finger protein 563       | 88  |  |
| <b>ZNF568</b>  | Zinc finger protein 568       | 64  |  |
| <b>ZNF586</b>  | Zinc finger protein 586       | 84  |  |
| <b>ZNF592</b>  | Zinc finger protein 592       | 53  |  |
| <b>ZNF594</b>  | Zinc finger protein 594       | 100 |  |
| <b>ZNF606</b>  | Zinc finger protein 606       | 60  |  |
| <b>ZNF615</b>  | Zinc finger protein 615       | 51  |  |
| <b>ZNF626</b>  | Zinc finger protein 626       | 51  |  |
| <b>ZNF654</b>  | Zinc finger protein 654       | 67  |  |
| <b>ZNF655</b>  | Zinc finger protein 655       | 80  |  |
| <b>ZNF673</b>  | Zinc finger family member 673 | 80  |  |
| <b>ZNF674</b>  | Zinc finger protein 674       | 60  |  |
| <b>ZNF677</b>  | Zinc finger protein 677       | 67  |  |
| <b>ZNF700</b>  | Zinc finger protein 700       | 75  |  |
| <b>ZNF704</b>  | Zinc finger protein 704       | 92  |  |
| <b>ZNF74</b>   | Zinc finger protein 74        | 55  |  |
| <b>ZNF780A</b> | Zinc finger protein 780A      | 80  |  |
| <b>ZNF780B</b> | Zinc finger protein 780B      | 97  |  |
| <b>ZNF781</b>  | Zinc finger protein 781       | 99  |  |
| <b>ZNF800</b>  | Zinc finger protein 800       | 59  |  |
| <b>ZNF814</b>  | Zinc finger protein 814       | 87  |  |
| <b>ZNF823</b>  | Zinc finger protein 823       | 69  |  |
| <b>ZNF83</b>   | Zinc finger protein 83        | 80  |  |
| <b>ZNF844</b>  | Zinc finger protein 844       | 98  |  |
| <b>ZNF850</b>  | Zinc finger protein 850       | 66  |  |



|                |                                              |    |  |
|----------------|----------------------------------------------|----|--|
| <b>ZNRF2</b>   | Zinc and ring finger 2                       | 54 |  |
| <b>ZRANB1</b>  | Zinc finger, RAN-binding domain containing 1 | 55 |  |
| <b>ZSCAN23</b> | Zinc finger and SCAN domain containing 23    | 88 |  |
| <b>ZXDC</b>    | ZXD family zinc finger C                     | 92 |  |

**Supplementary Table 4. Predicted targets of hsa-miR-181a-5p by miRanda microT v5.0 that are cancer genes.**

| <b>Gene symbol</b> | <b>Full nmae</b>                                                           |
|--------------------|----------------------------------------------------------------------------|
| ABI1               | Abl-interactor 1                                                           |
| ABL1               | ABL proto-oncogene 1, non-receptor tyrosine kinase                         |
| ABL2               | ABL proto-oncogene 2, non-receptor tyrosine kinase                         |
| AKAP9              | A kinase (PRKA) anchor protein 9                                           |
| AKT2               | V-akt murine thymoma viral oncogene homolog 2                              |
| APC                | Adenomatous polyposis coli                                                 |
| ARHGEF12           | Rho guanine nucleotide exchange factor (GEF) 12                            |
| ARID2              | AT rich interactive domain 2                                               |
| ARNT               | Aryl hydrocarbon receptor nuclear translocator                             |
| ATF1               | Activating transcription factor 1                                          |
| ATM                | ATM serine/threonine kinase                                                |
| ATP2B3             | ATPase, Ca <sup>++</sup> transporting, plasma membrane 3                   |
| ATRX               | $\alpha$ -Thalassemia/mental retardation syndrome X-linked                 |
| BAP1               | BRCA1 associated protein-1 (ubiquitin carboxy-terminal hydrolase)          |
| BCL2               | B-cell CLL/lymphoma 2                                                      |
| BCL6               | B-cell CLL/lymphoma 6                                                      |
| BCL7A              | B-cell CLL/lymphoma 7A                                                     |
| BCL9               | B-cell CLL/lymphoma 9                                                      |
| BCOR               | BCL6 corepressor                                                           |
| BCR                | Breakpoint cluster region                                                  |
| BRCA1              | Breast cancer 1, early onset                                               |
| BTG1               | B-cell translocation gene 1, anti-proliferative                            |
| C16orf75           | RMI2, RecQ mediated genome instability 2, homolog ( <i>S. cerevisiae</i> ) |
| CALR               | Calreticulin                                                               |
| CAMTA1             | Calmodulin binding transcription activator 1                               |
| CANT1              | Calcium activated nucleotidase 1                                           |
| CARD11             | Caspase recruitment domain family, member 11                               |
| CASP8              | Caspase 8, apoptosis-related cysteine peptidase                            |
| CBFA2T3            | Core-binding factor, runt domain, alpha subunit 2; translocated to, 3      |
| CBL                | Cbl proto-oncogene, E3 ubiquitin protein ligase                            |

|         |                                                          |
|---------|----------------------------------------------------------|
| CBLB    | Cbl proto-oncogene B, E3 ubiquitin protein ligase        |
| CCDC6   | Coiled-coil domain containing 6                          |
| CCNE1   | Cyclin E1                                                |
| CD274   | CD274 molecule                                           |
| CDC73   | Cell division cycle 73                                   |
| CDH1    | Cadherin 1, type 1, E-cadherin (epithelial)              |
| CDK6    | Cyclin-dependent kinase 6                                |
| CDX2    | Caudal type homeobox 2                                   |
| CEBPA   | CCAAT/enhancer binding protein (C/EBP), $\alpha$         |
| CHCHD7  | Coiled-coil-helix-coiled-coil-helix domain containing 7  |
| CHN1    | Chimerin 1                                               |
| CLTC    | Clathrin, heavy chain (Hc)                               |
| CREB1   | cAMP responsive element binding protein 1                |
| CREB3L2 | cAMP responsive element binding protein 3-like 2         |
| CREBBP  | CREB binding protein                                     |
| CRTC3   | CREB regulated transcription coactivator 3               |
| CTNNB1  | Catenin (cadherin-associated protein), $\beta$ 1, 88 kDa |
| CYLD    | Cylindromatosis (turban tumor syndrome)                  |
| DAXX    | Death-domain associated protein                          |
| DDX10   | DEAD (Asp-Glu-Ala-Asp) box polypeptide 10                |
| DDX5    | DEAD (Asp-Glu-Ala-Asp) box helicase 5                    |
| DEK     | DEK proto-oncogene                                       |
| DICER1  | Dicer 1, ribonuclease type III                           |
| DNM2    | Dynamin 2                                                |
| ECT2L   | Epithelial cell transforming 2 like                      |
| EGFR    | Epidermal growth factor receptor                         |
| EIF4A2  | Eukaryotic translation initiation factor 4A2             |
| EML4    | Echinoderm microtubule associated protein like 4         |
| EPS15   | Epidermal growth factor receptor pathway substrate 15    |
| ERG     | V-ets avian erythroblastosis virus E26 oncogene homolog  |
| ETV1    | Ets variant 1                                            |
| ETV6    | Ets variant 6                                            |
| EXT2    | Exostosin glycosyltransferase 2                          |

|           |                                                                                                |
|-----------|------------------------------------------------------------------------------------------------|
| EZH2      | Enhancer of zeste 2 polycomb repressive complex 2 subunit                                      |
| FAM46C    | Family with sequence similarity 46, member C                                                   |
| FANCA     | Fanconi anemia, complementation group A                                                        |
| FANCD2    | Fanconi anemia, complementation group D2                                                       |
| FANCF     | Fanconi anemia, complementation group F                                                        |
| FANCG     | Fanconi anemia, complementation group G                                                        |
| FAS       | Fas cell surface death receptor                                                                |
| FBXO11    | F-box protein 11                                                                               |
| FGFR1     | Fibroblast growth factor receptor 1                                                            |
| FGFR1OP   | FGFR1 oncogene partner                                                                         |
| FGFR2     | Fibroblast growth factor receptor 2                                                            |
| FGFR3     | Fibroblast growth factor receptor 3                                                            |
| FLT3      | Fms-related tyrosine kinase 3                                                                  |
| FNBP1     | Formin binding protein 1                                                                       |
| FOXP1     | Forkhead box P1                                                                                |
| STL3      | Follistatin-like 3 (secreted glycoprotein)                                                     |
| FUS       | FUS RNA binding protein                                                                        |
| GAS7      | Growth arrest-specific 7                                                                       |
| GATA2     | GATA binding protein 2                                                                         |
| GNAS      | GNAS complex locus                                                                             |
| GOPC      | Golgi-associated PDZ and coiled-coil motif containing                                          |
| H3F3B     | H3 histone, family 3B (H3.3B)                                                                  |
| HERPUD1   | Homocysteine-inducible, endoplasmic reticulum stress-inducible, ubiquitin-like domain member 1 |
| HEY1      | Hes-related family bHLH transcription factor with YRPW motif 1                                 |
| HLF       | Hepatic leukemia factor                                                                        |
| HMGA2     | High mobility group AT-hook 2                                                                  |
| HNRNPA2B1 | Heterogeneous nuclear ribonucleoprotein A2/B1                                                  |
| HOOK3     | Hook microtubule-tethering protein 3                                                           |
| HOXA11    | Homeobox A11                                                                                   |
| HOXC11    | Homeobox C11                                                                                   |
| HOXC13    | Homeobox C13                                                                                   |

|          |                                                                             |
|----------|-----------------------------------------------------------------------------|
| IDH1     | Isocitrate dehydrogenase 1 (NADP <sup>+</sup> ), soluble                    |
| IGL@     | Immunoglobulin lambda locus                                                 |
| IL2      | Interleukin 2                                                               |
| IL21R    | Interleukin 21 receptor                                                     |
| IL6ST    | Interleukin 6 signal transducer                                             |
| IL7R     | Interleukin 7 receptor                                                      |
| IRF4     | Interferon regulatory factor 4                                              |
| JAK2     | Janus kinase 2                                                              |
| JAZF1    | JAZF zinc finger 1                                                          |
| JUN      | Jun proto-oncogene                                                          |
| KCNJ5    | Potassium inwardly-rectifying channel, subfamily J, member 5                |
| KDM5A    | Lysine (K)-specific demethylase 5A                                          |
| KDM5C    | Lysine (K)-specific demethylase 5C                                          |
| KDM6A    | Lysine (K)-specific demethylase 6A                                          |
| KDR      | Kinase insert domain receptor (a type III receptor tyrosine kinase)         |
| KIAA1549 | KIAA1549                                                                    |
| KLK2     | Kallikrein-related peptidase 2                                              |
| KRAS     | Kirsten rat sarcoma viral oncogene homolog                                  |
| LASP1    | LIM and SH3 protein 1                                                       |
| LCP1     | Lymphocyte cytosolic protein 1 (L-plastin)                                  |
| LIFR     | Leukemia inhibitory factor receptor $\alpha$                                |
| LMO1     | LIM domain only 1 (rhombotin 1)                                             |
| LPP      | LIM domain containing preferred translocation partner in lipoma             |
| MAF      | V-maf avian musculoaponeurotic fibrosarcoma oncogene homolog                |
| MAFB     | V-maf avian musculoaponeurotic fibrosarcoma oncogene homolog B              |
| MALAT1   | Metastasis associated lung adenocarcinoma transcript 1 (non-protein coding) |
| MALT1    | Mucosa associated lymphoid tissue lymphoma translocation gene 1             |
| MAP2K1   | Mitogen-activated protein kinase kinase 1                                   |
| MAP2K4   | Mitogen-activated protein kinase kinase 4                                   |
| MDM2     | MDM2 proto-oncogene, E3 ubiquitin protein ligase                            |
| MDM4     | MDM4, p53 regulator                                                         |
| MDS2     | Myelodysplastic syndrome 2 translocation associated                         |

|          |                                                                                                 |
|----------|-------------------------------------------------------------------------------------------------|
| MET      | MET proto-oncogene, receptor tyrosine kinase                                                    |
| MITF     | Microphthalmia-associated transcription factor                                                  |
| MKL1     | Megakaryoblastic leukemia (translocation) 1                                                     |
| MLF1     | Myeloid leukemia factor 1                                                                       |
| MLH1     | MutL homolog 1                                                                                  |
| MLL      | Myeloid/lymphoid or mixed-lineage leukemia (trithorax homolog, Drosophila)                      |
| MLL3     | Myeloid/lymphoid or mixed-lineage leukemia 3                                                    |
| MLLT10   | Myeloid/lymphoid or mixed-lineage leukemia (trithorax homolog, Drosophila); translocated to, 10 |
| MLLT3    | Myeloid/lymphoid or mixed-lineage leukemia (trithorax homolog, Drosophila); translocated to, 3  |
| MLLT4    | Myeloid/lymphoid or mixed-lineage leukemia (trithorax homolog, Drosophila); translocated to, 4  |
| MLLT6    | Myeloid/lymphoid or mixed-lineage leukemia (trithorax homolog, Drosophila); translocated to, 6  |
| MN1      | Meningioma (disrupted in balanced translocation) 1                                              |
| MPL      | MPL proto-oncogene, thrombopoietin receptor                                                     |
| MSH2     | MutS homolog 2                                                                                  |
| MSI2     | Musashi RNA-binding protein 2                                                                   |
| MYB      | V-myb avian myeloblastosis viral oncogene homolog                                               |
| MYCN     | V-myc avian myelocytomatosis viral oncogene neuroblastoma derived homolog                       |
| MYH11    | Myosin, heavy chain 11, smooth muscle                                                           |
| NCOA1    | Nuclear receptor coactivator 1                                                                  |
| NCOA2    | Nuclear receptor coactivator 2                                                                  |
| NF1      | Neurofibromin 1                                                                                 |
| NF2      | Neurofibromin 2 (merlin)                                                                        |
| NFE2L2   | Nuclear factor, erythroid 2-like 2                                                              |
| NFIB     | Nuclear factor I/B                                                                              |
| NIN      | Ninein (GSK3B interacting protein)                                                              |
| NOTCH2   | Notch 2                                                                                         |
| NPM1     | Nucleophosmin (nucleolar phosphoprotein B23, numatrin)                                          |
| NR4A3    | Nuclear receptor subfamily 4, group A, member 3                                                 |
| NRAS     | Neuroblastoma RAS viral (v-ras) oncogene homolog                                                |
| NSD1     | Nuclear receptor binding SET domain protein 1                                                   |
| NT5C2    | 5'-Nucleotidase, cytosolic II                                                                   |
| NUP98    | Nucleoporin 98 kDa                                                                              |
| PAFAH1B2 | Platelet-activating factor acetylhydrolase 1b, catalytic subunit 2 (30 kDa)                     |

|          |                                                                                         |
|----------|-----------------------------------------------------------------------------------------|
| PAX3     | Paired box 3                                                                            |
| PAX5     | Paired box 5                                                                            |
| PAX7     | Paired box 7                                                                            |
| PBRM1    | Polybromo 1                                                                             |
| PBX1     | Pre-B-cell leukemia homeobox 1                                                          |
| PDE4DIP  | Phosphodiesterase 4D interacting protein                                                |
| PDGFRA   | Platelet-derived growth factor receptor, $\alpha$ polypeptide                           |
| PDGFRB   | Platelet-derived growth factor receptor, $\beta$ polypeptide                            |
| PHF6     | PHD finger protein 6                                                                    |
| PHOX2B   | Paired-like homeobox 2b                                                                 |
| PICALM   | Phosphatidylinositol binding clathrin assembly protein                                  |
| PIK3R1   | Phosphoinositide-3-kinase, regulatory subunit 1 ( $\alpha$ )                            |
| PLAG1    | Pleiomorphic adenoma gene 1                                                             |
| PML      | Promyelocytic leukemia                                                                  |
| PMS1     | PMS1 postmeiotic segregation increased 1 ( <i>S. cerevisiae</i> )                       |
| PPARG    | Peroxisome proliferator-activated receptor gamma                                        |
| PRDM1    | PR domain containing 1, with ZNF domain                                                 |
| PTEN     | Phosphatase and tensin homolog                                                          |
| PTPRC    | Protein tyrosine phosphatase, receptor type, C                                          |
| RAC1     | Ras-related C3 botulinum toxin substrate 1 (rho family, small GTP binding protein Rac1) |
| RAD21    | RAD21 homolog ( <i>S. pombe</i> )                                                       |
| RALGDS   | Ral guanine nucleotide dissociation stimulator                                          |
| RANBP17  | RAN binding protein 17                                                                  |
| RAP1GDS1 | RAP1, GTP-GDP dissociation stimulator 1                                                 |
| RB1      | Retinoblastoma 1                                                                        |
| RNF43    | Ring finger protein 43                                                                  |
| RPL5     | Ribosomal protein L5                                                                    |
| RUNX1    | Runt-related transcription factor 1                                                     |
| SDC4     | Syndecan 4                                                                              |
| SETBP1   | SET binding protein 1                                                                   |
| SF3B1    | Splicing factor 3b, subunit 1, 155 kDa                                                  |
| SH2B3    | SH2B adaptor protein 3                                                                  |
| SLC34A2  | Solute carrier family 34 (type II sodium/phosphate cotransporter), member 2             |

|         |                                                                                                   |
|---------|---------------------------------------------------------------------------------------------------|
| SMARCA4 | SWI/SNF related, matrix associated, actin dependent regulator of chromatin, subfamily a, member 4 |
| SMARCE1 | SWI/SNF related, matrix associated, actin dependent regulator of chromatin, subfamily e, member 1 |
| SRGAP3  | SLIT-ROBO Rho GTPase activating protein 3                                                         |
| SS18L1  | Synovial sarcoma translocation gene on chromosome 18-like 1                                       |
| STAT3   | Signal transducer and activator of transcription 3 (acute-phase response factor)                  |
| SUFU    | Suppressor of fused homolog (Drosophila)                                                          |
| SUZ12   | SUZ12 polycomb repressive complex 2 subunit                                                       |
| SYK     | Spleen tyrosine kinase                                                                            |
| TAF15   | TAF15 RNA polymerase II, TATA box binding protein (TBP)-associated factor, 68 kDa                 |
| TAL2    | T-cell acute lymphocytic leukemia 2                                                               |
| TBL1XR1 | Transducin $\beta$ -like 1 X-linked receptor 1                                                    |
| TCF7L2  | Transcription factor 7-like 2 (T-cell specific, HMG-box)                                          |
| TCL6    | T-cell leukemia/lymphoma 6 (non-protein coding)                                                   |
| TET2    | Tet methylcytosine dioxygenase 2                                                                  |
| TFRC    | Transferrin receptor                                                                              |
| TMPRSS2 | Transmembrane protease, serine 2                                                                  |
| TOP1    | Topoisomerase (DNA) I                                                                             |
| TPM3    | Tropomyosin 3                                                                                     |
| TRA@    | T cell receptor, $\alpha$                                                                         |
| TRIM27  | Tripartite motif containing 27                                                                    |
| TRIM33  | Tripartite motif containing 33                                                                    |
| TRRAP   | Transformation/transcription domain-associated protein                                            |
| TSC1    | Tuberous sclerosis 1                                                                              |
| TSHR    | Thyroid stimulating hormone receptor                                                              |
| U2AF1   | U2 small nuclear RNA auxiliary factor 1                                                           |
| UBR5    | Ubiquitin protein ligase E3 component n-recognin 5                                                |
| VTI1A   | Vesicle transport through interaction with t-SNAREs 1A                                            |
| WHSC1   | Wolf-Hirschhorn syndrome candidate 1                                                              |
| WIF1    | WNT inhibitory factor 1                                                                           |
| YWHAE   | Tyrosine 3-monooxygenase/tryptophan 5-monooxygenase activation protein, epsilon                   |
| ZNF521  | Zinc finger protein 521                                                                           |



**Supplementary Table 6. Predicted targets of hsa-miR-181a-5p by RNA22 v2**

| <b>Gene symbol</b> | <b>Gene name</b>                                                        | <b>Cancer gene</b> |
|--------------------|-------------------------------------------------------------------------|--------------------|
| <b>A2ML1</b>       | $\alpha$ 2-Macroglobulin-like 1                                         |                    |
| <b>AADACL3</b>     | Arylacetamide deacetylase-like 3                                        |                    |
| <b>AADAT</b>       | Aminoadipate aminotransferase                                           |                    |
| <b>AAGAB</b>       | $\alpha$ - and $\gamma$ -Adaptin binding protein                        |                    |
| <b>AAK1</b>        | AP2 associated kinase 1                                                 |                    |
| <b>AAMP</b>        | Angio-associated, migratory cell protein                                |                    |
| <b>AARS</b>        | Alanyl-trna synthetase                                                  |                    |
| <b>AARS2</b>       | Alanyl-trna synthetase 2, mitochondrial (putative)                      |                    |
| <b>AARSD1</b>      | Alanyl-trna synthetase domain containing 1                              |                    |
| <b>AASDHPPT</b>    | Aminoadipate-semialdehyde dehydrogenase-phosphopantetheinyl transferase |                    |
| <b>AASS</b>        | Aminoadipate-semialdehyde synthase                                      |                    |
| <b>ABCA1</b>       | ATP-binding cassette, sub-family A (ABC1), member 1                     |                    |
| <b>ABCA10</b>      | ATP-binding cassette, sub-family A (ABC1), member 10                    |                    |
| <b>ABCA12</b>      | ATP-binding cassette, sub-family A (ABC1), member 12                    |                    |
| <b>ABCA13</b>      | ATP-binding cassette, sub-family A (ABC1), member 13                    |                    |
| <b>ABCA2</b>       | ATP-binding cassette, sub-family A (ABC1), member 2                     |                    |
| <b>ABCA3</b>       | ATP-binding cassette, sub-family A (ABC1), member 3                     |                    |
| <b>ABCA4</b>       | ATP-binding cassette, sub-family A (ABC1), member 4                     |                    |
| <b>ABCA5</b>       | ATP-binding cassette, sub-family A (ABC1), member 5                     |                    |
| <b>ABCA6</b>       | ATP-binding cassette, sub-family A (ABC1), member 6                     |                    |
| <b>ABCA7</b>       | ATP-binding cassette, sub-family A (ABC1), member 7                     |                    |
| <b>ABCA8</b>       | ATP-binding cassette, sub-family A (ABC1), member 8                     |                    |
| <b>ABCA9</b>       | ATP-binding cassette, sub-family A (ABC1), member 9                     |                    |
| <b>ABCB1</b>       | ATP-binding cassette, sub-family B (MDR/TAP), member 1                  |                    |
| <b>ABCB11</b>      | ATP-binding cassette, sub-family B (MDR/TAP), member 11                 |                    |
| <b>ABCB9</b>       | ATP-binding cassette, sub-family B (MDR/TAP), member 9                  |                    |
| <b>ABCC1</b>       | ATP-binding cassette, sub-family C (CFTR/MRP), member 1                 |                    |
| <b>ABCC10</b>      | ATP-binding cassette, sub-family C (CFTR/MRP), member 10                |                    |
| <b>ABCC11</b>      | ATP-binding cassette, sub-family C (CFTR/MRP), member 11                |                    |

|                       |                                                                          |  |
|-----------------------|--------------------------------------------------------------------------|--|
| <b>ABCC12</b>         | ATP-binding cassette, sub-family C (CFTR/MRP), member 12                 |  |
| <b>ABCC3</b>          | ATP-binding cassette, sub-family C (CFTR/MRP), member 3                  |  |
| <b>ABCC4</b>          | ATP-binding cassette, sub-family C (CFTR/MRP), member 4                  |  |
| <b>ABCC5</b>          | ATP-binding cassette, sub-family C (CFTR/MRP), member 5                  |  |
| <b>ABCC6</b>          | ATP-binding cassette, sub-family C (CFTR/MRP), member 6                  |  |
| <b>ABCC8</b>          | ATP-binding cassette, sub-family C (CFTR/MRP), member 8                  |  |
| <b>ABCC9</b>          | ATP-binding cassette, sub-family C (CFTR/MRP), member 9                  |  |
| <b>ABCG4</b>          | ATP-binding cassette, sub-family G (WHITE), member 4                     |  |
| <b>ABCG5</b>          | ATP-binding cassette, sub-family G (WHITE), member 5                     |  |
| <b>ABHD10</b>         | Abhydrolase domain containing 10                                         |  |
| <b>ABHD16A</b>        | Abhydrolase domain containing 16A                                        |  |
| <b>ABHD3</b>          | Abhydrolase domain containing 3                                          |  |
| <b>ABHD4</b>          | Abhydrolase domain containing 4                                          |  |
| <b>ABI2</b>           | Abl-interactor 2                                                         |  |
| <b>ABL2</b>           | V-abl Abelson murine leukemia viral oncogene homolog 2                   |  |
| <b>ABLIM3</b>         | Actin binding LIM protein family, member 3                               |  |
| <b>ABR</b>            | Active BCR-related gene                                                  |  |
| <b>ABT1</b>           | Activator of basal transcription 1                                       |  |
| <b>AC000120.1</b>     | cDNA FLJ56789                                                            |  |
| <b>AC002094.1</b>     | Vitronectin vitronectin V65 subunit vitronectin V10 subunitsomatomedin-B |  |
| <b>AC002511.1</b>     | Cdna FLJ46220 fis, clone TESTI4013774                                    |  |
| <b>AC003682.1</b>     | Zinc finger protein 550                                                  |  |
| <b>AC004223.1</b>     | Cdna FLJ52625                                                            |  |
| <b>AC005324.8-001</b> | Zinc finger protein 286A                                                 |  |
| <b>AC005522.1</b>     | Protein deltex-2                                                         |  |
| <b>AC005726.6</b>     | Uncharacterized serine/threonine-protein kinase sgk494                   |  |
| <b>AC006008.1</b>     | CDNA FLJ26529 fis, clone KDN08784                                        |  |
| <b>AC006305.1</b>     | HCG2045177cDNA FLJ45743 fis, clone KIDNE2016464                          |  |
| <b>AC006372.1</b>     |                                                                          |  |
| <b>AC006449.1</b>     | Cdna FLJ52623                                                            |  |
| <b>AC007000.1</b>     | Coiled-coil domain-containing protein 146                                |  |
| <b>AC007390.5</b>     | HCG1988162Uncharacterized protein                                        |  |

|                   |                                                                                                                                          |  |
|-------------------|------------------------------------------------------------------------------------------------------------------------------------------|--|
| <b>AC007608.1</b> |                                                                                                                                          |  |
| <b>AC008073.5</b> | Pre-mrna branch site protein p14                                                                                                         |  |
| <b>AC008393.1</b> | cDNA FLJ53540                                                                                                                            |  |
| <b>AC008403.1</b> |                                                                                                                                          |  |
| <b>AC008522.1</b> | HCG2016541Putative uncharacterized protein dkfzp434p228                                                                                  |  |
| <b>AC009053.1</b> | cDNA FLJ39449 fis, clone PROST2008360, highly similar to Homo sapiens pyruvate dehydrogenase phosphatase regulatory subunit (PDPR), mRNA |  |
| <b>AC009113.2</b> | cDNA FLJ27068 fis, clone SPL01475                                                                                                        |  |
| <b>AC009123.1</b> | cDNA FLJ38012 fis, clone CTONG2012554                                                                                                    |  |
| <b>AC009955.1</b> | Serine/threonine-protein kinase 11-interacting protein                                                                                   |  |
| <b>AC009996.1</b> |                                                                                                                                          |  |
| <b>AC010198.1</b> | Cdna FLJ75546                                                                                                                            |  |
| <b>AC010328.1</b> | Envelope glycoprotein ENVV1                                                                                                              |  |
| <b>AC010441.1</b> | Putative small membrane protein NID67                                                                                                    |  |
| <b>AC010536.1</b> | HCG1980662                                                                                                                               |  |
| <b>AC010724.2</b> | Golgin subfamily A member 6-like protein 9                                                                                               |  |
| <b>AC010724.3</b> | Chondroitin sulfate proteoglycan 4 pseudogene (LOC440297), non-coding RNA                                                                |  |
| <b>AC010973.1</b> | Autophagy-related protein 9B                                                                                                             |  |
| <b>AC011295.1</b> | Chondroitin sulfate proteoglycan 4 pseudogene (LOC440297), non-coding RNA                                                                |  |
| <b>AC011357.1</b> | Serine/threonine-protein phosphatase 2A 55 kda regulatory subunit B beta isoform                                                         |  |
| <b>AC011443.1</b> | Iron/zinc purple acid phosphatase-like protein                                                                                           |  |
| <b>AC011676.1</b> | HCG2009400SLC45A4 protein                                                                                                                |  |
| <b>AC012313.1</b> | Hepatocellular carcinoma-associated antigen HCA25a                                                                                       |  |
| <b>AC012621.2</b> | Centrosomal protein CP110                                                                                                                |  |
| <b>AC012652.1</b> | Calcium-binding protein p22                                                                                                              |  |
| <b>AC013461.1</b> | Mitogen-activated protein kinase kinase kinase MLT                                                                                       |  |
| <b>AC013480.1</b> | cDNA FLJ42903 fis, clone BRHIP3013765                                                                                                    |  |
| <b>AC016889.1</b> | cDNA FLJ50764                                                                                                                            |  |
| <b>AC020907.1</b> | Uncharacterized protein                                                                                                                  |  |
| <b>AC021860.1</b> |                                                                                                                                          |  |

|                   |                                                                                        |  |
|-------------------|----------------------------------------------------------------------------------------|--|
| <b>AC022148.1</b> |                                                                                        |  |
| <b>AC024909.1</b> | Cdna FLJ42271 fis, clone TKIDN2015788                                                  |  |
| <b>AC025287.3</b> | cDNA FLJ58921                                                                          |  |
| <b>AC026495.1</b> | cDNA FLJ60245, highly similar to HECT domain and RCC1-like domain-containing protein 2 |  |
| <b>AC027125.1</b> | ELL-associated factor 1                                                                |  |
| <b>AC027323.1</b> | Lysm and putative peptidoglycan-binding domain-containing protein 3                    |  |
| <b>AC044799.1</b> | cDNA FLJ56854                                                                          |  |
| <b>AC044860.3</b> | Golgin subfamily A member 2-like protein 2                                             |  |
| <b>AC051642.1</b> |                                                                                        |  |
| <b>AC051642.2</b> | HCG1786243PRO1496                                                                      |  |
| <b>AC067745.1</b> | Maxi-K channel HSLO                                                                    |  |
| <b>AC067815.1</b> | cDNA FLJ23789 fis, clone HEP21465                                                      |  |
| <b>AC068775.1</b> | Uncharacterized protein                                                                |  |
| <b>AC073610.1</b> | cDNA, FLJ78869                                                                         |  |
| <b>AC074389.6</b> |                                                                                        |  |
| <b>AC078953.1</b> |                                                                                        |  |
| <b>AC079612.1</b> | cDNA FLJ45964 fis, clone PLACE7014396                                                  |  |
| <b>AC087289.1</b> | cDNA FLJ40144 fis, clone TESTI2013012                                                  |  |
| <b>AC091565.1</b> |                                                                                        |  |
| <b>AC092117.1</b> | cDNA FLJ43818 fis, clone TESTI4001923                                                  |  |
| <b>AC092118.1</b> |                                                                                        |  |
| <b>AC092135.1</b> | C-Maf-inducing protein                                                                 |  |
| <b>AC092329.1</b> | HCG2000535cDNA FLJ32177 fis, clone PLACE6001294                                        |  |
| <b>AC092384.1</b> | Cdna FLJ26728 fis, clone PNC06635                                                      |  |
| <b>AC092723.1</b> | HCG1980276MUSP1                                                                        |  |
| <b>AC093726.6</b> | HCG1999107Uncharacterized protein                                                      |  |
| <b>AC099759.1</b> | STEAP family protein MGC87042                                                          |  |
| <b>AC103588.1</b> | HCG1813935Uncharacterized protein                                                      |  |
| <b>AC104304.1</b> | Putative teratocarcinoma-derived growth factor 2                                       |  |
| <b>AC104523.1</b> | cDNA FLJ46230 fis, clone TESTI4014977                                                  |  |
| <b>AC104650.1</b> | SH3 domain and tetratricopeptide repeats-containing protein 1                          |  |
| <b>AC106772.1</b> | CDNA FLJ20413 fis, clone KAT02170HCG1742967                                            |  |

|                   |                                                                           |  |
|-------------------|---------------------------------------------------------------------------|--|
| <b>AC107373.2</b> | cDNA FLJ53524                                                             |  |
| <b>AC107992.1</b> | cDNA FLJ46325 fis, clone TESTI4043371                                     |  |
| <b>AC108134.1</b> |                                                                           |  |
| <b>AC110491.1</b> | cDNA FLJ60082, weakly similar to Uro-adherence factor A                   |  |
| <b>AC111170.2</b> | cDNA FLJ40589 fis, clone THYMU2009596                                     |  |
| <b>AC111177.1</b> | HCG2044188Seven transmembrane helix receptor                              |  |
| <b>AC114772.1</b> | Uncharacterized protein FLJ45252                                          |  |
| <b>AC114947.1</b> | Serine/threonine-protein kinase NIM1                                      |  |
| <b>AC116655.1</b> |                                                                           |  |
| <b>AC120045.3</b> | cDNA FLJ52611                                                             |  |
| <b>AC129778.2</b> | cDNA FLJ44869 fis, clone BRAMY2015516                                     |  |
| <b>AC130352.1</b> | cDNA FLJ26472 fis, clone KDN04506                                         |  |
| <b>AC131180.1</b> | Uncharacterized protein c2orf14                                           |  |
| <b>AC132186.2</b> | CDNA FLJ27243 fis, clone SYN08134                                         |  |
| <b>AC135995.1</b> | Chondroitin sulfate proteoglycan 4 pseudogene (LOC440297), non-coding RNA |  |
| <b>AC139426.2</b> | Cdna FLJ52611 [Source:uniprotkb/trembl;Acc:B4DXX6]                        |  |
| <b>AC140481.1</b> |                                                                           |  |
| <b>AC145123.1</b> | Jerky protein homolog isoform b                                           |  |
| <b>AC145625.1</b> |                                                                           |  |
| <b>AC217773.1</b> |                                                                           |  |
| <b>ACACA</b>      | Acetyl-coa carboxylase alpha                                              |  |
| <b>ACAD8</b>      | Acyl-coa dehydrogenase family, member 8                                   |  |
| <b>ACAD9</b>      | Acyl-coa dehydrogenase family, member 9                                   |  |
| <b>ACADS</b>      | Acyl-coa dehydrogenase, C-2 to C-3 short chain                            |  |
| <b>ACADSB</b>     | Acyl-coa dehydrogenase, short/branched chain                              |  |
| <b>ACAN</b>       | Aggrecan                                                                  |  |
| <b>ACAP1</b>      | Arfgap with coiled-coil, ankyrin repeat and PH domains 1                  |  |
| <b>ACAP2</b>      | Arfgap with coiled-coil, ankyrin repeat and PH domains 2                  |  |
| <b>ACAT1</b>      | Acetyl-coa acetyltransferase 1                                            |  |
| <b>ACBD5</b>      | Acyl-coa binding domain containing 5                                      |  |
| <b>ACCN1</b>      | Amiloride-sensitive cation channel 1, neuronal                            |  |
| <b>ACCN3</b>      | Amiloride-sensitive cation channel 3                                      |  |

|                   |                                                           |  |
|-------------------|-----------------------------------------------------------|--|
| <b>ACER3</b>      | Alkaline ceramidase 3                                     |  |
| <b>ACLY</b>       | ATP citrate lyase                                         |  |
| <b>ACO1</b>       | Aconitase 1, soluble                                      |  |
| <b>ACOT11</b>     | Acyl-coa thioesterase 11                                  |  |
| <b>ACOX1</b>      | Acyl-coa oxidase 1, palmitoyl                             |  |
| <b>ACP2</b>       | Acid phosphatase 2, lysosomal                             |  |
| <b>ACP6</b>       | Acid phosphatase 6, lysophosphatidic                      |  |
| <b>ACRC</b>       | Acidic repeat containing                                  |  |
| <b>ACRV1</b>      | Acrosomal vesicle protein 1                               |  |
| <b>ACSBG1</b>     | Acyl-CoA synthetase bubblegum family member 1             |  |
| <b>ACSF3</b>      | Acyl-CoA synthetase family member 3                       |  |
| <b>ACSL1</b>      | Acyl-CoA synthetase long-chain family member 1            |  |
| <b>ACSL6</b>      | Acyl-CoA synthetase long-chain family member 6            |  |
| <b>ACSM3</b>      | Acyl-CoA synthetase medium-chain family member 3          |  |
| <b>ACSM5</b>      | Acyl-CoA synthetase medium-chain family member 5          |  |
| <b>ACSS1</b>      | Acyl-CoA synthetase short-chain family member 1           |  |
| <b>ACSS2</b>      | Acyl-CoA synthetase short-chain family member 2           |  |
| <b>ACTG1</b>      | Actin, gamma 1                                            |  |
| <b>ACTL6A</b>     | Actin-like 6A                                             |  |
| <b>ACTN2</b>      | Actinin, alpha 2                                          |  |
| <b>ACTN4</b>      | Actinin, alpha 4                                          |  |
| <b>ACTR3</b>      | ARP3 actin-related protein 3 homolog (yeast)              |  |
| <b>ACTR3B</b>     | ARP3 actin-related protein 3 homolog B (yeast)            |  |
| <b>ACTR6</b>      | ARP6 actin-related protein 6 homolog (yeast)              |  |
| <b>ACTRT2</b>     | Actin-related protein T2                                  |  |
| <b>ACVR1</b>      | Activin A receptor, type I                                |  |
| <b>ACVR1B</b>     | Activin A receptor, type IB                               |  |
| <b>ACVR2A</b>     | Activin A receptor, type IIA                              |  |
| <b>AD000671.1</b> | Histone-lysine N-methyltransferase MLL4                   |  |
| <b>AD000685.1</b> | Leukotriene-B(4) omega-hydroxylase 2                      |  |
| <b>AD001527.1</b> | Putative transcription factor Ovo-like 2-like             |  |
| <b>ADAD1</b>      | Adenosine deaminase domain containing 1 (testis-specific) |  |
| <b>ADAL</b>       | Adenosine deaminase-like                                  |  |

|                 |                                                                                           |  |
|-----------------|-------------------------------------------------------------------------------------------|--|
| <b>ADAM10</b>   | ADAM metallopeptidase domain 10                                                           |  |
| <b>ADAM12</b>   | ADAM metallopeptidase domain 12                                                           |  |
| <b>ADAM15</b>   | ADAM metallopeptidase domain 15                                                           |  |
| <b>ADAM22</b>   | ADAM metallopeptidase domain 22                                                           |  |
| <b>ADAM29</b>   | ADAM metallopeptidase domain 29                                                           |  |
| <b>ADAM30</b>   | ADAM metallopeptidase domain 30                                                           |  |
| <b>ADAM32</b>   | ADAM metallopeptidase domain 32                                                           |  |
| <b>ADAM33</b>   | ADAM metallopeptidase domain 33                                                           |  |
| <b>ADAM7</b>    | ADAM metallopeptidase domain 7                                                            |  |
| <b>ADAM9</b>    | ADAM metallopeptidase domain 9                                                            |  |
| <b>ADAMTS1</b>  | ADAM metallopeptidase with thrombospondin type 1 motif, 1                                 |  |
| <b>ADAMTS10</b> | ADAM metallopeptidase with thrombospondin type 1 motif, 10                                |  |
| <b>ADAMTS12</b> | ADAM metallopeptidase with thrombospondin type 1 motif, 12                                |  |
| <b>ADAMTS16</b> | ADAM metallopeptidase with thrombospondin type 1 motif, 16                                |  |
| <b>ADAMTS17</b> | ADAM metallopeptidase with thrombospondin type 1 motif, 17 [Source:HGNC Symbol;Acc:17109] |  |
| <b>ADAMTS18</b> | ADAM metallopeptidase with thrombospondin type 1 motif, 18                                |  |
| <b>ADAMTS20</b> | ADAM metallopeptidase with thrombospondin type 1 motif, 20                                |  |
| <b>ADAMTS3</b>  | ADAM metallopeptidase with thrombospondin type 1 motif, 3                                 |  |
| <b>ADAMTS5</b>  | ADAM metallopeptidase with thrombospondin type 1 motif, 5                                 |  |
| <b>ADAMTS7</b>  | ADAM metallopeptidase with thrombospondin type 1 motif, 7                                 |  |
| <b>ADAMTS9</b>  | ADAM metallopeptidase with thrombospondin type 1 motif, 9                                 |  |
| <b>ADAMTSL1</b> | ADAMTS-like 1                                                                             |  |
| <b>ADAMTSL2</b> | ADAMTS-like 2                                                                             |  |
| <b>ADAMTSL4</b> | ADAMTS-like 4                                                                             |  |
| <b>ADARB1</b>   | Adenosine deaminase, RNA-specific, B1                                                     |  |
| <b>ADARB2</b>   | Adenosine deaminase, RNA-specific, B2                                                     |  |
| <b>ADAT1</b>    | Adenosine deaminase, trna-specific 1                                                      |  |
| <b>ADC</b>      | Arginine decarboxylase                                                                    |  |
| <b>ADCK2</b>    | Aarf domain containing kinase 2                                                           |  |
| <b>ADCK3</b>    | Aarf domain containing kinase 3                                                           |  |
| <b>ADCK4</b>    | Aarf domain containing kinase 4                                                           |  |
| <b>ADCK5</b>    | Aarf domain containing kinase 5                                                           |  |

|                  |                                                                        |  |
|------------------|------------------------------------------------------------------------|--|
| <b>ADCY1</b>     | Adenylate cyclase 1 (brain)                                            |  |
| <b>ADCY10</b>    | Adenylate cyclase 10 (soluble)                                         |  |
| <b>ADCY2</b>     | Adenylate cyclase 2 (brain)                                            |  |
| <b>ADCY4</b>     | Adenylate cyclase 4                                                    |  |
| <b>ADCY5</b>     | Adenylate cyclase 5                                                    |  |
| <b>ADCY6</b>     | Adenylate cyclase 6                                                    |  |
| <b>ADCY7</b>     | Adenylate cyclase 7                                                    |  |
| <b>ADCY9</b>     | Adenylate cyclase 9                                                    |  |
| <b>ADCYAP1R1</b> | Adenylate cyclase activating polypeptide 1 (pituitary) receptor type I |  |
| <b>ADD2</b>      | Adducin 2 (beta)                                                       |  |
| <b>ADH1A</b>     | Alcohol dehydrogenase 1A (class I), alpha polypeptide                  |  |
| <b>ADH6</b>      | Alcohol dehydrogenase 6 (class V)                                      |  |
| <b>ADH7</b>      | Alcohol dehydrogenase 7 (class IV), mu or sigma polypeptide            |  |
| <b>ADHFE1</b>    | Alcohol dehydrogenase, iron containing, 1                              |  |
| <b>ADIPOR1</b>   | Adiponectin receptor 1                                                 |  |
| <b>ADNP</b>      | Activity-dependent neuroprotector homeobox                             |  |
| <b>ADNP2</b>     | ADNP homeobox 2                                                        |  |
| <b>ADORA2B</b>   | Adenosine A2b receptor                                                 |  |
| <b>ADORA3</b>    | Adenosine A3 receptor                                                  |  |
| <b>ADPGK</b>     | ADP-dependent glucokinase                                              |  |
| <b>ADRA1A</b>    | Adrenergic, alpha-1A-, receptor                                        |  |
| <b>ADRA1B</b>    | Adrenergic, alpha-1B-, receptor                                        |  |
| <b>ADRA1D</b>    | Adrenergic, alpha-1D-, receptor                                        |  |
| <b>ADRB2</b>     | Adrenergic, beta-2-, receptor, surface                                 |  |
| <b>ADRBK2</b>    | Adrenergic, beta, receptor kinase 2                                    |  |
| <b>ADSSL1</b>    | Adenylosuccinate synthase like 1                                       |  |
| <b>AEBP1</b>     | AE binding protein 1                                                   |  |
| <b>AES</b>       | Amino-terminal enhancer of split                                       |  |
| <b>AFAP1</b>     | Actin filament associated protein 1                                    |  |
| <b>AFAP1L1</b>   | Actin filament associated protein 1-like 1                             |  |
| <b>AFAP1L2</b>   | Actin filament associated protein 1-like 2                             |  |
| <b>AFF3</b>      | AF4/FMR2 family, member 3                                              |  |
| <b>AFG3L2</b>    | AFG3 atpase family gene 3-like 2 ( <i>S. Cerevisiae</i> )              |  |



|               |                                                                                                 |  |
|---------------|-------------------------------------------------------------------------------------------------|--|
| <b>AGAP1</b>  | Arfgap with gtpase domain, ankyrin repeat and PH domain 1                                       |  |
| <b>AGAP2</b>  | Arfgap with gtpase domain, ankyrin repeat and PH domain 2                                       |  |
| <b>AGAP9</b>  | Arfgap with gtpase domain, ankyrin repeat and PH domain 9                                       |  |
| <b>AGBL2</b>  | ATP/GTP binding protein-like 2                                                                  |  |
| <b>AGER</b>   | Advanced glycosylation end product-specific receptor                                            |  |
| <b>AGFG2</b>  | Arfgap with FG repeats 2                                                                        |  |
| <b>AGGF1</b>  | Angiogenic factor with G patch and FHA domains 1                                                |  |
| <b>AGMAT</b>  | Agmatine ureohydrolase (agmatinase)                                                             |  |
| <b>AGMO</b>   | Alkylglycerol monooxygenase                                                                     |  |
| <b>AGPAT1</b> | 1-acylglycerol-3-phosphate O-acyltransferase 1 (lysophosphatidic acid acyltransferase, alpha)   |  |
| <b>AGPAT4</b> | 1-Acylglycerol-3-phosphate O-acyltransferase 4 (lysophosphatidic acid acyltransferase, delta)   |  |
| <b>AGPAT5</b> | 1-Acylglycerol-3-phosphate O-acyltransferase 5 (lysophosphatidic acid acyltransferase, epsilon) |  |
| <b>AGPAT9</b> | 1-Acylglycerol-3-phosphate O-acyltransferase 9                                                  |  |
| <b>AGPHD1</b> | Aminoglycoside phosphotransferase domain containing 1                                           |  |
| <b>AGRN</b>   | Agrin                                                                                           |  |
| <b>AGT</b>    | Angiotensinogen (serpin peptidase inhibitor, clade A, member 8)                                 |  |
| <b>AGTR1</b>  | Angiotensin II receptor, type 1                                                                 |  |
| <b>AGTRAP</b> | Angiotensin II receptor-associated protein                                                      |  |
| <b>AGXT</b>   | Alanine-glyoxylate aminotransferase                                                             |  |
| <b>AHCTF1</b> | AT hook containing transcription factor 1                                                       |  |
| <b>AHCY</b>   | Adenosylhomocysteinase                                                                          |  |
| <b>AHCYL1</b> | Adenosylhomocysteinase-like 1                                                                   |  |
| <b>AHNAK</b>  | AHNAK nucleoprotein                                                                             |  |
| <b>AHNAK2</b> | AHNAK nucleoprotein 2                                                                           |  |
| <b>AHR</b>    | Aryl hydrocarbon receptor                                                                       |  |
| <b>AHSA2</b>  | AHA1, activator of heat shock 90kda protein atpase homolog 2 (yeast)                            |  |
| <b>AIFM2</b>  | Apoptosis-inducing factor, mitochondrion-associated, 2                                          |  |
| <b>AIG1</b>   | Androgen-induced 1                                                                              |  |
| <b>AIM1L</b>  | Absent in melanoma 1-like                                                                       |  |
| <b>AIMP2</b>  | Aminoacyl trna synthetase complex-interacting multifunctional protein 2                         |  |

|                   |                                                                                  |   |
|-------------------|----------------------------------------------------------------------------------|---|
| <b>AIP</b>        | Aryl hydrocarbon receptor interacting protein                                    |   |
| <b>AIRE</b>       | Autoimmune regulator                                                             |   |
| <b>AJAP1</b>      | Adherens junctions associated protein 1                                          |   |
| <b>AK1</b>        | Adenylate kinase 1                                                               |   |
| <b>AK7</b>        | Adenylate kinase 7                                                               |   |
| <b>AKAP1</b>      | A kinase (PRKA) anchor protein 1                                                 |   |
| <b>AKAP11</b>     | A kinase (PRKA) anchor protein 11                                                |   |
| <b>AKAP12</b>     | A kinase (PRKA) anchor protein 12                                                |   |
| <b>AKAP13</b>     | A kinase (PRKA) anchor protein 13                                                |   |
| <b>AKAP2</b>      | A kinase (PRKA) anchor protein 2                                                 |   |
| <b>AKAP4</b>      | A kinase (PRKA) anchor protein 4                                                 |   |
| <b>AKAP6</b>      | A kinase (PRKA) anchor protein 6                                                 |   |
| <b>AKAP8L</b>     | A kinase (PRKA) anchor protein 8-like                                            |   |
| <b>AKAP9</b>      | A kinase (PRKA) anchor protein (yotiao) 9                                        | √ |
| <b>AKR1B1</b>     | Aldo-keto reductase family 1, member B1 (aldose reductase)                       |   |
| <b>AKR1D1</b>     | Aldo-keto reductase family 1, member D1 (delta 4-3-ketosteroid-5-beta-reductase) |   |
| <b>AKR7L</b>      | Aldo-keto reductase family 7-like                                                |   |
| <b>AKT3</b>       | V-akt murine thymoma viral oncogene homolog 3 (protein kinase B, gamma)          |   |
| <b>AKTIP</b>      | AKT interacting protein                                                          |   |
| <b>AL022341.2</b> | cDNA FLJ59058                                                                    |   |
| <b>AL033381.1</b> | cDNA FLJ34594 fis, clone KIDNE2009109                                            |   |
| <b>AL049840.1</b> | cDNA FLJ53535                                                                    |   |
| <b>AL078585.1</b> | cDNA FLJ58069                                                                    |   |
| <b>AL117190.3</b> | cDNA FLJ42589 fis, clone BRACE3009701                                            |   |
| <b>AL121595.1</b> |                                                                                  |   |
| <b>AL122001.2</b> | NOL1/NOP2/Sun domain family member 4                                             |   |
| <b>AL133216.1</b> |                                                                                  |   |
| <b>AL137145.1</b> |                                                                                  |   |
| <b>AL139010.1</b> | HCG1995134cDNA FLJ33235 fis, clone ASTRO2002202                                  |   |
| <b>AL139300.1</b> | UPF0671 protein c14orf153                                                        |   |
| <b>AL157996.1</b> | UPF0639 protein                                                                  |   |
| <b>AL162407.1</b> | CDNA FLJ20147 fis, clone COL07954HCG1781466                                      |   |

|                   |                                                                                               |  |
|-------------------|-----------------------------------------------------------------------------------------------|--|
| <b>AL353597.1</b> |                                                                                               |  |
| <b>AL353996.1</b> |                                                                                               |  |
| <b>AL354898.1</b> | Hemicentin-2                                                                                  |  |
| <b>AL355149.1</b> |                                                                                               |  |
| <b>AL356356.1</b> |                                                                                               |  |
| <b>AL358216.1</b> | CDNA FLJ26714 fis, clone PNC01043 [Source:uniprotkb/trembl;Acc:Q6ZP19]                        |  |
| <b>AL359075.1</b> | Protein transport protein Sec16B                                                              |  |
| <b>AL359195.1</b> | Cdna FLJ46261 fis, clone TESTI4025062                                                         |  |
| <b>AL359266.1</b> |                                                                                               |  |
| <b>AL359644.2</b> | Inactive N-acetyllactosaminide alpha-1,3-galactosyltransferase                                |  |
| <b>AL359853.4</b> | Torsin-1A-interacting protein 2                                                               |  |
| <b>AL360181.1</b> | Mitochondrial gtpase 1                                                                        |  |
| <b>AL390816.1</b> | UPF0730 protein CS0DE013YM09                                                                  |  |
| <b>AL391277.1</b> | Cdna FLJ10894 fis, clone NT2RP4002888, highly similar to Homo sapiens mrna; cdna dkfzp434f172 |  |
| <b>AL442069.1</b> | Cdna FLJ43764 fis, clone TESTI2048898                                                         |  |
| <b>AL445163.2</b> | CDNA FLJ26873 fis, clone PRS08805 [Source:uniprotkb/trembl;Acc:Q6ZNY8]                        |  |
| <b>AL450307.1</b> | Cdna FLJ46300 fis, clone TESTI4035989<br>[Source:uniprotkb/trembl;Acc:Q6ZRK0]                 |  |
| <b>AL669970.1</b> |                                                                                               |  |
| <b>AL683812.1</b> | CDNA FLJ25733 fis, clone TST05652 [Source:uniprotkb/trembl;Acc:Q8N7E4]                        |  |
| <b>ALAD</b>       | Aminolevulinate dehydratase [Source:HGNC Symbol;Acc:395]                                      |  |
| <b>ALAS1</b>      | Aminolevulinate, delta-, synthase 1 [Source:HGNC Symbol;Acc:396]                              |  |
| <b>ALDH1A1</b>    | Aldehyde dehydrogenase 1 family, member A1 [Source:HGNC Symbol;Acc:402]                       |  |
| <b>ALDH1A2</b>    | Aldehyde dehydrogenase 1 family, member A2 [Source:HGNC Symbol;Acc:15472]                     |  |
| <b>ALDH1A3</b>    | Aldehyde dehydrogenase 1 family, member A3 [Source:HGNC Symbol;Acc:409]                       |  |

|                 |                                                                                                                    |  |
|-----------------|--------------------------------------------------------------------------------------------------------------------|--|
| <b>ALDH1B1</b>  | Aldehyde dehydrogenase 1 family, member B1 [Source:HGNC Symbol;Acc:407]                                            |  |
| <b>ALDH1L2</b>  | Aldehyde dehydrogenase 1 family, member L2 [Source:HGNC Symbol;Acc:26777]                                          |  |
| <b>ALDH3A2</b>  | Aldehyde dehydrogenase 3 family, member A2 [Source:HGNC Symbol;Acc:403]                                            |  |
| <b>ALDH6A1</b>  | Aldehyde dehydrogenase 6 family, member A1 [Source:HGNC Symbol;Acc:7179]                                           |  |
| <b>ALDH7A1</b>  | Aldehyde dehydrogenase 7 family, member A1 [Source:HGNC Symbol;Acc:877]                                            |  |
| <b>ALDH8A1</b>  | Aldehyde dehydrogenase 8 family, member A1 [Source:HGNC Symbol;Acc:15471]                                          |  |
| <b>ALDH9A1</b>  | Aldehyde dehydrogenase 9 family, member A1 [Source:HGNC Symbol;Acc:412]                                            |  |
| <b>ALDOA</b>    | Aldolase A, fructose-bisphosphate [Source:HGNC Symbol;Acc:414]                                                     |  |
| <b>ALG10B</b>   | Asparagine-linked glycosylation 10, alpha-1,2-glucosyltransferase homolog B (yeast) [Source:HGNC Symbol;Acc:31088] |  |
| <b>ALG13</b>    | Asparagine-linked glycosylation 13 homolog (S. Cerevisiae) [Source:HGNC Symbol;Acc:30881]                          |  |
| <b>ALMS1</b>    | Alstrom syndrome 1 [Source:HGNC Symbol;Acc:428]                                                                    |  |
| <b>ALPK1</b>    | Alpha-kinase 1 [Source:HGNC Symbol;Acc:20917]                                                                      |  |
| <b>ALPK3</b>    | Alpha-kinase 3 [Source:HGNC Symbol;Acc:17574]                                                                      |  |
| <b>ALS2CL</b>   | ALS2 C-terminal like [Source:HGNC Symbol;Acc:20605]                                                                |  |
| <b>ALS2CR11</b> | Amyotrophic lateral sclerosis 2 (juvenile) chromosome region, candidate 11 [Source:HGNC Symbol;Acc:14438]          |  |
| <b>ALS2CR4</b>  | Amyotrophic lateral sclerosis 2 (juvenile) chromosome region, candidate 4 [Source:HGNC Symbol;Acc:14432]           |  |
| <b>ALS2CR8</b>  | Amyotrophic lateral sclerosis 2 (juvenile) chromosome region, candidate 8 [Source:HGNC Symbol;Acc:14435]           |  |
| <b>ALX4</b>     | ALX homeobox 4 [Source:HGNC Symbol;Acc:450]                                                                        |  |
| <b>AMAC1</b>    | Acyl-malonyl condensing enzyme 1 [Source:HGNC Symbol;Acc:26848]                                                    |  |
| <b>AMAC1L2</b>  | Acyl-malonyl condensing enzyme 1-like 2 [Source:HGNC Symbol;Acc:15546]                                             |  |

|                |                                                                                  |  |
|----------------|----------------------------------------------------------------------------------|--|
| <b>AMBP</b>    | Alpha-1-microglobulin/bikunin precursor [Source:HGNC Symbol;Acc:453]             |  |
| <b>AMBRA1</b>  | Autophagy/beclin-1 regulator 1 [Source:HGNC Symbol;Acc:25990]                    |  |
| <b>AMD1</b>    | Adenosylmethionine decarboxylase 1 [Source:HGNC Symbol;Acc:457]                  |  |
| <b>AMFR</b>    | Autocrine motility factor receptor [Source:HGNC Symbol;Acc:463]                  |  |
| <b>AMHR2</b>   | Anti-Mullerian hormone receptor, type II [Source:HGNC Symbol;Acc:465]            |  |
| <b>AMICA1</b>  | Adhesion molecule, interacts with CXADR antigen 1 [Source:HGNC Symbol;Acc:19084] |  |
| <b>AMIGO3</b>  | Adhesion molecule with Ig-like domain 3 [Source:HGNC Symbol;Acc:24075]           |  |
| <b>AMN</b>     | Amnionless homolog (mouse) [Source:HGNC Symbol;Acc:14604]                        |  |
| <b>AMOT</b>    | Angiomotin [Source:HGNC Symbol;Acc:17810]                                        |  |
| <b>AMOTL1</b>  | Angiomotin like 1 [Source:HGNC Symbol;Acc:17811]                                 |  |
| <b>AMPD2</b>   | Adenosine monophosphate deaminase 2 [Source:HGNC Symbol;Acc:469]                 |  |
| <b>AMPD3</b>   | Adenosine monophosphate deaminase 3 [Source:HGNC Symbol;Acc:470]                 |  |
| <b>AMTN</b>    | Amelotin [Source:HGNC Symbol;Acc:33188]                                          |  |
| <b>AMY1A</b>   | Amylase, alpha 1A (salivary) [Source:HGNC Symbol;Acc:474]                        |  |
| <b>AMY1B</b>   | Amylase, alpha 1B (salivary) [Source:HGNC Symbol;Acc:475]                        |  |
| <b>ANAPC1</b>  | Anaphase promoting complex subunit 1 [Source:HGNC Symbol;Acc:19988]              |  |
| <b>ANAPC5</b>  | Anaphase promoting complex subunit 5 [Source:HGNC Symbol;Acc:15713]              |  |
| <b>ANAPC7</b>  | Anaphase promoting complex subunit 7 [Source:HGNC Symbol;Acc:17380]              |  |
| <b>ANGEL1</b>  | Angel homolog 1 (Drosophila) [Source:HGNC Symbol;Acc:19961]                      |  |
| <b>ANGEL2</b>  | Angel homolog 2 (Drosophila) [Source:HGNC Symbol;Acc:30534]                      |  |
| <b>ANGPT4</b>  | Angiopoietin 4 [Source:HGNC Symbol;Acc:487]                                      |  |
| <b>ANGPTL2</b> | Angiopoietin-like 2 [Source:HGNC Symbol;Acc:490]                                 |  |
| <b>ANK3</b>    | Ankyrin 3, node of Ranvier (ankyrin G) [Source:HGNC Symbol;Acc:494]              |  |
| <b>ANKDD1A</b> | Ankyrin repeat and death domain containing 1A [Source:HGNC Symbol;Acc:28002]     |  |
| <b>ANKFY1</b>  | Ankyrin repeat and FYVE domain containing 1 [Source:HGNC Symbol;Acc:20763]       |  |
| <b>ANKH</b>    | Ankylosis, progressive homolog (mouse) [Source:HGNC Symbol;Acc:15492]            |  |
| <b>ANKHD1</b>  | Ankyrin repeat and KH domain containing 1 [Source:HGNC Symbol;Acc:24714]         |  |

|                  |                                                                                           |  |
|------------------|-------------------------------------------------------------------------------------------|--|
| <b>ANKLE2</b>    | Ankyrin repeat and LEM domain containing 2 [Source:HGNC Symbol;Acc:29101]                 |  |
| <b>ANKMY1</b>    | Ankyrin repeat and MYND domain containing 1 [Source:HGNC Symbol;Acc:20987]                |  |
| <b>ANKMY2</b>    | Ankyrin repeat and MYND domain containing 2 [Source:HGNC Symbol;Acc:25370]                |  |
| <b>ANKRD10</b>   | Ankyrin repeat domain 10 [Source:HGNC Symbol;Acc:20265]                                   |  |
| <b>ANKRD11</b>   | Ankyrin repeat domain 11 [Source:HGNC Symbol;Acc:21316]                                   |  |
| <b>ANKRD12</b>   | Ankyrin repeat domain 12 [Source:HGNC Symbol;Acc:29135]                                   |  |
| <b>ANKRD17</b>   | Ankyrin repeat domain 17 [Source:HGNC Symbol;Acc:23575]                                   |  |
| <b>ANKRD18A</b>  | Ankyrin repeat domain 18A [Source:HGNC Symbol;Acc:23643]                                  |  |
| <b>ANKRD18B</b>  | Ankyrin repeat domain 18B [Source:HGNC Symbol;Acc:23644]                                  |  |
| <b>ANKRD20A3</b> | Ankyrin repeat domain 20 family, member A3 [Source:HGNC Symbol;Acc:31981]                 |  |
| <b>ANKRD20A4</b> | Ankyrin repeat domain 20 family, member A4 [Source:HGNC Symbol;Acc:31982]                 |  |
| <b>ANKRD22</b>   | Ankyrin repeat domain 22 [Source:HGNC Symbol;Acc:28321]                                   |  |
| <b>ANKRD26</b>   | Ankyrin repeat domain 26 [Source:HGNC Symbol;Acc:29186]                                   |  |
| <b>ANKRD28</b>   | Ankyrin repeat domain 28 [Source:HGNC Symbol;Acc:29024]                                   |  |
| <b>ANKRD29</b>   | Ankyrin repeat domain 29 [Source:HGNC Symbol;Acc:27110]                                   |  |
| <b>ANKRD30B</b>  | Ankyrin repeat domain 30B [Source:HGNC Symbol;Acc:24165]                                  |  |
| <b>ANKRD31</b>   | Ankyrin repeat domain 31 [Source:HGNC Symbol;Acc:26853]                                   |  |
| <b>ANKRD34B</b>  | Ankyrin repeat domain 34B [Source:HGNC Symbol;Acc:33736]                                  |  |
| <b>ANKRD37</b>   | Ankyrin repeat domain 37 [Source:HGNC Symbol;Acc:29593]                                   |  |
| <b>ANKRD40</b>   | Ankyrin repeat domain 40 [Source:HGNC Symbol;Acc:28233]                                   |  |
| <b>ANKRD43</b>   | Ankyrin repeat domain 43 [Source:HGNC Symbol;Acc:27033]                                   |  |
| <b>ANKRD49</b>   | Ankyrin repeat domain 49 [Source:HGNC Symbol;Acc:25970]                                   |  |
| <b>ANKRD52</b>   | Ankyrin repeat domain 52 [Source:HGNC Symbol;Acc:26614]                                   |  |
| <b>ANKRD53</b>   | Ankyrin repeat domain 53 [Source:HGNC Symbol;Acc:25691]                                   |  |
| <b>ANKRD57</b>   | Ankyrin repeat domain 57 [Source:HGNC Symbol;Acc:26149]                                   |  |
| <b>ANKS3</b>     | Ankyrin repeat and sterile alpha motif domain containing 3 [Source:HGNC Symbol;Acc:29422] |  |

|                   |                                                                                                        |  |
|-------------------|--------------------------------------------------------------------------------------------------------|--|
| <b>ANKS6</b>      | Ankyrin repeat and sterile alpha motif domain containing 6 [Source:HGNC Symbol;Acc:26724]              |  |
| <b>ANO2</b>       | Anoctamin 2 [Source:HGNC Symbol;Acc:1183]                                                              |  |
| <b>ANO4</b>       | Anoctamin 4 [Source:HGNC Symbol;Acc:23837]                                                             |  |
| <b>ANO6</b>       | Anoctamin 6 [Source:HGNC Symbol;Acc:25240]                                                             |  |
| <b>ANO8</b>       | Anoctamin 8 [Source:HGNC Symbol;Acc:29329]                                                             |  |
| <b>ANTXR1</b>     | Anthrax toxin receptor 1 [Source:HGNC Symbol;Acc:21014]                                                |  |
| <b>ANTXR2</b>     | Anthrax toxin receptor 2 [Source:HGNC Symbol;Acc:21732]                                                |  |
| <b>ANXA11</b>     | Annexin A11 [Source:HGNC Symbol;Acc:535]                                                               |  |
| <b>ANXA2</b>      | Annexin A2 [Source:HGNC Symbol;Acc:537]                                                                |  |
| <b>ANXA5</b>      | Annexin A5 [Source:HGNC Symbol;Acc:543]                                                                |  |
| <b>ANXA8</b>      | Annexin A8 [Source:HGNC Symbol;Acc:546]                                                                |  |
| <b>ANXA8L1</b>    | Annexin A8-like 1 [Source:HGNC Symbol;Acc:23334]                                                       |  |
| <b>ANXA8L2</b>    | Annexin A8-like 2 [Source:HGNC Symbol;Acc:23335]                                                       |  |
| <b>AOAH</b>       | Acyloxyacyl hydrolase (neutrophil) [Source:HGNC Symbol;Acc:548]                                        |  |
| <b>AOC2</b>       | Amine oxidase, copper containing 2 (retina-specific) [Source:HGNC Symbol;Acc:549]                      |  |
| <b>AOX1</b>       | Aldehyde oxidase 1 [Source:HGNC Symbol;Acc:553]                                                        |  |
| <b>AP000708.1</b> |                                                                                                        |  |
| <b>AP000859.2</b> | HCG2033177cDNA FLJ30908 fis, clone FEBRA2006150 [Source:uniprotkb/trembl;Acc:Q96NH1]                   |  |
| <b>AP000907.1</b> | Heat shock protein beta-2 [Source:uniprotkb/Swiss-Prot;Acc:Q16082]                                     |  |
| <b>AP001046.1</b> | Uncharacterized protein c21orf136 [Source:uniprotkb/Swiss-Prot;Acc:Q6ZN03]                             |  |
| <b>AP001781.2</b> | Ferredoxin-fold anticodon-binding domain-containing protein 1 [Source:uniprotkb/Swiss-Prot;Acc:Q9BRP7] |  |
| <b>AP002986.1</b> | Cdna FLJ41054 fis, clone STOMA1000189 [Source:uniprotkb/trembl;Acc:Q6ZWH7]                             |  |
| <b>AP003774.4</b> | HCG1652096, isoform CRA_acdna FLJ37045 fis, clone BRACE2012185 [Source:uniprotkb/trembl;Acc:Q8N9J4]    |  |
| <b>AP1B1</b>      | Adaptor-related protein complex 1, beta 1 subunit [Source:HGNC Symbol;Acc:554]                         |  |

|                |                                                                                                     |  |
|----------------|-----------------------------------------------------------------------------------------------------|--|
| <b>AP1G1</b>   | Adaptor-related protein complex 1, gamma 1 subunit [Source:HGNC Symbol;Acc:555]                     |  |
| <b>AP1S2</b>   | Adaptor-related protein complex 1, sigma 2 subunit [Source:HGNC Symbol;Acc:560]                     |  |
| <b>AP2A2</b>   | Adaptor-related protein complex 2, alpha 2 subunit [Source:HGNC Symbol;Acc:562]                     |  |
| <b>AP3B1</b>   | Adaptor-related protein complex 3, beta 1 subunit [Source:HGNC Symbol;Acc:566]                      |  |
| <b>AP3M1</b>   | Adaptor-related protein complex 3, mu 1 subunit [Source:HGNC Symbol;Acc:569]                        |  |
| <b>AP3M2</b>   | Adaptor-related protein complex 3, mu 2 subunit [Source:HGNC Symbol;Acc:570]                        |  |
| <b>AP3S2</b>   | Adaptor-related protein complex 3, sigma 2 subunit [Source:HGNC Symbol;Acc:571]                     |  |
| <b>AP4E1</b>   | Adaptor-related protein complex 4, epsilon 1 subunit [Source:HGNC Symbol;Acc:573]                   |  |
| <b>APBB1</b>   | Amyloid beta (A4) precursor protein-binding, family B, member 1 (Fe65) [Source:HGNC Symbol;Acc:581] |  |
| <b>APCDD1</b>  | Adenomatosis polyposis coli down-regulated 1 [Source:HGNC Symbol;Acc:15718]                         |  |
| <b>APCDD1L</b> | Adenomatosis polyposis coli down-regulated 1-like [Source:HGNC Symbol;Acc:26892]                    |  |
| <b>APCS</b>    | Amyloid P component, serum [Source:HGNC Symbol;Acc:584]                                             |  |
| <b>APEX2</b>   | APEX nuclease (apurinic/apurimidinic endonuclease) 2 [Source:HGNC Symbol;Acc:17889]                 |  |
| <b>APIP</b>    | APAF1 interacting protein [Source:HGNC Symbol;Acc:17581]                                            |  |
| <b>APLF</b>    | Aprataxin and PNKP like factor [Source:HGNC Symbol;Acc:28724]                                       |  |
| <b>APLN</b>    | Apelin [Source:HGNC Symbol;Acc:16665]                                                               |  |
| <b>APLP1</b>   | Amyloid beta (A4) precursor-like protein 1 [Source:HGNC Symbol;Acc:597]                             |  |
| <b>APLP2</b>   | Amyloid beta (A4) precursor-like protein 2 [Source:HGNC Symbol;Acc:598]                             |  |
| <b>APOA1</b>   | Apolipoprotein A-I [Source:HGNC Symbol;Acc:600]                                                     |  |



|                |                                                                                                                        |  |
|----------------|------------------------------------------------------------------------------------------------------------------------|--|
| <b>APOA4</b>   | Apolipoprotein A-IV [Source:HGNC Symbol;Acc:602]                                                                       |  |
| <b>APOB</b>    | Apolipoprotein B (including Ag(x) antigen) [Source:HGNC Symbol;Acc:603]                                                |  |
| <b>APOBEC4</b> | Apolipoprotein B mrna editing enzyme, catalytic polypeptide-like 4 (putative) [Source:HGNC Symbol;Acc:32152]           |  |
| <b>APOH</b>    | Apolipoprotein H (beta-2-glycoprotein I) [Source:HGNC Symbol;Acc:616]                                                  |  |
| <b>APOLD1</b>  | Apolipoprotein L domain containing 1 [Source:HGNC Symbol;Acc:25268]                                                    |  |
| <b>APOM</b>    | Apolipoprotein M [Source:HGNC Symbol;Acc:13916]                                                                        |  |
| <b>APP</b>     | Amyloid beta (A4) precursor protein [Source:HGNC Symbol;Acc:620]                                                       |  |
| <b>APPBP2</b>  | Amyloid beta precursor protein (cytoplasmic tail) binding protein 2 [Source:HGNC Symbol;Acc:622]                       |  |
| <b>APPL1</b>   | Adaptor protein, phosphotyrosine interaction, PH domain and leucine zipper containing 1 [Source:HGNC Symbol;Acc:24035] |  |
| <b>APRT</b>    | Adenine phosphoribosyltransferase [Source:HGNC Symbol;Acc:626]                                                         |  |
| <b>APTAX</b>   | Aprataxin [Source:HGNC Symbol;Acc:15984]                                                                               |  |
| <b>AQP1</b>    | Aquaporin 1 (Colton blood group) [Source:HGNC Symbol;Acc:633]                                                          |  |
| <b>AQP10</b>   | Aquaporin 10 [Source:HGNC Symbol;Acc:16029]                                                                            |  |
| <b>AQP2</b>    | Aquaporin 2 (collecting duct) [Source:HGNC Symbol;Acc:634]                                                             |  |
| <b>AQP8</b>    | Aquaporin 8 [Source:HGNC Symbol;Acc:642]                                                                               |  |
| <b>AQP9</b>    | Aquaporin 9 [Source:HGNC Symbol;Acc:643]                                                                               |  |
| <b>AQR</b>     | Aquarius homolog (mouse) [Source:HGNC Symbol;Acc:29513]                                                                |  |
| <b>AR</b>      | Androgen receptor [Source:HGNC Symbol;Acc:644]                                                                         |  |
| <b>ARAP2</b>   | Arfgap with rhogap domain, ankyrin repeat and PH domain 2 [Source:HGNC Symbol;Acc:16924]                               |  |
| <b>ARCN1</b>   | Archain 1 [Source:HGNC Symbol;Acc:649]                                                                                 |  |
| <b>ARF3</b>    | ADP-ribosylation factor 3 [Source:HGNC Symbol;Acc:654]                                                                 |  |
| <b>ARFGAP1</b> | ADP-ribosylation factor gtpase activating protein 1 [Source:HGNC Symbol;Acc:15852]                                     |  |
| <b>ARFGAP3</b> | ADP-ribosylation factor gtpase activating protein 3 [Source:HGNC Symbol;Acc:661]                                       |  |
| <b>ARFGEF1</b> | ADP-ribosylation factor guanine nucleotide-exchange factor 1(brefeldin A-inhibited) [Source:HGNC Symbol;Acc:15772]     |  |

|                  |                                                                                                                     |   |
|------------------|---------------------------------------------------------------------------------------------------------------------|---|
| <b>ARFGEF2</b>   | ADP-ribosylation factor guanine nucleotide-exchange factor 2 (brefeldin A-inhibited) [Source:HGNC Symbol;Acc:15853] |   |
| <b>ARFRP1</b>    | ADP-ribosylation factor related protein 1 [Source:HGNC Symbol;Acc:662]                                              |   |
| <b>ARHGAP1</b>   | Rho gtpase activating protein 1 [Source:HGNC Symbol;Acc:673]                                                        |   |
| <b>ARHGAP11A</b> | Rho gtpase activating protein 11A [Source:HGNC Symbol;Acc:15783]                                                    |   |
| <b>ARHGAP18</b>  | Rho gtpase activating protein 18 [Source:HGNC Symbol;Acc:21035]                                                     |   |
| <b>ARHGAP19</b>  | Rho gtpase activating protein 19 [Source:HGNC Symbol;Acc:23724]                                                     |   |
| <b>ARHGAP25</b>  | Rho gtpase activating protein 25 [Source:HGNC Symbol;Acc:28951]                                                     |   |
| <b>ARHGAP26</b>  | Rho gtpase activating protein 26 [Source:HGNC Symbol;Acc:17073]                                                     |   |
| <b>ARHGAP29</b>  | Rho gtpase activating protein 29 [Source:HGNC Symbol;Acc:30207]                                                     |   |
| <b>ARHGAP31</b>  | Rho gtpase activating protein 31 [Source:HGNC Symbol;Acc:29216]                                                     |   |
| <b>ARHGAP32</b>  | Rho gtpase activating protein 32 [Source:HGNC Symbol;Acc:17399]                                                     |   |
| <b>ARHGAP39</b>  | Rho gtpase activating protein 39                                                                                    |   |
| <b>ARHGAP40</b>  | Rho gtpase activating protein 40                                                                                    |   |
| <b>ARHGAP44</b>  | Rho gtpase activating protein 44                                                                                    |   |
| <b>ARHGAP5</b>   | Rho gtpase activating protein 5                                                                                     |   |
| <b>ARHGAP6</b>   | Rho gtpase activating protein 6                                                                                     |   |
| <b>ARHGEF11</b>  | Rho guanine nucleotide exchange factor (GEF) 11                                                                     |   |
| <b>ARHGEF12</b>  | Rho guanine nucleotide exchange factor (GEF) 12                                                                     | √ |
| <b>ARHGEF17</b>  | Rho guanine nucleotide exchange factor (GEF) 17                                                                     |   |
| <b>ARHGEF2</b>   | Rho/Rac guanine nucleotide exchange factor (GEF) 2                                                                  |   |
| <b>ARHGEF37</b>  | Rho guanine nucleotide exchange factor (GEF) 37                                                                     |   |
| <b>ARHGEF38</b>  | Rho guanine nucleotide exchange factor (GEF) 38                                                                     |   |
| <b>ARHGEF4</b>   | Rho guanine nucleotide exchange factor (GEF) 4                                                                      |   |
| <b>ARHGEF5</b>   | Rho guanine nucleotide exchange factor (GEF) 5 [Source:HGNC Symbol;Acc:13209]                                       |   |
| <b>ARHGEF7</b>   | Rho guanine nucleotide exchange factor (GEF) 7 [Source:HGNC Symbol;Acc:15607]                                       |   |
| <b>ARID2</b>     | AT rich interactive domain 2 (ARID, RFX-like)                                                                       | √ |
| <b>ARID3B</b>    | AT rich interactive domain 3B (BRIGHT-like) [Source:HGNC Symbol;Acc:14350]                                          |   |
| <b>ARID4A</b>    | AT rich interactive domain 4A (RBP1-like) [Source:HGNC Symbol;Acc:9885]                                             |   |

|               |                                                                                                               |   |
|---------------|---------------------------------------------------------------------------------------------------------------|---|
| <b>ARID4B</b> | AT rich interactive domain 4B (RBP1-like) [Source:HGNC Symbol;Acc:15550]                                      |   |
| <b>ARIH1</b>  | Ariadne homolog, ubiquitin-conjugating enzyme E2 binding protein, 1 (Drosophila) [Source:HGNC Symbol;Acc:689] |   |
| <b>ARL1</b>   | ADP-ribosylation factor-like 1 [Source:HGNC Symbol;Acc:692]                                                   |   |
| <b>ARL10</b>  | ADP-ribosylation factor-like 10 [Source:HGNC Symbol;Acc:22042]                                                |   |
| <b>ARL14</b>  | ADP-ribosylation factor-like 14 [Source:HGNC Symbol;Acc:22974]                                                |   |
| <b>ARL15</b>  | ADP-ribosylation factor-like 15 [Source:HGNC Symbol;Acc:25945]                                                |   |
| <b>ARL17A</b> | ADP-ribosylation factor-like 17A [Source:HGNC Symbol;Acc:24096]                                               |   |
| <b>ARL17B</b> | ADP-ribosylation factor-like 17B [Source:HGNC Symbol;Acc:32387]                                               |   |
| <b>ARL2BP</b> | ADP-ribosylation factor-like 2 binding protein [Source:HGNC Symbol;Acc:17146]                                 |   |
| <b>ARL4C</b>  | ADP-ribosylation factor-like 4C [Source:HGNC Symbol;Acc:698]                                                  |   |
| <b>ARL4D</b>  | ADP-ribosylation factor-like 4D [Source:HGNC Symbol;Acc:656]                                                  |   |
| <b>ARL5A</b>  | ADP-ribosylation factor-like 5A [Source:HGNC Symbol;Acc:696]                                                  |   |
| <b>ARL8A</b>  | ADP-ribosylation factor-like 8A [Source:HGNC Symbol;Acc:25192]                                                |   |
| <b>ARMC1</b>  | Armadillo repeat containing 1 [Source:HGNC Symbol;Acc:17684]                                                  |   |
| <b>ARMC10</b> | Armadillo repeat containing 10 [Source:HGNC Symbol;Acc:21706]                                                 |   |
| <b>ARMC6</b>  | Armadillo repeat containing 6 [Source:HGNC Symbol;Acc:25049]                                                  |   |
| <b>ARMC7</b>  | Armadillo repeat containing 7 [Source:HGNC Symbol;Acc:26168]                                                  |   |
| <b>ARMC9</b>  | Armadillo repeat containing 9 [Source:HGNC Symbol;Acc:20730]                                                  |   |
| <b>ARMCX1</b> | Armadillo repeat containing, X-linked 1 [Source:HGNC Symbol;Acc:18073]                                        |   |
| <b>ARMCX4</b> | Armadillo repeat containing, X-linked 4 [Source:HGNC Symbol;Acc:28615]                                        |   |
| <b>ARNT</b>   | Aryl hydrocarbon receptor nuclear translocator                                                                | √ |
| <b>ARNT2</b>  | Aryl-hydrocarbon receptor nuclear translocator 2 [Source:HGNC Symbol;Acc:16876]                               |   |
| <b>ARPC1A</b> | Actin related protein 2/3 complex, subunit 1A, 41kda [Source:HGNC Symbol;Acc:703]                             |   |
| <b>ARR3</b>   | Arrestin 3, retinal (X-arrestin) [Source:HGNC Symbol;Acc:710]                                                 |   |
| <b>ARRDC2</b> | Arrestin domain containing 2 [Source:HGNC Symbol;Acc:25225]                                                   |   |
| <b>ARRDC5</b> | Arrestin domain containing 5 [Source:HGNC Symbol;Acc:31407]                                                   |   |
| <b>ARSA</b>   | Arylsulfatase A [Source:HGNC Symbol;Acc:713]                                                                  |   |
| <b>ARSI</b>   | Arylsulfatase family, member I [Source:HGNC Symbol;Acc:32521]                                                 |   |

|               |                                                                                               |  |
|---------------|-----------------------------------------------------------------------------------------------|--|
| <b>ART3</b>   | ADP-ribosyltransferase 3 [Source:HGNC Symbol;Acc:725]                                         |  |
| <b>ART4</b>   | ADP-ribosyltransferase 4 (Dombrock blood group) [Source:HGNC Symbol;Acc:726]                  |  |
| <b>ARV1</b>   | ARV1 homolog (S. Cerevisiae) [Source:HGNC Symbol;Acc:29561]                                   |  |
| <b>ARVCF</b>  | Armadillo repeat gene deleted in velocardiofacial syndrome [Source:HGNC Symbol;Acc:728]       |  |
| <b>ASAH2</b>  | N-acylsphingosine amidohydrolase (non-lysosomal ceramidase) 2 [Source:HGNC Symbol;Acc:18860]  |  |
| <b>ASAH2B</b> | N-acylsphingosine amidohydrolase (non-lysosomal ceramidase) 2B [Source:HGNC Symbol;Acc:23456] |  |
| <b>ASAP2</b>  | Arfgap with SH3 domain, ankyrin repeat and PH domain 2 [Source:HGNC Symbol;Acc:2721]          |  |
| <b>ASB12</b>  | Ankyrin repeat and SOCS box containing 12 [Source:HGNC Symbol;Acc:19763]                      |  |
| <b>ASB13</b>  | Ankyrin repeat and SOCS box containing 13 [Source:HGNC Symbol;Acc:19765]                      |  |
| <b>ASB3</b>   | Ankyrin repeat and SOCS box containing 3 [Source:HGNC Symbol;Acc:16013]                       |  |
| <b>ASB4</b>   | Ankyrin repeat and SOCS box containing 4 [Source:HGNC Symbol;Acc:16009]                       |  |
| <b>ASB7</b>   | Ankyrin repeat and SOCS box containing 7 [Source:HGNC Symbol;Acc:17182]                       |  |
| <b>ASB8</b>   | Ankyrin repeat and SOCS box containing 8 [Source:HGNC Symbol;Acc:17183]                       |  |
| <b>ASCC2</b>  | Activating signal cointegrator 1 complex subunit 2 [Source:HGNC Symbol;Acc:24103]             |  |
| <b>ASCC3</b>  | Activating signal cointegrator 1 complex subunit 3 [Source:HGNC Symbol;Acc:18697]             |  |
| <b>ASH1L</b>  | Ash1 (absent, small, or homeotic)-like (Drosophila) [Source:HGNC Symbol;Acc:19088]            |  |
| <b>ASMTL</b>  | Acetylserotonin O-methyltransferase-like [Source:HGNC Symbol;Acc:751]                         |  |
| <b>ASNA1</b>  | Arsa arsenite transporter, ATP-binding, homolog 1 (bacterial) [Source:HGNC Symbol;Acc:752]    |  |

|                |                                                                                                      |   |
|----------------|------------------------------------------------------------------------------------------------------|---|
| <b>ASNSD1</b>  | Asparagine synthetase domain containing 1 [Source:HGNC Symbol;Acc:24910]                             |   |
| <b>ASPA</b>    | Aspartoacylase [Source:HGNC Symbol;Acc:756]                                                          |   |
| <b>ASPHD1</b>  | Aspartate beta-hydroxylase domain containing 1 [Source:HGNC Symbol;Acc:27380]                        |   |
| <b>ASPHD2</b>  | Aspartate beta-hydroxylase domain containing 2 [Source:HGNC Symbol;Acc:30437]                        |   |
| <b>ASTN2</b>   | Astrotactin 2 [Source:HGNC Symbol;Acc:17021]                                                         |   |
| <b>ASXL1</b>   | Additional sex combs like 1 (Drosophila)                                                             | √ |
| <b>ASXL2</b>   | Additional sex combs like 2 (Drosophila) [Source:HGNC Symbol;Acc:23805]                              |   |
| <b>ATAD2</b>   | Atpase family, AAA domain containing 2 [Source:HGNC Symbol;Acc:30123]                                |   |
| <b>ATAD2B</b>  | Atpase family, AAA domain containing 2B [Source:HGNC Symbol;Acc:29230]                               |   |
| <b>ATAT1</b>   | Alpha tubulin acetyltransferase 1 [Source:HGNC Symbol;Acc:21186]                                     |   |
| <b>ATCAY</b>   | Ataxia, cerebellar, Cayman type [Source:HGNC Symbol;Acc:779]                                         |   |
| <b>ATE1</b>    | Arginyltransferase 1 [Source:HGNC Symbol;Acc:782]                                                    |   |
| <b>ATF4</b>    | Activating transcription factor 4 (tax-responsive enhancer element B67) [Source:HGNC Symbol;Acc:786] |   |
| <b>ATF6</b>    | Activating transcription factor 6 [Source:HGNC Symbol;Acc:791]                                       |   |
| <b>ATF7</b>    | Activating transcription factor 7 [Source:HGNC Symbol;Acc:792]                                       |   |
| <b>ATF7IP2</b> | Activating transcription factor 7 interacting protein 2 [Source:HGNC Symbol;Acc:20397]               |   |
| <b>ATG10</b>   | ATG10 autophagy related 10 homolog (S. Cerevisiae) [Source:HGNC Symbol;Acc:20315]                    |   |
| <b>ATG12</b>   | ATG12 autophagy related 12 homolog (S. Cerevisiae) [Source:HGNC Symbol;Acc:588]                      |   |
| <b>ATG16L1</b> | ATG16 autophagy related 16-like 1 (S. Cerevisiae) [Source:HGNC Symbol;Acc:21498]                     |   |
| <b>ATG2A</b>   | ATG2 autophagy related 2 homolog A (S. Cerevisiae) [Source:HGNC Symbol;Acc:29028]                    |   |

|                |                                                                                                                   |   |
|----------------|-------------------------------------------------------------------------------------------------------------------|---|
| <b>ATG5</b>    | ATG5 autophagy related 5 homolog (S. Cerevisiae) [Source:HGNC Symbol;Acc:589]                                     |   |
| <b>ATG7</b>    | ATG7 autophagy related 7 homolog (S. Cerevisiae) [Source:HGNC Symbol;Acc:16935]                                   |   |
| <b>ATG9A</b>   | ATG9 autophagy related 9 homolog A (S. Cerevisiae) [Source:HGNC Symbol;Acc:22408]                                 |   |
| <b>ATL2</b>    | Atlastin gtpase 2 [Source:HGNC Symbol;Acc:24047]                                                                  |   |
| <b>ATL3</b>    | Atlastin gtpase 3 [Source:HGNC Symbol;Acc:24526]                                                                  |   |
| <b>ATM</b>     | Ataxia telangiectasia mutated                                                                                     | √ |
| <b>ATM</b>     | Ataxia telangiectasia mutated [Source:HGNC Symbol;Acc:795]                                                        |   |
| <b>ATMIN</b>   | ATM interactor [Source:HGNC Symbol;Acc:29034]                                                                     |   |
| <b>ATN1</b>    | Atrophin 1 [Source:HGNC Symbol;Acc:3033]                                                                          |   |
| <b>ATOH7</b>   | Atonal homolog 7 (Drosophila) [Source:HGNC Symbol;Acc:13907]                                                      |   |
| <b>ATOX1</b>   | ATX1 antioxidant protein 1 homolog (yeast) [Source:HGNC Symbol;Acc:798]                                           |   |
| <b>ATP10A</b>  | Atpase, class V, type 10A [Source:HGNC Symbol;Acc:13542]                                                          |   |
| <b>ATP10B</b>  | Atpase, class V, type 10B [Source:HGNC Symbol;Acc:13543]                                                          |   |
| <b>ATP11A</b>  | Atpase, class VI, type 11A [Source:HGNC Symbol;Acc:13552]                                                         |   |
| <b>ATP11B</b>  | Atpase, class VI, type 11B [Source:HGNC Symbol;Acc:13553]                                                         |   |
| <b>ATP11C</b>  | Atpase, class VI, type 11C [Source:HGNC Symbol;Acc:13554]                                                         |   |
| <b>ATP12A</b>  | Atpase, H <sup>+</sup> /K <sup>+</sup> transporting, nongastric, alpha polypeptide [Source:HGNC Symbol;Acc:13816] |   |
| <b>ATP13A2</b> | Atpase type 13A2 [Source:HGNC Symbol;Acc:30213]                                                                   |   |
| <b>ATP13A3</b> | Atpase type 13A3 [Source:HGNC Symbol;Acc:24113]                                                                   |   |
| <b>ATP13A4</b> | Atpase type 13A4 [Source:HGNC Symbol;Acc:25422]                                                                   |   |
| <b>ATP13A5</b> | Atpase type 13A5 [Source:HGNC Symbol;Acc:31789]                                                                   |   |
| <b>ATP1A1</b>  | ATPase, Na <sup>+</sup> /K <sup>+</sup> transporting, α1 polypeptide                                              | √ |
| <b>ATP1A2</b>  | Atpase, Na <sup>+</sup> /K <sup>+</sup> transporting, alpha 2 polypeptide [Source:HGNC Symbol;Acc:800]            |   |
| <b>ATP1A4</b>  | Atpase, Na <sup>+</sup> /K <sup>+</sup> transporting, alpha 4 polypeptide [Source:HGNC Symbol;Acc:14073]          |   |

|                 |                                                                                                                          |  |
|-----------------|--------------------------------------------------------------------------------------------------------------------------|--|
| <b>ATP1B2</b>   | Atpase, Na <sup>+</sup> /K <sup>+</sup> transporting, beta 2 polypeptide [Source:HGNC Symbol;Acc:805]                    |  |
| <b>ATP2A1</b>   | Atpase, Ca <sup>++</sup> transporting, cardiac muscle, fast twitch 1 [Source:HGNC Symbol;Acc:811]                        |  |
| <b>ATP2A2</b>   | Atpase, Ca <sup>++</sup> transporting, cardiac muscle, slow twitch 2 [Source:HGNC Symbol;Acc:812]                        |  |
| <b>ATP2B1</b>   | Atpase, Ca <sup>++</sup> transporting, plasma membrane 1 [Source:HGNC Symbol;Acc:814]                                    |  |
| <b>ATP2C1</b>   | Atpase, Ca <sup>++</sup> transporting, type 2C, member 1 [Source:HGNC Symbol;Acc:13211]                                  |  |
| <b>ATP4A</b>    | Atpase, H <sup>+</sup> /K <sup>+</sup> exchanging, alpha polypeptide [Source:HGNC Symbol;Acc:819]                        |  |
| <b>ATP5B</b>    | ATP synthase, H <sup>+</sup> transporting, mitochondrial F1 complex, beta polypeptide [Source:HGNC Symbol;Acc:830]       |  |
| <b>ATP5E</b>    | ATP synthase, H <sup>+</sup> transporting, mitochondrial F1 complex, epsilon subunit [Source:HGNC Symbol;Acc:838]        |  |
| <b>ATP5F1</b>   | ATP synthase, H <sup>+</sup> transporting, mitochondrial Fo complex, subunit B1 [Source:HGNC Symbol;Acc:840]             |  |
| <b>ATP5G3</b>   | ATP synthase, H <sup>+</sup> transporting, mitochondrial Fo complex, subunit C3 (subunit 9) [Source:HGNC Symbol;Acc:843] |  |
| <b>ATP5L2</b>   | ATP synthase, H <sup>+</sup> transporting, mitochondrial Fo complex, subunit G2 [Source:HGNC Symbol;Acc:13213]           |  |
| <b>ATP5SL</b>   | ATP5S-like [Source:HGNC Symbol;Acc:25496]                                                                                |  |
| <b>ATP6AP1L</b> | Atpase, H <sup>+</sup> transporting, lysosomal accessory protein 1-like [Source:HGNC Symbol;Acc:28091]                   |  |
| <b>ATP6V0A1</b> | Atpase, H <sup>+</sup> transporting, lysosomal V0 subunit a1 [Source:HGNC Symbol;Acc:865]                                |  |
| <b>ATP6V0A2</b> | Atpase, H <sup>+</sup> transporting, lysosomal V0 subunit a2 [Source:HGNC Symbol;Acc:18481]                              |  |
| <b>ATP6V0E2</b> | Atpase, H <sup>+</sup> transporting V0 subunit e2 [Source:HGNC Symbol;Acc:21723]                                         |  |
| <b>ATP6V1D</b>  | Atpase, H <sup>+</sup> transporting, lysosomal 34kda, V1 subunit D [Source:HGNC Symbol;Acc:13527]                        |  |

|                 |                                                                                                         |   |
|-----------------|---------------------------------------------------------------------------------------------------------|---|
| <b>ATP6V1G2</b> | Atpase, H <sup>+</sup> transporting, lysosomal 13kda, V1 subunit G2 [Source:HGNC Symbol;Acc:862]        |   |
| <b>ATP7B</b>    | Atpase, Cu <sup>++</sup> transporting, beta polypeptide [Source:HGNC Symbol;Acc:870]                    |   |
| <b>ATP8A1</b>   | Atpase, aminophospholipid transporter (APLT), class I, type 8A, member 1 [Source:HGNC Symbol;Acc:13531] |   |
| <b>ATP8A2</b>   | Atpase, aminophospholipid transporter, class I, type 8A, member 2 [Source:HGNC Symbol;Acc:13533]        |   |
| <b>ATP8B1</b>   | Atpase, aminophospholipid transporter, class I, type 8B, member 1 [Source:HGNC Symbol;Acc:3706]         |   |
| <b>ATP9A</b>    | Atpase, class II, type 9A [Source:HGNC Symbol;Acc:13540]                                                |   |
| <b>ATP9B</b>    | Atpase, class II, type 9B [Source:HGNC Symbol;Acc:13541]                                                |   |
| <b>ATPAF1</b>   | ATP synthase mitochondrial F1 complex assembly factor 1 [Source:HGNC Symbol;Acc:18803]                  |   |
| <b>ATPAF2</b>   | ATP synthase mitochondrial F1 complex assembly factor 2 [Source:HGNC Symbol;Acc:18802]                  |   |
| <b>ATR</b>      | Ataxia telangiectasia and Rad3 related [Source:HGNC Symbol;Acc:882]                                     |   |
| <b>ATRN</b>     | Attractin [Source:HGNC Symbol;Acc:885]                                                                  |   |
| <b>ATRNL1</b>   | Attractin-like 1 [Source:HGNC Symbol;Acc:29063]                                                         |   |
| <b>ATRX</b>     | Alpha thalassemia/mental retardation syndrome X-linked                                                  | √ |
| <b>ATXN1</b>    | Ataxin 1 [Source:HGNC Symbol;Acc:10548]                                                                 |   |
| <b>ATXN3</b>    | Ataxin 3 [Source:HGNC Symbol;Acc:7106]                                                                  |   |
| <b>ATXN7</b>    | Ataxin 7 [Source:HGNC Symbol;Acc:10560]                                                                 |   |
| <b>ATXN7L1</b>  | Ataxin 7-like 1 [Source:HGNC Symbol;Acc:22210]                                                          |   |
| <b>AUP1</b>     | Ancient ubiquitous protein 1 [Source:HGNC Symbol;Acc:891]                                               |   |
| <b>AVL9</b>     | AVL9 homolog (S. Cerevisiae) [Source:HGNC Symbol;Acc:28994]                                             |   |
| <b>AVPR2</b>    | Arginine vasopressin receptor 2 [Source:HGNC Symbol;Acc:897]                                            |   |
| <b>AWAT2</b>    | Acyl-coa wax alcohol acyltransferase 2 [Source:HGNC Symbol;Acc:23251]                                   |   |
| <b>AXIN1</b>    | Axin 1                                                                                                  | √ |
| <b>AXL</b>      | AXL receptor tyrosine kinase [Source:HGNC Symbol;Acc:905]                                               |   |
| <b>AZIN1</b>    | Antizyme inhibitor 1 [Source:HGNC Symbol;Acc:16432]                                                     |   |
| <b>B3GALNT1</b> | Beta-1,3-N-acetylgalactosaminyltransferase 1 (globoside blood group) [Source:HGNC Symbol;Acc:918]       |   |



|                 |                                                                                                                     |  |
|-----------------|---------------------------------------------------------------------------------------------------------------------|--|
| <b>B3GALNT2</b> | Beta-1,3-N-acetylgalactosaminyltransferase 2 [Source:HGNC Symbol;Acc:28596]                                         |  |
| <b>B3GALT2</b>  | UDP-Gal:betaglcnac beta 1,3-galactosyltransferase, polypeptide 2 [Source:HGNC Symbol;Acc:917]                       |  |
| <b>B3GALT5</b>  | UDP-Gal:betaglcnac beta 1,3-galactosyltransferase, polypeptide 5 [Source:HGNC Symbol;Acc:920]                       |  |
| <b>B3GNT4</b>   | UDP-glcnac:betagal beta-1,3-N-acetylglucosaminyltransferase 4 [Source:HGNC Symbol;Acc:15683]                        |  |
| <b>B3GNT5</b>   | UDP-glcnac:betagal beta-1,3-N-acetylglucosaminyltransferase 5 [Source:HGNC Symbol;Acc:15684]                        |  |
| <b>B3GNTL1</b>  | UDP-glcnac:betagal beta-1,3-N-acetylglucosaminyltransferase-like 1 [Source:HGNC Symbol;Acc:21727]                   |  |
| <b>B4GALT1</b>  | UDP-Gal:betaglcnac beta 1,4- galactosyltransferase, polypeptide 1 [Source:HGNC Symbol;Acc:924]                      |  |
| <b>B4GALT3</b>  | UDP-Gal:betaglcnac beta 1,4- galactosyltransferase, polypeptide 3 [Source:HGNC Symbol;Acc:926]                      |  |
| <b>B4GALT5</b>  | UDP-Gal:betaglcnac beta 1,4- galactosyltransferase, polypeptide 5 [Source:HGNC Symbol;Acc:928]                      |  |
| <b>B4GALT6</b>  | UDP-Gal:betaglcnac beta 1,4- galactosyltransferase, polypeptide 6 [Source:HGNC Symbol;Acc:929]                      |  |
| <b>B4GALT7</b>  | Xylosylprotein beta 1,4-galactosyltransferase, polypeptide 7 (galactosyltransferase I) [Source:HGNC Symbol;Acc:930] |  |
| <b>B9D2</b>     | B9 protein domain 2 [Source:HGNC Symbol;Acc:28636]                                                                  |  |
| <b>BACH1</b>    | BTB and CNC homology 1, basic leucine zipper transcription factor 1 [Source:HGNC Symbol;Acc:935]                    |  |
| <b>BACH2</b>    | BTB and CNC homology 1, basic leucine zipper transcription factor 2 [Source:HGNC Symbol;Acc:14078]                  |  |
| <b>BAHD1</b>    | Bromo adjacent homology domain containing 1 [Source:HGNC Symbol;Acc:29153]                                          |  |
| <b>BAI2</b>     | Brain-specific angiogenesis inhibitor 2 [Source:HGNC Symbol;Acc:944]                                                |  |
| <b>BAI3</b>     | Brain-specific angiogenesis inhibitor 3 [Source:HGNC Symbol;Acc:945]                                                |  |
| <b>BAIAP2</b>   | BAI1-associated protein 2 [Source:HGNC Symbol;Acc:947]                                                              |  |
| <b>BAK1</b>     | BCL2-antagonist/killer 1 [Source:HGNC Symbol;Acc:949]                                                               |  |

|                |                                                                                                                    |   |
|----------------|--------------------------------------------------------------------------------------------------------------------|---|
| <b>BANF1</b>   | Barrier to autointegration factor 1 [Source:HGNC Symbol;Acc:17397]                                                 |   |
| <b>BAP1</b>    | BRCA1 associated protein-1 (ubiquitin carboxy-terminal hydrolase)                                                  | √ |
| <b>BARD1</b>   | BRCA1 associated RING domain 1 [Source:HGNC Symbol;Acc:952]                                                        |   |
| <b>BARHL2</b>  | Barh-like homeobox 2 [Source:HGNC Symbol;Acc:954]                                                                  |   |
| <b>BAZ1B</b>   | Bromodomain adjacent to zinc finger domain, 1B [Source:HGNC Symbol;Acc:961]                                        |   |
| <b>BAZ2A</b>   | Bromodomain adjacent to zinc finger domain, 2A [Source:HGNC Symbol;Acc:962]                                        |   |
| <b>BAZ2B</b>   | Bromodomain adjacent to zinc finger domain, 2B [Source:HGNC Symbol;Acc:963]                                        |   |
| <b>BBOX1</b>   | Butyrobetaine (gamma), 2-oxoglutarate dioxygenase (gamma-butyrobetaine hydroxylase) 1 [Source:HGNC Symbol;Acc:964] |   |
| <b>BBS1</b>    | Bardet-Biedl syndrome 1 [Source:HGNC Symbol;Acc:966]                                                               |   |
| <b>BBS10</b>   | Bardet-Biedl syndrome 10 [Source:HGNC Symbol;Acc:26291]                                                            |   |
| <b>BBS12</b>   | Bardet-Biedl syndrome 12 [Source:HGNC Symbol;Acc:26648]                                                            |   |
| <b>BBS5</b>    | Bardet-Biedl syndrome 5 [Source:HGNC Symbol;Acc:970]                                                               |   |
| <b>BBX</b>     | Bobby sox homolog (Drosophila) [Source:HGNC Symbol;Acc:14422]                                                      |   |
| <b>BCAN</b>    | Brevican [Source:HGNC Symbol;Acc:23059]                                                                            |   |
| <b>BCAP29</b>  | B-cell receptor-associated protein 29 [Source:HGNC Symbol;Acc:24131]                                               |   |
| <b>BCAR1</b>   | Breast cancer anti-estrogen resistance 1 [Source:HGNC Symbol;Acc:971]                                              |   |
| <b>BCAS1</b>   | Breast carcinoma amplified sequence 1 [Source:HGNC Symbol;Acc:974]                                                 |   |
| <b>BCAS3</b>   | Breast carcinoma amplified sequence 3 [Source:HGNC Symbol;Acc:14347]                                               |   |
| <b>BCAT1</b>   | Branched chain amino-acid transaminase 1, cytosolic [Source:HGNC Symbol;Acc:976]                                   |   |
| <b>BCKDHB</b>  | Branched chain keto acid dehydrogenase E1, beta polypeptide [Source:HGNC Symbol;Acc:987]                           |   |
| <b>BCKDK</b>   | Branched chain ketoacid dehydrogenase kinase [Source:HGNC Symbol;Acc:16902]                                        |   |
| <b>BCL11A</b>  | B-cell CLL/lymphoma 11A (zinc finger protein)                                                                      | √ |
| <b>BCL11B</b>  | B-cell CLL/lymphoma 11B (zinc finger protein)                                                                      | √ |
| <b>BCL2L1</b>  | BCL2-like 1 [Source:HGNC Symbol;Acc:992]                                                                           |   |
| <b>BCL2L11</b> | BCL2-like 11 (apoptosis facilitator) [Source:HGNC Symbol;Acc:994]                                                  |   |
| <b>BCL2L12</b> | BCL2-like 12 (proline rich) [Source:HGNC Symbol;Acc:13787]                                                         |   |

|               |                                                                                                                     |   |
|---------------|---------------------------------------------------------------------------------------------------------------------|---|
| <b>BCL2L2</b> | BCL2-like 2 [Source:HGNC Symbol;Acc:995]                                                                            |   |
| <b>BCL3</b>   | B-cell CLL/lymphoma 3 [Source:HGNC Symbol;Acc:998]                                                                  | √ |
| <b>BCL6</b>   | B-cell CLL/lymphoma 6 [Source:HGNC Symbol;Acc:1001]                                                                 | √ |
| <b>BCL6B</b>  | B-cell CLL/lymphoma 6, member B [Source:HGNC Symbol;Acc:1002]                                                       |   |
| <b>BCL9L</b>  | B-cell CLL/lymphoma 9-like [Source:HGNC Symbol;Acc:23688]                                                           |   |
| <b>BCOR</b>   | BCL6 corepressor [Source:HGNC Symbol;Acc:20893]                                                                     | √ |
| <b>BCR</b>    | Breakpoint cluster region                                                                                           | √ |
| <b>BCS1L</b>  | BCS1-like ( <i>S. Cerevisiae</i> ) [Source:HGNC Symbol;Acc:1020]                                                    |   |
| <b>BDP1</b>   | B double prime 1, subunit of RNA polymerase III transcription initiation factor IIIB [Source:HGNC Symbol;Acc:13652] |   |
| <b>BEND2</b>  | BEN domain containing 2 [Source:HGNC Symbol;Acc:28509]                                                              |   |
| <b>BEND3</b>  | BEN domain containing 3 [Source:HGNC Symbol;Acc:23040]                                                              |   |
| <b>BEND4</b>  | BEN domain containing 4 [Source:HGNC Symbol;Acc:23815]                                                              |   |
| <b>BEND5</b>  | BEN domain containing 5 [Source:HGNC Symbol;Acc:25668]                                                              |   |
| <b>BEST2</b>  | Bestrophin 2 [Source:HGNC Symbol;Acc:17107]                                                                         |   |
| <b>BEST3</b>  | Bestrophin 3 [Source:HGNC Symbol;Acc:17105]                                                                         |   |
| <b>BEX2</b>   | Brain expressed X-linked 2 [Source:HGNC Symbol;Acc:30933]                                                           |   |
| <b>BFAR</b>   | Bifunctional apoptosis regulator [Source:HGNC Symbol;Acc:17613]                                                     |   |
| <b>BFSP2</b>  | Beaded filament structural protein 2, phakinin [Source:HGNC Symbol;Acc:1041]                                        |   |
| <b>BHLHB9</b> | Basic helix-loop-helix domain containing, class B, 9 [Source:HGNC Symbol;Acc:29353]                                 |   |
| <b>BICC1</b>  | Bicaudal C homolog 1 ( <i>Drosophila</i> ) [Source:HGNC Symbol;Acc:19351]                                           |   |
| <b>BICD2</b>  | Bicaudal D homolog 2 ( <i>Drosophila</i> ) [Source:HGNC Symbol;Acc:17208]                                           |   |
| <b>BIN1</b>   | Bridging integrator 1 [Source:HGNC Symbol;Acc:1052]                                                                 |   |
| <b>BIRC6</b>  | Baculoviral IAP repeat containing 6 [Source:HGNC Symbol;Acc:13516]                                                  |   |
| <b>BIRC7</b>  | Baculoviral IAP repeat containing 7 [Source:HGNC Symbol;Acc:13702]                                                  |   |
| <b>BLM</b>    | Bloom syndrome, recq helicase-like                                                                                  | √ |
| <b>BLMH</b>   | Bleomycin hydrolase [Source:HGNC Symbol;Acc:1059]                                                                   |   |
| <b>BLVRB</b>  | Biliverdin reductase B (flavin reductase (NADPH)) [Source:HGNC Symbol;Acc:1063]                                     |   |
| <b>BMP1</b>   | Bone morphogenetic protein 1 [Source:HGNC Symbol;Acc:1067]                                                          |   |
| <b>BMP7</b>   | Bone morphogenetic protein 7 [Source:HGNC Symbol;Acc:1074]                                                          |   |

|               |                                                                                                                                 |   |
|---------------|---------------------------------------------------------------------------------------------------------------------------------|---|
| <b>BMP8B</b>  | Bone morphogenetic protein 8b [Source:HGNC Symbol;Acc:1075]                                                                     |   |
| <b>BMPER</b>  | BMP binding endothelial regulator [Source:HGNC Symbol;Acc:24154]                                                                |   |
| <b>BMPR1A</b> | Bone morphogenetic protein receptor, type IA                                                                                    | √ |
| <b>BMPR2</b>  | Bone morphogenetic protein receptor, type II (serine/threonine kinase) [Source:HGNC Symbol;Acc:1078]                            |   |
| <b>BMS1</b>   | BMS1 homolog, ribosome assembly protein (yeast) [Source:HGNC Symbol;Acc:23505]                                                  |   |
| <b>BMX</b>    | BMX non-receptor tyrosine kinase [Source:HGNC Symbol;Acc:1079]                                                                  |   |
| <b>BNC2</b>   | Basonuclin 2 [Source:HGNC Symbol;Acc:30988]                                                                                     |   |
| <b>BNIP1</b>  | BCL2/adenovirus E1B 19kda interacting protein 1 [Source:HGNC Symbol;Acc:1082]                                                   |   |
| <b>BNIP2</b>  | BCL2/adenovirus E1B 19kda interacting protein 2 [Source:HGNC Symbol;Acc:1083]                                                   |   |
| <b>BNIPL</b>  | BCL2/adenovirus E1B 19kd interacting protein like [Source:HGNC Symbol;Acc:16976]                                                |   |
| <b>BOK</b>    | BCL2-related ovarian killer [Source:HGNC Symbol;Acc:1087]                                                                       |   |
| <b>BOLA2</b>  | Bola homolog 2 (E. Coli) [Source:HGNC Symbol;Acc:29488]                                                                         |   |
| <b>BOLA2B</b> | Bola homolog 2B (E. Coli) [Source:HGNC Symbol;Acc:32479]                                                                        |   |
| <b>BOLL</b>   | Bol, boule-like (Drosophila) [Source:HGNC Symbol;Acc:14273]                                                                     |   |
| <b>BOP1</b>   | Block of proliferation 1 [Source:HGNC Symbol;Acc:15519]                                                                         |   |
| <b>BPNT1</b>  | 3'(2'), 5'-bisphosphate nucleotidase 1 [Source:HGNC Symbol;Acc:1096]                                                            |   |
| <b>BPTF</b>   | Bromodomain PHD finger transcription factor [Source:HGNC Symbol;Acc:3581]                                                       |   |
| <b>BRAF</b>   | V-raf murine sarcoma viral oncogene homolog B1                                                                                  | √ |
| <b>BRAP</b>   | BRCA1 associated protein [Source:HGNC Symbol;Acc:1099]                                                                          |   |
| <b>BRCA1</b>  | Breast cancer 1, early onset                                                                                                    | √ |
| <b>BRCA2</b>  | Breast cancer 2, early onset [Source:HGNC Symbol;Acc:1101]                                                                      |   |
| <b>BRD1</b>   | Bromodomain containing 1 [Source:HGNC Symbol;Acc:1102]                                                                          |   |
| <b>BRD4</b>   | Bromodomain containing 4                                                                                                        | √ |
| <b>BRD7</b>   | Bromodomain containing 7 [Source:HGNC Symbol;Acc:14310]                                                                         |   |
| <b>BRD8</b>   | Bromodomain containing 8 [Source:HGNC Symbol;Acc:19874]                                                                         |   |
| <b>BRF1</b>   | BRF1 homolog, subunit of RNA polymerase III transcription initiation factor IIIB (S. Cerevisiae) [Source:HGNC Symbol;Acc:11551] |   |

|               |                                                                                                                                                |   |
|---------------|------------------------------------------------------------------------------------------------------------------------------------------------|---|
| <b>BRPF1</b>  | Bromodomain and PHD finger containing, 1 [Source:HGNC Symbol;Acc:14255]                                                                        |   |
| <b>BRS3</b>   | Bombesin-like receptor 3 [Source:HGNC Symbol;Acc:1113]                                                                                         |   |
| <b>BRWD1</b>  | Bromodomain and WD repeat domain containing 1 [Source:HGNC Symbol;Acc:12760]                                                                   |   |
| <b>BRWD3</b>  | Bromodomain and WD repeat domain containing 3 [Source:HGNC Symbol;Acc:17342]                                                                   |   |
| <b>BSCL2</b>  | Berardinelli-Seip congenital lipodystrophy 2 (seipin) [Source:HGNC Symbol;Acc:15832]                                                           |   |
| <b>BSDC1</b>  | BSD domain containing 1 [Source:HGNC Symbol;Acc:25501]                                                                                         |   |
| <b>BSG</b>    | Basigin (Ok blood group) [Source:HGNC Symbol;Acc:1116]                                                                                         |   |
| <b>BSN</b>    | Bassoon (presynaptic cytomatrix protein) [Source:HGNC Symbol;Acc:1117]                                                                         |   |
| <b>BSPRY</b>  | B-box and SPRY domain containing [Source:HGNC Symbol;Acc:18232]                                                                                |   |
| <b>BTA1F1</b> | BTA1F1 RNA polymerase II, B-TFIID transcription factor-associated, 170kda (Mot1 homolog, <i>S. Cerevisiae</i> ) [Source:HGNC Symbol;Acc:17307] |   |
| <b>BTBD10</b> | BTB (POZ) domain containing 10 [Source:HGNC Symbol;Acc:21445]                                                                                  |   |
| <b>BTBD11</b> | BTB (POZ) domain containing 11 [Source:HGNC Symbol;Acc:23844]                                                                                  |   |
| <b>BTBD3</b>  | BTB (POZ) domain containing 3 [Source:HGNC Symbol;Acc:15854]                                                                                   |   |
| <b>BTBD6</b>  | BTB (POZ) domain containing 6 [Source:HGNC Symbol;Acc:19897]                                                                                   |   |
| <b>BTBD7</b>  | BTB (POZ) domain containing 7 [Source:HGNC Symbol;Acc:18269]                                                                                   |   |
| <b>BTBD8</b>  | BTB (POZ) domain containing 8 [Source:HGNC Symbol;Acc:21019]                                                                                   |   |
| <b>BTBD9</b>  | BTB (POZ) domain containing 9 [Source:HGNC Symbol;Acc:21228]                                                                                   |   |
| <b>BTDD</b>   | Biotinidase [Source:HGNC Symbol;Acc:1122]                                                                                                      |   |
| <b>BTG1</b>   | B-cell translocation gene 1, anti-proliferative                                                                                                | √ |
| <b>BTN3A1</b> | Butyrophilin, subfamily 3, member A1 [Source:HGNC Symbol;Acc:1138]                                                                             |   |
| <b>BTN3A2</b> | Butyrophilin, subfamily 3, member A2 [Source:HGNC Symbol;Acc:1139]                                                                             |   |
| <b>BTN3A3</b> | Butyrophilin, subfamily 3, member A3 [Source:HGNC Symbol;Acc:1140]                                                                             |   |
| <b>BTNL8</b>  | Butyrophilin-like 8 [Source:HGNC Symbol;Acc:26131]                                                                                             |   |
| <b>BTRC</b>   | Beta-transducin repeat containing [Source:HGNC Symbol;Acc:1144]                                                                                |   |
| <b>BUB1B</b>  | Budding uninhibited by benzimidazoles 1 homolog beta (yeast) [Source:HGNC Symbol;Acc:1149]                                                     | √ |

|                  |                                                                                       |  |
|------------------|---------------------------------------------------------------------------------------|--|
| <b>BUB3</b>      | Budding uninhibited by benzimidazoles 3 homolog (yeast) [Source:HGNC Symbol;Acc:1151] |  |
| <b>BVES</b>      | Blood vessel epicardial substance [Source:HGNC Symbol;Acc:1152]                       |  |
| <b>BZW1</b>      | Basic leucine zipper and W2 domains 1 [Source:HGNC Symbol;Acc:18380]                  |  |
| <b>C10orf108</b> | Chromosome 10 open reading frame 108 [Source:HGNC Symbol;Acc:30724]                   |  |
| <b>C10orf113</b> | Chromosome 10 open reading frame 113 [Source:HGNC Symbol;Acc:31447]                   |  |
| <b>C10orf116</b> | Chromosome 10 open reading frame 116 [Source:HGNC Symbol;Acc:24043]                   |  |
| <b>C10orf128</b> | Chromosome 10 open reading frame 128 [Source:HGNC Symbol;Acc:27274]                   |  |
| <b>C10orf136</b> | Chromosome 10 open reading frame 136 [Source:HGNC Symbol;Acc:31657]                   |  |
| <b>C10orf18</b>  | Chromosome 10 open reading frame 18 [Source:HGNC Symbol;Acc:23484]                    |  |
| <b>C10orf25</b>  | Chromosome 10 open reading frame 25 [Source:HGNC Symbol;Acc:23509]                    |  |
| <b>C10orf28</b>  | Chromosome 10 open reading frame 28 [Source:HGNC Symbol;Acc:23512]                    |  |
| <b>C10orf58</b>  | Chromosome 10 open reading frame 58 [Source:HGNC Symbol;Acc:28651]                    |  |
| <b>C10orf67</b>  | Chromosome 10 open reading frame 67 [Source:HGNC Symbol;Acc:28716]                    |  |
| <b>C10orf88</b>  | Chromosome 10 open reading frame 88 [Source:HGNC Symbol;Acc:25822]                    |  |
| <b>C10orf90</b>  | Chromosome 10 open reading frame 90 [Source:HGNC Symbol;Acc:26563]                    |  |
| <b>C10orf95</b>  | Chromosome 10 open reading frame 95 [Source:HGNC Symbol;Acc:25880]                    |  |
| <b>C10orf99</b>  | Chromosome 10 open reading frame 99 [Source:HGNC Symbol;Acc:31428]                    |  |

|                 |                                                                    |  |
|-----------------|--------------------------------------------------------------------|--|
| <b>C11orf30</b> | Chromosome 11 open reading frame 30 [Source:HGNC Symbol;Acc:18071] |  |
| <b>C11orf34</b> | Chromosome 11 open reading frame 34 [Source:HGNC Symbol;Acc:30053] |  |
| <b>C11orf36</b> | Chromosome 11 open reading frame 36 [Source:HGNC Symbol;Acc:26691] |  |
| <b>C11orf39</b> | Chromosome 11 open reading frame 39 [Source:HGNC Symbol;Acc:32293] |  |
| <b>C11orf41</b> | Chromosome 11 open reading frame 41 [Source:HGNC Symbol;Acc:24836] |  |
| <b>C11orf44</b> | Chromosome 11 open reading frame 44 [Source:HGNC Symbol;Acc:26805] |  |
| <b>C11orf46</b> | Chromosome 11 open reading frame 46 [Source:HGNC Symbol;Acc:26798] |  |
| <b>C11orf61</b> | Chromosome 11 open reading frame 61 [Source:HGNC Symbol;Acc:26266] |  |
| <b>C11orf68</b> | Chromosome 11 open reading frame 68 [Source:HGNC Symbol;Acc:28801] |  |
| <b>C11orf72</b> | Chromosome 11 open reading frame 72 [Source:HGNC Symbol;Acc:26915] |  |
| <b>C11orf82</b> | Chromosome 11 open reading frame 82 [Source:HGNC Symbol;Acc:26351] |  |
| <b>C11orf87</b> | Chromosome 11 open reading frame 87 [Source:HGNC Symbol;Acc:33788] |  |
| <b>C11orf9</b>  | Chromosome 11 open reading frame 9 [Source:HGNC Symbol;Acc:1181]   |  |
| <b>C11orf90</b> | Chromosome 11 open reading frame 90 [Source:HGNC Symbol;Acc:34443] |  |
| <b>C12orf24</b> | Chromosome 12 open reading frame 24 [Source:HGNC Symbol;Acc:30180] |  |
| <b>C12orf29</b> | Chromosome 12 open reading frame 29 [Source:HGNC Symbol;Acc:25322] |  |
| <b>C12orf35</b> | Chromosome 12 open reading frame 35 [Source:HGNC Symbol;Acc:25559] |  |

|                  |                                                                     |  |
|------------------|---------------------------------------------------------------------|--|
| <b>C12orf41</b>  | Chromosome 12 open reading frame 41 [Source:HGNC Symbol;Acc:26024]  |  |
| <b>C12orf50</b>  | Chromosome 12 open reading frame 50 [Source:HGNC Symbol;Acc:26665]  |  |
| <b>C12orf51</b>  | Chromosome 12 open reading frame 51 [Source:HGNC Symbol;Acc:26611]  |  |
| <b>C12orf53</b>  | Chromosome 12 open reading frame 53 [Source:HGNC Symbol;Acc:25338]  |  |
| <b>C12orf63</b>  | Chromosome 12 open reading frame 63 [Source:HGNC Symbol;Acc:24777]  |  |
| <b>C12orf68</b>  | Chromosome 12 open reading frame 68 [Source:HGNC Symbol;Acc:33749]  |  |
| <b>C12orf76</b>  | Chromosome 12 open reading frame 76 [Source:HGNC Symbol;Acc:33790]  |  |
| <b>C13orf23</b>  | Chromosome 13 open reading frame 23 [Source:HGNC Symbol;Acc:20291]  |  |
| <b>C13orf27</b>  | Chromosome 13 open reading frame 27 [Source:HGNC Symbol;Acc:25188]  |  |
| <b>C13orf28</b>  | Chromosome 13 open reading frame 28 [Source:HGNC Symbol;Acc:29575]  |  |
| <b>C13orf30</b>  | Chromosome 13 open reading frame 30 [Source:HGNC Symbol;Acc:26883]  |  |
| <b>C13orf34</b>  | Chromosome 13 open reading frame 34 [Source:HGNC Symbol;Acc:24724]  |  |
| <b>C13orf36</b>  | Chromosome 13 open reading frame 36 [Source:HGNC Symbol;Acc:33792]  |  |
| <b>C13orf40</b>  | Chromosome 13 open reading frame 40 [Source:HGNC Symbol;Acc:26851]  |  |
| <b>C14orf102</b> | Chromosome 14 open reading frame 102 [Source:HGNC Symbol;Acc:20186] |  |
| <b>C14orf129</b> | Chromosome 14 open reading frame 129 [Source:HGNC Symbol;Acc:20343] |  |



|                  |                                                                     |   |
|------------------|---------------------------------------------------------------------|---|
| <b>C14orf135</b> | Chromosome 14 open reading frame 135 [Source:HGNC Symbol;Acc:20349] |   |
| <b>C14orf144</b> | Chromosome 14 open reading frame 144 [Source:HGNC Symbol;Acc:20358] |   |
| <b>C14orf162</b> | Chromosome 14 open reading frame 162 [Source:HGNC Symbol;Acc:23243] |   |
| <b>C14orf167</b> | Chromosome 14 open reading frame 167 [Source:HGNC Symbol;Acc:23175] |   |
| <b>C14orf177</b> | Chromosome 14 open reading frame 177 [Source:HGNC Symbol;Acc:26375] |   |
| <b>C14orf21</b>  | Chromosome 14 open reading frame 21 [Source:HGNC Symbol;Acc:19826]  |   |
| <b>C14orf37</b>  | Chromosome 14 open reading frame 37 [Source:HGNC Symbol;Acc:19846]  |   |
| <b>C14orf43</b>  | Chromosome 14 open reading frame 43 [Source:HGNC Symbol;Acc:19853]  |   |
| <b>C14orf57</b>  | Chromosome 14 open reading frame 57 [Source:HGNC Symbol;Acc:20104]  |   |
| <b>C15orf17</b>  | Chromosome 15 open reading frame 17 [Source:HGNC Symbol;Acc:24695]  |   |
| <b>C15orf39</b>  | Chromosome 15 open reading frame 39 [Source:HGNC Symbol;Acc:24497]  |   |
| <b>C15orf41</b>  | Chromosome 15 open reading frame 41 [Source:HGNC Symbol;Acc:26929]  |   |
| <b>C15orf42</b>  | Chromosome 15 open reading frame 42 [Source:HGNC Symbol;Acc:28704]  |   |
| <b>C15orf53</b>  | Chromosome 15 open reading frame 53 [Source:HGNC Symbol;Acc:33796]  |   |
| <b>C15orf55</b>  | Chromosome 15 open reading frame 55                                 | √ |
| <b>C15orf56</b>  | Chromosome 15 open reading frame 56 [Source:HGNC Symbol;Acc:33868]  |   |
| <b>C16orf46</b>  | Chromosome 16 open reading frame 46 [Source:HGNC Symbol;Acc:26525]  |   |

|                  |                                                                     |  |
|------------------|---------------------------------------------------------------------|--|
| <b>C16orf58</b>  | Chromosome 16 open reading frame 58 [Source:HGNC Symbol;Acc:25848]  |  |
| <b>C16orf70</b>  | Chromosome 16 open reading frame 70 [Source:HGNC Symbol;Acc:29564]  |  |
| <b>C16orf85</b>  | Chromosome 16 open reading frame 85 [Source:HGNC Symbol;Acc:33799]  |  |
| <b>C16orf86</b>  | Chromosome 16 open reading frame 86 [Source:HGNC Symbol;Acc:33755]  |  |
| <b>C17orf104</b> | Chromosome 17 open reading frame 104 [Source:HGNC Symbol;Acc:26670] |  |
| <b>C17orf28</b>  | Chromosome 17 open reading frame 28 [Source:HGNC Symbol;Acc:15736]  |  |
| <b>C17orf39</b>  | Chromosome 17 open reading frame 39 [Source:HGNC Symbol;Acc:28453]  |  |
| <b>C17orf42</b>  | Chromosome 17 open reading frame 42 [Source:HGNC Symbol;Acc:26223]  |  |
| <b>C17orf51</b>  | Chromosome 17 open reading frame 51 [Source:HGNC Symbol;Acc:27904]  |  |
| <b>C17orf53</b>  | Chromosome 17 open reading frame 53 [Source:HGNC Symbol;Acc:28460]  |  |
| <b>C17orf57</b>  | Chromosome 17 open reading frame 57 [Source:HGNC Symbol;Acc:26864]  |  |
| <b>C17orf59</b>  | Chromosome 17 open reading frame 59 [Source:HGNC Symbol;Acc:25939]  |  |
| <b>C17orf63</b>  | Chromosome 17 open reading frame 63 [Source:HGNC Symbol;Acc:25563]  |  |
| <b>C17orf70</b>  | Chromosome 17 open reading frame 70 [Source:HGNC Symbol;Acc:26171]  |  |
| <b>C17orf72</b>  | Chromosome 17 open reading frame 72 [Source:HGNC Symbol;Acc:25673]  |  |
| <b>C17orf85</b>  | Chromosome 17 open reading frame 85 [Source:HGNC Symbol;Acc:24612]  |  |
| <b>C18orf1</b>   | Chromosome 18 open reading frame 1 [Source:HGNC Symbol;Acc:1224]    |  |

|                 |                                                                                                                    |  |
|-----------------|--------------------------------------------------------------------------------------------------------------------|--|
| <b>C18orf19</b> | Chromosome 18 open reading frame 19 [Source:HGNC Symbol;Acc:28346]                                                 |  |
| <b>C18orf34</b> | Chromosome 18 open reading frame 34 [Source:HGNC Symbol;Acc:29588]                                                 |  |
| <b>C18orf45</b> | Chromosome 18 open reading frame 45 [Source:HGNC Symbol;Acc:31723]                                                 |  |
| <b>C19orf18</b> | Chromosome 19 open reading frame 18 [Source:HGNC Symbol;Acc:28642]                                                 |  |
| <b>C19orf25</b> | Chromosome 19 open reading frame 25 [Source:HGNC Symbol;Acc:26711]                                                 |  |
| <b>C19orf28</b> | Chromosome 19 open reading frame 28 [Source:HGNC Symbol;Acc:28299]                                                 |  |
| <b>C19orf29</b> | Chromosome 19 open reading frame 29 [Source:HGNC Symbol;Acc:29938]                                                 |  |
| <b>C19orf38</b> | Chromosome 19 open reading frame 38 [Source:HGNC Symbol;Acc:34073]                                                 |  |
| <b>C19orf44</b> | Chromosome 19 open reading frame 44 [Source:HGNC Symbol;Acc:26141]                                                 |  |
| <b>C19orf47</b> | Chromosome 19 open reading frame 47 [Source:HGNC Symbol;Acc:26723]                                                 |  |
| <b>C19orf51</b> | Chromosome 19 open reading frame 51 [Source:HGNC Symbol;Acc:30492]                                                 |  |
| <b>C19orf54</b> | Chromosome 19 open reading frame 54 [Source:HGNC Symbol;Acc:24758]                                                 |  |
| <b>C19orf59</b> | Chromosome 19 open reading frame 59 [Source:HGNC Symbol;Acc:27291]                                                 |  |
| <b>C19orf63</b> | Chromosome 19 open reading frame 63 [Source:HGNC Symbol;Acc:27609]                                                 |  |
| <b>C19orf75</b> | Chromosome 19 open reading frame 75 [Source:HGNC Symbol;Acc:26856]                                                 |  |
| <b>C1D</b>      | C1D nuclear receptor corepressor [Source:HGNC Symbol;Acc:29911]                                                    |  |
| <b>C1GALT1</b>  | Core 1 synthase, glycoprotein-N-acetylgalactosamine 3-beta-galactosyltransferase, 1 [Source:HGNC Symbol;Acc:24337] |  |

|                 |                                                                    |  |
|-----------------|--------------------------------------------------------------------|--|
| <b>C1orf115</b> | Chromosome 1 open reading frame 115 [Source:HGNC Symbol;Acc:25873] |  |
| <b>C1orf116</b> | Chromosome 1 open reading frame 116 [Source:HGNC Symbol;Acc:28667] |  |
| <b>C1orf129</b> | Chromosome 1 open reading frame 129 [Source:HGNC Symbol;Acc:26287] |  |
| <b>C1orf131</b> | Chromosome 1 open reading frame 131 [Source:HGNC Symbol;Acc:25332] |  |
| <b>C1orf132</b> | Chromosome 1 open reading frame 132 [Source:HGNC Symbol;Acc:32018] |  |
| <b>C1orf135</b> | Chromosome 1 open reading frame 135 [Source:HGNC Symbol;Acc:28363] |  |
| <b>C1orf158</b> | Chromosome 1 open reading frame 158 [Source:HGNC Symbol;Acc:28567] |  |
| <b>C1orf167</b> | Chromosome 1 open reading frame 167 [Source:HGNC Symbol;Acc:25262] |  |
| <b>C1orf168</b> | Chromosome 1 open reading frame 168 [Source:HGNC Symbol;Acc:27295] |  |
| <b>C1orf170</b> | Chromosome 1 open reading frame 170 [Source:HGNC Symbol;Acc:28208] |  |
| <b>C1orf183</b> | Chromosome 1 open reading frame 183 [Source:HGNC Symbol;Acc:28045] |  |
| <b>C1orf185</b> | Chromosome 1 open reading frame 185 [Source:HGNC Symbol;Acc:28096] |  |
| <b>C1orf187</b> | Chromosome 1 open reading frame 187 [Source:HGNC Symbol;Acc:25054] |  |
| <b>C1orf190</b> | Chromosome 1 open reading frame 190 [Source:HGNC Symbol;Acc:32327] |  |
| <b>C1orf21</b>  | Chromosome 1 open reading frame 21 [Source:HGNC Symbol;Acc:15494]  |  |
| <b>C1orf216</b> | Chromosome 1 open reading frame 216 [Source:HGNC Symbol;Acc:26800] |  |
| <b>C1orf222</b> | Chromosome 1 open reading frame 222 [Source:HGNC Symbol;Acc:27917] |  |

|                  |                                                                                      |  |
|------------------|--------------------------------------------------------------------------------------|--|
| <b>C1orf226</b>  | Chromosome 1 open reading frame 226 [Source:HGNC Symbol;Acc:34351]                   |  |
| <b>C1orf49</b>   | Chromosome 1 open reading frame 49 [Source:HGNC Symbol;Acc:25366]                    |  |
| <b>C1orf53</b>   | Chromosome 1 open reading frame 53 [Source:HGNC Symbol;Acc:30003]                    |  |
| <b>C1orf54</b>   | Chromosome 1 open reading frame 54 [Source:HGNC Symbol;Acc:26258]                    |  |
| <b>C1orf55</b>   | Chromosome 1 open reading frame 55 [Source:HGNC Symbol;Acc:26643]                    |  |
| <b>C1orf68</b>   | Chromosome 1 open reading frame 68 [Source:HGNC Symbol;Acc:29468]                    |  |
| <b>C1orf69</b>   | Chromosome 1 open reading frame 69 [Source:HGNC Symbol;Acc:27302]                    |  |
| <b>C1orf74</b>   | Chromosome 1 open reading frame 74 [Source:HGNC Symbol;Acc:26319]                    |  |
| <b>C1orf77</b>   | Chromosome 1 open reading frame 77 [Source:HGNC Symbol;Acc:24511]                    |  |
| <b>C1orf86</b>   | Chromosome 1 open reading frame 86 [Source:HGNC Symbol;Acc:26428]                    |  |
| <b>C1orf88</b>   | Chromosome 1 open reading frame 88 [Source:HGNC Symbol;Acc:27009]                    |  |
| <b>C1orf95</b>   | Chromosome 1 open reading frame 95 [Source:HGNC Symbol;Acc:30491]                    |  |
| <b>C1QBP</b>     | Complement component 1, q subcomponent binding protein [Source:HGNC Symbol;Acc:1243] |  |
| <b>C1QTNF6</b>   | C1q and tumor necrosis factor related protein 6 [Source:HGNC Symbol;Acc:14343]       |  |
| <b>C20orf106</b> | Chromosome 20 open reading frame 106 [Source:HGNC Symbol;Acc:16100]                  |  |
| <b>C20orf107</b> | Chromosome 20 open reading frame 107 [Source:HGNC Symbol;Acc:16101]                  |  |
| <b>C20orf11</b>  | Chromosome 20 open reading frame 11 [Source:HGNC Symbol;Acc:15857]                   |  |
| <b>C20orf111</b> | Chromosome 20 open reading frame 111 [Source:HGNC Symbol;Acc:16105]                  |  |
| <b>C20orf12</b>  | Chromosome 20 open reading frame 12 [Source:HGNC Symbol;Acc:15858]                   |  |
| <b>C20orf152</b> | Chromosome 20 open reading frame 152 [Source:HGNC Symbol;Acc:16145]                  |  |
| <b>C20orf181</b> | Chromosome 20 open reading frame 181 [Source:HGNC Symbol;Acc:16174]                  |  |
| <b>C20orf185</b> | Chromosome 20 open reading frame 185 [Source:HGNC Symbol;Acc:16178]                  |  |

|                  |                                                                         |  |
|------------------|-------------------------------------------------------------------------|--|
| <b>C20orf194</b> | Chromosome 20 open reading frame 194 [Source:HGNC Symbol;Acc:17721]     |  |
| <b>C20orf29</b>  | Chromosome 20 open reading frame 29 [Source:HGNC Symbol;Acc:15875]      |  |
| <b>C20orf4</b>   | Chromosome 20 open reading frame 4 [Source:HGNC Symbol;Acc:15886]       |  |
| <b>C20orf71</b>  | Chromosome 20 open reading frame 71 [Source:HGNC Symbol;Acc:16204]      |  |
| <b>C21orf2</b>   | Chromosome 21 open reading frame 2 [Source:HGNC Symbol;Acc:1260]        |  |
| <b>C21orf33</b>  | Chromosome 21 open reading frame 33 [Source:HGNC Symbol;Acc:1273]       |  |
| <b>C21orf37</b>  | Chromosome 21 open reading frame 37 [Source:HGNC Symbol;Acc:1277]       |  |
| <b>C21orf58</b>  | Chromosome 21 open reading frame 58 [Source:HGNC Symbol;Acc:1300]       |  |
| <b>C21orf59</b>  | Chromosome 21 open reading frame 59 [Source:HGNC Symbol;Acc:1301]       |  |
| <b>C21orf62</b>  | Chromosome 21 open reading frame 62 [Source:HGNC Symbol;Acc:1305]       |  |
| <b>C21orf91</b>  | Chromosome 21 open reading frame 91 [Source:HGNC Symbol;Acc:16459]      |  |
| <b>C22orf23</b>  | Chromosome 22 open reading frame 23 [Source:HGNC Symbol;Acc:18589]      |  |
| <b>C22orf25</b>  | Chromosome 22 open reading frame 25 [Source:HGNC Symbol;Acc:25439]      |  |
| <b>C22orf26</b>  | Chromosome 22 open reading frame 26 [Source:HGNC Symbol;Acc:25606]      |  |
| <b>C22orf31</b>  | Chromosome 22 open reading frame 31 [Source:HGNC Symbol;Acc:26931]      |  |
| <b>C22orf34</b>  | Chromosome 22 open reading frame 34 [Source:HGNC Symbol;Acc:28010]      |  |
| <b>C22orf40</b>  | Chromosome 22 open reading frame 40 [Source:HGNC Symbol;Acc:33710]      |  |
| <b>C22orf46</b>  | Chromosome 22 open reading frame 46 [Source:HGNC Symbol;Acc:26294]      |  |
| <b>C2CD2</b>     | C2 calcium-dependent domain containing 2 [Source:HGNC Symbol;Acc:1266]  |  |
| <b>C2CD3</b>     | C2 calcium-dependent domain containing 3 [Source:HGNC Symbol;Acc:24564] |  |

|                |                                                                             |   |
|----------------|-----------------------------------------------------------------------------|---|
| <b>C2CD4A</b>  | C2 calcium-dependent domain containing 4A [Source:HGNC Symbol;Acc:33627]    |   |
| <b>C2orf15</b> | Chromosome 2 open reading frame 15 [Source:HGNC Symbol;Acc:28436]           |   |
| <b>C2orf18</b> | Chromosome 2 open reading frame 18 [Source:HGNC Symbol;Acc:26055]           |   |
| <b>C2orf24</b> | Chromosome 2 open reading frame 24 [Source:HGNC Symbol;Acc:25220]           |   |
| <b>C2orf42</b> | Chromosome 2 open reading frame 42 [Source:HGNC Symbol;Acc:26056]           |   |
| <b>C2orf43</b> | Chromosome 2 open reading frame 43 [Source:HGNC Symbol;Acc:26145]           |   |
| <b>C2orf44</b> | Chromosome 2 open reading frame 44                                          | √ |
| <b>C2orf48</b> | Chromosome 2 open reading frame 48 [Source:HGNC Symbol;Acc:26322]           |   |
| <b>C2orf49</b> | Chromosome 2 open reading frame 49 [Source:HGNC Symbol;Acc:28772]           |   |
| <b>C2orf55</b> | Chromosome 2 open reading frame 55 [Source:HGNC Symbol;Acc:33454]           |   |
| <b>C2orf57</b> | Chromosome 2 open reading frame 57 [Source:HGNC Symbol;Acc:28563]           |   |
| <b>C2orf63</b> | Chromosome 2 open reading frame 63 [Source:HGNC Symbol;Acc:26453]           |   |
| <b>C2orf69</b> | Chromosome 2 open reading frame 69 [Source:HGNC Symbol;Acc:26799]           |   |
| <b>C2orf82</b> | Chromosome 2 open reading frame 82 [Source:HGNC Symbol;Acc:33763]           |   |
| <b>C2orf89</b> | Chromosome 2 open reading frame 89 [Source:HGNC Symbol;Acc:27013]           |   |
| <b>C3</b>      | Complement component 3 [Source:HGNC Symbol;Acc:1318]                        |   |
| <b>C3orf10</b> | Chromosome 3 open reading frame 10 [Source:HGNC Symbol;Acc:23057]           |   |
| <b>C3orf14</b> | Chromosome 3 open reading frame 14 [Source:HGNC Symbol;Acc:25024]           |   |
| <b>C3orf17</b> | Chromosome 3 open reading frame 17 [Source:HGNC Symbol;Acc:24496]           |   |
| <b>C3orf21</b> | Chromosome 3 open reading frame 21 [Source:HGNC Symbol;Acc:26639]           |   |
| <b>C3orf26</b> | Chromosome 3 open reading frame 26 [Source:HGNC Symbol;Acc:28666]           |   |
| <b>C3orf31</b> | Chromosome 3 open reading frame 31 [Source:HGNC Symbol;Acc:25187]           |   |
| <b>C3orf35</b> | Chromosome 3 open reading frame 35 [Source:HGNC Symbol;Acc:24082]           |   |
| <b>C3orf48</b> | Chromosome 3 open reading frame 48 [Source:HGNC Symbol;Acc:28406]           |   |
| <b>C3orf57</b> | Chromosome 3 open reading frame 57 [Source:HGNC Symbol;Acc:24045]           |   |
| <b>C3orf58</b> | Chromosome 3 open reading frame 58 [Source:HGNC Symbol;Acc:28490]           |   |
| <b>C3orf67</b> | Chromosome 3 open reading frame 67 [Source:HGNC Symbol;Acc:24763]           |   |
| <b>C3orf78</b> | Chromosome 3 open reading frame 78 [Source:HGNC Symbol;Acc:37257]           |   |
| <b>C4A</b>     | Complement component 4A (Rodgers blood group) [Source:HGNC Symbol;Acc:1323] |   |
| <b>C4B</b>     | Complement component 4B (Chido blood group) [Source:HGNC Symbol;Acc:1324]   |   |

|                 |                                                                             |  |
|-----------------|-----------------------------------------------------------------------------|--|
| <b>C4BPA</b>    | Complement component 4 binding protein, alpha [Source:HGNC Symbol;Acc:1325] |  |
| <b>C4orf21</b>  | Chromosome 4 open reading frame 21 [Source:HGNC Symbol;Acc:25654]           |  |
| <b>C4orf31</b>  | Chromosome 4 open reading frame 31 [Source:HGNC Symbol;Acc:26256]           |  |
| <b>C4orf33</b>  | Chromosome 4 open reading frame 33 [Source:HGNC Symbol;Acc:27025]           |  |
| <b>C4orf36</b>  | Chromosome 4 open reading frame 36 [Source:HGNC Symbol;Acc:28386]           |  |
| <b>C4orf40</b>  | Chromosome 4 open reading frame 40 [Source:HGNC Symbol;Acc:33193]           |  |
| <b>C5AR1</b>    | Complement component 5a receptor 1 [Source:HGNC Symbol;Acc:1338]            |  |
| <b>C5orf13</b>  | Chromosome 5 open reading frame 13 [Source:HGNC Symbol;Acc:16834]           |  |
| <b>C5orf15</b>  | Chromosome 5 open reading frame 15 [Source:HGNC Symbol;Acc:20656]           |  |
| <b>C5orf17</b>  | Chromosome 5 open reading frame 17 [Source:HGNC Symbol;Acc:26630]           |  |
| <b>C5orf25</b>  | Chromosome 5 open reading frame 25 [Source:HGNC Symbol;Acc:24779]           |  |
| <b>C5orf28</b>  | Chromosome 5 open reading frame 28 [Source:HGNC Symbol;Acc:26139]           |  |
| <b>C5orf41</b>  | Chromosome 5 open reading frame 41 [Source:HGNC Symbol;Acc:24050]           |  |
| <b>C5orf42</b>  | Chromosome 5 open reading frame 42 [Source:HGNC Symbol;Acc:25801]           |  |
| <b>C5orf43</b>  | Chromosome 5 open reading frame 43 [Source:HGNC Symbol;Acc:33861]           |  |
| <b>C5orf45</b>  | Chromosome 5 open reading frame 45 [Source:HGNC Symbol;Acc:30817]           |  |
| <b>C5orf47</b>  | Chromosome 5 open reading frame 47 [Source:HGNC Symbol;Acc:27026]           |  |
| <b>C5orf51</b>  | Chromosome 5 open reading frame 51 [Source:HGNC Symbol;Acc:27750]           |  |
| <b>C5orf56</b>  | Chromosome 5 open reading frame 56 [Source:HGNC Symbol;Acc:33838]           |  |
| <b>C5orf58</b>  | Chromosome 5 open reading frame 58 [Source:HGNC Symbol;Acc:37272]           |  |
| <b>C5orf60</b>  | Chromosome 5 open reading frame 60 [Source:HGNC Symbol;Acc:27753]           |  |
| <b>C6orf106</b> | Chromosome 6 open reading frame 106 [Source:HGNC Symbol;Acc:21215]          |  |
| <b>C6orf115</b> | Chromosome 6 open reading frame 115 [Source:HGNC Symbol;Acc:21230]          |  |
| <b>C6orf118</b> | Chromosome 6 open reading frame 118 [Source:HGNC Symbol;Acc:21233]          |  |
| <b>C6orf132</b> | Chromosome 6 open reading frame 132 [Source:HGNC Symbol;Acc:21288]          |  |
| <b>C6orf141</b> | Chromosome 6 open reading frame 141 [Source:HGNC Symbol;Acc:21351]          |  |



|                 |                                                                         |  |
|-----------------|-------------------------------------------------------------------------|--|
| <b>C6orf145</b> | Chromosome 6 open reading frame 145 [Source:HGNC Symbol;Acc:21361]      |  |
| <b>C6orf164</b> | Chromosome 6 open reading frame 164 [Source:HGNC Symbol;Acc:21404]      |  |
| <b>C6orf170</b> | Chromosome 6 open reading frame 170 [Source:HGNC Symbol;Acc:21485]      |  |
| <b>C6orf174</b> | Chromosome 6 open reading frame 174 [Source:HGNC Symbol;Acc:21494]      |  |
| <b>C6orf191</b> | Chromosome 6 open reading frame 191 [Source:HGNC Symbol;Acc:21571]      |  |
| <b>C6orf192</b> | Chromosome 6 open reading frame 192 [Source:HGNC Symbol;Acc:21573]      |  |
| <b>C6orf201</b> | Chromosome 6 open reading frame 201 [Source:HGNC Symbol;Acc:21620]      |  |
| <b>C6orf204</b> | Chromosome 6 open reading frame 204 [Source:HGNC Symbol;Acc:21638]      |  |
| <b>C6orf27</b>  | Chromosome 6 open reading frame 27 [Source:HGNC Symbol;Acc:13939]       |  |
| <b>C6orf35</b>  | Chromosome 6 open reading frame 35 [Source:HGNC Symbol;Acc:17206]       |  |
| <b>C6orf48</b>  | Chromosome 6 open reading frame 48 [Source:HGNC Symbol;Acc:19078]       |  |
| <b>C6orf64</b>  | Chromosome 6 open reading frame 64 [Source:HGNC Symbol;Acc:21025]       |  |
| <b>C6orf81</b>  | Chromosome 6 open reading frame 81 [Source:HGNC Symbol;Acc:21099]       |  |
| <b>C7</b>       | Complement component 7 [Source:HGNC Symbol;Acc:1346]                    |  |
| <b>C7orf13</b>  | Chromosome 7 open reading frame 13 [Source:HGNC Symbol;Acc:17126]       |  |
| <b>C7orf16</b>  | Chromosome 7 open reading frame 16 [Source:HGNC Symbol;Acc:16973]       |  |
| <b>C7orf29</b>  | Chromosome 7 open reading frame 29 [Source:HGNC Symbol;Acc:21720]       |  |
| <b>C7orf52</b>  | Chromosome 7 open reading frame 52 [Source:HGNC Symbol;Acc:22030]       |  |
| <b>C7orf58</b>  | Chromosome 7 open reading frame 58 [Source:HGNC Symbol;Acc:26159]       |  |
| <b>C7orf63</b>  | Chromosome 7 open reading frame 63 [Source:HGNC Symbol;Acc:26107]       |  |
| <b>C7orf71</b>  | Chromosome 7 open reading frame 71 [Source:HGNC Symbol;Acc:22364]       |  |
| <b>C8A</b>      | Complement component 8, alpha polypeptide [Source:HGNC Symbol;Acc:1352] |  |
| <b>C8B</b>      | Complement component 8, beta polypeptide [Source:HGNC Symbol;Acc:1353]  |  |

|                 |                                                                         |  |
|-----------------|-------------------------------------------------------------------------|--|
| <b>C8G</b>      | Complement component 8, gamma polypeptide [Source:HGNC Symbol;Acc:1354] |  |
| <b>C8orf12</b>  | Chromosome 8 open reading frame 12 [Source:HGNC Symbol;Acc:15548]       |  |
| <b>C8orf31</b>  | Chromosome 8 open reading frame 31 [Source:HGNC Symbol;Acc:26731]       |  |
| <b>C8orf37</b>  | Chromosome 8 open reading frame 37 [Source:HGNC Symbol;Acc:27232]       |  |
| <b>C8orf47</b>  | Chromosome 8 open reading frame 47 [Source:HGNC Symbol;Acc:26823]       |  |
| <b>C8orf55</b>  | Chromosome 8 open reading frame 55 [Source:HGNC Symbol;Acc:29656]       |  |
| <b>C8orf80</b>  | Chromosome 8 open reading frame 80 [Source:HGNC Symbol;Acc:33550]       |  |
| <b>C8orf82</b>  | Chromosome 8 open reading frame 82 [Source:HGNC Symbol;Acc:33826]       |  |
| <b>C9orf102</b> | Chromosome 9 open reading frame 102 [Source:HGNC Symbol;Acc:26922]      |  |
| <b>C9orf114</b> | Chromosome 9 open reading frame 114 [Source:HGNC Symbol;Acc:26933]      |  |
| <b>C9orf116</b> | Chromosome 9 open reading frame 116 [Source:HGNC Symbol;Acc:28435]      |  |
| <b>C9orf117</b> | Chromosome 9 open reading frame 117 [Source:HGNC Symbol;Acc:27843]      |  |
| <b>C9orf125</b> | Chromosome 9 open reading frame 125 [Source:HGNC Symbol;Acc:28180]      |  |
| <b>C9orf140</b> | Chromosome 9 open reading frame 140 [Source:HGNC Symbol;Acc:28055]      |  |
| <b>C9orf150</b> | Chromosome 9 open reading frame 150 [Source:HGNC Symbol;Acc:31452]      |  |
| <b>C9orf156</b> | Chromosome 9 open reading frame 156 [Source:HGNC Symbol;Acc:30967]      |  |
| <b>C9orf163</b> | Chromosome 9 open reading frame 163 [Source:HGNC Symbol;Acc:26718]      |  |
| <b>C9orf167</b> | Chromosome 9 open reading frame 167 [Source:HGNC Symbol;Acc:25981]      |  |
| <b>C9orf174</b> | Chromosome 9 open reading frame 174 [Source:HGNC Symbol;Acc:29303]      |  |
| <b>C9orf25</b>  | Chromosome 9 open reading frame 25 [Source:HGNC Symbol;Acc:19920]       |  |
| <b>C9orf3</b>   | Chromosome 9 open reading frame 3 [Source:HGNC Symbol;Acc:1361]         |  |

|                |                                                                                            |  |
|----------------|--------------------------------------------------------------------------------------------|--|
| <b>C9orf35</b> | Chromosome 9 open reading frame 35 [Source:HGNC Symbol;Acc:23388]                          |  |
| <b>C9orf38</b> | Chromosome 9 open reading frame 38 [Source:HGNC Symbol;Acc:23398]                          |  |
| <b>C9orf41</b> | Chromosome 9 open reading frame 41 [Source:HGNC Symbol;Acc:23435]                          |  |
| <b>C9orf47</b> | Chromosome 9 open reading frame 47 [Source:HGNC Symbol;Acc:23669]                          |  |
| <b>C9orf64</b> | Chromosome 9 open reading frame 64 [Source:HGNC Symbol;Acc:28144]                          |  |
| <b>C9orf68</b> | Chromosome 9 open reading frame 68 [Source:HGNC Symbol;Acc:25472]                          |  |
| <b>C9orf7</b>  | Chromosome 9 open reading frame 7 [Source:HGNC Symbol;Acc:1365]                            |  |
| <b>C9orf71</b> | Chromosome 9 open reading frame 71 [Source:HGNC Symbol;Acc:28537]                          |  |
| <b>C9orf72</b> | Chromosome 9 open reading frame 72 [Source:HGNC Symbol;Acc:28337]                          |  |
| <b>C9orf84</b> | Chromosome 9 open reading frame 84 [Source:HGNC Symbol;Acc:26535]                          |  |
| <b>C9orf89</b> | Chromosome 9 open reading frame 89 [Source:HGNC Symbol;Acc:28148]                          |  |
| <b>C9orf93</b> | Chromosome 9 open reading frame 93 [Source:HGNC Symbol;Acc:29828]                          |  |
| <b>C9orf96</b> | Chromosome 9 open reading frame 96 [Source:HGNC Symbol;Acc:28669]                          |  |
| <b>CA12</b>    | Carbonic anhydrase XII [Source:HGNC Symbol;Acc:1371]                                       |  |
| <b>CA13</b>    | Carbonic anhydrase XIII [Source:HGNC Symbol;Acc:14914]                                     |  |
| <b>CA14</b>    | Carbonic anhydrase XIV [Source:HGNC Symbol;Acc:1372]                                       |  |
| <b>CA2</b>     | Carbonic anhydrase II [Source:HGNC Symbol;Acc:1373]                                        |  |
| <b>CA5B</b>    | Carbonic anhydrase VB, mitochondrial [Source:HGNC Symbol;Acc:1378]                         |  |
| <b>CA7</b>     | Carbonic anhydrase VII [Source:HGNC Symbol;Acc:1381]                                       |  |
| <b>CA8</b>     | Carbonic anhydrase VIII [Source:HGNC Symbol;Acc:1382]                                      |  |
| <b>CAB39</b>   | Calcium binding protein 39 [Source:HGNC Symbol;Acc:20292]                                  |  |
| <b>CABIN1</b>  | Calcineurin binding protein 1 [Source:HGNC Symbol;Acc:24187]                               |  |
| <b>CABLES1</b> | Cdk5 and Abl enzyme substrate 1 [Source:HGNC Symbol;Acc:25097]                             |  |
| <b>CABP1</b>   | Calcium binding protein 1 [Source:HGNC Symbol;Acc:1384]                                    |  |
| <b>CABP4</b>   | Calcium binding protein 4 [Source:HGNC Symbol;Acc:1386]                                    |  |
| <b>CABP7</b>   | Calcium binding protein 7 [Source:HGNC Symbol;Acc:20834]                                   |  |
| <b>CABS1</b>   | Calcium-binding protein, spermatid-specific 1 [Source:HGNC Symbol;Acc:30710]               |  |
| <b>CACHD1</b>  | Cache domain containing 1 [Source:HGNC Symbol;Acc:29314]                                   |  |
| <b>CACNA1C</b> | Calcium channel, voltage-dependent, L type, alpha 1C subunit [Source:HGNC Symbol;Acc:1390] |  |
| <b>CACNA1E</b> | Calcium channel, voltage-dependent, R type, alpha 1E subunit [Source:HGNC Symbol;Acc:1392] |  |

|                 |                                                                                                                |  |
|-----------------|----------------------------------------------------------------------------------------------------------------|--|
| <b>CACNA1F</b>  | Calcium channel, voltage-dependent, L type, alpha 1F subunit [Source:HGNC Symbol;Acc:1393]                     |  |
| <b>CACNA1G</b>  | Calcium channel, voltage-dependent, T type, alpha 1G subunit [Source:HGNC Symbol;Acc:1394]                     |  |
| <b>CACNA1H</b>  | Calcium channel, voltage-dependent, T type, alpha 1H subunit [Source:HGNC Symbol;Acc:1395]                     |  |
| <b>CACNA1I</b>  | Calcium channel, voltage-dependent, T type, alpha 1I subunit [Source:HGNC Symbol;Acc:1396]                     |  |
| <b>CACNA1S</b>  | Calcium channel, voltage-dependent, L type, alpha 1S subunit [Source:HGNC Symbol;Acc:1397]                     |  |
| <b>CACNA2D2</b> | Calcium channel, voltage-dependent, alpha 2/delta subunit 2 [Source:HGNC Symbol;Acc:1400]                      |  |
| <b>CACNA2D3</b> | Calcium channel, voltage-dependent, alpha 2/delta subunit 3 [Source:HGNC Symbol;Acc:15460]                     |  |
| <b>CACNA2D4</b> | Calcium channel, voltage-dependent, alpha 2/delta subunit 4 [Source:HGNC Symbol;Acc:20202]                     |  |
| <b>CACNB2</b>   | Calcium channel, voltage-dependent, beta 2 subunit [Source:HGNC Symbol;Acc:1402]                               |  |
| <b>CACNB3</b>   | Calcium channel, voltage-dependent, beta 3 subunit [Source:HGNC Symbol;Acc:1403]                               |  |
| <b>CACNG1</b>   | Calcium channel, voltage-dependent, gamma subunit 1 [Source:HGNC Symbol;Acc:1405]                              |  |
| <b>CACNG3</b>   | Calcium channel, voltage-dependent, gamma subunit 3 [Source:HGNC Symbol;Acc:1407]                              |  |
| <b>CACNG8</b>   | Calcium channel, voltage-dependent, gamma subunit 8 [Source:HGNC Symbol;Acc:13628]                             |  |
| <b>CAD</b>      | Carbamoyl-phosphate synthetase 2, aspartate transcarbamylase, and dihydroorotase [Source:HGNC Symbol;Acc:1424] |  |
| <b>CADM1</b>    | Cell adhesion molecule 1 [Source:HGNC Symbol;Acc:5951]                                                         |  |
| <b>CADM2</b>    | Cell adhesion molecule 2 [Source:HGNC Symbol;Acc:29849]                                                        |  |
| <b>CAGE1</b>    | Cancer antigen 1 [Source:HGNC Symbol;Acc:21622]                                                                |  |
| <b>CALB1</b>    | Calbindin 1, 28kda [Source:HGNC Symbol;Acc:1434]                                                               |  |
| <b>CALCB</b>    | Calcitonin-related polypeptide beta [Source:HGNC Symbol;Acc:1438]                                              |  |

|                 |                                                                                           |   |
|-----------------|-------------------------------------------------------------------------------------------|---|
| <b>CALCOCO2</b> | Calcium binding and coiled-coil domain 2 [Source:HGNC Symbol;Acc:29912]                   |   |
| <b>CALCRL</b>   | Calcitonin receptor-like [Source:HGNC Symbol;Acc:16709]                                   |   |
| <b>CALD1</b>    | Caldesmon 1 [Source:HGNC Symbol;Acc:1441]                                                 |   |
| <b>CALM1</b>    | Calmodulin 1 (phosphorylase kinase, delta) [Source:HGNC Symbol;Acc:1442]                  |   |
| <b>CALML4</b>   | Calmodulin-like 4 [Source:HGNC Symbol;Acc:18445]                                          |   |
| <b>CALML6</b>   | Calmodulin-like 6 [Source:HGNC Symbol;Acc:24193]                                          |   |
| <b>CALN1</b>    | Calneuron 1 [Source:HGNC Symbol;Acc:13248]                                                |   |
| <b>CALU</b>     | Calumenin [Source:HGNC Symbol;Acc:1458]                                                   |   |
| <b>CAMK1D</b>   | Calcium/calmodulin-dependent protein kinase ID [Source:HGNC Symbol;Acc:19341]             |   |
| <b>CAMK2D</b>   | Calcium/calmodulin-dependent protein kinase II delta [Source:HGNC Symbol;Acc:1462]        |   |
| <b>CAMK2G</b>   | Calcium/calmodulin-dependent protein kinase II gamma [Source:HGNC Symbol;Acc:1463]        |   |
| <b>CAMKK1</b>   | Calcium/calmodulin-dependent protein kinase kinase 1, alpha [Source:HGNC Symbol;Acc:1469] |   |
| <b>CAMKV</b>    | Cam kinase-like vesicle-associated [Source:HGNC Symbol;Acc:28788]                         |   |
| <b>CAMSAP1</b>  | Calmodulin regulated spectrin-associated protein 1 [Source:HGNC Symbol;Acc:19946]         |   |
| <b>CAMTA1</b>   | Calmodulin binding transcription activator 1                                              | √ |
| <b>CAND1</b>    | Cullin-associated and neddylation-dissociated 1 [Source:HGNC Symbol;Acc:30688]            |   |
| <b>CAND2</b>    | Cullin-associated and neddylation-dissociated 2 (putative) [Source:HGNC Symbol;Acc:30689] |   |
| <b>CAPN1</b>    | Calpain 1, (mu/I) large subunit [Source:HGNC Symbol;Acc:1476]                             |   |
| <b>CAPN12</b>   | Calpain 12 [Source:HGNC Symbol;Acc:13249]                                                 |   |
| <b>CAPN7</b>    | Calpain 7 [Source:HGNC Symbol;Acc:1484]                                                   |   |
| <b>CAPRN2</b>   | Caprin family member 2 [Source:HGNC Symbol;Acc:21259]                                     |   |
| <b>CAPS</b>     | Calcyphosine [Source:HGNC Symbol;Acc:1487]                                                |   |
| <b>CAPZA3</b>   | Capping protein (actin filament) muscle Z-line, alpha 3 [Source:HGNC Symbol;Acc:24205]    |   |

|                 |                                                                                                                 |   |
|-----------------|-----------------------------------------------------------------------------------------------------------------|---|
| <b>CARD11</b>   | Caspase recruitment domain family, member 11 [Source:HGNC Symbol;Acc:16393]                                     | √ |
| <b>CARD14</b>   | Caspase recruitment domain family, member 14 [Source:HGNC Symbol;Acc:16446]                                     |   |
| <b>CARD8</b>    | Caspase recruitment domain family, member 8 [Source:HGNC Symbol;Acc:17057]                                      |   |
| <b>CARD9</b>    | Caspase recruitment domain family, member 9 [Source:HGNC Symbol;Acc:16391]                                      |   |
| <b>CARM1</b>    | Coactivator-associated arginine methyltransferase 1 [Source:HGNC Symbol;Acc:23393]                              |   |
| <b>CARS</b>     | Cysteinyl-trna synthetase [Source:HGNC Symbol;Acc:1493]                                                         | √ |
| <b>CASC4</b>    | Cancer susceptibility candidate 4 [Source:HGNC Symbol;Acc:24892]                                                |   |
| <b>CASC5</b>    | Cancer susceptibility candidate 5 [Source:HGNC Symbol;Acc:24054]                                                |   |
| <b>CASD1</b>    | CAS1 domain containing 1 [Source:HGNC Symbol;Acc:16014]                                                         |   |
| <b>CASK</b>     | Calcium/calmodulin-dependent serine protein kinase (MAGUK family) [Source:HGNC Symbol;Acc:1497]                 |   |
| <b>CASKIN1</b>  | CASK interacting protein 1 [Source:HGNC Symbol;Acc:20879]                                                       |   |
| <b>CASP1</b>    | Caspase 1, apoptosis-related cysteine peptidase (interleukin 1, beta, convertase) [Source:HGNC Symbol;Acc:1499] |   |
| <b>CASP2</b>    | Caspase 2, apoptosis-related cysteine peptidase [Source:HGNC Symbol;Acc:1503]                                   |   |
| <b>CASP6</b>    | Caspase 6, apoptosis-related cysteine peptidase [Source:HGNC Symbol;Acc:1507]                                   |   |
| <b>CASP8AP2</b> | Caspase 8 associated protein 2 [Source:HGNC Symbol;Acc:1510]                                                    |   |
| <b>CASP9</b>    | Caspase 9, apoptosis-related cysteine peptidase [Source:HGNC Symbol;Acc:1511]                                   |   |
| <b>CASQ1</b>    | Calsequestrin 1 (fast-twitch, skeletal muscle) [Source:HGNC Symbol;Acc:1512]                                    |   |
| <b>CASQ2</b>    | Calsequestrin 2 (cardiac muscle) [Source:HGNC Symbol;Acc:1513]                                                  |   |
| <b>CASR</b>     | Calcium-sensing receptor [Source:HGNC Symbol;Acc:1514]                                                          |   |
| <b>CASS4</b>    | Cas scaffolding protein family member 4 [Source:HGNC Symbol;Acc:15878]                                          |   |
| <b>CAST</b>     | Calpastatin [Source:HGNC Symbol;Acc:1515]                                                                       |   |

|                 |                                                                              |   |
|-----------------|------------------------------------------------------------------------------|---|
| <b>CASZ1</b>    | Castor zinc finger 1 [Source:HGNC Symbol;Acc:26002]                          |   |
| <b>CAT</b>      | Catalase [Source:HGNC Symbol;Acc:1516]                                       |   |
| <b>CATSPERB</b> | Cation channel, sperm-associated, beta [Source:HGNC Symbol;Acc:20500]        |   |
| <b>CATSPERG</b> | Cation channel, sperm-associated, gamma [Source:HGNC Symbol;Acc:25243]       |   |
| <b>CAV2</b>     | Caveolin 2 [Source:HGNC Symbol;Acc:1528]                                     |   |
| <b>CBLB</b>     | Cas-Br-M (murine) ecotropic retroviral transforming sequence b               | √ |
| <b>CBR3</b>     | Carbonyl reductase 3 [Source:HGNC Symbol;Acc:1549]                           |   |
| <b>CBWD3</b>    | COBW domain containing 3 [Source:HGNC Symbol;Acc:18519]                      |   |
| <b>CBWD5</b>    | COBW domain containing 5 [Source:HGNC Symbol;Acc:24584]                      |   |
| <b>CBWD6</b>    | COBW domain containing 6 [Source:HGNC Symbol;Acc:31978]                      |   |
| <b>CBX3</b>     | Chromobox homolog 3 [Source:HGNC Symbol;Acc:1553]                            |   |
| <b>CBX7</b>     | Chromobox homolog 7 [Source:HGNC Symbol;Acc:1557]                            |   |
| <b>CC2D1A</b>   | Coiled-coil and C2 domain containing 1A [Source:HGNC Symbol;Acc:30237]       |   |
| <b>CC2D1B</b>   | Coiled-coil and C2 domain containing 1B [Source:HGNC Symbol;Acc:29386]       |   |
| <b>CCAR1</b>    | Cell division cycle and apoptosis regulator 1 [Source:HGNC Symbol;Acc:24236] |   |
| <b>CCBL1</b>    | Cysteine conjugate-beta lyase, cytoplasmic [Source:HGNC Symbol;Acc:1564]     |   |
| <b>CCBL2</b>    | Cysteine conjugate-beta lyase 2 [Source:HGNC Symbol;Acc:33238]               |   |
| <b>CCDC103</b>  | Coiled-coil domain containing 103 [Source:HGNC Symbol;Acc:32700]             |   |
| <b>CCDC108</b>  | Coiled-coil domain containing 108 [Source:HGNC Symbol;Acc:25325]             |   |
| <b>CCDC11</b>   | Coiled-coil domain containing 11 [Source:HGNC Symbol;Acc:26530]              |   |
| <b>CCDC110</b>  | Coiled-coil domain containing 110 [Source:HGNC Symbol;Acc:28504]             |   |
| <b>CCDC112</b>  | Coiled-coil domain containing 112 [Source:HGNC Symbol;Acc:28599]             |   |
| <b>CCDC116</b>  | Coiled-coil domain containing 116 [Source:HGNC Symbol;Acc:26688]             |   |
| <b>CCDC126</b>  | Coiled-coil domain containing 126 [Source:HGNC Symbol;Acc:22398]             |   |
| <b>CCDC13</b>   | Coiled-coil domain containing 13 [Source:HGNC Symbol;Acc:26358]              |   |
| <b>CCDC130</b>  | Coiled-coil domain containing 130 [Source:HGNC Symbol;Acc:28118]             |   |
| <b>CCDC132</b>  | Coiled-coil domain containing 132 [Source:HGNC Symbol;Acc:25956]             |   |
| <b>CCDC135</b>  | Coiled-coil domain containing 135 [Source:HGNC Symbol;Acc:25289]             |   |

|                |                                                                  |  |
|----------------|------------------------------------------------------------------|--|
| <b>CCDC138</b> | Coiled-coil domain containing 138 [Source:HGNC Symbol;Acc:26531] |  |
| <b>CCDC14</b>  | Coiled-coil domain containing 14 [Source:HGNC Symbol;Acc:25766]  |  |
| <b>CCDC142</b> | Coiled-coil domain containing 142 [Source:HGNC Symbol;Acc:25889] |  |
| <b>CCDC155</b> | Coiled-coil domain containing 155 [Source:HGNC Symbol;Acc:26520] |  |
| <b>CCDC18</b>  | Coiled-coil domain containing 18 [Source:HGNC Symbol;Acc:30370]  |  |
| <b>CCDC21</b>  | Coiled-coil domain containing 21 [Source:HGNC Symbol;Acc:25309]  |  |
| <b>CCDC24</b>  | Coiled-coil domain containing 24 [Source:HGNC Symbol;Acc:28688]  |  |
| <b>CCDC25</b>  | Coiled-coil domain containing 25 [Source:HGNC Symbol;Acc:25591]  |  |
| <b>CCDC28A</b> | Coiled-coil domain containing 28A [Source:HGNC Symbol;Acc:21098] |  |
| <b>CCDC28B</b> | Coiled-coil domain containing 28B [Source:HGNC Symbol;Acc:28163] |  |
| <b>CCDC3</b>   | Coiled-coil domain containing 3 [Source:HGNC Symbol;Acc:23813]   |  |
| <b>CCDC36</b>  | Coiled-coil domain containing 36 [Source:HGNC Symbol;Acc:27945]  |  |
| <b>CCDC42</b>  | Coiled-coil domain containing 42 [Source:HGNC Symbol;Acc:26528]  |  |
| <b>CCDC45</b>  | Coiled-coil domain containing 45 [Source:HGNC Symbol;Acc:25141]  |  |
| <b>CCDC50</b>  | Coiled-coil domain containing 50 [Source:HGNC Symbol;Acc:18111]  |  |
| <b>CCDC55</b>  | Coiled-coil domain containing 55 [Source:HGNC Symbol;Acc:25305]  |  |
| <b>CCDC58</b>  | Coiled-coil domain containing 58 [Source:HGNC Symbol;Acc:31136]  |  |
| <b>CCDC60</b>  | Coiled-coil domain containing 60 [Source:HGNC Symbol;Acc:28610]  |  |
| <b>CCDC62</b>  | Coiled-coil domain containing 62 [Source:HGNC Symbol;Acc:30723]  |  |
| <b>CCDC63</b>  | Coiled-coil domain containing 63 [Source:HGNC Symbol;Acc:26669]  |  |
| <b>CCDC64</b>  | Coiled-coil domain containing 64 [Source:HGNC Symbol;Acc:28095]  |  |
| <b>CCDC66</b>  | Coiled-coil domain containing 66 [Source:HGNC Symbol;Acc:27709]  |  |
| <b>CCDC78</b>  | Coiled-coil domain containing 78 [Source:HGNC Symbol;Acc:14153]  |  |
| <b>CCDC80</b>  | Coiled-coil domain containing 80 [Source:HGNC Symbol;Acc:30649]  |  |
| <b>CCDC81</b>  | Coiled-coil domain containing 81 [Source:HGNC Symbol;Acc:26281]  |  |
| <b>CCDC88A</b> | Coiled-coil domain containing 88A [Source:HGNC Symbol;Acc:25523] |  |
| <b>CCDC88B</b> | Coiled-coil domain containing 88B [Source:HGNC Symbol;Acc:26757] |  |
| <b>CCDC88C</b> | Coiled-coil domain containing 88C [Source:HGNC Symbol;Acc:19967] |  |
| <b>CCDC9</b>   | Coiled-coil domain containing 9 [Source:HGNC Symbol;Acc:24560]   |  |
| <b>CCDC92</b>  | Coiled-coil domain containing 92 [Source:HGNC Symbol;Acc:29563]  |  |
| <b>CCDC94</b>  | Coiled-coil domain containing 94 [Source:HGNC Symbol;Acc:25518]  |  |
| <b>CCDC97</b>  | Coiled-coil domain containing 97 [Source:HGNC Symbol;Acc:28289]  |  |
| <b>CCDC99</b>  | Coiled-coil domain containing 99 [Source:HGNC Symbol;Acc:26010]  |  |



|                |                                                                                                     |   |
|----------------|-----------------------------------------------------------------------------------------------------|---|
| <b>CCHCR1</b>  | Coiled-coil alpha-helical rod protein 1 [Source:HGNC Symbol;Acc:13930]                              |   |
| <b>CCIN</b>    | Calicin [Source:HGNC Symbol;Acc:1568]                                                               |   |
| <b>CCKAR</b>   | Cholecystokinin A receptor [Source:HGNC Symbol;Acc:1570]                                            |   |
| <b>CCKBR</b>   | Cholecystokinin B receptor [Source:HGNC Symbol;Acc:1571]                                            |   |
| <b>CCL1</b>    | Chemokine (C-C motif) ligand 1 [Source:HGNC Symbol;Acc:10609]                                       |   |
| <b>CCL11</b>   | Chemokine (C-C motif) ligand 11 [Source:HGNC Symbol;Acc:10610]                                      |   |
| <b>CCL18</b>   | Chemokine (C-C motif) ligand 18 (pulmonary and activation-regulated) [Source:HGNC Symbol;Acc:10616] |   |
| <b>CCL19</b>   | Chemokine (C-C motif) ligand 19 [Source:HGNC Symbol;Acc:10617]                                      |   |
| <b>CCL22</b>   | Chemokine (C-C motif) ligand 22 [Source:HGNC Symbol;Acc:10621]                                      |   |
| <b>CCNB3</b>   | Cyclin B3 [Source:HGNC Symbol;Acc:18709]                                                            |   |
| <b>CCNC</b>    | Cyclin C [Source:HGNC Symbol;Acc:1581]                                                              |   |
| <b>CCND1</b>   | Cyclin D1                                                                                           | √ |
| <b>CCNE2</b>   | Cyclin E2 [Source:HGNC Symbol;Acc:1590]                                                             |   |
| <b>CCNG1</b>   | Cyclin G1 [Source:HGNC Symbol;Acc:1592]                                                             |   |
| <b>CCNI</b>    | Cyclin I [Source:HGNC Symbol;Acc:1595]                                                              |   |
| <b>CCNI2</b>   | Cyclin I family, member 2 [Source:HGNC Symbol;Acc:33869]                                            |   |
| <b>CCNK</b>    | Cyclin K [Source:HGNC Symbol;Acc:1596]                                                              |   |
| <b>CCNY</b>    | Cyclin Y [Source:HGNC Symbol;Acc:23354]                                                             |   |
| <b>CCNYL1</b>  | Cyclin Y-like 1 [Source:HGNC Symbol;Acc:26868]                                                      |   |
| <b>CCR4</b>    | Chemokine (C-C motif) receptor 4 [Source:HGNC Symbol;Acc:1605]                                      |   |
| <b>CCR7</b>    | Chemokine (C-C motif) receptor 7 [Source:HGNC Symbol;Acc:1608]                                      |   |
| <b>CCT5</b>    | Chaperonin containing TCP1, subunit 5 (epsilon) [Source:HGNC Symbol;Acc:1618]                       |   |
| <b>CCT6A</b>   | Chaperonin containing TCP1, subunit 6A (zeta 1) [Source:HGNC Symbol;Acc:1620]                       |   |
| <b>CCT8L2</b>  | Chaperonin containing TCP1, subunit 8 (theta)-like 2 [Source:HGNC Symbol;Acc:15553]                 |   |
| <b>CD101</b>   | CD101 molecule [Source:HGNC Symbol;Acc:5949]                                                        |   |
| <b>CD109</b>   | CD109 molecule [Source:HGNC Symbol;Acc:21685]                                                       |   |
| <b>CD163</b>   | CD163 molecule [Source:HGNC Symbol;Acc:1631]                                                        |   |
| <b>CD163L1</b> | CD163 molecule-like 1 [Source:HGNC Symbol;Acc:30375]                                                |   |
| <b>CD19</b>    | CD19 molecule [Source:HGNC Symbol;Acc:1633]                                                         |   |

|                |                                                                                 |   |
|----------------|---------------------------------------------------------------------------------|---|
| <b>CD1E</b>    | CD1e molecule [Source:HGNC Symbol;Acc:1638]                                     |   |
| <b>CD209</b>   | CD209 molecule [Source:HGNC Symbol;Acc:1641]                                    |   |
| <b>CD226</b>   | CD226 molecule [Source:HGNC Symbol;Acc:16961]                                   |   |
| <b>CD27</b>    | CD27 molecule [Source:HGNC Symbol;Acc:11922]                                    |   |
| <b>CD28</b>    | CD28 molecule [Source:HGNC Symbol;Acc:1653]                                     |   |
| <b>CD2BP2</b>  | CD2 (cytoplasmic tail) binding protein 2 [Source:HGNC Symbol;Acc:1656]          |   |
| <b>CD300A</b>  | CD300a molecule [Source:HGNC Symbol;Acc:19319]                                  |   |
| <b>CD300LB</b> | CD300 molecule-like family member b [Source:HGNC Symbol;Acc:30811]              |   |
| <b>CD320</b>   | CD320 molecule [Source:HGNC Symbol;Acc:16692]                                   |   |
| <b>CD34</b>    | CD34 molecule [Source:HGNC Symbol;Acc:1662]                                     |   |
| <b>CD3E</b>    | CD3e molecule, epsilon (CD3-TCR complex) [Source:HGNC Symbol;Acc:1674]          |   |
| <b>CD4</b>     | CD4 molecule [Source:HGNC Symbol;Acc:1678]                                      |   |
| <b>CD40</b>    | CD40 molecule, TNF receptor superfamily member 5 [Source:HGNC Symbol;Acc:11919] |   |
| <b>CD46</b>    | CD46 molecule, complement regulatory protein [Source:HGNC Symbol;Acc:6953]      |   |
| <b>CD59</b>    | CD59 molecule, complement regulatory protein [Source:HGNC Symbol;Acc:1689]      |   |
| <b>CD72</b>    | CD72 molecule [Source:HGNC Symbol;Acc:1696]                                     |   |
| <b>CD74</b>    | CD74 molecule, major histocompatibility complex, class II invariant chain       | √ |
| <b>CD83</b>    | CD83 molecule [Source:HGNC Symbol;Acc:1703]                                     |   |
| <b>CD86</b>    | CD86 molecule [Source:HGNC Symbol;Acc:1705]                                     |   |
| <b>CD96</b>    | CD96 molecule [Source:HGNC Symbol;Acc:16892]                                    |   |
| <b>CD99L2</b>  | CD99 molecule-like 2 [Source:HGNC Symbol;Acc:18237]                             |   |
| <b>CDC16</b>   | Cell division cycle 16 homolog (S. Cerevisiae) [Source:HGNC Symbol;Acc:1720]    |   |
| <b>CDC20</b>   | Cell division cycle 20 homolog (S. Cerevisiae) [Source:HGNC Symbol;Acc:1723]    |   |
| <b>CDC25A</b>  | Cell division cycle 25 homolog A (S. Pombe) [Source:HGNC Symbol;Acc:1725]       |   |
| <b>CDC27</b>   | Cell division cycle 27 homolog (S. Cerevisiae) [Source:HGNC Symbol;Acc:1728]    |   |

|                 |                                                                                      |   |
|-----------------|--------------------------------------------------------------------------------------|---|
| <b>CDC37L1</b>  | Cell division cycle 37 homolog (S. Cerevisiae)-like 1 [Source:HGNC Symbol;Acc:17179] |   |
| <b>CDC42</b>    | Cell division cycle 42 (GTP binding protein, 25kda) [Source:HGNC Symbol;Acc:1736]    |   |
| <b>CDC42BPA</b> | CDC42 binding protein kinase alpha (DMPK-like) [Source:HGNC Symbol;Acc:1737]         |   |
| <b>CDC42BPB</b> | CDC42 binding protein kinase beta (DMPK-like) [Source:HGNC Symbol;Acc:1738]          |   |
| <b>CDC42BPG</b> | CDC42 binding protein kinase gamma (DMPK-like) [Source:HGNC Symbol;Acc:29829]        |   |
| <b>CDC42EP1</b> | CDC42 effector protein (Rho gtpase binding) 1 [Source:HGNC Symbol;Acc:17014]         |   |
| <b>CDC42EP2</b> | CDC42 effector protein (Rho gtpase binding) 2 [Source:HGNC Symbol;Acc:16263]         |   |
| <b>CDC42EP3</b> | CDC42 effector protein (Rho gtpase binding) 3 [Source:HGNC Symbol;Acc:16943]         |   |
| <b>CDC42SE1</b> | CDC42 small effector 1 [Source:HGNC Symbol;Acc:17719]                                |   |
| <b>CDC42SE2</b> | CDC42 small effector 2 [Source:HGNC Symbol;Acc:18547]                                |   |
| <b>CDC5L</b>    | CDC5 cell division cycle 5-like (S. Pombe) [Source:HGNC Symbol;Acc:1743]             |   |
| <b>CDCA2</b>    | Cell division cycle associated 2 [Source:HGNC Symbol;Acc:14623]                      |   |
| <b>CDCA3</b>    | Cell division cycle associated 3 [Source:HGNC Symbol;Acc:14624]                      |   |
| <b>CDCA8</b>    | Cell division cycle associated 8 [Source:HGNC Symbol;Acc:14629]                      |   |
| <b>CDCP1</b>    | CUB domain containing protein 1 [Source:HGNC Symbol;Acc:24357]                       |   |
| <b>CDH1</b>     | Cadherin 1, type 1, E-cadherin (epithelial)                                          | √ |
| <b>CDH12</b>    | Cadherin 12, type 2 (N-cadherin 2) [Source:HGNC Symbol;Acc:1751]                     |   |
| <b>CDH15</b>    | Cadherin 15, type 1, M-cadherin (myotubule) [Source:HGNC Symbol;Acc:1754]            |   |
| <b>CDH2</b>     | Cadherin 2, type 1, N-cadherin (neuronal) [Source:HGNC Symbol;Acc:1759]              |   |
| <b>CDH20</b>    | Cadherin 20, type 2 [Source:HGNC Symbol;Acc:1760]                                    |   |
| <b>CDH23</b>    | Cadherin-related 23 [Source:HGNC Symbol;Acc:13733]                                   |   |
| <b>CDH26</b>    | Cadherin 26 [Source:HGNC Symbol;Acc:15902]                                           |   |

|                 |                                                                                         |   |
|-----------------|-----------------------------------------------------------------------------------------|---|
| <b>CDH3</b>     | Cadherin 3, type 1, P-cadherin (placental) [Source:HGNC Symbol;Acc:1762]                |   |
| <b>CDH4</b>     | Cadherin 4, type 1, R-cadherin (retinal) [Source:HGNC Symbol;Acc:1763]                  |   |
| <b>CDH5</b>     | Cadherin 5, type 2 (vascular endothelium) [Source:HGNC Symbol;Acc:1764]                 |   |
| <b>CDH6</b>     | Cadherin 6, type 2, K-cadherin (fetal kidney) [Source:HGNC Symbol;Acc:1765]             |   |
| <b>CDH7</b>     | Cadherin 7, type 2 [Source:HGNC Symbol;Acc:1766]                                        |   |
| <b>CDH9</b>     | Cadherin 9, type 2 (T1-cadherin) [Source:HGNC Symbol;Acc:1768]                          |   |
| <b>CDHR1</b>    | Cadherin-related family member 1 [Source:HGNC Symbol;Acc:14550]                         |   |
| <b>CDK11A</b>   | Cyclin-dependent kinase 11A [Source:HGNC Symbol;Acc:1730]                               |   |
| <b>CDK14</b>    | Cyclin-dependent kinase 14 [Source:HGNC Symbol;Acc:8883]                                |   |
| <b>CDK17</b>    | Cyclin-dependent kinase 17 [Source:HGNC Symbol;Acc:8750]                                |   |
| <b>CDK18</b>    | Cyclin-dependent kinase 18 [Source:HGNC Symbol;Acc:8751]                                |   |
| <b>CDK19</b>    | Cyclin-dependent kinase 19 [Source:HGNC Symbol;Acc:19338]                               |   |
| <b>CDK20</b>    | Cyclin-dependent kinase 20 [Source:HGNC Symbol;Acc:21420]                               |   |
| <b>CDK4</b>     | Cyclin-dependent kinase 4                                                               | √ |
| <b>CDK5RAP1</b> | CDK5 regulatory subunit associated protein 1 [Source:HGNC Symbol;Acc:15880]             |   |
| <b>CDK5RAP2</b> | CDK5 regulatory subunit associated protein 2 [Source:HGNC Symbol;Acc:18672]             |   |
| <b>CDKL1</b>    | Cyclin-dependent kinase-like 1 (CDC2-related kinase) [Source:HGNC Symbol;Acc:1781]      |   |
| <b>CDKN1B</b>   | Cyclin-dependent kinase inhibitor 1B (p27, Kip1) [Source:HGNC Symbol;Acc:1785]          |   |
| <b>CDKN2AIP</b> | CDKN2A interacting protein [Source:HGNC Symbol;Acc:24325]                               |   |
| <b>CDKN2B</b>   | Cyclin-dependent kinase inhibitor 2B (p15, inhibits CDK4) [Source:HGNC Symbol;Acc:1788] |   |
| <b>CDKN2D</b>   | Cyclin-dependent kinase inhibitor 2D (p19, inhibits CDK4) [Source:HGNC Symbol;Acc:1790] |   |
| <b>CDON</b>     | Cdon homolog (mouse) [Source:HGNC Symbol;Acc:17104]                                     |   |
| <b>CDR2L</b>    | Cerebellar degeneration-related protein 2-like [Source:HGNC Symbol;Acc:29999]           |   |

|                 |                                                                                                             |  |
|-----------------|-------------------------------------------------------------------------------------------------------------|--|
| <b>CDS2</b>     | CDP-diacylglycerol synthase (phosphatidate cytidyltransferase) 2 [Source:HGNC Symbol;Acc:1801]              |  |
| <b>CEACAM21</b> | Carcinoembryonic antigen-related cell adhesion molecule 21 [Source:HGNC Symbol;Acc:28834]                   |  |
| <b>CEBPD</b>    | CCAAT/enhancer binding protein (C/EBP), delta [Source:HGNC Symbol;Acc:1835]                                 |  |
| <b>CEBPG</b>    | CCAAT/enhancer binding protein (C/EBP), gamma [Source:HGNC Symbol;Acc:1837]                                 |  |
| <b>CEBPZ</b>    | CCAAT/enhancer binding protein (C/EBP), zeta [Source:HGNC Symbol;Acc:24218]                                 |  |
| <b>CECR6</b>    | Cat eye syndrome chromosome region, candidate 6 [Source:HGNC Symbol;Acc:1844]                               |  |
| <b>CELA1</b>    | Chymotrypsin-like elastase family, member 1 [Source:HGNC Symbol;Acc:3308]                                   |  |
| <b>CELA3A</b>   | Chymotrypsin-like elastase family, member 3A [Source:HGNC Symbol;Acc:15944]                                 |  |
| <b>CELF1</b>    | CUGBP, Elav-like family member 1 [Source:HGNC Symbol;Acc:2549]                                              |  |
| <b>CELF2</b>    | CUGBP, Elav-like family member 2 [Source:HGNC Symbol;Acc:2550]                                              |  |
| <b>CELF5</b>    | CUGBP, Elav-like family member 5 [Source:HGNC Symbol;Acc:14058]                                             |  |
| <b>CELSR1</b>   | Cadherin, EGF LAG seven-pass G-type receptor 1 (flamingo homolog, Drosophila) [Source:HGNC Symbol;Acc:1850] |  |
| <b>CELSR2</b>   | Cadherin, EGF LAG seven-pass G-type receptor 2 (flamingo homolog, Drosophila) [Source:HGNC Symbol;Acc:3231] |  |
| <b>CELSR3</b>   | Cadherin, EGF LAG seven-pass G-type receptor 3 (flamingo homolog, Drosophila) [Source:HGNC Symbol;Acc:3230] |  |
| <b>CEND1</b>    | Cell cycle exit and neuronal differentiation 1 [Source:HGNC Symbol;Acc:24153]                               |  |
| <b>CENPC1</b>   | Centromere protein C 1 [Source:HGNC Symbol;Acc:1854]                                                        |  |
| <b>CENPK</b>    | Centromere protein K [Source:HGNC Symbol;Acc:29479]                                                         |  |
| <b>CENPO</b>    | Centromere protein O [Source:HGNC Symbol;Acc:28152]                                                         |  |
| <b>CENPP</b>    | Centromere protein P [Source:HGNC Symbol;Acc:32933]                                                         |  |
| <b>CEP110</b>   | Centrosomal protein 110kda [Source:HGNC Symbol;Acc:1858]                                                    |  |
| <b>CEP135</b>   | Centrosomal protein 135kda [Source:HGNC Symbol;Acc:29086]                                                   |  |

|               |                                                                                        |   |
|---------------|----------------------------------------------------------------------------------------|---|
| <b>CEP152</b> | Centrosomal protein 152kda [Source:HGNC Symbol;Acc:29298]                              |   |
| <b>CEP164</b> | Centrosomal protein 164kda [Source:HGNC Symbol;Acc:29182]                              |   |
| <b>CEP170</b> | Centrosomal protein 170kda [Source:HGNC Symbol;Acc:28920]                              |   |
| <b>CEP250</b> | Centrosomal protein 250kda [Source:HGNC Symbol;Acc:1859]                               |   |
| <b>CEP350</b> | Centrosomal protein 350kda [Source:HGNC Symbol;Acc:24238]                              |   |
| <b>CEP63</b>  | Centrosomal protein 63kda [Source:HGNC Symbol;Acc:25815]                               |   |
| <b>CEP68</b>  | Centrosomal protein 68kda [Source:HGNC Symbol;Acc:29076]                               |   |
| <b>CEP72</b>  | Centrosomal protein 72kda [Source:HGNC Symbol;Acc:25547]                               |   |
| <b>CEP78</b>  | Centrosomal protein 78kda [Source:HGNC Symbol;Acc:25740]                               |   |
| <b>CEP97</b>  | Centrosomal protein 97kda [Source:HGNC Symbol;Acc:26244]                               |   |
| <b>CES1</b>   | Carboxylesterase 1 [Source:HGNC Symbol;Acc:1863]                                       |   |
| <b>CES2</b>   | Carboxylesterase 2 [Source:HGNC Symbol;Acc:1864]                                       |   |
| <b>CES3</b>   | Carboxylesterase 3 [Source:HGNC Symbol;Acc:1865]                                       |   |
| <b>CES5A</b>  | Carboxylesterase 5A [Source:HGNC Symbol;Acc:26459]                                     |   |
| <b>CFC1</b>   | Cripto, FRL-1, cryptic family 1 [Source:HGNC Symbol;Acc:18292]                         |   |
| <b>CFC1B</b>  | Cripto, FRL-1, cryptic family 1B [Source:HGNC Symbol;Acc:33983]                        |   |
| <b>CFHR5</b>  | Complement factor H-related 5 [Source:HGNC Symbol;Acc:24668]                           |   |
| <b>CFI</b>    | Complement factor I [Source:HGNC Symbol;Acc:5394]                                      |   |
| <b>CFL1</b>   | Cofilin 1 (non-muscle) [Source:HGNC Symbol;Acc:1874]                                   |   |
| <b>CFP</b>    | Complement factor properdin [Source:HGNC Symbol;Acc:8864]                              |   |
| <b>CGGBP1</b> | CGG triplet repeat binding protein 1 [Source:HGNC Symbol;Acc:1888]                     |   |
| <b>CGNL1</b>  | Cingulin-like 1 [Source:HGNC Symbol;Acc:25931]                                         |   |
| <b>CGREF1</b> | Cell growth regulator with EF-hand domain 1 [Source:HGNC Symbol;Acc:16962]             |   |
| <b>CGRRF1</b> | Cell growth regulator with ring finger domain 1 [Source:HGNC Symbol;Acc:15528]         |   |
| <b>CHCHD5</b> | Coiled-coil-helix-coiled-coil-helix domain containing 5 [Source:HGNC Symbol;Acc:17840] |   |
| <b>CHCHD7</b> | Coiled-coil-helix-coiled-coil-helix domain containing 7 [Source:HGNC Symbol;Acc:28314] | √ |
| <b>CHCHD8</b> | Coiled-coil-helix-coiled-coil-helix domain containing 8 [Source:HGNC Symbol;Acc:24604] |   |

|               |                                                                                                   |   |
|---------------|---------------------------------------------------------------------------------------------------|---|
| <b>CHD1</b>   | Chromodomain helicase DNA binding protein 1 [Source:HGNC Symbol;Acc:1915]                         |   |
| <b>CHD1L</b>  | Chromodomain helicase DNA binding protein 1-like [Source:HGNC Symbol;Acc:1916]                    |   |
| <b>CHD2</b>   | Chromodomain helicase DNA binding protein 2 [Source:HGNC Symbol;Acc:1917]                         |   |
| <b>CHD3</b>   | Chromodomain helicase DNA binding protein 3 [Source:HGNC Symbol;Acc:1918]                         |   |
| <b>CHD4</b>   | Chromodomain helicase DNA binding protein 4 [Source:HGNC Symbol;Acc:1919]                         |   |
| <b>CHD6</b>   | Chromodomain helicase DNA binding protein 6 [Source:HGNC Symbol;Acc:19057]                        |   |
| <b>CHD7</b>   | Chromodomain helicase DNA binding protein 7 [Source:HGNC Symbol;Acc:20626]                        |   |
| <b>CHD9</b>   | Chromodomain helicase DNA binding protein 9 [Source:HGNC Symbol;Acc:25701]                        |   |
| <b>CHEK2</b>  | CHK2 checkpoint homolog ( <i>S. Pombe</i> )                                                       | √ |
| <b>CHERP</b>  | Calcium homeostasis endoplasmic reticulum protein [Source:HGNC Symbol;Acc:16930]                  |   |
| <b>CHFR</b>   | Checkpoint with forkhead and ring finger domains [Source:HGNC Symbol;Acc:20455]                   |   |
| <b>CHGA</b>   | Chromogranin A (parathyroid secretory protein 1) [Source:HGNC Symbol;Acc:1929]                    |   |
| <b>CHI3L2</b> | Chitinase 3-like 2 [Source:HGNC Symbol;Acc:1933]                                                  |   |
| <b>CHID1</b>  | Chitinase domain containing 1 [Source:HGNC Symbol;Acc:28474]                                      |   |
| <b>CHIT1</b>  | Chitinase 1 (chitotriosidase) [Source:HGNC Symbol;Acc:1936]                                       |   |
| <b>CHL1</b>   | Cell adhesion molecule with homology to L1CAM (close homolog of L1) [Source:HGNC Symbol;Acc:1939] |   |
| <b>CHML</b>   | Choroideremia-like (Rab escort protein 2) [Source:HGNC Symbol;Acc:1941]                           |   |
| <b>CHMP1A</b> | Chromatin modifying protein 1A [Source:HGNC Symbol;Acc:8740]                                      |   |
| <b>CHMP2B</b> | Chromatin modifying protein 2B [Source:HGNC Symbol;Acc:24537]                                     |   |
| <b>CHMP7</b>  | CHMP family, member 7 [Source:HGNC Symbol;Acc:28439]                                              |   |

|                |                                                                                             |   |
|----------------|---------------------------------------------------------------------------------------------|---|
| <b>CHN1</b>    | Chimerin (chimaerin) 1                                                                      | √ |
| <b>CHPF</b>    | Chondroitin polymerizing factor [Source:HGNC Symbol;Acc:24291]                              |   |
| <b>CHPF2</b>   | Chondroitin polymerizing factor 2 [Source:HGNC Symbol;Acc:29270]                            |   |
| <b>CHRDL1</b>  | Chordin-like 1 [Source:HGNC Symbol;Acc:29861]                                               |   |
| <b>CHRM1</b>   | Cholinergic receptor, muscarinic 1 [Source:HGNC Symbol;Acc:1950]                            |   |
| <b>CHRM2</b>   | Cholinergic receptor, muscarinic 2 [Source:HGNC Symbol;Acc:1951]                            |   |
| <b>CHRM3</b>   | Cholinergic receptor, muscarinic 3 [Source:HGNC Symbol;Acc:1952]                            |   |
| <b>CHRNA10</b> | Cholinergic receptor, nicotinic, alpha 10 [Source:HGNC Symbol;Acc:13800]                    |   |
| <b>CHRNA2</b>  | Cholinergic receptor, nicotinic, alpha 2 (neuronal) [Source:HGNC Symbol;Acc:1956]           |   |
| <b>CHRNA7</b>  | Cholinergic receptor, nicotinic, alpha 7 [Source:HGNC Symbol;Acc:1960]                      |   |
| <b>CHRNB2</b>  | Cholinergic receptor, nicotinic, beta 2 (neuronal) [Source:HGNC Symbol;Acc:1962]            |   |
| <b>CHRNB3</b>  | Cholinergic receptor, nicotinic, beta 3 [Source:HGNC Symbol;Acc:1963]                       |   |
| <b>CHRNB4</b>  | Cholinergic receptor, nicotinic, beta 4 [Source:HGNC Symbol;Acc:1964]                       |   |
| <b>CHRND</b>   | Cholinergic receptor, nicotinic, delta [Source:HGNC Symbol;Acc:1965]                        |   |
| <b>CHST11</b>  | Carbohydrate (chondroitin 4) sulfotransferase 11 [Source:HGNC Symbol;Acc:17422]             |   |
| <b>CHST14</b>  | Carbohydrate (N-acetylgalactosamine 4-O) sulfotransferase 14 [Source:HGNC Symbol;Acc:24464] |   |
| <b>CHST3</b>   | Carbohydrate (chondroitin 6) sulfotransferase 3 [Source:HGNC Symbol;Acc:1971]               |   |
| <b>CHST5</b>   | Carbohydrate (N-acetylglucosamine 6-O) sulfotransferase 5 [Source:HGNC Symbol;Acc:1973]     |   |
| <b>CHST6</b>   | Carbohydrate (N-acetylglucosamine 6-O) sulfotransferase 6 [Source:HGNC Symbol;Acc:6938]     |   |
| <b>CHSY3</b>   | Chondroitin sulfate synthase 3 [Source:HGNC Symbol;Acc:24293]                               |   |
| <b>CIDEB</b>   | Cell death-inducing DFFA-like effector b [Source:HGNC Symbol;Acc:1977]                      |   |
| <b>CIITA</b>   | Class II, major histocompatibility complex, transactivator                                  | √ |
| <b>CILP2</b>   | Cartilage intermediate layer protein 2 [Source:HGNC Symbol;Acc:24213]                       |   |
| <b>CIRBP</b>   | Cold inducible RNA binding protein [Source:HGNC Symbol;Acc:1982]                            |   |



|                |                                                                                    |  |
|----------------|------------------------------------------------------------------------------------|--|
| <b>CISD1</b>   | CDGSH iron sulfur domain 1 [Source:HGNC Symbol;Acc:30880]                          |  |
| <b>CIT</b>     | Citron (rho-interacting, serine/threonine kinase 21) [Source:HGNC Symbol;Acc:1985] |  |
| <b>CKAP2L</b>  | Cytoskeleton associated protein 2-like [Source:HGNC Symbol;Acc:26877]              |  |
| <b>CKAP4</b>   | Cytoskeleton-associated protein 4 [Source:HGNC Symbol;Acc:16991]                   |  |
| <b>CKAP5</b>   | Cytoskeleton associated protein 5 [Source:HGNC Symbol;Acc:28959]                   |  |
| <b>CKS1B</b>   | CDC28 protein kinase regulatory subunit 1B [Source:HGNC Symbol;Acc:19083]          |  |
| <b>CLASP1</b>  | Cytoplasmic linker associated protein 1 [Source:HGNC Symbol;Acc:17088]             |  |
| <b>CLASP2</b>  | Cytoplasmic linker associated protein 2 [Source:HGNC Symbol;Acc:17078]             |  |
| <b>CLCA2</b>   | Chloride channel accessory 2 [Source:HGNC Symbol;Acc:2016]                         |  |
| <b>CLCF1</b>   | Cardiotrophin-like cytokine factor 1 [Source:HGNC Symbol;Acc:17412]                |  |
| <b>CLCN2</b>   | Chloride channel 2 [Source:HGNC Symbol;Acc:2020]                                   |  |
| <b>CLCN3</b>   | Chloride channel 3 [Source:HGNC Symbol;Acc:2021]                                   |  |
| <b>CLCN4</b>   | Chloride channel 4 [Source:HGNC Symbol;Acc:2022]                                   |  |
| <b>CLCN5</b>   | Chloride channel 5 [Source:HGNC Symbol;Acc:2023]                                   |  |
| <b>CLCN6</b>   | Chloride channel 6 [Source:HGNC Symbol;Acc:2024]                                   |  |
| <b>CLCN7</b>   | Chloride channel 7 [Source:HGNC Symbol;Acc:2025]                                   |  |
| <b>CLCNKA</b>  | Chloride channel Ka [Source:HGNC Symbol;Acc:2026]                                  |  |
| <b>CLCNKB</b>  | Chloride channel Kb [Source:HGNC Symbol;Acc:2027]                                  |  |
| <b>CLDN10</b>  | Claudin 10 [Source:HGNC Symbol;Acc:2033]                                           |  |
| <b>CLDN16</b>  | Claudin 16 [Source:HGNC Symbol;Acc:2037]                                           |  |
| <b>CLDN20</b>  | Claudin 20 [Source:HGNC Symbol;Acc:2042]                                           |  |
| <b>CLDN8</b>   | Claudin 8 [Source:HGNC Symbol;Acc:2050]                                            |  |
| <b>CLDN9</b>   | Claudin 9 [Source:HGNC Symbol;Acc:2051]                                            |  |
| <b>CLEC17A</b> | C-type lectin domain family 17, member A [Source:HGNC Symbol;Acc:34520]            |  |
| <b>CLEC18A</b> | C-type lectin domain family 18, member A [Source:HGNC Symbol;Acc:30388]            |  |
| <b>CLEC18B</b> | C-type lectin domain family 18, member B [Source:HGNC Symbol;Acc:33849]            |  |
| <b>CLEC18C</b> | C-type lectin domain family 18, member C [Source:HGNC Symbol;Acc:28538]            |  |

|                |                                                                                                                 |   |
|----------------|-----------------------------------------------------------------------------------------------------------------|---|
| <b>CLEC4A</b>  | C-type lectin domain family 4, member A [Source:HGNC Symbol;Acc:13257]                                          |   |
| <b>CLEC6A</b>  | C-type lectin domain family 6, member A [Source:HGNC Symbol;Acc:14556]                                          |   |
| <b>CLIC3</b>   | Chloride intracellular channel 3 [Source:HGNC Symbol;Acc:2064]                                                  |   |
| <b>CLINT1</b>  | Clathrin interactor 1 [Source:HGNC Symbol;Acc:23186]                                                            |   |
| <b>CLIP1</b>   | CAP-GLY domain containing linker protein 1 [Source:HGNC Symbol;Acc:10461]                                       |   |
| <b>CLIP2</b>   | CAP-GLY domain containing linker protein 2 [Source:HGNC Symbol;Acc:2586]                                        |   |
| <b>CLIP4</b>   | CAP-GLY domain containing linker protein family, member 4 [Source:HGNC Symbol;Acc:26108]                        |   |
| <b>CLK1</b>    | CDC-like kinase 1 [Source:HGNC Symbol;Acc:2068]                                                                 |   |
| <b>CLMN</b>    | Calmin (calponin-like, transmembrane) [Source:HGNC Symbol;Acc:19972]                                            |   |
| <b>CLN6</b>    | Ceroid-lipofuscinosis, neuronal 6, late infantile, variant [Source:HGNC Symbol;Acc:2077]                        |   |
| <b>CLN8</b>    | Ceroid-lipofuscinosis, neuronal 8 (epilepsy, progressive with mental retardation) [Source:HGNC Symbol;Acc:2079] |   |
| <b>CLNK</b>    | Cytokine-dependent hematopoietic cell linker [Source:HGNC Symbol;Acc:17438]                                     |   |
| <b>CLOCK</b>   | Clock homolog (mouse) [Source:HGNC Symbol;Acc:2082]                                                             |   |
| <b>CLP1</b>    | CLP1, cleavage and polyadenylation factor I subunit, homolog (S. Cerevisiae) [Source:HGNC Symbol;Acc:16999]     |   |
| <b>CLPTM1L</b> | CLPTM1-like [Source:HGNC Symbol;Acc:24308]                                                                      |   |
| <b>CLSPN</b>   | Claspin [Source:HGNC Symbol;Acc:19715]                                                                          |   |
| <b>CLTC</b>    | Clathrin, heavy chain (Hc)                                                                                      | √ |
| <b>CLVS1</b>   | Clavesin 1 [Source:HGNC Symbol;Acc:23139]                                                                       |   |
| <b>CLYBL</b>   | Citrate lyase beta like [Source:HGNC Symbol;Acc:18355]                                                          |   |
| <b>CMTM5</b>   | CKLF-like MARVEL transmembrane domain containing 5 [Source:HGNC Symbol;Acc:19176]                               |   |
| <b>CMYA5</b>   | Cardiomyopathy associated 5 [Source:HGNC Symbol;Acc:14305]                                                      |   |
| <b>CNDP1</b>   | Carnosine dipeptidase 1 (metallopeptidase M20 family) [Source:HGNC Symbol;Acc:20675]                            |   |

|                |                                                                                 |  |
|----------------|---------------------------------------------------------------------------------|--|
| <b>CNGB1</b>   | Cyclic nucleotide gated channel beta 1 [Source:HGNC Symbol;Acc:2151]            |  |
| <b>CNGB3</b>   | Cyclic nucleotide gated channel beta 3 [Source:HGNC Symbol;Acc:2153]            |  |
| <b>CNIH3</b>   | Cornichon homolog 3 (Drosophila) [Source:HGNC Symbol;Acc:26802]                 |  |
| <b>CNKSR2</b>  | Connector enhancer of kinase suppressor of Ras 2 [Source:HGNC Symbol;Acc:19701] |  |
| <b>CNN3</b>    | Calponin 3, acidic [Source:HGNC Symbol;Acc:2157]                                |  |
| <b>CNNM1</b>   | Cyclin M1 [Source:HGNC Symbol;Acc:102]                                          |  |
| <b>CNNM2</b>   | Cyclin M2 [Source:HGNC Symbol;Acc:103]                                          |  |
| <b>CNO</b>     | Cappuccino homolog (mouse) [Source:HGNC Symbol;Acc:24206]                       |  |
| <b>CNOT1</b>   | CCR4-NOT transcription complex, subunit 1 [Source:HGNC Symbol;Acc:7877]         |  |
| <b>CNOT10</b>  | CCR4-NOT transcription complex, subunit 10 [Source:HGNC Symbol;Acc:23817]       |  |
| <b>CNOT6L</b>  | CCR4-NOT transcription complex, subunit 6-like [Source:HGNC Symbol;Acc:18042]   |  |
| <b>CNOT7</b>   | CCR4-NOT transcription complex, subunit 7 [Source:HGNC Symbol;Acc:14101]        |  |
| <b>CNP</b>     | 2',3'-cyclic nucleotide 3' phosphodiesterase [Source:HGNC Symbol;Acc:2158]      |  |
| <b>CNR1</b>    | Cannabinoid receptor 1 (brain) [Source:HGNC Symbol;Acc:2159]                    |  |
| <b>CNR2</b>    | Cannabinoid receptor 2 (macrophage) [Source:HGNC Symbol;Acc:2160]               |  |
| <b>CNRIP1</b>  | Cannabinoid receptor interacting protein 1 [Source:HGNC Symbol;Acc:24546]       |  |
| <b>CNST</b>    | Consortin, connexin sorting protein [Source:HGNC Symbol;Acc:26486]              |  |
| <b>CNTN2</b>   | Contactin 2 (axonal) [Source:HGNC Symbol;Acc:2172]                              |  |
| <b>CNTN3</b>   | Contactin 3 (plasmacytoma associated) [Source:HGNC Symbol;Acc:2173]             |  |
| <b>CNTN6</b>   | Contactin 6 [Source:HGNC Symbol;Acc:2176]                                       |  |
| <b>CNTNAP1</b> | Contactin associated protein 1 [Source:HGNC Symbol;Acc:8011]                    |  |
| <b>CNTNAP2</b> | Contactin associated protein-like 2 [Source:HGNC Symbol;Acc:13830]              |  |
| <b>CNTNAP4</b> | Contactin associated protein-like 4 [Source:HGNC Symbol;Acc:18747]              |  |
| <b>CNTNAP5</b> | Contactin associated protein-like 5 [Source:HGNC Symbol;Acc:18748]              |  |
| <b>CNTROB</b>  | Centrobin, centrosomal BRCA2 interacting protein [Source:HGNC Symbol;Acc:29616] |  |

|                |                                                                                                                           |   |
|----------------|---------------------------------------------------------------------------------------------------------------------------|---|
| <b>COASY</b>   | Coa synthase [Source:HGNC Symbol;Acc:29932]                                                                               |   |
| <b>COBL</b>    | Cordon-bleu homolog (mouse) [Source:HGNC Symbol;Acc:22199]                                                                |   |
| <b>COBLL1</b>  | COBL-like 1 [Source:HGNC Symbol;Acc:23571]                                                                                |   |
| <b>COG5</b>    | Component of oligomeric golgi complex 5 [Source:HGNC Symbol;Acc:14857]                                                    |   |
| <b>COG8</b>    | Component of oligomeric golgi complex 8 [Source:HGNC Symbol;Acc:18623]                                                    |   |
| <b>COL12A1</b> | Collagen, type XII, alpha 1 [Source:HGNC Symbol;Acc:2188]                                                                 |   |
| <b>COL14A1</b> | Collagen, type XIV, alpha 1 [Source:HGNC Symbol;Acc:2191]                                                                 |   |
| <b>COL16A1</b> | Collagen, type XVI, alpha 1 [Source:HGNC Symbol;Acc:2193]                                                                 |   |
| <b>COL17A1</b> | Collagen, type XVII, alpha 1 [Source:HGNC Symbol;Acc:2194]                                                                |   |
| <b>COL19A1</b> | Collagen, type XIX, alpha 1 [Source:HGNC Symbol;Acc:2196]                                                                 |   |
| <b>COL1A1</b>  | Collagen, type I, alpha 1                                                                                                 | √ |
| <b>COL20A1</b> | Collagen, type XX, alpha 1 [Source:HGNC Symbol;Acc:14670]                                                                 |   |
| <b>COL22A1</b> | Collagen, type XXII, alpha 1 [Source:HGNC Symbol;Acc:22989]                                                               |   |
| <b>COL23A1</b> | Collagen, type XXIII, alpha 1 [Source:HGNC Symbol;Acc:22990]                                                              |   |
| <b>COL27A1</b> | Collagen, type XXVII, alpha 1 [Source:HGNC Symbol;Acc:22986]                                                              |   |
| <b>COL28A1</b> | Collagen, type XXVIII, alpha 1 [Source:HGNC Symbol;Acc:22442]                                                             |   |
| <b>COL3A1</b>  | Collagen, type III, alpha 1 [Source:HGNC Symbol;Acc:2201]                                                                 |   |
| <b>COL4A4</b>  | Collagen, type IV, alpha 4 [Source:HGNC Symbol;Acc:2206]                                                                  |   |
| <b>COL5A1</b>  | Collagen, type V, alpha 1 [Source:HGNC Symbol;Acc:2209]                                                                   |   |
| <b>COL5A2</b>  | Collagen, type V, alpha 2 [Source:HGNC Symbol;Acc:2210]                                                                   |   |
| <b>COL6A2</b>  | Collagen, type VI, alpha 2 [Source:HGNC Symbol;Acc:2212]                                                                  |   |
| <b>COL6A3</b>  | Collagen, type VI, alpha 3 [Source:HGNC Symbol;Acc:2213]                                                                  |   |
| <b>COL6A5</b>  | Collagen, type VI, alpha 5 [Source:HGNC Symbol;Acc:26674]                                                                 |   |
| <b>COL6A6</b>  | Collagen, type VI, alpha 6 [Source:HGNC Symbol;Acc:27023]                                                                 |   |
| <b>COL7A1</b>  | Collagen, type VII, alpha 1 [Source:HGNC Symbol;Acc:2214]                                                                 |   |
| <b>COL9A2</b>  | Collagen, type IX, alpha 2 [Source:HGNC Symbol;Acc:2218]                                                                  |   |
| <b>COL9A3</b>  | Collagen, type IX, alpha 3 [Source:HGNC Symbol;Acc:2219]                                                                  |   |
| <b>COLEC12</b> | Collectin sub-family member 12 [Source:HGNC Symbol;Acc:16016]                                                             |   |
| <b>COLQ</b>    | Collagen-like tail subunit (single strand of homotrimer) of asymmetric acetylcholinesterase [Source:HGNC Symbol;Acc:2226] |   |
| <b>COMM3</b>   | COMM domain containing 3 [Source:HGNC Symbol;Acc:23332]                                                                   |   |

|               |                                                                                                     |  |
|---------------|-----------------------------------------------------------------------------------------------------|--|
| <b>COMMD7</b> | COMM domain containing 7 [Source:HGNC Symbol;Acc:16223]                                             |  |
| <b>COMP</b>   | Cartilage oligomeric matrix protein [Source:HGNC Symbol;Acc:2227]                                   |  |
| <b>COMT</b>   | Catechol-O-methyltransferase [Source:HGNC Symbol;Acc:2228]                                          |  |
| <b>COPB2</b>  | Coatomer protein complex, subunit beta 2 (beta prime) [Source:HGNC Symbol;Acc:2232]                 |  |
| <b>COPS2</b>  | COP9 constitutive photomorphogenic homolog subunit 2 (Arabidopsis) [Source:HGNC Symbol;Acc:30747]   |  |
| <b>COPS4</b>  | COP9 constitutive photomorphogenic homolog subunit 4 (Arabidopsis) [Source:HGNC Symbol;Acc:16702]   |  |
| <b>COPS6</b>  | COP9 constitutive photomorphogenic homolog subunit 6 (Arabidopsis) [Source:HGNC Symbol;Acc:21749]   |  |
| <b>COPS7A</b> | COP9 constitutive photomorphogenic homolog subunit 7A (Arabidopsis) [Source:HGNC Symbol;Acc:16758]  |  |
| <b>COPS7B</b> | COP9 constitutive photomorphogenic homolog subunit 7B (Arabidopsis) [Source:HGNC Symbol;Acc:16760]  |  |
| <b>COPS8</b>  | COP9 constitutive photomorphogenic homolog subunit 8 (Arabidopsis) [Source:HGNC Symbol;Acc:24335]   |  |
| <b>COPZ1</b>  | Coatomer protein complex, subunit zeta 1 [Source:HGNC Symbol;Acc:2243]                              |  |
| <b>COQ4</b>   | Coenzyme Q4 homolog ( <i>S. Cerevisiae</i> ) [Source:HGNC Symbol;Acc:19693]                         |  |
| <b>COQ9</b>   | Coenzyme Q9 homolog ( <i>S. Cerevisiae</i> ) [Source:HGNC Symbol;Acc:25302]                         |  |
| <b>CORIN</b>  | Corin, serine peptidase [Source:HGNC Symbol;Acc:19012]                                              |  |
| <b>CORO1B</b> | Coronin, actin binding protein, 1B [Source:HGNC Symbol;Acc:2253]                                    |  |
| <b>CORO1C</b> | Coronin, actin binding protein, 1C [Source:HGNC Symbol;Acc:2254]                                    |  |
| <b>CORO2A</b> | Coronin, actin binding protein, 2A [Source:HGNC Symbol;Acc:2255]                                    |  |
| <b>CORO2B</b> | Coronin, actin binding protein, 2B [Source:HGNC Symbol;Acc:2256]                                    |  |
| <b>CORO7</b>  | Coronin 7 [Source:HGNC Symbol;Acc:26161]                                                            |  |
| <b>COX15</b>  | COX15 homolog, cytochrome c oxidase assembly protein (yeast) [Source:HGNC Symbol;Acc:2263]          |  |
| <b>COX18</b>  | COX18 cytochrome c oxidase assembly homolog ( <i>S. Cerevisiae</i> ) [Source:HGNC Symbol;Acc:26801] |  |
| <b>COX19</b>  | COX19 cytochrome c oxidase assembly homolog ( <i>S. Cerevisiae</i> ) [Source:HGNC Symbol;Acc:28074] |  |

|               |                                                                                           |  |
|---------------|-------------------------------------------------------------------------------------------|--|
| <b>COX4I1</b> | Cytochrome c oxidase subunit IV isoform 1 [Source:HGNC Symbol;Acc:2265]                   |  |
| <b>COX6B2</b> | Cytochrome c oxidase subunit vib polypeptide 2 (testis) [Source:HGNC Symbol;Acc:24380]    |  |
| <b>CPA1</b>   | Carboxypeptidase A1 (pancreatic) [Source:HGNC Symbol;Acc:2296]                            |  |
| <b>CPA2</b>   | Carboxypeptidase A2 (pancreatic) [Source:HGNC Symbol;Acc:2297]                            |  |
| <b>CPA3</b>   | Carboxypeptidase A3 (mast cell) [Source:HGNC Symbol;Acc:2298]                             |  |
| <b>CPA5</b>   | Carboxypeptidase A5 [Source:HGNC Symbol;Acc:15722]                                        |  |
| <b>CPAMD8</b> | C3 and PZP-like, alpha-2-macroglobulin domain containing 8 [Source:HGNC Symbol;Acc:23228] |  |
| <b>CPB1</b>   | Carboxypeptidase B1 (tissue) [Source:HGNC Symbol;Acc:2299]                                |  |
| <b>CPEB1</b>  | Cytoplasmic polyadenylation element binding protein 1 [Source:HGNC Symbol;Acc:21744]      |  |
| <b>CPLX4</b>  | Complexin 4 [Source:HGNC Symbol;Acc:24330]                                                |  |
| <b>CPM</b>    | Carboxypeptidase M [Source:HGNC Symbol;Acc:2311]                                          |  |
| <b>CPNE2</b>  | Copine II [Source:HGNC Symbol;Acc:2315]                                                   |  |
| <b>CPNE3</b>  | Copine III [Source:HGNC Symbol;Acc:2316]                                                  |  |
| <b>CPNE4</b>  | Copine IV [Source:HGNC Symbol;Acc:2317]                                                   |  |
| <b>CPNE5</b>  | Copine V [Source:HGNC Symbol;Acc:2318]                                                    |  |
| <b>CPNE8</b>  | Copine VIII [Source:HGNC Symbol;Acc:23498]                                                |  |
| <b>CPNE9</b>  | Copine family member IX [Source:HGNC Symbol;Acc:24336]                                    |  |
| <b>CPOX</b>   | Coproporphyrinogen oxidase [Source:HGNC Symbol;Acc:2321]                                  |  |
| <b>CPPED1</b> | Calcineurin-like phosphoesterase domain containing 1 [Source:HGNC Symbol;Acc:25632]       |  |
| <b>CPSF2</b>  | Cleavage and polyadenylation specific factor 2, 100kda [Source:HGNC Symbol;Acc:2325]      |  |
| <b>CPSF4L</b> | Cleavage and polyadenylation specific factor 4-like [Source:HGNC Symbol;Acc:33632]        |  |
| <b>CPT1A</b>  | Carnitine palmitoyltransferase 1A (liver) [Source:HGNC Symbol;Acc:2328]                   |  |
| <b>CPT1B</b>  | Carnitine palmitoyltransferase 1B (muscle) [Source:HGNC Symbol;Acc:2329]                  |  |
| <b>CR1</b>    | Complement component (3b/4b) receptor 1 (Knops blood group) [Source:HGNC Symbol;Acc:2334] |  |

|                   |                                                                                          |   |
|-------------------|------------------------------------------------------------------------------------------|---|
| <b>CR1L</b>       | Complement component (3b/4b) receptor 1-like [Source:HGNC Symbol;Acc:2335]               |   |
| <b>CR2</b>        | Complement component (3d/Epstein Barr virus) receptor 2 [Source:HGNC Symbol;Acc:2336]    |   |
| <b>CR381653.1</b> |                                                                                          |   |
| <b>CRAMP1L</b>    | Crm, cramped-like (Drosophila) [Source:HGNC Symbol;Acc:14122]                            |   |
| <b>CRAT</b>       | Carnitine O-acetyltransferase [Source:HGNC Symbol;Acc:2342]                              |   |
| <b>CRB1</b>       | Crumbs homolog 1 (Drosophila) [Source:HGNC Symbol;Acc:2343]                              |   |
| <b>CRB2</b>       | Crumbs homolog 2 (Drosophila) [Source:HGNC Symbol;Acc:18688]                             |   |
| <b>CRCP</b>       | CGRP receptor component [Source:HGNC Symbol;Acc:17888]                                   |   |
| <b>CREB1</b>      | cAMP responsive element binding protein 1                                                | √ |
| <b>CREB3</b>      | cAMP responsive element binding protein 3 [Source:HGNC Symbol;Acc:2347]                  |   |
| <b>CREB3L2</b>    | cAMP responsive element binding protein 3-like 2                                         | √ |
| <b>CREB5</b>      | cAMP responsive element binding protein 5 [Source:HGNC Symbol;Acc:16844]                 |   |
| <b>CREG2</b>      | Cellular repressor of E1A-stimulated genes 2 [Source:HGNC Symbol;Acc:14272]              |   |
| <b>CRELD1</b>     | Cysteine-rich with EGF-like domains 1 [Source:HGNC Symbol;Acc:14630]                     |   |
| <b>CRELD2</b>     | Cysteine-rich with EGF-like domains 2 [Source:HGNC Symbol;Acc:28150]                     |   |
| <b>CRHR2</b>      | Corticotropin releasing hormone receptor 2 [Source:HGNC Symbol;Acc:2358]                 |   |
| <b>CRIM1</b>      | Cysteine rich transmembrane BMP regulator 1 (chordin-like) [Source:HGNC Symbol;Acc:2359] |   |
| <b>CRIPAK</b>     | Cysteine-rich PAK1 inhibitor [Source:HGNC Symbol;Acc:26619]                              |   |
| <b>CRISPLD2</b>   | Cysteine-rich secretory protein LCCL domain containing 2 [Source:HGNC Symbol;Acc:25248]  |   |
| <b>CRK</b>        | V-crk sarcoma virus CT10 oncogene homolog (avian) [Source:HGNC Symbol;Acc:2362]          |   |
| <b>CRKL</b>       | V-crk sarcoma virus CT10 oncogene homolog (avian)-like [Source:HGNC Symbol;Acc:2363]     |   |
| <b>CRLF3</b>      | Cytokine receptor-like factor 3 [Source:HGNC Symbol;Acc:17177]                           |   |
| <b>CRLS1</b>      | Cardiolipin synthase 1 [Source:HGNC Symbol;Acc:16148]                                    |   |

|                   |                                                                                                                  |   |
|-------------------|------------------------------------------------------------------------------------------------------------------|---|
| <b>CRMP1</b>      | Collapsin response mediator protein 1 [Source:HGNC Symbol;Acc:2365]                                              |   |
| <b>CROCC</b>      | Ciliary rootlet coiled-coil, rootletin [Source:HGNC Symbol;Acc:21299]                                            |   |
| <b>CROT</b>       | Carnitine O-octanoyltransferase [Source:HGNC Symbol;Acc:2366]                                                    |   |
| <b>CRTC2</b>      | CREB regulated transcription coactivator 2 [Source:HGNC Symbol;Acc:27301]                                        |   |
| <b>CRTC3</b>      | CREB regulated transcription coactivator 3                                                                       | √ |
| <b>CRX</b>        | Cone-rod homeobox [Source:HGNC Symbol;Acc:2383]                                                                  |   |
| <b>CRY2</b>       | Cryptochrome 2 (photolyase-like) [Source:HGNC Symbol;Acc:2385]                                                   |   |
| <b>CRYBA2</b>     | Crystallin, beta A2 [Source:HGNC Symbol;Acc:2395]                                                                |   |
| <b>CRYBB1</b>     | Crystallin, beta B1 [Source:HGNC Symbol;Acc:2397]                                                                |   |
| <b>CRYGA</b>      | Crystallin, gamma A [Source:HGNC Symbol;Acc:2408]                                                                |   |
| <b>CRYGC</b>      | Crystallin, gamma C [Source:HGNC Symbol;Acc:2410]                                                                |   |
| <b>CRYGD</b>      | Crystallin, gamma D [Source:HGNC Symbol;Acc:2411]                                                                |   |
| <b>CRYM</b>       | Crystallin, mu [Source:HGNC Symbol;Acc:2418]                                                                     |   |
| <b>CS</b>         | Citrate synthase [Source:HGNC Symbol;Acc:2422]                                                                   |   |
| <b>CSAD</b>       | Cysteine sulfinic acid decarboxylase [Source:HGNC Symbol;Acc:18966]                                              |   |
| <b>CSDC2</b>      | Cold shock domain containing C2, RNA binding [Source:HGNC Symbol;Acc:30359]                                      |   |
| <b>CSDE1</b>      | Cold shock domain containing E1, RNA-binding [Source:HGNC Symbol;Acc:29905]                                      |   |
| <b>CSF2RA</b>     | Colony stimulating factor 2 receptor, alpha, low-affinity (granulocyte-macrophage) [Source:HGNC Symbol;Acc:2435] |   |
| <b>CSF2RB</b>     | Colony stimulating factor 2 receptor, beta, low-affinity (granulocyte-macrophage) [Source:HGNC Symbol;Acc:2436]  |   |
| <b>CSGALNACT2</b> | Chondroitin sulfate N-acetylgalactosaminyltransferase 2 [Source:HGNC Symbol;Acc:24292]                           |   |
| <b>CSMD1</b>      | CUB and Sushi multiple domains 1 [Source:HGNC Symbol;Acc:14026]                                                  |   |
| <b>CSMD2</b>      | CUB and Sushi multiple domains 2 [Source:HGNC Symbol;Acc:19290]                                                  |   |
| <b>CSNK1G1</b>    | Casein kinase 1, gamma 1 [Source:HGNC Symbol;Acc:2454]                                                           |   |
| <b>CSNK1G3</b>    | Casein kinase 1, gamma 3 [Source:HGNC Symbol;Acc:2456]                                                           |   |
| <b>CSPG4</b>      | Chondroitin sulfate proteoglycan 4 [Source:HGNC Symbol;Acc:2466]                                                 |   |
| <b>CSRNP1</b>     | Cysteine-serine-rich nuclear protein 1 [Source:HGNC Symbol;Acc:14300]                                            |   |
| <b>CSRNP3</b>     | Cysteine-serine-rich nuclear protein 3 [Source:HGNC Symbol;Acc:30729]                                            |   |



|                     |                                                                                                                              |   |
|---------------------|------------------------------------------------------------------------------------------------------------------------------|---|
| <b>CTB-25P15.2</b>  | ANKHD1-EIF4EBP3 protein [Source:refseq peptide;Acc:NP_065741]                                                                |   |
| <b>CTBP1</b>        | C-terminal binding protein 1 [Source:HGNC Symbol;Acc:2494]                                                                   |   |
| <b>CTBP2</b>        | C-terminal binding protein 2 [Source:HGNC Symbol;Acc:2495]                                                                   |   |
| <b>CTC1</b>         | CTS telomere maintenance complex component 1 [Source:HGNC Symbol;Acc:26169]                                                  |   |
| <b>CTCF</b>         | CCCTC-binding factor (zinc finger protein) [Source:HGNC Symbol;Acc:13723]                                                    |   |
| <b>CTCFL</b>        | CCCTC-binding factor (zinc finger protein)-like [Source:HGNC Symbol;Acc:16234]                                               |   |
| <b>CTD-2170G1.1</b> | Uncharacterized protein FLJ37543 [Source:uniprotkb/Swiss-Prot;Acc:Q2M2E5]                                                    |   |
| <b>CTDSP2</b>       | CTD (carboxy-terminal domain, RNA polymerase II, polypeptide A) small phosphatase 2 [Source:HGNC Symbol;Acc:17077]           |   |
| <b>CTDSPL</b>       | CTD (carboxy-terminal domain, RNA polymerase II, polypeptide A) small phosphatase-like [Source:HGNC Symbol;Acc:16890]        |   |
| <b>CTGF</b>         | Connective tissue growth factor [Source:HGNC Symbol;Acc:2500]                                                                |   |
| <b>CTHRC1</b>       | Collagen triple helix repeat containing 1 [Source:HGNC Symbol;Acc:18831]                                                     |   |
| <b>CTNNB1</b>       | Catenin (cadherin-associated protein), beta 1, 88 kDa                                                                        | √ |
| <b>CTNNBIP1</b>     | Catenin, beta interacting protein 1 [Source:HGNC Symbol;Acc:16913]                                                           |   |
| <b>CTNNBL1</b>      | Catenin, beta like 1 [Source:HGNC Symbol;Acc:15879]                                                                          |   |
| <b>CTNND1</b>       | Catenin (cadherin-associated protein), delta 1 [Source:HGNC Symbol;Acc:2515]                                                 |   |
| <b>CTNND2</b>       | Catenin (cadherin-associated protein), delta 2 (neural plakophilin-related arm-repeat protein) [Source:HGNC Symbol;Acc:2516] |   |
| <b>CTPS2</b>        | CTP synthase II [Source:HGNC Symbol;Acc:2520]                                                                                |   |
| <b>CTSA</b>         | Cathepsin A [Source:HGNC Symbol;Acc:9251]                                                                                    |   |
| <b>CTSC</b>         | Cathepsin C [Source:HGNC Symbol;Acc:2528]                                                                                    |   |
| <b>CTSZ</b>         | Cathepsin Z [Source:HGNC Symbol;Acc:2547]                                                                                    |   |
| <b>CTTNBP2</b>      | Cortactin binding protein 2 [Source:HGNC Symbol;Acc:15679]                                                                   |   |
| <b>CTXN1</b>        | Cortexin 1 [Source:HGNC Symbol;Acc:31108]                                                                                    |   |
| <b>CUBN</b>         | Cubilin (intrinsic factor-cobalamin receptor) [Source:HGNC Symbol;Acc:2548]                                                  |   |
| <b>CUEDC2</b>       | CUE domain containing 2 [Source:HGNC Symbol;Acc:28352]                                                                       |   |

|                 |                                                                                             |   |
|-----------------|---------------------------------------------------------------------------------------------|---|
| <b>CUL2</b>     | Cullin 2 [Source:HGNC Symbol;Acc:2552]                                                      |   |
| <b>CUL3</b>     | Cullin 3 [Source:HGNC Symbol;Acc:2553]                                                      |   |
| <b>CUL4B</b>    | Cullin 4B [Source:HGNC Symbol;Acc:2555]                                                     |   |
| <b>CUL7</b>     | Cullin 7 [Source:HGNC Symbol;Acc:21024]                                                     |   |
| <b>CUX1</b>     | Cut-like homeobox 1 [Source:HGNC Symbol;Acc:2557]                                           |   |
| <b>CWC22</b>    | CWC22 spliceosome-associated protein homolog (S. Cerevisiae) [Source:HGNC Symbol;Acc:29322] |   |
| <b>CWC27</b>    | CWC27 spliceosome-associated protein homolog (S. Cerevisiae) [Source:HGNC Symbol;Acc:10664] |   |
| <b>CXCL5</b>    | Chemokine (C-X-C motif) ligand 5 [Source:HGNC Symbol;Acc:10642]                             |   |
| <b>CXCL9</b>    | Chemokine (C-X-C motif) ligand 9 [Source:HGNC Symbol;Acc:7098]                              |   |
| <b>CXCR4</b>    | Chemokine (C-X-C motif) receptor 4 [Source:HGNC Symbol;Acc:2561]                            |   |
| <b>CXCR5</b>    | Chemokine (C-X-C motif) receptor 5 [Source:HGNC Symbol;Acc:1060]                            |   |
| <b>CXCR6</b>    | Chemokine (C-X-C motif) receptor 6 [Source:HGNC Symbol;Acc:16647]                           |   |
| <b>CXorf23</b>  | Chromosome X open reading frame 23 [Source:HGNC Symbol;Acc:27413]                           |   |
| <b>CXorf26</b>  | Chromosome X open reading frame 26 [Source:HGNC Symbol;Acc:28790]                           |   |
| <b>CXorf31</b>  | Chromosome X open reading frame 31 [Source:HGNC Symbol;Acc:17986]                           |   |
| <b>CXorf36</b>  | Chromosome X open reading frame 36 [Source:HGNC Symbol;Acc:25866]                           |   |
| <b>CXorf38</b>  | Chromosome X open reading frame 38 [Source:HGNC Symbol;Acc:28589]                           |   |
| <b>CXorf40B</b> | Chromosome X open reading frame 40B [Source:HGNC Symbol;Acc:17402]                          |   |
| <b>CXorf56</b>  | Chromosome X open reading frame 56 [Source:HGNC Symbol;Acc:26239]                           |   |
| <b>CXorf57</b>  | Chromosome X open reading frame 57 [Source:HGNC Symbol;Acc:25486]                           |   |
| <b>CXorf58</b>  | Chromosome X open reading frame 58 [Source:HGNC Symbol;Acc:26356]                           |   |
| <b>CXXC4</b>    | CXXC finger protein 4 [Source:HGNC Symbol;Acc:24593]                                        |   |
| <b>CYB5B</b>    | Cytochrome b5 type B (outer mitochondrial membrane) [Source:HGNC Symbol;Acc:24374]          |   |
| <b>CYB5D1</b>   | Cytochrome b5 domain containing 1 [Source:HGNC Symbol;Acc:26516]                            |   |
| <b>CYB5R2</b>   | Cytochrome b5 reductase 2 [Source:HGNC Symbol;Acc:24376]                                    |   |
| <b>CYBRD1</b>   | Cytochrome b reductase 1 [Source:HGNC Symbol;Acc:20797]                                     |   |
| <b>CYLD</b>     | Cylindromatosis (turban tumor syndrome)                                                     | √ |
| <b>CYP11A1</b>  | Cytochrome P450, family 11, subfamily A, polypeptide 1 [Source:HGNC Symbol;Acc:2590]        |   |

|                 |                                                                                                  |  |
|-----------------|--------------------------------------------------------------------------------------------------|--|
| <b>CYP11B2</b>  | Cytochrome P450, family 11, subfamily B, polypeptide 2 [Source:HGNC Symbol;Acc:2592]             |  |
| <b>CYP19A1</b>  | Cytochrome P450, family 19, subfamily A, polypeptide 1 [Source:HGNC Symbol;Acc:2594]             |  |
| <b>CYP2B6</b>   | Cytochrome P450, family 2, subfamily B, polypeptide 6 [Source:HGNC Symbol;Acc:2615]              |  |
| <b>CYP2C19</b>  | Cytochrome P450, family 2, subfamily C, polypeptide 19 [Source:HGNC Symbol;Acc:2621]             |  |
| <b>CYP2C8</b>   | Cytochrome P450, family 2, subfamily C, polypeptide 8 [Source:HGNC Symbol;Acc:2622]              |  |
| <b>CYP2D6</b>   | Cytochrome P450, family 2, subfamily D, polypeptide 6 [Source:HGNC Symbol;Acc:2625]              |  |
| <b>CYP2D7P1</b> | Cytochrome P450, family 2, subfamily D, polypeptide 7 pseudogene 1 [Source:HGNC Symbol;Acc:2624] |  |
| <b>CYP2R1</b>   | Cytochrome P450, family 2, subfamily R, polypeptide 1 [Source:HGNC Symbol;Acc:20580]             |  |
| <b>CYP2U1</b>   | Cytochrome P450, family 2, subfamily U, polypeptide 1 [Source:HGNC Symbol;Acc:20582]             |  |
| <b>CYP3A4</b>   | Cytochrome P450, family 3, subfamily A, polypeptide 4 [Source:HGNC Symbol;Acc:2637]              |  |
| <b>CYP3A43</b>  | Cytochrome P450, family 3, subfamily A, polypeptide 43 [Source:HGNC Symbol;Acc:17450]            |  |
| <b>CYP3A5</b>   | Cytochrome P450, family 3, subfamily A, polypeptide 5 [Source:HGNC Symbol;Acc:2638]              |  |
| <b>CYP3A7</b>   | Cytochrome P450, family 3, subfamily A, polypeptide 7 [Source:HGNC Symbol;Acc:2640]              |  |
| <b>CYP4A22</b>  | Cytochrome P450, family 4, subfamily A, polypeptide 22 [Source:HGNC Symbol;Acc:20575]            |  |
| <b>CYP4F12</b>  | Cytochrome P450, family 4, subfamily F, polypeptide 12 [Source:HGNC Symbol;Acc:18857]            |  |
| <b>CYP4F2</b>   | Cytochrome P450, family 4, subfamily F, polypeptide 2 [Source:HGNC Symbol;Acc:2645]              |  |

|                 |                                                                                               |  |
|-----------------|-----------------------------------------------------------------------------------------------|--|
| <b>CYP4F8</b>   | Cytochrome P450, family 4, subfamily F, polypeptide 8 [Source:HGNC Symbol;Acc:2648]           |  |
| <b>CYP4Z1</b>   | Cytochrome P450, family 4, subfamily Z, polypeptide 1 [Source:HGNC Symbol;Acc:20583]          |  |
| <b>CYR61</b>    | Cysteine-rich, angiogenic inducer, 61 [Source:HGNC Symbol;Acc:2654]                           |  |
| <b>CYSLTR2</b>  | Cysteinyl leukotriene receptor 2 [Source:HGNC Symbol;Acc:18274]                               |  |
| <b>CYTH2</b>    | Cytohesin 2 [Source:HGNC Symbol;Acc:9502]                                                     |  |
| <b>CYTH3</b>    | Cytohesin 3 [Source:HGNC Symbol;Acc:9504]                                                     |  |
| <b>CYTH4</b>    | Cytohesin 4 [Source:HGNC Symbol;Acc:9505]                                                     |  |
| <b>D2HGDH</b>   | D-2-hydroxyglutarate dehydrogenase [Source:HGNC Symbol;Acc:28358]                             |  |
| <b>D87023.1</b> | Immunoglobulin lambda-like polypeptide 5 [Source:refseq peptide;Acc:NP_001171597]             |  |
| <b>DAAM1</b>    | Dishevelled associated activator of morphogenesis 1 [Source:HGNC Symbol;Acc:18142]            |  |
| <b>DAAM2</b>    | Dishevelled associated activator of morphogenesis 2 [Source:HGNC Symbol;Acc:18143]            |  |
| <b>DAB2IP</b>   | DAB2 interacting protein [Source:HGNC Symbol;Acc:17294]                                       |  |
| <b>DACH2</b>    | Dachshund homolog 2 (Drosophila) [Source:HGNC Symbol;Acc:16814]                               |  |
| <b>DACT1</b>    | Dapper, antagonist of beta-catenin, homolog 1 (Xenopus laevis) [Source:HGNC Symbol;Acc:17748] |  |
| <b>DAG1</b>     | Dystroglycan 1 (dystrophin-associated glycoprotein 1) [Source:HGNC Symbol;Acc:2666]           |  |
| <b>DAGLA</b>    | Diacylglycerol lipase, alpha [Source:HGNC Symbol;Acc:1165]                                    |  |
| <b>DAGLB</b>    | Diacylglycerol lipase, beta [Source:HGNC Symbol;Acc:28923]                                    |  |
| <b>DAPK1</b>    | Death-associated protein kinase 1 [Source:HGNC Symbol;Acc:2674]                               |  |
| <b>DAPK2</b>    | Death-associated protein kinase 2 [Source:HGNC Symbol;Acc:2675]                               |  |
| <b>DARC</b>     | Duffy blood group, chemokine receptor [Source:HGNC Symbol;Acc:4035]                           |  |
| <b>DAZ1</b>     | Deleted in azoospermia 1 [Source:HGNC Symbol;Acc:2682]                                        |  |
| <b>DAZ2</b>     | Deleted in azoospermia 2 [Source:HGNC Symbol;Acc:15964]                                       |  |
| <b>DAZ3</b>     | Deleted in azoospermia 3 [Source:HGNC Symbol;Acc:15965]                                       |  |
| <b>DAZ4</b>     | Deleted in azoospermia 4 [Source:HGNC Symbol;Acc:15966]                                       |  |
| <b>DBF4B</b>    | DBF4 homolog B (S. Cerevisiae) [Source:HGNC Symbol;Acc:17883]                                 |  |

|                |                                                                                                               |  |
|----------------|---------------------------------------------------------------------------------------------------------------|--|
| <b>DBNDD2</b>  | Dysbindin (dystrobrevin binding protein 1) domain containing 2 [Source:HGNC Symbol;Acc:15881]                 |  |
| <b>DBNL</b>    | Drebrin-like [Source:HGNC Symbol;Acc:2696]                                                                    |  |
| <b>DBP</b>     | D site of albumin promoter (albumin D-box) binding protein [Source:HGNC Symbol;Acc:2697]                      |  |
| <b>DBX2</b>    | Developing brain homeobox 2 [Source:HGNC Symbol;Acc:33186]                                                    |  |
| <b>DCAF11</b>  | DDB1 and CUL4 associated factor 11 [Source:HGNC Symbol;Acc:20258]                                             |  |
| <b>DCAF4</b>   | DDB1 and CUL4 associated factor 4 [Source:HGNC Symbol;Acc:20229]                                              |  |
| <b>DCAF4L1</b> | DDB1 and CUL4 associated factor 4-like 1 [Source:HGNC Symbol;Acc:27723]                                       |  |
| <b>DCAF7</b>   | DDB1 and CUL4 associated factor 7 [Source:HGNC Symbol;Acc:30915]                                              |  |
| <b>DCBLD1</b>  | Discoidin, CUB and LCCL domain containing 1 [Source:HGNC Symbol;Acc:21479]                                    |  |
| <b>DCC</b>     | Deleted in colorectal carcinoma [Source:HGNC Symbol;Acc:2701]                                                 |  |
| <b>DCDC1</b>   | Doublecortin domain containing 1 [Source:HGNC Symbol;Acc:20625]                                               |  |
| <b>DCDC5</b>   | Doublecortin domain containing 5 [Source:HGNC Symbol;Acc:24799]                                               |  |
| <b>DCHS1</b>   | Dachsous 1 (Drosophila) [Source:HGNC Symbol;Acc:13681]                                                        |  |
| <b>DCHS2</b>   | Dachsous 2 (Drosophila) [Source:HGNC Symbol;Acc:23111]                                                        |  |
| <b>DCI</b>     | Dodecenoyl-coa isomerase [Source:HGNC Symbol;Acc:2703]                                                        |  |
| <b>DCK</b>     | Deoxycytidine kinase [Source:HGNC Symbol;Acc:2704]                                                            |  |
| <b>DCLK1</b>   | Doublecortin-like kinase 1 [Source:HGNC Symbol;Acc:2700]                                                      |  |
| <b>DCLRE1A</b> | DNA cross-link repair 1A [Source:HGNC Symbol;Acc:17660]                                                       |  |
| <b>DCLRE1C</b> | DNA cross-link repair 1C [Source:HGNC Symbol;Acc:17642]                                                       |  |
| <b>DCN</b>     | Decorin [Source:HGNC Symbol;Acc:2705]                                                                         |  |
| <b>DCT</b>     | Dopachrome tautomerase (dopachrome delta-isomerase, tyrosine-related protein 2) [Source:HGNC Symbol;Acc:2709] |  |
| <b>DCTD</b>    | Dcmp deaminase [Source:HGNC Symbol;Acc:2710]                                                                  |  |
| <b>DCTN1</b>   | Dynactin 1 [Source:HGNC Symbol;Acc:2711]                                                                      |  |
| <b>DCTN3</b>   | Dynactin 3 (p22) [Source:HGNC Symbol;Acc:2713]                                                                |  |
| <b>DCUN1D1</b> | DCN1, defective in cullin neddylation 1, domain containing 1 (S. Cerevisiae) [Source:HGNC Symbol;Acc:18184]   |  |
| <b>DCUN1D2</b> | DCN1, defective in cullin neddylation 1, domain containing 2 (S. Cerevisiae) [Source:HGNC Symbol;Acc:20328]   |  |

|                |                                                                                                             |  |
|----------------|-------------------------------------------------------------------------------------------------------------|--|
| <b>DCUN1D3</b> | DCN1, defective in cullin neddylation 1, domain containing 3 (S. Cerevisiae) [Source:HGNC Symbol;Acc:28734] |  |
| <b>DCUN1D4</b> | DCN1, defective in cullin neddylation 1, domain containing 4 (S. Cerevisiae) [Source:HGNC Symbol;Acc:28998] |  |
| <b>DDA1</b>    | DET1 and DDB1 associated 1 [Source:HGNC Symbol;Acc:28360]                                                   |  |
| <b>DDAH1</b>   | Dimethylarginine dimethylaminohydrolase 1 [Source:HGNC Symbol;Acc:2715]                                     |  |
| <b>DDB1</b>    | Damage-specific DNA binding protein 1, 127kda [Source:HGNC Symbol;Acc:2717]                                 |  |
| <b>DDI1</b>    | DNA-damage inducible 1 homolog 1 (S. Cerevisiae) [Source:HGNC Symbol;Acc:18961]                             |  |
| <b>DDI2</b>    | DNA-damage inducible 1 homolog 2 (S. Cerevisiae) [Source:HGNC Symbol;Acc:24578]                             |  |
| <b>DDIT4L</b>  | DNA-damage-inducible transcript 4-like [Source:HGNC Symbol;Acc:30555]                                       |  |
| <b>DDN</b>     | Dendrin [Source:HGNC Symbol;Acc:24458]                                                                      |  |
| <b>DDR1</b>    | Discoidin domain receptor tyrosine kinase 1 [Source:HGNC Symbol;Acc:2730]                                   |  |
| <b>DDR2</b>    | Discoidin domain receptor tyrosine kinase 2 [Source:HGNC Symbol;Acc:2731]                                   |  |
| <b>DDX1</b>    | DEAD (Asp-Glu-Ala-Asp) box polypeptide 1 [Source:HGNC Symbol;Acc:2734]                                      |  |
| <b>DDX11</b>   | DEAD/H (Asp-Glu-Ala-Asp/His) box polypeptide 11 [Source:HGNC Symbol;Acc:2736]                               |  |
| <b>DDX17</b>   | DEAD (Asp-Glu-Ala-Asp) box polypeptide 17 [Source:HGNC Symbol;Acc:2740]                                     |  |
| <b>DDX19A</b>  | DEAD (Asp-Glu-Ala-As) box polypeptide 19A [Source:HGNC Symbol;Acc:25628]                                    |  |
| <b>DDX27</b>   | DEAD (Asp-Glu-Ala-Asp) box polypeptide 27 [Source:HGNC Symbol;Acc:15837]                                    |  |
| <b>DDX39A</b>  | DEAD (Asp-Glu-Ala-Asp) box polypeptide 39A [Source:HGNC Symbol;Acc:17821]                                   |  |

|                |                                                                                                   |   |
|----------------|---------------------------------------------------------------------------------------------------|---|
| <b>DDX39B</b>  | DEAD (Asp-Glu-Ala-Asp) box polypeptide 39B [Source:HGNC Symbol;Acc:13917]                         |   |
| <b>DDX3X</b>   | DEAD (Asp-Glu-Ala-Asp) box polypeptide 3, X-linked [Source:HGNC Symbol;Acc:2745]                  |   |
| <b>DDX3Y</b>   | DEAD (Asp-Glu-Ala-Asp) box polypeptide 3, Y-linked [Source:HGNC Symbol;Acc:2699]                  |   |
| <b>DDX43</b>   | DEAD (Asp-Glu-Ala-Asp) box polypeptide 43 [Source:HGNC Symbol;Acc:18677]                          |   |
| <b>DDX47</b>   | DEAD (Asp-Glu-Ala-Asp) box polypeptide 47 [Source:HGNC Symbol;Acc:18682]                          |   |
| <b>DDX5</b>    | DEAD (Asp-Glu-Ala-Asp) box polypeptide 5                                                          | √ |
| <b>DDX51</b>   | DEAD (Asp-Glu-Ala-Asp) box polypeptide 51 [Source:HGNC Symbol;Acc:20082]                          |   |
| <b>DDX52</b>   | DEAD (Asp-Glu-Ala-Asp) box polypeptide 52 [Source:HGNC Symbol;Acc:20038]                          |   |
| <b>DDX53</b>   | DEAD (Asp-Glu-Ala-Asp) box polypeptide 53 [Source:HGNC Symbol;Acc:20083]                          |   |
| <b>DDX59</b>   | DEAD (Asp-Glu-Ala-Asp) box polypeptide 59 [Source:HGNC Symbol;Acc:25360]                          |   |
| <b>DECR1</b>   | 2,4-dienoyl coa reductase 1, mitochondrial [Source:HGNC Symbol;Acc:2753]                          |   |
| <b>DEDD</b>    | Death effector domain containing [Source:HGNC Symbol;Acc:2755]                                    |   |
| <b>DEF6</b>    | Differentially expressed in FDCP 6 homolog (mouse) [Source:HGNC Symbol;Acc:2760]                  |   |
| <b>DEF8</b>    | Differentially expressed in FDCP 8 homolog (mouse) [Source:HGNC Symbol;Acc:25969]                 |   |
| <b>DEFB119</b> | Defensin, beta 119 [Source:HGNC Symbol;Acc:18099]                                                 |   |
| <b>DEGS1</b>   | Degenerative spermatocyte homolog 1, lipid desaturase (Drosophila) [Source:HGNC Symbol;Acc:13709] |   |
| <b>DENND2C</b> | DENN/MADD domain containing 2C [Source:HGNC Symbol;Acc:24748]                                     |   |
| <b>DENND3</b>  | DENN/MADD domain containing 3 [Source:HGNC Symbol;Acc:29134]                                      |   |
| <b>DENND4A</b> | DENN/MADD domain containing 4A [Source:HGNC Symbol;Acc:24321]                                     |   |
| <b>DENND4B</b> | DENN/MADD domain containing 4B [Source:HGNC Symbol;Acc:29044]                                     |   |

|                |                                                                                       |  |
|----------------|---------------------------------------------------------------------------------------|--|
| <b>DENND5A</b> | DENN/MADD domain containing 5A [Source:HGNC Symbol;Acc:19344]                         |  |
| <b>DENND5B</b> | DENN/MADD domain containing 5B [Source:HGNC Symbol;Acc:28338]                         |  |
| <b>DET1</b>    | De-etiolated homolog 1 (Arabidopsis) [Source:HGNC Symbol;Acc:25477]                   |  |
| <b>DEXI</b>    | Dexi homolog (mouse) [Source:HGNC Symbol;Acc:13267]                                   |  |
| <b>DFNA5</b>   | Deafness, autosomal dominant 5 [Source:HGNC Symbol;Acc:2810]                          |  |
| <b>DFNB59</b>  | Deafness, autosomal recessive 59 [Source:HGNC Symbol;Acc:29502]                       |  |
| <b>DGCR8</b>   | Digeorge syndrome critical region gene 8 [Source:HGNC Symbol;Acc:2847]                |  |
| <b>DGKA</b>    | Diacylglycerol kinase, alpha 80kda [Source:HGNC Symbol;Acc:2849]                      |  |
| <b>DGKB</b>    | Diacylglycerol kinase, beta 90kda [Source:HGNC Symbol;Acc:2850]                       |  |
| <b>DGKD</b>    | Diacylglycerol kinase, delta 130kda [Source:HGNC Symbol;Acc:2851]                     |  |
| <b>DGKG</b>    | Diacylglycerol kinase, gamma 90kda [Source:HGNC Symbol;Acc:2853]                      |  |
| <b>DGKH</b>    | Diacylglycerol kinase, eta [Source:HGNC Symbol;Acc:2854]                              |  |
| <b>DGKQ</b>    | Diacylglycerol kinase, theta 110kda [Source:HGNC Symbol;Acc:2856]                     |  |
| <b>DGKZ</b>    | Diacylglycerol kinase, zeta [Source:HGNC Symbol;Acc:2857]                             |  |
| <b>DGUOK</b>   | Deoxyguanosine kinase [Source:HGNC Symbol;Acc:2858]                                   |  |
| <b>DHODH</b>   | Dihydroorotate dehydrogenase [Source:HGNC Symbol;Acc:2867]                            |  |
| <b>DHRS1</b>   | Dehydrogenase/reductase (SDR family) member 1 [Source:HGNC Symbol;Acc:16445]          |  |
| <b>DHRS11</b>  | Dehydrogenase/reductase (SDR family) member 11 [Source:HGNC Symbol;Acc:28639]         |  |
| <b>DHRS2</b>   | Dehydrogenase/reductase (SDR family) member 2 [Source:HGNC Symbol;Acc:18349]          |  |
| <b>DHRS3</b>   | Dehydrogenase/reductase (SDR family) member 3 [Source:HGNC Symbol;Acc:17693]          |  |
| <b>DHRS4</b>   | Dehydrogenase/reductase (SDR family) member 4 [Source:HGNC Symbol;Acc:16985]          |  |
| <b>DHRS4L2</b> | Dehydrogenase/reductase (SDR family) member 4 like 2 [Source:HGNC Symbol;Acc:19731]   |  |
| <b>DHTKD1</b>  | Dehydrogenase E1 and transketolase domain containing 1 [Source:HGNC Symbol;Acc:23537] |  |
| <b>DHX16</b>   | DEAH (Asp-Glu-Ala-His) box polypeptide 16 [Source:HGNC Symbol;Acc:2739]               |  |



|               |                                                                                        |   |
|---------------|----------------------------------------------------------------------------------------|---|
| <b>DHX35</b>  | DEAH (Asp-Glu-Ala-His) box polypeptide 35 [Source:HGNC Symbol;Acc:15861]               |   |
| <b>DHX38</b>  | DEAH (Asp-Glu-Ala-His) box polypeptide 38 [Source:HGNC Symbol;Acc:17211]               |   |
| <b>DHX58</b>  | DEXH (Asp-Glu-X-His) box polypeptide 58 [Source:HGNC Symbol;Acc:29517]                 |   |
| <b>DHX8</b>   | DEAH (Asp-Glu-Ala-His) box polypeptide 8 [Source:HGNC Symbol;Acc:2749]                 |   |
| <b>DIABLO</b> | Diablo homolog (Drosophila) [Source:HGNC Symbol;Acc:21528]                             |   |
| <b>DIAPH2</b> | Diaphanous homolog 2 (Drosophila) [Source:HGNC Symbol;Acc:2877]                        |   |
| <b>DIAPH3</b> | Diaphanous homolog 3 (Drosophila) [Source:HGNC Symbol;Acc:15480]                       |   |
| <b>DICER1</b> | Dicer 1, ribonuclease type III                                                         | √ |
| <b>DIDO1</b>  | Death inducer-obliterator 1 [Source:HGNC Symbol;Acc:2680]                              |   |
| <b>DIEXF</b>  | Digestive organ expansion factor homolog (zebrafish) [Source:HGNC Symbol;Acc:28440]    |   |
| <b>DIO3</b>   | Deiodinase, iodothyronine, type III [Source:HGNC Symbol;Acc:2885]                      |   |
| <b>DIP2B</b>  | DIP2 disco-interacting protein 2 homolog B (Drosophila) [Source:HGNC Symbol;Acc:29284] |   |
| <b>DIP2C</b>  | DIP2 disco-interacting protein 2 homolog C (Drosophila) [Source:HGNC Symbol;Acc:29150] |   |
| <b>DIRAS1</b> | DIRAS family, GTP-binding RAS-like 1 [Source:HGNC Symbol;Acc:19127]                    |   |
| <b>DIS3L</b>  | DIS3 mitotic control homolog (S. Cerevisiae)-like [Source:HGNC Symbol;Acc:28698]       |   |
| <b>DISC1</b>  | Disrupted in schizophrenia 1 [Source:HGNC Symbol;Acc:2888]                             |   |
| <b>DISP2</b>  | Dispatched homolog 2 (Drosophila) [Source:HGNC Symbol;Acc:19712]                       |   |
| <b>DKC1</b>   | Dyskeratosis congenita 1, dyskerin [Source:HGNC Symbol;Acc:2890]                       |   |
| <b>DLAT</b>   | Dihydrolipoamide S-acetyltransferase [Source:HGNC Symbol;Acc:2896]                     |   |
| <b>DLC1</b>   | Deleted in liver cancer 1 [Source:HGNC Symbol;Acc:2897]                                |   |
| <b>DLEC1</b>  | Deleted in lung and esophageal cancer 1 [Source:HGNC Symbol;Acc:2899]                  |   |
| <b>DLEU7</b>  | Deleted in lymphocytic leukemia, 7 [Source:HGNC Symbol;Acc:17567]                      |   |
| <b>DLG2</b>   | Discs, large homolog 2 (Drosophila) [Source:HGNC Symbol;Acc:2901]                      |   |
| <b>DLG3</b>   | Discs, large homolog 3 (Drosophila) [Source:HGNC Symbol;Acc:2902]                      |   |

|               |                                                                                       |  |
|---------------|---------------------------------------------------------------------------------------|--|
| <b>DLG5</b>   | Discs, large homolog 5 (Drosophila) [Source:HGNC Symbol;Acc:2904]                     |  |
| <b>DLGAP1</b> | Discs, large (Drosophila) homolog-associated protein 1 [Source:HGNC Symbol;Acc:2905]  |  |
| <b>DLGAP2</b> | Discs, large (Drosophila) homolog-associated protein 2 [Source:HGNC Symbol;Acc:2906]  |  |
| <b>DLGAP5</b> | Discs, large (Drosophila) homolog-associated protein 5 [Source:HGNC Symbol;Acc:16864] |  |
| <b>DLK1</b>   | Delta-like 1 homolog (Drosophila) [Source:HGNC Symbol;Acc:2907]                       |  |
| <b>DLL1</b>   | Delta-like 1 (Drosophila) [Source:HGNC Symbol;Acc:2908]                               |  |
| <b>DLL3</b>   | Delta-like 3 (Drosophila) [Source:HGNC Symbol;Acc:2909]                               |  |
| <b>DLX4</b>   | Distal-less homeobox 4 [Source:HGNC Symbol;Acc:2917]                                  |  |
| <b>DLX5</b>   | Distal-less homeobox 5 [Source:HGNC Symbol;Acc:2918]                                  |  |
| <b>DMD</b>    | Dystrophin [Source:HGNC Symbol;Acc:2928]                                              |  |
| <b>DMGDH</b>  | Dimethylglycine dehydrogenase [Source:HGNC Symbol;Acc:24475]                          |  |
| <b>DMRT1</b>  | Doublesex and mab-3 related transcription factor 1 [Source:HGNC Symbol;Acc:2934]      |  |
| <b>DMRT3</b>  | Doublesex and mab-3 related transcription factor 3 [Source:HGNC Symbol;Acc:13909]     |  |
| <b>DMRTA2</b> | DMRT-like family A2 [Source:HGNC Symbol;Acc:13908]                                    |  |
| <b>DMRTC2</b> | DMRT-like family C2 [Source:HGNC Symbol;Acc:13911]                                    |  |
| <b>DMXL1</b>  | Dmx-like 1 [Source:HGNC Symbol;Acc:2937]                                              |  |
| <b>DMXL2</b>  | Dmx-like 2 [Source:HGNC Symbol;Acc:2938]                                              |  |
| <b>DNAH10</b> | Dynein, axonemal, heavy chain 10 [Source:HGNC Symbol;Acc:2941]                        |  |
| <b>DNAH11</b> | Dynein, axonemal, heavy chain 11 [Source:HGNC Symbol;Acc:2942]                        |  |
| <b>DNAH12</b> | Dynein, axonemal, heavy chain 12 [Source:HGNC Symbol;Acc:2943]                        |  |
| <b>DNAH14</b> | Dynein, axonemal, heavy chain 14 [Source:HGNC Symbol;Acc:2945]                        |  |
| <b>DNAH17</b> | Dynein, axonemal, heavy chain 17 [Source:HGNC Symbol;Acc:2946]                        |  |
| <b>DNAH2</b>  | Dynein, axonemal, heavy chain 2 [Source:HGNC Symbol;Acc:2948]                         |  |
| <b>DNAH3</b>  | Dynein, axonemal, heavy chain 3 [Source:HGNC Symbol;Acc:2949]                         |  |
| <b>DNAH5</b>  | Dynein, axonemal, heavy chain 5 [Source:HGNC Symbol;Acc:2950]                         |  |
| <b>DNAH6</b>  | Dynein, axonemal, heavy chain 6 [Source:HGNC Symbol;Acc:2951]                         |  |
| <b>DNAH7</b>  | Dynein, axonemal, heavy chain 7 [Source:HGNC Symbol;Acc:18661]                        |  |
| <b>DNAH8</b>  | Dynein, axonemal, heavy chain 8 [Source:HGNC Symbol;Acc:2952]                         |  |

|                |                                                                             |  |
|----------------|-----------------------------------------------------------------------------|--|
| <b>DNAH9</b>   | Dynein, axonemal, heavy chain 9 [Source:HGNC Symbol;Acc:2953]               |  |
| <b>DNAJB1</b>  | Dnaj (Hsp40) homolog, subfamily B, member 1 [Source:HGNC Symbol;Acc:5270]   |  |
| <b>DNAJB12</b> | Dnaj (Hsp40) homolog, subfamily B, member 12 [Source:HGNC Symbol;Acc:14891] |  |
| <b>DNAJB13</b> | Dnaj (Hsp40) homolog, subfamily B, member 13 [Source:HGNC Symbol;Acc:30718] |  |
| <b>DNAJB2</b>  | Dnaj (Hsp40) homolog, subfamily B, member 2 [Source:HGNC Symbol;Acc:5228]   |  |
| <b>DNAJB4</b>  | Dnaj (Hsp40) homolog, subfamily B, member 4 [Source:HGNC Symbol;Acc:14886]  |  |
| <b>DNAJB7</b>  | Dnaj (Hsp40) homolog, subfamily B, member 7 [Source:HGNC Symbol;Acc:24986]  |  |
| <b>DNAJC1</b>  | Dnaj (Hsp40) homolog, subfamily C, member 1 [Source:HGNC Symbol;Acc:20090]  |  |
| <b>DNAJC10</b> | Dnaj (Hsp40) homolog, subfamily C, member 10 [Source:HGNC Symbol;Acc:24637] |  |
| <b>DNAJC14</b> | Dnaj (Hsp40) homolog, subfamily C, member 14 [Source:HGNC Symbol;Acc:24581] |  |
| <b>DNAJC15</b> | Dnaj (Hsp40) homolog, subfamily C, member 15 [Source:HGNC Symbol;Acc:20325] |  |
| <b>DNAJC2</b>  | Dnaj (Hsp40) homolog, subfamily C, member 2 [Source:HGNC Symbol;Acc:13192]  |  |
| <b>DNAJC27</b> | Dnaj (Hsp40) homolog, subfamily C, member 27 [Source:HGNC Symbol;Acc:30290] |  |
| <b>DNAJC3</b>  | Dnaj (Hsp40) homolog, subfamily C, member 3 [Source:HGNC Symbol;Acc:9439]   |  |
| <b>DNAJC6</b>  | Dnaj (Hsp40) homolog, subfamily C, member 6 [Source:HGNC Symbol;Acc:15469]  |  |
| <b>DNAJC7</b>  | Dnaj (Hsp40) homolog, subfamily C, member 7 [Source:HGNC Symbol;Acc:12392]  |  |
| <b>DNASE2</b>  | Deoxyribonuclease II, lysosomal [Source:HGNC Symbol;Acc:2960]               |  |
| <b>DNER</b>    | Delta/notch-like EGF repeat containing [Source:HGNC Symbol;Acc:24456]       |  |

|                |                                                                                                                                             |   |
|----------------|---------------------------------------------------------------------------------------------------------------------------------------------|---|
| <b>DNHD1</b>   | Dynein heavy chain domain 1 [Source:HGNC Symbol;Acc:26532]                                                                                  |   |
| <b>DNLZ</b>    | DNL-type zinc finger [Source:HGNC Symbol;Acc:33879]                                                                                         |   |
| <b>DNM2</b>    | Dynamamin 2                                                                                                                                 | √ |
| <b>DNMBP</b>   | Dynamamin binding protein [Source:HGNC Symbol;Acc:30373]                                                                                    |   |
| <b>DNMT1</b>   | DNA (cytosine-5-)-methyltransferase 1 [Source:HGNC Symbol;Acc:2976]                                                                         |   |
| <b>DNMT3A</b>  | DNA (cytosine-5-)-methyltransferase 3 alpha                                                                                                 | √ |
| <b>DNTTIP1</b> | Deoxynucleotidyltransferase, terminal, interacting protein 1 [Source:HGNC Symbol;Acc:16160]                                                 |   |
| <b>DNTTIP2</b> | Deoxynucleotidyltransferase, terminal, interacting protein 2 [Source:HGNC Symbol;Acc:24013]                                                 |   |
| <b>DOCK1</b>   | Dedicator of cytokinesis 1 [Source:HGNC Symbol;Acc:2987]                                                                                    |   |
| <b>DOCK10</b>  | Dedicator of cytokinesis 10 [Source:HGNC Symbol;Acc:23479]                                                                                  |   |
| <b>DOCK2</b>   | Dedicator of cytokinesis 2 [Source:HGNC Symbol;Acc:2988]                                                                                    |   |
| <b>DOCK4</b>   | Dedicator of cytokinesis 4 [Source:HGNC Symbol;Acc:19192]                                                                                   |   |
| <b>DOCK6</b>   | Dedicator of cytokinesis 6 [Source:HGNC Symbol;Acc:19189]                                                                                   |   |
| <b>DOCK7</b>   | Dedicator of cytokinesis 7 [Source:HGNC Symbol;Acc:19190]                                                                                   |   |
| <b>DOCK8</b>   | Dedicator of cytokinesis 8 [Source:HGNC Symbol;Acc:19191]                                                                                   |   |
| <b>DOCK9</b>   | Dedicator of cytokinesis 9 [Source:HGNC Symbol;Acc:14132]                                                                                   |   |
| <b>DOK1</b>    | Docking protein 1, 62kda (downstream of tyrosine kinase 1) [Source:HGNC Symbol;Acc:2990]                                                    |   |
| <b>DOK5</b>    | Docking protein 5 [Source:HGNC Symbol;Acc:16173]                                                                                            |   |
| <b>DOLK</b>    | Dolichol kinase [Source:HGNC Symbol;Acc:23406]                                                                                              |   |
| <b>DOPEY1</b>  | Dopey family member 1 [Source:HGNC Symbol;Acc:21194]                                                                                        |   |
| <b>DOT1L</b>   | DOT1-like, histone H3 methyltransferase ( <i>S. Cerevisiae</i> ) [Source:HGNC Symbol;Acc:24948]                                             |   |
| <b>DPAGT1</b>  | Dolichyl-phosphate (UDP-N-acetylglucosamine) N-acetylglucosaminophosphotransferase 1 (glcnac-1-P transferase) [Source:HGNC Symbol;Acc:2995] |   |
| <b>DPEP1</b>   | Dipeptidase 1 (renal) [Source:HGNC Symbol;Acc:3002]                                                                                         |   |
| <b>DPEP2</b>   | Dipeptidase 2 [Source:HGNC Symbol;Acc:23028]                                                                                                |   |
| <b>DPEP3</b>   | Dipeptidase 3 [Source:HGNC Symbol;Acc:23029]                                                                                                |   |
| <b>DPH1</b>    | DPH1 homolog ( <i>S. Cerevisiae</i> ) [Source:HGNC Symbol;Acc:3003]                                                                         |   |
| <b>DPH2</b>    | DPH2 homolog ( <i>S. Cerevisiae</i> ) [Source:HGNC Symbol;Acc:3004]                                                                         |   |

|                |                                                                                                          |  |
|----------------|----------------------------------------------------------------------------------------------------------|--|
| <b>DPH3</b>    | DPH3, KTI11 homolog ( <i>S. Cerevisiae</i> ) [Source:HGNC Symbol;Acc:27717]                              |  |
| <b>DPP10</b>   | Dipeptidyl-peptidase 10 (non-functional) [Source:HGNC Symbol;Acc:20823]                                  |  |
| <b>DPP6</b>    | Dipeptidyl-peptidase 6 [Source:HGNC Symbol;Acc:3010]                                                     |  |
| <b>DPP8</b>    | Dipeptidyl-peptidase 8 [Source:HGNC Symbol;Acc:16490]                                                    |  |
| <b>DPY19L1</b> | Dpy-19-like 1 ( <i>C. Elegans</i> ) [Source:HGNC Symbol;Acc:22205]                                       |  |
| <b>DPY19L4</b> | Dpy-19-like 4 ( <i>C. Elegans</i> ) [Source:HGNC Symbol;Acc:27829]                                       |  |
| <b>DPYD</b>    | Dihydropyrimidine dehydrogenase [Source:HGNC Symbol;Acc:3012]                                            |  |
| <b>DPYSL3</b>  | Dihydropyrimidinase-like 3 [Source:HGNC Symbol;Acc:3015]                                                 |  |
| <b>DPYSL4</b>  | Dihydropyrimidinase-like 4 [Source:HGNC Symbol;Acc:3016]                                                 |  |
| <b>DQX1</b>    | DEAQ box RNA-dependent atpase 1 [Source:HGNC Symbol;Acc:20410]                                           |  |
| <b>DR1</b>     | Down-regulator of transcription 1, TBP-binding (negative cofactor 2) [Source:HGNC Symbol;Acc:3017]       |  |
| <b>DRAM1</b>   | DNA-damage regulated autophagy modulator 1 [Source:HGNC Symbol;Acc:25645]                                |  |
| <b>DRAM2</b>   | DNA-damage regulated autophagy modulator 2 [Source:HGNC Symbol;Acc:28769]                                |  |
| <b>DRGX</b>    | Dorsal root ganglia homeobox [Source:HGNC Symbol;Acc:21536]                                              |  |
| <b>DROSHA</b>  | Drosha, ribonuclease type III [Source:HGNC Symbol;Acc:17904]                                             |  |
| <b>DRP2</b>    | Dystrophin related protein 2 [Source:HGNC Symbol;Acc:3032]                                               |  |
| <b>DSCAM</b>   | Down syndrome cell adhesion molecule [Source:HGNC Symbol;Acc:3039]                                       |  |
| <b>DSCC1</b>   | Defective in sister chromatid cohesion 1 homolog ( <i>S. Cerevisiae</i> ) [Source:HGNC Symbol;Acc:24453] |  |
| <b>DSCR3</b>   | Down syndrome critical region gene 3 [Source:HGNC Symbol;Acc:3044]                                       |  |
| <b>DSEL</b>    | Dermatan sulfate epimerase-like [Source:HGNC Symbol;Acc:18144]                                           |  |
| <b>DSG1</b>    | Desmoglein 1 [Source:HGNC Symbol;Acc:3048]                                                               |  |
| <b>DSG2</b>    | Desmoglein 2 [Source:HGNC Symbol;Acc:3049]                                                               |  |
| <b>DSG4</b>    | Desmoglein 4 [Source:HGNC Symbol;Acc:21307]                                                              |  |
| <b>DST</b>     | Dystonin [Source:HGNC Symbol;Acc:1090]                                                                   |  |
| <b>DSTYK</b>   | Dual serine/threonine and tyrosine protein kinase [Source:HGNC Symbol;Acc:29043]                         |  |
| <b>DTHD1</b>   | Death domain containing 1 [Source:HGNC Symbol;Acc:37261]                                                 |  |
| <b>DTL</b>     | Denticleless homolog ( <i>Drosophila</i> ) [Source:HGNC Symbol;Acc:30288]                                |  |

|                 |                                                                                                  |  |
|-----------------|--------------------------------------------------------------------------------------------------|--|
| <b>DTNA</b>     | Dystrobrevin, alpha [Source:HGNC Symbol;Acc:3057]                                                |  |
| <b>DTX3L</b>    | Deltex 3-like (Drosophila) [Source:HGNC Symbol;Acc:30323]                                        |  |
| <b>DTX4</b>     | Deltex homolog 4 (Drosophila) [Source:HGNC Symbol;Acc:29151]                                     |  |
| <b>DUOXA1</b>   | Dual oxidase maturation factor 1 [Source:HGNC Symbol;Acc:26507]                                  |  |
| <b>DUOXA2</b>   | Dual oxidase maturation factor 2 [Source:HGNC Symbol;Acc:32698]                                  |  |
| <b>DUSP12</b>   | Dual specificity phosphatase 12 [Source:HGNC Symbol;Acc:3067]                                    |  |
| <b>DUSP27</b>   | Dual specificity phosphatase 27 (putative) [Source:HGNC Symbol;Acc:25034]                        |  |
| <b>DUSP28</b>   | Dual specificity phosphatase 28 [Source:HGNC Symbol;Acc:33237]                                   |  |
| <b>DUSP5</b>    | Dual specificity phosphatase 5 [Source:HGNC Symbol;Acc:3071]                                     |  |
| <b>DUSP7</b>    | Dual specificity phosphatase 7 [Source:HGNC Symbol;Acc:3073]                                     |  |
| <b>DVL1</b>     | Dishevelled, dsh homolog 1 (Drosophila) [Source:HGNC Symbol;Acc:3084]                            |  |
| <b>DYNC1H1</b>  | Dynein, cytoplasmic 1, heavy chain 1 [Source:HGNC Symbol;Acc:2961]                               |  |
| <b>DYNC1LI2</b> | Dynein, cytoplasmic 1, light intermediate chain 2 [Source:HGNC Symbol;Acc:2966]                  |  |
| <b>DYNC2H1</b>  | Dynein, cytoplasmic 2, heavy chain 1 [Source:HGNC Symbol;Acc:2962]                               |  |
| <b>DYSF</b>     | Dysferlin, limb girdle muscular dystrophy 2B (autosomal recessive) [Source:HGNC Symbol;Acc:3097] |  |
| <b>DYX1C1</b>   | Dyslexia susceptibility 1 candidate 1 [Source:HGNC Symbol;Acc:21493]                             |  |
| <b>DZIP1</b>    | DAZ interacting protein 1 [Source:HGNC Symbol;Acc:20908]                                         |  |
| <b>DZIP3</b>    | DAZ interacting protein 3, zinc finger [Source:HGNC Symbol;Acc:30938]                            |  |
| <b>E2F4</b>     | E2F transcription factor 4, p107/p130-binding [Source:HGNC Symbol;Acc:3118]                      |  |
| <b>E2F5</b>     | E2F transcription factor 5, p130-binding [Source:HGNC Symbol;Acc:3119]                           |  |
| <b>EARS2</b>    | Glutamyl-trna synthetase 2, mitochondrial (putative) [Source:HGNC Symbol;Acc:29419]              |  |
| <b>EBF2</b>     | Early B-cell factor 2 [Source:HGNC Symbol;Acc:19090]                                             |  |
| <b>EBPL</b>     | Emopamil binding protein-like [Source:HGNC Symbol;Acc:18061]                                     |  |
| <b>ECE2</b>     | Endothelin converting enzyme 2 [Source:HGNC Symbol;Acc:13275]                                    |  |
| <b>ECHDC1</b>   | Enoyl coa hydratase domain containing 1 [Source:HGNC Symbol;Acc:21489]                           |  |
| <b>ECHDC2</b>   | Enoyl coa hydratase domain containing 2 [Source:HGNC Symbol;Acc:23408]                           |  |

|                |                                                                                                   |   |
|----------------|---------------------------------------------------------------------------------------------------|---|
| <b>ECM2</b>    | Extracellular matrix protein 2, female organ and adipocyte specific [Source:HGNC Symbol;Acc:3154] |   |
| <b>ECSIT</b>   | ECSIT homolog (Drosophila) [Source:HGNC Symbol;Acc:29548]                                         |   |
| <b>ECT2L</b>   | Epithelial cell transforming sequence 2 oncogene-like                                             | √ |
| <b>EDAR</b>    | Ectodysplasin A receptor [Source:HGNC Symbol;Acc:2895]                                            |   |
| <b>EDARADD</b> | EDAR-associated death domain [Source:HGNC Symbol;Acc:14341]                                       |   |
| <b>EDC4</b>    | Enhancer of mrna decapping 4 [Source:HGNC Symbol;Acc:17157]                                       |   |
| <b>EDEM2</b>   | ER degradation enhancer, mannosidase alpha-like 2 [Source:HGNC Symbol;Acc:15877]                  |   |
| <b>EDEM3</b>   | ER degradation enhancer, mannosidase alpha-like 3 [Source:HGNC Symbol;Acc:16787]                  |   |
| <b>EDN3</b>    | Endothelin 3 [Source:HGNC Symbol;Acc:3178]                                                        |   |
| <b>EDNRA</b>   | Endothelin receptor type A [Source:HGNC Symbol;Acc:3179]                                          |   |
| <b>EDNRB</b>   | Endothelin receptor type B [Source:HGNC Symbol;Acc:3180]                                          |   |
| <b>EEA1</b>    | Early endosome antigen 1 [Source:HGNC Symbol;Acc:3185]                                            |   |
| <b>EEF1A1</b>  | Eukaryotic translation elongation factor 1 alpha 1 [Source:HGNC Symbol;Acc:3189]                  |   |
| <b>EEF1A2</b>  | Eukaryotic translation elongation factor 1 alpha 2 [Source:HGNC Symbol;Acc:3192]                  |   |
| <b>EEF1G</b>   | Eukaryotic translation elongation factor 1 gamma [Source:HGNC Symbol;Acc:3213]                    |   |
| <b>EEF2</b>    | Eukaryotic translation elongation factor 2 [Source:HGNC Symbol;Acc:3214]                          |   |
| <b>EEPD1</b>   | Endonuclease/exonuclease/phosphatase family domain containing 1 [Source:HGNC Symbol;Acc:22223]    |   |
| <b>EFCAB2</b>  | EF-hand calcium binding domain 2 [Source:HGNC Symbol;Acc:28166]                                   |   |
| <b>EFCAB3</b>  | EF-hand calcium binding domain 3 [Source:HGNC Symbol;Acc:26379]                                   |   |
| <b>EFCAB4B</b> | EF-hand calcium binding domain 4B [Source:HGNC Symbol;Acc:28657]                                  |   |
| <b>EFCAB5</b>  | EF-hand calcium binding domain 5 [Source:HGNC Symbol;Acc:24801]                                   |   |
| <b>EFCAB6</b>  | EF-hand calcium binding domain 6 [Source:HGNC Symbol;Acc:24204]                                   |   |
| <b>EFCAB8</b>  | EF-hand calcium binding domain 8 [Source:HGNC Symbol;Acc:34532]                                   |   |
| <b>EFEMP1</b>  | EGF containing fibulin-like extracellular matrix protein 1 [Source:HGNC Symbol;Acc:3218]          |   |

|                |                                                                                                   |   |
|----------------|---------------------------------------------------------------------------------------------------|---|
| <b>EFEMP2</b>  | EGF containing fibulin-like extracellular matrix protein 2 [Source:HGNC Symbol;Acc:3219]          |   |
| <b>EFHA1</b>   | EF-hand domain family, member A1 [Source:HGNC Symbol;Acc:31830]                                   |   |
| <b>EFHB</b>    | EF-hand domain family, member B [Source:HGNC Symbol;Acc:26330]                                    |   |
| <b>EFNA5</b>   | Ephrin-A5 [Source:HGNC Symbol;Acc:3225]                                                           |   |
| <b>EFR3B</b>   | EFR3 homolog B ( <i>S. Cerevisiae</i> ) [Source:HGNC Symbol;Acc:29155]                            |   |
| <b>EFTUD1</b>  | Elongation factor Tu GTP binding domain containing 1 [Source:HGNC Symbol;Acc:25789]               |   |
| <b>EGF</b>     | Epidermal growth factor [Source:HGNC Symbol;Acc:3229]                                             |   |
| <b>EGFL7</b>   | EGF-like-domain, multiple 7 [Source:HGNC Symbol;Acc:20594]                                        |   |
| <b>EGFLAM</b>  | EGF-like, fibronectin type III and laminin G domains [Source:HGNC Symbol;Acc:26810]               |   |
| <b>EGFR</b>    | Epidermal growth factor receptor                                                                  | √ |
| <b>EGLN1</b>   | Egl nine homolog 1 ( <i>C. Elegans</i> ) [Source:HGNC Symbol;Acc:1232]                            |   |
| <b>EGLN2</b>   | Egl nine homolog 2 ( <i>C. Elegans</i> ) [Source:HGNC Symbol;Acc:14660]                           |   |
| <b>EGR1</b>    | Early growth response 1 [Source:HGNC Symbol;Acc:3238]                                             |   |
| <b>EGR3</b>    | Early growth response 3 [Source:HGNC Symbol;Acc:3240]                                             |   |
| <b>EGR4</b>    | Early growth response 4 [Source:HGNC Symbol;Acc:3241]                                             |   |
| <b>EHD1</b>    | EH-domain containing 1 [Source:HGNC Symbol;Acc:3242]                                              |   |
| <b>EHD4</b>    | EH-domain containing 4 [Source:HGNC Symbol;Acc:3245]                                              |   |
| <b>EHF</b>     | Ets homologous factor [Source:HGNC Symbol;Acc:3246]                                               |   |
| <b>EHHADH</b>  | Enoyl-coa, hydratase/3-hydroxyacyl coa dehydrogenase [Source:HGNC Symbol;Acc:3247]                |   |
| <b>EHMT2</b>   | Euchromatic histone-lysine N-methyltransferase 2 [Source:HGNC Symbol;Acc:14129]                   |   |
| <b>EI24</b>    | Etoposide induced 2.4 mrna [Source:HGNC Symbol;Acc:13276]                                         |   |
| <b>EIF2AK1</b> | Eukaryotic translation initiation factor 2-alpha kinase 1 [Source:HGNC Symbol;Acc:24921]          |   |
| <b>EIF2B1</b>  | Eukaryotic translation initiation factor 2B, subunit 1 alpha, 26kda [Source:HGNC Symbol;Acc:3257] |   |
| <b>EIF2C1</b>  | Eukaryotic translation initiation factor 2C, 1 [Source:HGNC Symbol;Acc:3262]                      |   |



|               |                                                                                                  |  |
|---------------|--------------------------------------------------------------------------------------------------|--|
| <b>EIF2C3</b> | Eukaryotic translation initiation factor 2C, 3 [Source:HGNC Symbol;Acc:18421]                    |  |
| <b>EIF2C4</b> | Eukaryotic translation initiation factor 2C, 4 [Source:HGNC Symbol;Acc:18424]                    |  |
| <b>EIF2S1</b> | Eukaryotic translation initiation factor 2, subunit 1 alpha, 35kda [Source:HGNC Symbol;Acc:3265] |  |
| <b>EIF2S3</b> | Eukaryotic translation initiation factor 2, subunit 3 gamma, 52kda [Source:HGNC Symbol;Acc:3267] |  |
| <b>EIF3E</b>  | Eukaryotic translation initiation factor 3, subunit E [Source:HGNC Symbol;Acc:3277]              |  |
| <b>EIF3F</b>  | Eukaryotic translation initiation factor 3, subunit F [Source:HGNC Symbol;Acc:3275]              |  |
| <b>EIF3H</b>  | Eukaryotic translation initiation factor 3, subunit H [Source:HGNC Symbol;Acc:3273]              |  |
| <b>EIF3I</b>  | Eukaryotic translation initiation factor 3, subunit I [Source:HGNC Symbol;Acc:3272]              |  |
| <b>EIF3K</b>  | Eukaryotic translation initiation factor 3, subunit K [Source:HGNC Symbol;Acc:24656]             |  |
| <b>EIF3L</b>  | Eukaryotic translation initiation factor 3, subunit L [Source:HGNC Symbol;Acc:18138]             |  |
| <b>EIF4A3</b> | Eukaryotic translation initiation factor 4A3 [Source:HGNC Symbol;Acc:18683]                      |  |
| <b>EIF4B</b>  | Eukaryotic translation initiation factor 4B [Source:HGNC Symbol;Acc:3285]                        |  |
| <b>EIF4E</b>  | Eukaryotic translation initiation factor 4E [Source:HGNC Symbol;Acc:3287]                        |  |
| <b>EIF4E2</b> | Eukaryotic translation initiation factor 4E family member 2 [Source:HGNC Symbol;Acc:3293]        |  |
| <b>EIF4E3</b> | Eukaryotic translation initiation factor 4E family member 3 [Source:HGNC Symbol;Acc:31837]       |  |
| <b>EIF4G1</b> | Eukaryotic translation initiation factor 4 gamma, 1 [Source:HGNC Symbol;Acc:3296]                |  |
| <b>EIF4G3</b> | Eukaryotic translation initiation factor 4 gamma, 3 [Source:HGNC Symbol;Acc:3298]                |  |

|               |                                                                                                                               |   |
|---------------|-------------------------------------------------------------------------------------------------------------------------------|---|
| <b>EIF4H</b>  | Eukaryotic translation initiation factor 4H [Source:HGNC Symbol;Acc:12741]                                                    |   |
| <b>EIF5</b>   | Eukaryotic translation initiation factor 5 [Source:HGNC Symbol;Acc:3299]                                                      |   |
| <b>EIF5A2</b> | Eukaryotic translation initiation factor 5A2 [Source:HGNC Symbol;Acc:3301]                                                    |   |
| <b>EIF6</b>   | Eukaryotic translation initiation factor 6 [Source:HGNC Symbol;Acc:6159]                                                      |   |
| <b>ELANE</b>  | Elastase, neutrophil expressed [Source:HGNC Symbol;Acc:3309]                                                                  |   |
| <b>ELAVL1</b> | ELAV (embryonic lethal, abnormal vision, Drosophila)-like 1 (Hu antigen R) [Source:HGNC Symbol;Acc:3312]                      |   |
| <b>ELAVL2</b> | ELAV (embryonic lethal, abnormal vision, Drosophila)-like 2 (Hu antigen B) [Source:HGNC Symbol;Acc:3313]                      |   |
| <b>ELAVL4</b> | ELAV (embryonic lethal, abnormal vision, Drosophila)-like 4 (Hu antigen D) [Source:HGNC Symbol;Acc:3315]                      |   |
| <b>ELF1</b>   | E74-like factor 1 (ets domain transcription factor) [Source:HGNC Symbol;Acc:3316]                                             |   |
| <b>ELF3</b>   | E74-like factor 3 (ets domain transcription factor, epithelial-specific ) [Source:HGNC Symbol;Acc:3318]                       |   |
| <b>ELF4</b>   | E74-like factor 4 (ets domain transcription factor)                                                                           | √ |
| <b>ELF5</b>   | E74-like factor 5 (ets domain transcription factor) [Source:HGNC Symbol;Acc:3320]                                             |   |
| <b>ELL</b>    | Elongation factor RNA polymerase II                                                                                           | √ |
| <b>ELL2</b>   | Elongation factor, RNA polymerase II, 2 [Source:HGNC Symbol;Acc:17064]                                                        |   |
| <b>ELMO2</b>  | Engulfment and cell motility 2 [Source:HGNC Symbol;Acc:17233]                                                                 |   |
| <b>ELMO3</b>  | Engulfment and cell motility 3 [Source:HGNC Symbol;Acc:17289]                                                                 |   |
| <b>ELOF1</b>  | Elongation factor 1 homolog (S. Cerevisiae) [Source:HGNC Symbol;Acc:28691]                                                    |   |
| <b>ELOVL3</b> | Elongation of very long chain fatty acids (FEN1/Elo2, SUR4/Elo3, yeast)-like 3 [Source:HGNC Symbol;Acc:18047]                 |   |
| <b>ELOVL4</b> | Elongation of very long chain fatty acids (FEN1/Elo2, SUR4/Elo3, yeast)-like 4 [Source:HGNC Symbol;Acc:14415]                 |   |
| <b>ELOVL6</b> | ELOVL family member 6, elongation of long chain fatty acids (FEN1/Elo2, SUR4/Elo3-like, yeast) [Source:HGNC Symbol;Acc:15829] |   |

|                |                                                                                                |  |
|----------------|------------------------------------------------------------------------------------------------|--|
| <b>ELP4</b>    | Elongation protein 4 homolog ( <i>S. Cerevisiae</i> ) [Source:HGNC Symbol;Acc:1171]            |  |
| <b>ELTD1</b>   | EGF, latrophilin and seven transmembrane domain containing 1 [Source:HGNC Symbol;Acc:20822]    |  |
| <b>EMCN</b>    | Endomucin [Source:HGNC Symbol;Acc:16041]                                                       |  |
| <b>EMID2</b>   | EMI domain containing 2 [Source:HGNC Symbol;Acc:18038]                                         |  |
| <b>EMILIN1</b> | Elastin microfibril interfacier 1 [Source:HGNC Symbol;Acc:19880]                               |  |
| <b>EML3</b>    | Echinoderm microtubule associated protein like 3 [Source:HGNC Symbol;Acc:26666]                |  |
| <b>EML5</b>    | Echinoderm microtubule associated protein like 5 [Source:HGNC Symbol;Acc:18197]                |  |
| <b>EML6</b>    | Echinoderm microtubule associated protein like 6 [Source:HGNC Symbol;Acc:35412]                |  |
| <b>EMP2</b>    | Epithelial membrane protein 2 [Source:HGNC Symbol;Acc:3334]                                    |  |
| <b>EMR1</b>    | Egf-like module containing, mucin-like, hormone receptor-like 1 [Source:HGNC Symbol;Acc:3336]  |  |
| <b>EMR2</b>    | Egf-like module containing, mucin-like, hormone receptor-like 2 [Source:HGNC Symbol;Acc:3337]  |  |
| <b>EMR3</b>    | Egf-like module containing, mucin-like, hormone receptor-like 3 [Source:HGNC Symbol;Acc:23647] |  |
| <b>ENDOD1</b>  | Endonuclease domain containing 1 [Source:HGNC Symbol;Acc:29129]                                |  |
| <b>ENG</b>     | Endoglin [Source:HGNC Symbol;Acc:3349]                                                         |  |
| <b>ENGASE</b>  | Endo-beta-N-acetylglucosaminidase [Source:HGNC Symbol;Acc:24622]                               |  |
| <b>ENO2</b>    | Enolase 2 (gamma, neuronal) [Source:HGNC Symbol;Acc:3353]                                      |  |
| <b>ENOX2</b>   | Ecto-NOX disulfide-thiol exchanger 2 [Source:HGNC Symbol;Acc:2259]                             |  |
| <b>ENPEP</b>   | Glutamyl aminopeptidase (aminopeptidase A) [Source:HGNC Symbol;Acc:3355]                       |  |
| <b>ENPP1</b>   | Ectonucleotide pyrophosphatase/phosphodiesterase 1 [Source:HGNC Symbol;Acc:3356]               |  |
| <b>ENPP3</b>   | Ectonucleotide pyrophosphatase/phosphodiesterase 3 [Source:HGNC Symbol;Acc:3358]               |  |
| <b>ENPP4</b>   | Ectonucleotide pyrophosphatase/phosphodiesterase 4 (putative) [Source:HGNC Symbol;Acc:3359]    |  |

|                 |                                                                                                   |  |
|-----------------|---------------------------------------------------------------------------------------------------|--|
| <b>ENPP5</b>    | Ectonucleotide pyrophosphatase/phosphodiesterase 5 (putative) [Source:HGNC Symbol;Acc:13717]      |  |
| <b>ENPP6</b>    | Ectonucleotide pyrophosphatase/phosphodiesterase 6 [Source:HGNC Symbol;Acc:23409]                 |  |
| <b>ENTPD1</b>   | Ectonucleoside triphosphate diphosphohydrolase 1 [Source:HGNC Symbol;Acc:3363]                    |  |
| <b>ENTPD6</b>   | Ectonucleoside triphosphate diphosphohydrolase 6 (putative) [Source:HGNC Symbol;Acc:3368]         |  |
| <b>ENTPD8</b>   | Ectonucleoside triphosphate diphosphohydrolase 8 [Source:HGNC Symbol;Acc:24860]                   |  |
| <b>EOMES</b>    | Eomesodermin [Source:HGNC Symbol;Acc:3372]                                                        |  |
| <b>EP400</b>    | E1A binding protein p400 [Source:HGNC Symbol;Acc:11958]                                           |  |
| <b>EP400NL</b>  | EP400 N-terminal like [Source:HGNC Symbol;Acc:26602]                                              |  |
| <b>EPB41</b>    | Erythrocyte membrane protein band 4.1 (elliptocytosis 1, RH-linked) [Source:HGNC Symbol;Acc:3377] |  |
| <b>EPB41L1</b>  | Erythrocyte membrane protein band 4.1-like 1 [Source:HGNC Symbol;Acc:3378]                        |  |
| <b>EPB41L3</b>  | Erythrocyte membrane protein band 4.1-like 3 [Source:HGNC Symbol;Acc:3380]                        |  |
| <b>EPC1</b>     | Enhancer of polycomb homolog 1 (Drosophila) [Source:HGNC Symbol;Acc:19876]                        |  |
| <b>EPC2</b>     | Enhancer of polycomb homolog 2 (Drosophila) [Source:HGNC Symbol;Acc:24543]                        |  |
| <b>EPCAM</b>    | Epithelial cell adhesion molecule [Source:HGNC Symbol;Acc:11529]                                  |  |
| <b>EPHA1</b>    | EPH receptor A1 [Source:HGNC Symbol;Acc:3385]                                                     |  |
| <b>EPHA6</b>    | EPH receptor A6 [Source:HGNC Symbol;Acc:19296]                                                    |  |
| <b>EPHA7</b>    | EPH receptor A7 [Source:HGNC Symbol;Acc:3390]                                                     |  |
| <b>EPHB1</b>    | EPH receptor B1 [Source:HGNC Symbol;Acc:3392]                                                     |  |
| <b>EPHB3</b>    | EPH receptor B3 [Source:HGNC Symbol;Acc:3394]                                                     |  |
| <b>EPHB6</b>    | EPH receptor B6 [Source:HGNC Symbol;Acc:3396]                                                     |  |
| <b>EPHX1</b>    | Epoxide hydrolase 1, microsomal (xenobiotic) [Source:HGNC Symbol;Acc:3401]                        |  |
| <b>EPM2AIP1</b> | EPM2A (laforin) interacting protein 1 [Source:HGNC Symbol;Acc:19735]                              |  |

|                |                                                                                                                                                               |   |
|----------------|---------------------------------------------------------------------------------------------------------------------------------------------------------------|---|
| <b>EPN2</b>    | Epsin 2 [Source:HGNC Symbol;Acc:18639]                                                                                                                        |   |
| <b>EPN3</b>    | Epsin 3 [Source:HGNC Symbol;Acc:18235]                                                                                                                        |   |
| <b>EPO</b>     | Erythropoietin [Source:HGNC Symbol;Acc:3415]                                                                                                                  |   |
| <b>EPS8</b>    | Epidermal growth factor receptor pathway substrate 8 [Source:HGNC Symbol;Acc:3420]                                                                            |   |
| <b>EPT1</b>    | Ethanolaminephosphotransferase 1 (CDP-ethanolamine-specific) [Source:HGNC Symbol;Acc:29361]                                                                   |   |
| <b>EPX</b>     | Eosinophil peroxidase [Source:HGNC Symbol;Acc:3423]                                                                                                           |   |
| <b>ERAP1</b>   | Endoplasmic reticulum aminopeptidase 1 [Source:HGNC Symbol;Acc:18173]                                                                                         |   |
| <b>ERAP2</b>   | Endoplasmic reticulum aminopeptidase 2 [Source:HGNC Symbol;Acc:29499]                                                                                         |   |
| <b>ERBB2</b>   | V-erb-b2 erythroblastic leukemia viral oncogene homolog 2, neuro/glioblastoma derived oncogene homolog (avian)                                                | √ |
| <b>ERBB2IP</b> | ErbB2 interacting protein [Source:HGNC Symbol;Acc:15842]                                                                                                      |   |
| <b>ERBB4</b>   | V-erb-a erythroblastic leukemia viral oncogene homolog 4 (avian) [Source:HGNC Symbol;Acc:3432]                                                                |   |
| <b>ERC1</b>    | ELKS/RAB6-interacting/CAST family member 1 [Source:HGNC Symbol;Acc:17072]                                                                                     |   |
| <b>ERC2</b>    | ELKS/RAB6-interacting/CAST family member 2 [Source:HGNC Symbol;Acc:31922]                                                                                     |   |
| <b>ERCC1</b>   | Excision repair cross-complementing rodent repair deficiency, complementation group 1 (includes overlapping antisense sequence) [Source:HGNC Symbol;Acc:3433] |   |
| <b>ERCC2</b>   | Excision repair cross-complementing rodent repair deficiency, complementation group 2                                                                         | √ |
| <b>ERCC6</b>   | Excision repair cross-complementing rodent repair deficiency, complementation group 6 [Source:HGNC Symbol;Acc:3438]                                           |   |
| <b>ERGIC2</b>  | ERGIC and golgi 2 [Source:HGNC Symbol;Acc:30208]                                                                                                              |   |
| <b>ERGIC3</b>  | ERGIC and golgi 3 [Source:HGNC Symbol;Acc:15927]                                                                                                              |   |
| <b>ERI1</b>    | Exoribonuclease 1 [Source:HGNC Symbol;Acc:23994]                                                                                                              |   |
| <b>ERIC1</b>   | Glutamate-rich 1 [Source:HGNC Symbol;Acc:27234]                                                                                                               |   |
| <b>ERLIN1</b>  | ER lipid raft associated 1 [Source:HGNC Symbol;Acc:16947]                                                                                                     |   |

|                |                                                                                               |   |
|----------------|-----------------------------------------------------------------------------------------------|---|
| <b>ERLIN2</b>  | ER lipid raft associated 2 [Source:HGNC Symbol;Acc:1356]                                      |   |
| <b>ERMAP</b>   | Erythroblast membrane-associated protein (Scianna blood group) [Source:HGNC Symbol;Acc:15743] |   |
| <b>ERMN</b>    | Ermin, ERM-like protein [Source:HGNC Symbol;Acc:29208]                                        |   |
| <b>ERMP1</b>   | Endoplasmic reticulum metallopeptidase 1 [Source:HGNC Symbol;Acc:23703]                       |   |
| <b>ERO1LB</b>  | ERO1-like beta ( <i>S. Cerevisiae</i> ) [Source:HGNC Symbol;Acc:14355]                        |   |
| <b>ERRFI1</b>  | ERBB receptor feedback inhibitor 1 [Source:HGNC Symbol;Acc:18185]                             |   |
| <b>ESCO2</b>   | Establishment of cohesion 1 homolog 2 ( <i>S. Cerevisiae</i> ) [Source:HGNC Symbol;Acc:27230] |   |
| <b>ESM1</b>    | Endothelial cell-specific molecule 1 [Source:HGNC Symbol;Acc:3466]                            |   |
| <b>ESPNL</b>   | Espin-like [Source:HGNC Symbol;Acc:27937]                                                     |   |
| <b>ESR1</b>    | Estrogen receptor 1 [Source:HGNC Symbol;Acc:3467]                                             |   |
| <b>ESR2</b>    | Estrogen receptor 2 (ER beta) [Source:HGNC Symbol;Acc:3468]                                   |   |
| <b>ESRRA</b>   | Estrogen-related receptor alpha [Source:HGNC Symbol;Acc:3471]                                 |   |
| <b>ESRRB</b>   | Estrogen-related receptor beta [Source:HGNC Symbol;Acc:3473]                                  |   |
| <b>ESYT2</b>   | Extended synaptotagmin-like protein 2 [Source:HGNC Symbol;Acc:22211]                          |   |
| <b>ESYT3</b>   | Extended synaptotagmin-like protein 3 [Source:HGNC Symbol;Acc:24295]                          |   |
| <b>ETV3</b>    | Ets variant 3 [Source:HGNC Symbol;Acc:3492]                                                   |   |
| <b>ETV5</b>    | Ets variant 5                                                                                 | √ |
| <b>EVC</b>     | Ellis van Creveld syndrome [Source:HGNC Symbol;Acc:3497]                                      |   |
| <b>EVC2</b>    | Ellis van Creveld syndrome 2 [Source:HGNC Symbol;Acc:19747]                                   |   |
| <b>EVI5</b>    | Ecotropic viral integration site 5 [Source:HGNC Symbol;Acc:3501]                              |   |
| <b>EVL</b>     | Enah/Vasp-like [Source:HGNC Symbol;Acc:20234]                                                 |   |
| <b>EVX2</b>    | Even-skipped homeobox 2 [Source:HGNC Symbol;Acc:3507]                                         |   |
| <b>EXD1</b>    | Exonuclease 3'-5' domain containing 1 [Source:HGNC Symbol;Acc:28507]                          |   |
| <b>EXO1</b>    | Exonuclease 1 [Source:HGNC Symbol;Acc:3511]                                                   |   |
| <b>EXOC1</b>   | Exocyst complex component 1 [Source:HGNC Symbol;Acc:30380]                                    |   |
| <b>EXOC2</b>   | Exocyst complex component 2 [Source:HGNC Symbol;Acc:24968]                                    |   |
| <b>EXOC3L4</b> | Exocyst complex component 3-like 4 [Source:HGNC Symbol;Acc:20120]                             |   |
| <b>EXOC4</b>   | Exocyst complex component 4 [Source:HGNC Symbol;Acc:30389]                                    |   |
| <b>EXOC6</b>   | Exocyst complex component 6 [Source:HGNC Symbol;Acc:23196]                                    |   |
| <b>EXOC6B</b>  | Exocyst complex component 6B [Source:HGNC Symbol;Acc:17085]                                   |   |

|                |                                                                                                 |   |
|----------------|-------------------------------------------------------------------------------------------------|---|
| <b>EXOC7</b>   | Exocyst complex component 7 [Source:HGNC Symbol;Acc:23214]                                      |   |
| <b>EXOC8</b>   | Exocyst complex component 8 [Source:HGNC Symbol;Acc:24659]                                      |   |
| <b>EXOSC10</b> | Exosome component 10 [Source:HGNC Symbol;Acc:9138]                                              |   |
| <b>EXOSC4</b>  | Exosome component 4 [Source:HGNC Symbol;Acc:18189]                                              |   |
| <b>EXPH5</b>   | Exophilin 5 [Source:HGNC Symbol;Acc:30578]                                                      |   |
| <b>EXT1</b>    | Exostosin 1                                                                                     | √ |
| <b>EXTL2</b>   | Exostoses (multiple)-like 2 [Source:HGNC Symbol;Acc:3516]                                       |   |
| <b>EXTL3</b>   | Exostoses (multiple)-like 3 [Source:HGNC Symbol;Acc:3518]                                       |   |
| <b>EYA2</b>    | Eyes absent homolog 2 (Drosophila) [Source:HGNC Symbol;Acc:3520]                                |   |
| <b>EZH1</b>    | Enhancer of zeste homolog 1 (Drosophila) [Source:HGNC Symbol;Acc:3526]                          |   |
| <b>EZH2</b>    | Enhancer of zeste homolog 2 (Drosophila)                                                        | √ |
| <b>F11</b>     | Coagulation factor XI [Source:HGNC Symbol;Acc:3529]                                             |   |
| <b>F11R</b>    | F11 receptor [Source:HGNC Symbol;Acc:14685]                                                     |   |
| <b>F2R</b>     | Coagulation factor II (thrombin) receptor [Source:HGNC Symbol;Acc:3537]                         |   |
| <b>F3</b>      | Coagulation factor III (thromboplastin, tissue factor) [Source:HGNC Symbol;Acc:3541]            |   |
| <b>F5</b>      | Coagulation factor V (proaccelerin, labile factor) [Source:HGNC Symbol;Acc:3542]                |   |
| <b>F7</b>      | Coagulation factor VII (serum prothrombin conversion accelerator) [Source:HGNC Symbol;Acc:3544] |   |
| <b>F8</b>      | Coagulation factor VIII, procoagulant component [Source:HGNC Symbol;Acc:3546]                   |   |
| <b>FABP9</b>   | Fatty acid binding protein 9, testis [Source:HGNC Symbol;Acc:3563]                              |   |
| <b>FADD</b>    | Fas (TNFRSF6)-associated via death domain [Source:HGNC Symbol;Acc:3573]                         |   |
| <b>FAF1</b>    | Fas (TNFRSF6) associated factor 1 [Source:HGNC Symbol;Acc:3578]                                 |   |
| <b>FAH</b>     | Fumarylacetoacetate hydrolase (fumarylacetoacetase) [Source:HGNC Symbol;Acc:3579]               |   |
| <b>FAHD2A</b>  | Fumarylacetoacetate hydrolase domain containing 2A [Source:HGNC Symbol;Acc:24252]               |   |
| <b>FAIM</b>    | Fas apoptotic inhibitory molecule [Source:HGNC Symbol;Acc:18703]                                |   |
| <b>FAIM2</b>   | Fas apoptotic inhibitory molecule 2 [Source:HGNC Symbol;Acc:17067]                              |   |

|                 |                                                                               |  |
|-----------------|-------------------------------------------------------------------------------|--|
| <b>FAM3</b>     | Fas apoptotic inhibitory molecule 3 [Source:HGNC Symbol;Acc:14315]            |  |
| <b>FAM101A</b>  | Family with sequence similarity 101, member A [Source:HGNC Symbol;Acc:27051]  |  |
| <b>FAM101B</b>  | Family with sequence similarity 101, member B [Source:HGNC Symbol;Acc:28705]  |  |
| <b>FAM102A</b>  | Family with sequence similarity 102, member A [Source:HGNC Symbol;Acc:31419]  |  |
| <b>FAM102B</b>  | Family with sequence similarity 102, member B [Source:HGNC Symbol;Acc:27637]  |  |
| <b>FAM103A1</b> | Family with sequence similarity 103, member A1 [Source:HGNC Symbol;Acc:31022] |  |
| <b>FAM105B</b>  | Family with sequence similarity 105, member B [Source:HGNC Symbol;Acc:25118]  |  |
| <b>FAM106A</b>  | Family with sequence similarity 106, member A [Source:HGNC Symbol;Acc:25682]  |  |
| <b>FAM106B</b>  | Family with sequence similarity 106, member B [Source:HGNC Symbol;Acc:32450]  |  |
| <b>FAM109A</b>  | Family with sequence similarity 109, member A [Source:HGNC Symbol;Acc:26509]  |  |
| <b>FAM110B</b>  | Family with sequence similarity 110, member B [Source:HGNC Symbol;Acc:28587]  |  |
| <b>FAM111B</b>  | Family with sequence similarity 111, member B [Source:HGNC Symbol;Acc:24200]  |  |
| <b>FAM113A</b>  | Family with sequence similarity 113, member A [Source:HGNC Symbol;Acc:16212]  |  |
| <b>FAM114A2</b> | Family with sequence similarity 114, member A2 [Source:HGNC Symbol;Acc:1333]  |  |
| <b>FAM115A</b>  | Family with sequence similarity 115, member A [Source:HGNC Symbol;Acc:22201]  |  |
| <b>FAM115C</b>  | Family with sequence similarity 115, member C [Source:HGNC Symbol;Acc:26878]  |  |
| <b>FAM116B</b>  | Family with sequence similarity 116, member B [Source:HGNC Symbol;Acc:32690]  |  |



|                |                                                                              |  |
|----------------|------------------------------------------------------------------------------|--|
| <b>FAM118A</b> | Family with sequence similarity 118, member A [Source:HGNC Symbol;Acc:1313]  |  |
| <b>FAM119B</b> | Family with sequence similarity 119, member B [Source:HGNC Symbol;Acc:24936] |  |
| <b>FAM120C</b> | Family with sequence similarity 120C [Source:HGNC Symbol;Acc:16949]          |  |
| <b>FAM123C</b> | Family with sequence similarity 123C [Source:HGNC Symbol;Acc:26771]          |  |
| <b>FAM124B</b> | Family with sequence similarity 124B [Source:HGNC Symbol;Acc:26224]          |  |
| <b>FAM125B</b> | Family with sequence similarity 125, member B [Source:HGNC Symbol;Acc:23368] |  |
| <b>FAM126A</b> | Family with sequence similarity 126, member A [Source:HGNC Symbol;Acc:24587] |  |
| <b>FAM127C</b> | Family with sequence similarity 127, member C [Source:HGNC Symbol;Acc:33156] |  |
| <b>FAM129B</b> | Family with sequence similarity 129, member B [Source:HGNC Symbol;Acc:25282] |  |
| <b>FAM131A</b> | Family with sequence similarity 131, member A [Source:HGNC Symbol;Acc:28308] |  |
| <b>FAM134A</b> | Family with sequence similarity 134, member A [Source:HGNC Symbol;Acc:28450] |  |
| <b>FAM134C</b> | Family with sequence similarity 134, member C [Source:HGNC Symbol;Acc:27258] |  |
| <b>FAM135A</b> | Family with sequence similarity 135, member A [Source:HGNC Symbol;Acc:21084] |  |
| <b>FAM135B</b> | Family with sequence similarity 135, member B [Source:HGNC Symbol;Acc:28029] |  |
| <b>FAM136A</b> | Family with sequence similarity 136, member A [Source:HGNC Symbol;Acc:25911] |  |
| <b>FAM13A</b>  | Family with sequence similarity 13, member A [Source:HGNC Symbol;Acc:19367]  |  |
| <b>FAM13C</b>  | Family with sequence similarity 13, member C [Source:HGNC Symbol;Acc:19371]  |  |
| <b>FAM149A</b> | Family with sequence similarity 149, member A [Source:HGNC Symbol;Acc:24527] |  |

|                 |                                                                               |  |
|-----------------|-------------------------------------------------------------------------------|--|
| <b>FAM149B1</b> | Family with sequence similarity 149, member B1 [Source:HGNC Symbol;Acc:29162] |  |
| <b>FAM150B</b>  | Family with sequence similarity 150, member B [Source:HGNC Symbol;Acc:27683]  |  |
| <b>FAM153A</b>  | Family with sequence similarity 153, member A [Source:HGNC Symbol;Acc:29940]  |  |
| <b>FAM153B</b>  | Family with sequence similarity 153, member B [Source:HGNC Symbol;Acc:27323]  |  |
| <b>FAM153C</b>  | Family with sequence similarity 153, member C [Source:HGNC Symbol;Acc:33936]  |  |
| <b>FAM156B</b>  | Family with sequence similarity 156, member B [Source:HGNC Symbol;Acc:31962]  |  |
| <b>FAM160A1</b> | Family with sequence similarity 160, member A1 [Source:HGNC Symbol;Acc:34237] |  |
| <b>FAM161A</b>  | Family with sequence similarity 161, member A [Source:HGNC Symbol;Acc:25808]  |  |
| <b>FAM168A</b>  | Family with sequence similarity 168, member A [Source:HGNC Symbol;Acc:28999]  |  |
| <b>FAM169B</b>  | Family with sequence similarity 169, member B [Source:HGNC Symbol;Acc:26835]  |  |
| <b>FAM170B</b>  | Family with sequence similarity 170, member B [Source:HGNC Symbol;Acc:19736]  |  |
| <b>FAM177B</b>  | Family with sequence similarity 177, member B [Source:HGNC Symbol;Acc:34395]  |  |
| <b>FAM179A</b>  | Family with sequence similarity 179, member A [Source:HGNC Symbol;Acc:33715]  |  |
| <b>FAM181B</b>  | Family with sequence similarity 181, member B [Source:HGNC Symbol;Acc:28512]  |  |
| <b>FAM182A</b>  | Family with sequence similarity 182, member A [Source:HGNC Symbol;Acc:16222]  |  |
| <b>FAM184A</b>  | Family with sequence similarity 184, member A [Source:HGNC Symbol;Acc:20991]  |  |

|                 |                                                                                                           |  |
|-----------------|-----------------------------------------------------------------------------------------------------------|--|
| <b>FAM186B</b>  | Family with sequence similarity 186, member B [Source:HGNC Symbol;Acc:25296]                              |  |
| <b>FAM189A1</b> | Family with sequence similarity 189, member A1 [Source:HGNC Symbol;Acc:29075]                             |  |
| <b>FAM189B</b>  | Family with sequence similarity 189, member B [Source:HGNC Symbol;Acc:1233]                               |  |
| <b>FAM18B2</b>  | Family with sequence similarity 18, member B2 [Source:HGNC Symbol;Acc:30453]                              |  |
| <b>FAM190A</b>  | Family with sequence similarity 190, member A [Source:HGNC Symbol;Acc:29349]                              |  |
| <b>FAM190B</b>  | Family with sequence similarity 190, member B [Source:HGNC Symbol;Acc:29197]                              |  |
| <b>FAM196A</b>  | Family with sequence similarity 196, member A [Source:HGNC Symbol;Acc:33859]                              |  |
| <b>FAM19A1</b>  | Family with sequence similarity 19 (chemokine (C-C motif)-like), member A1 [Source:HGNC Symbol;Acc:21587] |  |
| <b>FAM19A2</b>  | Family with sequence similarity 19 (chemokine (C-C motif)-like), member A2 [Source:HGNC Symbol;Acc:21589] |  |
| <b>FAM19A3</b>  | Family with sequence similarity 19 (chemokine (C-C motif)-like), member A3 [Source:HGNC Symbol;Acc:21590] |  |
| <b>FAM200A</b>  | Family with sequence similarity 200, member A [Source:HGNC Symbol;Acc:25401]                              |  |
| <b>FAM20A</b>   | Family with sequence similarity 20, member A [Source:HGNC Symbol;Acc:23015]                               |  |
| <b>FAM20C</b>   | Family with sequence similarity 20, member C [Source:HGNC Symbol;Acc:22140]                               |  |
| <b>FAM23A</b>   | Family with sequence similarity 23, member A [Source:HGNC Symbol;Acc:23473]                               |  |
| <b>FAM23B</b>   | Family with sequence similarity 23, member B [Source:HGNC Symbol;Acc:23474]                               |  |
| <b>FAM26E</b>   | Family with sequence similarity 26, member E [Source:HGNC Symbol;Acc:21568]                               |  |

|               |                                                                             |  |
|---------------|-----------------------------------------------------------------------------|--|
| <b>FAM38A</b> | Family with sequence similarity 38, member A [Source:HGNC Symbol;Acc:28993] |  |
| <b>FAM38B</b> | Family with sequence similarity 38, member B [Source:HGNC Symbol;Acc:26270] |  |
| <b>FAM3A</b>  | Family with sequence similarity 3, member A [Source:HGNC Symbol;Acc:13749]  |  |
| <b>FAM3D</b>  | Family with sequence similarity 3, member D [Source:HGNC Symbol;Acc:18665]  |  |
| <b>FAM40A</b> | Family with sequence similarity 40, member A [Source:HGNC Symbol;Acc:25916] |  |
| <b>FAM46A</b> | Family with sequence similarity 46, member A [Source:HGNC Symbol;Acc:18345] |  |
| <b>FAM47A</b> | Family with sequence similarity 47, member A [Source:HGNC Symbol;Acc:29962] |  |
| <b>FAM47C</b> | Family with sequence similarity 47, member C [Source:HGNC Symbol;Acc:25301] |  |
| <b>FAM47E</b> | Family with sequence similarity 47, member E [Source:HGNC Symbol;Acc:34343] |  |
| <b>FAM49B</b> | Family with sequence similarity 49, member B [Source:HGNC Symbol;Acc:25216] |  |
| <b>FAM53A</b> | Family with sequence similarity 53, member A [Source:HGNC Symbol;Acc:31860] |  |
| <b>FAM53B</b> | Family with sequence similarity 53, member B [Source:HGNC Symbol;Acc:28968] |  |
| <b>FAM53C</b> | Family with sequence similarity 53, member C [Source:HGNC Symbol;Acc:1336]  |  |
| <b>FAM55B</b> | Family with sequence similarity 55, member B [Source:HGNC Symbol;Acc:26331] |  |
| <b>FAM55C</b> | Family with sequence similarity 55, member C [Source:HGNC Symbol;Acc:28238] |  |
| <b>FAM55D</b> | Family with sequence similarity 55, member D [Source:HGNC Symbol;Acc:23117] |  |

|                |                                                                              |  |
|----------------|------------------------------------------------------------------------------|--|
| <b>FAM59B</b>  | Family with sequence similarity 59, member B [Source:HGNC Symbol;Acc:27172]  |  |
| <b>FAM5B</b>   | Family with sequence similarity 5, member B [Source:HGNC Symbol;Acc:13746]   |  |
| <b>FAM63A</b>  | Family with sequence similarity 63, member A [Source:HGNC Symbol;Acc:25648]  |  |
| <b>FAM63B</b>  | Family with sequence similarity 63, member B [Source:HGNC Symbol;Acc:26954]  |  |
| <b>FAM65C</b>  | Family with sequence similarity 65, member C [Source:HGNC Symbol;Acc:16168]  |  |
| <b>FAM69B</b>  | Family with sequence similarity 69, member B [Source:HGNC Symbol;Acc:28290]  |  |
| <b>FAM70A</b>  | Family with sequence similarity 70, member A [Source:HGNC Symbol;Acc:26086]  |  |
| <b>FAM70B</b>  | Family with sequence similarity 70, member B [Source:HGNC Symbol;Acc:28297]  |  |
| <b>FAM71B</b>  | Family with sequence similarity 71, member B [Source:HGNC Symbol;Acc:28397]  |  |
| <b>FAM71C</b>  | Family with sequence similarity 71, member C [Source:HGNC Symbol;Acc:28594]  |  |
| <b>FAM71F2</b> | Family with sequence similarity 71, member F2 [Source:HGNC Symbol;Acc:27998] |  |
| <b>FAM72A</b>  | Family with sequence similarity 72, member A [Source:HGNC Symbol;Acc:24044]  |  |
| <b>FAM72B</b>  | Family with sequence similarity 72, member B [Source:HGNC Symbol;Acc:24805]  |  |
| <b>FAM73A</b>  | Family with sequence similarity 73, member A [Source:HGNC Symbol;Acc:24741]  |  |
| <b>FAM73B</b>  | Family with sequence similarity 73, member B [Source:HGNC Symbol;Acc:23621]  |  |
| <b>FAM75A3</b> | Family with sequence similarity 75, member A3 [Source:HGNC Symbol;Acc:32003] |  |

|                |                                                                              |  |
|----------------|------------------------------------------------------------------------------|--|
| <b>FAM75A4</b> | Family with sequence similarity 75, member A4 [Source:HGNC Symbol;Acc:32004] |  |
| <b>FAM75A5</b> | Family with sequence similarity 75, member A5 [Source:HGNC Symbol;Acc:32005] |  |
| <b>FAM75A6</b> | Family with sequence similarity 75, member A6 [Source:HGNC Symbol;Acc:32006] |  |
| <b>FAM75A7</b> | Family with sequence similarity 75, member A7 [Source:HGNC Symbol;Acc:32007] |  |
| <b>FAM76A</b>  | Family with sequence similarity 76, member A [Source:HGNC Symbol;Acc:28530]  |  |
| <b>FAM76B</b>  | Family with sequence similarity 76, member B [Source:HGNC Symbol;Acc:28492]  |  |
| <b>FAM78A</b>  | Family with sequence similarity 78, member A [Source:HGNC Symbol;Acc:25465]  |  |
| <b>FAM78B</b>  | Family with sequence similarity 78, member B [Source:HGNC Symbol;Acc:13495]  |  |
| <b>FAM82B</b>  | Family with sequence similarity 82, member B [Source:HGNC Symbol;Acc:24285]  |  |
| <b>FAM83A</b>  | Family with sequence similarity 83, member A [Source:HGNC Symbol;Acc:28210]  |  |
| <b>FAM83B</b>  | Family with sequence similarity 83, member B [Source:HGNC Symbol;Acc:21357]  |  |
| <b>FAM83E</b>  | Family with sequence similarity 83, member E [Source:HGNC Symbol;Acc:25972]  |  |
| <b>FAM83G</b>  | Family with sequence similarity 83, member G [Source:HGNC Symbol;Acc:32554]  |  |
| <b>FAM83H</b>  | Family with sequence similarity 83, member H [Source:HGNC Symbol;Acc:24797]  |  |
| <b>FAM84A</b>  | Family with sequence similarity 84, member A [Source:HGNC Symbol;Acc:20743]  |  |
| <b>FAM86A</b>  | Family with sequence similarity 86, member A [Source:HGNC Symbol;Acc:32221]  |  |

|                |                                                                                                           |   |
|----------------|-----------------------------------------------------------------------------------------------------------|---|
| <b>FAM86B1</b> | Family with sequence similarity 86, member B1 [Source:HGNC Symbol;Acc:28268]                              |   |
| <b>FAM89A</b>  | Family with sequence similarity 89, member A [Source:HGNC Symbol;Acc:25057]                               |   |
| <b>FAM8A1</b>  | Family with sequence similarity 8, member A1 [Source:HGNC Symbol;Acc:16372]                               |   |
| <b>FAM91A1</b> | Family with sequence similarity 91, member A1 [Source:HGNC Symbol;Acc:26306]                              |   |
| <b>FAM98A</b>  | Family with sequence similarity 98, member A [Source:HGNC Symbol;Acc:24520]                               |   |
| <b>FAN1</b>    | FANCD2/FANCI-associated nuclease 1 [Source:HGNC Symbol;Acc:29170]                                         |   |
| <b>FANCA</b>   | Fanconi anemia, complementation group A                                                                   | √ |
| <b>FANCD2</b>  | Fanconi anemia, complementation group D2                                                                  | √ |
| <b>FANCI</b>   | Fanconi anemia, complementation group I [Source:HGNC Symbol;Acc:25568]                                    |   |
| <b>FANK1</b>   | Fibronectin type III and ankyrin repeat domains 1 [Source:HGNC Symbol;Acc:23527]                          |   |
| <b>FAP</b>     | Fibroblast activation protein, alpha [Source:HGNC Symbol;Acc:3590]                                        |   |
| <b>FARP1</b>   | FERM, rhogef (ARHGEF) and pleckstrin domain protein 1 (chondrocyte-derived) [Source:HGNC Symbol;Acc:3591] |   |
| <b>FARP2</b>   | FERM, rhogef and pleckstrin domain protein 2 [Source:HGNC Symbol;Acc:16460]                               |   |
| <b>FARS2</b>   | Phenylalanyl-trna synthetase 2, mitochondrial [Source:HGNC Symbol;Acc:21062]                              |   |
| <b>FARSA</b>   | Phenylalanyl-trna synthetase, alpha subunit [Source:HGNC Symbol;Acc:3592]                                 |   |
| <b>FARSB</b>   | Phenylalanyl-trna synthetase, beta subunit [Source:HGNC Symbol;Acc:17800]                                 |   |
| <b>FASLG</b>   | Fas ligand (TNF superfamily, member 6) [Source:HGNC Symbol;Acc:11936]                                     |   |
| <b>FASN</b>    | Fatty acid synthase [Source:HGNC Symbol;Acc:3594]                                                         |   |
| <b>FASTKD5</b> | FAST kinase domains 5 [Source:HGNC Symbol;Acc:25790]                                                      |   |

|               |                                                                                                           |   |
|---------------|-----------------------------------------------------------------------------------------------------------|---|
| <b>FAT1</b>   | FAT tumor suppressor homolog 1 (Drosophila) [Source:HGNC Symbol;Acc:3595]                                 |   |
| <b>FAT2</b>   | FAT tumor suppressor homolog 2 (Drosophila) [Source:HGNC Symbol;Acc:3596]                                 |   |
| <b>FAT3</b>   | FAT tumor suppressor homolog 3 (Drosophila) [Source:HGNC Symbol;Acc:23112]                                |   |
| <b>FAT4</b>   | FAT tumor suppressor homolog 4 (Drosophila) [Source:HGNC Symbol;Acc:23109]                                |   |
| <b>FAU</b>    | Finkel-Biskis-Reilly murine sarcoma virus (FBR-musv) ubiquitously expressed [Source:HGNC Symbol;Acc:3597] |   |
| <b>FBLN1</b>  | Fibulin 1 [Source:HGNC Symbol;Acc:3600]                                                                   |   |
| <b>FBLN2</b>  | Fibulin 2 [Source:HGNC Symbol;Acc:3601]                                                                   |   |
| <b>FBLN5</b>  | Fibulin 5 [Source:HGNC Symbol;Acc:3602]                                                                   |   |
| <b>FBN1</b>   | Fibrillin 1 [Source:HGNC Symbol;Acc:3603]                                                                 |   |
| <b>FBN2</b>   | Fibrillin 2 [Source:HGNC Symbol;Acc:3604]                                                                 |   |
| <b>FBN3</b>   | Fibrillin 3 [Source:HGNC Symbol;Acc:18794]                                                                |   |
| <b>FBXL13</b> | F-box and leucine-rich repeat protein 13 [Source:HGNC Symbol;Acc:21658]                                   |   |
| <b>FBXL15</b> | F-box and leucine-rich repeat protein 15 [Source:HGNC Symbol;Acc:28155]                                   |   |
| <b>FBXL17</b> | F-box and leucine-rich repeat protein 17 [Source:HGNC Symbol;Acc:13615]                                   |   |
| <b>FBXL18</b> | F-box and leucine-rich repeat protein 18 [Source:HGNC Symbol;Acc:21874]                                   |   |
| <b>FBXL19</b> | F-box and leucine-rich repeat protein 19 [Source:HGNC Symbol;Acc:25300]                                   |   |
| <b>FBXL20</b> | F-box and leucine-rich repeat protein 20 [Source:HGNC Symbol;Acc:24679]                                   |   |
| <b>FBXL5</b>  | F-box and leucine-rich repeat protein 5 [Source:HGNC Symbol;Acc:13602]                                    |   |
| <b>FBXL7</b>  | F-box and leucine-rich repeat protein 7 [Source:HGNC Symbol;Acc:13604]                                    |   |
| <b>FBXO11</b> | F-box protein 11                                                                                          | √ |
| <b>FBXO17</b> | F-box protein 17 [Source:HGNC Symbol;Acc:18754]                                                           |   |
| <b>FBXO18</b> | F-box protein, helicase, 18 [Source:HGNC Symbol;Acc:13620]                                                |   |



|               |                                                                                     |   |
|---------------|-------------------------------------------------------------------------------------|---|
| <b>FBXO25</b> | F-box protein 25 [Source:HGNC Symbol;Acc:13596]                                     |   |
| <b>FBXO28</b> | F-box protein 28 [Source:HGNC Symbol;Acc:29046]                                     |   |
| <b>FBXO3</b>  | F-box protein 3 [Source:HGNC Symbol;Acc:13582]                                      |   |
| <b>FBXO32</b> | F-box protein 32 [Source:HGNC Symbol;Acc:16731]                                     |   |
| <b>FBXO33</b> | F-box protein 33 [Source:HGNC Symbol;Acc:19833]                                     |   |
| <b>FBXO34</b> | F-box protein 34 [Source:HGNC Symbol;Acc:20201]                                     |   |
| <b>FBXO4</b>  | F-box protein 4 [Source:HGNC Symbol;Acc:13583]                                      |   |
| <b>FBXO40</b> | F-box protein 40 [Source:HGNC Symbol;Acc:29816]                                     |   |
| <b>FBXO42</b> | F-box protein 42 [Source:HGNC Symbol;Acc:29249]                                     |   |
| <b>FBXO44</b> | F-box protein 44 [Source:HGNC Symbol;Acc:24847]                                     |   |
| <b>FBXO5</b>  | F-box protein 5 [Source:HGNC Symbol;Acc:13584]                                      |   |
| <b>FBXO7</b>  | F-box protein 7 [Source:HGNC Symbol;Acc:13586]                                      |   |
| <b>FBXW11</b> | F-box and WD repeat domain containing 11 [Source:HGNC Symbol;Acc:13607]             |   |
| <b>FBXW2</b>  | F-box and WD repeat domain containing 2 [Source:HGNC Symbol;Acc:13608]              |   |
| <b>FBXW7</b>  | F-box and WD repeat domain containing 7                                             | √ |
| <b>FCGBP</b>  | Fc fragment of igg binding protein [Source:HGNC Symbol;Acc:13572]                   |   |
| <b>FCGR1A</b> | Fc fragment of igg, high affinity Ia, receptor (CD64) [Source:HGNC Symbol;Acc:3613] |   |
| <b>FCGR1B</b> | Fc fragment of igg, high affinity Ib, receptor (CD64) [Source:HGNC Symbol;Acc:3614] |   |
| <b>FCGR2A</b> | Fc fragment of igg, low affinity iia, receptor (CD32) [Source:HGNC Symbol;Acc:3616] |   |
| <b>FCHO2</b>  | FCH domain only 2 [Source:HGNC Symbol;Acc:25180]                                    |   |
| <b>FCHSD1</b> | FCH and double SH3 domains 1 [Source:HGNC Symbol;Acc:25463]                         |   |
| <b>FCRL2</b>  | Fc receptor-like 2 [Source:HGNC Symbol;Acc:14875]                                   |   |
| <b>FCRL5</b>  | Fc receptor-like 5 [Source:HGNC Symbol;Acc:18508]                                   |   |
| <b>FDFT1</b>  | Farnesyl-diphosphate farnesyltransferase 1 [Source:HGNC Symbol;Acc:3629]            |   |
| <b>FDX1L</b>  | Ferredoxin 1-like [Source:HGNC Symbol;Acc:30546]                                    |   |
| <b>FDXR</b>   | Ferredoxin reductase [Source:HGNC Symbol;Acc:3642]                                  |   |
| <b>FECH</b>   | Ferrochelatase [Source:HGNC Symbol;Acc:3647]                                        |   |

|                |                                                                                          |   |
|----------------|------------------------------------------------------------------------------------------|---|
| <b>FEM1B</b>   | Fem-1 homolog b (C. Elegans) [Source:HGNC Symbol;Acc:3649]                               |   |
| <b>FEM1C</b>   | Fem-1 homolog c (C. Elegans) [Source:HGNC Symbol;Acc:16933]                              |   |
| <b>FER1L5</b>  | Fer-1-like 5 (C. Elegans) [Source:HGNC Symbol;Acc:19044]                                 |   |
| <b>FERMT2</b>  | Fermitin family member 2 [Source:HGNC Symbol;Acc:15767]                                  |   |
| <b>FES</b>     | Feline sarcoma oncogene [Source:HGNC Symbol;Acc:3657]                                    |   |
| <b>FEZ1</b>    | Fasciculation and elongation protein zeta 1 (zygin I) [Source:HGNC Symbol;Acc:3659]      |   |
| <b>FEZF2</b>   | FEZ family zinc finger 2 [Source:HGNC Symbol;Acc:13506]                                  |   |
| <b>FFAR1</b>   | Free fatty acid receptor 1 [Source:HGNC Symbol;Acc:4498]                                 |   |
| <b>FGB</b>     | Fibrinogen beta chain [Source:HGNC Symbol;Acc:3662]                                      |   |
| <b>FGD1</b>    | FYVE, rhogef and PH domain containing 1 [Source:HGNC Symbol;Acc:3663]                    |   |
| <b>FGD2</b>    | FYVE, rhogef and PH domain containing 2 [Source:HGNC Symbol;Acc:3664]                    |   |
| <b>FGD3</b>    | FYVE, rhogef and PH domain containing 3 [Source:HGNC Symbol;Acc:16027]                   |   |
| <b>FGD6</b>    | FYVE, rhogef and PH domain containing 6 [Source:HGNC Symbol;Acc:21740]                   |   |
| <b>FGF11</b>   | Fibroblast growth factor 11 [Source:HGNC Symbol;Acc:3667]                                |   |
| <b>FGF12</b>   | Fibroblast growth factor 12 [Source:HGNC Symbol;Acc:3668]                                |   |
| <b>FGF19</b>   | Fibroblast growth factor 19 [Source:HGNC Symbol;Acc:3675]                                |   |
| <b>FGF2</b>    | Fibroblast growth factor 2 (basic) [Source:HGNC Symbol;Acc:3676]                         |   |
| <b>FGF23</b>   | Fibroblast growth factor 23 [Source:HGNC Symbol;Acc:3680]                                |   |
| <b>FGF8</b>    | Fibroblast growth factor 8 (androgen-induced) [Source:HGNC Symbol;Acc:3686]              |   |
| <b>FGFR1</b>   | Fibroblast growth factor receptor 1                                                      | √ |
| <b>FGFR1OP</b> | FGFR1 oncogene partner                                                                   | √ |
| <b>FGFR2</b>   | Fibroblast growth factor receptor 2                                                      | √ |
| <b>FGFRL1</b>  | Fibroblast growth factor receptor-like 1 [Source:HGNC Symbol;Acc:3693]                   |   |
| <b>FHAD1</b>   | Forkhead-associated (FHA) phosphopeptide binding domain 1 [Source:HGNC Symbol;Acc:29408] |   |
| <b>FHDC1</b>   | FH2 domain containing 1 [Source:HGNC Symbol;Acc:29363]                                   |   |
| <b>FHIT</b>    | Fragile histidine triad gene                                                             | √ |

|                |                                                                                |  |
|----------------|--------------------------------------------------------------------------------|--|
| <b>FHL1</b>    | Four and a half LIM domains 1 [Source:HGNC Symbol;Acc:3702]                    |  |
| <b>FHL2</b>    | Four and a half LIM domains 2 [Source:HGNC Symbol;Acc:3703]                    |  |
| <b>FHOD3</b>   | Formin homology 2 domain containing 3 [Source:HGNC Symbol;Acc:26178]           |  |
| <b>FIBCD1</b>  | Fibrinogen C domain containing 1 [Source:HGNC Symbol;Acc:25922]                |  |
| <b>FIGN</b>    | Fidgetin [Source:HGNC Symbol;Acc:13285]                                        |  |
| <b>FIZ1</b>    | FLT3-interacting zinc finger 1 [Source:HGNC Symbol;Acc:25917]                  |  |
| <b>FKBP14</b>  | FK506 binding protein 14, 22 kda [Source:HGNC Symbol;Acc:18625]                |  |
| <b>FKBP15</b>  | FK506 binding protein 15, 133kda [Source:HGNC Symbol;Acc:23397]                |  |
| <b>FKBP1A</b>  | FK506 binding protein 1A, 12kda [Source:HGNC Symbol;Acc:3711]                  |  |
| <b>FKBP1C</b>  | FK506 binding protein 1C [Source:HGNC Symbol;Acc:21376]                        |  |
| <b>FKBP2</b>   | FK506 binding protein 2, 13kda [Source:HGNC Symbol;Acc:3718]                   |  |
| <b>FKBP5</b>   | FK506 binding protein 5 [Source:HGNC Symbol;Acc:3721]                          |  |
| <b>FKBP6</b>   | FK506 binding protein 6, 36kda [Source:HGNC Symbol;Acc:3722]                   |  |
| <b>FKBP9</b>   | FK506 binding protein 9, 63 kda [Source:HGNC Symbol;Acc:3725]                  |  |
| <b>FKTN</b>    | Fukutin [Source:HGNC Symbol;Acc:3622]                                          |  |
| <b>FLNB</b>    | Filamin B, beta [Source:HGNC Symbol;Acc:3755]                                  |  |
| <b>FLNC</b>    | Filamin C, gamma [Source:HGNC Symbol;Acc:3756]                                 |  |
| <b>FLOT1</b>   | Flotillin 1 [Source:HGNC Symbol;Acc:3757]                                      |  |
| <b>FLRT2</b>   | Fibronectin leucine rich transmembrane protein 2 [Source:HGNC Symbol;Acc:3761] |  |
| <b>FLRT3</b>   | Fibronectin leucine rich transmembrane protein 3 [Source:HGNC Symbol;Acc:3762] |  |
| <b>FLT4</b>    | Fms-related tyrosine kinase 4 [Source:HGNC Symbol;Acc:3767]                    |  |
| <b>FLYWCH1</b> | FLYWCH-type zinc finger 1 [Source:HGNC Symbol;Acc:25404]                       |  |
| <b>FLYWCH2</b> | FLYWCH family member 2 [Source:HGNC Symbol;Acc:25178]                          |  |
| <b>FMN2</b>    | Formin 2 [Source:HGNC Symbol;Acc:14074]                                        |  |
| <b>FMO3</b>    | Flavin containing monooxygenase 3 [Source:HGNC Symbol;Acc:3771]                |  |
| <b>FMO4</b>    | Flavin containing monooxygenase 4 [Source:HGNC Symbol;Acc:3772]                |  |
| <b>FMR1</b>    | Fragile X mental retardation 1 [Source:HGNC Symbol;Acc:3775]                   |  |
| <b>FMR1NB</b>  | Fragile X mental retardation 1 neighbor [Source:HGNC Symbol;Acc:26372]         |  |
| <b>FN1</b>     | Fibronectin 1 [Source:HGNC Symbol;Acc:3778]                                    |  |
| <b>FN3K</b>    | Fructosamine 3 kinase [Source:HGNC Symbol;Acc:24822]                           |  |

|                |                                                                                       |   |
|----------------|---------------------------------------------------------------------------------------|---|
| <b>FN3KRP</b>  | Fructosamine 3 kinase related protein [Source:HGNC Symbol;Acc:25700]                  |   |
| <b>FNBP1</b>   | Formin binding protein 1                                                              | √ |
| <b>FNBP1L</b>  | Formin binding protein 1-like [Source:HGNC Symbol;Acc:20851]                          |   |
| <b>FNBP4</b>   | Formin binding protein 4 [Source:HGNC Symbol;Acc:19752]                               |   |
| <b>FNDC1</b>   | Fibronectin type III domain containing 1 [Source:HGNC Symbol;Acc:21184]               |   |
| <b>FNDC3A</b>  | Fibronectin type III domain containing 3A [Source:HGNC Symbol;Acc:20296]              |   |
| <b>FNDC3B</b>  | Fibronectin type III domain containing 3B [Source:HGNC Symbol;Acc:24670]              |   |
| <b>FNDC4</b>   | Fibronectin type III domain containing 4 [Source:HGNC Symbol;Acc:20239]               |   |
| <b>FNDC5</b>   | Fibronectin type III domain containing 5 [Source:HGNC Symbol;Acc:20240]               |   |
| <b>FNDC7</b>   | Fibronectin type III domain containing 7 [Source:HGNC Symbol;Acc:26668]               |   |
| <b>FNDC9</b>   | Fibronectin type III domain containing 9 [Source:HGNC Symbol;Acc:33547]               |   |
| <b>FNIP1</b>   | Folliculin interacting protein 1 [Source:HGNC Symbol;Acc:29418]                       |   |
| <b>FNIP2</b>   | Folliculin interacting protein 2 [Source:HGNC Symbol;Acc:29280]                       |   |
| <b>FNTB</b>    | Farnesyltransferase, CAAX box, beta [Source:HGNC Symbol;Acc:3785]                     |   |
| <b>FOLH1</b>   | Folate hydrolase (prostate-specific membrane antigen) 1 [Source:HGNC Symbol;Acc:3788] |   |
| <b>FOXA3</b>   | Forkhead box A3 [Source:HGNC Symbol;Acc:5023]                                         |   |
| <b>FOXC1</b>   | Forkhead box C1 [Source:HGNC Symbol;Acc:3800]                                         |   |
| <b>FOXD4</b>   | Forkhead box D4 [Source:HGNC Symbol;Acc:3805]                                         |   |
| <b>FOXD4L1</b> | Forkhead box D4-like 1 [Source:HGNC Symbol;Acc:18521]                                 |   |
| <b>FOXD4L3</b> | Forkhead box D4-like 3 [Source:HGNC Symbol;Acc:18523]                                 |   |
| <b>FOXD4L6</b> | Forkhead box D4-like 6 [Source:HGNC Symbol;Acc:31986]                                 |   |
| <b>FOXH1</b>   | Forkhead box H1 [Source:HGNC Symbol;Acc:3814]                                         |   |
| <b>FOXK1</b>   | Forkhead box K1 [Source:HGNC Symbol;Acc:23480]                                        |   |
| <b>FOXM1</b>   | Forkhead box M1 [Source:HGNC Symbol;Acc:3818]                                         |   |
| <b>FOXN4</b>   | Forkhead box N4 [Source:HGNC Symbol;Acc:21399]                                        |   |

|                 |                                                                                                                    |   |
|-----------------|--------------------------------------------------------------------------------------------------------------------|---|
| <b>FOXO3</b>    | Forkhead box O3 [Source:HGNC Symbol;Acc:3821]                                                                      |   |
| <b>FOXO4</b>    | Forkhead box O4 [Source:HGNC Symbol;Acc:7139]                                                                      |   |
| <b>FOXP1</b>    | Forkhead box P1                                                                                                    | √ |
| <b>FOXP2</b>    | Forkhead box P2 [Source:HGNC Symbol;Acc:13875]                                                                     |   |
| <b>FOXP4</b>    | Forkhead box P4 [Source:HGNC Symbol;Acc:20842]                                                                     |   |
| <b>FOXRED2</b>  | FAD-dependent oxidoreductase domain containing 2 [Source:HGNC Symbol;Acc:26264]                                    |   |
| <b>FPR2</b>     | Formyl peptide receptor 2 [Source:HGNC Symbol;Acc:3827]                                                            |   |
| <b>FRA10AC1</b> | Fragile site, folic acid type, rare, fra(10)(q23.3) or fra(10)(q24.2) candidate 1 [Source:HGNC Symbol;Acc:1162]    |   |
| <b>FRAS1</b>    | Fraser syndrome 1 [Source:HGNC Symbol;Acc:19185]                                                                   |   |
| <b>FRAT1</b>    | Frequently rearranged in advanced T-cell lymphomas [Source:HGNC Symbol;Acc:3944]                                   |   |
| <b>FREM1</b>    | FRAS1 related extracellular matrix 1 [Source:HGNC Symbol;Acc:23399]                                                |   |
| <b>FREM2</b>    | FRAS1 related extracellular matrix protein 2 [Source:HGNC Symbol;Acc:25396]                                        |   |
| <b>FRG1B</b>    | FSDH region gene 1 family, member B [Source:HGNC Symbol;Acc:15792]                                                 |   |
| <b>FRMD4A</b>   | FERM domain containing 4A [Source:HGNC Symbol;Acc:25491]                                                           |   |
| <b>FRMD8</b>    | FERM domain containing 8 [Source:HGNC Symbol;Acc:25462]                                                            |   |
| <b>FRMPD1</b>   | FERM and PDZ domain containing 1 [Source:HGNC Symbol;Acc:29159]                                                    |   |
| <b>FRMPD2</b>   | FERM and PDZ domain containing 2 [Source:HGNC Symbol;Acc:28572]                                                    |   |
| <b>FRMPD4</b>   | FERM and PDZ domain containing 4 [Source:HGNC Symbol;Acc:29007]                                                    |   |
| <b>FRRS1</b>    | Ferric-chelate reductase 1 [Source:HGNC Symbol;Acc:27622]                                                          |   |
| <b>FRS2</b>     | Fibroblast growth factor receptor substrate 2 [Source:HGNC Symbol;Acc:16971]                                       |   |
| <b>FRY</b>      | Furry homolog (Drosophila) [Source:HGNC Symbol;Acc:20367]                                                          |   |
| <b>FRYL</b>     | FRY-like [Source:HGNC Symbol;Acc:29127]                                                                            |   |
| <b>FSCB</b>     | Fibrous sheath CABYR binding protein [Source:HGNC Symbol;Acc:20494]                                                |   |
| <b>FSCN3</b>    | Fascin homolog 3, actin-bundling protein, testicular (Strongylocentrotus purpuratus) [Source:HGNC Symbol;Acc:3961] |   |
| <b>FSD1L</b>    | Fibronectin type III and SPRY domain containing 1-like [Source:HGNC Symbol;Acc:13753]                              |   |
| <b>FSIP1</b>    | Fibrous sheath interacting protein 1 [Source:HGNC Symbol;Acc:21674]                                                |   |

|               |                                                                                                               |  |
|---------------|---------------------------------------------------------------------------------------------------------------|--|
| <b>FSIP2</b>  | Fibrous sheath interacting protein 2 [Source:HGNC Symbol;Acc:21675]                                           |  |
| <b>FST</b>    | Follistatin [Source:HGNC Symbol;Acc:3971]                                                                     |  |
| <b>FSTL1</b>  | Follistatin-like 1 [Source:HGNC Symbol;Acc:3972]                                                              |  |
| <b>FSTL4</b>  | Follistatin-like 4 [Source:HGNC Symbol;Acc:21389]                                                             |  |
| <b>FTO</b>    | Fat mass and obesity associated [Source:HGNC Symbol;Acc:24678]                                                |  |
| <b>FTSJ2</b>  | Ftsj homolog 2 (E. Coli) [Source:HGNC Symbol;Acc:16352]                                                       |  |
| <b>FTSJD1</b> | Ftsj methyltransferase domain containing 1 [Source:HGNC Symbol;Acc:25635]                                     |  |
| <b>FTSJD2</b> | Ftsj methyltransferase domain containing 2 [Source:HGNC Symbol;Acc:21077]                                     |  |
| <b>FUCA1</b>  | Fucosidase, alpha-L- 1, tissue [Source:HGNC Symbol;Acc:4006]                                                  |  |
| <b>FUCA2</b>  | Fucosidase, alpha-L- 2, plasma [Source:HGNC Symbol;Acc:4008]                                                  |  |
| <b>FUNDC2</b> | FUN14 domain containing 2 [Source:HGNC Symbol;Acc:24925]                                                      |  |
| <b>FURIN</b>  | Furin (paired basic amino acid cleaving enzyme) [Source:HGNC Symbol;Acc:8568]                                 |  |
| <b>FUT11</b>  | Fucosyltransferase 11 (alpha (1,3) fucosyltransferase) [Source:HGNC Symbol;Acc:19233]                         |  |
| <b>FUT3</b>   | Fucosyltransferase 3 (galactoside 3(4)-L-fucosyltransferase, Lewis blood group) [Source:HGNC Symbol;Acc:4014] |  |
| <b>FUT4</b>   | Fucosyltransferase 4 (alpha (1,3) fucosyltransferase, myeloid-specific) [Source:HGNC Symbol;Acc:4015]         |  |
| <b>FUT6</b>   | Fucosyltransferase 6 (alpha (1,3) fucosyltransferase) [Source:HGNC Symbol;Acc:4017]                           |  |
| <b>FUT7</b>   | Fucosyltransferase 7 (alpha (1,3) fucosyltransferase) [Source:HGNC Symbol;Acc:4018]                           |  |
| <b>FXC1</b>   | Fracture callus 1 homolog (rat) [Source:HGNC Symbol;Acc:4022]                                                 |  |
| <b>FXYD4</b>  | FXYD domain containing ion transport regulator 4 [Source:HGNC Symbol;Acc:4028]                                |  |
| <b>FYCO1</b>  | FYVE and coiled-coil domain containing 1 [Source:HGNC Symbol;Acc:14673]                                       |  |
| <b>FZD4</b>   | Frizzled homolog 4 (Drosophila) [Source:HGNC Symbol;Acc:4042]                                                 |  |
| <b>FZD5</b>   | Frizzled homolog 5 (Drosophila) [Source:HGNC Symbol;Acc:4043]                                                 |  |
| <b>GAA</b>    | Glucosidase, alpha; acid [Source:HGNC Symbol;Acc:4065]                                                        |  |

|                |                                                                                        |  |
|----------------|----------------------------------------------------------------------------------------|--|
| <b>GAB1</b>    | GRB2-associated binding protein 1 [Source:HGNC Symbol;Acc:4066]                        |  |
| <b>GAB2</b>    | GRB2-associated binding protein 2 [Source:HGNC Symbol;Acc:14458]                       |  |
| <b>GAB3</b>    | GRB2-associated binding protein 3 [Source:HGNC Symbol;Acc:17515]                       |  |
| <b>GAB4</b>    | GRB2-associated binding protein family, member 4 [Source:HGNC Symbol;Acc:18325]        |  |
| <b>GABPB2</b>  | GA binding protein transcription factor, beta subunit 2 [Source:HGNC Symbol;Acc:28441] |  |
| <b>GABRA1</b>  | Gamma-aminobutyric acid (GABA) A receptor, alpha 1 [Source:HGNC Symbol;Acc:4075]       |  |
| <b>GABRA4</b>  | Gamma-aminobutyric acid (GABA) A receptor, alpha 4 [Source:HGNC Symbol;Acc:4078]       |  |
| <b>GABRB1</b>  | Gamma-aminobutyric acid (GABA) A receptor, beta 1 [Source:HGNC Symbol;Acc:4081]        |  |
| <b>GABRB2</b>  | Gamma-aminobutyric acid (GABA) A receptor, beta 2 [Source:HGNC Symbol;Acc:4082]        |  |
| <b>GABRD</b>   | Gamma-aminobutyric acid (GABA) A receptor, delta [Source:HGNC Symbol;Acc:4084]         |  |
| <b>GABRG1</b>  | Gamma-aminobutyric acid (GABA) A receptor, gamma 1 [Source:HGNC Symbol;Acc:4086]       |  |
| <b>GABRG3</b>  | Gamma-aminobutyric acid (GABA) A receptor, gamma 3 [Source:HGNC Symbol;Acc:4088]       |  |
| <b>GABRR1</b>  | Gamma-aminobutyric acid (GABA) receptor, rho 1 [Source:HGNC Symbol;Acc:4090]           |  |
| <b>GAD1</b>    | Glutamate decarboxylase 1 (brain, 67kda) [Source:HGNC Symbol;Acc:4092]                 |  |
| <b>GADD45A</b> | Growth arrest and DNA-damage-inducible, alpha [Source:HGNC Symbol;Acc:4095]            |  |
| <b>GADD45B</b> | Growth arrest and DNA-damage-inducible, beta [Source:HGNC Symbol;Acc:4096]             |  |
| <b>GADL1</b>   | Glutamate decarboxylase-like 1 [Source:HGNC Symbol;Acc:27949]                          |  |
| <b>GAGE1</b>   | G antigen 1 [Source:HGNC Symbol;Acc:4098]                                              |  |
| <b>GAGE12C</b> | G antigen 12C [Source:HGNC Symbol;Acc:28402]                                           |  |
| <b>GAGE12D</b> | G antigen 12D [Source:HGNC Symbol;Acc:31904]                                           |  |

|                |                                                                                                                              |  |
|----------------|------------------------------------------------------------------------------------------------------------------------------|--|
| <b>GAGE12E</b> | G antigen 12E [Source:HGNC Symbol;Acc:31905]                                                                                 |  |
| <b>GAGE12F</b> | G antigen 12F [Source:HGNC Symbol;Acc:31906]                                                                                 |  |
| <b>GAGE12G</b> | G antigen 12G [Source:HGNC Symbol;Acc:31907]                                                                                 |  |
| <b>GAGE12I</b> | G antigen 12I [Source:HGNC Symbol;Acc:4105]                                                                                  |  |
| <b>GAGE13</b>  | G antigen 13 [Source:HGNC Symbol;Acc:29081]                                                                                  |  |
| <b>GAGE2A</b>  | G antigen 2A [Source:HGNC Symbol;Acc:4099]                                                                                   |  |
| <b>GAGE2B</b>  | G antigen 2B [Source:HGNC Symbol;Acc:31957]                                                                                  |  |
| <b>GAGE2C</b>  | G antigen 2C [Source:HGNC Symbol;Acc:31958]                                                                                  |  |
| <b>GAGE2D</b>  | G antigen 2D [Source:HGNC Symbol;Acc:31959]                                                                                  |  |
| <b>GAGE2E</b>  | G antigen 2E [Source:HGNC Symbol;Acc:31960]                                                                                  |  |
| <b>GAGE4</b>   | G antigen 4 [Source:HGNC Symbol;Acc:4101]                                                                                    |  |
| <b>GAL3ST1</b> | Galactose-3-O-sulfotransferase 1 [Source:HGNC Symbol;Acc:24240]                                                              |  |
| <b>GALC</b>    | Galactosylceramidase [Source:HGNC Symbol;Acc:4115]                                                                           |  |
| <b>GALK2</b>   | Galactokinase 2 [Source:HGNC Symbol;Acc:4119]                                                                                |  |
| <b>GALNT3</b>  | UDP-N-acetyl-alpha-D-galactosamine:polypeptide N-acetylgalactosaminyltransferase 3 (galnac-T3) [Source:HGNC Symbol;Acc:4125] |  |
| <b>GALNT5</b>  | UDP-N-acetyl-alpha-D-galactosamine:polypeptide N-acetylgalactosaminyltransferase 5 (galnac-T5) [Source:HGNC Symbol;Acc:4127] |  |
| <b>GALNT6</b>  | UDP-N-acetyl-alpha-D-galactosamine:polypeptide N-acetylgalactosaminyltransferase 6 (galnac-T6) [Source:HGNC Symbol;Acc:4128] |  |
| <b>GALNT9</b>  | UDP-N-acetyl-alpha-D-galactosamine:polypeptide N-acetylgalactosaminyltransferase 9 (galnac-T9) [Source:HGNC Symbol;Acc:4131] |  |
| <b>GALNTL1</b> | UDP-N-acetyl-alpha-D-galactosamine:polypeptide N-acetylgalactosaminyltransferase-like 1 [Source:HGNC Symbol;Acc:23233]       |  |
| <b>GALNTL2</b> | UDP-N-acetyl-alpha-D-galactosamine:polypeptide N-acetylgalactosaminyltransferase-like 2 [Source:HGNC Symbol;Acc:21531]       |  |
| <b>GALR2</b>   | Galanin receptor 2 [Source:HGNC Symbol;Acc:4133]                                                                             |  |
| <b>GALR3</b>   | Galanin receptor 3 [Source:HGNC Symbol;Acc:4134]                                                                             |  |
| <b>GAN</b>     | Gigaxonin [Source:HGNC Symbol;Acc:4137]                                                                                      |  |



|                |                                                                                                  |   |
|----------------|--------------------------------------------------------------------------------------------------|---|
| <b>GANAB</b>   | Glucosidase, alpha; neutral AB [Source:HGNC Symbol;Acc:4138]                                     |   |
| <b>GANC</b>    | Glucosidase, alpha; neutral C [Source:HGNC Symbol;Acc:4139]                                      |   |
| <b>GAPVD1</b>  | Gtpase activating protein and VPS9 domains 1 [Source:HGNC Symbol;Acc:23375]                      |   |
| <b>GARNL3</b>  | Gtpase activating Rap/rangap domain-like 3 [Source:HGNC Symbol;Acc:25425]                        |   |
| <b>GARS</b>    | Glycyl-trna synthetase [Source:HGNC Symbol;Acc:4162]                                             |   |
| <b>GAS6</b>    | Growth arrest-specific 6 [Source:HGNC Symbol;Acc:4168]                                           |   |
| <b>GAS7</b>    | Growth arrest-specific 7                                                                         | √ |
| <b>GAS8</b>    | Growth arrest-specific 8 [Source:HGNC Symbol;Acc:4166]                                           |   |
| <b>GATA2</b>   | GATA binding protein 2                                                                           | √ |
| <b>GATA3</b>   | GATA binding protein 3                                                                           | √ |
| <b>GATAD2B</b> | GATA zinc finger domain containing 2B [Source:HGNC Symbol;Acc:30778]                             |   |
| <b>GATM</b>    | Glycine amidinotransferase (L-arginine:glycine amidinotransferase) [Source:HGNC Symbol;Acc:4175] |   |
| <b>GATSL2</b>  | GATS protein-like 2 [Source:HGNC Symbol;Acc:37073]                                               |   |
| <b>GBA2</b>    | Glucosidase, beta (bile acid) 2 [Source:HGNC Symbol;Acc:18986]                                   |   |
| <b>GBF1</b>    | Golgi brefeldin A resistant guanine nucleotide exchange factor 1 [Source:HGNC Symbol;Acc:4181]   |   |
| <b>GBGT1</b>   | Globoside alpha-1,3-N-acetylgalactosaminyltransferase 1 [Source:HGNC Symbol;Acc:20460]           |   |
| <b>GBP4</b>    | Guanylate binding protein 4 [Source:HGNC Symbol;Acc:20480]                                       |   |
| <b>GC</b>      | Group-specific component (vitamin D binding protein) [Source:HGNC Symbol;Acc:4187]               |   |
| <b>GCAT</b>    | Glycine C-acetyltransferase [Source:HGNC Symbol;Acc:4188]                                        |   |
| <b>GCDH</b>    | Glutaryl-coa dehydrogenase [Source:HGNC Symbol;Acc:4189]                                         |   |
| <b>GCFC1</b>   | GC-rich sequence DNA-binding factor 1 [Source:HGNC Symbol;Acc:13579]                             |   |
| <b>GCN1L1</b>  | GCN1 general control of amino-acid synthesis 1-like 1 (yeast) [Source:HGNC Symbol;Acc:4199]      |   |
| <b>GCNT3</b>   | Glucosaminyl (N-acetyl) transferase 3, mucin type [Source:HGNC Symbol;Acc:4205]                  |   |

|               |                                                                                                      |  |
|---------------|------------------------------------------------------------------------------------------------------|--|
| <b>GCNT7</b>  | Glucosaminyl (N-acetyl) transferase family member 7 [Source:HGNC Symbol;Acc:16099]                   |  |
| <b>GDA</b>    | Guanine deaminase [Source:HGNC Symbol;Acc:4212]                                                      |  |
| <b>GDF10</b>  | Growth differentiation factor 10 [Source:HGNC Symbol;Acc:4215]                                       |  |
| <b>GDF11</b>  | Growth differentiation factor 11 [Source:HGNC Symbol;Acc:4216]                                       |  |
| <b>GDF3</b>   | Growth differentiation factor 3 [Source:HGNC Symbol;Acc:4218]                                        |  |
| <b>GDF5</b>   | Growth differentiation factor 5 [Source:HGNC Symbol;Acc:4220]                                        |  |
| <b>GDF5OS</b> | Growth differentiation factor 5 opposite strand [Source:HGNC Symbol;Acc:33435]                       |  |
| <b>GDF7</b>   | Growth differentiation factor 7 [Source:HGNC Symbol;Acc:4222]                                        |  |
| <b>GDI1</b>   | GDP dissociation inhibitor 1 [Source:HGNC Symbol;Acc:4226]                                           |  |
| <b>GDPD2</b>  | Glycerophosphodiester phosphodiesterase domain containing 2 [Source:HGNC Symbol;Acc:25974]           |  |
| <b>GEMIN7</b> | Gem (nuclear organelle) associated protein 7 [Source:HGNC Symbol;Acc:20045]                          |  |
| <b>GEN1</b>   | Gen homolog 1, endonuclease (Drosophila) [Source:HGNC Symbol;Acc:26881]                              |  |
| <b>GFM1</b>   | G elongation factor, mitochondrial 1 [Source:HGNC Symbol;Acc:13780]                                  |  |
| <b>GFOD2</b>  | Glucose-fructose oxidoreductase domain containing 2 [Source:HGNC Symbol;Acc:28159]                   |  |
| <b>GFPT1</b>  | Glutamine--fructose-6-phosphate transaminase 1 [Source:HGNC Symbol;Acc:4241]                         |  |
| <b>GFRA2</b>  | GDNF family receptor alpha 2 [Source:HGNC Symbol;Acc:4244]                                           |  |
| <b>GGA3</b>   | Golgi-associated, gamma adaptin ear containing, ARF binding protein 3 [Source:HGNC Symbol;Acc:17079] |  |
| <b>GGCX</b>   | Gamma-glutamyl carboxylase [Source:HGNC Symbol;Acc:4247]                                             |  |
| <b>GGH</b>    | Gamma-glutamyl hydrolase (conjugase, foylpolypolyglutamyl hydrolase) [Source:HGNC Symbol;Acc:4248]   |  |
| <b>GGT1</b>   | Gamma-glutamyltransferase 1 [Source:HGNC Symbol;Acc:4250]                                            |  |
| <b>GGT2</b>   | Gamma-glutamyltransferase 2 [Source:HGNC Symbol;Acc:4251]                                            |  |
| <b>GGT6</b>   | Gamma-glutamyltransferase 6 [Source:HGNC Symbol;Acc:26891]                                           |  |
| <b>GGT7</b>   | Gamma-glutamyltransferase 7 [Source:HGNC Symbol;Acc:4259]                                            |  |
| <b>GHDC</b>   | GH3 domain containing [Source:HGNC Symbol;Acc:24438]                                                 |  |

|               |                                                                                      |  |
|---------------|--------------------------------------------------------------------------------------|--|
| <b>GHR</b>    | Growth hormone receptor [Source:HGNC Symbol;Acc:4263]                                |  |
| <b>GHSR</b>   | Growth hormone secretagogue receptor [Source:HGNC Symbol;Acc:4267]                   |  |
| <b>GIGYF1</b> | GRB10 interacting GYF protein 1 [Source:HGNC Symbol;Acc:9126]                        |  |
| <b>GIGYF2</b> | GRB10 interacting GYF protein 2 [Source:HGNC Symbol;Acc:11960]                       |  |
| <b>GINS2</b>  | GINS complex subunit 2 (Psf2 homolog) [Source:HGNC Symbol;Acc:24575]                 |  |
| <b>GIPC1</b>  | GIPC PDZ domain containing family, member 1 [Source:HGNC Symbol;Acc:1226]            |  |
| <b>GIPC2</b>  | GIPC PDZ domain containing family, member 2 [Source:HGNC Symbol;Acc:18177]           |  |
| <b>GIT1</b>   | G protein-coupled receptor kinase interacting arfgap 1 [Source:HGNC Symbol;Acc:4272] |  |
| <b>GJB3</b>   | Gap junction protein, beta 3, 31kda [Source:HGNC Symbol;Acc:4285]                    |  |
| <b>GJB4</b>   | Gap junction protein, beta 4, 30.3kda [Source:HGNC Symbol;Acc:4286]                  |  |
| <b>GJB6</b>   | Gap junction protein, beta 6, 30kda [Source:HGNC Symbol;Acc:4288]                    |  |
| <b>GJB7</b>   | Gap junction protein, beta 7, 25kda [Source:HGNC Symbol;Acc:16690]                   |  |
| <b>GKN1</b>   | Gastrokine 1 [Source:HGNC Symbol;Acc:23217]                                          |  |
| <b>GLB1</b>   | Galactosidase, beta 1 [Source:HGNC Symbol;Acc:4298]                                  |  |
| <b>GLB1L</b>  | Galactosidase, beta 1-like [Source:HGNC Symbol;Acc:28129]                            |  |
| <b>GLB1L3</b> | Galactosidase, beta 1-like 3 [Source:HGNC Symbol;Acc:25147]                          |  |
| <b>GLG1</b>   | Golgi glycoprotein 1 [Source:HGNC Symbol;Acc:4316]                                   |  |
| <b>GLI2</b>   | GLI family zinc finger 2 [Source:HGNC Symbol;Acc:4318]                               |  |
| <b>GLI3</b>   | GLI family zinc finger 3 [Source:HGNC Symbol;Acc:4319]                               |  |
| <b>GLIPR1</b> | GLI pathogenesis-related 1 [Source:HGNC Symbol;Acc:17001]                            |  |
| <b>GLIS3</b>  | GLIS family zinc finger 3 [Source:HGNC Symbol;Acc:28510]                             |  |
| <b>GLP2R</b>  | Glucagon-like peptide 2 receptor [Source:HGNC Symbol;Acc:4325]                       |  |
| <b>GLRA3</b>  | Glycine receptor, alpha 3 [Source:HGNC Symbol;Acc:4328]                              |  |
| <b>GLRX</b>   | Glutaredoxin (thioltransferase) [Source:HGNC Symbol;Acc:4330]                        |  |
| <b>GLRX2</b>  | Glutaredoxin 2 [Source:HGNC Symbol;Acc:16065]                                        |  |
| <b>GLS</b>    | Glutaminase [Source:HGNC Symbol;Acc:4331]                                            |  |
| <b>GLT1D1</b> | Glycosyltransferase 1 domain containing 1 [Source:HGNC Symbol;Acc:26483]             |  |

|                |                                                                                                                                     |   |
|----------------|-------------------------------------------------------------------------------------------------------------------------------------|---|
| <b>GLT25D2</b> | Glycosyltransferase 25 domain containing 2 [Source:HGNC Symbol;Acc:16790]                                                           |   |
| <b>GLT8D1</b>  | Glycosyltransferase 8 domain containing 1 [Source:HGNC Symbol;Acc:24870]                                                            |   |
| <b>GLUD1</b>   | Glutamate dehydrogenase 1 [Source:HGNC Symbol;Acc:4335]                                                                             |   |
| <b>GLYAT</b>   | Glycine-N-acyltransferase [Source:HGNC Symbol;Acc:13734]                                                                            |   |
| <b>GLYATL2</b> | Glycine-N-acyltransferase-like 2 [Source:HGNC Symbol;Acc:24178]                                                                     |   |
| <b>GLYR1</b>   | Glyoxylate reductase 1 homolog (Arabidopsis) [Source:HGNC Symbol;Acc:24434]                                                         |   |
| <b>GMDS</b>    | GDP-mannose 4,6-dehydratase [Source:HGNC Symbol;Acc:4369]                                                                           |   |
| <b>GMEB2</b>   | Glucocorticoid modulatory element binding protein 2 [Source:HGNC Symbol;Acc:4371]                                                   |   |
| <b>GMFB</b>    | Glia maturation factor, beta [Source:HGNC Symbol;Acc:4373]                                                                          |   |
| <b>GMIP</b>    | GEM interacting protein [Source:HGNC Symbol;Acc:24852]                                                                              |   |
| <b>GMPPB</b>   | GDP-mannose pyrophosphorylase B [Source:HGNC Symbol;Acc:22932]                                                                      |   |
| <b>GMPR2</b>   | Guanosine monophosphate reductase 2 [Source:HGNC Symbol;Acc:4377]                                                                   |   |
| <b>GNA12</b>   | Guanine nucleotide binding protein (G protein) alpha 12 [Source:HGNC Symbol;Acc:4380]                                               |   |
| <b>GNA14</b>   | Guanine nucleotide binding protein (G protein), alpha 14 [Source:HGNC Symbol;Acc:4382]                                              |   |
| <b>GNAI2</b>   | Guanine nucleotide binding protein (G protein), alpha inhibiting activity polypeptide 2 [Source:HGNC Symbol;Acc:4385]               |   |
| <b>GNAI3</b>   | Guanine nucleotide binding protein (G protein), alpha inhibiting activity polypeptide 3 [Source:HGNC Symbol;Acc:4387]               |   |
| <b>GNAL</b>    | Guanine nucleotide binding protein (G protein), alpha activating activity polypeptide, olfactory type [Source:HGNC Symbol;Acc:4388] |   |
| <b>GNAO1</b>   | Guanine nucleotide binding protein (G protein), alpha activating activity polypeptide O [Source:HGNC Symbol;Acc:4389]               |   |
| <b>GNAQ</b>    | Guanine nucleotide binding protein (G protein), q polypeptide                                                                       | √ |
| <b>GNAS</b>    | GNAS complex locus                                                                                                                  | √ |
| <b>GNB1L</b>   | Guanine nucleotide binding protein (G protein), beta polypeptide 1-like [Source:HGNC Symbol;Acc:4397]                               |   |

|                 |                                                                                                                 |   |
|-----------------|-----------------------------------------------------------------------------------------------------------------|---|
| <b>GNB5</b>     | Guanine nucleotide binding protein (G protein), beta 5 [Source:HGNC Symbol;Acc:4401]                            |   |
| <b>GNG4</b>     | Guanine nucleotide binding protein (G protein), gamma 4 [Source:HGNC Symbol;Acc:4407]                           |   |
| <b>GNG5</b>     | Guanine nucleotide binding protein (G protein), gamma 5 [Source:HGNC Symbol;Acc:4408]                           |   |
| <b>GNL1</b>     | Guanine nucleotide binding protein-like 1 [Source:HGNC Symbol;Acc:4413]                                         |   |
| <b>GNL3L</b>    | Guanine nucleotide binding protein-like 3 (nucleolar)-like [Source:HGNC Symbol;Acc:25553]                       |   |
| <b>GNMT</b>     | Glycine N-methyltransferase [Source:HGNC Symbol;Acc:4415]                                                       |   |
| <b>GNPTAB</b>   | N-acetylglucosamine-1-phosphate transferase, alpha and beta subunits [Source:HGNC Symbol;Acc:29670]             |   |
| <b>GNS</b>      | Glucosamine (N-acetyl)-6-sulfatase [Source:HGNC Symbol;Acc:4422]                                                |   |
| <b>GOLGA3</b>   | Golgin A3 [Source:HGNC Symbol;Acc:4426]                                                                         |   |
| <b>GOLGA4</b>   | Golgin A4 [Source:HGNC Symbol;Acc:4427]                                                                         |   |
| <b>GOLGA5</b>   | Golgin A5                                                                                                       | √ |
| <b>GOLGA6A</b>  | Golgin A6 family, member A [Source:HGNC Symbol;Acc:13567]                                                       |   |
| <b>GOLGA6L9</b> | Golgin A6 family-like 9 [Source:HGNC Symbol;Acc:37229]                                                          |   |
| <b>GOLGA7</b>   | Golgin A7 [Source:HGNC Symbol;Acc:24876]                                                                        |   |
| <b>GOLGA8A</b>  | Golgin A8 family, member A [Source:HGNC Symbol;Acc:31972]                                                       |   |
| <b>GOLGA8B</b>  | Golgin A8 family, member B [Source:HGNC Symbol;Acc:31973]                                                       |   |
| <b>GOLGB1</b>   | Golgin B1 [Source:HGNC Symbol;Acc:4429]                                                                         |   |
| <b>GOLT1B</b>   | Golgi transport 1B [Source:HGNC Symbol;Acc:20175]                                                               |   |
| <b>GORAB</b>    | Golgin, RAB6-interacting [Source:HGNC Symbol;Acc:25676]                                                         |   |
| <b>GORASP1</b>  | Golgi reassembly stacking protein 1, 65kda [Source:HGNC Symbol;Acc:16769]                                       |   |
| <b>GOSR1</b>    | Golgi SNAP receptor complex member 1 [Source:HGNC Symbol;Acc:4430]                                              |   |
| <b>GOSR2</b>    | Golgi SNAP receptor complex member 2 [Source:HGNC Symbol;Acc:4431]                                              |   |
| <b>GOT2</b>     | Glutamic-oxaloacetic transaminase 2, mitochondrial (aspartate aminotransferase 2) [Source:HGNC Symbol;Acc:4433] |   |

|                |                                                                                                                 |   |
|----------------|-----------------------------------------------------------------------------------------------------------------|---|
| <b>GP1BA</b>   | Glycoprotein Ib (platelet), alpha polypeptide [Source:HGNC Symbol;Acc:4439]                                     |   |
| <b>GP2</b>     | Glycoprotein 2 (zymogen granule membrane) [Source:HGNC Symbol;Acc:4441]                                         |   |
| <b>GPAA1</b>   | Glycosylphosphatidylinositol anchor attachment protein 1 homolog (yeast) [Source:HGNC Symbol;Acc:4446]          |   |
| <b>GPAM</b>    | Glycerol-3-phosphate acyltransferase, mitochondrial [Source:HGNC Symbol;Acc:24865]                              |   |
| <b>GPAT2</b>   | Glycerol-3-phosphate acyltransferase 2, mitochondrial [Source:HGNC Symbol;Acc:27168]                            |   |
| <b>GPATCH1</b> | G patch domain containing 1 [Source:HGNC Symbol;Acc:24658]                                                      |   |
| <b>GPBAR1</b>  | G protein-coupled bile acid receptor 1 [Source:HGNC Symbol;Acc:19680]                                           |   |
| <b>GPBP1</b>   | GC-rich promoter binding protein 1 [Source:HGNC Symbol;Acc:29520]                                               |   |
| <b>GPBP1L1</b> | GC-rich promoter binding protein 1-like 1 [Source:HGNC Symbol;Acc:28843]                                        |   |
| <b>GPC1</b>    | Glypican 1 [Source:HGNC Symbol;Acc:4449]                                                                        |   |
| <b>GPC5</b>    | Glypican 5 [Source:HGNC Symbol;Acc:4453]                                                                        |   |
| <b>GPD1</b>    | Glycerol-3-phosphate dehydrogenase 1 (soluble) [Source:HGNC Symbol;Acc:4455]                                    |   |
| <b>GPHN</b>    | Gephyrin                                                                                                        | √ |
| <b>GPIHBP1</b> | Glycosylphosphatidylinositol anchored high density lipoprotein binding protein 1 [Source:HGNC Symbol;Acc:24945] |   |
| <b>GPLD1</b>   | Glycosylphosphatidylinositol specific phospholipase D1 [Source:HGNC Symbol;Acc:4459]                            |   |
| <b>GPM6A</b>   | Glycoprotein M6A [Source:HGNC Symbol;Acc:4460]                                                                  |   |
| <b>GPM6B</b>   | Glycoprotein M6B [Source:HGNC Symbol;Acc:4461]                                                                  |   |
| <b>GPN1</b>    | GPN-loop gtpase 1 [Source:HGNC Symbol;Acc:17030]                                                                |   |
| <b>GPR107</b>  | G protein-coupled receptor 107 [Source:HGNC Symbol;Acc:17830]                                                   |   |
| <b>GPR109A</b> | G protein-coupled receptor 109A [Source:HGNC Symbol;Acc:24827]                                                  |   |
| <b>GPR110</b>  | G protein-coupled receptor 110 [Source:HGNC Symbol;Acc:18990]                                                   |   |
| <b>GPR111</b>  | G protein-coupled receptor 111 [Source:HGNC Symbol;Acc:18991]                                                   |   |
| <b>GPR112</b>  | G protein-coupled receptor 112 [Source:HGNC Symbol;Acc:18992]                                                   |   |
| <b>GPR116</b>  | G protein-coupled receptor 116 [Source:HGNC Symbol;Acc:19030]                                                   |   |

|               |                                                               |  |
|---------------|---------------------------------------------------------------|--|
| <b>GPR120</b> | G protein-coupled receptor 120 [Source:HGNC Symbol;Acc:19061] |  |
| <b>GPR123</b> | G protein-coupled receptor 123 [Source:HGNC Symbol;Acc:13838] |  |
| <b>GPR124</b> | G protein-coupled receptor 124 [Source:HGNC Symbol;Acc:17849] |  |
| <b>GPR125</b> | G protein-coupled receptor 125 [Source:HGNC Symbol;Acc:13839] |  |
| <b>GPR126</b> | G protein-coupled receptor 126 [Source:HGNC Symbol;Acc:13841] |  |
| <b>GPR141</b> | G protein-coupled receptor 141 [Source:HGNC Symbol;Acc:19997] |  |
| <b>GPR15</b>  | G protein-coupled receptor 15 [Source:HGNC Symbol;Acc:4469]   |  |
| <b>GPR151</b> | G protein-coupled receptor 151 [Source:HGNC Symbol;Acc:23624] |  |
| <b>GPR155</b> | G protein-coupled receptor 155 [Source:HGNC Symbol;Acc:22951] |  |
| <b>GPR157</b> | G protein-coupled receptor 157 [Source:HGNC Symbol;Acc:23687] |  |
| <b>GPR160</b> | G protein-coupled receptor 160 [Source:HGNC Symbol;Acc:23693] |  |
| <b>GPR162</b> | G protein-coupled receptor 162 [Source:HGNC Symbol;Acc:16693] |  |
| <b>GPR17</b>  | G protein-coupled receptor 17 [Source:HGNC Symbol;Acc:4471]   |  |
| <b>GPR171</b> | G protein-coupled receptor 171 [Source:HGNC Symbol;Acc:30057] |  |
| <b>GPR176</b> | G protein-coupled receptor 176 [Source:HGNC Symbol;Acc:32370] |  |
| <b>GPR179</b> | G protein-coupled receptor 179 [Source:HGNC Symbol;Acc:31371] |  |
| <b>GPR18</b>  | G protein-coupled receptor 18 [Source:HGNC Symbol;Acc:4472]   |  |
| <b>GPR22</b>  | G protein-coupled receptor 22 [Source:HGNC Symbol;Acc:4477]   |  |
| <b>GPR3</b>   | G protein-coupled receptor 3 [Source:HGNC Symbol;Acc:4484]    |  |
| <b>GPR35</b>  | G protein-coupled receptor 35 [Source:HGNC Symbol;Acc:4492]   |  |
| <b>GPR39</b>  | G protein-coupled receptor 39 [Source:HGNC Symbol;Acc:4496]   |  |
| <b>GPR50</b>  | G protein-coupled receptor 50 [Source:HGNC Symbol;Acc:4506]   |  |
| <b>GPR55</b>  | G protein-coupled receptor 55 [Source:HGNC Symbol;Acc:4511]   |  |
| <b>GPR56</b>  | G protein-coupled receptor 56 [Source:HGNC Symbol;Acc:4512]   |  |
| <b>GPR61</b>  | G protein-coupled receptor 61 [Source:HGNC Symbol;Acc:13300]  |  |
| <b>GPR64</b>  | G protein-coupled receptor 64 [Source:HGNC Symbol;Acc:4516]   |  |
| <b>GPR75</b>  | G protein-coupled receptor 75 [Source:HGNC Symbol;Acc:4526]   |  |
| <b>GPR81</b>  | G protein-coupled receptor 81 [Source:HGNC Symbol;Acc:4532]   |  |
| <b>GPR87</b>  | G protein-coupled receptor 87 [Source:HGNC Symbol;Acc:4538]   |  |
| <b>GPR88</b>  | G protein-coupled receptor 88 [Source:HGNC Symbol;Acc:4539]   |  |
| <b>GPR97</b>  | G protein-coupled receptor 97 [Source:HGNC Symbol;Acc:13728]  |  |
| <b>GPR98</b>  | G protein-coupled receptor 98 [Source:HGNC Symbol;Acc:17416]  |  |

|                |                                                                                            |  |
|----------------|--------------------------------------------------------------------------------------------|--|
| <b>GPRASP2</b> | G protein-coupled receptor associated sorting protein 2 [Source:HGNC Symbol;Acc:25169]     |  |
| <b>GPRC5A</b>  | G protein-coupled receptor, family C, group 5, member A [Source:HGNC Symbol;Acc:9836]      |  |
| <b>GPRC5C</b>  | G protein-coupled receptor, family C, group 5, member C [Source:HGNC Symbol;Acc:13309]     |  |
| <b>GPRC5D</b>  | G protein-coupled receptor, family C, group 5, member D [Source:HGNC Symbol;Acc:13310]     |  |
| <b>GPRIN1</b>  | G protein regulated inducer of neurite outgrowth 1 [Source:HGNC Symbol;Acc:24835]          |  |
| <b>GPRIN2</b>  | G protein regulated inducer of neurite outgrowth 2 [Source:HGNC Symbol;Acc:23730]          |  |
| <b>GPRIN3</b>  | GPRIN family member 3 [Source:HGNC Symbol;Acc:27733]                                       |  |
| <b>GPS1</b>    | G protein pathway suppressor 1 [Source:HGNC Symbol;Acc:4549]                               |  |
| <b>GPS2</b>    | G protein pathway suppressor 2 [Source:HGNC Symbol;Acc:4550]                               |  |
| <b>GPSM2</b>   | G-protein signaling modulator 2 [Source:HGNC Symbol;Acc:29501]                             |  |
| <b>GPT2</b>    | Glutamic pyruvate transaminase (alanine aminotransferase) 2 [Source:HGNC Symbol;Acc:18062] |  |
| <b>GPX4</b>    | Glutathione peroxidase 4 (phospholipid hydroperoxidase) [Source:HGNC Symbol;Acc:4556]      |  |
| <b>GRAMD1B</b> | GRAM domain containing 1B [Source:HGNC Symbol;Acc:29214]                                   |  |
| <b>GRAMD4</b>  | GRAM domain containing 4 [Source:HGNC Symbol;Acc:29113]                                    |  |
| <b>GRAP2</b>   | GRB2-related adaptor protein 2 [Source:HGNC Symbol;Acc:4563]                               |  |
| <b>GRB10</b>   | Growth factor receptor-bound protein 10 [Source:HGNC Symbol;Acc:4564]                      |  |
| <b>GREB1</b>   | Growth regulation by estrogen in breast cancer 1 [Source:HGNC Symbol;Acc:24885]            |  |
| <b>GREB1L</b>  | Growth regulation by estrogen in breast cancer-like [Source:HGNC Symbol;Acc:31042]         |  |
| <b>GREM1</b>   | Gremlin 1 [Source:HGNC Symbol;Acc:2001]                                                    |  |
| <b>GREM2</b>   | Gremlin 2 [Source:HGNC Symbol;Acc:17655]                                                   |  |
| <b>GRHL3</b>   | Grainyhead-like 3 (Drosophila) [Source:HGNC Symbol;Acc:25839]                              |  |



|                |                                                                                                    |  |
|----------------|----------------------------------------------------------------------------------------------------|--|
| <b>GRIA1</b>   | Glutamate receptor, ionotropic, AMPA 1 [Source:HGNC Symbol;Acc:4571]                               |  |
| <b>GRIA3</b>   | Glutamate receptor, ionotropic, AMPA 3 [Source:HGNC Symbol;Acc:4573]                               |  |
| <b>GRIA4</b>   | Glutamate receptor, ionotropic, AMPA 4 [Source:HGNC Symbol;Acc:4574]                               |  |
| <b>GRID1</b>   | Glutamate receptor, ionotropic, delta 1 [Source:HGNC Symbol;Acc:4575]                              |  |
| <b>GRID2</b>   | Glutamate receptor, ionotropic, delta 2 [Source:HGNC Symbol;Acc:4576]                              |  |
| <b>GRID2IP</b> | Glutamate receptor, ionotropic, delta 2 (Grid2) interacting protein [Source:HGNC Symbol;Acc:18464] |  |
| <b>GRIK2</b>   | Glutamate receptor, ionotropic, kainate 2 [Source:HGNC Symbol;Acc:4580]                            |  |
| <b>GRIK3</b>   | Glutamate receptor, ionotropic, kainate 3 [Source:HGNC Symbol;Acc:4581]                            |  |
| <b>GRIK5</b>   | Glutamate receptor, ionotropic, kainate 5 [Source:HGNC Symbol;Acc:4583]                            |  |
| <b>GRIN1</b>   | Glutamate receptor, ionotropic, N-methyl D-aspartate 1 [Source:HGNC Symbol;Acc:4584]               |  |
| <b>GRIN2A</b>  | Glutamate receptor, ionotropic, N-methyl D-aspartate 2A [Source:HGNC Symbol;Acc:4585]              |  |
| <b>GRIN2B</b>  | Glutamate receptor, ionotropic, N-methyl D-aspartate 2B [Source:HGNC Symbol;Acc:4586]              |  |
| <b>GRIN3A</b>  | Glutamate receptor, ionotropic, N-methyl-D-aspartate 3A [Source:HGNC Symbol;Acc:16767]             |  |
| <b>GRK5</b>    | G protein-coupled receptor kinase 5 [Source:HGNC Symbol;Acc:4544]                                  |  |
| <b>GRM1</b>    | Glutamate receptor, metabotropic 1 [Source:HGNC Symbol;Acc:4593]                                   |  |
| <b>GRM4</b>    | Glutamate receptor, metabotropic 4 [Source:HGNC Symbol;Acc:4596]                                   |  |
| <b>GRM5</b>    | Glutamate receptor, metabotropic 5 [Source:HGNC Symbol;Acc:4597]                                   |  |
| <b>GRM8</b>    | Glutamate receptor, metabotropic 8 [Source:HGNC Symbol;Acc:4600]                                   |  |
| <b>GRN</b>     | Granulin [Source:HGNC Symbol;Acc:4601]                                                             |  |
| <b>GRPEL1</b>  | Grpe-like 1, mitochondrial (E. Coli) [Source:HGNC Symbol;Acc:19696]                                |  |
| <b>GRPEL2</b>  | Grpe-like 2, mitochondrial (E. Coli) [Source:HGNC Symbol;Acc:21060]                                |  |
| <b>GRSF1</b>   | G-rich RNA sequence binding factor 1 [Source:HGNC Symbol;Acc:4610]                                 |  |

|                |                                                                                              |  |
|----------------|----------------------------------------------------------------------------------------------|--|
| <b>GRWD1</b>   | Glutamate-rich WD repeat containing 1 [Source:HGNC Symbol;Acc:21270]                         |  |
| <b>GSDMA</b>   | Gasdermin A [Source:HGNC Symbol;Acc:13311]                                                   |  |
| <b>GSDMC</b>   | Gasdermin C [Source:HGNC Symbol;Acc:7151]                                                    |  |
| <b>GSDMD</b>   | Gasdermin D [Source:HGNC Symbol;Acc:25697]                                                   |  |
| <b>GSG1L</b>   | GSG1-like [Source:HGNC Symbol;Acc:28283]                                                     |  |
| <b>GSK3A</b>   | Glycogen synthase kinase 3 alpha [Source:HGNC Symbol;Acc:4616]                               |  |
| <b>GSN</b>     | Gelsolin [Source:HGNC Symbol;Acc:4620]                                                       |  |
| <b>GSPT1</b>   | G1 to S phase transition 1 [Source:HGNC Symbol;Acc:4621]                                     |  |
| <b>GSPT2</b>   | G1 to S phase transition 2 [Source:HGNC Symbol;Acc:4622]                                     |  |
| <b>GSR</b>     | Glutathione reductase [Source:HGNC Symbol;Acc:4623]                                          |  |
| <b>GSS</b>     | Glutathione synthetase [Source:HGNC Symbol;Acc:4624]                                         |  |
| <b>GSTK1</b>   | Glutathione S-transferase kappa 1 [Source:HGNC Symbol;Acc:16906]                             |  |
| <b>GSTM3</b>   | Glutathione S-transferase mu 3 (brain) [Source:HGNC Symbol;Acc:4635]                         |  |
| <b>GSTM5</b>   | Glutathione S-transferase mu 5 [Source:HGNC Symbol;Acc:4637]                                 |  |
| <b>GSTT1</b>   | Glutathione S-transferase theta 1 [Source:HGNC Symbol;Acc:4641]                              |  |
| <b>GTF2B</b>   | General transcription factor IIB [Source:HGNC Symbol;Acc:4648]                               |  |
| <b>GTF2E1</b>  | General transcription factor IIE, polypeptide 1, alpha 56kda [Source:HGNC Symbol;Acc:4650]   |  |
| <b>GTF2E2</b>  | General transcription factor IIE, polypeptide 2, beta 34kda [Source:HGNC Symbol;Acc:4651]    |  |
| <b>GTF3C1</b>  | General transcription factor IIIC, polypeptide 1, alpha 220kda [Source:HGNC Symbol;Acc:4664] |  |
| <b>GTF3C3</b>  | General transcription factor IIIC, polypeptide 3, 102kda [Source:HGNC Symbol;Acc:4666]       |  |
| <b>GTF3C4</b>  | General transcription factor IIIC, polypeptide 4, 90kda [Source:HGNC Symbol;Acc:4667]        |  |
| <b>GTF3C5</b>  | General transcription factor IIIC, polypeptide 5, 63kda [Source:HGNC Symbol;Acc:4668]        |  |
| <b>GTPBP1</b>  | GTP binding protein 1 [Source:HGNC Symbol;Acc:4669]                                          |  |
| <b>GTPBP2</b>  | GTP binding protein 2 [Source:HGNC Symbol;Acc:4670]                                          |  |
| <b>GUCA1B</b>  | Guanylate cyclase activator 1B (retina) [Source:HGNC Symbol;Acc:4679]                        |  |
| <b>GUCY1A3</b> | Guanylate cyclase 1, soluble, alpha 3 [Source:HGNC Symbol;Acc:4685]                          |  |
| <b>GUCY2F</b>  | Guanylate cyclase 2F, retinal [Source:HGNC Symbol;Acc:4691]                                  |  |

|                |                                                                                                                                                |  |
|----------------|------------------------------------------------------------------------------------------------------------------------------------------------|--|
| <b>GUK1</b>    | Guanylate kinase 1 [Source:HGNC Symbol;Acc:4693]                                                                                               |  |
| <b>GUSB</b>    | Glucuronidase, beta [Source:HGNC Symbol;Acc:4696]                                                                                              |  |
| <b>GXYLT1</b>  | Glucoside xylosyltransferase 1 [Source:HGNC Symbol;Acc:27482]                                                                                  |  |
| <b>GYG2</b>    | Glycogenin 2 [Source:HGNC Symbol;Acc:4700]                                                                                                     |  |
| <b>GYLTL1B</b> | Glycosyltransferase-like 1B [Source:HGNC Symbol;Acc:16522]                                                                                     |  |
| <b>GYPC</b>    | Glycophorin C (Gerbich blood group) [Source:HGNC Symbol;Acc:4704]                                                                              |  |
| <b>GYS2</b>    | Glycogen synthase 2 (liver) [Source:HGNC Symbol;Acc:4707]                                                                                      |  |
| <b>H1F0</b>    | H1 histone family, member 0 [Source:HGNC Symbol;Acc:4714]                                                                                      |  |
| <b>H2AFY</b>   | H2A histone family, member Y [Source:HGNC Symbol;Acc:4740]                                                                                     |  |
| <b>H2AFZ</b>   | H2A histone family, member Z [Source:HGNC Symbol;Acc:4741]                                                                                     |  |
| <b>H6PD</b>    | Hexose-6-phosphate dehydrogenase (glucose 1-dehydrogenase) [Source:HGNC Symbol;Acc:4795]                                                       |  |
| <b>HACL1</b>   | 2-hydroxyacyl-coa lyase 1 [Source:HGNC Symbol;Acc:17856]                                                                                       |  |
| <b>HADHA</b>   | Hydroxyacyl-coa dehydrogenase/3-ketoacyl-coa thiolase/enoyl-coa hydratase (trifunctional protein), alpha subunit [Source:HGNC Symbol;Acc:4801] |  |
| <b>HADHB</b>   | Hydroxyacyl-coa dehydrogenase/3-ketoacyl-coa thiolase/enoyl-coa hydratase (trifunctional protein), beta subunit [Source:HGNC Symbol;Acc:4803]  |  |
| <b>HAMP</b>    | Hepcidin antimicrobial peptide [Source:HGNC Symbol;Acc:15598]                                                                                  |  |
| <b>HAND2</b>   | Heart and neural crest derivatives expressed 2 [Source:HGNC Symbol;Acc:4808]                                                                   |  |
| <b>HAO1</b>    | Hydroxyacid oxidase (glycolate oxidase) 1 [Source:HGNC Symbol;Acc:4809]                                                                        |  |
| <b>HAPLN1</b>  | Hyaluronan and proteoglycan link protein 1 [Source:HGNC Symbol;Acc:2380]                                                                       |  |
| <b>HARS</b>    | Histidyl-trna synthetase [Source:HGNC Symbol;Acc:4816]                                                                                         |  |
| <b>HARS2</b>   | Histidyl-trna synthetase 2, mitochondrial (putative) [Source:HGNC Symbol;Acc:4817]                                                             |  |
| <b>HAS3</b>    | Hyaluronan synthase 3 [Source:HGNC Symbol;Acc:4820]                                                                                            |  |
| <b>HAUS3</b>   | HAUS augmin-like complex, subunit 3 [Source:HGNC Symbol;Acc:28719]                                                                             |  |
| <b>HAUS4</b>   | HAUS augmin-like complex, subunit 4 [Source:HGNC Symbol;Acc:20163]                                                                             |  |
| <b>HAUS5</b>   | HAUS augmin-like complex, subunit 5 [Source:HGNC Symbol;Acc:29130]                                                                             |  |

|                |                                                                                                        |  |
|----------------|--------------------------------------------------------------------------------------------------------|--|
| <b>HAUS6</b>   | HAUS augmin-like complex, subunit 6 [Source:HGNC Symbol;Acc:25948]                                     |  |
| <b>HBEGF</b>   | Heparin-binding EGF-like growth factor [Source:HGNC Symbol;Acc:3059]                                   |  |
| <b>HBXIP</b>   | Hepatitis B virus x interacting protein [Source:HGNC Symbol;Acc:17955]                                 |  |
| <b>HCN2</b>    | Hyperpolarization activated cyclic nucleotide-gated potassium channel 2 [Source:HGNC Symbol;Acc:4846]  |  |
| <b>HCN3</b>    | Hyperpolarization activated cyclic nucleotide-gated potassium channel 3 [Source:HGNC Symbol;Acc:19183] |  |
| <b>HCN4</b>    | Hyperpolarization activated cyclic nucleotide-gated potassium channel 4 [Source:HGNC Symbol;Acc:16882] |  |
| <b>HDAC10</b>  | Histone deacetylase 10 [Source:HGNC Symbol;Acc:18128]                                                  |  |
| <b>HDAC2</b>   | Histone deacetylase 2 [Source:HGNC Symbol;Acc:4853]                                                    |  |
| <b>HDAC4</b>   | Histone deacetylase 4 [Source:HGNC Symbol;Acc:14063]                                                   |  |
| <b>HDAC5</b>   | Histone deacetylase 5 [Source:HGNC Symbol;Acc:14068]                                                   |  |
| <b>HDAC6</b>   | Histone deacetylase 6 [Source:HGNC Symbol;Acc:14064]                                                   |  |
| <b>HDAC7</b>   | Histone deacetylase 7 [Source:HGNC Symbol;Acc:14067]                                                   |  |
| <b>HDAC8</b>   | Histone deacetylase 8 [Source:HGNC Symbol;Acc:13315]                                                   |  |
| <b>HDAC9</b>   | Histone deacetylase 9 [Source:HGNC Symbol;Acc:14065]                                                   |  |
| <b>HDHD1</b>   | Haloacid dehalogenase-like hydrolase domain containing 1 [Source:HGNC Symbol;Acc:16818]                |  |
| <b>HDHD2</b>   | Haloacid dehalogenase-like hydrolase domain containing 2 [Source:HGNC Symbol;Acc:25364]                |  |
| <b>HEATR1</b>  | HEAT repeat containing 1 [Source:HGNC Symbol;Acc:25517]                                                |  |
| <b>HEATR2</b>  | HEAT repeat containing 2 [Source:HGNC Symbol;Acc:26013]                                                |  |
| <b>HEATR5A</b> | HEAT repeat containing 5A [Source:HGNC Symbol;Acc:20276]                                               |  |
| <b>HEATR6</b>  | HEAT repeat containing 6 [Source:HGNC Symbol;Acc:24076]                                                |  |
| <b>HEATR7A</b> | HEAT repeat containing 7A [Source:HGNC Symbol;Acc:26958]                                               |  |
| <b>HECTD3</b>  | HECT domain containing 3 [Source:HGNC Symbol;Acc:26117]                                                |  |
| <b>HEG1</b>    | HEG homolog 1 (zebrafish) [Source:HGNC Symbol;Acc:29227]                                               |  |
| <b>HELB</b>    | Helicase (DNA) B [Source:HGNC Symbol;Acc:17196]                                                        |  |
| <b>HELLS</b>   | Helicase, lymphoid-specific [Source:HGNC Symbol;Acc:4861]                                              |  |
| <b>HELZ</b>    | Helicase with zinc finger [Source:HGNC Symbol;Acc:16878]                                               |  |
| <b>HEMK1</b>   | Hemk methyltransferase family member 1 [Source:HGNC Symbol;Acc:24923]                                  |  |

|                |                                                                                                                                   |   |
|----------------|-----------------------------------------------------------------------------------------------------------------------------------|---|
| <b>HENMT1</b>  | HEN1 methyltransferase homolog 1 (Arabidopsis) [Source:HGNC Symbol;Acc:26400]                                                     |   |
| <b>HEPH</b>    | Hephaestin [Source:HGNC Symbol;Acc:4866]                                                                                          |   |
| <b>HERC1</b>   | Hect (homologous to the E6-AP (UBE3A) carboxyl terminus) domain and RCC1 (CHC1)-like domain (RLD) 1 [Source:HGNC Symbol;Acc:4867] |   |
| <b>HERC2</b>   | Hect domain and RLD 2 [Source:HGNC Symbol;Acc:4868]                                                                               |   |
| <b>HERC4</b>   | Hect domain and RLD 4 [Source:HGNC Symbol;Acc:24521]                                                                              |   |
| <b>HERC6</b>   | Hect domain and RLD 6 [Source:HGNC Symbol;Acc:26072]                                                                              |   |
| <b>HERPUD1</b> | Homocysteine-inducible, endoplasmic reticulum stress-inducible, ubiquitin-like domain member 1                                    | √ |
| <b>HERPUD1</b> | Homocysteine-inducible, endoplasmic reticulum stress-inducible, ubiquitin-like domain member 1 [Source:HGNC Symbol;Acc:13744]     |   |
| <b>HEXB</b>    | Hexosaminidase B (beta polypeptide) [Source:HGNC Symbol;Acc:4879]                                                                 |   |
| <b>HEXIM1</b>  | Hexamethylene bis-acetamide inducible 1 [Source:HGNC Symbol;Acc:24953]                                                            |   |
| <b>HEYL</b>    | Hairy/enhancer-of-split related with YRPW motif-like [Source:HGNC Symbol;Acc:4882]                                                |   |
| <b>HFE</b>     | Hemochromatosis [Source:HGNC Symbol;Acc:4886]                                                                                     |   |
| <b>HGF</b>     | Hepatocyte growth factor (hepapoietin A; scatter factor) [Source:HGNC Symbol;Acc:4893]                                            |   |
| <b>HGSNAT</b>  | Heparan-alpha-glucosaminide N-acetyltransferase [Source:HGNC Symbol;Acc:26527]                                                    |   |
| <b>HHAT</b>    | Hedgehog acyltransferase [Source:HGNC Symbol;Acc:18270]                                                                           |   |
| <b>HHIP</b>    | Hedgehog interacting protein [Source:HGNC Symbol;Acc:14866]                                                                       |   |
| <b>HHIPL2</b>  | HHIP-like 2 [Source:HGNC Symbol;Acc:25842]                                                                                        |   |
| <b>HHLA1</b>   | HERV-H LTR-associating 1 [Source:HGNC Symbol;Acc:4904]                                                                            |   |
| <b>HHLA2</b>   | HERV-H LTR-associating 2 [Source:HGNC Symbol;Acc:4905]                                                                            |   |
| <b>HIAT1</b>   | Hippocampus abundant transcript 1 [Source:HGNC Symbol;Acc:23363]                                                                  |   |
| <b>HIC1</b>    | Hypermethylated in cancer 1 [Source:HGNC Symbol;Acc:4909]                                                                         |   |
| <b>HIC2</b>    | Hypermethylated in cancer 2 [Source:HGNC Symbol;Acc:18595]                                                                        |   |
| <b>HIF1AN</b>  | Hypoxia inducible factor 1, alpha subunit inhibitor [Source:HGNC Symbol;Acc:17113]                                                |   |

|                 |                                                                                                              |   |
|-----------------|--------------------------------------------------------------------------------------------------------------|---|
| <b>HIF3A</b>    | Hypoxia inducible factor 3, alpha subunit [Source:HGNC Symbol;Acc:15825]                                     |   |
| <b>HIGD2A</b>   | HIG1 hypoxia inducible domain family, member 2A [Source:HGNC Symbol;Acc:28311]                               |   |
| <b>HINT1</b>    | Histidine triad nucleotide binding protein 1 [Source:HGNC Symbol;Acc:4912]                                   |   |
| <b>HINT3</b>    | Histidine triad nucleotide binding protein 3 [Source:HGNC Symbol;Acc:18468]                                  |   |
| <b>HIP1</b>     | Huntingtin interacting protein 1                                                                             | √ |
| <b>HIPK1</b>    | Homeodomain interacting protein kinase 1 [Source:HGNC Symbol;Acc:19006]                                      |   |
| <b>HIPK2</b>    | Homeodomain interacting protein kinase 2 [Source:HGNC Symbol;Acc:14402]                                      |   |
| <b>HIPK4</b>    | Homeodomain interacting protein kinase 4 [Source:HGNC Symbol;Acc:19007]                                      |   |
| <b>HIRA</b>     | HIR histone cell cycle regulation defective homolog A ( <i>S. Cerevisiae</i> ) [Source:HGNC Symbol;Acc:4916] |   |
| <b>HIST1H4A</b> | Histone cluster 1, H4a [Source:HGNC Symbol;Acc:4781]                                                         |   |
| <b>HIST1H4E</b> | Histone cluster 1, H4e [Source:HGNC Symbol;Acc:4790]                                                         |   |
| <b>HIST1H4F</b> | Histone cluster 1, H4f [Source:HGNC Symbol;Acc:4783]                                                         |   |
| <b>HIST1H4H</b> | Histone cluster 1, H4h [Source:HGNC Symbol;Acc:4788]                                                         |   |
| <b>HIST2H3A</b> | Histone cluster 2, H3a [Source:HGNC Symbol;Acc:20505]                                                        |   |
| <b>HIST2H3C</b> | Histone cluster 2, H3c [Source:HGNC Symbol;Acc:20503]                                                        |   |
| <b>HIST2H4A</b> | Histone cluster 2, H4a [Source:HGNC Symbol;Acc:4794]                                                         |   |
| <b>HIST2H4B</b> | Histone cluster 2, H4b [Source:HGNC Symbol;Acc:29607]                                                        |   |
| <b>HIST4H4</b>  | Histone cluster 4, H4 [Source:HGNC Symbol;Acc:20510]                                                         |   |
| <b>HIVEP1</b>   | Human immunodeficiency virus type I enhancer binding protein 1 [Source:HGNC Symbol;Acc:4920]                 |   |
| <b>HIVEP2</b>   | Human immunodeficiency virus type I enhancer binding protein 2 [Source:HGNC Symbol;Acc:4921]                 |   |
| <b>HIVEP3</b>   | Human immunodeficiency virus type I enhancer binding protein 3 [Source:HGNC Symbol;Acc:13561]                |   |
| <b>HKDC1</b>    | Hexokinase domain containing 1 [Source:HGNC Symbol;Acc:23302]                                                |   |

|                 |                                                                                                                        |   |
|-----------------|------------------------------------------------------------------------------------------------------------------------|---|
| <b>HLA-DMB</b>  | Major histocompatibility complex, class II, DM beta [Source:HGNC Symbol;Acc:4935]                                      |   |
| <b>HLA-DOA</b>  | Major histocompatibility complex, class II, DO alpha [Source:HGNC Symbol;Acc:4936]                                     |   |
| <b>HLA-DPB1</b> | Major histocompatibility complex, class II, DP beta 1 [Source:HGNC Symbol;Acc:4940]                                    |   |
| <b>HLA-DQA2</b> | Major histocompatibility complex, class II, DQ alpha 2 [Source:HGNC Symbol;Acc:4943]                                   |   |
| <b>HLA-E</b>    | Major histocompatibility complex, class I, E [Source:HGNC Symbol;Acc:4962]                                             |   |
| <b>HLA-G</b>    | Major histocompatibility complex, class I, G [Source:HGNC Symbol;Acc:4964]                                             |   |
| <b>HLA-L</b>    | Major histocompatibility complex, class I, L, pseudogene [Source:HGNC Symbol;Acc:4970]                                 |   |
| <b>HLCS</b>     | Holocarboxylase synthetase (biotin-(propionyl-coa-carboxylase (ATP-hydrolysing)) ligase) [Source:HGNC Symbol;Acc:4976] |   |
| <b>HLTF</b>     | Helicase-like transcription factor [Source:HGNC Symbol;Acc:11099]                                                      |   |
| <b>HLX</b>      | H2.0-like homeobox [Source:HGNC Symbol;Acc:4978]                                                                       |   |
| <b>HMBOX1</b>   | Homeobox containing 1 [Source:HGNC Symbol;Acc:26137]                                                                   |   |
| <b>HMCN1</b>    | Hemicentin 1 [Source:HGNC Symbol;Acc:19194]                                                                            |   |
| <b>HMGA1</b>    | High mobility group AT-hook 1                                                                                          | √ |
| <b>HMGA2</b>    | High mobility group AT-hook 2                                                                                          | √ |
| <b>HMGB1</b>    | High-mobility group box 1 [Source:HGNC Symbol;Acc:4983]                                                                |   |
| <b>HMGB2</b>    | High-mobility group box 2 [Source:HGNC Symbol;Acc:5000]                                                                |   |
| <b>HMGB3</b>    | High-mobility group box 3 [Source:HGNC Symbol;Acc:5004]                                                                |   |
| <b>HMGB4</b>    | High-mobility group box 4 [Source:HGNC Symbol;Acc:24954]                                                               |   |
| <b>HMGCR</b>    | 3-hydroxy-3-methylglutaryl-coa reductase [Source:HGNC Symbol;Acc:5006]                                                 |   |
| <b>HMHA1</b>    | Histocompatibility (minor) HA-1 [Source:HGNC Symbol;Acc:17102]                                                         |   |
| <b>HNF1A</b>    | HNF1 homeobox A [Source:HGNC Symbol;Acc:11621]                                                                         |   |
| <b>HNF4A</b>    | Hepatocyte nuclear factor 4, alpha [Source:HGNC Symbol;Acc:5024]                                                       |   |
| <b>HNF4G</b>    | Hepatocyte nuclear factor 4, gamma [Source:HGNC Symbol;Acc:5026]                                                       |   |

|                |                                                                                                        |   |
|----------------|--------------------------------------------------------------------------------------------------------|---|
| <b>HNRNPF</b>  | Heterogeneous nuclear ribonucleoprotein F [Source:HGNC Symbol;Acc:5039]                                |   |
| <b>HNRNPH1</b> | Heterogeneous nuclear ribonucleoprotein H1 (H) [Source:HGNC Symbol;Acc:5041]                           |   |
| <b>HNRNPH2</b> | Heterogeneous nuclear ribonucleoprotein H2 (H') [Source:HGNC Symbol;Acc:5042]                          |   |
| <b>HNRNPK</b>  | Heterogeneous nuclear ribonucleoprotein K [Source:HGNC Symbol;Acc:5044]                                |   |
| <b>HNRNPR</b>  | Heterogeneous nuclear ribonucleoprotein R [Source:HGNC Symbol;Acc:5047]                                |   |
| <b>HNRNPU</b>  | Heterogeneous nuclear ribonucleoprotein U (scaffold attachment factor A) [Source:HGNC Symbol;Acc:5048] |   |
| <b>HNRPLL</b>  | Heterogeneous nuclear ribonucleoprotein L-like [Source:HGNC Symbol;Acc:25127]                          |   |
| <b>HOMER1</b>  | Homer homolog 1 (Drosophila) [Source:HGNC Symbol;Acc:17512]                                            |   |
| <b>HOOK1</b>   | Hook homolog 1 (Drosophila) [Source:HGNC Symbol;Acc:19884]                                             |   |
| <b>HOXA1</b>   | Homeobox A1 [Source:HGNC Symbol;Acc:5099]                                                              |   |
| <b>HOXA7</b>   | Homeobox A7 [Source:HGNC Symbol;Acc:5108]                                                              |   |
| <b>HOXB4</b>   | Homeobox B4 [Source:HGNC Symbol;Acc:5115]                                                              |   |
| <b>HOXB5</b>   | Homeobox B5 [Source:HGNC Symbol;Acc:5116]                                                              |   |
| <b>HOXC10</b>  | Homeobox C10 [Source:HGNC Symbol;Acc:5122]                                                             |   |
| <b>HOXC6</b>   | Homeobox C6 [Source:HGNC Symbol;Acc:5128]                                                              |   |
| <b>HOXD10</b>  | Homeobox D10 [Source:HGNC Symbol;Acc:5133]                                                             |   |
| <b>HOXD8</b>   | Homeobox D8 [Source:HGNC Symbol;Acc:5139]                                                              |   |
| <b>HOXD9</b>   | Homeobox D9 [Source:HGNC Symbol;Acc:5140]                                                              |   |
| <b>HPCAL4</b>  | Hippocalcin like 4 [Source:HGNC Symbol;Acc:18212]                                                      |   |
| <b>HPS3</b>    | Hermansky-Pudlak syndrome 3 [Source:HGNC Symbol;Acc:15597]                                             |   |
| <b>HPX</b>     | Hemopexin [Source:HGNC Symbol;Acc:5171]                                                                |   |
| <b>HR</b>      | Hairless homolog (mouse) [Source:HGNC Symbol;Acc:5172]                                                 |   |
| <b>HRAS</b>    | V-Ha-ras Harvey rat sarcoma viral oncogene homolog                                                     | √ |
| <b>HRH4</b>    | Histamine receptor H4 [Source:HGNC Symbol;Acc:17383]                                                   |   |
| <b>HS2ST1</b>  | Heparan sulfate 2-O-sulfotransferase 1 [Source:HGNC Symbol;Acc:5193]                                   |   |



|                 |                                                                                                   |  |
|-----------------|---------------------------------------------------------------------------------------------------|--|
| <b>HS3ST1</b>   | Heparan sulfate (glucosamine) 3-O-sulfotransferase 1 [Source:HGNC Symbol;Acc:5194]                |  |
| <b>HS3ST3B1</b> | Heparan sulfate (glucosamine) 3-O-sulfotransferase 3B1 [Source:HGNC Symbol;Acc:5198]              |  |
| <b>HSD11B1L</b> | Hydroxysteroid (11-beta) dehydrogenase 1-like [Source:HGNC Symbol;Acc:30419]                      |  |
| <b>HSD17B2</b>  | Hydroxysteroid (17-beta) dehydrogenase 2 [Source:HGNC Symbol;Acc:5211]                            |  |
| <b>HSD17B6</b>  | Hydroxysteroid (17-beta) dehydrogenase 6 homolog (mouse) [Source:HGNC Symbol;Acc:23316]           |  |
| <b>HSD17B7</b>  | Hydroxysteroid (17-beta) dehydrogenase 7 [Source:HGNC Symbol;Acc:5215]                            |  |
| <b>HSDL2</b>    | Hydroxysteroid dehydrogenase like 2 [Source:HGNC Symbol;Acc:18572]                                |  |
| <b>HSP90AB1</b> | Heat shock protein 90kda alpha (cytosolic), class B member 1 [Source:HGNC Symbol;Acc:5258]        |  |
| <b>HSPA12A</b>  | Heat shock 70kda protein 12A [Source:HGNC Symbol;Acc:19022]                                       |  |
| <b>HSPA12B</b>  | Heat shock 70kd protein 12B [Source:HGNC Symbol;Acc:16193]                                        |  |
| <b>HSPA13</b>   | Heat shock protein 70kda family, member 13 [Source:HGNC Symbol;Acc:11375]                         |  |
| <b>HSPA14</b>   | Heat shock 70kda protein 14 [Source:HGNC Symbol;Acc:29526]                                        |  |
| <b>HSPA1L</b>   | Heat shock 70kda protein 1-like [Source:HGNC Symbol;Acc:5234]                                     |  |
| <b>HSPA4</b>    | Heat shock 70kda protein 4 [Source:HGNC Symbol;Acc:5237]                                          |  |
| <b>HSPA4L</b>   | Heat shock 70kda protein 4-like [Source:HGNC Symbol;Acc:17041]                                    |  |
| <b>HSPA8</b>    | Heat shock 70kda protein 8 [Source:HGNC Symbol;Acc:5241]                                          |  |
| <b>HSPB1</b>    | Heat shock 27kda protein 1 [Source:HGNC Symbol;Acc:5246]                                          |  |
| <b>HSPB11</b>   | Heat shock protein family B (small), member 11 [Source:HGNC Symbol;Acc:25019]                     |  |
| <b>HSPB3</b>    | Heat shock 27kda protein 3 [Source:HGNC Symbol;Acc:5248]                                          |  |
| <b>HSPB9</b>    | Heat shock protein, alpha-crystallin-related, B9 [Source:HGNC Symbol;Acc:30589]                   |  |
| <b>HSPBP1</b>   | HSPA (heat shock 70kda) binding protein, cytoplasmic cochaperone 1 [Source:HGNC Symbol;Acc:24989] |  |

|              |                                                                                                      |  |
|--------------|------------------------------------------------------------------------------------------------------|--|
| <b>HSPD1</b> | Heat shock 60kda protein 1 (chaperonin) [Source:HGNC Symbol;Acc:5261]                                |  |
| <b>HSPG2</b> | Heparan sulfate proteoglycan 2 [Source:HGNC Symbol;Acc:5273]                                         |  |
| <b>HSPH1</b> | Heat shock 105kda/110kda protein 1 [Source:HGNC Symbol;Acc:16969]                                    |  |
| <b>HTR1D</b> | 5-hydroxytryptamine (serotonin) receptor 1D [Source:HGNC Symbol;Acc:5289]                            |  |
| <b>HTR1F</b> | 5-hydroxytryptamine (serotonin) receptor 1F [Source:HGNC Symbol;Acc:5292]                            |  |
| <b>HTR2A</b> | 5-hydroxytryptamine (serotonin) receptor 2A [Source:HGNC Symbol;Acc:5293]                            |  |
| <b>HTR2C</b> | 5-hydroxytryptamine (serotonin) receptor 2C [Source:HGNC Symbol;Acc:5295]                            |  |
| <b>HTR3A</b> | 5-hydroxytryptamine (serotonin) receptor 3A [Source:HGNC Symbol;Acc:5297]                            |  |
| <b>HTR7</b>  | 5-hydroxytryptamine (serotonin) receptor 7 (adenylate cyclase-coupled) [Source:HGNC Symbol;Acc:5302] |  |
| <b>HTT</b>   | Huntingtin [Source:HGNC Symbol;Acc:4851]                                                             |  |
| <b>HUNK</b>  | Hormonally up-regulated Neu-associated kinase [Source:HGNC Symbol;Acc:13326]                         |  |
| <b>HUWE1</b> | HECT, UBA and WWE domain containing 1 [Source:HGNC Symbol;Acc:30892]                                 |  |
| <b>HVCN1</b> | Hydrogen voltage-gated channel 1 [Source:HGNC Symbol;Acc:28240]                                      |  |
| <b>HYAL2</b> | Hyaluronoglucosaminidase 2 [Source:HGNC Symbol;Acc:5321]                                             |  |
| <b>HYDIN</b> | Hydrocephalus inducing homolog (mouse) [Source:HGNC Symbol;Acc:19368]                                |  |
| <b>HYI</b>   | Hydroxypyruvate isomerase (putative) [Source:HGNC Symbol;Acc:26948]                                  |  |
| <b>HYOU1</b> | Hypoxia up-regulated 1 [Source:HGNC Symbol;Acc:16931]                                                |  |
| <b>IAH1</b>  | Isoamyl acetate-hydrolyzing esterase 1 homolog (S. Cerevisiae) [Source:HGNC Symbol;Acc:27696]        |  |
| <b>IAPP</b>  | Islet amyloid polypeptide [Source:HGNC Symbol;Acc:5329]                                              |  |
| <b>IARS</b>  | Isoleucyl-trna synthetase [Source:HGNC Symbol;Acc:5330]                                              |  |
| <b>IARS2</b> | Isoleucyl-trna synthetase 2, mitochondrial [Source:HGNC Symbol;Acc:29685]                            |  |

|               |                                                                                                      |   |
|---------------|------------------------------------------------------------------------------------------------------|---|
| <b>ICA1</b>   | Islet cell autoantigen 1, 69kda [Source:HGNC Symbol;Acc:5343]                                        |   |
| <b>ICAM2</b>  | Intercellular adhesion molecule 2 [Source:HGNC Symbol;Acc:5345]                                      |   |
| <b>ICAM3</b>  | Intercellular adhesion molecule 3 [Source:HGNC Symbol;Acc:5346]                                      |   |
| <b>ICAM4</b>  | Intercellular adhesion molecule 4 (Landsteiner-Wiener blood group) [Source:HGNC Symbol;Acc:5347]     |   |
| <b>ICK</b>    | Intestinal cell (MAK-like) kinase [Source:HGNC Symbol;Acc:21219]                                     |   |
| <b>ICOSLG</b> | Inducible T-cell co-stimulator ligand [Source:HGNC Symbol;Acc:17087]                                 |   |
| <b>ID4</b>    | Inhibitor of DNA binding 4, dominant negative helix-loop-helix protein [Source:HGNC Symbol;Acc:5363] |   |
| <b>IDE</b>    | Insulin-degrading enzyme [Source:HGNC Symbol;Acc:5381]                                               |   |
| <b>IDH1</b>   | Isocitrate dehydrogenase 1 (NADP <sup>+</sup> ), soluble                                             | √ |
| <b>IDH2</b>   | Isocitrate dehydrogenase 2 (NADP <sup>+</sup> ), mitochondrial                                       | √ |
| <b>IDH3B</b>  | Isocitrate dehydrogenase 3 (NAD <sup>+</sup> ) beta [Source:HGNC Symbol;Acc:5385]                    |   |
| <b>IDI1</b>   | Isopentenyl-diphosphate delta isomerase 1 [Source:HGNC Symbol;Acc:5387]                              |   |
| <b>IDS</b>    | Iduronate 2-sulfatase [Source:HGNC Symbol;Acc:5389]                                                  |   |
| <b>IDUA</b>   | Iduronidase, alpha-L- [Source:HGNC Symbol;Acc:5391]                                                  |   |
| <b>IFFO1</b>  | Intermediate filament family orphan 1 [Source:HGNC Symbol;Acc:24970]                                 |   |
| <b>IFI30</b>  | Interferon, gamma-inducible protein 30 [Source:HGNC Symbol;Acc:5398]                                 |   |
| <b>IFI44</b>  | Interferon-induced protein 44 [Source:HGNC Symbol;Acc:16938]                                         |   |
| <b>IFNA1</b>  | Interferon, alpha 1 [Source:HGNC Symbol;Acc:5417]                                                    |   |
| <b>IFNA2</b>  | Interferon, alpha 2 [Source:HGNC Symbol;Acc:5423]                                                    |   |
| <b>IFNA21</b> | Interferon, alpha 21 [Source:HGNC Symbol;Acc:5424]                                                   |   |
| <b>IFNA5</b>  | Interferon, alpha 5 [Source:HGNC Symbol;Acc:5426]                                                    |   |
| <b>IFNA6</b>  | Interferon, alpha 6 [Source:HGNC Symbol;Acc:5427]                                                    |   |
| <b>IFNA8</b>  | Interferon, alpha 8 [Source:HGNC Symbol;Acc:5429]                                                    |   |
| <b>IFNAR1</b> | Interferon (alpha, beta and omega) receptor 1 [Source:HGNC Symbol;Acc:5432]                          |   |
| <b>IFNAR2</b> | Interferon (alpha, beta and omega) receptor 2 [Source:HGNC Symbol;Acc:5433]                          |   |
| <b>IFNB1</b>  | Interferon, beta 1, fibroblast [Source:HGNC Symbol;Acc:5434]                                         |   |
| <b>IFNGR1</b> | Interferon gamma receptor 1 [Source:HGNC Symbol;Acc:5439]                                            |   |

|                |                                                                                     |  |
|----------------|-------------------------------------------------------------------------------------|--|
| <b>IFT140</b>  | Intraflagellar transport 140 homolog (Chlamydomonas) [Source:HGNC Symbol;Acc:29077] |  |
| <b>IFT172</b>  | Intraflagellar transport 172 homolog (Chlamydomonas) [Source:HGNC Symbol;Acc:30391] |  |
| <b>IFT20</b>   | Intraflagellar transport 20 homolog (Chlamydomonas) [Source:HGNC Symbol;Acc:30989]  |  |
| <b>IFT46</b>   | Intraflagellar transport 46 homolog (Chlamydomonas) [Source:HGNC Symbol;Acc:26146]  |  |
| <b>IFT57</b>   | Intraflagellar transport 57 homolog (Chlamydomonas) [Source:HGNC Symbol;Acc:17367]  |  |
| <b>IFT80</b>   | Intraflagellar transport 80 homolog (Chlamydomonas) [Source:HGNC Symbol;Acc:29262]  |  |
| <b>IFT81</b>   | Intraflagellar transport 81 homolog (Chlamydomonas) [Source:HGNC Symbol;Acc:14313]  |  |
| <b>IGDCC4</b>  | Immunoglobulin superfamily, DCC subclass, member 4 [Source:HGNC Symbol;Acc:13770]   |  |
| <b>IGF1R</b>   | Insulin-like growth factor 1 receptor [Source:HGNC Symbol;Acc:5465]                 |  |
| <b>IGF2</b>    | Insulin-like growth factor 2 (somatomedin A) [Source:HGNC Symbol;Acc:5466]          |  |
| <b>IGF2BP1</b> | Insulin-like growth factor 2 mrna binding protein 1 [Source:HGNC Symbol;Acc:28866]  |  |
| <b>IGF2BP2</b> | Insulin-like growth factor 2 mrna binding protein 2 [Source:HGNC Symbol;Acc:28867]  |  |
| <b>IGF2BP3</b> | Insulin-like growth factor 2 mrna binding protein 3 [Source:HGNC Symbol;Acc:28868]  |  |
| <b>IGF2R</b>   | Insulin-like growth factor 2 receptor [Source:HGNC Symbol;Acc:5467]                 |  |
| <b>IGFBP4</b>  | Insulin-like growth factor binding protein 4 [Source:HGNC Symbol;Acc:5473]          |  |
| <b>IGKC</b>    | Immunoglobulin kappa constant [Source:HGNC Symbol;Acc:5716]                         |  |
| <b>IGKV4-1</b> | Immunoglobulin kappa variable 4-1 [Source:HGNC Symbol;Acc:5834]                     |  |
| <b>IGLC1</b>   | Immunoglobulin lambda constant 1 (Mcg marker) [Source:HGNC Symbol;Acc:5855]         |  |

|                 |                                                                                                                                         |  |
|-----------------|-----------------------------------------------------------------------------------------------------------------------------------------|--|
| <b>IGLC2</b>    | Immunoglobulin lambda constant 2 (Kern-Oz- marker) [Source:HGNC Symbol;Acc:5856]                                                        |  |
| <b>IGLC3</b>    | Immunoglobulin lambda constant 3 (Kern-Oz+ marker) [Source:HGNC Symbol;Acc:5857]                                                        |  |
| <b>IGLV5-37</b> | Immunoglobulin lambda variable 5-37 [Source:HGNC Symbol;Acc:5922]                                                                       |  |
| <b>IGLV5-45</b> | Immunoglobulin lambda variable 5-45 [Source:HGNC Symbol;Acc:5924]                                                                       |  |
| <b>IGLV5-52</b> | Immunoglobulin lambda variable 5-52 [Source:HGNC Symbol;Acc:5926]                                                                       |  |
| <b>IGSF1</b>    | Immunoglobulin superfamily, member 1 [Source:HGNC Symbol;Acc:5948]                                                                      |  |
| <b>IGSF11</b>   | Immunoglobulin superfamily, member 11 [Source:HGNC Symbol;Acc:16669]                                                                    |  |
| <b>IGSF22</b>   | Immunoglobulin superfamily, member 22 [Source:HGNC Symbol;Acc:26750]                                                                    |  |
| <b>IGSF3</b>    | Immunoglobulin superfamily, member 3 [Source:HGNC Symbol;Acc:5950]                                                                      |  |
| <b>IKBKAP</b>   | Inhibitor of kappa light polypeptide gene enhancer in B-cells, kinase complex-associated protein [Source:HGNC Symbol;Acc:5959]          |  |
| <b>IKBKE</b>    | Inhibitor of kappa light polypeptide gene enhancer in B-cells, kinase epsilon [Source:HGNC Symbol;Acc:14552]                            |  |
| <b>IKZF5</b>    | IKAROS family zinc finger 5 (Pegasus) [Source:HGNC Symbol;Acc:14283]                                                                    |  |
| <b>IL10</b>     | Interleukin 10 [Source:HGNC Symbol;Acc:5962]                                                                                            |  |
| <b>IL12A</b>    | Interleukin 12A (natural killer cell stimulatory factor 1, cytotoxic lymphocyte maturation factor 1, p35) [Source:HGNC Symbol;Acc:5969] |  |
| <b>IL12RB2</b>  | Interleukin 12 receptor, beta 2 [Source:HGNC Symbol;Acc:5972]                                                                           |  |
| <b>IL13RA1</b>  | Interleukin 13 receptor, alpha 1 [Source:HGNC Symbol;Acc:5974]                                                                          |  |
| <b>IL15</b>     | Interleukin 15 [Source:HGNC Symbol;Acc:5977]                                                                                            |  |
| <b>IL17B</b>    | Interleukin 17B [Source:HGNC Symbol;Acc:5982]                                                                                           |  |
| <b>IL17RA</b>   | Interleukin 17 receptor A [Source:HGNC Symbol;Acc:5985]                                                                                 |  |
| <b>IL17REL</b>  | Interleukin 17 receptor E-like [Source:HGNC Symbol;Acc:33808]                                                                           |  |
| <b>IL18</b>     | Interleukin 18 (interferon-gamma-inducing factor) [Source:HGNC Symbol;Acc:5986]                                                         |  |
| <b>IL18R1</b>   | Interleukin 18 receptor 1 [Source:HGNC Symbol;Acc:5988]                                                                                 |  |
| <b>IL19</b>     | Interleukin 19 [Source:HGNC Symbol;Acc:5990]                                                                                            |  |
| <b>IL1B</b>     | Interleukin 1, beta [Source:HGNC Symbol;Acc:5992]                                                                                       |  |
| <b>IL1R1</b>    | Interleukin 1 receptor, type I [Source:HGNC Symbol;Acc:5993]                                                                            |  |

|                 |                                                                                 |   |
|-----------------|---------------------------------------------------------------------------------|---|
| <b>IL1R2</b>    | Interleukin 1 receptor, type II [Source:HGNC Symbol;Acc:5994]                   |   |
| <b>IL1RAPL2</b> | Interleukin 1 receptor accessory protein-like 2 [Source:HGNC Symbol;Acc:5997]   |   |
| <b>IL20RB</b>   | Interleukin 20 receptor beta [Source:HGNC Symbol;Acc:6004]                      |   |
| <b>IL28B</b>    | Interleukin 28B (interferon, lambda 3) [Source:HGNC Symbol;Acc:18365]           |   |
| <b>IL2RA</b>    | Interleukin 2 receptor, alpha [Source:HGNC Symbol;Acc:6008]                     |   |
| <b>IL2RB</b>    | Interleukin 2 receptor, beta [Source:HGNC Symbol;Acc:6009]                      |   |
| <b>IL2RG</b>    | Interleukin 2 receptor, gamma [Source:HGNC Symbol;Acc:6010]                     |   |
| <b>IL31RA</b>   | Interleukin 31 receptor A [Source:HGNC Symbol;Acc:18969]                        |   |
| <b>IL33</b>     | Interleukin 33 [Source:HGNC Symbol;Acc:16028]                                   |   |
| <b>IL4R</b>     | Interleukin 4 receptor [Source:HGNC Symbol;Acc:6015]                            |   |
| <b>IL6R</b>     | Interleukin 6 receptor [Source:HGNC Symbol;Acc:6019]                            |   |
| <b>IL6ST</b>    | Interleukin 6 signal transducer (gp130, oncostatin M receptor)                  | √ |
| <b>IL7R</b>     | Interleukin 7 receptor                                                          | √ |
| <b>IL9R</b>     | Interleukin 9 receptor [Source:HGNC Symbol;Acc:6030]                            |   |
| <b>ILDR1</b>    | Immunoglobulin-like domain containing receptor 1 [Source:HGNC Symbol;Acc:28741] |   |
| <b>ILDR2</b>    | Immunoglobulin-like domain containing receptor 2 [Source:HGNC Symbol;Acc:18131] |   |
| <b>ILVBL</b>    | Ilvb (bacterial acetolactate synthase)-like [Source:HGNC Symbol;Acc:6041]       |   |
| <b>IMMT</b>     | Inner membrane protein, mitochondrial [Source:HGNC Symbol;Acc:6047]             |   |
| <b>IMPA1</b>    | Inositol(myo)-1(or 4)-monophosphatase 1 [Source:HGNC Symbol;Acc:6050]           |   |
| <b>IMPDH2</b>   | IMP (inosine 5'-monophosphate) dehydrogenase 2 [Source:HGNC Symbol;Acc:6053]    |   |
| <b>INADL</b>    | Inad-like (Drosophila) [Source:HGNC Symbol;Acc:28881]                           |   |
| <b>INCENP</b>   | Inner centromere protein antigens 135/155kda [Source:HGNC Symbol;Acc:6058]      |   |
| <b>INHBA</b>    | Inhibin, beta A [Source:HGNC Symbol;Acc:6066]                                   |   |
| <b>INHBB</b>    | Inhibin, beta B [Source:HGNC Symbol;Acc:6067]                                   |   |
| <b>INMT</b>     | Indolethylamine N-methyltransferase [Source:HGNC Symbol;Acc:6069]               |   |
| <b>INO80</b>    | INO80 homolog ( <i>S. Cerevisiae</i> ) [Source:HGNC Symbol;Acc:26956]           |   |
| <b>INO80D</b>   | INO80 complex subunit D [Source:HGNC Symbol;Acc:25997]                          |   |

|               |                                                                                            |  |
|---------------|--------------------------------------------------------------------------------------------|--|
| <b>INO80E</b> | INO80 complex subunit E [Source:HGNC Symbol;Acc:26905]                                     |  |
| <b>INPP4B</b> | Inositol polyphosphate-4-phosphatase, type II, 105kda [Source:HGNC Symbol;Acc:6075]        |  |
| <b>INPP5A</b> | Inositol polyphosphate-5-phosphatase, 40kda [Source:HGNC Symbol;Acc:6076]                  |  |
| <b>INPP5B</b> | Inositol polyphosphate-5-phosphatase, 75kda [Source:HGNC Symbol;Acc:6077]                  |  |
| <b>INPP5D</b> | Inositol polyphosphate-5-phosphatase, 145kda [Source:HGNC Symbol;Acc:6079]                 |  |
| <b>INPP5F</b> | Inositol polyphosphate-5-phosphatase F [Source:HGNC Symbol;Acc:17054]                      |  |
| <b>INPPL1</b> | Inositol polyphosphate phosphatase-like 1 [Source:HGNC Symbol;Acc:6080]                    |  |
| <b>INSIG1</b> | Insulin induced gene 1 [Source:HGNC Symbol;Acc:6083]                                       |  |
| <b>INSR</b>   | Insulin receptor [Source:HGNC Symbol;Acc:6091]                                             |  |
| <b>INSRR</b>  | Insulin receptor-related receptor [Source:HGNC Symbol;Acc:6093]                            |  |
| <b>INTS1</b>  | Integrator complex subunit 1 [Source:HGNC Symbol;Acc:24555]                                |  |
| <b>INTS10</b> | Integrator complex subunit 10 [Source:HGNC Symbol;Acc:25548]                               |  |
| <b>INTS2</b>  | Integrator complex subunit 2 [Source:HGNC Symbol;Acc:29241]                                |  |
| <b>INTS5</b>  | Integrator complex subunit 5 [Source:HGNC Symbol;Acc:29352]                                |  |
| <b>INTS8</b>  | Integrator complex subunit 8 [Source:HGNC Symbol;Acc:26048]                                |  |
| <b>INTU</b>   | Inturned planar cell polarity effector homolog (Drosophila) [Source:HGNC Symbol;Acc:29239] |  |
| <b>IPCEF1</b> | Interaction protein for cytohesin exchange factors 1 [Source:HGNC Symbol;Acc:21204]        |  |
| <b>IPO13</b>  | Importin 13 [Source:HGNC Symbol;Acc:16853]                                                 |  |
| <b>IPO5</b>   | Importin 5 [Source:HGNC Symbol;Acc:6402]                                                   |  |
| <b>IPO9</b>   | Importin 9 [Source:HGNC Symbol;Acc:19425]                                                  |  |
| <b>IQCA1</b>  | IQ motif containing with AAA domain 1 [Source:HGNC Symbol;Acc:26195]                       |  |
| <b>IQCG</b>   | IQ motif containing G [Source:HGNC Symbol;Acc:25251]                                       |  |
| <b>IQCH</b>   | IQ motif containing H [Source:HGNC Symbol;Acc:25721]                                       |  |

|                |                                                                                            |  |
|----------------|--------------------------------------------------------------------------------------------|--|
| <b>IQGAP1</b>  | IQ motif containing gtpase activating protein 1 [Source:HGNC Symbol;Acc:6110]              |  |
| <b>IQGAP2</b>  | IQ motif containing gtpase activating protein 2 [Source:HGNC Symbol;Acc:6111]              |  |
| <b>IQGAP3</b>  | IQ motif containing gtpase activating protein 3 [Source:HGNC Symbol;Acc:20669]             |  |
| <b>IQSEC1</b>  | IQ motif and Sec7 domain 1 [Source:HGNC Symbol;Acc:29112]                                  |  |
| <b>IRAK3</b>   | Interleukin-1 receptor-associated kinase 3 [Source:HGNC Symbol;Acc:17020]                  |  |
| <b>IREB2</b>   | Iron-responsive element binding protein 2 [Source:HGNC Symbol;Acc:6115]                    |  |
| <b>IRF1</b>    | Interferon regulatory factor 1 [Source:HGNC Symbol;Acc:6116]                               |  |
| <b>IRF2BPL</b> | Interferon regulatory factor 2 binding protein-like [Source:HGNC Symbol;Acc:14282]         |  |
| <b>IRF5</b>    | Interferon regulatory factor 5 [Source:HGNC Symbol;Acc:6120]                               |  |
| <b>IRGQ</b>    | Immunity-related gtpase family, Q [Source:HGNC Symbol;Acc:24868]                           |  |
| <b>IRS1</b>    | Insulin receptor substrate 1 [Source:HGNC Symbol;Acc:6125]                                 |  |
| <b>IRS2</b>    | Insulin receptor substrate 2 [Source:HGNC Symbol;Acc:6126]                                 |  |
| <b>IRX6</b>    | Iroquois homeobox 6 [Source:HGNC Symbol;Acc:14675]                                         |  |
| <b>ISCU</b>    | Iron-sulfur cluster scaffold homolog (E. Coli) [Source:HGNC Symbol;Acc:29882]              |  |
| <b>ISG20</b>   | Interferon stimulated exonuclease gene 20kda [Source:HGNC Symbol;Acc:6130]                 |  |
| <b>ISLR2</b>   | Immunoglobulin superfamily containing leucine-rich repeat 2 [Source:HGNC Symbol;Acc:29286] |  |
| <b>ISM2</b>    | Isthmin 2 homolog (zebrafish) [Source:HGNC Symbol;Acc:23176]                               |  |
| <b>ISOC1</b>   | Isochorismatase domain containing 1 [Source:HGNC Symbol;Acc:24254]                         |  |
| <b>ISPD</b>    | Isoprenoid synthase domain containing [Source:HGNC Symbol;Acc:37276]                       |  |
| <b>ISX</b>     | Intestine-specific homeobox [Source:HGNC Symbol;Acc:28084]                                 |  |
| <b>ISY1</b>    | ISY1 splicing factor homolog (S. Cerevisiae) [Source:HGNC Symbol;Acc:29201]                |  |
| <b>ISYNA1</b>  | Inositol-3-phosphate synthase 1 [Source:HGNC Symbol;Acc:29821]                             |  |



|                 |                                                                                                                        |   |
|-----------------|------------------------------------------------------------------------------------------------------------------------|---|
| <b>ITCH</b>     | Itchy E3 ubiquitin protein ligase homolog (mouse) [Source:HGNC Symbol;Acc:13890]                                       |   |
| <b>ITFG3</b>    | Integrin alpha FG-GAP repeat containing 3 [Source:HGNC Symbol;Acc:14163]                                               |   |
| <b>ITGA10</b>   | Integrin, alpha 10 [Source:HGNC Symbol;Acc:6135]                                                                       |   |
| <b>ITGA11</b>   | Integrin, alpha 11 [Source:HGNC Symbol;Acc:6136]                                                                       |   |
| <b>ITGA2</b>    | Integrin, alpha 2 (CD49B, alpha 2 subunit of VLA-2 receptor) [Source:HGNC Symbol;Acc:6137]                             |   |
| <b>ITGA4</b>    | Integrin, alpha 4 (antigen CD49D, alpha 4 subunit of VLA-4 receptor) [Source:HGNC Symbol;Acc:6140]                     |   |
| <b>ITGA5</b>    | Integrin, alpha 5 (fibronectin receptor, alpha polypeptide) [Source:HGNC Symbol;Acc:6141]                              |   |
| <b>ITGAE</b>    | Integrin, alpha E (antigen CD103, human mucosal lymphocyte antigen 1; alpha polypeptide) [Source:HGNC Symbol;Acc:6147] |   |
| <b>ITGB1BP1</b> | Integrin beta 1 binding protein 1 [Source:HGNC Symbol;Acc:23927]                                                       |   |
| <b>ITGB1BP2</b> | Integrin beta 1 binding protein (melusin) 2 [Source:HGNC Symbol;Acc:6154]                                              |   |
| <b>ITGB2</b>    | Integrin, beta 2 (complement component 3 receptor 3 and 4 subunit) [Source:HGNC Symbol;Acc:6155]                       |   |
| <b>ITGB4</b>    | Integrin, beta 4 [Source:HGNC Symbol;Acc:6158]                                                                         |   |
| <b>ITGB5</b>    | Integrin, beta 5 [Source:HGNC Symbol;Acc:6160]                                                                         |   |
| <b>ITGB7</b>    | Integrin, beta 7 [Source:HGNC Symbol;Acc:6162]                                                                         |   |
| <b>ITIH2</b>    | Inter-alpha (globulin) inhibitor H2 [Source:HGNC Symbol;Acc:6167]                                                      |   |
| <b>ITIH3</b>    | Inter-alpha (globulin) inhibitor H3 [Source:HGNC Symbol;Acc:6168]                                                      |   |
| <b>ITIH5L</b>   | Inter-alpha (globulin) inhibitor H5-like [Source:HGNC Symbol;Acc:28907]                                                |   |
| <b>ITK</b>      | IL2-inducible T-cell kinase                                                                                            | √ |
| <b>ITLN1</b>    | Intelectin 1 (galactofuranose binding) [Source:HGNC Symbol;Acc:18259]                                                  |   |
| <b>ITM2A</b>    | Integral membrane protein 2A [Source:HGNC Symbol;Acc:6173]                                                             |   |
| <b>ITPKB</b>    | Inositol 1,4,5-trisphosphate 3-kinase B [Source:HGNC Symbol;Acc:6179]                                                  |   |
| <b>ITPR1</b>    | Inositol 1,4,5-triphosphate receptor, type 1 [Source:HGNC Symbol;Acc:6180]                                             |   |
| <b>ITPR2</b>    | Inositol 1,4,5-triphosphate receptor, type 2 [Source:HGNC Symbol;Acc:6181]                                             |   |

|                      |                                                                                                |   |
|----------------------|------------------------------------------------------------------------------------------------|---|
| <b>ITPR3</b>         | Inositol 1,4,5-triphosphate receptor, type 3 [Source:HGNC Symbol;Acc:6182]                     |   |
| <b>ITPRIPL1</b>      | Inositol 1,4,5-triphosphate receptor interacting protein-like 1 [Source:HGNC Symbol;Acc:29371] |   |
| <b>ITPRIPL2</b>      | Inositol 1,4,5-triphosphate receptor interacting protein-like 2 [Source:HGNC Symbol;Acc:27257] |   |
| <b>ITSN1</b>         | Intersectin 1 (SH3 domain protein) [Source:HGNC Symbol;Acc:6183]                               |   |
| <b>ITSN2</b>         | Intersectin 2 [Source:HGNC Symbol;Acc:6184]                                                    |   |
| <b>IVNS1ABP</b>      | Influenza virus NS1A binding protein [Source:HGNC Symbol;Acc:16951]                            |   |
| <b>IYD</b>           | Iodotyrosine deiodinase [Source:HGNC Symbol;Acc:21071]                                         |   |
| <b>IZUMO1</b>        | Izumo sperm-egg fusion 1 [Source:HGNC Symbol;Acc:28539]                                        |   |
| <b>JAG1</b>          | Jagged 1 [Source:HGNC Symbol;Acc:6188]                                                         |   |
| <b>JAG2</b>          | Jagged 2 [Source:HGNC Symbol;Acc:6189]                                                         |   |
| <b>JAK3</b>          | Janus kinase 3                                                                                 | √ |
| <b>JAKMIP3</b>       | Janus kinase and microtubule interacting protein 3 [Source:HGNC Symbol;Acc:23523]              |   |
| <b>JAZF1</b>         | JAZF zinc finger 1                                                                             | √ |
| <b>JDP2</b>          | Jun dimerization protein 2 [Source:HGNC Symbol;Acc:17546]                                      |   |
| <b>JMJD4</b>         | Jumonji domain containing 4 [Source:HGNC Symbol;Acc:25724]                                     |   |
| <b>JMJD5</b>         | Jumonji domain containing 5 [Source:HGNC Symbol;Acc:25840]                                     |   |
| <b>JMJD6</b>         | Jumonji domain containing 6 [Source:HGNC Symbol;Acc:19355]                                     |   |
| <b>JMJD7</b>         | Jumonji domain containing 7 [Source:HGNC Symbol;Acc:34397]                                     |   |
| <b>JMJD7-PLA2G4B</b> | JMJD7-PLA2G4B readthrough [Source:HGNC Symbol;Acc:34449]                                       |   |
| <b>JOSD1</b>         | Josephin domain containing 1 [Source:HGNC Symbol;Acc:28953]                                    |   |
| <b>JTB</b>           | Jumping translocation breakpoint [Source:HGNC Symbol;Acc:6201]                                 |   |
| <b>JUN</b>           | Jun proto-oncogene                                                                             | √ |
| <b>JUND</b>          | Jun D proto-oncogene [Source:HGNC Symbol;Acc:6206]                                             |   |
| <b>KAAG1</b>         | Kidney associated antigen 1 [Source:HGNC Symbol;Acc:21031]                                     |   |
| <b>KALRN</b>         | Kalirin, rhogef kinase [Source:HGNC Symbol;Acc:4814]                                           |   |
| <b>KANK1</b>         | KN motif and ankyrin repeat domains 1 [Source:HGNC Symbol;Acc:19309]                           |   |
| <b>KAT2A</b>         | K(lysine) acetyltransferase 2A [Source:HGNC Symbol;Acc:4201]                                   |   |

|                |                                                                                                                                   |  |
|----------------|-----------------------------------------------------------------------------------------------------------------------------------|--|
| <b>KATNA1</b>  | Katanin p60 (atpase containing) subunit A 1 [Source:HGNC Symbol;Acc:6216]                                                         |  |
| <b>KATNAL2</b> | Katanin p60 subunit A-like 2 [Source:HGNC Symbol;Acc:25387]                                                                       |  |
| <b>KAZALD1</b> | Kazal-type serine peptidase inhibitor domain 1 [Source:HGNC Symbol;Acc:25460]                                                     |  |
| <b>KAZN</b>    | Kazrin, periplakin interacting protein [Source:HGNC Symbol;Acc:29173]                                                             |  |
| <b>KBTBD10</b> | Kelch repeat and BTB (POZ) domain containing 10 [Source:HGNC Symbol;Acc:16905]                                                    |  |
| <b>KBTBD11</b> | Kelch repeat and BTB (POZ) domain containing 11 [Source:HGNC Symbol;Acc:29104]                                                    |  |
| <b>KBTBD12</b> | Kelch repeat and BTB (POZ) domain containing 12 [Source:HGNC Symbol;Acc:25731]                                                    |  |
| <b>KBTBD8</b>  | Kelch repeat and BTB (POZ) domain containing 8 [Source:HGNC Symbol;Acc:30691]                                                     |  |
| <b>KCNA1</b>   | Potassium voltage-gated channel, shaker-related subfamily, member 1 (episodic ataxia with myokymia) [Source:HGNC Symbol;Acc:6218] |  |
| <b>KCNA4</b>   | Potassium voltage-gated channel, shaker-related subfamily, member 4 [Source:HGNC Symbol;Acc:6222]                                 |  |
| <b>KCNA7</b>   | Potassium voltage-gated channel, shaker-related subfamily, member 7 [Source:HGNC Symbol;Acc:6226]                                 |  |
| <b>KCNB1</b>   | Potassium voltage-gated channel, Shab-related subfamily, member 1 [Source:HGNC Symbol;Acc:6231]                                   |  |
| <b>KCNC4</b>   | Potassium voltage-gated channel, Shaw-related subfamily, member 4 [Source:HGNC Symbol;Acc:6236]                                   |  |
| <b>KCND1</b>   | Potassium voltage-gated channel, Shal-related subfamily, member 1 [Source:HGNC Symbol;Acc:6237]                                   |  |
| <b>KCND2</b>   | Potassium voltage-gated channel, Shal-related subfamily, member 2 [Source:HGNC Symbol;Acc:6238]                                   |  |
| <b>KCND3</b>   | Potassium voltage-gated channel, Shal-related subfamily, member 3 [Source:HGNC Symbol;Acc:6239]                                   |  |
| <b>KCNE2</b>   | Potassium voltage-gated channel, Isk-related family, member 2 [Source:HGNC Symbol;Acc:6242]                                       |  |

|               |                                                                                                     |   |
|---------------|-----------------------------------------------------------------------------------------------------|---|
| <b>KCNG1</b>  | Potassium voltage-gated channel, subfamily G, member 1 [Source:HGNC Symbol;Acc:6248]                |   |
| <b>KCNG3</b>  | Potassium voltage-gated channel, subfamily G, member 3 [Source:HGNC Symbol;Acc:18306]               |   |
| <b>KCNG4</b>  | Potassium voltage-gated channel, subfamily G, member 4 [Source:HGNC Symbol;Acc:19697]               |   |
| <b>KCNH1</b>  | Potassium voltage-gated channel, subfamily H (eag-related), member 1 [Source:HGNC Symbol;Acc:6250]  |   |
| <b>KCNH3</b>  | Potassium voltage-gated channel, subfamily H (eag-related), member 3 [Source:HGNC Symbol;Acc:6252]  |   |
| <b>KCNH6</b>  | Potassium voltage-gated channel, subfamily H (eag-related), member 6 [Source:HGNC Symbol;Acc:18862] |   |
| <b>KCNIP3</b> | Kv channel interacting protein 3, calsenilin [Source:HGNC Symbol;Acc:15523]                         |   |
| <b>KCNJ1</b>  | Potassium inwardly-rectifying channel, subfamily J, member 1 [Source:HGNC Symbol;Acc:6255]          |   |
| <b>KCNJ12</b> | Potassium inwardly-rectifying channel, subfamily J, member 12 [Source:HGNC Symbol;Acc:6258]         |   |
| <b>KCNJ15</b> | Potassium inwardly-rectifying channel, subfamily J, member 15 [Source:HGNC Symbol;Acc:6261]         |   |
| <b>KCNJ16</b> | Potassium inwardly-rectifying channel, subfamily J, member 16 [Source:HGNC Symbol;Acc:6262]         |   |
| <b>KCNJ2</b>  | Potassium inwardly-rectifying channel, subfamily J, member 2 [Source:HGNC Symbol;Acc:6263]          |   |
| <b>KCNJ5</b>  | Potassium inwardly-rectifying channel, subfamily J, member 5                                        | √ |
| <b>KCNJ9</b>  | Potassium inwardly-rectifying channel, subfamily J, member 9 [Source:HGNC Symbol;Acc:6270]          |   |
| <b>KCNK10</b> | Potassium channel, subfamily K, member 10 [Source:HGNC Symbol;Acc:6273]                             |   |
| <b>KCNK17</b> | Potassium channel, subfamily K, member 17 [Source:HGNC Symbol;Acc:14465]                            |   |
| <b>KCNK2</b>  | Potassium channel, subfamily K, member 2 [Source:HGNC Symbol;Acc:6277]                              |   |

|               |                                                                                                                         |  |
|---------------|-------------------------------------------------------------------------------------------------------------------------|--|
| <b>KCNK3</b>  | Potassium channel, subfamily K, member 3 [Source:HGNC Symbol;Acc:6278]                                                  |  |
| <b>KCNK4</b>  | Potassium channel, subfamily K, member 4 [Source:HGNC Symbol;Acc:6279]                                                  |  |
| <b>KCNK5</b>  | Potassium channel, subfamily K, member 5 [Source:HGNC Symbol;Acc:6280]                                                  |  |
| <b>KCNK6</b>  | Potassium channel, subfamily K, member 6 [Source:HGNC Symbol;Acc:6281]                                                  |  |
| <b>KCNMA1</b> | Potassium large conductance calcium-activated channel, subfamily M, alpha member 1 [Source:HGNC Symbol;Acc:6284]        |  |
| <b>KCNMB4</b> | Potassium large conductance calcium-activated channel, subfamily M, beta member 4 [Source:HGNC Symbol;Acc:6289]         |  |
| <b>KCNN1</b>  | Potassium intermediate/small conductance calcium-activated channel, subfamily N, member 1 [Source:HGNC Symbol;Acc:6290] |  |
| <b>KCNQ1</b>  | Potassium voltage-gated channel, KQT-like subfamily, member 1 [Source:HGNC Symbol;Acc:6294]                             |  |
| <b>KCNQ3</b>  | Potassium voltage-gated channel, KQT-like subfamily, member 3 [Source:HGNC Symbol;Acc:6297]                             |  |
| <b>KCNQ4</b>  | Potassium voltage-gated channel, KQT-like subfamily, member 4 [Source:HGNC Symbol;Acc:6298]                             |  |
| <b>KCNS1</b>  | Potassium voltage-gated channel, delayed-rectifier, subfamily S, member 1 [Source:HGNC Symbol;Acc:6300]                 |  |
| <b>KCTD10</b> | Potassium channel tetramerisation domain containing 10 [Source:HGNC Symbol;Acc:23236]                                   |  |
| <b>KCTD12</b> | Potassium channel tetramerisation domain containing 12 [Source:HGNC Symbol;Acc:14678]                                   |  |
| <b>KCTD14</b> | Potassium channel tetramerisation domain containing 14 [Source:HGNC Symbol;Acc:23295]                                   |  |
| <b>KCTD15</b> | Potassium channel tetramerisation domain containing 15 [Source:HGNC Symbol;Acc:23297]                                   |  |
| <b>KCTD16</b> | Potassium channel tetramerisation domain containing 16 [Source:HGNC Symbol;Acc:29244]                                   |  |

|                 |                                                                                                    |   |
|-----------------|----------------------------------------------------------------------------------------------------|---|
| <b>KCTD18</b>   | Potassium channel tetramerisation domain containing 18 [Source:HGNC Symbol;Acc:26446]              |   |
| <b>KCTD2</b>    | Potassium channel tetramerisation domain containing 2 [Source:HGNC Symbol;Acc:21294]               |   |
| <b>KCTD3</b>    | Potassium channel tetramerisation domain containing 3 [Source:HGNC Symbol;Acc:21305]               |   |
| <b>KCTD6</b>    | Potassium channel tetramerisation domain containing 6 [Source:HGNC Symbol;Acc:22235]               |   |
| <b>KCTD7</b>    | Potassium channel tetramerisation domain containing 7 [Source:HGNC Symbol;Acc:21957]               |   |
| <b>KDM1A</b>    | Lysine (K)-specific demethylase 1A [Source:HGNC Symbol;Acc:29079]                                  |   |
| <b>KDM2B</b>    | Lysine (K)-specific demethylase 2B [Source:HGNC Symbol;Acc:13610]                                  |   |
| <b>KDM3A</b>    | Lysine (K)-specific demethylase 3A [Source:HGNC Symbol;Acc:20815]                                  |   |
| <b>KDM4A</b>    | Lysine (K)-specific demethylase 4A [Source:HGNC Symbol;Acc:22978]                                  |   |
| <b>KDM4C</b>    | Lysine (K)-specific demethylase 4C [Source:HGNC Symbol;Acc:17071]                                  |   |
| <b>KDM5A</b>    | Lysine (K)-specific demethylase 5A                                                                 | √ |
| <b>KDM5B</b>    | Lysine (K)-specific demethylase 5B [Source:HGNC Symbol;Acc:18039]                                  |   |
| <b>KDSR</b>     | 3-ketodihydrosphingosine reductase [Source:HGNC Symbol;Acc:4021]                                   |   |
| <b>KEAP1</b>    | Kelch-like ECH-associated protein 1 [Source:HGNC Symbol;Acc:23177]                                 |   |
| <b>KEL</b>      | Kell blood group, metallo-endopeptidase [Source:HGNC Symbol;Acc:6308]                              |   |
| <b>KHDC1</b>    | KH homology domain containing 1 [Source:HGNC Symbol;Acc:21366]                                     |   |
| <b>KHDRBS1</b>  | KH domain containing, RNA binding, signal transduction associated 1 [Source:HGNC Symbol;Acc:18116] |   |
| <b>KHNYN</b>    | KH and NYN domain containing [Source:HGNC Symbol;Acc:20166]                                        |   |
| <b>KIAA0087</b> | KIAA0087 [Source:HGNC Symbol;Acc:22191]                                                            |   |
| <b>KIAA0090</b> | KIAA0090 [Source:HGNC Symbol;Acc:28957]                                                            |   |
| <b>KIAA0141</b> | KIAA0141 [Source:HGNC Symbol;Acc:28969]                                                            |   |
| <b>KIAA0182</b> | KIAA0182 [Source:HGNC Symbol;Acc:28979]                                                            |   |
| <b>KIAA0195</b> | KIAA0195 [Source:HGNC Symbol;Acc:28983]                                                            |   |
| <b>KIAA0196</b> | KIAA0196 [Source:HGNC Symbol;Acc:28984]                                                            |   |
| <b>KIAA0226</b> | KIAA0226 [Source:HGNC Symbol;Acc:28991]                                                            |   |
| <b>KIAA0232</b> | KIAA0232 [Source:HGNC Symbol;Acc:28992]                                                            |   |

|                  |                                              |  |
|------------------|----------------------------------------------|--|
| <b>KIAA0240</b>  | KIAA0240 [Source:HGNC Symbol;Acc:21111]      |  |
| <b>KIAA0284</b>  | KIAA0284 [Source:HGNC Symbol;Acc:20362]      |  |
| <b>KIAA0319L</b> | KIAA0319-like [Source:HGNC Symbol;Acc:30071] |  |
| <b>KIAA0355</b>  | KIAA0355 [Source:HGNC Symbol;Acc:29016]      |  |
| <b>KIAA0391</b>  | KIAA0391 [Source:HGNC Symbol;Acc:19958]      |  |
| <b>KIAA0430</b>  | KIAA0430 [Source:HGNC Symbol;Acc:29562]      |  |
| <b>KIAA0467</b>  | KIAA0467 [Source:HGNC Symbol;Acc:29040]      |  |
| <b>KIAA0564</b>  | KIAA0564 [Source:HGNC Symbol;Acc:29071]      |  |
| <b>KIAA0586</b>  | KIAA0586 [Source:HGNC Symbol;Acc:19960]      |  |
| <b>KIAA0649</b>  | KIAA0649 [Source:HGNC Symbol;Acc:29089]      |  |
| <b>KIAA0664</b>  | KIAA0664 [Source:HGNC Symbol;Acc:29094]      |  |
| <b>KIAA0753</b>  | KIAA0753 [Source:HGNC Symbol;Acc:29110]      |  |
| <b>KIAA0889</b>  | KIAA0889 [Source:HGNC Symbol;Acc:16111]      |  |
| <b>KIAA0895</b>  | KIAA0895 [Source:HGNC Symbol;Acc:22206]      |  |
| <b>KIAA0930</b>  | KIAA0930 [Source:HGNC Symbol;Acc:1314]       |  |
| <b>KIAA0947</b>  | KIAA0947 [Source:HGNC Symbol;Acc:29154]      |  |
| <b>KIAA1009</b>  | KIAA1009 [Source:HGNC Symbol;Acc:21107]      |  |
| <b>KIAA1024</b>  | KIAA1024 [Source:HGNC Symbol;Acc:29172]      |  |
| <b>KIAA1033</b>  | KIAA1033 [Source:HGNC Symbol;Acc:29174]      |  |
| <b>KIAA1045</b>  | KIAA1045 [Source:HGNC Symbol;Acc:29180]      |  |
| <b>KIAA1109</b>  | KIAA1109 [Source:HGNC Symbol;Acc:26953]      |  |
| <b>KIAA1199</b>  | KIAA1199 [Source:HGNC Symbol;Acc:29213]      |  |
| <b>KIAA1217</b>  | KIAA1217 [Source:HGNC Symbol;Acc:25428]      |  |
| <b>KIAA1244</b>  | KIAA1244 [Source:HGNC Symbol;Acc:21213]      |  |
| <b>KIAA1257</b>  | KIAA1257 [Source:HGNC Symbol;Acc:29231]      |  |
| <b>KIAA1267</b>  | KIAA1267 [Source:HGNC Symbol;Acc:24565]      |  |
| <b>KIAA1274</b>  | KIAA1274 [Source:HGNC Symbol;Acc:23530]      |  |
| <b>KIAA1310</b>  | KIAA1310 [Source:HGNC Symbol;Acc:25473]      |  |
| <b>KIAA1324</b>  | KIAA1324 [Source:HGNC Symbol;Acc:29618]      |  |
| <b>KIAA1328</b>  | KIAA1328 [Source:HGNC Symbol;Acc:29248]      |  |
| <b>KIAA1409</b>  | KIAA1409 [Source:HGNC Symbol;Acc:19966]      |  |
| <b>KIAA1430</b>  | KIAA1430 [Source:HGNC Symbol;Acc:29276]      |  |
| <b>KIAA1462</b>  | KIAA1462 [Source:HGNC Symbol;Acc:29283]      |  |

|                  |                                                                       |   |
|------------------|-----------------------------------------------------------------------|---|
| <b>KIAA1522</b>  | KIAA1522 [Source:HGNC Symbol;Acc:29301]                               |   |
| <b>KIAA1524</b>  | KIAA1524 [Source:HGNC Symbol;Acc:29302]                               |   |
| <b>KIAA1539</b>  | KIAA1539 [Source:HGNC Symbol;Acc:25666]                               |   |
| <b>KIAA1549</b>  | KIAA1549                                                              | √ |
| <b>KIAA1598</b>  | KIAA1598 [Source:HGNC Symbol;Acc:29319]                               |   |
| <b>KIAA1614</b>  | KIAA1614 [Source:HGNC Symbol;Acc:29327]                               |   |
| <b>KIAA1632</b>  | KIAA1632 [Source:HGNC Symbol;Acc:29331]                               |   |
| <b>KIAA1671</b>  | KIAA1671 [Source:HGNC Symbol;Acc:29345]                               |   |
| <b>KIAA1683</b>  | KIAA1683 [Source:HGNC Symbol;Acc:29350]                               |   |
| <b>KIAA1712</b>  | KIAA1712 [Source:HGNC Symbol;Acc:29356]                               |   |
| <b>KIAA1715</b>  | KIAA1715 [Source:HGNC Symbol;Acc:21610]                               |   |
| <b>KIAA1755</b>  | KIAA1755 [Source:HGNC Symbol;Acc:29372]                               |   |
| <b>KIAA1797</b>  | KIAA1797 [Source:HGNC Symbol;Acc:23377]                               |   |
| <b>KIAA1841</b>  | KIAA1841 [Source:HGNC Symbol;Acc:29387]                               |   |
| <b>KIAA1967</b>  | KIAA1967 [Source:HGNC Symbol;Acc:23360]                               |   |
| <b>KIAA2013</b>  | KIAA2013 [Source:HGNC Symbol;Acc:28513]                               |   |
| <b>KIAA2018</b>  | KIAA2018 [Source:HGNC Symbol;Acc:30494]                               |   |
| <b>KIAA2022</b>  | KIAA2022 [Source:HGNC Symbol;Acc:29433]                               |   |
| <b>KIDINS220</b> | Kinase D-interacting substrate, 220kda [Source:HGNC Symbol;Acc:29508] |   |
| <b>KIF12</b>     | Kinesin family member 12 [Source:HGNC Symbol;Acc:21495]               |   |
| <b>KIF14</b>     | Kinesin family member 14 [Source:HGNC Symbol;Acc:19181]               |   |
| <b>KIF1A</b>     | Kinesin family member 1A [Source:HGNC Symbol;Acc:888]                 |   |
| <b>KIF1B</b>     | Kinesin family member 1B [Source:HGNC Symbol;Acc:16636]               |   |
| <b>KIF1C</b>     | Kinesin family member 1C [Source:HGNC Symbol;Acc:6317]                |   |
| <b>KIF21A</b>    | Kinesin family member 21A [Source:HGNC Symbol;Acc:19349]              |   |
| <b>KIF26A</b>    | Kinesin family member 26A [Source:HGNC Symbol;Acc:20226]              |   |
| <b>KIF26B</b>    | Kinesin family member 26B [Source:HGNC Symbol;Acc:25484]              |   |
| <b>KIF2B</b>     | Kinesin family member 2B [Source:HGNC Symbol;Acc:29443]               |   |
| <b>KIF3A</b>     | Kinesin family member 3A [Source:HGNC Symbol;Acc:6319]                |   |
| <b>KIF3B</b>     | Kinesin family member 3B [Source:HGNC Symbol;Acc:6320]                |   |
| <b>KIF3C</b>     | Kinesin family member 3C [Source:HGNC Symbol;Acc:6321]                |   |
| <b>KIF4A</b>     | Kinesin family member 4A [Source:HGNC Symbol;Acc:13339]               |   |
| <b>KIF4B</b>     | Kinesin family member 4B [Source:HGNC Symbol;Acc:6322]                |   |



|                |                                                                                                               |   |
|----------------|---------------------------------------------------------------------------------------------------------------|---|
| <b>KIF5C</b>   | Kinesin family member 5C [Source:HGNC Symbol;Acc:6325]                                                        |   |
| <b>KIF6</b>    | Kinesin family member 6 [Source:HGNC Symbol;Acc:21202]                                                        |   |
| <b>KIF9</b>    | Kinesin family member 9 [Source:HGNC Symbol;Acc:16666]                                                        |   |
| <b>KIR2DL1</b> | Killer cell immunoglobulin-like receptor, two domains, long cytoplasmic tail, 1 [Source:HGNC Symbol;Acc:6329] |   |
| <b>KIRREL</b>  | Kin of IRRE like (Drosophila) [Source:HGNC Symbol;Acc:15734]                                                  |   |
| <b>KIRREL2</b> | Kin of IRRE like 2 (Drosophila) [Source:HGNC Symbol;Acc:18816]                                                |   |
| <b>KIRREL3</b> | Kin of IRRE like 3 (Drosophila) [Source:HGNC Symbol;Acc:23204]                                                |   |
| <b>KIT</b>     | V-kit Hardy-Zuckerman 4 feline sarcoma viral oncogene homolog                                                 | √ |
| <b>KITLG</b>   | KIT ligand [Source:HGNC Symbol;Acc:6343]                                                                      |   |
| <b>KL</b>      | Klotho [Source:HGNC Symbol;Acc:6344]                                                                          |   |
| <b>KLB</b>     | Klotho beta [Source:HGNC Symbol;Acc:15527]                                                                    |   |
| <b>KLF10</b>   | Kruppel-like factor 10 [Source:HGNC Symbol;Acc:11810]                                                         |   |
| <b>KLF11</b>   | Kruppel-like factor 11 [Source:HGNC Symbol;Acc:11811]                                                         |   |
| <b>KLF13</b>   | Kruppel-like factor 13 [Source:HGNC Symbol;Acc:13672]                                                         |   |
| <b>KLF3</b>    | Kruppel-like factor 3 (basic) [Source:HGNC Symbol;Acc:16516]                                                  |   |
| <b>KLF5</b>    | Kruppel-like factor 5 (intestinal) [Source:HGNC Symbol;Acc:6349]                                              |   |
| <b>KLF6</b>    | Kruppel-like factor 6 [Source:HGNC Symbol;Acc:2235]                                                           |   |
| <b>KLF7</b>    | Kruppel-like factor 7 (ubiquitous) [Source:HGNC Symbol;Acc:6350]                                              |   |
| <b>KLF8</b>    | Kruppel-like factor 8 [Source:HGNC Symbol;Acc:6351]                                                           |   |
| <b>KLHDC10</b> | Kelch domain containing 10 [Source:HGNC Symbol;Acc:22194]                                                     |   |
| <b>KLHDC4</b>  | Kelch domain containing 4 [Source:HGNC Symbol;Acc:25272]                                                      |   |
| <b>KLHDC5</b>  | Kelch domain containing 5 [Source:HGNC Symbol;Acc:29252]                                                      |   |
| <b>KLHDC7B</b> | Kelch domain containing 7B [Source:HGNC Symbol;Acc:25145]                                                     |   |
| <b>KLHL1</b>   | Kelch-like 1 (Drosophila) [Source:HGNC Symbol;Acc:6352]                                                       |   |
| <b>KLHL10</b>  | Kelch-like 10 (Drosophila) [Source:HGNC Symbol;Acc:18829]                                                     |   |
| <b>KLHL12</b>  | Kelch-like 12 (Drosophila) [Source:HGNC Symbol;Acc:19360]                                                     |   |
| <b>KLHL13</b>  | Kelch-like 13 (Drosophila) [Source:HGNC Symbol;Acc:22931]                                                     |   |
| <b>KLHL15</b>  | Kelch-like 15 (Drosophila) [Source:HGNC Symbol;Acc:29347]                                                     |   |
| <b>KLHL17</b>  | Kelch-like 17 (Drosophila) [Source:HGNC Symbol;Acc:24023]                                                     |   |
| <b>KLHL18</b>  | Kelch-like 18 (Drosophila) [Source:HGNC Symbol;Acc:29120]                                                     |   |
| <b>KLHL20</b>  | Kelch-like 20 (Drosophila) [Source:HGNC Symbol;Acc:25056]                                                     |   |
| <b>KLHL23</b>  | Kelch-like 23 (Drosophila) [Source:HGNC Symbol;Acc:27506]                                                     |   |

|               |                                                                                       |  |
|---------------|---------------------------------------------------------------------------------------|--|
| <b>KLHL24</b> | Kelch-like 24 (Drosophila) [Source:HGNC Symbol;Acc:25947]                             |  |
| <b>KLHL25</b> | Kelch-like 25 (Drosophila) [Source:HGNC Symbol;Acc:25732]                             |  |
| <b>KLHL26</b> | Kelch-like 26 (Drosophila) [Source:HGNC Symbol;Acc:25623]                             |  |
| <b>KLHL28</b> | Kelch-like 28 (Drosophila) [Source:HGNC Symbol;Acc:19741]                             |  |
| <b>KLHL3</b>  | Kelch-like 3 (Drosophila) [Source:HGNC Symbol;Acc:6354]                               |  |
| <b>KLHL30</b> | Kelch-like 30 (Drosophila) [Source:HGNC Symbol;Acc:24770]                             |  |
| <b>KLHL31</b> | Kelch-like 31 (Drosophila) [Source:HGNC Symbol;Acc:21353]                             |  |
| <b>KLHL33</b> | Kelch-like 33 (Drosophila) [Source:HGNC Symbol;Acc:31952]                             |  |
| <b>KLHL34</b> | Kelch-like 34 (Drosophila) [Source:HGNC Symbol;Acc:26634]                             |  |
| <b>KLHL35</b> | Kelch-like 35 (Drosophila) [Source:HGNC Symbol;Acc:26597]                             |  |
| <b>KLHL36</b> | Kelch-like 36 (Drosophila) [Source:HGNC Symbol;Acc:17844]                             |  |
| <b>KLHL4</b>  | Kelch-like 4 (Drosophila) [Source:HGNC Symbol;Acc:6355]                               |  |
| <b>KLHL5</b>  | Kelch-like 5 (Drosophila) [Source:HGNC Symbol;Acc:6356]                               |  |
| <b>KLHL6</b>  | Kelch-like 6 (Drosophila) [Source:HGNC Symbol;Acc:18653]                              |  |
| <b>KLHL8</b>  | Kelch-like 8 (Drosophila) [Source:HGNC Symbol;Acc:18644]                              |  |
| <b>KLHL9</b>  | Kelch-like 9 (Drosophila) [Source:HGNC Symbol;Acc:18732]                              |  |
| <b>KLK5</b>   | Kallikrein-related peptidase 5 [Source:HGNC Symbol;Acc:6366]                          |  |
| <b>KLK6</b>   | Kallikrein-related peptidase 6 [Source:HGNC Symbol;Acc:6367]                          |  |
| <b>KLK8</b>   | Kallikrein-related peptidase 8 [Source:HGNC Symbol;Acc:6369]                          |  |
| <b>KLK9</b>   | Kallikrein-related peptidase 9 [Source:HGNC Symbol;Acc:6370]                          |  |
| <b>KLRB1</b>  | Killer cell lectin-like receptor subfamily B, member 1 [Source:HGNC Symbol;Acc:6373]  |  |
| <b>KLRF1</b>  | Killer cell lectin-like receptor subfamily F, member 1 [Source:HGNC Symbol;Acc:13342] |  |
| <b>KLRG2</b>  | Killer cell lectin-like receptor subfamily G, member 2 [Source:HGNC Symbol;Acc:24778] |  |
| <b>KNDC1</b>  | Kinase non-catalytic C-lobe domain (KIND) containing 1 [Source:HGNC Symbol;Acc:29374] |  |
| <b>KNTC1</b>  | Kinetochore associated 1 [Source:HGNC Symbol;Acc:17255]                               |  |
| <b>KPNA1</b>  | Karyopherin alpha 1 (importin alpha 5) [Source:HGNC Symbol;Acc:6394]                  |  |
| <b>KPNA3</b>  | Karyopherin alpha 3 (importin alpha 4) [Source:HGNC Symbol;Acc:6396]                  |  |
| <b>KPNA4</b>  | Karyopherin alpha 4 (importin alpha 3) [Source:HGNC Symbol;Acc:6397]                  |  |
| <b>KPNA6</b>  | Karyopherin alpha 6 (importin alpha 7) [Source:HGNC Symbol;Acc:6399]                  |  |

|                |                                                                                               |   |
|----------------|-----------------------------------------------------------------------------------------------|---|
| <b>KPNB1</b>   | Karyopherin (importin) beta 1 [Source:HGNC Symbol;Acc:6400]                                   |   |
| <b>KPRP</b>    | Keratinocyte proline-rich protein [Source:HGNC Symbol;Acc:31823]                              |   |
| <b>KRAS</b>    | V-Ki-ras2 Kirsten rat sarcoma viral oncogene homolog                                          | √ |
| <b>KRBA1</b>   | KRAB-A domain containing 1 [Source:HGNC Symbol;Acc:22228]                                     |   |
| <b>KRBA2</b>   | KRAB-A domain containing 2 [Source:HGNC Symbol;Acc:26989]                                     |   |
| <b>KRBOX1</b>  | KRAB box domain containing 1 [Source:HGNC Symbol;Acc:38708]                                   |   |
| <b>KREMEN1</b> | Kringle containing transmembrane protein 1 [Source:HGNC Symbol;Acc:17550]                     |   |
| <b>KRIT1</b>   | KRIT1, ankyrin repeat containing [Source:HGNC Symbol;Acc:1573]                                |   |
| <b>KRR1</b>    | KRR1, small subunit (SSU) processome component, homolog (yeast) [Source:HGNC Symbol;Acc:5176] |   |
| <b>KRT12</b>   | Keratin 12 [Source:HGNC Symbol;Acc:6414]                                                      |   |
| <b>KRT13</b>   | Keratin 13 [Source:HGNC Symbol;Acc:6415]                                                      |   |
| <b>KRT15</b>   | Keratin 15 [Source:HGNC Symbol;Acc:6421]                                                      |   |
| <b>KRT16</b>   | Keratin 16 [Source:HGNC Symbol;Acc:6423]                                                      |   |
| <b>KRT17</b>   | Keratin 17 [Source:HGNC Symbol;Acc:6427]                                                      |   |
| <b>KRT20</b>   | Keratin 20 [Source:HGNC Symbol;Acc:20412]                                                     |   |
| <b>KRT222</b>  | Keratin 222 [Source:HGNC Symbol;Acc:28695]                                                    |   |
| <b>KRT24</b>   | Keratin 24 [Source:HGNC Symbol;Acc:18527]                                                     |   |
| <b>KRT26</b>   | Keratin 26 [Source:HGNC Symbol;Acc:30840]                                                     |   |
| <b>KRT33A</b>  | Keratin 33A [Source:HGNC Symbol;Acc:6450]                                                     |   |
| <b>KRT33B</b>  | Keratin 33B [Source:HGNC Symbol;Acc:6451]                                                     |   |
| <b>KRT35</b>   | Keratin 35 [Source:HGNC Symbol;Acc:6453]                                                      |   |
| <b>KRT37</b>   | Keratin 37 [Source:HGNC Symbol;Acc:6455]                                                      |   |
| <b>KRT40</b>   | Keratin 40 [Source:HGNC Symbol;Acc:26707]                                                     |   |
| <b>KRT6B</b>   | Keratin 6B [Source:HGNC Symbol;Acc:6444]                                                      |   |
| <b>KRT72</b>   | Keratin 72 [Source:HGNC Symbol;Acc:28932]                                                     |   |
| <b>KRT74</b>   | Keratin 74 [Source:HGNC Symbol;Acc:28929]                                                     |   |
| <b>KRT80</b>   | Keratin 80 [Source:HGNC Symbol;Acc:27056]                                                     |   |
| <b>KRT83</b>   | Keratin 83 [Source:HGNC Symbol;Acc:6460]                                                      |   |
| <b>KRT84</b>   | Keratin 84 [Source:HGNC Symbol;Acc:6461]                                                      |   |
| <b>KRT85</b>   | Keratin 85 [Source:HGNC Symbol;Acc:6462]                                                      |   |
| <b>KRT8P11</b> | Keratin 8 pseudogene 11 [Source:HGNC Symbol;Acc:31058]                                        |   |

|                   |                                                                                            |  |
|-------------------|--------------------------------------------------------------------------------------------|--|
| <b>KRT9</b>       | Keratin 9 [Source:HGNC Symbol;Acc:6447]                                                    |  |
| <b>KRTAP10-10</b> | Keratin associated protein 10-10 [Source:HGNC Symbol;Acc:22972]                            |  |
| <b>KRTAP10-6</b>  | Keratin associated protein 10-6 [Source:HGNC Symbol;Acc:20523]                             |  |
| <b>KRTAP26-1</b>  | Keratin associated protein 26-1 [Source:HGNC Symbol;Acc:33760]                             |  |
| <b>KRTAP3-1</b>   | Keratin associated protein 3-1 [Source:HGNC Symbol;Acc:16778]                              |  |
| <b>KRTAP5-2</b>   | Keratin associated protein 5-2 [Source:HGNC Symbol;Acc:23597]                              |  |
| <b>KRTCAP2</b>    | Keratinocyte associated protein 2 [Source:HGNC Symbol;Acc:28942]                           |  |
| <b>KSR1</b>       | Kinase suppressor of ras 1 [Source:HGNC Symbol;Acc:6465]                                   |  |
| <b>KSR2</b>       | Kinase suppressor of ras 2 [Source:HGNC Symbol;Acc:18610]                                  |  |
| <b>L2HGDH</b>     | L-2-hydroxyglutarate dehydrogenase [Source:HGNC Symbol;Acc:20499]                          |  |
| <b>L3MBTL1</b>    | L(3)mbt-like 1 (Drosophila) [Source:HGNC Symbol;Acc:15905]                                 |  |
| <b>LACE1</b>      | Lactation elevated 1 [Source:HGNC Symbol;Acc:16411]                                        |  |
| <b>LACTB</b>      | Lactamase, beta [Source:HGNC Symbol;Acc:16468]                                             |  |
| <b>LAMA1</b>      | Laminin, alpha 1 [Source:HGNC Symbol;Acc:6481]                                             |  |
| <b>LAMA2</b>      | Laminin, alpha 2 [Source:HGNC Symbol;Acc:6482]                                             |  |
| <b>LAMA3</b>      | Laminin, alpha 3 [Source:HGNC Symbol;Acc:6483]                                             |  |
| <b>LAMA4</b>      | Laminin, alpha 4 [Source:HGNC Symbol;Acc:6484]                                             |  |
| <b>LAMA5</b>      | Laminin, alpha 5 [Source:HGNC Symbol;Acc:6485]                                             |  |
| <b>LAMB2</b>      | Laminin, beta 2 (laminin S) [Source:HGNC Symbol;Acc:6487]                                  |  |
| <b>LAMB3</b>      | Laminin, beta 3 [Source:HGNC Symbol;Acc:6490]                                              |  |
| <b>LAMC1</b>      | Laminin, gamma 1 (formerly LAMB2) [Source:HGNC Symbol;Acc:6492]                            |  |
| <b>LAMC2</b>      | Laminin, gamma 2 [Source:HGNC Symbol;Acc:6493]                                             |  |
| <b>LAMP2</b>      | Lysosomal-associated membrane protein 2 [Source:HGNC Symbol;Acc:6501]                      |  |
| <b>LAMTOR3</b>    | Late endosomal/lysosomal adaptor, MAPK and MTOR activator 3 [Source:HGNC Symbol;Acc:15606] |  |
| <b>LANCL1</b>     | Lanc lantibiotic synthetase component C-like 1 (bacterial) [Source:HGNC Symbol;Acc:6508]   |  |
| <b>LAP3</b>       | Leucine aminopeptidase 3 [Source:HGNC Symbol;Acc:18449]                                    |  |
| <b>LARGE</b>      | Like-glycosyltransferase [Source:HGNC Symbol;Acc:6511]                                     |  |
| <b>LARP6</b>      | La ribonucleoprotein domain family, member 6 [Source:HGNC Symbol;Acc:24012]                |  |
| <b>LARS2</b>      | Leucyl-trna synthetase 2, mitochondrial [Source:HGNC Symbol;Acc:17095]                     |  |

|                |                                                                                             |   |
|----------------|---------------------------------------------------------------------------------------------|---|
| <b>LAS1L</b>   | LAS1-like ( <i>S. Cerevisiae</i> ) [Source:HGNC Symbol;Acc:25726]                           |   |
| <b>LASP1</b>   | LIM and SH3 protein 1                                                                       | √ |
| <b>LASS1</b>   | LAG1 homolog, ceramide synthase 1 [Source:HGNC Symbol;Acc:14253]                            |   |
| <b>LASS3</b>   | LAG1 homolog, ceramide synthase 3 [Source:HGNC Symbol;Acc:23752]                            |   |
| <b>LAT2</b>    | Linker for activation of T cells family, member 2 [Source:HGNC Symbol;Acc:12749]            |   |
| <b>LATS1</b>   | LATS, large tumor suppressor, homolog 1 ( <i>Drosophila</i> ) [Source:HGNC Symbol;Acc:6514] |   |
| <b>LATS2</b>   | LATS, large tumor suppressor, homolog 2 ( <i>Drosophila</i> ) [Source:HGNC Symbol;Acc:6515] |   |
| <b>LAX1</b>    | Lymphocyte transmembrane adaptor 1 [Source:HGNC Symbol;Acc:26005]                           |   |
| <b>LCE2A</b>   | Late cornified envelope 2A [Source:HGNC Symbol;Acc:29469]                                   |   |
| <b>LCE2B</b>   | Late cornified envelope 2B [Source:HGNC Symbol;Acc:16610]                                   |   |
| <b>LCN10</b>   | Lipocalin 10 [Source:HGNC Symbol;Acc:20892]                                                 |   |
| <b>LCN2</b>    | Lipocalin 2 [Source:HGNC Symbol;Acc:6526]                                                   |   |
| <b>LCOR</b>    | Ligand dependent nuclear receptor corepressor [Source:HGNC Symbol;Acc:29503]                |   |
| <b>LCORL</b>   | Ligand dependent nuclear receptor corepressor-like [Source:HGNC Symbol;Acc:30776]           |   |
| <b>LCPI</b>    | Lymphocyte cytosolic protein 1 (L-plastin)                                                  | √ |
| <b>LDHC</b>    | Lactate dehydrogenase C [Source:HGNC Symbol;Acc:6544]                                       |   |
| <b>LDLR</b>    | Low density lipoprotein receptor [Source:HGNC Symbol;Acc:6547]                              |   |
| <b>LDLRAD2</b> | Low density lipoprotein receptor class A domain containing 2 [Source:HGNC Symbol;Acc:32071] |   |
| <b>LDLRAD3</b> | Low density lipoprotein receptor class A domain containing 3 [Source:HGNC Symbol;Acc:27046] |   |
| <b>LDLRAP1</b> | Low density lipoprotein receptor adaptor protein 1 [Source:HGNC Symbol;Acc:18640]           |   |
| <b>LEAP2</b>   | Liver expressed antimicrobial peptide 2 [Source:HGNC Symbol;Acc:29571]                      |   |
| <b>LEMD1</b>   | LEM domain containing 1 [Source:HGNC Symbol;Acc:18725]                                      |   |
| <b>LEP</b>     | Leptin [Source:HGNC Symbol;Acc:6553]                                                        |   |
| <b>LEPR</b>    | Leptin receptor [Source:HGNC Symbol;Acc:6554]                                               |   |

|                 |                                                                                            |   |
|-----------------|--------------------------------------------------------------------------------------------|---|
| <b>LEPRE1</b>   | Leucine proline-enriched proteoglycan (leprecan) 1 [Source:HGNC Symbol;Acc:19316]          |   |
| <b>LEPREL1</b>  | Leprecan-like 1 [Source:HGNC Symbol;Acc:19317]                                             |   |
| <b>LEPREL2</b>  | Leprecan-like 2 [Source:HGNC Symbol;Acc:19318]                                             |   |
| <b>LETMD1</b>   | LETM1 domain containing 1 [Source:HGNC Symbol;Acc:24241]                                   |   |
| <b>LGALS12</b>  | Lectin, galactoside-binding, soluble, 12 [Source:HGNC Symbol;Acc:15788]                    |   |
| <b>LGALS3BP</b> | Lectin, galactoside-binding, soluble, 3 binding protein [Source:HGNC Symbol;Acc:6564]      |   |
| <b>LGALS4</b>   | Lectin, galactoside-binding, soluble, 4 [Source:HGNC Symbol;Acc:6565]                      |   |
| <b>LGALS9</b>   | Lectin, galactoside-binding, soluble, 9 [Source:HGNC Symbol;Acc:6570]                      |   |
| <b>LGALS9C</b>  | Lectin, galactoside-binding, soluble, 9C [Source:HGNC Symbol;Acc:33874]                    |   |
| <b>LGI2</b>     | Leucine-rich repeat LGI family, member 2 [Source:HGNC Symbol;Acc:18710]                    |   |
| <b>LGMN</b>     | Legumain [Source:HGNC Symbol;Acc:9472]                                                     |   |
| <b>LGR4</b>     | Leucine-rich repeat containing G protein-coupled receptor 4 [Source:HGNC Symbol;Acc:13299] |   |
| <b>LHCGR</b>    | Luteinizing hormone/choriogonadotropin receptor [Source:HGNC Symbol;Acc:6585]              |   |
| <b>LHFPL2</b>   | Lipoma HMGIC fusion partner-like 2 [Source:HGNC Symbol;Acc:6588]                           |   |
| <b>LHFPL3</b>   | Lipoma HMGIC fusion partner-like 3 [Source:HGNC Symbol;Acc:6589]                           |   |
| <b>LHX4</b>     | LIM homeobox 4 [Source:HGNC Symbol;Acc:21734]                                              |   |
| <b>LHX6</b>     | LIM homeobox 6 [Source:HGNC Symbol;Acc:21735]                                              |   |
| <b>LHX8</b>     | LIM homeobox 8 [Source:HGNC Symbol;Acc:28838]                                              |   |
| <b>LIFR</b>     | Leukemia inhibitory factor receptor alpha                                                  | √ |
| <b>LIMD1</b>    | LIM domains containing 1 [Source:HGNC Symbol;Acc:6612]                                     |   |
| <b>LIME1</b>    | Lck interacting transmembrane adaptor 1 [Source:HGNC Symbol;Acc:26016]                     |   |
| <b>LIMS1</b>    | LIM and senescent cell antigen-like domains 1 [Source:HGNC Symbol;Acc:6616]                |   |
| <b>LIN28B</b>   | Lin-28 homolog B (C. Elegans) [Source:HGNC Symbol;Acc:32207]                               |   |
| <b>LIN37</b>    | Lin-37 homolog (C. Elegans) [Source:HGNC Symbol;Acc:33234]                                 |   |
| <b>LIN54</b>    | Lin-54 homolog (C. Elegans) [Source:HGNC Symbol;Acc:25397]                                 |   |
| <b>LIN7A</b>    | Lin-7 homolog A (C. Elegans) [Source:HGNC Symbol;Acc:17787]                                |   |

|                 |                                                                                  |  |
|-----------------|----------------------------------------------------------------------------------|--|
| <b>LIPA</b>     | Lipase A, lysosomal acid, cholesterol esterase [Source:HGNC Symbol;Acc:6617]     |  |
| <b>LIPF</b>     | Lipase, gastric [Source:HGNC Symbol;Acc:6622]                                    |  |
| <b>LITAF</b>    | Lipopolysaccharide-induced TNF factor [Source:HGNC Symbol;Acc:16841]             |  |
| <b>LIX1L</b>    | Lix1 homolog (mouse)-like [Source:HGNC Symbol;Acc:28715]                         |  |
| <b>LMAN1</b>    | Lectin, mannose-binding, 1 [Source:HGNC Symbol;Acc:6631]                         |  |
| <b>LMAN2L</b>   | Lectin, mannose-binding 2-like [Source:HGNC Symbol;Acc:19263]                    |  |
| <b>LMBRD1</b>   | LMBR1 domain containing 1 [Source:HGNC Symbol;Acc:23038]                         |  |
| <b>LMCD1</b>    | LIM and cysteine-rich domains 1 [Source:HGNC Symbol;Acc:6633]                    |  |
| <b>LMLN</b>     | Leishmanolysin-like (metallopeptidase M8 family) [Source:HGNC Symbol;Acc:15991]  |  |
| <b>LMO3</b>     | LIM domain only 3 (rhombotin-like 2) [Source:HGNC Symbol;Acc:6643]               |  |
| <b>LMO4</b>     | LIM domain only 4 [Source:HGNC Symbol;Acc:6644]                                  |  |
| <b>LMO7</b>     | LIM domain 7 [Source:HGNC Symbol;Acc:6646]                                       |  |
| <b>LMOD1</b>    | Leiomodin 1 (smooth muscle) [Source:HGNC Symbol;Acc:6647]                        |  |
| <b>LMOD3</b>    | Leiomodin 3 (fetal) [Source:HGNC Symbol;Acc:6649]                                |  |
| <b>LMTK2</b>    | Lemur tyrosine kinase 2 [Source:HGNC Symbol;Acc:17880]                           |  |
| <b>LMX1A</b>    | LIM homeobox transcription factor 1, alpha [Source:HGNC Symbol;Acc:6653]         |  |
| <b>LMX1B</b>    | LIM homeobox transcription factor 1, beta [Source:HGNC Symbol;Acc:6654]          |  |
| <b>LOH12CR2</b> | Loss of heterozygosity, 12, chromosomal region 2 [Source:HGNC Symbol;Acc:26524]  |  |
| <b>LONP1</b>    | Lon peptidase 1, mitochondrial [Source:HGNC Symbol;Acc:9479]                     |  |
| <b>LONRF1</b>   | LON peptidase N-terminal domain and ring finger 1 [Source:HGNC Symbol;Acc:26302] |  |
| <b>LONRF2</b>   | LON peptidase N-terminal domain and ring finger 2 [Source:HGNC Symbol;Acc:24788] |  |
| <b>LONRF3</b>   | LON peptidase N-terminal domain and ring finger 3 [Source:HGNC Symbol;Acc:21152] |  |
| <b>LOX</b>      | Lysyl oxidase [Source:HGNC Symbol;Acc:6664]                                      |  |
| <b>LOXL3</b>    | Lysyl oxidase-like 3 [Source:HGNC Symbol;Acc:13869]                              |  |

|               |                                                                                                     |   |
|---------------|-----------------------------------------------------------------------------------------------------|---|
| <b>LOXL4</b>  | Lysyl oxidase-like 4 [Source:HGNC Symbol;Acc:17171]                                                 |   |
| <b>LPA</b>    | Lipoprotein, Lp(a) [Source:HGNC Symbol;Acc:6667]                                                    |   |
| <b>LPAR2</b>  | Lysophosphatidic acid receptor 2 [Source:HGNC Symbol;Acc:3168]                                      |   |
| <b>LPCAT1</b> | Lysophosphatidylcholine acyltransferase 1 [Source:HGNC Symbol;Acc:25718]                            |   |
| <b>LPCAT4</b> | Lysophosphatidylcholine acyltransferase 4 [Source:HGNC Symbol;Acc:30059]                            |   |
| <b>LPGAT1</b> | Lysophosphatidylglycerol acyltransferase 1 [Source:HGNC Symbol;Acc:28985]                           |   |
| <b>LPHN3</b>  | Latrophilin 3 [Source:HGNC Symbol;Acc:20974]                                                        |   |
| <b>LPIN1</b>  | Lipin 1 [Source:HGNC Symbol;Acc:13345]                                                              |   |
| <b>LPIN2</b>  | Lipin 2 [Source:HGNC Symbol;Acc:14450]                                                              |   |
| <b>LPIN3</b>  | Lipin 3 [Source:HGNC Symbol;Acc:14451]                                                              |   |
| <b>LPL</b>    | Lipoprotein lipase [Source:HGNC Symbol;Acc:6677]                                                    |   |
| <b>LPO</b>    | Lactoperoxidase [Source:HGNC Symbol;Acc:6678]                                                       |   |
| <b>LPP</b>    | LIM domain containing preferred translocation partner in lipoma                                     | √ |
| <b>LPXN</b>   | Leupaxin [Source:HGNC Symbol;Acc:14061]                                                             |   |
| <b>LRBA</b>   | LPS-responsive vesicle trafficking, beach and anchor containing [Source:HGNC Symbol;Acc:1742]       |   |
| <b>LRDD</b>   | Leucine-rich repeats and death domain containing [Source:HGNC Symbol;Acc:16491]                     |   |
| <b>LRFN1</b>  | Leucine rich repeat and fibronectin type III domain containing 1 [Source:HGNC Symbol;Acc:29290]     |   |
| <b>LRFN2</b>  | Leucine rich repeat and fibronectin type III domain containing 2 [Source:HGNC Symbol;Acc:21226]     |   |
| <b>LRGUK</b>  | Leucine-rich repeats and guanylate kinase domain containing [Source:HGNC Symbol;Acc:21964]          |   |
| <b>LRIG1</b>  | Leucine-rich repeats and immunoglobulin-like domains 1 [Source:HGNC Symbol;Acc:17360]               |   |
| <b>LRIT3</b>  | Leucine-rich repeat, immunoglobulin-like and transmembrane domains 3 [Source:HGNC Symbol;Acc:24783] |   |
| <b>LRP1</b>   | Low density lipoprotein receptor-related protein 1 [Source:HGNC Symbol;Acc:6692]                    |   |



|                |                                                                                                             |  |
|----------------|-------------------------------------------------------------------------------------------------------------|--|
| <b>LRP10</b>   | Low density lipoprotein receptor-related protein 10 [Source:HGNC Symbol;Acc:14553]                          |  |
| <b>LRP11</b>   | Low density lipoprotein receptor-related protein 11 [Source:HGNC Symbol;Acc:16936]                          |  |
| <b>LRP12</b>   | Low density lipoprotein receptor-related protein 12 [Source:HGNC Symbol;Acc:31708]                          |  |
| <b>LRP1B</b>   | Low density lipoprotein receptor-related protein 1B [Source:HGNC Symbol;Acc:6693]                           |  |
| <b>LRP2</b>    | Low density lipoprotein receptor-related protein 2 [Source:HGNC Symbol;Acc:6694]                            |  |
| <b>LRP2BP</b>  | LRP2 binding protein [Source:HGNC Symbol;Acc:25434]                                                         |  |
| <b>LRP4</b>    | Low density lipoprotein receptor-related protein 4 [Source:HGNC Symbol;Acc:6696]                            |  |
| <b>LRP6</b>    | Low density lipoprotein receptor-related protein 6 [Source:HGNC Symbol;Acc:6698]                            |  |
| <b>LRP8</b>    | Low density lipoprotein receptor-related protein 8, apolipoprotein e receptor [Source:HGNC Symbol;Acc:6700] |  |
| <b>LRPAP1</b>  | Low density lipoprotein receptor-related protein associated protein 1 [Source:HGNC Symbol;Acc:6701]         |  |
| <b>LRR1</b>    | Leucine rich repeat protein 1 [Source:HGNC Symbol;Acc:19742]                                                |  |
| <b>LRRC1</b>   | Leucine rich repeat containing 1 [Source:HGNC Symbol;Acc:14307]                                             |  |
| <b>LRRC10</b>  | Leucine rich repeat containing 10 [Source:HGNC Symbol;Acc:20264]                                            |  |
| <b>LRRC15</b>  | Leucine rich repeat containing 15 [Source:HGNC Symbol;Acc:20818]                                            |  |
| <b>LRRC16A</b> | Leucine rich repeat containing 16A [Source:HGNC Symbol;Acc:21581]                                           |  |
| <b>LRRC19</b>  | Leucine rich repeat containing 19 [Source:HGNC Symbol;Acc:23379]                                            |  |
| <b>LRRC25</b>  | Leucine rich repeat containing 25 [Source:HGNC Symbol;Acc:29806]                                            |  |
| <b>LRRC27</b>  | Leucine rich repeat containing 27 [Source:HGNC Symbol;Acc:29346]                                            |  |
| <b>LRRC28</b>  | Leucine rich repeat containing 28 [Source:HGNC Symbol;Acc:28355]                                            |  |
| <b>LRRC29</b>  | Leucine rich repeat containing 29 [Source:HGNC Symbol;Acc:13605]                                            |  |
| <b>LRRC31</b>  | Leucine rich repeat containing 31 [Source:HGNC Symbol;Acc:26261]                                            |  |
| <b>LRRC36</b>  | Leucine rich repeat containing 36 [Source:HGNC Symbol;Acc:25615]                                            |  |
| <b>LRRC37A</b> | Leucine rich repeat containing 37A [Source:HGNC Symbol;Acc:29069]                                           |  |
| <b>LRRC38</b>  | Leucine rich repeat containing 38 [Source:HGNC Symbol;Acc:27005]                                            |  |

|                |                                                                                                       |  |
|----------------|-------------------------------------------------------------------------------------------------------|--|
| <b>LRRC49</b>  | Leucine rich repeat containing 49 [Source:HGNC Symbol;Acc:25965]                                      |  |
| <b>LRRC4C</b>  | Leucine rich repeat containing 4C [Source:HGNC Symbol;Acc:29317]                                      |  |
| <b>LRRC58</b>  | Leucine rich repeat containing 58 [Source:HGNC Symbol;Acc:26968]                                      |  |
| <b>LRRC59</b>  | Leucine rich repeat containing 59 [Source:HGNC Symbol;Acc:28817]                                      |  |
| <b>LRRC66</b>  | Leucine rich repeat containing 66 [Source:HGNC Symbol;Acc:34299]                                      |  |
| <b>LRRC7</b>   | Leucine rich repeat containing 7 [Source:HGNC Symbol;Acc:18531]                                       |  |
| <b>LRRC70</b>  | Leucine rich repeat containing 70 [Source:HGNC Symbol;Acc:35155]                                      |  |
| <b>LRRC8A</b>  | Leucine rich repeat containing 8 family, member A [Source:HGNC Symbol;Acc:19027]                      |  |
| <b>LRRC8D</b>  | Leucine rich repeat containing 8 family, member D [Source:HGNC Symbol;Acc:16992]                      |  |
| <b>LRRC8E</b>  | Leucine rich repeat containing 8 family, member E [Source:HGNC Symbol;Acc:26272]                      |  |
| <b>LRRFIP1</b> | Leucine rich repeat (in FLII) interacting protein 1 [Source:HGNC Symbol;Acc:6702]                     |  |
| <b>LRRFIP2</b> | Leucine rich repeat (in FLII) interacting protein 2 [Source:HGNC Symbol;Acc:6703]                     |  |
| <b>LRRIQ3</b>  | Leucine-rich repeats and IQ motif containing 3 [Source:HGNC Symbol;Acc:28318]                         |  |
| <b>LRRK2</b>   | Leucine-rich repeat kinase 2 [Source:HGNC Symbol;Acc:18618]                                           |  |
| <b>LRRN1</b>   | Leucine rich repeat neuronal 1 [Source:HGNC Symbol;Acc:20980]                                         |  |
| <b>LRRN2</b>   | Leucine rich repeat neuronal 2 [Source:HGNC Symbol;Acc:16914]                                         |  |
| <b>LRRN3</b>   | Leucine rich repeat neuronal 3 [Source:HGNC Symbol;Acc:17200]                                         |  |
| <b>LRTOMT</b>  | Leucine rich transmembrane and O-methyltransferase domain containing [Source:HGNC Symbol;Acc:25033]   |  |
| <b>LRWD1</b>   | Leucine-rich repeats and WD repeat domain containing 1 [Source:HGNC Symbol;Acc:21769]                 |  |
| <b>LSAMP</b>   | Limbic system-associated membrane protein [Source:HGNC Symbol;Acc:6705]                               |  |
| <b>LSM11</b>   | LSM11, U7 small nuclear RNA associated [Source:HGNC Symbol;Acc:30860]                                 |  |
| <b>LSM6</b>    | LSM6 homolog, U6 small nuclear RNA associated ( <i>S. Cerevisiae</i> ) [Source:HGNC Symbol;Acc:17017] |  |

|               |                                                                                          |  |
|---------------|------------------------------------------------------------------------------------------|--|
| <b>LSS</b>    | Lanosterol synthase (2,3-oxidosqualene-lanosterol cyclase) [Source:HGNC Symbol;Acc:6708] |  |
| <b>LTB4R</b>  | Leukotriene B4 receptor [Source:HGNC Symbol;Acc:6713]                                    |  |
| <b>LTBP1</b>  | Latent transforming growth factor beta binding protein 1 [Source:HGNC Symbol;Acc:6714]   |  |
| <b>LTBP2</b>  | Latent transforming growth factor beta binding protein 2 [Source:HGNC Symbol;Acc:6715]   |  |
| <b>LTBP3</b>  | Latent transforming growth factor beta binding protein 3 [Source:HGNC Symbol;Acc:6716]   |  |
| <b>LTBP4</b>  | Latent transforming growth factor beta binding protein 4 [Source:HGNC Symbol;Acc:6717]   |  |
| <b>LTF</b>    | Lactotransferrin [Source:HGNC Symbol;Acc:6720]                                           |  |
| <b>LTK</b>    | Leukocyte receptor tyrosine kinase [Source:HGNC Symbol;Acc:6721]                         |  |
| <b>LTV1</b>   | LTV1 homolog ( <i>S. Cerevisiae</i> ) [Source:HGNC Symbol;Acc:21173]                     |  |
| <b>LUZP1</b>  | Leucine zipper protein 1 [Source:HGNC Symbol;Acc:14985]                                  |  |
| <b>LY6G6E</b> | Lymphocyte antigen 6 complex, locus G6E [Source:HGNC Symbol;Acc:13934]                   |  |
| <b>LY75</b>   | Lymphocyte antigen 75 [Source:HGNC Symbol;Acc:6729]                                      |  |
| <b>LYG1</b>   | Lysozyme G-like 1 [Source:HGNC Symbol;Acc:27014]                                         |  |
| <b>LYG2</b>   | Lysozyme G-like 2 [Source:HGNC Symbol;Acc:29615]                                         |  |
| <b>LYN</b>    | V-yes-1 Yamaguchi sarcoma viral related oncogene homolog [Source:HGNC Symbol;Acc:6735]   |  |
| <b>LYNX1</b>  | Ly6/neurotoxin 1 [Source:HGNC Symbol;Acc:29604]                                          |  |
| <b>LYPLA2</b> | Lysophospholipase II [Source:HGNC Symbol;Acc:6738]                                       |  |
| <b>LYRM2</b>  | LYR motif containing 2 [Source:HGNC Symbol;Acc:25229]                                    |  |
| <b>LYRM4</b>  | LYR motif containing 4 [Source:HGNC Symbol;Acc:21365]                                    |  |
| <b>LYSMD1</b> | Lysm, putative peptidoglycan-binding, domain containing 1 [Source:HGNC Symbol;Acc:32070] |  |
| <b>LYSMD3</b> | Lysm, putative peptidoglycan-binding, domain containing 3 [Source:HGNC Symbol;Acc:26969] |  |
| <b>LYST</b>   | Lysosomal trafficking regulator [Source:HGNC Symbol;Acc:1968]                            |  |
| <b>LYVE1</b>  | Lymphatic vessel endothelial hyaluronan receptor 1 [Source:HGNC Symbol;Acc:14687]        |  |

|                |                                                                                                        |   |
|----------------|--------------------------------------------------------------------------------------------------------|---|
| <b>LYZL1</b>   | Lysozyme-like 1 [Source:HGNC Symbol;Acc:30502]                                                         |   |
| <b>LYZL2</b>   | Lysozyme-like 2 [Source:HGNC Symbol;Acc:29613]                                                         |   |
| <b>LZTS1</b>   | Leucine zipper, putative tumor suppressor 1 [Source:HGNC Symbol;Acc:13861]                             |   |
| <b>LZTS2</b>   | Leucine zipper, putative tumor suppressor 2 [Source:HGNC Symbol;Acc:29381]                             |   |
| <b>MAB21L1</b> | Mab-21-like 1 (C. Elegans) [Source:HGNC Symbol;Acc:6757]                                               |   |
| <b>MACF1</b>   | Microtubule-actin crosslinking factor 1 [Source:HGNC Symbol;Acc:13664]                                 |   |
| <b>MADD</b>    | MAP-kinase activating death domain [Source:HGNC Symbol;Acc:6766]                                       |   |
| <b>MAF</b>     | V-maf musculoaponeurotic fibrosarcoma oncogene homolog (avian)                                         | √ |
| <b>MAFG</b>    | V-maf musculoaponeurotic fibrosarcoma oncogene homolog G (avian)<br>[Source:HGNC Symbol;Acc:6781]      |   |
| <b>MAGEA1</b>  | Melanoma antigen family A, 1 (directs expression of antigen MZ2-E)<br>[Source:HGNC Symbol;Acc:6796]    |   |
| <b>MAGEA10</b> | Melanoma antigen family A, 10 [Source:HGNC Symbol;Acc:6797]                                            |   |
| <b>MAGEA4</b>  | Melanoma antigen family A, 4 [Source:HGNC Symbol;Acc:6802]                                             |   |
| <b>MAGEA9</b>  | Melanoma antigen family A, 9 [Source:HGNC Symbol;Acc:6807]                                             |   |
| <b>MAGEA9B</b> | Melanoma antigen family A, 9B [Source:HGNC Symbol;Acc:31909]                                           |   |
| <b>MAGEB16</b> | Melanoma antigen family B, 16 [Source:HGNC Symbol;Acc:21188]                                           |   |
| <b>MAGEB2</b>  | Melanoma antigen family B, 2 [Source:HGNC Symbol;Acc:6809]                                             |   |
| <b>MAGEB3</b>  | Melanoma antigen family B, 3 [Source:HGNC Symbol;Acc:6810]                                             |   |
| <b>MAGEB6</b>  | Melanoma antigen family B, 6 [Source:HGNC Symbol;Acc:23796]                                            |   |
| <b>MAGEC1</b>  | Melanoma antigen family C, 1 [Source:HGNC Symbol;Acc:6812]                                             |   |
| <b>MAGEC3</b>  | Melanoma antigen family C, 3 [Source:HGNC Symbol;Acc:23798]                                            |   |
| <b>MAGEE1</b>  | Melanoma antigen family E, 1 [Source:HGNC Symbol;Acc:24934]                                            |   |
| <b>MAGEE2</b>  | Melanoma antigen family E, 2 [Source:HGNC Symbol;Acc:24935]                                            |   |
| <b>MAGEL2</b>  | MAGE-like 2 [Source:HGNC Symbol;Acc:6814]                                                              |   |
| <b>MAGI3</b>   | Membrane associated guanylate kinase, WW and PDZ domain containing 3<br>[Source:HGNC Symbol;Acc:29647] |   |
| <b>MAK</b>     | Male germ cell-associated kinase [Source:HGNC Symbol;Acc:6816]                                         |   |
| <b>MAK16</b>   | MAK16 homolog (S. Cerevisiae) [Source:HGNC Symbol;Acc:13703]                                           |   |
| <b>MALT1</b>   | Mucosa associated lymphoid tissue lymphoma translocation gene 1                                        | √ |
| <b>MAMDC2</b>  | MAM domain containing 2 [Source:HGNC Symbol;Acc:23673]                                                 |   |

|                |                                                                                 |   |
|----------------|---------------------------------------------------------------------------------|---|
| <b>MAML1</b>   | Mastermind-like 1 (Drosophila) [Source:HGNC Symbol;Acc:13632]                   |   |
| <b>MAML2</b>   | Mastermind-like 2 (Drosophila)                                                  | √ |
| <b>MAN1A1</b>  | Mannosidase, alpha, class 1A, member 1 [Source:HGNC Symbol;Acc:6821]            |   |
| <b>MAN1A2</b>  | Mannosidase, alpha, class 1A, member 2 [Source:HGNC Symbol;Acc:6822]            |   |
| <b>MAN1B1</b>  | Mannosidase, alpha, class 1B, member 1 [Source:HGNC Symbol;Acc:6823]            |   |
| <b>MAN1C1</b>  | Mannosidase, alpha, class 1C, member 1 [Source:HGNC Symbol;Acc:19080]           |   |
| <b>MAN2A1</b>  | Mannosidase, alpha, class 2A, member 1 [Source:HGNC Symbol;Acc:6824]            |   |
| <b>MAN2B2</b>  | Mannosidase, alpha, class 2B, member 2 [Source:HGNC Symbol;Acc:29623]           |   |
| <b>MAN2C1</b>  | Mannosidase, alpha, class 2C, member 1 [Source:HGNC Symbol;Acc:6827]            |   |
| <b>MANBA</b>   | Mannosidase, beta A, lysosomal [Source:HGNC Symbol;Acc:6831]                    |   |
| <b>MAOA</b>    | Monoamine oxidase A [Source:HGNC Symbol;Acc:6833]                               |   |
| <b>MAP1B</b>   | Microtubule-associated protein 1B [Source:HGNC Symbol;Acc:6836]                 |   |
| <b>MAP1S</b>   | Microtubule-associated protein 1S [Source:HGNC Symbol;Acc:15715]                |   |
| <b>MAP2</b>    | Microtubule-associated protein 2 [Source:HGNC Symbol;Acc:6839]                  |   |
| <b>MAP2K1</b>  | Mitogen-activated protein kinase kinase 1                                       | √ |
| <b>MAP2K3</b>  | Mitogen-activated protein kinase kinase 3 [Source:HGNC Symbol;Acc:6843]         |   |
| <b>MAP2K5</b>  | Mitogen-activated protein kinase kinase 5 [Source:HGNC Symbol;Acc:6845]         |   |
| <b>MAP3K1</b>  | Mitogen-activated protein kinase kinase kinase 1 [Source:HGNC Symbol;Acc:6848]  |   |
| <b>MAP3K10</b> | Mitogen-activated protein kinase kinase kinase 10 [Source:HGNC Symbol;Acc:6849] |   |
| <b>MAP3K12</b> | Mitogen-activated protein kinase kinase kinase 12 [Source:HGNC Symbol;Acc:6851] |   |

|                |                                                                                       |  |
|----------------|---------------------------------------------------------------------------------------|--|
| <b>MAP3K13</b> | Mitogen-activated protein kinase kinase kinase 13 [Source:HGNC Symbol;Acc:6852]       |  |
| <b>MAP3K14</b> | Mitogen-activated protein kinase kinase kinase 14 [Source:HGNC Symbol;Acc:6853]       |  |
| <b>MAP3K2</b>  | Mitogen-activated protein kinase kinase kinase 2 [Source:HGNC Symbol;Acc:6854]        |  |
| <b>MAP3K3</b>  | Mitogen-activated protein kinase kinase kinase 3 [Source:HGNC Symbol;Acc:6855]        |  |
| <b>MAP3K4</b>  | Mitogen-activated protein kinase kinase kinase 4 [Source:HGNC Symbol;Acc:6856]        |  |
| <b>MAP3K5</b>  | Mitogen-activated protein kinase kinase kinase 5 [Source:HGNC Symbol;Acc:6857]        |  |
| <b>MAP3K6</b>  | Mitogen-activated protein kinase kinase kinase 6 [Source:HGNC Symbol;Acc:6858]        |  |
| <b>MAP3K9</b>  | Mitogen-activated protein kinase kinase kinase 9 [Source:HGNC Symbol;Acc:6861]        |  |
| <b>MAP4K1</b>  | Mitogen-activated protein kinase kinase kinase kinase 1 [Source:HGNC Symbol;Acc:6863] |  |
| <b>MAP4K2</b>  | Mitogen-activated protein kinase kinase kinase kinase 2 [Source:HGNC Symbol;Acc:6864] |  |
| <b>MAP4K3</b>  | Mitogen-activated protein kinase kinase kinase kinase 3 [Source:HGNC Symbol;Acc:6865] |  |
| <b>MAP4K5</b>  | Mitogen-activated protein kinase kinase kinase kinase 5 [Source:HGNC Symbol;Acc:6867] |  |
| <b>MAP7</b>    | Microtubule-associated protein 7 [Source:HGNC Symbol;Acc:6869]                        |  |
| <b>MAP9</b>    | Microtubule-associated protein 9 [Source:HGNC Symbol;Acc:26118]                       |  |
| <b>MAPK1</b>   | Mitogen-activated protein kinase 1 [Source:HGNC Symbol;Acc:6871]                      |  |
| <b>MAPK10</b>  | Mitogen-activated protein kinase 10 [Source:HGNC Symbol;Acc:6872]                     |  |
| <b>MAPK11</b>  | Mitogen-activated protein kinase 11 [Source:HGNC Symbol;Acc:6873]                     |  |
| <b>MAPK12</b>  | Mitogen-activated protein kinase 12 [Source:HGNC Symbol;Acc:6874]                     |  |
| <b>MAPK13</b>  | Mitogen-activated protein kinase 13 [Source:HGNC Symbol;Acc:6875]                     |  |
| <b>MAPK15</b>  | Mitogen-activated protein kinase 15 [Source:HGNC Symbol;Acc:24667]                    |  |
| <b>MAPK6</b>   | Mitogen-activated protein kinase 6 [Source:HGNC Symbol;Acc:6879]                      |  |

|                 |                                                                                           |  |
|-----------------|-------------------------------------------------------------------------------------------|--|
| <b>MAPK8</b>    | Mitogen-activated protein kinase 8 [Source:HGNC Symbol;Acc:6881]                          |  |
| <b>MAPK8IP1</b> | Mitogen-activated protein kinase 8 interacting protein 1 [Source:HGNC Symbol;Acc:6882]    |  |
| <b>MAPK8IP2</b> | Mitogen-activated protein kinase 8 interacting protein 2 [Source:HGNC Symbol;Acc:6883]    |  |
| <b>MAPK8IP3</b> | Mitogen-activated protein kinase 8 interacting protein 3 [Source:HGNC Symbol;Acc:6884]    |  |
| <b>MAPKAPK5</b> | Mitogen-activated protein kinase-activated protein kinase 5 [Source:HGNC Symbol;Acc:6889] |  |
| <b>MAPKBP1</b>  | Mitogen-activated protein kinase binding protein 1 [Source:HGNC Symbol;Acc:29536]         |  |
| <b>MAPRE2</b>   | Microtubule-associated protein, RP/EB family, member 2 [Source:HGNC Symbol;Acc:6891]      |  |
| <b>MARCH10</b>  | Septin 7 [Source:HGNC Symbol;Acc:1717]                                                    |  |
| <b>MARCH11</b>  | Septin 7 [Source:HGNC Symbol;Acc:1717]                                                    |  |
| <b>MARCH12</b>  | Septin 7 [Source:HGNC Symbol;Acc:1717]                                                    |  |
| <b>MARCH13</b>  | Septin 10 [Source:HGNC Symbol;Acc:14349]                                                  |  |
| <b>MARCH14</b>  | Septin 10 [Source:HGNC Symbol;Acc:14349]                                                  |  |
| <b>MARCH15</b>  | Septin 10 [Source:HGNC Symbol;Acc:14349]                                                  |  |
| <b>MARCH16</b>  | Septin 10 [Source:HGNC Symbol;Acc:14349]                                                  |  |
| <b>MARCH17</b>  | Septin 10 [Source:HGNC Symbol;Acc:14349]                                                  |  |
| <b>MARCH18</b>  | Septin 10 [Source:HGNC Symbol;Acc:14349]                                                  |  |
| <b>MARCH19</b>  | Septin 10 [Source:HGNC Symbol;Acc:14349]                                                  |  |
| <b>MARCH20</b>  | Septin 10 [Source:HGNC Symbol;Acc:14349]                                                  |  |
| <b>MARCH21</b>  | Septin 11 [Source:HGNC Symbol;Acc:25589]                                                  |  |
| <b>MARCH22</b>  | Septin 14 [Source:HGNC Symbol;Acc:33280]                                                  |  |
| <b>MARCH3</b>   | Membrane-associated ring finger (C3HC4) 3 [Source:HGNC Symbol;Acc:28728]                  |  |
| <b>MARCH4</b>   | Membrane-associated ring finger (C3HC4) 8 [Source:HGNC Symbol;Acc:23356]                  |  |
| <b>MARCH5</b>   | Membrane-associated ring finger (C3HC4) 9 [Source:HGNC Symbol;Acc:25139]                  |  |

|                 |                                                                                               |   |
|-----------------|-----------------------------------------------------------------------------------------------|---|
| <b>MARCH6</b>   | Membrane-associated ring finger (C3HC4) 11 [Source:HGNC Symbol;Acc:33609]                     |   |
| <b>MARCH7</b>   | Septin 3 [Source:HGNC Symbol;Acc:10750]                                                       |   |
| <b>MARCH8</b>   | Septin 3 [Source:HGNC Symbol;Acc:10750]                                                       |   |
| <b>MARCH9</b>   | Septin 5 [Source:HGNC Symbol;Acc:9164]                                                        |   |
| <b>MARCKS</b>   | Myristoylated alanine-rich protein kinase C substrate [Source:HGNC Symbol;Acc:6759]           |   |
| <b>MARCO</b>    | Macrophage receptor with collagenous structure [Source:HGNC Symbol;Acc:6895]                  |   |
| <b>MARK1</b>    | MAP/microtubule affinity-regulating kinase 1 [Source:HGNC Symbol;Acc:6896]                    |   |
| <b>MARS</b>     | Methionyl-trna synthetase [Source:HGNC Symbol;Acc:6898]                                       |   |
| <b>MARVELD2</b> | MARVEL domain containing 2 [Source:HGNC Symbol;Acc:26401]                                     |   |
| <b>MAST1</b>    | Microtubule associated serine/threonine kinase 1 [Source:HGNC Symbol;Acc:19034]               |   |
| <b>MAST3</b>    | Microtubule associated serine/threonine kinase 3 [Source:HGNC Symbol;Acc:19036]               |   |
| <b>MAST4</b>    | Microtubule associated serine/threonine kinase family member 4 [Source:HGNC Symbol;Acc:19037] |   |
| <b>MASTL</b>    | Microtubule associated serine/threonine kinase-like [Source:HGNC Symbol;Acc:19042]            |   |
| <b>MAT1A</b>    | Methionine adenosyltransferase I, alpha [Source:HGNC Symbol;Acc:6903]                         |   |
| <b>MAT2A</b>    | Methionine adenosyltransferase II, alpha [Source:HGNC Symbol;Acc:6904]                        |   |
| <b>MATN1</b>    | Matrilin 1, cartilage matrix protein [Source:HGNC Symbol;Acc:6907]                            |   |
| <b>MATN2</b>    | Matrilin 2 [Source:HGNC Symbol;Acc:6908]                                                      |   |
| <b>MATN3</b>    | Matrilin 3 [Source:HGNC Symbol;Acc:6909]                                                      |   |
| <b>MAU2</b>     | MAU2 chromatid cohesion factor homolog (C. Elegans) [Source:HGNC Symbol;Acc:29140]            |   |
| <b>MAX</b>      | MYC associated factor X                                                                       | √ |
| <b>MB</b>       | Myoglobin [Source:HGNC Symbol;Acc:6915]                                                       |   |
| <b>MBD1</b>     | Methyl-cpg binding domain protein 1 [Source:HGNC Symbol;Acc:6916]                             |   |
| <b>MBD3</b>     | Methyl-cpg binding domain protein 3 [Source:HGNC Symbol;Acc:6918]                             |   |
| <b>MBNL1</b>    | Muscleblind-like (Drosophila) [Source:HGNC Symbol;Acc:6923]                                   |   |



|               |                                                                                                 |  |
|---------------|-------------------------------------------------------------------------------------------------|--|
| <b>MBNL3</b>  | Muscleblind-like 3 (Drosophila) [Source:HGNC Symbol;Acc:20564]                                  |  |
| <b>MBP</b>    | Myelin basic protein [Source:HGNC Symbol;Acc:6925]                                              |  |
| <b>MBTD1</b>  | Mbt domain containing 1 [Source:HGNC Symbol;Acc:19866]                                          |  |
| <b>MBTPS1</b> | Membrane-bound transcription factor peptidase, site 1 [Source:HGNC Symbol;Acc:15456]            |  |
| <b>MC2R</b>   | Melanocortin 2 receptor (adrenocorticotropic hormone) [Source:HGNC Symbol;Acc:6930]             |  |
| <b>MCAM</b>   | Melanoma cell adhesion molecule [Source:HGNC Symbol;Acc:6934]                                   |  |
| <b>MCART1</b> | Mitochondrial carrier triple repeat 1 [Source:HGNC Symbol;Acc:23323]                            |  |
| <b>MCC</b>    | Mutated in colorectal cancers [Source:HGNC Symbol;Acc:6935]                                     |  |
| <b>MCCC1</b>  | Methylcrotonoyl-coa carboxylase 1 (alpha) [Source:HGNC Symbol;Acc:6936]                         |  |
| <b>MCF2L2</b> | MCF.2 cell line derived transforming sequence-like 2 [Source:HGNC Symbol;Acc:30319]             |  |
| <b>MCFD2</b>  | Multiple coagulation factor deficiency 2 [Source:HGNC Symbol;Acc:18451]                         |  |
| <b>MCHR1</b>  | Melanin-concentrating hormone receptor 1 [Source:HGNC Symbol;Acc:4479]                          |  |
| <b>MCHR2</b>  | Melanin-concentrating hormone receptor 2 [Source:HGNC Symbol;Acc:20867]                         |  |
| <b>MCL1</b>   | Myeloid cell leukemia sequence 1 (BCL2-related) [Source:HGNC Symbol;Acc:6943]                   |  |
| <b>MCM10</b>  | Minichromosome maintenance complex component 10 [Source:HGNC Symbol;Acc:18043]                  |  |
| <b>MCM3AP</b> | Minichromosome maintenance complex component 3 associated protein [Source:HGNC Symbol;Acc:6946] |  |
| <b>MCM4</b>   | Minichromosome maintenance complex component 4 [Source:HGNC Symbol;Acc:6947]                    |  |
| <b>MCM6</b>   | Minichromosome maintenance complex component 6 [Source:HGNC Symbol;Acc:6949]                    |  |
| <b>MCM7</b>   | Minichromosome maintenance complex component 7 [Source:HGNC Symbol;Acc:6950]                    |  |
| <b>MCM8</b>   | Minichromosome maintenance complex component 8 [Source:HGNC Symbol;Acc:16147]                   |  |

|               |                                                                                            |   |
|---------------|--------------------------------------------------------------------------------------------|---|
| <b>MCM9</b>   | Minichromosome maintenance complex component 9 [Source:HGNC Symbol;Acc:21484]              |   |
| <b>MCMBP</b>  | Minichromosome maintenance complex binding protein [Source:HGNC Symbol;Acc:25782]          |   |
| <b>MCOLN1</b> | Mucolipin 1 [Source:HGNC Symbol;Acc:13356]                                                 |   |
| <b>MCPH1</b>  | Microcephalin 1 [Source:HGNC Symbol;Acc:6954]                                              |   |
| <b>MDFIC</b>  | Myod family inhibitor domain containing [Source:HGNC Symbol;Acc:28870]                     |   |
| <b>MDGA1</b>  | MAM domain containing glycosylphosphatidylinositol anchor 1 [Source:HGNC Symbol;Acc:19267] |   |
| <b>MDH2</b>   | Malate dehydrogenase 2, NAD (mitochondrial) [Source:HGNC Symbol;Acc:6971]                  |   |
| <b>MDM2</b>   | Mdm2 p53 binding protein homolog (mouse)                                                   | √ |
| <b>MDM4</b>   | Mdm4 p53 binding protein homolog (mouse)                                                   | √ |
| <b>MDN1</b>   | MDN1, midasin homolog (yeast) [Source:HGNC Symbol;Acc:18302]                               |   |
| <b>ME2</b>    | Malic enzyme 2, NAD(+)-dependent, mitochondrial [Source:HGNC Symbol;Acc:6984]              |   |
| <b>ME3</b>    | Malic enzyme 3, NADP(+)-dependent, mitochondrial [Source:HGNC Symbol;Acc:6985]             |   |
| <b>MECOM</b>  | MDS1 and EVI1 complex locus [Source:HGNC Symbol;Acc:3498]                                  |   |
| <b>MECP2</b>  | Methyl cpg binding protein 2 (Rett syndrome) [Source:HGNC Symbol;Acc:6990]                 |   |
| <b>MECR</b>   | Mitochondrial trans-2-enoyl-coa reductase [Source:HGNC Symbol;Acc:19691]                   |   |
| <b>MED1</b>   | Mediator complex subunit 1 [Source:HGNC Symbol;Acc:9234]                                   |   |
| <b>MED12</b>  | Mediator complex subunit 12                                                                | √ |
| <b>MED12L</b> | Mediator complex subunit 12-like [Source:HGNC Symbol;Acc:16050]                            |   |
| <b>MED13</b>  | Mediator complex subunit 13 [Source:HGNC Symbol;Acc:22474]                                 |   |
| <b>MED13L</b> | Mediator complex subunit 13-like [Source:HGNC Symbol;Acc:22962]                            |   |
| <b>MED14</b>  | Mediator complex subunit 14 [Source:HGNC Symbol;Acc:2370]                                  |   |
| <b>MED20</b>  | Mediator complex subunit 20 [Source:HGNC Symbol;Acc:16840]                                 |   |
| <b>MED23</b>  | Mediator complex subunit 23 [Source:HGNC Symbol;Acc:2372]                                  |   |
| <b>MED28</b>  | Mediator complex subunit 28 [Source:HGNC Symbol;Acc:24628]                                 |   |

|                |                                                                                                                    |  |
|----------------|--------------------------------------------------------------------------------------------------------------------|--|
| <b>MED29</b>   | Mediator complex subunit 29 [Source:HGNC Symbol;Acc:23074]                                                         |  |
| <b>MEF2C</b>   | Myocyte enhancer factor 2C [Source:HGNC Symbol;Acc:6996]                                                           |  |
| <b>MEF2D</b>   | Myocyte enhancer factor 2D [Source:HGNC Symbol;Acc:6997]                                                           |  |
| <b>MEGF10</b>  | Multiple EGF-like-domains 10 [Source:HGNC Symbol;Acc:29634]                                                        |  |
| <b>MEGF6</b>   | Multiple EGF-like-domains 6 [Source:HGNC Symbol;Acc:3232]                                                          |  |
| <b>MEGF8</b>   | Multiple EGF-like-domains 8 [Source:HGNC Symbol;Acc:3233]                                                          |  |
| <b>MEGF9</b>   | Multiple EGF-like-domains 9 [Source:HGNC Symbol;Acc:3234]                                                          |  |
| <b>MEI1</b>    | Meiosis inhibitor 1 [Source:HGNC Symbol;Acc:28613]                                                                 |  |
| <b>MEMO1</b>   | Mediator of cell motility 1 [Source:HGNC Symbol;Acc:14014]                                                         |  |
| <b>MERTK</b>   | C-mer proto-oncogene tyrosine kinase [Source:HGNC Symbol;Acc:7027]                                                 |  |
| <b>MESDC1</b>  | Mesoderm development candidate 1 [Source:HGNC Symbol;Acc:13519]                                                    |  |
| <b>MESDC2</b>  | Mesoderm development candidate 2 [Source:HGNC Symbol;Acc:13520]                                                    |  |
| <b>METAP1</b>  | Methionyl aminopeptidase 1 [Source:HGNC Symbol;Acc:15789]                                                          |  |
| <b>METRNL</b>  | Meteorin, glial cell differentiation regulator-like [Source:HGNC Symbol;Acc:27584]                                 |  |
| <b>METT10D</b> | Methyltransferase 10 domain containing [Source:HGNC Symbol;Acc:28484]                                              |  |
| <b>METT5D1</b> | Methyltransferase 5 domain containing 1 [Source:HGNC Symbol;Acc:26606]                                             |  |
| <b>METT12</b>  | Methyltransferase like 12 [Source:HGNC Symbol;Acc:33113]                                                           |  |
| <b>METT4</b>   | Methyltransferase like 4 [Source:HGNC Symbol;Acc:24726]                                                            |  |
| <b>METT7A</b>  | Methyltransferase like 7A [Source:HGNC Symbol;Acc:24550]                                                           |  |
| <b>METT7B</b>  | Methyltransferase like 7B [Source:HGNC Symbol;Acc:28276]                                                           |  |
| <b>METT8</b>   | Methyltransferase like 8 [Source:HGNC Symbol;Acc:25856]                                                            |  |
| <b>METT9</b>   | Methyltransferase like 9 [Source:HGNC Symbol;Acc:24586]                                                            |  |
| <b>MFAP3</b>   | Microfibrillar-associated protein 3 [Source:HGNC Symbol;Acc:7034]                                                  |  |
| <b>MFAP3L</b>  | Microfibrillar-associated protein 3-like [Source:HGNC Symbol;Acc:29083]                                            |  |
| <b>MFF</b>     | Mitochondrial fission factor [Source:HGNC Symbol;Acc:24858]                                                        |  |
| <b>MFGE8</b>   | Milk fat globule-EGF factor 8 protein [Source:HGNC Symbol;Acc:7036]                                                |  |
| <b>MFHAS1</b>  | Malignant fibrous histiocytoma amplified sequence 1 [Source:HGNC Symbol;Acc:16982]                                 |  |
| <b>MFI2</b>    | Antigen p97 (melanoma associated) identified by monoclonal antibodies 133.2 and 96.5 [Source:HGNC Symbol;Acc:7037] |  |
| <b>MFN1</b>    | Mitofusin 1 [Source:HGNC Symbol;Acc:18262]                                                                         |  |

|               |                                                                                                                                  |   |
|---------------|----------------------------------------------------------------------------------------------------------------------------------|---|
| <b>MFN2</b>   | Mitofusin 2 [Source:HGNC Symbol;Acc:16877]                                                                                       |   |
| <b>MFSD3</b>  | Major facilitator superfamily domain containing 3 [Source:HGNC Symbol;Acc:25157]                                                 |   |
| <b>MFSD6</b>  | Major facilitator superfamily domain containing 6 [Source:HGNC Symbol;Acc:24711]                                                 |   |
| <b>MFSD6L</b> | Major facilitator superfamily domain containing 6-like [Source:HGNC Symbol;Acc:26656]                                            |   |
| <b>MGA</b>    | MAX gene associated [Source:HGNC Symbol;Acc:14010]                                                                               |   |
| <b>MGAT1</b>  | Mannosyl (alpha-1,3-)-glycoprotein beta-1,2-N-acetylglucosaminyltransferase [Source:HGNC Symbol;Acc:7044]                        |   |
| <b>MGAT4A</b> | Mannosyl (alpha-1,3-)-glycoprotein beta-1,4-N-acetylglucosaminyltransferase, isozyme A [Source:HGNC Symbol;Acc:7047]             |   |
| <b>MGAT4C</b> | Mannosyl (alpha-1,3-)-glycoprotein beta-1,4-N-acetylglucosaminyltransferase, isozyme C (putative) [Source:HGNC Symbol;Acc:30871] |   |
| <b>MGAT5</b>  | Mannosyl (alpha-1,6-)-glycoprotein beta-1,6-N-acetyl-glucosaminyltransferase [Source:HGNC Symbol;Acc:7049]                       |   |
| <b>MGAT5B</b> | Mannosyl (alpha-1,6-)-glycoprotein beta-1,6-N-acetyl-glucosaminyltransferase, isozyme B [Source:HGNC Symbol;Acc:24140]           |   |
| <b>MGEA5</b>  | Meningioma expressed antigen 5 (hyaluronidase) [Source:HGNC Symbol;Acc:7056]                                                     |   |
| <b>MGLL</b>   | Monoglyceride lipase [Source:HGNC Symbol;Acc:17038]                                                                              |   |
| <b>MICB</b>   | MHC class I polypeptide-related sequence B [Source:HGNC Symbol;Acc:7091]                                                         |   |
| <b>MID1</b>   | Midline 1 (Opitz/BBB syndrome) [Source:HGNC Symbol;Acc:7095]                                                                     |   |
| <b>MID2</b>   | Midline 2 [Source:HGNC Symbol;Acc:7096]                                                                                          |   |
| <b>MIER3</b>  | Mesoderm induction early response 1, family member 3 [Source:HGNC Symbol;Acc:26678]                                              |   |
| <b>MIF4GD</b> | MIF4G domain containing [Source:HGNC Symbol;Acc:24030]                                                                           |   |
| <b>MIS18A</b> | MIS18 kinetochore protein homolog A (S. Pombe) [Source:HGNC Symbol;Acc:1286]                                                     |   |
| <b>MITF</b>   | Microphthalmia-associated transcription factor                                                                                   | √ |

|               |                                                                                                         |   |
|---------------|---------------------------------------------------------------------------------------------------------|---|
| <b>MKI67</b>  | Antigen identified by monoclonal antibody Ki-67 [Source:HGNC Symbol;Acc:7107]                           |   |
| <b>MKL1</b>   | Megakaryoblastic leukemia (translocation) 1                                                             | √ |
| <b>MKL2</b>   | MKL/myocardin-like 2 [Source:HGNC Symbol;Acc:29819]                                                     |   |
| <b>MKLN1</b>  | Muskelin 1, intracellular mediator containing kelch motifs [Source:HGNC Symbol;Acc:7109]                |   |
| <b>MKNK1</b>  | MAP kinase interacting serine/threonine kinase 1 [Source:HGNC Symbol;Acc:7110]                          |   |
| <b>MKRN3</b>  | Makorin ring finger protein 3 [Source:HGNC Symbol;Acc:7114]                                             |   |
| <b>MLC1</b>   | Megalencephalic leukoencephalopathy with subcortical cysts 1 [Source:HGNC Symbol;Acc:17082]             |   |
| <b>MLF1</b>   | Myeloid leukemia factor 1                                                                               | √ |
| <b>MLF1IP</b> | MLF1 interacting protein [Source:HGNC Symbol;Acc:21348]                                                 |   |
| <b>MLH1</b>   | Mutl homolog 1, colon cancer, nonpolyposis type 2 ( <i>E. Coli</i> )                                    | √ |
| <b>MLH3</b>   | Mutl homolog 3 ( <i>E. Coli</i> ) [Source:HGNC Symbol;Acc:7128]                                         |   |
| <b>MLL</b>    | Myeloid/lymphoid or mixed-lineage leukemia (trithorax homolog, <i>Drosophila</i> )                      | √ |
| <b>MLL2</b>   | Myeloid/lymphoid or mixed-lineage leukemia 2 [Source:HGNC Symbol;Acc:7133]                              |   |
| <b>MLL3</b>   | Myeloid/lymphoid or mixed-lineage leukemia 3                                                            | √ |
| <b>MLL5</b>   | Myeloid/lymphoid or mixed-lineage leukemia 5 (trithorax homolog, <i>Drosophila</i> )                    |   |
| <b>MLLT10</b> | Myeloid/lymphoid or mixed-lineage leukemia (trithorax homolog, <i>Drosophila</i> ); translocated to, 10 | √ |
| <b>MLLT3</b>  | Myeloid/lymphoid or mixed-lineage leukemia (trithorax homolog, <i>Drosophila</i> ); translocated to, 3  | √ |
| <b>MLLT4</b>  | Myeloid/lymphoid or mixed-lineage leukemia (trithorax homolog, <i>Drosophila</i> ); translocated to, 4  | √ |
| <b>MLLT6</b>  | Myeloid/lymphoid or mixed-lineage leukemia (trithorax homolog, <i>Drosophila</i> ); translocated to, 6  | √ |
| <b>MLPH</b>   | Melanophilin [Source:HGNC Symbol;Acc:29643]                                                             |   |
| <b>MLST8</b>  | MTOR associated protein, LST8 homolog ( <i>S. Cerevisiae</i> ) [Source:HGNC Symbol;Acc:24825]           |   |
| <b>MLX</b>    | MAX-like protein X [Source:HGNC Symbol;Acc:11645]                                                       |   |

|                |                                                                                         |   |
|----------------|-----------------------------------------------------------------------------------------|---|
| <b>MLXIPL</b>  | MLX interacting protein-like [Source:HGNC Symbol;Acc:12744]                             |   |
| <b>MLYCD</b>   | Malonyl-coa decarboxylase [Source:HGNC Symbol;Acc:7150]                                 |   |
| <b>MMAA</b>    | Methylmalonic aciduria (cobalamin deficiency) cbla type [Source:HGNC Symbol;Acc:18871]  |   |
| <b>MMD2</b>    | Monocyte to macrophage differentiation-associated 2 [Source:HGNC Symbol;Acc:30133]      |   |
| <b>MME</b>     | Membrane metallo-endopeptidase [Source:HGNC Symbol;Acc:7154]                            |   |
| <b>MMP11</b>   | Matrix metallopeptidase 11 (stromelysin 3) [Source:HGNC Symbol;Acc:7157]                |   |
| <b>MMP13</b>   | Matrix metallopeptidase 13 (collagenase 3) [Source:HGNC Symbol;Acc:7159]                |   |
| <b>MMP14</b>   | Matrix metallopeptidase 14 (membrane-inserted) [Source:HGNC Symbol;Acc:7160]            |   |
| <b>MMP16</b>   | Matrix metallopeptidase 16 (membrane-inserted) [Source:HGNC Symbol;Acc:7162]            |   |
| <b>MMP17</b>   | Matrix metallopeptidase 17 (membrane-inserted) [Source:HGNC Symbol;Acc:7163]            |   |
| <b>MMP24</b>   | Matrix metallopeptidase 24 (membrane-inserted) [Source:HGNC Symbol;Acc:7172]            |   |
| <b>MMP27</b>   | Matrix metallopeptidase 27 [Source:HGNC Symbol;Acc:14250]                               |   |
| <b>MMP28</b>   | Matrix metallopeptidase 28 [Source:HGNC Symbol;Acc:14366]                               |   |
| <b>MMRN2</b>   | Multimerin 2 [Source:HGNC Symbol;Acc:19888]                                             |   |
| <b>MMS19</b>   | MMS19 nucleotide excision repair homolog (S. Cerevisiae) [Source:HGNC Symbol;Acc:13824] |   |
| <b>MN1</b>     | Meningioma (disrupted in balanced translocation) 1                                      | √ |
| <b>MOBKL1B</b> | MOB1, Mps One Binder kinase activator-like 1B (yeast) [Source:HGNC Symbol;Acc:16015]    |   |
| <b>MOBKL2C</b> | MOB1, Mps One Binder kinase activator-like 2C (yeast) [Source:HGNC Symbol;Acc:29800]    |   |
| <b>MOCOS</b>   | Molybdenum cofactor sulfurase [Source:HGNC Symbol;Acc:18234]                            |   |
| <b>MOCS2</b>   | Molybdenum cofactor synthesis 2 [Source:HGNC Symbol;Acc:7193]                           |   |
| <b>MOCS3</b>   | Molybdenum cofactor synthesis 3 [Source:HGNC Symbol;Acc:15765]                          |   |
| <b>MOGAT1</b>  | Monoacylglycerol O-acyltransferase 1 [Source:HGNC Symbol;Acc:18210]                     |   |

|                 |                                                                                                |  |
|-----------------|------------------------------------------------------------------------------------------------|--|
| <b>MOGS</b>     | Mannosyl-oligosaccharide glucosidase [Source:HGNC Symbol;Acc:24862]                            |  |
| <b>MON1A</b>    | MON1 homolog A (yeast) [Source:HGNC Symbol;Acc:28207]                                          |  |
| <b>MON2</b>     | MON2 homolog (S. Cerevisiae) [Source:HGNC Symbol;Acc:29177]                                    |  |
| <b>MORC2</b>    | MORC family CW-type zinc finger 2 [Source:HGNC Symbol;Acc:23573]                               |  |
| <b>MORC3</b>    | MORC family CW-type zinc finger 3 [Source:HGNC Symbol;Acc:23572]                               |  |
| <b>MORC4</b>    | MORC family CW-type zinc finger 4 [Source:HGNC Symbol;Acc:23485]                               |  |
| <b>MORF4L1</b>  | Mortality factor 4 like 1 [Source:HGNC Symbol;Acc:16989]                                       |  |
| <b>MOSC2</b>    | MOCO sulphurase C-terminal domain containing 2 [Source:HGNC Symbol;Acc:26064]                  |  |
| <b>MOSPD1</b>   | Motile sperm domain containing 1 [Source:HGNC Symbol;Acc:25235]                                |  |
| <b>MOV10</b>    | Mov10, Moloney leukemia virus 10, homolog (mouse) [Source:HGNC Symbol;Acc:7200]                |  |
| <b>MOV10L1</b>  | Mov10l1, Moloney leukemia virus 10-like 1, homolog (mouse) [Source:HGNC Symbol;Acc:7201]       |  |
| <b>MOXD1</b>    | Monooxygenase, DBH-like 1 [Source:HGNC Symbol;Acc:21063]                                       |  |
| <b>MPDZ</b>     | Multiple PDZ domain protein [Source:HGNC Symbol;Acc:7208]                                      |  |
| <b>MPEG1</b>    | Macrophage expressed 1 [Source:HGNC Symbol;Acc:29619]                                          |  |
| <b>MPG</b>      | N-methylpurine-DNA glycosylase [Source:HGNC Symbol;Acc:7211]                                   |  |
| <b>MPHOSPH6</b> | M-phase phosphoprotein 6 [Source:HGNC Symbol;Acc:7214]                                         |  |
| <b>MPO</b>      | Myeloperoxidase [Source:HGNC Symbol;Acc:7218]                                                  |  |
| <b>MPP3</b>     | Membrane protein, palmitoylated 3 (MAGUK p55 subfamily member 3) [Source:HGNC Symbol;Acc:7221] |  |
| <b>MPPED2</b>   | Metallophosphoesterase domain containing 2 [Source:HGNC Symbol;Acc:1180]                       |  |
| <b>MPRIP</b>    | Myosin phosphatase Rho interacting protein [Source:HGNC Symbol;Acc:30321]                      |  |
| <b>MPST</b>     | Mercaptopyruvate sulfurtransferase [Source:HGNC Symbol;Acc:7223]                               |  |
| <b>MR1</b>      | Major histocompatibility complex, class I-related [Source:HGNC Symbol;Acc:4975]                |  |
| <b>MRAP2</b>    | Melanocortin 2 receptor accessory protein 2 [Source:HGNC Symbol;Acc:21232]                     |  |
| <b>MRC1</b>     | Mannose receptor, C type 1 [Source:HGNC Symbol;Acc:7228]                                       |  |
| <b>MRC1L1</b>   | Mannose receptor, C type 1-like 1 [Source:HGNC Symbol;Acc:23403]                               |  |

|                |                                                                                                 |   |
|----------------|-------------------------------------------------------------------------------------------------|---|
| <b>MRE11A</b>  | MRE11 meiotic recombination 11 homolog A ( <i>S. Cerevisiae</i> ) [Source:HGNC Symbol;Acc:7230] |   |
| <b>MREG</b>    | Melanoregulin [Source:HGNC Symbol;Acc:25478]                                                    |   |
| <b>MRGPRX3</b> | MAS-related GPR, member X3 [Source:HGNC Symbol;Acc:17980]                                       |   |
| <b>MRGPRX4</b> | MAS-related GPR, member X4 [Source:HGNC Symbol;Acc:17617]                                       |   |
| <b>MRO</b>     | Maestro [Source:HGNC Symbol;Acc:24121]                                                          |   |
| <b>MRPL13</b>  | Mitochondrial ribosomal protein L13 [Source:HGNC Symbol;Acc:14278]                              |   |
| <b>MRPL14</b>  | Mitochondrial ribosomal protein L14 [Source:HGNC Symbol;Acc:14279]                              |   |
| <b>MRPL28</b>  | Mitochondrial ribosomal protein L28 [Source:HGNC Symbol;Acc:14484]                              |   |
| <b>MRPL30</b>  | Mitochondrial ribosomal protein L30 [Source:HGNC Symbol;Acc:14036]                              |   |
| <b>MRPL32</b>  | Mitochondrial ribosomal protein L32 [Source:HGNC Symbol;Acc:14035]                              |   |
| <b>MRPL35</b>  | Mitochondrial ribosomal protein L35 [Source:HGNC Symbol;Acc:14489]                              |   |
| <b>MRPL38</b>  | Mitochondrial ribosomal protein L38 [Source:HGNC Symbol;Acc:14033]                              |   |
| <b>MRPL43</b>  | Mitochondrial ribosomal protein L43 [Source:HGNC Symbol;Acc:14517]                              |   |
| <b>MRPL50</b>  | Mitochondrial ribosomal protein L50 [Source:HGNC Symbol;Acc:16654]                              |   |
| <b>MRPL55</b>  | Mitochondrial ribosomal protein L55 [Source:HGNC Symbol;Acc:16686]                              |   |
| <b>MRPS23</b>  | Mitochondrial ribosomal protein S23 [Source:HGNC Symbol;Acc:14509]                              |   |
| <b>MRPS24</b>  | Mitochondrial ribosomal protein S24 [Source:HGNC Symbol;Acc:14510]                              |   |
| <b>MRPS27</b>  | Mitochondrial ribosomal protein S27 [Source:HGNC Symbol;Acc:14512]                              |   |
| <b>MRPS5</b>   | Mitochondrial ribosomal protein S5 [Source:HGNC Symbol;Acc:14498]                               |   |
| <b>MRVII</b>   | Murine retrovirus integration site 1 homolog [Source:HGNC Symbol;Acc:7237]                      |   |
| <b>MS4A14</b>  | Membrane-spanning 4-domains, subfamily A, member 14 [Source:HGNC Symbol;Acc:30706]              |   |
| <b>MS4A5</b>   | Membrane-spanning 4-domains, subfamily A, member 5 [Source:HGNC Symbol;Acc:13374]               |   |
| <b>MS4A6A</b>  | Membrane-spanning 4-domains, subfamily A, member 6A [Source:HGNC Symbol;Acc:13375]              |   |
| <b>MSH6</b>    | Muts homolog 6 ( <i>E. Coli</i> )                                                               | √ |
| <b>MSI2</b>    | Musashi homolog 2 ( <i>Drosophila</i> )                                                         | √ |
| <b>MSL1</b>    | Male-specific lethal 1 homolog ( <i>Drosophila</i> ) [Source:HGNC Symbol;Acc:27905]             |   |



|                |                                                                                                                                                                       |   |
|----------------|-----------------------------------------------------------------------------------------------------------------------------------------------------------------------|---|
| <b>MSL2</b>    | Male-specific lethal 2 homolog (Drosophila) [Source:HGNC Symbol;Acc:25544]                                                                                            |   |
| <b>MSL3</b>    | Male-specific lethal 3 homolog (Drosophila) [Source:HGNC Symbol;Acc:7370]                                                                                             |   |
| <b>MSLNL</b>   | Mesothelin-like [Source:HGNC Symbol;Acc:14170]                                                                                                                        |   |
| <b>MSMB</b>    | Microseminoprotein, beta- [Source:HGNC Symbol;Acc:7372]                                                                                                               |   |
| <b>MSN</b>     | Moesin                                                                                                                                                                | √ |
| <b>MST1R</b>   | Macrophage stimulating 1 receptor (c-met-related tyrosine kinase) [Source:HGNC Symbol;Acc:7381]                                                                       |   |
| <b>MT1E</b>    | Metallothionein 1E [Source:HGNC Symbol;Acc:7397]                                                                                                                      |   |
| <b>MTAP</b>    | Methylthioadenosine phosphorylase [Source:HGNC Symbol;Acc:7413]                                                                                                       |   |
| <b>MTBP</b>    | Mdm2, transformed 3T3 cell double minute 2, p53 binding protein (mouse) binding protein, 104kda [Source:HGNC Symbol;Acc:7417]                                         |   |
| <b>MTDH</b>    | Metadherin [Source:HGNC Symbol;Acc:29608]                                                                                                                             |   |
| <b>MTERFD2</b> | MTERF domain containing 2 [Source:HGNC Symbol;Acc:28785]                                                                                                              |   |
| <b>MTERFD3</b> | MTERF domain containing 3 [Source:HGNC Symbol;Acc:30779]                                                                                                              |   |
| <b>MTF1</b>    | Metal-regulatory transcription factor 1 [Source:HGNC Symbol;Acc:7428]                                                                                                 |   |
| <b>MTF2</b>    | Metal response element binding transcription factor 2 [Source:HGNC Symbol;Acc:29535]                                                                                  |   |
| <b>MTFR1</b>   | Mitochondrial fission regulator 1 [Source:HGNC Symbol;Acc:29510]                                                                                                      |   |
| <b>MTHFD1</b>  | Methylenetetrahydrofolate dehydrogenase (NADP+ dependent) 1, methenyltetrahydrofolate cyclohydrolase, formyltetrahydrofolate synthetase [Source:HGNC Symbol;Acc:7432] |   |
| <b>MTHFSD</b>  | Methenyltetrahydrofolate synthetase domain containing [Source:HGNC Symbol;Acc:25778]                                                                                  |   |
| <b>MTL5</b>    | Metallothionein-like 5, testis-specific (tesmin) [Source:HGNC Symbol;Acc:7446]                                                                                        |   |
| <b>MTMR10</b>  | Myotubularin related protein 10 [Source:HGNC Symbol;Acc:25999]                                                                                                        |   |
| <b>MTMR12</b>  | Myotubularin related protein 12 [Source:HGNC Symbol;Acc:18191]                                                                                                        |   |
| <b>MTMR2</b>   | Myotubularin related protein 2 [Source:HGNC Symbol;Acc:7450]                                                                                                          |   |
| <b>MTMR3</b>   | Myotubularin related protein 3 [Source:HGNC Symbol;Acc:7451]                                                                                                          |   |
| <b>MTMR4</b>   | Myotubularin related protein 4 [Source:HGNC Symbol;Acc:7452]                                                                                                          |   |
| <b>MTMR8</b>   | Myotubularin related protein 8 [Source:HGNC Symbol;Acc:16825]                                                                                                         |   |

|               |                                                                                                 |  |
|---------------|-------------------------------------------------------------------------------------------------|--|
| <b>MTMR9</b>  | Myotubularin related protein 9 [Source:HGNC Symbol;Acc:14596]                                   |  |
| <b>MTNR1A</b> | Melatonin receptor 1A [Source:HGNC Symbol;Acc:7463]                                             |  |
| <b>MTO1</b>   | Mitochondrial translation optimization 1 homolog (S. Cerevisiae) [Source:HGNC Symbol;Acc:19261] |  |
| <b>MTOR</b>   | Mechanistic target of rapamycin (serine/threonine kinase) [Source:HGNC Symbol;Acc:3942]         |  |
| <b>MTPAP</b>  | Mitochondrial poly(A) polymerase [Source:HGNC Symbol;Acc:25532]                                 |  |
| <b>MTPN</b>   | Myotrophin [Source:HGNC Symbol;Acc:15667]                                                       |  |
| <b>MTR</b>    | 5-methyltetrahydrofolate-homocysteine methyltransferase [Source:HGNC Symbol;Acc:7468]           |  |
| <b>MTUS1</b>  | Microtubule associated tumor suppressor 1 [Source:HGNC Symbol;Acc:29789]                        |  |
| <b>MTUS2</b>  | Microtubule associated tumor suppressor candidate 2 [Source:HGNC Symbol;Acc:20595]              |  |
| <b>MUC12</b>  | Mucin 12, cell surface associated [Source:HGNC Symbol;Acc:7510]                                 |  |
| <b>MUC2</b>   | Mucin 2, oligomeric mucus/gel-forming [Source:HGNC Symbol;Acc:7512]                             |  |
| <b>MUC4</b>   | Mucin 4, cell surface associated [Source:HGNC Symbol;Acc:7514]                                  |  |
| <b>MUC5AC</b> | Mucin 5AC, oligomeric mucus/gel-forming [Source:HGNC Symbol;Acc:7515]                           |  |
| <b>MUC5B</b>  | Mucin 5B, oligomeric mucus/gel-forming [Source:HGNC Symbol;Acc:7516]                            |  |
| <b>MUC6</b>   | Mucin 6, oligomeric mucus/gel-forming [Source:HGNC Symbol;Acc:7517]                             |  |
| <b>MUL1</b>   | Mitochondrial E3 ubiquitin protein ligase 1 [Source:HGNC Symbol;Acc:25762]                      |  |
| <b>MUM1</b>   | Melanoma associated antigen (mutated) 1 [Source:HGNC Symbol;Acc:29641]                          |  |
| <b>MURC</b>   | Muscle-related coiled-coil protein [Source:HGNC Symbol;Acc:33742]                               |  |
| <b>MUT</b>    | Methylmalonyl coa mutase [Source:HGNC Symbol;Acc:7526]                                          |  |
| <b>MUTED</b>  | Muted homolog (mouse) [Source:HGNC Symbol;Acc:18561]                                            |  |
| <b>MX2</b>    | Myxovirus (influenza virus) resistance 2 (mouse) [Source:HGNC Symbol;Acc:7533]                  |  |
| <b>MXI1</b>   | MAX interactor 1 [Source:HGNC Symbol;Acc:7534]                                                  |  |
| <b>MXRA5</b>  | Matrix-remodelling associated 5 [Source:HGNC Symbol;Acc:7539]                                   |  |
| <b>MYBPC2</b> | Myosin binding protein C, fast type [Source:HGNC Symbol;Acc:7550]                               |  |

|               |                                                                                                               |   |
|---------------|---------------------------------------------------------------------------------------------------------------|---|
| <b>MYBPC3</b> | Myosin binding protein C, cardiac [Source:HGNC Symbol;Acc:7551]                                               |   |
| <b>MYBPHL</b> | Myosin binding protein H-like [Source:HGNC Symbol;Acc:30434]                                                  |   |
| <b>MYCBP2</b> | MYC binding protein 2 [Source:HGNC Symbol;Acc:23386]                                                          |   |
| <b>MYCL1</b>  | V-myc myelocytomatosis viral oncogene homolog 1, lung carcinoma derived (avian) [Source:HGNC Symbol;Acc:7555] |   |
| <b>MYD88</b>  | Myeloid differentiation primary response gene (88)                                                            | √ |
| <b>MYF6</b>   | Myogenic factor 6 (herculin) [Source:HGNC Symbol;Acc:7566]                                                    |   |
| <b>MYH1</b>   | Myosin, heavy chain 1, skeletal muscle, adult [Source:HGNC Symbol;Acc:7567]                                   |   |
| <b>MYH10</b>  | Myosin, heavy chain 10, non-muscle [Source:HGNC Symbol;Acc:7568]                                              |   |
| <b>MYH11</b>  | Myosin, heavy chain 11, smooth muscle                                                                         | √ |
| <b>MYH15</b>  | Myosin, heavy chain 15 [Source:HGNC Symbol;Acc:31073]                                                         |   |
| <b>MYH2</b>   | Myosin, heavy chain 2, skeletal muscle, adult [Source:HGNC Symbol;Acc:7572]                                   |   |
| <b>MYH3</b>   | Myosin, heavy chain 3, skeletal muscle, embryonic [Source:HGNC Symbol;Acc:7573]                               |   |
| <b>MYH4</b>   | Myosin, heavy chain 4, skeletal muscle [Source:HGNC Symbol;Acc:7574]                                          |   |
| <b>MYH7</b>   | Myosin, heavy chain 7, cardiac muscle, beta [Source:HGNC Symbol;Acc:7577]                                     |   |
| <b>MYH8</b>   | Myosin, heavy chain 8, skeletal muscle, perinatal [Source:HGNC Symbol;Acc:7578]                               |   |
| <b>MYL3</b>   | Myosin, light chain 3, alkali; ventricular, skeletal, slow [Source:HGNC Symbol;Acc:7584]                      |   |
| <b>MYL6</b>   | Myosin, light chain 6, alkali, smooth muscle and non-muscle [Source:HGNC Symbol;Acc:7587]                     |   |
| <b>MYLIP</b>  | Myosin regulatory light chain interacting protein [Source:HGNC Symbol;Acc:21155]                              |   |
| <b>MYLK</b>   | Myosin light chain kinase [Source:HGNC Symbol;Acc:7590]                                                       |   |
| <b>MYLK3</b>  | Myosin light chain kinase 3 [Source:HGNC Symbol;Acc:29826]                                                    |   |
| <b>MYLK4</b>  | Myosin light chain kinase family, member 4 [Source:HGNC Symbol;Acc:27972]                                     |   |
| <b>MYNN</b>   | Myoneurin [Source:HGNC Symbol;Acc:14955]                                                                      |   |
| <b>MYO15A</b> | Myosin XVA [Source:HGNC Symbol;Acc:7594]                                                                      |   |

|               |                                                                                               |   |
|---------------|-----------------------------------------------------------------------------------------------|---|
| <b>MYO15B</b> | Myosin XVB pseudogene [Source:HGNC Symbol;Acc:14083]                                          |   |
| <b>MYO16</b>  | Myosin XVI [Source:HGNC Symbol;Acc:29822]                                                     |   |
| <b>MYO18A</b> | Myosin XVIII A [Source:HGNC Symbol;Acc:31104]                                                 |   |
| <b>MYO19</b>  | Myosin XIX [Source:HGNC Symbol;Acc:26234]                                                     |   |
| <b>MYO1A</b>  | Myosin IA [Source:HGNC Symbol;Acc:7595]                                                       |   |
| <b>MYO3A</b>  | Myosin IIIA [Source:HGNC Symbol;Acc:7601]                                                     |   |
| <b>MYO5A</b>  | Myosin VA (heavy chain 12, myoxin) [Source:HGNC Symbol;Acc:7602]                              |   |
| <b>MYO5B</b>  | Myosin VB [Source:HGNC Symbol;Acc:7603]                                                       |   |
| <b>MYO5C</b>  | Myosin VC [Source:HGNC Symbol;Acc:7604]                                                       |   |
| <b>MYO9A</b>  | Myosin IXA [Source:HGNC Symbol;Acc:7608]                                                      |   |
| <b>MYOC</b>   | Myocilin, trabecular meshwork inducible glucocorticoid response [Source:HGNC Symbol;Acc:7610] |   |
| <b>MYOCD</b>  | Myocardin [Source:HGNC Symbol;Acc:16067]                                                      |   |
| <b>MYOF</b>   | Myoferlin [Source:HGNC Symbol;Acc:3656]                                                       |   |
| <b>MYOM1</b>  | Myomesin 1, 185kda [Source:HGNC Symbol;Acc:7613]                                              |   |
| <b>MYOT</b>   | Myotilin [Source:HGNC Symbol;Acc:12399]                                                       |   |
| <b>MYOZ3</b>  | Myozenin 3 [Source:HGNC Symbol;Acc:18565]                                                     |   |
| <b>MYPN</b>   | Myopalladin [Source:HGNC Symbol;Acc:23246]                                                    |   |
| <b>MYRIP</b>  | Myosin VIIA and Rab interacting protein [Source:HGNC Symbol;Acc:19156]                        |   |
| <b>MYST3</b>  | MYST histone acetyltransferase (monocytic leukemia) 3 [Source:HGNC Symbol;Acc:13013]          |   |
| <b>MYST4</b>  | MYST histone acetyltransferase (monocytic leukemia) 4                                         | √ |
| <b>MYT1</b>   | Myelin transcription factor 1 [Source:HGNC Symbol;Acc:7622]                                   |   |
| <b>MYT1L</b>  | Myelin transcription factor 1-like [Source:HGNC Symbol;Acc:7623]                              |   |
| <b>MZT1</b>   | Mitotic spindle organizing protein 1 [Source:HGNC Symbol;Acc:33830]                           |   |
| <b>N4BP2</b>  | NEDD4 binding protein 2 [Source:HGNC Symbol;Acc:29851]                                        |   |
| <b>NAA16</b>  | N(alpha)-acetyltransferase 16, nata auxiliary subunit [Source:HGNC Symbol;Acc:26164]          |   |
| <b>NAA25</b>  | N(alpha)-acetyltransferase 25, natb auxiliary subunit [Source:HGNC Symbol;Acc:25783]          |   |
| <b>NAA30</b>  | N(alpha)-acetyltransferase 30, natc catalytic subunit [Source:HGNC Symbol;Acc:19844]          |   |

|                 |                                                                                                                        |   |
|-----------------|------------------------------------------------------------------------------------------------------------------------|---|
| <b>NAA40</b>    | N(alpha)-acetyltransferase 40, natd catalytic subunit, homolog ( <i>S. Cerevisiae</i> ) [Source:HGNC Symbol;Acc:25845] |   |
| <b>NAA50</b>    | N(alpha)-acetyltransferase 50, nate catalytic subunit [Source:HGNC Symbol;Acc:29533]                                   |   |
| <b>NAAA</b>     | N-acylethanolamine acid amidase [Source:HGNC Symbol;Acc:736]                                                           |   |
| <b>NAALAD2</b>  | N-acetylated alpha-linked acidic dipeptidase 2 [Source:HGNC Symbol;Acc:14526]                                          |   |
| <b>NAALADL1</b> | N-acetylated alpha-linked acidic dipeptidase-like 1 [Source:HGNC Symbol;Acc:23536]                                     |   |
| <b>NACA</b>     | Nascent polypeptide-associated complex alpha subunit                                                                   | √ |
| <b>NACC1</b>    | Nucleus accumbens associated 1, BEN and BTB (POZ) domain containing [Source:HGNC Symbol;Acc:20967]                     |   |
| <b>NADK</b>     | NAD kinase [Source:HGNC Symbol;Acc:29831]                                                                              |   |
| <b>NADSYN1</b>  | NAD synthetase 1 [Source:HGNC Symbol;Acc:29832]                                                                        |   |
| <b>NAGK</b>     | N-acetylglucosamine kinase [Source:HGNC Symbol;Acc:17174]                                                              |   |
| <b>NAGLU</b>    | N-acetylglucosaminidase, alpha [Source:HGNC Symbol;Acc:7632]                                                           |   |
| <b>NAGPA</b>    | N-acetylglucosamine-1-phosphodiester alpha-N-acetylglucosaminidase [Source:HGNC Symbol;Acc:17378]                      |   |
| <b>NAIF1</b>    | Nuclear apoptosis inducing factor 1 [Source:HGNC Symbol;Acc:25446]                                                     |   |
| <b>NAIP</b>     | NLR family, apoptosis inhibitory protein [Source:HGNC Symbol;Acc:7634]                                                 |   |
| <b>NALCN</b>    | Sodium leak channel, non-selective [Source:HGNC Symbol;Acc:19082]                                                      |   |
| <b>NAMPT</b>    | Nicotinamide phosphoribosyltransferase [Source:HGNC Symbol;Acc:30092]                                                  |   |
| <b>NANP</b>     | N-acetylneuraminic acid phosphatase [Source:HGNC Symbol;Acc:16140]                                                     |   |
| <b>NANS</b>     | N-acetylneuraminic acid synthase [Source:HGNC Symbol;Acc:19237]                                                        |   |
| <b>NAP1L4</b>   | Nucleosome assembly protein 1-like 4 [Source:HGNC Symbol;Acc:7640]                                                     |   |
| <b>NAP1L5</b>   | Nucleosome assembly protein 1-like 5 [Source:HGNC Symbol;Acc:19968]                                                    |   |
| <b>NAPRT1</b>   | Nicotinate phosphoribosyltransferase domain containing 1 [Source:HGNC Symbol;Acc:30450]                                |   |
| <b>NARF</b>     | Nuclear prelamin A recognition factor [Source:HGNC Symbol;Acc:29916]                                                   |   |
| <b>NARFL</b>    | Nuclear prelamin A recognition factor-like [Source:HGNC Symbol;Acc:14179]                                              |   |
| <b>NARG2</b>    | NMDA receptor regulated 2 [Source:HGNC Symbol;Acc:29885]                                                               |   |

|               |                                                                                        |  |
|---------------|----------------------------------------------------------------------------------------|--|
| <b>NARS</b>   | Asparaginyl-trna synthetase [Source:HGNC Symbol;Acc:7643]                              |  |
| <b>NARS2</b>  | Asparaginyl-trna synthetase 2, mitochondrial (putative) [Source:HGNC Symbol;Acc:26274] |  |
| <b>NASP</b>   | Nuclear autoantigenic sperm protein (histone-binding) [Source:HGNC Symbol;Acc:7644]    |  |
| <b>NAT1</b>   | N-acetyltransferase 1 (arylamine N-acetyltransferase) [Source:HGNC Symbol;Acc:7645]    |  |
| <b>NAT10</b>  | N-acetyltransferase 10 (GCN5-related) [Source:HGNC Symbol;Acc:29830]                   |  |
| <b>NAT8L</b>  | N-acetyltransferase 8-like (GCN5-related, putative) [Source:HGNC Symbol;Acc:26742]     |  |
| <b>NAV2</b>   | Neuron navigator 2 [Source:HGNC Symbol;Acc:15997]                                      |  |
| <b>NBAS</b>   | Neuroblastoma amplified sequence [Source:HGNC Symbol;Acc:15625]                        |  |
| <b>NBEA</b>   | Neurobeachin [Source:HGNC Symbol;Acc:7648]                                             |  |
| <b>NBEAL1</b> | Neurobeachin-like 1 [Source:HGNC Symbol;Acc:20681]                                     |  |
| <b>NBEAL2</b> | Neurobeachin-like 2 [Source:HGNC Symbol;Acc:31928]                                     |  |
| <b>NBL1</b>   | Neuroblastoma, suppression of tumorigenicity 1 [Source:HGNC Symbol;Acc:7650]           |  |
| <b>NBPF10</b> | Neuroblastoma breakpoint family, member 10 [Source:HGNC Symbol;Acc:31992]              |  |
| <b>NBPF11</b> | Neuroblastoma breakpoint family, member 11 [Source:HGNC Symbol;Acc:31993]              |  |
| <b>NBPF12</b> | Neuroblastoma breakpoint family, member 12 [Source:HGNC Symbol;Acc:31994]              |  |
| <b>NBPF14</b> | Neuroblastoma breakpoint family, member 14 [Source:HGNC Symbol;Acc:25232]              |  |
| <b>NBPF15</b> | Neuroblastoma breakpoint family, member 15 [Source:HGNC Symbol;Acc:28791]              |  |
| <b>NBPF16</b> | Neuroblastoma breakpoint family, member 16 [Source:HGNC Symbol;Acc:31996]              |  |
| <b>NBPF20</b> | Neuroblastoma breakpoint family, member 20 [Source:HGNC Symbol;Acc:32000]              |  |

|                |                                                                                                   |   |
|----------------|---------------------------------------------------------------------------------------------------|---|
| <b>NBPF24</b>  | Neuroblastoma breakpoint family, member 24 [Source:HGNC Symbol;Acc:27299]                         |   |
| <b>NBPF3</b>   | Neuroblastoma breakpoint family, member 3 [Source:HGNC Symbol;Acc:25076]                          |   |
| <b>NBPF4</b>   | Neuroblastoma breakpoint family, member 4 [Source:HGNC Symbol;Acc:26550]                          |   |
| <b>NBPF6</b>   | Neuroblastoma breakpoint family, member 6 [Source:HGNC Symbol;Acc:31988]                          |   |
| <b>NBPF9</b>   | Neuroblastoma breakpoint family, member 9 [Source:HGNC Symbol;Acc:31991]                          |   |
| <b>NBR1</b>    | Neighbor of BRCA1 gene 1 [Source:HGNC Symbol;Acc:6746]                                            |   |
| <b>NCALD</b>   | Neurocalcin delta [Source:HGNC Symbol;Acc:7655]                                                   |   |
| <b>NCAM2</b>   | Neural cell adhesion molecule 2 [Source:HGNC Symbol;Acc:7657]                                     |   |
| <b>NCAN</b>    | Neurocan [Source:HGNC Symbol;Acc:2465]                                                            |   |
| <b>NCAPG</b>   | Non-SMC condensin I complex, subunit G [Source:HGNC Symbol;Acc:24304]                             |   |
| <b>NCAPG2</b>  | Non-SMC condensin II complex, subunit G2 [Source:HGNC Symbol;Acc:21904]                           |   |
| <b>NCAPH</b>   | Non-SMC condensin I complex, subunit H [Source:HGNC Symbol;Acc:1112]                              |   |
| <b>NCBP2</b>   | Nuclear cap binding protein subunit 2, 20kda [Source:HGNC Symbol;Acc:7659]                        |   |
| <b>NCCR1</b>   | Non-specific cytotoxic cell receptor protein 1 homolog (zebrafish) [Source:HGNC Symbol;Acc:33739] |   |
| <b>NCF2</b>    | Neutrophil cytosolic factor 2 [Source:HGNC Symbol;Acc:7661]                                       |   |
| <b>NCK1</b>    | NCK adaptor protein 1 [Source:HGNC Symbol;Acc:7664]                                               |   |
| <b>NCKAP1L</b> | NCK-associated protein 1-like [Source:HGNC Symbol;Acc:4862]                                       |   |
| <b>NCKAP5</b>  | NCK-associated protein 5 [Source:HGNC Symbol;Acc:29847]                                           |   |
| <b>NCKIPSD</b> | NCK interacting protein with SH3 domain [Source:HGNC Symbol;Acc:15486]                            |   |
| <b>NCLN</b>    | Nicalin [Source:HGNC Symbol;Acc:26923]                                                            |   |
| <b>NCOA1</b>   | Nuclear receptor coactivator 1                                                                    | √ |
| <b>NCOA3</b>   | Nuclear receptor coactivator 3 [Source:HGNC Symbol;Acc:7670]                                      |   |

|                |                                                                                                      |   |
|----------------|------------------------------------------------------------------------------------------------------|---|
| <b>NCOA5</b>   | Nuclear receptor coactivator 5 [Source:HGNC Symbol;Acc:15909]                                        |   |
| <b>NCOA6</b>   | Nuclear receptor coactivator 6 [Source:HGNC Symbol;Acc:15936]                                        |   |
| <b>NCOR1</b>   | Nuclear receptor corepressor 1 [Source:HGNC Symbol;Acc:7672]                                         |   |
| <b>NCOR2</b>   | Nuclear receptor corepressor 2 [Source:HGNC Symbol;Acc:7673]                                         |   |
| <b>NCS1</b>    | Neuronal calcium sensor 1 [Source:HGNC Symbol;Acc:3953]                                              |   |
| <b>NCSTN</b>   | Nicastrin [Source:HGNC Symbol;Acc:17091]                                                             |   |
| <b>NDC80</b>   | NDC80 homolog, kinetochore complex component (S. Cerevisiae) [Source:HGNC Symbol;Acc:16909]          |   |
| <b>NDEL1</b>   | Nude nuclear distribution gene E homolog (A. Nidulans)-like 1 [Source:HGNC Symbol;Acc:17620]         |   |
| <b>NDFIP1</b>  | Nedd4 family interacting protein 1 [Source:HGNC Symbol;Acc:17592]                                    |   |
| <b>NDFIP2</b>  | Nedd4 family interacting protein 2 [Source:HGNC Symbol;Acc:18537]                                    |   |
| <b>NDRG1</b>   | N-myc downstream regulated 1                                                                         | √ |
| <b>NDRG4</b>   | NDRG family member 4 [Source:HGNC Symbol;Acc:14466]                                                  |   |
| <b>NDST2</b>   | N-deacetylase/N-sulfotransferase (heparan glucosaminyl) 2 [Source:HGNC Symbol;Acc:7681]              |   |
| <b>NDST3</b>   | N-deacetylase/N-sulfotransferase (heparan glucosaminyl) 3 [Source:HGNC Symbol;Acc:7682]              |   |
| <b>NDUFA10</b> | NADH dehydrogenase (ubiquinone) 1 alpha subcomplex, 10, 42kda [Source:HGNC Symbol;Acc:7684]          |   |
| <b>NDUFA3</b>  | NADH dehydrogenase (ubiquinone) 1 alpha subcomplex, 3, 9kda [Source:HGNC Symbol;Acc:7686]            |   |
| <b>NDUFAF3</b> | NADH dehydrogenase (ubiquinone) 1 alpha subcomplex, assembly factor 3 [Source:HGNC Symbol;Acc:29918] |   |
| <b>NDUFB10</b> | NADH dehydrogenase (ubiquinone) 1 beta subcomplex, 10, 22kda [Source:HGNC Symbol;Acc:7696]           |   |
| <b>NDUFB5</b>  | NADH dehydrogenase (ubiquinone) 1 beta subcomplex, 5, 16kda [Source:HGNC Symbol;Acc:7700]            |   |
| <b>NDUFB9</b>  | NADH dehydrogenase (ubiquinone) 1 beta subcomplex, 9, 22kda [Source:HGNC Symbol;Acc:7704]            |   |
| <b>NDUFC2</b>  | NADH dehydrogenase (ubiquinone) 1, subcomplex unknown, 2, 14.5kda [Source:HGNC Symbol;Acc:7706]      |   |



|               |                                                                                                                 |  |
|---------------|-----------------------------------------------------------------------------------------------------------------|--|
| <b>NDUFS2</b> | NADH dehydrogenase (ubiquinone) Fe-S protein 2, 49kda (NADH-coenzyme Q reductase) [Source:HGNC Symbol;Acc:7708] |  |
| <b>NDUFS5</b> | NADH dehydrogenase (ubiquinone) Fe-S protein 5, 15kda (NADH-coenzyme Q reductase) [Source:HGNC Symbol;Acc:7712] |  |
| <b>NDUFV1</b> | NADH dehydrogenase (ubiquinone) flavoprotein 1, 51kda [Source:HGNC Symbol;Acc:7716]                             |  |
| <b>NDUFV2</b> | NADH dehydrogenase (ubiquinone) flavoprotein 2, 24kda [Source:HGNC Symbol;Acc:7717]                             |  |
| <b>NEB</b>    | Nebulin [Source:HGNC Symbol;Acc:7720]                                                                           |  |
| <b>NEBL</b>   | Nebulette [Source:HGNC Symbol;Acc:16932]                                                                        |  |
| <b>NECAP1</b> | NECAP endocytosis associated 1 [Source:HGNC Symbol;Acc:24539]                                                   |  |
| <b>NECAP2</b> | NECAP endocytosis associated 2 [Source:HGNC Symbol;Acc:25528]                                                   |  |
| <b>NEDD1</b>  | Neural precursor cell expressed, developmentally down-regulated 1 [Source:HGNC Symbol;Acc:7723]                 |  |
| <b>NEDD4</b>  | Neural precursor cell expressed, developmentally down-regulated 4 [Source:HGNC Symbol;Acc:7727]                 |  |
| <b>NEDD4L</b> | Neural precursor cell expressed, developmentally down-regulated 4-like [Source:HGNC Symbol;Acc:7728]            |  |
| <b>NEDD8</b>  | Neural precursor cell expressed, developmentally down-regulated 8 [Source:HGNC Symbol;Acc:7732]                 |  |
| <b>NEFH</b>   | Neurofilament, heavy polypeptide [Source:HGNC Symbol;Acc:7737]                                                  |  |
| <b>NEK11</b>  | NIMA (never in mitosis gene a)- related kinase 11 [Source:HGNC Symbol;Acc:18593]                                |  |
| <b>NEK6</b>   | NIMA (never in mitosis gene a)-related kinase 6 [Source:HGNC Symbol;Acc:7749]                                   |  |
| <b>NEK8</b>   | NIMA (never in mitosis gene a)- related kinase 8 [Source:HGNC Symbol;Acc:13387]                                 |  |
| <b>NEK9</b>   | NIMA (never in mitosis gene a)- related kinase 9 [Source:HGNC Symbol;Acc:18591]                                 |  |
| <b>NELL1</b>  | NEL-like 1 (chicken) [Source:HGNC Symbol;Acc:7750]                                                              |  |
| <b>NELL2</b>  | NEL-like 2 (chicken) [Source:HGNC Symbol;Acc:7751]                                                              |  |
| <b>NEO1</b>   | Neogenin 1 [Source:HGNC Symbol;Acc:7754]                                                                        |  |
| <b>NET1</b>   | Neuroepithelial cell transforming 1 [Source:HGNC Symbol;Acc:14592]                                              |  |

|                |                                                                                                                   |   |
|----------------|-------------------------------------------------------------------------------------------------------------------|---|
| <b>NETO1</b>   | Neuropilin (NRP) and tolloid (TLL)-like 1 [Source:HGNC Symbol;Acc:13823]                                          |   |
| <b>NEU1</b>    | Sialidase 1 (lysosomal sialidase) [Source:HGNC Symbol;Acc:7758]                                                   |   |
| <b>NEU3</b>    | Sialidase 3 (membrane sialidase) [Source:HGNC Symbol;Acc:7760]                                                    |   |
| <b>NEUROD4</b> | Neurogenic differentiation 4 [Source:HGNC Symbol;Acc:13802]                                                       |   |
| <b>NEXN</b>    | Nexilin (F actin binding protein) [Source:HGNC Symbol;Acc:29557]                                                  |   |
| <b>NF1</b>     | Neurofibromin 1                                                                                                   | √ |
| <b>NF2</b>     | Neurofibromin 2 (merlin)                                                                                          | √ |
| <b>NFAT5</b>   | Nuclear factor of activated T-cells 5, tonicity-responsive [Source:HGNC Symbol;Acc:7774]                          |   |
| <b>NFATC1</b>  | Nuclear factor of activated T-cells, cytoplasmic, calcineurin-dependent 1 [Source:HGNC Symbol;Acc:7775]           |   |
| <b>NFATC2</b>  | Nuclear factor of activated T-cells, cytoplasmic, calcineurin-dependent 2 [Source:HGNC Symbol;Acc:7776]           |   |
| <b>NFATC4</b>  | Nuclear factor of activated T-cells, cytoplasmic, calcineurin-dependent 4 [Source:HGNC Symbol;Acc:7778]           |   |
| <b>NFIA</b>    | Nuclear factor I/A [Source:HGNC Symbol;Acc:7784]                                                                  |   |
| <b>NFKBIA</b>  | Nuclear factor of kappa light polypeptide gene enhancer in B-cells inhibitor, alpha [Source:HGNC Symbol;Acc:7797] |   |
| <b>NFRKB</b>   | Nuclear factor related to kappa binding protein [Source:HGNC Symbol;Acc:7802]                                     |   |
| <b>NFX1</b>    | Nuclear transcription factor, X-box binding 1 [Source:HGNC Symbol;Acc:7803]                                       |   |
| <b>NFYA</b>    | Nuclear transcription factor Y, alpha [Source:HGNC Symbol;Acc:7804]                                               |   |
| <b>NGB</b>     | Neuroglobin [Source:HGNC Symbol;Acc:14077]                                                                        |   |
| <b>NGEF</b>    | Neuronal guanine nucleotide exchange factor [Source:HGNC Symbol;Acc:7807]                                         |   |
| <b>NGLY1</b>   | N-glycanase 1 [Source:HGNC Symbol;Acc:17646]                                                                      |   |
| <b>NHLH1</b>   | Nescient helix loop helix 1 [Source:HGNC Symbol;Acc:7817]                                                         |   |
| <b>NHLH2</b>   | Nescient helix loop helix 2 [Source:HGNC Symbol;Acc:7818]                                                         |   |
| <b>NHLRC2</b>  | NHL repeat containing 2 [Source:HGNC Symbol;Acc:24731]                                                            |   |
| <b>NHP2L1</b>  | NHP2 non-histone chromosome protein 2-like 1 ( <i>S. Cerevisiae</i> ) [Source:HGNC Symbol;Acc:7819]               |   |

|                |                                                                                                |   |
|----------------|------------------------------------------------------------------------------------------------|---|
| <b>NHS</b>     | Nance-Horan syndrome (congenital cataracts and dental anomalies) [Source:HGNC Symbol;Acc:7820] |   |
| <b>NHSL1</b>   | NHS-like 1 [Source:HGNC Symbol;Acc:21021]                                                      |   |
| <b>NHSL2</b>   | NHS-like 2 [Source:HGNC Symbol;Acc:33737]                                                      |   |
| <b>NID1</b>    | Nidogen 1 [Source:HGNC Symbol;Acc:7821]                                                        |   |
| <b>NIF3L1</b>  | NIF3 NGG1 interacting factor 3-like 1 (S. Pombe) [Source:HGNC Symbol;Acc:13390]                |   |
| <b>NIN</b>     | Ninein (GSK3B interacting protein)                                                             | √ |
| <b>NINJ2</b>   | Ninjurin 2 [Source:HGNC Symbol;Acc:7825]                                                       |   |
| <b>NINL</b>    | Ninein-like [Source:HGNC Symbol;Acc:29163]                                                     |   |
| <b>NIPA1</b>   | Non imprinted in Prader-Willi/Angelman syndrome 1 [Source:HGNC Symbol;Acc:17043]               |   |
| <b>NIPAL1</b>  | NIPA-like domain containing 1 [Source:HGNC Symbol;Acc:27194]                                   |   |
| <b>NIPBL</b>   | Nipped-B homolog (Drosophila) [Source:HGNC Symbol;Acc:28862]                                   |   |
| <b>NISCH</b>   | Nischarin [Source:HGNC Symbol;Acc:18006]                                                       |   |
| <b>NKAIN2</b>  | Na+/K+ transporting atpase interacting 2 [Source:HGNC Symbol;Acc:16443]                        |   |
| <b>NKAP</b>    | NFKB activating protein [Source:HGNC Symbol;Acc:29873]                                         |   |
| <b>NKIRAS1</b> | NFKB inhibitor interacting Ras-like 1 [Source:HGNC Symbol;Acc:17899]                           |   |
| <b>NKPD1</b>   | Ntpase, KAP family P-loop domain containing 1 [Source:HGNC Symbol;Acc:24739]                   |   |
| <b>NLE1</b>    | Notchless homolog 1 (Drosophila) [Source:HGNC Symbol;Acc:19889]                                |   |
| <b>NLGN1</b>   | Neuroigin 1 [Source:HGNC Symbol;Acc:14291]                                                     |   |
| <b>NLGN3</b>   | Neuroigin 3 [Source:HGNC Symbol;Acc:14289]                                                     |   |
| <b>NLGN4X</b>  | Neuroigin 4, X-linked [Source:HGNC Symbol;Acc:14287]                                           |   |
| <b>NLGN4Y</b>  | Neuroigin 4, Y-linked [Source:HGNC Symbol;Acc:15529]                                           |   |
| <b>NLN</b>     | Neurolysin (metallopeptidase M3 family) [Source:HGNC Symbol;Acc:16058]                         |   |
| <b>NLRC3</b>   | NLR family, CARD domain containing 3 [Source:HGNC Symbol;Acc:29889]                            |   |
| <b>NLRC5</b>   | NLR family, CARD domain containing 5 [Source:HGNC Symbol;Acc:29933]                            |   |
| <b>NLRP2</b>   | NLR family, pyrin domain containing 2 [Source:HGNC Symbol;Acc:22948]                           |   |

|                |                                                                                                             |   |
|----------------|-------------------------------------------------------------------------------------------------------------|---|
| <b>NLRP3</b>   | NLR family, pyrin domain containing 3 [Source:HGNC Symbol;Acc:16400]                                        |   |
| <b>NMB</b>     | Neuromedin B [Source:HGNC Symbol;Acc:7842]                                                                  |   |
| <b>NMBR</b>    | Neuromedin B receptor [Source:HGNC Symbol;Acc:7843]                                                         |   |
| <b>NME6</b>    | Non-metastatic cells 6, protein expressed in (nucleoside-diphosphate kinase) [Source:HGNC Symbol;Acc:20567] |   |
| <b>NMNAT3</b>  | Nicotinamide nucleotide adenylyltransferase 3 [Source:HGNC Symbol;Acc:20989]                                |   |
| <b>NMT2</b>    | N-myristoyltransferase 2 [Source:HGNC Symbol;Acc:7858]                                                      |   |
| <b>NMUR1</b>   | Neuromedin U receptor 1 [Source:HGNC Symbol;Acc:4518]                                                       |   |
| <b>NNMT</b>    | Nicotinamide N-methyltransferase [Source:HGNC Symbol;Acc:7861]                                              |   |
| <b>NOB1</b>    | NIN1/RPN12 binding protein 1 homolog (S. Cerevisiae) [Source:HGNC Symbol;Acc:29540]                         |   |
| <b>NOBOX</b>   | NOBOX oogenesis homeobox [Source:HGNC Symbol;Acc:22448]                                                     |   |
| <b>NOC4L</b>   | Nucleolar complex associated 4 homolog (S. Cerevisiae) [Source:HGNC Symbol;Acc:28461]                       |   |
| <b>NOD1</b>    | Nucleotide-binding oligomerization domain containing 1 [Source:HGNC Symbol;Acc:16390]                       |   |
| <b>NOD2</b>    | Nucleotide-binding oligomerization domain containing 2 [Source:HGNC Symbol;Acc:5331]                        |   |
| <b>NOL10</b>   | Nucleolar protein 10 [Source:HGNC Symbol;Acc:25862]                                                         |   |
| <b>NOL8</b>    | Nucleolar protein 8 [Source:HGNC Symbol;Acc:23387]                                                          |   |
| <b>NOLC1</b>   | Nucleolar and coiled-body phosphoprotein 1 [Source:HGNC Symbol;Acc:15608]                                   |   |
| <b>NOM1</b>    | Nucleolar protein with MIF4G domain 1 [Source:HGNC Symbol;Acc:13244]                                        |   |
| <b>NONO</b>    | Non-POU domain containing, octamer-binding                                                                  | √ |
| <b>NOP2</b>    | NOP2 nucleolar protein homolog (yeast) [Source:HGNC Symbol;Acc:7867]                                        |   |
| <b>NOS1</b>    | Nitric oxide synthase 1 (neuronal) [Source:HGNC Symbol;Acc:7872]                                            |   |
| <b>NOS1AP</b>  | Nitric oxide synthase 1 (neuronal) adaptor protein [Source:HGNC Symbol;Acc:16859]                           |   |
| <b>NOS2</b>    | Nitric oxide synthase 2, inducible [Source:HGNC Symbol;Acc:7873]                                            |   |
| <b>NOS3</b>    | Nitric oxide synthase 3 (endothelial cell) [Source:HGNC Symbol;Acc:7876]                                    |   |
| <b>NOSTRIN</b> | Nitric oxide synthase trafficker [Source:HGNC Symbol;Acc:20203]                                             |   |

|                 |                                                                                                                        |   |
|-----------------|------------------------------------------------------------------------------------------------------------------------|---|
| <b>NOTCH1</b>   | Notch 1                                                                                                                | √ |
| <b>NOTCH2</b>   | Notch 2                                                                                                                | √ |
| <b>NOTCH2NL</b> | Notch 2 N-terminal like [Source:HGNC Symbol;Acc:31862]                                                                 |   |
| <b>NOTCH3</b>   | Notch 3 [Source:HGNC Symbol;Acc:7883]                                                                                  |   |
| <b>NOTCH4</b>   | Notch 4 [Source:HGNC Symbol;Acc:7884]                                                                                  |   |
| <b>NOTUM</b>    | Notum pectinacetylerase homolog (Drosophila) [Source:HGNC Symbol;Acc:27106]                                            |   |
| <b>NOVA1</b>    | Neuro-oncological ventral antigen 1 [Source:HGNC Symbol;Acc:7886]                                                      |   |
| <b>NOVA2</b>    | Neuro-oncological ventral antigen 2 [Source:HGNC Symbol;Acc:7887]                                                      |   |
| <b>NOX5</b>     | NADPH oxidase, EF-hand calcium binding domain 5 [Source:HGNC Symbol;Acc:14874]                                         |   |
| <b>NPAS4</b>    | Neuronal PAS domain protein 4 [Source:HGNC Symbol;Acc:18983]                                                           |   |
| <b>NPC1</b>     | Niemann-Pick disease, type C1 [Source:HGNC Symbol;Acc:7897]                                                            |   |
| <b>NPEPL1</b>   | Aminopeptidase-like 1 [Source:HGNC Symbol;Acc:16244]                                                                   |   |
| <b>NPFF</b>     | Neuropeptide FF-amide peptide precursor [Source:HGNC Symbol;Acc:7901]                                                  |   |
| <b>NPHP1</b>    | Nephronophthisis 1 (juvenile) [Source:HGNC Symbol;Acc:7905]                                                            |   |
| <b>NPHP3</b>    | Nephronophthisis 3 (adolescent) [Source:HGNC Symbol;Acc:7907]                                                          |   |
| <b>NPHP4</b>    | Nephronophthisis 4 [Source:HGNC Symbol;Acc:19104]                                                                      |   |
| <b>NPHS1</b>    | Nephrosis 1, congenital, Finnish type (nephrin) [Source:HGNC Symbol;Acc:7908]                                          |   |
| <b>NPLOC4</b>   | Nuclear protein localization 4 homolog (S. Cerevisiae) [Source:HGNC Symbol;Acc:18261]                                  |   |
| <b>NPR1</b>     | Natriuretic peptide receptor A/guanylate cyclase A (atrionatriuretic peptide receptor A) [Source:HGNC Symbol;Acc:7943] |   |
| <b>NPRL2</b>    | Nitrogen permease regulator-like 2 (S. Cerevisiae) [Source:HGNC Symbol;Acc:24969]                                      |   |
| <b>NPTN</b>     | Neuroplastin [Source:HGNC Symbol;Acc:17867]                                                                            |   |
| <b>NPY5R</b>    | Neuropeptide Y receptor Y5 [Source:HGNC Symbol;Acc:7958]                                                               |   |
| <b>NQO1</b>     | NAD(P)H dehydrogenase, quinone 1 [Source:HGNC Symbol;Acc:2874]                                                         |   |
| <b>NR1D1</b>    | Nuclear receptor subfamily 1, group D, member 1 [Source:HGNC Symbol;Acc:7962]                                          |   |

|              |                                                                                                         |  |
|--------------|---------------------------------------------------------------------------------------------------------|--|
| <b>NR1H2</b> | Nuclear receptor subfamily 1, group H, member 2 [Source:HGNC Symbol;Acc:7965]                           |  |
| <b>NR1H3</b> | Nuclear receptor subfamily 1, group H, member 3 [Source:HGNC Symbol;Acc:7966]                           |  |
| <b>NR1H4</b> | Nuclear receptor subfamily 1, group H, member 4 [Source:HGNC Symbol;Acc:7967]                           |  |
| <b>NR1I2</b> | Nuclear receptor subfamily 1, group I, member 2 [Source:HGNC Symbol;Acc:7968]                           |  |
| <b>NR2E1</b> | Nuclear receptor subfamily 2, group E, member 1 [Source:HGNC Symbol;Acc:7973]                           |  |
| <b>NR2F1</b> | Nuclear receptor subfamily 2, group F, member 1 [Source:HGNC Symbol;Acc:7975]                           |  |
| <b>NR2F2</b> | Nuclear receptor subfamily 2, group F, member 2 [Source:HGNC Symbol;Acc:7976]                           |  |
| <b>NR3C1</b> | Nuclear receptor subfamily 3, group C, member 1 (glucocorticoid receptor) [Source:HGNC Symbol;Acc:7978] |  |
| <b>NR3C2</b> | Nuclear receptor subfamily 3, group C, member 2 [Source:HGNC Symbol;Acc:7979]                           |  |
| <b>NRAP</b>  | Nebulin-related anchoring protein [Source:HGNC Symbol;Acc:7988]                                         |  |
| <b>NRARP</b> | NOTCH-regulated ankyrin repeat protein [Source:HGNC Symbol;Acc:33843]                                   |  |
| <b>NRBP1</b> | Nuclear receptor binding protein 1 [Source:HGNC Symbol;Acc:7993]                                        |  |
| <b>NRBP2</b> | Nuclear receptor binding protein 2 [Source:HGNC Symbol;Acc:19339]                                       |  |
| <b>NRF1</b>  | Nuclear respiratory factor 1 [Source:HGNC Symbol;Acc:7996]                                              |  |
| <b>NRG2</b>  | Neuregulin 2 [Source:HGNC Symbol;Acc:7998]                                                              |  |
| <b>NRGN</b>  | Neurogranin (protein kinase C substrate, RC3) [Source:HGNC Symbol;Acc:8000]                             |  |
| <b>NRIP2</b> | Nuclear receptor interacting protein 2 [Source:HGNC Symbol;Acc:23078]                                   |  |
| <b>NRM</b>   | Nurim (nuclear envelope membrane protein) [Source:HGNC Symbol;Acc:8003]                                 |  |
| <b>NRP1</b>  | Neuropilin 1 [Source:HGNC Symbol;Acc:8004]                                                              |  |
| <b>NRP2</b>  | Neuropilin 2 [Source:HGNC Symbol;Acc:8005]                                                              |  |
| <b>NRXN1</b> | Neurexin 1 [Source:HGNC Symbol;Acc:8008]                                                                |  |

|               |                                                                                               |   |
|---------------|-----------------------------------------------------------------------------------------------|---|
| <b>NRXN3</b>  | Neurexin 3 [Source:HGNC Symbol;Acc:8010]                                                      |   |
| <b>NSA2</b>   | NSA2 ribosome biogenesis homolog (S. Cerevisiae) [Source:HGNC Symbol;Acc:30728]               |   |
| <b>NSF</b>    | N-ethylmaleimide-sensitive factor [Source:HGNC Symbol;Acc:8016]                               |   |
| <b>NSMAF</b>  | Neutral sphingomyelinase (N-smase) activation associated factor [Source:HGNC Symbol;Acc:8017] |   |
| <b>NSUN4</b>  | NOP2/Sun domain family, member 4 [Source:HGNC Symbol;Acc:31802]                               |   |
| <b>NSUN5</b>  | NOP2/Sun domain family, member 5 [Source:HGNC Symbol;Acc:16385]                               |   |
| <b>NSUN7</b>  | NOP2/Sun domain family, member 7 [Source:HGNC Symbol;Acc:25857]                               |   |
| <b>NT5C1A</b> | 5'-nucleotidase, cytosolic IA [Source:HGNC Symbol;Acc:17819]                                  |   |
| <b>NT5C1B</b> | 5'-nucleotidase, cytosolic IB [Source:HGNC Symbol;Acc:17818]                                  |   |
| <b>NT5C2</b>  | 5'-nucleotidase, cytosolic II                                                                 | √ |
| <b>NT5DC3</b> | 5'-nucleotidase domain containing 3 [Source:HGNC Symbol;Acc:30826]                            |   |
| <b>NT5DC4</b> | 5'-nucleotidase domain containing 4 [Source:HGNC Symbol;Acc:27678]                            |   |
| <b>NT5M</b>   | 5',3'-nucleotidase, mitochondrial [Source:HGNC Symbol;Acc:15769]                              |   |
| <b>NTN5</b>   | Netrin 5 [Source:HGNC Symbol;Acc:25208]                                                       |   |
| <b>NTNG1</b>  | Netrin G1 [Source:HGNC Symbol;Acc:23319]                                                      |   |
| <b>NTNG2</b>  | Netrin G2 [Source:HGNC Symbol;Acc:14288]                                                      |   |
| <b>NTRK1</b>  | Neurotrophic tyrosine kinase, receptor, type 1 [Source:HGNC Symbol;Acc:8031]                  |   |
| <b>NTRK2</b>  | Neurotrophic tyrosine kinase, receptor, type 2 [Source:HGNC Symbol;Acc:8032]                  |   |
| <b>NTRK3</b>  | Neurotrophic tyrosine kinase, receptor, type 3                                                | √ |
| <b>NTSR1</b>  | Neurotensin receptor 1 (high affinity) [Source:HGNC Symbol;Acc:8039]                          |   |
| <b>NTSR2</b>  | Neurotensin receptor 2 [Source:HGNC Symbol;Acc:8040]                                          |   |
| <b>NUCB1</b>  | Nucleobindin 1 [Source:HGNC Symbol;Acc:8043]                                                  |   |
| <b>NUDT1</b>  | Nudix (nucleoside diphosphate linked moiety X)-type motif 1 [Source:HGNC Symbol;Acc:8048]     |   |
| <b>NUDT11</b> | Nudix (nucleoside diphosphate linked moiety X)-type motif 11 [Source:HGNC Symbol;Acc:18011]   |   |
| <b>NUDT14</b> | Nudix (nucleoside diphosphate linked moiety X)-type motif 14 [Source:HGNC Symbol;Acc:20141]   |   |

|                |                                                                                                      |   |
|----------------|------------------------------------------------------------------------------------------------------|---|
| <b>NUDT18</b>  | Nudix (nucleoside diphosphate linked moiety X)-type motif 18 [Source:HGNC Symbol;Acc:26194]          |   |
| <b>NUDT21</b>  | Nudix (nucleoside diphosphate linked moiety X)-type motif 21 [Source:HGNC Symbol;Acc:13870]          |   |
| <b>NUDT5</b>   | Nudix (nucleoside diphosphate linked moiety X)-type motif 5 [Source:HGNC Symbol;Acc:8052]            |   |
| <b>NUDT9</b>   | Nudix (nucleoside diphosphate linked moiety X)-type motif 9 [Source:HGNC Symbol;Acc:8056]            |   |
| <b>NUFIP1</b>  | Nuclear fragile X mental retardation protein interacting protein 1 [Source:HGNC Symbol;Acc:8057]     |   |
| <b>NUMBL</b>   | Numb homolog (Drosophila)-like [Source:HGNC Symbol;Acc:8061]                                         |   |
| <b>NUP133</b>  | Nucleoporin 133kda [Source:HGNC Symbol;Acc:18016]                                                    |   |
| <b>NUP188</b>  | Nucleoporin 188kda [Source:HGNC Symbol;Acc:17859]                                                    |   |
| <b>NUP205</b>  | Nucleoporin 205kda [Source:HGNC Symbol;Acc:18658]                                                    |   |
| <b>NUP210</b>  | Nucleoporin 210 kDa                                                                                  |   |
| <b>NUP210L</b> | Nucleoporin 210 kDa-like                                                                             |   |
| <b>NUP214</b>  | Nucleoporin 214 kDa                                                                                  | √ |
| <b>NUP50</b>   | Nucleoporin 50 kDa                                                                                   |   |
| <b>NUP85</b>   | Nucleoporin 85 kDa                                                                                   |   |
| <b>NUP93</b>   | Nucleoporin 93 kDa                                                                                   |   |
| <b>NUP98</b>   | Nucleoporin 98 kDa                                                                                   | √ |
| <b>NUPL1</b>   | Nucleoporin like 1 [Source:HGNC Symbol;Acc:20261]                                                    |   |
| <b>NUS1</b>    | Nuclear undecaprenyl pyrophosphate synthase 1 homolog (S. Cerevisiae) [Source:HGNC Symbol;Acc:21042] |   |
| <b>NUTF2</b>   | Nuclear transport factor 2 [Source:HGNC Symbol;Acc:13722]                                            |   |
| <b>NWD1</b>    | NACHT and WD repeat domain containing 1 [Source:HGNC Symbol;Acc:27619]                               |   |
| <b>NXF1</b>    | Nuclear RNA export factor 1 [Source:HGNC Symbol;Acc:8071]                                            |   |
| <b>NXPH1</b>   | Neurexophilin 1 [Source:HGNC Symbol;Acc:20693]                                                       |   |
| <b>NYNRIN</b>  | NYN domain and retroviral integrase containing [Source:HGNC Symbol;Acc:20165]                        |   |
| <b>OAF</b>     | OAF homolog (Drosophila) [Source:HGNC Symbol;Acc:28752]                                              |   |
| <b>OAZ1</b>    | Ornithine decarboxylase antizyme 1 [Source:HGNC Symbol;Acc:8095]                                     |   |



|                |                                                                                                                                                        |   |
|----------------|--------------------------------------------------------------------------------------------------------------------------------------------------------|---|
| <b>OBFC2A</b>  | Oligonucleotide/oligosaccharide-binding fold containing 2A [Source:HGNC Symbol;Acc:26232]                                                              |   |
| <b>OBSCN</b>   | Obscurin, cytoskeletal calmodulin and titin-interacting rhogef [Source:HGNC Symbol;Acc:15719]                                                          |   |
| <b>OBSL1</b>   | Obscurin-like 1 [Source:HGNC Symbol;Acc:29092]                                                                                                         |   |
| <b>OC90</b>    | Otoconin 90 [Source:HGNC Symbol;Acc:8100]                                                                                                              |   |
| <b>OCIAD2</b>  | OCIA domain containing 2 [Source:HGNC Symbol;Acc:28685]                                                                                                |   |
| <b>OCM</b>     | Oncomodulin [Source:HGNC Symbol;Acc:8105]                                                                                                              |   |
| <b>OCM2</b>    | Oncomodulin 2 [Source:HGNC Symbol;Acc:34396]                                                                                                           |   |
| <b>ODF1</b>    | Outer dense fiber of sperm tails 1 [Source:HGNC Symbol;Acc:8113]                                                                                       |   |
| <b>ODF4</b>    | Outer dense fiber of sperm tails 4 [Source:HGNC Symbol;Acc:19056]                                                                                      |   |
| <b>ODZ1</b>    | Odz, odd Oz/ten-m homolog 1(Drosophila) [Source:HGNC Symbol;Acc:8117]                                                                                  |   |
| <b>ODZ2</b>    | Odz, odd Oz/ten-m homolog 2 (Drosophila) [Source:HGNC Symbol;Acc:29943]                                                                                |   |
| <b>ODZ3</b>    | Odz, odd Oz/ten-m homolog 3 (Drosophila) [Source:HGNC Symbol;Acc:29944]                                                                                |   |
| <b>ODZ4</b>    | Odz, odd Oz/ten-m homolog 4 (Drosophila) [Source:HGNC Symbol;Acc:29945]                                                                                |   |
| <b>OGT</b>     | O-linked N-acetylglucosamine (glcnac) transferase (UDP-N-acetylglucosamine:polypeptide-N-acetylglucosaminyl transferase) [Source:HGNC Symbol;Acc:8127] |   |
| <b>OIP5</b>    | Opa interacting protein 5 [Source:HGNC Symbol;Acc:20300]                                                                                               |   |
| <b>OIT3</b>    | Oncoprotein induced transcript 3 [Source:HGNC Symbol;Acc:29953]                                                                                        |   |
| <b>OLA1</b>    | Obg-like atpase 1 [Source:HGNC Symbol;Acc:28833]                                                                                                       |   |
| <b>OLFM1</b>   | Olfactomedin 1 [Source:HGNC Symbol;Acc:17187]                                                                                                          |   |
| <b>OLFM3</b>   | Olfactomedin 3 [Source:HGNC Symbol;Acc:17990]                                                                                                          |   |
| <b>OLFML1</b>  | Olfactomedin-like 1 [Source:HGNC Symbol;Acc:24473]                                                                                                     |   |
| <b>OLFML2A</b> | Olfactomedin-like 2A [Source:HGNC Symbol;Acc:27270]                                                                                                    |   |
| <b>OLIG2</b>   | Oligodendrocyte lineage transcription factor 2                                                                                                         | √ |
| <b>ONECUT2</b> | One cut homeobox 2 [Source:HGNC Symbol;Acc:8139]                                                                                                       |   |
| <b>ONECUT3</b> | One cut homeobox 3 [Source:HGNC Symbol;Acc:13399]                                                                                                      |   |

|               |                                                                                                         |  |
|---------------|---------------------------------------------------------------------------------------------------------|--|
| <b>OPA3</b>   | Optic atrophy 3 (autosomal recessive, with chorea and spastic paraplegia) [Source:HGNC Symbol;Acc:8142] |  |
| <b>OPCML</b>  | Opioid binding protein/cell adhesion molecule-like [Source:HGNC Symbol;Acc:8143]                        |  |
| <b>OPHN1</b>  | Oligophrenin 1 [Source:HGNC Symbol;Acc:8148]                                                            |  |
| <b>OPLAH</b>  | 5-oxoprolinase (ATP-hydrolysing) [Source:HGNC Symbol;Acc:8149]                                          |  |
| <b>OPN5</b>   | Opsin 5 [Source:HGNC Symbol;Acc:19992]                                                                  |  |
| <b>OPRD1</b>  | Opioid receptor, delta 1 [Source:HGNC Symbol;Acc:8153]                                                  |  |
| <b>OPRK1</b>  | Opioid receptor, kappa 1 [Source:HGNC Symbol;Acc:8154]                                                  |  |
| <b>OPRM1</b>  | Opioid receptor, mu 1 [Source:HGNC Symbol;Acc:8156]                                                     |  |
| <b>OPTN</b>   | Optineurin [Source:HGNC Symbol;Acc:17142]                                                               |  |
| <b>OR10A6</b> | Olfactory receptor, family 10, subfamily A, member 6 [Source:HGNC Symbol;Acc:15132]                     |  |
| <b>OR10A7</b> | Olfactory receptor, family 10, subfamily A, member 7 [Source:HGNC Symbol;Acc:15329]                     |  |
| <b>OR10G4</b> | Olfactory receptor, family 10, subfamily G, member 4 [Source:HGNC Symbol;Acc:14809]                     |  |
| <b>OR10G7</b> | Olfactory receptor, family 10, subfamily G, member 7 [Source:HGNC Symbol;Acc:14842]                     |  |
| <b>OR10G9</b> | Olfactory receptor, family 10, subfamily G, member 9 [Source:HGNC Symbol;Acc:15129]                     |  |
| <b>OR10R2</b> | Olfactory receptor, family 10, subfamily R, member 2 [Source:HGNC Symbol;Acc:14820]                     |  |
| <b>OR11H6</b> | Olfactory receptor, family 11, subfamily H, member 6 [Source:HGNC Symbol;Acc:15349]                     |  |
| <b>OR12D3</b> | Olfactory receptor, family 12, subfamily D, member 3 [Source:HGNC Symbol;Acc:13963]                     |  |
| <b>OR1A1</b>  | Olfactory receptor, family 1, subfamily A, member 1 [Source:HGNC Symbol;Acc:8179]                       |  |
| <b>OR1B1</b>  | Olfactory receptor, family 1, subfamily B, member 1 [Source:HGNC Symbol;Acc:8181]                       |  |
| <b>OR1D2</b>  | Olfactory receptor, family 1, subfamily D, member 2 [Source:HGNC Symbol;Acc:8183]                       |  |

|               |                                                                                     |  |
|---------------|-------------------------------------------------------------------------------------|--|
| <b>OR1G1</b>  | Olfactory receptor, family 1, subfamily G, member 1 [Source:HGNC Symbol;Acc:8204]   |  |
| <b>OR1I1</b>  | Olfactory receptor, family 1, subfamily I, member 1 [Source:HGNC Symbol;Acc:8207]   |  |
| <b>OR1K1</b>  | Olfactory receptor, family 1, subfamily K, member 1 [Source:HGNC Symbol;Acc:8212]   |  |
| <b>OR1L4</b>  | Olfactory receptor, family 1, subfamily L, member 4 [Source:HGNC Symbol;Acc:8216]   |  |
| <b>OR1L6</b>  | Olfactory receptor, family 1, subfamily L, member 6 [Source:HGNC Symbol;Acc:8218]   |  |
| <b>OR2A14</b> | Olfactory receptor, family 2, subfamily A, member 14 [Source:HGNC Symbol;Acc:15084] |  |
| <b>OR2AE1</b> | Olfactory receptor, family 2, subfamily AE, member 1 [Source:HGNC Symbol;Acc:15087] |  |
| <b>OR2AG1</b> | Olfactory receptor, family 2, subfamily AG, member 1 [Source:HGNC Symbol;Acc:15142] |  |
| <b>OR2B11</b> | Olfactory receptor, family 2, subfamily B, member 11 [Source:HGNC Symbol;Acc:31249] |  |
| <b>OR2L13</b> | Olfactory receptor, family 2, subfamily L, member 13 [Source:HGNC Symbol;Acc:19578] |  |
| <b>OR2M2</b>  | Olfactory receptor, family 2, subfamily M, member 2 [Source:HGNC Symbol;Acc:8268]   |  |
| <b>OR2M3</b>  | Olfactory receptor, family 2, subfamily M, member 3 [Source:HGNC Symbol;Acc:8269]   |  |
| <b>OR2M4</b>  | Olfactory receptor, family 2, subfamily M, member 4 [Source:HGNC Symbol;Acc:8270]   |  |
| <b>OR2M5</b>  | Olfactory receptor, family 2, subfamily M, member 5 [Source:HGNC Symbol;Acc:19576]  |  |
| <b>OR2M7</b>  | Olfactory receptor, family 2, subfamily M, member 7 [Source:HGNC Symbol;Acc:19594]  |  |
| <b>OR3A1</b>  | Olfactory receptor, family 3, subfamily A, member 1 [Source:HGNC Symbol;Acc:8282]   |  |

|               |                                                                                     |  |
|---------------|-------------------------------------------------------------------------------------|--|
| <b>OR3A2</b>  | Olfactory receptor, family 3, subfamily A, member 2 [Source:HGNC Symbol;Acc:8283]   |  |
| <b>OR3A3</b>  | Olfactory receptor, family 3, subfamily A, member 3 [Source:HGNC Symbol;Acc:8284]   |  |
| <b>OR4A47</b> | Olfactory receptor, family 4, subfamily A, member 47 [Source:HGNC Symbol;Acc:31266] |  |
| <b>OR4D1</b>  | Olfactory receptor, family 4, subfamily D, member 1 [Source:HGNC Symbol;Acc:8293]   |  |
| <b>OR51B4</b> | Olfactory receptor, family 51, subfamily B, member 4 [Source:HGNC Symbol;Acc:14708] |  |
| <b>OR51G2</b> | Olfactory receptor, family 51, subfamily G, member 2 [Source:HGNC Symbol;Acc:15198] |  |
| <b>OR52B2</b> | Olfactory receptor, family 52, subfamily B, member 2 [Source:HGNC Symbol;Acc:15207] |  |
| <b>OR52B4</b> | Olfactory receptor, family 52, subfamily B, member 4 [Source:HGNC Symbol;Acc:15209] |  |
| <b>OR52L1</b> | Olfactory receptor, family 52, subfamily L, member 1 [Source:HGNC Symbol;Acc:14785] |  |
| <b>OR52N5</b> | Olfactory receptor, family 52, subfamily N, member 5 [Source:HGNC Symbol;Acc:15231] |  |
| <b>OR52R1</b> | Olfactory receptor, family 52, subfamily R, member 1 [Source:HGNC Symbol;Acc:15235] |  |
| <b>OR5C1</b>  | Olfactory receptor, family 5, subfamily C, member 1 [Source:HGNC Symbol;Acc:8331]   |  |
| <b>OR5L1</b>  | Olfactory receptor, family 5, subfamily L, member 1 [Source:HGNC Symbol;Acc:8350]   |  |
| <b>OR5L2</b>  | Olfactory receptor, family 5, subfamily L, member 2 [Source:HGNC Symbol;Acc:8351]   |  |
| <b>OR5M8</b>  | Olfactory receptor, family 5, subfamily M, member 8 [Source:HGNC Symbol;Acc:14846]  |  |
| <b>OR5R1</b>  | Olfactory receptor, family 5, subfamily R, member 1 [Source:HGNC Symbol;Acc:14841]  |  |

|               |                                                                                     |  |
|---------------|-------------------------------------------------------------------------------------|--|
| <b>OR6C2</b>  | Olfactory receptor, family 6, subfamily C, member 2 [Source:HGNC Symbol;Acc:15436]  |  |
| <b>OR6C68</b> | Olfactory receptor, family 6, subfamily C, member 68 [Source:HGNC Symbol;Acc:31297] |  |
| <b>OR6Q1</b>  | Olfactory receptor, family 6, subfamily Q, member 1 [Source:HGNC Symbol;Acc:15302]  |  |
| <b>OR6T1</b>  | Olfactory receptor, family 6, subfamily T, member 1 [Source:HGNC Symbol;Acc:14848]  |  |
| <b>OR7D2</b>  | Olfactory receptor, family 7, subfamily D, member 2 [Source:HGNC Symbol;Acc:8378]   |  |
| <b>OR7E24</b> | Olfactory receptor, family 7, subfamily E, member 24 [Source:HGNC Symbol;Acc:8396]  |  |
| <b>OR8A1</b>  | Olfactory receptor, family 8, subfamily A, member 1 [Source:HGNC Symbol;Acc:8469]   |  |
| <b>OR8H1</b>  | Olfactory receptor, family 8, subfamily H, member 1 [Source:HGNC Symbol;Acc:14824]  |  |
| <b>OR8I2</b>  | Olfactory receptor, family 8, subfamily I, member 2 [Source:HGNC Symbol;Acc:15310]  |  |
| <b>OR8K3</b>  | Olfactory receptor, family 8, subfamily K, member 3 [Source:HGNC Symbol;Acc:15313]  |  |
| <b>OR9K2</b>  | Olfactory receptor, family 9, subfamily K, member 2 [Source:HGNC Symbol;Acc:15339]  |  |
| <b>OR9Q1</b>  | Olfactory receptor, family 9, subfamily Q, member 1 [Source:HGNC Symbol;Acc:14724]  |  |
| <b>ORAI1</b>  | ORAI calcium release-activated calcium modulator 1 [Source:HGNC Symbol;Acc:25896]   |  |
| <b>ORAI2</b>  | ORAI calcium release-activated calcium modulator 2 [Source:HGNC Symbol;Acc:21667]   |  |
| <b>ORAOV1</b> | Oral cancer overexpressed 1 [Source:HGNC Symbol;Acc:17589]                          |  |
| <b>ORC1</b>   | Origin recognition complex, subunit 1 [Source:HGNC Symbol;Acc:8487]                 |  |
| <b>ORMDL2</b> | ORM1-like 2 ( <i>S. Cerevisiae</i> ) [Source:HGNC Symbol;Acc:16037]                 |  |
| <b>ORMDL3</b> | ORM1-like 3 ( <i>S. Cerevisiae</i> ) [Source:HGNC Symbol;Acc:16038]                 |  |
| <b>OSBP2</b>  | Oxysterol binding protein 2 [Source:HGNC Symbol;Acc:8504]                           |  |

|                |                                                                                    |  |
|----------------|------------------------------------------------------------------------------------|--|
| <b>OSBPL10</b> | Oxysterol binding protein-like 10 [Source:HGNC Symbol;Acc:16395]                   |  |
| <b>OSBPL1A</b> | Oxysterol binding protein-like 1A [Source:HGNC Symbol;Acc:16398]                   |  |
| <b>OSBPL3</b>  | Oxysterol binding protein-like 3 [Source:HGNC Symbol;Acc:16370]                    |  |
| <b>OSBPL5</b>  | Oxysterol binding protein-like 5 [Source:HGNC Symbol;Acc:16392]                    |  |
| <b>OSBPL6</b>  | Oxysterol binding protein-like 6 [Source:HGNC Symbol;Acc:16388]                    |  |
| <b>OSBPL8</b>  | Oxysterol binding protein-like 8 [Source:HGNC Symbol;Acc:16396]                    |  |
| <b>OSMR</b>    | Oncostatin M receptor [Source:HGNC Symbol;Acc:8507]                                |  |
| <b>OSTC</b>    | Oligosaccharyltransferase complex subunit [Source:HGNC Symbol;Acc:24448]           |  |
| <b>OSTM1</b>   | Osteopetrosis associated transmembrane protein 1 [Source:HGNC Symbol;Acc:21652]    |  |
| <b>OTOG</b>    | Otogelin [Source:HGNC Symbol;Acc:8516]                                             |  |
| <b>OTOGL</b>   | Otogelin-like [Source:HGNC Symbol;Acc:26901]                                       |  |
| <b>OTOP3</b>   | Otopettrin 3 [Source:HGNC Symbol;Acc:19658]                                        |  |
| <b>OTP</b>     | Orthopedia homeobox [Source:HGNC Symbol;Acc:8518]                                  |  |
| <b>OTUD4</b>   | OTU domain containing 4 [Source:HGNC Symbol;Acc:24949]                             |  |
| <b>OTUD7A</b>  | OTU domain containing 7A [Source:HGNC Symbol;Acc:20718]                            |  |
| <b>OVCH1</b>   | Ovochymase 1 [Source:HGNC Symbol;Acc:23080]                                        |  |
| <b>OXER1</b>   | Oxoecosanoid (OXE) receptor 1 [Source:HGNC Symbol;Acc:24884]                       |  |
| <b>OXNAD1</b>  | Oxidoreductase NAD-binding domain containing 1 [Source:HGNC Symbol;Acc:25128]      |  |
| <b>P2RX3</b>   | Purinergic receptor P2X, ligand-gated ion channel, 3 [Source:HGNC Symbol;Acc:8534] |  |
| <b>P2RX4</b>   | Purinergic receptor P2X, ligand-gated ion channel, 4 [Source:HGNC Symbol;Acc:8535] |  |
| <b>P2RX5</b>   | Purinergic receptor P2X, ligand-gated ion channel, 5 [Source:HGNC Symbol;Acc:8536] |  |
| <b>P2RX6</b>   | Purinergic receptor P2X, ligand-gated ion channel, 6 [Source:HGNC Symbol;Acc:8538] |  |
| <b>P2RY1</b>   | Purinergic receptor P2Y, G-protein coupled, 1 [Source:HGNC Symbol;Acc:8539]        |  |
| <b>P2RY12</b>  | Purinergic receptor P2Y, G-protein coupled, 12 [Source:HGNC Symbol;Acc:18124]      |  |

|                  |                                                                                         |   |
|------------------|-----------------------------------------------------------------------------------------|---|
| <b>P2RY14</b>    | Purinergic receptor P2Y, G-protein coupled, 14 [Source:HGNC Symbol;Acc:16442]           |   |
| <b>P2RY8</b>     | Purinergic receptor P2Y, G-protein coupled, 8                                           | √ |
| <b>P4HA1</b>     | Prolyl 4-hydroxylase, alpha polypeptide I [Source:HGNC Symbol;Acc:8546]                 |   |
| <b>P4HA2</b>     | Prolyl 4-hydroxylase, alpha polypeptide II [Source:HGNC Symbol;Acc:8547]                |   |
| <b>PABPC1</b>    | Poly(A) binding protein, cytoplasmic 1 [Source:HGNC Symbol;Acc:8554]                    |   |
| <b>PABPC1L2B</b> | Poly(A) binding protein, cytoplasmic 1-like 2B [Source:HGNC Symbol;Acc:31852]           |   |
| <b>PACS1</b>     | Phosphofurin acidic cluster sorting protein 1 [Source:HGNC Symbol;Acc:30032]            |   |
| <b>PACSN2</b>    | Protein kinase C and casein kinase substrate in neurons 2 [Source:HGNC Symbol;Acc:8571] |   |
| <b>PADI4</b>     | Peptidyl arginine deiminase, type IV [Source:HGNC Symbol;Acc:18368]                     |   |
| <b>PAFAH1B2</b>  | Platelet-activating factor acetylhydrolase 1b, catalytic subunit 2 (30 kDa)             | √ |
| <b>PAFAH1B3</b>  | Platelet-activating factor acetylhydrolase 1b, catalytic subunit 3 (29 kDa)             |   |
| <b>PAFAH2</b>    | Platelet-activating factor acetylhydrolase 2, 40kDa [Source:HGNC Symbol;Acc:8579]       |   |
| <b>PAGE1</b>     | P antigen family, member 1 (prostate associated) [Source:HGNC Symbol;Acc:4107]          |   |
| <b>PAGE4</b>     | P antigen family, member 4 (prostate associated) [Source:HGNC Symbol;Acc:4108]          |   |
| <b>PAK1</b>      | P21 protein (Cdc42/Rac)-activated kinase 1 [Source:HGNC Symbol;Acc:8590]                |   |
| <b>PAK2</b>      | P21 protein (Cdc42/Rac)-activated kinase 2 [Source:HGNC Symbol;Acc:8591]                |   |
| <b>PAK6</b>      | P21 protein (Cdc42/Rac)-activated kinase 6 [Source:HGNC Symbol;Acc:16061]               |   |
| <b>PAK7</b>      | P21 protein (Cdc42/Rac)-activated kinase 7 [Source:HGNC Symbol;Acc:15916]               |   |
| <b>PALB2</b>     | Partner and localizer of BRCA2                                                          | √ |
| <b>PALLD</b>     | Palladin, cytoskeletal associated protein [Source:HGNC Symbol;Acc:17068]                |   |

|                    |                                                                                                   |  |
|--------------------|---------------------------------------------------------------------------------------------------|--|
| <b>PALM2-AKAP2</b> | PALM2-AKAP2 readthrough [Source:HGNC Symbol;Acc:33529]                                            |  |
| <b>PAMR1</b>       | Peptidase domain containing associated with muscle regeneration 1 [Source:HGNC Symbol;Acc:24554]  |  |
| <b>PAN2</b>        | PAN2 poly(A) specific ribonuclease subunit homolog (S. Cerevisiae) [Source:HGNC Symbol;Acc:20074] |  |
| <b>PAN3</b>        | PAN3 poly(A) specific ribonuclease subunit homolog (S. Cerevisiae) [Source:HGNC Symbol;Acc:29991] |  |
| <b>PANK1</b>       | Pantothenate kinase 1 [Source:HGNC Symbol;Acc:8598]                                               |  |
| <b>PANK3</b>       | Pantothenate kinase 3 [Source:HGNC Symbol;Acc:19365]                                              |  |
| <b>PANX2</b>       | Pannexin 2 [Source:HGNC Symbol;Acc:8600]                                                          |  |
| <b>PAPD4</b>       | PAP associated domain containing 4 [Source:HGNC Symbol;Acc:26776]                                 |  |
| <b>PAPD5</b>       | PAP associated domain containing 5 [Source:HGNC Symbol;Acc:30758]                                 |  |
| <b>PAPD7</b>       | PAP associated domain containing 7 [Source:HGNC Symbol;Acc:16705]                                 |  |
| <b>PAPLN</b>       | Papilin, proteoglycan-like sulfated glycoprotein [Source:HGNC Symbol;Acc:19262]                   |  |
| <b>PAPPA</b>       | Pregnancy-associated plasma protein A, pappalysin 1 [Source:HGNC Symbol;Acc:8602]                 |  |
| <b>PAPPA2</b>      | Pappalysin 2 [Source:HGNC Symbol;Acc:14615]                                                       |  |
| <b>PAQR3</b>       | Progesterin and adiponectin receptor family member III [Source:HGNC Symbol;Acc:30130]             |  |
| <b>PAQR5</b>       | Progesterin and adiponectin receptor family member V [Source:HGNC Symbol;Acc:29645]               |  |
| <b>PAQR6</b>       | Progesterin and adiponectin receptor family member VI [Source:HGNC Symbol;Acc:30132]              |  |
| <b>PAQR8</b>       | Progesterin and adiponectin receptor family member VIII [Source:HGNC Symbol;Acc:15708]            |  |
| <b>PARD3B</b>      | Par-3 partitioning defective 3 homolog B (C. Elegans) [Source:HGNC Symbol;Acc:14446]              |  |
| <b>PARD6B</b>      | Par-6 partitioning defective 6 homolog beta (C. Elegans) [Source:HGNC Symbol;Acc:16245]           |  |
| <b>PARD6G</b>      | Par-6 partitioning defective 6 homolog gamma (C. Elegans) [Source:HGNC Symbol;Acc:16076]          |  |



|               |                                                                                           |   |
|---------------|-------------------------------------------------------------------------------------------|---|
| <b>PARM1</b>  | Prostate androgen-regulated mucin-like protein 1 [Source:HGNC Symbol;Acc:24536]           |   |
| <b>PARP10</b> | Poly (ADP-ribose) polymerase family, member 10 [Source:HGNC Symbol;Acc:25895]             |   |
| <b>PARP11</b> | Poly (ADP-ribose) polymerase family, member 11 [Source:HGNC Symbol;Acc:1186]              |   |
| <b>PARP12</b> | Poly (ADP-ribose) polymerase family, member 12 [Source:HGNC Symbol;Acc:21919]             |   |
| <b>PARP15</b> | Poly (ADP-ribose) polymerase family, member 15 [Source:HGNC Symbol;Acc:26876]             |   |
| <b>PARP2</b>  | Poly (ADP-ribose) polymerase 2 [Source:HGNC Symbol;Acc:272]                               |   |
| <b>PARP8</b>  | Poly (ADP-ribose) polymerase family, member 8 [Source:HGNC Symbol;Acc:26124]              |   |
| <b>PARS2</b>  | Prolyl-trna synthetase 2, mitochondrial (putative) [Source:HGNC Symbol;Acc:30563]         |   |
| <b>PARVB</b>  | Parvin, beta [Source:HGNC Symbol;Acc:14653]                                               |   |
| <b>PASK</b>   | PAS domain containing serine/threonine kinase [Source:HGNC Symbol;Acc:17270]              |   |
| <b>PATL1</b>  | Protein associated with topoisomerase II homolog 1 (yeast) [Source:HGNC Symbol;Acc:26721] |   |
| <b>PAX2</b>   | Paired box 2 [Source:HGNC Symbol;Acc:8616]                                                |   |
| <b>PAX4</b>   | Paired box 4 [Source:HGNC Symbol;Acc:8618]                                                |   |
| <b>PAX5</b>   | Paired box 5                                                                              | √ |
| <b>PAX6</b>   | Paired box 6 [Source:HGNC Symbol;Acc:8620]                                                |   |
| <b>PAX7</b>   | Paired box 7                                                                              | √ |
| <b>PBLD</b>   | Phenazine biosynthesis-like protein domain containing [Source:HGNC Symbol;Acc:23301]      |   |
| <b>PBRM1</b>  | Polybromo 1                                                                               | √ |
| <b>PBX1</b>   | Pre-B-cell leukemia homeobox 1                                                            | √ |
| <b>PBX2</b>   | Pre-B-cell leukemia homeobox 2 [Source:HGNC Symbol;Acc:8633]                              |   |
| <b>PC</b>     | Pyruvate carboxylase [Source:HGNC Symbol;Acc:8636]                                        |   |

|                |                                                                                                                                             |  |
|----------------|---------------------------------------------------------------------------------------------------------------------------------------------|--|
| <b>PCBD2</b>   | Pterin-4 alpha-carbinolamine dehydratase/dimerization cofactor of hepatocyte nuclear factor 1 alpha (TCF1) 2 [Source:HGNC Symbol;Acc:24474] |  |
| <b>PCBP2</b>   | Poly(rc) binding protein 2 [Source:HGNC Symbol;Acc:8648]                                                                                    |  |
| <b>PCBP3</b>   | Poly(rc) binding protein 3 [Source:HGNC Symbol;Acc:8651]                                                                                    |  |
| <b>PCCB</b>    | Propionyl coa carboxylase, beta polypeptide [Source:HGNC Symbol;Acc:8654]                                                                   |  |
| <b>PCDH10</b>  | Protocadherin 10 [Source:HGNC Symbol;Acc:13404]                                                                                             |  |
| <b>PCDH11X</b> | Protocadherin 11 X-linked [Source:HGNC Symbol;Acc:8656]                                                                                     |  |
| <b>PCDH11Y</b> | Protocadherin 11 Y-linked [Source:HGNC Symbol;Acc:15813]                                                                                    |  |
| <b>PCDH12</b>  | Protocadherin 12 [Source:HGNC Symbol;Acc:8657]                                                                                              |  |
| <b>PCDH15</b>  | Protocadherin-related 15 [Source:HGNC Symbol;Acc:14674]                                                                                     |  |
| <b>PCDH19</b>  | Protocadherin 19 [Source:HGNC Symbol;Acc:14270]                                                                                             |  |
| <b>PCDH8</b>   | Protocadherin 8 [Source:HGNC Symbol;Acc:8660]                                                                                               |  |
| <b>PCDH9</b>   | Protocadherin 9 [Source:HGNC Symbol;Acc:8661]                                                                                               |  |
| <b>PCDHA1</b>  | Protocadherin alpha 1 [Source:HGNC Symbol;Acc:8663]                                                                                         |  |
| <b>PCDHA10</b> | Protocadherin alpha 10 [Source:HGNC Symbol;Acc:8664]                                                                                        |  |
| <b>PCDHA11</b> | Protocadherin alpha 11 [Source:HGNC Symbol;Acc:8665]                                                                                        |  |
| <b>PCDHA12</b> | Protocadherin alpha 12 [Source:HGNC Symbol;Acc:8666]                                                                                        |  |
| <b>PCDHA13</b> | Protocadherin alpha 13 [Source:HGNC Symbol;Acc:8667]                                                                                        |  |
| <b>PCDHA2</b>  | Protocadherin alpha 2 [Source:HGNC Symbol;Acc:8668]                                                                                         |  |
| <b>PCDHA3</b>  | Protocadherin alpha 3 [Source:HGNC Symbol;Acc:8669]                                                                                         |  |
| <b>PCDHA4</b>  | Protocadherin alpha 4 [Source:HGNC Symbol;Acc:8670]                                                                                         |  |
| <b>PCDHA5</b>  | Protocadherin alpha 5 [Source:HGNC Symbol;Acc:8671]                                                                                         |  |
| <b>PCDHA6</b>  | Protocadherin alpha 6 [Source:HGNC Symbol;Acc:8672]                                                                                         |  |
| <b>PCDHA7</b>  | Protocadherin alpha 7 [Source:HGNC Symbol;Acc:8673]                                                                                         |  |
| <b>PCDHA8</b>  | Protocadherin alpha 8 [Source:HGNC Symbol;Acc:8674]                                                                                         |  |
| <b>PCDHA9</b>  | Protocadherin alpha 9 [Source:HGNC Symbol;Acc:8675]                                                                                         |  |
| <b>PCDHAC1</b> | Protocadherin alpha subfamily C, 1 [Source:HGNC Symbol;Acc:8676]                                                                            |  |
| <b>PCDHAC2</b> | Protocadherin alpha subfamily C, 2 [Source:HGNC Symbol;Acc:8677]                                                                            |  |
| <b>PCDHB13</b> | Protocadherin beta 13 [Source:HGNC Symbol;Acc:8684]                                                                                         |  |
| <b>PCDHB15</b> | Protocadherin beta 15 [Source:HGNC Symbol;Acc:8686]                                                                                         |  |
| <b>PCDHB16</b> | Protocadherin beta 16 [Source:HGNC Symbol;Acc:14546]                                                                                        |  |

|                 |                                                                                                            |  |
|-----------------|------------------------------------------------------------------------------------------------------------|--|
| <b>PCDHB3</b>   | Protocadherin beta 3 [Source:HGNC Symbol;Acc:8688]                                                         |  |
| <b>PCDHB4</b>   | Protocadherin beta 4 [Source:HGNC Symbol;Acc:8689]                                                         |  |
| <b>PCDHB6</b>   | Protocadherin beta 6 [Source:HGNC Symbol;Acc:8691]                                                         |  |
| <b>PCDHB7</b>   | Protocadherin beta 7 [Source:HGNC Symbol;Acc:8692]                                                         |  |
| <b>PCDHGA1</b>  | Protocadherin gamma subfamily A, 1 [Source:HGNC Symbol;Acc:8696]                                           |  |
| <b>PCDHGA11</b> | Protocadherin gamma subfamily A, 11 [Source:HGNC Symbol;Acc:8698]                                          |  |
| <b>PCDHGA5</b>  | Protocadherin gamma subfamily A, 5 [Source:HGNC Symbol;Acc:8703]                                           |  |
| <b>PCDHGA6</b>  | Protocadherin gamma subfamily A, 6 [Source:HGNC Symbol;Acc:8704]                                           |  |
| <b>PCDHGA7</b>  | Protocadherin gamma subfamily A, 7 [Source:HGNC Symbol;Acc:8705]                                           |  |
| <b>PCDHGC3</b>  | Protocadherin gamma subfamily C, 3 [Source:HGNC Symbol;Acc:8716]                                           |  |
| <b>PCF11</b>    | PCF11, cleavage and polyadenylation factor subunit, homolog (S. Cerevisiae) [Source:HGNC Symbol;Acc:30097] |  |
| <b>PCGF2</b>    | Polycomb group ring finger 2 [Source:HGNC Symbol;Acc:12929]                                                |  |
| <b>PCGF3</b>    | Polycomb group ring finger 3 [Source:HGNC Symbol;Acc:10066]                                                |  |
| <b>PCNT</b>     | Pericentrin [Source:HGNC Symbol;Acc:16068]                                                                 |  |
| <b>PCNX</b>     | Pecanex homolog (Drosophila) [Source:HGNC Symbol;Acc:19740]                                                |  |
| <b>PCSK5</b>    | Proprotein convertase subtilisin/kexin type 5 [Source:HGNC Symbol;Acc:8747]                                |  |
| <b>PCSK6</b>    | Proprotein convertase subtilisin/kexin type 6 [Source:HGNC Symbol;Acc:8569]                                |  |
| <b>PCSK9</b>    | Proprotein convertase subtilisin/kexin type 9 [Source:HGNC Symbol;Acc:20001]                               |  |
| <b>PCYOX1</b>   | Preylcysteine oxidase 1 [Source:HGNC Symbol;Acc:20588]                                                     |  |
| <b>PCYOX1L</b>  | Preylcysteine oxidase 1 like [Source:HGNC Symbol;Acc:28477]                                                |  |
| <b>PDCD11</b>   | Programmed cell death 11 [Source:HGNC Symbol;Acc:13408]                                                    |  |
| <b>PDCD5</b>    | Programmed cell death 5 [Source:HGNC Symbol;Acc:8764]                                                      |  |
| <b>PDCD6IP</b>  | Programmed cell death 6 interacting protein [Source:HGNC Symbol;Acc:8766]                                  |  |
| <b>PDCD7</b>    | Programmed cell death 7 [Source:HGNC Symbol;Acc:8767]                                                      |  |
| <b>PDDC1</b>    | Parkinson disease 7 domain containing 1 [Source:HGNC Symbol;Acc:26616]                                     |  |
| <b>PDE1A</b>    | Phosphodiesterase 1A, calmodulin-dependent [Source:HGNC Symbol;Acc:8774]                                   |  |

|                |                                                                                       |   |
|----------------|---------------------------------------------------------------------------------------|---|
| <b>PDE1B</b>   | Phosphodiesterase 1B, calmodulin-dependent [Source:HGNC Symbol;Acc:8775]              |   |
| <b>PDE2A</b>   | Phosphodiesterase 2A, cgmp-stimulated [Source:HGNC Symbol;Acc:8777]                   |   |
| <b>PDE4DIP</b> | Phosphodiesterase 4D interacting protein                                              | √ |
| <b>PDE7A</b>   | Phosphodiesterase 7A [Source:HGNC Symbol;Acc:8791]                                    |   |
| <b>PDE7B</b>   | Phosphodiesterase 7B [Source:HGNC Symbol;Acc:8792]                                    |   |
| <b>PDE8A</b>   | Phosphodiesterase 8A [Source:HGNC Symbol;Acc:8793]                                    |   |
| <b>PDE8B</b>   | Phosphodiesterase 8B [Source:HGNC Symbol;Acc:8794]                                    |   |
| <b>PDE9A</b>   | Phosphodiesterase 9A [Source:HGNC Symbol;Acc:8795]                                    |   |
| <b>PDGFD</b>   | Platelet derived growth factor D [Source:HGNC Symbol;Acc:30620]                       |   |
| <b>PDGFRA</b>  | Platelet-derived growth factor receptor, alpha polypeptide                            | √ |
| <b>PDGFRB</b>  | Platelet-derived growth factor receptor, beta polypeptide                             | √ |
| <b>PDGFRL</b>  | Platelet-derived growth factor receptor-like [Source:HGNC Symbol;Acc:8805]            |   |
| <b>PDHA2</b>   | Pyruvate dehydrogenase (lipoamide) alpha 2 [Source:HGNC Symbol;Acc:8807]              |   |
| <b>PDIA6</b>   | Protein disulfide isomerase family A, member 6 [Source:HGNC Symbol;Acc:30168]         |   |
| <b>PDIK1L</b>  | PDLIM1 interacting kinase 1 like [Source:HGNC Symbol;Acc:18981]                       |   |
| <b>PDILT</b>   | Protein disulfide isomerase-like, testis expressed [Source:HGNC Symbol;Acc:27338]     |   |
| <b>PDK2</b>    | Pyruvate dehydrogenase kinase, isozyme 2 [Source:HGNC Symbol;Acc:8810]                |   |
| <b>PDK4</b>    | Pyruvate dehydrogenase kinase, isozyme 4 [Source:HGNC Symbol;Acc:8812]                |   |
| <b>PDLIM1</b>  | PDZ and LIM domain 1 [Source:HGNC Symbol;Acc:2067]                                    |   |
| <b>PDLIM4</b>  | PDZ and LIM domain 4 [Source:HGNC Symbol;Acc:16501]                                   |   |
| <b>PDLIM5</b>  | PDZ and LIM domain 5 [Source:HGNC Symbol;Acc:17468]                                   |   |
| <b>PDP1</b>    | Pyruvate dehydrogenase phosphatase catalytic subunit 1 [Source:HGNC Symbol;Acc:9279]  |   |
| <b>PDP2</b>    | Pyruvate dehydrogenase phosphatase catalytic subunit 2 [Source:HGNC Symbol;Acc:30263] |   |

|                |                                                                                                            |   |
|----------------|------------------------------------------------------------------------------------------------------------|---|
| <b>PDPK1</b>   | 3-phosphoinositide dependent protein kinase-1 [Source:HGNC Symbol;Acc:8816]                                |   |
| <b>PDPR</b>    | Pyruvate dehydrogenase phosphatase regulatory subunit [Source:HGNC Symbol;Acc:30264]                       |   |
| <b>PDRG1</b>   | P53 and DNA-damage regulated 1 [Source:HGNC Symbol;Acc:16119]                                              |   |
| <b>PDS5B</b>   | PDS5, regulator of cohesion maintenance, homolog B ( <i>S. Cerevisiae</i> ) [Source:HGNC Symbol;Acc:20418] |   |
| <b>PDSS2</b>   | Prenyl (decaprenyl) diphosphate synthase, subunit 2 [Source:HGNC Symbol;Acc:23041]                         |   |
| <b>PDXDC1</b>  | Pyridoxal-dependent decarboxylase domain containing 1 [Source:HGNC Symbol;Acc:28995]                       |   |
| <b>PDZD2</b>   | PDZ domain containing 2 [Source:HGNC Symbol;Acc:18486]                                                     |   |
| <b>PDZD3</b>   | PDZ domain containing 3 [Source:HGNC Symbol;Acc:19891]                                                     |   |
| <b>PDZRN3</b>  | PDZ domain containing ring finger 3 [Source:HGNC Symbol;Acc:17704]                                         |   |
| <b>PDZRN4</b>  | PDZ domain containing ring finger 4 [Source:HGNC Symbol;Acc:30552]                                         |   |
| <b>PEF1</b>    | Penta-EF-hand domain containing 1 [Source:HGNC Symbol;Acc:30009]                                           |   |
| <b>PELI2</b>   | Pellino homolog 2 ( <i>Drosophila</i> ) [Source:HGNC Symbol;Acc:8828]                                      |   |
| <b>PELI3</b>   | Pellino homolog 3 ( <i>Drosophila</i> ) [Source:HGNC Symbol;Acc:30010]                                     |   |
| <b>PEPD</b>    | Peptidase D [Source:HGNC Symbol;Acc:8840]                                                                  |   |
| <b>PER1</b>    | Period homolog 1 ( <i>Drosophila</i> )                                                                     | √ |
| <b>PER2</b>    | Period homolog 2 ( <i>Drosophila</i> ) [Source:HGNC Symbol;Acc:8846]                                       |   |
| <b>PER3</b>    | Period homolog 3 ( <i>Drosophila</i> ) [Source:HGNC Symbol;Acc:8847]                                       |   |
| <b>PES1</b>    | Pescadillo homolog 1, containing BRCT domain (zebrafish) [Source:HGNC Symbol;Acc:8848]                     |   |
| <b>PET112L</b> | PET112-like (yeast) [Source:HGNC Symbol;Acc:8849]                                                          |   |
| <b>PEX11B</b>  | Peroxisomal biogenesis factor 11 beta [Source:HGNC Symbol;Acc:8853]                                        |   |
| <b>PEX12</b>   | Peroxisomal biogenesis factor 12 [Source:HGNC Symbol;Acc:8854]                                             |   |
| <b>PEX13</b>   | Peroxisomal biogenesis factor 13 [Source:HGNC Symbol;Acc:8855]                                             |   |
| <b>PEX2</b>    | Peroxisomal biogenesis factor 2 [Source:HGNC Symbol;Acc:9717]                                              |   |
| <b>PEX5</b>    | Peroxisomal biogenesis factor 5 [Source:HGNC Symbol;Acc:9719]                                              |   |
| <b>PEX5L</b>   | Peroxisomal biogenesis factor 5-like [Source:HGNC Symbol;Acc:30024]                                        |   |
| <b>PFAS</b>    | Phosphoribosylformylglycinamide synthase [Source:HGNC Symbol;Acc:8863]                                     |   |

|                |                                                                                     |  |
|----------------|-------------------------------------------------------------------------------------|--|
| <b>PFDN2</b>   | Prefoldin subunit 2 [Source:HGNC Symbol;Acc:8867]                                   |  |
| <b>PFDN4</b>   | Prefoldin subunit 4 [Source:HGNC Symbol;Acc:8868]                                   |  |
| <b>PFKFB2</b>  | 6-phosphofructo-2-kinase/fructose-2,6-biphosphatase 2 [Source:HGNC Symbol;Acc:8873] |  |
| <b>PFKFB4</b>  | 6-phosphofructo-2-kinase/fructose-2,6-biphosphatase 4 [Source:HGNC Symbol;Acc:8875] |  |
| <b>PFKM</b>    | Phosphofructokinase, muscle [Source:HGNC Symbol;Acc:8877]                           |  |
| <b>PGAP2</b>   | Post-GPI attachment to proteins 2 [Source:HGNC Symbol;Acc:17893]                    |  |
| <b>PGAP3</b>   | Post-GPI attachment to proteins 3 [Source:HGNC Symbol;Acc:23719]                    |  |
| <b>PGBD5</b>   | Piggybac transposable element derived 5 [Source:HGNC Symbol;Acc:19405]              |  |
| <b>PGD</b>     | Phosphogluconate dehydrogenase [Source:HGNC Symbol;Acc:8891]                        |  |
| <b>PGK1</b>    | Phosphoglycerate kinase 1 [Source:HGNC Symbol;Acc:8896]                             |  |
| <b>PGK2</b>    | Phosphoglycerate kinase 2 [Source:HGNC Symbol;Acc:8898]                             |  |
| <b>PGM1</b>    | Phosphoglucomutase 1 [Source:HGNC Symbol;Acc:8905]                                  |  |
| <b>PGM2</b>    | Phosphoglucomutase 2 [Source:HGNC Symbol;Acc:8906]                                  |  |
| <b>PGR</b>     | Progesterone receptor [Source:HGNC Symbol;Acc:8910]                                 |  |
| <b>PGRMC1</b>  | Progesterone receptor membrane component 1 [Source:HGNC Symbol;Acc:16090]           |  |
| <b>PGRMC2</b>  | Progesterone receptor membrane component 2 [Source:HGNC Symbol;Acc:16089]           |  |
| <b>PGS1</b>    | Phosphatidylglycerophosphate synthase 1 [Source:HGNC Symbol;Acc:30029]              |  |
| <b>PHACTR1</b> | Phosphatase and actin regulator 1 [Source:HGNC Symbol;Acc:20990]                    |  |
| <b>PHACTR4</b> | Phosphatase and actin regulator 4 [Source:HGNC Symbol;Acc:25793]                    |  |
| <b>PHC2</b>    | Polyhomeotic homolog 2 (Drosophila) [Source:HGNC Symbol;Acc:3183]                   |  |
| <b>PHF1</b>    | PHD finger protein 1 [Source:HGNC Symbol;Acc:8919]                                  |  |
| <b>PHF10</b>   | PHD finger protein 10 [Source:HGNC Symbol;Acc:18250]                                |  |
| <b>PHF12</b>   | PHD finger protein 12 [Source:HGNC Symbol;Acc:20816]                                |  |
| <b>PHF14</b>   | PHD finger protein 14 [Source:HGNC Symbol;Acc:22203]                                |  |
| <b>PHF15</b>   | PHD finger protein 15 [Source:HGNC Symbol;Acc:22984]                                |  |
| <b>PHF16</b>   | PHD finger protein 16 [Source:HGNC Symbol;Acc:22982]                                |  |
| <b>PHF2</b>    | PHD finger protein 2 [Source:HGNC Symbol;Acc:8920]                                  |  |

|                |                                                                                        |   |
|----------------|----------------------------------------------------------------------------------------|---|
| <b>PHF20</b>   | PHD finger protein 20 [Source:HGNC Symbol;Acc:16098]                                   |   |
| <b>PHF20L1</b> | PHD finger protein 20-like 1 [Source:HGNC Symbol;Acc:24280]                            |   |
| <b>PHF21A</b>  | PHD finger protein 21A [Source:HGNC Symbol;Acc:24156]                                  |   |
| <b>PHF6</b>    | PHD finger protein 6                                                                   | √ |
| <b>PHF7</b>    | PHD finger protein 7 [Source:HGNC Symbol;Acc:18458]                                    |   |
| <b>PHF8</b>    | PHD finger protein 8 [Source:HGNC Symbol;Acc:20672]                                    |   |
| <b>PHIP</b>    | Pleckstrin homology domain interacting protein [Source:HGNC Symbol;Acc:15673]          |   |
| <b>PHKA2</b>   | Phosphorylase kinase, alpha 2 (liver) [Source:HGNC Symbol;Acc:8926]                    |   |
| <b>PHKG2</b>   | Phosphorylase kinase, gamma 2 (testis) [Source:HGNC Symbol;Acc:8931]                   |   |
| <b>PHLDA1</b>  | Pleckstrin homology-like domain, family A, member 1 [Source:HGNC Symbol;Acc:8933]      |   |
| <b>PHLDB1</b>  | Pleckstrin homology-like domain, family B, member 1 [Source:HGNC Symbol;Acc:23697]     |   |
| <b>PHLDB2</b>  | Pleckstrin homology-like domain, family B, member 2 [Source:HGNC Symbol;Acc:29573]     |   |
| <b>PHLPP1</b>  | PH domain and leucine rich repeat protein phosphatase 1 [Source:HGNC Symbol;Acc:20610] |   |
| <b>PHLPP2</b>  | PH domain and leucine rich repeat protein phosphatase 2 [Source:HGNC Symbol;Acc:29149] |   |
| <b>PHOX2B</b>  | Paired-like homeobox 2b                                                                | √ |
| <b>PHRF1</b>   | PHD and ring finger domains 1 [Source:HGNC Symbol;Acc:24351]                           |   |
| <b>PHTF2</b>   | Putative homeodomain transcription factor 2 [Source:HGNC Symbol;Acc:13411]             |   |
| <b>PHYHD1</b>  | Phytanoyl-coa dioxygenase domain containing 1 [Source:HGNC Symbol;Acc:23396]           |   |
| <b>PI15</b>    | Peptidase inhibitor 15 [Source:HGNC Symbol;Acc:8946]                                   |   |
| <b>PI4K2A</b>  | Phosphatidylinositol 4-kinase type 2 alpha [Source:HGNC Symbol;Acc:30031]              |   |
| <b>PI4K2B</b>  | Phosphatidylinositol 4-kinase type 2 beta [Source:HGNC Symbol;Acc:18215]               |   |
| <b>PI4KA</b>   | Phosphatidylinositol 4-kinase, catalytic, alpha [Source:HGNC Symbol;Acc:8983]          |   |

|                |                                                                                         |   |
|----------------|-----------------------------------------------------------------------------------------|---|
| <b>PI4KB</b>   | Phosphatidylinositol 4-kinase, catalytic, beta [Source:HGNC Symbol;Acc:8984]            |   |
| <b>PIGA</b>    | Phosphatidylinositol glycan anchor biosynthesis, class A [Source:HGNC Symbol;Acc:8957]  |   |
| <b>PIGC</b>    | Phosphatidylinositol glycan anchor biosynthesis, class C [Source:HGNC Symbol;Acc:8960]  |   |
| <b>PIGF</b>    | Phosphatidylinositol glycan anchor biosynthesis, class F [Source:HGNC Symbol;Acc:8962]  |   |
| <b>PIGL</b>    | Phosphatidylinositol glycan anchor biosynthesis, class L [Source:HGNC Symbol;Acc:8966]  |   |
| <b>PIGM</b>    | Phosphatidylinositol glycan anchor biosynthesis, class M [Source:HGNC Symbol;Acc:18858] |   |
| <b>PIGP</b>    | Phosphatidylinositol glycan anchor biosynthesis, class P [Source:HGNC Symbol;Acc:3046]  |   |
| <b>PIGQ</b>    | Phosphatidylinositol glycan anchor biosynthesis, class Q [Source:HGNC Symbol;Acc:14135] |   |
| <b>PIGZ</b>    | Phosphatidylinositol glycan anchor biosynthesis, class Z [Source:HGNC Symbol;Acc:30596] |   |
| <b>PIK3C2B</b> | Phosphoinositide-3-kinase, class 2, beta polypeptide [Source:HGNC Symbol;Acc:8972]      |   |
| <b>PIK3CA</b>  | Phosphoinositide-3-kinase, catalytic, alpha polypeptide                                 | √ |
| <b>PIK3CG</b>  | Phosphoinositide-3-kinase, catalytic, gamma polypeptide [Source:HGNC Symbol;Acc:8978]   |   |
| <b>PIK3IP1</b> | Phosphoinositide-3-kinase interacting protein 1 [Source:HGNC Symbol;Acc:24942]          |   |
| <b>PIK3R1</b>  | Phosphoinositide-3-kinase, regulatory subunit 1 (alpha)                                 | √ |
| <b>PIK3R3</b>  | Phosphoinositide-3-kinase, regulatory subunit 3 (gamma) [Source:HGNC Symbol;Acc:8981]   |   |
| <b>PIK3R4</b>  | Phosphoinositide-3-kinase, regulatory subunit 4 [Source:HGNC Symbol;Acc:8982]           |   |
| <b>PIKFYVE</b> | Phosphoinositide kinase, FYVE finger containing [Source:HGNC Symbol;Acc:23785]          |   |



|                |                                                                                                                                         |  |
|----------------|-----------------------------------------------------------------------------------------------------------------------------------------|--|
| <b>PINX1</b>   | PIN2/TERF1 interacting, telomerase inhibitor 1 [Source:HGNC Symbol;Acc:30046]                                                           |  |
| <b>PION</b>    | Pigeon homolog (Drosophila) [Source:HGNC Symbol;Acc:28042]                                                                              |  |
| <b>PIP4K2A</b> | Phosphatidylinositol-5-phosphate 4-kinase, type II, alpha [Source:HGNC Symbol;Acc:8997]                                                 |  |
| <b>PIP5K1C</b> | Phosphatidylinositol-4-phosphate 5-kinase, type I, gamma [Source:HGNC Symbol;Acc:8996]                                                  |  |
| <b>PITPNB</b>  | Phosphatidylinositol transfer protein, beta [Source:HGNC Symbol;Acc:9002]                                                               |  |
| <b>PITPNM1</b> | Phosphatidylinositol transfer protein, membrane-associated 1 [Source:HGNC Symbol;Acc:9003]                                              |  |
| <b>PITPNM2</b> | Phosphatidylinositol transfer protein, membrane-associated 2 [Source:HGNC Symbol;Acc:21044]                                             |  |
| <b>PITRM1</b>  | Pitriylsin metallopeptidase 1 [Source:HGNC Symbol;Acc:17663]                                                                            |  |
| <b>PIWIL2</b>  | Piwi-like 2 (Drosophila) [Source:HGNC Symbol;Acc:17644]                                                                                 |  |
| <b>PIWIL3</b>  | Piwi-like 3 (Drosophila) [Source:HGNC Symbol;Acc:18443]                                                                                 |  |
| <b>PIWIL4</b>  | Piwi-like 4 (Drosophila) [Source:HGNC Symbol;Acc:18444]                                                                                 |  |
| <b>PKD1</b>    | Polycystic kidney disease 1 (autosomal dominant) [Source:HGNC Symbol;Acc:9008]                                                          |  |
| <b>PKD1L2</b>  | Polycystic kidney disease 1-like 2 [Source:HGNC Symbol;Acc:21715]                                                                       |  |
| <b>PKD2</b>    | Polycystic kidney disease 2 (autosomal dominant) [Source:HGNC Symbol;Acc:9009]                                                          |  |
| <b>PKDREJ</b>  | Polycystic kidney disease (polycystin) and REJ homolog (sperm receptor for egg jelly homolog, sea urchin) [Source:HGNC Symbol;Acc:9015] |  |
| <b>PKHD1</b>   | Polycystic kidney and hepatic disease 1 (autosomal recessive) [Source:HGNC Symbol;Acc:9016]                                             |  |
| <b>PKHD1L1</b> | Polycystic kidney and hepatic disease 1 (autosomal recessive)-like 1 [Source:HGNC Symbol;Acc:20313]                                     |  |
| <b>PKLR</b>    | Pyruvate kinase, liver and RBC [Source:HGNC Symbol;Acc:9020]                                                                            |  |
| <b>PKN1</b>    | Protein kinase N1 [Source:HGNC Symbol;Acc:9405]                                                                                         |  |
| <b>PKNOX2</b>  | PBX/knotted 1 homeobox 2 [Source:HGNC Symbol;Acc:16714]                                                                                 |  |
| <b>PLA2G15</b> | Phospholipase A2, group XV [Source:HGNC Symbol;Acc:17163]                                                                               |  |
| <b>PLA2G16</b> | Phospholipase A2, group XVI [Source:HGNC Symbol;Acc:17825]                                                                              |  |

|                |                                                                                                                             |   |
|----------------|-----------------------------------------------------------------------------------------------------------------------------|---|
| <b>PLA2G2C</b> | Phospholipase A2, group IIC [Source:HGNC Symbol;Acc:9032]                                                                   |   |
| <b>PLA2G4A</b> | Phospholipase A2, group IVA (cytosolic, calcium-dependent) [Source:HGNC Symbol;Acc:9035]                                    |   |
| <b>PLA2G4B</b> | Phospholipase A2, group IVB (cytosolic) [Source:HGNC Symbol;Acc:9036]                                                       |   |
| <b>PLA2G4D</b> | Phospholipase A2, group IVD (cytosolic) [Source:HGNC Symbol;Acc:30038]                                                      |   |
| <b>PLA2G4F</b> | Phospholipase A2, group IVF [Source:HGNC Symbol;Acc:27396]                                                                  |   |
| <b>PLA2G6</b>  | Phospholipase A2, group VI (cytosolic, calcium-independent) [Source:HGNC Symbol;Acc:9039]                                   |   |
| <b>PLA2R1</b>  | Phospholipase A2 receptor 1, 180kda [Source:HGNC Symbol;Acc:9042]                                                           |   |
| <b>PLAA</b>    | Phospholipase A2-activating protein [Source:HGNC Symbol;Acc:9043]                                                           |   |
| <b>PLAG1</b>   | Pleiomorphic adenoma gene 1                                                                                                 | √ |
| <b>PLAGL1</b>  | Pleiomorphic adenoma gene-like 1 [Source:HGNC Symbol;Acc:9046]                                                              |   |
| <b>PLAU</b>    | Plasminogen activator, urokinase [Source:HGNC Symbol;Acc:9052]                                                              |   |
| <b>PLB1</b>    | Phospholipase B1 [Source:HGNC Symbol;Acc:30041]                                                                             |   |
| <b>PLBD2</b>   | Phospholipase B domain containing 2 [Source:HGNC Symbol;Acc:27283]                                                          |   |
| <b>PLCB1</b>   | Phospholipase C, beta 1 (phosphoinositide-specific) [Source:HGNC Symbol;Acc:15917]                                          |   |
| <b>PLCB3</b>   | Phospholipase C, beta 3 (phosphatidylinositol-specific) [Source:HGNC Symbol;Acc:9056]                                       |   |
| <b>PLCG1</b>   | Phospholipase C, gamma 1 [Source:HGNC Symbol;Acc:9065]                                                                      |   |
| <b>PLCG2</b>   | Phospholipase C, gamma 2 (phosphatidylinositol-specific) [Source:HGNC Symbol;Acc:9066]                                      |   |
| <b>PLCH1</b>   | Phospholipase C, eta 1 [Source:HGNC Symbol;Acc:29185]                                                                       |   |
| <b>PLCL1</b>   | Phospholipase C-like 1 [Source:HGNC Symbol;Acc:9063]                                                                        |   |
| <b>PLCXD1</b>  | Phosphatidylinositol-specific phospholipase C, X domain containing 1 [Source:HGNC Symbol;Acc:23148]                         |   |
| <b>PLD5</b>    | Phospholipase D family, member 5 [Source:HGNC Symbol;Acc:26879]                                                             |   |
| <b>PLEC</b>    | Plectin [Source:HGNC Symbol;Acc:9069]                                                                                       |   |
| <b>PLEK2</b>   | Pleckstrin 2 [Source:HGNC Symbol;Acc:19238]                                                                                 |   |
| <b>PLEKHA1</b> | Pleckstrin homology domain containing, family A (phosphoinositide binding specific) member 1 [Source:HGNC Symbol;Acc:14335] |   |

|                 |                                                                                                                             |  |
|-----------------|-----------------------------------------------------------------------------------------------------------------------------|--|
| <b>PLEKHA3</b>  | Pleckstrin homology domain containing, family A (phosphoinositide binding specific) member 3 [Source:HGNC Symbol;Acc:14338] |  |
| <b>PLEKHA7</b>  | Pleckstrin homology domain containing, family A member 7 [Source:HGNC Symbol;Acc:27049]                                     |  |
| <b>PLEKHB2</b>  | Pleckstrin homology domain containing, family B (evectins) member 2 [Source:HGNC Symbol;Acc:19236]                          |  |
| <b>PLEKHG2</b>  | Pleckstrin homology domain containing, family G (with rhogef domain) member 2 [Source:HGNC Symbol;Acc:29515]                |  |
| <b>PLEKHG4</b>  | Pleckstrin homology domain containing, family G (with rhogef domain) member 4 [Source:HGNC Symbol;Acc:24501]                |  |
| <b>PLEKHG4B</b> | Pleckstrin homology domain containing, family G (with rhogef domain) member 4B [Source:HGNC Symbol;Acc:29399]               |  |
| <b>PLEKHM1</b>  | Pleckstrin homology domain containing, family M (with RUN domain) member 1 [Source:HGNC Symbol;Acc:29017]                   |  |
| <b>PLEKHM3</b>  | Pleckstrin homology domain containing, family M, member 3 [Source:HGNC Symbol;Acc:34006]                                    |  |
| <b>PLEKHO2</b>  | Pleckstrin homology domain containing, family O member 2 [Source:HGNC Symbol;Acc:30026]                                     |  |
| <b>PLG</b>      | Plasminogen [Source:HGNC Symbol;Acc:9071]                                                                                   |  |
| <b>PLIN1</b>    | Perilipin 1 [Source:HGNC Symbol;Acc:9076]                                                                                   |  |
| <b>PLIN3</b>    | Perilipin 3 [Source:HGNC Symbol;Acc:16893]                                                                                  |  |
| <b>PLIN4</b>    | Perilipin 4 [Source:HGNC Symbol;Acc:29393]                                                                                  |  |
| <b>PLIN5</b>    | Perilipin 5 [Source:HGNC Symbol;Acc:33196]                                                                                  |  |
| <b>PLK4</b>     | Polo-like kinase 4 [Source:HGNC Symbol;Acc:11397]                                                                           |  |
| <b>PLOD2</b>    | Procollagen-lysine, 2-oxoglutarate 5-dioxygenase 2 [Source:HGNC Symbol;Acc:9082]                                            |  |
| <b>PLS3</b>     | Plastin 3 [Source:HGNC Symbol;Acc:9091]                                                                                     |  |
| <b>PLSCR1</b>   | Phospholipid scramblase 1 [Source:HGNC Symbol;Acc:9092]                                                                     |  |
| <b>PLVAP</b>    | Plasmalemma vesicle associated protein [Source:HGNC Symbol;Acc:13635]                                                       |  |
| <b>PLXDC2</b>   | Plexin domain containing 2 [Source:HGNC Symbol;Acc:21013]                                                                   |  |
| <b>PLXNA2</b>   | Plexin A2 [Source:HGNC Symbol;Acc:9100]                                                                                     |  |
| <b>PLXNA3</b>   | Plexin A3 [Source:HGNC Symbol;Acc:9101]                                                                                     |  |
| <b>PLXNA4</b>   | Plexin A4 [Source:HGNC Symbol;Acc:9102]                                                                                     |  |

|                 |                                                                                              |   |
|-----------------|----------------------------------------------------------------------------------------------|---|
| <b>PLXNB1</b>   | Plexin B1 [Source:HGNC Symbol;Acc:9103]                                                      |   |
| <b>PLXNB2</b>   | Plexin B2 [Source:HGNC Symbol;Acc:9104]                                                      |   |
| <b>PLXNC1</b>   | Plexin C1 [Source:HGNC Symbol;Acc:9106]                                                      |   |
| <b>PLXND1</b>   | Plexin D1 [Source:HGNC Symbol;Acc:9107]                                                      |   |
| <b>PM20D2</b>   | Peptidase M20 domain containing 2 [Source:HGNC Symbol;Acc:21408]                             |   |
| <b>PMFBP1</b>   | Polyamine modulated factor 1 binding protein 1 [Source:HGNC Symbol;Acc:17728]                |   |
| <b>PML</b>      | Promyelocytic leukemia                                                                       | √ |
| <b>PMM1</b>     | Phosphomannomutase 1 [Source:HGNC Symbol;Acc:9114]                                           |   |
| <b>PMM2</b>     | Phosphomannomutase 2 [Source:HGNC Symbol;Acc:9115]                                           |   |
| <b>PMPCB</b>    | Peptidase (mitochondrial processing) beta [Source:HGNC Symbol;Acc:9119]                      |   |
| <b>PNLDC1</b>   | Poly(A)-specific ribonuclease (PARN)-like domain containing 1 [Source:HGNC Symbol;Acc:21185] |   |
| <b>PNLIPRP3</b> | Pancreatic lipase-related protein 3 [Source:HGNC Symbol;Acc:23492]                           |   |
| <b>PNMA3</b>    | Paraneoplastic antigen MA3 [Source:HGNC Symbol;Acc:18742]                                    |   |
| <b>PNMA5</b>    | Paraneoplastic antigen like 5 [Source:HGNC Symbol;Acc:18743]                                 |   |
| <b>PNN</b>      | Pinin, desmosome associated protein [Source:HGNC Symbol;Acc:9162]                            |   |
| <b>PNO1</b>     | Partner of NOB1 homolog (S. Cerevisiae) [Source:HGNC Symbol;Acc:32790]                       |   |
| <b>PNPLA1</b>   | Patatin-like phospholipase domain containing 1 [Source:HGNC Symbol;Acc:21246]                |   |
| <b>PNPLA2</b>   | Patatin-like phospholipase domain containing 2 [Source:HGNC Symbol;Acc:30802]                |   |
| <b>PNPLA3</b>   | Patatin-like phospholipase domain containing 3 [Source:HGNC Symbol;Acc:18590]                |   |
| <b>PNPLA6</b>   | Patatin-like phospholipase domain containing 6 [Source:HGNC Symbol;Acc:16268]                |   |
| <b>PNRC1</b>    | Proline-rich nuclear receptor coactivator 1 [Source:HGNC Symbol;Acc:17278]                   |   |
| <b>POC1A</b>    | POC1 centriolar protein homolog A (Chlamydomonas) [Source:HGNC Symbol;Acc:24488]             |   |

|                |                                                                                          |  |
|----------------|------------------------------------------------------------------------------------------|--|
| <b>POC1B</b>   | POC1 centriolar protein homolog B (Chlamydomonas) [Source:HGNC Symbol;Acc:30836]         |  |
| <b>PODNL1</b>  | Podocan-like 1 [Source:HGNC Symbol;Acc:26275]                                            |  |
| <b>POFUT2</b>  | Protein O-fucosyltransferase 2 [Source:HGNC Symbol;Acc:14683]                            |  |
| <b>POGK</b>    | Pogo transposable element with KRAB domain [Source:HGNC Symbol;Acc:18800]                |  |
| <b>POGLUT1</b> | Protein O-glucosyltransferase 1 [Source:HGNC Symbol;Acc:22954]                           |  |
| <b>POGZ</b>    | Pogo transposable element with ZNF domain [Source:HGNC Symbol;Acc:18801]                 |  |
| <b>POLB</b>    | Polymerase (DNA directed), beta [Source:HGNC Symbol;Acc:9174]                            |  |
| <b>POLG</b>    | Polymerase (DNA directed), gamma [Source:HGNC Symbol;Acc:9179]                           |  |
| <b>POLH</b>    | Polymerase (DNA directed), eta [Source:HGNC Symbol;Acc:9181]                             |  |
| <b>POLK</b>    | Polymerase (DNA directed) kappa [Source:HGNC Symbol;Acc:9183]                            |  |
| <b>POLL</b>    | Polymerase (DNA directed), lambda [Source:HGNC Symbol;Acc:9184]                          |  |
| <b>POLN</b>    | Polymerase (DNA directed) nu [Source:HGNC Symbol;Acc:18870]                              |  |
| <b>POLR1B</b>  | Polymerase (RNA) I polypeptide B, 128kda [Source:HGNC Symbol;Acc:20454]                  |  |
| <b>POLR2B</b>  | Polymerase (RNA) II (DNA directed) polypeptide B, 140kda [Source:HGNC Symbol;Acc:9188]   |  |
| <b>POLR2C</b>  | Polymerase (RNA) II (DNA directed) polypeptide C, 33kda [Source:HGNC Symbol;Acc:9189]    |  |
| <b>POLR2D</b>  | Polymerase (RNA) II (DNA directed) polypeptide D [Source:HGNC Symbol;Acc:9191]           |  |
| <b>POLR2E</b>  | Polymerase (RNA) II (DNA directed) polypeptide E, 25kda [Source:HGNC Symbol;Acc:9192]    |  |
| <b>POLR2F</b>  | Polymerase (RNA) II (DNA directed) polypeptide F [Source:HGNC Symbol;Acc:9193]           |  |
| <b>POLR3C</b>  | Polymerase (RNA) III (DNA directed) polypeptide C (62kd) [Source:HGNC Symbol;Acc:30076]  |  |
| <b>POLR3D</b>  | Polymerase (RNA) III (DNA directed) polypeptide D, 44kda [Source:HGNC Symbol;Acc:1080]   |  |
| <b>POLR3F</b>  | Polymerase (RNA) III (DNA directed) polypeptide F, 39 kda [Source:HGNC Symbol;Acc:15763] |  |

|                 |                                                                                                                                         |   |
|-----------------|-----------------------------------------------------------------------------------------------------------------------------------------|---|
| <b>POLRMT</b>   | Polymerase (RNA) mitochondrial (DNA directed) [Source:HGNC Symbol;Acc:9200]                                                             |   |
| <b>POM121C</b>  | POM121 membrane glycoprotein C [Source:HGNC Symbol;Acc:34005]                                                                           |   |
| <b>POM121L2</b> | POM121 membrane glycoprotein-like 2 [Source:HGNC Symbol;Acc:13973]                                                                      |   |
| <b>POMT1</b>    | Protein-O-mannosyltransferase 1 [Source:HGNC Symbol;Acc:9202]                                                                           |   |
| <b>POMT2</b>    | Protein-O-mannosyltransferase 2 [Source:HGNC Symbol;Acc:19743]                                                                          |   |
| <b>PON2</b>     | Paraoxonase 2 [Source:HGNC Symbol;Acc:9205]                                                                                             |   |
| <b>POP5</b>     | Processing of precursor 5, ribonuclease P/MRP subunit (S. Cerevisiae) [Source:HGNC Symbol;Acc:17689]                                    |   |
| <b>POPDC2</b>   | Popeye domain containing 2 [Source:HGNC Symbol;Acc:17648]                                                                               |   |
| <b>POU2AF1</b>  | POU class 2 associating factor 1                                                                                                        | √ |
| <b>POU2F1</b>   | POU class 2 homeobox 1 [Source:HGNC Symbol;Acc:9212]                                                                                    |   |
| <b>POU3F2</b>   | POU class 3 homeobox 2 [Source:HGNC Symbol;Acc:9215]                                                                                    |   |
| <b>POU4F3</b>   | POU class 4 homeobox 3 [Source:HGNC Symbol;Acc:9220]                                                                                    |   |
| <b>POU6F1</b>   | POU class 6 homeobox 1 [Source:HGNC Symbol;Acc:9224]                                                                                    |   |
| <b>POU6F2</b>   | POU class 6 homeobox 2 [Source:HGNC Symbol;Acc:21694]                                                                                   |   |
| <b>PPAP2B</b>   | Phosphatidic acid phosphatase type 2B [Source:HGNC Symbol;Acc:9229]                                                                     |   |
| <b>PPARA</b>    | Peroxisome proliferator-activated receptor alpha [Source:HGNC Symbol;Acc:9232]                                                          |   |
| <b>PPARD</b>    | Peroxisome proliferator-activated receptor delta [Source:HGNC Symbol;Acc:9235]                                                          |   |
| <b>PPARG</b>    | Peroxisome proliferator-activated receptor gamma                                                                                        | √ |
| <b>PPARGC1A</b> | Peroxisome proliferator-activated receptor gamma, coactivator 1 alpha [Source:HGNC Symbol;Acc:9237]                                     |   |
| <b>PPARGC1B</b> | Peroxisome proliferator-activated receptor gamma, coactivator 1 beta [Source:HGNC Symbol;Acc:30022]                                     |   |
| <b>PPCDC</b>    | Phosphopantothencysteine decarboxylase [Source:HGNC Symbol;Acc:28107]                                                                   |   |
| <b>PPFIA2</b>   | Protein tyrosine phosphatase, receptor type, f polypeptide (PTPRF), interacting protein (liprin), alpha 2 [Source:HGNC Symbol;Acc:9246] |   |
| <b>PPFIA3</b>   | Protein tyrosine phosphatase, receptor type, f polypeptide (PTPRF), interacting protein (liprin), alpha 3 [Source:HGNC Symbol;Acc:9247] |   |

|                 |                                                                                                      |  |
|-----------------|------------------------------------------------------------------------------------------------------|--|
| <b>PPFIBP2</b>  | PTPRF interacting protein, binding protein 2 (liprin beta 2) [Source:HGNC Symbol;Acc:9250]           |  |
| <b>PPIA</b>     | Peptidylprolyl isomerase A (cyclophilin A) [Source:HGNC Symbol;Acc:9253]                             |  |
| <b>PPIG</b>     | Peptidylprolyl isomerase G (cyclophilin G) [Source:HGNC Symbol;Acc:14650]                            |  |
| <b>PPIH</b>     | Peptidylprolyl isomerase H (cyclophilin H) [Source:HGNC Symbol;Acc:14651]                            |  |
| <b>PPIL2</b>    | Peptidylprolyl isomerase (cyclophilin)-like 2 [Source:HGNC Symbol;Acc:9261]                          |  |
| <b>PPIP5K2</b>  | Diphosphoinositol pentakisphosphate kinase 2 [Source:HGNC Symbol;Acc:29035]                          |  |
| <b>PPL</b>      | Periplakin [Source:HGNC Symbol;Acc:9273]                                                             |  |
| <b>PPM1B</b>    | Protein phosphatase, Mg <sup>2+</sup> /Mn <sup>2+</sup> dependent, 1B [Source:HGNC Symbol;Acc:9276]  |  |
| <b>PPM1E</b>    | Protein phosphatase, Mg <sup>2+</sup> /Mn <sup>2+</sup> dependent, 1E [Source:HGNC Symbol;Acc:19322] |  |
| <b>PPM1F</b>    | Protein phosphatase, Mg <sup>2+</sup> /Mn <sup>2+</sup> dependent, 1F [Source:HGNC Symbol;Acc:19388] |  |
| <b>PPM1J</b>    | Protein phosphatase, Mg <sup>2+</sup> /Mn <sup>2+</sup> dependent, 1J [Source:HGNC Symbol;Acc:20785] |  |
| <b>PPM1L</b>    | Protein phosphatase, Mg <sup>2+</sup> /Mn <sup>2+</sup> dependent, 1L [Source:HGNC Symbol;Acc:16381] |  |
| <b>PPM1M</b>    | Protein phosphatase, Mg <sup>2+</sup> /Mn <sup>2+</sup> dependent, 1M [Source:HGNC Symbol;Acc:26506] |  |
| <b>PPOX</b>     | Protoporphyrinogen oxidase [Source:HGNC Symbol;Acc:9280]                                             |  |
| <b>PPP1R11</b>  | Protein phosphatase 1, regulatory (inhibitor) subunit 11 [Source:HGNC Symbol;Acc:9285]               |  |
| <b>PPP1R12A</b> | Protein phosphatase 1, regulatory (inhibitor) subunit 12A [Source:HGNC Symbol;Acc:7618]              |  |
| <b>PPP1R12C</b> | Protein phosphatase 1, regulatory (inhibitor) subunit 12C [Source:HGNC Symbol;Acc:14947]             |  |

|                 |                                                                                          |  |
|-----------------|------------------------------------------------------------------------------------------|--|
| <b>PPP1R13B</b> | Protein phosphatase 1, regulatory (inhibitor) subunit 13B [Source:HGNC Symbol;Acc:14950] |  |
| <b>PPP1R14C</b> | Protein phosphatase 1, regulatory (inhibitor) subunit 14C [Source:HGNC Symbol;Acc:14952] |  |
| <b>PPP1R15A</b> | Protein phosphatase 1, regulatory (inhibitor) subunit 15A [Source:HGNC Symbol;Acc:14375] |  |
| <b>PPP1R15B</b> | Protein phosphatase 1, regulatory (inhibitor) subunit 15B [Source:HGNC Symbol;Acc:14951] |  |
| <b>PPP1R16B</b> | Protein phosphatase 1, regulatory (inhibitor) subunit 16B [Source:HGNC Symbol;Acc:15850] |  |
| <b>PPP1R1C</b>  | Protein phosphatase 1, regulatory (inhibitor) subunit 1C [Source:HGNC Symbol;Acc:14940]  |  |
| <b>PPP1R2</b>   | Protein phosphatase 1, regulatory (inhibitor) subunit 2 [Source:HGNC Symbol;Acc:9288]    |  |
| <b>PPP1R3A</b>  | Protein phosphatase 1, regulatory (inhibitor) subunit 3A [Source:HGNC Symbol;Acc:9291]   |  |
| <b>PPP1R3B</b>  | Protein phosphatase 1, regulatory (inhibitor) subunit 3B [Source:HGNC Symbol;Acc:14942]  |  |
| <b>PPP1R3F</b>  | Protein phosphatase 1, regulatory (inhibitor) subunit 3F [Source:HGNC Symbol;Acc:14944]  |  |
| <b>PPP1R9A</b>  | Protein phosphatase 1, regulatory (inhibitor) subunit 9A [Source:HGNC Symbol;Acc:14946]  |  |
| <b>PPP2CA</b>   | Protein phosphatase 2, catalytic subunit, alpha isozyme [Source:HGNC Symbol;Acc:9299]    |  |
| <b>PPP2R1B</b>  | Protein phosphatase 2, regulatory subunit A, beta [Source:HGNC Symbol;Acc:9303]          |  |
| <b>PPP2R2A</b>  | Protein phosphatase 2, regulatory subunit B, alpha [Source:HGNC Symbol;Acc:9304]         |  |
| <b>PPP2R2D</b>  | Protein phosphatase 2, regulatory subunit B, delta [Source:HGNC Symbol;Acc:23732]        |  |
| <b>PPP2R3A</b>  | Protein phosphatase 2, regulatory subunit B", alpha [Source:HGNC Symbol;Acc:9307]        |  |



|                 |                                                                                       |  |
|-----------------|---------------------------------------------------------------------------------------|--|
| <b>PPP2R3B</b>  | Protein phosphatase 2, regulatory subunit B", beta [Source:HGNC Symbol;Acc:13417]     |  |
| <b>PPP2R4</b>   | Protein phosphatase 2A activator, regulatory subunit 4 [Source:HGNC Symbol;Acc:9308]  |  |
| <b>PPP2R5C</b>  | Protein phosphatase 2, regulatory subunit B', gamma [Source:HGNC Symbol;Acc:9311]     |  |
| <b>PPP3CA</b>   | Protein phosphatase 3, catalytic subunit, alpha isozyme [Source:HGNC Symbol;Acc:9314] |  |
| <b>PPP3CB</b>   | Protein phosphatase 3, catalytic subunit, beta isozyme [Source:HGNC Symbol;Acc:9315]  |  |
| <b>PPP3R1</b>   | Protein phosphatase 3, regulatory subunit B, alpha [Source:HGNC Symbol;Acc:9317]      |  |
| <b>PPP4R2</b>   | Protein phosphatase 4, regulatory subunit 2 [Source:HGNC Symbol;Acc:18296]            |  |
| <b>PPP6C</b>    | Protein phosphatase 6, catalytic subunit [Source:HGNC Symbol;Acc:9323]                |  |
| <b>PPP6R2</b>   | Protein phosphatase 6, regulatory subunit 2 [Source:HGNC Symbol;Acc:19253]            |  |
| <b>PPT1</b>     | Palmitoyl-protein thioesterase 1 [Source:HGNC Symbol;Acc:9325]                        |  |
| <b>PQLC1</b>    | PQ loop repeat containing 1 [Source:HGNC Symbol;Acc:26188]                            |  |
| <b>PQLC2</b>    | PQ loop repeat containing 2 [Source:HGNC Symbol;Acc:26001]                            |  |
| <b>PRAME</b>    | Preferentially expressed antigen in melanoma [Source:HGNC Symbol;Acc:9336]            |  |
| <b>PRAMEF1</b>  | PRAME family member 1 [Source:HGNC Symbol;Acc:28840]                                  |  |
| <b>PRAMEF10</b> | PRAME family member 10 [Source:HGNC Symbol;Acc:27997]                                 |  |
| <b>PRAMEF13</b> | PRAME family member 13 [Source:HGNC Symbol;Acc:13262]                                 |  |
| <b>PRAMEF14</b> | PRAME family member 14 [Source:HGNC Symbol;Acc:13576]                                 |  |
| <b>PRAMEF16</b> | PRAME family member 16 [Source:HGNC Symbol;Acc:25767]                                 |  |
| <b>PRAMEF17</b> | PRAME family member 17 [Source:HGNC Symbol;Acc:29485]                                 |  |
| <b>PRAMEF18</b> | PRAME family member 18 [Source:HGNC Symbol;Acc:30693]                                 |  |
| <b>PRAMEF19</b> | PRAME family member 19 [Source:HGNC Symbol;Acc:24908]                                 |  |
| <b>PRAMEF2</b>  | PRAME family member 2 [Source:HGNC Symbol;Acc:28841]                                  |  |
| <b>PRAMEF22</b> | PRAME family member 22 [Source:HGNC Symbol;Acc:34393]                                 |  |
| <b>PRAMEF3</b>  | PRAME family member 3 [Source:HGNC Symbol;Acc:14087]                                  |  |

|                 |                                                                                                         |   |
|-----------------|---------------------------------------------------------------------------------------------------------|---|
| <b>PRC1</b>     | Protein regulator of cytokinesis 1 [Source:HGNC Symbol;Acc:9341]                                        |   |
| <b>PRCD</b>     | Progressive rod-cone degeneration [Source:HGNC Symbol;Acc:32528]                                        |   |
| <b>PRDM1</b>    | PR domain containing 1, with ZNF domain                                                                 | √ |
| <b>PRDM10</b>   | PR domain containing 10 [Source:HGNC Symbol;Acc:13995]                                                  |   |
| <b>PRDM12</b>   | PR domain containing 12 [Source:HGNC Symbol;Acc:13997]                                                  |   |
| <b>PRDM15</b>   | PR domain containing 15 [Source:HGNC Symbol;Acc:13999]                                                  |   |
| <b>PRDM16</b>   | PR domain containing 16                                                                                 | √ |
| <b>PRDM5</b>    | PR domain containing 5 [Source:HGNC Symbol;Acc:9349]                                                    |   |
| <b>PRDM7</b>    | PR domain containing 7 [Source:HGNC Symbol;Acc:9351]                                                    |   |
| <b>PRDX2</b>    | Peroxiredoxin 2 [Source:HGNC Symbol;Acc:9353]                                                           |   |
| <b>PRDX3</b>    | Peroxiredoxin 3 [Source:HGNC Symbol;Acc:9354]                                                           |   |
| <b>PRDX5</b>    | Peroxiredoxin 5 [Source:HGNC Symbol;Acc:9355]                                                           |   |
| <b>PREB</b>     | Prolactin regulatory element binding [Source:HGNC Symbol;Acc:9356]                                      |   |
| <b>PRELID2</b>  | PRELI domain containing 2 [Source:HGNC Symbol;Acc:28306]                                                |   |
| <b>PREP</b>     | Prolyl endopeptidase [Source:HGNC Symbol;Acc:9358]                                                      |   |
| <b>PREPL</b>    | Prolyl endopeptidase-like [Source:HGNC Symbol;Acc:30228]                                                |   |
| <b>PREX1</b>    | Phosphatidylinositol-3,4,5-trisphosphate-dependent Rac exchange factor 1 [Source:HGNC Symbol;Acc:32594] |   |
| <b>PREX2</b>    | Phosphatidylinositol-3,4,5-trisphosphate-dependent Rac exchange factor 2 [Source:HGNC Symbol;Acc:22950] |   |
| <b>PRICKLE1</b> | Prickle homolog 1 (Drosophila) [Source:HGNC Symbol;Acc:17019]                                           |   |
| <b>PRICKLE2</b> | Prickle homolog 2 (Drosophila) [Source:HGNC Symbol;Acc:20340]                                           |   |
| <b>PRICKLE3</b> | Prickle homolog 3 (Drosophila) [Source:HGNC Symbol;Acc:6645]                                            |   |
| <b>PRICKLE4</b> | Prickle homolog 4 (Drosophila) [Source:HGNC Symbol;Acc:16805]                                           |   |
| <b>PRIMA1</b>   | Proline rich membrane anchor 1 [Source:HGNC Symbol;Acc:18319]                                           |   |
| <b>PRKAA2</b>   | Protein kinase, AMP-activated, alpha 2 catalytic subunit [Source:HGNC Symbol;Acc:9377]                  |   |
| <b>PRKAG1</b>   | Protein kinase, AMP-activated, gamma 1 non-catalytic subunit [Source:HGNC Symbol;Acc:9385]              |   |
| <b>PRKAG2</b>   | Protein kinase, AMP-activated, gamma 2 non-catalytic subunit [Source:HGNC Symbol;Acc:9386]              |   |
| <b>PRKCA</b>    | Protein kinase C, alpha [Source:HGNC Symbol;Acc:9393]                                                   |   |
| <b>PRKCB</b>    | Protein kinase C, beta [Source:HGNC Symbol;Acc:9395]                                                    |   |

|                |                                                                                                       |  |
|----------------|-------------------------------------------------------------------------------------------------------|--|
| <b>PRKCD</b>   | Protein kinase C, delta [Source:HGNC Symbol;Acc:9399]                                                 |  |
| <b>PRKCE</b>   | Protein kinase C, epsilon [Source:HGNC Symbol;Acc:9401]                                               |  |
| <b>PRKCH</b>   | Protein kinase C, eta [Source:HGNC Symbol;Acc:9403]                                                   |  |
| <b>PRKD2</b>   | Protein kinase D2 [Source:HGNC Symbol;Acc:17293]                                                      |  |
| <b>PRKD3</b>   | Protein kinase D3 [Source:HGNC Symbol;Acc:9408]                                                       |  |
| <b>PRKDC</b>   | Protein kinase, DNA-activated, catalytic polypeptide [Source:HGNC Symbol;Acc:9413]                    |  |
| <b>PRKG1</b>   | Protein kinase, cgmp-dependent, type I [Source:HGNC Symbol;Acc:9414]                                  |  |
| <b>PRKRIP1</b> | PRKR interacting protein 1 (IL11 inducible) [Source:HGNC Symbol;Acc:21894]                            |  |
| <b>PRLR</b>    | Prolactin receptor [Source:HGNC Symbol;Acc:9446]                                                      |  |
| <b>PRMT1</b>   | Protein arginine methyltransferase 1 [Source:HGNC Symbol;Acc:5187]                                    |  |
| <b>PRMT5</b>   | Protein arginine methyltransferase 5 [Source:HGNC Symbol;Acc:10894]                                   |  |
| <b>PRMT6</b>   | Protein arginine methyltransferase 6 [Source:HGNC Symbol;Acc:18241]                                   |  |
| <b>PRMT7</b>   | Protein arginine methyltransferase 7 [Source:HGNC Symbol;Acc:25557]                                   |  |
| <b>PRMT8</b>   | Protein arginine methyltransferase 8 [Source:HGNC Symbol;Acc:5188]                                    |  |
| <b>PRND</b>    | Prion protein 2 (dublet) [Source:HGNC Symbol;Acc:15748]                                               |  |
| <b>PRNP</b>    | Prion protein [Source:HGNC Symbol;Acc:9449]                                                           |  |
| <b>PRNT</b>    | Prion protein (testis specific) [Source:HGNC Symbol;Acc:18046]                                        |  |
| <b>PROCR</b>   | Protein C receptor, endothelial [Source:HGNC Symbol;Acc:9452]                                         |  |
| <b>PRODH</b>   | Proline dehydrogenase (oxidase) 1 [Source:HGNC Symbol;Acc:9453]                                       |  |
| <b>PROM1</b>   | Prominin 1 [Source:HGNC Symbol;Acc:9454]                                                              |  |
| <b>PROM2</b>   | Prominin 2 [Source:HGNC Symbol;Acc:20685]                                                             |  |
| <b>PROX2</b>   | Prospero homeobox 2 [Source:HGNC Symbol;Acc:26715]                                                    |  |
| <b>PROZ</b>    | Protein Z, vitamin K-dependent plasma glycoprotein [Source:HGNC Symbol;Acc:9460]                      |  |
| <b>PRPF4</b>   | PRP4 pre-mrna processing factor 4 homolog (yeast) [Source:HGNC Symbol;Acc:17349]                      |  |
| <b>PRPF40A</b> | PRP40 pre-mrna processing factor 40 homolog A ( <i>S. Cerevisiae</i> ) [Source:HGNC Symbol;Acc:16463] |  |
| <b>PRPF4B</b>  | PRP4 pre-mrna processing factor 4 homolog B (yeast) [Source:HGNC Symbol;Acc:17346]                    |  |

|                |                                                                                                   |  |
|----------------|---------------------------------------------------------------------------------------------------|--|
| <b>PRPF6</b>   | PRP6 pre-mrna processing factor 6 homolog ( <i>S. Cerevisiae</i> ) [Source:HGNC Symbol;Acc:15860] |  |
| <b>PRPF8</b>   | PRP8 pre-mrna processing factor 8 homolog ( <i>S. Cerevisiae</i> ) [Source:HGNC Symbol;Acc:17340] |  |
| <b>PRPH2</b>   | Peripherin 2 (retinal degeneration, slow) [Source:HGNC Symbol;Acc:9942]                           |  |
| <b>PRPS1</b>   | Phosphoribosyl pyrophosphate synthetase 1 [Source:HGNC Symbol;Acc:9462]                           |  |
| <b>PRPS2</b>   | Phosphoribosyl pyrophosphate synthetase 2 [Source:HGNC Symbol;Acc:9465]                           |  |
| <b>PRPSAP2</b> | Phosphoribosyl pyrophosphate synthetase-associated protein 2 [Source:HGNC Symbol;Acc:9467]        |  |
| <b>PRR12</b>   | Proline rich 12 [Source:HGNC Symbol;Acc:29217]                                                    |  |
| <b>PRR14L</b>  | Proline rich 14-like [Source:HGNC Symbol;Acc:28738]                                               |  |
| <b>PRR18</b>   | Proline rich 18 [Source:HGNC Symbol;Acc:28574]                                                    |  |
| <b>PRR25</b>   | Proline rich 25 [Source:HGNC Symbol;Acc:37230]                                                    |  |
| <b>PRR5</b>    | Proline rich 5 (renal) [Source:HGNC Symbol;Acc:31682]                                             |  |
| <b>PRR5L</b>   | Proline rich 5 like [Source:HGNC Symbol;Acc:25878]                                                |  |
| <b>PRR7</b>    | Proline rich 7 (synaptic) [Source:HGNC Symbol;Acc:28130]                                          |  |
| <b>PRRC1</b>   | Proline-rich coiled-coil 1 [Source:HGNC Symbol;Acc:28164]                                         |  |
| <b>PRRC2B</b>  | Proline-rich coiled-coil 2B [Source:HGNC Symbol;Acc:28121]                                        |  |
| <b>PRRG3</b>   | Proline rich Gla (G-carboxyglutamic acid) 3 (transmembrane) [Source:HGNC Symbol;Acc:30798]        |  |
| <b>PRRG4</b>   | Proline rich Gla (G-carboxyglutamic acid) 4 (transmembrane) [Source:HGNC Symbol;Acc:30799]        |  |
| <b>PRSS12</b>  | Protease, serine, 12 (neurotrypsin, motopsin) [Source:HGNC Symbol;Acc:9477]                       |  |
| <b>PRSS16</b>  | Protease, serine, 16 (thymus) [Source:HGNC Symbol;Acc:9480]                                       |  |
| <b>PRSS23</b>  | Protease, serine, 23 [Source:HGNC Symbol;Acc:14370]                                               |  |
| <b>PRSS3</b>   | Protease, serine, 3 [Source:HGNC Symbol;Acc:9486]                                                 |  |
| <b>PRSS42</b>  | Protease, serine, 42 [Source:HGNC Symbol;Acc:30716]                                               |  |
| <b>PRSS45</b>  | Protease, serine, 45 [Source:HGNC Symbol;Acc:30717]                                               |  |
| <b>PRSS54</b>  | Protease, serine, 54 [Source:HGNC Symbol;Acc:26336]                                               |  |
| <b>PRSS55</b>  | Protease, serine, 55 [Source:HGNC Symbol;Acc:30824]                                               |  |

|                |                                                                                                                         |  |
|----------------|-------------------------------------------------------------------------------------------------------------------------|--|
| <b>PRTFDC1</b> | Phosphoribosyl transferase domain containing 1 [Source:HGNC Symbol;Acc:23333]                                           |  |
| <b>PRTG</b>    | Protogenin [Source:HGNC Symbol;Acc:26373]                                                                               |  |
| <b>PRUNE2</b>  | Prune homolog 2 (Drosophila) [Source:HGNC Symbol;Acc:25209]                                                             |  |
| <b>PRX</b>     | Periaxin [Source:HGNC Symbol;Acc:13797]                                                                                 |  |
| <b>PSAP</b>    | Prosaposin [Source:HGNC Symbol;Acc:9498]                                                                                |  |
| <b>PSAPL1</b>  | Prosaposin-like 1 (gene/pseudogene) [Source:HGNC Symbol;Acc:33131]                                                      |  |
| <b>PSAT1</b>   | Phosphoserine aminotransferase 1 [Source:HGNC Symbol;Acc:19129]                                                         |  |
| <b>PSCA</b>    | Prostate stem cell antigen [Source:HGNC Symbol;Acc:9500]                                                                |  |
| <b>PSD2</b>    | Pleckstrin and Sec7 domain containing 2 [Source:HGNC Symbol;Acc:19092]                                                  |  |
| <b>PSD3</b>    | Pleckstrin and Sec7 domain containing 3 [Source:HGNC Symbol;Acc:19093]                                                  |  |
| <b>PSG1</b>    | Pregnancy specific beta-1-glycoprotein 1 [Source:HGNC Symbol;Acc:9514]                                                  |  |
| <b>PSG11</b>   | Pregnancy specific beta-1-glycoprotein 11 [Source:HGNC Symbol;Acc:9516]                                                 |  |
| <b>PSG3</b>    | Pregnancy specific beta-1-glycoprotein 3 [Source:HGNC Symbol;Acc:9520]                                                  |  |
| <b>PSG9</b>    | Pregnancy specific beta-1-glycoprotein 9 [Source:HGNC Symbol;Acc:9526]                                                  |  |
| <b>PSKH1</b>   | Protein serine kinase H1 [Source:HGNC Symbol;Acc:9529]                                                                  |  |
| <b>PSMA4</b>   | Proteasome (prosome, macropain) subunit, alpha type, 4 [Source:HGNC Symbol;Acc:9533]                                    |  |
| <b>PSMA5</b>   | Proteasome (prosome, macropain) subunit, alpha type, 5 [Source:HGNC Symbol;Acc:9534]                                    |  |
| <b>PSMA8</b>   | Proteasome (prosome, macropain) subunit, alpha type, 8 [Source:HGNC Symbol;Acc:22985]                                   |  |
| <b>PSMB9</b>   | Proteasome (prosome, macropain) subunit, beta type, 9 (large multifunctional peptidase 2) [Source:HGNC Symbol;Acc:9546] |  |
| <b>PSMC1</b>   | Proteasome (prosome, macropain) 26S subunit, atpase, 1 [Source:HGNC Symbol;Acc:9547]                                    |  |

|                |                                                                                                                     |   |
|----------------|---------------------------------------------------------------------------------------------------------------------|---|
| <b>PSMC3</b>   | Proteasome (prosome, macropain) 26S subunit, atpase, 3 [Source:HGNC Symbol;Acc:9549]                                |   |
| <b>PSMD13</b>  | Proteasome (prosome, macropain) 26S subunit, non-atpase, 13 [Source:HGNC Symbol;Acc:9558]                           |   |
| <b>PSME4</b>   | Proteasome (prosome, macropain) activator subunit 4 [Source:HGNC Symbol;Acc:20635]                                  |   |
| <b>PSMF1</b>   | Proteasome (prosome, macropain) inhibitor subunit 1 (PI31) [Source:HGNC Symbol;Acc:9571]                            |   |
| <b>PSMG4</b>   | Proteasome (prosome, macropain) assembly chaperone 4 [Source:HGNC Symbol;Acc:21108]                                 |   |
| <b>PSPC1</b>   | Paraspeckle component 1 [Source:HGNC Symbol;Acc:20320]                                                              |   |
| <b>PSRC1</b>   | Proline/serine-rich coiled-coil 1 [Source:HGNC Symbol;Acc:24472]                                                    |   |
| <b>PSTPIP1</b> | Proline-serine-threonine phosphatase interacting protein 1 [Source:HGNC Symbol;Acc:9580]                            |   |
| <b>PTCD3</b>   | Pentatricopeptide repeat domain 3 [Source:HGNC Symbol;Acc:24717]                                                    |   |
| <b>PTCHD1</b>  | Patched domain containing 1 [Source:HGNC Symbol;Acc:26392]                                                          |   |
| <b>PTCHD2</b>  | Patched domain containing 2 [Source:HGNC Symbol;Acc:29251]                                                          |   |
| <b>PTCHD3</b>  | Patched domain containing 3 [Source:HGNC Symbol;Acc:24776]                                                          |   |
| <b>PTDSS2</b>  | Phosphatidylserine synthase 2 [Source:HGNC Symbol;Acc:15463]                                                        |   |
| <b>PTEN</b>    | Phosphatase and tensin homolog                                                                                      | √ |
| <b>PTGDS</b>   | Prostaglandin D2 synthase 21kda (brain) [Source:HGNC Symbol;Acc:9592]                                               |   |
| <b>PTGER3</b>  | Prostaglandin E receptor 3 (subtype EP3) [Source:HGNC Symbol;Acc:9595]                                              |   |
| <b>PTGES2</b>  | Prostaglandin E synthase 2 [Source:HGNC Symbol;Acc:17822]                                                           |   |
| <b>PTGFRN</b>  | Prostaglandin F2 receptor negative regulator [Source:HGNC Symbol;Acc:9601]                                          |   |
| <b>PTGIS</b>   | Prostaglandin I2 (prostacyclin) synthase [Source:HGNC Symbol;Acc:9603]                                              |   |
| <b>PTGS1</b>   | Prostaglandin-endoperoxide synthase 1 (prostaglandin G/H synthase and cyclooxygenase) [Source:HGNC Symbol;Acc:9604] |   |
| <b>PTGS2</b>   | Prostaglandin-endoperoxide synthase 2 (prostaglandin G/H synthase and cyclooxygenase) [Source:HGNC Symbol;Acc:9605] |   |
| <b>PTH1R</b>   | Parathyroid hormone 1 receptor [Source:HGNC Symbol;Acc:9608]                                                        |   |
| <b>PTH2</b>    | Parathyroid hormone 2 [Source:HGNC Symbol;Acc:30828]                                                                |   |

|               |                                                                                                     |   |
|---------------|-----------------------------------------------------------------------------------------------------|---|
| <b>PTH2R</b>  | Parathyroid hormone 2 receptor [Source:HGNC Symbol;Acc:9609]                                        |   |
| <b>PTHLH</b>  | Parathyroid hormone-like hormone [Source:HGNC Symbol;Acc:9607]                                      |   |
| <b>PTK2</b>   | PTK2 protein tyrosine kinase 2 [Source:HGNC Symbol;Acc:9611]                                        |   |
| <b>PTK2B</b>  | PTK2B protein tyrosine kinase 2 beta [Source:HGNC Symbol;Acc:9612]                                  |   |
| <b>PTK7</b>   | PTK7 protein tyrosine kinase 7 [Source:HGNC Symbol;Acc:9618]                                        |   |
| <b>PTPN11</b> | Protein tyrosine phosphatase, non-receptor type 11                                                  | √ |
| <b>PTPN12</b> | Protein tyrosine phosphatase, non-receptor type 12 [Source:HGNC Symbol;Acc:9645]                    |   |
| <b>PTPN14</b> | Protein tyrosine phosphatase, non-receptor type 14 [Source:HGNC Symbol;Acc:9647]                    |   |
| <b>PTPN18</b> | Protein tyrosine phosphatase, non-receptor type 18 (brain-derived) [Source:HGNC Symbol;Acc:9649]    |   |
| <b>PTPN22</b> | Protein tyrosine phosphatase, non-receptor type 22 (lymphoid) [Source:HGNC Symbol;Acc:9652]         |   |
| <b>PTPN4</b>  | Protein tyrosine phosphatase, non-receptor type 4 (megakaryocyte) [Source:HGNC Symbol;Acc:9656]     |   |
| <b>PTPN5</b>  | Protein tyrosine phosphatase, non-receptor type 5 (striatum-enriched) [Source:HGNC Symbol;Acc:9657] |   |
| <b>PTPN6</b>  | Protein tyrosine phosphatase, non-receptor type 6 [Source:HGNC Symbol;Acc:9658]                     |   |
| <b>PTPN7</b>  | Protein tyrosine phosphatase, non-receptor type 7 [Source:HGNC Symbol;Acc:9659]                     |   |
| <b>PTPRA</b>  | Protein tyrosine phosphatase, receptor type, A [Source:HGNC Symbol;Acc:9664]                        |   |
| <b>PTPRB</b>  | Protein tyrosine phosphatase, receptor type, B [Source:HGNC Symbol;Acc:9665]                        |   |
| <b>PTPRC</b>  | Protein tyrosine phosphatase, receptor type, C                                                      | √ |
| <b>PTPRE</b>  | Protein tyrosine phosphatase, receptor type, E [Source:HGNC Symbol;Acc:9669]                        |   |
| <b>PTPRF</b>  | Protein tyrosine phosphatase, receptor type, F [Source:HGNC Symbol;Acc:9670]                        |   |
| <b>PTPRG</b>  | Protein tyrosine phosphatase, receptor type, G [Source:HGNC Symbol;Acc:9671]                        |   |

|                |                                                                                            |  |
|----------------|--------------------------------------------------------------------------------------------|--|
| <b>PTPRJ</b>   | Protein tyrosine phosphatase, receptor type, J [Source:HGNC Symbol;Acc:9673]               |  |
| <b>PTPRK</b>   | Protein tyrosine phosphatase, receptor type, K [Source:HGNC Symbol;Acc:9674]               |  |
| <b>PTPRO</b>   | Protein tyrosine phosphatase, receptor type, O [Source:HGNC Symbol;Acc:9678]               |  |
| <b>PTPRQ</b>   | Protein tyrosine phosphatase, receptor type, Q [Source:HGNC Symbol;Acc:9679]               |  |
| <b>PTPRR</b>   | Protein tyrosine phosphatase, receptor type, R [Source:HGNC Symbol;Acc:9680]               |  |
| <b>PTPRS</b>   | Protein tyrosine phosphatase, receptor type, S [Source:HGNC Symbol;Acc:9681]               |  |
| <b>PTPRT</b>   | Protein tyrosine phosphatase, receptor type, T [Source:HGNC Symbol;Acc:9682]               |  |
| <b>PTPRZ1</b>  | Protein tyrosine phosphatase, receptor-type, Z polypeptide 1 [Source:HGNC Symbol;Acc:9685] |  |
| <b>PTRH1</b>   | Peptidyl-trna hydrolase 1 homolog (S. Cerevisiae) [Source:HGNC Symbol;Acc:27039]           |  |
| <b>PVALB</b>   | Parvalbumin [Source:HGNC Symbol;Acc:9704]                                                  |  |
| <b>PVRL1</b>   | Poliovirus receptor-related 1 (herpesvirus entry mediator C) [Source:HGNC Symbol;Acc:9706] |  |
| <b>PVRL3</b>   | Poliovirus receptor-related 3 [Source:HGNC Symbol;Acc:17664]                               |  |
| <b>PVRL4</b>   | Poliovirus receptor-related 4 [Source:HGNC Symbol;Acc:19688]                               |  |
| <b>PWP2</b>    | PWP2 periodic tryptophan protein homolog (yeast) [Source:HGNC Symbol;Acc:9711]             |  |
| <b>PXDN</b>    | Peroxidasin homolog (Drosophila) [Source:HGNC Symbol;Acc:14966]                            |  |
| <b>PXN</b>     | Paxillin [Source:HGNC Symbol;Acc:9718]                                                     |  |
| <b>PXT1</b>    | Peroxisomal, testis specific 1 [Source:HGNC Symbol;Acc:18312]                              |  |
| <b>PYGB</b>    | Phosphorylase, glycogen; brain [Source:HGNC Symbol;Acc:9723]                               |  |
| <b>PYGO1</b>   | Pygopus homolog 1 (Drosophila) [Source:HGNC Symbol;Acc:30256]                              |  |
| <b>PYROXD1</b> | Pyridine nucleotide-disulphide oxidoreductase domain 1 [Source:HGNC Symbol;Acc:26162]      |  |



|                  |                                                                                       |  |
|------------------|---------------------------------------------------------------------------------------|--|
| <b>PYROXD2</b>   | Pyridine nucleotide-disulphide oxidoreductase domain 2 [Source:HGNC Symbol;Acc:23517] |  |
| <b>QARS</b>      | Glutaminyl-trna synthetase [Source:HGNC Symbol;Acc:9751]                              |  |
| <b>QRICH1</b>    | Glutamine-rich 1 [Source:HGNC Symbol;Acc:24713]                                       |  |
| <b>QSER1</b>     | Glutamine and serine rich 1 [Source:HGNC Symbol;Acc:26154]                            |  |
| <b>QSOX1</b>     | Quiescin Q6 sulfhydryl oxidase 1 [Source:HGNC Symbol;Acc:9756]                        |  |
| <b>QSOX2</b>     | Quiescin Q6 sulfhydryl oxidase 2 [Source:HGNC Symbol;Acc:30249]                       |  |
| <b>QTRTD1</b>    | Queuine trna-ribosyltransferase domain containing 1 [Source:HGNC Symbol;Acc:25771]    |  |
| <b>R3HDM2</b>    | R3H domain containing 2 [Source:HGNC Symbol;Acc:29167]                                |  |
| <b>RAB11FIP1</b> | RAB11 family interacting protein 1 (class I) [Source:HGNC Symbol;Acc:30265]           |  |
| <b>RAB11FIP3</b> | RAB11 family interacting protein 3 (class II) [Source:HGNC Symbol;Acc:17224]          |  |
| <b>RAB11FIP4</b> | RAB11 family interacting protein 4 (class II) [Source:HGNC Symbol;Acc:30267]          |  |
| <b>RAB12</b>     | RAB12, member RAS oncogene family [Source:HGNC Symbol;Acc:31332]                      |  |
| <b>RAB17</b>     | RAB17, member RAS oncogene family [Source:HGNC Symbol;Acc:16523]                      |  |
| <b>RAB18</b>     | RAB18, member RAS oncogene family [Source:HGNC Symbol;Acc:14244]                      |  |
| <b>RAB20</b>     | RAB20, member RAS oncogene family [Source:HGNC Symbol;Acc:18260]                      |  |
| <b>RAB22A</b>    | RAB22A, member RAS oncogene family [Source:HGNC Symbol;Acc:9764]                      |  |
| <b>RAB25</b>     | RAB25, member RAS oncogene family [Source:HGNC Symbol;Acc:18238]                      |  |
| <b>RAB27B</b>    | RAB27B, member RAS oncogene family [Source:HGNC Symbol;Acc:9767]                      |  |
| <b>RAB2B</b>     | RAB2B, member RAS oncogene family [Source:HGNC Symbol;Acc:20246]                      |  |
| <b>RAB31</b>     | RAB31, member RAS oncogene family [Source:HGNC Symbol;Acc:9771]                       |  |
| <b>RAB36</b>     | RAB36, member RAS oncogene family [Source:HGNC Symbol;Acc:9775]                       |  |
| <b>RAB37</b>     | RAB37, member RAS oncogene family [Source:HGNC Symbol;Acc:30268]                      |  |
| <b>RAB38</b>     | RAB38, member RAS oncogene family [Source:HGNC Symbol;Acc:9776]                       |  |
| <b>RAB3B</b>     | RAB3B, member RAS oncogene family [Source:HGNC Symbol;Acc:9778]                       |  |

|                 |                                                                                         |  |
|-----------------|-----------------------------------------------------------------------------------------|--|
| <b>RAB3GAP1</b> | RAB3 gtpase activating protein subunit 1 (catalytic) [Source:HGNC Symbol;Acc:17063]     |  |
| <b>RAB3GAP2</b> | RAB3 gtpase activating protein subunit 2 (non-catalytic) [Source:HGNC Symbol;Acc:17168] |  |
| <b>RAB3IL1</b>  | RAB3A interacting protein (rabin3)-like 1 [Source:HGNC Symbol;Acc:9780]                 |  |
| <b>RAB3IP</b>   | RAB3A interacting protein (rabin3) [Source:HGNC Symbol;Acc:16508]                       |  |
| <b>RAB42</b>    | RAB42, member RAS oncogene family [Source:HGNC Symbol;Acc:28702]                        |  |
| <b>RAB4A</b>    | RAB4A, member RAS oncogene family [Source:HGNC Symbol;Acc:9781]                         |  |
| <b>RAB5A</b>    | RAB5A, member RAS oncogene family [Source:HGNC Symbol;Acc:9783]                         |  |
| <b>RAB5B</b>    | RAB5B, member RAS oncogene family [Source:HGNC Symbol;Acc:9784]                         |  |
| <b>RAB6A</b>    | RAB6A, member RAS oncogene family [Source:HGNC Symbol;Acc:9786]                         |  |
| <b>RAB6B</b>    | RAB6B, member RAS oncogene family [Source:HGNC Symbol;Acc:14902]                        |  |
| <b>RAB6C</b>    | RAB6C, member RAS oncogene family [Source:HGNC Symbol;Acc:16525]                        |  |
| <b>RAB7L1</b>   | RAB7, member RAS oncogene family-like 1 [Source:HGNC Symbol;Acc:9789]                   |  |
| <b>RAB8A</b>    | RAB8A, member RAS oncogene family [Source:HGNC Symbol;Acc:7007]                         |  |
| <b>RABEP1</b>   | Rabaptin, RAB gtpase binding effector protein 1 [Source:HGNC Symbol;Acc:17677]          |  |
| <b>RABEP2</b>   | Rabaptin, RAB gtpase binding effector protein 2 [Source:HGNC Symbol;Acc:24817]          |  |
| <b>RABGAP1</b>  | RAB gtpase activating protein 1 [Source:HGNC Symbol;Acc:17155]                          |  |
| <b>RABGAP1L</b> | RAB gtpase activating protein 1-like [Source:HGNC Symbol;Acc:24663]                     |  |
| <b>RABGEF1</b>  | RAB guanine nucleotide exchange factor (GEF) 1 [Source:HGNC Symbol;Acc:17676]           |  |
| <b>RABGGTB</b>  | Rab geranylgeranyltransferase, beta subunit [Source:HGNC Symbol;Acc:9796]               |  |
| <b>RABL2A</b>   | RAB, member of RAS oncogene family-like 2A [Source:HGNC Symbol;Acc:9799]                |  |
| <b>RABL5</b>    | RAB, member RAS oncogene family-like 5 [Source:HGNC Symbol;Acc:21895]                   |  |

|                 |                                                                                                                 |   |
|-----------------|-----------------------------------------------------------------------------------------------------------------|---|
| <b>RAD1</b>     | RAD1 homolog (S. Pombe) [Source:HGNC Symbol;Acc:9806]                                                           |   |
| <b>RAD17</b>    | RAD17 homolog (S. Pombe) [Source:HGNC Symbol;Acc:9807]                                                          |   |
| <b>RAD21</b>    | RAD21 homolog ( <i>S. Pombe</i> )                                                                               | √ |
| <b>RAD23A</b>   | RAD23 homolog A (S. Cerevisiae) [Source:HGNC Symbol;Acc:9812]                                                   |   |
| <b>RAD50</b>    | RAD50 homolog (S. Cerevisiae) [Source:HGNC Symbol;Acc:9816]                                                     |   |
| <b>RAD51</b>    | RAD51 homolog (reca homolog, E. Coli) (S. Cerevisiae) [Source:HGNC Symbol;Acc:9817]                             |   |
| <b>RAD52</b>    | RAD52 homolog (S. Cerevisiae) [Source:HGNC Symbol;Acc:9824]                                                     |   |
| <b>RAD54L2</b>  | RAD54-like 2 (S. Cerevisiae) [Source:HGNC Symbol;Acc:29123]                                                     |   |
| <b>RAD9B</b>    | RAD9 homolog B (S. Pombe) [Source:HGNC Symbol;Acc:21700]                                                        |   |
| <b>RAET1G</b>   | Retinoic acid early transcript 1G [Source:HGNC Symbol;Acc:16795]                                                |   |
| <b>RAET1L</b>   | Retinoic acid early transcript 1L [Source:HGNC Symbol;Acc:16798]                                                |   |
| <b>RAF1</b>     | V-raf-1 murine leukemia viral oncogene homolog 1                                                                | √ |
| <b>RAG1</b>     | Recombination activating gene 1 [Source:HGNC Symbol;Acc:9831]                                                   |   |
| <b>RAG2</b>     | Recombination activating gene 2 [Source:HGNC Symbol;Acc:9832]                                                   |   |
| <b>RAGE</b>     | Renal tumor antigen [Source:HGNC Symbol;Acc:9833]                                                               |   |
| <b>RAI1</b>     | Retinoic acid induced 1 [Source:HGNC Symbol;Acc:9834]                                                           |   |
| <b>RAI14</b>    | Retinoic acid induced 14 [Source:HGNC Symbol;Acc:14873]                                                         |   |
| <b>RALB</b>     | V-ral simian leukemia viral oncogene homolog B (ras related; GTP binding protein) [Source:HGNC Symbol;Acc:9840] |   |
| <b>RALBP1</b>   | Rala binding protein 1 [Source:HGNC Symbol;Acc:9841]                                                            |   |
| <b>RALGAPA1</b> | Ral gtpase activating protein, alpha subunit 1 (catalytic) [Source:HGNC Symbol;Acc:17770]                       |   |
| <b>RALGAPA2</b> | Ral gtpase activating protein, alpha subunit 2 (catalytic) [Source:HGNC Symbol;Acc:16207]                       |   |
| <b>RALGDS</b>   | Ral guanine nucleotide dissociation stimulator                                                                  | √ |
| <b>RALGPS1</b>  | Ral GEF with PH domain and SH3 binding motif 1 [Source:HGNC Symbol;Acc:16851]                                   |   |
| <b>RALGPS2</b>  | Ral GEF with PH domain and SH3 binding motif 2 [Source:HGNC Symbol;Acc:30279]                                   |   |
| <b>RANBP17</b>  | RAN binding protein 17                                                                                          | √ |
| <b>RANBP2</b>   | RAN binding protein 2 [Source:HGNC Symbol;Acc:9848]                                                             |   |
| <b>RANGAP1</b>  | Ran gtpase activating protein 1 [Source:HGNC Symbol;Acc:9854]                                                   |   |

|                 |                                                                                                |  |
|-----------------|------------------------------------------------------------------------------------------------|--|
| <b>RANGRF</b>   | RAN guanine nucleotide release factor [Source:HGNC Symbol;Acc:17679]                           |  |
| <b>RAP1GAP</b>  | RAP1 gtpase activating protein [Source:HGNC Symbol;Acc:9858]                                   |  |
| <b>RAP2A</b>    | RAP2A, member of RAS oncogene family [Source:HGNC Symbol;Acc:9861]                             |  |
| <b>RAP2B</b>    | RAP2B, member of RAS oncogene family [Source:HGNC Symbol;Acc:9862]                             |  |
| <b>RAPGEF1</b>  | Rap guanine nucleotide exchange factor (GEF) 1 [Source:HGNC Symbol;Acc:4568]                   |  |
| <b>RAPGEF3</b>  | Rap guanine nucleotide exchange factor (GEF) 3 [Source:HGNC Symbol;Acc:16629]                  |  |
| <b>RAPGEF5</b>  | Rap guanine nucleotide exchange factor (GEF) 5 [Source:HGNC Symbol;Acc:16862]                  |  |
| <b>RAPGEFL1</b> | Rap guanine nucleotide exchange factor (GEF)-like 1 [Source:HGNC Symbol;Acc:17428]             |  |
| <b>RAPH1</b>    | Ras association (ralgds/AF-6) and pleckstrin homology domains 1 [Source:HGNC Symbol;Acc:14436] |  |
| <b>RARB</b>     | Retinoic acid receptor, beta [Source:HGNC Symbol;Acc:9865]                                     |  |
| <b>RARRES1</b>  | Retinoic acid receptor responder (tazarotene induced) 1 [Source:HGNC Symbol;Acc:9867]          |  |
| <b>RASA1</b>    | RAS p21 protein activator (gtpase activating protein) 1 [Source:HGNC Symbol;Acc:9871]          |  |
| <b>RASA3</b>    | RAS p21 protein activator 3 [Source:HGNC Symbol;Acc:20331]                                     |  |
| <b>RASAL1</b>   | RAS protein activator like 1 (GAP1 like) [Source:HGNC Symbol;Acc:9873]                         |  |
| <b>RASAL2</b>   | RAS protein activator like 2 [Source:HGNC Symbol;Acc:9874]                                     |  |
| <b>RASD2</b>    | RASD family, member 2 [Source:HGNC Symbol;Acc:18229]                                           |  |
| <b>RASEF</b>    | RAS and EF-hand domain containing [Source:HGNC Symbol;Acc:26464]                               |  |
| <b>RASGEF1A</b> | Rasgef domain family, member 1A [Source:HGNC Symbol;Acc:24246]                                 |  |
| <b>RASGRF1</b>  | Ras protein-specific guanine nucleotide-releasing factor 1 [Source:HGNC Symbol;Acc:9875]       |  |
| <b>RASGRP2</b>  | RAS guanyl releasing protein 2 (calcium and DAG-regulated) [Source:HGNC Symbol;Acc:9879]       |  |
| <b>RASGRP3</b>  | RAS guanyl releasing protein 3 (calcium and DAG-regulated) [Source:HGNC Symbol;Acc:14545]      |  |

|                   |                                                                                         |  |
|-------------------|-----------------------------------------------------------------------------------------|--|
| <b>RASL10B</b>    | RAS-like, family 10, member B [Source:HGNC Symbol;Acc:30295]                            |  |
| <b>RASL12</b>     | RAS-like, family 12 [Source:HGNC Symbol;Acc:30289]                                      |  |
| <b>RAX2</b>       | Retina and anterior neural fold homeobox 2 [Source:HGNC Symbol;Acc:18286]               |  |
| <b>RBAK</b>       | RB-associated KRAB zinc finger [Source:HGNC Symbol;Acc:17680]                           |  |
| <b>RBBP5</b>      | Retinoblastoma binding protein 5 [Source:HGNC Symbol;Acc:9888]                          |  |
| <b>RBBP6</b>      | Retinoblastoma binding protein 6 [Source:HGNC Symbol;Acc:9889]                          |  |
| <b>RBBP9</b>      | Retinoblastoma binding protein 9 [Source:HGNC Symbol;Acc:9892]                          |  |
| <b>RBFA</b>       | Ribosome binding factor A (putative) [Source:HGNC Symbol;Acc:26120]                     |  |
| <b>RBFOX1</b>     | RNA binding protein, fox-1 homolog (C. Elegans) 1 [Source:HGNC Symbol;Acc:18222]        |  |
| <b>RBFOX2</b>     | RNA binding protein, fox-1 homolog (C. Elegans) 2 [Source:HGNC Symbol;Acc:9906]         |  |
| <b>RBM11</b>      | RNA binding motif protein 11 [Source:HGNC Symbol;Acc:9897]                              |  |
| <b>RBM14</b>      | RNA binding motif protein 14 [Source:HGNC Symbol;Acc:14219]                             |  |
| <b>RBM14-RBM4</b> | RBM14-RBM4 readthrough [Source:HGNC Symbol;Acc:38840]                                   |  |
| <b>RBM22</b>      | RNA binding motif protein 22 [Source:HGNC Symbol;Acc:25503]                             |  |
| <b>RBM27</b>      | RNA binding motif protein 27 [Source:HGNC Symbol;Acc:29243]                             |  |
| <b>RBM33</b>      | RNA binding motif protein 33 [Source:HGNC Symbol;Acc:27223]                             |  |
| <b>RBM38</b>      | RNA binding motif protein 38 [Source:HGNC Symbol;Acc:15818]                             |  |
| <b>RBM43</b>      | RNA binding motif protein 43 [Source:HGNC Symbol;Acc:24790]                             |  |
| <b>RBM46</b>      | RNA binding motif protein 46 [Source:HGNC Symbol;Acc:28401]                             |  |
| <b>RBM47</b>      | RNA binding motif protein 47 [Source:HGNC Symbol;Acc:30358]                             |  |
| <b>RBM6</b>       | RNA binding motif protein 6 [Source:HGNC Symbol;Acc:9903]                               |  |
| <b>RBMS1</b>      | RNA binding motif, single stranded interacting protein 1 [Source:HGNC Symbol;Acc:9907]  |  |
| <b>RBMS2</b>      | RNA binding motif, single stranded interacting protein 2 [Source:HGNC Symbol;Acc:9909]  |  |
| <b>RBMS3</b>      | RNA binding motif, single stranded interacting protein 3 [Source:HGNC Symbol;Acc:13427] |  |
| <b>RBMXL1</b>     | RNA binding motif protein, X-linked-like 1 [Source:HGNC Symbol;Acc:25073]               |  |

|                |                                                                                                                     |   |
|----------------|---------------------------------------------------------------------------------------------------------------------|---|
| <b>RBP3</b>    | Retinol binding protein 3, interstitial [Source:HGNC Symbol;Acc:9921]                                               |   |
| <b>RCAN2</b>   | Regulator of calcineurin 2 [Source:HGNC Symbol;Acc:3041]                                                            |   |
| <b>RCAN3</b>   | RCAN family member 3 [Source:HGNC Symbol;Acc:3042]                                                                  |   |
| <b>RCBTB2</b>  | Regulator of chromosome condensation (RCC1) and BTB (POZ) domain containing protein 2 [Source:HGNC Symbol;Acc:1914] |   |
| <b>RCE1</b>    | RCE1 homolog, prenyl protein peptidase ( <i>S. Cerevisiae</i> ) [Source:HGNC Symbol;Acc:13721]                      |   |
| <b>RCL1</b>    | RNA terminal phosphate cyclase-like 1 [Source:HGNC Symbol;Acc:17687]                                                |   |
| <b>RCN2</b>    | Reticulocalbin 2, EF-hand calcium binding domain [Source:HGNC Symbol;Acc:9935]                                      |   |
| <b>RCOR1</b>   | REST corepressor 1 [Source:HGNC Symbol;Acc:17441]                                                                   |   |
| <b>RCOR2</b>   | REST corepressor 2 [Source:HGNC Symbol;Acc:27455]                                                                   |   |
| <b>RCOR3</b>   | REST corepressor 3 [Source:HGNC Symbol;Acc:25594]                                                                   |   |
| <b>RDH16</b>   | Retinol dehydrogenase 16 (all-trans) [Source:HGNC Symbol;Acc:29674]                                                 |   |
| <b>RECK</b>    | Reversion-inducing-cysteine-rich protein with kazal motifs [Source:HGNC Symbol;Acc:11345]                           |   |
| <b>RECQL</b>   | Recq protein-like (DNA helicase Q1-like) [Source:HGNC Symbol;Acc:9948]                                              |   |
| <b>REEP3</b>   | Receptor accessory protein 3 [Source:HGNC Symbol;Acc:23711]                                                         |   |
| <b>REEP4</b>   | Receptor accessory protein 4 [Source:HGNC Symbol;Acc:26176]                                                         |   |
| <b>RENBP</b>   | Renin binding protein [Source:HGNC Symbol;Acc:9959]                                                                 |   |
| <b>REPIN1</b>  | Replication initiator 1 [Source:HGNC Symbol;Acc:17922]                                                              |   |
| <b>RET</b>     | Ret proto-oncogene                                                                                                  | √ |
| <b>RETSAT</b>  | Retinol saturase (all-trans-retinol 13,14-reductase) [Source:HGNC Symbol;Acc:25991]                                 |   |
| <b>REV3L</b>   | REV3-like, catalytic subunit of DNA polymerase zeta (yeast) [Source:HGNC Symbol;Acc:9968]                           |   |
| <b>REXO1L1</b> | REX1, RNA exonuclease 1 homolog ( <i>S. Cerevisiae</i> )-like 1 [Source:HGNC Symbol;Acc:24660]                      |   |
| <b>REXO4</b>   | REX4, RNA exonuclease 4 homolog ( <i>S. Cerevisiae</i> ) [Source:HGNC Symbol;Acc:12820]                             |   |
| <b>RFC1</b>    | Replication factor C (activator 1) 1, 145kda [Source:HGNC Symbol;Acc:9969]                                          |   |

|              |                                                                                           |  |
|--------------|-------------------------------------------------------------------------------------------|--|
| <b>RFC2</b>  | Replication factor C (activator 1) 2, 40kda [Source:HGNC Symbol;Acc:9970]                 |  |
| <b>RFC3</b>  | Replication factor C (activator 1) 3, 38kda [Source:HGNC Symbol;Acc:9971]                 |  |
| <b>RFPL1</b> | Ret finger protein-like 1 [Source:HGNC Symbol;Acc:9977]                                   |  |
| <b>RFT1</b>  | RFT1 homolog (S. Cerevisiae) [Source:HGNC Symbol;Acc:30220]                               |  |
| <b>RFTN1</b> | Raftlin, lipid raft linker 1 [Source:HGNC Symbol;Acc:30278]                               |  |
| <b>RFWD2</b> | Ring finger and WD repeat domain 2 [Source:HGNC Symbol;Acc:17440]                         |  |
| <b>RFX2</b>  | Regulatory factor X, 2 (influences HLA class II expression) [Source:HGNC Symbol;Acc:9983] |  |
| <b>RFX3</b>  | Regulatory factor X, 3 (influences HLA class II expression) [Source:HGNC Symbol;Acc:9984] |  |
| <b>RFX7</b>  | Regulatory factor X, 7 [Source:HGNC Symbol;Acc:25777]                                     |  |
| <b>RGAG1</b> | Retrotransposon gag domain containing 1 [Source:HGNC Symbol;Acc:29245]                    |  |
| <b>RGMA</b>  | RGM domain family, member A [Source:HGNC Symbol;Acc:30308]                                |  |
| <b>RGP1</b>  | RGP1 retrograde golgi transport homolog (S. Cerevisiae) [Source:HGNC Symbol;Acc:21965]    |  |
| <b>RGPD1</b> | RANBP2-like and GRIP domain containing 1 [Source:HGNC Symbol;Acc:32414]                   |  |
| <b>RGPD2</b> | RANBP2-like and GRIP domain containing 2 [Source:HGNC Symbol;Acc:32415]                   |  |
| <b>RGPD4</b> | RANBP2-like and GRIP domain containing 4 [Source:HGNC Symbol;Acc:32417]                   |  |
| <b>RGPD5</b> | RANBP2-like and GRIP domain containing 5 [Source:HGNC Symbol;Acc:32418]                   |  |
| <b>RGPD6</b> | RANBP2-like and GRIP domain containing 6 [Source:HGNC Symbol;Acc:32419]                   |  |
| <b>RGPD8</b> | RANBP2-like and GRIP domain containing 8 [Source:HGNC Symbol;Acc:9849]                    |  |
| <b>RGS12</b> | Regulator of G-protein signaling 12 [Source:HGNC Symbol;Acc:9994]                         |  |
| <b>RGS2</b>  | Regulator of G-protein signaling 2, 24kda [Source:HGNC Symbol;Acc:9998]                   |  |

|                |                                                                                                    |  |
|----------------|----------------------------------------------------------------------------------------------------|--|
| <b>RGS22</b>   | Regulator of G-protein signaling 22 [Source:HGNC Symbol;Acc:24499]                                 |  |
| <b>RGS3</b>    | Regulator of G-protein signaling 3 [Source:HGNC Symbol;Acc:9999]                                   |  |
| <b>RGS4</b>    | Regulator of G-protein signaling 4 [Source:HGNC Symbol;Acc:10000]                                  |  |
| <b>RGS5</b>    | Regulator of G-protein signaling 5 [Source:HGNC Symbol;Acc:10001]                                  |  |
| <b>RGS6</b>    | Regulator of G-protein signaling 6 [Source:HGNC Symbol;Acc:10002]                                  |  |
| <b>RGS7</b>    | Regulator of G-protein signaling 7 [Source:HGNC Symbol;Acc:10003]                                  |  |
| <b>RGS9BP</b>  | Regulator of G protein signaling 9 binding protein [Source:HGNC Symbol;Acc:30304]                  |  |
| <b>RHBDD1</b>  | Rhomboid domain containing 1 [Source:HGNC Symbol;Acc:23081]                                        |  |
| <b>RHBDD2</b>  | Rhomboid domain containing 2 [Source:HGNC Symbol;Acc:23082]                                        |  |
| <b>RHBDL3</b>  | Rhomboid, veinlet-like 3 (Drosophila) [Source:HGNC Symbol;Acc:16502]                               |  |
| <b>RHCE</b>    | Rh blood group, ccee antigens [Source:HGNC Symbol;Acc:10008]                                       |  |
| <b>RHD</b>     | Rh blood group, D antigen [Source:HGNC Symbol;Acc:10009]                                           |  |
| <b>RHEB</b>    | Ras homolog enriched in brain [Source:HGNC Symbol;Acc:10011]                                       |  |
| <b>RHO</b>     | Rhodopsin [Source:HGNC Symbol;Acc:10012]                                                           |  |
| <b>RHOBTB1</b> | Rho-related BTB domain containing 1 [Source:HGNC Symbol;Acc:18738]                                 |  |
| <b>RHOBTB2</b> | Rho-related BTB domain containing 2 [Source:HGNC Symbol;Acc:18756]                                 |  |
| <b>RHOH</b>    | Ras homolog gene family, member H [Source:HGNC Symbol;Acc:686]                                     |  |
| <b>RHPN2</b>   | Rhopilin, Rho gtpase binding protein 2 [Source:HGNC Symbol;Acc:19974]                              |  |
| <b>RIBC2</b>   | RIB43A domain with coiled-coils 2 [Source:HGNC Symbol;Acc:13241]                                   |  |
| <b>RIC3</b>    | Resistance to inhibitors of cholinesterase 3 homolog (C. Elegans) [Source:HGNC Symbol;Acc:30338]   |  |
| <b>RIC8A</b>   | Resistance to inhibitors of cholinesterase 8 homolog A (C. Elegans) [Source:HGNC Symbol;Acc:29550] |  |
| <b>RICTOR</b>  | RPTOR independent companion of MTOR, complex 2 [Source:HGNC Symbol;Acc:28611]                      |  |
| <b>RIF1</b>    | RAP1 interacting factor homolog (yeast) [Source:HGNC Symbol;Acc:23207]                             |  |
| <b>RILPL2</b>  | Rab interacting lysosomal protein-like 2 [Source:HGNC Symbol;Acc:28787]                            |  |
| <b>RIMBP2</b>  | RIMS binding protein 2 [Source:HGNC Symbol;Acc:30339]                                              |  |
| <b>RIMBP3</b>  | RIMS binding protein 3 [Source:HGNC Symbol;Acc:29344]                                              |  |
| <b>RIMS2</b>   | Regulating synaptic membrane exocytosis 2 [Source:HGNC Symbol;Acc:17283]                           |  |



|                 |                                                                                                                 |  |
|-----------------|-----------------------------------------------------------------------------------------------------------------|--|
| <b>RIMS3</b>    | Regulating synaptic membrane exocytosis 3 [Source:HGNC Symbol;Acc:21292]                                        |  |
| <b>RIMS4</b>    | Regulating synaptic membrane exocytosis 4 [Source:HGNC Symbol;Acc:16183]                                        |  |
| <b>RIN2</b>     | Ras and Rab interactor 2 [Source:HGNC Symbol;Acc:18750]                                                         |  |
| <b>RIN3</b>     | Ras and Rab interactor 3 [Source:HGNC Symbol;Acc:18751]                                                         |  |
| <b>RIOK1</b>    | RIO kinase 1 (yeast) [Source:HGNC Symbol;Acc:18656]                                                             |  |
| <b>RIPK2</b>    | Receptor-interacting serine-threonine kinase 2 [Source:HGNC Symbol;Acc:10020]                                   |  |
| <b>RIPK4</b>    | Receptor-interacting serine-threonine kinase 4 [Source:HGNC Symbol;Acc:496]                                     |  |
| <b>RLTPR</b>    | RGD motif, leucine rich repeats, tropomodulin domain and proline-rich containing [Source:HGNC Symbol;Acc:27089] |  |
| <b>RMND5A</b>   | Required for meiotic nuclear division 5 homolog A (S. Cerevisiae) [Source:HGNC Symbol;Acc:25850]                |  |
| <b>RNASEH2C</b> | Ribonuclease H2, subunit C [Source:HGNC Symbol;Acc:24116]                                                       |  |
| <b>RNASEL</b>   | Ribonuclease L (2',5'-oligoadenylate synthetase-dependent) [Source:HGNC Symbol;Acc:10050]                       |  |
| <b>RNASET2</b>  | Ribonuclease T2 [Source:HGNC Symbol;Acc:21686]                                                                  |  |
| <b>RND1</b>     | Rho family gtpase 1 [Source:HGNC Symbol;Acc:18314]                                                              |  |
| <b>RND2</b>     | Rho family gtpase 2 [Source:HGNC Symbol;Acc:18315]                                                              |  |
| <b>RNF11</b>    | Ring finger protein 11 [Source:HGNC Symbol;Acc:10056]                                                           |  |
| <b>RNF111</b>   | Ring finger protein 111 [Source:HGNC Symbol;Acc:17384]                                                          |  |
| <b>RNF114</b>   | Ring finger protein 114 [Source:HGNC Symbol;Acc:13094]                                                          |  |
| <b>RNF121</b>   | Ring finger protein 121 [Source:HGNC Symbol;Acc:21070]                                                          |  |
| <b>RNF123</b>   | Ring finger protein 123 [Source:HGNC Symbol;Acc:21148]                                                          |  |
| <b>RNF125</b>   | Ring finger protein 125 [Source:HGNC Symbol;Acc:21150]                                                          |  |
| <b>RNF128</b>   | Ring finger protein 128 [Source:HGNC Symbol;Acc:21153]                                                          |  |
| <b>RNF133</b>   | Ring finger protein 133 [Source:HGNC Symbol;Acc:21154]                                                          |  |
| <b>RNF141</b>   | Ring finger protein 141 [Source:HGNC Symbol;Acc:21159]                                                          |  |
| <b>RNF144B</b>  | Ring finger protein 144B [Source:HGNC Symbol;Acc:21578]                                                         |  |
| <b>RNF145</b>   | Ring finger protein 145 [Source:HGNC Symbol;Acc:20853]                                                          |  |
| <b>RNF152</b>   | Ring finger protein 152 [Source:HGNC Symbol;Acc:26811]                                                          |  |

|               |                                                                                           |  |
|---------------|-------------------------------------------------------------------------------------------|--|
| <b>RNF165</b> | Ring finger protein 165 [Source:HGNC Symbol;Acc:31696]                                    |  |
| <b>RNF169</b> | Ring finger protein 169 [Source:HGNC Symbol;Acc:26961]                                    |  |
| <b>RNF17</b>  | Ring finger protein 17 [Source:HGNC Symbol;Acc:10060]                                     |  |
| <b>RNF170</b> | Ring finger protein 170 [Source:HGNC Symbol;Acc:25358]                                    |  |
| <b>RNF175</b> | Ring finger protein 175 [Source:HGNC Symbol;Acc:27735]                                    |  |
| <b>RNF182</b> | Ring finger protein 182 [Source:HGNC Symbol;Acc:28522]                                    |  |
| <b>RNF19A</b> | Ring finger protein 19A [Source:HGNC Symbol;Acc:13432]                                    |  |
| <b>RNF19B</b> | Ring finger protein 19B [Source:HGNC Symbol;Acc:26886]                                    |  |
| <b>RNF20</b>  | Ring finger protein 20 [Source:HGNC Symbol;Acc:10062]                                     |  |
| <b>RNF213</b> | Ring finger protein 213 [Source:HGNC Symbol;Acc:14539]                                    |  |
| <b>RNF214</b> | Ring finger protein 214 [Source:HGNC Symbol;Acc:25335]                                    |  |
| <b>RNF216</b> | Ring finger protein 216 [Source:HGNC Symbol;Acc:21698]                                    |  |
| <b>RNF219</b> | Ring finger protein 219 [Source:HGNC Symbol;Acc:20308]                                    |  |
| <b>RNF32</b>  | Ring finger protein 32 [Source:HGNC Symbol;Acc:17118]                                     |  |
| <b>RNF34</b>  | Ring finger protein 34 [Source:HGNC Symbol;Acc:17297]                                     |  |
| <b>RNF38</b>  | Ring finger protein 38 [Source:HGNC Symbol;Acc:18052]                                     |  |
| <b>RNF40</b>  | Ring finger protein 40 [Source:HGNC Symbol;Acc:16867]                                     |  |
| <b>RNF8</b>   | Ring finger protein 8 [Source:HGNC Symbol;Acc:10071]                                      |  |
| <b>RNFT2</b>  | Ring finger protein, transmembrane 2 [Source:HGNC Symbol;Acc:25905]                       |  |
| <b>RNH1</b>   | Ribonuclease/angiogenin inhibitor 1 [Source:HGNC Symbol;Acc:10074]                        |  |
| <b>RNMT</b>   | RNA (guanine-7-) methyltransferase [Source:HGNC Symbol;Acc:10075]                         |  |
| <b>RNMTL1</b> | RNA methyltransferase like 1 [Source:HGNC Symbol;Acc:18485]                               |  |
| <b>ROBO1</b>  | Roundabout, axon guidance receptor, homolog 1 (Drosophila) [Source:HGNC Symbol;Acc:10249] |  |
| <b>ROBO2</b>  | Roundabout, axon guidance receptor, homolog 2 (Drosophila) [Source:HGNC Symbol;Acc:10250] |  |
| <b>ROBO4</b>  | Roundabout homolog 4, magic roundabout (Drosophila) [Source:HGNC Symbol;Acc:17985]        |  |
| <b>ROD1</b>   | ROD1 regulator of differentiation 1 (S. Pombe) [Source:HGNC Symbol;Acc:10253]             |  |
| <b>ROPN1L</b> | Rhophilin associated tail protein 1-like [Source:HGNC Symbol;Acc:24060]                   |  |
| <b>ROR2</b>   | Receptor tyrosine kinase-like orphan receptor 2 [Source:HGNC Symbol;Acc:10257]            |  |

|                        |                                                                                                                |   |
|------------------------|----------------------------------------------------------------------------------------------------------------|---|
| <b>ROS1</b>            | C-ros oncogene 1 , receptor tyrosine kinase                                                                    | √ |
| <b>RP1</b>             | Retinitis pigmentosa 1 (autosomal dominant)                                                                    |   |
| <b>RP11-1286E23.8</b>  | Ubiquitin carboxyl-terminal hydrolase 17 [Source:uniprotkb/Swiss-Prot;Acc:Q0WX57]                              |   |
| <b>RP11-1396O13.11</b> |                                                                                                                |   |
| <b>RP11-1396O13.4</b>  |                                                                                                                |   |
| <b>RP11-1396O13.5</b>  |                                                                                                                |   |
| <b>RP11-1396O13.7</b>  |                                                                                                                |   |
| <b>RP11-1396O13.8</b>  |                                                                                                                |   |
| <b>RP11-1396O13.9</b>  |                                                                                                                |   |
| <b>RP11-15K19.2</b>    | 28S ribosomal protein S17, mitochondrial [Source:uniprotkb/Swiss-Prot;Acc:Q9Y2R5]                              |   |
| <b>RP11-261P9.5</b>    | Syntaxin 16 isoform a variant [Source:uniprotkb/trembl;Acc:Q59G13]                                             |   |
| <b>RP11-352D3.2</b>    | Novel proteinuncharacterized protein [Source:uniprotkb/trembl;Acc:Q5VXX5]                                      |   |
| <b>RP11-389E17.1</b>   | HCG2025867Uncharacterized protein [Source:uniprotkb/trembl;Acc:C9JJG8]                                         |   |
| <b>RP11-392O18.1</b>   | Selenoprotein T [Source:uniprotkb/Swiss-Prot;Acc:P62341]                                                       |   |
| <b>RP11-428C6.1</b>    | Rho-guanine nucleotide exchange factor [Source:uniprotkb/Swiss-Prot;Acc:Q8N1W1]                                |   |
| <b>RP11-468E2.1</b>    | Transmembrane 9 superfamily member 1 isoform a [Source:refseq peptide;Acc:NP_006396]                           |   |
| <b>RP11-476E15.3</b>   | Novel protein (KIAA0894)Sorbin and SH3 domain containing 1, isoform CRA_e [Source:uniprotkb/trembl;Acc:Q5T925] |   |
| <b>RP11-631M21.2</b>   | Tubulin beta-8 chain [Source:uniprotkb/Swiss-Prot;Acc:Q3ZCM7]                                                  |   |

|                        |                                                                                                                            |  |
|------------------------|----------------------------------------------------------------------------------------------------------------------------|--|
| <b>RP11-723O4.6</b>    | Uncharacterized protein FLJ43738 [Source:uniprotkb/Swiss-Prot;Acc:Q6ZUG5]                                                  |  |
| <b>RP1-177G6.2</b>     | Novel protein [Source:uniprotkb/trembl;Acc:Q5JPA2]                                                                         |  |
| <b>RP11-783K16.10</b>  | Potassium channel subfamily K member 4 [Source:refseq peptide;Acc:NP_201567]                                               |  |
| <b>RP11-88G17.6</b>    | Novel protein similar to hemicentin (LOC392395) [Source:uniprotkb/trembl;Acc:A2A3K3]                                       |  |
| <b>RP13-347D8.6</b>    | Uncharacterized protein KIAA1210 [Source:uniprotkb/Swiss-Prot;Acc:Q9ULL0]                                                  |  |
| <b>RP3-377D14.1</b>    | Novel protein [Source:uniprotkb/trembl;Acc:A2BGT5]                                                                         |  |
| <b>RP3-402G11.5</b>    | Selenoprotein O [Source:uniprotkb/Swiss-Prot;Acc:Q9BVL4]                                                                   |  |
| <b>RP3-403A15.5</b>    | C6orf174 protein [Source:uniprotkb/trembl;Acc:A5PLQ8]                                                                      |  |
| <b>RP4-695O20_B.10</b> | Microrna let-7b (MIRLET7B), microrna [Source:refseq DNA;Acc:NR_029479]                                                     |  |
| <b>RP4-697K14.7</b>    | Peroxisomal proliferator-activated receptor A-interacting complex 285 kda protein [Source:uniprotkb/Swiss-Prot;Acc:Q9BYK8] |  |
| <b>RP4-788L13.1</b>    | Lipid phosphate phosphatase-related protein type 4 [Source:uniprotkb/Swiss-Prot;Acc:Q7Z2D5]                                |  |
| <b>RP5-860F19.6</b>    | Uncharacterized protein [Source:uniprotkb/trembl;Acc:D6RAZ5]                                                               |  |
| <b>RP5-862P8.2</b>     | Mitogen-activated protein kinase kinase kinase MLK4 [Source:uniprotkb/Swiss-Prot;Acc:Q5TCX8]                               |  |
| <b>RP5-877J2.1</b>     | Cdna FLJ51453, highly similar to Aquaporin-1 [Source:uniprotkb/trembl;Acc:B4E220]                                          |  |
| <b>RPAP1</b>           | RNA polymerase II associated protein 1 [Source:HGNC Symbol;Acc:24567]                                                      |  |
| <b>RPGRIP1</b>         | Retinitis pigmentosa gtpase regulator interacting protein 1 [Source:HGNC Symbol;Acc:13436]                                 |  |
| <b>RPGRIP1L</b>        | RPGRIP1-like [Source:HGNC Symbol;Acc:29168]                                                                                |  |
| <b>RPL13</b>           | Ribosomal protein L13 [Source:HGNC Symbol;Acc:10303]                                                                       |  |
| <b>RPL13A</b>          | Ribosomal protein L13a [Source:HGNC Symbol;Acc:10304]                                                                      |  |
| <b>RPL3</b>            | Ribosomal protein L3 [Source:HGNC Symbol;Acc:10332]                                                                        |  |
| <b>RPL31</b>           | Ribosomal protein L31 [Source:HGNC Symbol;Acc:10334]                                                                       |  |
| <b>RPL7L1</b>          | Ribosomal protein L7-like 1 [Source:HGNC Symbol;Acc:21370]                                                                 |  |

|                |                                                                                     |   |
|----------------|-------------------------------------------------------------------------------------|---|
| <b>RPN1</b>    | Ribophorin I                                                                        | √ |
| <b>RPN2</b>    | Ribophorin II [Source:HGNC Symbol;Acc:10382]                                        |   |
| <b>RPP14</b>   | Ribonuclease P/MRP 14kda subunit [Source:HGNC Symbol;Acc:30327]                     |   |
| <b>RPRD1A</b>  | Regulation of nuclear pre-mrna domain containing 1A [Source:HGNC Symbol;Acc:25560]  |   |
| <b>RPRD1B</b>  | Regulation of nuclear pre-mrna domain containing 1B [Source:HGNC Symbol;Acc:16209]  |   |
| <b>RPS21</b>   | Ribosomal protein S21 [Source:HGNC Symbol;Acc:10409]                                |   |
| <b>RPS27A</b>  | Ribosomal protein S27a [Source:HGNC Symbol;Acc:10417]                               |   |
| <b>RPS6</b>    | Ribosomal protein S6 [Source:HGNC Symbol;Acc:10429]                                 |   |
| <b>RPS6KA3</b> | Ribosomal protein S6 kinase, 90kda, polypeptide 3 [Source:HGNC Symbol;Acc:10432]    |   |
| <b>RPS6KA4</b> | Ribosomal protein S6 kinase, 90kda, polypeptide 4 [Source:HGNC Symbol;Acc:10433]    |   |
| <b>RPS6KA5</b> | Ribosomal protein S6 kinase, 90kda, polypeptide 5 [Source:HGNC Symbol;Acc:10434]    |   |
| <b>RPS6KB1</b> | Ribosomal protein S6 kinase, 70kda, polypeptide 1 [Source:HGNC Symbol;Acc:10436]    |   |
| <b>RPS6KL1</b> | Ribosomal protein S6 kinase-like 1 [Source:HGNC Symbol;Acc:20222]                   |   |
| <b>RPS7</b>    | Ribosomal protein S7 [Source:HGNC Symbol;Acc:10440]                                 |   |
| <b>RPS8</b>    | Ribosomal protein S8 [Source:HGNC Symbol;Acc:10441]                                 |   |
| <b>RRAGB</b>   | Ras-related GTP binding B [Source:HGNC Symbol;Acc:19901]                            |   |
| <b>RRBP1</b>   | Ribosome binding protein 1 homolog 180kda (dog) [Source:HGNC Symbol;Acc:10448]      |   |
| <b>RREB1</b>   | Ras responsive element binding protein 1 [Source:HGNC Symbol;Acc:10449]             |   |
| <b>RRH</b>     | Retinal pigment epithelium-derived rhodopsin homolog [Source:HGNC Symbol;Acc:10450] |   |
| <b>RRM2B</b>   | Ribonucleotide reductase M2 B (TP53 inducible) [Source:HGNC Symbol;Acc:17296]       |   |
| <b>RRP15</b>   | Ribosomal RNA processing 15 homolog (S. Cerevisiae) [Source:HGNC Symbol;Acc:24255]  |   |

|                 |                                                                                                                      |  |
|-----------------|----------------------------------------------------------------------------------------------------------------------|--|
| <b>RRP8</b>     | Ribosomal RNA processing 8, methyltransferase, homolog (yeast)<br>[Source:HGNC Symbol;Acc:29030]                     |  |
| <b>RRP9</b>     | Ribosomal RNA processing 9, small subunit (SSU) processome component, homolog (yeast) [Source:HGNC Symbol;Acc:16829] |  |
| <b>RS1</b>      | Retinoschisin 1 [Source:HGNC Symbol;Acc:10457]                                                                       |  |
| <b>RSC1A1</b>   | Regulatory solute carrier protein, family 1, member 1 [Source:HGNC Symbol;Acc:10458]                                 |  |
| <b>RSF1</b>     | Remodeling and spacing factor 1 [Source:HGNC Symbol;Acc:18118]                                                       |  |
| <b>RSPH10B2</b> | Radial spoke head 10 homolog B2 (Chlamydomonas) [Source:HGNC Symbol;Acc:34385]                                       |  |
| <b>RSPH9</b>    | Radial spoke head 9 homolog (Chlamydomonas) [Source:HGNC Symbol;Acc:21057]                                           |  |
| <b>RSPRY1</b>   | Ring finger and SPRY domain containing 1 [Source:HGNC Symbol;Acc:29420]                                              |  |
| <b>RSRC2</b>    | Arginine/serine-rich coiled-coil 2 [Source:HGNC Symbol;Acc:30559]                                                    |  |
| <b>RSU1</b>     | Ras suppressor protein 1 [Source:HGNC Symbol;Acc:10464]                                                              |  |
| <b>RTCD1</b>    | RNA terminal phosphate cyclase domain 1 [Source:HGNC Symbol;Acc:17981]                                               |  |
| <b>RTEL1</b>    | Regulator of telomere elongation helicase 1 [Source:HGNC Symbol;Acc:15888]                                           |  |
| <b>RTF1</b>     | Rtf1, Paf1/RNA polymerase II complex component, homolog (S. Cerevisiae)<br>[Source:HGNC Symbol;Acc:28996]            |  |
| <b>RTKN</b>     | Rhotekin [Source:HGNC Symbol;Acc:10466]                                                                              |  |
| <b>RTKN2</b>    | Rhotekin 2 [Source:HGNC Symbol;Acc:19364]                                                                            |  |
| <b>RTN1</b>     | Reticulon 1 [Source:HGNC Symbol;Acc:10467]                                                                           |  |
| <b>RTN4</b>     | Reticulon 4 [Source:HGNC Symbol;Acc:14085]                                                                           |  |
| <b>RTN4R</b>    | Reticulon 4 receptor [Source:HGNC Symbol;Acc:18601]                                                                  |  |
| <b>RTN4RL1</b>  | Reticulon 4 receptor-like 1 [Source:HGNC Symbol;Acc:21329]                                                           |  |
| <b>RTP4</b>     | Receptor (chemosensory) transporter protein 4 [Source:HGNC Symbol;Acc:23992]                                         |  |
| <b>RUFY3</b>    | RUN and FYVE domain containing 3 [Source:HGNC Symbol;Acc:30285]                                                      |  |
| <b>RUNX1T1</b>  | Runt-related transcription factor 1; translocated to, 1 (cyclin D-related)<br>[Source:HGNC Symbol;Acc:1535]          |  |

|                |                                                                               |  |
|----------------|-------------------------------------------------------------------------------|--|
| <b>RUSC1</b>   | RUN and SH3 domain containing 1 [Source:HGNC Symbol;Acc:17153]                |  |
| <b>RUSC2</b>   | RUN and SH3 domain containing 2 [Source:HGNC Symbol;Acc:23625]                |  |
| <b>RWDD2B</b>  | RWD domain containing 2B [Source:HGNC Symbol;Acc:1302]                        |  |
| <b>RWDD3</b>   | RWD domain containing 3 [Source:HGNC Symbol;Acc:21393]                        |  |
| <b>RWDD4</b>   | RWD domain containing 4 [Source:HGNC Symbol;Acc:23750]                        |  |
| <b>RXFP1</b>   | Relaxin/insulin-like family peptide receptor 1 [Source:HGNC Symbol;Acc:19718] |  |
| <b>RXFP2</b>   | Relaxin/insulin-like family peptide receptor 2 [Source:HGNC Symbol;Acc:17318] |  |
| <b>RXFP3</b>   | Relaxin/insulin-like family peptide receptor 3 [Source:HGNC Symbol;Acc:24883] |  |
| <b>RXRA</b>    | Retinoid X receptor, alpha [Source:HGNC Symbol;Acc:10477]                     |  |
| <b>RXRB</b>    | Retinoid X receptor, beta [Source:HGNC Symbol;Acc:10478]                      |  |
| <b>RYR1</b>    | Ryanodine receptor 1 (skeletal) [Source:HGNC Symbol;Acc:10483]                |  |
| <b>RYR2</b>    | Ryanodine receptor 2 (cardiac) [Source:HGNC Symbol;Acc:10484]                 |  |
| <b>RYR3</b>    | Ryanodine receptor 3 [Source:HGNC Symbol;Acc:10485]                           |  |
| <b>S100A1</b>  | S100 calcium binding protein A1 [Source:HGNC Symbol;Acc:10486]                |  |
| <b>S100A2</b>  | S100 calcium binding protein A2 [Source:HGNC Symbol;Acc:10492]                |  |
| <b>S100A7A</b> | S100 calcium binding protein A7A [Source:HGNC Symbol;Acc:21657]               |  |
| <b>S100BP</b>  | S100P binding protein [Source:HGNC Symbol;Acc:25768]                          |  |
| <b>S1PR3</b>   | Sphingosine-1-phosphate receptor 3 [Source:HGNC Symbol;Acc:3167]              |  |
| <b>S1PR5</b>   | Sphingosine-1-phosphate receptor 5 [Source:HGNC Symbol;Acc:14299]             |  |
| <b>SACS</b>    | Spastic ataxia of Charlevoix-Saguenay (sacsin) [Source:HGNC Symbol;Acc:10519] |  |
| <b>SAE1</b>    | SUMO1 activating enzyme subunit 1 [Source:HGNC Symbol;Acc:30660]              |  |
| <b>SAGE1</b>   | Sarcoma antigen 1 [Source:HGNC Symbol;Acc:30369]                              |  |
| <b>SALL4</b>   | Sal-like 4 (Drosophila) [Source:HGNC Symbol;Acc:15924]                        |  |
| <b>SAMD10</b>  | Sterile alpha motif domain containing 10 [Source:HGNC Symbol;Acc:16129]       |  |
| <b>SAMD14</b>  | Sterile alpha motif domain containing 14 [Source:HGNC Symbol;Acc:27312]       |  |
| <b>SAMD4A</b>  | Sterile alpha motif domain containing 4A [Source:HGNC Symbol;Acc:23023]       |  |

|                |                                                                                                    |   |
|----------------|----------------------------------------------------------------------------------------------------|---|
| <b>SAMD5</b>   | Sterile alpha motif domain containing 5 [Source:HGNC Symbol;Acc:21180]                             |   |
| <b>SAMD7</b>   | Sterile alpha motif domain containing 7 [Source:HGNC Symbol;Acc:25394]                             |   |
| <b>SAMD9L</b>  | Sterile alpha motif domain containing 9-like [Source:HGNC Symbol;Acc:1349]                         |   |
| <b>SAMM50</b>  | Sorting and assembly machinery component 50 homolog (S. Cerevisiae) [Source:HGNC Symbol;Acc:24276] |   |
| <b>SAP130</b>  | Sin3A-associated protein, 130kda [Source:HGNC Symbol;Acc:29813]                                    |   |
| <b>SAP30BP</b> | SAP30 binding protein [Source:HGNC Symbol;Acc:30785]                                               |   |
| <b>SAP30L</b>  | SAP30-like [Source:HGNC Symbol;Acc:25663]                                                          |   |
| <b>SAR1A</b>   | SAR1 homolog A (S. Cerevisiae) [Source:HGNC Symbol;Acc:10534]                                      |   |
| <b>SAR1B</b>   | SAR1 homolog B (S. Cerevisiae) [Source:HGNC Symbol;Acc:10535]                                      |   |
| <b>SARNP</b>   | SAP domain containing ribonucleoprotein [Source:HGNC Symbol;Acc:24432]                             |   |
| <b>SASH1</b>   | SAM and SH3 domain containing 1 [Source:HGNC Symbol;Acc:19182]                                     |   |
| <b>SATB1</b>   | SATB homeobox 1 [Source:HGNC Symbol;Acc:10541]                                                     |   |
| <b>SATB2</b>   | SATB homeobox 2 [Source:HGNC Symbol;Acc:21637]                                                     |   |
| <b>SBDS</b>    | Shwachman-Bodian-Diamond syndrome                                                                  | √ |
| <b>SBNO1</b>   | Strawberry notch homolog 1 (Drosophila) [Source:HGNC Symbol;Acc:22973]                             |   |
| <b>SC4MOL</b>  | Sterol-C4-methyl oxidase-like [Source:HGNC Symbol;Acc:10545]                                       |   |
| <b>SCAF8</b>   | SR-related CTD-associated factor 8 [Source:HGNC Symbol;Acc:20959]                                  |   |
| <b>SCAMP4</b>  | Secretory carrier membrane protein 4 [Source:HGNC Symbol;Acc:30385]                                |   |
| <b>SCAMP5</b>  | Secretory carrier membrane protein 5 [Source:HGNC Symbol;Acc:30386]                                |   |
| <b>SCAND3</b>  | SCAN domain containing 3 [Source:HGNC Symbol;Acc:13851]                                            |   |
| <b>SCAP</b>    | SREBF chaperone [Source:HGNC Symbol;Acc:30634]                                                     |   |
| <b>SCAPER</b>  | S-phase cyclin A-associated protein in the ER [Source:HGNC Symbol;Acc:13081]                       |   |
| <b>SCARB2</b>  | Scavenger receptor class B, member 2 [Source:HGNC Symbol;Acc:1665]                                 |   |
| <b>SCD</b>     | Stearoyl-coa desaturase (delta-9-desaturase) [Source:HGNC Symbol;Acc:10571]                        |   |
| <b>SCEL</b>    | Sciellin [Source:HGNC Symbol;Acc:10573]                                                            |   |
| <b>SCG2</b>    | Secretogranin II [Source:HGNC Symbol;Acc:10575]                                                    |   |
| <b>SCIN</b>    | Scinderin [Source:HGNC Symbol;Acc:21695]                                                           |   |



|               |                                                                                        |   |
|---------------|----------------------------------------------------------------------------------------|---|
| <b>SCMH1</b>  | Sex comb on midleg homolog 1 (Drosophila) [Source:HGNC Symbol;Acc:19003]               |   |
| <b>SCML1</b>  | Sex comb on midleg-like 1 (Drosophila) [Source:HGNC Symbol;Acc:10580]                  |   |
| <b>SCML2</b>  | Sex comb on midleg-like 2 (Drosophila) [Source:HGNC Symbol;Acc:10581]                  |   |
| <b>SCML4</b>  | Sex comb on midleg-like 4 (Drosophila) [Source:HGNC Symbol;Acc:21397]                  |   |
| <b>SCN10A</b> | Sodium channel, voltage-gated, type X, alpha subunit [Source:HGNC Symbol;Acc:10582]    |   |
| <b>SCN2A</b>  | Sodium channel, voltage-gated, type II, alpha subunit [Source:HGNC Symbol;Acc:10588]   |   |
| <b>SCN3B</b>  | Sodium channel, voltage-gated, type III, beta [Source:HGNC Symbol;Acc:20665]           |   |
| <b>SCN4A</b>  | Sodium channel, voltage-gated, type IV, alpha subunit [Source:HGNC Symbol;Acc:10591]   |   |
| <b>SCN5A</b>  | Sodium channel, voltage-gated, type V, alpha subunit [Source:HGNC Symbol;Acc:10593]    |   |
| <b>SCN8A</b>  | Sodium channel, voltage gated, type VIII, alpha subunit [Source:HGNC Symbol;Acc:10596] |   |
| <b>SCP2</b>   | Sterol carrier protein 2 [Source:HGNC Symbol;Acc:10606]                                |   |
| <b>SCRG1</b>  | Stimulator of chondrogenesis 1 [Source:HGNC Symbol;Acc:17036]                          |   |
| <b>SCRN1</b>  | Secernin 1 [Source:HGNC Symbol;Acc:22192]                                              |   |
| <b>SCUBE1</b> | Signal peptide, CUB domain, EGF-like 1 [Source:HGNC Symbol;Acc:13441]                  |   |
| <b>SCUBE2</b> | Signal peptide, CUB domain, EGF-like 2 [Source:HGNC Symbol;Acc:30425]                  |   |
| <b>SCUBE3</b> | Signal peptide, CUB domain, EGF-like 3 [Source:HGNC Symbol;Acc:13655]                  |   |
| <b>SDAD1</b>  | SDA1 domain containing 1 [Source:HGNC Symbol;Acc:25537]                                |   |
| <b>SDC3</b>   | Syndecan 3 [Source:HGNC Symbol;Acc:10660]                                              |   |
| <b>SDC4</b>   | Syndecan 4                                                                             | √ |
| <b>SDCBP2</b> | Syndecan binding protein (syntenin) 2 [Source:HGNC Symbol;Acc:15756]                   |   |

|                 |                                                                                                                       |   |
|-----------------|-----------------------------------------------------------------------------------------------------------------------|---|
| <b>SDCCAG3</b>  | Serologically defined colon cancer antigen 3 [Source:HGNC Symbol;Acc:10667]                                           |   |
| <b>SDHAF2</b>   | Succinate dehydrogenase complex assembly factor 2 [Source:HGNC Symbol;Acc:26034]                                      |   |
| <b>SDHD</b>     | Succinate dehydrogenase complex, subunit D, integral membrane protein                                                 | √ |
| <b>SDK1</b>     | Sidekick homolog 1, cell adhesion molecule (chicken) [Source:HGNC Symbol;Acc:19307]                                   |   |
| <b>SDK2</b>     | Sidekick homolog 2 (chicken) [Source:HGNC Symbol;Acc:19308]                                                           |   |
| <b>SDR16C5</b>  | Short chain dehydrogenase/reductase family 16C, member 5 [Source:HGNC Symbol;Acc:30311]                               |   |
| <b>SEC14L4</b>  | SEC14-like 4 ( <i>S. Cerevisiae</i> )                                                                                 |   |
| <b>SEC14L5</b>  | SEC14-like 5 ( <i>S. Cerevisiae</i> )                                                                                 |   |
| <b>SEC16A</b>   | SEC16 homolog A ( <i>S. Cerevisiae</i> )                                                                              |   |
| <b>SEC22A</b>   | SEC22 vesicle trafficking protein homolog A ( <i>S. Cerevisiae</i> )                                                  |   |
| <b>SEC23A</b>   | Sec23 homolog A ( <i>S. Cerevisiae</i> )                                                                              |   |
| <b>SEC23B</b>   | Sec23 homolog B ( <i>S. Cerevisiae</i> )                                                                              |   |
| <b>SEC23IP</b>  | SEC23 interacting protein [Source:HGNC Symbol;Acc:17018]                                                              |   |
| <b>SEC24B</b>   | SEC24 family, member B ( <i>S. Cerevisiae</i> )                                                                       |   |
| <b>SEC24C</b>   | SEC24 family, member C ( <i>S. Cerevisiae</i> )                                                                       |   |
| <b>SEC24D</b>   | SEC24 family, member D ( <i>S. Cerevisiae</i> )                                                                       |   |
| <b>SEC31A</b>   | SEC31 homolog A ( <i>S. Cerevisiae</i> )                                                                              |   |
| <b>SEC61A2</b>  | Sec61 alpha 2 subunit ( <i>S. Cerevisiae</i> )                                                                        |   |
| <b>SEC63</b>    | SEC63 homolog ( <i>S. Cerevisiae</i> )                                                                                |   |
| <b>SECISBP2</b> | SECIS binding protein 2                                                                                               |   |
| <b>SEH1L</b>    | SEH1-like ( <i>S. Cerevisiae</i> )                                                                                    |   |
| <b>SEL1L</b>    | Sel-1 suppressor of lin-12-like ( <i>C. Elegans</i> )                                                                 |   |
| <b>SEL1L3</b>   | Sel-1 suppressor of lin-12-like 3 ( <i>C. Elegans</i> )                                                               |   |
| <b>SELE</b>     | Selectin E                                                                                                            |   |
| <b>SELENBP1</b> | Selenium binding protein 1 [Source:HGNC Symbol;Acc:10719]                                                             |   |
| <b>SELL</b>     | Selectin L [Source:HGNC Symbol;Acc:10720]                                                                             |   |
| <b>SEMA3A</b>   | Sema domain, immunoglobulin domain (Ig), short basic domain, secreted, (Semaphorin) 3A [Source:HGNC Symbol;Acc:10723] |   |

|                |                                                                                                                                                                            |  |
|----------------|----------------------------------------------------------------------------------------------------------------------------------------------------------------------------|--|
| <b>SEMA3C</b>  | Sema domain, immunoglobulin domain (Ig), short basic domain, secreted, (Semaphorin) 3C [Source:HGNC Symbol;Acc:10725]                                                      |  |
| <b>SEMA4A</b>  | Sema domain, immunoglobulin domain (Ig), transmembrane domain (TM) and short cytoplasmic domain, (Semaphorin) 4A [Source:HGNC Symbol;Acc:10729]                            |  |
| <b>SEMA4B</b>  | Sema domain, immunoglobulin domain (Ig), transmembrane domain (TM) and short cytoplasmic domain, (Semaphorin) 4B [Source:HGNC Symbol;Acc:10730]                            |  |
| <b>SEMA4C</b>  | Sema domain, immunoglobulin domain (Ig), transmembrane domain (TM) and short cytoplasmic domain, (Semaphorin) 4C [Source:HGNC Symbol;Acc:10731]                            |  |
| <b>SEMA4D</b>  | Sema domain, immunoglobulin domain (Ig), transmembrane domain (TM) and short cytoplasmic domain, (Semaphorin) 4D [Source:HGNC Symbol;Acc:10732]                            |  |
| <b>SEMA4F</b>  | Sema domain, immunoglobulin domain (Ig), transmembrane domain (TM) and short cytoplasmic domain, (Semaphorin) 4F [Source:HGNC Symbol;Acc:10734]                            |  |
| <b>SEMA5A</b>  | Sema domain, seven thrombospondin repeats (type 1 and type 1-like), transmembrane domain (TM) and short cytoplasmic domain, (Semaphorin) 5A [Source:HGNC Symbol;Acc:10736] |  |
| <b>SEMA6A</b>  | Sema domain, transmembrane domain (TM), and cytoplasmic domain, (Semaphorin) 6A [Source:HGNC Symbol;Acc:10738]                                                             |  |
| <b>SEMG2</b>   | Semenogelin II [Source:HGNC Symbol;Acc:10743]                                                                                                                              |  |
| <b>SENP5</b>   | SUMO1/sentrin specific peptidase 5 [Source:HGNC Symbol;Acc:28407]                                                                                                          |  |
| <b>SENP6</b>   | SUMO1/sentrin specific peptidase 6 [Source:HGNC Symbol;Acc:20944]                                                                                                          |  |
| <b>SENP7</b>   | SUMO1/sentrin specific peptidase 7 [Source:HGNC Symbol;Acc:30402]                                                                                                          |  |
| <b>SENP8</b>   | SUMO/sentrin specific peptidase family member 8 [Source:HGNC Symbol;Acc:22992]                                                                                             |  |
| <b>SEPHS1</b>  | Selenophosphate synthetase 1 [Source:HGNC Symbol;Acc:19685]                                                                                                                |  |
| <b>SEPN1</b>   | Selenoprotein N, 1 [Source:HGNC Symbol;Acc:15999]                                                                                                                          |  |
| <b>SEPSECS</b> | Sep (O-phosphoserine) trna:Sec (selenocysteine) trna synthase [Source:HGNC Symbol;Acc:30605]                                                                               |  |
| <b>SERBP1</b>  | SERPINE1 mrna binding protein 1 [Source:HGNC Symbol;Acc:17860]                                                                                                             |  |

|                  |                                                                                                                             |   |
|------------------|-----------------------------------------------------------------------------------------------------------------------------|---|
| <b>SERHL2</b>    | Serine hydrolase-like 2 [Source:HGNC Symbol;Acc:29446]                                                                      |   |
| <b>SERINC1</b>   | Serine incorporator 1 [Source:HGNC Symbol;Acc:13464]                                                                        |   |
| <b>SERPINA10</b> | Serpin peptidase inhibitor, clade A (alpha-1 antiproteinase, antitrypsin), member 10 [Source:HGNC Symbol;Acc:15996]         |   |
| <b>SERPINA5</b>  | Serpin peptidase inhibitor, clade A (alpha-1 antiproteinase, antitrypsin), member 5 [Source:HGNC Symbol;Acc:8723]           |   |
| <b>SERPINA7</b>  | Serpin peptidase inhibitor, clade A (alpha-1 antiproteinase, antitrypsin), member 7 [Source:HGNC Symbol;Acc:11583]          |   |
| <b>SERPINA9</b>  | Serpin peptidase inhibitor, clade A (alpha-1 antiproteinase, antitrypsin), member 9 [Source:HGNC Symbol;Acc:15995]          |   |
| <b>SERPINB1</b>  | Serpin peptidase inhibitor, clade B (ovalbumin), member 1 [Source:HGNC Symbol;Acc:3311]                                     |   |
| <b>SERPINB2</b>  | Serpin peptidase inhibitor, clade B (ovalbumin), member 2 [Source:HGNC Symbol;Acc:8584]                                     |   |
| <b>SERPINB5</b>  | Serpin peptidase inhibitor, clade B (ovalbumin), member 5 [Source:HGNC Symbol;Acc:8949]                                     |   |
| <b>SERPINB9</b>  | Serpin peptidase inhibitor, clade B (ovalbumin), member 9 [Source:HGNC Symbol;Acc:8955]                                     |   |
| <b>SERPINE1</b>  | Serpin peptidase inhibitor, clade E (nexin, plasminogen activator inhibitor type 1), member 1 [Source:HGNC Symbol;Acc:8583] |   |
| <b>SERPINE2</b>  | Serpin peptidase inhibitor, clade E (nexin, plasminogen activator inhibitor type 1), member 2 [Source:HGNC Symbol;Acc:8951] |   |
| <b>SERTAD2</b>   | SERTA domain containing 2 [Source:HGNC Symbol;Acc:30784]                                                                    |   |
| <b>SERTAD4</b>   | SERTA domain containing 4 [Source:HGNC Symbol;Acc:25236]                                                                    |   |
| <b>SESTD1</b>    | SEC14 and spectrin domains 1 [Source:HGNC Symbol;Acc:18379]                                                                 |   |
| <b>SETBP1</b>    | SET binding protein 1                                                                                                       | √ |
| <b>SETD1B</b>    | SET domain containing 1B [Source:HGNC Symbol;Acc:29187]                                                                     |   |
| <b>SETD2</b>     | SET domain containing 2                                                                                                     | √ |
| <b>SETD5</b>     | SET domain containing 5 [Source:HGNC Symbol;Acc:25566]                                                                      |   |
| <b>SETD7</b>     | SET domain containing (lysine methyltransferase) 7 [Source:HGNC Symbol;Acc:30412]                                           |   |
| <b>SETMAR</b>    | SET domain and mariner transposase fusion gene [Source:HGNC Symbol;Acc:10762]                                               |   |

|               |                                                                                                      |   |
|---------------|------------------------------------------------------------------------------------------------------|---|
| <b>SETX</b>   | Senataxin [Source:HGNC Symbol;Acc:445]                                                               |   |
| <b>SEZ6</b>   | Seizure related 6 homolog (mouse) [Source:HGNC Symbol;Acc:15955]                                     |   |
| <b>SF3A1</b>  | Splicing factor 3a, subunit 1, 120kda [Source:HGNC Symbol;Acc:10765]                                 |   |
| <b>SF3A3</b>  | Splicing factor 3a, subunit 3, 60kda [Source:HGNC Symbol;Acc:10767]                                  |   |
| <b>SF3B1</b>  | Splicing factor 3b, subunit 1, 155 kDa                                                               | √ |
| <b>SF3B4</b>  | Splicing factor 3b, subunit 4, 49kda [Source:HGNC Symbol;Acc:10771]                                  |   |
| <b>SFI1</b>   | Sfi1 homolog, spindle assembly associated (yeast) [Source:HGNC Symbol;Acc:29064]                     |   |
| <b>SFMBT2</b> | Scm-like with four mbt domains 2 [Source:HGNC Symbol;Acc:20256]                                      |   |
| <b>SFN</b>    | Stratifin [Source:HGNC Symbol;Acc:10773]                                                             |   |
| <b>SFPQ</b>   | Splicing factor proline/glutamine-rich                                                               | √ |
| <b>SFRP2</b>  | Secreted frizzled-related protein 2 [Source:HGNC Symbol;Acc:10777]                                   |   |
| <b>SFRP4</b>  | Secreted frizzled-related protein 4 [Source:HGNC Symbol;Acc:10778]                                   |   |
| <b>SFRS18</b> | Splicing factor, arginine/serine-rich 18 [Source:HGNC Symbol;Acc:21222]                              |   |
| <b>SFTPB</b>  | Surfactant protein B [Source:HGNC Symbol;Acc:10801]                                                  |   |
| <b>SFTPC</b>  | Surfactant protein C [Source:HGNC Symbol;Acc:10802]                                                  |   |
| <b>SFXN3</b>  | Sideroflexin 3 [Source:HGNC Symbol;Acc:16087]                                                        |   |
| <b>SGCD</b>   | Sarcoglycan, delta (35kda dystrophin-associated glycoprotein) [Source:HGNC Symbol;Acc:10807]         |   |
| <b>SGIP1</b>  | SH3-domain GRB2-like (endophilin) interacting protein 1 [Source:HGNC Symbol;Acc:25412]               |   |
| <b>SGK1</b>   | Serum/glucocorticoid regulated kinase 1 [Source:HGNC Symbol;Acc:10810]                               |   |
| <b>SGK2</b>   | Serum/glucocorticoid regulated kinase 2 [Source:HGNC Symbol;Acc:13900]                               |   |
| <b>SGMS1</b>  | Sphingomyelin synthase 1 [Source:HGNC Symbol;Acc:29799]                                              |   |
| <b>SGOL2</b>  | Shugoshin-like 2 (S. Pombe) [Source:HGNC Symbol;Acc:30812]                                           |   |
| <b>SGSM1</b>  | Small G protein signaling modulator 1 [Source:HGNC Symbol;Acc:29410]                                 |   |
| <b>SGSM3</b>  | Small G protein signaling modulator 3 [Source:HGNC Symbol;Acc:25228]                                 |   |
| <b>SGTA</b>   | Small glutamine-rich tetratricopeptide repeat (TPR)-containing, alpha [Source:HGNC Symbol;Acc:10819] |   |
| <b>SH2D1A</b> | SH2 domain containing 1A [Source:HGNC Symbol;Acc:10820]                                              |   |
| <b>SH2D3C</b> | SH2 domain containing 3C [Source:HGNC Symbol;Acc:16884]                                              |   |

|                 |                                                                                              |  |
|-----------------|----------------------------------------------------------------------------------------------|--|
| <b>SH3BP2</b>   | SH3-domain binding protein 2 [Source:HGNC Symbol;Acc:10825]                                  |  |
| <b>SH3D19</b>   | SH3 domain containing 19 [Source:HGNC Symbol;Acc:30418]                                      |  |
| <b>SH3D21</b>   | SH3 domain containing 21 [Source:HGNC Symbol;Acc:26236]                                      |  |
| <b>SH3GLB1</b>  | SH3-domain GRB2-like endophilin B1 [Source:HGNC Symbol;Acc:10833]                            |  |
| <b>SH3KBP1</b>  | SH3-domain kinase binding protein 1 [Source:HGNC Symbol;Acc:13867]                           |  |
| <b>SH3PXD2A</b> | SH3 and PX domains 2A [Source:HGNC Symbol;Acc:23664]                                         |  |
| <b>SH3PXD2B</b> | SH3 and PX domains 2B [Source:HGNC Symbol;Acc:29242]                                         |  |
| <b>SH3TC2</b>   | SH3 domain and tetratricopeptide repeats 2 [Source:HGNC Symbol;Acc:29427]                    |  |
| <b>SHANK1</b>   | SH3 and multiple ankyrin repeat domains 1 [Source:HGNC Symbol;Acc:15474]                     |  |
| <b>SHARPIN</b>  | SHANK-associated RH domain interactor [Source:HGNC Symbol;Acc:25321]                         |  |
| <b>SHC2</b>     | SHC (Src homology 2 domain containing) transforming protein 2 [Source:HGNC Symbol;Acc:29869] |  |
| <b>SHE</b>      | Src homology 2 domain containing E [Source:HGNC Symbol;Acc:27004]                            |  |
| <b>SHF</b>      | Src homology 2 domain containing F [Source:HGNC Symbol;Acc:25116]                            |  |
| <b>SHH</b>      | Sonic hedgehog [Source:HGNC Symbol;Acc:10848]                                                |  |
| <b>SHOC2</b>    | Soc-2 suppressor of clear homolog (C. Elegans) [Source:HGNC Symbol;Acc:15454]                |  |
| <b>SHPRH</b>    | SNF2 histone linker PHD RING helicase [Source:HGNC Symbol;Acc:19336]                         |  |
| <b>SHQ1</b>     | SHQ1 homolog (S. Cerevisiae) [Source:HGNC Symbol;Acc:25543]                                  |  |
| <b>SHROOM2</b>  | Shroom family member 2 [Source:HGNC Symbol;Acc:630]                                          |  |
| <b>SHROOM4</b>  | Shroom family member 4 [Source:HGNC Symbol;Acc:29215]                                        |  |
| <b>SIAE</b>     | Sialic acid acetyltransferase [Source:HGNC Symbol;Acc:18187]                                 |  |
| <b>SIAH2</b>    | Seven in absentia homolog 2 (Drosophila) [Source:HGNC Symbol;Acc:10858]                      |  |
| <b>SIDT1</b>    | SID1 transmembrane family, member 1 [Source:HGNC Symbol;Acc:25967]                           |  |
| <b>SIDT2</b>    | SID1 transmembrane family, member 2 [Source:HGNC Symbol;Acc:24272]                           |  |
| <b>SIGLEC1</b>  | Sialic acid binding Ig-like lectin 1, sialoadhesin [Source:HGNC Symbol;Acc:11127]            |  |
| <b>SIGLEC9</b>  | Sialic acid binding Ig-like lectin 9 [Source:HGNC Symbol;Acc:10878]                          |  |

|                |                                                                                                       |  |
|----------------|-------------------------------------------------------------------------------------------------------|--|
| <b>SIK1</b>    | Salt-inducible kinase 1 [Source:HGNC Symbol;Acc:11142]                                                |  |
| <b>SIK3</b>    | SIK family kinase 3 [Source:HGNC Symbol;Acc:29165]                                                    |  |
| <b>SIKE1</b>   | Suppressor of IKBKE 1 [Source:HGNC Symbol;Acc:26119]                                                  |  |
| <b>SIL1</b>    | SIL1 homolog, endoplasmic reticulum chaperone ( <i>S. Cerevisiae</i> ) [Source:HGNC Symbol;Acc:24624] |  |
| <b>SIM1</b>    | Single-minded homolog 1 ( <i>Drosophila</i> ) [Source:HGNC Symbol;Acc:10882]                          |  |
| <b>SIM2</b>    | Single-minded homolog 2 ( <i>Drosophila</i> ) [Source:HGNC Symbol;Acc:10883]                          |  |
| <b>SIN3A</b>   | SIN3 homolog A, transcription regulator (yeast) [Source:HGNC Symbol;Acc:19353]                        |  |
| <b>SIPA1</b>   | Signal-induced proliferation-associated 1 [Source:HGNC Symbol;Acc:10885]                              |  |
| <b>SIPA1L1</b> | Signal-induced proliferation-associated 1 like 1 [Source:HGNC Symbol;Acc:20284]                       |  |
| <b>SIPA1L2</b> | Signal-induced proliferation-associated 1 like 2 [Source:HGNC Symbol;Acc:23800]                       |  |
| <b>SIPA1L3</b> | Signal-induced proliferation-associated 1 like 3 [Source:HGNC Symbol;Acc:23801]                       |  |
| <b>SIRPB1</b>  | Signal-regulatory protein beta 1 [Source:HGNC Symbol;Acc:15928]                                       |  |
| <b>SIRPD</b>   | Signal-regulatory protein delta [Source:HGNC Symbol;Acc:16248]                                        |  |
| <b>SIRT5</b>   | Sirtuin 5 [Source:HGNC Symbol;Acc:14933]                                                              |  |
| <b>SIT1</b>    | Signaling threshold regulating transmembrane adaptor 1 [Source:HGNC Symbol;Acc:17710]                 |  |
| <b>SIVA1</b>   | SIVA1, apoptosis-inducing factor [Source:HGNC Symbol;Acc:17712]                                       |  |
| <b>SIX3</b>    | SIX homeobox 3 [Source:HGNC Symbol;Acc:10889]                                                         |  |
| <b>SIX4</b>    | SIX homeobox 4 [Source:HGNC Symbol;Acc:10890]                                                         |  |
| <b>SIX6</b>    | SIX homeobox 6 [Source:HGNC Symbol;Acc:10892]                                                         |  |
| <b>SKA2</b>    | Spindle and kinetochore associated complex subunit 2 [Source:HGNC Symbol;Acc:28006]                   |  |
| <b>SKAP2</b>   | Src kinase associated phosphoprotein 2 [Source:HGNC Symbol;Acc:15687]                                 |  |
| <b>SKIV2L</b>  | Superkiller viralicidic activity 2-like ( <i>S. Cerevisiae</i> ) [Source:HGNC Symbol;Acc:10898]       |  |

|                 |                                                                                                           |  |
|-----------------|-----------------------------------------------------------------------------------------------------------|--|
| <b>SKIV2L2</b>  | Superkiller viralicidic activity 2-like 2 ( <i>S. Cerevisiae</i> ) [Source:HGNC Symbol;Acc:18734]         |  |
| <b>SKP1</b>     | S-phase kinase-associated protein 1 [Source:HGNC Symbol;Acc:10899]                                        |  |
| <b>SLAIN2</b>   | SLAIN motif family, member 2 [Source:HGNC Symbol;Acc:29282]                                               |  |
| <b>SLAMF1</b>   | Signaling lymphocytic activation molecule family member 1 [Source:HGNC Symbol;Acc:10903]                  |  |
| <b>SLC10A3</b>  | Solute carrier family 10 (sodium/bile acid cotransporter family), member 3 [Source:HGNC Symbol;Acc:22979] |  |
| <b>SLC10A5</b>  | Solute carrier family 10 (sodium/bile acid cotransporter family), member 5 [Source:HGNC Symbol;Acc:22981] |  |
| <b>SLC10A7</b>  | Solute carrier family 10 (sodium/bile acid cotransporter family), member 7 [Source:HGNC Symbol;Acc:23088] |  |
| <b>SLC12A4</b>  | Solute carrier family 12 (potassium/chloride transporters), member 4 [Source:HGNC Symbol;Acc:10913]       |  |
| <b>SLC12A5</b>  | Solute carrier family 12 (potassium/chloride transporter), member 5 [Source:HGNC Symbol;Acc:13818]        |  |
| <b>SLC12A6</b>  | Solute carrier family 12 (potassium/chloride transporters), member 6 [Source:HGNC Symbol;Acc:10914]       |  |
| <b>SLC15A1</b>  | Solute carrier family 15 (oligopeptide transporter), member 1 [Source:HGNC Symbol;Acc:10920]              |  |
| <b>SLC15A3</b>  | Solute carrier family 15, member 3 [Source:HGNC Symbol;Acc:18068]                                         |  |
| <b>SLC16A1</b>  | Solute carrier family 16, member 1 (monocarboxylic acid transporter 1) [Source:HGNC Symbol;Acc:10922]     |  |
| <b>SLC16A12</b> | Solute carrier family 16, member 12 (monocarboxylic acid transporter 12) [Source:HGNC Symbol;Acc:23094]   |  |
| <b>SLC16A14</b> | Solute carrier family 16, member 14 (monocarboxylic acid transporter 14) [Source:HGNC Symbol;Acc:26417]   |  |
| <b>SLC16A3</b>  | Solute carrier family 16, member 3 (monocarboxylic acid transporter 4) [Source:HGNC Symbol;Acc:10924]     |  |
| <b>SLC16A5</b>  | Solute carrier family 16, member 5 (monocarboxylic acid transporter 6) [Source:HGNC Symbol;Acc:10926]     |  |
| <b>SLC16A6</b>  | Solute carrier family 16, member 6 (monocarboxylic acid transporter 7) [Source:HGNC Symbol;Acc:10927]     |  |



|                 |                                                                                                                                           |  |
|-----------------|-------------------------------------------------------------------------------------------------------------------------------------------|--|
| <b>SLC16A7</b>  | Solute carrier family 16, member 7 (monocarboxylic acid transporter 2)<br>[Source:HGNC Symbol;Acc:10928]                                  |  |
| <b>SLC16A8</b>  | Solute carrier family 16, member 8 (monocarboxylic acid transporter 3)<br>[Source:HGNC Symbol;Acc:16270]                                  |  |
| <b>SLC17A6</b>  | Solute carrier family 17 (sodium-dependent inorganic phosphate cotransporter),<br>member 6 [Source:HGNC Symbol;Acc:16703]                 |  |
| <b>SLC17A8</b>  | Solute carrier family 17 (sodium-dependent inorganic phosphate cotransporter),<br>member 8 [Source:HGNC Symbol;Acc:20151]                 |  |
| <b>SLC18A1</b>  | Solute carrier family 18 (vesicular monoamine), member 1 [Source:HGNC<br>Symbol;Acc:10934]                                                |  |
| <b>SLC18A2</b>  | Solute carrier family 18 (vesicular monoamine), member 2 [Source:HGNC<br>Symbol;Acc:10935]                                                |  |
| <b>SLC19A1</b>  | Solute carrier family 19 (folate transporter), member 1 [Source:HGNC<br>Symbol;Acc:10937]                                                 |  |
| <b>SLC19A2</b>  | Solute carrier family 19 (thiamine transporter), member 2 [Source:HGNC<br>Symbol;Acc:10938]                                               |  |
| <b>SLC1A1</b>   | Solute carrier family 1 (neuronal/epithelial high affinity glutamate transporter,<br>system Xag), member 1 [Source:HGNC Symbol;Acc:10939] |  |
| <b>SLC1A2</b>   | Solute carrier family 1 (glial high affinity glutamate transporter), member 2<br>[Source:HGNC Symbol;Acc:10940]                           |  |
| <b>SLC1A4</b>   | Solute carrier family 1 (glutamate/neutral amino acid transporter), member 4<br>[Source:HGNC Symbol;Acc:10942]                            |  |
| <b>SLC1A6</b>   | Solute carrier family 1 (high affinity aspartate/glutamate transporter), member 6<br>[Source:HGNC Symbol;Acc:10944]                       |  |
| <b>SLC1A7</b>   | Solute carrier family 1 (glutamate transporter), member 7 [Source:HGNC<br>Symbol;Acc:10945]                                               |  |
| <b>SLC20A2</b>  | Solute carrier family 20 (phosphate transporter), member 2 [Source:HGNC<br>Symbol;Acc:10947]                                              |  |
| <b>SLC22A11</b> | Solute carrier family 22 (organic anion/urate transporter), member 11<br>[Source:HGNC Symbol;Acc:18120]                                   |  |
| <b>SLC22A12</b> | Solute carrier family 22 (organic anion/urate transporter), member 12<br>[Source:HGNC Symbol;Acc:17989]                                   |  |

|                 |                                                                                                                                 |  |
|-----------------|---------------------------------------------------------------------------------------------------------------------------------|--|
| <b>SLC22A13</b> | Solute carrier family 22 (organic anion transporter), member 13 [Source:HGNC Symbol;Acc:8494]                                   |  |
| <b>SLC22A15</b> | Solute carrier family 22, member 15 [Source:HGNC Symbol;Acc:20301]                                                              |  |
| <b>SLC22A16</b> | Solute carrier family 22 (organic cation/carnitine transporter), member 16 [Source:HGNC Symbol;Acc:20302]                       |  |
| <b>SLC22A18</b> | Solute carrier family 22, member 18 [Source:HGNC Symbol;Acc:10964]                                                              |  |
| <b>SLC22A2</b>  | Solute carrier family 22 (organic cation transporter), member 2 [Source:HGNC Symbol;Acc:10966]                                  |  |
| <b>SLC22A23</b> | Solute carrier family 22, member 23 [Source:HGNC Symbol;Acc:21106]                                                              |  |
| <b>SLC22A25</b> | Solute carrier family 22, member 25 [Source:HGNC Symbol;Acc:32935]                                                              |  |
| <b>SLC22A3</b>  | Solute carrier family 22 (extraneuronal monoamine transporter), member 3 [Source:HGNC Symbol;Acc:10967]                         |  |
| <b>SLC22A7</b>  | Solute carrier family 22 (organic anion transporter), member 7 [Source:HGNC Symbol;Acc:10971]                                   |  |
| <b>SLC22A8</b>  | Solute carrier family 22 (organic anion transporter), member 8 [Source:HGNC Symbol;Acc:10972]                                   |  |
| <b>SLC23A1</b>  | Solute carrier family 23 (nucleobase transporters), member 1 [Source:HGNC Symbol;Acc:10974]                                     |  |
| <b>SLC23A2</b>  | Solute carrier family 23 (nucleobase transporters), member 2 [Source:HGNC Symbol;Acc:10973]                                     |  |
| <b>SLC24A1</b>  | Solute carrier family 24 (sodium/potassium/calcium exchanger), member 1 [Source:HGNC Symbol;Acc:10975]                          |  |
| <b>SLC24A3</b>  | Solute carrier family 24 (sodium/potassium/calcium exchanger), member 3 [Source:HGNC Symbol;Acc:10977]                          |  |
| <b>SLC24A4</b>  | Solute carrier family 24 (sodium/potassium/calcium exchanger), member 4 [Source:HGNC Symbol;Acc:10978]                          |  |
| <b>SLC25A12</b> | Solute carrier family 25 (mitochondrial carrier, Aralar), member 12 [Source:HGNC Symbol;Acc:10982]                              |  |
| <b>SLC25A14</b> | Solute carrier family 25 (mitochondrial carrier, brain), member 14 [Source:HGNC Symbol;Acc:10984]                               |  |
| <b>SLC25A17</b> | Solute carrier family 25 (mitochondrial carrier; peroxisomal membrane protein, 34kda), member 17 [Source:HGNC Symbol;Acc:10987] |  |

|                 |                                                                                                                   |  |
|-----------------|-------------------------------------------------------------------------------------------------------------------|--|
| <b>SLC25A19</b> | Solute carrier family 25 (mitochondrial thiamine pyrophosphate carrier), member 19 [Source:HGNC Symbol;Acc:14409] |  |
| <b>SLC25A25</b> | Solute carrier family 25 (mitochondrial carrier; phosphate carrier), member 25 [Source:HGNC Symbol;Acc:20663]     |  |
| <b>SLC25A29</b> | Solute carrier family 25, member 29 [Source:HGNC Symbol;Acc:20116]                                                |  |
| <b>SLC25A3</b>  | Solute carrier family 25 (mitochondrial carrier; phosphate carrier), member 3 [Source:HGNC Symbol;Acc:10989]      |  |
| <b>SLC25A30</b> | Solute carrier family 25, member 30 [Source:HGNC Symbol;Acc:27371]                                                |  |
| <b>SLC25A32</b> | Solute carrier family 25, member 32 [Source:HGNC Symbol;Acc:29683]                                                |  |
| <b>SLC25A37</b> | Solute carrier family 25, member 37 [Source:HGNC Symbol;Acc:29786]                                                |  |
| <b>SLC25A38</b> | Solute carrier family 25, member 38 [Source:HGNC Symbol;Acc:26054]                                                |  |
| <b>SLC25A40</b> | Solute carrier family 25, member 40 [Source:HGNC Symbol;Acc:29680]                                                |  |
| <b>SLC25A48</b> | Solute carrier family 25, member 48 [Source:HGNC Symbol;Acc:30451]                                                |  |
| <b>SLC26A1</b>  | Solute carrier family 26 (sulfate transporter), member 1 [Source:HGNC Symbol;Acc:10993]                           |  |
| <b>SLC26A10</b> | Solute carrier family 26, member 10 [Source:HGNC Symbol;Acc:14470]                                                |  |
| <b>SLC26A11</b> | Solute carrier family 26, member 11 [Source:HGNC Symbol;Acc:14471]                                                |  |
| <b>SLC26A2</b>  | Solute carrier family 26 (sulfate transporter), member 2 [Source:HGNC Symbol;Acc:10994]                           |  |
| <b>SLC26A4</b>  | Solute carrier family 26, member 4 [Source:HGNC Symbol;Acc:8818]                                                  |  |
| <b>SLC27A4</b>  | Solute carrier family 27 (fatty acid transporter), member 4 [Source:HGNC Symbol;Acc:10998]                        |  |
| <b>SLC29A2</b>  | Solute carrier family 29 (nucleoside transporters), member 2 [Source:HGNC Symbol;Acc:11004]                       |  |
| <b>SLC29A3</b>  | Solute carrier family 29 (nucleoside transporters), member 3 [Source:HGNC Symbol;Acc:23096]                       |  |
| <b>SLC2A1</b>   | Solute carrier family 2 (facilitated glucose transporter), member 1 [Source:HGNC Symbol;Acc:11005]                |  |
| <b>SLC2A13</b>  | Solute carrier family 2 (facilitated glucose transporter), member 13 [Source:HGNC Symbol;Acc:15956]               |  |
| <b>SLC2A2</b>   | Solute carrier family 2 (facilitated glucose transporter), member 2 [Source:HGNC Symbol;Acc:11006]                |  |
| <b>SLC2A4RG</b> | SLC2A4 regulator [Source:HGNC Symbol;Acc:15930]                                                                   |  |

|                 |                                                                                                                                     |  |
|-----------------|-------------------------------------------------------------------------------------------------------------------------------------|--|
| <b>SLC30A1</b>  | Solute carrier family 30 (zinc transporter), member 1 [Source:HGNC Symbol;Acc:11012]                                                |  |
| <b>SLC30A4</b>  | Solute carrier family 30 (zinc transporter), member 4 [Source:HGNC Symbol;Acc:11015]                                                |  |
| <b>SLC30A9</b>  | Solute carrier family 30 (zinc transporter), member 9 [Source:HGNC Symbol;Acc:1329]                                                 |  |
| <b>SLC34A1</b>  | Solute carrier family 34 (sodium phosphate), member 1 [Source:HGNC Symbol;Acc:11019]                                                |  |
| <b>SLC35A1</b>  | Solute carrier family 35 (CMP-sialic acid transporter), member A1 [Source:HGNC Symbol;Acc:11021]                                    |  |
| <b>SLC35A3</b>  | Solute carrier family 35 (UDP-N-acetylglucosamine (UDP-glcnac) transporter), member A3 [Source:HGNC Symbol;Acc:11023]               |  |
| <b>SLC35A4</b>  | Solute carrier family 35, member A4 [Source:HGNC Symbol;Acc:20753]                                                                  |  |
| <b>SLC35B1</b>  | Solute carrier family 35, member B1 [Source:HGNC Symbol;Acc:20798]                                                                  |  |
| <b>SLC35B3</b>  | Solute carrier family 35, member B3 [Source:HGNC Symbol;Acc:21601]                                                                  |  |
| <b>SLC35B4</b>  | Solute carrier family 35, member B4 [Source:HGNC Symbol;Acc:20584]                                                                  |  |
| <b>SLC35C2</b>  | Solute carrier family 35, member C2 [Source:HGNC Symbol;Acc:17117]                                                                  |  |
| <b>SLC35D1</b>  | Solute carrier family 35 (UDP-glucuronic acid/UDP-N-acetylgalactosamine dual transporter), member D1 [Source:HGNC Symbol;Acc:20800] |  |
| <b>SLC35D2</b>  | Solute carrier family 35, member D2 [Source:HGNC Symbol;Acc:20799]                                                                  |  |
| <b>SLC35D3</b>  | Solute carrier family 35, member D3 [Source:HGNC Symbol;Acc:15621]                                                                  |  |
| <b>SLC35E1</b>  | Solute carrier family 35, member E1 [Source:HGNC Symbol;Acc:20803]                                                                  |  |
| <b>SLC35E2</b>  | Solute carrier family 35, member E2 [Source:HGNC Symbol;Acc:20863]                                                                  |  |
| <b>SLC35E2B</b> | Solute carrier family 35, member E2B [Source:HGNC Symbol;Acc:33941]                                                                 |  |
| <b>SLC35F1</b>  | Solute carrier family 35, member F1 [Source:HGNC Symbol;Acc:21483]                                                                  |  |
| <b>SLC36A1</b>  | Solute carrier family 36 (proton/amino acid symporter), member 1 [Source:HGNC Symbol;Acc:18761]                                     |  |
| <b>SLC36A4</b>  | Solute carrier family 36 (proton/amino acid symporter), member 4 [Source:HGNC Symbol;Acc:19660]                                     |  |
| <b>SLC37A1</b>  | Solute carrier family 37 (glycerol-3-phosphate transporter), member 1 [Source:HGNC Symbol;Acc:11024]                                |  |
| <b>SLC37A3</b>  | Solute carrier family 37 (glycerol-3-phosphate transporter), member 3 [Source:HGNC Symbol;Acc:20651]                                |  |

|                 |                                                                                                                                                                                         |   |
|-----------------|-----------------------------------------------------------------------------------------------------------------------------------------------------------------------------------------|---|
| <b>SLC38A1</b>  | Solute carrier family 38, member 1 [Source:HGNC Symbol;Acc:13447]                                                                                                                       |   |
| <b>SLC38A10</b> | Solute carrier family 38, member 10 [Source:HGNC Symbol;Acc:28237]                                                                                                                      |   |
| <b>SLC38A2</b>  | Solute carrier family 38, member 2 [Source:HGNC Symbol;Acc:13448]                                                                                                                       |   |
| <b>SLC38A4</b>  | Solute carrier family 38, member 4 [Source:HGNC Symbol;Acc:14679]                                                                                                                       |   |
| <b>SLC38A6</b>  | Solute carrier family 38, member 6 [Source:HGNC Symbol;Acc:19863]                                                                                                                       |   |
| <b>SLC38A7</b>  | Solute carrier family 38, member 7 [Source:HGNC Symbol;Acc:25582]                                                                                                                       |   |
| <b>SLC39A10</b> | Solute carrier family 39 (zinc transporter), member 10 [Source:HGNC Symbol;Acc:20861]                                                                                                   |   |
| <b>SLC39A13</b> | Solute carrier family 39 (zinc transporter), member 13 [Source:HGNC Symbol;Acc:20859]                                                                                                   |   |
| <b>SLC39A14</b> | Solute carrier family 39 (zinc transporter), member 14 [Source:HGNC Symbol;Acc:20858]                                                                                                   |   |
| <b>SLC39A2</b>  | Solute carrier family 39 (zinc transporter), member 2 [Source:HGNC Symbol;Acc:17127]                                                                                                    |   |
| <b>SLC39A3</b>  | Solute carrier family 39 (zinc transporter), member 3 [Source:HGNC Symbol;Acc:17128]                                                                                                    |   |
| <b>SLC39A4</b>  | Solute carrier family 39 (zinc transporter), member 4 [Source:HGNC Symbol;Acc:17129]                                                                                                    |   |
| <b>SLC39A8</b>  | Solute carrier family 39 (zinc transporter), member 8 [Source:HGNC Symbol;Acc:20862]                                                                                                    |   |
| <b>SLC3A1</b>   | Solute carrier family 3 (cystine, dibasic and neutral amino acid transporters, activator of cystine, dibasic and neutral amino acid transport), member 1 [Source:HGNC Symbol;Acc:11025] |   |
| <b>SLC3A2</b>   | Solute carrier family 3 (activators of dibasic and neutral amino acid transport), member 2 [Source:HGNC Symbol;Acc:11026]                                                               |   |
| <b>SLC45A3</b>  | Solute carrier family 45, member 3                                                                                                                                                      | √ |
| <b>SLC46A1</b>  | Solute carrier family 46 (folate transporter), member 1 [Source:HGNC Symbol;Acc:30521]                                                                                                  |   |
| <b>SLC46A2</b>  | Solute carrier family 46, member 2 [Source:HGNC Symbol;Acc:16055]                                                                                                                       |   |
| <b>SLC48A1</b>  | Solute carrier family 48 (heme transporter), member 1 [Source:HGNC Symbol;Acc:26035]                                                                                                    |   |
| <b>SLC4A1</b>   | Solute carrier family 4, anion exchanger, member 1 (erythrocyte membrane protein band 3, Diego blood group) [Source:HGNC Symbol;Acc:11027]                                              |   |

|                |                                                                                                                                |  |
|----------------|--------------------------------------------------------------------------------------------------------------------------------|--|
| <b>SLC4A10</b> | Solute carrier family 4, sodium bicarbonate transporter, member 10<br>[Source:HGNC Symbol;Acc:13811]                           |  |
| <b>SLC4A2</b>  | Solute carrier family 4, anion exchanger, member 2 (erythrocyte membrane protein band 3-like 1) [Source:HGNC Symbol;Acc:11028] |  |
| <b>SLC4A4</b>  | Solute carrier family 4, sodium bicarbonate cotransporter, member 4<br>[Source:HGNC Symbol;Acc:11030]                          |  |
| <b>SLC4A5</b>  | Solute carrier family 4, sodium bicarbonate cotransporter, member 5<br>[Source:HGNC Symbol;Acc:18168]                          |  |
| <b>SLC5A1</b>  | Solute carrier family 5 (sodium/glucose cotransporter), member 1<br>[Source:HGNC Symbol;Acc:11036]                             |  |
| <b>SLC5A10</b> | Solute carrier family 5 (sodium/glucose cotransporter), member 10<br>[Source:HGNC Symbol;Acc:23155]                            |  |
| <b>SLC5A11</b> | Solute carrier family 5 (sodium/glucose cotransporter), member 11<br>[Source:HGNC Symbol;Acc:23091]                            |  |
| <b>SLC5A3</b>  | Solute carrier family 5 (sodium/myo-inositol cotransporter), member 3<br>[Source:HGNC Symbol;Acc:11038]                        |  |
| <b>SLC5A4</b>  | Solute carrier family 5 (low affinity glucose cotransporter), member 4<br>[Source:HGNC Symbol;Acc:11039]                       |  |
| <b>SLC5A9</b>  | Solute carrier family 5 (sodium/glucose cotransporter), member 9<br>[Source:HGNC Symbol;Acc:22146]                             |  |
| <b>SLC6A1</b>  | Solute carrier family 6 (neurotransmitter transporter, GABA), member 1<br>[Source:HGNC Symbol;Acc:11042]                       |  |
| <b>SLC6A12</b> | Solute carrier family 6 (neurotransmitter transporter, betaine/GABA), member 12 [Source:HGNC Symbol;Acc:11045]                 |  |
| <b>SLC6A13</b> | Solute carrier family 6 (neurotransmitter transporter, GABA), member 13<br>[Source:HGNC Symbol;Acc:11046]                      |  |
| <b>SLC6A17</b> | Solute carrier family 6, member 17 [Source:HGNC Symbol;Acc:31399]                                                              |  |
| <b>SLC6A19</b> | Solute carrier family 6 (neutral amino acid transporter), member 19<br>[Source:HGNC Symbol;Acc:27960]                          |  |
| <b>SLC6A20</b> | Solute carrier family 6 (proline IMINO transporter), member 20 [Source:HGNC Symbol;Acc:30927]                                  |  |
| <b>SLC6A3</b>  | Solute carrier family 6 (neurotransmitter transporter, dopamine), member 3<br>[Source:HGNC Symbol;Acc:11049]                   |  |

|                 |                                                                                                                   |  |
|-----------------|-------------------------------------------------------------------------------------------------------------------|--|
| <b>SLC6A4</b>   | Solute carrier family 6 (neurotransmitter transporter, serotonin), member 4<br>[Source:HGNC Symbol;Acc:11050]     |  |
| <b>SLC6A6</b>   | Solute carrier family 6 (neurotransmitter transporter, taurine), member 6<br>[Source:HGNC Symbol;Acc:11052]       |  |
| <b>SLC6A8</b>   | Solute carrier family 6 (neurotransmitter transporter, creatine), member 8<br>[Source:HGNC Symbol;Acc:11055]      |  |
| <b>SLC6A9</b>   | Solute carrier family 6 (neurotransmitter transporter, glycine), member 9<br>[Source:HGNC Symbol;Acc:11056]       |  |
| <b>SLC7A1</b>   | Solute carrier family 7 (cationic amino acid transporter, y+ system), member 1<br>[Source:HGNC Symbol;Acc:11057]  |  |
| <b>SLC7A11</b>  | Solute carrier family 7, (cationic amino acid transporter, y+ system) member 11<br>[Source:HGNC Symbol;Acc:11059] |  |
| <b>SLC7A14</b>  | Solute carrier family 7 (cationic amino acid transporter, y+ system), member 14<br>[Source:HGNC Symbol;Acc:29326] |  |
| <b>SLC7A6</b>   | Solute carrier family 7 (cationic amino acid transporter, y+ system), member 6<br>[Source:HGNC Symbol;Acc:11064]  |  |
| <b>SLC7A6OS</b> | Solute carrier family 7, member 6 opposite strand [Source:HGNC<br>Symbol;Acc:25807]                               |  |
| <b>SLC8A1</b>   | Solute carrier family 8 (sodium/calcium exchanger), member 1 [Source:HGNC<br>Symbol;Acc:11068]                    |  |
| <b>SLC9A1</b>   | Solute carrier family 9 (sodium/hydrogen exchanger), member 1 [Source:HGNC<br>Symbol;Acc:11071]                   |  |
| <b>SLC9A2</b>   | Solute carrier family 9 (sodium/hydrogen exchanger), member 2 [Source:HGNC<br>Symbol;Acc:11072]                   |  |
| <b>SLC9A3</b>   | Solute carrier family 9 (sodium/hydrogen exchanger), member 3 [Source:HGNC<br>Symbol;Acc:11073]                   |  |
| <b>SLC9A4</b>   | Solute carrier family 9 (sodium/hydrogen exchanger), member 4 [Source:HGNC<br>Symbol;Acc:11077]                   |  |
| <b>SLC9A6</b>   | Solute carrier family 9 (sodium/hydrogen exchanger), member 6 [Source:HGNC<br>Symbol;Acc:11079]                   |  |
| <b>SLCO1A2</b>  | Solute carrier organic anion transporter family, member 1A2 [Source:HGNC<br>Symbol;Acc:10956]                     |  |

|                |                                                                                                                                  |  |
|----------------|----------------------------------------------------------------------------------------------------------------------------------|--|
| <b>SLCO2A1</b> | Solute carrier organic anion transporter family, member 2A1 [Source:HGNC Symbol;Acc:10955]                                       |  |
| <b>SLCO4A1</b> | Solute carrier organic anion transporter family, member 4A1 [Source:HGNC Symbol;Acc:10953]                                       |  |
| <b>SLCO6A1</b> | Solute carrier organic anion transporter family, member 6A1 [Source:HGNC Symbol;Acc:23613]                                       |  |
| <b>SLFN5</b>   | Schlafen family member 5 [Source:HGNC Symbol;Acc:28286]                                                                          |  |
| <b>SLIT1</b>   | Slit homolog 1 (Drosophila) [Source:HGNC Symbol;Acc:11085]                                                                       |  |
| <b>SLIT2</b>   | Slit homolog 2 (Drosophila) [Source:HGNC Symbol;Acc:11086]                                                                       |  |
| <b>SLIT3</b>   | Slit homolog 3 (Drosophila) [Source:HGNC Symbol;Acc:11087]                                                                       |  |
| <b>SLITRK2</b> | SLIT and NTRK-like family, member 2 [Source:HGNC Symbol;Acc:13449]                                                               |  |
| <b>SLITRK5</b> | SLIT and NTRK-like family, member 5 [Source:HGNC Symbol;Acc:20295]                                                               |  |
| <b>SLK</b>     | STE20-like kinase [Source:HGNC Symbol;Acc:11088]                                                                                 |  |
| <b>SLMAP</b>   | Sarcolemma associated protein [Source:HGNC Symbol;Acc:16643]                                                                     |  |
| <b>SLMO1</b>   | Slowmo homolog 1 (Drosophila) [Source:HGNC Symbol;Acc:24639]                                                                     |  |
| <b>SLN</b>     | Sarcoplipin [Source:HGNC Symbol;Acc:11089]                                                                                       |  |
| <b>SMAD3</b>   | SMAD family member 3 [Source:HGNC Symbol;Acc:6769]                                                                               |  |
| <b>SMAD4</b>   | SMAD family member 4 [Source:HGNC Symbol;Acc:6770]                                                                               |  |
| <b>SMAD5</b>   | SMAD family member 5 [Source:HGNC Symbol;Acc:6771]                                                                               |  |
| <b>SMAD7</b>   | SMAD family member 7 [Source:HGNC Symbol;Acc:6773]                                                                               |  |
| <b>SMAP2</b>   | Small arfgap2 [Source:HGNC Symbol;Acc:25082]                                                                                     |  |
| <b>SMARCA1</b> | SWI/SNF related, matrix associated, actin dependent regulator of chromatin, subfamily a, member 1 [Source:HGNC Symbol;Acc:11097] |  |
| <b>SMARCA5</b> | SWI/SNF related, matrix associated, actin dependent regulator of chromatin, subfamily a, member 5 [Source:HGNC Symbol;Acc:11101] |  |
| <b>SMARCC2</b> | SWI/SNF related, matrix associated, actin dependent regulator of chromatin, subfamily c, member 2 [Source:HGNC Symbol;Acc:11105] |  |
| <b>SMC1A</b>   | Structural maintenance of chromosomes 1A [Source:HGNC Symbol;Acc:11111]                                                          |  |
| <b>SMC1B</b>   | Structural maintenance of chromosomes 1B [Source:HGNC Symbol;Acc:11112]                                                          |  |



|                |                                                                                                                 |   |
|----------------|-----------------------------------------------------------------------------------------------------------------|---|
| <b>SMC2</b>    | Structural maintenance of chromosomes 2 [Source:HGNC Symbol;Acc:14011]                                          |   |
| <b>SMC4</b>    | Structural maintenance of chromosomes 4 [Source:HGNC Symbol;Acc:14013]                                          |   |
| <b>SMC6</b>    | Structural maintenance of chromosomes 6 [Source:HGNC Symbol;Acc:20466]                                          |   |
| <b>SMCHD1</b>  | Structural maintenance of chromosomes flexible hinge domain containing 1 [Source:HGNC Symbol;Acc:29090]         |   |
| <b>SMCR7</b>   | Smith-Magenis syndrome chromosome region, candidate 7 [Source:HGNC Symbol;Acc:17920]                            |   |
| <b>SMCR7L</b>  | Smith-Magenis syndrome chromosome region, candidate 7-like [Source:HGNC Symbol;Acc:25979]                       |   |
| <b>SMG1</b>    | SMG1 homolog, phosphatidylinositol 3-kinase-related kinase (C. Elegans) [Source:HGNC Symbol;Acc:30045]          |   |
| <b>SMG5</b>    | Smg-5 homolog, nonsense mediated mrna decay factor (C. Elegans) [Source:HGNC Symbol;Acc:24644]                  |   |
| <b>SMG6</b>    | Smg-6 homolog, nonsense mediated mrna decay factor (C. Elegans) [Source:HGNC Symbol;Acc:17809]                  |   |
| <b>SMG7</b>    | Smg-7 homolog, nonsense mediated mrna decay factor (C. Elegans) [Source:HGNC Symbol;Acc:16792]                  |   |
| <b>SMO</b>     | Smoothened homolog (Drosophila)                                                                                 | √ |
| <b>SMPD4</b>   | Sphingomyelin phosphodiesterase 4, neutral membrane (neutral sphingomyelinase-3) [Source:HGNC Symbol;Acc:32949] |   |
| <b>SMPDL3A</b> | Sphingomyelin phosphodiesterase, acid-like 3A [Source:HGNC Symbol;Acc:17389]                                    |   |
| <b>SMPX</b>    | Small muscle protein, X-linked [Source:HGNC Symbol;Acc:11122]                                                   |   |
| <b>SMTN</b>    | Smoothelin [Source:HGNC Symbol;Acc:11126]                                                                       |   |
| <b>SMU1</b>    | Smu-1 suppressor of mec-8 and unc-52 homolog (C. Elegans) [Source:HGNC Symbol;Acc:18247]                        |   |
| <b>SMURF1</b>  | SMAD specific E3 ubiquitin protein ligase 1 [Source:HGNC Symbol;Acc:16807]                                      |   |
| <b>SMYD1</b>   | SET and MYND domain containing 1 [Source:HGNC Symbol;Acc:20986]                                                 |   |
| <b>SMYD4</b>   | SET and MYND domain containing 4 [Source:HGNC Symbol;Acc:21067]                                                 |   |

|                 |                                                                                                                |  |
|-----------------|----------------------------------------------------------------------------------------------------------------|--|
| <b>SMYD5</b>    | SMYD family member 5 [Source:HGNC Symbol;Acc:16258]                                                            |  |
| <b>SNAP25</b>   | Synaptosomal-associated protein, 25kda [Source:HGNC Symbol;Acc:11132]                                          |  |
| <b>SNCAIP</b>   | Synuclein, alpha interacting protein [Source:HGNC Symbol;Acc:11139]                                            |  |
| <b>SNED1</b>    | Sushi, nidogen and EGF-like domains 1 [Source:HGNC Symbol;Acc:24696]                                           |  |
| <b>SNRK</b>     | SNF related kinase [Source:HGNC Symbol;Acc:30598]                                                              |  |
| <b>SNRNP200</b> | Small nuclear ribonucleoprotein 200kda (U5) [Source:HGNC Symbol;Acc:30859]                                     |  |
| <b>SNRNP70</b>  | Small nuclear ribonucleoprotein 70kda (U1) [Source:HGNC Symbol;Acc:11150]                                      |  |
| <b>SNRPD1</b>   | Small nuclear ribonucleoprotein D1 polypeptide 16kda [Source:HGNC Symbol;Acc:11158]                            |  |
| <b>SNRPD3</b>   | Small nuclear ribonucleoprotein D3 polypeptide 18kda [Source:HGNC Symbol;Acc:11160]                            |  |
| <b>SNRPE</b>    | Small nuclear ribonucleoprotein polypeptide E [Source:HGNC Symbol;Acc:11161]                                   |  |
| <b>SNRPN</b>    | Small nuclear ribonucleoprotein polypeptide N [Source:HGNC Symbol;Acc:11164]                                   |  |
| <b>SNTB2</b>    | Syntrophin, beta 2 (dystrophin-associated protein A1, 59kda, basic component 2) [Source:HGNC Symbol;Acc:11169] |  |
| <b>SNURF</b>    | SNRPN upstream reading frame [Source:HGNC Symbol;Acc:11171]                                                    |  |
| <b>SNX1</b>     | Sorting nexin 1 [Source:HGNC Symbol;Acc:11172]                                                                 |  |
| <b>SNX10</b>    | Sorting nexin 10 [Source:HGNC Symbol;Acc:14974]                                                                |  |
| <b>SNX13</b>    | Sorting nexin 13 [Source:HGNC Symbol;Acc:21335]                                                                |  |
| <b>SNX19</b>    | Sorting nexin 19 [Source:HGNC Symbol;Acc:21532]                                                                |  |
| <b>SNX24</b>    | Sorting nexin 24 [Source:HGNC Symbol;Acc:21533]                                                                |  |
| <b>SNX25</b>    | Sorting nexin 25 [Source:HGNC Symbol;Acc:21883]                                                                |  |
| <b>SNX29</b>    | Sorting nexin 29 [Source:HGNC Symbol;Acc:30542]                                                                |  |
| <b>SNX30</b>    | Sorting nexin family member 30 [Source:HGNC Symbol;Acc:23685]                                                  |  |
| <b>SNX33</b>    | Sorting nexin 33 [Source:HGNC Symbol;Acc:28468]                                                                |  |
| <b>SNX4</b>     | Sorting nexin 4 [Source:HGNC Symbol;Acc:11175]                                                                 |  |
| <b>SNX5</b>     | Sorting nexin 5 [Source:HGNC Symbol;Acc:14969]                                                                 |  |
| <b>SNX7</b>     | Sorting nexin 7 [Source:HGNC Symbol;Acc:14971]                                                                 |  |

|               |                                                                                                |   |
|---------------|------------------------------------------------------------------------------------------------|---|
| <b>SOAT1</b>  | Sterol O-acyltransferase 1 [Source:HGNC Symbol;Acc:11177]                                      |   |
| <b>SOCS4</b>  | Suppressor of cytokine signaling 4 [Source:HGNC Symbol;Acc:19392]                              |   |
| <b>SOCS5</b>  | Suppressor of cytokine signaling 5 [Source:HGNC Symbol;Acc:16852]                              |   |
| <b>SOD2</b>   | Superoxide dismutase 2, mitochondrial [Source:HGNC Symbol;Acc:11180]                           |   |
| <b>SOHLH1</b> | Spermatogenesis and oogenesis specific basic helix-loop-helix 1 [Source:HGNC Symbol;Acc:27845] |   |
| <b>SOLH</b>   | Small optic lobes homolog (Drosophila) [Source:HGNC Symbol;Acc:11182]                          |   |
| <b>SORBS2</b> | Sorbin and SH3 domain containing 2 [Source:HGNC Symbol;Acc:24098]                              |   |
| <b>SORBS3</b> | Sorbin and SH3 domain containing 3 [Source:HGNC Symbol;Acc:30907]                              |   |
| <b>SORCS1</b> | Sortilin-related VPS10 domain containing receptor 1 [Source:HGNC Symbol;Acc:16697]             |   |
| <b>SORCS2</b> | Sortilin-related VPS10 domain containing receptor 2 [Source:HGNC Symbol;Acc:16698]             |   |
| <b>SORCS3</b> | Sortilin-related VPS10 domain containing receptor 3 [Source:HGNC Symbol;Acc:16699]             |   |
| <b>SORL1</b>  | Sortilin-related receptor, L(DLR class) A repeats containing [Source:HGNC Symbol;Acc:11185]    |   |
| <b>SORT1</b>  | Sortilin 1 [Source:HGNC Symbol;Acc:11186]                                                      |   |
| <b>SOS1</b>   | Son of sevenless homolog 1 (Drosophila) [Source:HGNC Symbol;Acc:11187]                         |   |
| <b>SOS2</b>   | Son of sevenless homolog 2 (Drosophila) [Source:HGNC Symbol;Acc:11188]                         |   |
| <b>SOX13</b>  | SR Y (sex determining region Y)-box 13 [Source:HGNC Symbol;Acc:11192]                          |   |
| <b>SOX2</b>   | SR Y (sex determining region Y)-box 2                                                          | √ |
| <b>SOX6</b>   | SR Y (sex determining region Y)-box 6 [Source:HGNC Symbol;Acc:16421]                           |   |
| <b>SOX7</b>   | SR Y (sex determining region Y)-box 7 [Source:HGNC Symbol;Acc:18196]                           |   |
| <b>SOX9</b>   | SR Y (sex determining region Y)-box 9 [Source:HGNC Symbol;Acc:11204]                           |   |
| <b>SP110</b>  | SP110 nuclear body protein [Source:HGNC Symbol;Acc:5401]                                       |   |
| <b>SP140</b>  | SP140 nuclear body protein [Source:HGNC Symbol;Acc:17133]                                      |   |
| <b>SP140L</b> | SP140 nuclear body protein-like [Source:HGNC Symbol;Acc:25105]                                 |   |
| <b>SP2</b>    | Sp2 transcription factor [Source:HGNC Symbol;Acc:11207]                                        |   |
| <b>SP3</b>    | Sp3 transcription factor [Source:HGNC Symbol;Acc:11208]                                        |   |

|                |                                                                                               |  |
|----------------|-----------------------------------------------------------------------------------------------|--|
| <b>SP8</b>     | Sp8 transcription factor [Source:HGNC Symbol;Acc:19196]                                       |  |
| <b>SPAG11A</b> | Sperm associated antigen 11A [Source:HGNC Symbol;Acc:33342]                                   |  |
| <b>SPAG11B</b> | Sperm associated antigen 11B [Source:HGNC Symbol;Acc:14534]                                   |  |
| <b>SPAG16</b>  | Sperm associated antigen 16 [Source:HGNC Symbol;Acc:23225]                                    |  |
| <b>SPAG5</b>   | Sperm associated antigen 5 [Source:HGNC Symbol;Acc:13452]                                     |  |
| <b>SPAG6</b>   | Sperm associated antigen 6 [Source:HGNC Symbol;Acc:11215]                                     |  |
| <b>SPAG9</b>   | Sperm associated antigen 9 [Source:HGNC Symbol;Acc:14524]                                     |  |
| <b>SPATA13</b> | Spermatogenesis associated 13 [Source:HGNC Symbol;Acc:23222]                                  |  |
| <b>SPATA17</b> | Spermatogenesis associated 17 [Source:HGNC Symbol;Acc:25184]                                  |  |
| <b>SPATA20</b> | Spermatogenesis associated 20 [Source:HGNC Symbol;Acc:26125]                                  |  |
| <b>SPATA5</b>  | Spermatogenesis associated 5 [Source:HGNC Symbol;Acc:18119]                                   |  |
| <b>SPATA7</b>  | Spermatogenesis associated 7 [Source:HGNC Symbol;Acc:20423]                                   |  |
| <b>SPATA9</b>  | Spermatogenesis associated 9 [Source:HGNC Symbol;Acc:22988]                                   |  |
| <b>SPDYE4</b>  | Speedy homolog E4 ( <i>Xenopus laevis</i> ) [Source:HGNC Symbol;Acc:35463]                    |  |
| <b>SPECC1</b>  | Sperm antigen with calponin homology and coiled-coil domains 1 [Source:HGNC Symbol;Acc:30615] |  |
| <b>SPEF2</b>   | Sperm flagellar 2 [Source:HGNC Symbol;Acc:26293]                                              |  |
| <b>SPEG</b>    | SPEG complex locus [Source:HGNC Symbol;Acc:16901]                                             |  |
| <b>SPEN</b>    | Spn homolog, transcriptional regulator ( <i>Drosophila</i> ) [Source:HGNC Symbol;Acc:17575]   |  |
| <b>SPG11</b>   | Spastic paraplegia 11 (autosomal recessive) [Source:HGNC Symbol;Acc:11226]                    |  |
| <b>SPG21</b>   | Spastic paraplegia 21 (autosomal recessive, Mast syndrome) [Source:HGNC Symbol;Acc:20373]     |  |
| <b>SPHK1</b>   | Sphingosine kinase 1 [Source:HGNC Symbol;Acc:11240]                                           |  |
| <b>SPHKAP</b>  | SPHK1 interactor, AKAP domain containing [Source:HGNC Symbol;Acc:30619]                       |  |
| <b>SPINK13</b> | Serine peptidase inhibitor, Kazal type 13 (putative) [Source:HGNC Symbol;Acc:27200]           |  |
| <b>SPINK7</b>  | Serine peptidase inhibitor, Kazal type 7 (putative) [Source:HGNC Symbol;Acc:24643]            |  |
| <b>SPINT2</b>  | Serine peptidase inhibitor, Kunitz type, 2 [Source:HGNC Symbol;Acc:11247]                     |  |

|               |                                                                                                         |  |
|---------------|---------------------------------------------------------------------------------------------------------|--|
| <b>SPIRE1</b> | Spire homolog 1 (Drosophila) [Source:HGNC Symbol;Acc:30622]                                             |  |
| <b>SPN</b>    | Sialoporphin [Source:HGNC Symbol;Acc:11249]                                                             |  |
| <b>SPNS1</b>  | Spinster homolog 1 (Drosophila) [Source:HGNC Symbol;Acc:30621]                                          |  |
| <b>SPOCK1</b> | Sparc/osteonectin, cwcv and kazal-like domains proteoglycan (testican) 1 [Source:HGNC Symbol;Acc:11251] |  |
| <b>SPOCK2</b> | Sparc/osteonectin, cwcv and kazal-like domains proteoglycan (testican) 2 [Source:HGNC Symbol;Acc:13564] |  |
| <b>SPOCK3</b> | Sparc/osteonectin, cwcv and kazal-like domains proteoglycan (testican) 3 [Source:HGNC Symbol;Acc:13565] |  |
| <b>SPON2</b>  | Spondin 2, extracellular matrix protein [Source:HGNC Symbol;Acc:11253]                                  |  |
| <b>SPOP</b>   | Speckle-type POZ protein [Source:HGNC Symbol;Acc:11254]                                                 |  |
| <b>SPOPL</b>  | Speckle-type POZ protein-like [Source:HGNC Symbol;Acc:27934]                                            |  |
| <b>SPRED1</b> | Sprouty-related, EVH1 domain containing 1 [Source:HGNC Symbol;Acc:20249]                                |  |
| <b>SPRY4</b>  | Sprouty homolog 4 (Drosophila) [Source:HGNC Symbol;Acc:15533]                                           |  |
| <b>SPSB3</b>  | Spla/Ryanodine receptor domain and SOCS box containing 3 [Source:HGNC Symbol;Acc:30629]                 |  |
| <b>SPTA1</b>  | Spectrin, alpha, erythrocytic 1 (elliptocytosis 2) [Source:HGNC Symbol;Acc:11272]                       |  |
| <b>SPTB</b>   | Spectrin, beta, erythrocytic [Source:HGNC Symbol;Acc:11274]                                             |  |
| <b>SPTLC2</b> | Serine palmitoyltransferase, long chain base subunit 2 [Source:HGNC Symbol;Acc:11278]                   |  |
| <b>SPZ1</b>   | Spermatogenic leucine zipper 1 [Source:HGNC Symbol;Acc:30721]                                           |  |
| <b>SQSTM1</b> | Sequestosome 1 [Source:HGNC Symbol;Acc:11280]                                                           |  |
| <b>SRA1</b>   | Steroid receptor RNA activator 1 [Source:HGNC Symbol;Acc:11281]                                         |  |
| <b>SRC</b>    | V-src sarcoma (Schmidt-Ruppin A-2) viral oncogene homolog (avian) [Source:HGNC Symbol;Acc:11283]        |  |
| <b>SRCAP</b>  | Snf2-related CREBBP activator protein [Source:HGNC Symbol;Acc:16974]                                    |  |
| <b>SRCIN1</b> | SRC kinase signaling inhibitor 1 [Source:HGNC Symbol;Acc:29506]                                         |  |
| <b>SREBF1</b> | Sterol regulatory element binding transcription factor 1 [Source:HGNC Symbol;Acc:11289]                 |  |

|               |                                                                                                      |   |
|---------------|------------------------------------------------------------------------------------------------------|---|
| <b>SREBF2</b> | Sterol regulatory element binding transcription factor 2 [Source:HGNC Symbol;Acc:11290]              |   |
| <b>SREK1</b>  | Splicing regulatory glutamine/lysine-rich protein 1 [Source:HGNC Symbol;Acc:17882]                   |   |
| <b>SRGAP3</b> | <b>SLIT-ROBO Rho GTPase activating protein 3</b>                                                     | √ |
| <b>SRI</b>    | Sorcin [Source:HGNC Symbol;Acc:11292]                                                                |   |
| <b>SRP72</b>  | Signal recognition particle 72kda [Source:HGNC Symbol;Acc:11303]                                     |   |
| <b>SRPK1</b>  | SRSF protein kinase 1 [Source:HGNC Symbol;Acc:11305]                                                 |   |
| <b>SRPK2</b>  | SRSF protein kinase 2 [Source:HGNC Symbol;Acc:11306]                                                 |   |
| <b>SRPK3</b>  | SRSF protein kinase 3 [Source:HGNC Symbol;Acc:11402]                                                 |   |
| <b>SRRM4</b>  | Serine/arginine repetitive matrix 4 [Source:HGNC Symbol;Acc:29389]                                   |   |
| <b>SRRT</b>   | Serrate RNA effector molecule homolog (Arabidopsis) [Source:HGNC Symbol;Acc:24101]                   |   |
| <b>SRSF1</b>  | Serine/arginine-rich splicing factor 1 [Source:HGNC Symbol;Acc:10780]                                |   |
| <b>SRSF10</b> | Serine/arginine-rich splicing factor 10 [Source:HGNC Symbol;Acc:16713]                               |   |
| <b>SRSF11</b> | Serine/arginine-rich splicing factor 11 [Source:HGNC Symbol;Acc:10782]                               |   |
| <b>SS18</b>   | <b>Synovial sarcoma translocation, chromosome 18</b>                                                 | √ |
| <b>SS18L1</b> | <b>Synovial sarcoma translocation gene on chromosome 18-like 1</b>                                   | √ |
| <b>SS18L1</b> | Synovial sarcoma translocation gene on chromosome 18-like 1 [Source:HGNC Symbol;Acc:15592]           |   |
| <b>SSBP1</b>  | Single-stranded DNA binding protein 1 [Source:HGNC Symbol;Acc:11317]                                 |   |
| <b>SSBP2</b>  | Single-stranded DNA binding protein 2 [Source:HGNC Symbol;Acc:15831]                                 |   |
| <b>SSC5D</b>  | Scavenger receptor cysteine rich domain containing (5 domains) [Source:HGNC Symbol;Acc:26641]        |   |
| <b>SSH1</b>   | Slingshot homolog 1 (Drosophila) [Source:HGNC Symbol;Acc:30579]                                      |   |
| <b>SSH2</b>   | Slingshot homolog 2 (Drosophila) [Source:HGNC Symbol;Acc:30580]                                      |   |
| <b>SSH3</b>   | Slingshot homolog 3 (Drosophila) [Source:HGNC Symbol;Acc:30581]                                      |   |
| <b>SSR3</b>   | Signal sequence receptor, gamma (translocon-associated protein gamma) [Source:HGNC Symbol;Acc:11325] |   |
| <b>SSRP1</b>  | Structure specific recognition protein 1 [Source:HGNC Symbol;Acc:11327]                              |   |
| <b>SSTR1</b>  | Somatostatin receptor 1 [Source:HGNC Symbol;Acc:11330]                                               |   |
| <b>SSTR2</b>  | Somatostatin receptor 2 [Source:HGNC Symbol;Acc:11331]                                               |   |
| <b>SSTR5</b>  | Somatostatin receptor 5 [Source:HGNC Symbol;Acc:11334]                                               |   |

|                   |                                                                                                                                             |   |
|-------------------|---------------------------------------------------------------------------------------------------------------------------------------------|---|
| <b>SSU72</b>      | SSU72 RNA polymerase II CTD phosphatase homolog (S. Cerevisiae) [Source:HGNC Symbol;Acc:25016]                                              |   |
| <b>SSX1</b>       | Synovial sarcoma, X breakpoint 1 [Source:HGNC Symbol;Acc:11335]                                                                             | √ |
| <b>SSX2</b>       | Synovial sarcoma, X breakpoint 2 [Source:HGNC Symbol;Acc:11336]                                                                             | √ |
| <b>SSX2B</b>      | Synovial sarcoma, X breakpoint 2B [Source:HGNC Symbol;Acc:22263]                                                                            |   |
| <b>SSX3</b>       | Synovial sarcoma, X breakpoint 3 [Source:HGNC Symbol;Acc:11337]                                                                             |   |
| <b>SSX4</b>       | Synovial sarcoma, X breakpoint 4 [Source:HGNC Symbol;Acc:11338]                                                                             | √ |
| <b>SSX4B</b>      | Synovial sarcoma, X breakpoint 4B [Source:HGNC Symbol;Acc:16880]                                                                            |   |
| <b>SSX5</b>       | Synovial sarcoma, X breakpoint 5 [Source:HGNC Symbol;Acc:11339]                                                                             |   |
| <b>SSX6</b>       | Synovial sarcoma, X breakpoint 6 (pseudogene) [Source:HGNC Symbol;Acc:19652]                                                                |   |
| <b>SSX7</b>       | Synovial sarcoma, X breakpoint 7 [Source:HGNC Symbol;Acc:19653]                                                                             |   |
| <b>SSX9</b>       | Synovial sarcoma, X breakpoint 9 [Source:HGNC Symbol;Acc:19655]                                                                             |   |
| <b>ST13</b>       | Suppression of tumorigenicity 13 (colon carcinoma) (Hsp70 interacting protein) [Source:HGNC Symbol;Acc:11343]                               |   |
| <b>ST18</b>       | Suppression of tumorigenicity 18 (breast carcinoma) (zinc finger protein) [Source:HGNC Symbol;Acc:18695]                                    |   |
| <b>ST5</b>        | Suppression of tumorigenicity 5 [Source:HGNC Symbol;Acc:11350]                                                                              |   |
| <b>ST6GAL2</b>    | ST6 beta-galactosamide alpha-2,6-sialyltransferase 2 [Source:HGNC Symbol;Acc:10861]                                                         |   |
| <b>ST6GALNAC3</b> | ST6 (alpha-N-acetyl-neuraminy-2,3-beta-galactosyl-1,3)-N-acetylgalactosaminide alpha-2,6-sialyltransferase 3 [Source:HGNC Symbol;Acc:19343] |   |
| <b>ST6GALNAC5</b> | ST6 (alpha-N-acetyl-neuraminy-2,3-beta-galactosyl-1,3)-N-acetylgalactosaminide alpha-2,6-sialyltransferase 5 [Source:HGNC Symbol;Acc:19342] |   |
| <b>ST6GALNAC6</b> | ST6 (alpha-N-acetyl-neuraminy-2,3-beta-galactosyl-1,3)-N-acetylgalactosaminide alpha-2,6-sialyltransferase 6 [Source:HGNC Symbol;Acc:23364] |   |
| <b>ST7L</b>       | Suppression of tumorigenicity 7 like [Source:HGNC Symbol;Acc:18441]                                                                         |   |
| <b>ST8SIA2</b>    | ST8 alpha-N-acetyl-neuraminide alpha-2,8-sialyltransferase 2 [Source:HGNC Symbol;Acc:10870]                                                 |   |

|                |                                                                                                                 |   |
|----------------|-----------------------------------------------------------------------------------------------------------------|---|
| <b>ST8SIA4</b> | ST8 alpha-N-acetyl-neuraminide alpha-2,8-sialyltransferase 4 [Source:HGNC Symbol;Acc:10871]                     |   |
| <b>STAB1</b>   | Stabilin 1 [Source:HGNC Symbol;Acc:18628]                                                                       |   |
| <b>STAB2</b>   | Stabilin 2 [Source:HGNC Symbol;Acc:18629]                                                                       |   |
| <b>STAC2</b>   | SH3 and cysteine rich domain 2 [Source:HGNC Symbol;Acc:23990]                                                   |   |
| <b>STAG1</b>   | Stromal antigen 1 [Source:HGNC Symbol;Acc:11354]                                                                |   |
| <b>STAG2</b>   | Stromal antigen 2 [Source:HGNC Symbol;Acc:11355]                                                                | √ |
| <b>STARD3</b>  | Star-related lipid transfer (START) domain containing 3 [Source:HGNC Symbol;Acc:17579]                          |   |
| <b>STARD4</b>  | Star-related lipid transfer (START) domain containing 4 [Source:HGNC Symbol;Acc:18058]                          |   |
| <b>STARD5</b>  | Star-related lipid transfer (START) domain containing 5 [Source:HGNC Symbol;Acc:18065]                          |   |
| <b>STARD7</b>  | Star-related lipid transfer (START) domain containing 7 [Source:HGNC Symbol;Acc:18063]                          |   |
| <b>STARD9</b>  | Star-related lipid transfer (START) domain containing 9 [Source:HGNC Symbol;Acc:19162]                          |   |
| <b>STAT3</b>   | Signal transducer and activator of transcription 3 (acute-phase response factor) [Source:HGNC Symbol;Acc:11364] | √ |
| <b>STAT4</b>   | Signal transducer and activator of transcription 4 [Source:HGNC Symbol;Acc:11365]                               |   |
| <b>STAT5A</b>  | Signal transducer and activator of transcription 5A [Source:HGNC Symbol;Acc:11366]                              |   |
| <b>STAT6</b>   | Signal transducer and activator of transcription 6, interleukin-4 induced [Source:HGNC Symbol;Acc:11368]        |   |
| <b>STBD1</b>   | Starch binding domain 1 [Source:HGNC Symbol;Acc:24854]                                                          |   |
| <b>STC1</b>    | Stanniocalcin 1 [Source:HGNC Symbol;Acc:11373]                                                                  |   |
| <b>STC2</b>    | Stanniocalcin 2 [Source:HGNC Symbol;Acc:11374]                                                                  |   |
| <b>STEAP3</b>  | STEAP family member 3 [Source:HGNC Symbol;Acc:24592]                                                            |   |
| <b>STEAP4</b>  | STEAP family member 4 [Source:HGNC Symbol;Acc:21923]                                                            |   |
| <b>STIL</b>    | SCL/TAL1 interrupting locus [Source:HGNC Symbol;Acc:10879]                                                      |   |
| <b>STIM2</b>   | Stromal interaction molecule 2 [Source:HGNC Symbol;Acc:19205]                                                   |   |
| <b>STIP1</b>   | Stress-induced-phosphoprotein 1 [Source:HGNC Symbol;Acc:11387]                                                  |   |



|                |                                                                                                                  |  |
|----------------|------------------------------------------------------------------------------------------------------------------|--|
| <b>STK3</b>    | Serine/threonine kinase 3 [Source:HGNC Symbol;Acc:11406]                                                         |  |
| <b>STK31</b>   | Serine/threonine kinase 31 [Source:HGNC Symbol;Acc:11407]                                                        |  |
| <b>STK32B</b>  | Serine/threonine kinase 32B [Source:HGNC Symbol;Acc:14217]                                                       |  |
| <b>STK35</b>   | Serine/threonine kinase 35 [Source:HGNC Symbol;Acc:16254]                                                        |  |
| <b>STK36</b>   | Serine/threonine kinase 36 [Source:HGNC Symbol;Acc:17209]                                                        |  |
| <b>STK38L</b>  | Serine/threonine kinase 38 like [Source:HGNC Symbol;Acc:17848]                                                   |  |
| <b>STK39</b>   | Serine threonine kinase 39 [Source:HGNC Symbol;Acc:17717]                                                        |  |
| <b>STK4</b>    | Serine/threonine kinase 4 [Source:HGNC Symbol;Acc:11408]                                                         |  |
| <b>STON1</b>   | Stonin 1 [Source:HGNC Symbol;Acc:17003]                                                                          |  |
| <b>STOX1</b>   | Storkhead box 1 [Source:HGNC Symbol;Acc:23508]                                                                   |  |
| <b>STOX2</b>   | Storkhead box 2 [Source:HGNC Symbol;Acc:25450]                                                                   |  |
| <b>STRA6</b>   | Stimulated by retinoic acid gene 6 homolog (mouse) [Source:HGNC Symbol;Acc:30650]                                |  |
| <b>STRADA</b>  | STE20-related kinase adaptor alpha [Source:HGNC Symbol;Acc:30172]                                                |  |
| <b>STRAP</b>   | Serine/threonine kinase receptor associated protein [Source:HGNC Symbol;Acc:30796]                               |  |
| <b>STRBP</b>   | Spermatid perinuclear RNA binding protein [Source:HGNC Symbol;Acc:16462]                                         |  |
| <b>STRC</b>    | Stereocilin [Source:HGNC Symbol;Acc:16035]                                                                       |  |
| <b>STRN4</b>   | Striatin, calmodulin binding protein 4 [Source:HGNC Symbol;Acc:15721]                                            |  |
| <b>STS</b>     | Steroid sulfatase (microsomal), isozyme S [Source:HGNC Symbol;Acc:11425]                                         |  |
| <b>STT3B</b>   | STT3, subunit of the oligosaccharyltransferase complex, homolog B (S. Cerevisiae) [Source:HGNC Symbol;Acc:30611] |  |
| <b>STX12</b>   | Syntaxin 12 [Source:HGNC Symbol;Acc:11430]                                                                       |  |
| <b>STX16</b>   | Syntaxin 16 [Source:HGNC Symbol;Acc:11431]                                                                       |  |
| <b>STX17</b>   | Syntaxin 17 [Source:HGNC Symbol;Acc:11432]                                                                       |  |
| <b>STX2</b>    | Syntaxin 2 [Source:HGNC Symbol;Acc:3403]                                                                         |  |
| <b>STXBP4</b>  | Syntaxin binding protein 4 [Source:HGNC Symbol;Acc:19694]                                                        |  |
| <b>STXBP5L</b> | Syntaxin binding protein 5-like [Source:HGNC Symbol;Acc:30757]                                                   |  |
| <b>STXBP6</b>  | Syntaxin binding protein 6 (amisyn) [Source:HGNC Symbol;Acc:19666]                                               |  |
| <b>SUGP1</b>   | SURP and G patch domain containing 1 [Source:HGNC Symbol;Acc:18643]                                              |  |

|                 |                                                                                                    |   |
|-----------------|----------------------------------------------------------------------------------------------------|---|
| <b>SUGP2</b>    | SURP and G patch domain containing 2 [Source:HGNC Symbol;Acc:18641]                                |   |
| <b>SULF2</b>    | Sulfatase 2 [Source:HGNC Symbol;Acc:20392]                                                         |   |
| <b>SULT1A1</b>  | Sulfotransferase family, cytosolic, 1A, phenol-preferring, member 1 [Source:HGNC Symbol;Acc:11453] |   |
| <b>SULT1A2</b>  | Sulfotransferase family, cytosolic, 1A, phenol-preferring, member 2 [Source:HGNC Symbol;Acc:11454] |   |
| <b>SULT1A3</b>  | Sulfotransferase family, cytosolic, 1A, phenol-preferring, member 3 [Source:HGNC Symbol;Acc:11455] |   |
| <b>SULT1A4</b>  | Sulfotransferase family, cytosolic, 1A, phenol-preferring, member 4 [Source:HGNC Symbol;Acc:30004] |   |
| <b>SULT1C4</b>  | Sulfotransferase family, cytosolic, 1C, member 4 [Source:HGNC Symbol;Acc:11457]                    |   |
| <b>SULT4A1</b>  | Sulfotransferase family 4A, member 1 [Source:HGNC Symbol;Acc:14903]                                |   |
| <b>SUMF1</b>    | Sulfatase modifying factor 1 [Source:HGNC Symbol;Acc:20376]                                        |   |
| <b>SUMO3</b>    | SMT3 suppressor of mif two 3 homolog 3 ( <i>S. Cerevisiae</i> ) [Source:HGNC Symbol;Acc:11124]     |   |
| <b>SUN1</b>     | Sad1 and UNC84 domain containing 1 [Source:HGNC Symbol;Acc:18587]                                  |   |
| <b>SUN5</b>     | Sad1 and UNC84 domain containing 5 [Source:HGNC Symbol;Acc:16252]                                  |   |
| <b>SUOX</b>     | Sulfite oxidase [Source:HGNC Symbol;Acc:11460]                                                     |   |
| <b>SUPT3H</b>   | Suppressor of Ty 3 homolog ( <i>S. Cerevisiae</i> ) [Source:HGNC Symbol;Acc:11466]                 |   |
| <b>SUPT5H</b>   | Suppressor of Ty 5 homolog ( <i>S. Cerevisiae</i> ) [Source:HGNC Symbol;Acc:11469]                 |   |
| <b>SURF4</b>    | Surfeit 4 [Source:HGNC Symbol;Acc:11476]                                                           |   |
| <b>SUSD1</b>    | Sushi domain containing 1 [Source:HGNC Symbol;Acc:25413]                                           |   |
| <b>SUSD2</b>    | Sushi domain containing 2 [Source:HGNC Symbol;Acc:30667]                                           |   |
| <b>SUSD4</b>    | Sushi domain containing 4 [Source:HGNC Symbol;Acc:25470]                                           |   |
| <b>SUSD5</b>    | Sushi domain containing 5 [Source:HGNC Symbol;Acc:29061]                                           |   |
| <b>SUV420H1</b> | Suppressor of variegation 4-20 homolog 1 ( <i>Drosophila</i> ) [Source:HGNC Symbol;Acc:24283]      |   |
| <b>SUZ12</b>    | Suppressor of zeste 12 homolog ( <i>Drosophila</i> ) [Source:HGNC Symbol;Acc:17101]                | √ |

|                |                                                                                                           |  |
|----------------|-----------------------------------------------------------------------------------------------------------|--|
| <b>SV2B</b>    | Synaptic vesicle glycoprotein 2B [Source:HGNC Symbol;Acc:16874]                                           |  |
| <b>SV2C</b>    | Synaptic vesicle glycoprotein 2C [Source:HGNC Symbol;Acc:30670]                                           |  |
| <b>SVEP1</b>   | Sushi, von Willebrand factor type A, EGF and pentraxin domain containing 1 [Source:HGNC Symbol;Acc:15985] |  |
| <b>SVIL</b>    | Supervillin [Source:HGNC Symbol;Acc:11480]                                                                |  |
| <b>SVOP</b>    | SV2 related protein homolog (rat) [Source:HGNC Symbol;Acc:25417]                                          |  |
| <b>SYBU</b>    | Syntabulin (syntaxin-interacting) [Source:HGNC Symbol;Acc:26011]                                          |  |
| <b>SYK</b>     | Spleen tyrosine kinase [Source:HGNC Symbol;Acc:11491]                                                     |  |
| <b>SYMPK</b>   | Symplekin [Source:HGNC Symbol;Acc:22935]                                                                  |  |
| <b>SYN1</b>    | Synapsin I [Source:HGNC Symbol;Acc:11494]                                                                 |  |
| <b>SYN2</b>    | Synapsin II [Source:HGNC Symbol;Acc:11495]                                                                |  |
| <b>SYNC</b>    | Syncoilin, intermediate filament protein [Source:HGNC Symbol;Acc:28897]                                   |  |
| <b>SYNCRIP</b> | Synaptotagmin binding, cytoplasmic RNA interacting protein [Source:HGNC Symbol;Acc:16918]                 |  |
| <b>SYNE1</b>   | Spectrin repeat containing, nuclear envelope 1 [Source:HGNC Symbol;Acc:17089]                             |  |
| <b>SYNE2</b>   | Spectrin repeat containing, nuclear envelope 2 [Source:HGNC Symbol;Acc:17084]                             |  |
| <b>SYNGAP1</b> | Synaptic Ras gtpase activating protein 1 [Source:HGNC Symbol;Acc:11497]                                   |  |
| <b>SYNGR1</b>  | Synaptogyrin 1 [Source:HGNC Symbol;Acc:11498]                                                             |  |
| <b>SYNJ1</b>   | Synaptojanin 1 [Source:HGNC Symbol;Acc:11503]                                                             |  |
| <b>SYNJ2</b>   | Synaptojanin 2 [Source:HGNC Symbol;Acc:11504]                                                             |  |
| <b>SYNJ2BP</b> | Synaptojanin 2 binding protein [Source:HGNC Symbol;Acc:18955]                                             |  |
| <b>SYNM</b>    | Synemin, intermediate filament protein [Source:HGNC Symbol;Acc:24466]                                     |  |
| <b>SYNPO</b>   | Synaptopodin [Source:HGNC Symbol;Acc:30672]                                                               |  |
| <b>SYNPO2</b>  | Synaptopodin 2 [Source:HGNC Symbol;Acc:17732]                                                             |  |
| <b>SYNPO2L</b> | Synaptopodin 2-like [Source:HGNC Symbol;Acc:23532]                                                        |  |
| <b>SYNRG</b>   | Synergine, gamma [Source:HGNC Symbol;Acc:557]                                                             |  |
| <b>SYP</b>     | Synaptophysin [Source:HGNC Symbol;Acc:11506]                                                              |  |
| <b>SYT1</b>    | Synaptotagmin I [Source:HGNC Symbol;Acc:11509]                                                            |  |
| <b>SYT11</b>   | Synaptotagmin XI [Source:HGNC Symbol;Acc:19239]                                                           |  |
| <b>SYT16</b>   | Synaptotagmin XVI [Source:HGNC Symbol;Acc:23142]                                                          |  |

|                |                                                                                                                        |   |
|----------------|------------------------------------------------------------------------------------------------------------------------|---|
| <b>SYT17</b>   | Synaptotagmin XVII [Source:HGNC Symbol;Acc:24119]                                                                      |   |
| <b>SYT5</b>    | Synaptotagmin V [Source:HGNC Symbol;Acc:11513]                                                                         |   |
| <b>SYT7</b>    | Synaptotagmin VII [Source:HGNC Symbol;Acc:11514]                                                                       |   |
| <b>SYTL2</b>   | Synaptotagmin-like 2 [Source:HGNC Symbol;Acc:15585]                                                                    |   |
| <b>SYTL3</b>   | Synaptotagmin-like 3 [Source:HGNC Symbol;Acc:15587]                                                                    |   |
| <b>SYTL4</b>   | Synaptotagmin-like 4 [Source:HGNC Symbol;Acc:15588]                                                                    |   |
| <b>T</b>       | T, brachyury homolog (mouse) [Source:HGNC Symbol;Acc:11515]                                                            |   |
| <b>TAB1</b>    | TGF-beta activated kinase 1/MAP3K7 binding protein 1 [Source:HGNC Symbol;Acc:18157]                                    |   |
| <b>TACC1</b>   | Transforming, acidic coiled-coil containing protein 1 [Source:HGNC Symbol;Acc:11522]                                   |   |
| <b>TACC2</b>   | Transforming, acidic coiled-coil containing protein 2 [Source:HGNC Symbol;Acc:11523]                                   |   |
| <b>TACSTD2</b> | Tumor-associated calcium signal transducer 2 [Source:HGNC Symbol;Acc:11530]                                            |   |
| <b>TAF1</b>    | TAF1 RNA polymerase II, TATA box binding protein (TBP)-associated factor, 250kda [Source:HGNC Symbol;Acc:11535]        |   |
| <b>TAF11</b>   | TAF11 RNA polymerase II, TATA box binding protein (TBP)-associated factor, 28kda [Source:HGNC Symbol;Acc:11544]        |   |
| <b>TAF12</b>   | TAF12 RNA polymerase II, TATA box binding protein (TBP)-associated factor, 20kda [Source:HGNC Symbol;Acc:11545]        |   |
| <b>TAF15</b>   | TAF15 RNA polymerase II, TATA box binding protein (TBP)-associated factor, 68kda [Source:HGNC Symbol;Acc:11547]        | √ |
| <b>TAF1C</b>   | TATA box binding protein (TBP)-associated factor, RNA polymerase I, C, 110kda [Source:HGNC Symbol;Acc:11534]           |   |
| <b>TAF1D</b>   | TATA box binding protein (TBP)-associated factor, RNA polymerase I, D, 41kda [Source:HGNC Symbol;Acc:28759]            |   |
| <b>TAF4</b>    | TAF4 RNA polymerase II, TATA box binding protein (TBP)-associated factor, 135kda [Source:HGNC Symbol;Acc:11537]        |   |
| <b>TAF5</b>    | TAF5 RNA polymerase II, TATA box binding protein (TBP)-associated factor, 100kda [Source:HGNC Symbol;Acc:11539]        |   |
| <b>TAF5L</b>   | TAF5-like RNA polymerase II, p300/CBP-associated factor (PCAF)-associated factor, 65kda [Source:HGNC Symbol;Acc:17304] |   |

|                 |                                                                                                                |   |
|-----------------|----------------------------------------------------------------------------------------------------------------|---|
| <b>TAF6</b>     | TAF6 RNA polymerase II, TATA box binding protein (TBP)-associated factor, 80kda [Source:HGNC Symbol;Acc:11540] |   |
| <b>TAF9</b>     | TAF9 RNA polymerase II, TATA box binding protein (TBP)-associated factor, 32kda [Source:HGNC Symbol;Acc:11542] |   |
| <b>TAL1</b>     | T-cell acute lymphocytic leukemia 1 [Source:HGNC Symbol;Acc:11556]                                             | √ |
| <b>TALDO1</b>   | Transaldolase 1 [Source:HGNC Symbol;Acc:11559]                                                                 |   |
| <b>TANC2</b>    | Tetratricopeptide repeat, ankyrin repeat and coiled-coil containing 2 [Source:HGNC Symbol;Acc:30212]           |   |
| <b>TAOK1</b>    | TAO kinase 1 [Source:HGNC Symbol;Acc:29259]                                                                    |   |
| <b>TAOK2</b>    | TAO kinase 2 [Source:HGNC Symbol;Acc:16835]                                                                    |   |
| <b>TAP1</b>     | Transporter 1, ATP-binding cassette, sub-family B (MDR/TAP) [Source:HGNC Symbol;Acc:43]                        |   |
| <b>TAPBP</b>    | TAP binding protein (tapasin) [Source:HGNC Symbol;Acc:11566]                                                   |   |
| <b>TARBP1</b>   | TAR (HIV-1) RNA binding protein 1 [Source:HGNC Symbol;Acc:11568]                                               |   |
| <b>TARBP2</b>   | TAR (HIV-1) RNA binding protein 2 [Source:HGNC Symbol;Acc:11569]                                               |   |
| <b>TAS1R1</b>   | Taste receptor, type 1, member 1 [Source:HGNC Symbol;Acc:14448]                                                |   |
| <b>TAS2R1</b>   | Taste receptor, type 2, member 1 [Source:HGNC Symbol;Acc:14909]                                                |   |
| <b>TAS2R3</b>   | Taste receptor, type 2, member 3 [Source:HGNC Symbol;Acc:14910]                                                |   |
| <b>TAS2R38</b>  | Taste receptor, type 2, member 38 [Source:HGNC Symbol;Acc:9584]                                                |   |
| <b>TAS2R39</b>  | Taste receptor, type 2, member 39 [Source:HGNC Symbol;Acc:18886]                                               |   |
| <b>TAS2R40</b>  | Taste receptor, type 2, member 40 [Source:HGNC Symbol;Acc:18885]                                               |   |
| <b>TAS2R42</b>  | Taste receptor, type 2, member 42 [Source:HGNC Symbol;Acc:18888]                                               |   |
| <b>TASP1</b>    | Taspase, threonine aspartase, 1 [Source:HGNC Symbol;Acc:15859]                                                 |   |
| <b>TATDN3</b>   | Tatd dnase domain containing 3 [Source:HGNC Symbol;Acc:27010]                                                  |   |
| <b>TAZ</b>      | Tafazzin [Source:HGNC Symbol;Acc:11577]                                                                        |   |
| <b>TBC1D1</b>   | TBC1 (tre-2/USP6, BUB2, cdc16) domain family, member 1 [Source:HGNC Symbol;Acc:11578]                          |   |
| <b>TBC1D10B</b> | TBC1 domain family, member 10B [Source:HGNC Symbol;Acc:24510]                                                  |   |
| <b>TBC1D14</b>  | TBC1 domain family, member 14 [Source:HGNC Symbol;Acc:29246]                                                   |   |
| <b>TBC1D16</b>  | TBC1 domain family, member 16 [Source:HGNC Symbol;Acc:28356]                                                   |   |
| <b>TBC1D19</b>  | TBC1 domain family, member 19 [Source:HGNC Symbol;Acc:25624]                                                   |   |
| <b>TBC1D21</b>  | TBC1 domain family, member 21 [Source:HGNC Symbol;Acc:28536]                                                   |   |
| <b>TBC1D22A</b> | TBC1 domain family, member 22A [Source:HGNC Symbol;Acc:1309]                                                   |   |

|                |                                                                                 |   |
|----------------|---------------------------------------------------------------------------------|---|
| <b>TBC1D24</b> | TBC1 domain family, member 24 [Source:HGNC Symbol;Acc:29203]                    |   |
| <b>TBC1D26</b> | TBC1 domain family, member 26 [Source:HGNC Symbol;Acc:28745]                    |   |
| <b>TBC1D28</b> | TBC1 domain family, member 28 [Source:HGNC Symbol;Acc:26858]                    |   |
| <b>TBC1D2B</b> | TBC1 domain family, member 2B [Source:HGNC Symbol;Acc:29183]                    |   |
| <b>TBC1D3</b>  | TBC1 domain family, member 3 [Source:HGNC Symbol;Acc:19031]                     |   |
| <b>TBC1D3B</b> | TBC1 domain family, member 3B [Source:HGNC Symbol;Acc:27011]                    |   |
| <b>TBC1D3C</b> | TBC1 domain family, member 3C [Source:HGNC Symbol;Acc:24889]                    |   |
| <b>TBC1D3G</b> | TBC1 domain family, member 3G [Source:HGNC Symbol;Acc:29860]                    |   |
| <b>TBC1D4</b>  | TBC1 domain family, member 4 [Source:HGNC Symbol;Acc:19165]                     |   |
| <b>TBC1D5</b>  | TBC1 domain family, member 5 [Source:HGNC Symbol;Acc:19166]                     |   |
| <b>TBC1D8</b>  | TBC1 domain family, member 8 (with GRAM domain) [Source:HGNC Symbol;Acc:17791]  |   |
| <b>TBC1D8B</b> | TBC1 domain family, member 8B (with GRAM domain) [Source:HGNC Symbol;Acc:24715] |   |
| <b>TBC1D9</b>  | TBC1 domain family, member 9 (with GRAM domain) [Source:HGNC Symbol;Acc:21710]  |   |
| <b>TBC1D9B</b> | TBC1 domain family, member 9B (with GRAM domain) [Source:HGNC Symbol;Acc:29097] |   |
| <b>TBCD</b>    | Tubulin folding cofactor D [Source:HGNC Symbol;Acc:11581]                       |   |
| <b>TBCEL</b>   | Tubulin folding cofactor E-like [Source:HGNC Symbol;Acc:28115]                  |   |
| <b>TBK1</b>    | TANK-binding kinase 1 [Source:HGNC Symbol;Acc:11584]                            |   |
| <b>TBL1X</b>   | Transducin (beta)-like 1X-linked [Source:HGNC Symbol;Acc:11585]                 |   |
| <b>TBL1XR1</b> | Transducin (beta)-like 1 X-linked receptor 1 [Source:HGNC Symbol;Acc:29529]     | √ |
| <b>TBX10</b>   | T-box 10 [Source:HGNC Symbol;Acc:11593]                                         |   |
| <b>TBX15</b>   | T-box 15 [Source:HGNC Symbol;Acc:11594]                                         |   |
| <b>TBX19</b>   | T-box 19 [Source:HGNC Symbol;Acc:11596]                                         |   |
| <b>TBX22</b>   | T-box 22 [Source:HGNC Symbol;Acc:11600]                                         |   |
| <b>TBX4</b>    | T-box 4 [Source:HGNC Symbol;Acc:11603]                                          |   |
| <b>TBXAS1</b>  | Thromboxane A synthase 1 (platelet) [Source:HGNC Symbol;Acc:11609]              |   |
| <b>TCEA2</b>   | Transcription elongation factor A (SII), 2 [Source:HGNC Symbol;Acc:11614]       |   |

|                 |                                                                                                                 |   |
|-----------------|-----------------------------------------------------------------------------------------------------------------|---|
| <b>TCEANC</b>   | Transcription elongation factor A (SII) N-terminal and central domain containing [Source:HGNC Symbol;Acc:28277] |   |
| <b>TCERG1</b>   | Transcription elongation regulator 1 [Source:HGNC Symbol;Acc:15630]                                             |   |
| <b>TCERG1L</b>  | Transcription elongation regulator 1-like [Source:HGNC Symbol;Acc:23533]                                        |   |
| <b>TCF20</b>    | Transcription factor 20 (AR1) [Source:HGNC Symbol;Acc:11631]                                                    |   |
| <b>TCF21</b>    | Transcription factor 21 [Source:HGNC Symbol;Acc:11632]                                                          |   |
| <b>TCF25</b>    | Transcription factor 25 (basic helix-loop-helix) [Source:HGNC Symbol;Acc:29181]                                 |   |
| <b>TCF4</b>     | Transcription factor 4 [Source:HGNC Symbol;Acc:11634]                                                           |   |
| <b>TCHHL1</b>   | Trichohyalin-like 1 [Source:HGNC Symbol;Acc:31796]                                                              |   |
| <b>TCL1A</b>    | T-cell leukemia/lymphoma 1A [Source:HGNC Symbol;Acc:11648]                                                      | √ |
| <b>TCL1B</b>    | T-cell leukemia/lymphoma 1B [Source:HGNC Symbol;Acc:11649]                                                      |   |
| <b>TCOF1</b>    | Treacher Collins-Franceschetti syndrome 1 [Source:HGNC Symbol;Acc:11654]                                        |   |
| <b>TCP11</b>    | T-complex 11 homolog (mouse) [Source:HGNC Symbol;Acc:11658]                                                     |   |
| <b>TCTEX1D1</b> | Tctex1 domain containing 1 [Source:HGNC Symbol;Acc:26882]                                                       |   |
| <b>TCTN1</b>    | Tectonic family member 1 [Source:HGNC Symbol;Acc:26113]                                                         |   |
| <b>TCTN2</b>    | Tectonic family member 2 [Source:HGNC Symbol;Acc:25774]                                                         |   |
| <b>TCTN3</b>    | Tectonic family member 3 [Source:HGNC Symbol;Acc:24519]                                                         |   |
| <b>TDRD1</b>    | Tudor domain containing 1 [Source:HGNC Symbol;Acc:11712]                                                        |   |
| <b>TDRD12</b>   | Tudor domain containing 12 [Source:HGNC Symbol;Acc:25044]                                                       |   |
| <b>TDRD7</b>    | Tudor domain containing 7 [Source:HGNC Symbol;Acc:30831]                                                        |   |
| <b>TDRD9</b>    | Tudor domain containing 9 [Source:HGNC Symbol;Acc:20122]                                                        |   |
| <b>TDRKH</b>    | Tudor and KH domain containing [Source:HGNC Symbol;Acc:11713]                                                   |   |
| <b>TEAD4</b>    | TEA domain family member 4 [Source:HGNC Symbol;Acc:11717]                                                       |   |
| <b>TECPR1</b>   | Tectonin beta-propeller repeat containing 1 [Source:HGNC Symbol;Acc:22214]                                      |   |
| <b>TECPR2</b>   | Tectonin beta-propeller repeat containing 2 [Source:HGNC Symbol;Acc:19957]                                      |   |
| <b>TECTA</b>    | Tectorin alpha [Source:HGNC Symbol;Acc:11720]                                                                   |   |
| <b>TEK</b>      | TEK tyrosine kinase, endothelial [Source:HGNC Symbol;Acc:11724]                                                 |   |
| <b>TEKT1</b>    | Tektin 1 [Source:HGNC Symbol;Acc:15534]                                                                         |   |

|                |                                                                                                               |   |
|----------------|---------------------------------------------------------------------------------------------------------------|---|
| <b>TEP1</b>    | Telomerase-associated protein 1 [Source:HGNC Symbol;Acc:11726]                                                |   |
| <b>TERF1</b>   | Telomeric repeat binding factor (NIMA-interacting) 1 [Source:HGNC Symbol;Acc:11728]                           |   |
| <b>TERT</b>    | Telomerase reverse transcriptase [Source:HGNC Symbol;Acc:11730]                                               | √ |
| <b>TET2</b>    | Tet oncogene family member 2 [Source:HGNC Symbol;Acc:25941]                                                   | √ |
| <b>TEX10</b>   | Testis expressed 10 [Source:HGNC Symbol;Acc:25988]                                                            |   |
| <b>TEX14</b>   | Testis expressed 14 [Source:HGNC Symbol;Acc:11737]                                                            |   |
| <b>TEX15</b>   | Testis expressed 15 [Source:HGNC Symbol;Acc:11738]                                                            |   |
| <b>TEX2</b>    | Testis expressed 2 [Source:HGNC Symbol;Acc:30884]                                                             |   |
| <b>TEX28</b>   | Testis expressed 28 [Source:HGNC Symbol;Acc:2563]                                                             |   |
| <b>TEX28P1</b> | Testis expressed 28 pseudogene 1 [Source:HGNC Symbol;Acc:33356]                                               |   |
| <b>TEX28P2</b> | Testis expressed 28 pseudogene 2 [Source:HGNC Symbol;Acc:33357]                                               |   |
| <b>TF</b>      | Transferrin [Source:HGNC Symbol;Acc:11740]                                                                    |   |
| <b>TFAM</b>    | Transcription factor A, mitochondrial [Source:HGNC Symbol;Acc:11741]                                          |   |
| <b>TFB1M</b>   | Transcription factor B1, mitochondrial [Source:HGNC Symbol;Acc:17037]                                         |   |
| <b>TFCP2L1</b> | Transcription factor CP2-like 1 [Source:HGNC Symbol;Acc:17925]                                                |   |
| <b>TFDP2</b>   | Transcription factor Dp-2 (E2F dimerization partner 2) [Source:HGNC Symbol;Acc:11751]                         |   |
| <b>TFF2</b>    | Trefoil factor 2 [Source:HGNC Symbol;Acc:11756]                                                               |   |
| <b>TFPI</b>    | Tissue factor pathway inhibitor (lipoprotein-associated coagulation inhibitor) [Source:HGNC Symbol;Acc:11760] |   |
| <b>TFPI2</b>   | Tissue factor pathway inhibitor 2 [Source:HGNC Symbol;Acc:11761]                                              |   |
| <b>TFR2</b>    | Transferrin receptor 2 [Source:HGNC Symbol;Acc:11762]                                                         |   |
| <b>TFRC</b>    | Transferrin receptor (p90, CD71) [Source:HGNC Symbol;Acc:11763]                                               | √ |
| <b>TG</b>      | Thyroglobulin [Source:HGNC Symbol;Acc:11764]                                                                  |   |
| <b>TGFA</b>    | Transforming growth factor, alpha [Source:HGNC Symbol;Acc:11765]                                              |   |
| <b>TGFBI</b>   | Transforming growth factor, beta-induced, 68kda [Source:HGNC Symbol;Acc:11771]                                |   |
| <b>TGFBR1</b>  | Transforming growth factor, beta receptor 1 [Source:HGNC Symbol;Acc:11772]                                    |   |
| <b>TGFBR3</b>  | Transforming growth factor, beta receptor III [Source:HGNC Symbol;Acc:11774]                                  |   |



|                 |                                                                                                                                  |   |
|-----------------|----------------------------------------------------------------------------------------------------------------------------------|---|
| <b>TGFBRAP1</b> | Transforming growth factor, beta receptor associated protein 1 [Source:HGNC Symbol;Acc:16836]                                    |   |
| <b>TGIF2</b>    | TGFB-induced factor homeobox 2 [Source:HGNC Symbol;Acc:15764]                                                                    |   |
| <b>TGM1</b>     | Transglutaminase 1 (K polypeptide epidermal type I, protein-glutamine-gamma-glutamyltransferase) [Source:HGNC Symbol;Acc:11777]  |   |
| <b>TGM3</b>     | Transglutaminase 3 (E polypeptide, protein-glutamine-gamma-glutamyltransferase) [Source:HGNC Symbol;Acc:11779]                   |   |
| <b>TGM4</b>     | Transglutaminase 4 (prostate) [Source:HGNC Symbol;Acc:11780]                                                                     |   |
| <b>TGM5</b>     | Transglutaminase 5 [Source:HGNC Symbol;Acc:11781]                                                                                |   |
| <b>TGM6</b>     | Transglutaminase 6 [Source:HGNC Symbol;Acc:16255]                                                                                |   |
| <b>TH1L</b>     | TH1-like (Drosophila) [Source:HGNC Symbol;Acc:15934]                                                                             |   |
| <b>THADA</b>    | Thyroid adenoma associated [Source:HGNC Symbol;Acc:19217]                                                                        |   |
| <b>THAP8</b>    | THAP domain containing 8 [Source:HGNC Symbol;Acc:23191]                                                                          |   |
| <b>THAP9</b>    | THAP domain containing 9 [Source:HGNC Symbol;Acc:23192]                                                                          |   |
| <b>THBD</b>     | Thrombomodulin [Source:HGNC Symbol;Acc:11784]                                                                                    |   |
| <b>THBS3</b>    | Thrombospondin 3 [Source:HGNC Symbol;Acc:11787]                                                                                  |   |
| <b>THBS4</b>    | Thrombospondin 4 [Source:HGNC Symbol;Acc:11788]                                                                                  |   |
| <b>THNSL1</b>   | Threonine synthase-like 1 (S. Cerevisiae) [Source:HGNC Symbol;Acc:26160]                                                         |   |
| <b>THNSL2</b>   | Threonine synthase-like 2 (S. Cerevisiae) [Source:HGNC Symbol;Acc:25602]                                                         |   |
| <b>THOC2</b>    | THO complex 2 [Source:HGNC Symbol;Acc:19073]                                                                                     |   |
| <b>THOC5</b>    | THO complex 5 [Source:HGNC Symbol;Acc:19074]                                                                                     |   |
| <b>THOC6</b>    | THO complex 6 homolog (Drosophila) [Source:HGNC Symbol;Acc:28369]                                                                |   |
| <b>THRA</b>     | Thyroid hormone receptor, alpha (erythroblastic leukemia viral (v-erb-a) oncogene homolog, avian) [Source:HGNC Symbol;Acc:11796] |   |
| <b>THRAP3</b>   | Thyroid hormone receptor associated protein 3 [Source:HGNC Symbol;Acc:22964]                                                     | √ |
| <b>THSD4</b>    | Thrombospondin, type I, domain containing 4 [Source:HGNC Symbol;Acc:25835]                                                       |   |
| <b>THSD7A</b>   | Thrombospondin, type I, domain containing 7A [Source:HGNC Symbol;Acc:22207]                                                      |   |

|                 |                                                                                                          |  |
|-----------------|----------------------------------------------------------------------------------------------------------|--|
| <b>THSD7B</b>   | Thrombospondin, type I, domain containing 7B [Source:HGNC Symbol;Acc:29348]                              |  |
| <b>THUMPD1</b>  | THUMP domain containing 1 [Source:HGNC Symbol;Acc:23807]                                                 |  |
| <b>THUMPD3</b>  | THUMP domain containing 3 [Source:HGNC Symbol;Acc:24493]                                                 |  |
| <b>TIAF1</b>    | TGFB1-induced anti-apoptotic factor 1 [Source:HGNC Symbol;Acc:11803]                                     |  |
| <b>TIAL1</b>    | TIA1 cytotoxic granule-associated RNA binding protein-like 1 [Source:HGNC Symbol;Acc:11804]              |  |
| <b>TIAM2</b>    | T-cell lymphoma invasion and metastasis 2 [Source:HGNC Symbol;Acc:11806]                                 |  |
| <b>TIE1</b>     | Tyrosine kinase with immunoglobulin-like and EGF-like domains 1 [Source:HGNC Symbol;Acc:11809]           |  |
| <b>TIFA</b>     | TRAF-interacting protein with forkhead-associated domain [Source:HGNC Symbol;Acc:19075]                  |  |
| <b>TIFAB</b>    | TRAF-interacting protein with forkhead-associated domain, family member B [Source:HGNC Symbol;Acc:34024] |  |
| <b>TIGD1L2</b>  | Tigger transposable element derived 1-like 2 [Source:HGNC Symbol;Acc:31424]                              |  |
| <b>TIGD6</b>    | Tigger transposable element derived 6 [Source:HGNC Symbol;Acc:18332]                                     |  |
| <b>TIGIT</b>    | T cell immunoreceptor with Ig and ITIM domains [Source:HGNC Symbol;Acc:26838]                            |  |
| <b>TIMELESS</b> | Timeless homolog (Drosophila) [Source:HGNC Symbol;Acc:11813]                                             |  |
| <b>TIMM17A</b>  | Translocase of inner mitochondrial membrane 17 homolog A (yeast) [Source:HGNC Symbol;Acc:17315]          |  |
| <b>TIMM22</b>   | Translocase of inner mitochondrial membrane 22 homolog (yeast) [Source:HGNC Symbol;Acc:17317]            |  |
| <b>TIMM44</b>   | Translocase of inner mitochondrial membrane 44 homolog (yeast) [Source:HGNC Symbol;Acc:17316]            |  |
| <b>TIMP1</b>    | TIMP metalloproteinase inhibitor 1 [Source:HGNC Symbol;Acc:11820]                                        |  |
| <b>TIMP3</b>    | TIMP metalloproteinase inhibitor 3 [Source:HGNC Symbol;Acc:11822]                                        |  |
| <b>TINAG</b>    | Tubulointerstitial nephritis antigen [Source:HGNC Symbol;Acc:14599]                                      |  |
| <b>TIPARP</b>   | TCDD-inducible poly(ADP-ribose) polymerase [Source:HGNC Symbol;Acc:23696]                                |  |
| <b>TIPIN</b>    | TIMELESS interacting protein [Source:HGNC Symbol;Acc:30750]                                              |  |

|                |                                                                                                 |  |
|----------------|-------------------------------------------------------------------------------------------------|--|
| <b>TJAP1</b>   | Tight junction associated protein 1 (peripheral) [Source:HGNC Symbol;Acc:17949]                 |  |
| <b>TJP1</b>    | Tight junction protein 1 (zona occludens 1) [Source:HGNC Symbol;Acc:11827]                      |  |
| <b>TJP2</b>    | Tight junction protein 2 (zona occludens 2) [Source:HGNC Symbol;Acc:11828]                      |  |
| <b>TK2</b>     | Thymidine kinase 2, mitochondrial [Source:HGNC Symbol;Acc:11831]                                |  |
| <b>TLE1</b>    | Transducin-like enhancer of split 1 (E(sp1) homolog, Drosophila) [Source:HGNC Symbol;Acc:11837] |  |
| <b>TLE3</b>    | Transducin-like enhancer of split 3 (E(sp1) homolog, Drosophila) [Source:HGNC Symbol;Acc:11839] |  |
| <b>TLE4</b>    | Transducin-like enhancer of split 4 (E(sp1) homolog, Drosophila) [Source:HGNC Symbol;Acc:11840] |  |
| <b>TLK1</b>    | Tousled-like kinase 1 [Source:HGNC Symbol;Acc:11841]                                            |  |
| <b>TLL1</b>    | Tolloid-like 1 [Source:HGNC Symbol;Acc:11843]                                                   |  |
| <b>TLL2</b>    | Tolloid-like 2 [Source:HGNC Symbol;Acc:11844]                                                   |  |
| <b>TLN1</b>    | Talin 1 [Source:HGNC Symbol;Acc:11845]                                                          |  |
| <b>TLN2</b>    | Talin 2 [Source:HGNC Symbol;Acc:15447]                                                          |  |
| <b>TLR6</b>    | Toll-like receptor 6 [Source:HGNC Symbol;Acc:16711]                                             |  |
| <b>TM2D3</b>   | TM2 domain containing 3                                                                         |  |
| <b>TM4SF18</b> | Transmembrane 4 L six family member 18                                                          |  |
| <b>TM7SF3</b>  | Transmembrane 7 superfamily member 3                                                            |  |
| <b>TM9SF1</b>  | Transmembrane 9 superfamily member 1                                                            |  |
| <b>TM9SF3</b>  | Transmembrane 9 superfamily member 3                                                            |  |
| <b>TM9SF4</b>  | Transmembrane 9 superfamily protein member 4                                                    |  |
| <b>TMC1</b>    | Transmembrane channel-like 1                                                                    |  |
| <b>TMC2</b>    | Transmembrane channel-like 2                                                                    |  |
| <b>TMC4</b>    | Transmembrane channel-like 4                                                                    |  |
| <b>TMC5</b>    | Transmembrane channel-like 5                                                                    |  |
| <b>TMC8</b>    | Transmembrane channel-like 8                                                                    |  |
| <b>TMCC2</b>   | Transmembrane and coiled-coil domain family 2                                                   |  |
| <b>TMCC3</b>   | Transmembrane and coiled-coil domain family 3                                                   |  |
| <b>TMCO6</b>   | Transmembrane and coiled-coil domains 6                                                         |  |

|                 |                                                                        |  |
|-----------------|------------------------------------------------------------------------|--|
| <b>TMED10</b>   | Transmembrane emp24-like trafficking protein 10 (yeast)                |  |
| <b>TMED3</b>    | Transmembrane emp24 protein transport domain containing 3              |  |
| <b>TMED5</b>    | Transmembrane emp24 protein transport domain containing 5              |  |
| <b>TMED6</b>    | Transmembrane emp24 protein transport domain containing 6              |  |
| <b>TMEFF2</b>   | Transmembrane protein with EGF-like and two follistatin-like domains 2 |  |
| <b>TMEM101</b>  | Transmembrane protein 101                                              |  |
| <b>TMEM106A</b> | Transmembrane protein 106A                                             |  |
| <b>TMEM107</b>  | Transmembrane protein 107                                              |  |
| <b>TMEM108</b>  | Transmembrane protein 108                                              |  |
| <b>TMEM110</b>  | Transmembrane protein 110                                              |  |
| <b>TMEM116</b>  | Transmembrane protein 116                                              |  |
| <b>TMEM120B</b> | Transmembrane protein 120B                                             |  |
| <b>TMEM127</b>  | Transmembrane protein 127                                              |  |
| <b>TMEM130</b>  | Transmembrane protein 130                                              |  |
| <b>TMEM132A</b> | Transmembrane protein 132A                                             |  |
| <b>TMEM132B</b> | Transmembrane protein 132B                                             |  |
| <b>TMEM132C</b> | Transmembrane protein 132C                                             |  |
| <b>TMEM132E</b> | Transmembrane protein 132E                                             |  |
| <b>TMEM136</b>  | Transmembrane protein 136                                              |  |
| <b>TMEM147</b>  | Transmembrane protein 147                                              |  |
| <b>TMEM150A</b> | Transmembrane protein 150A                                             |  |
| <b>TMEM151B</b> | Transmembrane protein 151B                                             |  |
| <b>TMEM154</b>  | Transmembrane protein 154                                              |  |
| <b>TMEM156</b>  | Transmembrane protein 156                                              |  |
| <b>TMEM163</b>  | Transmembrane protein 163                                              |  |
| <b>TMEM164</b>  | Transmembrane protein 164                                              |  |
| <b>TMEM165</b>  | Transmembrane protein 165                                              |  |
| <b>TMEM168</b>  | Transmembrane protein 168                                              |  |
| <b>TMEM169</b>  | Transmembrane protein 169                                              |  |
| <b>TMEM170B</b> | Transmembrane protein 170B                                             |  |
| <b>TMEM173</b>  | Transmembrane protein 173                                              |  |
| <b>TMEM174</b>  | Transmembrane protein 174                                              |  |
| <b>TMEM176A</b> | Transmembrane protein 176A                                             |  |

|                 |                            |  |
|-----------------|----------------------------|--|
| <b>TMEM181</b>  | Transmembrane protein 181  |  |
| <b>TMEM183A</b> | Transmembrane protein 183A |  |
| <b>TMEM184B</b> | Transmembrane protein 184B |  |
| <b>TMEM184B</b> | Transmembrane protein 184B |  |
| <b>TMEM187</b>  | Transmembrane protein 187  |  |
| <b>TMEM188</b>  | Transmembrane protein 188  |  |
| <b>TMEM189</b>  | Transmembrane protein 189  |  |
| <b>TMEM192</b>  | Transmembrane protein 192  |  |
| <b>TMEM196</b>  | Transmembrane protein 196  |  |
| <b>TMEM20</b>   | Transmembrane protein 20   |  |
| <b>TMEM201</b>  | Transmembrane protein 201  |  |
| <b>TMEM203</b>  | Transmembrane protein 203  |  |
| <b>TMEM206</b>  | Transmembrane protein 206  |  |
| <b>TMEM208</b>  | Transmembrane protein 208  |  |
| <b>TMEM214</b>  | Transmembrane protein 214  |  |
| <b>TMEM218</b>  | Transmembrane protein 218  |  |
| <b>TMEM220</b>  | Transmembrane protein 220  |  |
| <b>TMEM229A</b> | Transmembrane protein 229A |  |
| <b>TMEM25</b>   | Transmembrane protein 25   |  |
| <b>TMEM26</b>   | Transmembrane protein 26   |  |
| <b>TMEM30A</b>  | Transmembrane protein 30A  |  |
| <b>TMEM37</b>   | Transmembrane protein 37   |  |
| <b>TMEM39A</b>  | Transmembrane protein 39A  |  |
| <b>TMEM41A</b>  | Transmembrane protein 41A  |  |
| <b>TMEM42</b>   | Transmembrane protein 42   |  |
| <b>TMEM43</b>   | Transmembrane protein 43   |  |
| <b>TMEM48</b>   | Transmembrane protein 48   |  |
| <b>TMEM49</b>   | Transmembrane protein 49   |  |
| <b>TMEM50B</b>  | Transmembrane protein 50B  |  |
| <b>TMEM63A</b>  | Transmembrane protein 63A  |  |
| <b>TMEM64</b>   | Transmembrane protein 64   |  |
| <b>TMEM68</b>   | Transmembrane protein 68   |  |
| <b>TMEM72</b>   | Transmembrane protein 72   |  |

|                  |                                                                                             |   |
|------------------|---------------------------------------------------------------------------------------------|---|
| <b>TMEM74</b>    | Transmembrane protein 74                                                                    |   |
| <b>TMEM87A</b>   | Transmembrane protein 87A                                                                   |   |
| <b>TMEM87B</b>   | Transmembrane protein 87B                                                                   |   |
| <b>TMEM8A</b>    | Transmembrane protein 8A                                                                    |   |
| <b>TMEM8B</b>    | Transmembrane protein 8B                                                                    |   |
| <b>TMEM92</b>    | Transmembrane protein 92                                                                    |   |
| <b>TMEM95</b>    | Transmembrane protein 95                                                                    |   |
| <b>TMEM98</b>    | Transmembrane protein 98                                                                    |   |
| <b>TMF1</b>      | TATA element modulatory factor 1                                                            |   |
| <b>TMOD1</b>     | Tropomodulin 1                                                                              |   |
| <b>TMOD3</b>     | Tropomodulin 3 (ubiquitous) Symbol;Acc:11873]                                               |   |
| <b>TMPRSS15</b>  | Transmembrane protease, serine 15 [Source:HGNC Symbol;Acc:9490]                             |   |
| <b>TMPRSS2</b>   | Transmembrane protease, serine 2 [Source:HGNC Symbol;Acc:11876]                             | √ |
| <b>TMPRSS6</b>   | Transmembrane protease, serine 6 [Source:HGNC Symbol;Acc:16517]                             |   |
| <b>TMTC1</b>     | Transmembrane and tetratricopeptide repeat containing 1 [Source:HGNC Symbol;Acc:24099]      |   |
| <b>TMTC2</b>     | Transmembrane and tetratricopeptide repeat containing 2 [Source:HGNC Symbol;Acc:25440]      |   |
| <b>TMTC4</b>     | Transmembrane and tetratricopeptide repeat containing 4 [Source:HGNC Symbol;Acc:25904]      |   |
| <b>TMX4</b>      | Thioredoxin-related transmembrane protein 4 [Source:HGNC Symbol;Acc:25237]                  |   |
| <b>TNC</b>       | Tenascin C [Source:HGNC Symbol;Acc:5318]                                                    |   |
| <b>TNFAIP1</b>   | Tumor necrosis factor, alpha-induced protein 1 (endothelial) [Source:HGNC Symbol;Acc:11894] |   |
| <b>TNFAIP3</b>   | Tumor necrosis factor, alpha-induced protein 3 [Source:HGNC Symbol;Acc:11896]               |   |
| <b>TNFAIP8L1</b> | Tumor necrosis factor, alpha-induced protein 8-like 1 [Source:HGNC Symbol;Acc:28279]        |   |
| <b>TNFAIP8L2</b> | Tumor necrosis factor, alpha-induced protein 8-like 2 [Source:HGNC Symbol;Acc:26277]        |   |
| <b>TNFAIP8L3</b> | Tumor necrosis factor, alpha-induced protein 8-like 3 [Source:HGNC Symbol;Acc:20620]        |   |

|                  |                                                                                                                          |   |
|------------------|--------------------------------------------------------------------------------------------------------------------------|---|
| <b>TNFRSF10D</b> | Tumor necrosis factor receptor superfamily, member 10d, decoy with truncated death domain [Source:HGNC Symbol;Acc:11907] |   |
| <b>TNFRSF11A</b> | Tumor necrosis factor receptor superfamily, member 11a, NFkB activator [Source:HGNC Symbol;Acc:11908]                    |   |
| <b>TNFRSF11B</b> | Tumor necrosis factor receptor superfamily, member 11b [Source:HGNC Symbol;Acc:11909]                                    |   |
| <b>TNFRSF14</b>  | Tumor necrosis factor receptor superfamily, member 14 (herpesvirus entry mediator) [Source:HGNC Symbol;Acc:11912]        | √ |
| <b>TNFRSF1A</b>  | Tumor necrosis factor receptor superfamily, member 1A [Source:HGNC Symbol;Acc:11916]                                     |   |
| <b>TNFRSF21</b>  | Tumor necrosis factor receptor superfamily, member 21 [Source:HGNC Symbol;Acc:13469]                                     |   |
| <b>TNFRSF25</b>  | Tumor necrosis factor receptor superfamily, member 25 [Source:HGNC Symbol;Acc:11910]                                     |   |
| <b>TNFRSF6B</b>  | Tumor necrosis factor receptor superfamily, member 6b, decoy [Source:HGNC Symbol;Acc:11921]                              |   |
| <b>TNFSF11</b>   | Tumor necrosis factor (ligand) superfamily, member 11 [Source:HGNC Symbol;Acc:11926]                                     |   |
| <b>TNFSF14</b>   | Tumor necrosis factor (ligand) superfamily, member 14 [Source:HGNC Symbol;Acc:11930]                                     |   |
| <b>TNFSF8</b>    | Tumor necrosis factor (ligand) superfamily, member 8 [Source:HGNC Symbol;Acc:11938]                                      |   |
| <b>TNIP2</b>     | TNFAIP3 interacting protein 2 [Source:HGNC Symbol;Acc:19118]                                                             |   |
| <b>TNK1</b>      | Tyrosine kinase, non-receptor, 1 [Source:HGNC Symbol;Acc:11940]                                                          |   |
| <b>TNK2</b>      | Tyrosine kinase, non-receptor, 2 [Source:HGNC Symbol;Acc:19297]                                                          |   |
| <b>TNKS</b>      | Tankyrase, TRF1-interacting ankyrin-related ADP-ribose polymerase [Source:HGNC Symbol;Acc:11941]                         |   |
| <b>TNN</b>       | Tenascin N [Source:HGNC Symbol;Acc:22942]                                                                                |   |
| <b>TNNI3</b>     | Troponin I type 3 (cardiac) [Source:HGNC Symbol;Acc:11947]                                                               |   |
| <b>TNPO1</b>     | Transportin 1 [Source:HGNC Symbol;Acc:6401]                                                                              |   |
| <b>TNPO3</b>     | Transportin 3 [Source:HGNC Symbol;Acc:17103]                                                                             |   |
| <b>TNR</b>       | Tenascin R (restrictin, janusin) [Source:HGNC Symbol;Acc:11953]                                                          |   |
| <b>TNRC18</b>    | Trinucleotide repeat containing 18 [Source:HGNC Symbol;Acc:11962]                                                        |   |

|                 |                                                                                                       |   |
|-----------------|-------------------------------------------------------------------------------------------------------|---|
| <b>TNRC6A</b>   | Trinucleotide repeat containing 6A [Source:HGNC Symbol;Acc:11969]                                     |   |
| <b>TNRC6B</b>   | Trinucleotide repeat containing 6B [Source:HGNC Symbol;Acc:29190]                                     |   |
| <b>TNRC6C</b>   | Trinucleotide repeat containing 6C [Source:HGNC Symbol;Acc:29318]                                     |   |
| <b>TNS1</b>     | Tensin 1 [Source:HGNC Symbol;Acc:11973]                                                               |   |
| <b>TNS3</b>     | Tensin 3 [Source:HGNC Symbol;Acc:21616]                                                               |   |
| <b>TNXB</b>     | Tenascin XB [Source:HGNC Symbol;Acc:11976]                                                            |   |
| <b>TOB2</b>     | Transducer of ERBB2, 2 [Source:HGNC Symbol;Acc:11980]                                                 |   |
| <b>TOE1</b>     | Target of EGR1, member 1 (nuclear) [Source:HGNC Symbol;Acc:15954]                                     |   |
| <b>TOLLIP</b>   | Toll interacting protein [Source:HGNC Symbol;Acc:16476]                                               |   |
| <b>TOM1</b>     | Target of myb1 (chicken) [Source:HGNC Symbol;Acc:11982]                                               |   |
| <b>TOM1L1</b>   | Target of myb1 (chicken)-like 1 [Source:HGNC Symbol;Acc:11983]                                        |   |
| <b>TOM1L2</b>   | Target of myb1-like 2 (chicken) [Source:HGNC Symbol;Acc:11984]                                        |   |
| <b>TOMM22</b>   | Translocase of outer mitochondrial membrane 22 homolog (yeast)<br>[Source:HGNC Symbol;Acc:18002]      |   |
| <b>TOMM34</b>   | Translocase of outer mitochondrial membrane 34 [Source:HGNC<br>Symbol;Acc:15746]                      |   |
| <b>TOMM40L</b>  | Translocase of outer mitochondrial membrane 40 homolog (yeast)-like<br>[Source:HGNC Symbol;Acc:25756] |   |
| <b>TOMM6</b>    | Translocase of outer mitochondrial membrane 6 homolog (yeast)<br>[Source:HGNC Symbol;Acc:34528]       |   |
| <b>TONSL</b>    | Tonsoku-like, DNA repair protein [Source:HGNC Symbol;Acc:7801]                                        |   |
| <b>TOP1</b>     | Topoisomerase (DNA) I [Source:HGNC Symbol;Acc:11986]                                                  | √ |
| <b>TOP1MT</b>   | Topoisomerase (DNA) I, mitochondrial [Source:HGNC Symbol;Acc:29787]                                   |   |
| <b>TOP3B</b>    | Topoisomerase (DNA) III beta [Source:HGNC Symbol;Acc:11993]                                           |   |
| <b>TOR1AIP2</b> | Torsin A interacting protein 2 [Source:HGNC Symbol;Acc:24055]                                         |   |
| <b>TOR1B</b>    | Torsin family 1, member B (torsin B) [Source:HGNC Symbol;Acc:11995]                                   |   |
| <b>TOR3A</b>    | Torsin family 3, member A [Source:HGNC Symbol;Acc:11997]                                              |   |
| <b>TOX</b>      | Thymocyte selection-associated high mobility group box [Source:HGNC<br>Symbol;Acc:18988]              |   |
| <b>TOX4</b>     | TOX high mobility group box family member 4 [Source:HGNC<br>Symbol;Acc:20161]                         |   |
| <b>TP53BP1</b>  | Tumor protein p53 binding protein 1 [Source:HGNC Symbol;Acc:11999]                                    |   |
| <b>TP53BP2</b>  | Tumor protein p53 binding protein, 2 [Source:HGNC Symbol;Acc:12000]                                   |   |



|                 |                                                                                                               |   |
|-----------------|---------------------------------------------------------------------------------------------------------------|---|
| <b>TP53INP1</b> | Tumor protein p53 inducible nuclear protein 1 [Source:HGNC Symbol;Acc:18022]                                  |   |
| <b>TPCN1</b>    | Two pore segment channel 1 [Source:HGNC Symbol;Acc:18182]                                                     |   |
| <b>TPD52L1</b>  | Tumor protein D52-like 1 [Source:HGNC Symbol;Acc:12006]                                                       |   |
| <b>TPD52L2</b>  | Tumor protein D52-like 2 [Source:HGNC Symbol;Acc:12007]                                                       |   |
| <b>TPH2</b>     | Tryptophan hydroxylase 2 [Source:HGNC Symbol;Acc:20692]                                                       |   |
| <b>TPK1</b>     | Thiamin pyrophosphokinase 1 [Source:HGNC Symbol;Acc:17358]                                                    |   |
| <b>TPM3</b>     | Tropomyosin 3 [Source:HGNC Symbol;Acc:12012]                                                                  |   |
| <b>TPMT</b>     | Thiopurine S-methyltransferase [Source:HGNC Symbol;Acc:12014]                                                 |   |
| <b>TPP1</b>     | Tripeptidyl peptidase I [Source:HGNC Symbol;Acc:2073]                                                         |   |
| <b>TPRA1</b>    | Transmembrane protein, adipocyte associated 1 [Source:HGNC Symbol;Acc:30413]                                  |   |
| <b>TPRG1</b>    | Tumor protein p63 regulated 1 [Source:HGNC Symbol;Acc:24759]                                                  |   |
| <b>TPRG1L</b>   | Tumor protein p63 regulated 1-like [Source:HGNC Symbol;Acc:27007]                                             |   |
| <b>TPRXL</b>    | Tetra-peptide repeat homeobox-like [Source:HGNC Symbol;Acc:32178]                                             |   |
| <b>TPST2</b>    | Tyrosylprotein sulfotransferase 2 [Source:HGNC Symbol;Acc:12021]                                              |   |
| <b>TPTE2P1</b>  | Transmembrane phosphoinositide 3-phosphatase and tensin homolog 2 pseudogene 1 [Source:HGNC Symbol;Acc:35196] |   |
| <b>TRA2A</b>    | Transformer 2 alpha homolog (Drosophila) [Source:HGNC Symbol;Acc:16645]                                       |   |
| <b>TRAF1</b>    | TNF receptor-associated factor 1 [Source:HGNC Symbol;Acc:12031]                                               |   |
| <b>TRAF4</b>    | TNF receptor-associated factor 4 [Source:HGNC Symbol;Acc:12034]                                               |   |
| <b>TRAF7</b>    | TNF receptor-associated factor 7 [Source:HGNC Symbol;Acc:20456]                                               | √ |
| <b>TRAK1</b>    | Trafficking protein, kinesin binding 1 [Source:HGNC Symbol;Acc:29947]                                         |   |
| <b>TRAM1L1</b>  | Translocation associated membrane protein 1-like 1 [Source:HGNC Symbol;Acc:28371]                             |   |
| <b>TRAM2</b>    | Translocation associated membrane protein 2 [Source:HGNC Symbol;Acc:16855]                                    |   |
| <b>TRANK1</b>   | Tetratricopeptide repeat and ankyrin repeat containing 1 [Source:HGNC Symbol;Acc:29011]                       |   |
| <b>TRAP1</b>    | TNF receptor-associated protein 1 [Source:HGNC Symbol;Acc:16264]                                              |   |
| <b>TRAPPC10</b> | Trafficking protein particle complex 10 [Source:HGNC Symbol;Acc:11868]                                        |   |
| <b>TRDMT1</b>   | Trna aspartic acid methyltransferase 1 [Source:HGNC Symbol;Acc:2977]                                          |   |

|                     |                                                                                      |   |
|---------------------|--------------------------------------------------------------------------------------|---|
| <b>TREML2</b>       | Triggering receptor expressed on myeloid cells-like 2 [Source:HGNC Symbol;Acc:21092] |   |
| <b>TRERF1</b>       | Transcriptional regulating factor 1 [Source:HGNC Symbol;Acc:18273]                   |   |
| <b>TREX1</b>        | Three prime repair exonuclease 1 [Source:HGNC Symbol;Acc:12269]                      |   |
| <b>TRGV3</b>        | T cell receptor gamma variable 3 [Source:HGNC Symbol;Acc:12288]                      |   |
| <b>TRGV5</b>        | T cell receptor gamma variable 5 [Source:HGNC Symbol;Acc:12290]                      |   |
| <b>TRIM10</b>       | Tripartite motif containing 10 [Source:HGNC Symbol;Acc:10072]                        |   |
| <b>TRIM11</b>       | Tripartite motif containing 11 [Source:HGNC Symbol;Acc:16281]                        |   |
| <b>TRIM13</b>       | Tripartite motif containing 13 [Source:HGNC Symbol;Acc:9976]                         |   |
| <b>TRIM14</b>       | Tripartite motif containing 14 [Source:HGNC Symbol;Acc:16283]                        |   |
| <b>TRIM17</b>       | Tripartite motif containing 17 [Source:HGNC Symbol;Acc:13430]                        |   |
| <b>TRIM22</b>       | Tripartite motif containing 22 [Source:HGNC Symbol;Acc:16379]                        |   |
| <b>TRIM23</b>       | Tripartite motif containing 23 [Source:HGNC Symbol;Acc:660]                          |   |
| <b>TRIM24</b>       | Tripartite motif containing 24 [Source:HGNC Symbol;Acc:11812]                        |   |
| <b>TRIM26</b>       | Tripartite motif containing 26 [Source:HGNC Symbol;Acc:12962]                        |   |
| <b>TRIM28</b>       | Tripartite motif containing 28 [Source:HGNC Symbol;Acc:16384]                        |   |
| <b>TRIM3</b>        | Tripartite motif containing 3 [Source:HGNC Symbol;Acc:10064]                         |   |
| <b>TRIM31</b>       | Tripartite motif containing 31 [Source:HGNC Symbol;Acc:16289]                        |   |
| <b>TRIM33</b>       | Tripartite motif containing 33 [Source:HGNC Symbol;Acc:16290]                        | √ |
| <b>TRIM34</b>       | Tripartite motif containing 34 [Source:HGNC Symbol;Acc:10063]                        |   |
| <b>TRIM35</b>       | Tripartite motif containing 35 [Source:HGNC Symbol;Acc:16285]                        |   |
| <b>TRIM37</b>       | Tripartite motif containing 37 [Source:HGNC Symbol;Acc:7523]                         |   |
| <b>TRIM39</b>       | Tripartite motif containing 39 [Source:HGNC Symbol;Acc:10065]                        |   |
| <b>TRIM39-RPP21</b> | TRIM39-RPP21 readthrough [Source:HGNC Symbol;Acc:38845]                              |   |
| <b>TRIM43</b>       | Tripartite motif containing 43 [Source:HGNC Symbol;Acc:19015]                        |   |
| <b>TRIM46</b>       | Tripartite motif containing 46 [Source:HGNC Symbol;Acc:19019]                        |   |
| <b>TRIM48</b>       | Tripartite motif containing 48 [Source:HGNC Symbol;Acc:19021]                        |   |
| <b>TRIM49</b>       | Tripartite motif containing 49 [Source:HGNC Symbol;Acc:13431]                        |   |
| <b>TRIM49L2</b>     | Tripartite motif containing 49-like 2 [Source:HGNC Symbol;Acc:38877]                 |   |
| <b>TRIM50</b>       | Tripartite motif containing 50 [Source:HGNC Symbol;Acc:19017]                        |   |
| <b>TRIM55</b>       | Tripartite motif containing 55 [Source:HGNC Symbol;Acc:14215]                        |   |
| <b>TRIM6</b>        | Tripartite motif containing 6 [Source:HGNC Symbol;Acc:16277]                         |   |

|                     |                                                                                                                      |   |
|---------------------|----------------------------------------------------------------------------------------------------------------------|---|
| <b>TRIM62</b>       | Tripartite motif containing 62 [Source:HGNC Symbol;Acc:25574]                                                        |   |
| <b>TRIM65</b>       | Tripartite motif containing 65 [Source:HGNC Symbol;Acc:27316]                                                        |   |
| <b>TRIM66</b>       | Tripartite motif containing 66 [Source:HGNC Symbol;Acc:29005]                                                        |   |
| <b>TRIM67</b>       | Tripartite motif containing 67 [Source:HGNC Symbol;Acc:31859]                                                        |   |
| <b>TRIM6-TRIM34</b> | TRIM6-TRIM34 readthrough [Source:HGNC Symbol;Acc:33440]                                                              |   |
| <b>TRIM71</b>       | Tripartite motif containing 71 [Source:HGNC Symbol;Acc:32669]                                                        |   |
| <b>TRIM72</b>       | Tripartite motif containing 72 [Source:HGNC Symbol;Acc:32671]                                                        |   |
| <b>TRIM73</b>       | Tripartite motif containing 73 [Source:HGNC Symbol;Acc:18162]                                                        |   |
| <b>TRIM74</b>       | Tripartite motif containing 74 [Source:HGNC Symbol;Acc:17453]                                                        |   |
| <b>TRIM9</b>        | Tripartite motif containing 9 [Source:HGNC Symbol;Acc:16288]                                                         |   |
| <b>TRIML2</b>       | Tripartite motif family-like 2 [Source:HGNC Symbol;Acc:26378]                                                        |   |
| <b>TRIO</b>         | Triple functional domain (PTPRF interacting) [Source:HGNC Symbol;Acc:12303]                                          |   |
| <b>TRIP11</b>       | Thyroid hormone receptor interactor 11 [Source:HGNC Symbol;Acc:12305]                                                | √ |
| <b>TRIP6</b>        | Thyroid hormone receptor interactor 6 [Source:HGNC Symbol;Acc:12311]                                                 |   |
| <b>TRIT1</b>        | Trna isopentenyltransferase 1 [Source:HGNC Symbol;Acc:20286]                                                         |   |
| <b>TRMT1L</b>       | TRM1 trna methyltransferase 1-like [Source:HGNC Symbol;Acc:16782]                                                    |   |
| <b>TRMT61A</b>      | Trna methyltransferase 61 homolog A (S. Cerevisiae) [Source:HGNC Symbol;Acc:23790]                                   |   |
| <b>TRMU</b>         | Trna 5-methylaminomethyl-2-thiouridylate methyltransferase [Source:HGNC Symbol;Acc:25481]                            |   |
| <b>TRNAU1AP</b>     | Trna selenocysteine 1 associated protein 1 [Source:HGNC Symbol;Acc:30813]                                            |   |
| <b>TRO</b>          | Trophinin [Source:HGNC Symbol;Acc:12326]                                                                             |   |
| <b>TRPA1</b>        | Transient receptor potential cation channel, subfamily A, member 1 [Source:HGNC Symbol;Acc:497]                      |   |
| <b>TRPC4AP</b>      | Transient receptor potential cation channel, subfamily C, member 4 associated protein [Source:HGNC Symbol;Acc:16181] |   |
| <b>TRPC5</b>        | Transient receptor potential cation channel, subfamily C, member 5 [Source:HGNC Symbol;Acc:12337]                    |   |

|                |                                                                                                      |   |
|----------------|------------------------------------------------------------------------------------------------------|---|
| <b>TRPM1</b>   | Transient receptor potential cation channel, subfamily M, member 1<br>[Source:HGNC Symbol;Acc:7146]  |   |
| <b>TRPM2</b>   | Transient receptor potential cation channel, subfamily M, member 2<br>[Source:HGNC Symbol;Acc:12339] |   |
| <b>TRPM3</b>   | Transient receptor potential cation channel, subfamily M, member 3<br>[Source:HGNC Symbol;Acc:17992] |   |
| <b>TRPM5</b>   | Transient receptor potential cation channel, subfamily M, member 5<br>[Source:HGNC Symbol;Acc:14323] |   |
| <b>TRPM6</b>   | Transient receptor potential cation channel, subfamily M, member 6<br>[Source:HGNC Symbol;Acc:17995] |   |
| <b>TRPM8</b>   | Transient receptor potential cation channel, subfamily M, member 8<br>[Source:HGNC Symbol;Acc:17961] |   |
| <b>TRPV2</b>   | Transient receptor potential cation channel, subfamily V, member 2<br>[Source:HGNC Symbol;Acc:18082] |   |
| <b>TRPV6</b>   | Transient receptor potential cation channel, subfamily V, member 6<br>[Source:HGNC Symbol;Acc:14006] |   |
| <b>TRRAP</b>   | Transformation/transcription domain-associated protein [Source:HGNC Symbol;Acc:12347]                | √ |
| <b>TRUB1</b>   | Trub pseudouridine (psi) synthase homolog 1 (E. Coli) [Source:HGNC Symbol;Acc:16060]                 |   |
| <b>TRUB2</b>   | Trub pseudouridine (psi) synthase homolog 2 (E. Coli) [Source:HGNC Symbol;Acc:17170]                 |   |
| <b>TSC1</b>    | Tuberous sclerosis 1 [Source:HGNC Symbol;Acc:12362]                                                  | √ |
| <b>TSC2</b>    | Tuberous sclerosis 2 [Source:HGNC Symbol;Acc:12363]                                                  |   |
| <b>TSC22D1</b> | TSC22 domain family, member 1 [Source:HGNC Symbol;Acc:16826]                                         |   |
| <b>TSC22D2</b> | TSC22 domain family, member 2 [Source:HGNC Symbol;Acc:29095]                                         |   |
| <b>TSC22D4</b> | TSC22 domain family, member 4 [Source:HGNC Symbol;Acc:21696]                                         |   |
| <b>TSEN2</b>   | Trna splicing endonuclease 2 homolog (S. Cerevisiae) [Source:HGNC Symbol;Acc:28422]                  |   |
| <b>TSEN34</b>  | Trna splicing endonuclease 34 homolog (S. Cerevisiae) [Source:HGNC Symbol;Acc:15506]                 |   |
| <b>TSEN54</b>  | Trna splicing endonuclease 54 homolog (S. Cerevisiae) [Source:HGNC Symbol;Acc:27561]                 |   |

|                 |                                                                                                   |   |
|-----------------|---------------------------------------------------------------------------------------------------|---|
| <b>TSGA14</b>   | Testis specific, 14 [Source:HGNC Symbol;Acc:12370]                                                |   |
| <b>TSHR</b>     | Thyroid stimulating hormone receptor [Source:HGNC Symbol;Acc:12373]                               | √ |
| <b>TSHZ1</b>    | Teashirt zinc finger homeobox 1 [Source:HGNC Symbol;Acc:10669]                                    |   |
| <b>TSHZ2</b>    | Teashirt zinc finger homeobox 2 [Source:HGNC Symbol;Acc:13010]                                    |   |
| <b>TSHZ3</b>    | Teashirt zinc finger homeobox 3 [Source:HGNC Symbol;Acc:30700]                                    |   |
| <b>TSKS</b>     | Testis-specific serine kinase substrate [Source:HGNC Symbol;Acc:30719]                            |   |
| <b>TSKU</b>     | Tsukushi small leucine rich proteoglycan homolog (Xenopus laevis) [Source:HGNC Symbol;Acc:28850]  |   |
| <b>TSLP</b>     | Thymic stromal lymphopoietin [Source:HGNC Symbol;Acc:30743]                                       |   |
| <b>TSNARE1</b>  | T-SNARE domain containing 1 [Source:HGNC Symbol;Acc:26437]                                        |   |
| <b>TSNAXIP1</b> | Translin-associated factor X interacting protein 1 [Source:HGNC Symbol;Acc:18586]                 |   |
| <b>TSPAN1</b>   | Tetraspanin 1 [Source:HGNC Symbol;Acc:20657]                                                      |   |
| <b>TSPAN11</b>  | Tetraspanin 11 [Source:HGNC Symbol;Acc:30795]                                                     |   |
| <b>TSPAN14</b>  | Tetraspanin 14 [Source:HGNC Symbol;Acc:23303]                                                     |   |
| <b>TSPAN17</b>  | Tetraspanin 17 [Source:HGNC Symbol;Acc:13594]                                                     |   |
| <b>TSPAN18</b>  | Tetraspanin 18 [Source:HGNC Symbol;Acc:20660]                                                     |   |
| <b>TSPAN3</b>   | Tetraspanin 3 [Source:HGNC Symbol;Acc:17752]                                                      |   |
| <b>TSPAN33</b>  | Tetraspanin 33 [Source:HGNC Symbol;Acc:28743]                                                     |   |
| <b>TSPAN8</b>   | Tetraspanin 8 [Source:HGNC Symbol;Acc:11855]                                                      |   |
| <b>TSPYL2</b>   | TSPY-like 2 [Source:HGNC Symbol;Acc:24358]                                                        |   |
| <b>TSSK1B</b>   | Testis-specific serine kinase 1B [Source:HGNC Symbol;Acc:14968]                                   |   |
| <b>TSSK2</b>    | Testis-specific serine kinase 2 [Source:HGNC Symbol;Acc:11401]                                    |   |
| <b>TSSK3</b>    | Testis-specific serine kinase 3 [Source:HGNC Symbol;Acc:15473]                                    |   |
| <b>TSSK6</b>    | Testis-specific serine kinase 6 [Source:HGNC Symbol;Acc:30410]                                    |   |
| <b>TST</b>      | Thiosulfate sulfurtransferase (rhodanese) [Source:HGNC Symbol;Acc:12388]                          |   |
| <b>TSTD2</b>    | Thiosulfate sulfurtransferase (rhodanese)-like domain containing 2 [Source:HGNC Symbol;Acc:30087] |   |
| <b>TTBK1</b>    | Tau tubulin kinase 1 [Source:HGNC Symbol;Acc:19140]                                               |   |
| <b>TTBK2</b>    | Tau tubulin kinase 2 [Source:HGNC Symbol;Acc:19141]                                               |   |
| <b>TTC1</b>     | Tetratricopeptide repeat domain 1 [Source:HGNC Symbol;Acc:12391]                                  |   |
| <b>TTC12</b>    | Tetratricopeptide repeat domain 12 [Source:HGNC Symbol;Acc:23700]                                 |   |

|               |                                                                              |  |
|---------------|------------------------------------------------------------------------------|--|
| <b>TTC17</b>  | Tetratricopeptide repeat domain 17 [Source:HGNC Symbol;Acc:25596]            |  |
| <b>TTC23</b>  | Tetratricopeptide repeat domain 23 [Source:HGNC Symbol;Acc:25730]            |  |
| <b>TTC24</b>  | Tetratricopeptide repeat domain 24 [Source:HGNC Symbol;Acc:32348]            |  |
| <b>TTC27</b>  | Tetratricopeptide repeat domain 27 [Source:HGNC Symbol;Acc:25986]            |  |
| <b>TTC3</b>   | Tetratricopeptide repeat domain 3 [Source:HGNC Symbol;Acc:12393]             |  |
| <b>TTC31</b>  | Tetratricopeptide repeat domain 31 [Source:HGNC Symbol;Acc:25759]            |  |
| <b>TTC39A</b> | Tetratricopeptide repeat domain 39A [Source:HGNC Symbol;Acc:18657]           |  |
| <b>TTC4</b>   | Tetratricopeptide repeat domain 4 [Source:HGNC Symbol;Acc:12394]             |  |
| <b>TTC7A</b>  | Tetratricopeptide repeat domain 7A [Source:HGNC Symbol;Acc:19750]            |  |
| <b>TTC7B</b>  | Tetratricopeptide repeat domain 7B [Source:HGNC Symbol;Acc:19858]            |  |
| <b>TTC9</b>   | Tetratricopeptide repeat domain 9 [Source:HGNC Symbol;Acc:20267]             |  |
| <b>TTC9B</b>  | Tetratricopeptide repeat domain 9B [Source:HGNC Symbol;Acc:26395]            |  |
| <b>TTI1</b>   | Tel2 interacting protein 1 homolog (S. Pombe) [Source:HGNC Symbol;Acc:29029] |  |
| <b>TTLL1</b>  | Tubulin tyrosine ligase-like family, member 1 [Source:HGNC Symbol;Acc:1312]  |  |
| <b>TTLL6</b>  | Tubulin tyrosine ligase-like family, member 6 [Source:HGNC Symbol;Acc:26664] |  |
| <b>TTLL7</b>  | Tubulin tyrosine ligase-like family, member 7 [Source:HGNC Symbol;Acc:26242] |  |
| <b>TTLL9</b>  | Tubulin tyrosine ligase-like family, member 9 [Source:HGNC Symbol;Acc:16118] |  |
| <b>TTN</b>    | Titin [Source:HGNC Symbol;Acc:12403]                                         |  |
| <b>TTPA</b>   | Tocopherol (alpha) transfer protein [Source:HGNC Symbol;Acc:12404]           |  |
| <b>TTPAL</b>  | Tocopherol (alpha) transfer protein-like [Source:HGNC Symbol;Acc:16114]      |  |
| <b>TTYH2</b>  | Tweety homolog 2 (Drosophila) [Source:HGNC Symbol;Acc:13877]                 |  |
| <b>TUB</b>    | Tubby homolog (mouse) [Source:HGNC Symbol;Acc:12406]                         |  |
| <b>TUBA1A</b> | Tubulin, alpha 1a [Source:HGNC Symbol;Acc:20766]                             |  |
| <b>TUBA1B</b> | Tubulin, alpha 1b [Source:HGNC Symbol;Acc:18809]                             |  |
| <b>TUBA1C</b> | Tubulin, alpha 1c [Source:HGNC Symbol;Acc:20768]                             |  |
| <b>TUBAL3</b> | Tubulin, alpha-like 3 [Source:HGNC Symbol;Acc:23534]                         |  |
| <b>TUBB1</b>  | Tubulin, beta 1 [Source:HGNC Symbol;Acc:16257]                               |  |
| <b>TUBB2A</b> | Tubulin, beta 2A [Source:HGNC Symbol;Acc:12412]                              |  |

|                  |                                                                                                |  |
|------------------|------------------------------------------------------------------------------------------------|--|
| <b>TUBB2B</b>    | Tubulin, beta 2B [Source:HGNC Symbol;Acc:30829]                                                |  |
| <b>TUBB2C</b>    | Tubulin, beta 2C [Source:HGNC Symbol;Acc:20771]                                                |  |
| <b>TUBB3</b>     | Tubulin, beta 3 [Source:HGNC Symbol;Acc:20772]                                                 |  |
| <b>TUBB4</b>     | Tubulin, beta 4 [Source:HGNC Symbol;Acc:20774]                                                 |  |
| <b>TUBB6</b>     | Tubulin, beta 6 [Source:HGNC Symbol;Acc:20776]                                                 |  |
| <b>TUBD1</b>     | Tubulin, delta 1 [Source:HGNC Symbol;Acc:16811]                                                |  |
| <b>TUBE1</b>     | Tubulin, epsilon 1 [Source:HGNC Symbol;Acc:20775]                                              |  |
| <b>TUBG2</b>     | Tubulin, gamma 2 [Source:HGNC Symbol;Acc:12419]                                                |  |
| <b>TUBGCP3</b>   | Tubulin, gamma complex associated protein 3 [Source:HGNC Symbol;Acc:18598]                     |  |
| <b>TUBGCP6</b>   | Tubulin, gamma complex associated protein 6 [Source:HGNC Symbol;Acc:18127]                     |  |
| <b>TUFM</b>      | Tu translation elongation factor, mitochondrial [Source:HGNC Symbol;Acc:12420]                 |  |
| <b>TULP3</b>     | Tubby like protein 3 [Source:HGNC Symbol;Acc:12425]                                            |  |
| <b>TUSC2</b>     | Tumor suppressor candidate 2 [Source:HGNC Symbol;Acc:17034]                                    |  |
| <b>TUSC3</b>     | Tumor suppressor candidate 3 [Source:HGNC Symbol;Acc:30242]                                    |  |
| <b>TWISTNB</b>   | TWIST neighbor [Source:HGNC Symbol;Acc:18027]                                                  |  |
| <b>TXLNA</b>     | Taxilin alpha [Source:HGNC Symbol;Acc:30685]                                                   |  |
| <b>TXLNG</b>     | Taxilin gamma [Source:HGNC Symbol;Acc:18578]                                                   |  |
| <b>TXNDC16</b>   | Thioredoxin domain containing 16 [Source:HGNC Symbol;Acc:19965]                                |  |
| <b>TXNL1</b>     | Thioredoxin-like 1 [Source:HGNC Symbol;Acc:12436]                                              |  |
| <b>TXNRD1</b>    | Thioredoxin reductase 1 [Source:HGNC Symbol;Acc:12437]                                         |  |
| <b>TXNRD3</b>    | Thioredoxin reductase 3 [Source:HGNC Symbol;Acc:20667]                                         |  |
| <b>TXNRD3IT1</b> | Thioredoxin reductase 3 intronic transcript 1 [Source:HGNC Symbol;Acc:33870]                   |  |
| <b>TYW3</b>      | Trna-yw synthesizing protein 3 homolog ( <i>S. Cerevisiae</i> ) [Source:HGNC Symbol;Acc:24757] |  |
| <b>U62631.1</b>  | CDNA: FLJ22814 fis, clone KAIA3004 [Source:uniprotkb/trembl;Acc:Q9H5X8]                        |  |
| <b>UACA</b>      | Uveal autoantigen with coiled-coil domains and ankyrin repeats [Source:HGNC Symbol;Acc:15947]  |  |

|                |                                                                                           |  |
|----------------|-------------------------------------------------------------------------------------------|--|
| <b>UAP1</b>    | UDP-N-acteylglucosamine pyrophosphorylase 1 [Source:HGNC Symbol;Acc:12457]                |  |
| <b>UBA1</b>    | Ubiquitin-like modifier activating enzyme 1 [Source:HGNC Symbol;Acc:12469]                |  |
| <b>UBA2</b>    | Ubiquitin-like modifier activating enzyme 2 [Source:HGNC Symbol;Acc:30661]                |  |
| <b>UBA3</b>    | Ubiquitin-like modifier activating enzyme 3 [Source:HGNC Symbol;Acc:12470]                |  |
| <b>UBA6</b>    | Ubiquitin-like modifier activating enzyme 6 [Source:HGNC Symbol;Acc:25581]                |  |
| <b>UBAC1</b>   | UBA domain containing 1 [Source:HGNC Symbol;Acc:30221]                                    |  |
| <b>UBAC2</b>   | UBA domain containing 2 [Source:HGNC Symbol;Acc:20486]                                    |  |
| <b>UBAP1</b>   | Ubiquitin associated protein 1 [Source:HGNC Symbol;Acc:12461]                             |  |
| <b>UBAP2L</b>  | Ubiquitin associated protein 2-like [Source:HGNC Symbol;Acc:29877]                        |  |
| <b>UBASH3A</b> | Ubiquitin associated and SH3 domain containing A [Source:HGNC Symbol;Acc:12462]           |  |
| <b>UBASH3B</b> | Ubiquitin associated and SH3 domain containing B [Source:HGNC Symbol;Acc:29884]           |  |
| <b>UBE2CBP</b> | Ubiquitin-conjugating enzyme E2C binding protein [Source:HGNC Symbol;Acc:21381]           |  |
| <b>UBE2D2</b>  | Ubiquitin-conjugating enzyme E2D 2 (UBC4/5 homolog, yeast) [Source:HGNC Symbol;Acc:12475] |  |
| <b>UBE2G1</b>  | Ubiquitin-conjugating enzyme E2G 1 (UBC7 homolog, yeast) [Source:HGNC Symbol;Acc:12482]   |  |
| <b>UBE2H</b>   | Ubiquitin-conjugating enzyme E2H (UBC8 homolog, yeast) [Source:HGNC Symbol;Acc:12484]     |  |
| <b>UBE2N</b>   | Ubiquitin-conjugating enzyme E2N (UBC13 homolog, yeast) [Source:HGNC Symbol;Acc:12492]    |  |
| <b>UBE2NL</b>  | Ubiquitin-conjugating enzyme E2N-like [Source:HGNC Symbol;Acc:31710]                      |  |
| <b>UBE2O</b>   | Ubiquitin-conjugating enzyme E2O [Source:HGNC Symbol;Acc:29554]                           |  |
| <b>UBE2QL1</b> | Ubiquitin-conjugating enzyme E2Q family-like 1 [Source:HGNC Symbol;Acc:37269]             |  |
| <b>UBE2R2</b>  | Ubiquitin-conjugating enzyme E2R 2 [Source:HGNC Symbol;Acc:19907]                         |  |



|               |                                                                                        |   |
|---------------|----------------------------------------------------------------------------------------|---|
| <b>UBE3B</b>  | Ubiquitin protein ligase E3B [Source:HGNC Symbol;Acc:13478]                            |   |
| <b>UBE3C</b>  | Ubiquitin protein ligase E3C [Source:HGNC Symbol;Acc:16803]                            |   |
| <b>UBFD1</b>  | Ubiquitin family domain containing 1 [Source:HGNC Symbol;Acc:30565]                    |   |
| <b>UBL3</b>   | Ubiquitin-like 3 [Source:HGNC Symbol;Acc:12504]                                        |   |
| <b>UBLCP1</b> | Ubiquitin-like domain containing CTD phosphatase 1 [Source:HGNC Symbol;Acc:28110]      |   |
| <b>UBN2</b>   | Ubinuclein 2 [Source:HGNC Symbol;Acc:21931]                                            |   |
| <b>UBQLN1</b> | Ubiquilin 1 [Source:HGNC Symbol;Acc:12508]                                             |   |
| <b>UBQLN2</b> | Ubiquilin 2 [Source:HGNC Symbol;Acc:12509]                                             |   |
| <b>UBR1</b>   | Ubiquitin protein ligase E3 component n-recognin 1 [Source:HGNC Symbol;Acc:16808]      |   |
| <b>UBR2</b>   | Ubiquitin protein ligase E3 component n-recognin 2 [Source:HGNC Symbol;Acc:21289]      |   |
| <b>UBR4</b>   | Ubiquitin protein ligase E3 component n-recognin 4 [Source:HGNC Symbol;Acc:30313]      |   |
| <b>UBR5</b>   | Ubiquitin protein ligase E3 component n-recognin 5 [Source:HGNC Symbol;Acc:16806]      | √ |
| <b>UBTF</b>   | Upstream binding transcription factor, RNA polymerase I [Source:HGNC Symbol;Acc:12511] |   |
| <b>UBXN10</b> | UBX domain protein 10 [Source:HGNC Symbol;Acc:26354]                                   |   |
| <b>UBXN2B</b> | UBX domain protein 2B [Source:HGNC Symbol;Acc:27035]                                   |   |
| <b>UBXN7</b>  | UBX domain protein 7 [Source:HGNC Symbol;Acc:29119]                                    |   |
| <b>UCHL5</b>  | Ubiquitin carboxyl-terminal hydrolase L5 [Source:HGNC Symbol;Acc:19678]                |   |
| <b>UCKL1</b>  | Uridine-cytidine kinase 1-like 1 [Source:HGNC Symbol;Acc:15938]                        |   |
| <b>UFD1L</b>  | Ubiquitin fusion degradation 1 like (yeast) [Source:HGNC Symbol;Acc:12520]             |   |
| <b>UFSP2</b>  | UFM1-specific peptidase 2 [Source:HGNC Symbol;Acc:25640]                               |   |
| <b>UGCG</b>   | UDP-glucose ceramide glucosyltransferase [Source:HGNC Symbol;Acc:12524]                |   |
| <b>UGGT1</b>  | UDP-glucose glycoprotein glucosyltransferase 1 [Source:HGNC Symbol;Acc:15663]          |   |

|                 |                                                                                      |  |
|-----------------|--------------------------------------------------------------------------------------|--|
| <b>UGGT2</b>    | UDP-glucose glycoprotein glucosyltransferase 2 [Source:HGNC Symbol;Acc:15664]        |  |
| <b>UGT1A1</b>   | UDP glucuronosyltransferase 1 family, polypeptide A1 [Source:HGNC Symbol;Acc:12530]  |  |
| <b>UGT1A10</b>  | UDP glucuronosyltransferase 1 family, polypeptide A10 [Source:HGNC Symbol;Acc:12531] |  |
| <b>UGT1A3</b>   | UDP glucuronosyltransferase 1 family, polypeptide A3 [Source:HGNC Symbol;Acc:12535]  |  |
| <b>UGT1A4</b>   | UDP glucuronosyltransferase 1 family, polypeptide A4 [Source:HGNC Symbol;Acc:12536]  |  |
| <b>UGT1A5</b>   | UDP glucuronosyltransferase 1 family, polypeptide A5 [Source:HGNC Symbol;Acc:12537]  |  |
| <b>UGT1A6</b>   | UDP glucuronosyltransferase 1 family, polypeptide A6 [Source:HGNC Symbol;Acc:12538]  |  |
| <b>UGT1A7</b>   | UDP glucuronosyltransferase 1 family, polypeptide A7 [Source:HGNC Symbol;Acc:12539]  |  |
| <b>UGT1A8</b>   | UDP glucuronosyltransferase 1 family, polypeptide A8 [Source:HGNC Symbol;Acc:12540]  |  |
| <b>UGT1A9</b>   | UDP glucuronosyltransferase 1 family, polypeptide A9 [Source:HGNC Symbol;Acc:12541]  |  |
| <b>UGT2A3</b>   | UDP glucuronosyltransferase 2 family, polypeptide A3 [Source:HGNC Symbol;Acc:28528]  |  |
| <b>UGT2B4</b>   | UDP glucuronosyltransferase 2 family, polypeptide B4 [Source:HGNC Symbol;Acc:12553]  |  |
| <b>UGT3A1</b>   | UDP glycosyltransferase 3 family, polypeptide A1 [Source:HGNC Symbol;Acc:26625]      |  |
| <b>UGT8</b>     | UDP glycosyltransferase 8 [Source:HGNC Symbol;Acc:12555]                             |  |
| <b>UHMK1</b>    | U2AF homology motif (UHM) kinase 1 [Source:HGNC Symbol;Acc:19683]                    |  |
| <b>UHRF1</b>    | Ubiquitin-like with PHD and ring finger domains 1 [Source:HGNC Symbol;Acc:12556]     |  |
| <b>UHRF1BP1</b> | UHRF1 binding protein 1 [Source:HGNC Symbol;Acc:21216]                               |  |
| <b>ULBP1</b>    | UL16 binding protein 1 [Source:HGNC Symbol;Acc:14893]                                |  |

|               |                                                                                            |  |
|---------------|--------------------------------------------------------------------------------------------|--|
| <b>ULBP2</b>  | UL16 binding protein 2 [Source:HGNC Symbol;Acc:14894]                                      |  |
| <b>ULK1</b>   | Unc-51-like kinase 1 ( <i>C. Elegans</i> ) [Source:HGNC Symbol;Acc:12558]                  |  |
| <b>ULK3</b>   | Unc-51-like kinase 3 ( <i>C. Elegans</i> ) [Source:HGNC Symbol;Acc:19703]                  |  |
| <b>ULK4</b>   | Unc-51-like kinase 4 ( <i>C. Elegans</i> ) [Source:HGNC Symbol;Acc:15784]                  |  |
| <b>UNC13A</b> | Unc-13 homolog A ( <i>C. Elegans</i> ) [Source:HGNC Symbol;Acc:23150]                      |  |
| <b>UNC45B</b> | Unc-45 homolog B ( <i>C. Elegans</i> ) [Source:HGNC Symbol;Acc:14304]                      |  |
| <b>UNC5A</b>  | Unc-5 homolog A ( <i>C. Elegans</i> ) [Source:HGNC Symbol;Acc:12567]                       |  |
| <b>UNC5B</b>  | Unc-5 homolog B ( <i>C. Elegans</i> ) [Source:HGNC Symbol;Acc:12568]                       |  |
| <b>UNC5C</b>  | Unc-5 homolog C ( <i>C. Elegans</i> ) [Source:HGNC Symbol;Acc:12569]                       |  |
| <b>UNC5CL</b> | Unc-5 homolog C ( <i>C. Elegans</i> )-like [Source:HGNC Symbol;Acc:21203]                  |  |
| <b>UNC80</b>  | Unc-80 homolog ( <i>C. Elegans</i> ) [Source:HGNC Symbol;Acc:26582]                        |  |
| <b>UNG</b>    | Uracil-DNA glycosylase [Source:HGNC Symbol;Acc:12572]                                      |  |
| <b>UNKL</b>   | Unkempt homolog ( <i>Drosophila</i> )-like [Source:HGNC Symbol;Acc:14184]                  |  |
| <b>UPB1</b>   | Ureidopropionase, beta [Source:HGNC Symbol;Acc:16297]                                      |  |
| <b>UPF3A</b>  | UPF3 regulator of nonsense transcripts homolog A (yeast) [Source:HGNC Symbol;Acc:20332]    |  |
| <b>UQCC</b>   | Ubiquinol-cytochrome c reductase complex chaperone [Source:HGNC Symbol;Acc:15891]          |  |
| <b>UQCR11</b> | Ubiquinol-cytochrome c reductase, complex III subunit XI [Source:HGNC Symbol;Acc:30862]    |  |
| <b>UQCRB</b>  | Ubiquinol-cytochrome c reductase binding protein [Source:HGNC Symbol;Acc:12582]            |  |
| <b>UQCRC1</b> | Ubiquinol-cytochrome c reductase core protein I [Source:HGNC Symbol;Acc:12585]             |  |
| <b>UQCRC2</b> | Ubiquinol-cytochrome c reductase core protein II [Source:HGNC Symbol;Acc:12586]            |  |
| <b>URB1</b>   | URB1 ribosome biogenesis 1 homolog ( <i>S. Cerevisiae</i> ) [Source:HGNC Symbol;Acc:17344] |  |
| <b>URGCP</b>  | Upregulator of cell proliferation [Source:HGNC Symbol;Acc:30890]                           |  |
| <b>UROD</b>   | Uroporphyrinogen decarboxylase [Source:HGNC Symbol;Acc:12591]                              |  |
| <b>USH1G</b>  | Usher syndrome 1G (autosomal recessive) [Source:HGNC Symbol;Acc:16356]                     |  |

|                |                                                                                                |  |
|----------------|------------------------------------------------------------------------------------------------|--|
| <b>USH2A</b>   | Usher syndrome 2A (autosomal recessive, mild) [Source:HGNC Symbol;Acc:12601]                   |  |
| <b>USHBP1</b>  | Usher syndrome 1C binding protein 1 [Source:HGNC Symbol;Acc:24058]                             |  |
| <b>USO1</b>    | USO1 vesicle docking protein homolog (yeast) [Source:HGNC Symbol;Acc:30904]                    |  |
| <b>USP11</b>   | Ubiquitin specific peptidase 11 [Source:HGNC Symbol;Acc:12609]                                 |  |
| <b>USP13</b>   | Ubiquitin specific peptidase 13 (isopeptidase T-3) [Source:HGNC Symbol;Acc:12611]              |  |
| <b>USP14</b>   | Ubiquitin specific peptidase 14 (trna-guanine transglycosylase) [Source:HGNC Symbol;Acc:12612] |  |
| <b>USP16</b>   | Ubiquitin specific peptidase 16 [Source:HGNC Symbol;Acc:12614]                                 |  |
| <b>USP17L2</b> | Ubiquitin specific peptidase 17-like 2 [Source:HGNC Symbol;Acc:34434]                          |  |
| <b>USP19</b>   | Ubiquitin specific peptidase 19 [Source:HGNC Symbol;Acc:12617]                                 |  |
| <b>USP2</b>    | Ubiquitin specific peptidase 2 [Source:HGNC Symbol;Acc:12618]                                  |  |
| <b>USP20</b>   | Ubiquitin specific peptidase 20 [Source:HGNC Symbol;Acc:12619]                                 |  |
| <b>USP22</b>   | Ubiquitin specific peptidase 22 [Source:HGNC Symbol;Acc:12621]                                 |  |
| <b>USP24</b>   | Ubiquitin specific peptidase 24 [Source:HGNC Symbol;Acc:12623]                                 |  |
| <b>USP25</b>   | Ubiquitin specific peptidase 25 [Source:HGNC Symbol;Acc:12624]                                 |  |
| <b>USP26</b>   | Ubiquitin specific peptidase 26 [Source:HGNC Symbol;Acc:13485]                                 |  |
| <b>USP28</b>   | Ubiquitin specific peptidase 28 [Source:HGNC Symbol;Acc:12625]                                 |  |
| <b>USP3</b>    | Ubiquitin specific peptidase 3 [Source:HGNC Symbol;Acc:12626]                                  |  |
| <b>USP30</b>   | Ubiquitin specific peptidase 30 [Source:HGNC Symbol;Acc:20065]                                 |  |
| <b>USP31</b>   | Ubiquitin specific peptidase 31 [Source:HGNC Symbol;Acc:20060]                                 |  |
| <b>USP32</b>   | Ubiquitin specific peptidase 32 [Source:HGNC Symbol;Acc:19143]                                 |  |
| <b>USP33</b>   | Ubiquitin specific peptidase 33 [Source:HGNC Symbol;Acc:20059]                                 |  |
| <b>USP34</b>   | Ubiquitin specific peptidase 34 [Source:HGNC Symbol;Acc:20066]                                 |  |
| <b>USP35</b>   | Ubiquitin specific peptidase 35 [Source:HGNC Symbol;Acc:20061]                                 |  |
| <b>USP36</b>   | Ubiquitin specific peptidase 36 [Source:HGNC Symbol;Acc:20062]                                 |  |
| <b>USP37</b>   | Ubiquitin specific peptidase 37 [Source:HGNC Symbol;Acc:20063]                                 |  |
| <b>USP38</b>   | Ubiquitin specific peptidase 38 [Source:HGNC Symbol;Acc:20067]                                 |  |
| <b>USP40</b>   | Ubiquitin specific peptidase 40 [Source:HGNC Symbol;Acc:20069]                                 |  |
| <b>USP42</b>   | Ubiquitin specific peptidase 42 [Source:HGNC Symbol;Acc:20068]                                 |  |
| <b>USP43</b>   | Ubiquitin specific peptidase 43 [Source:HGNC Symbol;Acc:20072]                                 |  |

|               |                                                                                                        |  |
|---------------|--------------------------------------------------------------------------------------------------------|--|
| <b>USP44</b>  | Ubiquitin specific peptidase 44 [Source:HGNC Symbol;Acc:20064]                                         |  |
| <b>USP45</b>  | Ubiquitin specific peptidase 45 [Source:HGNC Symbol;Acc:20080]                                         |  |
| <b>USP46</b>  | Ubiquitin specific peptidase 46 [Source:HGNC Symbol;Acc:20075]                                         |  |
| <b>USP47</b>  | Ubiquitin specific peptidase 47 [Source:HGNC Symbol;Acc:20076]                                         |  |
| <b>USP48</b>  | Ubiquitin specific peptidase 48 [Source:HGNC Symbol;Acc:18533]                                         |  |
| <b>USP54</b>  | Ubiquitin specific peptidase 54 [Source:HGNC Symbol;Acc:23513]                                         |  |
| <b>USP7</b>   | Ubiquitin specific peptidase 7 (herpes virus-associated) [Source:HGNC Symbol;Acc:12630]                |  |
| <b>USP8</b>   | Ubiquitin specific peptidase 8 [Source:HGNC Symbol;Acc:12631]                                          |  |
| <b>USP9Y</b>  | Ubiquitin specific peptidase 9, Y-linked [Source:HGNC Symbol;Acc:12633]                                |  |
| <b>UTP15</b>  | UTP15, U3 small nucleolar ribonucleoprotein, homolog (S. Cerevisiae) [Source:HGNC Symbol;Acc:25758]    |  |
| <b>UTP20</b>  | UTP20, small subunit (SSU) processome component, homolog (yeast) [Source:HGNC Symbol;Acc:17897]        |  |
| <b>UTP23</b>  | UTP23, small subunit (SSU) processome component, homolog (yeast) [Source:HGNC Symbol;Acc:28224]        |  |
| <b>UTP3</b>   | UTP3, small subunit (SSU) processome component, homolog (S. Cerevisiae) [Source:HGNC Symbol;Acc:24477] |  |
| <b>UTP6</b>   | UTP6, small subunit (SSU) processome component, homolog (yeast) [Source:HGNC Symbol;Acc:18279]         |  |
| <b>UTRN</b>   | Utrophin [Source:HGNC Symbol;Acc:12635]                                                                |  |
| <b>VAC14</b>  | Vac14 homolog (S. Cerevisiae) [Source:HGNC Symbol;Acc:25507]                                           |  |
| <b>VANGL1</b> | Vang-like 1 (van gogh, Drosophila) [Source:HGNC Symbol;Acc:15512]                                      |  |
| <b>VANGL2</b> | Vang-like 2 (van gogh, Drosophila) [Source:HGNC Symbol;Acc:15511]                                      |  |
| <b>VAPB</b>   | VAMP (vesicle-associated membrane protein)-associated protein B and C [Source:HGNC Symbol;Acc:12649]   |  |
| <b>VARS2</b>  | Valyl-trna synthetase 2, mitochondrial (putative) [Source:HGNC Symbol;Acc:21642]                       |  |
| <b>VASH2</b>  | Vasohibin 2 [Source:HGNC Symbol;Acc:25723]                                                             |  |
| <b>VASN</b>   | Vasorin [Source:HGNC Symbol;Acc:18517]                                                                 |  |
| <b>VAT1</b>   | Vesicle amine transport protein 1 homolog (T. Californica) [Source:HGNC Symbol;Acc:16919]              |  |

|               |                                                                                                   |   |
|---------------|---------------------------------------------------------------------------------------------------|---|
| <b>VAV2</b>   | Vav 2 guanine nucleotide exchange factor [Source:HGNC Symbol;Acc:12658]                           |   |
| <b>VCAM1</b>  | Vascular cell adhesion molecule 1 [Source:HGNC Symbol;Acc:12663]                                  |   |
| <b>VCAN</b>   | Versican [Source:HGNC Symbol;Acc:2464]                                                            |   |
| <b>VCL</b>    | Vinculin [Source:HGNC Symbol;Acc:12665]                                                           |   |
| <b>VCP</b>    | Valosin containing protein [Source:HGNC Symbol;Acc:12666]                                         |   |
| <b>VCPIP1</b> | Valosin containing protein (p97)/p47 complex interacting protein 1 [Source:HGNC Symbol;Acc:30897] |   |
| <b>VDAC1</b>  | Voltage-dependent anion channel 1 [Source:HGNC Symbol;Acc:12669]                                  |   |
| <b>VEGFA</b>  | Vascular endothelial growth factor A [Source:HGNC Symbol;Acc:12680]                               |   |
| <b>VEGFC</b>  | Vascular endothelial growth factor C [Source:HGNC Symbol;Acc:12682]                               |   |
| <b>VENTX</b>  | VENT homeobox homolog (Xenopus laevis) [Source:HGNC Symbol;Acc:13639]                             |   |
| <b>VEZF1</b>  | Vascular endothelial zinc finger 1 [Source:HGNC Symbol;Acc:12949]                                 |   |
| <b>VEZT</b>   | Vezatin, adherens junctions transmembrane protein [Source:HGNC Symbol;Acc:18258]                  |   |
| <b>VGLL1</b>  | Vestigial like 1 (Drosophila) [Source:HGNC Symbol;Acc:20985]                                      |   |
| <b>VGLL3</b>  | Vestigial like 3 (Drosophila) [Source:HGNC Symbol;Acc:24327]                                      |   |
| <b>VGLL4</b>  | Vestigial like 4 (Drosophila) [Source:HGNC Symbol;Acc:28966]                                      |   |
| <b>VHL</b>    | Von Hippel-Lindau tumor suppressor [Source:HGNC Symbol;Acc:12687]                                 | √ |
| <b>VIL1</b>   | Villin 1 [Source:HGNC Symbol;Acc:12690]                                                           |   |
| <b>VIPR1</b>  | Vasoactive intestinal peptide receptor 1 [Source:HGNC Symbol;Acc:12694]                           |   |
| <b>VLDLR</b>  | Very low density lipoprotein receptor [Source:HGNC Symbol;Acc:12698]                              |   |
| <b>VMAC</b>   | Vimentin-type intermediate filament associated coiled-coil protein [Source:HGNC Symbol;Acc:33803] |   |
| <b>VN1R6P</b> | Vomeronasal 1 receptor 6 pseudogene [Source:HGNC Symbol;Acc:13712]                                |   |
| <b>VNN1</b>   | Vanin 1 [Source:HGNC Symbol;Acc:12705]                                                            |   |
| <b>VNN2</b>   | Vanin 2 [Source:HGNC Symbol;Acc:12706]                                                            |   |
| <b>VNN3</b>   | Vanin 3 [Source:HGNC Symbol;Acc:16431]                                                            |   |
| <b>VOPP1</b>  | Vesicular, overexpressed in cancer, prosurvival protein 1 [Source:HGNC Symbol;Acc:34518]          |   |
| <b>VPS13B</b> | Vacuolar protein sorting 13 homolog B (yeast) [Source:HGNC Symbol;Acc:2183]                       |   |

|               |                                                                                               |  |
|---------------|-----------------------------------------------------------------------------------------------|--|
| <b>VPS13C</b> | Vacuolar protein sorting 13 homolog C ( <i>S. Cerevisiae</i> ) [Source:HGNC Symbol;Acc:23594] |  |
| <b>VPS13D</b> | Vacuolar protein sorting 13 homolog D ( <i>S. Cerevisiae</i> ) [Source:HGNC Symbol;Acc:23595] |  |
| <b>VPS16</b>  | Vacuolar protein sorting 16 homolog ( <i>S. Cerevisiae</i> ) [Source:HGNC Symbol;Acc:14584]   |  |
| <b>VPS18</b>  | Vacuolar protein sorting 18 homolog ( <i>S. Cerevisiae</i> ) [Source:HGNC Symbol;Acc:15972]   |  |
| <b>VPS26B</b> | Vacuolar protein sorting 26 homolog B ( <i>S. Pombe</i> ) [Source:HGNC Symbol;Acc:28119]      |  |
| <b>VPS33A</b> | Vacuolar protein sorting 33 homolog A ( <i>S. Cerevisiae</i> ) [Source:HGNC Symbol;Acc:18179] |  |
| <b>VPS37C</b> | Vacuolar protein sorting 37 homolog C ( <i>S. Cerevisiae</i> ) [Source:HGNC Symbol;Acc:26097] |  |
| <b>VPS39</b>  | Vacuolar protein sorting 39 homolog ( <i>S. Cerevisiae</i> ) [Source:HGNC Symbol;Acc:20593]   |  |
| <b>VPS4A</b>  | Vacuolar protein sorting 4 homolog A ( <i>S. Cerevisiae</i> ) [Source:HGNC Symbol;Acc:13488]  |  |
| <b>VPS52</b>  | Vacuolar protein sorting 52 homolog ( <i>S. Cerevisiae</i> ) [Source:HGNC Symbol;Acc:10518]   |  |
| <b>VPS54</b>  | Vacuolar protein sorting 54 homolog ( <i>S. Cerevisiae</i> ) [Source:HGNC Symbol;Acc:18652]   |  |
| <b>VRK1</b>   | Vaccinia related kinase 1 [Source:HGNC Symbol;Acc:12718]                                      |  |
| <b>VRK2</b>   | Vaccinia related kinase 2 [Source:HGNC Symbol;Acc:12719]                                      |  |
| <b>VSIG8</b>  | V-set and immunoglobulin domain containing 8 [Source:HGNC Symbol;Acc:32063]                   |  |
| <b>VSTM2A</b> | V-set and transmembrane domain containing 2A [Source:HGNC Symbol;Acc:28499]                   |  |
| <b>VTA1</b>   | Vps20-associated 1 homolog ( <i>S. Cerevisiae</i> ) [Source:HGNC Symbol;Acc:20954]            |  |
| <b>VTCN1</b>  | V-set domain containing T cell activation inhibitor 1 [Source:HGNC Symbol;Acc:28873]          |  |

|                |                                                                                   |  |
|----------------|-----------------------------------------------------------------------------------|--|
| <b>VWA2</b>    | Von Willebrand factor A domain containing 2 [Source:HGNC Symbol;Acc:24709]        |  |
| <b>VWA3B</b>   | Von Willebrand factor A domain containing 3B [Source:HGNC Symbol;Acc:28385]       |  |
| <b>VWA5A</b>   | Von Willebrand factor A domain containing 5A [Source:HGNC Symbol;Acc:6658]        |  |
| <b>VWA5B1</b>  | Von Willebrand factor A domain containing 5B1 [Source:HGNC Symbol;Acc:26538]      |  |
| <b>VWCE</b>    | Von Willebrand factor C and EGF domains [Source:HGNC Symbol;Acc:26487]            |  |
| <b>VWF</b>     | Von Willebrand factor [Source:HGNC Symbol;Acc:12726]                              |  |
| <b>WAPAL</b>   | Wings apart-like homolog (Drosophila) [Source:HGNC Symbol;Acc:23293]              |  |
| <b>WBSCR16</b> | Williams-Beuren syndrome chromosome region 16 [Source:HGNC Symbol;Acc:14948]      |  |
| <b>WBSCR17</b> | Williams-Beuren syndrome chromosome region 17 [Source:HGNC Symbol;Acc:16347]      |  |
| <b>WDFY1</b>   | WD repeat and FYVE domain containing 1 [Source:HGNC Symbol;Acc:20451]             |  |
| <b>WDFY4</b>   | WDFY family member 4 [Source:HGNC Symbol;Acc:29323]                               |  |
| <b>WDPCP</b>   | WD repeat containing planar cell polarity effector [Source:HGNC Symbol;Acc:28027] |  |
| <b>WDR11</b>   | WD repeat domain 11 [Source:HGNC Symbol;Acc:13831]                                |  |
| <b>WDR12</b>   | WD repeat domain 12 [Source:HGNC Symbol;Acc:14098]                                |  |
| <b>WDR19</b>   | WD repeat domain 19 [Source:HGNC Symbol;Acc:18340]                                |  |
| <b>WDR20</b>   | WD repeat domain 20 [Source:HGNC Symbol;Acc:19667]                                |  |
| <b>WDR27</b>   | WD repeat domain 27 [Source:HGNC Symbol;Acc:21248]                                |  |
| <b>WDR3</b>    | WD repeat domain 3 [Source:HGNC Symbol;Acc:12755]                                 |  |
| <b>WDR33</b>   | WD repeat domain 33 [Source:HGNC Symbol;Acc:25651]                                |  |
| <b>WDR34</b>   | WD repeat domain 34 [Source:HGNC Symbol;Acc:28296]                                |  |
| <b>WDR35</b>   | WD repeat domain 35 [Source:HGNC Symbol;Acc:29250]                                |  |
| <b>WDR36</b>   | WD repeat domain 36 [Source:HGNC Symbol;Acc:30696]                                |  |
| <b>WDR37</b>   | WD repeat domain 37 [Source:HGNC Symbol;Acc:31406]                                |  |
| <b>WDR4</b>    | WD repeat domain 4 [Source:HGNC Symbol;Acc:12756]                                 |  |



|                |                                                                                                              |   |
|----------------|--------------------------------------------------------------------------------------------------------------|---|
| <b>WDR41</b>   | WD repeat domain 41 [Source:HGNC Symbol;Acc:25601]                                                           |   |
| <b>WDR44</b>   | WD repeat domain 44 [Source:HGNC Symbol;Acc:30512]                                                           |   |
| <b>WDR46</b>   | WD repeat domain 46 [Source:HGNC Symbol;Acc:13923]                                                           |   |
| <b>WDR47</b>   | WD repeat domain 47 [Source:HGNC Symbol;Acc:29141]                                                           |   |
| <b>WDR54</b>   | WD repeat domain 54 [Source:HGNC Symbol;Acc:25770]                                                           |   |
| <b>WDR55</b>   | WD repeat domain 55 [Source:HGNC Symbol;Acc:25971]                                                           |   |
| <b>WDR60</b>   | WD repeat domain 60 [Source:HGNC Symbol;Acc:21862]                                                           |   |
| <b>WDR65</b>   | WD repeat domain 65 [Source:HGNC Symbol;Acc:26485]                                                           |   |
| <b>WDR66</b>   | WD repeat domain 66 [Source:HGNC Symbol;Acc:28506]                                                           |   |
| <b>WDR67</b>   | WD repeat domain 67 [Source:HGNC Symbol;Acc:30888]                                                           |   |
| <b>WDR7</b>    | WD repeat domain 7 [Source:HGNC Symbol;Acc:13490]                                                            |   |
| <b>WDR77</b>   | WD repeat domain 77 [Source:HGNC Symbol;Acc:29652]                                                           |   |
| <b>WDR78</b>   | WD repeat domain 78 [Source:HGNC Symbol;Acc:26252]                                                           |   |
| <b>WDR8</b>    | WD repeat domain 8 [Source:HGNC Symbol;Acc:12759]                                                            |   |
| <b>WDR81</b>   | WD repeat domain 81 [Source:HGNC Symbol;Acc:26600]                                                           |   |
| <b>WDR86</b>   | WD repeat domain 86 [Source:HGNC Symbol;Acc:28020]                                                           |   |
| <b>WDR88</b>   | WD repeat domain 88 [Source:HGNC Symbol;Acc:26999]                                                           |   |
| <b>WDR91</b>   | WD repeat domain 91 [Source:HGNC Symbol;Acc:24997]                                                           |   |
| <b>WDR96</b>   | WD repeat domain 96 [Source:HGNC Symbol;Acc:26684]                                                           |   |
| <b>WDTC1</b>   | WD and tetratricopeptide repeats 1 [Source:HGNC Symbol;Acc:29175]                                            |   |
| <b>WDYHV1</b>  | WDYHV motif containing 1 [Source:HGNC Symbol;Acc:25490]                                                      |   |
| <b>WEE1</b>    | WEE1 homolog (S. Pombe) [Source:HGNC Symbol;Acc:12761]                                                       |   |
| <b>WFDC8</b>   | WAP four-disulfide core domain 8 [Source:HGNC Symbol;Acc:16163]                                              |   |
| <b>WFIKKN2</b> | WAP, follistatin/kazal, immunoglobulin, kunitz and netrin domain containing 2 [Source:HGNC Symbol;Acc:30916] |   |
| <b>WFS1</b>    | Wolfram syndrome 1 (wolframin) [Source:HGNC Symbol;Acc:12762]                                                |   |
| <b>WHSC1</b>   | Wolf-Hirschhorn syndrome candidate 1                                                                         | √ |
| <b>WHSC1L1</b> | Wolf-Hirschhorn syndrome candidate 1-like 1                                                                  | √ |
| <b>WIPI2</b>   | WD repeat domain, phosphoinositide interacting 2 [Source:HGNC Symbol;Acc:32225]                              |   |
| <b>WISP3</b>   | WNT1 inducible signaling pathway protein 3 [Source:HGNC Symbol;Acc:12771]                                    |   |
| <b>WIZ</b>     | Widely interspaced zinc finger motifs [Source:HGNC Symbol;Acc:30917]                                         |   |

|               |                                                                                      |   |
|---------------|--------------------------------------------------------------------------------------|---|
| <b>WLS</b>    | Wntless homolog (Drosophila) [Source:HGNC Symbol;Acc:30238]                          |   |
| <b>WNK1</b>   | WNK lysine deficient protein kinase 1 [Source:HGNC Symbol;Acc:14540]                 |   |
| <b>WNK2</b>   | WNK lysine deficient protein kinase 2 [Source:HGNC Symbol;Acc:14542]                 |   |
| <b>WNK3</b>   | WNK lysine deficient protein kinase 3 [Source:HGNC Symbol;Acc:14543]                 |   |
| <b>WNK4</b>   | WNK lysine deficient protein kinase 4 [Source:HGNC Symbol;Acc:14544]                 |   |
| <b>WNT16</b>  | Wingless-type MMTV integration site family, member 16 [Source:HGNC Symbol;Acc:16267] |   |
| <b>WNT2B</b>  | Wingless-type MMTV integration site family, member 2B [Source:HGNC Symbol;Acc:12781] |   |
| <b>WNT7A</b>  | Wingless-type MMTV integration site family, member 7A [Source:HGNC Symbol;Acc:12786] |   |
| <b>WNT8A</b>  | Wingless-type MMTV integration site family, member 8A [Source:HGNC Symbol;Acc:12788] |   |
| <b>WNT9A</b>  | Wingless-type MMTV integration site family, member 9A [Source:HGNC Symbol;Acc:12778] |   |
| <b>WNT9B</b>  | Wingless-type MMTV integration site family, member 9B [Source:HGNC Symbol;Acc:12779] |   |
| <b>WRAP53</b> | WD repeat containing, antisense to TP53 [Source:HGNC Symbol;Acc:25522]               |   |
| <b>WRN</b>    | Werner syndrome, recq helicase-like                                                  | √ |
| <b>WRNIP1</b> | Werner helicase interacting protein 1 [Source:HGNC Symbol;Acc:20876]                 |   |
| <b>WSB1</b>   | WD repeat and SOCS box containing 1 [Source:HGNC Symbol;Acc:19221]                   |   |
| <b>WSCD1</b>  | WSC domain containing 1 [Source:HGNC Symbol;Acc:29060]                               |   |
| <b>WSCD2</b>  | WSC domain containing 2 [Source:HGNC Symbol;Acc:29117]                               |   |
| <b>WTAP</b>   | Wilms tumor 1 associated protein [Source:HGNC Symbol;Acc:16846]                      |   |
| <b>WWC1</b>   | WW and C2 domain containing 1 [Source:HGNC Symbol;Acc:29435]                         |   |
| <b>WWC2</b>   | WW and C2 domain containing 2 [Source:HGNC Symbol;Acc:24148]                         |   |
| <b>WWC3</b>   | WWC family member 3 [Source:HGNC Symbol;Acc:29237]                                   |   |
| <b>WWOX</b>   | WW domain containing oxidoreductase [Source:HGNC Symbol;Acc:12799]                   |   |
| <b>WWP1</b>   | WW domain containing E3 ubiquitin protein ligase 1 [Source:HGNC Symbol;Acc:17004]    |   |

|                        |                                                                                                       |   |
|------------------------|-------------------------------------------------------------------------------------------------------|---|
| <b>WWP2</b>            | WW domain containing E3 ubiquitin protein ligase 2 [Source:HGNC Symbol;Acc:16804]                     |   |
| <b>WWTR1</b>           | WW domain containing transcription regulator 1                                                        | √ |
| <b>XAGE3</b>           | X antigen family, member 3 [Source:HGNC Symbol;Acc:14618]                                             |   |
| <b>XCR1</b>            | Chemokine (C motif) receptor 1 [Source:HGNC Symbol;Acc:1625]                                          |   |
| <b>XDH</b>             | Xanthine dehydrogenase [Source:HGNC Symbol;Acc:12805]                                                 |   |
| <b>XG</b>              | Xg blood group [Source:HGNC Symbol;Acc:12806]                                                         |   |
| <b>XIAP</b>            | X-linked inhibitor of apoptosis [Source:HGNC Symbol;Acc:592]                                          |   |
| <b>XIRP1</b>           | Xin actin-binding repeat containing 1 [Source:HGNC Symbol;Acc:14301]                                  |   |
| <b>XIRP2</b>           | Xin actin-binding repeat containing 2 [Source:HGNC Symbol;Acc:14303]                                  |   |
| <b>XKR4</b>            | XK, Kell blood group complex subunit-related family, member 4 [Source:HGNC Symbol;Acc:29394]          |   |
| <b>XPNPEP3</b>         | X-prolyl aminopeptidase (aminopeptidase P) 3, putative [Source:HGNC Symbol;Acc:28052]                 |   |
| <b>XPO4</b>            | Exportin 4 [Source:HGNC Symbol;Acc:17796]                                                             |   |
| <b>XPO5</b>            | Exportin 5 [Source:HGNC Symbol;Acc:17675]                                                             |   |
| <b>XPO7</b>            | Exportin 7 [Source:HGNC Symbol;Acc:14108]                                                             |   |
| <b>XPOT</b>            | Exportin, trna (nuclear export receptor for trnas) [Source:HGNC Symbol;Acc:12826]                     |   |
| <b>XPR1</b>            | Xenotropic and polytropic retrovirus receptor 1 [Source:HGNC Symbol;Acc:12827]                        |   |
| <b>XRCC2</b>           | X-ray repair complementing defective repair in Chinese hamster cells 2 [Source:HGNC Symbol;Acc:12829] |   |
| <b>XRRA1</b>           | X-ray radiation resistance associated 1 [Source:HGNC Symbol;Acc:18868]                                |   |
| <b>XXbac-B461K10.4</b> | Protein MICAL-3 isoform 1 [Source:refseq peptide;Acc:NP_056056]                                       |   |
| <b>XYLB</b>            | Xylulokinase homolog (H. Influenzae) [Source:HGNC Symbol;Acc:12839]                                   |   |
| <b>XYLT1</b>           | Xylosyltransferase I [Source:HGNC Symbol;Acc:15516]                                                   |   |
| <b>YARS</b>            | Tyrosyl-trna synthetase [Source:HGNC Symbol;Acc:12840]                                                |   |
| <b>YBEY</b>            | Ybey metallopeptidase (putative) [Source:HGNC Symbol;Acc:1299]                                        |   |
| <b>YEATS2</b>          | YEATS domain containing 2 [Source:HGNC Symbol;Acc:25489]                                              |   |
| <b>YEATS4</b>          | YEATS domain containing 4 [Source:HGNC Symbol;Acc:24859]                                              |   |
| <b>YIPF6</b>           | Yip1 domain family, member 6 [Source:HGNC Symbol;Acc:28304]                                           |   |

|               |                                                                                                                          |  |
|---------------|--------------------------------------------------------------------------------------------------------------------------|--|
| <b>YKT6</b>   | YKT6 v-SNARE homolog ( <i>S. Cerevisiae</i> ) [Source:HGNC Symbol;Acc:16959]                                             |  |
| <b>YOD1</b>   | YOD1 OTU deubiquinating enzyme 1 homolog ( <i>S. Cerevisiae</i> ) [Source:HGNC Symbol;Acc:25035]                         |  |
| <b>YPEL2</b>  | Yippee-like 2 ( <i>Drosophila</i> ) [Source:HGNC Symbol;Acc:18326]                                                       |  |
| <b>YTHDC2</b> | YTH domain containing 2 [Source:HGNC Symbol;Acc:24721]                                                                   |  |
| <b>YWHAG</b>  | Tyrosine 3-monooxygenase/tryptophan 5-monooxygenase activation protein, gamma polypeptide [Source:HGNC Symbol;Acc:12852] |  |
| <b>YWHAH</b>  | Tyrosine 3-monooxygenase/tryptophan 5-monooxygenase activation protein, eta polypeptide [Source:HGNC Symbol;Acc:12853]   |  |
| <b>YWHAZ</b>  | Tyrosine 3-monooxygenase/tryptophan 5-monooxygenase activation protein, zeta polypeptide [Source:HGNC Symbol;Acc:12855]  |  |
| <b>YY2</b>    | YY2 transcription factor [Source:HGNC Symbol;Acc:31684]                                                                  |  |
| <b>ZACN</b>   | Zinc activated ligand-gated ion channel [Source:HGNC Symbol;Acc:29504]                                                   |  |
| <b>ZADH2</b>  | Zinc binding alcohol dehydrogenase domain containing 2 [Source:HGNC Symbol;Acc:28697]                                    |  |
| <b>ZAN</b>    | Zonadhesin [Source:HGNC Symbol;Acc:12857]                                                                                |  |
| <b>ZBBX</b>   | Zinc finger, B-box domain containing [Source:HGNC Symbol;Acc:26245]                                                      |  |
| <b>ZBED1</b>  | Zinc finger, BED-type containing 1 [Source:HGNC Symbol;Acc:447]                                                          |  |
| <b>ZBED5</b>  | Zinc finger, BED-type containing 5 [Source:HGNC Symbol;Acc:30803]                                                        |  |
| <b>ZBP1</b>   | Z-DNA binding protein 1 [Source:HGNC Symbol;Acc:16176]                                                                   |  |
| <b>ZBTB1</b>  | Zinc finger and BTB domain containing 1 [Source:HGNC Symbol;Acc:20259]                                                   |  |
| <b>ZBTB10</b> | Zinc finger and BTB domain containing 10 [Source:HGNC Symbol;Acc:30953]                                                  |  |
| <b>ZBTB11</b> | Zinc finger and BTB domain containing 11 [Source:HGNC Symbol;Acc:16740]                                                  |  |
| <b>ZBTB17</b> | Zinc finger and BTB domain containing 17 [Source:HGNC Symbol;Acc:12936]                                                  |  |
| <b>ZBTB24</b> | Zinc finger and BTB domain containing 24 [Source:HGNC Symbol;Acc:21143]                                                  |  |
| <b>ZBTB26</b> | Zinc finger and BTB domain containing 26 [Source:HGNC Symbol;Acc:23383]                                                  |  |

|                |                                                                         |  |
|----------------|-------------------------------------------------------------------------|--|
| <b>ZBTB33</b>  | Zinc finger and BTB domain containing 33 [Source:HGNC Symbol;Acc:16682] |  |
| <b>ZBTB34</b>  | Zinc finger and BTB domain containing 34 [Source:HGNC Symbol;Acc:31446] |  |
| <b>ZBTB38</b>  | Zinc finger and BTB domain containing 38 [Source:HGNC Symbol;Acc:26636] |  |
| <b>ZBTB4</b>   | Zinc finger and BTB domain containing 4 [Source:HGNC Symbol;Acc:23847]  |  |
| <b>ZBTB40</b>  | Zinc finger and BTB domain containing 40 [Source:HGNC Symbol;Acc:29045] |  |
| <b>ZBTB41</b>  | Zinc finger and BTB domain containing 41 [Source:HGNC Symbol;Acc:24819] |  |
| <b>ZBTB42</b>  | Zinc finger and BTB domain containing 42 [Source:HGNC Symbol;Acc:32550] |  |
| <b>ZBTB45</b>  | Zinc finger and BTB domain containing 45 [Source:HGNC Symbol;Acc:23715] |  |
| <b>ZBTB46</b>  | Zinc finger and BTB domain containing 46 [Source:HGNC Symbol;Acc:16094] |  |
| <b>ZBTB48</b>  | Zinc finger and BTB domain containing 48 [Source:HGNC Symbol;Acc:4930]  |  |
| <b>ZBTB49</b>  | Zinc finger and BTB domain containing 49 [Source:HGNC Symbol;Acc:19883] |  |
| <b>ZBTB7A</b>  | Zinc finger and BTB domain containing 7A [Source:HGNC Symbol;Acc:18078] |  |
| <b>ZBTB7B</b>  | Zinc finger and BTB domain containing 7B [Source:HGNC Symbol;Acc:18668] |  |
| <b>ZBTB8B</b>  | Zinc finger and BTB domain containing 8B [Source:HGNC Symbol;Acc:37057] |  |
| <b>ZBTB9</b>   | Zinc finger and BTB domain containing 9 [Source:HGNC Symbol;Acc:28323]  |  |
| <b>ZC3H11A</b> | Zinc finger CCCH-type containing 11A [Source:HGNC Symbol;Acc:29093]     |  |
| <b>ZC3H12A</b> | Zinc finger CCCH-type containing 12A [Source:HGNC Symbol;Acc:26259]     |  |
| <b>ZC3H12B</b> | Zinc finger CCCH-type containing 12B [Source:HGNC Symbol;Acc:17407]     |  |

|                |                                                                       |  |
|----------------|-----------------------------------------------------------------------|--|
| <b>ZC3H18</b>  | Zinc finger CCCH-type containing 18 [Source:HGNC Symbol;Acc:25091]    |  |
| <b>ZC3H3</b>   | Zinc finger CCCH-type containing 3 [Source:HGNC Symbol;Acc:28972]     |  |
| <b>ZC3H4</b>   | Zinc finger CCCH-type containing 4 [Source:HGNC Symbol;Acc:17808]     |  |
| <b>ZC3H6</b>   | Zinc finger CCCH-type containing 6 [Source:HGNC Symbol;Acc:24762]     |  |
| <b>ZCCHC11</b> | Zinc finger, CCHC domain containing 11 [Source:HGNC Symbol;Acc:28981] |  |
| <b>ZCCHC13</b> | Zinc finger, CCHC domain containing 13 [Source:HGNC Symbol;Acc:31749] |  |
| <b>ZCCHC14</b> | Zinc finger, CCHC domain containing 14 [Source:HGNC Symbol;Acc:24134] |  |
| <b>ZCCHC17</b> | Zinc finger, CCHC domain containing 17 [Source:HGNC Symbol;Acc:30246] |  |
| <b>ZCCHC2</b>  | Zinc finger, CCHC domain containing 2 [Source:HGNC Symbol;Acc:22916]  |  |
| <b>ZCCHC24</b> | Zinc finger, CCHC domain containing 24 [Source:HGNC Symbol;Acc:26911] |  |
| <b>ZCCHC4</b>  | Zinc finger, CCHC domain containing 4 [Source:HGNC Symbol;Acc:22917]  |  |
| <b>ZCCHC6</b>  | Zinc finger, CCHC domain containing 6 [Source:HGNC Symbol;Acc:25817]  |  |
| <b>ZCCHC7</b>  | Zinc finger, CCHC domain containing 7 [Source:HGNC Symbol;Acc:26209]  |  |
| <b>ZDBF2</b>   | Zinc finger, DBF-type containing 2 [Source:HGNC Symbol;Acc:29313]     |  |
| <b>ZDHHC1</b>  | Zinc finger, DHHC-type containing 1 [Source:HGNC Symbol;Acc:17916]    |  |
| <b>ZDHHC11</b> | Zinc finger, DHHC-type containing 11 [Source:HGNC Symbol;Acc:19158]   |  |
| <b>ZDHHC14</b> | Zinc finger, DHHC-type containing 14 [Source:HGNC Symbol;Acc:20341]   |  |
| <b>ZDHHC17</b> | Zinc finger, DHHC-type containing 17 [Source:HGNC Symbol;Acc:18412]   |  |
| <b>ZDHHC2</b>  | Zinc finger, DHHC-type containing 2 [Source:HGNC Symbol;Acc:18469]    |  |
| <b>ZDHHC22</b> | Zinc finger, DHHC-type containing 22 [Source:HGNC Symbol;Acc:20106]   |  |
| <b>ZDHHC6</b>  | Zinc finger, DHHC-type containing 6 [Source:HGNC Symbol;Acc:19160]    |  |
| <b>ZDHHC7</b>  | Zinc finger, DHHC-type containing 7 [Source:HGNC Symbol;Acc:18459]    |  |
| <b>ZDHHC8</b>  | Zinc finger, DHHC-type containing 8 [Source:HGNC Symbol;Acc:18474]    |  |
| <b>ZDHHC9</b>  | Zinc finger, DHHC-type containing 9 [Source:HGNC Symbol;Acc:18475]    |  |
| <b>ZER1</b>    | Zer-1 homolog (C. Elegans) [Source:HGNC Symbol;Acc:30960]             |  |
| <b>ZFAND3</b>  | Zinc finger, AN1-type domain 3 [Source:HGNC Symbol;Acc:18019]         |  |
| <b>ZFAT</b>    | Zinc finger and AT hook domain containing                             |  |
| <b>ZFHX2</b>   | Zinc finger homeobox 2                                                |  |

|                |                                                                  |  |
|----------------|------------------------------------------------------------------|--|
| <b>ZFHX3</b>   | Zinc finger homeobox 3                                           |  |
| <b>ZFHX4</b>   | Zinc finger homeobox 4                                           |  |
| <b>ZFP106</b>  | Zinc finger protein 106 homolog (mouse)                          |  |
| <b>ZFP2</b>    | Zinc finger protein 2 homolog (mouse)                            |  |
| <b>ZFP28</b>   | Zinc finger protein 28 homolog (mouse)                           |  |
| <b>ZFP3</b>    | Zinc finger protein 3 homolog (mouse)                            |  |
| <b>ZFP30</b>   | Zinc finger protein 30 homolog (mouse)                           |  |
| <b>ZFP36L2</b> | Zinc finger protein 36, C3H type-like 2                          |  |
| <b>ZFP37</b>   | Zinc finger protein 37 homolog (mouse)                           |  |
| <b>ZFP41</b>   | Zinc finger protein 41 homolog (mouse)                           |  |
| <b>ZFP42</b>   | Zinc finger protein 42 homolog (mouse)                           |  |
| <b>ZFP57</b>   | Zinc finger protein 57 homolog (mouse)                           |  |
| <b>ZFP62</b>   | Zinc finger protein 62 homolog (mouse)                           |  |
| <b>ZFP64</b>   | Zinc finger protein 64 homolog (mouse)                           |  |
| <b>ZFPM2</b>   | Zinc finger protein, multitype 2                                 |  |
| <b>ZFX</b>     | Zinc finger protein, X-linked                                    |  |
| <b>ZFY</b>     | Zinc finger protein, Y-linked                                    |  |
| <b>ZFYVE1</b>  | Zinc finger, FYVE domain containing 1                            |  |
| <b>ZFYVE20</b> | Zinc finger, FYVE domain containing 20                           |  |
| <b>ZFYVE26</b> | Zinc finger, FYVE domain containing 26                           |  |
| <b>ZFYVE28</b> | Zinc finger, FYVE domain containing 28                           |  |
| <b>ZG16</b>    | Zymogen granule protein 16 homolog (rat)                         |  |
| <b>ZHX3</b>    | Zinc fingers and homeoboxes 3                                    |  |
| <b>ZIC1</b>    | Zic family member 1 (odd-paired homolog, Drosophila)             |  |
| <b>ZIC2</b>    | Zic family member 2 (odd-paired homolog, Drosophila)             |  |
| <b>ZIK1</b>    | Zinc finger protein interacting with K protein 1 homolog (mouse) |  |
| <b>ZIM3</b>    | Zinc finger, imprinted 3                                         |  |
| <b>ZKSCAN1</b> | Zinc finger with KRAB and SCAN domains 1                         |  |
| <b>ZKSCAN5</b> | Zinc finger with KRAB and SCAN domains 5                         |  |
| <b>ZMAT5</b>   | Zinc finger, matrin-type 5                                       |  |
| <b>ZMYM1</b>   | Zinc finger, MYM-type 1                                          |  |
| <b>ZMYM3</b>   | Zinc finger, MYM-type 3                                          |  |
| <b>ZMYM4</b>   | Zinc finger, MYM-type 4                                          |  |

|                |                                      |  |
|----------------|--------------------------------------|--|
| <b>ZMYM5</b>   | Zinc finger, MYM-type 5              |  |
| <b>ZMYND12</b> | Zinc finger, MYND-type containing 12 |  |
| <b>ZNF10</b>   | Zinc finger protein 10               |  |
| <b>ZNF107</b>  | Zinc finger protein 107              |  |
| <b>ZNF133</b>  | Zinc finger protein 133              |  |
| <b>ZNF134</b>  | Zinc finger protein 134              |  |
| <b>ZNF135</b>  | Zinc finger protein 135              |  |
| <b>ZNF138</b>  | Zinc finger protein 138              |  |
| <b>ZNF142</b>  | Zinc finger protein 142              |  |
| <b>ZNF148</b>  | Zinc finger protein 148              |  |
| <b>ZNF154</b>  | Zinc finger protein 154              |  |
| <b>ZNF157</b>  | Zinc finger protein 157              |  |
| <b>ZNF16</b>   | Zinc finger protein 16               |  |
| <b>ZNF160</b>  | Zinc finger protein 160              |  |
| <b>ZNF165</b>  | Zinc finger protein 165              |  |
| <b>ZNF167</b>  | Zinc finger protein 167              |  |
| <b>ZNF18</b>   | Zinc finger protein 18               |  |
| <b>ZNF184</b>  | Zinc finger protein 184              |  |
| <b>ZNF185</b>  | Zinc finger protein 185 (LIM domain) |  |
| <b>ZNF19</b>   | Zinc finger protein 19               |  |
| <b>ZNF193</b>  | Zinc finger protein 193              |  |
| <b>ZNF197</b>  | Zinc finger protein 197              |  |
| <b>ZNF20</b>   | Zinc finger protein 20               |  |
| <b>ZNF200</b>  | Zinc finger protein 200              |  |
| <b>ZNF207</b>  | Zinc finger protein 207              |  |
| <b>ZNF208</b>  | Zinc finger protein 208              |  |
| <b>ZNF212</b>  | Zinc finger protein 212              |  |
| <b>ZNF22</b>   | Zinc finger protein 22 (KOX 15)      |  |
| <b>ZNF221</b>  | Zinc finger protein 221              |  |
| <b>ZNF222</b>  | Zinc finger protein 222              |  |
| <b>ZNF224</b>  | Zinc finger protein 224              |  |
| <b>ZNF225</b>  | Zinc finger protein 225              |  |
| <b>ZNF226</b>  | Zinc finger protein 226              |  |



|                |                                 |  |
|----------------|---------------------------------|--|
| <b>ZNF229</b>  | Zinc finger protein 229         |  |
| <b>ZNF23</b>   | Zinc finger protein 23 (KOX 16) |  |
| <b>ZNF239</b>  | Zinc finger protein 239         |  |
| <b>ZNF24</b>   | Zinc finger protein 24          |  |
| <b>ZNF248</b>  | Zinc finger protein 248         |  |
| <b>ZNF250</b>  | Zinc finger protein 250         |  |
| <b>ZNF251</b>  | Zinc finger protein 251         |  |
| <b>ZNF253</b>  | Zinc finger protein 253         |  |
| <b>ZNF256</b>  | Zinc finger protein 256         |  |
| <b>ZNF257</b>  | Zinc finger protein 257         |  |
| <b>ZNF26</b>   | Zinc finger protein 26          |  |
| <b>ZNF260</b>  | Zinc finger protein 260         |  |
| <b>ZNF263</b>  | Zinc finger protein 263         |  |
| <b>ZNF264</b>  | Zinc finger protein 264         |  |
| <b>ZNF266</b>  | Zinc finger protein 266         |  |
| <b>ZNF273</b>  | Zinc finger protein 273         |  |
| <b>ZNF274</b>  | Zinc finger protein 274         |  |
| <b>ZNF275</b>  | Zinc finger protein 275         |  |
| <b>ZNF28</b>   | Zinc finger protein 28          |  |
| <b>ZNF280C</b> | Zinc finger protein 280C        |  |
| <b>ZNF280D</b> | Zinc finger protein 280D        |  |
| <b>ZNF281</b>  | Zinc finger protein 281         |  |
| <b>ZNF285</b>  | Zinc finger protein 285         |  |
| <b>ZNF287</b>  | Zinc finger protein 287         |  |
| <b>ZNF292</b>  | Zinc finger protein 292         |  |
| <b>ZNF295</b>  | Zinc finger protein 295         |  |
| <b>ZNF30</b>   | Zinc finger protein 30          |  |
| <b>ZNF302</b>  | Zinc finger protein 302         |  |
| <b>ZNF304</b>  | Zinc finger protein 304         |  |
| <b>ZNF311</b>  | Zinc finger protein 311         |  |
| <b>ZNF318</b>  | Zinc finger protein 318         |  |
| <b>ZNF322A</b> | Zinc finger protein 322A        |  |
| <b>ZNF323</b>  | Zinc finger protein 323         |  |

|         |                          |   |
|---------|--------------------------|---|
| ZNF326  | Zinc finger protein 326  |   |
| ZNF329  | Zinc finger protein 329  |   |
| ZNF331  | Zinc finger protein 331  | √ |
| ZNF335  | Zinc finger protein 335  |   |
| ZNF33A  | Zinc finger protein 33A  |   |
| ZNF33B  | Zinc finger protein 33B  |   |
| ZNF341  | Zinc finger protein 341  |   |
| ZNF343  | Zinc finger protein 343  |   |
| ZNF345  | Zinc finger protein 345  |   |
| ZNF347  | Zinc finger protein 347  |   |
| ZNF354A | Zinc finger protein 354A |   |
| ZNF354C | Zinc finger protein 354C |   |
| ZNF365  | Zinc finger protein 365  |   |
| ZNF366  | Zinc finger protein 366  |   |
| ZNF37A  | Zinc finger protein 37A  |   |
| ZNF382  | Zinc finger protein 382  |   |
| ZNF384  | Zinc finger protein 384  | √ |
| ZNF385A | Zinc finger protein 385A |   |
| ZNF391  | Zinc finger protein 391  |   |
| ZNF394  | Zinc finger protein 394  |   |
| ZNF395  | Zinc finger protein 395  |   |
| ZNF397  | Zinc finger protein 397  |   |
| ZNF398  | Zinc finger protein 398  |   |
| ZNF407  | Zinc finger protein 407  |   |
| ZNF408  | Zinc finger protein 408  |   |
| ZNF410  | Zinc finger protein 410  |   |
| ZNF415  | Zinc finger protein 415  |   |
| ZNF416  | Zinc finger protein 416  |   |
| ZNF417  | Zinc finger protein 417  |   |
| ZNF418  | Zinc finger protein 418  |   |
| ZNF426  | Zinc finger protein 426  |   |
| ZNF430  | Zinc finger protein 430  |   |
| ZNF432  | Zinc finger protein 432  |   |

|                |                          |   |
|----------------|--------------------------|---|
| <b>ZNF434</b>  | Zinc finger protein 434  |   |
| <b>ZNF436</b>  | Zinc finger protein 436  |   |
| <b>ZNF440</b>  | Zinc finger protein 440  |   |
| <b>ZNF441</b>  | Zinc finger protein 441  |   |
| <b>ZNF445</b>  | Zinc finger protein 445  |   |
| <b>ZNF449</b>  | Zinc finger protein 449  |   |
| <b>ZNF451</b>  | Zinc finger protein 451  |   |
| <b>ZNF462</b>  | Zinc finger protein 462  |   |
| <b>ZNF468</b>  | Zinc finger protein 468  |   |
| <b>ZNF469</b>  | Zinc finger protein 469  |   |
| <b>ZNF470</b>  | Zinc finger protein 470  |   |
| <b>ZNF471</b>  | Zinc finger protein 471  |   |
| <b>ZNF473</b>  | Zinc finger protein 473  |   |
| <b>ZNF485</b>  | Zinc finger protein 485  |   |
| <b>ZNF488</b>  | Zinc finger protein 488  |   |
| <b>ZNF491</b>  | Zinc finger protein 491  |   |
| <b>ZNF493</b>  | Zinc finger protein 493  |   |
| <b>ZNF496</b>  | Zinc finger protein 496  |   |
| <b>ZNF497</b>  | Zinc finger protein 497  |   |
| <b>ZNF500</b>  | Zinc finger protein 500  |   |
| <b>ZNF501</b>  | Zinc finger protein 501  |   |
| <b>ZNF502</b>  | Zinc finger protein 502  |   |
| <b>ZNF503</b>  | Zinc finger protein 503  |   |
| <b>ZNF507</b>  | Zinc finger protein 507  |   |
| <b>ZNF510</b>  | Zinc finger protein 510  |   |
| <b>ZNF516</b>  | Zinc finger protein 516  |   |
| <b>ZNF517</b>  | Zinc finger protein 517  |   |
| <b>ZNF518B</b> | Zinc finger protein 518B |   |
| <b>ZNF519</b>  | Zinc finger protein 519  |   |
| <b>ZNF521</b>  | Zinc finger protein 521  | √ |
| <b>ZNF525</b>  | Zinc finger protein 525  |   |
| <b>ZNF526</b>  | Zinc finger protein 526  |   |
| <b>ZNF527</b>  | Zinc finger protein 527  |   |

|                |                          |  |
|----------------|--------------------------|--|
| <b>ZNF529</b>  | Zinc finger protein 529  |  |
| <b>ZNF530</b>  | Zinc finger protein 530  |  |
| <b>ZNF534</b>  | Zinc finger protein 534  |  |
| <b>ZNF541</b>  | Zinc finger protein 541  |  |
| <b>ZNF544</b>  | Zinc finger protein 544  |  |
| <b>ZNF546</b>  | Zinc finger protein 546  |  |
| <b>ZNF549</b>  | Zinc finger protein 549  |  |
| <b>ZNF552</b>  | Zinc finger protein 552  |  |
| <b>ZNF555</b>  | Zinc finger protein 555  |  |
| <b>ZNF558</b>  | Zinc finger protein 558  |  |
| <b>ZNF561</b>  | Zinc finger protein 561  |  |
| <b>ZNF562</b>  | Zinc finger protein 562  |  |
| <b>ZNF564</b>  | Zinc finger protein 564  |  |
| <b>ZNF566</b>  | Zinc finger protein 566  |  |
| <b>ZNF568</b>  | Zinc finger protein 568  |  |
| <b>ZNF571</b>  | Zinc finger protein 571  |  |
| <b>ZNF573</b>  | Zinc finger protein 573  |  |
| <b>ZNF577</b>  | Zinc finger protein 577  |  |
| <b>ZNF581</b>  | Zinc finger protein 581  |  |
| <b>ZNF582</b>  | Zinc finger protein 582  |  |
| <b>ZNF584</b>  | Zinc finger protein 584  |  |
| <b>ZNF585B</b> | Zinc finger protein 585B |  |
| <b>ZNF586</b>  | Zinc finger protein 586  |  |
| <b>ZNF587</b>  | Zinc finger protein 587  |  |
| <b>ZNF589</b>  | Zinc finger protein 589  |  |
| <b>ZNF592</b>  | Zinc finger protein 592  |  |
| <b>ZNF599</b>  | Zinc finger protein 599  |  |
| <b>ZNF600</b>  | Zinc finger protein 600  |  |
| <b>ZNF605</b>  | Zinc finger protein 605  |  |
| <b>ZNF608</b>  | Zinc finger protein 608  |  |
| <b>ZNF609</b>  | Zinc finger protein 609  |  |
| <b>ZNF610</b>  | Zinc finger protein 610  |  |
| <b>ZNF611</b>  | Zinc finger protein 611  |  |

|               |                         |  |
|---------------|-------------------------|--|
| <b>ZNF613</b> | Zinc finger protein 613 |  |
| <b>ZNF614</b> | Zinc finger protein 614 |  |
| <b>ZNF615</b> | Zinc finger protein 615 |  |
| <b>ZNF618</b> | Zinc finger protein 618 |  |
| <b>ZNF619</b> | Zinc finger protein 619 |  |
| <b>ZNF620</b> | Zinc finger protein 620 |  |
| <b>ZNF621</b> | Zinc finger protein 621 |  |
| <b>ZNF622</b> | Zinc finger protein 622 |  |
| <b>ZNF623</b> | Zinc finger protein 623 |  |
| <b>ZNF626</b> | Zinc finger protein 626 |  |
| <b>ZNF628</b> | Zinc finger protein 628 |  |
| <b>ZNF630</b> | Zinc finger protein 630 |  |
| <b>ZNF638</b> | Zinc finger protein 638 |  |
| <b>ZNF642</b> | Zinc finger protein 642 |  |
| <b>ZNF643</b> | Zinc finger protein 643 |  |
| <b>ZNF645</b> | Zinc finger protein 645 |  |
| <b>ZNF648</b> | Zinc finger protein 648 |  |
| <b>ZNF649</b> | Zinc finger protein 649 |  |
| <b>ZNF652</b> | Zinc finger protein 652 |  |
| <b>ZNF653</b> | Zinc finger protein 653 |  |
| <b>ZNF658</b> | Zinc finger protein 658 |  |
| <b>ZNF664</b> | Zinc finger protein 664 |  |
| <b>ZNF665</b> | Zinc finger protein 665 |  |
| <b>ZNF667</b> | Zinc finger protein 667 |  |
| <b>ZNF671</b> | Zinc finger protein 671 |  |
| <b>ZNF672</b> | Zinc finger protein 672 |  |
| <b>ZNF677</b> | Zinc finger protein 677 |  |
| <b>ZNF678</b> | Zinc finger protein 678 |  |
| <b>ZNF684</b> | Zinc finger protein 684 |  |
| <b>ZNF697</b> | Zinc finger protein 697 |  |
| <b>ZNF7</b>   | Zinc finger protein 7   |  |
| <b>ZNF701</b> | Zinc finger protein 701 |  |
| <b>ZNF701</b> | Zinc finger protein 701 |  |

|                |                               |  |
|----------------|-------------------------------|--|
| <b>ZNF704</b>  | Zinc finger protein 704       |  |
| <b>ZNF705B</b> | Zinc finger protein 705B      |  |
| <b>ZNF705D</b> | Zinc finger protein 705D      |  |
| <b>ZNF706</b>  | Zinc finger protein 706       |  |
| <b>ZNF71</b>   | Zinc finger protein 71        |  |
| <b>ZNF711</b>  | Zinc finger protein 711       |  |
| <b>ZNF713</b>  | Zinc finger protein 713       |  |
| <b>ZNF714</b>  | Zinc finger protein 714       |  |
| <b>ZNF717</b>  | Zinc finger protein 717       |  |
| <b>ZNF720</b>  | Zinc finger protein 720       |  |
| <b>ZNF730</b>  | Zinc finger protein 730       |  |
| <b>ZNF74</b>   | Zinc finger protein 74        |  |
| <b>ZNF746</b>  | Zinc finger protein 746       |  |
| <b>ZNF749</b>  | Zinc finger protein 749       |  |
| <b>ZNF750</b>  | Zinc finger protein 750       |  |
| <b>ZNF75D</b>  | Zinc finger protein 75D       |  |
| <b>ZNF765</b>  | Zinc finger protein 765       |  |
| <b>ZNF771</b>  | Zinc finger protein 771       |  |
| <b>ZNF772</b>  | Zinc finger protein 772       |  |
| <b>ZNF773</b>  | Zinc finger protein 773       |  |
| <b>ZNF776</b>  | Zinc finger protein 776       |  |
| <b>ZNF780A</b> | Zinc finger protein 780A      |  |
| <b>ZNF780B</b> | Zinc finger protein 780B      |  |
| <b>ZNF782</b>  | Zinc finger protein 782       |  |
| <b>ZNF783</b>  | Zinc finger family member 783 |  |
| <b>ZNF789</b>  | Zinc finger protein 789       |  |
| <b>ZNF792</b>  | Zinc finger protein 792       |  |
| <b>ZNF8</b>    | Zinc finger protein 8         |  |
| <b>ZNF804A</b> | Zinc finger protein 804A      |  |
| <b>ZNF805</b>  | Zinc finger protein 805       |  |
| <b>ZNF808</b>  | Zinc finger protein 808       |  |
| <b>ZNF81</b>   | Zinc finger protein 81        |  |
| <b>ZNF813</b>  | Zinc finger protein 813       |  |

|                |                                                 |  |
|----------------|-------------------------------------------------|--|
| <b>ZNF814</b>  | Zinc finger protein 814                         |  |
| <b>ZNF816</b>  | Zinc finger protein 816                         |  |
| <b>ZNF823</b>  | Zinc finger protein 823                         |  |
| <b>ZNF827</b>  | Zinc finger protein 827                         |  |
| <b>ZNF829</b>  | Zinc finger protein 829                         |  |
| <b>ZNF830</b>  | Zinc finger protein 830                         |  |
| <b>ZNF831</b>  | Zinc finger protein 831                         |  |
| <b>ZNF836</b>  | Zinc finger protein 836                         |  |
| <b>ZNF837</b>  | Zinc finger protein 837                         |  |
| <b>ZNF839</b>  | Zinc finger protein 839                         |  |
| <b>ZNF84</b>   | Zinc finger protein 84                          |  |
| <b>ZNF845</b>  | Zinc finger protein 845                         |  |
| <b>ZNF860</b>  | Zinc finger protein 860                         |  |
| <b>ZNF862</b>  | Zinc finger protein 862                         |  |
| <b>ZNF879</b>  | Zinc finger protein 879                         |  |
| <b>ZNF880</b>  | Zinc finger protein 880                         |  |
| <b>ZNF92</b>   | Zinc finger protein 92                          |  |
| <b>ZNFX1</b>   | Zinc finger, NFX1-type containing 1             |  |
| <b>ZNRF1</b>   | Zinc and ring finger 1                          |  |
| <b>ZP2</b>     | Zona pellucida glycoprotein 2 (sperm receptor)  |  |
| <b>ZPLD1</b>   | Zona pellucida-like domain containing 1         |  |
| <b>ZRANB3</b>  | Zinc finger, RAN-binding domain containing 3    |  |
| <b>ZSCAN1</b>  | Zinc finger and SCAN domain containing 1        |  |
| <b>ZSCAN12</b> | Zinc finger and SCAN domain containing 12       |  |
| <b>ZSCAN18</b> | Zinc finger and SCAN domain containing 18       |  |
| <b>ZSCAN23</b> | Zinc finger and SCAN domain containing 23       |  |
| <b>ZSCAN5A</b> | Zinc finger and SCAN domain containing 5A       |  |
| <b>ZSWIM1</b>  | Zinc finger, SWIM-type containing 1             |  |
| <b>ZSWIM2</b>  | Zinc finger, SWIM-type containing 2             |  |
| <b>ZSWIM5</b>  | Zinc finger, SWIM-type containing 5             |  |
| <b>ZSWIM7</b>  | Zinc finger, SWIM-type containing 7             |  |
| <b>ZUFSP</b>   | Zinc finger with UFM1-specific peptidase domain |  |
| <b>ZWINT</b>   | ZW10 interactor                                 |  |

|               |                                            |  |
|---------------|--------------------------------------------|--|
| <b>ZXDA</b>   | Zinc finger, X-linked, duplicated A        |  |
| <b>ZXDB</b>   | Zinc finger, X-linked, duplicated B        |  |
| <b>ZYG11B</b> | Zyg-11 homolog B (C. Elegans)              |  |
| <b>ZZEF1</b>  | Zinc finger, ZZ-type with EF-hand domain 1 |  |
| <b>ZZZ3</b>   | Zinc finger, ZZ-type containing 3          |  |



**Supplementary Table 7. Predicted targets of hsa-miR-181a-5p by RNA22 v2 that are cancer genes.**

| <b>Gene symbol</b> | <b>Gene name</b>                                                          |
|--------------------|---------------------------------------------------------------------------|
| <b>AKAP9</b>       | A kinase (PRKA) anchor protein (yotiao) 9                                 |
| <b>ARHGEF12</b>    | Rho guanine nucleotide exchange factor (GEF) 12                           |
| <b>ARID2</b>       | AT rich interactive domain 2 (ARID, RFX-like)                             |
| <b>ARNT</b>        | Aryl hydrocarbon receptor nuclear translocator                            |
| <b>ASXL1</b>       | Additional sex combs like 1 (Drosophila)                                  |
| <b>ATM</b>         | Ataxia telangiectasia mutated                                             |
| <b>ATP1A1</b>      | ATPase, Na <sup>+</sup> /K <sup>+</sup> transporting, alpha 1 polypeptide |
| <b>ATRX</b>        | $\alpha$ Thalassemia/mental retardation syndrome X-linked                 |
| <b>AXIN1</b>       | Axin 1                                                                    |
| <b>BAP1</b>        | BRCA1 associated protein-1 (ubiquitin carboxy-terminal hydrolase)         |
| <b>BCL11A</b>      | B-cell CLL/lymphoma 11A (zinc finger protein)                             |
| <b>BCL11B</b>      | B-cell CLL/lymphoma 11B (zinc finger protein)                             |
| <b>BCL3</b>        | B-cell CLL/lymphoma 3                                                     |
| <b>BCL6</b>        | B-cell CLL/lymphoma 6                                                     |
| <b>BCOR</b>        | BCL6 corepressor                                                          |
| <b>BCR</b>         | Breakpoint cluster region                                                 |
| <b>BLM</b>         | Bloom syndrome, recq helicase-like                                        |
| <b>BMPR1A</b>      | Bone morphogenetic protein receptor, type IA                              |
| <b>BRAF</b>        | V-raf murine sarcoma viral oncogene homolog B1                            |
| <b>BRCA1</b>       | Breast cancer 1, early onset                                              |
| <b>BRD4</b>        | Bromodomain containing 4                                                  |
| <b>BTG1</b>        | B-cell translocation gene 1, anti-proliferative                           |
| <b>BUB1B</b>       | Budding uninhibited by benzimidazoles 1 homolog $\beta$ (yeast)           |
| <b>C15orf55</b>    | Chromosome 15 open reading frame 55                                       |
| <b>C2orf44</b>     | Chromosome 2 open reading frame 44                                        |
| <b>CAMTA1</b>      | Calmodulin binding transcription activator 1                              |
| <b>CARD11</b>      | Caspase recruitment domain family, member 11                              |
| <b>CARS</b>        | Cysteinyl-trna synthetase                                                 |
| <b>CBLB</b>        | Cas-Br-M (murine) ecotropic retroviral transforming sequence b            |

|                |                                                                                                                |
|----------------|----------------------------------------------------------------------------------------------------------------|
| <b>CCND1</b>   | Cyclin D1                                                                                                      |
| <b>CD74</b>    | CD74 molecule, major histocompatibility complex, class II invariant chain                                      |
| <b>CDH1</b>    | Cadherin 1, type 1, E-cadherin (epithelial)                                                                    |
| <b>CDK4</b>    | Cyclin-dependent kinase 4                                                                                      |
| <b>CHCHD7</b>  | Coiled-coil-helix-coiled-coil-helix domain containing 7                                                        |
| <b>CHEK2</b>   | CHK2 checkpoint homolog ( <i>S. Pombe</i> )                                                                    |
| <b>CHN1</b>    | Chimerin (chimaerin) 1                                                                                         |
| <b>CIITA</b>   | Class II, major histocompatibility complex, transactivator                                                     |
| <b>CLTC</b>    | Clathrin, heavy chain (Hc)                                                                                     |
| <b>COL1A1</b>  | Collagen, type I, $\alpha$ 1                                                                                   |
| <b>CREB1</b>   | Camp responsive element binding protein 1                                                                      |
| <b>CREB3L2</b> | Camp responsive element binding protein 3-like 2                                                               |
| <b>CRTC3</b>   | CREB regulated transcription coactivator 3                                                                     |
| <b>CTNNB1</b>  | Catenin (cadherin-associated protein), $\beta$ 1, 88 kDa                                                       |
| <b>CYLD</b>    | Cylindromatosis (turban tumor syndrome)                                                                        |
| <b>DDX5</b>    | DEAD (Asp-Glu-Ala-Asp) box polypeptide 5                                                                       |
| <b>DICER1</b>  | Dicer 1, ribonuclease type III                                                                                 |
| <b>DNM2</b>    | Dynamamin 2                                                                                                    |
| <b>DNMT3A</b>  | DNA (cytosine-5-)-methyltransferase 3 $\alpha$                                                                 |
| <b>ECT2L</b>   | Epithelial cell transforming sequence 2 oncogene-like                                                          |
| <b>EGFR</b>    | Epidermal growth factor receptor                                                                               |
| <b>ELF4</b>    | E74-like factor 4 (ets domain transcription factor)                                                            |
| <b>ELL</b>     | Elongation factor RNA polymerase II                                                                            |
| <b>ERBB2</b>   | V-erb-b2 erythroblastic leukemia viral oncogene homolog 2, neuro/glioblastoma derived oncogene homolog (avian) |
| <b>ERCC2</b>   | Excision repair cross-complementing rodent repair deficiency, complementation group 2                          |
| <b>ETV5</b>    | Ets variant 5                                                                                                  |
| <b>EXT1</b>    | Exostosin 1                                                                                                    |
| <b>EZH2</b>    | Enhancer of zeste homolog 2 ( <i>Drosophila</i> )                                                              |
| <b>FANCA</b>   | Fanconi anemia, complementation group A                                                                        |
| <b>FANCD2</b>  | Fanconi anemia, complementation group D2                                                                       |
| <b>FBXO11</b>  | F-box protein 11                                                                                               |
| <b>FBXW7</b>   | F-box and WD repeat domain containing 7                                                                        |

|                 |                                                                                                |
|-----------------|------------------------------------------------------------------------------------------------|
| <b>FGFR1</b>    | Fibroblast growth factor receptor 1                                                            |
| <b>FGFR1OP</b>  | FGFR1 oncogene partner                                                                         |
| <b>FGFR2</b>    | Fibroblast growth factor receptor 2                                                            |
| <b>FHIT</b>     | Fragile histidine triad gene                                                                   |
| <b>FNBP1</b>    | Formin binding protein 1                                                                       |
| <b>FOXP1</b>    | Forkhead box P1                                                                                |
| <b>GAS7</b>     | Growth arrest-specific 7                                                                       |
| <b>GATA2</b>    | GATA binding protein 2                                                                         |
| <b>GATA3</b>    | GATA binding protein 3                                                                         |
| <b>GNAQ</b>     | Guanine nucleotide binding protein (G protein), q polypeptide                                  |
| <b>GNAS</b>     | GNAS complex locus                                                                             |
| <b>GOLGA5</b>   | Golgin A5                                                                                      |
| <b>GPHN</b>     | Gephyrin                                                                                       |
| <b>HERPUD1</b>  | Homocysteine-inducible, endoplasmic reticulum stress-inducible, ubiquitin-like domain member 1 |
| <b>HIP1</b>     | Huntingtin interacting protein 1                                                               |
| <b>HMGA1</b>    | High mobility group AT-hook 1                                                                  |
| <b>HMGA2</b>    | High mobility group AT-hook 2                                                                  |
| <b>HRAS</b>     | V-Ha-ras Harvey rat sarcoma viral oncogene homolog                                             |
| <b>IDH1</b>     | Isocitrate dehydrogenase 1 (NADP <sup>+</sup> ), soluble                                       |
| <b>IDH2</b>     | Isocitrate dehydrogenase 2 (NADP <sup>+</sup> ), mitochondrial                                 |
| <b>IL6ST</b>    | Interleukin 6 signal transducer (gp130, oncostatin M receptor)                                 |
| <b>IL7R</b>     | Interleukin 7 receptor                                                                         |
| <b>ITK</b>      | IL2-inducible T-cell kinase                                                                    |
| <b>JAK3</b>     | Janus kinase 3                                                                                 |
| <b>JAZF1</b>    | JAZF zinc finger 1                                                                             |
| <b>JUN</b>      | Jun proto-oncogene                                                                             |
| <b>KCNJ5</b>    | Potassium inwardly-rectifying channel, subfamily J, member 5                                   |
| <b>KDM5A</b>    | Lysine (K)-specific demethylase 5A                                                             |
| <b>KIAA1549</b> | KIAA1549                                                                                       |
| <b>KIT</b>      | V-kit Hardy-Zuckerman 4 feline sarcoma viral oncogene homolog                                  |
| <b>KRAS</b>     | V-Ki-ras2 Kirsten rat sarcoma viral oncogene homolog                                           |

|               |                                                                                                 |
|---------------|-------------------------------------------------------------------------------------------------|
| <b>LASP1</b>  | LIM and SH3 protein 1                                                                           |
| <b>LCP1</b>   | Lymphocyte cytosolic protein 1 (L-plastin)                                                      |
| <b>LIFR</b>   | Leukemia inhibitory factor receptor $\alpha$                                                    |
| <b>LPP</b>    | LIM domain containing preferred translocation partner in lipoma                                 |
| <b>MAF</b>    | V-maf musculoaponeurotic fibrosarcoma oncogene homolog (avian)                                  |
| <b>MALT1</b>  | Mucosa associated lymphoid tissue lymphoma translocation gene 1                                 |
| <b>MAML2</b>  | Mastermind-like 2 (Drosophila)                                                                  |
| <b>MAP2K1</b> | Mitogen-activated protein kinase kinase 1                                                       |
| <b>MAX</b>    | MYC associated factor X                                                                         |
| <b>MDM2</b>   | Mdm2 p53 binding protein homolog (mouse)                                                        |
| <b>MDM4</b>   | Mdm4 p53 binding protein homolog (mouse)                                                        |
| <b>MED12</b>  | Mediator complex subunit 12                                                                     |
| <b>MITF</b>   | Microphthalmia-associated transcription factor                                                  |
| <b>MKL1</b>   | Megakaryoblastic leukemia (translocation) 1                                                     |
| <b>MLF1</b>   | Myeloid leukemia factor 1                                                                       |
| <b>MLH1</b>   | Mutl homolog 1, colon cancer, nonpolyposis type 2 ( <i>E. Coli</i> )                            |
| <b>MLL</b>    | Myeloid/lymphoid or mixed-lineage leukemia (trithorax homolog, Drosophila)                      |
| <b>MLL3</b>   | Myeloid/lymphoid or mixed-lineage leukemia 3                                                    |
| <b>MLLT10</b> | Myeloid/lymphoid or mixed-lineage leukemia (trithorax homolog, Drosophila); translocated to, 10 |
| <b>MLLT3</b>  | Myeloid/lymphoid or mixed-lineage leukemia (trithorax homolog, Drosophila); translocated to, 3  |
| <b>MLLT4</b>  | Myeloid/lymphoid or mixed-lineage leukemia (trithorax homolog, Drosophila); translocated to, 4  |
| <b>MLLT6</b>  | Myeloid/lymphoid or mixed-lineage leukemia (trithorax homolog, Drosophila); translocated to, 6  |
| <b>MN1</b>    | Meningioma (disrupted in balanced translocation) 1                                              |
| <b>MSH6</b>   | Muts homolog 6 ( <i>E. Coli</i> )                                                               |
| <b>MSI2</b>   | Musashi homolog 2 (Drosophila)                                                                  |
| <b>MSN</b>    | Moesin                                                                                          |
| <b>MYD88</b>  | Myeloid differentiation primary response gene (88)                                              |
| <b>MYH11</b>  | Myosin, heavy chain 11, smooth muscle                                                           |
| <b>MYST4</b>  | MYST histone acetyltransferase (monocytic leukemia) 4                                           |

|                 |                                                                             |
|-----------------|-----------------------------------------------------------------------------|
| <b>NACA</b>     | Nascent polypeptide-associated complex $\alpha$ subunit                     |
| <b>NCOA1</b>    | Nuclear receptor coactivator 1                                              |
| <b>NDRG1</b>    | N-myc downstream regulated 1                                                |
| <b>NF1</b>      | Neurofibromin 1                                                             |
| <b>NF2</b>      | Neurofibromin 2 (merlin)                                                    |
| <b>NIN</b>      | Ninein (GSK3B interacting protein)                                          |
| <b>NONO</b>     | Non-POU domain containing, octamer-binding                                  |
| <b>NOTCH1</b>   | Notch 1                                                                     |
| <b>NOTCH2</b>   | Notch 2                                                                     |
| <b>NT5C2</b>    | 5'-nucleotidase, cytosolic II                                               |
| <b>NTRK3</b>    | Neurotrophic tyrosine kinase, receptor, type 3                              |
| <b>NUP214</b>   | Nucleoporin 214 kDa                                                         |
| <b>NUP98</b>    | Nucleoporin 98 kDa                                                          |
| <b>OLIG2</b>    | Oligodendrocyte lineage transcription factor 2                              |
| <b>P2RY8</b>    | Purinergic receptor P2Y, G-protein coupled, 8                               |
| <b>PAFAH1B2</b> | Platelet-activating factor acetylhydrolase 1b, catalytic subunit 2 (30 kDa) |
| <b>PALB2</b>    | Partner and localizer of BRCA2                                              |
| <b>PAX5</b>     | Paired box 5                                                                |
| <b>PAX7</b>     | Paired box 7                                                                |
| <b>PBRM1</b>    | Polybromo 1                                                                 |
| <b>PBX1</b>     | Pre-B-cell leukemia homeobox 1                                              |
| <b>PDE4DIP</b>  | Phosphodiesterase 4D interacting protein                                    |
| <b>PDGFRA</b>   | Platelet-derived growth factor receptor, $\alpha$ polypeptide               |
| <b>PDGFRB</b>   | Platelet-derived growth factor receptor, $\beta$ polypeptide                |
| <b>PER1</b>     | Period homolog 1 (Drosophila)                                               |
| <b>PHF6</b>     | PHD finger protein 6                                                        |
| <b>PHOX2B</b>   | Paired-like homeobox 2b                                                     |
| <b>PIK3CA</b>   | Phosphoinositide-3-kinase, catalytic, $\alpha$ polypeptide                  |
| <b>PIK3R1</b>   | Phosphoinositide-3-kinase, regulatory subunit 1 $\alpha$                    |
| <b>PLAG1</b>    | Pleiomorphic adenoma gene 1                                                 |
| <b>PML</b>      | Promyelocytic leukemia                                                      |
| <b>POU2AF1</b>  | POU class 2 associating factor 1                                            |
| <b>PPARG</b>    | Peroxisome proliferator-activated receptor $\gamma$                         |

|                |                                                                                   |
|----------------|-----------------------------------------------------------------------------------|
| <b>PRDM16</b>  | PR domain containing 16                                                           |
| <b>PTEN</b>    | Phosphatase and tensin homolog                                                    |
| <b>PTPN11</b>  | Protein tyrosine phosphatase, non-receptor type 11                                |
| <b>PTPRC</b>   | Protein tyrosine phosphatase, receptor type, C                                    |
| <b>RAD21</b>   | RAD21 homolog ( <i>S. Pombe</i> )                                                 |
| <b>RAF1</b>    | V-raf-1 murine leukemia viral oncogene homolog 1                                  |
| <b>RALGDS</b>  | Ral guanine nucleotide dissociation stimulator                                    |
| <b>RANBP17</b> | RAN binding protein 17                                                            |
| <b>RET</b>     | Ret proto-oncogene                                                                |
| <b>ROS1</b>    | C-ros oncogene 1 , receptor tyrosine kinase                                       |
| <b>RPN1</b>    | Ribophorin I                                                                      |
| <b>SBDS</b>    | Shwachman-Bodian-Diamond syndrome                                                 |
| <b>SDC4</b>    | Syndecan 4                                                                        |
| <b>SDHD</b>    | Succinate dehydrogenase complex, subunit D, integral membrane protein             |
| <b>SETBP1</b>  | SET binding protein 1                                                             |
| <b>SETD2</b>   | SET domain containing 2                                                           |
| <b>SFPQ</b>    | Splicing factor proline/glutamine-rich                                            |
| <b>SLC45A3</b> | Solute carrier family 45, member 3                                                |
| <b>SMO</b>     | Smoothed homolog ( <i>Drosophila</i> )                                            |
| <b>SOX2</b>    | SRY (sex determining region Y)-box 2                                              |
| <b>SRGAP3</b>  | SLIT-ROBO Rho gtpase activating protein 3                                         |
| <b>SS18</b>    | Synovial sarcoma translocation, chromosome 18                                     |
| <b>SS18L1</b>  | Synovial sarcoma translocation gene on chromosome 18-like 1                       |
| <b>SSX1</b>    | Synovial sarcoma, X breakpoint 1                                                  |
| <b>SSX2</b>    | Synovial sarcoma, X breakpoint 2                                                  |
| <b>SSX4</b>    | Synovial sarcoma, X breakpoint 4                                                  |
| <b>STAG2</b>   | Stromal antigen 2                                                                 |
| <b>STAT3</b>   | Signal transducer and activator of transcription 3 (acute-phase response factor)  |
| <b>SUZ12</b>   | Suppressor of zeste 12 homolog ( <i>Drosophila</i> )                              |
| <b>TAF15</b>   | TAF15 RNA polymerase II, TATA box binding protein (TBP)-associated factor, 68 kDa |
| <b>TAL1</b>    | T-cell acute lymphocytic leukemia 1                                               |
| <b>TBL1XR1</b> | Transducin $\beta$ -like 1 X-linked receptor 1                                    |

|                 |                                                                                    |
|-----------------|------------------------------------------------------------------------------------|
| <b>TCL1A</b>    | T-cell leukemia/lymphoma 1A                                                        |
| <b>TERT</b>     | Telomerase reverse transcriptase                                                   |
| <b>TET2</b>     | Tet oncogene family member 2                                                       |
| <b>TFRC</b>     | Transferrin receptor (p90, CD71)                                                   |
| <b>THRAP3</b>   | Thyroid hormone receptor associated protein 3                                      |
| <b>TMPRSS2</b>  | Transmembrane protease, serine 2                                                   |
| <b>TNFAIP3</b>  | Tumor necrosis factor, alpha-induced protein 3                                     |
| <b>TNFRSF14</b> | Tumor necrosis factor receptor superfamily, member 14 (herpesvirus entry mediator) |
| <b>TOP1</b>     | Topoisomerase (DNA) I                                                              |
| <b>TRAF7</b>    | TNF receptor-associated factor 7                                                   |
| <b>TRIM33</b>   | Tripartite motif containing 33                                                     |
| <b>TRIP11</b>   | Thyroid hormone receptor interactor 11                                             |
| <b>TRRAP</b>    | Transformation/transcription domain-associated protein                             |
| <b>TSC1</b>     | Tuberous sclerosis 1                                                               |
| <b>TSC2</b>     | Tuberous sclerosis 2                                                               |
| <b>TSHR</b>     | Thyroid stimulating hormone receptor                                               |
| <b>UBR5</b>     | Ubiquitin protein ligase E3 component n-recognin 5                                 |
| <b>VHL</b>      | Von Hippel-Lindau tumor suppressor                                                 |
| <b>WHSC1</b>    | Wolf-Hirschhorn syndrome candidate 1                                               |
| <b>WHSC1L1</b>  | Wolf-Hirschhorn syndrome candidate 1-like 1                                        |
| <b>WRN</b>      | Werner syndrome, recq helicase-like                                                |
| <b>WWTR1</b>    | WW domain containing transcription regulator 1                                     |
| <b>ZNF331</b>   | Zinc finger protein 331                                                            |
| <b>ZNF384</b>   | Zinc finger protein 384                                                            |
| <b>ZNF521</b>   | Zinc finger protein 521                                                            |

**Supplementary Table 8. Predicted targets of hsa-miR-181a-5p by TargetMiner**

| <b>Gene symbol</b> | <b>mRNA ID</b> | <b>Chromosomal location</b> | <b>Aliases</b>                 | <b>Gene name</b>                                                                     | <b>Cancer gene</b> |
|--------------------|----------------|-----------------------------|--------------------------------|--------------------------------------------------------------------------------------|--------------------|
| ACAP2              | NM_012287      | 3q29                        | CENTB2; CNT-B2                 | ArfGAP with coiled-coil, ankyrin repeat and PH domains 2                             |                    |
| ACVR1C             | NM_145259      | 2q24.1                      | ALK7; ACVRLK7                  | Activin A receptor, type IC                                                          |                    |
| ACVR2B             | NM_001106      | 3p22                        | HTX4; ACTRIIB; ActR-IIB        | Activin A receptor, type IIB                                                         |                    |
| ADCY1              | NM_021116      | 7p13-p12                    | AC1; DFNB44                    | Adenylate cyclase 1 (brain)                                                          |                    |
| AFF1               | NM_005935      | 4q21                        | AF4; PBM1; MLLT2               | AF4/FMR2 family, member 1                                                            |                    |
| AFF2               | NM_002025      | Xq28                        | FMR2; MRX2; OX19; FMR2P; FRAXE | AF4/FMR2 family, member 2                                                            |                    |
| AHCTF1             | NM_015446      | 1q44                        | ELYS; MST108; TMBS62; MSTP108  | AT hook containing transcription factor 1                                            |                    |
| AP1G1              | NM_001030007   | 16q23                       | ADTG; CLAPG1                   | Adaptor-related protein complex 1, g1 subunit                                        |                    |
| ARFGEF2            | NM_006420      | 20q13.13                    | BIG2; PVNH2; dJ1164I10.1       | ADP-ribosylation factor guanine nucleotide-exchange factor 2 (brefeldin A-inhibited) |                    |
| ARHGAP26           | NM_015071      | 5q31                        | GRAF; GRAF1; OPHN1L; OPHN1L1   | Rho GTPase activating protein 26                                                     |                    |
| ARHGAP29           | NM_004815      | 1p22.1                      | PARG1                          | Rho GTPase activating protein 29                                                     |                    |
| C2orf69            | NM_153689      | 2q33.1                      |                                | Chromosome 2 open reading frame 69                                                   |                    |
| C6orf89            | NM_152734      | 6p21.2                      | BRAP                           | Chromosome 6 open reading frame 89                                                   |                    |
| CALCR              | NM_001742      | 7q21.3                      | CRT; CTR; CT-R; CTR1           | Calcitonin receptor                                                                  |                    |
| CHIC1              | NM_001039840   | Xq13.2                      | BRX                            | Cysteine-rich hydrophobic domain 1                                                   |                    |
| CREB5              | NM_001011666   | 7p15.1                      | CRE-BPA                        | cAMP responsive element binding protein 5                                            |                    |
| CREBRF             | NM_153607      | 5q35.1                      | LRF; C5orf41                   | CREB3 regulatory factor                                                              |                    |
| CREBZF             | NM_001039618   | 11q14                       | ZF; SMILE                      | CREB/ATF bZIP transcription factor                                                   |                    |



|        |              |               |                                                                 |                                                              |   |
|--------|--------------|---------------|-----------------------------------------------------------------|--------------------------------------------------------------|---|
| CYLD   | NM_001042355 | 16q12.1       | EAC; MFT; SBS; TEM;<br>BRSS; CDMT; MFT1;<br>CYLD1; CYLDI; USPL2 | Cylindromatosis (turban tumour syndrome)                     | √ |
| DCLK1  | NM_004734    | 13q13         | CL1; DCLK; CLICK1;<br>DCDC3A; DCAMKL1                           | Doublecortin-like kinase 1                                   |   |
| DCP2   | NM_152624    | 5q22.2        | NUDT20                                                          | Decapping mRNA 2                                             |   |
| DIO2   | NM_000793    | 14q24.2-q24.3 | D2; 5DII; SelY; DIOII; TXDI2                                    | Deiodinase, iodothyronine, type II                           |   |
| DLGAP2 | NM_004745    | 8p23.3        | DAP2; SAPAP2                                                    | Discs, large (Drosophila) homolog-associated protein 2       |   |
| DNAJC6 | NM_014787    | 1p31.3        | DJC6; PARK19                                                    | DnaJ (Hsp40) homolog, subfamily C, member 6                  |   |
| DNAL1  | NM_031427    | 14q24.3       | CILD16; C14orf168                                               | Dynein, axonemal, light chain 1                              |   |
| DSC3   | NM_024423    | 18q12.1       | DSC; DSC1; DSC2; DSC4;<br>CDHF3; HT-CP                          | Desmocollin 3                                                |   |
| EPT1   | NM_033505    | 2p23.3        | SELI; SEPI                                                      | Ethanolaminephosphotransferase 1 (CDP-ethanolamine-specific) |   |
| ETNK1  | NM_018638    | 12p12.1       | EKI; EKII; EK1 1; Nbla10396                                     | Ethanolamine kinase 1                                        |   |
| FNDC3A | NM_014923    | 13q14.2       | HUGO; FNDC3; bA203I16.1;<br>bA203I16.5                          | Fibronectin type III domain containing 3A                    |   |
| FOXK1  | NM_001037165 | 7p22.1        | FOXK1L                                                          | Forkhead box K1                                              |   |
| GABRA4 | NM_000809    | 4p12          | -                                                               | g-Aminobutyric acid (GABA) A receptor, a4                    |   |
| GK5    | NM_001039547 | 3q23          |                                                                 | Glycerol kinase 5 (putative)                                 |   |
| GPD1L  | NM_015141    | 3p22.3        | GPD1-L                                                          | Glycerol-3-phosphate dehydrogenase 1-like                    |   |
| GPD2   | NM_000408    | 2q24.1        | GDH2; GPDM; mGPDH                                               | Glycerol-3-phosphate dehydrogenase 2 (mitochondrial)         |   |
| IKZF2  | NM_016260    | 2q34          | ANF1A2; HELIOS; ZNF1A2;<br>ZNFN1A2                              | IKAROS family zinc finger 2 (Helios)                         |   |
| ITGA2  | NM_002203    | 5q11.2        | BR; GPIa; CD49B; HPA-5;<br>VLA-2; VLAA2                         | Integrin, a2 (CD49B, alpha 2 subunit of VLA-2 receptor)      |   |

|           |              |          |                                                                                         |                                                                                |   |
|-----------|--------------|----------|-----------------------------------------------------------------------------------------|--------------------------------------------------------------------------------|---|
| KCMF1     | NM_020122    | 2        | FIGC; PCMF; ZZZ1; DEBT91                                                                | Potassium channel modulatory factor 1                                          |   |
| KCNMA1    | NM_001014797 | 10q22.3  | SLO; BKTM; SLO1; MaxiK; SAKCA; mSLO1; KCa1.1; SLO-ALPHA; bA205K10.1                     | Potassium large conductance calcium-activated channel, subfamily M, a member 1 |   |
| KDM5A     | NM_001042603 | 12p11    | RBP2; RBBP2; RBBP-2                                                                     | Lysine (K)-specific demethylase 5A                                             | √ |
| KIF3B     | NM_004798    | 20q11.21 | FLA8; HH0048; KLP-11                                                                    | Kinesin family member 3B                                                       |   |
| KITLG     | NM_000899    | 12q22    | SF; MGF; SCF; FPH2; KL-1; Kitl; SHEP7                                                   | KIT ligand                                                                     |   |
| KLF12     | NM_007249    | 13q22    | AP2REP; AP-2rep; HSPC122                                                                | Kruppel-like factor 12                                                         |   |
| KLHL28    | NM_017658    | 14q21.2  | BTBD5                                                                                   | Kelch-like family member 28                                                    |   |
| KPNA1     | NM_002264    | 3q21     | RCH2; SRP1; IPOA5; NPI-1                                                                | Karyopherin alpha 1 (importin alpha 5)                                         |   |
| KRAS      | NM_033360    | 12p12.1  | NS; NS3; CFC2; KRAS1; KRAS2; RASK2; KI-RAS; C-K-RAS; K-RAS2A; K-RAS2B; K-RAS4A; K-RAS4B | Kirsten rat sarcoma viral oncogene homolog                                     | √ |
| KRBOX4    | NM_017776    | Xp11.3   | ZNF673                                                                                  | KRAB box domain containing 4                                                   |   |
| LARP4     | NM_052879    | 12q13.12 | PP13296                                                                                 | La ribonucleoprotein domain family, member 4                                   |   |
| LDLRAD4   | NM_001003674 | 18p11.21 | C18orf1                                                                                 | Low density lipoprotein receptor class A domain containing 4                   |   |
| LIFR      | NM_002310    | 5p13-p12 | SWS; SJS2; STWS; CD118; LIF-R                                                           | Leukemia inhibitory factor receptor-a                                          | √ |
| MAL2      | NM_052886    | 8q23     |                                                                                         | Mal, T-cell differentiation protein 2 (gene/pseudogene)                        |   |
| MAPK1IP1L | NM_144578    | 14q22.3  | MISS; C14orf32; c14_5346                                                                | Mitogen-activated protein kinase 1 interacting protein 1-like                  |   |
| MARK1     | NM_018650    | 1        | MARK; Par1c; Par-1c                                                                     | MAP/microtubule affinity-regulating kinase 1                                   |   |
| MFAP3L    | NM_001009554 | 4q32.3   | NYD-sp9                                                                                 | Microfibrillar-associated protein 3-like                                       |   |

|         |              |           |                                                                   |                                                                      |
|---------|--------------|-----------|-------------------------------------------------------------------|----------------------------------------------------------------------|
| MICU3   | NM_181723    | 8p22      | EFHA2                                                             | Mitochondrial calcium uptake family, member 3                        |
| MKLN1   | NM_013255    | 7q32      | TWA2                                                              | Muskelin 1, intracellular mediator containing kelch motifs           |
| MTX3    | NM_001010891 | 5q14.1    |                                                                   | Metaxin 3                                                            |
| NCOA7   | NM_181782    | 6q22.32   | ESNA1; TLDC4; ERAP140; NCOA7-AS; Nbla00052; Nbla10993; dJ187J11.3 | Nuclear receptor coactivator 7                                       |
| NFYB    | NM_006166    | 12q22-q23 | HAP3; CBF-A; CBF-B; NF-YB                                         | Nuclear transcription factor Yb                                      |
| NUFIP2  | NM_020772    | 17q11.2   | PIG1; 82-FIP; FIP-82; 182-FIP                                     | Nuclear fragile X mental retardation protein interacting protein     |
| PAG1    | NM_018440    | 8q21.13   | CBP; PAG                                                          | Phosphoprotein membrane anchor with glycosphingolipid microdomains 1 |
| PALM2   | NM_053016    | 9q31.3    | AKAP2                                                             | paralemmin 2                                                         |
| PAPD5   | NM_001040284 | 16q12.1   | TRF4-2                                                            | PAP associated domain containing 5                                   |
| PDE5A   | NM_033430    | 4q27      | CN5A; PDE5; CGB-PDE                                               | Phosphodiesterase 5A, cGMP-specific                                  |
| PGAP1   | NM_024989    | 2q33.1    | Bst1; MRT42; SPG67; ISPD3024                                      | Post-GPI attachment to proteins 1                                    |
| PGR     | NM_000926    | 11q22-q23 | PR; NR3C3                                                         | Progesterone receptor                                                |
| PHACTR2 | NM_014721    | 6q24.2    | C6orf56                                                           | Phosphatase and actin regulator 2                                    |
| PHC3    | NM_024947    | 3q26.2    | EDR3; HPH3                                                        | Polyhomeotic homolog 3                                               |
| PHF20L1 | NM_016018    | 8q24.22   | CGI-72; TDRD20B                                                   | PHD finger protein 20-like 1                                         |
| POLI    | NM_007195    | 18q21.1   | RAD30B; RAD30B                                                    | Polymerase (DNA directed) iota                                       |
| PPP1R3B | NM_024607    | 8p23.1    | GL; PTG; PPP1R4                                                   | Protein phosphatase 1, regulatory subunit 3B                         |
| PPP1R9A | NM_017650    | 7q21.3    | NRB1; NRBI; Neurabin-I                                            | Protein phosphatase 1, regulatory subunit 9A                         |
| PRKAA2  | NM_006252    | 1p31      | AMPK; AMPK2; PRKAA; AMPKa2                                        | Protein kinase, AMP-activated, a2 catalytic subunit                  |
| PTBP3   | NM_005156    | 9q32      | ROD1                                                              | Polypyrimidine tract binding protein 3                               |
| PTPRT   | NM_007050    | 20q12-q13 | RPTPrho                                                           | Protein tyrosine phosphatase, receptor type, T                       |
| PURB    | NM_033224    | 7p13      | PURBETA                                                           | Purine-rich element binding protein B                                |
| QKI     | NM_206853    | 6q26      | QK; Hqk; QK1; QK3; hqk1                                           | QKI, KH domain containing, RNA binding                               |

|         |              |               |                                                                                |                                                                                                                                             |   |
|---------|--------------|---------------|--------------------------------------------------------------------------------|---------------------------------------------------------------------------------------------------------------------------------------------|---|
| RAB3IP  | NM_001024647 | 12q15         | RABIN3                                                                         | RAB3A interacting protein                                                                                                                   |   |
| RAB3IP  | NM_175624    | 12q15         | RABIN3                                                                         | RAB3A interacting protein                                                                                                                   |   |
| RIMKLA  | NM_173642    | 1p34.2        | NAAGS; FAM80A; NAAGS-II                                                        | Ribosomal modification protein rimK-like family member A                                                                                    |   |
| RNF8    | NM_003958    | 6p21.3        | hRNF8                                                                          | Ring finger protein 8, E3 ubiquitin protein ligase                                                                                          |   |
| RPS6KA3 | NM_004586    | Xp22.2-p22.1  | CLS; RSK; HU-3; RSK2; MRX19; ISPK-1; p90-RSK2; pp90RSK2; MAPKAPK1B; S6K-alpha3 | Ribosomal protein S6 kinase, 90 kDa, polypeptide 3                                                                                          |   |
| SCD     | NM_005063    | 10q24.31      | SCD1; FADS5; SCDO5; MSTP008                                                    | Stearoyl-CoA desaturase (d-9-desaturase)                                                                                                    |   |
| SEMA5A  | NM_003966    | 5p15.2        | semF; SEMAF                                                                    | Sema domain, seven thrombospondin repeats (type 1 and type 1-like), transmembrane domain (TM) and short cytoplasmic domain, (semaphorin) 5A |   |
| SERTAD2 | NM_014755    | 2p14          | Sei-2; TRIP-Br2                                                                | SERTA domain containing 2                                                                                                                   |   |
| SLC1A2  | NM_004171    | 11p13-p12     | EAAT2; GLT-1                                                                   | Solute carrier family 1 (glial high affinity glutamate transporter), member 2                                                               |   |
| SMAD5   | NM_001001419 | 5q31          | DWFC; JV5-1; MADH5                                                             | SMAD family member 5                                                                                                                        |   |
| SMAD7   | NM_005904    | 18q21.1       | CRCS3; MADH7; MADH8                                                            | SMAD family member 7                                                                                                                        |   |
| SNX1    | NM_003099    | 15q22.31      | VPS5; HsT17379                                                                 | Sorting nexin 1                                                                                                                             |   |
| SSX2IP  | NM_014021    | 1p22.3        | ADIP                                                                           | Synovial sarcoma, X breakpoint 2 interacting protein                                                                                        |   |
| ST8SIA3 | NM_015879    | 18q21.31      | SIAT8C; ST8SiaIII                                                              | ST8 a-N-acetyl-neuraminide a-2,8-sialyltransferase 3                                                                                        |   |
| STK4    | NM_006282    | 20q11.2-q13.2 | KRS2; MST1; YSK3; TIIC                                                         | Serine/threonine kinase 4                                                                                                                   |   |
| TET2    | NM_017628    | 4q24          | MDS; KIAA1546                                                                  | Tet methylcytosine dioxygenase 2                                                                                                            | √ |

|         |           |          |                                                                               |                                                                  |  |
|---------|-----------|----------|-------------------------------------------------------------------------------|------------------------------------------------------------------|--|
| THRB    | NM_000461 | 3p24.2   | GRTH; PRTH; THR1;<br>ERBA2; NR1A2; THRB1;<br>THRB2; C-ERBA-2; C-ERBA-<br>BETA | Thyroid hormone receptor-b                                       |  |
| TMEM196 | NM_152774 | 7p21.1   |                                                                               | Transmembrane protein 196                                        |  |
| TMF1    | NM_007114 | 3p21-p12 | TMF; ARA160                                                                   | TATA element modulatory factor 1                                 |  |
| TNPO1   | NM_002270 | 5q13.2   | MIP; TRN; IPO2; MIP1;<br>KPNB2                                                | Transportin 1                                                    |  |
| TRIM2   | NM_015271 | 4q31.3   | CMT2R; RNF86                                                                  | Tripartite motif containing 2                                    |  |
| UBTF    | NM_014233 | 17q21.31 | UBF; UBF1; UBF2; UBF-1;<br>NOR-90                                             | Upstream binding transcription factor, RNA<br>polymerase         |  |
| USP31   | NM_020718 | 16p12.2  |                                                                               | Ubiquitin specific peptidase 31                                  |  |
| VPS36   | NM_016075 | 13q14.3  | EAP45; C13orf9; CGI-145                                                       | Vacuolar protein sorting 36 homolog ( <i>S.<br/>cerevisiae</i> ) |  |
| XK      | NM_021083 | Xp21.1   | KX; NA; NAC; X1k; XKR1;<br>MCLDS                                              | X-linked Kx blood group                                          |  |
| XPO4    | NM_022459 | 13q11    | exp4                                                                          | Exportin 4                                                       |  |
| XYLT1   | NM_022166 | 16p12.3  | XT1; XTI; XT-I; DBQD2;<br>XYLT1; PXYLT1                                       | Xylosyltransferase I                                             |  |
| ZFP14   | NM_020917 | 19q13.12 | ZNF531                                                                        | ZFP14 zinc finger protein                                        |  |
| ZFP62   | NM_152283 | 5q35.3   | ZET; ZNF755                                                                   | ZFP62 zinc finger protein                                        |  |
| ZNF117  | NM_015852 | 7q11.21  | HPF9; H-plk                                                                   | Zinc finger protein 117                                          |  |
| ZNF493  | NM_175910 | 19p12    |                                                                               | Zinc finger protein 493                                          |  |
| ZNF781  | NM_152605 | 19q13.12 |                                                                               | Zinc finger protein 781                                          |  |
