# Supplementary material
Source: publisher site journal article supplement (https://www.dovepress.com/article/73551)
Supplement: Supplementary file 2 [file get_supplementary_file.php]

**Supplementary Table 9. Predicted targets of hsa-miR-181a by TargetScan 6.2.**

| <b>Target</b>   | <b>Gene ID</b>      | <b>Gene name</b>                                            | <b>Total context+ score</b> | <b>Aggregate P<sub>CT</sub></b> | <b>Cancer gene</b> |
|-----------------|---------------------|-------------------------------------------------------------|-----------------------------|---------------------------------|--------------------|
| <b>ABL2</b>     | <u>NM_001136000</u> | V-abl Abelson murine leukemia viral oncogene homolog 2      | > -0.03                     | 0.31                            | √                  |
| <b>ACAN</b>     | <u>NM_001135</u>    | Aggrecan                                                    | -0.09                       | 0.12                            |                    |
| <b>ACCN2</b>    | <u>NM_001095</u>    | Amiloride-sensitive cation channel 2, neuronal              | > -0.01                     | 0.26                            |                    |
| <b>ACER3</b>    | <u>NM_018367</u>    | Alkaline ceramidase 3                                       | -0.04                       | <0.1                            |                    |
| <b>ACVR2A</b>   | <u>NM_001616</u>    | Activin A receptor, type IIA                                | -0.16                       | 0.64                            |                    |
| <b>ADAMTS1</b>  | <u>NM_006988</u>    | ADAM metalloproteinase with thrombospondin type 1 motif, 1  | > -0.02                     | 0.42                            |                    |
| <b>ADAMTS18</b> | <u>NM_199355</u>    | ADAM metalloproteinase with thrombospondin type 1 motif, 18 | -0.17                       | 0.64                            |                    |
| <b>ADAMTS5</b>  | <u>NM_007038</u>    | ADAM metalloproteinase with thrombospondin type 1 motif, 5  | -0.24                       | 0.59                            |                    |
| <b>ADAMTSL1</b> | <u>NM_001040272</u> | ADAMTS-like 1                                               | -0.26                       | 0.72                            |                    |
| <b>ADARB1</b>   | <u>NM_001112</u>    | Adenosine deaminase, RNA-specific, B1                       | -0.28                       | 0.62                            |                    |
| <b>AFAP1</b>    | <u>NM_001134647</u> | Actin filament associated protein 1                         | -0.09                       | 0.61                            |                    |
| <b>AFTPH</b>    | <u>NM_001002243</u> | Aftiphilin                                                  | -0.16                       | 0.49                            |                    |
| <b>AK3</b>      | <u>NM_001199852</u> | Adenylate kinase 3                                          | > -0.02                     | 0.6                             |                    |
| <b>AKAP7</b>    | <u>NM_004842</u>    | A kinase (PRKA) anchor protein 7                            | -0.16                       | 0.37                            |                    |
| <b>ANAPC16</b>  | <u>NM_001242546</u> | Anaphase promoting complex subunit 16                       | -0.1                        | 0.66                            |                    |
| <b>ANK1</b>     | <u>NM_000037</u>    | Ankyrin 1, erythrocytic                                     | > -0.03                     | 0.46                            |                    |
| <b>ANKRD12</b>  | <u>NM_001083625</u> | Ankyrin repeat domain 12                                    | > -0.03                     | 0.31                            |                    |

|                 |                              |                                                                   |         |      |   |
|-----------------|------------------------------|-------------------------------------------------------------------|---------|------|---|
| <b>ANKRD33B</b> | <a href="#">NM_001164440</a> | Ankyrin repeat domain 33B                                         | -0.17   | 0.35 |   |
| <b>ANKRD43</b>  | <a href="#">NM_175873</a>    | Ankyrin repeat domain 43                                          | -0.16   | 0.65 |   |
| <b>ANKRD44</b>  | <a href="#">NM_001195144</a> | Ankyrin repeat domain 44                                          | -0.17   | 0.49 |   |
| <b>ANKRD52</b>  | <a href="#">NM_173595</a>    | Ankyrin repeat domain 52                                          | > -0.05 | 0.7  |   |
| <b>AP1S3</b>    | <a href="#">NM_001039569</a> | Adaptor-related protein complex 1, sigma 3 subunit                | -0.26   | 0.76 |   |
| <b>APBA1</b>    | <a href="#">NM_001163</a>    | Amyloid beta (A4) precursor protein-binding, family A, member 1   | -0.13   | 0.81 |   |
| <b>APLP2</b>    | <a href="#">NM_001142276</a> | Amyloid beta (A4) precursor-like protein 2                        | -0.05   | 0.55 |   |
| <b>APOO</b>     | <a href="#">NM_024122</a>    | Apolipoprotein O                                                  | -0.32   | 0.41 |   |
| <b>ARID2</b>    | <a href="#">NM_152641</a>    | AT rich interactive domain 2 (ARID, RFX-like)                     | -0.07   | 0.55 | √ |
| <b>ARL3</b>     | <a href="#">NM_004311</a>    | ADP-ribosylation factor-like 3                                    | > -0.03 | 0.51 |   |
| <b>ARRDC3</b>   | <a href="#">NM_020801</a>    | Arrestin domain containing 3                                      | > -0.02 | 0.47 |   |
| <b>ATF7</b>     | <a href="#">NM_001130059</a> | Activating transcription factor 7                                 | > -0.01 | 0.26 |   |
| <b>ATG2B</b>    | <a href="#">NM_018036</a>    | ATG2 autophagy related 2 homolog B (S. Cerevisiae)                | > -0.02 | 0.61 |   |
| <b>ATG7</b>     | <a href="#">NM_001136031</a> | ATG7 autophagy related 7 homolog (S. Cerevisiae)                  | -0.03   | 0.61 |   |
| <b>ATP11A</b>   | <a href="#">NM_015205</a>    | ATPase, class VI, type 11A                                        | > -0.04 | 0.79 |   |
| <b>ATP2B3</b>   | <a href="#">NM_001001344</a> | ATPase, Ca <sup>++</sup> transporting, plasma membrane 3          | -0.11   | 0.25 | √ |
| <b>ATP8B2</b>   | <a href="#">NM_020452</a>    | ATPase, class I, type 8B, member 2                                | > -0.01 | 0.53 |   |
| <b>ATXN1</b>    | <a href="#">NM_000332</a>    | Ataxin 1                                                          | > -0.06 | 0.88 | √ |
| <b>ATXN7</b>    | <a href="#">NM_000333</a>    | Ataxin 7                                                          | -0.19   | 0.77 |   |
| <b>B4GALT1</b>  | <a href="#">NM_001497</a>    | UDP-Gal:betaglcnac beta 1,4- galactosyltransferase, polypeptide 1 | -0.12   | 0.69 |   |
| <b>BAG4</b>     | <a href="#">NM_001204878</a> | BCL2-associated athanogene 4                                      | -0.27   | 0.64 |   |
| <b>BAI3</b>     | <a href="#">NM_001704</a>    | Brain-specific angiogenesis inhibitor 3                           | -0.19   | 0.68 |   |
| <b>BCL2</b>     | <a href="#">NM_000633</a>    | B-cell CLL/lymphoma 2                                             | > -0.04 | 0.83 | √ |

|                  |                              |                                                                                     |         |      |   |
|------------------|------------------------------|-------------------------------------------------------------------------------------|---------|------|---|
| <b>BCL9</b>      | <a href="#">NM_004326</a>    | B-cell CLL/lymphoma 9                                                               | -0.03   | 0.32 | √ |
| <b>BCR</b>       | <a href="#">NM_004327</a>    | Breakpoint cluster region                                                           | > -0.01 | 0.34 |   |
| <b>BHLHE40</b>   | <a href="#">NM_003670</a>    | Basic helix-loop-helix family, member e40                                           | -0.3    | 0.77 |   |
| <b>BMF</b>       | <a href="#">NM_001003940</a> | Bcl2 modifying factor                                                               | -0.01   | 0.53 |   |
| <b>BNC2</b>      | <a href="#">NM_017637</a>    | Basonuclin 2                                                                        | > -0.03 | 0.39 |   |
| <b>BRD1</b>      | <a href="#">NM_014577</a>    | Bromodomain containing 1                                                            | -0.22   | 0.47 |   |
| <b>BRWD1</b>     | <a href="#">NM_033656</a>    | Bromodomain and WD repeat domain containing 1                                       | -0.32   | 0.9  |   |
| <b>BTBD3</b>     | <a href="#">NM_014962</a>    | BTB (POZ) domain containing 3                                                       | -0.39   | 0.95 |   |
| <b>C10orf46</b>  | <a href="#">NM_153810</a>    | Chromosome 10 open reading frame 46                                                 | N/A     | 0.73 |   |
| <b>C11orf30</b>  | <a href="#">NM_020193</a>    | Chromosome 11 open reading frame 30                                                 | -0.15   | 0.42 |   |
| <b>C11orf75</b>  | <a href="#">NM_020179</a>    | Chromosome 11 open reading frame 75                                                 | -0.04   | 0.61 |   |
| <b>C12orf68</b>  | <a href="#">NM_001013635</a> | Chromosome 12 open reading frame 68                                                 | > -0.02 | 0.36 |   |
| <b>C13orf23</b>  | <a href="#">NM_025138</a>    | Chromosome 13 open reading frame 23                                                 | -0.17   | 0.61 |   |
| <b>C13orf30</b>  | <a href="#">NM_182508</a>    | Chromosome 13 open reading frame 30                                                 | > -0.02 | 0.63 |   |
| <b>C14orf43</b>  | <a href="#">NM_001043318</a> | Chromosome 14 open reading frame 43                                                 | -0.23   | 0.76 |   |
| <b>C17orf63</b>  | <a href="#">NM_001077498</a> | Chromosome 17 open reading frame 63                                                 | > -0.03 | 0.65 |   |
| <b>C1GALT1</b>   | <a href="#">NM_020156</a>    | Core 1 synthase, glycoprotein-N-acetylgalactosamine 3-beta-galactosyltransferase, 1 | -0.12   | 0.76 |   |
| <b>C3orf43</b>   | <a href="#">NM_001077657</a> | Chromosome 3 open reading frame 43                                                  | -0.16   | 0.22 |   |
| <b>C3orf62</b>   | <a href="#">NM_198562</a>    | Chromosome 3 open reading frame 62                                                  | -0.18   | 0.38 |   |
| <b>C6orf192</b>  | <a href="#">NM_052831</a>    | Chromosome 6 open reading frame 192                                                 | -0.15   | 0.46 |   |
| <b>C6orf35</b>   | <a href="#">NM_018452</a>    | Chromosome 6 open reading frame 35                                                  | -0.3    | 0.8  |   |
| <b>CACNA2D2</b>  | <a href="#">NM_001005505</a> | Calcium channel, voltage-dependent, alpha 2/delta subunit 2                         | > -0.02 | 0.76 |   |
| <b>CALR</b>      | <a href="#">NM_004343</a>    | Calreticulin                                                                        | -0.07   | 0.34 | √ |
| <b>CAMSAP1L1</b> | <a href="#">NM_203459</a>    | Calmodulin regulated spectrin-associated protein 1-like 1                           | -0.18   | 0.34 |   |
| <b>CAMTA2</b>    | <a href="#">NM_001171166</a> | Calmodulin binding transcription activator 2                                        | -0.1    | 0.33 |   |

|                |                              |                                                                       |         |       |   |
|----------------|------------------------------|-----------------------------------------------------------------------|---------|-------|---|
| <b>CAPRN1</b>  | <a href="#">NM_203364</a>    | Cell cycle associated protein 1                                       | -0.3    | 0.63  |   |
| <b>CARM1</b>   | <a href="#">NM_199141</a>    | Coactivator-associated arginine methyltransferase 1                   | -0.12   | 0.67  |   |
| <b>CASP10</b>  | <a href="#">NM_001206524</a> | Caspase 10, apoptosis-related cysteine peptidase                      | > -0.03 | 0.25  |   |
| <b>CBFA2T3</b> | <a href="#">NM_005187</a>    | Core-binding factor, runt domain, alpha subunit 2; translocated to, 3 | -0.24   | 0.6   | √ |
| <b>CBLB</b>    | <a href="#">NM_170662</a>    | Cas-Br-M (murine) ecotropic retroviral transforming sequence b        | -0.24   | 0.33  | √ |
| <b>CBLL1</b>   | <a href="#">NM_024814</a>    | Cas-Br-M (murine) ecotropic retroviral transforming sequence-like 1   | -0.19   | 0.51  |   |
| <b>CBX4</b>    | <a href="#">NM_003655</a>    | Chromobox homolog 4                                                   | -0.29   | 0.69  |   |
| <b>CBX5</b>    | <a href="#">NM_001127321</a> | Chromobox homolog 5                                                   | > -0.03 | 0.7   |   |
| <b>CCDC117</b> | <a href="#">NM_173510</a>    | Coiled-coil domain containing 117                                     | > -0.03 | 0.56  |   |
| <b>CCDC141</b> | <a href="#">NM_173648</a>    | Coiled-coil domain containing 141                                     | > -0.02 | 0.48  |   |
| <b>CCDC17</b>  | <a href="#">NM_001114938</a> | Coiled-coil domain containing 17                                      | N/A     | 0.35  |   |
| <b>CCDC6</b>   | <a href="#">NM_005436</a>    | Coiled-coil domain containing 6                                       | > -0.03 | 0.62  | √ |
| <b>CCDC64</b>  | <a href="#">NM_207311</a>    | Coiled-coil domain containing 64                                      | > -0.01 | 0.58  |   |
| <b>CCDC90A</b> | <a href="#">NM_001031713</a> | Coiled-coil domain containing 90A                                     | > -0.03 | < 0.1 |   |
| <b>CCL8</b>    | <a href="#">NM_005623</a>    | Chemokine (C-C motif) ligand 8                                        | -0.23   | <0.1  |   |
| <b>CCNG1</b>   | <a href="#">NM_004060</a>    | Cyclin G1                                                             | -0.17   | <0.1  |   |
| <b>CCNJ</b>    | <a href="#">NM_001134375</a> | Cyclin J                                                              | -0.16   | 0.69  |   |
| <b>CCNK</b>    | <a href="#">NM_001099402</a> | Cyclin K                                                              | -0.23   | 0.72  |   |
| <b>CCNT2</b>   | <a href="#">NM_001241</a>    | Cyclin T2                                                             | -0.22   | 0.1   |   |
| <b>CD4</b>     | <a href="#">NM_000616</a>    | CD4 molecule                                                          | -0.17   | 0.55  |   |
| <b>CD69</b>    | <a href="#">NM_001781</a>    | CD69 molecule                                                         | -0.15   | 0.41  |   |
| <b>CDC27</b>   | <a href="#">NM_001114091</a> | Cell division cycle 27 homolog (S. Cerevisiae)                        | -0.04   | 0.34  |   |

|                |                     |                                                                                                    |         |      |   |
|----------------|---------------------|----------------------------------------------------------------------------------------------------|---------|------|---|
| <b>CDC73</b>   | <u>NM_024529</u>    | Cell division cycle 73, Paf1/RNA polymerase II complex component, homolog ( <i>S. Cerevisiae</i> ) | -0.22   | 0.4  | √ |
| <b>CDH13</b>   | <u>NM_001220488</u> | Cadherin 13, H-cadherin (heart)                                                                    | -0.11   | 0.47 |   |
| <b>CDK8</b>    | <u>NM_001260</u>    | Cyclin-dependent kinase 8                                                                          | -0.07   | 0.34 |   |
| <b>CDKL2</b>   | <u>NM_003948</u>    | Cyclin-dependent kinase-like 2 (CDC2-related kinase)                                               | -0.14   | 0.66 |   |
| <b>CDON</b>    | <u>NM_016952</u>    | Cdon homolog (mouse)                                                                               | -0.34   | 0.81 |   |
| <b>CDYL</b>    | <u>NM_001143970</u> | Chromodomain protein, Y-like                                                                       | -0.24   | 0.32 |   |
| <b>CEBPA</b>   | <u>NM_004364</u>    | CCAAT/enhancer binding protein (C/EBP), alpha                                                      | > -0.02 | 0.49 | √ |
| <b>CELSR3</b>  | <u>NM_001407</u>    | Cadherin, EGF LAG seven-pass G-type receptor 3 (flamingo homolog, <i>Drosophila</i> )              | > -0.01 | 0.41 |   |
| <b>CEP350</b>  | <u>NM_014810</u>    | Centrosomal protein 350kda                                                                         | > -0.03 | 0.33 |   |
| <b>CHD1</b>    | <u>NM_001270</u>    | Chromodomain helicase DNA binding protein 1                                                        | -0.05   | 0.34 |   |
| <b>CHD7</b>    | <u>NM_017780</u>    | Chromodomain helicase DNA binding protein 7                                                        | -0.05   | 0.69 |   |
| <b>CHD9</b>    | <u>NM_025134</u>    | Chromodomain helicase DNA binding protein 9                                                        | -0.11   | 0.54 |   |
| <b>CHIC1</b>   | <u>NM_001039840</u> | Cysteine-rich hydrophobic domain 1                                                                 | -0.09   | 0.44 |   |
| <b>CHMP1B</b>  | <u>NM_020412</u>    | Chromatin modifying protein 1B                                                                     | -0.31   | 0.59 |   |
| <b>CLCC1</b>   | <u>NM_001048210</u> | Chloride channel CLIC-like 1                                                                       | -0.1    | 0.41 |   |
| <b>CLIP1</b>   | <u>NM_002956</u>    | CAP-GLY domain containing linker protein 1                                                         | -0.33   | 0.49 |   |
| <b>CLMN</b>    | <u>NM_024734</u>    | Calmin (calponin-like, transmembrane)                                                              | -0.33   | 0.78 |   |
| <b>CLVS1</b>   | <u>NM_173519</u>    | Clavesin 1                                                                                         | -0.43   | 0.59 |   |
| <b>CNKSR2</b>  | <u>NM_001168647</u> | Connector enhancer of kinase suppressor of Ras 2                                                   | -0.06   | 0.65 |   |
| <b>CNKSR3</b>  | <u>NM_173515</u>    | CNKSR family member 3                                                                              | -0.27   | 0.47 |   |
| <b>CNOT6L</b>  | <u>NM_144571</u>    | CCR4-NOT transcription complex, subunit 6-like                                                     | > -0.05 | 0.44 |   |
| <b>CNR1</b>    | <u>NM_001160226</u> | Cannabinoid receptor 1 (brain)                                                                     | -0.08   | 0.53 |   |
| <b>CNTN4</b>   | <u>NM_001206955</u> | Contactin 4                                                                                        | -0.16   | <0.1 |   |
| <b>CNTNAP2</b> | <u>NM_014141</u>    | Contactin associated protein-like 2                                                                | -0.16   | 0.81 |   |

|                  |                              |                                                                                        |         |      |   |
|------------------|------------------------------|----------------------------------------------------------------------------------------|---------|------|---|
| <b>COL5A1</b>    | <a href="#">NM_000093</a>    | Collagen, type V, alpha 1                                                              | > -0.02 | 0.37 |   |
| <b>COMM6</b>     | <a href="#">NM_203495</a>    | COMM domain containing 6                                                               | -0.1    | 0.55 |   |
| <b>COPS2</b>     | <a href="#">NM_001143887</a> | COP9 constitutive photomorphogenic homolog subunit 2 (Arabidopsis)                     | -0.13   | 0.83 |   |
| <b>CPD</b>       | <a href="#">NM_001199775</a> | Carboxypeptidase D                                                                     | > -0.05 | 0.67 |   |
| <b>CPT1A</b>     | <a href="#">NM_001876</a>    | Carnitine palmitoyltransferase 1A (liver)                                              | -0.23   | 0.29 |   |
| <b>CREBL2</b>    | <a href="#">NM_001310</a>    | Camp responsive element binding protein-like 2                                         | > -0.04 | 0.49 | √ |
| <b>CRIM1</b>     | <a href="#">NM_016441</a>    | Cysteine rich transmembrane BMP regulator 1 (chordin-like)                             | > -0.03 | 0.6  |   |
| <b>CRISPLD1</b>  | <a href="#">NM_031461</a>    | Cysteine-rich secretory protein LCCL domain containing 1                               | -0.13   | 0.54 |   |
| <b>CSNK1G3</b>   | <a href="#">NM_001031812</a> | Casein kinase 1, gamma 3                                                               | -0.1    | 0.58 |   |
| <b>CSRNP3</b>    | <a href="#">NM_001172173</a> | Cysteine-serine-rich nuclear protein 3                                                 | > -0.03 | 0.54 |   |
| <b>CTDSPL</b>    | <a href="#">NM_001008392</a> | CTD (carboxy-terminal domain, RNA polymerase II, polypeptide A) small phosphatase-like | -0.37   | 0.95 |   |
| <b>CTIF</b>      | <a href="#">NM_001142397</a> | CBP80/20-dependent translation initiation factor                                       | > -0.03 | 0.37 |   |
| <b>CTTNBP2NL</b> | <a href="#">NM_018704</a>    | CTTNBP2 N-terminal like                                                                | -0.22   | 0.96 |   |
| <b>CUL3</b>      | <a href="#">NM_003590</a>    | Cullin 3                                                                               | -0.06   | 0.89 |   |
| <b>CUL4A</b>     | <a href="#">NM_001008895</a> | Cullin 4A                                                                              | -0.04   | 0.25 |   |
| <b>CXADR</b>     | <a href="#">NM_001207063</a> | Coxsackie virus and adenovirus receptor                                                | > -0.04 | 0.7  |   |
| <b>CYLD</b>      | <a href="#">NM_001042355</a> | Cylindromatosis (turban tumor syndrome)                                                | -0.06   | 0.57 | √ |
| <b>DCP1A</b>     | <a href="#">NM_018403</a>    | DCP1 decapping enzyme homolog A (S. Cerevisiae)                                        | > -0.01 | 0.26 |   |
| <b>DCP2</b>      | <a href="#">NM_001242377</a> | DCP2 decapping enzyme homolog (S. Cerevisiae)                                          | > -0.01 | 0.28 |   |
| <b>DDIT4</b>     | <a href="#">NM_019058</a>    | DNA-damage-inducible transcript 4                                                      | -0.18   | 0.62 |   |

|               |                              |                                                                  |         |      |   |
|---------------|------------------------------|------------------------------------------------------------------|---------|------|---|
| <b>DDX3X</b>  | <a href="#">NM_001193416</a> | DEAD (Asp-Glu-Ala-Asp) box polypeptide 3, X-linked               | -0.34   | 0.98 |   |
| <b>DDX3Y</b>  | <a href="#">NM_001122665</a> | DEAD (Asp-Glu-Ala-Asp) box polypeptide 3, Y-linked               | -0.36   | 0.66 |   |
| <b>DEPTOR</b> | <a href="#">NM_022783</a>    | DEP domain containing MTOR-interacting protein                   | -0.24   | 0.64 |   |
| <b>DERL1</b>  | <a href="#">NM_001134671</a> | Der1-like domain family, member 1                                | -0.21   | 0.69 |   |
| <b>DGCR2</b>  | <a href="#">NM_001173533</a> | Digeorge syndrome critical region gene 2                         | > -0.02 | 0.65 |   |
| <b>DIP2A</b>  | <a href="#">NM_001146116</a> | DIP2 disco-interacting protein 2 homolog A (Drosophila)          | > -0.01 | 0.31 |   |
| <b>DIP2B</b>  | <a href="#">NM_173602</a>    | DIP2 disco-interacting protein 2 homolog B (Drosophila)          | -0.16   | 0.73 |   |
| <b>DIP2C</b>  | <a href="#">NM_014974</a>    | DIP2 disco-interacting protein 2 homolog C (Drosophila)          | -0.1    | 0.61 |   |
| <b>DLG2</b>   | <a href="#">NM_001142699</a> | Discs, large homolog 2 (Drosophila)                              | -0.07   | 0.59 |   |
| <b>DLGAP2</b> | <a href="#">NM_004745</a>    | Discs, large (Drosophila) homolog-associated protein 2           | -0.12   | 0.93 |   |
| <b>DMXL2</b>  | <a href="#">NM_001174116</a> | Dmx-like 2                                                       | -0.16   | 0.85 |   |
| <b>DNAJA4</b> | <a href="#">NM_001130182</a> | Dnaj (Hsp40) homolog, subfamily A, member 4                      | -0.26   | 0.47 |   |
| <b>DNAL1</b>  | <a href="#">NM_001201366</a> | Dynein, axonemal, light chain 1                                  | -0.07   | 0.72 |   |
| <b>DOCK7</b>  | <a href="#">NM_033407</a>    | Dedicator of cytokinesis 7                                       | -0.12   | 0.65 |   |
| <b>DTNA</b>   | <a href="#">NM_001198939</a> | Dystrobrevin, alpha                                              | > -0.02 | 0.44 |   |
| <b>DUSP5</b>  | <a href="#">NM_004419</a>    | Dual specificity phosphatase 5                                   | -0.1    | 0.64 |   |
| <b>DYRK2</b>  | <a href="#">NM_003583</a>    | Dual-specificity tyrosine-(Y)-phosphorylation regulated kinase 2 | -0.1    | 0.65 |   |
| <b>EDAR</b>   | <a href="#">NM_022336</a>    | Ectodysplasin A receptor                                         | > -0.01 | 0.31 |   |
| <b>EGR2</b>   | <a href="#">NM_000399</a>    | Early growth response 2                                          | -0.07   | 0.32 |   |
| <b>EGR3</b>   | <a href="#">NM_001199880</a> | Early growth response 3                                          | > -0.03 | 0.71 |   |
| <b>EIF4A2</b> | <a href="#">NM_001967</a>    | Eukaryotic translation initiation factor 4A2                     | -0.23   | 0.37 | √ |

|                 |                              |                                                                            |         |      |   |
|-----------------|------------------------------|----------------------------------------------------------------------------|---------|------|---|
| <b>ELAVL4</b>   | <a href="#">NM_001144774</a> | ELAV (embryonic lethal, abnormal vision, Drosophila)-like 4 (Hu antigen D) | -0.14   | 0.67 |   |
| <b>EML1</b>     | <a href="#">NM_001008707</a> | Echinoderm microtubule associated protein like 1                           | > -0.01 | 0.5  |   |
| <b>EN1</b>      | <a href="#">NM_001426</a>    | Engrailed homeobox 1                                                       | -0.1    | 0.49 |   |
| <b>EN2</b>      | <a href="#">NM_001427</a>    | Engrailed homeobox 2                                                       | -0.2    | 0.8  |   |
| <b>ENAH</b>     | <a href="#">NM_001008493</a> | Enabled homolog (Drosophila)                                               | > -0.05 | 0.95 |   |
| <b>ENOX2</b>    | <a href="#">NM_006375</a>    | Ecto-NOX disulfide-thiol exchanger 2                                       | > -0.03 | 0.67 |   |
| <b>EPB41</b>    | <a href="#">NM_001166005</a> | Erythrocyte membrane protein band 4.1 (elliptocytosis 1, RH-linked)        | > -0.03 | 0.78 |   |
| <b>EPB41L3</b>  | <a href="#">NM_012307</a>    | Erythrocyte membrane protein band 4.1-like 3                               | -0.21   | 0.36 |   |
| <b>EPB41L4B</b> | <a href="#">NM_019114</a>    | Erythrocyte membrane protein band 4.1 like 4B                              | > -0.03 | 0.45 |   |
| <b>EPB49</b>    | <a href="#">NM_001114135</a> | Erythrocyte membrane protein band 4.9 (dematin)                            | -0.04   | 0.49 |   |
| <b>EPC2</b>     | <a href="#">NM_015630</a>    | Enhancer of polycomb homolog 2 (Drosophila)                                | -0.23   | 0.53 |   |
| <b>EPHA5</b>    | <a href="#">NM_004439</a>    | EPH receptor A5                                                            | -0.12   | 0.3  |   |
| <b>ERG</b>      | <a href="#">NM_001136154</a> | V-ets erythroblastosis virus E26 oncogene homolog (avian)                  | > -0.03 | 0.59 | √ |
| <b>ERMN</b>     | <a href="#">NM_001009959</a> | Ermin, ERM-like protein                                                    | > -0.03 | 0.15 |   |
| <b>ESR1</b>     | <a href="#">NM_000125</a>    | Estrogen receptor 1                                                        | > -0.03 | 0.71 |   |
| <b>ETNK1</b>    | <a href="#">NM_018638</a>    | Ethanolamine kinase 1                                                      | -0.14   | 0.64 |   |
| <b>ETS1</b>     | <a href="#">NM_001143820</a> | V-ets erythroblastosis virus E26 oncogene homolog 1 (avian)                | > -0.09 | 0.67 |   |
| <b>EVI2A</b>    | <a href="#">NM_001003927</a> | Ecotropic viral integration site 2A                                        | -0.19   | 0.31 |   |
| <b>EYA3</b>     | <a href="#">NM_001990</a>    | Eyes absent homolog 3 (Drosophila)                                         | > -0.02 | 0.58 |   |
| <b>FAM105B</b>  | <a href="#">NM_138348</a>    | Family with sequence similarity 105, member B                              | > -0.10 | <0.1 |   |
| <b>FAM122B</b>  | <a href="#">NM_001166599</a> | Family with sequence similarity 122B                                       | > -0.04 | <0.1 |   |
| <b>FAM135A</b>  | <a href="#">NM_001105531</a> | Family with sequence similarity 135, member A                              | -0.11   | 0.32 |   |



|                 |                     |                                                                                                          |         |      |   |
|-----------------|---------------------|----------------------------------------------------------------------------------------------------------|---------|------|---|
| <b>FAM160A2</b> | <u>NM_001098794</u> | Family with sequence similarity 160, member A2                                                           | -0.2    | 0.44 |   |
| <b>FAM171A1</b> | <u>NM_001010924</u> | Family with sequence similarity 171, member A1                                                           | -0.09   | 0.32 |   |
| <b>FAM179B</b>  | <u>NM_015091</u>    | Family with sequence similarity 179, member B                                                            | -0.2    | <0.1 |   |
| <b>FAM19A2</b>  | <u>NM_178539</u>    | Family with sequence similarity 19 (chemokine (C-C motif)-like), member A2                               | -0.06   | 0.35 |   |
| <b>FAM49A</b>   | <u>NM_030797</u>    | Family with sequence similarity 49, member A                                                             | > -0.02 | 0.57 |   |
| <b>FBXO33</b>   | <u>NM_203301</u>    | F-box protein 33                                                                                         | > -0.05 | 0.54 |   |
| <b>FBXO45</b>   | <u>NM_001105573</u> | F-box protein 45                                                                                         | -0.11   | 0.18 |   |
| <b>FGD4</b>     | <u>NM_139241</u>    | FYVE, rhogef and PH domain containing 4                                                                  | -0.34   | 0.81 |   |
| <b>FGFR3</b>    | <u>NM_000142</u>    | Fibroblast growth factor receptor 3                                                                      | > -0.02 | 0.42 | √ |
| <b>FIGNL2</b>   | <u>NM_001013690</u> | Fidgetin-like 2                                                                                          | > -0.05 | 0.76 |   |
| <b>FLT1</b>     | <u>NM_002019</u>    | Fms-related tyrosine kinase 1 (vascular endothelial growth factor/vascular permeability factor receptor) | -0.39   | 0.5  |   |
| <b>FNBP4</b>    | <u>NM_015308</u>    | Formin binding protein 4                                                                                 | -0.22   | <0.1 |   |
| <b>FOXK1</b>    | <u>NM_001037165</u> | Forkhead box K1                                                                                          | -0.15   | 0.81 |   |
| <b>FRYL</b>     | <u>NM_015030</u>    | FRY-like                                                                                                 | -0.03   | 0.41 |   |
| <b>FUZ</b>      | <u>NM_001171937</u> | Fuzzy homolog (Drosophila)                                                                               | -0.02   | 0.29 |   |
| <b>G3BP2</b>    | <u>NM_012297</u>    | Gtpase activating protein (SH3 domain) binding protein 2                                                 | -0.19   | 0.63 |   |
| <b>GABRA1</b>   | <u>NM_000806</u>    | Gamma-aminobutyric acid (GABA) A receptor, alpha 1                                                       | -0.24   | 0.87 |   |
| <b>GABRA4</b>   | <u>NM_000809</u>    | Gamma-aminobutyric acid (GABA) A receptor, alpha 4                                                       | -0.1    | 0.77 |   |
| <b>GATC</b>     | <u>NM_176818</u>    | Glutamyl-trna(Gln) amidotransferase, subunit C homolog (bacterial)                                       | > -0.01 | 0.63 |   |
| <b>GCC2</b>     | <u>NM_181453</u>    | GRIP and coiled-coil domain containing 2                                                                 | -0.2    | 0.78 |   |
| <b>GIGYF1</b>   | <u>NM_022574</u>    | GRB10 interacting GYF protein 1                                                                          | -0.09   | 0.93 |   |
| <b>GLI2</b>     | <u>NM_005270</u>    | GLI family zinc finger 2                                                                                 | > -0.01 | 0.29 |   |
| <b>GNAO1</b>    | <u>NM_020988</u>    | Guanine nucleotide binding protein (G protein), alpha activating activity polypeptide O                  | -0.06   | 0.31 |   |

|               |                     |                                                                         |         |       |   |
|---------------|---------------------|-------------------------------------------------------------------------|---------|-------|---|
| <b>GPD2</b>   | <u>NM_000408</u>    | Glycerol-3-phosphate dehydrogenase 2 (mitochondrial)                    | -0.32   | 0.35  |   |
| <b>GPR26</b>  | <u>NM_153442</u>    | G protein-coupled receptor 26                                           | -0.12   | 0.35  |   |
| <b>GRB10</b>  | <u>NM_001001549</u> | Growth factor receptor-bound protein 10                                 | -0.16   | 0.72  |   |
| <b>GRIA2</b>  | <u>NM_000826</u>    | Glutamate receptor, ionotropic, AMPA 2                                  | -0.09   | 0.68  |   |
| <b>GRID1</b>  | <u>NM_017551</u>    | Glutamate receptor, ionotropic, delta 1                                 | -0.06   | 0.55  |   |
| <b>GRIK2</b>  | <u>NM_001166247</u> | Glutamate receptor, ionotropic, kainate 2                               | -0.04   | 0.63  |   |
| <b>GRIK3</b>  | <u>NM_000831</u>    | Glutamate receptor, ionotropic, kainate 3                               | > -0.03 | 0.51  |   |
| <b>GRM1</b>   | <u>NM_001114329</u> | Glutamate receptor, metabotropic 1                                      | -0.13   | 0.76  |   |
| <b>GXYLT1</b> | <u>NM_001099650</u> | Glucoside xylosyltransferase 1                                          | > -0.02 | 0.41  |   |
| <b>H3F3B</b>  | <u>NM_005324</u>    | H3 histone, family 3B (H3.3B)                                           | -0.06   | 0.33  | √ |
| <b>HAND2</b>  | <u>NM_021973</u>    | Heart and neural crest derivatives expressed 2                          | > -0.02 | 0.52  |   |
| <b>HAPLN1</b> | <u>NM_001884</u>    | Hyaluronan and proteoglycan link protein 1                              | > -0.02 | 0.66  |   |
| <b>HAUS3</b>  | <u>NM_024511</u>    | HAUS augmin-like complex, subunit 3                                     | -0.12   | 0.33  |   |
| <b>HCN1</b>   | <u>NM_021072</u>    | Hyperpolarization activated cyclic nucleotide-gated potassium channel 1 | -0.28   | 0.12  |   |
| <b>HECW2</b>  | <u>NM_020760</u>    | HECT, C2 and WW domain containing E3 ubiquitin protein ligase 2         | > -0.03 | 0.41  |   |
| <b>HEMGN</b>  | <u>NM_018437</u>    | Hemogen                                                                 | -0.27   | < 0.1 |   |
| <b>HEXIM1</b> | <u>NM_006460</u>    | Hexamethylene bis-acetamide inducible 1                                 | -0.1    | 0.49  |   |
| <b>HIC2</b>   | <u>NM_015094</u>    | Hypermethylated in cancer 2                                             | > -0.08 | 0.94  |   |
| <b>HIPK2</b>  | <u>NM_001113239</u> | Homeodomain interacting protein kinase 2                                | > -0.04 | 0.47  |   |
| <b>HLF</b>    | <u>NM_002126</u>    | Hepatic leukemia factor                                                 | > -0.03 | 0.71  | √ |
| <b>HMBS</b>   | <u>NM_000190</u>    | Hydroxymethylbilane synthase                                            | -0.3    | 0.77  |   |
| <b>HOXA11</b> | <u>NM_005523</u>    | Homeobox A11                                                            | -0.2    | 0.72  | √ |
| <b>HOXB8</b>  | <u>NM_024016</u>    | Homeobox B8                                                             | -0.06   | 0.45  |   |
| <b>HOXC8</b>  | <u>NM_022658</u>    | Homeobox C8                                                             | -0.45   | 0.88  |   |
| <b>HS2ST1</b> | <u>NM_012262</u>    | Heparan sulfate 2-O-sulfotransferase 1                                  | > -0.03 | 0.52  |   |
| <b>HS6ST3</b> | <u>NM_153456</u>    | Heparan sulfate 6-O-sulfotransferase 3                                  | -0.1    | 0.33  |   |

|                    |                              |                                                                                                     |         |      |   |
|--------------------|------------------------------|-----------------------------------------------------------------------------------------------------|---------|------|---|
| <b>HSP90B1</b>     | <a href="#">NM_003299</a>    | Heat shock protein 90kda beta (Grp94), member 1                                                     | -0.32   | 0.29 |   |
| <b>HSPC159</b>     | <a href="#">NM_014181</a>    | Galectin-related protein                                                                            | -0.23   | 0.92 |   |
| <b>HTT</b>         | <a href="#">NM_002111</a>    | Huntingtin                                                                                          | > -0.06 | <0.1 |   |
| <b>HYOU1</b>       | <a href="#">NM_001130991</a> | Hypoxia up-regulated 1                                                                              | -0.08   | 0.68 |   |
| <b>IGDCC3</b>      | <a href="#">NM_004884</a>    | Immunoglobulin superfamily, DCC subclass, member 3                                                  | > -0.03 | 0.87 |   |
| <b>IGF2BP3</b>     | <a href="#">NM_006547</a>    | Insulin-like growth factor 2 mrna binding protein 3                                                 | -0.05   | 0.38 |   |
| <b>ILF3</b>        | <a href="#">NM_012218</a>    | Interleukin enhancer binding factor 3, 90kda                                                        | -0.1    | 0.48 |   |
| <b>IPMK</b>        | <a href="#">NM_152230</a>    | Inositol polyphosphate multikinase                                                                  | -0.27   | 0.58 |   |
| <b>IPO5</b>        | <a href="#">NM_002271</a>    | Importin 5                                                                                          | -0.04   | 0.93 |   |
| <b>IQCJ-SCHIP1</b> | <a href="#">NM_001197113</a> | IQCJ-SCHIP1 readthrough                                                                             | -0.14   | 0.55 |   |
| <b>ITGA3</b>       | <a href="#">NM_002204</a>    | Integrin, alpha 3 (antigen CD49C, alpha 3 subunit of VLA-3 receptor)                                | -0.16   | 0.67 |   |
| <b>ITGA6</b>       | <a href="#">NM_000210</a>    | Integrin, alpha 6                                                                                   | -0.06   | 0.34 |   |
| <b>KALRN</b>       | <a href="#">NM_003947</a>    | Kalirin, rhogef kinase                                                                              | -0.16   | 0.48 |   |
| <b>KANK1</b>       | <a href="#">NM_015158</a>    | KN motif and ankyrin repeat domains 1                                                               | -0.26   | 0.41 |   |
| <b>KBTBD7</b>      | <a href="#">NM_032138</a>    | Kelch repeat and BTB (POZ) domain containing 7                                                      | -0.09   | 0.3  |   |
| <b>KCMF1</b>       | <a href="#">NM_020122</a>    | Potassium channel modulatory factor 1                                                               | > -0.01 | 0.62 |   |
| <b>KCNA1</b>       | <a href="#">NM_000217</a>    | Potassium voltage-gated channel, shaker-related subfamily, member 1 (episodic ataxia with myokymia) | -0.2    | 0.65 |   |
| <b>KCNH8</b>       | <a href="#">NM_144633</a>    | Potassium voltage-gated channel, subfamily H (eag-related), member 8                                | -0.15   | 0.43 |   |
| <b>KCNJ10</b>      | <a href="#">NM_002241</a>    | Potassium inwardly-rectifying channel, subfamily J, member 10                                       | > -0.03 | 0.32 |   |
| <b>KCNN3</b>       | <a href="#">NM_001204087</a> | Potassium intermediate/small conductance calcium-activated channel, subfamily N, member 3           | > -0.05 | 0.58 |   |
| <b>KCTD10</b>      | <a href="#">NM_031954</a>    | Potassium channel tetramerisation domain containing 10                                              | > -0.06 | 0.44 |   |
| <b>KDM5A</b>       | <a href="#">NM_001042603</a> | Lysine (K)-specific demethylase 5A                                                                  | > -0.07 | 0.77 | √ |
| <b>KHSRP</b>       | <a href="#">NM_003685</a>    | KH-type splicing regulatory protein                                                                 | N/A     | 0.71 |   |
| <b>KIAA0226</b>    | <a href="#">NM_001145642</a> | KIAA0226                                                                                            | > -0.04 | 0.49 |   |

|                  |                     |                                               |         |      |   |
|------------------|---------------------|-----------------------------------------------|---------|------|---|
| <b>KIAA0247</b>  | <u>NM_014734</u>    | KIAA0247                                      | -0.12   | 0.42 |   |
| <b>KIAA0664</b>  | <u>NM_015229</u>    | KIAA0664                                      | > -0.03 | 0.68 |   |
| <b>KIAA1244</b>  | <u>NM_020340</u>    | KIAA1244                                      | > -0.05 | 0.61 |   |
| <b>KIAA1324L</b> | <u>NM_001142749</u> | KIAA1324-like                                 | > -0.04 | 0.58 |   |
| <b>KIAA1462</b>  | <u>NM_020848</u>    | KIAA1462                                      | -0.14   | 0.64 |   |
| <b>KIAA1467</b>  | <u>NM_020853</u>    | KIAA1467                                      | -0.06   | 0.32 |   |
| <b>KIAA1549</b>  | <u>NM_001164665</u> | KIAA1549                                      | -0.02   | 0.52 | √ |
| <b>KIAA1715</b>  | <u>NM_030650</u>    | KIAA1715                                      | -0.23   | 0.38 |   |
| <b>KIAA2022</b>  | <u>NM_001008537</u> | KIAA2022                                      | > -0.09 | 0.92 |   |
| <b>KIF1C</b>     | <u>NM_006612</u>    | Kinesin family member 1C                      | > -0.01 | 0.3  |   |
| <b>KITLG</b>     | <u>NM_000899</u>    | KIT ligand                                    | > -0.06 | 0.37 |   |
| <b>KLF15</b>     | <u>NM_014079</u>    | Kruppel-like factor 15                        | -0.28   | 0.73 |   |
| <b>KLF3</b>      | <u>NM_016531</u>    | Kruppel-like factor 3 (basic)                 | -0.07   | 0.81 |   |
| <b>KLHDC5</b>    | <u>NM_020782</u>    | Kelch domain containing 5                     | -0.12   | 0.5  |   |
| <b>KLHL15</b>    | <u>NM_030624</u>    | Kelch-like 15 (Drosophila)                    | > -0.03 | 0.36 |   |
| <b>KLHL2</b>     | <u>NM_001161521</u> | Kelch-like 2, Mayven (Drosophila)             | -0.27   | 0.4  |   |
| <b>KLHL29</b>    | <u>NM_052920</u>    | Kelch-like 29 (Drosophila)                    | -0.26   | 0.52 |   |
| <b>KLHL5</b>     | <u>NM_001007075</u> | Kelch-like 5 (Drosophila)                     | -0.09   | 0.88 |   |
| <b>KREMEN1</b>   | <u>NM_001039570</u> | Kringle containing transmembrane protein 1    | -0.1    | 0.51 |   |
| <b>L1CAM</b>     | <u>NM_000425</u>    | L1 cell adhesion molecule                     | -0.02   | 0.54 |   |
| <b>LAMC1</b>     | <u>NM_002293</u>    | Laminin, gamma 1 (formerly LAMB2)             | > -0.02 | 0.63 |   |
| <b>LARP4</b>     | <u>NM_001170803</u> | La ribonucleoprotein domain family, member 4  | -0.2    | 0.86 |   |
| <b>LBR</b>       | <u>NM_002296</u>    | Lamin B receptor                              | -0.14   | 0.45 |   |
| <b>LCOR</b>      | <u>NM_001170765</u> | Ligand dependent nuclear receptor corepressor | -0.15   | 0.72 |   |

|                     |                              |                                                                 |         |      |   |
|---------------------|------------------------------|-----------------------------------------------------------------|---------|------|---|
| <b>LCORL</b>        | <a href="#">NM_001166139</a> | Ligand dependent nuclear receptor corepressor-like              | -0.11   | 0.67 |   |
| <b>LGI2</b>         | <a href="#">NM_018176</a>    | Leucine-rich repeat LGI family, member 2                        | -0.09   | 0.53 |   |
| <b>LHFPL3</b>       | <a href="#">NM_199000</a>    | Lipoma HMGIC fusion partner-like 3                              | -0.17   | 0.41 |   |
| <b>LIMCH1</b>       | <a href="#">NM_001112717</a> | LIM and calponin homology domains 1                             | > -0.03 | 0.34 |   |
| <b>LIMS1</b>        | <a href="#">NM_001193482</a> | LIM and senescent cell antigen-like domains 1                   | > -0.02 | 0.34 |   |
| <b>LIN7C</b>        | <a href="#">NM_018362</a>    | Lin-7 homolog C (C. Elegans)                                    | > -0.02 | 0.52 |   |
| <b>LMBRD2</b>       | <a href="#">NM_001007527</a> | LMBR1 domain containing 2                                       | -0.27   | 0.4  |   |
| <b>LMO1</b>         | <a href="#">NM_002315</a>    | LIM domain only 1 (rhombotin 1)                                 | -0.17   | 0.51 | √ |
| <b>LMO3</b>         | <a href="#">NM_001001395</a> | LIM domain only 3 (rhombotin-like 2)                            | -0.18   | 0.8  |   |
| <b>LMX1A</b>        | <a href="#">NM_001174069</a> | LIM homeobox transcription factor 1, alpha                      | -0.04   | 0.38 |   |
| <b>LNX2</b>         | <a href="#">NM_153371</a>    | Ligand of numb-protein X 2                                      | > -0.01 | 0.32 |   |
| <b>LOC100507421</b> | <a href="#">NM_001195278</a> | Transmembrane protein 178-like                                  | -0.15   | 0.72 |   |
| <b>LPCAT1</b>       | <a href="#">NM_024830</a>    | Lysophosphatidylcholine acyltransferase 1                       | -0.15   | 0.69 |   |
| <b>LPGAT1</b>       | <a href="#">NM_014873</a>    | Lysophosphatidylglycerol acyltransferase 1                      | > -0.03 | 0.46 |   |
| <b>LPP</b>          | <a href="#">NM_001167671</a> | LIM domain containing preferred translocation partner in lipoma | > -0.10 | 0.9  | √ |
| <b>LPPR4</b>        | <a href="#">NM_001166252</a> | Lipid phosphate phosphatase-related protein type 4              | -0.04   | 0.66 |   |
| <b>LRBA</b>         | <a href="#">NM_001199282</a> | LPS-responsive vesicle trafficking, beach and anchor containing | -0.26   | 0.39 |   |
| <b>LRP12</b>        | <a href="#">NM_001135703</a> | Low density lipoprotein receptor-related protein 12             | -0.12   | 0.5  |   |
| <b>LRP6</b>         | <a href="#">NM_002336</a>    | Low density lipoprotein receptor-related protein 6              | > -0.02 | 0.55 |   |
| <b>LRRC32</b>       | <a href="#">NM_001128922</a> | Leucine rich repeat containing 32                               | -0.25   | 0.65 |   |
| <b>LRRK2</b>        | <a href="#">NM_198578</a>    | Leucine-rich repeat kinase 2                                    | -0.04   | 0.39 |   |

|                  |                              |                                                               |         |      |   |
|------------------|------------------------------|---------------------------------------------------------------|---------|------|---|
| <b>LTN1</b>      | <a href="#">NM_015565</a>    | Listerin E3 ubiquitin protein ligase 1                        | > -0.02 | 0.31 |   |
| <b>LUZP1</b>     | <a href="#">NM_001142546</a> | Leucine zipper protein 1                                      | > -0.01 | 0.59 |   |
| <b>LYPLA2</b>    | <a href="#">NM_007260</a>    | Lysophospholipase II                                          | > -0.02 | 0.57 |   |
| <b>MADD</b>      | <a href="#">NM_001135943</a> | MAP-kinase activating death domain                            | -0.16   | 0.74 |   |
| <b>MAEA</b>      | <a href="#">NM_001017405</a> | Macrophage erythroblast attacher                              | -0.02   | 0.6  |   |
| <b>MAMDC2</b>    | <a href="#">NM_153267</a>    | MAM domain containing 2                                       | -0.23   | 0.78 |   |
| <b>MAP1A</b>     | <a href="#">NM_002373</a>    | Microtubule-associated protein 1A                             | -0.04   | 0.75 |   |
| <b>MAP2K1</b>    | <a href="#">NM_002755</a>    | Mitogen-activated protein kinase kinase 1                     | -0.21   | 0.38 | √ |
| <b>MAP3K10</b>   | <a href="#">NM_002446</a>    | Mitogen-activated protein kinase kinase kinase 10             | -0.12   | 0.58 |   |
| <b>MAP3K3</b>    | <a href="#">NM_002401</a>    | Mitogen-activated protein kinase kinase kinase 3              | > -0.03 | 0.68 |   |
| <b>MAP3K9</b>    | <a href="#">NM_033141</a>    | Mitogen-activated protein kinase kinase kinase 9              | > -0.02 | 0.48 |   |
| <b>MAP4K4</b>    | <a href="#">NM_001242559</a> | Mitogen-activated protein kinase kinase kinase kinase 4       | > -0.01 | 0.61 |   |
| <b>MAPK1IP1L</b> | <a href="#">NM_144578</a>    | Mitogen-activated protein kinase 1 interacting protein 1-like | > -0.03 | 0.51 |   |
| <b>MARCKS</b>    | <a href="#">NM_002356</a>    | Myristoylated alanine-rich protein kinase C substrate         | > -0.01 | 0.42 |   |
| <b>MARK1</b>     | <a href="#">NM_018650</a>    | MAP/microtubule affinity-regulating kinase 1                  | -0.44   | 0.4  |   |
| <b>MBD2</b>      | <a href="#">NM_003927</a>    | Methyl-cpg binding domain protein 2                           | > -0.01 | 0.4  |   |
| <b>MBNL1</b>     | <a href="#">NM_021038</a>    | Muscleblind-like (Drosophila)                                 | -0.05   | 0.66 |   |
| <b>MBNL2</b>     | <a href="#">NM_144778</a>    | Muscleblind-like 2 (Drosophila)                               | -0.04   | 0.52 |   |
| <b>MCART6</b>    | <a href="#">NM_001012755</a> | Mitochondrial carrier triple repeat 6                         | > -0.02 | 0.7  |   |
| <b>MCC</b>       | <a href="#">NM_001085377</a> | Mutated in colorectal cancers                                 | -0.2    | 0.73 |   |
| <b>MCL1</b>      | <a href="#">NM_001197320</a> | Myeloid cell leukemia sequence 1 (BCL2-related)               | > -0.01 | 0.55 |   |
| <b>MECP2</b>     | <a href="#">NM_004992</a>    | Methyl cpg binding protein 2 (Rett syndrome)                  | -0.17   | 0.46 |   |
| <b>MEF2A</b>     | <a href="#">NM_001130926</a> | Myocyte enhancer factor 2A                                    | -0.14   | 0.75 |   |
| <b>METAP1</b>    | <a href="#">NM_015143</a>    | Methionyl aminopeptidase 1                                    | -0.34   | 0.48 |   |

|                |                              |                                                            |         |      |  |
|----------------|------------------------------|------------------------------------------------------------|---------|------|--|
| <b>MEX3A</b>   | <a href="#">NM_001093725</a> | Mex-3 homolog A ( <i>C. Elegans</i> )                      | > -0.02 | 0.57 |  |
| <b>MEX3B</b>   | <a href="#">NM_032246</a>    | Mex-3 homolog B ( <i>C. Elegans</i> )                      | -0.06   | 0.38 |  |
| <b>MFAP3L</b>  | <a href="#">NM_001009554</a> | Microfibrillar-associated protein 3-like                   | -0.08   | 0.78 |  |
| <b>MGA</b>     | <a href="#">NM_001080541</a> | MAX gene associated                                        | > -0.01 | 0.48 |  |
| <b>MINK1</b>   | <a href="#">NM_001024937</a> | Misshapen-like kinase 1                                    | > -0.03 | 0.65 |  |
| <b>MIP</b>     | <a href="#">NM_012064</a>    | Major intrinsic protein of lens fiber                      | -0.08   | 0.55 |  |
| <b>MKNK2</b>   | <a href="#">NM_199054</a>    | MAP kinase interacting serine/threonine kinase 2           | > -0.02 | 0.52 |  |
| <b>MKRN1</b>   | <a href="#">NM_001145125</a> | Makorin ring finger protein 1                              | -0.18   | <0.1 |  |
| <b>MMP14</b>   | <a href="#">NM_004995</a>    | Matrix metalloproteinase 14 (membrane-inserted)            | > -0.02 | 0.56 |  |
| <b>MNX1</b>    | <a href="#">NM_001165255</a> | Motor neuron and pancreas homeobox 1                       | -0.09   | 0.53 |  |
| <b>MOBKL2B</b> | <a href="#">NM_024761</a>    | MOB1, Mps One Binder kinase activator-like 2B (yeast)      | > -0.02 | 0.49 |  |
| <b>MOSPD1</b>  | <a href="#">NM_019556</a>    | Motile sperm domain containing 1                           | -0.15   | 0.73 |  |
| <b>MSL2</b>    | <a href="#">NM_001145417</a> | Male-specific lethal 2 homolog ( <i>Drosophila</i> )       | > -0.02 | 0.42 |  |
| <b>MTF1</b>    | <a href="#">NM_005955</a>    | Metal-regulatory transcription factor 1                    | > -0.04 | 0.71 |  |
| <b>MTF2</b>    | <a href="#">NM_001164391</a> | Metal response element binding transcription factor 2      | -0.28   | 0.79 |  |
| <b>MTMR10</b>  | <a href="#">NM_017762</a>    | Myotubularin related protein 10                            | -0.2    | 0.76 |  |
| <b>MTMR12</b>  | <a href="#">NM_001040446</a> | Myotubularin related protein 12                            | -0.13   | 0.6  |  |
| <b>MTMR9</b>   | <a href="#">NM_015458</a>    | Myotubularin related protein 9                             | -0.12   | 0.78 |  |
| <b>MTPN</b>    | <a href="#">NM_145808</a>    | Myotrophin                                                 | > -0.03 | 0.6  |  |
| <b>MYBL1</b>   | <a href="#">NM_001080416</a> | V-myb myeloblastosis viral oncogene homolog (avian)-like 1 | -0.12   | 0.61 |  |
| <b>MYCBP</b>   | <a href="#">NM_012333</a>    | C-myc binding protein                                      | > -0.01 | 0.45 |  |
| <b>MYCBP2</b>  | <a href="#">NM_015057</a>    | MYC binding protein 2                                      | -0.09   | 0.31 |  |

|                 |                     |                                                                 |         |      |   |
|-----------------|---------------------|-----------------------------------------------------------------|---------|------|---|
| <b>MYH10</b>    | <u>NM_005964</u>    | Myosin, heavy chain 10, non-muscle                              | > -0.02 | 0.62 |   |
| <b>MYNN</b>     | <u>NM_001185118</u> | Myoneurin                                                       | > -0.04 | <0.1 |   |
| <b>MYO1E</b>    | <u>NM_004998</u>    | Myosin IE                                                       | -0.27   | 0.74 |   |
| <b>NAA50</b>    | <u>NM_025146</u>    | N(alpha)-acetyltransferase 50, nate catalytic subunit           | > -0.03 | 0.8  |   |
| <b>NAALADL2</b> | <u>NM_207015</u>    | <i>N</i> -acetylated $\alpha$ -linked acidic dipeptidase-like 2 | -0.12   | 0.68 |   |
| <b>NAB1</b>     | <u>NM_005966</u>    | NGFI-A binding protein 1 (EGR1 binding protein 1)               | -0.07   | 0.42 |   |
| <b>NACC2</b>    | <u>NM_144653</u>    | NACC family member 2, BEN and BTB (POZ) domain containing       | > -0.05 | 0.93 |   |
| <b>NAP1L5</b>   | <u>NM_153757</u>    | Nucleosome assembly protein 1-like 5                            | -0.03   | 0.26 |   |
| <b>NBEA</b>     | <u>NM_001204197</u> | Neurobeachin                                                    | -0.04   | 0.39 |   |
| <b>NCOA2</b>    | <u>NM_006540</u>    | Nuclear receptor coactivator 2                                  | -0.25   | 0.62 | √ |
| <b>NDRG2</b>    | <u>NM_016250</u>    | NDRG family member 2                                            | > -0.02 | 0.31 |   |
| <b>NEGR1</b>    | <u>NM_173808</u>    | Neuronal growth regulator 1                                     | > -0.05 | 0.63 |   |
| <b>NEO1</b>     | <u>NM_001172623</u> | Neogenin 1                                                      | > -0.02 | 0.36 |   |
| <b>NFAT5</b>    | <u>NM_001113178</u> | Nuclear factor of activated T-cells 5, tonicity-responsive      | -0.25   | 0.67 |   |
| <b>NFIB</b>     | <u>NM_001190737</u> | Nuclear factor I/B                                              | > -0.05 | 0.39 | √ |
| <b>NKX3-2</b>   | <u>NM_001189</u>    | NK3 homeobox 2                                                  | > -0.03 | 0.49 |   |
| <b>NLK</b>      | <u>NM_016231</u>    | Nemo-like kinase                                                | -0.07   | 0.63 |   |
| <b>NLN</b>      | <u>NM_020726</u>    | Neurolysin (metallopeptidase M3 family)                         | -0.3    | 0.67 |   |
| <b>NMNAT2</b>   | <u>NM_015039</u>    | Nicotinamide nucleotide adenylyltransferase 2                   | > -0.03 | 0.51 |   |
| <b>NOL4</b>     | <u>NM_001198546</u> | Nucleolar protein 4                                             | > -0.02 | 0.51 |   |
| <b>NOTCH2</b>   | <u>NM_024408</u>    | Notch 2                                                         | -0.11   | 0.71 | √ |
| <b>NPTN</b>     | <u>NM_001161363</u> | Neuroplastin                                                    | -0.08   | 0.38 |   |
| <b>NR1D2</b>    | <u>NM_001145425</u> | Nuclear receptor subfamily 1, group D, member 2                 | -0.26   | 0.89 |   |
| <b>NR2C2</b>    | <u>NM_003298</u>    | Nuclear receptor subfamily 2, group C, member 2                 | -0.08   | 0.7  |   |



|                 |                              |                                                                              |         |       |   |
|-----------------|------------------------------|------------------------------------------------------------------------------|---------|-------|---|
| <b>NR3C1</b>    | <a href="#">NM_000176</a>    | Nuclear receptor subfamily 3, group C, member 1 (glucocorticoid receptor)    | > -0.05 | 0.72  |   |
| <b>NR6A1</b>    | <a href="#">NM_001489</a>    | Nuclear receptor subfamily 6, group A, member 1                              | -0.3    | 0.6   |   |
| <b>NRP1</b>     | <a href="#">NM_003873</a>    | Neuropilin 1                                                                 | > -0.01 | 0.37  |   |
| <b>NRXN1</b>    | <a href="#">NM_001135659</a> | Neurexin 1                                                                   | -0.07   | 0.47  |   |
| <b>NUDT12</b>   | <a href="#">NM_031438</a>    | Nudix (nucleoside diphosphate linked moiety X)-type motif 12                 | -0.54   | 0.49  |   |
| <b>NUFIP2</b>   | <a href="#">NM_020772</a>    | Nuclear fragile X mental retardation protein interacting protein 2           | > -0.03 | 0.55  |   |
| <b>ONECUT2</b>  | <a href="#">NM_004852</a>    | One cut homeobox 2                                                           | -0.23   | 0.92  |   |
| <b>OTUD4</b>    | <a href="#">NM_001102653</a> | OTU domain containing 4                                                      | -0.29   | 0.27  |   |
| <b>PAFAH1B1</b> | <a href="#">NM_000430</a>    | Platelet-activating factor acetylhydrolase 1b, regulatory subunit 1 (45 kDa) | -0.11   | 0.37  |   |
| <b>PAFAH1B2</b> | <a href="#">NM_002572</a>    | Platelet-activating factor acetylhydrolase 1b, catalytic subunit 2 (30 kDa)  | > -0.05 | 0.46  | √ |
| <b>PAG1</b>     | <a href="#">NM_018440</a>    | Phosphoprotein associated with glycosphingolipid microdomains 1              | > -0.04 | 0.41  |   |
| <b>PAK7</b>     | <a href="#">NM_020341</a>    | P21 protein (Cdc42/Rac)-activated kinase 7                                   | -0.05   | 0.5   |   |
| <b>PAN3</b>     | <a href="#">NM_175854</a>    | PAN3 poly(A) specific ribonuclease subunit homolog ( <i>S. Cerevisiae</i> )  | > -0.02 | 0.33  |   |
| <b>PANK3</b>    | <a href="#">NM_024594</a>    | Pantothenate kinase 3                                                        | -0.06   | 0.37  |   |
| <b>PAPD5</b>    | <a href="#">NM_001040284</a> | PAP associated domain containing 5                                           | -0.33   | 0.94  |   |
| <b>PAPOLG</b>   | <a href="#">NM_022894</a>    | Poly(A) polymerase gamma                                                     | -0.09   | 0.8   |   |
| <b>PARK2</b>    | <a href="#">NM_004562</a>    | Parkinson protein 2, E3 ubiquitin protein ligase (parkin)                    | -0.2    | 0.39  |   |
| <b>PAWR</b>     | <a href="#">NM_002583</a>    | PRKC, apoptosis, WT1, regulator                                              | -0.2    | 0.36  |   |
| <b>PBMUCL1</b>  | <a href="#">NM_001198815</a> | Panbronchiolitis related mucin-like 1                                        | -0.34   | < 0.1 |   |
| <b>PBX1</b>     | <a href="#">NM_001204961</a> | Pre-B-cell leukemia homeobox 1                                               | > -0.02 | 0.76  | √ |

|                |                              |                                                                                              |         |      |  |
|----------------|------------------------------|----------------------------------------------------------------------------------------------|---------|------|--|
| <b>PBX3</b>    | <a href="#">NM_001134778</a> | Pre-B-cell leukemia homeobox 3                                                               | -0.18   | 0.49 |  |
| <b>PCGF2</b>   | <a href="#">NM_007144</a>    | Polycomb group ring finger 2                                                                 | > -0.02 | 0.67 |  |
| <b>PDAP1</b>   | <a href="#">NM_014891</a>    | PDGFA associated protein 1                                                                   | -0.16   | 0.71 |  |
| <b>PDE10A</b>  | <a href="#">NM_001130690</a> | Phosphodiesterase 10A                                                                        | -0.06   | 0.7  |  |
| <b>PDPK1</b>   | <a href="#">NM_002613</a>    | 3-phosphoinositide dependent protein kinase-1                                                | -0.17   | 0.81 |  |
| <b>PDXDC1</b>  | <a href="#">NM_015027</a>    | Pyridoxal-dependent decarboxylase domain containing 1                                        | -0.19   | 0.69 |  |
| <b>PEAK1</b>   | <a href="#">NM_024776</a>    | NKF3 kinase family member                                                                    | -0.14   | 0.8  |  |
| <b>PGR</b>     | <a href="#">NM_000926</a>    | Progesterone receptor                                                                        | > -0.06 | <0.1 |  |
| <b>PHACTR2</b> | <a href="#">NM_001100164</a> | Phosphatase and actin regulator 2                                                            | -0.17   | 0.64 |  |
| <b>PHC3</b>    | <a href="#">NM_024947</a>    | Polyhomeotic homolog 3 (Drosophila)                                                          | > -0.05 | 0.78 |  |
| <b>PHF2</b>    | <a href="#">NM_005392</a>    | PHD finger protein 2                                                                         | > -0.01 | 0.4  |  |
| <b>PHIP</b>    | <a href="#">NM_017934</a>    | Pleckstrin homology domain interacting protein                                               | > -0.06 | 0.88 |  |
| <b>PHKA1</b>   | <a href="#">NM_001122670</a> | Phosphorylase kinase, alpha 1 (muscle)                                                       | > -0.03 | <0.1 |  |
| <b>PHLDA1</b>  | <a href="#">NM_007350</a>    | Pleckstrin homology-like domain, family A, member 1                                          | -0.2    | 0.81 |  |
| <b>PHLPP2</b>  | <a href="#">NM_015020</a>    | PH domain and leucine rich repeat protein phosphatase 2                                      | -0.1    | <0.1 |  |
| <b>PHTF2</b>   | <a href="#">NM_001127357</a> | Putative homeodomain transcription factor 2                                                  | -0.2    | 0.22 |  |
| <b>PI4K2A</b>  | <a href="#">NM_018425</a>    | Phosphatidylinositol 4-kinase type 2 alpha                                                   | > -0.02 | 0.63 |  |
| <b>PIP4K2B</b> | <a href="#">NM_003559</a>    | Phosphatidylinositol-5-phosphate 4-kinase, type II, beta                                     | > -0.03 | 0.55 |  |
| <b>PJA2</b>    | <a href="#">NM_014819</a>    | Praja ring finger 2                                                                          | -0.09   | 0.58 |  |
| <b>PKDCC</b>   | <a href="#">NM_138370</a>    | Protein kinase domain containing, cytoplasmic homolog (mouse)                                | > -0.01 | 0.38 |  |
| <b>PLAU</b>    | <a href="#">NM_001145031</a> | Plasminogen activator, urokinase                                                             | -0.19   | 0.13 |  |
| <b>PLCXD3</b>  | <a href="#">NM_001005473</a> | Phosphatidylinositol-specific phospholipase C, X domain containing 3                         | > -0.03 | 0.44 |  |
| <b>PLEKHA3</b> | <a href="#">NM_019091</a>    | Pleckstrin homology domain containing, family A (phosphoinositide binding specific) member 3 | -0.16   | 0.36 |  |
| <b>PNRC2</b>   | <a href="#">NM_017761</a>    | Proline-rich nuclear receptor coactivator 2                                                  | -0.25   | 0.68 |  |

|                 |                              |                                                               |         |      |   |
|-----------------|------------------------------|---------------------------------------------------------------|---------|------|---|
| <b>PODXL</b>    | <a href="#">NM_001018111</a> | Podocalyxin-like                                              | -0.07   | 0.85 |   |
| <b>POU2F1</b>   | <a href="#">NM_001198783</a> | POU class 2 homeobox 1                                        | > -0.10 | 0.98 |   |
| <b>PPAP2B</b>   | <a href="#">NM_003713</a>    | Phosphatidic acid phosphatase type 2B                         | -0.06   | 0.53 |   |
| <b>PPARA</b>    | <a href="#">NM_001001928</a> | Peroxisome proliferator-activated receptor alpha              | -0.26   | 0.72 |   |
| <b>PPP5K2</b>   | <a href="#">NM_015216</a>    | Diphosphoinositol pentakisphosphate kinase 2                  | -0.57   | 0.66 |   |
| <b>PPP1CB</b>   | <a href="#">NM_002709</a>    | Protein phosphatase 1, catalytic subunit, beta isozyme        | > -0.02 | 0.81 |   |
| <b>PPP1R2</b>   | <a href="#">NM_006241</a>    | Protein phosphatase 1, regulatory (inhibitor) subunit 2       | -0.14   | 0.62 |   |
| <b>PPP1R3B</b>  | <a href="#">NM_001201329</a> | Protein phosphatase 1, regulatory (inhibitor) subunit 3B      | -0.28   | 0.7  |   |
| <b>PPP2R3A</b>  | <a href="#">NM_001190447</a> | Protein phosphatase 2, regulatory subunit B', alpha           | -0.17   | 0.44 |   |
| <b>PPP2R5E</b>  | <a href="#">NM_006246</a>    | Protein phosphatase 2, regulatory subunit B', epsilon isoform | > -0.02 | 0.56 |   |
| <b>PQLC1</b>    | <a href="#">NM_001146343</a> | PQ loop repeat containing 1                                   | -0.23   | <0.1 |   |
| <b>PRDM1</b>    | <a href="#">NM_001198</a>    | PR domain containing 1, with ZNF domain                       | -0.09   | 0.48 | √ |
| <b>PRICKLE2</b> | <a href="#">NM_198859</a>    | Prickle homolog 2 (Drosophila)                                | -0.09   | 0.62 |   |
| <b>PRKCD</b>    | <a href="#">NM_006254</a>    | Protein kinase C, delta                                       | -0.26   | 0.67 |   |
| <b>PRLR</b>     | <a href="#">NM_000949</a>    | Prolactin receptor                                            | -0.13   | 0.12 |   |
| <b>PRRC2C</b>   | <a href="#">NM_015172</a>    | Proline-rich coiled-coil 2C                                   | -0.11   | 0.69 |   |
| <b>PSAP</b>     | <a href="#">NM_001042465</a> | Prosaposin                                                    | > -0.03 | 0.47 |   |
| <b>PSMF1</b>    | <a href="#">NM_006814</a>    | Proteasome (prosome, macropain) inhibitor subunit 1 (PI31)    | N/A     | 0.47 |   |
| <b>PTBP2</b>    | <a href="#">NM_021190</a>    | Polypyrimidine tract binding protein 2                        | -0.14   | 0.42 |   |
| <b>PTPN9</b>    | <a href="#">NM_002833</a>    | Protein tyrosine phosphatase, non-receptor type 9             | -0.2    | 0.65 |   |
| <b>PTPRB</b>    | <a href="#">NM_001109754</a> | Protein tyrosine phosphatase, receptor type, B                | > -0.03 | 0.27 |   |
| <b>PTPRE</b>    | <a href="#">NM_006504</a>    | Protein tyrosine phosphatase, receptor type, E                | -0.11   | 0.76 |   |
| <b>PURB</b>     | <a href="#">NM_033224</a>    | Purine-rich element binding protein B                         | > -0.04 | 0.23 |   |

|                  |                              |                                                                   |         |      |  |
|------------------|------------------------------|-------------------------------------------------------------------|---------|------|--|
| <b>QSER1</b>     | <a href="#">NM_001076786</a> | Glutamine and serine rich 1                                       | > -0.03 | 0.51 |  |
| <b>RAB11FIP2</b> | <a href="#">NM_014904</a>    | RAB11 family interacting protein 2 (class I)                      | > -0.03 | 0.39 |  |
| <b>RAB3GAP2</b>  | <a href="#">NM_012414</a>    | RAB3 gtpase activating protein subunit 2 (non-catalytic)          | > -0.01 | 0.5  |  |
| <b>RAB8B</b>     | <a href="#">NM_016530</a>    | RAB8B, member RAS oncogene family                                 | > -0.03 | 0.58 |  |
| <b>RAD23B</b>    | <a href="#">NM_002874</a>    | RAD23 homolog B (S. Cerevisiae)                                   | -0.07   | 0.75 |  |
| <b>RAI1</b>      | <a href="#">NM_030665</a>    | Retinoic acid induced 1                                           | -0.04   | 0.41 |  |
| <b>RALBP1</b>    | <a href="#">NM_006788</a>    | Rala binding protein 1                                            | > -0.01 | 0.46 |  |
| <b>RALGAPA2</b>  | <a href="#">NM_020343</a>    | Ral gtpase activating protein, alpha subunit 2 (catalytic)        | -0.11   | 0.79 |  |
| <b>RALGAPB</b>   | <a href="#">NM_020336</a>    | Ral gtpase activating protein, beta subunit (non-catalytic)       | -0.32   | 0.73 |  |
| <b>RANBP3</b>    | <a href="#">NM_003624</a>    | RAN binding protein 3                                             | > -0.02 | 0.66 |  |
| <b>RAP1B</b>     | <a href="#">NM_001010942</a> | RAP1B, member of RAS oncogene family                              | -0.17   | 0.73 |  |
| <b>RASAL2</b>    | <a href="#">NM_004841</a>    | RAS protein activator like 2                                      | > -0.02 | 0.32 |  |
| <b>RASL10B</b>   | <a href="#">NM_033315</a>    | RAS-like, family 10, member B                                     | > -0.01 | 0.4  |  |
| <b>RBM47</b>     | <a href="#">NM_001098634</a> | RNA binding motif protein 47                                      | > -0.04 | 0.7  |  |
| <b>RCOR1</b>     | <a href="#">NM_015156</a>    | REST corepressor 1                                                | -0.1    | 0.93 |  |
| <b>RECK</b>      | <a href="#">NM_021111</a>    | Reversion-inducing-cysteine-rich protein with kazal motifs        | -0.15   | 0.6  |  |
| <b>RGMA</b>      | <a href="#">NM_001166283</a> | RGM domain family, member A                                       | > -0.02 | 0.67 |  |
| <b>RIMKLA</b>    | <a href="#">NM_173642</a>    | Ribosomal modification protein rimk-like family member A          | > -0.06 | 0.32 |  |
| <b>RLIM</b>      | <a href="#">NM_016120</a>    | Ring finger protein, LIM domain interacting                       | > -0.05 | 0.75 |  |
| <b>RMND5A</b>    | <a href="#">NM_022780</a>    | Required for meiotic nuclear division 5 homolog A (S. Cerevisiae) | > -0.02 | 0.4  |  |
| <b>RNF125</b>    | <a href="#">NM_017831</a>    | Ring finger protein 125                                           | -0.2    | 0.41 |  |
| <b>RNF144B</b>   | <a href="#">NM_182757</a>    | Ring finger protein 144B                                          | -0.22   | <0.1 |  |
| <b>RNF145</b>    | <a href="#">NM_001199380</a> | Ring finger protein 145                                           | -0.21   | 0.59 |  |
| <b>RNF169</b>    | <a href="#">NM_001098638</a> | Ring finger protein 169                                           | > -0.09 | 0.65 |  |

|                 |                              |                                                                                                                  |         |      |  |
|-----------------|------------------------------|------------------------------------------------------------------------------------------------------------------|---------|------|--|
| <b>RNF34</b>    | <a href="#">NM_025126</a>    | Ring finger protein 34                                                                                           | -0.28   | 0.46 |  |
| <b>RNMT</b>     | <a href="#">NM_003799</a>    | RNA (guanine-7-) methyltransferase                                                                               | -0.2    | 0.69 |  |
| <b>ROBO2</b>    | <a href="#">NM_001128929</a> | Roundabout, axon guidance receptor, homolog 2 (Drosophila)                                                       | -0.06   | 0.77 |  |
| <b>ROD1</b>     | <a href="#">NM_001163788</a> | ROD1 regulator of differentiation 1 (S. Pombe)                                                                   | > -0.08 | 0.56 |  |
| <b>RORA</b>     | <a href="#">NM_002943</a>    | RAR-related orphan receptor A                                                                                    | -0.26   | 0.99 |  |
| <b>RORB</b>     | <a href="#">NM_006914</a>    | RAR-related orphan receptor B                                                                                    | -0.08   | 0.39 |  |
| <b>RPS6KA3</b>  | <a href="#">NM_004586</a>    | Ribosomal protein S6 kinase, 90kda, polypeptide 3                                                                | -0.19   | 0.76 |  |
| <b>RPS6KA6</b>  | <a href="#">NM_014496</a>    | Ribosomal protein S6 kinase, 90kda, polypeptide 6                                                                | > -0.04 | 0.68 |  |
| <b>RPS6KB1</b>  | <a href="#">NM_003161</a>    | Ribosomal protein S6 kinase, 70kda, polypeptide 1                                                                | -0.35   | <0.1 |  |
| <b>RRP15</b>    | <a href="#">NM_016052</a>    | Ribosomal RNA processing 15 homolog (S. Cerevisiae)                                                              | -0.26   | 0.3  |  |
| <b>RSPO2</b>    | <a href="#">NM_178565</a>    | R-spondin 2                                                                                                      | -0.18   | 0.48 |  |
| <b>RTKN2</b>    | <a href="#">NM_145307</a>    | Rhotekin 2                                                                                                       | -0.07   | <0.1 |  |
| <b>RYR3</b>     | <a href="#">NM_001036</a>    | Ryanodine receptor 3                                                                                             | -0.12   | 0.48 |  |
| <b>S1PR1</b>    | <a href="#">NM_001400</a>    | Sphingosine-1-phosphate receptor 1                                                                               | -0.4    | 0.65 |  |
| <b>SAMD4A</b>   | <a href="#">NM_001161576</a> | Sterile alpha motif domain containing 4A                                                                         | -0.04   | 0.78 |  |
| <b>SASH1</b>    | <a href="#">NM_015278</a>    | SAM and SH3 domain containing 1                                                                                  | > -0.02 | 0.46 |  |
| <b>SBNO1</b>    | <a href="#">NM_001167856</a> | Strawberry notch homolog 1 (Drosophila)                                                                          | > -0.07 | 0.61 |  |
| <b>SCD</b>      | <a href="#">NM_005063</a>    | Stearoyl-coa desaturase (delta-9-desaturase)                                                                     | -0.28   | 0.8  |  |
| <b>SCHIP1</b>   | <a href="#">NM_001197107</a> | Schwannomin interacting protein 1                                                                                | -0.14   | 0.55 |  |
| <b>SCN9A</b>    | <a href="#">NM_002977</a>    | Sodium channel, voltage-gated, type IX, alpha subunit                                                            | -0.19   | 0.31 |  |
| <b>SEC24C</b>   | <a href="#">NM_004922</a>    | SEC24 family, member C (S. Cerevisiae)                                                                           | -0.21   | 0.56 |  |
| <b>SECISBP2</b> | <a href="#">NM_024077</a>    | SECIS binding protein 2                                                                                          | -0.12   | 0.49 |  |
| <b>SEL1L</b>    | <a href="#">NM_005065</a>    | Sel-1 suppressor of lin-12-like (C. Elegans)                                                                     | -0.08   | 0.75 |  |
| <b>SEMA3C</b>   | <a href="#">NM_006379</a>    | Sema domain, immunoglobulin domain (Ig), short basic domain, secreted, (semaphorin) 3C                           | -0.29   | 0.62 |  |
| <b>SEMA4F</b>   | <a href="#">NM_004263</a>    | Sema domain, immunoglobulin domain (Ig), transmembrane domain (TM) and short cytoplasmic domain, (semaphorin) 4F | > -0.02 | 0.56 |  |

|                 |                              |                                                                                             |         |      |   |
|-----------------|------------------------------|---------------------------------------------------------------------------------------------|---------|------|---|
| <b>SEPT3</b>    | <a href="#">NM_019106</a>    | Septin 3                                                                                    | -0.07   | 0.7  |   |
| <b>SERTAD2</b>  | <a href="#">NM_014755</a>    | SERTA domain containing 2                                                                   | > -0.05 | 0.71 |   |
| <b>SETX</b>     | <a href="#">NM_015046</a>    | Senataxin                                                                                   | -0.11   | 0.43 |   |
| <b>SH2B3</b>    | <a href="#">NM_005475</a>    | SH2B adaptor protein 3                                                                      | -0.23   | 0.63 | √ |
| <b>SH3GLB1</b>  | <a href="#">NM_001206651</a> | SH3-domain GRB2-like endophilin B1                                                          | > -0.01 | 0.26 |   |
| <b>SHE</b>      | <a href="#">NM_001010846</a> | Src homology 2 domain containing E                                                          | > -0.04 | 0.38 |   |
| <b>SIN3B</b>    | <a href="#">NM_015260</a>    | SIN3 homolog B, transcription regulator (yeast)                                             | -0.28   | 0.73 |   |
| <b>SIX2</b>     | <a href="#">NM_016932</a>    | SIX homeobox 2                                                                              | -0.08   | 0.78 |   |
| <b>SIX4</b>     | <a href="#">NM_017420</a>    | SIX homeobox 4                                                                              | -0.07   | 0.61 |   |
| <b>SLA</b>      | <a href="#">NM_001045556</a> | Src-like-adaptor                                                                            | -0.22   | 0.29 |   |
| <b>SLAIN2</b>   | <a href="#">NM_020846</a>    | SLAIN motif family, member 2                                                                | > -0.07 | 0.96 |   |
| <b>SLC19A2</b>  | <a href="#">NM_006996</a>    | Solute carrier family 19 (thiamine transporter), member 2                                   | -0.29   | 0.66 |   |
| <b>SLC25A25</b> | <a href="#">NM_001006641</a> | Solute carrier family 25 (mitochondrial carrier; phosphate carrier), member 25              | -0.09   | 0.79 |   |
| <b>SLC25A36</b> | <a href="#">NM_001104647</a> | Solute carrier family 25, member 36                                                         | > -0.03 | 0.23 |   |
| <b>SLC25A37</b> | <a href="#">NM_016612</a>    | Solute carrier family 25, member 37                                                         | -0.36   | 0.66 |   |
| <b>SLC25A4</b>  | <a href="#">NM_001151</a>    | Solute carrier family 25 (mitochondrial carrier; adenine nucleotide translocator), member 4 | -0.16   | 0.5  |   |
| <b>SLC26A4</b>  | <a href="#">NM_000441</a>    | Solute carrier family 26, member 4                                                          | -0.22   | 0.51 |   |
| <b>SLC35F1</b>  | <a href="#">NM_001029858</a> | Solute carrier family 35, member F1                                                         | > -0.02 | 0.5  |   |
| <b>SLC38A2</b>  | <a href="#">NM_018976</a>    | Solute carrier family 38, member 2                                                          | -0.1    | 0.69 |   |
| <b>SLC6A2</b>   | <a href="#">NM_001172504</a> | Solute carrier family 6 (neurotransmitter transporter, noradrenalin), member 2              | -0.07   | 0.65 |   |
| <b>SLC7A1</b>   | <a href="#">NM_003045</a>    | Solute carrier family 7 (cationic amino acid transporter, y+ system), member 1              | > -0.02 | 0.48 |   |
| <b>SLC7A2</b>   | <a href="#">NM_001008539</a> | Solute carrier family 7 (cationic amino acid transporter, y+ system), member 2              | -0.33   | <0.1 |   |

|                |                              |                                                                      |         |      |   |
|----------------|------------------------------|----------------------------------------------------------------------|---------|------|---|
| <b>SLC9A6</b>  | <a href="#">NM_001042537</a> | Solute carrier family 9 (sodium/hydrogen exchanger), member 6        | -0.1    | 0.52 |   |
| <b>SLC9A8</b>  | <a href="#">NM_015266</a>    | Solute carrier family 9 (sodium/hydrogen exchanger), member 8        | > -0.02 | 0.63 |   |
| <b>SLITRK1</b> | <a href="#">NM_052910</a>    | SLIT and NTRK-like family, member 1                                  | -0.2    | 0.81 |   |
| <b>SLITRK4</b> | <a href="#">NM_001184749</a> | SLIT and NTRK-like family, member 4                                  | > -0.04 | 0.4  |   |
| <b>SMAD2</b>   | <a href="#">NM_001003652</a> | SMAD family member 2                                                 | -0.04   | 0.58 |   |
| <b>SP1</b>     | <a href="#">NM_003109</a>    | Sp1 transcription factor                                             | > -0.03 | 0.4  |   |
| <b>SPIRE1</b>  | <a href="#">NM_001128626</a> | Spire homolog 1 (Drosophila)                                         | -0.12   | 0.66 |   |
| <b>SPTY2D1</b> | <a href="#">NM_194285</a>    | SPT2, Suppressor of Ty, domain containing 1 ( <i>S. Cerevisiae</i> ) | -0.07   | 0.63 |   |
| <b>SRCIN1</b>  | <a href="#">NM_025248</a>    | SRC kinase signaling inhibitor 1                                     | > -0.02 | 0.33 |   |
| <b>SRPK2</b>   | <a href="#">NM_182691</a>    | SRSF protein kinase 2                                                | -0.28   | 0.65 |   |
| <b>SRSF5</b>   | <a href="#">NM_001039465</a> | Serine/arginine-rich splicing factor 5                               | -0.12   | 0.38 |   |
| <b>SRSF7</b>   | <a href="#">NM_001031684</a> | Serine/arginine-rich splicing factor 7                               | -0.27   | 0.66 |   |
| <b>SS18L1</b>  | <a href="#">NM_198935</a>    | Synovial sarcoma translocation gene on chromosome 18-like 1          | -0.12   | 0.93 | √ |
| <b>ST8SIA4</b> | <a href="#">NM_005668</a>    | ST8 alpha-N-acetyl-neuraminide alpha-2,8-sialyltransferase 4         | -0.33   | 0.81 |   |
| <b>STAU1</b>   | <a href="#">NM_001037328</a> | Staufen, RNA binding protein, homolog 1 (Drosophila)                 | -0.06   | 0.26 |   |
| <b>STC1</b>    | <a href="#">NM_003155</a>    | Stanniocalcin 1                                                      | -0.11   | 0.37 |   |
| <b>STC2</b>    | <a href="#">NM_003714</a>    | Stanniocalcin 2                                                      | -0.17   | 0.43 |   |
| <b>STRN</b>    | <a href="#">NM_003162</a>    | Striatin, calmodulin binding protein                                 | > -0.05 | 0.88 |   |
| <b>SUDS3</b>   | <a href="#">NM_022491</a>    | Suppressor of defective silencing 3 homolog ( <i>S. Cerevisiae</i> ) | -0.17   | 0.53 |   |
| <b>SYT3</b>    | <a href="#">NM_001160328</a> | Synaptotagmin III                                                    | > -0.02 | 0.47 |   |

|                 |                              |                                                                                                    |         |      |   |
|-----------------|------------------------------|----------------------------------------------------------------------------------------------------|---------|------|---|
| <b>TAB3</b>     | <a href="#">NM_152787</a>    | TGF-beta activated kinase 1/MAP3K7 binding protein 3                                               | -0.06   | 0.63 |   |
| <b>TADA2B</b>   | <a href="#">NM_152293</a>    | Transcriptional adaptor 2B                                                                         | -0.29   | 0.84 |   |
| <b>TANC2</b>    | <a href="#">NM_025185</a>    | Tetratricopeptide repeat, ankyrin repeat and coiled-coil containing 2                              | -0.07   | 0.74 |   |
| <b>TAOK1</b>    | <a href="#">NM_020791</a>    | TAO kinase 1                                                                                       | > -0.03 | 0.7  |   |
| <b>TARDBP</b>   | <a href="#">NM_007375</a>    | TAR DNA binding protein                                                                            | -0.04   | 0.54 |   |
| <b>TBC1D1</b>   | <a href="#">NM_015173</a>    | TBC1 (tre-2/USP6, BUB2, cdc16) domain family, member 1                                             | -0.32   | 0.67 |   |
| <b>TBC1D14</b>  | <a href="#">NM_001113361</a> | TBC1 domain family, member 14                                                                      | -0.03   | 0.65 |   |
| <b>TBC1D2B</b>  | <a href="#">NM_015079</a>    | TBC1 domain family, member 2B                                                                      | -0.02   | 0.5  |   |
| <b>TBC1D4</b>   | <a href="#">NM_014832</a>    | TBC1 domain family, member 4                                                                       | -0.25   | 0.59 |   |
| <b>TBL1X</b>    | <a href="#">NM_001139466</a> | Transducin (beta)-like 1X-linked                                                                   | -0.1    | 0.77 |   |
| <b>TCERG1</b>   | <a href="#">NM_001040006</a> | Transcription elongation regulator 1                                                               | -0.38   | 0.63 |   |
| <b>TCF7L2</b>   | <a href="#">NM_001146274</a> | Transcription factor 7-like 2 (T-cell specific, HMG-box)                                           | -0.17   | 0.64 | √ |
| <b>TGFBR3</b>   | <a href="#">NM_001195683</a> | Transforming growth factor, beta receptor III                                                      | > -0.03 | 0.65 |   |
| <b>THRB</b>     | <a href="#">NM_000461</a>    | Thyroid hormone receptor, beta (erythroblastic leukemia viral (v-erb-a) oncogene homolog 2, avian) | -0.06   | 0.66 |   |
| <b>TLK2</b>     | <a href="#">NM_001112707</a> | Tousled-like kinase 2                                                                              | > -0.03 | 0.31 |   |
| <b>TLL1</b>     | <a href="#">NM_012464</a>    | Tolloid-like 1                                                                                     | -0.07   | 0.63 |   |
| <b>TM9SF4</b>   | <a href="#">NM_014742</a>    | Transmembrane 9 superfamily protein member 4                                                       | -0.05   | 0.53 |   |
| <b>TMED5</b>    | <a href="#">NM_001167830</a> | Transmembrane emp24 protein transport domain containing 5                                          | > -0.02 | 0.47 |   |
| <b>TMEM127</b>  | <a href="#">NM_001193304</a> | Transmembrane protein 127                                                                          | > -0.03 | 0.48 |   |
| <b>TMEM132B</b> | <a href="#">NM_052907</a>    | Transmembrane protein 132B                                                                         | -0.1    | 0.7  |   |
| <b>TMEM132D</b> | <a href="#">NM_133448</a>    | Transmembrane protein 132D                                                                         | -0.16   | 0.74 |   |



|                  |                              |                                                                    |         |      |  |
|------------------|------------------------------|--------------------------------------------------------------------|---------|------|--|
| <b>TMEM135</b>   | <a href="#">NM_001168724</a> | Transmembrane protein 135                                          | > -0.05 | 0.41 |  |
| <b>TMEM151B</b>  | <a href="#">NM_001137560</a> | Transmembrane protein 151B                                         | -0.07   | 0.75 |  |
| <b>TMEM165</b>   | <a href="#">NM_018475</a>    | Transmembrane protein 165                                          | -0.33   | 0.39 |  |
| <b>TMEM47</b>    | <a href="#">NM_031442</a>    | Transmembrane protein 47                                           | -0.09   | 0.11 |  |
| <b>TMEM64</b>    | <a href="#">NM_001008495</a> | Transmembrane protein 64                                           | -0.2    | 0.57 |  |
| <b>TNF</b>       | <a href="#">NM_000594</a>    | Tumor necrosis factor                                              | -0.28   | 0.29 |  |
| <b>TNFAIP1</b>   | <a href="#">NM_021137</a>    | Tumor necrosis factor, alpha-induced protein 1 (endothelial)       | -0.12   | 0.37 |  |
| <b>TNFRSF11B</b> | <a href="#">NM_002546</a>    | Tumor necrosis factor receptor superfamily, member 11b             | -0.3    | 0.68 |  |
| <b>TNP1</b>      | <a href="#">NM_003284</a>    | Transition protein 1 (during histone to protamine replacement)     | -0.09   | 0.32 |  |
| <b>TNPO1</b>     | <a href="#">NM_002270</a>    | Transportin 1                                                      | -0.29   | 0.98 |  |
| <b>TNRC6B</b>    | <a href="#">NM_001024843</a> | Trinucleotide repeat containing 6B                                 | > -0.09 | 0.85 |  |
| <b>TNS1</b>      | <a href="#">NM_022648</a>    | Tensin 1                                                           | -0.24   | 0.7  |  |
| <b>TOM1L1</b>    | <a href="#">NM_005486</a>    | Target of myb1 (chicken)-like 1                                    | -0.44   | 0.77 |  |
| <b>TOR1AIP2</b>  | <a href="#">NM_022347</a>    | Torsin A interacting protein 2                                     | > -0.01 | 0.31 |  |
| <b>TRANK1</b>    | <a href="#">NM_014831</a>    | Tetratricopeptide repeat and ankyrin repeat containing 1           | > -0.01 | 0.35 |  |
| <b>TRIM3</b>     | <a href="#">NM_006458</a>    | Tripartite motif containing 3                                      | > -0.02 | 0.66 |  |
| <b>TRIM71</b>    | <a href="#">NM_001039111</a> | Tripartite motif containing 71                                     | -0.26   | 0.7  |  |
| <b>TRNP1</b>     | <a href="#">NM_001013642</a> | TMF1-regulated nuclear protein 1                                   | -0.19   | 0.5  |  |
| <b>TRPM7</b>     | <a href="#">NM_017672</a>    | Transient receptor potential cation channel, subfamily M, member 7 | > -0.01 | 0.54 |  |
| <b>TSC22D2</b>   | <a href="#">NM_014779</a>    | TSC22 domain family, member 2                                      | -0.18   | 0.27 |  |
| <b>TTC39A</b>    | <a href="#">NM_001080494</a> | Tetratricopeptide repeat domain 39A                                | -0.05   | 0.36 |  |
| <b>TTC39B</b>    | <a href="#">NM_001168339</a> | Tetratricopeptide repeat domain 39B                                | -0.2    | 0.54 |  |

|                |                              |                                                          |         |       |   |
|----------------|------------------------------|----------------------------------------------------------|---------|-------|---|
| <b>TULP4</b>   | <a href="#">NM_001007466</a> | Tubby like protein 4                                     | > -0.03 | 0.27  |   |
| <b>TXK</b>     | <a href="#">NM_003328</a>    | TXK tyrosine kinase                                      | -0.12   | 0.45  |   |
| <b>TXNDC12</b> | <a href="#">NM_015913</a>    | Thioredoxin domain containing 12 (endoplasmic reticulum) | -0.24   | 0.44  |   |
| <b>UBE2B</b>   | <a href="#">NM_003337</a>    | Ubiquitin-conjugating enzyme E2B                         | -0.16   | 0.35  |   |
| <b>UBE2J1</b>  | <a href="#">NM_016021</a>    | Ubiquitin-conjugating enzyme E2, J1, U                   | -0.09   | 0.53  |   |
| <b>UBL3</b>    | <a href="#">NM_007106</a>    | Ubiquitin-like 3                                         | > -0.03 | < 0.1 |   |
| <b>UBN2</b>    | <a href="#">NM_173569</a>    | Ubinuclein 2                                             | -0.13   | 0.89  |   |
| <b>UNKL</b>    | <a href="#">NM_001193388</a> | Unkempt homolog (Drosophila)-like                        | > -0.01 | 0.52  |   |
| <b>USP42</b>   | <a href="#">NM_032172</a>    | Ubiquitin specific peptidase 42                          | -0.24   | 0.57  |   |
| <b>USP47</b>   | <a href="#">NM_017944</a>    | Ubiquitin specific peptidase 47                          | -0.2    | 0.48  |   |
| <b>USP6NL</b>  | <a href="#">NM_001080491</a> | USP6 N-terminal like                                     | -0.08   | 0.55  |   |
| <b>USP8</b>    | <a href="#">NM_001128610</a> | Ubiquitin specific peptidase 8                           | -0.06   | 0.6   |   |
| <b>USP9X</b>   | <a href="#">NM_001039590</a> | Ubiquitin specific peptidase 9, X-linked                 | > -0.02 | 0.43  |   |
| <b>VANGL1</b>  | <a href="#">NM_001172411</a> | Vang-like 1 (van gogh, Drosophila)                       | > -0.06 | 0.57  |   |
| <b>VGLL4</b>   | <a href="#">NM_001128219</a> | Vestigial like 4 (Drosophila)                            | > -0.01 | 0.54  |   |
| <b>WDFY3</b>   | <a href="#">NM_014991</a>    | WD repeat and FYVE domain containing 3                   | -0.14   | 0.46  |   |
| <b>WDR37</b>   | <a href="#">NM_014023</a>    | WD repeat domain 37                                      | > -0.02 | 0.8   |   |
| <b>WHSC1</b>   | <a href="#">NM_133334</a>    | Wolf-Hirschhorn syndrome candidate 1                     | > -0.03 | 0.37  | √ |
| <b>WSB2</b>    | <a href="#">NM_018639</a>    | WD repeat and SOCS box containing 2                      | -0.06   | 0.28  |   |
| <b>XIAP</b>    | <a href="#">NM_001167</a>    | X-linked inhibitor of apoptosis                          | -0.14   | 0.79  |   |
| <b>XPO7</b>    | <a href="#">NM_015024</a>    | Exportin 7                                               | -0.14   | 0.11  |   |
| <b>XYLT1</b>   | <a href="#">NM_022166</a>    | Xylosyltransferase I                                     | > -0.03 | 0.81  |   |
| <b>YIPF6</b>   | <a href="#">NM_001195214</a> | Yip1 domain family, member 6                             | > -0.02 | 0.59  |   |

|                |                              |                                                                                           |         |      |  |
|----------------|------------------------------|-------------------------------------------------------------------------------------------|---------|------|--|
| <b>YOD1</b>    | <a href="#">NM_018566</a>    | YOD1 OTU deubiquinating enzyme 1 homolog ( <i>S. Cerevisiae</i> )                         | -0.09   | 0.5  |  |
| <b>YTHDC1</b>  | <a href="#">NM_001031732</a> | YTH domain containing 1                                                                   | -0.15   | 0.63 |  |
| <b>YTHDF2</b>  | <a href="#">NM_001172828</a> | YTH domain family, member 2                                                               | -0.09   | 0.44 |  |
| <b>YTHDF3</b>  | <a href="#">NM_152758</a>    | YTH domain family, member 3                                                               | > -0.04 | 0.37 |  |
| <b>YWHAG</b>   | <a href="#">NM_012479</a>    | Tyrosine 3-monooxygenase/tryptophan 5-monooxygenase activation protein, gamma polypeptide | -0.14   | 0.55 |  |
| <b>YWHAZ</b>   | <a href="#">NM_001135699</a> | Tyrosine 3-monooxygenase/tryptophan 5-monooxygenase activation protein, zeta polypeptide  | -0.05   | 0.29 |  |
| <b>YY1</b>     | <a href="#">NM_003403</a>    | YY1 transcription factor                                                                  | -0.07   | 0.33 |  |
| <b>ZADH2</b>   | <a href="#">NM_175907</a>    | Zinc binding alcohol dehydrogenase domain containing 2                                    | > -0.05 | 0.89 |  |
| <b>ZBTB33</b>  | <a href="#">NM_001184742</a> | Zinc finger and BTB domain containing 33                                                  | -0.1    | 0.33 |  |
| <b>ZBTB4</b>   | <a href="#">NM_001128833</a> | Zinc finger and BTB domain containing 4                                                   | -0.08   | 0.86 |  |
| <b>ZBTB41</b>  | <a href="#">NM_194314</a>    | Zinc finger and BTB domain containing 41                                                  | > -0.03 | 0.63 |  |
| <b>ZBTB43</b>  | <a href="#">NM_001135776</a> | Zinc finger and BTB domain containing 43                                                  | -0.23   | 0.67 |  |
| <b>ZCCHC14</b> | <a href="#">NM_015144</a>    | Zinc finger, CCHC domain containing 14                                                    | > -0.02 | 0.59 |  |
| <b>ZEB2</b>    | <a href="#">NM_001171653</a> | Zinc finger E-box binding homeobox 2                                                      | > -0.06 | 0.62 |  |
| <b>ZFAND6</b>  | <a href="#">NM_001242911</a> | Zinc finger, AN1-type domain 6                                                            | -0.23   | 0.54 |  |
| <b>ZFP30</b>   | <a href="#">NM_014898</a>    | Zinc finger protein 30 homolog (mouse)                                                    | -0.1    | 0.49 |  |
| <b>ZFP36L1</b> | <a href="#">NM_004926</a>    | Zinc finger protein 36, C3H type-like 1                                                   | -0.33   | 0.57 |  |
| <b>ZFP62</b>   | <a href="#">NM_001172638</a> | Zinc finger protein 62 homolog (mouse)                                                    | -0.33   | 0.16 |  |
| <b>ZFP82</b>   | <a href="#">NM_133466</a>    | Zinc finger protein 82 homolog (mouse)                                                    | -0.33   | 0.76 |  |
| <b>ZIC3</b>    | <a href="#">NM_003413</a>    | Zic family member 3                                                                       | -0.26   | 0.6  |  |
| <b>ZMYND11</b> | <a href="#">NM_001202464</a> | Zinc finger, MYND-type containing 11                                                      | -0.18   | 0.51 |  |

|                |                     |                          |         |       |  |
|----------------|---------------------|--------------------------|---------|-------|--|
| <b>ZNF200</b>  | <u>NM_001145446</u> | Zinc finger protein 200  | -0.1    | 0.67  |  |
| <b>ZNF236</b>  | <u>NM_007345</u>    | Zinc finger protein 236  | > -0.02 | 0.65  |  |
| <b>ZNF280B</b> | <u>NM_080764</u>    | Zinc finger protein 280B | > -0.03 | 0.19  |  |
| <b>ZNF286A</b> | <u>NM_001130842</u> | Zinc finger protein 286A | N/A     | 0.59  |  |
| <b>ZNF292</b>  | <u>NM_015021</u>    | Zinc finger protein 292  | > -0.02 | 0.75  |  |
| <b>ZNF295</b>  | <u>NM_001098402</u> | Zinc finger protein 295  | > -0.01 | 0.29  |  |
| <b>ZNF33B</b>  | <u>NM_006955</u>    | Zinc finger protein 33B  | -0.19   | 0.3   |  |
| <b>ZNF345</b>  | <u>NM_001242472</u> | Zinc finger protein 345  | -0.16   | 0.32  |  |
| <b>ZNF470</b>  | <u>NM_001001668</u> | Zinc finger protein 470  | > -0.08 | < 0.1 |  |
| <b>ZNF562</b>  | <u>NM_001130031</u> | Zinc finger protein 562  | -0.25   | 0.48  |  |
| <b>ZNF563</b>  | <u>NM_145276</u>    | Zinc finger protein 563  | -0.41   | <0.1  |  |
| <b>ZNF568</b>  | <u>NM_001204838</u> | Zinc finger protein 568  | -0.4    | <0.1  |  |
| <b>ZNF571</b>  | <u>NM_016536</u>    | Zinc finger protein 571  | -0.28   | 0.59  |  |
| <b>ZNF618</b>  | <u>NM_133374</u>    | Zinc finger protein 618  | > -0.05 | 0.93  |  |
| <b>ZNF654</b>  | <u>NM_018293</u>    | Zinc finger protein 654  | -0.16   | 0.5   |  |
| <b>ZNF699</b>  | <u>NM_198535</u>    | Zinc finger protein 699  | -0.29   | <0.1  |  |
| <b>ZNF704</b>  | <u>NM_001033723</u> | Zinc finger protein 704  | -0.19   | 0.91  |  |
| <b>ZNF780A</b> | <u>NM_001010880</u> | Zinc finger protein 780A | -0.65   | <0.1  |  |
| <b>ZNF81</b>   | <u>NM_007137</u>    | Zinc finger protein 81   | > -0.02 | 0.36  |  |

**Supplementary Table 10. Predicted targets of hsa-miR-181a by PicTar.**

| <b>Gene symbol</b> | <b>Gene name</b>                                                                                                            | <b>Refseq Id</b>          | <b>PicTar score</b> | <b>Cancer gene</b> |
|--------------------|-----------------------------------------------------------------------------------------------------------------------------|---------------------------|---------------------|--------------------|
| ACSL1              | Acyl-CoA synthetase long-chain family member 1                                                                              | <a href="#">NM_001995</a> | 2.87                |                    |
| ACTL6A             | Actin-like 6A, transcript variant 2                                                                                         | <a href="#">NM_177989</a> | 4.56                |                    |
| ACTL6A             | Actin-like 6A, transcript variant 3                                                                                         | <a href="#">NM_178042</a> | 4.56                |                    |
| ACTL6A             | Actin-like 6A, transcript variant 1                                                                                         | <a href="#">NM_004301</a> | 4.56                |                    |
| ACVR2              | Activin A receptor, type II                                                                                                 | <a href="#">NM_001616</a> | 2.4                 |                    |
| ADAM11             | A disintegrin and metalloproteinase domain 11, transcript variant 1                                                         | <a href="#">NM_002390</a> | 8.37                |                    |
| ADAM11             | A disintegrin and metalloproteinase domain 11, transcript variant 2                                                         | <a href="#">NM_021612</a> | 7.62                |                    |
| ADAMTS1            | A disintegrin-like and metalloprotease (reprolysin type) with thrombospondin type 1 motif, 1                                | <a href="#">NM_006988</a> | 2.53                |                    |
| ADAMTS18           | A disintegrin-like and metalloprotease (reprolysin type) with thrombospondin type 1 motif, 18, transcript variant 1         | <a href="#">NM_199355</a> | 2.39                |                    |
| ADAMTS6            | Similar to ADAMTS-10 precursor (A disintegrin and metalloproteinase with thrombospondin motifs 10) (ADAM-TS 10) (ADAM-TS10) | <a href="#">NM_197941</a> | 3.53                |                    |
| ADARB1             | Adenosine deaminase, RNA-specific, B1 (RED1 homolog rat), transcript variant DRADA2c                                        | <a href="#">NM_015834</a> | 4.15                |                    |
| ADARB1             | Adenosine deaminase, RNA-specific, B1 (RED1 homolog rat), transcript variant DRABA2b                                        | <a href="#">NM_015833</a> | 3.01                |                    |
| ADCY1              | Adenylate cyclase 1 (brain)                                                                                                 | <a href="#">NM_021116</a> | 2.17                |                    |
| ADCY9              | Adenylate cyclase 9                                                                                                         | <a href="#">NM_001116</a> | 2.52                |                    |
| ADM                | Adrenomedullin                                                                                                              | <a href="#">NM_001124</a> | 2.73                |                    |
| AGPAT1             | 1-Acylglycerol-3-phosphate <i>O</i> -acyltransferase 1 (lysophosphatidic acid acyltransferase, a), transcript variant 1     | <a href="#">NM_006411</a> | 3.51                |                    |
| AGPAT1             | 1-Acylglycerol-3-phosphate <i>O</i> -acyltransferase 1 (lysophosphatidic acid acyltransferase, a), transcript variant 2     | <a href="#">NM_032741</a> | 3.51                |                    |
| AKAP7              | A kinase (PRKA) anchor protein 7, transcript variant b                                                                      | <a href="#">NM_138633</a> | 6.12                |                    |
| AKAP7              | A kinase (PRKA) anchor protein 7, transcript variant a                                                                      | <a href="#">NM_004842</a> | 6.12                |                    |
| AKAP7              | A kinase (PRKA) anchor protein 7, transcript variant g                                                                      | <a href="#">NM_016377</a> | 6.12                |                    |
| AKT3               | V-Akt murine thymoma viral oncogene homolog 3 (protein kinase B, g), transcript variant 1                                   | <a href="#">NM_005465</a> | 1.45                |                    |
| ALS2               | Amyotrophic lateral sclerosis 2 (juvenile)                                                                                  | <a href="#">NM_020919</a> | 2.91                |                    |
| ALS2CR3            | Amyotrophic lateral sclerosis 2 (juvenile) chromosome region, candidate 3                                                   | <a href="#">NM_015049</a> | 5.57                |                    |

|         |                                                                                                |                              |      |   |
|---------|------------------------------------------------------------------------------------------------|------------------------------|------|---|
| ANGPT2  | Angiotensinogen 2                                                                              | <a href="#">NM_001147</a>    | 3.8  |   |
| ANKRD15 | Ankyrin repeat domain 15, transcript variant 1                                                 | <a href="#">NM_015158</a>    | 2.23 |   |
| ANKRD15 | Ankyrin repeat domain 15, transcript variant 2                                                 | <a href="#">NM_153186</a>    | 2.23 |   |
| API5    | Apoptosis inhibitor 5                                                                          | <a href="#">NM_006595</a>    | 1.2  |   |
| ARFGEF2 | ADP-ribosylation factor guanine nucleotide-exchange factor 2 (brefeldin A-inhibited)           | <a href="#">NM_006420</a>    | 5.14 |   |
| ARHGEF7 | Rho guanine nucleotide exchange factor (GEF) 7, transcript variant 2                           | <a href="#">NM_145735</a>    | 5.34 |   |
| ARID3B  | AT rich interactive domain 3B (BRIGHT-like)                                                    | <a href="#">NM_006465</a>    | 3.56 |   |
| ARL5    | ADP-ribosylation factor-like 5, transcript variant 1                                           | <a href="#">NM_012097</a>    | 3.68 |   |
| ARL5    | ADP-ribosylation factor-like 5, transcript variant 2                                           | <a href="#">NM_177985</a>    | 3.68 |   |
| ARL8    | ADP-ribosylation factor-like 8                                                                 | <a href="#">NM_178815</a>    | 4.07 |   |
| ARNT2   | Aryl-hydrocarbon receptor nuclear translocator 2                                               | <a href="#">NM_014862</a>    | 2.31 |   |
| ARSJ    | Arylsulfatase family, member J                                                                 | <a href="#">NM_024590</a>    | 5.63 |   |
| ATP11C  | ATPase, Class VI, type 11C                                                                     | <a href="#">NM_173694</a>    | 3.33 |   |
| ATP1B1  | ATPase, Na <sup>+</sup> /K <sup>+</sup> transporting, beta 1 polypeptide, transcript variant 2 | <a href="#">NM_001001787</a> | 2.46 |   |
| ATP1B1  | ATPase, Na <sup>+</sup> /K <sup>+</sup> transporting, beta 1 polypeptide, transcript variant 1 | <a href="#">NM_001677</a>    | 1.72 |   |
| ATP2A2  | ATPase, Ca <sup>++</sup> transporting, cardiac muscle, slow twitch 2, transcript variant 1     | <a href="#">NM_170665</a>    | 2.15 |   |
| ATP2B2  | ATPase, Ca <sup>++</sup> transporting, plasma membrane 2, transcript variant 1                 | <a href="#">NM_001001331</a> | 5.88 |   |
| ATP2B2  | ATPase, Ca <sup>++</sup> transporting, plasma membrane 2, transcript variant 2                 | <a href="#">NM_001683</a>    | 5.88 |   |
| ATRNL1  | Attractin, transcript variant 1                                                                | <a href="#">NM_139321</a>    | 1.64 |   |
| ATXN1   | Ataxin 1                                                                                       | <a href="#">NM_000332</a>    | 8.37 | √ |
| B4GALT1 | UDP-Gal:betaGlcNAc b1,4- galactosyltransferase, polypeptide 1                                  | <a href="#">NM_001497</a>    | 3.65 |   |
| BAIAP1  | BAI1-associated protein 1                                                                      | <a href="#">NM_004742</a>    | 2.38 |   |
| BAIAP2  | BAI1-associated protein 2, transcript variant 1                                                | <a href="#">NM_017450</a>    | 2.79 |   |
| BAZ2A   | Bromodomain adjacent to zinc finger domain, 2A                                                 | <a href="#">NM_013449</a>    | 1.52 |   |
| BCL2L11 | BCL2-like 11 (apoptosis facilitator), transcript variant 6                                     | <a href="#">NM_006538</a>    | 2.03 |   |
| BCL2L11 | BCL2-like 11 (apoptosis facilitator), transcript variant 1                                     | <a href="#">NM_138621</a>    | 2.03 |   |
| BCL2L11 | BCL2-like 11 (apoptosis facilitator), transcript variant 8                                     | <a href="#">NM_138627</a>    | 2.01 |   |
| BCL2L11 | BCL2-like 11 (apoptosis facilitator), transcript variant 7                                     | <a href="#">NM_138626</a>    | 2.01 |   |
| BCL7A   | B-cell CLL/lymphoma 7A                                                                         | <a href="#">NM_020993</a>    | 1.76 |   |
| BHLHB2  | Basic helix-loop-helix domain containing, class B, 2                                           | <a href="#">NM_003670</a>    | 1.76 |   |

|          |                                                                                              |                              |      |  |
|----------|----------------------------------------------------------------------------------------------|------------------------------|------|--|
| BICD2    | Bicaudal D homolog 2 (Drosophila), transcript variant 2                                      | <a href="#">NM_015250</a>    | 1.38 |  |
| BICD2    | Bicaudal D homolog 2 (Drosophila), transcript variant 1                                      | <a href="#">NM_001003800</a> | 1.2  |  |
| BMPR2    | Bone morphogenetic protein receptor, type II (serine/threonine kinase), transcript variant 1 | <a href="#">NM_001204</a>    | 0.45 |  |
| BMPR2    | Bone morphogenetic protein receptor, type II (serine/threonine kinase), transcript variant 2 | <a href="#">NM_033346</a>    | 0.42 |  |
| BRD1     | Bromodomain containing 1                                                                     | <a href="#">NM_014577</a>    | 1.9  |  |
| BTBD3    | BTB (POZ) domain containing 3, transcript variant 1                                          | <a href="#">NM_014962</a>    | 3.15 |  |
| BTBD3    | BTB (POZ) domain containing 3, transcript variant 2                                          | <a href="#">NM_181443</a>    | 3.15 |  |
| C13orf23 | Chromosome 13 open reading frame 23, transcript variant 1                                    | <a href="#">NM_025138</a>    | 3.79 |  |
| C13orf23 | Chromosome 13 open reading frame 23, transcript variant 2                                    | <a href="#">NM_170719</a>    | 3.79 |  |
| C14orf4  | Chromosome 14 open reading frame 4                                                           | <a href="#">NM_024496</a>    | 4.29 |  |
| C14orf43 | Chromosome 14 open reading frame 43                                                          | <a href="#">NM_194278</a>    | 3.84 |  |
| C17orf39 | Chromosome 17 open reading frame 39                                                          | <a href="#">NM_024052</a>    | 2.84 |  |
| C2orf69  | Chromosome 2 open reading frame 69                                                           | <a href="#">NM_153689</a>    | 3.61 |  |
| C5orf5   | Chromosome 5 open reading frame 5                                                            | <a href="#">NM_016603</a>    | 3.31 |  |
| C6orf62  | Chromosome 6 open reading frame 62                                                           | <a href="#">NM_030939</a>    | 2.54 |  |
| C9orf54  | Chromosome 9 open reading frame 54                                                           | <a href="#">NM_032809</a>    | 4.1  |  |
| CAB39    | Calcium binding protein 39                                                                   | <a href="#">NM_016289</a>    | 1.01 |  |
| CACNA2D2 | Calcium channel, voltage-dependent, a2/d subunit 2, transcript variant 2                     | <a href="#">NM_006030</a>    | 2.34 |  |
| CACNA2D2 | Calcium channel, voltage-dependent, a 2/d subunit 2, transcript variant 1                    | <a href="#">NM_001005505</a> | 2.34 |  |
| CACNB2   | Calcium channel, voltage-dependent, b 2 subunit, transcript variant 1                        | <a href="#">NM_000724</a>    | 1.59 |  |
| CACNB2   | Calcium channel, voltage-dependent, b 2 subunit, transcript variant 3                        | <a href="#">NM_201590</a>    | 1.59 |  |
| CACNB2   | Calcium channel, voltage-dependent, b 2 subunit, transcript variant 8                        | <a href="#">NM_201572</a>    | 1.59 |  |
| CACNB2   | Calcium channel, voltage-dependent, b 2 subunit, transcript variant 4                        | <a href="#">NM_201597</a>    | 1.59 |  |
| CACNB2   | Calcium channel, voltage-dependent, b 2 subunit, transcript variant 5                        | <a href="#">NM_201593</a>    | 1.59 |  |
| CACNB2   | Calcium channel, voltage-dependent, b 2 subunit, transcript variant 6                        | <a href="#">NM_201571</a>    | 1.59 |  |
| CACNB2   | Calcium channel, voltage-dependent, b 2 subunit, transcript variant 2                        | <a href="#">NM_201596</a>    | 1.59 |  |
| CACNB2   | Calcium channel, voltage-dependent, b 2 subunit, transcript variant 7                        | <a href="#">NM_201570</a>    | 1.59 |  |
| CAMK2G   | Calcium/calmodulin-dependent protein kinase (CaM kinase) II g, transcript variant 6          | <a href="#">NM_172173</a>    | 1.81 |  |

|         |                                                                                         |                           |      |   |
|---------|-----------------------------------------------------------------------------------------|---------------------------|------|---|
| CAMK2G  | Calcium/calmodulin-dependent protein kinase (CaM kinase) II g, transcript variant 1     | <a href="#">NM_172171</a> | 1.81 |   |
| CAMK2G  | Calcium/calmodulin-dependent protein kinase (CaM kinase) II g, transcript variant 3     | <a href="#">NM_172170</a> | 1.81 |   |
| CAMK2G  | Calcium/calmodulin-dependent protein kinase (CaM kinase) II g, transcript variant 4     | <a href="#">NM_001222</a> | 1.81 |   |
| CAMK2G  | Calcium/calmodulin-dependent protein kinase (CaM kinase) II g, transcript variant 2     | <a href="#">NM_172169</a> | 1.81 |   |
| CAMK2G  | Calcium/calmodulin-dependent protein kinase (CaM kinase) II g, transcript variant 5     | <a href="#">NM_172172</a> | 1.75 |   |
| CAMSAP1 | Calmodulin regulated spectrin-associated protein 1                                      | <a href="#">NM_015447</a> | 1.7  |   |
| CARD11  | Caspase recruitment domain family, member 11                                            | <a href="#">NM_032415</a> | 4.82 | √ |
| CARF    | Collaborates/cooperates with ARF (alternate reading frame) protein                      | <a href="#">NM_017632</a> | 4.45 |   |
| CARM1   | Coactivator-associated arginine methyltransferase 1                                     | <a href="#">NM_199141</a> | 3.87 |   |
| CBFA2T2 | Core-binding factor, runt domain, a subunit 2; translocated to, 2, transcript variant 2 | <a href="#">NM_005093</a> | 2.2  |   |
| CBFA2T2 | Core-binding factor, runt domain, a subunit 2; translocated to, 2, transcript variant 1 | <a href="#">NM_175864</a> | 2.2  |   |
| CBFA2T3 | Core-binding factor, runt domain, a subunit 2; translocated to, 3, transcript variant 1 | <a href="#">NM_005187</a> | 2.3  | √ |
| CBFA2T3 | Core-binding factor, runt domain, a subunit 2; translocated to, 3, transcript variant 2 | <a href="#">NM_175931</a> | 2.3  |   |
| CBLB    | Cas-Br-M (murine) ecotropic retroviral transforming sequence b                          | <a href="#">NM_170662</a> | 2.77 | √ |
| CBX7    | Chromobox homolog 7                                                                     | <a href="#">NM_175709</a> | 6.39 |   |
| CCNJ    | Cyclin J                                                                                | <a href="#">NM_019084</a> | 3.52 |   |
| CCNK    | Cyclin K                                                                                | <a href="#">NM_003858</a> | 4.46 |   |
| CD163   | CD163 antigen, transcript variant 1                                                     | <a href="#">NM_004244</a> | 3.59 |   |
| CD163   | CD163 antigen, transcript variant 2                                                     | <a href="#">NM_203416</a> | 3.38 |   |
| CD4     | CD4 antigen (p55)                                                                       | <a href="#">NM_000616</a> | 2.83 |   |
| CDH13   | Cadherin 13, H-cadherin (heart)                                                         | <a href="#">NM_001257</a> | 1.88 |   |
| CDH2    | Cadherin 2, type 1, N-cadherin (neuronal)                                               | <a href="#">NM_001792</a> | 1.51 |   |
| CDYL    | Chromodomain protein, Y-like, transcript variant 1                                      | <a href="#">NM_004824</a> | 1.57 |   |
| CDYL    | Chromodomain protein, Y-like, transcript variant 3                                      | <a href="#">NM_170752</a> | 1.57 |   |
| CDYL    | Chromodomain protein, Y-like, transcript variant 2                                      | <a href="#">NM_170751</a> | 1.57 |   |



|              |                                                                                        |                           |             |   |
|--------------|----------------------------------------------------------------------------------------|---------------------------|-------------|---|
| CGGBP1       | CGG triplet repeat binding protein 1                                                   | <a href="#">NM_003663</a> | 0.95        |   |
| CGI-100      | CGI-100 protein                                                                        | <a href="#">NM_016040</a> | 2.16        |   |
| CGI-72       | CGI-72 protein, transcript variant 1                                                   | <a href="#">NM_016018</a> | 2.16        |   |
| CHD7         | Chromodomain helicase DNA binding protein 7                                            | <a href="#">NM_017780</a> | 1.86        |   |
| CHD9         | Chromodomain helicase DNA binding protein 9                                            | <a href="#">NM_025134</a> | 1.29        |   |
| <b>CHN1</b>  | <b>Chimerin 1</b>                                                                      | <a href="#">NM_001822</a> | <b>2.81</b> | √ |
| CHN2         | Chimerin 2                                                                             | <a href="#">NM_004067</a> | 2.63        |   |
| CLASP1       | Cytoplasmic linker associated protein 1                                                | <a href="#">NM_015282</a> | 5.96        |   |
| CLOCK        | Clock homolog (mouse)                                                                  | <a href="#">NM_004898</a> | 5.37        |   |
| CNR1         | Cannabinoid receptor 1 (brain), transcript variant 1                                   | <a href="#">NM_016083</a> | 1.92        |   |
| CNTN4        | Contactin 4, transcript variant 2                                                      | <a href="#">NM_175612</a> | 1.42        |   |
| CNTN4        | Contactin 4, transcript variant 1                                                      | <a href="#">NM_175607</a> | 1.42        |   |
| CNTNAP3      | Contactin associated protein-like 3                                                    | <a href="#">NM_033655</a> | 1.85        |   |
| COL4A3       | Collagen, type IV, a 3 (Goodpasture antigen), transcript variant 3                     | <a href="#">NM_031363</a> | 1.09        |   |
| <b>COPEB</b> | <b>Core promoter element binding protein</b>                                           | <a href="#">NM_001300</a> | <b>5.38</b> | √ |
| CPD          | Carboxypeptidase D                                                                     | <a href="#">NM_001304</a> | 4.49        |   |
| CPEB4        | Cytoplasmic polyadenylation element binding protein 4                                  | <a href="#">NM_030627</a> | 6.27        |   |
| <b>CREB1</b> | <b>cAMP responsive element binding protein 1, transcript variant A</b>                 | <a href="#">NM_004379</a> | <b>1.45</b> | √ |
| CREB1        | cAMP responsive element binding protein 1, transcript variant B                        | <a href="#">NM_134442</a> | 1.45        |   |
| CRIM1        | Cysteine-rich motor neuron 1                                                           | <a href="#">NM_016441</a> | 0.9         |   |
| CSDA         | Cold shock domain protein A                                                            | <a href="#">NM_003651</a> | 2.84        |   |
| CSNK1G1      | Casein kinase 1, g 1                                                                   | <a href="#">NM_022048</a> | 3.43        |   |
| CTCF         | CCCTC-binding factor (zinc finger protein)                                             | <a href="#">NM_006565</a> | 2.71        |   |
| CTDSPL       | CTD (carboxy-terminal domain, RNA polymerase II, polypeptide A) small phosphatase-like | <a href="#">NM_005808</a> | 9.58        |   |
| CUGBP2       | CUG triplet repeat, RNA binding protein 2                                              | <a href="#">NM_006561</a> | 2.4         |   |
| CUL3         | Cullin 3                                                                               | <a href="#">NM_003590</a> | 1.73        |   |
| CYR61        | Cysteine-rich, angiogenic inducer, 61                                                  | <a href="#">NM_001554</a> | 2.05        |   |
| DERL1        | Der1-like domain family, member 1                                                      | <a href="#">NM_024295</a> | 3.23        |   |
| DHX57        | DEAH (Asp-Glu-Ala-Asp/His) box polypeptide 57, transcript variant 1                    | <a href="#">NM_198963</a> | 4.15        |   |
| DIO2         | Deiodinase, iodothyronine, type II, transcript variant 1                               | <a href="#">NM_013989</a> | 1.44        |   |
| DIO2         | Deiodinase, iodothyronine, type II, transcript variant 2                               | <a href="#">NM_000793</a> | 1.44        |   |
| DNAJB5       | DnaJ (Hsp40) homolog, subfamily B, member 5                                            | <a href="#">NM_012266</a> | 2.53        |   |
| DNAJC21      | DnaJ (Hsp40) homolog, subfamily C, member 21                                           | <a href="#">NM_194283</a> | 2.67        |   |

|         |                                                          |                              |      |   |
|---------|----------------------------------------------------------|------------------------------|------|---|
| DNCLI2  | Dynein, cytoplasmic, light intermediate polypeptide 2    | <a href="#">NM_006141</a>    | 3    |   |
| DOCK7   | Dedicator of cytokinesis 7                               | <a href="#">NM_033407</a>    | 2.3  |   |
| DPP10   | Dipeptidylpeptidase 10, transcript variant 2             | <a href="#">NM_001004360</a> | 1.13 |   |
| DPP10   | Dipeptidylpeptidase 10, transcript variant 1             | <a href="#">NM_020868</a>    | 1.13 |   |
| DPYSL2  | Dihydropyrimidinase-like 2                               | <a href="#">NM_001386</a>    | 2.11 |   |
| DTNA    | Dystrobrevin, a, transcript variant 3                    | <a href="#">NM_001391</a>    | 2.06 |   |
| DTNA    | Dystrobrevin, a, transcript variant 4                    | <a href="#">NM_032978</a>    | 2.06 |   |
| DTNA    | Dystrobrevin, a, transcript variant 8                    | <a href="#">NM_032981</a>    | 2.06 |   |
| DTNA    | Dystrobrevin, a, transcript variant 5                    | <a href="#">NM_032979</a>    | 2.06 |   |
| E2F7    | E2F transcription factor 7                               | <a href="#">NM_203394</a>    | 1.87 |   |
| EED     | Embryonic ectoderm development, transcript variant 1     | <a href="#">NM_003797</a>    | 3.53 |   |
| EED     | Embryonic ectoderm development, transcript variant 2     | <a href="#">NM_152991</a>    | 2.24 |   |
| EEF1A1  | Eukaryotic translation elongation factor 1 a1            | <a href="#">NM_001402</a>    | 3.06 |   |
| EGR3    | Early growth response 3                                  | <a href="#">NM_004430</a>    | 1.36 |   |
| EIF4A2  | Eukaryotic translation initiation factor 4A, isoform 2   | <a href="#">NM_001967</a>    | 2.04 | √ |
| EN1     | Engrailed homolog 1                                      | <a href="#">NM_001426</a>    | 3.06 |   |
| EN2     | Engrailed homolog 2                                      | <a href="#">NM_001427</a>    | 1.55 |   |
| EPC2    | Enhancer of polycomb homolog 2 (Drosophila)              | <a href="#">NM_015630</a>    | 4.34 |   |
| EPHA4   | EPH receptor A4                                          | <a href="#">NM_004438</a>    | 1.64 |   |
| ESM1    | Endothelial cell-specific molecule 1                     | <a href="#">NM_007036</a>    | 3.95 |   |
| ESR1    | Estrogen receptor 1                                      | <a href="#">NM_000125</a>    | 1.94 |   |
| ETF1    | Eukaryotic translation termination factor 1              | <a href="#">NM_004730</a>    | 1.22 |   |
| ETV6    | Ets variant gene 6 (TEL oncogene)                        | <a href="#">NM_001987</a>    | 1.08 | √ |
| EYA1    | Eyes absent homolog 1 (Drosophila), transcript variant 3 | <a href="#">NM_000503</a>    | 2.17 |   |
| EYA1    | Eyes absent homolog 1 (Drosophila), transcript variant 1 | <a href="#">NM_172060</a>    | 2.17 |   |
| EYA1    | Eyes absent homolog 1 (Drosophila), transcript variant 2 | <a href="#">NM_172058</a>    | 2.17 |   |
| EYA1    | Eyes absent homolog 1 (Drosophila), transcript variant 4 | <a href="#">NM_172059</a>    | 2.17 |   |
| EYA3    | Eyes absent homolog 3 (Drosophila), transcript variant 2 | <a href="#">NM_172098</a>    | 6.41 |   |
| FAD104  | Factor for adipocyte differentiation 104                 | <a href="#">NM_022763</a>    | 2.17 |   |
| FALZ    | Fetal Alzheimer antigen, transcript variant 1            | <a href="#">NM_182641</a>    | 1.27 |   |
| FALZ    | Fetal Alzheimer antigen, transcript variant 2            | <a href="#">NM_004459</a>    | 1.27 |   |
| FAM117A | Family with sequence similarity 117, member A            | <a href="#">NM_030802</a>    | 2.76 |   |
| FAM126B | Family with sequence similarity 126, member B            | <a href="#">NM_173822</a>    | 1.07 |   |

|               |                                                                                                |                           |             |          |
|---------------|------------------------------------------------------------------------------------------------|---------------------------|-------------|----------|
| FAM222A       | Family with sequence similarity 222, member A                                                  | <a href="#">NM_032829</a> | 3.28        |          |
| FBN2          | Fibrillin 2 (congenital contractural arachnodactyly)                                           | <a href="#">NM_001999</a> | 2.82        |          |
| FBXO33        | F-box protein 33                                                                               | <a href="#">NM_203301</a> | 7.13        |          |
| FKBP1A        | FK506 binding protein 1A, 12 kDa, transcript variant 12B                                       | <a href="#">NM_000801</a> | 3.45        |          |
| FLJ40536      | FLJ40536 protein                                                                               | <a href="#">NM_207424</a> | 2.8         |          |
| FNDC3         | Fibronectin type III domain containing 3                                                       | <a href="#">NM_014923</a> | 1.08        |          |
| FOS           | V-fos FBJ murine osteosarcoma viral oncogene homolog                                           | <a href="#">NM_005252</a> | 2.14        |          |
| <b>FOXP1</b>  | <b>Forkhead box P1</b>                                                                         | <a href="#">NM_032682</a> | <b>5.24</b> | <b>√</b> |
| GABRA1        | γ-Aminobutyric acid (GABA) A receptor, α1                                                      | <a href="#">NM_000806</a> | 3.39        |          |
| GALNT1        | UDP-N-acetyl-α-D-galactosamine:polypeptide N-acetylgalactosaminyltransferase 1 (GalNAc-T1)     | <a href="#">NM_020474</a> | 2.91        |          |
| GARP          | Glycoprotein A repetitions predominant                                                         | <a href="#">NM_005512</a> | 2.36        |          |
| GLS           | Glutaminase                                                                                    | <a href="#">NM_014905</a> | 4.85        |          |
| GOLGA1        | Golgi autoantigen, golgin subfamily a, 1                                                       | <a href="#">NM_002077</a> | 2.68        |          |
| GPBP1         | GC-rich promoter binding protein 1 (GPBP; SSH6; Vasculin)                                      | <a href="#">NM_022913</a> | 4.71        |          |
| GPD1L         | Glycerol-3-phosphate dehydrogenase 1-like                                                      | <a href="#">NM_015141</a> | 3.09        |          |
| GRIA2         | Glutamate receptor, ionotropic, AMPA 2                                                         | <a href="#">NM_000826</a> | 2.65        |          |
| GRIK2         | Glutamate receptor, ionotropic, kainate 2, transcript variant 1                                | <a href="#">NM_021956</a> | 8.46        |          |
| GRIK2         | Glutamate receptor, ionotropic, kainate 2, transcript variant 2                                | <a href="#">NM_175768</a> | 7.55        |          |
| GRM5          | Glutamate receptor, metabotropic 5                                                             | <a href="#">NM_000842</a> | 4.23        |          |
| HECA          | Headcase homolog (Drosophila)                                                                  | <a href="#">NM_016217</a> | 2.82        |          |
| HERPUD1       | Homocysteine-inducible, endoplasmic reticulum stress-inducible, ubiquitin-like domain member 1 | <a href="#">NM_014685</a> | 2.35        |          |
| HIC2          | Hypermethylated in cancer 2                                                                    | <a href="#">NM_015094</a> | 8.66        |          |
| <b>HLF</b>    | <b>Hepatic leukemia factor</b>                                                                 | <a href="#">NM_002126</a> | <b>1.43</b> | <b>√</b> |
| <b>HOXA11</b> | <b>Homeo box A11</b>                                                                           | <a href="#">NM_005523</a> | <b>2.33</b> | <b>√</b> |
| HOXB5         | Homeo box B5                                                                                   | <a href="#">NM_002147</a> | 2.75        |          |
| HOXC8         | Homeo box C8                                                                                   | <a href="#">NM_022658</a> | 5.55        |          |
| HSH1N1        | HIV-1 induced protein HIN-1, transcript variant 1                                              | <a href="#">NM_199324</a> | 3.3         |          |
| ID4           | Inhibitor of DNA binding 4, dominant negative helix-loop-helix protein                         | <a href="#">NM_001546</a> | 3.07        |          |
| IGSF4D        | Immunoglobulin superfamily, member 4D                                                          | <a href="#">NM_153184</a> | 1.77        |          |
| IL1A          | Interleukin 1, α                                                                               | <a href="#">NM_000575</a> | 3.02        |          |
| IMP-2         | IGF-II mRNA-binding protein 2                                                                  | <a href="#">NM_006548</a> | 2           |          |
| INO80         | Homolog of yeast INO80, transcript variant 2                                                   | <a href="#">NM_032196</a> | 2.35        |          |

|          |                                                                                       |                           |       |   |
|----------|---------------------------------------------------------------------------------------|---------------------------|-------|---|
| INO80    | Homolog of yeast INO80, transcript variant 1                                          | <a href="#">NM_017553</a> | 2.34  |   |
| INPP5A   | Inositol polyphosphate-5-phosphatase, 40kDa                                           | <a href="#">NM_005539</a> | 2.26  |   |
| IRS2     | Insulin receptor substrate 2                                                          | <a href="#">NM_003749</a> | 1.99  |   |
| ITGA3    | Integrin, a3 (antigen CD49C, alpha 3 subunit of VLA-3 receptor), transcript variant b | <a href="#">NM_005501</a> | 3.16  |   |
| ITGA3    | Integrin, a3 (antigen CD49C, alpha 3 subunit of VLA-3 receptor), transcript variant a | <a href="#">NM_002204</a> | 3.1   |   |
| ITGB8    | Integrin, b8                                                                          | <a href="#">NM_002214</a> | 2.14  |   |
| IVNS1ABP | Influenza virus NS1A binding protein, transcript variant 2                            | <a href="#">NM_016389</a> | 1.53  |   |
| JARID1A  | Jumonji, AT rich interactive domain 1A (RBBP2-like)                                   | <a href="#">NM_005056</a> | 3.66  |   |
| JAZF1    | Juxtaposed with another zinc finger gene 1                                            | <a href="#">NM_175061</a> | 1.28  | √ |
| JDP2     | Jun dimerization protein 2                                                            | <a href="#">NM_130469</a> | 3.1   |   |
| KIAA0182 | KIAA0182 protein                                                                      | <a href="#">NM_014615</a> | 2.39  |   |
| KIAA0195 | KIAA0195 gene product                                                                 | <a href="#">NM_014738</a> | 13.77 |   |
| KIAA0252 | KIAA0252                                                                              | <a href="#">NM_015138</a> | 2.31  |   |
| KIAA0423 | KIAA0423                                                                              | <a href="#">NM_015091</a> | 3.06  |   |
| KIAA0433 | KIAA0433 protein                                                                      | <a href="#">NM_015216</a> | 3.49  |   |
| KIAA0528 | KIAA0528 gene product                                                                 | <a href="#">NM_014802</a> | 2.51  |   |
| KIAA0669 | KIAA0669 gene product                                                                 | <a href="#">NM_014779</a> | 1.68  |   |
| KIAA0802 | KIAA0802                                                                              | <a href="#">NM_015210</a> | 7.25  |   |
| KIAA0992 | Palladin                                                                              | <a href="#">NM_016081</a> | 2.17  |   |
| KIAA1128 | KIAA1128                                                                              | <a href="#">NM_018999</a> | 1.36  |   |
| KIT      | V-kit Hardy-Zuckerman 4 feline sarcoma viral oncogene homolog                         | <a href="#">NM_000222</a> | 3.43  | √ |
| KLF15    | Kruppel-like factor 15                                                                | <a href="#">NM_014079</a> | 2.59  |   |
| KLHL2    | Kelch-like 2, Mayven (Drosophila)                                                     | <a href="#">NM_007246</a> | 2.14  |   |
| KLHL5    | Kelch-like 5 (Drosophila), transcript variant b                                       | <a href="#">NM_199039</a> | 3.36  |   |
| KPNA1    | Karyopherin a1 (importin a5)                                                          | <a href="#">NM_002264</a> | 2.17  |   |
| KPNB1    | Karyopherin (importin) b1                                                             | <a href="#">NM_002265</a> | 4.83  |   |
| KRAS2    | v-Ki-ras2 Kirsten rat sarcoma 2 viral oncogene homolog, transcript variant b          | <a href="#">NM_004985</a> | 3.09  |   |
| KRAS2    | v-Ki-ras2 Kirsten rat sarcoma 2 viral oncogene homolog, transcript variant a          | <a href="#">NM_033360</a> | 3     |   |
| LBR      | Lamin B receptor, transcript variant 2                                                | <a href="#">NM_194442</a> | 1.18  |   |
| LBR      | Lamin B receptor, transcript variant 1                                                | <a href="#">NM_002296</a> | 1.18  |   |
| LEMD3    | LEM domain containing 3                                                               | <a href="#">NM_014319</a> | 2.07  |   |
| LIN28    | Lin-28 homolog ( <i>C. elegans</i> )                                                  | <a href="#">NM_024674</a> | 2.05  |   |

|           |                                                                        |                              |      |   |
|-----------|------------------------------------------------------------------------|------------------------------|------|---|
| LIN28B    | Lin-28 homolog B ( <i>C. elegans</i> )                                 | <a href="#">NM_001004317</a> | 3.64 |   |
| LIN7C     | Lin-7 homolog C ( <i>C. elegans</i> )                                  | <a href="#">NM_018362</a>    | 1.04 |   |
| LMO1      | LIM domain only 1 (rhombotin 1)                                        | <a href="#">NM_002315</a>    | 4.18 | √ |
| LMO3      | LIM domain only 3 (rhombotin-like 2), transcript variant 1             | <a href="#">NM_018640</a>    | 2.56 |   |
| LMO3      | LIM domain only 3 (rhombotin-like 2), transcript variant 2             | <a href="#">NM_001001395</a> | 2.56 |   |
| LONRF1    | LON peptidase N-terminal domain and ring finger 1                      | <a href="#">NM_152271</a>    | 1.65 |   |
| LRBA      | LPS-responsive vesicle trafficking, beach and anchor containing        | <a href="#">NM_006726</a>    | 1.85 |   |
| LRP12     | Low density lipoprotein-related protein 12                             | <a href="#">NM_013437</a>    | 1.4  |   |
| LRRC5     | Leucine rich repeat containing 5                                       | <a href="#">NM_018103</a>    | 6.25 |   |
| LRRN1     | Leucine rich repeat neuronal 1                                         | <a href="#">NM_020873</a>    | 1.84 |   |
| MAK3      | Mak3 homolog ( <i>S. cerevisiae</i> )                                  | <a href="#">NM_025146</a>    | 1.31 |   |
| MAMDC2    | MAM domain containing 2                                                | <a href="#">NM_153267</a>    | 3.04 |   |
| MAP1A     | Microtubule-associated protein 1A                                      | <a href="#">NM_002373</a>    | 4.2  |   |
| MAP1B     | Microtubule-associated protein 1B, transcript variant 2                | <a href="#">NM_032010</a>    | 1.54 |   |
| MAP1B     | Microtubule-associated protein 1B, transcript variant 1                | <a href="#">NM_005909</a>    | 1.54 |   |
| MAP3K10   | Mitogen-activated protein kinase kinase kinase 10                      | <a href="#">NM_002446</a>    | 4.57 |   |
| MAP3K3    | Mitogen-activated protein kinase kinase kinase 3, transcript variant 1 | <a href="#">NM_203351</a>    | 2.46 |   |
| MAP3K3    | Mitogen-activated protein kinase kinase kinase 3, transcript variant 2 | <a href="#">NM_002401</a>    | 2.46 |   |
| MB21D2    | Mab-21 domain containing 2                                             | <a href="#">NM_178496</a>    | 2.29 |   |
| MBNL2     | Muscleblind-like 2 ( <i>Drosophila</i> ), transcript variant 3         | <a href="#">NM_207304</a>    | 0.97 |   |
| MBNL2     | Muscleblind-like 2 ( <i>Drosophila</i> ), transcript variant 1         | <a href="#">NM_144778</a>    | 0.95 |   |
| MEAF6     | MYST/Esa1-associated factor 6                                          | <a href="#">NM_022756</a>    | 1.93 |   |
| MECP2     | Methyl CpG binding protein 2 (Rett syndrome)                           | <a href="#">NM_004992</a>    | 0.46 |   |
| MFSD6     | Major facilitator superfamily domain containing 6                      | <a href="#">NM_017694</a>    | 2.3  |   |
| MINK      | Misshapen/NIK-related kinase, transcript variant 1                     | <a href="#">NM_015716</a>    | 3.86 |   |
| MINK      | Misshapen/NIK-related kinase, transcript variant 3                     | <a href="#">NM_153827</a>    | 3.86 |   |
| MINK      | Misshapen/NIK-related kinase, transcript variant 2                     | <a href="#">NM_170663</a>    | 3.86 |   |
| MIR4697HG | MIR4697 host gene (non-protein coding)                                 | <a href="#">NM_001001873</a> | 2.23 |   |
| MMP14     | Matrix metalloproteinase 14 (membrane-inserted)                        | <a href="#">NM_004995</a>    | 6.18 |   |
| MPP5      | Membrane protein, palmitoylated 5 (MAGUK p55 subfamily member 5)       | <a href="#">NM_022474</a>    | 4.99 |   |

|        |                                                                                                    |                           |      |   |
|--------|----------------------------------------------------------------------------------------------------|---------------------------|------|---|
| MTCH2  | Mitochondrial carrier homolog 2 ( <i>C. elegans</i> ), nuclear gene encoding mitochondrial protein | <a href="#">NM_014342</a> | 1.72 |   |
| MTPN   | Myotrophin                                                                                         | <a href="#">NM_145808</a> | 0.82 |   |
| MTURN  | Maturin, neural progenitor differentiation regulator homolog (Xenopus) (Ells1; C7orf41)            | <a href="#">NM_152793</a> | 2.49 |   |
| MYCN   | V-myc myelocytomatosis viral related oncogene, neuroblastoma derived (avian)                       | <a href="#">NM_005378</a> | 2.02 | √ |
| MYH10  | Myosin, heavy polypeptide 10, non-muscle                                                           | <a href="#">NM_005964</a> | 2.08 |   |
| NAT5   | <i>N</i> -acetyltransferase 5 (ARD1 homolog, <i>S. cerevisiae</i> ), transcript variant 2          | <a href="#">NM_181527</a> | 2.5  |   |
| NAT5   | <i>N</i> -acetyltransferase 5 (ARD1 homolog, <i>S. cerevisiae</i> ), transcript variant 1          | <a href="#">NM_016100</a> | 2.5  |   |
| NAT5   | <i>N</i> -acetyltransferase 5 (ARD1 homolog, <i>S. cerevisiae</i> ), transcript variant 3          | <a href="#">NM_181528</a> | 2.48 |   |
| NCALD  | Neurocalcin delta                                                                                  | <a href="#">NM_032041</a> | 3.92 |   |
| NCOA2  | Nuclear receptor coactivator 2                                                                     | <a href="#">NM_006540</a> | 1.77 | √ |
| NIPBL  | Nipped-B homolog (Drosophila), transcript variant A                                                | <a href="#">NM_133433</a> | 2.86 |   |
| NKX2-2 | NK2 transcription factor related, locus 2 (Drosophila)                                             | <a href="#">NM_002509</a> | 2.68 |   |
| NLK    | Nemo like kinase                                                                                   | <a href="#">NM_016231</a> | 1.14 |   |
| NMT2   | <i>N</i> -myristoyltransferase 2                                                                   | <a href="#">NM_004808</a> | 5.04 |   |
| NOVA1  | Neuro-oncological ventral antigen 1, transcript variant 2                                          | <a href="#">NM_006489</a> | 3.48 |   |
| NOVA1  | Neuro-oncological ventral antigen 1, transcript variant 1                                          | <a href="#">NM_002515</a> | 3.48 |   |
| NPD014 | NPD014 protein, transcript variant 1                                                               | <a href="#">NM_207035</a> | 1.22 |   |
| NPEPPS | Aminopeptidase puromycin sensitive                                                                 | <a href="#">NM_006310</a> | 1.83 |   |
| NPM1   | Nucleophosmin (nucleolar phosphoprotein B23, numatrin)                                             | <a href="#">NM_002520</a> | 2.71 |   |
| NPM1   | Nucleophosmin (nucleolar phosphoprotein B23, numatrin)                                             | <a href="#">NM_199185</a> | 2.71 |   |
| NPTXR  | Neuronal pentraxin receptor, transcript variant 2                                                  | <a href="#">NM_058178</a> | 3.9  |   |
| NPTXR  | Neuronal pentraxin receptor, transcript variant 1                                                  | <a href="#">NM_014293</a> | 3.9  |   |
| NR3C1  | Nuclear receptor subfamily 3, group C, member 1 (glucocorticoid receptor)                          | <a href="#">NM_000176</a> | 2.1  |   |
| NR4A3  | Nuclear receptor subfamily 4, group A, member 3, transcript variant 1                              | <a href="#">NM_006981</a> | 2.15 | √ |
| NR4A3  | Nuclear receptor subfamily 4, group A, member 3, transcript variant 3                              | <a href="#">NM_173200</a> | 2.15 |   |
| NR4A3  | Nuclear receptor subfamily 4, group A, member 3, transcript variant 2                              | <a href="#">NM_173198</a> | 2.15 |   |
| NR6A1  | Nuclear receptor subfamily 6, group A, member 1, transcript variant 1                              | <a href="#">NM_033334</a> | 3.54 |   |
| NR6A1  | Nuclear receptor subfamily 6, group A, member 1, transcript variant 3                              | <a href="#">NM_033335</a> | 3.54 |   |
| NR6A1  | Nuclear receptor subfamily 6, group A, member 1, transcript variant 2                              | <a href="#">NM_001489</a> | 3.54 |   |
| NRXN1  | Neurexin 1, transcript variant a                                                                   | <a href="#">NM_004801</a> | 1.57 |   |
| NRXN1  | Neurexin 1, transcript variant b                                                                   | <a href="#">NM_138735</a> | 1.57 |   |

|         |                                                                                                                                                                                  |                              |       |  |
|---------|----------------------------------------------------------------------------------------------------------------------------------------------------------------------------------|------------------------------|-------|--|
| NSMAF   | Neutral sphingomyelinase (N-SMase) activation associated factor                                                                                                                  | <a href="#">NM_003580</a>    | 3.78  |  |
| OGT     | <i>O</i> -linked <i>N</i> -acetylglucosamine (GlcNAc) transferase (UDP- <i>N</i> -acetylglucosamine:polypeptide- <i>N</i> -acetylglucosaminyl transferase), transcript variant 3 | <a href="#">NM_003605</a>    | 1.75  |  |
| OGT     | <i>O</i> -linked <i>N</i> -acetylglucosamine (GlcNAc) transferase (UDP- <i>N</i> -acetylglucosamine:polypeptide- <i>N</i> -acetylglucosaminyl transferase), transcript variant 2 | <a href="#">NM_181673</a>    | 1.54  |  |
| OGT     | <i>O</i> -linked <i>N</i> -acetylglucosamine (GlcNAc) transferase (UDP- <i>N</i> -acetylglucosamine:polypeptide- <i>N</i> -acetylglucosaminyl transferase), transcript variant 1 | <a href="#">NM_181672</a>    | 1.54  |  |
| OSBPL3  | Oxysterol binding protein-like 3, transcript variant 3                                                                                                                           | <a href="#">NM_145321</a>    | 10.41 |  |
| OSBPL3  | Oxysterol binding protein-like 3, transcript variant 2                                                                                                                           | <a href="#">NM_145320</a>    | 10.41 |  |
| OSBPL3  | Oxysterol binding protein-like 3, transcript variant 1                                                                                                                           | <a href="#">NM_015550</a>    | 10.41 |  |
| OSBPL3  | Oxysterol binding protein-like 3, transcript variant 4                                                                                                                           | <a href="#">NM_145322</a>    | 10.41 |  |
| OSBPL3  | Oxysterol binding protein-like 3, transcript variant 5                                                                                                                           | <a href="#">NM_145323</a>    | 10.19 |  |
| OSBPL3  | Oxysterol binding protein-like 3, transcript variant 6                                                                                                                           | <a href="#">NM_145324</a>    | 10.19 |  |
| OSBPL8  | Oxysterol binding protein-like 8, transcript variant 2                                                                                                                           | <a href="#">NM_001003712</a> | 2.61  |  |
| OSBPL8  | Oxysterol binding protein-like 8, transcript variant 1                                                                                                                           | <a href="#">NM_020841</a>    | 2.61  |  |
| PAK4    | p21(CDKN1A)-activated kinase 4                                                                                                                                                   | <a href="#">NM_005884</a>    | 3.57  |  |
| PAM     | Peptidylglycine alpha-amidating monooxygenase, transcript variant 4                                                                                                              | <a href="#">NM_138822</a>    | 2.39  |  |
| PAM     | Peptidylglycine alpha-amidating monooxygenase, transcript variant 1                                                                                                              | <a href="#">NM_000919</a>    | 2.39  |  |
| PAM     | Peptidylglycine alpha-amidating monooxygenase, transcript variant 3                                                                                                              | <a href="#">NM_138821</a>    | 2.39  |  |
| PAM     | Peptidylglycine alpha-amidating monooxygenase, transcript variant 2                                                                                                              | <a href="#">NM_138766</a>    | 2.39  |  |
| PAPOLG  | Poly(A) polymerase g                                                                                                                                                             | <a href="#">NM_022894</a>    | 1.34  |  |
| PAWR    | PRKC, apoptosis, WT1, regulator                                                                                                                                                  | <a href="#">NM_002583</a>    | 2.67  |  |
| PBX3    | Pre-B-cell leukemia transcription factor 3                                                                                                                                       | <a href="#">NM_006195</a>    | 2.02  |  |
| PCBP1   | Poly(rC) binding protein 1                                                                                                                                                       | <a href="#">NM_006196</a>    | 2.67  |  |
| PCDHA1  | Protocadherin a1, transcript variant 1                                                                                                                                           | <a href="#">NM_018900</a>    | 3.41  |  |
| PCDHA1  | Protocadherin a1, transcript variant 3                                                                                                                                           | <a href="#">NM_031411</a>    | 3.41  |  |
| PCDHA10 | Protocadherin a10, transcript variant 1                                                                                                                                          | <a href="#">NM_018901</a>    | 3.41  |  |
| PCDHA10 | Protocadherin a10, transcript variant 3                                                                                                                                          | <a href="#">NM_031860</a>    | 3.41  |  |
| PCDHA11 | Protocadherin a11, transcript variant 1                                                                                                                                          | <a href="#">NM_018902</a>    | 3.41  |  |
| PCDHA12 | Protocadherin a12, transcript variant 1                                                                                                                                          | <a href="#">NM_018903</a>    | 3.41  |  |



|               |                                                                           |                           |             |          |
|---------------|---------------------------------------------------------------------------|---------------------------|-------------|----------|
| PCDHA13       | Protocadherin a13, transcript variant 1                                   | <a href="#">NM_018904</a> | 3.41        |          |
| PCDHA2        | Protocadherin a2, transcript variant 1                                    | <a href="#">NM_018905</a> | 3.41        |          |
| PCDHA3        | Protocadherin a3, transcript variant 1                                    | <a href="#">NM_018906</a> | 3.41        |          |
| PCDHA4        | Protocadherin a4, transcript variant 1                                    | <a href="#">NM_018907</a> | 3.41        |          |
| PCDHA5        | Protocadherin a5, transcript variant 1                                    | <a href="#">NM_018908</a> | 3.41        |          |
| PCDHA6        | Protocadherin a6, transcript variant 3                                    | <a href="#">NM_031849</a> | 3.41        |          |
| PCDHA6        | Protocadherin a6, transcript variant 1                                    | <a href="#">NM_018909</a> | 3.41        |          |
| PCDHA7        | Protocadherin a7, transcript variant 1                                    | <a href="#">NM_018910</a> | 3.41        |          |
| PCDHA8        | Protocadherin a8, transcript variant 1                                    | <a href="#">NM_018911</a> | 3.41        |          |
| PCDHA9        | Protocadherin a9, transcript variant 1                                    | <a href="#">NM_031857</a> | 3.41        |          |
| PCDHAC1       | Protocadherin a subfamily C, 1, transcript variant 1                      | <a href="#">NM_018898</a> | 3.41        |          |
| PCDHAC2       | Protocadherin a subfamily C, 2, transcript variant 1                      | <a href="#">NM_018899</a> | 3.41        |          |
| PCNP          | PEST-containing nuclear protein                                           | <a href="#">NM_020357</a> | 3.97        |          |
| PDE3A         | Phosphodiesterase 3A, cGMP-inhibited                                      | <a href="#">NM_000921</a> | 2.97        |          |
| <b>PDGFRA</b> | <b>Platelet-derived growth factor receptor, a polypeptide</b>             | <a href="#">NM_006206</a> | <b>2.45</b> | <b>√</b> |
| PK4           | Pyruvate dehydrogenase kinase, isoenzyme 4                                | <a href="#">NM_002612</a> | 1.88        |          |
| PFTK1         | PFTAIRE protein kinase 1                                                  | <a href="#">NM_012395</a> | 2.23        |          |
| PHF15         | PHD finger protein 15                                                     | <a href="#">NM_015288</a> | 2.99        |          |
| PHF3          | PHD finger protein 3                                                      | <a href="#">NM_015153</a> | 2.03        |          |
| PHIP          | Peckstrin homology domain interacting protein                             | <a href="#">NM_017934</a> | 4.27        |          |
| PHLDA1        | Pleckstrin homology-like domain, family A, member 1                       | <a href="#">NM_007350</a> | 2.18        |          |
| <b>PHOX2B</b> | <b>Paired-like homeobox 2b</b>                                            | <a href="#">NM_003924</a> | <b>2.03</b> | <b>√</b> |
| PI4KII        | Phosphatidylinositol 4-kinase type II                                     | <a href="#">NM_018425</a> | 1.75        |          |
| PIAS3         | Protein inhibitor of activated STAT, 3                                    | <a href="#">NM_006099</a> | 2.58        |          |
| PIK3R3        | Phosphoinositide-3-kinase, regulatory subunit 3 (p55, g)                  | <a href="#">NM_003629</a> | 1.98        |          |
| PIP3AP        | Phosphatidylinositol-3-phosphate associated protein                       | <a href="#">NM_019061</a> | 6.5         |          |
| PKNOX2        | PBX/knotted 1 homeobox 2                                                  | <a href="#">NM_022062</a> | 2.3         |          |
| <b>PLAG1</b>  | <b>Pleiomorphic adenoma gene 1</b>                                        | <a href="#">NM_002655</a> | <b>2.63</b> | <b>√</b> |
| PLCL2         | Phospholipase C-like 2                                                    | <a href="#">NM_015184</a> | 4           |          |
| PLEKHJ1       | Pleckstrin homology domain containing, family J member 1                  | <a href="#">NM_018049</a> | 3.91        |          |
| PNRC2         | Proline-rich nuclear receptor coactivator 2                               | <a href="#">NM_017761</a> | 2.93        |          |
| PPARGC1A      | Peroxisome proliferative activated receptor, g, coactivator 1, a          | <a href="#">NM_013261</a> | 0.58        |          |
| PPP1CB        | Protein phosphatase 1, catalytic subunit, b isoform, transcript variant 3 | <a href="#">NM_206876</a> | 1.36        |          |
| PPP1CB        | Protein phosphatase 1, catalytic subunit, b isoform, transcript variant 1 | <a href="#">NM_002709</a> | 1.36        |          |



|           |                                                                                                      |                           |      |  |
|-----------|------------------------------------------------------------------------------------------------------|---------------------------|------|--|
| PPP1CB    | Protein phosphatase 1, catalytic subunit, b isoform, transcript variant 2                            | <a href="#">NM_206877</a> | 1.34 |  |
| PPP1R12B  | Protein phosphatase 1, regulatory (inhibitor) subunit 12B, transcript variant 1                      | <a href="#">NM_002481</a> | 5.26 |  |
| PPP1R12B  | Protein phosphatase 1, regulatory (inhibitor) subunit 12B, transcript variant 2                      | <a href="#">NM_032105</a> | 5.21 |  |
| PPP3R1    | Protein phosphatase 3 (formerly 2B), regulatory subunit B, 19 kDa, a isoform (calcineurin B, type I) | <a href="#">NM_000945</a> | 1.17 |  |
| PRDM10    | PR domain containing 10, transcript variant 2                                                        | <a href="#">NM_199437</a> | 0.9  |  |
| PRDM10    | PR domain containing 10, transcript variant 4                                                        | <a href="#">NM_199439</a> | 0.9  |  |
| PRDM10    | PR domain containing 10, transcript variant 3                                                        | <a href="#">NM_199438</a> | 0.9  |  |
| PRDM10    | PR domain containing 10, transcript variant 1                                                        | <a href="#">NM_020228</a> | 0.9  |  |
| PRKCD     | Protein kinase C, delta, transcript variant 1                                                        | <a href="#">NM_006254</a> | 3.02 |  |
| PRKCD     | Protein kinase C, delta, transcript variant 2                                                        | <a href="#">NM_212539</a> | 3.02 |  |
| PRKCE     | Protein kinase C, epsilon                                                                            | <a href="#">NM_005400</a> | 3.44 |  |
| PSAP      | Prosaposin (variant Gaucher disease and variant metachromatic leukodystrophy)                        | <a href="#">NM_002778</a> | 2.53 |  |
| PTPN9     | Protein tyrosine phosphatase, non-receptor type 9                                                    | <a href="#">NM_002833</a> | 1.93 |  |
| PUM1      | Pumilio homolog 1 (Drosophila)                                                                       | <a href="#">NM_014676</a> | 1.36 |  |
| PURB      | Purine-rich element binding protein B                                                                | <a href="#">NM_033224</a> | 1.33 |  |
| RAB11A    | RAB11A, member RAS oncogene family                                                                   | <a href="#">NM_004663</a> | 1.26 |  |
| RAB11FIP2 | RAB11 family interacting protein 2 (class I)                                                         | <a href="#">NM_014904</a> | 0.52 |  |
| RAD21     | RAD21 homolog ( <i>S. pombe</i> )                                                                    | <a href="#">NM_006265</a> | 1.37 |  |
| RAN       | RAN, member RAS oncogene family                                                                      | <a href="#">NM_006325</a> | 3.04 |  |
| RAP1B     | RAP1B, member of RAS oncogene family                                                                 | <a href="#">NM_015646</a> | 1.58 |  |
| RAPH1     | Ras association (RalGDS/AF-6) and pleckstrin homology domains 1, transcript variant 1                | <a href="#">NM_213589</a> | 2.65 |  |
| RBM22     | RNA binding motif protein 22                                                                         | <a href="#">NM_018047</a> | 3.3  |  |
| RBM47     | RNA binding motif protein 47                                                                         | <a href="#">NM_019027</a> | 4.67 |  |
| RECK      | Reversion-inducing-cysteine-rich protein with kazal motifs                                           | <a href="#">NM_021111</a> | 1.6  |  |
| RFP2      | Ret finger protein 2, transcript variant 2                                                           | <a href="#">NM_052811</a> | 1.3  |  |
| RFP2      | Ret finger protein 2, transcript variant 1                                                           | <a href="#">NM_005798</a> | 1.3  |  |
| RFP2      | Ret finger protein 2, transcript variant 3                                                           | <a href="#">NM_213590</a> | 1.3  |  |
| RGMA      | RGM domain family, member A                                                                          | <a href="#">NM_020211</a> | 4.62 |  |
| RKHD2     | Ring finger and KH domain containing 2                                                               | <a href="#">NM_016626</a> | 2.92 |  |
| RKHD3     | Ring finger and KH domain containing 3                                                               | <a href="#">NM_032246</a> | 1.54 |  |
| RLF       | Rearranged L-myc fusion sequence                                                                     | <a href="#">NM_012421</a> | 6.16 |  |

|         |                                                                                                                  |                              |      |   |
|---------|------------------------------------------------------------------------------------------------------------------|------------------------------|------|---|
| RNF110  | Ring finger protein 110                                                                                          | <a href="#">NM_007144</a>    | 3.77 |   |
| RNF145  | Ring finger protein 145                                                                                          | <a href="#">NM_144726</a>    | 3.02 |   |
| RNF182  | Ring finger protein 182                                                                                          | <a href="#">NM_152737</a>    | 3.66 |   |
| RNF2    | Ring finger protein 2                                                                                            | <a href="#">NM_007212</a>    | 0.9  |   |
| RNF34   | Ring finger protein 34, transcript variant 2                                                                     | <a href="#">NM_025126</a>    | 3.7  |   |
| RNF34   | Ring finger protein 34, transcript variant 1                                                                     | <a href="#">NM_194271</a>    | 3.7  |   |
| RP42    | RP42 homolog                                                                                                     | <a href="#">NM_020640</a>    | 2.2  |   |
| RRAGA   | Ras-related GTP binding A                                                                                        | <a href="#">NM_006570</a>    | 2.9  |   |
| RSN     | Restin (Reed-Steinberg cell-expressed intermediate filament-associated protein), transcript variant 1            | <a href="#">NM_002956</a>    | 5.5  |   |
| RSN     | Restin (Reed-Steinberg cell-expressed intermediate filament-associated protein), transcript variant 2            | <a href="#">NM_198240</a>    | 5.5  |   |
| RSPO2   | R-spondin 2                                                                                                      | <a href="#">NM_178565</a>    | 2.41 |   |
| RUNX1   | Runt-related transcription factor 1 (acute myeloid leukemia 1; aml1 oncogene), transcript variant 1              | <a href="#">NM_001754</a>    | 1.8  | √ |
| RUNX1   | Runt-related transcription factor 1 (acute myeloid leukemia 1; aml1 oncogene), transcript variant 2              | <a href="#">NM_001001890</a> | 1.8  |   |
| S100BPB | S100P binding protein                                                                                            | <a href="#">NM_022753</a>    | 2.18 |   |
| SCHIP1  | Schwannomin interacting protein 1                                                                                | <a href="#">NM_014575</a>    | 2.37 |   |
| SDF2L1  | Stromal cell-derived factor 2-like 1                                                                             | <a href="#">NM_022044</a>    | 4.54 |   |
| SDFR1   | Stromal cell derived factor receptor 1, transcript variant b                                                     | <a href="#">NM_012428</a>    | 1.75 |   |
| SDFR1   | Stromal cell derived factor receptor 1, transcript variant a                                                     | <a href="#">NM_017455</a>    | 1.75 |   |
| SEC24C  | SEC24 related gene family, member C ( <i>S. cerevisiae</i> ), transcript variant 1                               | <a href="#">NM_004922</a>    | 2.32 |   |
| SEC24C  | SEC24 related gene family, member C ( <i>S. cerevisiae</i> ), transcript variant 2                               | <a href="#">NM_198597</a>    | 2.32 |   |
| SEL1L   | Sel-1 suppressor of lin-12-like ( <i>C. elegans</i> )                                                            | <a href="#">NM_005065</a>    | 2.97 |   |
| SEMA4C  | Sema domain, immunoglobulin domain (Ig), transmembrane domain (TM) and short cytoplasmic domain, (semaphorin) 4C | <a href="#">NM_017789</a>    | 2.76 |   |
| SEMA4G  | Sema domain, immunoglobulin domain (Ig), transmembrane domain (TM) and short cytoplasmic domain, (semaphorin) 4G | <a href="#">NM_017893</a>    | 5.88 |   |
| SENP1   | SUMO1/sentrin specific protease 1                                                                                | <a href="#">NM_014554</a>    | 3.68 |   |
| SENP7   | SUMO1/sentrin specific protease 7                                                                                | <a href="#">NM_020654</a>    | 1.19 |   |
| SEPT3   | Septin 3, transcript variant A                                                                                   | <a href="#">NM_145733</a>    | 5.79 |   |
| SEPT3   | Septin 3, transcript variant C                                                                                   | <a href="#">NM_145734</a>    | 5.15 |   |
| SEPT3   | septin 3, transcript variant B                                                                                   | <a href="#">NM_019106</a>    | 3.37 |   |

|          |                                                                                                                                                  |                           |      |  |
|----------|--------------------------------------------------------------------------------------------------------------------------------------------------|---------------------------|------|--|
| SERPINB5 | Serine (or cysteine) proteinase inhibitor, clade B (ovalbumin), member 5                                                                         | <a href="#">NM_002639</a> | 2.28 |  |
| SF3B1    | Splicing factor 3b, subunit 1, 155 kDa, transcript variant 1                                                                                     | <a href="#">NM_012433</a> | 2.79 |  |
| SFRS7    | Splicing factor, arginine/serine-rich 7, 35 kDa                                                                                                  | <a href="#">NM_006276</a> | 1.99 |  |
| SH2D3C   | SH2 domain containing 3C                                                                                                                         | <a href="#">NM_170600</a> | 4.21 |  |
| SIAT8D   | Sialyltransferase 8D (a-2, 8-polysialyltransferase), transcript variant 1                                                                        | <a href="#">NM_005668</a> | 1.31 |  |
| SIRT1    | Sirtuin (silent mating type information regulation 2 homolog) 1 ( <i>S. cerevisiae</i> )                                                         | <a href="#">NM_012238</a> | 3.91 |  |
| SIX2     | Sine oculis homeobox homolog 2 (Drosophila)                                                                                                      | <a href="#">NM_016932</a> | 3.37 |  |
| SLAIN1   | SLAIN motif family, member 1                                                                                                                     | <a href="#">NM_144595</a> | 1.87 |  |
| SLC25A25 | Solute carrier family 25 (mitochondrial carrier; phosphate carrier), member 25                                                                   | <a href="#">NM_052901</a> | 3.28 |  |
| SLC25A3  | Solute carrier family 25 (mitochondrial carrier; phosphate carrier), member 3, nuclear gene encoding mitochondrial protein, transcript variant 4 | <a href="#">NM_213612</a> | 1.65 |  |
| SLC31A1  | Solute carrier family 31 (copper transporters), member 1                                                                                         | <a href="#">NM_001859</a> | 0.87 |  |
| SLC38A2  | Solute carrier family 38, member 2                                                                                                               | <a href="#">NM_018976</a> | 0.87 |  |
| SLC39A12 | Solute carrier family 39 (zinc transporter), member 12                                                                                           | <a href="#">NM_152725</a> | 2.58 |  |
| SLC9A6   | Solute carrier family 9 (sodium/hydrogen exchanger), isoform 6                                                                                   | <a href="#">NM_006359</a> | 1.77 |  |
| SLITRK1  | SLIT and NTRK-like family, member 1                                                                                                              | <a href="#">NM_052910</a> | 1.51 |  |
| SLITRK2  | SLIT and NTRK-like family, member 2                                                                                                              | <a href="#">NM_032539</a> | 1.93 |  |
| SLITRK3  | SLIT and NTRK-like family, member 3                                                                                                              | <a href="#">NM_014926</a> | 2.03 |  |
| SMAD7    | SMAD, mothers against DPP homolog 7 (Drosophila)                                                                                                 | <a href="#">NM_005904</a> | 2.03 |  |
| SNN      | Stannin                                                                                                                                          | <a href="#">NM_003498</a> | 1.62 |  |
| SON      | SON DNA binding protein, transcript variant g                                                                                                    | <a href="#">NM_003103</a> | 1.85 |  |
| SON      | SON DNA binding protein, transcript variant a                                                                                                    | <a href="#">NM_138925</a> | 1.83 |  |
| SON      | SON DNA binding protein, transcript variant f                                                                                                    | <a href="#">NM_138927</a> | 1.79 |  |
| SON      | SON DNA binding protein, transcript variant c                                                                                                    | <a href="#">NM_138926</a> | 1.52 |  |
| SON      | SON DNA binding protein, transcript variant e                                                                                                    | <a href="#">NM_058183</a> | 1.24 |  |
| SOWAHA   | Sosondawah ankyrin repeat domain family member A                                                                                                 | <a href="#">NM_175873</a> | 3.57 |  |
| SOX5     | SRY (sex determining region Y)-box 5, transcript variant 2                                                                                       | <a href="#">NM_152989</a> | 2.29 |  |
| SOX5     | SRY (sex determining region Y)-box 5, transcript variant 3                                                                                       | <a href="#">NM_178010</a> | 2.29 |  |
| SOX5     | SRY (sex determining region Y)-box 5, transcript variant 1                                                                                       | <a href="#">NM_006940</a> | 2.29 |  |
| SOX6     | SRY (sex determining region Y)-box 6                                                                                                             | <a href="#">NM_033326</a> | 5.47 |  |
| SPRY4    | Sprouty homolog 4 (Drosophila)                                                                                                                   | <a href="#">NM_030964</a> | 1.16 |  |

|         |                                                                                       |                              |      |   |
|---------|---------------------------------------------------------------------------------------|------------------------------|------|---|
| SS18L1  | Synovial sarcoma translocation gene on chromosome 18-like 1, transcript variant 2     | <a href="#">NM_015558</a>    | 3.67 | √ |
| SS18L1  | Synovial sarcoma translocation gene on chromosome 18-like 1, transcript variant 1     | <a href="#">NM_198935</a>    | 3.17 |   |
| SSX2IP  | Synovial sarcoma, X breakpoint 2 interacting protein                                  | <a href="#">NM_014021</a>    | 1.44 |   |
| STC1    | Stanniocalcin 1                                                                       | <a href="#">NM_003155</a>    | 1.26 |   |
| STRBP   | Spermatid perinuclear RNA binding protein                                             | <a href="#">NM_018387</a>    | 2.52 |   |
| SUHW4   | Suppressor of hairy wing homolog 4 (Drosophila), transcript variant 1                 | <a href="#">NM_017661</a>    | 1.44 |   |
| SUHW4   | Suppressor of hairy wing homolog 4 (Drosophila), transcript variant 2                 | <a href="#">NM_001002843</a> | 1.44 |   |
| SYNE1   | Spectrin repeat containing, nuclear envelope 1, transcript variant b                  | <a href="#">NM_015293</a>    | 2.72 |   |
| SYNE1   | Spectrin repeat containing, nuclear envelope 1, transcript variant longest            | <a href="#">NM_182961</a>    | 2.72 |   |
| SYNE1   | Spectrin repeat containing, nuclear envelope 1, transcript variant a                  | <a href="#">NM_133650</a>    | 2.72 |   |
| SYNE1   | Spectrin repeat containing, nuclear envelope 1, transcript variant longer             | <a href="#">NM_033071</a>    | 2.42 |   |
| SYNPR   | Synaptoporin                                                                          | <a href="#">NM_144642</a>    | 2.43 |   |
| TAB3    | TAK1-binding protein 3, transcript variant 2                                          | <a href="#">NM_198312</a>    | 1.92 |   |
| TAB3    | TAK1-binding protein 3, transcript variant 1                                          | <a href="#">NM_152787</a>    | 1.92 |   |
| TAF5    | TAF5 RNA polymerase II, TATA box binding protein (TBP)-associated factor, 100 kDa     | <a href="#">NM_006951</a>    | 2.08 |   |
| TAF9L   | TAF9-like RNA polymerase II, TATA box binding protein (TBP)-associated factor, 31 kDa | <a href="#">NM_015975</a>    | 2.4  |   |
| TARDBP  | TAR DNA binding protein                                                               | <a href="#">NM_007375</a>    | 5.03 |   |
| TARSH   | Target of Nesh-SH3                                                                    | <a href="#">NM_015429</a>    | 6.31 |   |
| TBC1D1  | TBC1 (tre-2/USP6, BUB2, cdc16) domain family, member 1                                | <a href="#">NM_015173</a>    | 2.69 |   |
| TBDN100 | Transcriptional coactivator tubedown-100, transcript variant 1                        | <a href="#">NM_057175</a>    | 0.89 |   |
| TCERG1  | Transcription elongation regulator 1                                                  | <a href="#">NM_006706</a>    | 5.41 |   |
| TMEM28  | Transmembrane protein 28                                                              | <a href="#">NM_015686</a>    | 2.16 |   |
| TNFSF11 | Tumor necrosis factor (ligand) superfamily, member 11, transcript variant 1           | <a href="#">NM_003701</a>    | 1.5  |   |
| TNFSF11 | Tumor necrosis factor (ligand) superfamily, member 11, transcript variant 2           | <a href="#">NM_033012</a>    | 1.5  |   |
| TOM1L1  | Target of myb1-like 1 (chicken)                                                       | <a href="#">NM_005486</a>    | 3.83 |   |
| TOX     | Thymus high mobility group box protein TOX                                            | <a href="#">NM_014729</a>    | 1.07 |   |
| TRIM2   | Tripartite motif-containing 2                                                         | <a href="#">NM_015271</a>    | 4.78 |   |
| TRIM39  | Tripartite motif-containing 39, transcript variant 2                                  | <a href="#">NM_172016</a>    | 2.29 |   |
| TRIM39  | Tripartite motif-containing 39, transcript variant 1                                  | <a href="#">NM_021253</a>    | 2.29 |   |

|         |                                                                                       |                           |      |  |
|---------|---------------------------------------------------------------------------------------|---------------------------|------|--|
| TRIM9   | Tripartite motif-containing 9, transcript variant 2                                   | <a href="#">NM_052978</a> | 2.73 |  |
| TULP4   | Tubby like protein 4, transcript variant 1                                            | <a href="#">NM_020245</a> | 2.38 |  |
| TXNDC7  | Thioredoxin domain containing 7 (protein disulfide isomerase)                         | <a href="#">NM_005742</a> | 2.23 |  |
| UBP1    | Upstream binding protein 1 (LBP-1a)                                                   | <a href="#">NM_014517</a> | 3.28 |  |
| USP33   | Ubiquitin specific protease 33, transcript variant 2                                  | <a href="#">NM_201624</a> | 1.6  |  |
| USP33   | Ubiquitin specific protease 33, transcript variant 1                                  | <a href="#">NM_015017</a> | 1.6  |  |
| VIK     | Vav-1 interacting Kruppel-like protein, transcript variant 1                          | <a href="#">NM_138494</a> | 4.11 |  |
| WDR20   | WD repeat domain 20, transcript variant 3                                             | <a href="#">NM_181308</a> | 2.25 |  |
| WDR20   | WD repeat domain 20, transcript variant 4                                             | <a href="#">NM_181302</a> | 2.25 |  |
| WDR20   | WD repeat domain 20, transcript variant 2                                             | <a href="#">NM_144574</a> | 2.25 |  |
| WDR37   | WD repeat domain 37                                                                   | <a href="#">NM_014023</a> | 4.68 |  |
| WNT11   | Wingless-type MMTV integration site family, member 11                                 | <a href="#">NM_004626</a> | 3.2  |  |
| WSB1    | WD repeat and SOCS box-containing 1, transcript variant 1                             | <a href="#">NM_015626</a> | 1.59 |  |
| WSB1    | WD repeat and SOCS box-containing 1, transcript variant 2                             | <a href="#">NM_134265</a> | 1.59 |  |
| WSB1    | WD repeat and SOCS box-containing 1, transcript variant 3                             | <a href="#">NM_134264</a> | 0.65 |  |
| YT521   | Splicing factor YT521-B                                                               | <a href="#">NM_133370</a> | 1.99 |  |
| YTHDF2  | YTH domain family, member 2                                                           | <a href="#">NM_016258</a> | 1.91 |  |
| YTHDF3  | YTH domain family, member 3                                                           | <a href="#">NM_152758</a> | 5.73 |  |
| YWHAG   | Tyrosine 3-monooxygenase/tryptophan 5-monooxygenase activation protein, g polypeptide | <a href="#">NM_012479</a> | 2.05 |  |
| ZA20D2  | Zinc finger, A20 domain containing 2                                                  | <a href="#">NM_006007</a> | 3.24 |  |
| ZA20D3  | Zinc finger, A20 domain containing 3                                                  | <a href="#">NM_019006</a> | 1.95 |  |
| ZBTB4   | Zinc finger and BTB domain containing 4                                               | <a href="#">NM_020899</a> | 8.24 |  |
| ZC3HDC6 | Zinc finger CCCH type domain containing 6                                             | <a href="#">NM_198581</a> | 1.21 |  |
| ZDHHC3  | Zinc finger, DHHC domain containing 3                                                 | <a href="#">NM_016598</a> | 2.11 |  |
| ZDHHC7  | Zinc finger, DHHC domain containing 7                                                 | <a href="#">NM_017740</a> | 1.96 |  |
| ZF      | HCF-binding transcription factor Zhangfei                                             | <a href="#">NM_021212</a> | 1.21 |  |
| ZFP36L1 | Zinc finger protein 36, C3H type-like 1                                               | <a href="#">NM_004926</a> | 1.77 |  |
| ZIC1    | Zic family member 1 (odd-paired homolog, Drosophila)                                  | <a href="#">NM_003412</a> | 2.02 |  |
| ZIC2    | Zic family member 2 (odd-paired homolog, Drosophila)                                  | <a href="#">NM_007129</a> | 5.97 |  |
| ZIC3    | Zic family member 3 heterotaxy 1 (odd-paired homolog, Drosophila)                     | <a href="#">NM_003413</a> | 1.05 |  |
| ZNF207  | Zinc finger protein 207                                                               | <a href="#">NM_003457</a> | 2.29 |  |
| ZNF281  | Zinc finger protein 281                                                               | <a href="#">NM_012482</a> | 2.16 |  |
| ZNF533  | Zinc finger protein 533                                                               | <a href="#">NM_152520</a> | 2.01 |  |

|        |                         |                           |      |  |
|--------|-------------------------|---------------------------|------|--|
| ZNF800 | Zinc finger protein 800 | <a href="#">NM_176814</a> | 1.44 |  |
|--------|-------------------------|---------------------------|------|--|

**Supplementary Table 11. Predicted targets of hsa-miR-181a-5p by MicroCosm Targets.**

| <b>Gene symbol</b> | <b>Full name</b>                                                                                                                                                                                                                                               | <b>Cancer gene</b> | <b>Score</b> | <b>Energy</b> | <b>P value</b> | <b>Length</b> | <b>Total sites</b> | <b>No. of cons species</b> | <b>No. miRNAs</b> |
|--------------------|----------------------------------------------------------------------------------------------------------------------------------------------------------------------------------------------------------------------------------------------------------------|--------------------|--------------|---------------|----------------|---------------|--------------------|----------------------------|-------------------|
| <b>ABI2</b>        | Abl interactor 2 (Abelson interactor 2) (Abi-2) (Abl-binding protein 3) (AblBP3) (Arg-binding protein 1) (ArgBP1)                                                                                                                                              |                    | 15.947       | -15.11        | 0.0001772      | 1000          | 22                 | 7                          | 32 [+]            |
| <b>ACSL1</b>       | Long-chain-fatty-acid--CoA ligase 1 (EC 6.2.1.3) (Long-chain acyl-CoA synthetase 1) (LACS 1) (Palmitoyl-CoA ligase 1) (Long-chain fatty acid CoA ligase 2) (Long-chain acyl-CoA synthetase 2) (LACS 2) (Acyl-CoA synthetase 1) (ACS1) (Palmitoyl-CoA ligase 2) |                    | 15.763       | -18.74        | 0.0146172      | 1529          | 6                  | 5                          | 7 [+]             |
| <b>ACTA2</b>       | Actin, aortic smooth muscle (Alpha-actin-2) (Cell growth-inhibiting gene 46 protein)                                                                                                                                                                           |                    | 17.988       | -12.29        | 0.00642642     | 149           | 8                  | 6                          | 33 [+]            |
| <b>ACTA2</b>       | Actin, aortic smooth muscle (Alpha-actin-2) (Cell growth-inhibiting gene 46 protein)                                                                                                                                                                           |                    | 17.988       | -12.29        | 0.00818827     | 108           | 4                  | 1                          | 12 [+]            |
| <b>ACTG1</b>       | Actin, cytoplasmic 2 (Gamma-actin)                                                                                                                                                                                                                             |                    | 16.29        | -18           | 0.0404966      | 717           | 22                 | 6                          | 43 [+]            |
| <b>ACTN2</b>       | $\alpha$ -Actinin-2 (Alpha actinin skeletal muscle isoform 2) (F-actin cross-linking protein)                                                                                                                                                                  |                    | 15.314       | -18.96        | 0.00977434     | 2012          | 4                  | 2                          | 4 [+]             |
| <b>ACVRL1</b>      | Serine/threonine-protein kinase receptor R3 precursor (EC 2.7.11.30) (SKR3) (Activin receptor-like kinase 1) (ALK-1) (TGF-B superfamily receptor type I) (TSR-I)                                                                                               |                    | 16.178       | -17.78        | 0.0449427      | 176           | 8                  | 4                          | 42 [+]            |

|                 |                                                                                                                                                                   |        |        |            |      |    |   |        |
|-----------------|-------------------------------------------------------------------------------------------------------------------------------------------------------------------|--------|--------|------------|------|----|---|--------|
| <b>ACYPI</b>    | Acylphosphatase-1 (EC 3.6.1.7)<br>(Acylphosphate phosphohydrolase 1)<br>(Acylphosphatase, organ-common<br>type isozyme) (Acylphosphatase,<br>erythrocyte isozyme) | 18.327 | -15.47 | 0.00108159 | 217  | 12 | 5 | 49 [+] |
| <b>ADA</b>      | Adenosine deaminase (EC 3.5.4.4)<br>(Adenosine aminohydrolase)                                                                                                    | 15.994 | -15.6  | 0.00416595 | 312  | 18 | 8 | 53 [+] |
| <b>ADAMTS18</b> | ADAMTS-18 precursor (EC 3.4.24.-)<br>(A disintegrin and metalloproteinase<br>with thrombospondin motifs 18)<br>(ADAM-TS 18) (ADAM-TS18)                           | 15.322 | -14.05 | 0.00885784 | 1425 | 14 | 7 | 20 [+] |
| <b>ADAMTS6</b>  | ADAMTS-6 precursor (EC 3.4.24.-)<br>(A disintegrin and metalloproteinase<br>with thrombospondin motifs 6)<br>(ADAM-TS 6) (ADAM-TS6)                               | 16.065 | -14.8  | 0.048693   | 244  | 13 | 1 | 41 [+] |
| <b>ADCK1</b>    | Uncharacterized aarF domain-<br>containing protein kinase 1 precursor<br>(EC 2.7.-.-)                                                                             | 15.851 | -16.18 | 3.24E-05   | 560  | 23 | 4 | 61 [+] |
| <b>ADMR</b>     | Adrenomedullin receptor (AM-R)                                                                                                                                    | 16.065 | -11    | 0.0499184  | 260  | 14 | 3 | 63 [+] |
| <b>ADORA2B</b>  | Adenosine A <sub>2b</sub> receptor.<br>[Source:Uniprot/SWISSPROT;Acc:P<br>29275]                                                                                  | 15.763 | -18.82 | 0.00017062 | 554  | 18 | 5 | 58 [+] |
| <b>ADORA3</b>   | Adenosine A <sub>3</sub> receptor.<br>[Source:Uniprot/SWISSPROT;Acc:P<br>33765]                                                                                   | 18.089 | -21.07 | 0.00743839 | 337  | 14 | 1 | 34 [+] |
| <b>ADORA3</b>   | Adenosine A <sub>3</sub> receptor.<br>[Source:Uniprot/SWISSPROT;Acc:P<br>33765]                                                                                   | 18.077 | -21.87 | 0.00752305 | 339  | 14 | 1 | 34 [+] |



|               |                                                                                                                                                                                                          |  |        |        |            |     |    |   |        |
|---------------|----------------------------------------------------------------------------------------------------------------------------------------------------------------------------------------------------------|--|--------|--------|------------|-----|----|---|--------|
| <b>ADORA3</b> | Adenosine A3 receptor.<br>[Source:Uniprot/SWISSPROT;Acc:P33765]                                                                                                                                          |  | 17.402 | -21.07 | 0.0142515  | 480 | 12 | 1 | 21 [+] |
| <b>ADRA1A</b> | A <sub>1α</sub> -Adrenergic receptor (Alpha 1A-adrenoceptor) (Alpha 1A-adrenoreceptor) (Alpha-1C adrenergic receptor) (Alpha adrenergic receptor 1c).<br>[Source:Uniprot/SWISSPROT;Acc:P35348]           |  | 16.053 | -19.29 | 0.0492142  | 467 | 14 | 1 | 22 [+] |
| <b>AGT</b>    | Angiotensinogen precursor (Serpine A8) [Contains: Angiotensin-1 (Angiotensin I) (Ang I); Angiotensin-2 (Angiotensin II) (Ang II); Angiotensin-3 (Angiotensin III) (Ang III) (Des-Asp[1]-angiotensin II)] |  | 16.315 | -13.8  | 0.0395694  | 618 | 21 | 5 | 35 [+] |
| <b>AIFM1</b>  | Apoptosis-inducing factor 1, mitochondrial precursor (EC 1.-.-.-) (Programmed cell death protein 8)                                                                                                      |  | 15.725 | -14.05 | 0.0152111  | 195 | 10 | 7 | 44 [+] |
| <b>AIM1L</b>  | Absent in melanoma 1-like                                                                                                                                                                                |  | 17.649 | -13.34 | 0.01129    | 229 | 13 | 1 | 47 [+] |
| <b>AIM1L</b>  | Absent in melanoma 1-like                                                                                                                                                                                |  | 17.649 | -13.34 | 0.01129    | 91  | 4  | 1 | 20 [+] |
| <b>AKAP4</b>  | A-kinase anchor protein 4 precursor (Protein kinase A-anchoring protein 4) (PRKA4) (A-kinase anchor protein 82 kDa) (AKAP 82) (hAKAP82) (Major sperm fibrous sheath protein) (HI)                        |  | 16.97  | -13.37 | 0.00257364 | 197 | 10 | 6 | 37 [+] |

|                 |                                                                                                                                                                                                                                                                 |  |        |        |            |      |    |   |        |
|-----------------|-----------------------------------------------------------------------------------------------------------------------------------------------------------------------------------------------------------------------------------------------------------------|--|--------|--------|------------|------|----|---|--------|
| <b>AKAP4</b>    | A-kinase anchor protein 4 precursor (Protein kinase A-anchoring protein 4) (PRKA4) (A-kinase anchor protein 82 kDa) (AKAP 82) (hAKAP82) (Major sperm fibrous sheath protein) (HI)                                                                               |  | 16.97  | -13.37 | 0.0214202  | 183  | 9  | 1 | 24 [+] |
| <b>AKAP9</b>    | A-kinase anchor protein 9 (Protein kinase A-anchoring protein 9) (PRKA9) (A-kinase anchor protein 450 kDa) (AKAP 450) (A-kinase anchor protein 350 kDa) (AKAP 350) (hgAKAP 350) (AKAP 120-like protein) (Protein hyperion) (Protein yotiao) (Centrosome- and Go |  | 16.735 | -12.86 | 0.0267082  | 516  | 18 | 1 | 32 [+] |
| <b>ALS2CR12</b> | Amyotrophic lateral sclerosis 2 chromosomal region candidate gene 12 protein                                                                                                                                                                                    |  | 16.293 | -14.91 | 0.0403657  | 383  | 21 | 4 | 53 [+] |
| <b>AMOT</b>     | Angiomotin                                                                                                                                                                                                                                                      |  | 15.732 | -24.81 | 8.72E-05   | 1000 | 13 | 3 | 16 [+] |
| <b>ANKRD10</b>  | Ankyrin repeat domain-containing protein 10                                                                                                                                                                                                                     |  | 17.694 | -18.18 | 0.0108157  | 647  | 13 | 1 | 18 [+] |
| <b>ANKRD22</b>  | Ankyrin repeat domain-containing protein 22.<br>[Source:Uniprot/SWISSPROT;Acc:Q5VYY1]                                                                                                                                                                           |  | 16.067 | -22.13 | 0.00295909 | 809  | 19 | 3 | 28 [+] |
| <b>ANXA6</b>    | Annexin A6 (Annexin VI) (Lipocortin VI) (P68) (P70) (Protein III) (Chromobindin-20) (67 kDa calelectrin) (Calphobindin-II) (CPB-II).<br>[Source:Uniprot/SWISSPROT;Acc:P08133]                                                                                   |  | 15.673 | -18.43 | 0.00494877 | 741  | 15 | 7 | 21 [+] |

|                |                                                                                                                                                                                                                                                                                                                   |  |        |        |            |      |    |   |        |
|----------------|-------------------------------------------------------------------------------------------------------------------------------------------------------------------------------------------------------------------------------------------------------------------------------------------------------------------|--|--------|--------|------------|------|----|---|--------|
| <b>AP2A2</b>   | AP-2 complex subunit alpha-2<br>(Adapter-related protein complex 2 alpha- 2 subunit) (Alpha-adaptin C)<br>(Adaptor protein complex AP-2 alpha-2 subunit) (Clathrin assembly protein complex 2 alpha-C large chain) (100 kDa coated vesicle protein C)<br>(Plasma membran<br>[Source:Uniprot/SWISSPROT;Acc:O94973] |  | 15.586 | -24.31 | 0.00951074 | 1615 | 12 | 4 | 12 [+] |
| <b>APBB1IP</b> | Amyloid beta A4 precursor protein-binding family B member 1-interacting protein (APBB1-interacting protein 1) (Rap1-GTP-interacting adapter molecule) (RIAM) (Proline-rich EVH1 ligand 1) (PREL-1) (Proline-rich protein 73) (Retinoic acid-responsive prolin<br>[Source:Uniprot/SWISSPROT;Acc:Q7Z5R6]            |  | 16.764 | -17.87 | 0.0182914  | 315  | 15 | 6 | 51 [+] |
| <b>APIP</b>    | APAF1-interacting protein.<br>[Source:Uniprot/SWISSPROT;Acc:Q96GX9]                                                                                                                                                                                                                                               |  | 16.461 | -20.74 | 0.0345263  | 419  | 16 | 3 | 33 [+] |
| <b>APOO</b>    | Apolipoprotein O precursor (Protein FAM121B).<br>[Source:Uniprot/SWISSPROT;Acc:Q9BUR5]                                                                                                                                                                                                                            |  | 18.214 | -13.69 | 0.00016631 | 289  | 12 | 3 | 41 [+] |
| <b>APOO</b>    | Apolipoprotein O precursor (Protein FAM121B).<br>[Source:Uniprot/SWISSPROT;Acc:Q9BUR5]                                                                                                                                                                                                                            |  | 18.214 | -13.69 | 0.00660821 | 278  | 12 | 1 | 33 [+] |

|                 |                                                                                                                                                                     |  |        |        |            |      |    |   |        |
|-----------------|---------------------------------------------------------------------------------------------------------------------------------------------------------------------|--|--------|--------|------------|------|----|---|--------|
| <b>AQP11</b>    | Aquaporin-11 (AQP-11).<br>[Source:Uniprot/SWISSPROT;Acc:Q8NBQ7]                                                                                                     |  | 15.725 | -16.54 | 0.0003342  | 269  | 17 | 6 | 80 [+] |
| <b>AQP9</b>     | Aquaporin-9 (AQP-9) (Small solute channel 1).<br>[Source:Uniprot/SWISSPROT;Acc:O43315]                                                                              |  | 16.13  | -22.94 | 0.00100693 | 1775 | 12 | 5 | 12 [+] |
| <b>AQR</b>      | Intron-binding protein aquarius (Intron-binding protein of 160 kDa) (IBP160).<br>[Source:Uniprot/SWISSPROT;Acc:O60306]                                              |  | 16.59  | -13.87 | 0.00045265 | 440  | 18 | 4 | 43 [+] |
| <b>ARD1A</b>    | N-terminal acetyltransferase complex ARD1 subunit homolog A (EC 2.3.1.88) (EC 2.3.1.-).<br>[Source:Uniprot/SWISSPROT;Acc:P41227]                                    |  | 16.515 | -17.62 | 0.00384449 | 745  | 21 | 3 | 31 [+] |
| <b>ARHGAP19</b> | Slit homolog 1 protein precursor (Slit-1) (Multiple epidermal growth factor-like domains 4).<br>[Source:Uniprot/SWISSPROT;Acc:O75093]                               |  | 16.291 | -12.79 | 0.0404523  | 219  | 6  | 1 | 21 [+] |
| <b>ARL17P1</b>  | ADP-ribosylation factor-like protein 17 (ADP-ribosylation factor 7 variant).<br>[Source:Uniprot/SWISSPROT;Acc:Q8IVW1]                                               |  | 16.428 | -9.94  | 0.00341181 | 647  | 13 | 1 | 21 [+] |
| <b>ARMCX2</b>   | Armadillo repeat-containing X-linked protein 2 (Protein ALEX2) (ARM protein lost in epithelial cancers on chromosome X 2).<br>[Source:Uniprot/SWISSPROT;Acc:Q7L311] |  | 16.198 | -16.74 | 0.00448938 | 404  | 19 | 1 | 44 [+] |

|               |                                                                                                                                                                     |  |        |        |            |      |    |   |        |
|---------------|---------------------------------------------------------------------------------------------------------------------------------------------------------------------|--|--------|--------|------------|------|----|---|--------|
| <b>ARMCX2</b> | Armadillo repeat-containing X-linked protein 2 (Protein ALEX2) (ARM protein lost in epithelial cancers on chromosome X 2).<br>[Source:Uniprot/SWISSPROT;Acc:Q7L311] |  | 16.176 | -16.74 | 0.00465265 | 409  | 20 | 5 | 61 [+] |
| <b>ARNT2</b>  | Aryl hydrocarbon receptor nuclear translocator 2 (ARNT protein 2).<br>[Source:Uniprot/SWISSPROT;Acc:Q9HBZ2]                                                         |  | 16.065 | -12.65 | 0.0499206  | 1000 | 15 | 1 | 20 [+] |
| <b>ARPC1A</b> | Actin-related protein 2/3 complex subunit 1A (SOP2-like protein).<br>[Source:Uniprot/SWISSPROT;Acc:Q92747]                                                          |  | 17.309 | -8.23  | 0.00533873 | 333  | 18 | 6 | 54 [+] |
| <b>ARPC1B</b> | Actin-related protein 2/3 complex subunit 1B (ARP2/3 complex 41 kDa subunit) (p41-ARC).<br>[Source:Uniprot/SWISSPROT;Acc:O15143]                                    |  | 17.083 | -13.26 | 0.00117999 | 287  | 15 | 7 | 69 [+] |
| <b>ARRB2</b>  | $\beta$ -Arrestin-2 (Arrestin beta 2).<br>[Source:Uniprot/SWISSPROT;Acc:P32121]                                                                                     |  | 15.536 | -12.03 | 0.0148215  | 461  | 17 | 3 | 35 [+] |
| <b>ARSJ</b>   | Arylsulfatase family, member J (ARSJ), mRNA<br>[Source:RefSeq_dna;Acc:NM_024590]                                                                                    |  | 16.172 | -14.96 | 1.02E-05   | 1000 | 17 | 4 | 22 [+] |
| <b>ASB9</b>   | Ankyrin repeat and SOCS box protein 9 (ASB-9).<br>[Source:Uniprot/SWISSPROT;Acc:Q96DX5]                                                                             |  | 15.872 | -10.66 | 0.00347314 | 519  | 18 | 4 | 39 [+] |

|               |                                                                                                                                                                                  |  |        |        |            |      |    |   |        |
|---------------|----------------------------------------------------------------------------------------------------------------------------------------------------------------------------------|--|--------|--------|------------|------|----|---|--------|
| <b>ATG10</b>  | Autophagy-related protein 10 (APG10-like).<br>[Source:Uniprot/SWISSPROT;Acc:Q9H0Y0]                                                                                              |  | 16.38  | -17.11 | 0.0372146  | 886  | 12 | 1 | 20 [+] |
| <b>ATG5</b>   | Autophagy protein 5 (APG5-like) (Apoptosis-specific protein).<br>[Source:Uniprot/SWISSPROT;Acc:Q9H1Y0]                                                                           |  | 15.602 | -17.27 | 4.94E-05   | 2064 | 9  | 2 | 8 [+]  |
| <b>ATG5</b>   | Autophagy protein 5 (APG5-like) (Apoptosis-specific protein).<br>[Source:Uniprot/SWISSPROT;Acc:Q9H1Y0]                                                                           |  | 15.49  | -17.27 | 0.00342499 | 2231 | 5  | 1 | 4 [+]  |
| <b>ATP11C</b> | Probable phospholipid-transporting ATPase IG (EC 3.6.3.1) (ATPase class I type 11C) (ATPase IG) (ATPase IQ) (ATPase class VI type 11C).<br>[Source:Uniprot/SWISSPROT;Acc:Q8NB49] |  | 16.565 | -12.07 | 0.0308263  | 1000 | 9  | 1 | 12 [+] |
| <b>ATP1B2</b> | Sodium/potassium-transporting ATPase subunit beta-2 (Sodium/potassium- dependent ATPase beta-2 subunit).<br>[Source:Uniprot/SWISSPROT;Acc:P14415]                                |  | 15.666 | -13.02 | 0.018542   | 1874 | 7  | 2 | 5 [+]  |
| <b>ATP5J</b>  | ATP synthase coupling factor 6, mitochondrial precursor (EC 3.6.3.14) (ATPase subunit F6).<br>[Source:Uniprot/SWISSPROT;Acc:P18859]                                              |  | 17.875 | -18.3  | 0.00911416 | 159  | 10 | 2 | 34 [+] |

|                |                                                                                                                                                                                                                                                                                            |  |        |        |            |      |    |   |        |
|----------------|--------------------------------------------------------------------------------------------------------------------------------------------------------------------------------------------------------------------------------------------------------------------------------------------|--|--------|--------|------------|------|----|---|--------|
| <b>ATPAF2</b>  | ATP synthase mitochondrial F1 complex assembly factor 2, mitochondrial precursor (ATP12 homolog).<br>[Source:Uniprot/SWISSPROT;Acc:Q8N5M1]                                                                                                                                                 |  | 16.957 | -21.97 | 0.021674   | 484  | 25 | 5 | 60 [+] |
| <b>AUTS2</b>   | Autism susceptibility gene 2 protein.<br>[Source:Uniprot/SWISSPROT;Acc:Q8WXX7]                                                                                                                                                                                                             |  | 15.944 | -12.69 | 0.00242828 | 1000 | 24 | 7 | 30 [+] |
| <b>AYTL1</b>   | Acyltransferase-like 1 (EC 2.3.1.-).<br>[Source:Uniprot/SWISSPROT;Acc:Q7L5N7]                                                                                                                                                                                                              |  | 15.612 | -12.93 | 0.00027272 | 139  | 8  | 5 | 32 [+] |
| <b>B3GALT5</b> | $\beta$ -1,3-Galactosyltransferase 5 (EC 2.4.1.-) (Beta-1,3-GalTase 5) (Beta3Gal-T5) (b3Gal-T5) (UDP-galactose:beta-N-acetylglucosamine beta- 1,3-galactosyltransferase 5) (UDP-Gal:beta-GlcNAc beta-1,3-galactosyltransferase 5) (Beta-3-Gx-T5).<br>[Source:Uniprot/SWISSPROT;Acc:Q9Y2C3] |  | 15.943 | -19.78 | 0.00243292 | 1397 | 15 | 3 | 18 [+] |
| <b>B3GALT5</b> | $\beta$ 1,3-Galactosyltransferase 5 (EC 2.4.1.-) (Beta-1,3-GalTase 5) (Beta3Gal-T5) (b3Gal-T5) (UDP-galactose:beta-N-acetylglucosamine beta- 1,3-galactosyltransferase 5) (UDP-Gal:beta-GlcNAc beta-1,3-galactosyltransferase 5) (Beta-3-Gx-T5).<br>[Source:Uniprot/SWISSPROT;Acc:Q9Y2C3]  |  | 15.944 | -19.78 | 0.00248532 | 1396 | 11 | 1 | 13 [+] |

|               |                                                                                                                                                                                               |  |        |        |            |      |    |    |        |
|---------------|-----------------------------------------------------------------------------------------------------------------------------------------------------------------------------------------------|--|--------|--------|------------|------|----|----|--------|
| <b>BAI3</b>   | Brain-specific angiogenesis inhibitor 3 precursor.<br>[Source:Uniprot/SWISSPROT;Acc:O60242]                                                                                                   |  | 15.473 | -11    | 0.00040377 | 620  | 22 | 10 | 53 [+] |
| <b>BARD1</b>  | BRCA1-associated RING domain protein 1 (BARD-1).<br>[Source:Uniprot/SWISSPROT;Acc:Q99728]                                                                                                     |  | 16.178 | -13.5  | 0.00715141 | 106  | 6  | 6  | 27 [+] |
| <b>BBS9</b>   | Protein PTHB1 (Parathyroid hormone-responsive B1 gene protein) (Bardet-Biedl syndrome 9 protein).<br>[Source:Uniprot/SWISSPROT;Acc:Q3SYG4]                                                    |  | 17.222 | -19.54 | 0.00673739 | 842  | 21 | 4  | 30 [+] |
| <b>BCHE</b>   | Cholinesterase precursor (EC 3.1.1.8) (Acylcholine acylhydrolase) (Choline esterase II) (Butyrylcholine esterase) (Pseudocholinesterase).<br>[Source:Uniprot/SWISSPROT;Acc:P06276]            |  | 16.016 | -10.67 | 0.00669823 | 477  | 20 | 4  | 30 [+] |
| <b>BCL11A</b> | B-cell lymphoma/leukemia 11A (B-cell CLL/lymphoma 11A) (COUP-TF-interacting protein 1) (Ecotropic viral integration site 9 protein homolog) (EVI-9).<br>[Source:Uniprot/SWISSPROT;Acc:Q9H165] |  | 16.614 | -25.7  | 0.0299045  | 1000 | 8  | 1  | 12 [+] |
| <b>BDKRB1</b> | B1 bradykinin receptor (BK-1 receptor) (B1R).<br>[Source:Uniprot/SWISSPROT;Acc:P46663]                                                                                                        |  | 16.31  | -16.27 | 0.00284635 | 1000 | 19 | 3  | 23 [+] |



|               |                                                                                                                                                                                                   |        |        |            |      |    |   |        |
|---------------|---------------------------------------------------------------------------------------------------------------------------------------------------------------------------------------------------|--------|--------|------------|------|----|---|--------|
| <b>BEX2</b>   | Protein BEX2 (Brain-expressed X-linked protein 2) (hBex2).<br>[Source:Uniprot/SWISSPROT;Acc:Q9BXY8]                                                                                               | 16.63  | -13.19 | 0.0294592  | 244  | 13 | 3 | 42 [+] |
| <b>BMS1</b>   | Ribosome biogenesis protein BMS1 homolog.<br>[Source:Uniprot/SWISSPROT;Acc:Q14692]                                                                                                                | 15.768 | -19.07 | 0.00034599 | 312  | 18 | 6 | 64 [+] |
| <b>BRAP</b>   | BRCA1-associated protein (EC 6.3.2.-) (BRAP2) (Impedes mitogenic signal propagation) (IMP) (RING finger protein 52) (Renal carcinoma antigen NY-REN-63).<br>[Source:Uniprot/SWISSPROT;Acc:Q7Z569] | 15.491 | -11.99 | 0.00657215 | 505  | 21 | 6 | 53 [+] |
| <b>BRD1</b>   | Bromodomain-containing protein 1 (BR140-like protein).<br>[Source:Uniprot/SWISSPROT;Acc:O95696]                                                                                                   | 15.814 | -16.96 | 3.33E-05   | 949  | 22 | 5 | 36 [+] |
| <b>BRD7</b>   | Bromodomain-containing protein 7 (75 kDa bromodomain protein) (Protein CELTIX-1).<br>[Source:Uniprot/SWISSPROT;Acc:Q9NPI1]                                                                        | 17.083 | -20.47 | 0.0168063  | 173  | 10 | 6 | 35 [+] |
| <b>BRWD1</b>  | Bromodomain and WD repeat domain-containing protein 1 (WD repeat protein 9).<br>[Source:Uniprot/SWISSPROT;Acc:Q9NSI6]                                                                             | 16.185 | -16.13 | 0.0446593  | 1548 | 3  | 1 | 3 [+]  |
| <b>BTBD10</b> | BTB/POZ domain-containing protein 10.<br>[Source:Uniprot/SWISSPROT;Acc:Q9BSF8]                                                                                                                    | 16.499 | -18.48 | 0.0333162  | 817  | 21 | 4 | 27 [+] |

|                  |                                                                                                                                             |  |        |        |            |      |    |   |        |
|------------------|---------------------------------------------------------------------------------------------------------------------------------------------|--|--------|--------|------------|------|----|---|--------|
| <b>BTLA</b>      | B- and T-lymphocyte attenuator precursor (B- and T-lymphocyte-associated protein) (CD272 antigen).<br>[Source:Uniprot/SWISSPROT;Acc:Q7Z6A9] |  | 16.178 | -16.27 | 0.0439477  | 181  | 10 | 3 | 38 [+] |
| <b>BTN3A3</b>    | Butyrophilin subfamily 3 member A3 precursor.<br>[Source:Uniprot/SWISSPROT;Acc:O00478]                                                      |  | 16.138 | -20.54 | 0.0466225  | 1003 | 10 | 1 | 11 [+] |
| <b>BTN3A3</b>    | Butyrophilin subfamily 3 member A3 precursor.<br>[Source:Uniprot/SWISSPROT;Acc:O00478]                                                      |  | 16.125 | -20.54 | 0.0471826  | 1011 | 10 | 1 | 11 [+] |
| <b>BUD13</b>     | BUD13 homolog<br>[Source:RefSeq_peptide;Acc:NP_116114]                                                                                      |  | 16.178 | -16.42 | 0.00148543 | 312  | 16 | 6 | 96 [+] |
| <b>BUD13</b>     | BUD13 homolog<br>[Source:RefSeq_peptide;Acc:NP_116114]                                                                                      |  | 16.178 | -16.42 | 0.0449427  | 305  | 14 | 1 | 61 [+] |
| <b>C10orf128</b> | Novel protein.<br>[Source:Uniprot/SPTREMBL;Acc:Q5T291]                                                                                      |  | 16.827 | -15.12 | 0.0244905  | 1000 | 5  | 1 | 7 [+]  |
| <b>C10orf128</b> | Novel protein.<br>[Source:Uniprot/SPTREMBL;Acc:Q5T291]                                                                                      |  | 16.239 | -15.12 | 0.0424655  | 1530 | 6  | 1 | 6 [+]  |
| <b>C10orf61</b>  | Tectonic-3 precursor.<br>[Source:Uniprot/SWISSPROT;Acc:Q6NUS6]                                                                              |  | 15.922 | -18.04 | 0.0136914  | 648  | 19 | 5 | 35 [+] |
| <b>C10orf68</b>  | Coiled-coil domain-containing protein 7.<br>[Source:Uniprot/SWISSPROT;Acc:Q96M83]                                                           |  | 16.753 | -20.83 | 0.00557244 | 357  | 19 | 3 | 48 [+] |

|                 |                                                                                      |  |        |        |            |      |    |   |        |
|-----------------|--------------------------------------------------------------------------------------|--|--------|--------|------------|------|----|---|--------|
| <b>C10orf68</b> | Coiled-coil domain-containing protein 7.<br>[Source:Uniprot/SWISSPROT;Acc:Q96M83]    |  | 16.692 | -20.83 | 0.0274234  | 369  | 18 | 1 | 39 [+] |
| <b>C10orf73</b> | Uncharacterized protein C10orf73 (Fragment).<br>[Source:Uniprot/SPTREMBL;Acc:Q86WY6] |  | 16.646 | -18.44 | 0.0240795  | 453  | 18 | 4 | 42 [+] |
| <b>C10orf73</b> | Uncharacterized protein C10orf73 (Fragment).<br>[Source:Uniprot/SPTREMBL;Acc:Q86WY6] |  | 16.623 | -18.44 | 0.0296755  | 459  | 18 | 1 | 30 [+] |
| <b>C10orf78</b> | Uncharacterized protein C10orf78.<br>[Source:Uniprot/SWISSPROT;Acc:Q86XK3]           |  | 16.092 | -10.79 | 0.00039442 | 678  | 16 | 3 | 28 [+] |
| <b>C10orf78</b> | Uncharacterized protein C10orf78.<br>[Source:Uniprot/SWISSPROT;Acc:Q86XK3]           |  | 16.084 | -10.79 | 0.0490222  | 681  | 10 | 1 | 16 [+] |
| <b>C10orf79</b> | Novel protein.<br>[Source:Uniprot/SPTREMBL;Acc:Q5TA04]                               |  | 15.386 | -11.19 | 0.0078167  | 250  | 15 | 5 | 49 [+] |
| <b>C10orf90</b> | Uncharacterized protein C10orf90.<br>[Source:Uniprot/SWISSPROT;Acc:Q96M02]           |  | 16.065 | -19.85 | 0.048693   | 125  | 6  | 1 | 23 [+] |
| <b>C11orf56</b> | Uncharacterized protein C11orf56.<br>[Source:Uniprot/SWISSPROT;Acc:Q8N612]           |  | 17.083 | -15.94 | 0.00108592 | 159  | 10 | 7 | 38 [+] |
| <b>C11orf69</b> | Uncharacterized protein C11orf69.<br>[Source:Uniprot/SWISSPROT;Acc:Q8TAY4]           |  | 16.853 | -16.51 | 0.0239165  | 1185 | 10 | 2 | 10 [+] |

|                  |                                                                                                                                                                         |  |        |        |            |      |    |   |        |
|------------------|-------------------------------------------------------------------------------------------------------------------------------------------------------------------------|--|--------|--------|------------|------|----|---|--------|
| <b>C11orf75</b>  | Uncharacterized protein C11orf75 (Protein FN5).<br>[Source:Uniprot/SWISSPROT;Acc:Q9NRQ5]                                                                                |  | 15.31  | -9.63  | 0.0388469  | 535  | 15 | 2 | 24 [+] |
| <b>C12orf51</b>  | Uncharacterized protein C12orf51.<br>[Source:Uniprot/SPTREMBL;Acc:Q3MJD5]                                                                                               |  | 15.314 | -13.12 | 0.00084536 | 571  | 23 | 3 | 39 [+] |
| <b>C12orf52</b>  | CDNA FLJ14827 fis, clone OVARC1000886 (Chromosome 12 open reading frame 52) (CDNA PSEC0043 fis, clone NT2RP1001002).<br>[Source:Uniprot/SPTREMBL;Acc:Q96K30]            |  | 16.812 | -20.17 | 0.0248489  | 1000 | 10 | 1 | 14 [+] |
| <b>C12orf56</b>  | Uncharacterized protein C12orf56 (Fragment).<br>[Source:Uniprot/SPTREMBL;Acc:Q8IXR9]                                                                                    |  | 16.97  | -13.59 | 0.0078384  | 196  | 9  | 4 | 23 [+] |
| <b>C14orf135</b> | Uncharacterized protein C14orf135 precursor (Hepatitis C virus F protein-binding protein 2) (HCV F protein-binding protein 2).<br>[Source:Uniprot/SWISSPROT;Acc:Q63HM2] |  | 15.349 | -11.54 | 0.00093684 | 588  | 21 | 5 | 39 [+] |
| <b>C14orf178</b> | Uncharacterized protein C14orf178.<br>[Source:Uniprot/SWISSPROT;Acc:Q8N769]                                                                                             |  | 15.838 | -7.63  | 0.00878438 | 64   | 5  | 2 | 9 [+]  |
| <b>C15orf44</b>  | Uncharacterized protein C15orf44.<br>[Source:Uniprot/SPTREMBL;Acc:Q96HX5]                                                                                               |  | 15.376 | -14.73 | 0.0100966  | 626  | 25 | 5 | 40 [+] |

|                 |                                                                                                                |  |        |        |            |     |    |   |        |
|-----------------|----------------------------------------------------------------------------------------------------------------|--|--------|--------|------------|-----|----|---|--------|
| <b>C15orf48</b> | Normal mucosa of esophagus-specific gene 1 protein (Protein FOAP-11).<br>[Source:Uniprot/SWISSPROT;Acc:Q9C002] |  | 16.845 | -10.83 | 0.0240874  | 431 | 18 | 9 | 48 [+] |
| <b>C16orf53</b> | Uncharacterized protein C16orf53.<br>[Source:Uniprot/SWISSPROT;Acc:Q9BTK6]                                     |  | 16.97  | -17.69 | 0.00694165 | 327 | 17 | 5 | 55 [+] |
| <b>C16orf75</b> | C16orf75 protein.<br>[Source:Uniprot/SPTREMBL;Acc:Q49AE2]                                                      |  | 17.001 | -16.73 | 0.00634222 | 973 | 19 | 4 | 20 [+] |
| <b>C16orf75</b> | C16orf75 protein.<br>[Source:Uniprot/SPTREMBL;Acc:Q49AE2]                                                      |  | 17.019 | -16.73 | 0.0204481  | 963 | 17 | 1 | 16 [+] |
| <b>C17orf45</b> | Uncharacterized protein C17orf45.<br>[Source:Uniprot/SPTREMBL;Acc:Q8N1F1]                                      |  | 16.065 | -12.88 | 0.048693   | 292 | 16 | 1 | 45 [+] |
| <b>C18orf34</b> | Uncharacterized protein C18orf34.<br>[Source:Uniprot/SWISSPROT;Acc:Q5BJE1]                                     |  | 16.857 | -12.06 | 0.016623   | 187 | 11 | 4 | 38 [+] |
| <b>C18orf55</b> | TIM21-like protein, mitochondrial precursor.<br>[Source:Uniprot/SWISSPROT;Acc:Q9BVV7]                          |  | 16.106 | -18.97 | 8.20E-06   | 482 | 19 | 5 | 43 [+] |
| <b>C19orf59</b> | Mast cell-expressed membrane protein 1.<br>[Source:Uniprot/SWISSPROT;Acc:Q8IX19]                               |  | 15.706 | -15.38 | 5.08E-06   | 708 | 23 | 4 | 45 [+] |
| <b>C1orf131</b> | C1orf131 protein (Fragment).<br>[Source:Uniprot/SPTREMBL;Acc:Q7Z6H5]                                           |  | 16.105 | -16.96 | 0.00283543 | 513 | 22 | 3 | 43 [+] |

|                 |                                                                                                                                                                                                          |  |        |        |            |      |    |   |        |
|-----------------|----------------------------------------------------------------------------------------------------------------------------------------------------------------------------------------------------------|--|--------|--------|------------|------|----|---|--------|
| <b>C1orf131</b> | C1orf131 protein (Fragment).<br>[Source:Uniprot/SPTREMBL;Acc:Q7Z6H5]                                                                                                                                     |  | 16.095 | -16.96 | 0.0473606  | 516  | 18 | 1 | 33 [+] |
| <b>C1orf134</b> | NOT ANNOTATED                                                                                                                                                                                            |  | 16.744 | -15.03 | 0.0264944  | 198  | 10 | 1 | 36 [+] |
| <b>C1orf149</b> | Uncharacterized protein C1orf149<br>(Sarcoma antigen NY-SAR-91).<br>[Source:Uniprot/SWISSPROT;Acc:Q9HAF1]                                                                                                |  | 16.107 | -18.47 | 0.0479867  | 1000 | 14 | 1 | 13 [+] |
| <b>C1orf156</b> | Uncharacterized protein C1orf156<br>(Arsenic-transactivated protein 2)<br>(AsTP2).<br>[Source:Uniprot/SWISSPROT;Acc:O95568]                                                                              |  | 15.92  | -15.19 | 0.00154016 | 1000 | 12 | 2 | 17 [+] |
| <b>C1orf165</b> | Coiled-coil domain-containing protein<br>C1orf165.<br>[Source:Uniprot/SWISSPROT;Acc:Q7L4P6]                                                                                                              |  | 17.165 | -18.85 | 0.00401598 | 363  | 20 | 6 | 63 [+] |
| <b>C1orf41</b>  | Placental protein 25 (PP25).<br>[Source:Uniprot/SWISSPROT;Acc:Q9Y547]                                                                                                                                    |  | 18.214 | -15.43 | 0.00660821 | 350  | 13 | 1 | 39 [+] |
| <b>C1orf43</b>  | Uncharacterized protein C1orf43<br>(Hepatitis C virus NS5A-<br>transactivated protein 4) (HCV NS5A-<br>transactivated protein 4) (Protein<br>NICE-3) (S863- 3).<br>[Source:Uniprot/SWISSPROT;Acc:Q9BWL3] |  | 15.412 | -11.5  | 0.00880062 | 733  | 17 | 3 | 22 [+] |
| <b>C1orf50</b>  | Uncharacterized protein C1orf50.<br>[Source:Uniprot/SWISSPROT;Acc:Q9BV19]                                                                                                                                |  | 16.584 | -13.61 | 0.00774131 | 347  | 15 | 4 | 54 [+] |
| <b>C1orf98</b>  | NOT ANNOTATED                                                                                                                                                                                            |  | 16.823 | -12.87 | 0.0246004  | 702  | 15 | 1 | 22 [+] |

|                  |                                                                                                                              |  |        |        |            |      |    |   |        |
|------------------|------------------------------------------------------------------------------------------------------------------------------|--|--------|--------|------------|------|----|---|--------|
| <b>C20orf107</b> | Uncharacterized protein C20orf106 precursor.<br>[Source:Uniprot/SWISSPROT;Acc:Q5JX71]                                        |  | 16.291 | -15.77 | 0.00854267 | 72   | 4  | 6 | 16 [+] |
| <b>C20orf107</b> | Uncharacterized protein C20orf106 precursor.<br>[Source:Uniprot/SWISSPROT;Acc:Q5JX71]                                        |  | 16.291 | -15.77 | 0.0404523  | 82   | 4  | 1 | 10 [+] |
| <b>C20orf29</b>  | Uncharacterized protein C20orf29.<br>[Source:Uniprot/SWISSPROT;Acc:Q9NUS5]                                                   |  | 15.443 | -14.95 | 0.00087129 | 1010 | 18 | 4 | 29 [+] |
| <b>C20orf51</b>  | Putative uncharacterized protein C20orf51.<br>[Source:Uniprot/SWISSPROT;Acc:Q9H493]                                          |  | 15.481 | -17.75 | 0.00344357 | 368  | 18 | 1 | 48 [+] |
| <b>C20orf69</b>  | Uncharacterized protein C20orf69 (Fragment).<br>[Source:Uniprot/SPTREMBL;Acc:Q9BZ41]                                         |  | 16.161 | -15.22 | 0.00249303 | 1000 | 12 | 2 | 14 [+] |
| <b>C20orf71</b>  | Short palate, lung and nasal epithelium carcinoma-associated protein 3 precursor.<br>[Source:Uniprot/SWISSPROT;Acc:Q9BQP9]   |  | 16.45  | -19.1  | 0.0348676  | 311  | 16 | 1 | 40 [+] |
| <b>C20orf94</b>  | Uncharacterized protein C20orf94.<br>[Source:Uniprot/SPTREMBL;Acc:Q5VYV7]                                                    |  | 16.156 | -16.29 | 0.0458542  | 1000 | 9  | 1 | 9 [+]  |
| <b>C21orf114</b> | Uncharacterized protein C21orf114 (B lymphocyte activation-related protein BC-2048).<br>[Source:Uniprot/SPTREMBL;Acc:Q96PM7] |  | 16.908 | -18.81 | 0.0226945  | 1000 | 5  | 1 | 5 [+]  |

|                 |                                                                                       |  |        |        |            |      |    |   |        |
|-----------------|---------------------------------------------------------------------------------------|--|--------|--------|------------|------|----|---|--------|
| <b>C21orf42</b> | Uncharacterized protein C21orf42.<br>[Source:Uniprot/SWISSPROT;Acc:P58513]            |  | 17.54  | -18.72 | 0.0125096  | 1000 | 3  | 1 | 3 [+]  |
| <b>C21orf66</b> | GC-rich sequence DNA-binding factor homolog.<br>[Source:Uniprot/SWISSPROT;Acc:Q9Y5B6] |  | 16.055 | -15.17 | 0.00302859 | 1048 | 11 | 1 | 11 [+] |
| <b>C21orf66</b> | GC-rich sequence DNA-binding factor homolog.<br>[Source:Uniprot/SWISSPROT;Acc:Q9Y5B6] |  | 16.051 | -15.17 | 0.00305243 | 1051 | 16 | 4 | 21 [+] |
| <b>C2orf29</b>  | Uncharacterized protein C2orf29.<br>[Source:Uniprot/SWISSPROT;Acc:Q9UKZ1]             |  | 16.038 | -15.83 | 0.00104676 | 901  | 18 | 5 | 24 [+] |
| <b>C3orf14</b>  | Uncharacterized protein C3orf14.<br>[Source:Uniprot/SWISSPROT;Acc:Q9HB15]             |  | 17.875 | -11.81 | 0.00911416 | 254  | 9  | 5 | 37 [+] |
| <b>C3orf23</b>  | Uncharacterized protein C3orf23.<br>[Source:Uniprot/SWISSPROT;Acc:Q8N3R3]             |  | 15.495 | -16.9  | 0.00108479 | 1763 | 8  | 4 | 7 [+]  |
| <b>C3orf32</b>  | Uncharacterized protein C3orf32.<br>[Source:Uniprot/SWISSPROT;Acc:Q9Y2M2]             |  | 16.265 | -19.27 | 0.00469239 | 468  | 24 | 4 | 52 [+] |
| <b>C3orf32</b>  | Uncharacterized protein C3orf32.<br>[Source:Uniprot/SWISSPROT;Acc:Q9Y2M2]             |  | 17.083 | -19.27 | 0.0192564  | 237  | 11 | 1 | 36 [+] |
| <b>C3orf59</b>  | Uncharacterized protein C3orf59.<br>[Source:Uniprot/SWISSPROT;Acc:Q8IYB1]             |  | 15.445 | -13.86 | 0.00416875 | 1568 | 9  | 6 | 11 [+] |
| <b>C3orf62</b>  | Uncharacterized protein C3orf62.<br>[Source:Uniprot/SWISSPROT;Acc:Q6ZUJ4]             |  | 15.409 | -19.31 | 0.00777902 | 2394 | 5  | 2 | 7 [+]  |



|                 |                                                                                            |  |        |        |            |      |    |   |        |
|-----------------|--------------------------------------------------------------------------------------------|--|--------|--------|------------|------|----|---|--------|
| <b>C5orf14</b>  | disulfide isomerase<br>[Source:RefSeq_peptide;Acc:NP_078991]                               |  | 17.309 | -13.34 | 1.60E-05   | 195  | 9  | 6 | 33 [+] |
| <b>C6orf117</b> | Uncharacterized protein C6orf117.<br>[Source:Uniprot/SWISSPROT;Acc:Q96G30]                 |  | 16.713 | -21.68 | 0.0145969  | 1399 | 16 | 3 | 22 [+] |
| <b>C6orf130</b> | Uncharacterized protein C6orf130.<br>[Source:Uniprot/SWISSPROT;Acc:Q9Y530]                 |  | 15.587 | -15.05 | 0.00839639 | 542  | 15 | 5 | 30 [+] |
| <b>C6orf148</b> | Uncharacterized protein C6orf148.<br>[Source:Uniprot/SPTREMBL;Acc:Q4VXA5]                  |  | 16.63  | -13.01 | 0.0294592  | 215  | 13 | 2 | 37 [+] |
| <b>C6orf157</b> | UBCH10 binding protein with a hect-like domain<br>[Source:RefSeq_peptide;Acc:NP_944602]    |  | 17.991 | -19.35 | 0.00263613 | 552  | 17 | 3 | 39 [+] |
| <b>C6orf157</b> | UBCH10 binding protein with a hect-like domain<br>[Source:RefSeq_peptide;Acc:NP_944602]    |  | 17.764 | -19.35 | 0.0101237  | 623  | 14 | 1 | 23 [+] |
| <b>C6orf159</b> | Uncharacterized protein C6orf159.<br>[Source:Uniprot/SPTREMBL;Acc:Q5TAB7]                  |  | 16.23  | -22.01 | 0.00437847 | 1000 | 20 | 4 | 22 [+] |
| <b>C6orf192</b> | OTTHUMP00000017233.<br>[Source:Uniprot/SPTREMBL;Acc:Q5TBJ2]                                |  | 16.065 | -20.34 | 0.0002103  | 902  | 22 | 5 | 29 [+] |
| <b>C6orf199</b> | Uncharacterized protein C6orf199.<br>[Source:Uniprot/SPTREMBL;Acc:Q5TCS8]                  |  | 16.49  | -13.72 | 0.0336049  | 1212 | 9  | 1 | 10 [+] |
| <b>C6orf54</b>  | Uncharacterized protein C6orf54 (Protein HGC6.1).<br>[Source:Uniprot/SWISSPROT;Acc:Q9Y6Z4] |  | 16.219 | -17.51 | 0.00281438 | 578  | 15 | 1 | 25 [+] |

|                 |                                                                                                                                                                                                         |        |        |            |     |    |   |        |
|-----------------|---------------------------------------------------------------------------------------------------------------------------------------------------------------------------------------------------------|--------|--------|------------|-----|----|---|--------|
| <b>C6orf98</b>  | Nesprin-1 (Nuclear envelope spectrin repeat protein 1) (Synaptic nuclear envelope protein 1) (Syne-1) (Myocyte nuclear envelope protein 1) (Myne-1) (Enaptin).<br>[Source:Uniprot/SWISSPROT;Acc:Q8NF91] | 16.234 | -15.32 | 0.0375238  | 656 | 18 | 5 | 29 [+] |
| <b>C8orf32</b>  | Uncharacterized protein C8orf32.<br>[Source:Uniprot/SWISSPROT;Acc:Q96HA8]                                                                                                                               | 16.351 | -16.57 | 2.65E-05   | 605 | 18 | 6 | 43 [+] |
| <b>C8orf45</b>  | Uncharacterized protein C8orf45.<br>[Source:Uniprot/SWISSPROT;Acc:Q4G0Z9]                                                                                                                               | 16.094 | -10.49 | 0.0485693  | 456 | 16 | 1 | 24 [+] |
| <b>C9orf11</b>  | Acr formation associated factor<br>[Source:RefSeq_peptide;Acc:NP_065692]                                                                                                                                | 16.857 | -8.67  | 0.0238243  | 258 | 13 | 1 | 29 [+] |
| <b>C9orf156</b> | Uncharacterized protein C9orf156 (Nef-associated protein 1).<br>[Source:Uniprot/SPTREMBL;Acc:Q5T113]                                                                                                    | 16.857 | -15.94 | 0.00080014 | 244 | 13 | 4 | 46 [+] |
| <b>C9orf156</b> | Uncharacterized protein C9orf156 (Nef-associated protein 1).<br>[Source:Uniprot/SPTREMBL;Acc:Q5T113]                                                                                                    | 16.857 | -15.94 | 0.0238243  | 199 | 11 | 1 | 33 [+] |
| <b>C9orf16</b>  | UPF0184 protein C9orf16 (EST00098).<br>[Source:Uniprot/SWISSPROT;Acc:Q9BUW7]                                                                                                                            | 17.114 | -19.73 | 0.00765003 | 313 | 17 | 4 | 54 [+] |
| <b>C9orf23</b>  | Alba-like protein C9orf23.<br>[Source:Uniprot/SWISSPROT;Acc:Q8N5L8]                                                                                                                                     | 16.628 | -16.86 | 0.00330457 | 319 | 18 | 3 | 75 [+] |

|                |                                                                                                                                                                           |        |        |            |     |    |   |        |
|----------------|---------------------------------------------------------------------------------------------------------------------------------------------------------------------------|--------|--------|------------|-----|----|---|--------|
| <b>C9orf32</b> | UPF0351 protein C9orf32.<br>[Source:Uniprot/SWISSPROT;Acc:Q9BV86]                                                                                                         | 15.841 | -24.75 | 0.00053534 | 466 | 15 | 3 | 37 [+] |
| <b>C9orf71</b> | Uncharacterized protein C9orf71.<br>[Source:Uniprot/SWISSPROT;Acc:Q8N6L7]                                                                                                 | 16.466 | -14.24 | 0.00709218 | 679 | 21 | 3 | 38 [+] |
| <b>C9orf97</b> | Uncharacterized protein C9orf97.<br>[Source:Uniprot/SWISSPROT;Acc:Q5T7W7]                                                                                                 | 16.293 | -13.32 | 0.0403858  | 626 | 18 | 1 | 29 [+] |
| <b>CA14</b>    | Carbonic anhydrase 14 precursor (EC 4.2.1.1) (Carbonic anhydrase XIV) (Carbonate dehydratase XIV) (CA-XIV).<br>[Source:Uniprot/SWISSPROT;Acc:Q9ULX7]                      | 15.589 | -12.39 | 0.00489758 | 419 | 18 | 6 | 44 [+] |
| <b>CA3</b>     | Carbonic anhydrase 3 (EC 4.2.1.1) (Carbonic anhydrase III) (Carbonate dehydratase III) (CA-III).<br>[Source:Uniprot/SWISSPROT;Acc:P07451]                                 | 15.712 | -17.51 | 0.0124444  | 892 | 16 | 5 | 21 [+] |
| <b>CABC1</b>   | Chaperone-activity of bc1 complex-like, mitochondrial precursor (Chaperone-ABC1-like) (aarF domain-containing protein kinase 3).<br>[Source:Uniprot/SWISSPROT;Acc:Q8NI60] | 16.887 | -27.7  | 0.00065172 | 808 | 21 | 3 | 29 [+] |
| <b>CABC1</b>   | Chaperone-activity of bc1 complex-like, mitochondrial precursor (Chaperone-ABC1-like) (aarF domain-containing protein kinase 3).<br>[Source:Uniprot/SWISSPROT;Acc:Q8NI60] | 16.889 | -27.7  | 0.0041655  | 807 | 15 | 1 | 16 [+] |

|                |                                                                                                                                                                |  |        |        |            |      |    |   |        |
|----------------|----------------------------------------------------------------------------------------------------------------------------------------------------------------|--|--------|--------|------------|------|----|---|--------|
| <b>CADPS</b>   | Calcium-dependent secretion activator 1 (Calcium-dependent activator protein for secretion 1) (CAPS-1).<br>[Source:Uniprot/SWISSPROT;Acc:Q9ULU8]               |  | 16.363 | -13.69 | 0.0371243  | 1295 | 7  | 1 | 7 [+]  |
| <b>CAGE1</b>   | Cancer-associated gene 1 protein (CAGE-1) (Cancer/testis antigen 3).<br>[Source:Uniprot/SWISSPROT;Acc:Q8TC20]                                                  |  | 16.375 | -9.6   | 0.0373949  | 674  | 12 | 1 | 14 [+] |
| <b>CALCA</b>   | Calcitonin gene-related peptide 1 precursor (Calcitonin gene-related peptide I) (CGRP-I) (Alpha-type CGRP).<br>[Source:Uniprot/SWISSPROT;Acc:P06881]           |  | 16.404 | -15.38 | 0.036402   | 295  | 16 | 1 | 46 [+] |
| <b>CALCRL</b>  | Calcitonin gene-related peptide type 1 receptor precursor (CGRP type 1 receptor) (Calcitonin receptor-like receptor).<br>[Source:Uniprot/SWISSPROT;Acc:Q16602] |  | 15.528 | -13.33 | 0.00063296 | 1079 | 18 | 5 | 20 [+] |
| <b>CAMSAP1</b> | calmodulin regulated spectrin-associated protein 1<br>[Source:RefSeq_peptide;Acc:NP_056262]                                                                    |  | 15.545 | -15.39 | 6.14E-05   | 1000 | 18 | 4 | 23 [+] |
| <b>CAPRIN2</b> | C1q domain containing 1 isoform 2<br>[Source:RefSeq_peptide;Acc:NP_076414]                                                                                     |  | 17.468 | -19.48 | 0.0133861  | 348  | 18 | 6 | 71 [+] |
| <b>CAPS2</b>   | Calcyphosin-2 (Calcyphosine-2).<br>[Source:Uniprot/SWISSPROT;Acc:Q9BXY5]                                                                                       |  | 16.291 | -15.49 | 0.00065518 | 263  | 13 | 2 | 46 [+] |

|               |                                                                                                                                                                                                                                                                           |  |        |        |           |      |    |   |        |
|---------------|---------------------------------------------------------------------------------------------------------------------------------------------------------------------------------------------------------------------------------------------------------------------------|--|--------|--------|-----------|------|----|---|--------|
| <b>CARD11</b> | Caspase recruitment domain-containing protein 11 (CARD-containing MAGUK protein 3) (Carma 1).<br>[Source:Uniprot/SWISSPROT;Acc:Q9BXL7]                                                                                                                                    |  | 17.153 | -23.2  | 1.16E-06  | 489  | 24 | 4 | 51 [+] |
| <b>CARM1</b>  | Histone-arginine methyltransferase CARM1 (EC 2.1.1.125) (EC 2.1.1.-) (Protein arginine N-methyltransferase 4) (Coactivator-associated arginine methyltransferase 1).<br>[Source:Uniprot/SWISSPROT;Acc:Q86X55]                                                             |  | 16.02  | -18.86 | 6.29E-06  | 1015 | 16 | 5 | 19 [+] |
| <b>CASP1</b>  | Caspase-1 precursor (EC 3.4.22.36) (CASP-1) (Interleukin-1 beta convertase) (IL-1BC) (IL-1 beta-converting enzyme) (ICE) (Interleukin- 1 beta-converting enzyme) (p45) [Contains: Caspase-1 p20 subunit; Caspase-1 p10 subunit].<br>[Source:Uniprot/SWISSPROT;Acc:P29466] |  | 16.97  | -10.46 | 0.0214202 | 112  | 7  | 2 | 17 [+] |

|                 |                                                                                                                                                                                                                                                                        |  |        |        |            |      |    |   |        |
|-----------------|------------------------------------------------------------------------------------------------------------------------------------------------------------------------------------------------------------------------------------------------------------------------|--|--------|--------|------------|------|----|---|--------|
| <b>CASP1</b>    | Caspase-1 precursor (EC 3.4.22.36) (CASP-1) (Interleukin-1 beta convertase) (IL-1BC) (IL-1 beta-converting enzyme) (ICE) (Interleukin- 1 beta-converting enzyme) (p45) [Contains: Caspase-1 p20 subunit; Caspase-1 p10 subunit]. [Source:Uniprot/SWISSPROT;Acc:P29466] |  | 16.97  | -10.46 | 0.0214202  | 60   | 3  | 1 | 8 [+]  |
| <b>CBX6</b>     | Chromobox protein homolog 6. [Source:Uniprot/SWISSPROT;Acc:O95503]                                                                                                                                                                                                     |  | 16.349 | -18.77 | 0.00307629 | 1000 | 15 | 4 | 19 [+] |
| <b>CCBL2</b>    | Kynurenine aminotransferase III isoform 1 [Source:RefSeq_peptide;Acc:NP_001008661]                                                                                                                                                                                     |  | 16.207 | -14.65 | 0.0437454  | 410  | 17 | 5 | 48 [+] |
| <b>CCDC102A</b> | Coiled-coil domain-containing protein 102A. [Source:Uniprot/SWISSPROT;Acc:Q96A19]                                                                                                                                                                                      |  | 16.166 | -10.86 | 0.0397759  | 558  | 18 | 6 | 40 [+] |
| <b>CCDC116</b>  | Coiled-coil domain-containing protein 116. [Source:Uniprot/SWISSPROT;Acc:Q8IYX3]                                                                                                                                                                                       |  | 16.404 | -20.67 | 0.00485271 | 256  | 14 | 3 | 56 [+] |
| <b>CCDC14</b>   | Coiled-coil domain containing 14 [Source:RefSeq_peptide;Acc:NP_073594]                                                                                                                                                                                                 |  | 16.201 | -16.9  | 0.0002217  | 1058 | 12 | 3 | 13 [+] |
| <b>CCDC28B</b>  | Coiled-coil domain-containing protein 28B. [Source:Uniprot/SWISSPROT;Acc:Q9BUN5]                                                                                                                                                                                       |  | 15.346 | -20.18 | 0.00137775 | 589  | 23 | 3 | 49 [+] |

|                |                                                                                                                         |  |        |        |            |      |    |   |        |
|----------------|-------------------------------------------------------------------------------------------------------------------------|--|--------|--------|------------|------|----|---|--------|
| <b>CCDC28B</b> | Coiled-coil domain-containing protein 28B.<br>[Source:Uniprot/SWISSPROT;Acc:Q9BUN5]                                     |  | 16.517 | -20.18 | 0.0322198  | 139  | 7  | 1 | 20 [+] |
| <b>CCDC38</b>  | Coiled-coil domain-containing protein 38.<br>[Source:Uniprot/SWISSPROT;Acc:Q502W7]                                      |  | 15.358 | -16.4  | 0.00037125 | 1000 | 12 | 2 | 13 [+] |
| <b>CCDC41</b>  | Coiled-coil domain-containing protein 41 (Renal carcinoma antigen NY- REN-58).<br>[Source:Uniprot/SWISSPROT;Acc:Q9Y592] |  | 17.393 | -12.92 | 0.01438    | 531  | 16 | 1 | 24 [+] |
| <b>CCDC42</b>  | Coiled-coil domain-containing protein 42.<br>[Source:Uniprot/SWISSPROT;Acc:Q96M95]                                      |  | 18.893 | -14.89 | 0.00347062 | 196  | 11 | 5 | 38 [+] |
| <b>CCDC44</b>  | Coiled-coil domain-containing protein 44.<br>[Source:Uniprot/SWISSPROT;Acc:Q9BSH4]                                      |  | 15.62  | -14.59 | 0.00879709 | 362  | 19 | 5 | 49 [+] |
| <b>CCDC45</b>  | Coiled-coil domain-containing protein 45.<br>[Source:Uniprot/SWISSPROT;Acc:Q96GE4]                                      |  | 15.499 | -9.97  | 0.00040783 | 163  | 10 | 6 | 33 [+] |
| <b>CCDC51</b>  | coiled-coil domain containing 51<br>[Source:RefSeq_peptide;Acc:NP_078937]                                               |  | 17.875 | -13.41 | 0.00409648 | 231  | 13 | 5 | 54 [+] |
| <b>CCDC55</b>  | Coiled-coil domain-containing protein 55.<br>[Source:Uniprot/SWISSPROT;Acc:Q9H0G5]                                      |  | 15.802 | -18.45 | 8.71E-05   | 799  | 17 | 3 | 21 [+] |

|               |                                                                                                                                                                             |  |        |        |            |     |    |   |        |
|---------------|-----------------------------------------------------------------------------------------------------------------------------------------------------------------------------|--|--------|--------|------------|-----|----|---|--------|
| <b>CCDC60</b> | Coiled-coil domain-containing protein 60.<br>[Source:Uniprot/SWISSPROT;Acc:Q8IWA6]                                                                                          |  | 16.224 | -10.69 | 0.00227462 | 331 | 18 | 5 | 52 [+] |
| <b>CCDC62</b> | Coiled-coil domain-containing protein 60 (Aaa-protein) (Protein TSP- NY).<br>[Source:Uniprot/SWISSPROT;Acc:Q6P9F0]                                                          |  | 15.637 | -11.89 | 0.00719139 | 823 | 17 | 3 | 18 [+] |
| <b>CCDC75</b> | Coiled-coil domain-containing protein 75 (G patch domain-containing protein 11).<br>[Source:Uniprot/SWISSPROT;Acc:Q8N954]                                                   |  | 16.404 | -13.17 | 0.0357474  | 296 | 13 | 1 | 37 [+] |
| <b>CCDC81</b> | Coiled-coil domain containing 81<br>[Source:RefSeq_peptide;Acc:NP_068599]                                                                                                   |  | 15.698 | -18.53 | 0.00118362 | 393 | 18 | 5 | 57 [+] |
| <b>CCDC92</b> | Coiled-coil domain-containing protein 92 (Limkain beta-2).<br>[Source:Uniprot/SWISSPROT;Acc:Q53HC0]                                                                         |  | 15.677 | -15.86 | 0.00032635 | 622 | 19 | 7 | 39 [+] |
| <b>CCL11</b>  | Eotaxin precursor (Small inducible cytokine A11) (CCL11) (Eosinophil chemotactic protein).<br>[Source:Uniprot/SWISSPROT;Acc:P51671]                                         |  | 15.399 | -15.57 | 0.0331871  | 490 | 16 | 3 | 28 [+] |
| <b>CCL7</b>   | Small inducible cytokine A7 precursor (CCL7) (Monocyte chemotactic protein 3) (MCP-3) (Monocyte chemoattractant protein 3) (NC28).<br>[Source:Uniprot/SWISSPROT;Acc:P80098] |  | 16.378 | -14.48 | 0.00285201 | 439 | 23 | 5 | 52 [+] |



|                |                                                                                                                                                                                                  |  |        |        |            |     |    |   |        |
|----------------|--------------------------------------------------------------------------------------------------------------------------------------------------------------------------------------------------|--|--------|--------|------------|-----|----|---|--------|
| <b>CCL8</b>    | Small inducible cytokine A8 precursor (CCL8) (Monocyte chemotactic protein 2) (MCP-2) (Monocyte chemoattractant protein 2) (HC14) [Contains: MCP-2(6-76)]. [Source:Uniprot/SWISSPROT;Acc:P80075] |  | 16.005 | -11.72 | 0.0231895  | 494 | 19 | 4 | 45 [+] |
| <b>CCNI</b>    | Cyclin-I. [Source:Uniprot/SWISSPROT;Acc:Q14094]                                                                                                                                                  |  | 16.404 | -10.82 | 0.0097295  | 193 | 11 | 9 | 34 [+] |
| <b>CCR3</b>    | C-C chemokine receptor type 3 (C-C CKR-3) (CC-CKR-3) (CCR-3) (CCR3) (CKR3) (Eosinophil eotaxin receptor) (CD193 antigen). [Source:Uniprot/SWISSPROT;Acc:P51677]                                  |  | 16.408 | -12.64 | 0.0166498  | 382 | 18 | 4 | 37 [+] |
| <b>CD163</b>   | Scavenger receptor cysteine-rich type 1 protein M130 precursor (CD163 antigen) (Hemoglobin scavenger receptor) [Contains: Soluble CD163 (sCD163)]. [Source:Uniprot/SWISSPROT;Acc:Q86VB7]         |  | 16.065 | -8.47  | 0.00333331 | 249 | 14 | 4 | 55 [+] |
| <b>CD164L2</b> | CD164 sialomucin-like 2 protein precursor. [Source:Uniprot/SWISSPROT;Acc:Q6UWJ8]                                                                                                                 |  | 16.828 | -16.75 | 0.0241791  | 364 | 22 | 1 | 56 [+] |
| <b>CD1E</b>    | T-cell surface glycoprotein CD1e precursor (CD1e antigen) (R2G1). [Source:Uniprot/SWISSPROT;Acc:P15812]                                                                                          |  | 16.127 | -19.26 | 0.0470954  | 633 | 16 | 1 | 17 [+] |

|                 |                                                                                                                                                                      |  |        |        |            |      |    |   |        |
|-----------------|----------------------------------------------------------------------------------------------------------------------------------------------------------------------|--|--------|--------|------------|------|----|---|--------|
| <b>CD48</b>     | CD48 antigen precursor (B-lymphocyte activation marker BLAST-1) (BCM1 surface antigen) (Leukocyte antigen MEM-102) (TCT.1).<br>[Source:Uniprot/SWISSPROT;Acc:P09326] |  | 17.158 | -13.5  | 0.0128317  | 306  | 17 | 6 | 49 [+] |
| <b>CDADC1</b>   | Cytidine and dCMP deaminase domain containing 1<br>[Source:RefSeq_peptide;Acc:NP_112173]                                                                             |  | 16.857 | -12.95 | 0.0235427  | 286  | 14 | 1 | 49 [+] |
| <b>CDADC1</b>   | Cytidine and dCMP deaminase domain containing 1<br>[Source:RefSeq_peptide;Acc:NP_112173]                                                                             |  | 16.38  | -12.95 | 0.0365465  | 388  | 16 | 1 | 34 [+] |
| <b>CDCA4</b>    | Cell division cycle-associated protein 4 (Hematopoietic progenitor protein).<br>[Source:Uniprot/SWISSPROT;Acc:Q9BXL8]                                                |  | 16.39  | -23.36 | 0.0244655  | 1260 | 19 | 3 | 25 [+] |
| <b>CDH8</b>     | Cadherin-8 precursor.<br>[Source:Uniprot/SWISSPROT;Acc:P55286]                                                                                                       |  | 15.499 | -12.85 | 0.00622317 | 147  | 8  | 6 | 31 [+] |
| <b>CDKN1B</b>   | Cyclin-dependent kinase inhibitor 1B (Cyclin-dependent kinase inhibitor p27) (p27Kip1).<br>[Source:Uniprot/SWISSPROT;Acc:P46527]                                     |  | 16.165 | -17.17 | 0.0028634  | 1341 | 12 | 4 | 13 [+] |
| <b>CDKN2AIP</b> | Collaborates/cooperates with ARF (alternate reading frame) protein<br>[Source:RefSeq_peptide;Acc:NP_060102]                                                          |  | 16.405 | -18.55 | 0.0023663  | 766  | 17 | 6 | 28 [+] |

|               |                                                                                                                                                                                                                                                                                 |  |        |        |            |     |    |   |        |
|---------------|---------------------------------------------------------------------------------------------------------------------------------------------------------------------------------------------------------------------------------------------------------------------------------|--|--------|--------|------------|-----|----|---|--------|
| <b>CDKN3</b>  | Cyclin-dependent kinase inhibitor 3 (EC 3.1.3.48) (EC 3.1.3.16) (CDK2-associated dual-specificity phosphatase) (Kinase-associated phosphatase) (Cyclin-dependent kinase-interacting protein 2) (Cyclin-dependent kinase interactor 1).<br>[Source:Uniprot/SWISSPROT;Acc:Q16667] |  | 16.63  | -11.89 | 0.00256443 | 136 | 6  | 5 | 27 [+] |
| <b>CENTD3</b> | Centaurin-delta 3 (Cnt-d3) (Arf-GAP, Rho-GAP, ankyrin repeat and pleckstrin homology domain-containing protein 3).<br>[Source:Uniprot/SWISSPROT;Acc:Q8WWN8]                                                                                                                     |  | 16.658 | -15.24 | 0.0283111  | 547 | 21 | 5 | 39 [+] |
| <b>CETN3</b>  | Centrin-3.<br>[Source:Uniprot/SWISSPROT;Acc:O15182]                                                                                                                                                                                                                             |  | 16.123 | -7.8   | 7.35E-06   | 350 | 19 | 8 | 66 [+] |
| <b>CHCHD8</b> | Coiled-coil-helix-coiled-coil-helix domain containing 8<br>[Source:RefSeq_peptide;Acc:NP_057649]                                                                                                                                                                                |  | 16.342 | -16.64 | 0.00225599 | 448 | 20 | 5 | 55 [+] |
| <b>CHD1L</b>  | Chromodomain helicase DNA binding protein 1-like<br>[Source:RefSeq_peptide;Acc:NP_004275]                                                                                                                                                                                       |  | 15.386 | -11    | 0.00177268 | 253 | 15 | 6 | 64 [+] |
| <b>CHD7</b>   | Chromodomain-helicase-DNA-binding protein 7 (EC 3.6.1.-) (ATP-dependent helicase CHD7) (CHD-7) (Fragment).<br>[Source:Uniprot/SWISSPROT;Acc:Q9P2D1]                                                                                                                             |  | 16.65  | -22.07 | 0.0191297  | 971 | 19 | 6 | 37 [+] |

|                   |                                                                                                                                                            |  |        |        |            |      |    |   |        |
|-------------------|------------------------------------------------------------------------------------------------------------------------------------------------------------|--|--------|--------|------------|------|----|---|--------|
| <b>CKAP2</b>      | Cytoskeleton-associated protein 2 (Tumor-associated microtubule-associated protein) (CTCL tumor antigen se20-10).<br>[Source:Uniprot/SWISSPROT;Acc:Q8WWK9] |  | 17.76  | -20.64 | 0.010158   | 336  | 17 | 1 | 45 [+] |
| <b>CKS1_HUMAN</b> | Cyclin-dependent kinases regulatory subunit 1 (CKS-1).<br>[Source:Uniprot/SWISSPROT;Acc:P61024]                                                            |  | 15.767 | -15.67 | 0.00125384 | 1000 | 14 | 3 | 20 [+] |
| <b>CKS1B</b>      | Cyclin-dependent kinases regulatory subunit 1 (CKS-1).<br>[Source:Uniprot/SWISSPROT;Acc:P61024]                                                            |  | 17.015 | -15.67 | 0.0018443  | 469  | 21 | 2 | 41 [+] |
| <b>CKS1B</b>      | Cyclin-dependent kinases regulatory subunit 1 (CKS-1).<br>[Source:Uniprot/SWISSPROT;Acc:P61024]                                                            |  | 17.007 | -15.67 | 0.00186859 | 471  | 21 | 1 | 37 [+] |
| <b>CLCC1</b>      | Mid-1-related chloride channel 1 isoform 1<br>[Source:RefSeq_peptide;Acc:NP_001041675]                                                                     |  | 17.158 | -16.38 | 0.0179489  | 725  | 15 | 1 | 15 [+] |
| <b>CLCNKA</b>     | Chloride channel protein ClC-Ka (Chloride channel Ka) (ClC-K1).<br>[Source:Uniprot/SWISSPROT;Acc:P51800]                                                   |  | 16.471 | -19.37 | 0.00279254 | 392  | 17 | 1 | 34 [+] |
| <b>CLCNKB</b>     | Chloride channel protein ClC-Kb (Chloride channel Kb) (ClC-K2).<br>[Source:Uniprot/SWISSPROT;Acc:P51801]                                                   |  | 16.471 | -19.37 | 0.00279254 | 392  | 17 | 2 | 40 [+] |

|                |                                                                                                                                                                                                             |  |        |        |            |      |    |   |        |
|----------------|-------------------------------------------------------------------------------------------------------------------------------------------------------------------------------------------------------------|--|--------|--------|------------|------|----|---|--------|
| <b>CLK2</b>    | Dual specificity protein kinase CLK2 (EC 2.7.12.1) (CDC-like kinase 2).<br>[Source:Uniprot/SWISSPROT;Acc:P49760]                                                                                            |  | 15.567 | -15.42 | 0.00267337 | 350  | 18 | 5 | 49 [+] |
| <b>CLLU10S</b> | Chronic lymphocytic leukemia up-regulated 1 opposite strand<br>[Source:RefSeq_peptide;Acc:NP_001020403]                                                                                                     |  | 17.309 | -15.44 | 0.015558   | 378  | 19 | 1 | 42 [+] |
| <b>CLOCK</b>   | Circadian locomoter output cycles protein kaput (hCLOCK).<br>[Source:Uniprot/SWISSPROT;Acc:O15516]                                                                                                          |  | 16.178 | -15.85 | 0.044927   | 592  | 15 | 1 | 24 [+] |
| <b>CLTA</b>    | Clathrin light chain A (Lca).<br>[Source:Uniprot/SWISSPROT;Acc:P09496]                                                                                                                                      |  | 16.065 | -17.94 | 0.048693   | 282  | 12 | 1 | 36 [+] |
| <b>CLTA</b>    | Clathrin light chain A (Lca).<br>[Source:Uniprot/SWISSPROT;Acc:P09496]                                                                                                                                      |  | 16.065 | -17.94 | 0.048693   | 285  | 15 | 7 | 49 [+] |
| <b>CNIH3</b>   | Cornichon homolog 3.<br>[Source:Uniprot/SWISSPROT;Acc:Q8TBE1]                                                                                                                                               |  | 15.539 | -21.34 | 0.00618247 | 1208 | 11 | 3 | 19 [+] |
| <b>CNOT4</b>   | CCR4-NOT transcription complex subunit 4 (EC 6.3.2.-) (E3 ubiquitin protein ligase CNOT4) (CCR4-associated factor 4) (Potential transcriptional repressor NOT4Hp).<br>[Source:Uniprot/SWISSPROT;Acc:O95628] |  | 18.23  | -23.65 | 0.00124872 | 1000 | 15 | 5 | 18 [+] |

|                |                                                                                                                                                                                                                                                                                                             |  |        |        |            |      |    |   |        |
|----------------|-------------------------------------------------------------------------------------------------------------------------------------------------------------------------------------------------------------------------------------------------------------------------------------------------------------|--|--------|--------|------------|------|----|---|--------|
| <b>CNOT4</b>   | CCR4-NOT transcription complex subunit 4 (EC 6.3.2.-) (E3 ubiquitin protein ligase CNOT4) (CCR4-associated factor 4) (Potential transcriptional repressor NOT4Hp).<br>[Source:Uniprot/SWISSPROT;Acc:O95628]                                                                                                 |  | 18.153 | -23.65 | 0.00700514 | 1000 | 9  | 1 | 10 [+] |
| <b>CNTNAP4</b> | Contactin-associated protein-like 4 precursor (Cell recognition molecule Caspr4).<br>[Source:Uniprot/SWISSPROT;Acc:Q9C0A0]                                                                                                                                                                                  |  | 15.536 | -11.65 | 0.00801137 | 380  | 19 | 6 | 57 [+] |
| <b>COASY</b>   | Bifunctional coenzyme A synthase (CoA synthase) (NBP) (POV-2)<br>[Includes: Phosphopantetheine adenylyltransferase (EC 2.7.7.3) (Pantetheine-phosphate adenylyltransferase) (PPAT) (Dephospho-CoA pyrophosphorylase); Dephospho-CoA kinase (EC 2.7.1.24) (DPCK) (D<br>[Source:Uniprot/SWISSPROT;Acc:Q13057] |  | 16.913 | -11.43 | 0.00042193 | 309  | 16 | 4 | 62 [+] |
| <b>COIL</b>    | Coilin (p80).<br>[Source:Uniprot/SWISSPROT;Acc:P38432]                                                                                                                                                                                                                                                      |  | 15.577 | -16.17 | 0.00604422 | 869  | 24 | 4 | 29 [+] |
| <b>COL6A3</b>  | Collagen alpha-3(VI) chain precursor.<br>[Source:Uniprot/SWISSPROT;Acc:P12111]                                                                                                                                                                                                                              |  | 16.738 | -18.57 | 0.0266201  | 755  | 18 | 8 | 33 [+] |

|               |                                                                                                                                                                                                      |  |        |        |            |      |    |   |        |
|---------------|------------------------------------------------------------------------------------------------------------------------------------------------------------------------------------------------------|--|--------|--------|------------|------|----|---|--------|
| <b>COMMD5</b> | COMM domain-containing protein 5 (Hypertension-related calcium-regulated gene protein) (HCaRG).<br>[Source:Uniprot/SWISSPROT;Acc:Q9GZQ3]                                                             |  | 17.169 | -28.57 | 0.0177562  | 2204 | 3  | 1 | 3 [+]  |
| <b>COPS6</b>  | COP9 signalosome complex subunit 6 (Signalosome subunit 6) (SGN6) (JAB1-containing signalosome subunit 6) (Vpr-interacting protein) (hVIP) (MOV34 homolog).<br>[Source:Uniprot/SWISSPROT;Acc:Q7L5N1] |  | 16.727 | -16.78 | 0.0269007  | 408  | 18 | 3 | 49 [+] |
| <b>COQ2</b>   | Para-hydroxybenzoate--polyprenyltransferase, mitochondrial precursor (EC 2.5.1.-) (PHB:polyprenyltransferase) (hCOQ2).<br>[Source:Uniprot/SWISSPROT;Acc:Q96H96]                                      |  | 16.269 | -12.58 | 0.0141753  | 373  | 19 | 3 | 58 [+] |
| <b>CORO7</b>  | Coronin-7 (70 kDa WD repeat tumor rejection antigen homolog).<br>[Source:Uniprot/SWISSPROT;Acc:P57737]                                                                                               |  | 16.326 | -18.9  | 0.00515458 | 614  | 23 | 6 | 46 [+] |
| <b>COX5A</b>  | Cytochrome c oxidase subunit 5A, mitochondrial precursor (EC 1.9.3.1) (Cytochrome c oxidase polypeptide Va).<br>[Source:Uniprot/SWISSPROT;Acc:P20674]                                                |  | 17.309 | -20.28 | 0.0155574  | 172  | 10 | 5 | 53 [+] |
| <b>CPNE2</b>  | Copine-2 (Copine II).<br>[Source:Uniprot/SWISSPROT;Acc:Q96FN4]                                                                                                                                       |  | 17.422 | -12.69 | 1.44E-05   | 306  | 15 | 7 | 65 [+] |

|                |                                                                                                                                                                 |  |        |        |            |      |    |   |        |
|----------------|-----------------------------------------------------------------------------------------------------------------------------------------------------------------|--|--------|--------|------------|------|----|---|--------|
| <b>CPO</b>     | Carboxypeptidase O precursor (EC 3.4.17.-) (CPO).<br>[Source:Uniprot/SWISSPROT;Acc:Q8IVL8]                                                                      |  | 16.744 | -22.85 | 0.00192315 | 140  | 7  | 3 | 35 [+] |
| <b>CPOX</b>    | Coproporphyrinogen III oxidase, mitochondrial precursor (EC 1.3.3.3) (Coproporphyrinogenase) (Coprogen oxidase) (COX).<br>[Source:Uniprot/SWISSPROT;Acc:P36551] |  | 16.773 | -22.8  | 5.68E-05   | 1235 | 16 | 3 | 21 [+] |
| <b>CREB3</b>   | Cyclic AMP-responsive element-binding protein 3 (Luman protein) (Transcription factor LZIP-alpha).<br>[Source:Uniprot/SWISSPROT;Acc:O43889]                     |  | 16.404 | -11.54 | 0.0357474  | 281  | 16 | 7 | 65 [+] |
| <b>CREG2</b>   | Protein CREG2 precursor.<br>[Source:Uniprot/SWISSPROT;Acc:Q8IUH2]                                                                                               |  | 15.829 | -16.49 | 8.08E-05   | 2162 | 5  | 2 | 5 [+]  |
| <b>CSF3R</b>   | Granulocyte colony-stimulating factor receptor precursor (G-CSF-R) (CD114 antigen).<br>[Source:Uniprot/SWISSPROT;Acc:Q99062]                                    |  | 17.196 | -14.66 | 0.0173093  | 53   | 2  | 1 | 8 [+]  |
| <b>CSF3R</b>   | Granulocyte colony-stimulating factor receptor precursor (G-CSF-R) (CD114 antigen).<br>[Source:Uniprot/SWISSPROT;Acc:Q99062]                                    |  | 17.108 | -14.66 | 0.0181327  | 314  | 18 | 3 | 62 [+] |
| <b>CXorf24</b> | Chromosome X open reading frame 24.<br>[Source:Uniprot/SPTREMBL;Acc:Q5H9B1]                                                                                     |  | 17.044 | -22.36 | 0.0199764  | 919  | 13 | 1 | 10 [+] |



|                 |                                                                                                                                                                                                             |        |        |            |     |    |   |        |
|-----------------|-------------------------------------------------------------------------------------------------------------------------------------------------------------------------------------------------------------|--------|--------|------------|-----|----|---|--------|
| <b>CXorf24</b>  | Chromosome X open reading frame 24.<br>[Source:Uniprot/SPTREMBL;Acc:Q5H9B1]                                                                                                                                 | 17.044 | -22.36 | 0.0199764  | 934 | 13 | 1 | 10 [+] |
| <b>CXorf40B</b> | Protein CXorf40B.<br>[Source:Uniprot/SWISSPROT;Acc:Q96DE9]                                                                                                                                                  | 17.482 | -18.65 | 0.0132104  | 546 | 18 | 1 | 36 [+] |
| <b>CYorf15B</b> | Lipopolysaccharide-specific response 5-like protein<br>[Source:RefSeq_peptide;Acc:NP_115965]                                                                                                                | 16.274 | -14.31 | 0.0410837  | 373 | 15 | 1 | 39 [+] |
| <b>CYP11A1</b>  | Cytochrome P450 11A1, mitochondrial precursor (EC 1.14.15.6) (CYPXIA1) (P450(scc)) (Cholesterol side-chain cleavage enzyme) (Cholesterol desmolase).<br>[Source:Uniprot/SWISSPROT;Acc:P05108]               | 16.178 | -19.36 | 0.00721161 | 173 | 11 | 7 | 49 [+] |
| <b>CYP26A1</b>  | Cytochrome P450 26A1 (EC 1.14.-.-) (Retinoic acid-metabolizing cytochrome) (P450 retinoic acid-inactivating 1) (P450RAI) (hP450RAI) (Retinoic acid 4-hydroxylase).<br>[Source:Uniprot/SWISSPROT;Acc:O43174] | 16.134 | -13.19 | 0.0457162  | 580 | 15 | 1 | 17 [+] |

|                |                                                                                                                                                                                                             |        |        |            |     |    |   |        |
|----------------|-------------------------------------------------------------------------------------------------------------------------------------------------------------------------------------------------------------|--------|--------|------------|-----|----|---|--------|
| <b>CYP26A1</b> | Cytochrome P450 26A1 (EC 1.14.-.-) (Retinoic acid-metabolizing cytochrome) (P450 retinoic acid-inactivating 1) (P450RAI) (hP450RAI) (Retinoic acid 4-hydroxylase).<br>[Source:Uniprot/SWISSPROT;Acc:O43174] | 16.117 | -13.19 | 0.0464584  | 586 | 18 | 6 | 30 [+] |
| <b>CYP4F3</b>  | Cytochrome P450 4F3 (EC 1.14.13.30) (CYPIVF3) (Leukotriene-B(4) omega- hydroxylase) (Leukotriene-B(4) 20-monooxygenase) (Cytochrome P450-LTB- omega).<br>[Source:Uniprot/SWISSPROT;Acc:Q08477]              | 16.609 | -18.27 | 0.0258617  | 386 | 16 | 3 | 34 [+] |
| <b>D2HGDH</b>  | D-2-hydroxyglutarate dehydrogenase, mitochondrial precursor (EC 1.1.99.-).<br>[Source:Uniprot/SWISSPROT;Acc:Q8N465]                                                                                         | 15.318 | -13.48 | 0.0088673  | 840 | 21 | 2 | 29 [+] |
| <b>DAB1</b>    | Disabled homolog 1.<br>[Source:Uniprot/SWISSPROT;Acc:O75553]                                                                                                                                                | 18.667 | -14.79 | 0.00430209 | 244 | 11 | 1 | 34 [+] |
| <b>DAPK3</b>   | Death-associated protein kinase 3 (EC 2.7.11.1) (DAP kinase 3) (DAP-like kinase) (Dlk) (ZIP-kinase).<br>[Source:Uniprot/SWISSPROT;Acc:O43293]                                                               | 16.138 | -23.02 | 0.00868216 | 645 | 23 | 3 | 37 [+] |
| <b>DCHS2</b>   | Dachsous 2 isoform 1<br>[Source:RefSeq_peptide;Acc:NP_060109]                                                                                                                                               | 17.083 | -18.33 | 0.00746769 | 161 | 9  | 4 | 26 [+] |

|                |                                                                                                                                                                               |  |        |        |            |      |    |   |        |
|----------------|-------------------------------------------------------------------------------------------------------------------------------------------------------------------------------|--|--------|--------|------------|------|----|---|--------|
| <b>DCLRE1A</b> | DNA cross-link repair 1A protein (hSNM1) (hSNM1A).<br>[Source:Uniprot/SWISSPROT;Acc:Q6PJP8]                                                                                   |  | 15.992 | -13.06 | 0.0093023  | 427  | 22 | 5 | 53 [+] |
| <b>DCN</b>     | Decorin precursor (Bone proteoglycan II) (PG-S2) (PG40).<br>[Source:Uniprot/SWISSPROT;Acc:P07585]                                                                             |  | 15.99  | -16.8  | 1.89E-05   | 799  | 20 | 4 | 30 [+] |
| <b>DCP1B</b>   | mRNA-decapping enzyme 1B (EC 3.-.-.-).<br>[Source:Uniprot/SWISSPROT;Acc:Q8IZD4]                                                                                               |  | 16.404 | -16.28 | 0.00727433 | 156  | 7  | 4 | 24 [+] |
| <b>DDHD1</b>   | Probable phospholipase DDHD1 (EC 3.1.1.-) (DDHD domain protein 1) (Phosphatidic acid-preferring phospholipase A1 homolog) (PA-PLA1).<br>[Source:Uniprot/SWISSPROT;Acc:Q8NEL9] |  | 15.499 | -14.33 | 0.011477   | 146  | 8  | 7 | 40 [+] |
| <b>DDIT4</b>   | RTP801<br>[Source:RefSeq_peptide;Acc:NP_061931]                                                                                                                               |  | 15.888 | -18.53 | 0.0011719  | 851  | 24 | 6 | 30 [+] |
| <b>DDX59</b>   | Probable ATP-dependent RNA helicase DDX59 (EC 3.6.1.-) (DEAD box protein 59) (Zinc finger HIT domain-containing protein 5).<br>[Source:Uniprot/SWISSPROT;Acc:Q5T1V6]          |  | 16.225 | -20.36 | 0.0430107  | 1005 | 9  | 1 | 10 [+] |
| <b>DEFB114</b> | $\beta$ -Defensin 114 precursor (Defensin, beta 114) (Beta-defensin 14) (DEFB-14).<br>[Source:Uniprot/SWISSPROT;Acc:Q30KQ6]                                                   |  | 16.13  | -14.32 | 0.01072    | 1000 | 9  | 2 | 9 [+]  |

|               |                                                                                                                                                                                                                                                                                  |        |        |            |      |    |   |        |
|---------------|----------------------------------------------------------------------------------------------------------------------------------------------------------------------------------------------------------------------------------------------------------------------------------|--------|--------|------------|------|----|---|--------|
| <b>DEGS2</b>  | Sphingolipid C4-hydroxylase/delta 4-desaturase<br>[Source:RefSeq_peptide;Acc:NP_996801]                                                                                                                                                                                          | 17.185 | -14.24 | 0.0174953  | 339  | 20 | 4 | 66 [+] |
| <b>DEPDC5</b> | DEP domain-containing protein 5.<br>[Source:Uniprot/SWISSPROT;Acc:O75140]                                                                                                                                                                                                        | 16.124 | -14.73 | 0.00013116 | 517  | 24 | 4 | 62 [+] |
| <b>DEPDC6</b> | DEP domain-containing protein 6.<br>[Source:Uniprot/SWISSPROT;Acc:Q8TB45]                                                                                                                                                                                                        | 16.798 | -20.92 | 6.13E-06   | 813  | 23 | 3 | 31 [+] |
| <b>DGKH</b>   | Diacylglycerol kinase eta (EC 2.7.1.107) (Diglyceride kinase eta) (DGK-eta) (DAG kinase eta).<br>[Source:Uniprot/SWISSPROT;Acc:Q86XP1]                                                                                                                                           | 15.627 | -9.36  | 0.00325653 | 564  | 23 | 6 | 45 [+] |
| <b>DHRS9</b>  | Dehydrogenase/reductase SDR family member 9 precursor (EC 1.1.-.-) (3- alpha hydroxysteroid dehydrogenase) (3alpha-HSD) (RDH-E2) (Short-chain dehydrogenase/reductase retSDR8) (NADP-dependent retinol dehydrogenase/reductase) (RDHL).<br>[Source:Uniprot/SWISSPROT;Acc:Q9BPW9] | 16.269 | -13.26 | 0.0412807  | 1000 | 6  | 1 | 6 [+]  |
| <b>DHX29</b>  | Putative ATP-dependent RNA helicase DHX29 (EC 3.6.1.-) (DEAH box protein 29) (Nucleic acid helicase DDXx).<br>[Source:Uniprot/SWISSPROT;Acc:Q7Z478]                                                                                                                              | 16.404 | -9.87  | 2.98E-06   | 242  | 15 | 9 | 51 [+] |

|              |                                                                                                                                              |  |        |        |           |      |    |   |        |
|--------------|----------------------------------------------------------------------------------------------------------------------------------------------|--|--------|--------|-----------|------|----|---|--------|
| <b>DIDO1</b> | Death-inducer obliterator 1 (DIO-1)<br>(Death-associated transcription factor 1) (DATF-1) (hDido1).<br>[Source:Uniprot/SWISSPROT;Acc:Q9BTC0] |  | 17.191 | -16.1  | 0.0173852 | 549  | 16 | 1 | 28 [+] |
| <b>DIDO1</b> | Death-inducer obliterator 1 (DIO-1)<br>(Death-associated transcription factor 1) (DATF-1) (hDido1).<br>[Source:Uniprot/SWISSPROT;Acc:Q9BTC0] |  | 16.561 | -16.1  | 0.0314283 | 781  | 13 | 1 | 19 [+] |
| <b>DIDO1</b> | Death-inducer obliterator 1 (DIO-1)<br>(Death-associated transcription factor 1) (DATF-1) (hDido1).<br>[Source:Uniprot/SWISSPROT;Acc:Q9BTC0] |  | 16.557 | -16.1  | 0.0315577 | 783  | 13 | 1 | 19 [+] |
| <b>DIDO1</b> | Death-inducer obliterator 1 (DIO-1)<br>(Death-associated transcription factor 1) (DATF-1) (hDido1).<br>[Source:Uniprot/SWISSPROT;Acc:Q9BTC0] |  | 16.546 | -16.1  | 0.0318818 | 788  | 13 | 1 | 19 [+] |
| <b>DIDO1</b> | Death-inducer obliterator 1 (DIO-1)<br>(Death-associated transcription factor 1) (DATF-1) (hDido1).<br>[Source:Uniprot/SWISSPROT;Acc:Q9BTC0] |  | 16.193 | -16.1  | 0.0433563 | 1000 | 11 | 1 | 16 [+] |
| <b>DIP2C</b> | Disco-interacting protein 2 homolog C.<br>[Source:Uniprot/SWISSPROT;Acc:Q9Y2E4]                                                              |  | 16.13  | -24.79 | 0.0469724 | 1000 | 12 | 1 | 11 [+] |

|                      |                                                                                                                                                                                                                                                                   |  |        |        |            |      |    |   |        |
|----------------------|-------------------------------------------------------------------------------------------------------------------------------------------------------------------------------------------------------------------------------------------------------------------|--|--------|--------|------------|------|----|---|--------|
| <b>DIRAS3</b>        | GTP-binding protein Di-Ras3 (Distinct subgroup of the Ras family member 3) (Rho-related GTP-binding protein Rho).<br>[Source:Uniprot/SWISSPROT;Acc:O95661]                                                                                                        |  | 16.031 | -14.05 | 0.0101457  | 646  | 19 | 3 | 31 [+] |
| <b>DIS3L</b>         | DIS3 mitotic control homolog (S. cerevisiae)-like<br>[Source:RefSeq_peptide;Acc:NP_588616]                                                                                                                                                                        |  | 16.273 | -13.8  | 0.00257015 | 585  | 21 | 6 | 44 [+] |
| <b>DISP2</b>         | Dispatched B<br>[Source:RefSeq_peptide;Acc:NP_277045]                                                                                                                                                                                                             |  | 16.328 | -25.64 | 0.00515316 | 737  | 16 | 5 | 20 [+] |
| <b>DKFZp781N1041</b> | RIKEN cDNA 6430537H07 gene<br>[Source:MarkerSymbol;Acc:MGI:2441717]RIKEN cDNA 6430537H07 gene<br>[Source:MarkerSymbol;Acc:MGI:2441717] BY ORTHOLOGY TO:ENSMUST00000054280                                                                                         |  | 15.533 | -13.37 | 0.0119123  | 1000 | 17 | 4 | 24 [+] |
| <b>DLC1</b>          | Rho GTPase-activating protein 7 (Rho-type GTPase-activating protein 7) (Deleted in liver cancer 1 protein) (Dlc-1) (HP protein) (StAR-related lipid transfer protein 12) (StARD12) (START domain-containing protein 12).<br>[Source:Uniprot/SWISSPROT;Acc:Q96QB1] |  | 16.034 | -11.43 | 0.00177586 | 622  | 17 | 1 | 30 [+] |

|                |                                                                                                                                                                            |        |        |            |      |    |   |        |
|----------------|----------------------------------------------------------------------------------------------------------------------------------------------------------------------------|--------|--------|------------|------|----|---|--------|
| <b>DMGDH</b>   | Dimethylglycine dehydrogenase, mitochondrial precursor (EC 1.5.99.2) (ME2GLYDH).<br>[Source:Uniprot/SWISSPROT;Acc:Q9UI17]                                                  | 15.593 | -9.92  | 0.0161587  | 475  | 17 | 4 | 32 [+] |
| <b>DMRT3</b>   | Doublesex and mab-3-related transcription factor 3.<br>[Source:Uniprot/SWISSPROT;Acc:Q9NQL9]                                                                               | 16.556 | -16.83 | 3.31E-06   | 727  | 25 | 9 | 44 [+] |
| <b>DNAJA1</b>  | DnaJ homolog subfamily A member 1 (Heat shock 40 kDa protein 4) (DnaJ protein homolog 2) (HSJ-2) (HSDJ).<br>[Source:Uniprot/SWISSPROT;Acc:P31689]                          | 15.78  | -19.22 | 0.0073266  | 1004 | 19 | 6 | 30 [+] |
| <b>DNAJB1</b>  | DnaJ homolog subfamily B member 1 (Heat shock 40 kDa protein 1) (Heat shock protein 40) (HSP40) (DnaJ protein homolog 1) (HDJ-1).<br>[Source:Uniprot/SWISSPROT;Acc:P25685] | 15.49  | -16.54 | 2.60E-05   | 1170 | 16 | 6 | 21 [+] |
| <b>DNAJC12</b> | DnaJ homolog subfamily C member 12 (J domain-containing protein 1).<br>[Source:Uniprot/SWISSPROT;Acc:Q9UKB3]                                                               | 16.458 | -16.88 | 0.00074614 | 446  | 21 | 6 | 48 [+] |
| <b>DNAJC7</b>  | DnaJ homolog subfamily C member 7 (Tetratricopeptide repeat protein 2) (TPR repeat protein 2).<br>[Source:Uniprot/SWISSPROT;Acc:Q99615]                                    | 17.762 | -12.58 | 0.0101442  | 294  | 18 | 8 | 77 [+] |

|               |                                                                                                                                                                                                                               |  |        |        |            |      |    |   |        |
|---------------|-------------------------------------------------------------------------------------------------------------------------------------------------------------------------------------------------------------------------------|--|--------|--------|------------|------|----|---|--------|
| <b>DOCK10</b> | Dedicator of cytokinesis protein 10 (Zizimin-3).<br>[Source:Uniprot/SWISSPROT;Acc:Q96BY6]                                                                                                                                     |  | 15.366 | -11.87 | 0.00067655 | 630  | 23 | 7 | 42 [+] |
| <b>DOCK7</b>  | Dedicator of cytokinesis protein 7.<br>[Source:Uniprot/SWISSPROT;Acc:Q96N67]                                                                                                                                                  |  | 15.456 | -11.36 | 1.22E-06   | 516  | 17 | 8 | 31 [+] |
| <b>DOPEY1</b> | Dopey family member 1<br>[Source:RefSeq_peptide;Acc:NP_055833]                                                                                                                                                                |  | 16.065 | -9.55  | 0.028734   | 241  | 14 | 7 | 53 [+] |
| <b>DPH5</b>   | Probable diphthine synthase (EC 2.1.1.98) (Diphthamide biosynthesis methyltransferase).<br>[Source:Uniprot/SWISSPROT;Acc:Q9H2P9]                                                                                              |  | 16.63  | -14.16 | 0.0294592  | 184  | 7  | 1 | 12 [+] |
| <b>DPH5</b>   | Probable diphthine synthase (EC 2.1.1.98) (Diphthamide biosynthesis methyltransferase).<br>[Source:Uniprot/SWISSPROT;Acc:Q9H2P9]                                                                                              |  | 16.377 | -14.16 | 0.0366528  | 344  | 15 | 1 | 32 [+] |
| <b>DPH5</b>   | Probable diphthine synthase (EC 2.1.1.98) (Diphthamide biosynthesis methyltransferase).<br>[Source:Uniprot/SWISSPROT;Acc:Q9H2P9]                                                                                              |  | 16.372 | -14.16 | 0.0368309  | 345  | 15 | 1 | 32 [+] |
| <b>DPP6</b>   | Dipeptidyl aminopeptidase-like protein 6 (Dipeptidylpeptidase VI) (Dipeptidylpeptidase 6) (Dipeptidyl peptidase IV-like protein) (Dipeptidyl aminopeptidase-related protein) (DPPX).<br>[Source:Uniprot/SWISSPROT;Acc:P42658] |  | 16.191 | -17.39 | 0.0443937  | 1000 | 9  | 1 | 7 [+]  |



|                  |                                                                                                                                                                                        |  |        |        |            |      |    |   |        |
|------------------|----------------------------------------------------------------------------------------------------------------------------------------------------------------------------------------|--|--------|--------|------------|------|----|---|--------|
| <b>DPY19L2P1</b> | DPY19L2P1 protein.<br>[Source:Uniprot/SPTREMBL;Acc:Q6NXN4]                                                                                                                             |  | 17.416 | -12.55 | 0.00375073 | 301  | 15 | 1 | 39 [+] |
| <b>DPYD</b>      | Dihydropyrimidine dehydrogenase [NADP+] precursor (EC 1.3.1.2) (DPD) (DHPDHase) (Dihydrouracil dehydrogenase) (Dihydrothymine dehydrogenase).<br>[Source:Uniprot/SWISSPROT;Acc:Q12882] |  | 16.088 | -16.89 | 0.0488453  | 852  | 12 | 1 | 18 [+] |
| <b>DYNC1LI2</b>  | Cytoplasmic dynein 1 light intermediate chain 2 (Dynein light intermediate chain 2, cytosolic) (LIC53/55) (LIC-2).<br>[Source:Uniprot/SWISSPROT;Acc:O43237]                            |  | 15.795 | -17.72 | 0.00231799 | 1000 | 12 | 1 | 16 [+] |
| <b>DYRK3</b>     | Dual specificity tyrosine-phosphorylation-regulated kinase 3 (EC 2.7.12.1).<br>[Source:Uniprot/SWISSPROT;Acc:O43781]                                                                   |  | 16.517 | -13.01 | 0.0111438  | 231  | 13 | 7 | 40 [+] |
| <b>DYRK3</b>     | Dual specificity tyrosine-phosphorylation-regulated kinase 3 (EC 2.7.12.1).<br>[Source:Uniprot/SWISSPROT;Acc:O43781]                                                                   |  | 16.517 | -13.01 | 0.0327503  | 149  | 8  | 1 | 17 [+] |
| <b>DYRK3</b>     | Dual specificity tyrosine-phosphorylation-regulated kinase 3 (EC 2.7.12.1).<br>[Source:Uniprot/SWISSPROT;Acc:O43781]                                                                   |  | 16.517 | -13.01 | 0.0327503  | 232  | 12 | 1 | 28 [+] |

|               |                                                                                                                                                                                                      |  |        |        |            |      |    |    |        |
|---------------|------------------------------------------------------------------------------------------------------------------------------------------------------------------------------------------------------|--|--------|--------|------------|------|----|----|--------|
| <b>E2F5</b>   | Transcription factor E2F5 (E2F-5).<br>[Source:Uniprot/SWISSPROT;Acc:Q15329]                                                                                                                          |  | 15.389 | -9.36  | 1.73E-06   | 653  | 24 | 9  | 44 [+] |
| <b>EDG1</b>   | Sphingosine 1-phosphate receptor Edg-1 (Sphingosine 1-phosphate receptor 1) (S1P1).<br>[Source:Uniprot/SWISSPROT;Acc:P21453]                                                                         |  | 16.009 | -12.34 | 0.00325905 | 1385 | 12 | 8  | 21 [+] |
| <b>EDG8</b>   | Sphingosine 1-phosphate receptor Edg-8 (Endothelial differentiation sphingolipid G-protein-coupled receptor 8) (Sphingosine 1-phosphate receptor 5) (S1P5).<br>[Source:Uniprot/SWISSPROT;Acc:Q9H228] |  | 15.452 | -17.9  | 0.0073915  | 868  | 13 | 4  | 26 [+] |
| <b>EED</b>    | Embryonic ectoderm development isoform b<br>[Source:RefSeq_peptide;Acc:NP_694536]                                                                                                                    |  | 15.931 | -16.02 | 0.0011674  | 1000 | 15 | 10 | 28 [+] |
| <b>EED</b>    | Embryonic ectoderm development isoform b<br>[Source:RefSeq_peptide;Acc:NP_694536]                                                                                                                    |  | 16.421 | -16.02 | 0.0358236  | 741  | 16 | 1  | 26 [+] |
| <b>EEF1E1</b> | Eukaryotic translation elongation factor 1 epsilon-1 (Multisynthetase complex auxiliary component p18) (Elongation factor p18).<br>[Source:Uniprot/SWISSPROT;Acc:O43324]                             |  | 16.067 | -13.02 | 0.00581506 | 493  | 19 | 6  | 37 [+] |
| <b>EFCAB2</b> | EF-hand calcium-binding domain-containing protein 2.<br>[Source:Uniprot/SWISSPROT;Acc:Q5VUJ9]                                                                                                        |  | 16.783 | -18.93 | 0.00539081 | 1043 | 12 | 2  | 12 [+] |

|               |                                                                                                                                                               |  |        |        |            |      |    |   |        |
|---------------|---------------------------------------------------------------------------------------------------------------------------------------------------------------|--|--------|--------|------------|------|----|---|--------|
| <b>EGR4</b>   | Early growth response protein 4 (EGR-4) (AT133).<br>[Source:Uniprot/SWISSPROT;Acc:Q05215]                                                                     |  | 16.343 | -20.22 | 0.0006726  | 519  | 23 | 7 | 52 [+] |
| <b>EIF1B</b>  | Eukaryotic translation initiation factor 1b (eIF1b) (Protein translation factor SUI1 homolog GC20).<br>[Source:Uniprot/SWISSPROT;Acc:O60739]                  |  | 15.554 | -12.34 | 0.0120202  | 410  | 19 | 7 | 55 [+] |
| <b>EIF2B2</b> | Translation initiation factor eIF-2B subunit beta (eIF-2B GDP-GTP exchange factor subunit beta) (S20I15) (S20III15).<br>[Source:Uniprot/SWISSPROT;Acc:P49770] |  | 15.597 | -12.24 | 0.00085205 | 401  | 21 | 6 | 72 [+] |
| <b>EIF4A2</b> | Eukaryotic initiation factor 4A-II (EC 3.6.1.-) (ATP-dependent RNA helicase eIF4A-2) (eIF4A-II) (eIF-4A-II).<br>[Source:Uniprot/SWISSPROT;Acc:Q14240]         |  | 17.131 | -17.26 | 0.00456062 | 625  | 17 | 7 | 27 [+] |
| <b>ELAVL4</b> | ELAV-like protein 4 (Paraneoplastic encephalomyelitis antigen HuD) (Hu-antigen D).<br>[Source:Uniprot/SWISSPROT;Acc:P26378]                                   |  | 15.435 | -17.5  | 0.00091374 | 1876 | 5  | 6 | 6 [+]  |
| <b>ELAVL4</b> | ELAV-like protein 4 (Paraneoplastic encephalomyelitis antigen HuD) (Hu-antigen D).<br>[Source:Uniprot/SWISSPROT;Acc:P26378]                                   |  | 16.227 | -17.5  | 0.0429496  | 1116 | 8  | 1 | 11 [+] |

|               |                                                                                                                                                                                                                                                                                                                                  |  |        |        |            |      |    |   |        |
|---------------|----------------------------------------------------------------------------------------------------------------------------------------------------------------------------------------------------------------------------------------------------------------------------------------------------------------------------------|--|--------|--------|------------|------|----|---|--------|
| <b>EME1</b>   | Crossover junction endonuclease<br>EME1 (EC 3.1.22.-) (hMMS4).<br>[Source:Uniprot/SWISSPROT;Acc:Q96AY2]                                                                                                                                                                                                                          |  | 15.663 | -11.97 | 0.00132273 | 518  | 20 | 5 | 46 [+] |
| <b>ENPPI</b>  | Ectonucleotide<br>pyrophosphatase/phosphodiesterase<br>family member 1 (E- NPP 1)<br>(Phosphodiesterase I/nucleotide<br>pyrophosphatase 1) (Plasma-cell<br>membrane glycoprotein PC-1)<br>[Includes: Alkaline<br>phosphodiesterase I (EC 3.1.4.1);<br>Nucleotide pyrophosphatase (EC 3.<br>[Source:Uniprot/SWISSPROT;Acc:P22413] |  | 16.229 | -11.59 | 0.00023632 | 699  | 15 | 5 | 29 [+] |
| <b>ENSA</b>   | $\alpha$ -Endosulfine (ARPP-19e).<br>[Source:Uniprot/SWISSPROT;Acc:O43768]                                                                                                                                                                                                                                                       |  | 17.649 | -14.16 | 0.01129    | 284  | 15 | 1 | 55 [+] |
| <b>ENTPD4</b> | Ectonucleoside triphosphate<br>diphosphohydrolase 4 (EC 3.6.1.6)<br>(NTPDase 4) (Uridine-<br>diphosphatase) (UDPase) (Lysosomal<br>apyrase-like protein of 70 kDa).<br>[Source:Uniprot/SWISSPROT;Acc:Q9Y227]                                                                                                                     |  | 16.201 | -23.35 | 0.0439779  | 1000 | 10 | 1 | 14 [+] |
| <b>ENTPD7</b> | Ectonucleoside triphosphate<br>diphosphohydrolase 7 (EC 3.6.1.-)<br>(NTPDase 7) (Lysosomal apyrase-<br>like protein 1).<br>[Source:Uniprot/SWISSPROT;Acc:Q9NQZ7]                                                                                                                                                                 |  | 16.117 | -16.77 | 0.00694643 | 1557 | 12 | 4 | 15 [+] |

|              |                                                                                                                                                              |  |        |        |            |      |    |   |        |
|--------------|--------------------------------------------------------------------------------------------------------------------------------------------------------------|--|--------|--------|------------|------|----|---|--------|
| <b>EPC1</b>  | Enhancer of polycomb homolog 1.<br>[Source:Uniprot/SWISSPROT;Acc:Q9H2F5]                                                                                     |  | 16.065 | -17.44 | 0.0215433  | 132  | 8  | 6 | 47 [+] |
| <b>ERMAP</b> | Erythroid membrane-associated protein precursor (hERMAP) (Scianna blood group antigen) (Radin blood group antigen).<br>[Source:Uniprot/SWISSPROT;Acc:Q96PL5] |  | 16.321 | -17.56 | 0.0393436  | 1753 | 7  | 1 | 7 [+]  |
| <b>ERMAP</b> | Erythroid membrane-associated protein precursor (hERMAP) (Scianna blood group antigen) (Radin blood group antigen).<br>[Source:Uniprot/SWISSPROT;Acc:Q96PL5] |  | 16.317 | -17.56 | 0.0394731  | 1757 | 8  | 3 | 8 [+]  |
| <b>ESM1</b>  | Endothelial cell-specific molecule 1 precursor (ESM-1 secretory protein) (ESM-1).<br>[Source:Uniprot/SWISSPROT;Acc:Q9NQ30]                                   |  | 15.841 | -18.28 | 0.0108781  | 1468 | 15 | 4 | 16 [+] |
| <b>ESR2</b>  | Estrogen receptor beta (ER-beta).<br>[Source:Uniprot/SWISSPROT;Acc:Q92731]                                                                                   |  | 16.55  | -18.07 | 0.0317517  | 1234 | 7  | 1 | 8 [+]  |
| <b>EXDL1</b> | Exonuclease 3'-5' domain-like 1<br>[Source:RefSeq_peptide;Acc:NP_689809]                                                                                     |  | 15.716 | -16.44 | 0.00226673 | 1196 | 9  | 4 | 10 [+] |
| <b>EXOC2</b> | Exocyst complex component 2 (Exocyst complex component Sec5).<br>[Source:Uniprot/SWISSPROT;Acc:Q96KP1]                                                       |  | 15.323 | -15.63 | 0.00454459 | 1532 | 13 | 3 | 17 [+] |

|                  |                                                                                                                                                                                                                                                                                     |  |        |        |            |      |    |   |        |
|------------------|-------------------------------------------------------------------------------------------------------------------------------------------------------------------------------------------------------------------------------------------------------------------------------------|--|--------|--------|------------|------|----|---|--------|
| <b>EXOSC3</b>    | Exosome complex exonuclease RRP40 (EC 3.1.13.-) (Ribosomal RNA- processing protein 40) (Exosome component 3) (p10). [Source:Uniprot/SWISSPROT;Acc:Q9NQT5]                                                                                                                           |  | 17.292 | -18.14 | 0.0008369  | 368  | 19 | 4 | 50 [+] |
| <b>EXT2</b>      | Exostosin-2 (EC 2.4.1.224) (EC 2.4.1.225) (Glucuronosyl-N-acetylglucosaminyl-proteoglycan/N-acetylglucosaminyl-proteoglycan 4-alpha-N-acetylglucosaminyltransferase) (Putative tumor suppressor protein EXT2) (Multiple exostoses protein 2). [Source:Uniprot/SWISSPROT;Acc:Q93063] |  | 16.453 | -20.1  | 0.00071276 | 644  | 22 | 4 | 44 [+] |
| <b>F5</b>        | Coagulation factor V precursor (Activated protein C cofactor) [Contains: Coagulation factor V heavy chain; Coagulation factor V light chain]. [Source:Uniprot/SWISSPROT;Acc:P12259]                                                                                                 |  | 15.612 | -13.98 | 0.00531893 | 142  | 8  | 2 | 26 [+] |
| <b>FAM120AOS</b> | family with sequence similarity 120A opposite strand (FAM120AOS), mRNA [Source:RefSeq_dna;Acc:NM_198841]                                                                                                                                                                            |  | 15.614 | -11.63 | 0.0450596  | 1110 | 15 | 2 | 22 [+] |
| <b>FAM43A</b>    | Protein FAM43A. [Source:Uniprot/SWISSPROT;Acc:Q8N2R8]                                                                                                                                                                                                                               |  | 16.49  | -15.03 | 0.0231854  | 935  | 19 | 7 | 28 [+] |

|               |                                                                                                              |  |        |        |            |      |    |   |        |
|---------------|--------------------------------------------------------------------------------------------------------------|--|--------|--------|------------|------|----|---|--------|
| <b>FAM47B</b> | Protein FAM47B.<br>[Source:Uniprot/SWISSPROT;Acc:Q8NA70]                                                     |  | 17.875 | -19.65 | 0.00676698 | 146  | 7  | 2 | 20 [+] |
| <b>FAM47B</b> | Protein FAM47B.<br>[Source:Uniprot/SWISSPROT;Acc:Q8NA70]                                                     |  | 17.875 | -19.65 | 0.00911416 | 145  | 7  | 1 | 20 [+] |
| <b>FAM58A</b> | Similar to CG31232-PA, isoform A (LOC401218), mRNA<br>[Source:RefSeq_dna;Acc:XR_016722]                      |  | 16.402 | -11.43 | 3.20E-06   | 433  | 21 | 5 | 48 [+] |
| <b>FAM58A</b> | Similar to CG31232-PA, isoform A (LOC401218), mRNA<br>[Source:RefSeq_dna;Acc:XR_016722]                      |  | 16.349 | -11.43 | 0.0375822  | 446  | 16 | 1 | 38 [+] |
| <b>FAM62C</b> | Family with sequence similarity 62 (C2 domain containing), member C<br>[Source:RefSeq_peptide;Acc:NP_114119] |  | 15.545 | -9.98  | 0.00598156 | 1000 | 18 | 1 | 23 [+] |
| <b>FAM71C</b> | Protein FAM71C.<br>[Source:Uniprot/SWISSPROT;Acc:Q8NEG0]                                                     |  | 16.13  | -20.25 | 0.00268232 | 648  | 13 | 2 | 24 [+] |
| <b>FAM73B</b> | Family with sequence similarity 73, member B (FAM73B), mRNA<br>[Source:RefSeq_dna;Acc:NM_032809]             |  | 15.573 | -18.69 | 0.00079024 | 1629 | 12 | 2 | 13 [+] |
| <b>FAM80A</b> | Ribosomal protein S6 modification-like protein A.<br>[Source:Uniprot/SWISSPROT;Acc:Q8IXN7]                   |  | 15.725 | -14.32 | 0.00220158 | 205  | 11 | 8 | 47 [+] |
| <b>FAM82A</b> | Family with sequence similarity 82, member A (FAM82A), mRNA<br>[Source:RefSeq_dna;Acc:NM_144713]             |  | 16.404 | -12.02 | 0.036402   | 141  | 7  | 1 | 23 [+] |

|                |                                                                                                                                                                                                   |  |        |        |           |     |    |   |        |
|----------------|---------------------------------------------------------------------------------------------------------------------------------------------------------------------------------------------------|--|--------|--------|-----------|-----|----|---|--------|
| <b>FAM82A</b>  | Family with sequence similarity 82, member A (FAM82A), mRNA<br>[Source:RefSeq_dna;Acc:NM_144713]                                                                                                  |  | 16.404 | -12.02 | 0.036402  | 147 | 9  | 4 | 34 [+] |
| <b>FANCE</b>   | Fanconi anemia group E protein (Protein FACE).<br>[Source:Uniprot/SWISSPROT;Acc:Q9HB96]                                                                                                           |  | 15.309 | -17.44 | 0.012053  | 759 | 23 | 3 | 39 [+] |
| <b>FAS</b>     | Tumor necrosis factor receptor superfamily member 6 precursor (FASLG receptor) (Apoptosis-mediating surface antigen FAS) (Apo-1 antigen) (CD95 antigen).<br>[Source:Uniprot/SWISSPROT;Acc:P25445] |  | 15.491 | -11.84 | 0.0394081 | 505 | 21 | 3 | 52 [+] |
| <b>FASTKD1</b> | FAST kinase domain-containing protein 1.<br>[Source:Uniprot/SWISSPROT;Acc:Q53R41]                                                                                                                 |  | 16.404 | -10.42 | 5.50E-05  | 66  | 3  | 4 | 11 [+] |
| <b>FASTKD1</b> | FAST kinase domain-containing protein 1.<br>[Source:Uniprot/SWISSPROT;Acc:Q53R41]                                                                                                                 |  | 16.404 | -10.42 | 0.0357474 | 70  | 3  | 1 | 10 [+] |
| <b>FCRL6</b>   | Fc receptor-like protein 6 precursor (FcR-like protein 6) (FcRL6) (Fc receptor homolog 6) (FcRH6) (IFGP6).<br>[Source:Uniprot/SWISSPROT;Acc:Q6DN72]                                               |  | 16.404 | -15.56 | 0.036402  | 220 | 12 | 1 | 45 [+] |



|              |                                                                                                                                                                                                       |  |        |        |            |     |    |   |        |
|--------------|-------------------------------------------------------------------------------------------------------------------------------------------------------------------------------------------------------|--|--------|--------|------------|-----|----|---|--------|
| <b>FDFT1</b> | Squalene synthetase (EC 2.5.1.21) (SQS) (SS) (Farnesyl-diphosphate farnesyltransferase) (FPP:FPP farnesyltransferase).<br>[Source:Uniprot/SWISSPROT;Acc:P37268]                                       |  | 15.485 | -14.07 | 0.00011581 | 700 | 18 | 3 | 28 [+] |
| <b>FDFT1</b> | Squalene synthetase (EC 2.5.1.21) (SQS) (SS) (Farnesyl-diphosphate farnesyltransferase) (FPP:FPP farnesyltransferase).<br>[Source:Uniprot/SWISSPROT;Acc:P37268]                                       |  | 15.488 | -14.07 | 0.00398364 | 699 | 16 | 1 | 24 [+] |
| <b>FDXR</b>  | NADPH:adrenodoxin oxidoreductase, mitochondrial precursor (EC 1.18.1.2) (Adrenodoxin reductase) (AR) (Ferredoxin reductase) (Ferredoxin--NADP(+) reductase).<br>[Source:Uniprot/SWISSPROT;Acc:P22570] |  | 16.421 | -15.7  | 0.00091272 | 316 | 19 | 5 | 78 [+] |
| <b>FGB</b>   | Fibrinogen beta chain precursor [Contains: Fibrinopeptide B].<br>[Source:Uniprot/SWISSPROT;Acc:P02675]                                                                                                |  | 16.519 | -21.15 | 0.0014504  | 431 | 18 | 4 | 33 [+] |
| <b>FGFR2</b> | Fibroblast growth factor receptor 2 precursor (EC 2.7.10.1) (FGFR-2) (Keratinocyte growth factor receptor 2) (CD332 antigen).<br>[Source:Uniprot/SWISSPROT;Acc:P21802]                                |  | 17.293 | -19.35 | 0.0157997  | 428 | 16 | 1 | 36 [+] |

|               |                                                                                                                                                                                         |  |        |        |           |     |    |   |        |
|---------------|-----------------------------------------------------------------------------------------------------------------------------------------------------------------------------------------|--|--------|--------|-----------|-----|----|---|--------|
| <b>FHAD1</b>  | Forkhead-associated phosphopeptide-binding domain-containing protein 1 (Fragment).<br>[Source:Uniprot/SPTREMBL;Acc:Q5T2Q6]                                                              |  | 17.111 | -14.35 | 0.0187591 | 483 | 15 | 1 | 32 [+] |
| <b>FIBP</b>   | Acidic fibroblast growth factor intracellular-binding protein (aFGF intracellular-binding protein) (FGF-1 intracellular-binding protein).<br>[Source:Uniprot/SWISSPROT;Acc:O43427]      |  | 16.178 | -13.13 | 0.0439477 | 234 | 14 | 6 | 54 [+] |
| <b>FIGF</b>   | Vascular endothelial growth factor D precursor (VEGF-D) (c-fos-induced growth factor) (FIGF).<br>[Source:Uniprot/SWISSPROT;Acc:O43915]                                                  |  | 15.511 | -14.19 | 0.0313443 | 536 | 20 | 8 | 43 [+] |
| <b>FKBP1A</b> | FK506-binding protein 1A (EC 5.2.1.8) (Peptidyl-prolyl cis-trans isomerase) (PPIase) (Rotamase) (12 kDa FKBP) (FKBP-12) (Immunophilin FKBP12).<br>[Source:Uniprot/SWISSPROT;Acc:P62942] |  | 17.772 | -14.24 | 0.0100448 | 334 | 18 | 1 | 53 [+] |
| <b>FKBP1A</b> | FK506-binding protein 1A (EC 5.2.1.8) (Peptidyl-prolyl cis-trans isomerase) (PPIase) (Rotamase) (12 kDa FKBP) (FKBP-12) (Immunophilin FKBP12).<br>[Source:Uniprot/SWISSPROT;Acc:P62942] |  | 17.469 | -14.24 | 0.0133728 | 390 | 20 | 1 | 47 [+] |

|              |                                                                                                                                                                                                                                                                                                     |  |        |        |            |      |    |   |        |
|--------------|-----------------------------------------------------------------------------------------------------------------------------------------------------------------------------------------------------------------------------------------------------------------------------------------------------|--|--------|--------|------------|------|----|---|--------|
| <b>FNTA</b>  | Protein farnesyltransferase/geranylgeranyltransferase type I alpha subunit (EC 2.5.1.58) (EC 2.5.1.59) (CAAX farnesyltransferase alpha subunit) (Ras proteins prenyltransferase alpha) (FTase-alpha) (Type I protein geranylgeranyltransferase alpha subunit) [Source:Uniprot/SWISSPROT;Acc:P49354] |  | 15.515 | -13.61 | 0.00631207 | 498  | 21 | 5 | 50 [+] |
| <b>FOS</b>   | Proto-oncogene protein c-fos (Cellular oncogene fos) (G0/G1 switch regulatory protein 7). [Source:Uniprot/SWISSPROT;Acc:P01100]                                                                                                                                                                     |  | 16.235 | -18.22 | 0.0319215  | 805  | 18 | 8 | 30 [+] |
| <b>FOXP1</b> | Forkhead box protein P1. [Source:Uniprot/SWISSPROT;Acc:Q9H334]                                                                                                                                                                                                                                      |  | 15.46  | -11.47 | 0.00356883 | 1000 | 13 | 1 | 15 [+] |
| <b>FREM2</b> | FRAS1-related extracellular matrix protein 2 precursor (ECM3 homolog). [Source:Uniprot/SWISSPROT;Acc:Q5SZK8]                                                                                                                                                                                        |  | 15.533 | -18.97 | 0.00611315 | 1000 | 18 | 4 | 27 [+] |
| <b>FSHR</b>  | Follicle-stimulating hormone receptor precursor (FSH-R) (Follitropin receptor). [Source:Uniprot/SWISSPROT;Acc:P23945]                                                                                                                                                                               |  | 15.725 | -11.2  | 0.00292492 | 220  | 14 | 6 | 51 [+] |

|                   |                                                                                                                                                                                                                                                                                            |  |        |        |            |      |    |   |        |
|-------------------|--------------------------------------------------------------------------------------------------------------------------------------------------------------------------------------------------------------------------------------------------------------------------------------------|--|--------|--------|------------|------|----|---|--------|
| <b>FVT1</b>       | 3-Ketodihydrosphingosine reductase precursor (EC 1.1.1.102) (3-dehydrosphinganine reductase) (KDS reductase) (Follicular variant translocation protein 1) (FVT-1).<br>[Source:Uniprot/SWISSPROT;Acc:Q06136]                                                                                |  | 15.912 | -20.11 | 0.00512571 | 1182 | 18 | 7 | 31 [+] |
| <b>GABRA1</b>     | $\gamma$ -Aminobutyric-acid receptor subunit $\alpha$ -1 precursor (GABA(A) receptor subunit $\alpha$ -1).<br>[Source:Uniprot/SWISSPROT;Acc:P14867]                                                                                                                                        |  | 16.677 | -19.06 | 0.0218804  | 1000 | 9  | 8 | 13 [+] |
| <b>GCSI_HUMAN</b> | Mannosyl-oligosaccharide glucosidase (EC 3.2.1.106) (Processing A- glucosidase I).<br>[Source:Uniprot/SWISSPROT;Acc:Q13724]                                                                                                                                                                |  | 16.857 | -12.49 | 0.00105775 | 198  | 11 | 8 | 38 [+] |
| <b>GEMIN8</b>     | Gem-associated protein 8 (Protein FAM51A1).<br>[Source:Uniprot/SWISSPROT;Acc:Q9NWZ8]                                                                                                                                                                                                       |  | 15.725 | -16.18 | 0.00012807 | 241  | 15 | 5 | 69 [+] |
| <b>GGPS1</b>      | Geranylgeranyl pyrophosphate synthetase (GGPP synthetase) (GGPPSase) (Geranylgeranyl diphosphate synthase) [Includes: Dimethylallyltranstransferase (EC 2.5.1.1); Geranyltranstransferase (EC 2.5.1.10); Farnesyltranstransferase (EC 2.5.1.29)].<br>[Source:Uniprot/SWISSPROT;Acc:O95749] |  | 16.67  | -11.84 | 4.37E-05   | 320  | 18 | 3 | 62 [+] |

|                |                                                                                                                                                                                      |  |        |        |            |      |    |   |        |
|----------------|--------------------------------------------------------------------------------------------------------------------------------------------------------------------------------------|--|--------|--------|------------|------|----|---|--------|
| <b>GHITM</b>   | Growth hormone-inducible transmembrane protein (Dermal papilla-derived protein 2) (Transmembrane BAX inhibitor motif-containing protein 5).<br>[Source:Uniprot/SWISSPROT;Acc:Q9H3K2] |  | 15.424 | -10.15 | 0.0193679  | 897  | 24 | 5 | 35 [+] |
| <b>GLB1L</b>   | Galactosidase, $\beta$ 1-like<br>[Source:RefSeq_peptide;Acc:NP_078782]                                                                                                               |  | 15.727 | -18.21 | 0.0352741  | 461  | 21 | 6 | 60 [+] |
| <b>GLT8D1</b>  | Glycosyltransferase 8 domain containing 1<br>[Source:RefSeq_peptide;Acc:NP_690909]                                                                                                   |  | 16.441 | -18.02 | 0.00101023 | 353  | 20 | 8 | 61 [+] |
| <b>GOLGA8A</b> | Golgin subfamily A member 8A/B (Golgi autoantigen golgin-67) (88 kDa Golgi protein) (Gm88 autoantigen).<br>[Source:Uniprot/SWISSPROT;Acc:Q9NZW0]                                     |  | 16.065 | -17.28 | 0.0499184  | 152  | 9  | 2 | 24 [+] |
| <b>GOT1</b>    | Aspartate aminotransferase, cytoplasmic (EC 2.6.1.1) (Transaminase A) (Glutamate oxaloacetate transaminase 1).<br>[Source:Uniprot/SWISSPROT;Acc:P17174]                              |  | 15.719 | -15.44 | 0.0013194  | 646  | 20 | 6 | 38 [+] |
| <b>GOT2</b>    | Aspartate aminotransferase, mitochondrial precursor (EC 2.6.1.1) (Transaminase A) (Glutamate oxaloacetate transaminase 2).<br>[Source:Uniprot/SWISSPROT;Acc:P00505]                  |  | 15.674 | -17.04 | 0.0024425  | 1038 | 12 | 2 | 16 [+] |

|               |                                                                                                                                                       |  |        |        |            |      |    |   |        |
|---------------|-------------------------------------------------------------------------------------------------------------------------------------------------------|--|--------|--------|------------|------|----|---|--------|
| <b>GPBP1</b>  | Vasculin<br>[Source:RefSeq_peptide;Acc:NP_075064]                                                                                                     |  | 16.229 | -10.27 | 0.0419452  | 330  | 16 | 1 | 43 [+] |
| <b>GPR174</b> | Probable G-protein coupled receptor 174.<br>[Source:Uniprot/SWISSPROT;Acc:Q9BXC1]                                                                     |  | 15.838 | -8.13  | 0.00380965 | 220  | 11 | 3 | 40 [+] |
| <b>GPR176</b> | Probable G-protein coupled receptor 176 (HB-954).<br>[Source:Uniprot/SWISSPROT;Acc:Q14439]                                                            |  | 15.988 | -17.12 | 0.00552794 | 402  | 23 | 6 | 54 [+] |
| <b>GPR177</b> | Integral membrane protein GPR177 precursor (Protein wntless homolog) (Putative NFkB-activating protein 373).<br>[Source:Uniprot/SWISSPROT;Acc:Q5T9L3] |  | 16.383 | -17.23 | 0.0364616  | 638  | 21 | 1 | 29 [+] |
| <b>GPR22</b>  | Probable G-protein coupled receptor 22.<br>[Source:Uniprot/SWISSPROT;Acc:Q99680]                                                                      |  | 16.404 | -10.72 | 0.0186462  | 291  | 17 | 6 | 48 [+] |
| <b>GPR78</b>  | Probable G-protein coupled receptor 78.<br>[Source:Uniprot/SWISSPROT;Acc:Q96P69]                                                                      |  | 16.497 | -16.92 | 0.033371   | 1103 | 7  | 1 | 9 [+]  |
| <b>GPSM1</b>  | G-protein-signaling modulator 1 (Activator of G-protein signaling 3).<br>[Source:Uniprot/SWISSPROT;Acc:Q86YR5]                                        |  | 17.797 | -13.82 | 9.71E-05   | 369  | 18 | 2 | 65 [+] |
| <b>GPSM2</b>  | G-protein-signaling modulator 2 (Mosaic protein LGN).<br>[Source:Uniprot/SWISSPROT;Acc:P81274]                                                        |  | 15.741 | -9.76  | 0.00888063 | 481  | 20 | 3 | 38 [+] |

|               |                                                                                                                                                                  |  |        |        |            |      |    |   |        |
|---------------|------------------------------------------------------------------------------------------------------------------------------------------------------------------|--|--------|--------|------------|------|----|---|--------|
| <b>GRIP2</b>  | Glutamate receptor-interacting protein 2 (GRIP2 protein).<br>[Source:Uniprot/SWISSPROT;Acc:Q9C0E4]                                                               |  | 15.334 | -12.47 | 0.00445821 | 1000 | 16 | 1 | 18 [+] |
| <b>GRK5</b>   | G protein-coupled receptor kinase 5 (EC 2.7.11.16) (G protein-coupled receptor kinase GRK5).<br>[Source:Uniprot/SWISSPROT;Acc:P34947]                            |  | 16.942 | -13.41 | 0.00141653 | 474  | 20 | 1 | 46 [+] |
| <b>GRM1</b>   | Metabotropic glutamate receptor 1 precursor (mGluR1).<br>[Source:Uniprot/SWISSPROT;Acc:Q13255]                                                                   |  | 18.554 | -18.86 | 0.00478961 | 204  | 11 | 1 | 46 [+] |
| <b>GTF2E2</b> | Transcription initiation factor IIE subunit beta (TFIIE-beta) (General transcription factor IIE subunit 2).<br>[Source:Uniprot/SWISSPROT;Acc:P29084]             |  | 17.019 | -16.61 | 0.00479664 | 558  | 27 | 5 | 56 [+] |
| <b>GTPBP3</b> | tRNA modification GTPase GTPBP3, mitochondrial precursor (GTP-binding protein 3) (Mitochondrial GTP-binding protein 1).<br>[Source:Uniprot/SWISSPROT;Acc:Q969Y2] |  | 16.424 | -14.75 | 0.0357285  | 1000 | 14 | 1 | 18 [+] |
| <b>GUCA1B</b> | Guanylyl cyclase-activating protein 2 (GCAP 2) (Guanylate cyclase activator 1B).<br>[Source:Uniprot/SWISSPROT;Acc:Q9UMX6]                                        |  | 15.31  | -16.75 | 0.00899486 | 1530 | 15 | 4 | 18 [+] |

|               |                                                                                                                                                                             |        |        |            |     |    |   |        |
|---------------|-----------------------------------------------------------------------------------------------------------------------------------------------------------------------------|--------|--------|------------|-----|----|---|--------|
| <b>GZMK</b>   | Granzyme K precursor (EC 3.4.21.-)<br>(Granzyme-3) (NK-tryptase-2) (NK-TRYP-2) (Fragmentin-3).<br>[Source:Uniprot/SWISSPROT;Acc:P49863]                                     | 15.724 | -22.68 | 0.00125305 | 644 | 20 | 5 | 44 [+] |
| <b>GZMK</b>   | Granzyme K precursor (EC 3.4.21.-)<br>(Granzyme-3) (NK-tryptase-2) (NK-TRYP-2) (Fragmentin-3).<br>[Source:Uniprot/SWISSPROT;Acc:P49863]                                     | 17.083 | -22.68 | 0.0192564  | 206 | 12 | 1 | 40 [+] |
| <b>HAO1</b>   | Hydroxyacid oxidase 1 (EC 1.1.3.15)<br>(HAOX1) (Glycolate oxidase)<br>(GOX).<br>[Source:Uniprot/SWISSPROT;Acc:Q9UJM8]                                                       | 16.15  | -11.91 | 0.004077   | 610 | 26 | 9 | 45 [+] |
| <b>HCN2</b>   | Potassium/sodium hyperpolarization-activated cyclic nucleotide-gated channel 2 (Brain cyclic nucleotide-gated channel 2) (BCNG-2).<br>[Source:Uniprot/SWISSPROT;Acc:Q9UL51] | 17.179 | -21.14 | 0.00106629 | 683 | 20 | 4 | 38 [+] |
| <b>HCRTR1</b> | Orexin receptor type 1 (Ox1r)<br>(Hypocretin receptor type 1).<br>[Source:Uniprot/SWISSPROT;Acc:O43613]                                                                     | 16.63  | -20.7  | 0.00195368 | 211 | 14 | 4 | 60 [+] |
| <b>HEATR3</b> | HEAT repeat-containing protein 3.<br>[Source:Uniprot/SWISSPROT;Acc:Q7Z4Q2]                                                                                                  | 16.321 | -10.07 | 0.00018778 | 401 | 20 | 5 | 54 [+] |



|                   |                                                                                                                                                                                        |  |        |        |            |      |    |   |        |
|-------------------|----------------------------------------------------------------------------------------------------------------------------------------------------------------------------------------|--|--------|--------|------------|------|----|---|--------|
| <b>HEMGN</b>      | Hemogen (Hemopoietic gene protein) (Negative differentiation regulator protein) (Erythroid differentiation-associated gene protein) (EDAG-1).<br>[Source:Uniprot/SWISSPROT;Acc:Q9BXL5] |  | 16.625 | -14.32 | 0.0296103  | 591  | 19 | 1 | 25 [+] |
| <b>HEMGN</b>      | Hemogen (Hemopoietic gene protein) (Negative differentiation regulator protein) (Erythroid differentiation-associated gene protein) (EDAG-1).<br>[Source:Uniprot/SWISSPROT;Acc:Q9BXL5] |  | 16.618 | -14.32 | 0.0298006  | 593  | 20 | 5 | 29 [+] |
| <b>HEPHL1</b>     | Hephaestin-like protein 1 (Fragment).<br>[Source:Uniprot/SPTREMBL;Acc:Q6MZM0]                                                                                                          |  | 15.34  | -13.63 | 0.00441155 | 1857 | 4  | 1 | 3 [+]  |
| <b>HES6</b>       | Transcription cofactor HES-6 (Hairy and enhancer of split 6) (C-HAIRY1).<br>[Source:Uniprot/SWISSPROT;Acc:Q96HZ4]                                                                      |  | 15.632 | -17.29 | 0.00067815 | 1000 | 24 | 4 | 32 [+] |
| <b>HIG2_HUMAN</b> | Hypoxia-inducible gene 2 protein.<br>[Source:Uniprot/SWISSPROT;Acc:Q9Y5L2]                                                                                                             |  | 16.038 | -15.2  | 0.0498608  | 956  | 15 | 3 | 24 [+] |
| <b>HIGD2A</b>     | HIG1 domain family member 2A.<br>[Source:Uniprot/SWISSPROT;Acc:Q9BW72]                                                                                                                 |  | 17.649 | -13.48 | 0.00795678 | 262  | 14 | 6 | 57 [+] |

|                 |                                                                                                                                         |  |        |        |            |     |    |   |        |
|-----------------|-----------------------------------------------------------------------------------------------------------------------------------------|--|--------|--------|------------|-----|----|---|--------|
| <b>HIGD2BP</b>  | HIG1 domain family, member 2B pseudogene (HIGD2BP) on chromosome 15<br>[Source:RefSeq_dna;Acc:NR_002780]                                |  | 16.97  | -13.34 | 0.0214202  | 240 | 11 | 2 | 31 [+] |
| <b>HIST1H3H</b> | Histone H2A type 1 (H2A.1).<br>[Source:Uniprot/SWISSPROT;Acc:P0C0S8]                                                                    |  | 17.73  | -18.42 | 0.0104547  | 361 | 18 | 1 | 55 [+] |
| <b>HIST1H3H</b> | Histone H2A type 1 (H2A.1).<br>[Source:Uniprot/SWISSPROT;Acc:P0C0S8]                                                                    |  | 16.26  | -18.42 | 0.0416221  | 816 | 18 | 1 | 29 [+] |
| <b>HLA-B</b>    | HLA class I histocompatibility antigen, B-7 alpha chain precursor (MHC class I antigen B*7).<br>[Source:Uniprot/SWISSPROT;Acc:P01889]   |  | 15.851 | -13.14 | 0.00363344 | 435 | 15 | 1 | 26 [+] |
| <b>HLA-C</b>    | HLA class I histocompatibility antigen, Cw-7 alpha chain precursor (MHC class I antigen Cw*7).<br>[Source:Uniprot/SWISSPROT;Acc:P10321] |  | 15.887 | -13.14 | 0.00341427 | 426 | 14 | 1 | 21 [+] |
| <b>HLA-DRA</b>  | Major histocompatibility complex, class II, DR alpha precursor<br>[Source:RefSeq_peptide;Acc:NP_061984]                                 |  | 15.781 | -16.74 | 0.00144103 | 548 | 23 | 4 | 53 [+] |
| <b>HLA-J</b>    | MHC class I HLA-J antigen (Fragment).<br>[Source:Uniprot/SPTREMBL;Acc:Q30175]                                                           |  | 16.236 | -13.51 | 0.0425829  | 506 | 19 | 1 | 38 [+] |

|              |                                                                                                                                                                              |  |        |        |            |     |    |   |        |
|--------------|------------------------------------------------------------------------------------------------------------------------------------------------------------------------------|--|--------|--------|------------|-----|----|---|--------|
| <b>HMBS</b>  | Porphobilinogen deaminase (EC 2.5.1.61) (Hydroxymethylbilane synthase) (HMBS) (Pre-uroporphyrinogen synthase) (PBG-D).<br>[Source:Uniprot/SWISSPROT;Acc:P08397]              |  | 17.988 | -15.57 | 6.83E-06   | 266 | 17 | 6 | 61 [+] |
| <b>HMGB2</b> | High mobility group protein B2 (High mobility group protein 2) (HMG- 2).<br>[Source:Uniprot/SWISSPROT;Acc:P26583]                                                            |  | 17.824 | -19.77 | 0.00333138 | 372 | 20 | 6 | 60 [+] |
| <b>HMGCL</b> | Hydroxymethylglutaryl-CoA lyase, mitochondrial precursor (EC 4.1.3.4) (HMG-CoA lyase) (HL) (3-hydroxy-3-methylglutarate-CoA lyase).<br>[Source:Uniprot/SWISSPROT;Acc:P35914] |  | 15.757 | -13.03 | 0.0001345  | 631 | 24 | 5 | 37 [+] |
| <b>HMGCL</b> | Hydroxymethylglutaryl-CoA lyase, mitochondrial precursor (EC 4.1.3.4) (HMG-CoA lyase) (HL) (3-hydroxy-3-methylglutarate-CoA lyase).<br>[Source:Uniprot/SWISSPROT;Acc:P35914] |  | 15.909 | -13.03 | 0.00015228 | 576 | 17 | 1 | 23 [+] |
| <b>HMGCL</b> | Hydroxymethylglutaryl-CoA lyase, mitochondrial precursor (EC 4.1.3.4) (HMG-CoA lyase) (HL) (3-hydroxy-3-methylglutarate-CoA lyase).<br>[Source:Uniprot/SWISSPROT;Acc:P35914] |  | 15.903 | -13.03 | 0.00015455 | 578 | 17 | 1 | 23 [+] |

|                |                                                                                                                                                                         |        |        |            |      |    |   |        |
|----------------|-------------------------------------------------------------------------------------------------------------------------------------------------------------------------|--------|--------|------------|------|----|---|--------|
| <b>HOMER2</b>  | Homer protein homolog 2 (Homer-2) (Cupidin).<br>[Source:Uniprot/SWISSPROT;Acc:Q9NSB8]                                                                                   | 15.983 | -14.22 | 0.0164537  | 729  | 23 | 7 | 43 [+] |
| <b>HOOK3</b>   | Hook homolog 3 (hHK3).<br>[Source:Uniprot/SWISSPROT;Acc:Q86VS8]                                                                                                         | 17.417 | -23.66 | 0.0125022  | 1286 | 17 | 5 | 17 [+] |
| <b>HOXB5</b>   | Homeobox protein Hox-B5 (Hox-2A) (HHO.C10) (HU-1).<br>[Source:Uniprot/SWISSPROT;Acc:P09067]                                                                             | 16.234 | -22.96 | 7.88E-06   | 951  | 16 | 7 | 29 [+] |
| <b>HS2ST1</b>  | Heparan sulfate 2-O-sulfotransferase 1 (EC 2.8.2.-) (2-O- sulfotransferase) (2OST).<br>[Source:Uniprot/SWISSPROT;Acc:Q7LGA3]                                            | 16.389 | -19.81 | 0.0369292  | 1025 | 12 | 1 | 12 [+] |
| <b>HS2ST1</b>  | Heparan sulfate 2-O-sulfotransferase 1 (EC 2.8.2.-) (2-O- sulfotransferase) (2OST).<br>[Source:Uniprot/SWISSPROT;Acc:Q7LGA3]                                            | 16.384 | -19.81 | 0.0370935  | 1028 | 12 | 1 | 12 [+] |
| <b>HSD11B1</b> | Corticosteroid 11-beta-dehydrogenase isozyme 1 (EC 1.1.1.146) (11-DH) (11-beta-hydroxysteroid dehydrogenase 1) (11-beta-HSD1).<br>[Source:Uniprot/SWISSPROT;Acc:P28845] | 16.404 | -8.67  | 0.00053249 | 343  | 15 | 4 | 64 [+] |

|                  |                                                                                                                                                                                                                                                                              |  |        |        |            |      |    |   |        |
|------------------|------------------------------------------------------------------------------------------------------------------------------------------------------------------------------------------------------------------------------------------------------------------------------|--|--------|--------|------------|------|----|---|--------|
| <b>HSD3B1</b>    | 3β-Hydroxysteroid dehydrogenase/δ5->4-isomerase type I (3β-HSD I) (Trophoblast antigen FDO161G) [Includes: 3β-hydroxy-δ(5)-steroid dehydrogenase (EC 1.1.1.145) (3-beta-hydroxy-5-ene steroid dehydrogenase) (Progesterone reductase); [Source:Uniprot/SWISSPROT;Acc:P14060] |  | 16.941 | -12.01 | 0.0219994  | 409  | 14 | 1 | 33 [+] |
| <b>HSP90AB1</b>  | Heat shock protein HSP 90-beta (HSP 84) (HSP 90). [Source:Uniprot/SWISSPROT;Acc:P08238]                                                                                                                                                                                      |  | 18.327 | -20.87 | 0.00593613 | 285  | 17 | 1 | 53 [+] |
| <b>HSP90AB1</b>  | Heat shock protein HSP 90-beta (HSP 84) (HSP 90). [Source:Uniprot/SWISSPROT;Acc:P08238]                                                                                                                                                                                      |  | 16.13  | -20.87 | 0.0111264  | 1000 | 16 | 2 | 18 [+] |
| <b>HSP90AB1</b>  | Heat shock protein HSP 90-beta (HSP 84) (HSP 90). [Source:Uniprot/SWISSPROT;Acc:P08238]                                                                                                                                                                                      |  | 16.13  | -20.87 | 0.0469724  | 1000 | 11 | 1 | 13 [+] |
| <b>HSP90AB1</b>  | Heat shock protein HSP 90-beta (HSP 84) (HSP 90). [Source:Uniprot/SWISSPROT;Acc:P08238]                                                                                                                                                                                      |  | 16.13  | -20.87 | 0.0469724  | 1000 | 12 | 1 | 12 [+] |
| <b>HSP90AB6P</b> | Heat shock protein 90Bf. [Source:Uniprot/SPTREMBL;Acc:Q58FF4]                                                                                                                                                                                                                |  | 16.645 | -17.01 | 0.0290639  | 1000 | 6  | 2 | 8 [+]  |

|                |                                                                                                                                                                                                                  |  |        |        |            |      |    |   |        |
|----------------|------------------------------------------------------------------------------------------------------------------------------------------------------------------------------------------------------------------|--|--------|--------|------------|------|----|---|--------|
| <b>HSP90B1</b> | Endoplasmic precursor (Heat shock protein 90 kDa beta member 1) (94 kDa glucose-regulated protein) (GRP94) (gp96 homolog) (Tumor rejection antigen 1).<br>[Source:Uniprot/SWISSPROT;Acc:P14625]                  |  | 15.838 | -11.74 | 0.00680585 | 239  | 12 | 8 | 49 [+] |
| <b>HSPA1L</b>  | Heat shock 70 kDa protein 1L (Heat shock 70 kDa protein 1-like) (Heat shock 70 kDa protein 1-Hom) (HSP70-Hom).<br>[Source:Uniprot/SWISSPROT;Acc:P34931]                                                          |  | 17.132 | -14.85 | 0.00094299 | 310  | 16 | 6 | 43 [+] |
| <b>ID4</b>     | DNA-binding protein inhibitor ID-4 (Inhibitor of DNA binding 4).<br>[Source:Uniprot/SWISSPROT;Acc:P47928]                                                                                                        |  | 15.455 | -18.24 | 0.00801788 | 1489 | 8  | 3 | 9 [+]  |
| <b>IDH1</b>    | Isocitrate dehydrogenase [NADP] cytoplasmic (EC 1.1.1.42) (Cytosolic NADP-isocitrate dehydrogenase) (Oxalosuccinate decarboxylase) (IDH) (NADP(+)-specific ICDH) (IDP).<br>[Source:Uniprot/SWISSPROT;Acc:O75874] |  | 16.143 | -15.65 | 2.92E-05   | 849  | 17 | 5 | 24 [+] |
| <b>IFNA17</b>  | Interferon alpha-17 precursor (Interferon alpha-I) (Interferon alpha-T) (Interferon alpha-88).<br>[Source:Uniprot/SWISSPROT;Acc:P01571]                                                                          |  | 17.483 | -13.76 | 0.0131978  | 361  | 14 | 1 | 44 [+] |

|                 |                                                                                                                                                                                                    |  |        |        |            |      |    |   |        |
|-----------------|----------------------------------------------------------------------------------------------------------------------------------------------------------------------------------------------------|--|--------|--------|------------|------|----|---|--------|
| <b>IFNG</b>     | Interferon gamma precursor (IFN-gamma) (Immune interferon).<br>[Source:Uniprot/SWISSPROT;Acc:P01579]                                                                                               |  | 16.307 | -19.1  | 0.0127219  | 584  | 16 | 7 | 32 [+] |
| <b>IFT74</b>    | Intraflagellar transport 74 homolog (Coiled-coil domain-containing protein 2) (Capillary morphogenesis protein 1) (CMG-1).<br>[Source:Uniprot/SWISSPROT;Acc:Q96LB3]                                |  | 18.554 | -13.49 | 0.00478961 | 194  | 9  | 6 | 34 [+] |
| <b>IFT80</b>    | Tripartite motif-containing protein 59 (Tumor suppressor TSBF-1) (RING finger protein 104).<br>[Source:Uniprot/SWISSPROT;Acc:Q8IWR1]                                                               |  | 15.365 | -14.2  | 0.00817918 | 324  | 17 | 2 | 55 [+] |
| <b>IGLV2-23</b> | Immunoglobulin Lambda light chain V gene segment<br>[Source:IMGT/GENE_DB;Acc:IGLV2-23]                                                                                                             |  | 16.994 | -20.53 | 0.0209343  | 1000 | 15 | 1 | 13 [+] |
| <b>IL12RB1</b>  | Interleukin-12 receptor beta-1 chain precursor (IL-12R-beta1) (Interleukin-12 receptor beta) (IL-12 receptor beta component) (IL- 12RB1) (CD212 antigen).<br>[Source:Uniprot/SWISSPROT;Acc:P42701] |  | 15.454 | -16.03 | 0.0028744  | 1000 | 19 | 3 | 27 [+] |
| <b>IL18R1</b>   | Interleukin-18 receptor 1 precursor (IL1 receptor-related protein) (IL-1Rrp) (CD218a antigen) (CDw218a).<br>[Source:Uniprot/SWISSPROT;Acc:Q13478]                                                  |  | 16.026 | -20.09 | 0.0494748  | 1872 | 5  | 2 | 6 [+]  |

|               |                                                                                                                                                                                                       |  |        |        |            |     |    |   |        |
|---------------|-------------------------------------------------------------------------------------------------------------------------------------------------------------------------------------------------------|--|--------|--------|------------|-----|----|---|--------|
| <b>IL1R1</b>  | Interleukin-1 receptor type I precursor (IL-1R-1) (IL-1RT1) (IL-1R- alpha) (p80) (CD121a antigen). [Source:Uniprot/SWISSPROT;Acc:P14778]                                                              |  | 15.499 | -11.59 | 0.00166844 | 137 | 7  | 4 | 22 [+] |
| <b>IL2</b>    | Interleukin-2 precursor (IL-2) (T-cell growth factor) (TCGF) (Aldesleukin). [Source:Uniprot/SWISSPROT;Acc:P60568]                                                                                     |  | 19.119 | -17.37 | 0.00061307 | 277 | 15 | 5 | 47 [+] |
| <b>IMPG1</b>  | Interphotoreceptor matrix proteoglycan 1 precursor (Interphotoreceptor matrix proteoglycan of 150 kDa) (IPM-150) (Sialoprotein associated with cones and rods). [Source:Uniprot/SWISSPROT;Acc:Q17R60] |  | 15.389 | -12.85 | 0.0170531  | 744 | 17 | 3 | 32 [+] |
| <b>INCENP</b> | Inner centromere protein. [Source:Uniprot/SWISSPROT;Acc:Q9NQS7]                                                                                                                                       |  | 16.356 | -12.48 | 0.00290338 | 348 | 20 | 5 | 86 [+] |
| <b>ING5</b>   | Inhibitor of growth protein 5 (p28ING5). [Source:Uniprot/SWISSPROT;Acc:Q8WYH8]                                                                                                                        |  | 16.102 | -12.11 | 0.0470817  | 454 | 17 | 1 | 39 [+] |
| <b>INPP4B</b> | Type II inositol-3,4-bisphosphate 4-phosphatase (EC 3.1.3.66) (Inositol polyphosphate 4-phosphatase type II). [Source:Uniprot/SWISSPROT;Acc:O15327]                                                   |  | 15.515 | -13.22 | 0.00842111 | 749 | 20 | 3 | 30 [+] |



|              |                                                                                                                                                                                                           |  |        |        |            |      |    |   |        |
|--------------|-----------------------------------------------------------------------------------------------------------------------------------------------------------------------------------------------------------|--|--------|--------|------------|------|----|---|--------|
| <b>IPPK</b>  | Inositol-pentakisphosphate 2-kinase (EC 2.7.1.158) (Inositol- 1,3,4,5,6-pentakisphosphate 2-kinase) (Ins(1,3,4,5,6)P5 2-kinase) (InsP5 2-kinase) (IPK1 homolog).<br>[Source:Uniprot/SWISSPROT;Acc:Q9H8X2] |  | 18.18  | -14.04 | 0.00284642 | 305  | 15 | 1 | 48 [+] |
| <b>IQCA</b>  | IQ and AAA domain-containing protein.<br>[Source:Uniprot/SWISSPROT;Acc:Q86XH1]                                                                                                                            |  | 17.087 | -21.77 | 0.0191817  | 1029 | 8  | 1 | 9 [+]  |
| <b>IQCF1</b> | IQ domain-containing protein F1.<br>[Source:Uniprot/SWISSPROT;Acc:Q8N6M8]                                                                                                                                 |  | 16.13  | -14.74 | 0.0469724  | 1000 | 16 | 3 | 17 [+] |
| <b>ITFG1</b> | T-cell immunomodulatory protein precursor (Protein TIP) (Integrin alpha FG-GAP repeat-containing protein 1).<br>[Source:Uniprot/SWISSPROT;Acc:Q8TB96]                                                     |  | 15.684 | -14.86 | 0.0146537  | 316  | 16 | 6 | 62 [+] |
| <b>ITGA4</b> | Integrin alpha-4 precursor (Integrin alpha-IV) (VLA-4) (CD49d antigen).<br>[Source:Uniprot/SWISSPROT;Acc:P13612]                                                                                          |  | 16.41  | -12.91 | 0.036196   | 367  | 17 | 1 | 34 [+] |
| <b>ITGAL</b> | Integrin alpha-L precursor (Leukocyte adhesion glycoprotein LFA-1 alpha chain) (LFA-1A) (Leukocyte function-associated molecule 1 alpha chain) (CD11a antigen).<br>[Source:Uniprot/SWISSPROT;Acc:P20701]  |  | 15.543 | -27.5  | 0.0437751  | 1285 | 18 | 3 | 27 [+] |

|              |                                                                                                                                                                                                  |  |        |        |            |      |    |   |        |
|--------------|--------------------------------------------------------------------------------------------------------------------------------------------------------------------------------------------------|--|--------|--------|------------|------|----|---|--------|
| <b>ITGB8</b> | Integrin beta-8 precursor.<br>[Source:Uniprot/SWISSPROT;Acc:P26012]                                                                                                                              |  | 15.786 | -10.98 | 0.00954304 | 799  | 20 | 7 | 35 [+] |
| <b>ITLN1</b> | Intelectin-1 precursor (Intestinal lactoferrin receptor) (Galactofuranose-binding lectin) (Endothelial lectin HL-1) (Omentin).<br>[Source:Uniprot/SWISSPROT;Acc:Q8WWA0]                          |  | 16.404 | -19.59 | 0.0357474  | 122  | 6  | 3 | 19 [+] |
| <b>ITPR2</b> | Inositol 1,4,5-trisphosphate receptor type 2 (Type 2 inositol 1,4,5-trisphosphate receptor) (Type 2 InsP3 receptor) (IP3 receptor isoform 2) (InsP3R2).<br>[Source:Uniprot/SWISSPROT;Acc:Q14571] |  | 16.545 | -18.19 | 0.031907   | 1000 | 12 | 1 | 14 [+] |
| <b>ITSN2</b> | Intersectin-2 (SH3 domain-containing protein 1B) (SH3P18) (SH3P18-like WASP-associated protein).<br>[Source:Uniprot/SWISSPROT;Acc:Q9NZM3]                                                        |  | 16.988 | -20.1  | 0.0204496  | 762  | 19 | 6 | 27 [+] |
| <b>ITSN2</b> | Intersectin-2 (SH3 domain-containing protein 1B) (SH3P18) (SH3P18-like WASP-associated protein).<br>[Source:Uniprot/SWISSPROT;Acc:Q9NZM3]                                                        |  | 16.993 | -20.1  | 0.0207409  | 760  | 10 | 1 | 13 [+] |

|               |                                                                                                                                                                                                                                                                                                       |  |        |        |           |     |    |   |        |
|---------------|-------------------------------------------------------------------------------------------------------------------------------------------------------------------------------------------------------------------------------------------------------------------------------------------------------|--|--------|--------|-----------|-----|----|---|--------|
| <b>JMJD2C</b> | JmjC domain-containing histone demethylation protein 3C (EC 1.14.11.-) (Jumonji domain-containing protein 2C) (Gene amplified in squamous cell carcinoma 1 protein) (GASC-1 protein).<br>[Source:Uniprot/SWISSPROT;Acc:Q9H3R0]                                                                        |  | 16.155 | -16.65 | 0.0459    | 892 | 13 | 1 | 14 [+] |
| <b>KCNE2</b>  | Potassium voltage-gated channel subfamily E member 2 (Minimum potassium ion channel-related peptide 1) (Potassium channel subunit beta MiRP1) (MinK-related peptide 1).<br>[Source:Uniprot/SWISSPROT;Acc:Q9Y6J6]                                                                                      |  | 17.196 | -17.5  | 0.0171604 | 288 | 15 | 5 | 55 [+] |
| <b>KCNMA1</b> | Calcium-activated potassium channel subunit alpha 1 (Calcium-activated potassium channel, subfamily M subunit alpha 1) (Maxi K channel) (MaxiK) (BK channel) (K(VCA)alpha) (BKCA alpha) (KCa1.1) (Slowpoke homolog) (Slo homolog) (Slo-alpha) (Slo1) (hSlo).<br>[Source:Uniprot/SWISSPROT;Acc:Q12791] |  | 16.63  | -11.75 | 0.0290295 | 272 | 13 | 1 | 25 [+] |

|                 |                                                                                                                                                                                                                               |        |        |            |      |    |   |        |
|-----------------|-------------------------------------------------------------------------------------------------------------------------------------------------------------------------------------------------------------------------------|--------|--------|------------|------|----|---|--------|
| <b>KCNQ2</b>    | Potassium voltage-gated channel subfamily KQT member 2 (Voltage-gated potassium channel subunit Kv7.2) (Neuroblastoma-specific potassium channel subunit alpha KvLQT2) (KQT-like 2).<br>[Source:Uniprot/SWISSPROT;Acc:O43526] | 16.065 | -13.3  | 0.0499184  | 197  | 12 | 1 | 41 [+] |
| <b>KDELR3</b>   | ER lumen protein retaining receptor 3 (KDEL receptor 3) (KDEL endoplasmic reticulum protein retention receptor 3).<br>[Source:Uniprot/SWISSPROT;Acc:O43731]                                                                   | 15.389 | -10.26 | 6.17E-05   | 904  | 17 | 3 | 21 [+] |
| <b>KIAA0090</b> | Uncharacterized protein KIAA0090 precursor.<br>[Source:Uniprot/SWISSPROT;Acc:Q8N766]                                                                                                                                          | 17.257 | -10.02 | 0.0163434  | 359  | 16 | 1 | 54 [+] |
| <b>KIAA0195</b> | Uncharacterized protein KIAA0195 (Transmembrane protein 94).<br>[Source:Uniprot/SWISSPROT;Acc:Q12767]                                                                                                                         | 17.328 | -21.74 | 0.00010713 | 748  | 21 | 6 | 30 [+] |
| <b>KIAA0195</b> | Uncharacterized protein KIAA0195 (Transmembrane protein 94).<br>[Source:Uniprot/SWISSPROT;Acc:Q12767]                                                                                                                         | 16.827 | -21.74 | 0.00308792 | 1000 | 12 | 1 | 16 [+] |
| <b>KIAA0196</b> | Uncharacterized protein KIAA0196.<br>[Source:Uniprot/SWISSPROT;Acc:Q12768]                                                                                                                                                    | 17.235 | -11.94 | 0.00186255 | 350  | 19 | 8 | 67 [+] |
| <b>KIAA0241</b> | KIAA0241 (KIAA0241), mRNA<br>[Source:RefSeq_dna;Acc:NM_015060]                                                                                                                                                                | 16.404 | -12.47 | 0.00073789 | 260  | 15 | 6 | 74 [+] |

|                 |                                                                                                       |  |        |        |            |      |    |   |        |
|-----------------|-------------------------------------------------------------------------------------------------------|--|--------|--------|------------|------|----|---|--------|
| <b>KIAA0423</b> | Uncharacterized protein KIAA0423.<br>[Source:Uniprot/SWISSPROT;Acc:Q9Y4F4]                            |  | 16.46  | -17.23 | 0.0111014  | 869  | 17 | 6 | 29 [+] |
| <b>KIAA0460</b> | Uncharacterized protein KIAA0460.<br>[Source:Uniprot/SWISSPROT;Acc:Q5VT52]                            |  | 16.959 | -22.98 | 0.0216319  | 577  | 14 | 1 | 26 [+] |
| <b>KIAA0467</b> | Uncharacterized protein KIAA0467.<br>[Source:Uniprot/SWISSPROT;Acc:Q5T011]                            |  | 16.463 | -10.77 | 0.0046414  | 567  | 15 | 1 | 22 [+] |
| <b>KIAA0528</b> | Uncharacterized protein KIAA0528.<br>[Source:Uniprot/SWISSPROT;Acc:Q86YS7]                            |  | 16.147 | -15.79 | 0.00100294 | 1153 | 13 | 3 | 15 [+] |
| <b>KIAA0802</b> | Uncharacterized protein KIAA0802.<br>[Source:Uniprot/SWISSPROT;Acc:Q9Y4B5]                            |  | 16.728 | -17.13 | 0.00011627 | 488  | 17 | 7 | 28 [+] |
| <b>KIAA1546</b> | KIAA1546 (KIAA1546), mRNA<br>[Source:RefSeq_dna;Acc:NM_017628]                                        |  | 15.474 | -22.89 | 0.00402751 | 1000 | 12 | 1 | 13 [+] |
| <b>KIAA1632</b> | KIAA1632 (KIAA1632), mRNA<br>[Source:RefSeq_dna;Acc:NM_020964]                                        |  | 15.838 | -8.09  | 0.00075495 | 81   | 2  | 3 | 6 [+]  |
| <b>KIAA2013</b> | KIAA2013 (KIAA2013), mRNA<br>[Source:RefSeq_dna;Acc:NM_138346]                                        |  | 15.74  | -16.18 | 0.00010344 | 724  | 19 | 1 | 30 [+] |
| <b>KIF13A</b>   | Kinesin-like protein KIF13A<br>(Kinesin-like protein RBKIN).<br>[Source:Uniprot/SWISSPROT;Acc:Q9H1H9] |  | 16.268 | -20.01 | 0.00816336 | 413  | 19 | 3 | 45 [+] |

|                |                                                                                                                                                                                                                                                |  |        |        |            |      |    |   |        |
|----------------|------------------------------------------------------------------------------------------------------------------------------------------------------------------------------------------------------------------------------------------------|--|--------|--------|------------|------|----|---|--------|
| <b>KIF13A</b>  | Kinesin-like protein KIF13A (Kinesin-like protein RBKIN). [Source:Uniprot/SWISSPROT;Acc:Q9H1H9]                                                                                                                                                |  | 16.26  | -20.01 | 0.0407914  | 415  | 17 | 1 | 29 [+] |
| <b>KIF27</b>   | Kinesin family member 27 [Source:RefSeq_peptide;Acc:NP_060046]                                                                                                                                                                                 |  | 15.369 | -9.99  | 0.00106843 | 303  | 14 | 4 | 44 [+] |
| <b>KIF3A</b>   | Kinesin-like protein KIF3A (Microtubule plus end-directed kinesin motor 3A). [Source:Uniprot/SWISSPROT;Acc:Q9Y496]                                                                                                                             |  | 15.656 | -15.6  | 0.00095287 | 1004 | 18 | 4 | 21 [+] |
| <b>KIF3A</b>   | Kinesin-like protein KIF3A (Microtubule plus end-directed kinesin motor 3A). [Source:Uniprot/SWISSPROT;Acc:Q9Y496]                                                                                                                             |  | 15.663 | -15.6  | 0.00355429 | 1000 | 15 | 1 | 13 [+] |
| <b>KIR2DL1</b> | Killer cell immunoglobulin-like receptor 3DL2 precursor (MHC class I NK cell receptor) (Natural killer-associated transcript 4) (NKAT-4) (p70 natural killer cell receptor clone CL-5) (CD158k antigen). [Source:Uniprot/SWISSPROT;Acc:P43630] |  | 16.866 | -16.47 | 0.0236137  | 509  | 17 | 1 | 43 [+] |
| <b>KL</b>      | Klotho precursor (EC 3.2.1.31) [Contains: Klotho peptide]. [Source:Uniprot/SWISSPROT;Acc:Q9UEF7]                                                                                                                                               |  | 16.181 | -15.57 | 0.0447994  | 1959 | 10 | 3 | 10 [+] |

|               |                                                                                                                                                                                                                        |        |        |            |     |    |   |        |
|---------------|------------------------------------------------------------------------------------------------------------------------------------------------------------------------------------------------------------------------|--------|--------|------------|-----|----|---|--------|
| <b>KLF12</b>  | Krüppel-like factor 12<br>(Transcriptional repressor AP-2rep).<br>[Source:Uniprot/SWISSPROT;Acc:Q9Y4X4]                                                                                                                | 16.255 | -8     | 0.0418339  | 579 | 16 | 1 | 20 [+] |
| <b>KLF6</b>   | Krüppel-like factor 6 (Core promoter element-binding protein) (B-cell-derived protein 1) (Proto-oncogene BCD1) (Transcription factor Zf9) (GC-rich sites-binding factor GBF).<br>[Source:Uniprot/SWISSPROT;Acc:Q99612] | 17.312 | -20.24 | 0.0155096  | 599 | 19 | 1 | 27 [+] |
| <b>KLHDC4</b> | Kelch domain-containing protein 4.<br>[Source:Uniprot/SWISSPROT;Acc:Q8TBB5]                                                                                                                                            | 15.386 | -17.97 | 6.23E-05   | 264 | 14 | 3 | 78 [+] |
| <b>KLK13</b>  | Kallikrein-13 precursor (EC 3.4.21.-) (Kallikrein-like protein 4) (KLK-L4).<br>[Source:Uniprot/SWISSPROT;Acc:Q9UKR3]                                                                                                   | 16.743 | -12.09 | 0.00137975 | 381 | 20 | 3 | 41 [+] |
| <b>KLRD1</b>  | Natural killer cells antigen CD94 (NK cell receptor) (Killer cell lectin-like receptor subfamily D member 1) (KP43).<br>[Source:Uniprot/SWISSPROT;Acc:Q13241]                                                          | 16.178 | -15.48 | 0.0439477  | 184 | 10 | 1 | 36 [+] |
| <b>KLRD1</b>  | Natural killer cells antigen CD94 (NK cell receptor) (Killer cell lectin-like receptor subfamily D member 1) (KP43).<br>[Source:Uniprot/SWISSPROT;Acc:Q13241]                                                          | 16.178 | -15.48 | 0.0439477  | 208 | 12 | 3 | 45 [+] |

|                   |                                                                                                                                                                                                                                    |  |        |        |            |      |    |   |        |
|-------------------|------------------------------------------------------------------------------------------------------------------------------------------------------------------------------------------------------------------------------------|--|--------|--------|------------|------|----|---|--------|
| <b>KRT28</b>      | Keratin 25D<br>[Source:RefSeq_peptide;Acc:NP_853513]                                                                                                                                                                               |  | 15.952 | -14.92 | 0.00013832 | 224  | 11 | 6 | 38 [+] |
| <b>KRTAP10-10</b> | Keratin-associated protein 10-10 (Keratin-associated protein 10.10) (High sulfur keratin-associated protein 10.10) (Keratin-associated protein 18-10) (Keratin-associated protein 18.10).<br>[Source:Uniprot/SWISSPROT;Acc:P60014] |  | 16.065 | -12.06 | 0.0499184  | 280  | 14 | 1 | 40 [+] |
| <b>LACE1</b>      | Lactation elevated protein 1.<br>[Source:Uniprot/SWISSPROT;Acc:Q8WV93]                                                                                                                                                             |  | 16.546 | -15.65 | 0.0135801  | 630  | 16 | 8 | 32 [+] |
| <b>LAMA1</b>      | Laminin subunit alpha-1 precursor (Laminin A chain).<br>[Source:Uniprot/SWISSPROT;Acc:P25391]                                                                                                                                      |  | 15.433 | -12.11 | 0.00062002 | 1000 | 18 | 4 | 28 [+] |
| <b>LAMC3</b>      | Laminin subunit gamma-3 precursor (Laminin 12 gamma 3 subunit).<br>[Source:Uniprot/SWISSPROT;Acc:Q9Y6N6]                                                                                                                           |  | 16.819 | -16.74 | 0.00319609 | 306  | 20 | 4 | 70 [+] |
| <b>LARP6</b>      | La-related protein 6 (La ribonucleoprotein domain family member 6) (Acheron).<br>[Source:Uniprot/SWISSPROT;Acc:Q9BRS8]                                                                                                             |  | 15.356 | -19.37 | 0.00796395 | 514  | 23 | 6 | 51 [+] |
| <b>LAS1L</b>      | LAS1-like protein.<br>[Source:Uniprot/SWISSPROT;Acc:Q9Y4W2]                                                                                                                                                                        |  | 16.97  | -15.98 | 0.00446033 | 193  | 9  | 4 | 30 [+] |
| <b>LAS1L</b>      | LAS1-like protein.<br>[Source:Uniprot/SWISSPROT;Acc:Q9Y4W2]                                                                                                                                                                        |  | 16.97  | -15.98 | 0.0214202  | 192  | 9  | 1 | 23 [+] |



|               |                                                                                                                                                                                                                                                          |  |        |        |            |     |    |   |        |
|---------------|----------------------------------------------------------------------------------------------------------------------------------------------------------------------------------------------------------------------------------------------------------|--|--------|--------|------------|-----|----|---|--------|
| <b>LCAT</b>   | Solute carrier family 12 member 4 (Electroneutral potassium-chloride cotransporter 1) (Erythroid K-Cl cotransporter 1) (hKCC1).<br>[Source:Uniprot/SWISSPROT;Acc:Q9UP95]                                                                                 |  | 15.359 | -12.28 | 0.00788392 | 513 | 25 | 5 | 50 [+] |
| <b>LEFTY2</b> | Left-right determination factor 2 precursor (Protein lefty-2) (Left- right determination factor A) (Protein lefty-A) (Transforming growth factor beta-4) (TGF-beta-4) (Endometrial bleeding-associated factor).<br>[Source:Uniprot/SWISSPROT;Acc:O00292] |  | 16.725 | -13.49 | 0.0269505  | 837 | 11 | 1 | 13 [+] |
| <b>LEPRE1</b> | Prolyl 3-hydroxylase 1 precursor (EC 1.14.11.7) (Leucine- and proline-enriched proteoglycan 1) (Leprecan-1) (Growth suppressor 1).<br>[Source:Uniprot/SWISSPROT;Acc:Q32P28]                                                                              |  | 17.811 | -14.38 | 0.00968127 | 451 | 17 | 1 | 36 [+] |
| <b>LHX3</b>   | LIM/homeobox protein Lhx3.<br>[Source:Uniprot/SWISSPROT;Acc:Q9UBR4]                                                                                                                                                                                      |  | 16.236 | -16.86 | 0.0417008  | 881 | 5  | 1 | 6 [+]  |
| <b>LIAS</b>   | Lipoic acid synthetase, mitochondrial precursor (Lip-syn) (Lipoate synthase).<br>[Source:Uniprot/SWISSPROT;Acc:O43766]                                                                                                                                   |  | 15.922 | -15.59 | 0.00298033 | 538 | 18 | 4 | 50 [+] |

|                  |                                                                                                                                                                                                          |  |        |        |            |      |    |   |        |
|------------------|----------------------------------------------------------------------------------------------------------------------------------------------------------------------------------------------------------|--|--------|--------|------------|------|----|---|--------|
| <b>LILRA5</b>    | leukocyte immunoglobulin-like receptor subfamily A member 5 isoform 2<br>[Source:RefSeq_peptide;Acc:NP_871714]                                                                                           |  | 15.386 | -10.59 | 0.00406873 | 345  | 14 | 3 | 52 [+] |
| <b>LMAN1</b>     | ERGIC-53 protein precursor (ER-Golgi intermediate compartment 53 kDa protein) (Lectin, mannose-binding 1) (Gp58) (Intracellular mannose- specific lectin MR60).<br>[Source:Uniprot/SWISSPROT;Acc:P49257] |  | 16.517 | -11.64 | 0.00389084 | 1217 | 10 | 4 | 10 [+] |
| <b>LMBRD2</b>    | LMBR1 domain containing 2<br>[Source:RefSeq_peptide;Acc:NP_001007528]                                                                                                                                    |  | 16.97  | -19.1  | 0.0164798  | 734  | 21 | 5 | 28 [+] |
| <b>LMO1</b>      | Rhombotin-1 (LIM domain only protein 1) (Cysteine-rich protein TTG-1) (T-cell translocation protein 1).<br>[Source:Uniprot/SWISSPROT;Acc:P25800]                                                         |  | 16.392 | -11.84 | 1.37E-05   | 302  | 16 | 7 | 48 [+] |
| <b>LOC145814</b> | RIKEN cDNA C330024D12 gene<br>[Source:MarkerSymbol;Acc:MGI:1925694]RIKEN cDNA C330024D12 gene<br>[Source:MarkerSymbol;Acc:MGI:1925694] BY ORTHOLOGY TO:ENSMUST00000032770                                |  | 17.762 | -16.85 | 0.0101442  | 248  | 13 | 4 | 44 [+] |

|                  |                                                                                                                                                                                                                                                                                          |  |        |        |            |      |    |   |        |
|------------------|------------------------------------------------------------------------------------------------------------------------------------------------------------------------------------------------------------------------------------------------------------------------------------------|--|--------|--------|------------|------|----|---|--------|
| <b>LOC342979</b> | RIKEN cDNA 4432412L15 gene<br>[Source:MarkerSymbol;Acc:MGI:1921587]RIKEN cDNA 4432412L15 gene<br>[Source:MarkerSymbol;Acc:MGI:1921587] BY ORTHOLOGY<br>TO:ENSMUST00000055077                                                                                                             |  | 16.927 | -25.65 | 0.0126059  | 1000 | 15 | 3 | 16 [+] |
| <b>LOC345630</b> | PREDICTED: Pan troglodytes similar to Expressed sequence AI595406 (LOC471730), mRNA.<br>[Source:RefSeq_dna;Acc:XR_023279]PREDICTED: Pan troglodytes similar to Expressed sequence AI595406 (LOC471730), mRNA.<br>[Source:RefSeq_dna;Acc:XR_023279] BY ORTHOLOGY<br>TO:ENSPTRT00000032368 |  | 16.094 | -14.33 | 0.0473998  | 1000 | 16 | 3 | 23 [+] |
| <b>LOC388339</b> | 40S ribosomal protein S1840S ribosomal protein S18 BY ORTHOLOGY TO:AAEL009747-RA                                                                                                                                                                                                         |  | 16.145 | -21.47 | 0.0463428  | 1000 | 10 | 1 | 8 [+]  |
| <b>LOC390616</b> | Homolog of Homo sapiens "Ankyrin repeat domain 34<br>[Source:UniGene;Acc:Hs.331667]"Homolog of Homo sapiens "Ankyrin repeat domain 34<br>[Source:UniGene;Acc:Hs.331667]" BY ORTHOLOGY<br>TO:SINFRUT00000183444                                                                           |  | 16.23  | -15.93 | 7.88E-05   | 1000 | 11 | 3 | 17 [+] |
| <b>LOC399940</b> | NOT ANNOTATED                                                                                                                                                                                                                                                                            |  | 16.195 | -16.75 | 0.00275965 | 798  | 15 | 1 | 19 [+] |
| <b>LOC647839</b> | NOT ANNOTATED                                                                                                                                                                                                                                                                            |  | 17.875 | -16.91 | 0.00911416 | 143  | 7  | 1 | 26 [+] |
| <b>LOC652904</b> | NOT ANNOTATED                                                                                                                                                                                                                                                                            |  | 17.322 | -15.65 | 0.0038606  | 485  | 21 | 1 | 36 [+] |
| <b>LOC652904</b> | NOT ANNOTATED                                                                                                                                                                                                                                                                            |  | 16.071 | -15.65 | 0.0484069  | 1000 | 9  | 1 | 8 [+]  |

|                  |                                                                                                                                                                                                                             |  |        |        |            |      |    |   |        |
|------------------|-----------------------------------------------------------------------------------------------------------------------------------------------------------------------------------------------------------------------------|--|--------|--------|------------|------|----|---|--------|
| <b>LOC728080</b> | NOT ANNOTATED                                                                                                                                                                                                               |  | 16.628 | -15.49 | 0.00216782 | 1000 | 6  | 2 | 7 [+]  |
| <b>LOC728403</b> | NOT ANNOTATED                                                                                                                                                                                                               |  | 16.171 | -18.61 | 0.0442197  | 1000 | 8  | 1 | 9 [+]  |
| <b>LOC728453</b> | NOT ANNOTATED                                                                                                                                                                                                               |  | 15.553 | -21.41 | 0.0122442  | 1000 | 13 | 2 | 14 [+] |
| <b>LOC728648</b> | NOT ANNOTATED                                                                                                                                                                                                               |  | 16.657 | -15.22 | 0.00253632 | 1000 | 11 | 1 | 12 [+] |
| <b>LOC728660</b> | NOT ANNOTATED                                                                                                                                                                                                               |  | 16.63  | -14.76 | 0.0290295  | 52   | 3  | 1 | 4 [+]  |
| <b>LOC729078</b> | NOT ANNOTATED                                                                                                                                                                                                               |  | 16.63  | -14.76 | 0.0290295  | 52   | 3  | 1 | 5 [+]  |
| <b>LOC729368</b> | NOT ANNOTATED                                                                                                                                                                                                               |  | 16.263 | -9.92  | 0.0415388  | 324  | 13 | 1 | 32 [+] |
| <b>LOC730735</b> | NOT ANNOTATED                                                                                                                                                                                                               |  | 16.628 | -17.1  | 0.00266058 | 1000 | 16 | 2 | 20 [+] |
| <b>LOC731576</b> | High mobility group nucleosomal binding domain 1<br>[Source:RefSeq_peptide;Acc:NP_001013202]high mobility group nucleosomal binding domain 1<br>[Source:RefSeq_peptide;Acc:NP_001013202] BY ORTHOLOGY TO:ENSRNOT00000033557 |  | 16.125 | -18.71 | 0.00034382 | 1000 | 19 | 1 | 23 [+] |
| <b>LPHN2</b>     | Latrophilin-2 precursor (Calcium-independent alpha-latrotoxin receptor 2) (Latrophilin homolog 1) (Lectomedin-1).<br>[Source:Uniprot/SWISSPROT;Acc:O95490]                                                                  |  | 17.792 | -26.78 | 0.00985707 | 1000 | 7  | 1 | 8 [+]  |
| <b>LRAT</b>      | Lecithin retinol acyltransferase (EC 2.3.1.135) (Phosphatidylcholine--retinol O-acyltransferase).<br>[Source:Uniprot/SWISSPROT;Acc:O95237]                                                                                  |  | 15.396 | -14.46 | 0.00853308 | 1899 | 8  | 5 | 8 [+]  |
| <b>LRBA</b>      | Lipopolysaccharide-responsive and beige-like anchor protein (CDC4-like protein) (Beige-like protein).<br>[Source:Uniprot/SWISSPROT;Acc:P50851]                                                                              |  | 15.343 | -13.3  | 0.00068345 | 1061 | 12 | 4 | 15 [+] |

|               |                                                                                                                                              |  |        |        |            |     |    |    |        |
|---------------|----------------------------------------------------------------------------------------------------------------------------------------------|--|--------|--------|------------|-----|----|----|--------|
| <b>LRFN2</b>  | Leucine-rich repeat and fibronectin type-III domain-containing protein 2 precursor.<br>[Source:Uniprot/SWISSPROT;Acc:Q9ULH4]                 |  | 16.038 | -19.82 | 0.00327212 | 357 | 17 | 7  | 63 [+] |
| <b>LRRC8D</b> | Leucine-rich repeat-containing protein 8D.<br>[Source:Uniprot/SWISSPROT;Acc:Q7L1W4]                                                          |  | 17.602 | -14.59 | 1.01E-05   | 355 | 19 | 7  | 55 [+] |
| <b>LRRN1</b>  | Leucine-rich repeat neuronal protein 1 precursor (Neuronal leucine-rich repeat protein 1) (NLRR-1).<br>[Source:Uniprot/SWISSPROT;Acc:Q6UXK5] |  | 17.128 | -15.35 | 0.00052572 | 824 | 19 | 10 | 25 [+] |
| <b>LTV1</b>   | LTV1 homolog<br>[Source:RefSeq_peptide;Acc:NP_116249]                                                                                        |  | 16.63  | -11.4  | 0.0290295  | 285 | 15 | 5  | 57 [+] |
| <b>LYPLA2</b> | Acyl-protein thioesterase 2 (EC 3.1.2.-) (Lysophospholipase II) (LPL- I).<br>[Source:Uniprot/SWISSPROT;Acc:O95372]                           |  | 15.77  | -13.1  | 0.0228077  | 807 | 23 | 4  | 33 [+] |
| <b>LYPLA2</b> | Acyl-protein thioesterase 2 (EC 3.1.2.-) (Lysophospholipase II) (LPL- I).<br>[Source:Uniprot/SWISSPROT;Acc:O95372]                           |  | 16.426 | -13.1  | 0.035665   | 545 | 17 | 1  | 24 [+] |
| <b>LYZL1</b>  | Lysozyme-like protein 1 precursor (EC 3.2.1.17).<br>[Source:Uniprot/SWISSPROT;Acc:Q6UWQ5]                                                    |  | 16.291 | -11.49 | 0.0367965  | 173 | 9  | 2  | 27 [+] |

|                |                                                                                                                               |  |        |        |            |      |    |   |        |
|----------------|-------------------------------------------------------------------------------------------------------------------------------|--|--------|--------|------------|------|----|---|--------|
| <b>LYZL2</b>   | Lysozyme-like protein 2 precursor (EC 3.2.1.17) (Lysozyme-2).<br>[Source:Uniprot/SWISSPROT;Acc:Q7Z4W2]                        |  | 16.744 | -10.85 | 0.0264944  | 169  | 9  | 2 | 27 [+] |
| <b>LYZL4</b>   | Lysozyme-like protein 4 precursor.<br>[Source:Uniprot/SWISSPROT;Acc:Q96KX0]                                                   |  | 15.612 | -18.19 | 0.0108377  | 180  | 10 | 6 | 57 [+] |
| <b>MAB21L1</b> | Mab-21-like protein 1<br>[Source:RefSeq_peptide;Acc:NP_005575]                                                                |  | 15.739 | -18.96 | 4.75E-06   | 877  | 20 | 8 | 30 [+] |
| <b>MAB21L2</b> | Mab-21-like protein 2<br>[Source:RefSeq_peptide;Acc:NP_006430]                                                                |  | 16.274 | -14.25 | 0.00182827 | 551  | 20 | 7 | 39 [+] |
| <b>MADCAM1</b> | Mucosal addressin cell adhesion molecule 1 precursor (MAdCAM-1) (hMAdCAM-1).<br>[Source:Uniprot/SWISSPROT;Acc:Q13477]         |  | 15.66  | -14.67 | 0.00671405 | 377  | 17 | 3 | 42 [+] |
| <b>MAGEA4</b>  | Melanoma-associated antigen 4 (MAGE-4 antigen) (MAGE-X2) (MAGE-41).<br>[Source:Uniprot/SWISSPROT;Acc:P43358]                  |  | 16.615 | -19.39 | 0.0298728  | 552  | 18 | 2 | 28 [+] |
| <b>MAK10</b>   | corneal wound healing-related protein<br>[Source:RefSeq_peptide;Acc:NP_078911]                                                |  | 15.568 | -11.91 | 0.033636   | 338  | 16 | 4 | 51 [+] |
| <b>MAOA</b>    | Amine oxidase [flavin-containing] A (EC 1.4.3.4) (Monoamine oxidase type A) (MAO-A).<br>[Source:Uniprot/SWISSPROT;Acc:P21397] |  | 16.178 | -14.13 | 0.0439529  | 2307 | 5  | 2 | 6 [+]  |

|                |                                                                                                                                                                               |        |        |            |      |    |   |        |
|----------------|-------------------------------------------------------------------------------------------------------------------------------------------------------------------------------|--------|--------|------------|------|----|---|--------|
| <b>MAP3K10</b> | Mitogen-activated protein kinase kinase kinase 10 (EC 2.7.11.25) (Mixed lineage kinase 2) (Protein kinase MST).<br>[Source:Uniprot/SWISSPROT;Acc:Q02779]                      | 18.667 | -21.66 | 0.00421859 | 275  | 15 | 5 | 56 [+] |
| <b>MARK1</b>   | Serine/threonine-protein kinase MARK1 (EC 2.7.11.1) (MAP/microtubule affinity-regulating kinase 1).<br>[Source:Uniprot/SWISSPROT;Acc:Q9P0L2]                                  | 17.196 | -12.41 | 8.37E-06   | 292  | 17 | 8 | 59 [+] |
| <b>MATN3</b>   | Matrilin-3 precursor.<br>[Source:Uniprot/SWISSPROT;Acc:O15232]                                                                                                                | 15.645 | -12.77 | 0.00075741 | 1000 | 21 | 7 | 24 [+] |
| <b>MBIP</b>    | MAP3K12-binding inhibitory protein 1 (MAPK upstream kinase-binding inhibitory protein) (MUK-binding inhibitory protein).<br>[Source:Uniprot/SWISSPROT;Acc:Q9NS73]             | 15.343 | -14.12 | 4.26E-05   | 518  | 24 | 6 | 43 [+] |
| <b>MBOAT4</b>  | Membrane-bound O-acyltransferase domain-containing protein 4 precursor (EC 2.3.-.-) (O-acyltransferase domain-containing protein 4).<br>[Source:Uniprot/SWISSPROT;Acc:Q96T53] | 15.68  | -16.18 | 0.0130648  | 1000 | 15 | 3 | 30 [+] |

|              |                                                                                                                                                                                     |        |        |            |      |    |   |        |
|--------------|-------------------------------------------------------------------------------------------------------------------------------------------------------------------------------------|--------|--------|------------|------|----|---|--------|
| <b>MCM3</b>  | DNA replication licensing factor MCM3 (DNA polymerase alpha holoenzyme-associated protein P1) (RLF subunit beta) (P102 protein) (P1-MCM3).<br>[Source:Uniprot/SWISSPROT;Acc:P25205] | 16.011 | -24.19 | 0.0112714  | 579  | 23 | 4 | 54 [+] |
| <b>MCPH1</b> | Microcephalin.<br>[Source:Uniprot/SWISSPROT;Acc:Q8NEM0]                                                                                                                             | 16.966 | -15.52 | 0.00121994 | 572  | 19 | 3 | 44 [+] |
| <b>MCTP2</b> | Multiple C2-domains with two transmembrane regions 2<br>[Source:RefSeq_peptide;Acc:NP_060819]                                                                                       | 16.343 | -14.67 | 0.0385408  | 707  | 15 | 1 | 19 [+] |
| <b>MDH1B</b> | Malate dehydrogenase 1B, NAD (soluble)<br>[Source:RefSeq_peptide;Acc:NP_001034934]                                                                                                  | 15.838 | -9.5   | 6.62E-06   | 152  | 8  | 6 | 24 [+] |
| <b>MED25</b> | ARC/mediator transcriptional coactivator subunit<br>[Source:RefSeq_peptide;Acc:NP_112235]                                                                                           | 15.957 | -19.9  | 0.00051118 | 1000 | 20 | 4 | 30 [+] |
| <b>MELK</b>  | Maternal embryonic leucine zipper kinase (EC 2.7.11.1) (hMELK) (Protein kinase PK38) (hPK38).<br>[Source:Uniprot/SWISSPROT;Acc:Q14680]                                              | 17.936 | -15.51 | 8.56E-05   | 344  | 19 | 6 | 69 [+] |
| <b>MEPE</b>  | Matrix extracellular phosphoglycoprotein precursor (Osteoblast/osteocyte factor 45) (OF45).<br>[Source:Uniprot/SWISSPROT;Acc:Q9NQ76]                                                | 17.63  | -13.31 | 0.00401369 | 368  | 19 | 3 | 54 [+] |



|                 |                                                                                                                                                                                                      |        |        |            |      |    |   |        |
|-----------------|------------------------------------------------------------------------------------------------------------------------------------------------------------------------------------------------------|--------|--------|------------|------|----|---|--------|
| <b>MERTK</b>    | Proto-oncogene tyrosine-protein kinase MER precursor (EC 2.7.10.1) (C- mer) (Receptor tyrosine kinase MerTK).<br>[Source:Uniprot/SWISSPROT;Acc:Q12866]                                               | 15.932 | -14.8  | 0.0197166  | 501  | 20 | 5 | 40 [+] |
| <b>METAP2</b>   | Methionine aminopeptidase 2 (EC 3.4.11.18) (MetAP 2) (Peptidase M 2) (Initiation factor 2-associated 67 kDa glycoprotein) (p67) (p67eIF2).<br>[Source:Uniprot/SWISSPROT;Acc:P50579]                  | 16.052 | -17.08 | 0.00070167 | 439  | 17 | 7 | 30 [+] |
| <b>METT11D1</b> | Methyltransferase 11 domain containing 1 isoform 2<br>[Source:RefSeq_peptide;Acc:NP_073571]                                                                                                          | 16.166 | -18.12 | 0.00412675 | 1000 | 15 | 3 | 16 [+] |
| <b>METT11D1</b> | Methyltransferase 11 domain containing 1 isoform 2<br>[Source:RefSeq_peptide;Acc:NP_073571]                                                                                                          | 16.166 | -18.12 | 0.00412675 | 1000 | 14 | 1 | 13 [+] |
| <b>METT5D1</b>  | Methyltransferase 5 domain containing 1<br>[Source:RefSeq_peptide;Acc:NP_689849]                                                                                                                     | 15.832 | -14.29 | 0.00360483 | 1000 | 16 | 2 | 19 [+] |
| <b>MGMT</b>     | Methylated-DNA--protein-cysteine methyltransferase (EC 2.1.1.63) (6-O-methylguanine-DNA methyltransferase) (MGMT) (O-6-methylguanine-DNA-alkyltransferase).<br>[Source:Uniprot/SWISSPROT;Acc:P16455] | 15.838 | -14.15 | 0.00635641 | 101  | 6  | 4 | 29 [+] |

|               |                                                                                                                                                                                                                                                                                                 |  |        |        |            |      |    |   |        |
|---------------|-------------------------------------------------------------------------------------------------------------------------------------------------------------------------------------------------------------------------------------------------------------------------------------------------|--|--------|--------|------------|------|----|---|--------|
| <b>MIA2</b>   | Melanoma inhibitory activity protein 2 precursor.<br>[Source:Uniprot/SWISSPROT;Acc:Q96PC5]                                                                                                                                                                                                      |  | 15.94  | -11.96 | 0.00403558 | 388  | 15 | 2 | 48 [+] |
| <b>MINA</b>   | MYC induced nuclear antigen isoform b<br>[Source:RefSeq_peptide;Acc:NP_116167]                                                                                                                                                                                                                  |  | 15.637 | -14.34 | 0.00739791 | 833  | 11 | 6 | 14 [+] |
| <b>MLF1</b>   | Myeloid leukemia factor 1 (Myelodysplasia-myeloid leukemia factor 1).<br>[Source:Uniprot/SWISSPROT;Acc:P58340]                                                                                                                                                                                  |  | 17.422 | -15.88 | 7.09E-06   | 190  | 12 | 7 | 59 [+] |
| <b>MMP7</b>   | Matrilysin precursor (EC 3.4.24.23) (Pump-1 protease) (Uterine metalloproteinase) (Matrix metalloproteinase-7) (MMP-7) (Matrin).<br>[Source:Uniprot/SWISSPROT;Acc:P09237]                                                                                                                       |  | 17.422 | -13.56 | 0.00041742 | 267  | 16 | 4 | 59 [+] |
| <b>MOGAT1</b> | 2-Acylglycerol O-acyltransferase 1 (EC 2.3.1.22) (Monoacylglycerol O-acyltransferase 1) (Acyl CoA:monoacylglycerol acyltransferase 1) (MGAT1) (Diacylglycerol acyltransferase 2-like protein 1) (Diacylglycerol O-acyltransferase candidate 2) (hDC2).<br>[Source:Uniprot/SWISSPROT;Acc:Q96PD6] |  | 17.964 | -18.23 | 0.00484494 | 1000 | 14 | 4 | 19 [+] |

|                 |                                                                                                                                        |  |        |        |            |      |    |   |        |
|-----------------|----------------------------------------------------------------------------------------------------------------------------------------|--|--------|--------|------------|------|----|---|--------|
| <b>MORC3</b>    | MORC family CW-type zinc finger protein 3 (Zinc finger CW-type coiled-coil domain protein 3).<br>[Source:Uniprot/SWISSPROT;Acc:Q14149] |  | 15.427 | -20.27 | 6.42E-05   | 1349 | 16 | 5 | 16 [+] |
| <b>MOSC2</b>    | MOSC domain-containing protein 2, mitochondrial precursor (EC 1.-.-.).<br>[Source:Uniprot/SWISSPROT;Acc:Q969Z3]                        |  | 16.97  | -10.6  | 0.0214202  | 298  | 12 | 1 | 29 [+] |
| <b>MPHOSPH6</b> | M-phase phosphoprotein 6.<br>[Source:Uniprot/SWISSPROT;Acc:Q99547]                                                                     |  | 15.968 | -14.77 | 0.00020959 | 564  | 15 | 7 | 28 [+] |
| <b>MRAS</b>     | Ras-related protein M-Ras precursor (Ras-related protein R-Ras3).<br>[Source:Uniprot/SWISSPROT;Acc:O14807]                             |  | 15.45  | -13.99 | 0.00115695 | 498  | 24 | 6 | 69 [+] |
| <b>MRPL12</b>   | 39S ribosomal protein L12, mitochondrial precursor (L12mt) (MRP-L12) (5c5-2).<br>[Source:Uniprot/SWISSPROT;Acc:P52815]                 |  | 18.214 | -17.32 | 0.00152647 | 276  | 16 | 4 | 65 [+] |
| <b>MRPL12</b>   | 39S ribosomal protein L12, mitochondrial precursor (L12mt) (MRP-L12) (5c5-2).<br>[Source:Uniprot/SWISSPROT;Acc:P52815]                 |  | 17.996 | -17.32 | 0.00812881 | 334  | 19 | 1 | 45 [+] |
| <b>MRPL13</b>   | 39S ribosomal protein L13, mitochondrial (L13mt) (MRP-L13).<br>[Source:Uniprot/SWISSPROT;Acc:Q9BYD1]                                   |  | 17.083 | -13.09 | 7.32E-05   | 260  | 14 | 4 | 42 [+] |

|               |                                                                                                                                                                                                                                                                                   |  |        |        |            |      |    |   |        |
|---------------|-----------------------------------------------------------------------------------------------------------------------------------------------------------------------------------------------------------------------------------------------------------------------------------|--|--------|--------|------------|------|----|---|--------|
| <b>MRPS21</b> | Mitochondrial 28S ribosomal protein S21 (S21mt) (MRP-S21).<br>[Source:Uniprot/SWISSPROT;Acc:P82921]                                                                                                                                                                               |  | 16.848 | -15.55 | 0.0240136  | 752  | 14 | 1 | 16 [+] |
| <b>MRPS21</b> | Mitochondrial 28S ribosomal protein S21 (S21mt) (MRP-S21).<br>[Source:Uniprot/SWISSPROT;Acc:P82921]                                                                                                                                                                               |  | 16.172 | -15.55 | 0.0452053  | 1121 | 7  | 1 | 8 [+]  |
| <b>MRPS23</b> | Mitochondrial ribosomal protein S23 (S23mt) (MRP-S23).<br>[Source:Uniprot/SWISSPROT;Acc:Q9Y3D9]                                                                                                                                                                                   |  | 18.554 | -23.22 | 0.00478961 | 296  | 17 | 6 | 61 [+] |
| <b>MST1</b>   | Hepatocyte growth factor-like protein precursor (Macrophage stimulatory protein) (MSP) (Macrophage-stimulating protein) [Contains: Hepatocyte growth factor-like protein alpha chain; Hepatocyte growth factor-like protein beta chain].<br>[Source:Uniprot/SWISSPROT;Acc:P26927] |  | 16.515 | -14.43 | 0.0328265  | 432  | 21 | 1 | 41 [+] |
| <b>MTAP</b>   | S-methyl-5-thioadenosine phosphorylase (EC 2.4.2.28) (5'-methylthioadenosine phosphorylase) (MTA phosphorylase) (MTAPase).<br>[Source:Uniprot/SWISSPROT;Acc:Q13126]                                                                                                               |  | 17.04  | -15.73 | 0.0200583  | 388  | 19 | 1 | 40 [+] |
| <b>MTMR1</b>  | Myotubularin-related protein 1 (EC 3.1.3.-).<br>[Source:Uniprot/SWISSPROT;Acc:Q13613]                                                                                                                                                                                             |  | 16.178 | -12.55 | 0.00691648 | 600  | 21 | 2 | 39 [+] |

|               |                                                                                                                                                                                       |  |        |        |            |      |    |   |        |
|---------------|---------------------------------------------------------------------------------------------------------------------------------------------------------------------------------------|--|--------|--------|------------|------|----|---|--------|
| <b>MTX2</b>   | Metaxin-2.<br>[Source:Uniprot/SWISSPROT;Acc:O75431]                                                                                                                                   |  | 16.632 | -10.03 | 0.0036032  | 359  | 21 | 8 | 75 [+] |
| <b>MUC13</b>  | Mucin-13 precursor (Down-regulated in colon cancer 1).<br>[Source:Uniprot/SWISSPROT;Acc:Q9H3R2]                                                                                       |  | 16.147 | -15.43 | 0.0101934  | 1301 | 12 | 1 | 14 [+] |
| <b>MYBL1</b>  | Myb-related protein A (A-Myb).<br>[Source:Uniprot/SWISSPROT;Acc:P10243]                                                                                                               |  | 15.598 | -20.11 | 0.00042727 | 1000 | 15 | 4 | 21 [+] |
| <b>MYBPC1</b> | Myosin-binding protein C, slow-type (Slow MyBP-C) (C-protein, skeletal muscle slow isoform).<br>[Source:Uniprot/SWISSPROT;Acc:Q00872]                                                 |  | 16.444 | -8.5   | 0.0350619  | 328  | 15 | 1 | 42 [+] |
| <b>MYBPC3</b> | Myosin-binding protein C, cardiac-type (Cardiac MyBP-C) (C-protein, cardiac muscle isoform).<br>[Source:Uniprot/SWISSPROT;Acc:Q14896]                                                 |  | 17.162 | -18.74 | 0.0178698  | 343  | 18 | 5 | 68 [+] |
| <b>MYCBP2</b> | Probable E3 ubiquitin-protein ligase MYCBP2 (EC 6.3.2.-) (Myc-binding protein 2) (Protein associated with Myc) (Pam/highwire/rpm-1 protein).<br>[Source:Uniprot/SWISSPROT;Acc:O75592] |  | 17.24  | -18.75 | 0.0166139  | 1000 | 7  | 1 | 8 [+]  |

|                   |                                                                                                                                                                                                    |        |        |            |      |    |   |        |
|-------------------|----------------------------------------------------------------------------------------------------------------------------------------------------------------------------------------------------|--------|--------|------------|------|----|---|--------|
| <b>MYL6</b>       | Myosin light polypeptide 6 (Smooth muscle and nonmuscle myosin light chain alkali 6) (Myosin light chain alkali 3) (Myosin light chain 3) (MLC-3) (LC17).<br>[Source:Uniprot/SWISSPROT;Acc:P60660] | 16.744 | -23.3  | 0.0264944  | 206  | 10 | 1 | 31 [+] |
| <b>MYL6</b>       | Myosin light polypeptide 6 (Smooth muscle and nonmuscle myosin light chain alkali 6) (Myosin light chain alkali 3) (Myosin light chain 3) (MLC-3) (LC17).<br>[Source:Uniprot/SWISSPROT;Acc:P60660] | 16.744 | -23.3  | 0.0264944  | 180  | 10 | 2 | 35 [+] |
| <b>MYLE_HUMAN</b> | Protein MYLE (Dexamethasone-induced protein).<br>[Source:Uniprot/SWISSPROT;Acc:O95424]                                                                                                             | 16.112 | -16.75 | 0.00319583 | 789  | 13 | 2 | 13 [+] |
| <b>MYO9B</b>      | Myosin-IXb (Unconventional myosin-9b).<br>[Source:Uniprot/SWISSPROT;Acc:Q13459]                                                                                                                    | 16.173 | -17.65 | 0.0451577  | 974  | 17 | 5 | 24 [+] |
| <b>NANOS3</b>     | Nanos homolog 3.<br>[Source:Uniprot/SWISSPROT;Acc:P60323]                                                                                                                                          | 16.347 | -15.49 | 0.00344608 | 1000 | 16 | 3 | 19 [+] |
| <b>NAT13</b>      | Mak3 homolog<br>[Source:RefSeq_peptide;Acc:NP_079422]                                                                                                                                              | 16.422 | -21.28 | 0.0358014  | 1000 | 11 | 1 | 15 [+] |
| <b>NAT5</b>       | <i>N</i> -acetyltransferase 5 (EC 2.3.1.-).<br>[Source:Uniprot/SWISSPROT;Acc:P61599]                                                                                                               | 16.51  | -16.94 | 0.00301124 | 719  | 21 | 7 | 39 [+] |

|                |                                                                                                                                                                                                                                    |  |        |        |            |     |    |   |        |
|----------------|------------------------------------------------------------------------------------------------------------------------------------------------------------------------------------------------------------------------------------|--|--------|--------|------------|-----|----|---|--------|
| <b>NAT5</b>    | <i>N</i> -acetyltransferase 5 (EC 2.3.1.-).<br>[Source:Uniprot/SWISSPROT;Acc:P61599]                                                                                                                                               |  | 16.383 | -16.94 | 0.0364414  | 774 | 14 | 1 | 17 [+] |
| <b>NDUFAB1</b> | Acyl carrier protein, mitochondrial precursor (ACP) (NADH-ubiquinone oxidoreductase 9.6 kDa subunit) (CI-SDAP).<br>[Source:Uniprot/SWISSPROT;Acc:O14561]                                                                           |  | 16.517 | -24.97 | 0.0037846  | 166 | 9  | 3 | 28 [+] |
| <b>NDUFB8</b>  | NADH dehydrogenase [ubiquinone] 1 beta subcomplex subunit 8, mitochondrial precursor (EC 1.6.5.3) (EC 1.6.99.3) (NADH-ubiquinone oxidoreductase ASHI subunit) (Complex I-ASHI) (CI-ASHI).<br>[Source:Uniprot/SWISSPROT;Acc:O95169] |  | 16.404 | -13.86 | 0.00137875 | 152 | 9  | 1 | 31 [+] |
| <b>NDUFS3</b>  | Protein-tyrosine phosphatase mitochondrial 1, mitochondrial precursor (EC 3.1.3.48) (EC 3.1.3.16) (PTEN-like phosphatase) (Phosphoinositide lipid phosphatase).<br>[Source:Uniprot/SWISSPROT;Acc:Q8WUK0]                           |  | 16.178 | -14.65 | 0.0449427  | 81  | 4  | 5 | 19 [+] |
| <b>NEDD8</b>   | NEDD8 precursor (Ubiquitin-like protein Nedd8) (Neddylin).<br>[Source:Uniprot/SWISSPROT;Acc:Q15843]                                                                                                                                |  | 15.386 | -16.92 | 0.00859695 | 261 | 14 | 6 | 52 [+] |

|               |                                                                                                                                                                                                             |        |        |            |     |    |   |        |
|---------------|-------------------------------------------------------------------------------------------------------------------------------------------------------------------------------------------------------------|--------|--------|------------|-----|----|---|--------|
| <b>NEFH</b>   | Neurofilament heavy polypeptide (NF-H) (Neurofilament triplet H protein) (200 kDa neurofilament protein).<br>[Source:Uniprot/SWISSPROT;Acc:P12036]                                                          | 16.099 | -14.16 | 0.00124401 | 583 | 19 | 7 | 40 [+] |
| <b>NEU3</b>   | Sialidase-3 (EC 3.2.1.18) (Membrane sialidase) (Ganglioside sialidase) (N-acetyl-alpha-neuraminidase 3).<br>[Source:Uniprot/SWISSPROT;Acc:Q9UQ49]                                                           | 15.653 | -12.04 | 0.00034828 | 592 | 22 | 3 | 36 [+] |
| <b>NEXN</b>   | Nexilin (Sarcoma antigen NY-SAR-22).<br>[Source:Uniprot/SPTREMBL;Acc:Q0ZGT2]                                                                                                                                | 16.505 | -23.28 | 0.0325947  | 978 | 9  | 1 | 10 [+] |
| <b>NFATC3</b> | Nuclear factor of activated T-cells, cytoplasmic 3 (NF-ATc3) (NFATc3) (T cell transcription factor NFAT4) (NF-AT4) (NFAT $\alpha$ ).<br>[Source:Uniprot/SWISSPROT;Acc:Q12968]                               | 16.105 | -13.38 | 0.00184566 | 426 | 22 | 8 | 81 [+] |
| <b>NFYC</b>   | Nuclear transcription factor Y subunit gamma (Nuclear transcription factor Y subunit C) (NF-YC) (CAAT-box DNA-binding protein subunit C) (Transactivator HSM-1/2).<br>[Source:Uniprot/SWISSPROT;Acc:Q13952] | 16.63  | -14.28 | 0.0290295  | 278 | 11 | 1 | 24 [+] |



|                    |                                                                                                                                                                                                             |  |        |        |            |     |    |   |        |
|--------------------|-------------------------------------------------------------------------------------------------------------------------------------------------------------------------------------------------------------|--|--------|--------|------------|-----|----|---|--------|
| <b>NFYC</b>        | Nuclear transcription factor Y subunit gamma (Nuclear transcription factor Y subunit C) (NF-YC) (CAAT-box DNA-binding protein subunit C) (Transactivator HSM-1/2).<br>[Source:Uniprot/SWISSPROT;Acc:Q13952] |  | 16.63  | -14.28 | 0.0290295  | 274 | 11 | 1 | 24 [+] |
| <b>NGEF</b>        | Ephexin-1 (Eph-interacting exchange protein) (Neuronal guanine nucleotide exchange factor).<br>[Source:Uniprot/SWISSPROT;Acc:Q8N5V2]                                                                        |  | 16.163 | -19.76 | 0.00030643 | 778 | 25 | 5 | 35 [+] |
| <b>NIPBL</b>       | Nipped-B-like protein (Delangin) (SCC2 homolog).<br>[Source:Uniprot/SWISSPROT;Acc:Q6KC79]                                                                                                                   |  | 16.404 | -9.92  | 0.0357474  | 296 | 11 | 1 | 30 [+] |
| <b>NLRP8</b>       | NACHT, LRR and PYD-containing protein 8 (Nucleotide-binding oligomerization domain protein 16) (PYRIN and NACHT-containing protein 4).<br>[Source:Uniprot/SWISSPROT;Acc:Q86W28]                             |  | 17.88  | -17.97 | 0.00906655 | 716 | 22 | 2 | 41 [+] |
| <b>NM_001031.4</b> | Ribosomal protein S28 (RPS28), mRNA<br>[Source:RefSeq_dna;Acc:NM_001031]                                                                                                                                    |  | 17.309 | -20.94 | 0.0155574  | 140 | 7  | 1 | 19 [+] |
| <b>NM_182631</b>   | CDNA FLJ43952 fis, clone TESTI4015471.<br>[Source:Uniprot/SPTREMBL;Acc:Q6ZU74]                                                                                                                              |  | 16.362 | -15.47 | 0.0378471  | 601 | 18 | 1 | 22 [+] |

|                    |                                                                                                                                                                                                                              |  |        |        |            |      |    |   |        |
|--------------------|------------------------------------------------------------------------------------------------------------------------------------------------------------------------------------------------------------------------------|--|--------|--------|------------|------|----|---|--------|
| <b>NM_207362.2</b> | similar to 2010300C02Rik protein (MGC42367), mRNA [Source:RefSeq_dna;Acc:NM_207362]                                                                                                                                          |  | 16.543 | -21.06 | 0.0319568  | 1000 | 13 | 2 | 18 [+] |
| <b>NMB</b>         | Neuromedin-B precursor [Contains: Neuromedin-B-32; Neuromedin-B]. [Source:Uniprot/SWISSPROT;Acc:P08949]                                                                                                                      |  | 16.857 | -14.6  | 0.00068355 | 241  | 14 | 7 | 65 [+] |
| <b>NMT2</b>        | Glycylpeptide N-tetradecanoyltransferase 2 (EC 2.3.1.97) (Peptide N-myristoyltransferase 2) (Myristoyl-CoA:protein N-myristoyltransferase 2) (NMT 2) (Type II N-myristoyltransferase). [Source:Uniprot/SWISSPROT;Acc:O60551] |  | 17.12  | -24.52 | 0.0186034  | 1291 | 7  | 1 | 5 [+]  |
| <b>NOS1AP</b>      | Carboxyl-terminal PDZ ligand of neuronal nitric oxide synthase protein (C-terminal PDZ ligand of neuronal nitric oxide synthase protein) (Nitric oxide synthase 1 adaptor protein). [Source:Uniprot/SWISSPROT;Acc:O75052]    |  | 16.073 | -19.52 | 3.60E-05   | 987  | 22 | 4 | 30 [+] |
| <b>NOVA2</b>       | RNA-binding protein Nova-2 (Neuro-oncological ventral antigen 2) (Astrocytic NOVA1-like RNA-binding protein). [Source:Uniprot/SWISSPROT;Acc:Q9UNW9]                                                                          |  | 16.404 | -18.88 | 0.00017287 | 330  | 17 | 7 | 85 [+] |

|                       |                                                                                                  |  |        |        |            |      |    |   |        |
|-----------------------|--------------------------------------------------------------------------------------------------|--|--------|--------|------------|------|----|---|--------|
| <b>NP_001001710.1</b> | Similar to 4931415M17 protein (LOC401565), mRNA<br>[Source:RefSeq_dna;Acc:NM_001001710]          |  | 15.612 | -17.24 | 0.0210775  | 116  | 7  | 8 | 38 [+] |
| <b>NP_001004331.1</b> | Similar to CG32662-PA (MGC88374), mRNA<br>[Source:RefSeq_dna;Acc:NM_001004331]                   |  | 16.235 | -19.26 | 0.00678519 | 372  | 21 | 3 | 46 [+] |
| <b>NP_001005514.1</b> | Olfactory receptor, family 5, subfamily H, member 14<br>[Source:RefSeq_peptide;Acc:NP_001005514] |  | 16.13  | -15.05 | 0.0458863  | 1000 | 10 | 1 | 13 [+] |
| <b>NP_001007547.1</b> | CDNA FLJ46838 fis, clone UTERU2035926.<br>[Source:Uniprot/SPTREMBL;Acc:Q6ZQN3]                   |  | 16.273 | -21.87 | 0.041139   | 1693 | 3  | 1 | 3 [+]  |
| <b>NP_001008784.1</b> | CD200 cell surface glycoprotein receptor isoform 2<br>[Source:RefSeq_peptide;Acc:NP_001008784]   |  | 15.548 | -15.81 | 0.0398218  | 1000 | 18 | 2 | 26 [+] |
| <b>NP_001013009.2</b> | Similar to TSG118.1 (LOC400506), mRNA<br>[Source:RefSeq_dna;Acc:NM_001012991]                    |  | 15.446 | -16.63 | 0.00321627 | 1000 | 18 | 5 | 29 [+] |
| <b>NP_001013662.1</b> | Similar to Complement C3 precursor (LOC388503), mRNA<br>[Source:RefSeq_dna;Acc:NM_001013640]     |  | 15.812 | -19.5  | 0.00856037 | 1389 | 9  | 2 | 11 [+] |
| <b>NP_001017361.1</b> | ES cell associated transcript 1 (ECAT1), mRNA<br>[Source:RefSeq_dna;Acc:NM_001017361]            |  | 15.612 | -17.78 | 0.00567638 | 311  | 15 | 4 | 55 [+] |

|                       |                                                                                                                                                                                                                           |  |        |        |            |      |    |   |        |
|-----------------------|---------------------------------------------------------------------------------------------------------------------------------------------------------------------------------------------------------------------------|--|--------|--------|------------|------|----|---|--------|
| <b>NP_001025037.1</b> | Similar to T-complex protein 1<br>[Source:RefSeq_peptide;Acc:NP_001025037]                                                                                                                                                |  | 17.535 | -15.68 | 0.0124858  | 100  | 4  | 1 | 8 [+]  |
| <b>NP_001026904.1</b> | CDNA FLJ39703 fis, clone SMINT2012195.<br>[Source:Uniprot/SPTREMBL;Acc:Q8N8B8]                                                                                                                                            |  | 16.23  | -18.27 | 0.0019143  | 422  | 17 | 4 | 50 [+] |
| <b>NP_001074015.1</b> | Similar to RIKEN cDNA 1810021J13 (RGD1311364), mRNA<br>[Source:RefSeq_dna;Acc:NM_001008325]similar to RIKEN cDNA 1810021J13 (RGD1311364), mRNA<br>[Source:RefSeq_dna;Acc:NM_001008325] BY ORTHOLOGY TO:ENSRNOT00000012060 |  | 16.339 | -18.16 | 0.0379358  | 539  | 21 | 4 | 34 [+] |
| <b>NP_056993.2</b>    | Neuroblastoma-amplified protein<br>[Source:RefSeq_peptide;Acc:NP_056993]                                                                                                                                                  |  | 15.386 | -16.82 | 0.005865   | 140  | 8  | 4 | 26 [+] |
| <b>NP_060401.2</b>    | OTTHUMP00000028646.<br>[Source:Uniprot/SPTREMBL;Acc:Q5R3I4]                                                                                                                                                               |  | 15.554 | -17.68 | 0.00708291 | 1122 | 18 | 2 | 22 [+] |
| <b>NP_065930.2</b>    | CDNA FLJ31980 fis, clone NT2RP7008487, weakly similar to TRICHOHYALIN.<br>[Source:Uniprot/SPTREMBL;Acc:Q96MS1]                                                                                                            |  | 16.085 | -17.67 | 0.00130011 | 336  | 18 | 3 | 48 [+] |
| <b>NP_443196.1</b>    | Mast cell immunoreceptor signal transducer<br>[Source:RefSeq_peptide;Acc:NP_443196]                                                                                                                                       |  | 16.047 | -17.81 | 0.00530773 | 765  | 22 | 5 | 31 [+] |

|                    |                                                                                                                                                                                         |  |        |        |            |      |    |   |        |
|--------------------|-----------------------------------------------------------------------------------------------------------------------------------------------------------------------------------------|--|--------|--------|------------|------|----|---|--------|
| <b>NP_542387.1</b> | MGC13017 protein.<br>[Source:Uniprot/SPTREMBL;Acc:Q8WVE3]                                                                                                                               |  | 15.656 | -12.49 | 0.00550403 | 801  | 22 | 3 | 35 [+] |
| <b>NP_742001.1</b> | Type II transmembrane protein DCAL1<br>[Source:RefSeq_peptide;Acc:NP_742001]                                                                                                            |  | 15.612 | -14.67 | 0.00450714 | 128  | 7  | 1 | 19 [+] |
| <b>NP_775813.1</b> | Lamina ancestor CG10645-PB, isoform B<br>[Source:RefSeq_peptide;Acc:NP_523933]lamina ancestor CG10645-PB, isoform B<br>[Source:RefSeq_peptide;Acc:NP_523933] BY ORTHOLOGY TO:CG10645-RC |  | 15.376 | -15.22 | 0.0080308  | 770  | 25 | 3 | 42 [+] |
| <b>NP_981947.1</b> | Similar to CG10671-like<br>[Source:RefSeq_peptide;Acc:NP_981947]                                                                                                                        |  | 15.993 | -16.89 | 0.0102724  | 1000 | 16 | 3 | 23 [+] |
| <b>NP_981952.1</b> | Similar to CG32656-PA (LOC340602), mRNA<br>[Source:RefSeq_dna;Acc:NM_203407]                                                                                                            |  | 16.361 | -16.55 | 0.0378815  | 307  | 18 | 3 | 65 [+] |
| <b>NP_997199.1</b> | SRSR846 (UNQ846), mRNA<br>[Source:RefSeq_dna;Acc:NM_207316]                                                                                                                             |  | 16.137 | -13.22 | 0.00372621 | 936  | 5  | 1 | 7 [+]  |
| <b>NP_997319.1</b> | CDNA FLJ42957 fis, clone BRSTN2010500 (FLJ42957 protein).<br>[Source:Uniprot/SPTREMBL;Acc:Q6ZV60]                                                                                       |  | 18.009 | -16.3  | 0.00802771 | 463  | 15 | 1 | 33 [+] |

|                    |                                                                                                                                                                                                        |  |        |        |            |      |    |    |        |
|--------------------|--------------------------------------------------------------------------------------------------------------------------------------------------------------------------------------------------------|--|--------|--------|------------|------|----|----|--------|
| <b>NPC1</b>        | Niemann-Pick C1 protein precursor.<br>[Source:Uniprot/SWISSPROT;Acc:O15118]                                                                                                                            |  | 16.825 | -19.27 | 0.0245432  | 701  | 22 | 8  | 44 [+] |
| <b>NPPA</b>        | Atrial natriuretic factor precursor (ANF) (Atrial natriuretic peptide) (ANP) (Prepronatriodilatin) (CDD-ANF) [Contains: Cardiodilatin-related peptide (CDP)].<br>[Source:Uniprot/SWISSPROT;Acc:P01160] |  | 15.725 | -16.14 | 0.0117095  | 300  | 18 | 6  | 68 [+] |
| <b>NPTN</b>        | Neuroplastin precursor (Stromal cell-derived receptor 1) (SDR-1).<br>[Source:Uniprot/SWISSPROT;Acc:Q9Y639]                                                                                             |  | 15.452 | -15.67 | 2.14E-05   | 1039 | 26 | 6  | 35 [+] |
| <b>NR_002593.1</b> | Solute carrier family 7 (cationic amino acid transporter, y <sup>+</sup> system), member 5 pseudogene 1 (SLC7A5P1) on chromosome 16<br>[Source:RefSeq_dna;Acc:NR_002593]                               |  | 15.618 | -19.74 | 0.00269753 | 558  | 12 | 1  | 18 [+] |
| <b>NR6A1</b>       | Orphan nuclear receptor NR6A1 (Germ cell nuclear factor) (GCNF) (Retinoid receptor-related testis-specific receptor) (RTR).<br>[Source:Uniprot/SWISSPROT;Acc:Q15406]                                   |  | 20.024 | -24.56 | 1.99E-13   | 289  | 13 | 12 | 66 [+] |
| <b>NRF1</b>        | Nuclear respiratory factor 1 (NRF-1) (Alpha palindromic-binding protein) (Alpha-pal).<br>[Source:Uniprot/SWISSPROT;Acc:Q16656]                                                                         |  | 16.15  | -19.05 | 0.00263339 | 833  | 21 | 4  | 32 [+] |

|                    |                                                                                                                                                                                        |  |        |        |            |      |    |    |        |
|--------------------|----------------------------------------------------------------------------------------------------------------------------------------------------------------------------------------|--|--------|--------|------------|------|----|----|--------|
| <b>NRP2</b>        | Neuropilin-2 precursor (Vascular endothelial cell growth factor 165 receptor 2).<br>[Source:Uniprot/SWISSPROT;Acc:O60462]                                                              |  | 16.057 | -19.6  | 0.0490542  | 783  | 10 | 1  | 13 [+] |
| <b>NSF</b>         | Vesicle-fusing ATPase (EC 3.6.4.6) (Vesicular-fusion protein NSF) (N-ethylmaleimide sensitive fusion protein) (NEM-sensitive fusion protein).<br>[Source:Uniprot/SWISSPROT;Acc:P46459] |  | 16.705 | -22.43 | 0.0274817  | 1637 | 13 | 5  | 15 [+] |
| <b>NSG1_HUMAN</b>  | Neuron-specific protein family member 1 (Brain neuron cytoplasmic protein 1).<br>[Source:Uniprot/SWISSPROT;Acc:P42857]                                                                 |  | 15.483 | -9.27  | 0.00794021 | 1623 | 15 | 6  | 14 [+] |
| <b>NSMAF</b>       | Protein FAN (Factor associated with N-SMase activation) (Factor associated with neutral sphingomyelinase activation).<br>[Source:Uniprot/SWISSPROT;Acc:Q92636]                         |  | 16.17  | -14.57 | 0.00024205 | 595  | 23 | 11 | 47 [+] |
| <b>NT5C1B</b>      | Retinol dehydrogenase 14 (EC 1.1.1.-) (Alcohol dehydrogenase PAN2).<br>[Source:Uniprot/SWISSPROT;Acc:Q9HBH5]                                                                           |  | 15.678 | -18.62 | 0.00173319 | 925  | 19 | 6  | 25 [+] |
| <b>NUPR1_HUMAN</b> | Nuclear protein 1 (Protein p8) (Candidate of metastasis 1).<br>[Source:Uniprot/SWISSPROT;Acc:O60356]                                                                                   |  | 15.942 | -20.57 | 0.00813007 | 342  | 17 | 6  | 52 [+] |

|               |                                                                                                                               |  |        |        |            |      |    |   |        |
|---------------|-------------------------------------------------------------------------------------------------------------------------------|--|--------|--------|------------|------|----|---|--------|
| <b>ODF3L1</b> | Outer dense fiber of sperm tails 3-like 1<br>[Source:RefSeq_peptide;Acc:NP_787077]                                            |  | 16.517 | -17.42 | 0.0327503  | 146  | 9  | 8 | 25 [+] |
| <b>OGFRL1</b> | Opioid growth factor receptor-like 1<br>[Source:RefSeq_peptide;Acc:NP_078852]                                                 |  | 15.838 | -8.93  | 0.00155321 | 219  | 9  | 5 | 25 [+] |
| <b>OR13G1</b> | Olfactory receptor 13G1.<br>[Source:Uniprot/SWISSPROT;Acc:Q8NGZ3]                                                             |  | 15.632 | -16.7  | 0.00181184 | 1000 | 17 | 2 | 27 [+] |
| <b>OR1L8</b>  | Olfactory receptor 1L8 (Olfactory receptor OR9-24).<br>[Source:Uniprot/SWISSPROT;Acc:Q8NGR8]                                  |  | 16.164 | -13.63 | 0.0455057  | 1000 | 11 | 3 | 14 [+] |
| <b>OR2T2</b>  | Olfactory receptor 2T2 (Olfactory receptor OR1-43).<br>[Source:Uniprot/SWISSPROT;Acc:Q6IF00]                                  |  | 16.13  | -12.98 | 0.0469724  | 1000 | 22 | 1 | 13 [+] |
| <b>OR2T35</b> | Olfactory receptor 2T35 (Olfactory receptor OR1-66).<br>[Source:Uniprot/SWISSPROT;Acc:Q8NGX2]                                 |  | 16.13  | -12.98 | 0.0469724  | 1000 | 24 | 1 | 14 [+] |
| <b>OR51D1</b> | Olfactory receptor 51D1 (Olfactory receptor OR11-14).<br>[Source:Uniprot/SWISSPROT;Acc:Q8NGF3]                                |  | 15.334 | -17.1  | 0.00407969 | 1000 | 19 | 2 | 20 [+] |
| <b>OR51I1</b> | Olfactory receptor 51I1 (Olfactory receptor OR11-39) (Odorant receptor HOR5'beta11).<br>[Source:Uniprot/SWISSPROT;Acc:Q9H343] |  | 16.13  | -18.14 | 0.0458863  | 1000 | 9  | 1 | 10 [+] |



|                |                                                                                                                                                                                           |  |        |        |            |      |    |   |        |
|----------------|-------------------------------------------------------------------------------------------------------------------------------------------------------------------------------------------|--|--------|--------|------------|------|----|---|--------|
| <b>OR52L1</b>  | Olfactory receptor 52L1.<br>[Source:Uniprot/SWISSPROT;Acc:Q8NGH7]                                                                                                                         |  | 16.529 | -18.33 | 0.0324051  | 1000 | 13 | 2 | 17 [+] |
| <b>OR5M9</b>   | Olfactory receptor 5M9 (Olfactory receptor OR11-190).<br>[Source:Uniprot/SWISSPROT;Acc:Q8NGP3]                                                                                            |  | 16.23  | -21.27 | 0.0019056  | 1000 | 13 | 2 | 14 [+] |
| <b>OR5P2</b>   | Olfactory receptor 5P2 (Olfactory receptor-like protein JCG3).<br>[Source:Uniprot/SWISSPROT;Acc:Q8WZ92]                                                                                   |  | 15.931 | -24.74 | 0.00363839 | 1000 | 11 | 1 | 14 [+] |
| <b>OSBPL1A</b> | Oxysterol-binding protein-related protein 1 (OSBP-related protein 1) (ORP-1).<br>[Source:Uniprot/SWISSPROT;Acc:Q9BXW6]                                                                    |  | 16.172 | -17.11 | 0.00074431 | 1130 | 11 | 4 | 13 [+] |
| <b>OTOP1</b>   | Otopetrin 1<br>[Source:RefSeq_peptide;Acc:NP_819056]                                                                                                                                      |  | 15.732 | -14.68 | 0.00174642 | 1000 | 17 | 3 | 22 [+] |
| <b>OTUD1</b>   | OTU domain-containing protein 1.<br>[Source:Uniprot/SWISSPROT;Acc:Q5VV17]                                                                                                                 |  | 15.942 | -12.36 | 0.0196165  | 1271 | 16 | 6 | 19 [+] |
| <b>P4HA2</b>   | Prolyl 4-hydroxylase subunit alpha-2 precursor (EC 1.14.11.2) (4-PH alpha-2) (Procollagen-proline,2-oxoglutarate-4-dioxygenase alpha-2 subunit).<br>[Source:Uniprot/SWISSPROT;Acc:O15460] |  | 16.339 | -12.39 | 0.00133193 | 397  | 19 | 1 | 43 [+] |

|              |                                                                                                                                                                                                                                                                                                    |  |        |        |            |     |    |   |        |
|--------------|----------------------------------------------------------------------------------------------------------------------------------------------------------------------------------------------------------------------------------------------------------------------------------------------------|--|--------|--------|------------|-----|----|---|--------|
| <b>P4HA2</b> | Prolyl 4-hydroxylase subunit alpha-2 precursor (EC 1.14.11.2) (4-PH alpha-2) (Procollagen-proline,2-oxoglutarate-4-dioxygenase alpha-2 subunit).<br>[Source:Uniprot/SWISSPROT;Acc:O15460]                                                                                                          |  | 16.325 | -12.39 | 0.0013643  | 400 | 19 | 1 | 43 [+] |
| <b>PADI6</b> | Protein-arginine deiminase type-6 (EC 3.5.3.15) (Protein-arginine deiminase type VI) (Peptidylarginine deiminase VI).<br>[Source:Uniprot/SWISSPROT;Acc:Q6TGC4]                                                                                                                                     |  | 15.386 | -15.57 | 0.00789276 | 261 | 14 | 3 | 50 [+] |
| <b>PALB2</b> | Partner and localizer of BRCA2.<br>[Source:Uniprot/SWISSPROT;Acc:Q86YC2]                                                                                                                                                                                                                           |  | 16.63  | -17.08 | 0.00020074 | 297 | 18 | 7 | 53 [+] |
| <b>PAM</b>   | Peptidyl-glycine alpha-amidating monooxygenase precursor (PAM) [Includes: Peptidylglycine alpha-hydroxylating monooxygenase (EC 1.14.17.3) (PHM); Peptidyl-alpha-hydroxyglycine alpha-amidating lyase (EC 4.3.2.5) (Peptidylamidoglycolate lyase) (PAL)].<br>[Source:Uniprot/SWISSPROT;Acc:P19021] |  | 15.404 | -12.4  | 0.00159986 | 647 | 21 | 8 | 46 [+] |
| <b>PANK2</b> | Pantothenate kinase 2, mitochondrial precursor (EC 2.7.1.33) (Pantothenic acid kinase 2) (hPANK2).<br>[Source:Uniprot/SWISSPROT;Acc:Q9BZ23]                                                                                                                                                        |  | 16.164 | -12.93 | 0.00452012 | 561 | 26 | 6 | 50 [+] |

|               |                                                                                                                                                                                                                                                                                                          |  |        |        |            |      |    |   |        |
|---------------|----------------------------------------------------------------------------------------------------------------------------------------------------------------------------------------------------------------------------------------------------------------------------------------------------------|--|--------|--------|------------|------|----|---|--------|
| <b>PANK2</b>  | Pantothenate kinase 2, mitochondrial precursor (EC 2.7.1.33) (Pantothenic acid kinase 2) (hPANK2).<br>[Source:Uniprot/SWISSPROT;Acc:Q9BZ23]                                                                                                                                                              |  | 16.168 | -12.93 | 0.0453748  | 560  | 20 | 1 | 31 [+] |
| <b>PAPSS1</b> | Bifunctional 3'-phosphoadenosine 5'-phosphosulfate synthetase 1 (PAPS synthetase 1) (PAPSS 1) (Sulfurylase kinase 1) (SK1) (SK 1) [Includes: Sulfate adenylyltransferase (EC 2.7.7.4) (Sulfate adenylate transferase) (SAT) (ATP-sulfurylase); Adenylyl-sulfate<br>[Source:Uniprot/SWISSPROT;Acc:O43252] |  | 15.431 | -15.88 | 0.00861987 | 582  | 22 | 6 | 41 [+] |
| <b>PAQR3</b>  | Progestin and adipoQ receptor family member 3 (Progestin and adipoQ receptor family member III).<br>[Source:Uniprot/SWISSPROT;Acc:Q6TCH7]                                                                                                                                                                |  | 15.778 | -13.27 | 0.00013661 | 585  | 17 | 2 | 30 [+] |
| <b>PARK2</b>  | Parkin (EC 6.3.2.-) (Ubiquitin E3 ligase PRKN) (Parkinson juvenile disease protein 2) (Parkinson disease protein 2).<br>[Source:Uniprot/SWISSPROT;Acc:O60260]                                                                                                                                            |  | 16.286 | -16.94 | 0.0398273  | 1000 | 9  | 1 | 9 [+]  |

|                |                                                                                                                                                                                    |  |        |        |            |      |    |   |        |
|----------------|------------------------------------------------------------------------------------------------------------------------------------------------------------------------------------|--|--------|--------|------------|------|----|---|--------|
| <b>PARN</b>    | Poly(A)-specific ribonuclease PARN (EC 3.1.13.4) (Polyadenylate-specific ribonuclease) (Deadenylating nuclease) (Deadenylation nuclease).<br>[Source:Uniprot/SWISSPROT;Acc:O95453] |  | 15.838 | -11.31 | 2.84E-05   | 1000 | 20 | 3 | 26 [+] |
| <b>PAWR</b>    | PRKC apoptosis WT1 regulator protein (Prostate apoptosis response 4 protein) (Par-4).<br>[Source:Uniprot/SWISSPROT;Acc:Q96IZ0]                                                     |  | 16.151 | -15.47 | 2.80E-05   | 640  | 19 | 7 | 28 [+] |
| <b>PCDHA1</b>  | Protocadherin alpha 1 precursor (PCDH-alpha1).<br>[Source:Uniprot/SWISSPROT;Acc:Q9Y5I3]                                                                                            |  | 18.214 | -10.28 | 0.00660821 | 147  | 7  | 1 | 17 [+] |
| <b>PCDHB18</b> | Protocadherin beta 18 pseudogene (PCDHB18) on chromosome 5<br>[Source:RefSeq_dna;Acc:NR_001281]                                                                                    |  | 16.462 | -15.72 | 0.0345008  | 611  | 13 | 1 | 22 [+] |
| <b>PCDHB3</b>  | Protocadherin beta 3 precursor (PCDH-beta3).<br>[Source:Uniprot/SWISSPROT;Acc:Q9Y5E6]                                                                                              |  | 16.148 | -13.86 | 0.046203   | 782  | 14 | 3 | 16 [+] |
| <b>PCDHB6</b>  | Protocadherin beta 6 precursor (PCDH-beta6).<br>[Source:Uniprot/SWISSPROT;Acc:Q9Y5E3]                                                                                              |  | 15.768 | -10.45 | 0.00802098 | 645  | 17 | 4 | 31 [+] |

|               |                                                                                                                                                                                                                                                                           |  |        |        |            |      |    |   |        |
|---------------|---------------------------------------------------------------------------------------------------------------------------------------------------------------------------------------------------------------------------------------------------------------------------|--|--------|--------|------------|------|----|---|--------|
| <b>PCGF2</b>  | Polycomb group RING finger protein 2 (DNA-binding protein Mel-18) (RING finger protein 110) (Zinc finger protein 144).<br>[Source:Uniprot/SWISSPROT;Acc:P35227]                                                                                                           |  | 17.102 | -19.77 | 0.00100426 | 1000 | 17 | 4 | 23 [+] |
| <b>PCK2</b>   | Phosphoenolpyruvate carboxykinase [GTP], mitochondrial precursor (EC 4.1.1.32) (Phosphoenolpyruvate carboxylase) (PEPCK-M).<br>[Source:Uniprot/SWISSPROT;Acc:Q16822]                                                                                                      |  | 15.386 | -8.29  | 0.00789276 | 166  | 10 | 5 | 28 [+] |
| <b>PCMT1</b>  | Protein-L-isoaspartate(D-aspartate) O-methyltransferase (EC 2.1.1.77) (Protein-beta-aspartate methyltransferase) (PIMT) (Protein L-isoaspartyl/D-aspartyl methyltransferase) (L-isoaspartyl protein carboxyl methyltransferase).<br>[Source:Uniprot/SWISSPROT;Acc:P22061] |  | 16.39  | -15.18 | 0.0362228  | 436  | 19 | 1 | 44 [+] |
| <b>PCYOX1</b> | Preylcysteine oxidase precursor (EC 1.8.3.5) (PCL1).<br>[Source:Uniprot/SWISSPROT;Acc:Q9UHG3]                                                                                                                                                                             |  | 15.399 | -20.25 | 0.00110732 | 2390 | 3  | 3 | 3 [+]  |
| <b>PDCD10</b> | Programmed cell death protein 10 (TF-1 cell apoptosis-related protein 15) (Cerebral cavernous malformations 3 protein).<br>[Source:Uniprot/SWISSPROT;Acc:Q9BUL8]                                                                                                          |  | 16.33  | -16.98 | 0.0382639  | 399  | 18 | 7 | 39 [+] |

|              |                                                                                                                                                                                  |  |        |        |            |      |    |    |        |
|--------------|----------------------------------------------------------------------------------------------------------------------------------------------------------------------------------|--|--------|--------|------------|------|----|----|--------|
| <b>PDE3B</b> | cGMP-inhibited 3',5'-cyclic phosphodiesterase B (EC 3.1.4.17) (Cyclic GMP-inhibited phosphodiesterase B) (CGI-PDE B) (CGIPDE1) (CGIP1).<br>[Source:Uniprot/SWISSPROT;Acc:Q13370] |  | 16.321 | -11.02 | 0.0385606  | 1144 | 13 | 11 | 22 [+] |
| <b>PDHB</b>  | Pyruvate dehydrogenase E1 component subunit beta, mitochondrial precursor (EC 1.2.4.1) (PDHE1-B).<br>[Source:Uniprot/SWISSPROT;Acc:P11177]                                       |  | 15.984 | -16.67 | 0.00166272 | 403  | 20 | 6  | 55 [+] |
| <b>PDIA6</b> | Protein disulfide-isomerase A6 precursor (EC 5.3.4.1) (Protein disulfide isomerase P5) (Thioredoxin domain-containing protein 7).<br>[Source:Uniprot/SWISSPROT;Acc:Q15084]       |  | 18.903 | -25.71 | 2.34E-05   | 397  | 21 | 6  | 49 [+] |
| <b>PDIA6</b> | Protein disulfide-isomerase A6 precursor (EC 5.3.4.1) (Protein disulfide isomerase P5) (Thioredoxin domain-containing protein 7).<br>[Source:Uniprot/SWISSPROT;Acc:Q15084]       |  | 17.393 | -25.71 | 0.0143705  | 865  | 12 | 1  | 15 [+] |

|                 |                                                                                                                                                                                                                                                                    |  |        |        |            |     |    |   |        |
|-----------------|--------------------------------------------------------------------------------------------------------------------------------------------------------------------------------------------------------------------------------------------------------------------|--|--------|--------|------------|-----|----|---|--------|
| <b>PDIA6</b>    | Protein disulfide-isomerase A6 precursor (EC 5.3.4.1) (Protein disulfide isomerase P5) (Thioredoxin domain-containing protein 7).<br>[Source:Uniprot/SWISSPROT;Acc:Q15084]                                                                                         |  | 17.389 | -25.71 | 0.0144263  | 867 | 12 | 1 | 15 [+] |
| <b>PDZD11</b>   | PDZ domain-containing protein 11.<br>[Source:Uniprot/SWISSPROT;Acc:Q5EBL8]                                                                                                                                                                                         |  | 15.775 | -15.88 | 0.0438714  | 973 | 22 | 3 | 26 [+] |
| <b>PDZK1IP1</b> | PDZK1-interacting protein 1 (17 kDa membrane-associated protein) (Protein DD96).<br>[Source:Uniprot/SWISSPROT;Acc:Q13113]                                                                                                                                          |  | 16.078 | -19.59 | 0.00492918 | 382 | 19 | 6 | 51 [+] |
| <b>PEBP1</b>    | Phosphatidylethanolamine-binding protein 1 (PEBP-1) (Prostatic-binding protein) (HCNPpp) (Neuropolypeptide h3) (Raf kinase inhibitor protein) (RKIP) [Contains: Hippocampal cholinergic neurostimulating peptide (HCNP)].<br>[Source:Uniprot/SWISSPROT;Acc:P30086] |  | 16.545 | -16.46 | 0.00731987 | 779 | 13 | 4 | 25 [+] |
| <b>PEF1</b>     | Peflin (PEF protein with a long N-terminal hydrophobic domain) (Penta-EF hand domain-containing protein 1).<br>[Source:Uniprot/SWISSPROT;Acc:Q9UBV8]                                                                                                               |  | 16.348 | -19.76 | 8.36E-05   | 751 | 22 | 3 | 29 [+] |
| <b>PEG3</b>     | Zinc finger imprinted 2.<br>[Source:Uniprot/SWISSPROT;Acc:Q9NZV7]                                                                                                                                                                                                  |  | 16.291 | -17.06 | 0.0404523  | 126 | 7  | 1 | 16 [+] |

|               |                                                                                                                                                                                                                             |  |        |        |            |     |    |   |        |
|---------------|-----------------------------------------------------------------------------------------------------------------------------------------------------------------------------------------------------------------------------|--|--------|--------|------------|-----|----|---|--------|
| <b>PEP1</b>   | Pescadillo homolog 1.<br>[Source:Uniprot/SWISSPROT;Acc:O00541]                                                                                                                                                              |  | 15.476 | -16.52 | 0.00659698 | 420 | 22 | 5 | 61 [+] |
| <b>PEX11B</b> | Peroxisomal membrane protein 11B (Peroxin-11B) (Peroxisomal biogenesis factor 11B) (PEX11beta) (Pex11pbeta).<br>[Source:Uniprot/SWISSPROT;Acc:O96011]                                                                       |  | 15.66  | -23.48 | 0.0425894  | 811 | 24 | 5 | 33 [+] |
| <b>PEX13</b>  | Peroxisomal membrane protein PEX13 (Peroxin-13).<br>[Source:Uniprot/SWISSPROT;Acc:Q92968]                                                                                                                                   |  | 16.253 | -17.09 | 0.00064004 | 486 | 18 | 7 | 49 [+] |
| <b>PEX7</b>   | Peroxisomal targeting signal 2 receptor (PTS2 receptor) (Peroxin-7).<br>[Source:Uniprot/SWISSPROT;Acc:O00628]                                                                                                               |  | 16.065 | -10.2  | 0.00450714 | 224 | 12 | 1 | 38 [+] |
| <b>PF4V1</b>  | Platelet factor 4 variant precursor (PF4var1) (PF4alt) (CXCL4L1)<br>[Contains: Platelet factor 4 variant(4-74); Platelet factor 4 variant(5-74); Platelet factor 4 variant(6-74)].<br>[Source:Uniprot/SWISSPROT;Acc:P10720] |  | 16.838 | -14.32 | 0.0224675  | 362 | 19 | 2 | 55 [+] |
| <b>PHF1</b>   | PHD finger protein 1 (Protein PHF1).<br>[Source:Uniprot/SWISSPROT;Acc:O43189]                                                                                                                                               |  | 15.724 | -25.09 | 0.012767   | 341 | 20 | 7 | 67 [+] |



|               |                                                                                                                                                                                                                                                                            |  |        |        |            |      |    |   |        |
|---------------|----------------------------------------------------------------------------------------------------------------------------------------------------------------------------------------------------------------------------------------------------------------------------|--|--------|--------|------------|------|----|---|--------|
| <b>PHLDA1</b> | Pleckstrin homology-like domain family A member 1 (T-cell death-associated gene 51 protein) (Apoptosis-associated nuclear protein) (Proline- and histidine-rich protein) (Proline- and glutamine-rich protein) (PQ-rich protein).<br>[Source:Uniprot/SWISSPROT;Acc:Q8WV24] |  | 15.857 | -13.82 | 0.00607484 | 1000 | 21 | 4 | 34 [+] |
| <b>PHOX2B</b> | Paired mesoderm homeobox protein 2B (Paired-like homeobox 2B) (PHOX2B homeodomain protein) (Neuroblastoma Phox) (NBPhox).<br>[Source:Uniprot/SWISSPROT;Acc:Q99453]                                                                                                         |  | 15.844 | -20.6  | 0.0433464  | 1725 | 17 | 4 | 19 [+] |
| <b>PIAS3</b>  | E3 SUMO-protein ligase PIAS3 (Protein inhibitor of activated STAT protein 3).<br>[Source:Uniprot/SWISSPROT;Acc:Q9Y6X2]                                                                                                                                                     |  | 15.556 | -11.44 | 0.00114186 | 924  | 10 | 4 | 12 [+] |
| <b>PIK3C3</b> | Phosphatidylinositol 3-kinase catalytic subunit type 3 (EC 2.7.1.137) (PtdIns-3-kinase type 3) (PI3-kinase type 3) (PI3K type 3) (Phosphoinositide-3-kinase class 3) (Phosphatidylinositol 3-kinase p100 subunit).<br>[Source:Uniprot/SWISSPROT;Acc:Q8NEB9]                |  | 15.602 | -10.31 | 0.00281512 | 343  | 15 | 3 | 42 [+] |

|                |                                                                                                                                                                                                                           |  |        |        |            |      |    |   |        |
|----------------|---------------------------------------------------------------------------------------------------------------------------------------------------------------------------------------------------------------------------|--|--------|--------|------------|------|----|---|--------|
| <b>PISD</b>    | Phosphatidylserine decarboxylase proenzyme (EC 4.1.1.65) [Contains: Phosphatidylserine decarboxylase alpha chain; Phosphatidylserine decarboxylase beta chain].<br>[Source:Uniprot/SWISSPROT;Acc:Q9UG56]                  |  | 15.386 | -19.75 | 0.00082611 | 218  | 12 | 4 | 45 [+] |
| <b>PLA2G4A</b> | Cytosolic phospholipase A2 (cPLA2) (Phospholipase A2 group IVA) [Includes: Phospholipase A2 (EC 3.1.1.4) (Phosphatidylcholine 2-acylhydrolase); Lysophospholipase (EC 3.1.1.5)].<br>[Source:Uniprot/SWISSPROT;Acc:P47712] |  | 16.753 | -17.81 | 0.00043274 | 473  | 16 | 5 | 66 [+] |
| <b>PLA2G4C</b> | Cytosolic phospholipase A2 gamma precursor (EC 3.1.1.4) (cPLA2-gamma) (Phospholipase A2 group IVC).<br>[Source:Uniprot/SWISSPROT;Acc:Q9UP65]                                                                              |  | 15.307 | -13.97 | 0.00951703 | 496  | 22 | 4 | 52 [+] |
| <b>PLAC1L</b>  | Placenta-specific 1-like protein precursor.<br>[Source:Uniprot/SWISSPROT;Acc:Q86WS3]                                                                                                                                      |  | 15.683 | -15.25 | 0.00234112 | 968  | 13 | 2 | 11 [+] |
| <b>PLAGL1</b>  | Zinc finger protein PLAGL1 (Pleiomorphic adenoma-like protein 1).<br>[Source:Uniprot/SWISSPROT;Acc:Q9UM63]                                                                                                                |  | 15.866 | -23.55 | 0.00010064 | 1124 | 16 | 5 | 25 [+] |

|               |                                                                                                                                                                                                                                                                                                      |  |        |        |            |     |    |   |        |
|---------------|------------------------------------------------------------------------------------------------------------------------------------------------------------------------------------------------------------------------------------------------------------------------------------------------------|--|--------|--------|------------|-----|----|---|--------|
| <b>PLAU</b>   | Urokinase-type plasminogen activator precursor (EC 3.4.21.73) (uPA) (U-plasminogen activator) [Contains: Urokinase-type plasminogen activator long chain A; Urokinase-type plasminogen activator short chain A; Urokinase-type plasminogen activator chain B]. [Source:Uniprot/SWISSPROT;Acc:P00749] |  | 15.959 | -13.63 | 0.00455845 | 568 | 25 | 1 | 45 [+] |
| <b>PLCL2</b>  | Phospholipase C-like 2 [Source:RefSeq_peptide;Acc:NP_055999]                                                                                                                                                                                                                                         |  | 16.744 | -9.15  | 2.82E-06   | 177 | 11 | 8 | 43 [+] |
| <b>PLXDC2</b> | Plexin domain-containing protein 2 precursor (Tumor endothelial marker 7-related protein). [Source:Uniprot/SWISSPROT;Acc:Q6UX71]                                                                                                                                                                     |  | 16.681 | -18.65 | 0.0143001  | 538 | 16 | 9 | 45 [+] |
| <b>PNCK</b>   | Calcium/calmodulin-dependent protein kinase type 1B (EC 2.7.11.17) (CaM kinase IB) (CaM kinase I beta) (CaMKI-beta) (CaM-KI beta) (Pregnancy up-regulated non-ubiquitously expressed CaM kinase). [Source:Uniprot/SWISSPROT;Acc:Q6P2M8]                                                              |  | 15.952 | -12.29 | 0.00886575 | 370 | 16 | 6 | 74 [+] |
| <b>PNKD</b>   | myofibrillogenesis regulator 1 isoform 1 [Source:RefSeq_peptide;Acc:NP_056303]                                                                                                                                                                                                                       |  | 15.725 | -12.41 | 0.00305312 | 183 | 9  | 1 | 28 [+] |

|                    |                                                                                                                                                                                                                                                                                                              |  |        |        |            |      |    |   |        |
|--------------------|--------------------------------------------------------------------------------------------------------------------------------------------------------------------------------------------------------------------------------------------------------------------------------------------------------------|--|--------|--------|------------|------|----|---|--------|
| <b>POLQ</b>        | DNA polymerase theta (EC 2.7.7.7) (DNA polymerase eta).<br>[Source:Uniprot/SWISSPROT;Acc:O75417]                                                                                                                                                                                                             |  | 15.342 | -12.06 | 7.25E-05   | 873  | 23 | 4 | 41 [+] |
| <b>POM121L2</b>    | POM121 membrane glycoprotein-like 2.<br>[Source:Uniprot/SPTREMBL;Acc:Q96KW2]                                                                                                                                                                                                                                 |  | 16.329 | -15.82 | 0.0390285  | 1000 | 17 | 2 | 21 [+] |
| <b>POMC</b>        | Corticotropin-lipotropin precursor (Pro-opiomelanocortin) (POMC)<br>[Contains: NPP; Melanotropin gamma (Gamma-MSH); Potential peptide; Corticotropin (Adrenocorticotrophic hormone) (ACTH); Melanotropin alpha (Alpha-MSH); Corticotropin-like intermediary peptide<br>[Source:Uniprot/SWISSPROT;Acc:P01189] |  | 18.78  | -15.28 | 4.73E-05   | 228  | 13 | 6 | 49 [+] |
| <b>POP7</b>        | Ribonuclease P protein subunit p20 (EC 3.1.26.5) (RNaseP protein p20) (hPOP7).<br>[Source:Uniprot/SWISSPROT;Acc:O75817]                                                                                                                                                                                      |  | 15.499 | -10.87 | 0.00075442 | 241  | 14 | 4 | 51 [+] |
| <b>POTE8_HUMAN</b> | Prostate, ovary, testis-expressed protein on chromosome 8.<br>[Source:Uniprot/SWISSPROT;Acc:Q6S8J7]                                                                                                                                                                                                          |  | 16.536 | -16.16 | 0.0316779  | 436  | 14 | 1 | 25 [+] |

|                |                                                                                                                                                                                                                                                                                                          |  |        |        |            |      |    |   |        |
|----------------|----------------------------------------------------------------------------------------------------------------------------------------------------------------------------------------------------------------------------------------------------------------------------------------------------------|--|--------|--------|------------|------|----|---|--------|
| <b>PPCS</b>    | Phosphopantothenate--cysteine ligase (EC 6.3.2.5)<br>(Phosphopantothenoylcysteine synthetase) (PPC synthetase).<br>[Source:Uniprot/SWISSPROT;Acc:Q9HAB8]                                                                                                                                                 |  | 15.672 | -15.48 | 8.61E-05   | 523  | 21 | 4 | 44 [+] |
| <b>PPIL5</b>   | Peptidylprolyl isomerase-like 5 (LRR-repeat protein 1) (LRR-1) (4-1BB-mediated-signaling molecule) (4-1BB1rr).<br>[Source:Uniprot/SWISSPROT;Acc:Q96L50]                                                                                                                                                  |  | 15.386 | -17.14 | 0.00867484 | 175  | 11 | 3 | 37 [+] |
| <b>PPP2R3B</b> | Serine/threonine-protein phosphatase 2A 48 kDa regulatory subunit B (PP2A, subunit B, PR48 isoform).<br>[Source:Uniprot/SWISSPROT;Acc:Q9Y5P8]                                                                                                                                                            |  | 16.529 | -21.1  | 0.00611673 | 1000 | 22 | 2 | 26 [+] |
| <b>PPP2R5C</b> | Serine/threonine-protein phosphatase 2A 56 kDa regulatory subunit gamma isoform (PP2A, B subunit, B' gamma isoform) (PP2A, B subunit, B56 gamma isoform) (PP2A, B subunit, PR61 gamma isoform) (PP2A, B subunit, R5 gamma isoform) (Renal carcinoma antigen NY-<br>[Source:Uniprot/SWISSPROT;Acc:Q13362] |  | 17.535 | -18.99 | 0.0125644  | 238  | 8  | 1 | 17 [+] |
| <b>PQLC1</b>   | PQ-loop repeat-containing protein 1.<br>[Source:Uniprot/SWISSPROT;Acc:Q8N2U9]                                                                                                                                                                                                                            |  | 15.721 | -14.37 | 0.00078857 | 1488 | 13 | 5 | 16 [+] |

|                 |                                                                                                                                                                                                                                           |  |        |        |           |     |    |   |        |
|-----------------|-------------------------------------------------------------------------------------------------------------------------------------------------------------------------------------------------------------------------------------------|--|--------|--------|-----------|-----|----|---|--------|
| <b>PRAMEF12</b> | PRAME family member<br>DJ1198H6.2.<br>[Source:Uniprot/SWISSPROT;Acc:O<br>95522]                                                                                                                                                           |  | 15.459 | -11.36 | 0.0179358 | 307 | 17 | 2 | 41 [+] |
| <b>PRAMEF5</b>  | PRAME family member 5.<br>[Source:Uniprot/SWISSPROT;Acc:Q<br>5TYX0]                                                                                                                                                                       |  | 16.263 | -9.92  | 0.0415388 | 324 | 13 | 1 | 32 [+] |
| <b>PRAMEF6</b>  | PRAME family member 6.<br>[Source:Uniprot/SWISSPROT;Acc:Q<br>5VXH4]                                                                                                                                                                       |  | 16.263 | -9.92  | 0.0415388 | 324 | 13 | 1 | 34 [+] |
| <b>PRDX3</b>    | Thioredoxin-dependent peroxide<br>reductase, mitochondrial precursor<br>(EC 1.11.1.15) (Peroxiredoxin-3)<br>(PRX III) (Antioxidant protein 1)<br>(AOP-1) (Protein MER5 homolog)<br>(HBC189).<br>[Source:Uniprot/SWISSPROT;Acc:P<br>30048] |  | 15.831 | -16.11 | 2.31E-06  | 777 | 20 | 7 | 24 [+] |
| <b>PRICKLE1</b> | Prickle-like protein 1 (REST/NRSF-<br>interacting LIM domain protein 1).<br>[Source:Uniprot/SWISSPROT;Acc:Q<br>96MT3]                                                                                                                     |  | 17.301 | -22.31 | 0.0156788 | 537 | 20 | 6 | 53 [+] |
| <b>PRIM2A</b>   | DNA primase large subunit (EC<br>2.7.7.-) (DNA primase 58 kDa<br>subunit) (p58).<br>[Source:Uniprot/SWISSPROT;Acc:P<br>49643]                                                                                                             |  | 16.63  | -15.46 | 0.0290295 | 300 | 14 | 1 | 45 [+] |
| <b>PRKACG</b>   | cAMP-dependent protein kinase,<br>gamma-catalytic subunit (EC<br>2.7.11.11) (PKA C-gamma).<br>[Source:Uniprot/SWISSPROT;Acc:P<br>22612]                                                                                                   |  | 15.525 | -16.53 | 0.0382701 | 532 | 20 | 2 | 41 [+] |

|               |                                                                                                                                                                                                                                                                                                   |  |        |        |            |     |    |   |        |
|---------------|---------------------------------------------------------------------------------------------------------------------------------------------------------------------------------------------------------------------------------------------------------------------------------------------------|--|--------|--------|------------|-----|----|---|--------|
| <b>PRKAG2</b> | 5'-AMP-activated protein kinase subunit gamma-2 (AMPK gamma-2 chain) (AMPK gamma2) (H91620p). [Source:Uniprot/SWISSPROT;Acc:Q9UGJ0]                                                                                                                                                               |  | 16.517 | -13.47 | 0.00020608 | 260 | 14 | 5 | 59 [+] |
| <b>PRKCD</b>  | Protein kinase C delta type (EC 2.7.11.13) (nPKC-delta). [Source:Uniprot/SWISSPROT;Acc:Q05655]                                                                                                                                                                                                    |  | 15.963 | -11.09 | 0.00025837 | 449 | 19 | 8 | 67 [+] |
| <b>PROC</b>   | Vitamin K-dependent protein C precursor (EC 3.4.21.69) (Autoprothrombin IIA) (Anticoagulant protein C) (Blood coagulation factor XIV) [Contains: Vitamin K-dependent protein C light chain; Vitamin K-dependent protein C heavy chain; Activation peptide]. [Source:Uniprot/SWISSPROT;Acc:P04070] |  | 16.065 | -18.46 | 0.00247516 | 296 | 18 | 5 | 79 [+] |
| <b>PROCR</b>  | Endothelial protein C receptor precursor (Endothelial cell protein C receptor) (Activated protein C receptor) (APC receptor) (CD201 antigen). [Source:Uniprot/SWISSPROT;Acc:Q9UNN8]                                                                                                               |  | 15.566 | -15.11 | 0.0022443  | 549 | 19 | 5 | 44 [+] |

|               |                                                                                                                                                     |  |        |        |            |      |    |   |        |
|---------------|-----------------------------------------------------------------------------------------------------------------------------------------------------|--|--------|--------|------------|------|----|---|--------|
| <b>PROKR1</b> | Prokineticin receptor 1 (PK-R1) (G-protein coupled receptor 73) (GPR73a) (G-protein coupled receptor ZAQ).<br>[Source:Uniprot/SWISSPROT;Acc:Q8TCW9] |  | 15.433 | -18.19 | 0.0478123  | 1000 | 14 | 4 | 19 [+] |
| <b>PROX1</b>  | Homeobox prospero-like protein PROX1 (PROX 1).<br>[Source:Uniprot/SWISSPROT;Acc:Q92786]                                                             |  | 17.196 | -11.14 | 0.00305312 | 105  | 6  | 1 | 19 [+] |
| <b>PRR6</b>   | Proline-rich protein 6 (Nuclear protein p30).<br>[Source:Uniprot/SWISSPROT;Acc:Q7Z7K6]                                                              |  | 18.101 | -18.7  | 0.00735609 | 282  | 15 | 7 | 63 [+] |
| <b>PRRC1</b>  | proline-rich coiled-coil 1<br>[Source:RefSeq_peptide;Acc:NP_570721]                                                                                 |  | 15.947 | -24.2  | 0.00207417 | 1000 | 15 | 3 | 15 [+] |
| <b>PRSS16</b> | Thymus-specific serine protease precursor (EC 3.4.-.-) (Serine protease 16).<br>[Source:Uniprot/SWISSPROT;Acc:Q9NQE7]                               |  | 15.98  | -15.56 | 0.0270235  | 1254 | 16 | 5 | 20 [+] |
| <b>PRSS16</b> | Thymus-specific serine protease precursor (EC 3.4.-.-) (Serine protease 16).<br>[Source:Uniprot/SWISSPROT;Acc:Q9NQE7]                               |  | 16.13  | -15.56 | 0.0458863  | 1155 | 16 | 1 | 15 [+] |



|              |                                                                                                                                                                                                                                                    |        |        |            |     |    |   |        |
|--------------|----------------------------------------------------------------------------------------------------------------------------------------------------------------------------------------------------------------------------------------------------|--------|--------|------------|-----|----|---|--------|
| <b>PSG9</b>  | Pregnancy-specific beta-1-glycoprotein 9 precursor (PSBG-9) (Pregnancy-specific glycoprotein 9) (Pregnancy-specific beta-1 glycoprotein B) (PS-beta-B) (PS34) (Pregnancy-specific glycoprotein 7) (PSG7).<br>[Source:Uniprot/SWISSPROT;Acc:Q00887] | 18.4   | -14.9  | 0.00554174 | 323 | 15 | 2 | 36 [+] |
| <b>PSG9</b>  | Pregnancy-specific beta-1-glycoprotein 9 precursor (PSBG-9) (Pregnancy-specific glycoprotein 9) (Pregnancy-specific beta-1 glycoprotein B) (PS-beta-B) (PS34) (Pregnancy-specific glycoprotein 7) (PSG7).<br>[Source:Uniprot/SWISSPROT;Acc:Q00887] | 18.387 | -14.9  | 0.00560908 | 325 | 15 | 1 | 37 [+] |
| <b>PSMA7</b> | Proteasome subunit alpha type 7 (EC 3.4.25.1) (Proteasome subunit RC6-1) (Proteasome subunit XAPC7).<br>[Source:Uniprot/SWISSPROT;Acc:O14818]                                                                                                      | 15.725 | -13.41 | 0.00774697 | 122 | 6  | 5 | 18 [+] |

|              |                                                                                                                                                                                                                                                                                                           |  |        |        |            |      |    |   |        |
|--------------|-----------------------------------------------------------------------------------------------------------------------------------------------------------------------------------------------------------------------------------------------------------------------------------------------------------|--|--------|--------|------------|------|----|---|--------|
| <b>PSMB5</b> | Proteasome subunit beta type 5 precursor (EC 3.4.25.1) (Proteasome epsilon chain) (Macropain epsilon chain) (Multicatalytic endopeptidase complex epsilon chain) (Proteasome subunit X) (Proteasome chain 6) (Proteasome subunit MB1).<br>[Source:Uniprot/SWISSPROT;Acc:P28074]                           |  | 16.517 | -11.01 | 0.00883098 | 238  | 14 | 5 | 66 [+] |
| <b>PSMD1</b> | 26S proteasome non-ATPase regulatory subunit 1 (26S proteasome regulatory subunit RPN2) (26S proteasome regulatory subunit S1) (26S proteasome subunit p112).<br>[Source:Uniprot/SWISSPROT;Acc:Q99460]                                                                                                    |  | 16.065 | -17.01 | 0.0499184  | 229  | 12 | 5 | 46 [+] |
| <b>PSME1</b> | Proteasome activator complex subunit 1 (Proteasome activator 28-alpha subunit) (PA28alpha) (PA28a) (Activator of multicatalytic protease subunit 1) (11S regulator complex subunit alpha) (REG-alpha) (Interferon gamma up-regulated I-5111 protein) (IGUP I-51)<br>[Source:Uniprot/SWISSPROT;Acc:Q06323] |  | 16.13  | -19.38 | 0.0469724  | 1000 | 9  | 1 | 10 [+] |
| <b>PSPC1</b> | Paraspeckle protein 1<br>[Source:RefSeq_peptide;Acc:NP_001035879]                                                                                                                                                                                                                                         |  | 16.432 | -17.13 | 9.84E-05   | 675  | 24 | 8 | 43 [+] |

|               |                                                                                                                                                                                |  |        |        |            |      |    |   |        |
|---------------|--------------------------------------------------------------------------------------------------------------------------------------------------------------------------------|--|--------|--------|------------|------|----|---|--------|
| <b>PSPC1</b>  | Paraspeckle protein 1<br>[Source:RefSeq_peptide;Acc:NP_001035879]+B749                                                                                                         |  | 16.164 | -15.14 | 0.0455036  | 342  | 19 | 1 | 48 [+] |
| <b>PTCD3</b>  | Pentatricopeptide repeat domain 3<br>[Source:RefSeq_peptide;Acc:NP_060422]                                                                                                     |  | 16.344 | -17.51 | 0.0377652  | 1000 | 12 | 1 | 14 [+] |
| <b>PTGER3</b> | Prostaglandin E2 receptor, EP3 subtype (Prostanoid EP3 receptor) (PGE receptor, EP3 subtype) (PGE2-R).<br>[Source:Uniprot/SWISSPROT;Acc:P43115]                                |  | 15.574 | -12.58 | 0.00291983 | 1000 | 10 | 1 | 10 [+] |
| <b>PTGER3</b> | Prostaglandin E2 receptor, EP3 subtype (Prostanoid EP3 receptor) (PGE receptor, EP3 subtype) (PGE2-R).<br>[Source:Uniprot/SWISSPROT;Acc:P43115]                                |  | 16.351 | -14.57 | 0.0382609  | 1000 | 6  | 1 | 8 [+]  |
| <b>PTGES</b>  | Prostaglandin E synthase (EC 5.3.99.3) (Microsomal glutathione S-transferase 1-like 1) (MGST1-L1) (p53-induced apoptosis protein 12).<br>[Source:Uniprot/SWISSPROT;Acc:O14684] |  | 16.647 | -21.6  | 0.02859    | 1278 | 18 | 3 | 22 [+] |
| <b>PTPRK</b>  | Receptor-type tyrosine-protein phosphatase kappa precursor (EC 3.1.3.48) (Protein-tyrosine phosphatase kappa) (R-PTP-kappa).<br>[Source:Uniprot/SWISSPROT;Acc:Q15262]          |  | 18.201 | -20.25 | 0.0033015  | 383  | 17 | 1 | 50 [+] |

|                     |                                                                                                                              |  |        |        |            |      |    |   |        |
|---------------------|------------------------------------------------------------------------------------------------------------------------------|--|--------|--------|------------|------|----|---|--------|
| <b>PWP2</b>         | Periodic tryptophan protein 2 homolog.<br>[Source:Uniprot/SWISSPROT;Acc:Q15269]                                              |  | 18.402 | -20.01 | 0.00553027 | 409  | 18 | 4 | 52 [+] |
| <b>PXMP2</b>        | Peroxisomal membrane protein 2 (22 kDa peroxisomal membrane protein).<br>[Source:Uniprot/SWISSPROT;Acc:Q9NR77]               |  | 17.516 | -10.23 | 0.0128007  | 303  | 19 | 7 | 68 [+] |
| <b>Q08AG5_HUMAN</b> | CDNA FLJ14959 fis, clone PLACE4000156, moderately similar to ZINC FINGER PROTEIN 91.<br>[Source:Uniprot/SPTREMBL;Acc:Q96JV1] |  | 16.018 | -15.25 | 0.00015276 | 693  | 16 | 2 | 18 [+] |
| <b>Q58FF5_HUMAN</b> | Heat shock protein 90Be.<br>[Source:Uniprot/SPTREMBL;Acc:Q58FF5]                                                             |  | 16.645 | -17.01 | 0.00758838 | 1000 | 15 | 3 | 20 [+] |
| <b>Q58FF7_HUMAN</b> | Heat shock protein 90Bc.<br>[Source:Uniprot/SPTREMBL;Acc:Q58FF7]                                                             |  | 16.158 | -20.87 | 0.0457844  | 1000 | 9  | 1 | 11 [+] |
| <b>Q5BLP7_HUMAN</b> | CH41746 (Fragment).<br>[Source:Uniprot/SPTREMBL;Acc:Q5BLP7]                                                                  |  | 15.585 | -10.33 | 0.00449708 | 1000 | 20 | 2 | 27 [+] |
| <b>Q5JWK4_HUMAN</b> | OTTHUMP00000017299 (Fragment).<br>[Source:Uniprot/SPTREMBL;Acc:Q5JWK4]                                                       |  | 15.946 | -16.67 | 0.0127963  | 1000 | 17 | 3 | 21 [+] |
| <b>Q5T6E0_HUMAN</b> | Ribosomal protein L15 pseudogene 3.<br>[Source:Uniprot/SPTREMBL;Acc:Q5T6E0]                                                  |  | 16.357 | -17    | 0.00682976 | 1000 | 18 | 2 | 28 [+] |

|                     |                                                                                |  |        |        |            |      |    |   |        |
|---------------------|--------------------------------------------------------------------------------|--|--------|--------|------------|------|----|---|--------|
| <b>Q5VVH2_HUMAN</b> | Peptidyl-prolyl cis-trans isomerase.<br>[Source:Uniprot/SPTREMBL;Acc:Q5VVH2]   |  | 15.745 | -16.83 | 0.00367203 | 1000 | 16 | 1 | 14 [+] |
| <b>Q5VVH2_HUMAN</b> | Peptidyl-prolyl cis-trans isomerase.<br>[Source:Uniprot/SPTREMBL;Acc:Q5VVH2]   |  | 15.525 | -16.83 | 0.00452705 | 1141 | 13 | 2 | 10 [+] |
| <b>Q5W0B8_HUMAN</b> | Novel protein (Fragment).<br>[Source:Uniprot/SPTREMBL;Acc:Q5W0B8]              |  | 16.172 | -22.71 | 0.0451816  | 1000 | 14 | 2 | 19 [+] |
| <b>Q6ZP28_HUMAN</b> | CDNA FLJ26662 fis, clone MPG02040.<br>[Source:Uniprot/SPTREMBL;Acc:Q6ZP28]     |  | 16.23  | -21    | 0.0428208  | 1000 | 6  | 1 | 10 [+] |
| <b>Q6ZP58_HUMAN</b> | CDNA FLJ26470 fis, clone KDN04339.<br>[Source:Uniprot/SPTREMBL;Acc:Q6ZP58]     |  | 15.769 | -17.47 | 0.00051901 | 1000 | 15 | 3 | 20 [+] |
| <b>Q6ZP63_HUMAN</b> | CDNA FLJ26452 fis, clone KDN03243.<br>[Source:Uniprot/SPTREMBL;Acc:Q6ZP63]     |  | 16.41  | -12.57 | 0.0362091  | 1000 | 18 | 1 | 18 [+] |
| <b>Q6ZUP2_HUMAN</b> | CDNA FLJ43495 fis, clone PEBLM2000338.<br>[Source:Uniprot/SPTREMBL;Acc:Q6ZUP2] |  | 16.879 | -13.89 | 0.0233331  | 569  | 14 | 2 | 24 [+] |
| <b>Q6ZV65_HUMAN</b> | CDNA FLJ42946 fis, clone BRSTN2005721.<br>[Source:Uniprot/SPTREMBL;Acc:Q6ZV65] |  | 15.499 | -8.22  | 0.00014615 | 296  | 16 | 4 | 47 [+] |
| <b>Q7Z2F6_HUMAN</b> | Zinc finger protein 720.<br>[Source:Uniprot/SPTREMBL;Acc:Q7Z2F6]               |  | 15.803 | -10.65 | 0.00265626 | 439  | 18 | 2 | 41 [+] |

|                      |                                                                                                                                                                                                                            |  |        |        |            |      |    |   |        |
|----------------------|----------------------------------------------------------------------------------------------------------------------------------------------------------------------------------------------------------------------------|--|--------|--------|------------|------|----|---|--------|
| <b>Q86U89_HUMAN</b>  | PHD finger (PHF20L1 protein).<br>[Source:Uniprot/SPTREMBL;Acc:Q86U89]                                                                                                                                                      |  | 16.056 | -16.8  | 0.0184852  | 905  | 18 | 3 | 28 [+] |
| <b>Q8I WV4_HUMAN</b> | Nucleoporin.<br>[Source:Uniprot/SPTREMBL;Acc:Q8I WV4]                                                                                                                                                                      |  | 16.804 | -23.63 | 0.0250234  | 3045 | 1  | 1 | 1 [+]  |
| <b>Q8NF41_HUMAN</b>  | NOT ANNOTATED                                                                                                                                                                                                              |  | 17.026 | -20.27 | 0.0203083  | 1000 | 17 | 2 | 20 [+] |
| <b>Q8NHB0_HUMAN</b>  | Seven transmembrane helix receptor.<br>[Source:Uniprot/SPTREMBL;Acc:Q8NHB0]                                                                                                                                                |  | 15.632 | -24.95 | 0.00308792 | 1000 | 15 | 2 | 15 [+] |
| <b>Q8WWB0_HUMAN</b>  | STEAP4 protein.<br>[Source:Uniprot/SPTREMBL;Acc:Q8WWB0]                                                                                                                                                                    |  | 16.816 | -14.57 | 0.0247411  | 1368 | 11 | 1 | 10 [+] |
| <b>Q92967_HUMAN</b>  | Zinc finger protein zfp6 (Fragment).<br>[Source:Uniprot/SPTREMBL;Acc:Q92967]                                                                                                                                               |  | 15.469 | -15.04 | 0.00012851 | 1000 | 16 | 2 | 15 [+] |
| <b>Q96AM0_HUMAN</b>  | NLRP1 protein.<br>[Source:Uniprot/SPTREMBL;Acc:Q96AM0]                                                                                                                                                                     |  | 16.442 | -14.05 | 0.0351504  | 375  | 16 | 1 | 37 [+] |
| <b>Q96CK5_HUMAN</b>  | Homolog of Homo sapiens "PREDICTED "KIAA0226 gene product<br>[Source:IPI;Acc:IPI00022496]"Homolog of Homo sapiens "PREDICTED "KIAA0226 gene product<br>[Source:IPI;Acc:IPI00022496]" BY ORTHOLOGY<br>TO:SINFRUT00000163195 |  | 17.509 | -24.51 | 0.0128867  | 1000 | 17 | 4 | 20 [+] |
| <b>Q96HG9_HUMAN</b>  | NOT ANNOTATED                                                                                                                                                                                                              |  | 16.23  | -16.95 | 0.0428208  | 1000 | 11 | 1 | 11 [+] |

|                     |                                                                                                                                 |  |        |        |            |      |    |   |        |
|---------------------|---------------------------------------------------------------------------------------------------------------------------------|--|--------|--------|------------|------|----|---|--------|
| <b>Q9H693_HUMAN</b> | CDNA: FLJ22477 fis, clone HRC10815.<br>[Source:Uniprot/SPTREMBL;Acc:Q9H693]                                                     |  | 16.178 | -8.73  | 0.00147165 | 299  | 15 | 6 | 61 [+] |
| <b>Q9P162_HUMAN</b> | NOT ANNOTATED                                                                                                                   |  | 15.533 | -13.54 | 0.00367928 | 1000 | 7  | 1 | 6 [+]  |
| <b>Q9UK71_HUMAN</b> | Lithium-sensitive myo-inositol monophosphatase A1 (EC 3.1.3.25) (Fragment).<br>[Source:Uniprot/SPTREMBL;Acc:Q9UK71]             |  | 16.447 | -16.99 | 0.00425166 | 1000 | 9  | 1 | 12 [+] |
| <b>QDPR</b>         | Dihydropteridine reductase (EC 1.5.1.34) (HDHPR) (Quinoid dihydropteridine reductase).<br>[Source:Uniprot/SWISSPROT;Acc:P09417] |  | 15.412 | -11.24 | 0.00140717 | 733  | 19 | 5 | 36 [+] |
| <b>RAB38</b>        | Ras-related protein Rab-38 (Antigen NY-MEL-1).<br>[Source:Uniprot/SWISSPROT;Acc:P57729]                                         |  | 17.16  | -17.63 | 0.00072456 | 708  | 22 | 7 | 28 [+] |
| <b>RAB3IP</b>       | RAB3A-interacting protein (Rabin-3) (SSX2-interacting protein).<br>[Source:Uniprot/SWISSPROT;Acc:Q96QF0]                        |  | 16.178 | -12.13 | 0.00861315 | 277  | 14 | 6 | 50 [+] |
| <b>RAD51C</b>       | DNA repair protein RAD51 homolog 3 (R51H3) (RAD51-like protein 2).<br>[Source:Uniprot/SWISSPROT;Acc:O43502]                     |  | 15.386 | -12.73 | 0.00094675 | 107  | 5  | 5 | 19 [+] |
| <b>RAE1</b>         | mRNA-associated protein mrnp 41 (Rae1 protein homolog).<br>[Source:Uniprot/SWISSPROT;Acc:P78406]                                |  | 16.34  | -19.29 | 5.74E-05   | 1056 | 22 | 8 | 33 [+] |

|                |                                                                                                                                                                                                                |  |        |        |            |      |    |   |        |
|----------------|----------------------------------------------------------------------------------------------------------------------------------------------------------------------------------------------------------------|--|--------|--------|------------|------|----|---|--------|
| <b>RALA</b>    | Ras-related protein Ral-A precursor.<br>[Source:Uniprot/SWISSPROT;Acc:P11233]                                                                                                                                  |  | 15.391 | -14.66 | 0.00028219 | 1871 | 2  | 4 | 2 [+]  |
| <b>RANBP3</b>  | Ran-binding protein 3 (RanBP3).<br>[Source:Uniprot/SWISSPROT;Acc:Q9H6Z4]                                                                                                                                       |  | 17.535 | -15.3  | 0.00017687 | 230  | 13 | 6 | 58 [+] |
| <b>RAPGEF4</b> | Rap guanine nucleotide exchange factor 4 (cAMP-regulated guanine nucleotide exchange factor II) (cAMP-GEFII) (Exchange factor directly activated by cAMP 2) (Epac 2).<br>[Source:Uniprot/SWISSPROT;Acc:Q8WZA2] |  | 15.425 | -11.12 | 0.00067856 | 1123 | 13 | 5 | 17 [+] |
| <b>RASGRP4</b> | RAS guanyl releasing protein 4<br>[Source:RefSeq_peptide;Acc:NP_733749]                                                                                                                                        |  | 16.79  | -16.78 | 0.0253608  | 398  | 18 | 5 | 46 [+] |
| <b>RASIP1</b>  | Ras-interacting protein 1 (Rain).<br>[Source:Uniprot/SWISSPROT;Acc:Q5U651]                                                                                                                                     |  | 16.065 | -20.13 | 0.0499184  | 212  | 11 | 6 | 41 [+] |
| <b>RASSF1</b>  | Ras association domain-containing protein 1.<br>[Source:Uniprot/SWISSPROT;Acc:Q9NS23]                                                                                                                          |  | 15.488 | -15.82 | 0.00010392 | 795  | 27 | 6 | 36 [+] |
| <b>RASSF6</b>  | Ras association domain-containing protein 6.<br>[Source:Uniprot/SWISSPROT;Acc:Q6ZTQ3]                                                                                                                          |  | 16.572 | -14.71 | 0.0311281  | 371  | 16 | 1 | 40 [+] |



|               |                                                                                                                                                                                                                                                     |  |        |        |            |      |    |   |        |
|---------------|-----------------------------------------------------------------------------------------------------------------------------------------------------------------------------------------------------------------------------------------------------|--|--------|--------|------------|------|----|---|--------|
| <b>RBBP7</b>  | Histone-binding protein RBBP7 (Retinoblastoma-binding protein 7) (RBBP-7) (Retinoblastoma-binding protein p46) (Histone acetyltransferase type B subunit 2) (Nucleosome remodeling factor subunit RBAP46).<br>[Source:Uniprot/SWISSPROT;Acc:Q16576] |  | 16.964 | -13.5  | 0.021545   | 381  | 17 | 1 | 48 [+] |
| <b>RBM10</b>  | RNA-binding protein 10 (RNA-binding motif protein 10) (G patch domain- containing protein 9).<br>[Source:Uniprot/SWISSPROT;Acc:P98175]                                                                                                              |  | 16.857 | -19.92 | 0.00759407 | 212  | 11 | 4 | 43 [+] |
| <b>RBM22</b>  | Pre-mRNA-splicing factor RBM22 (RNA-binding motif protein 22) (Zinc finger CCCH domain-containing protein 16).<br>[Source:Uniprot/SWISSPROT;Acc:Q9NW64]                                                                                             |  | 15.536 | -17.59 | 0.00063295 | 957  | 7  | 6 | 10 [+] |
| <b>RCBTB2</b> | RCC1 and BTB domain-containing protein 2 (Regulator of chromosome condensation and BTB domain-containing protein 2) (Chromosome condensation 1-like) (CHC1-L) (RCC1-like G exchanging factor).<br>[Source:Uniprot/SWISSPROT;Acc:O95199]             |  | 16.911 | -14.64 | 0.00074059 | 1144 | 15 | 3 | 18 [+] |
| <b>RDH16</b>  | Retinol dehydrogenase 16<br>[Source:RefSeq_peptide;Acc:NP_003699]                                                                                                                                                                                   |  | 16.927 | -18.96 | 0.0223027  | 1000 | 18 | 3 | 26 [+] |

|              |                                                                                                                                                           |        |        |            |     |    |   |        |
|--------------|-----------------------------------------------------------------------------------------------------------------------------------------------------------|--------|--------|------------|-----|----|---|--------|
| <b>REC8</b>  | Meiotic recombination protein REC8-like 1 (Cohesin Rec8p).<br>[Source:Uniprot/SWISSPROT;Acc:O95072]                                                       | 17.762 | -16.24 | 0.00962523 | 161 | 10 | 2 | 37 [+] |
| <b>RECQL</b> | ATP-dependent DNA helicase Q1 (EC 3.6.1.-) (DNA-dependent ATPase Q1).<br>[Source:Uniprot/SWISSPROT;Acc:P46063]                                            | 15.836 | -9.92  | 0.00023794 | 412 | 19 | 4 | 47 [+] |
| <b>REG4</b>  | Regenerating islet-derived protein 4 precursor (Reg IV) (REG-like protein) (Gastrointestinal secretory protein).<br>[Source:Uniprot/SWISSPROT;Acc:Q9BYZ8] | 16.155 | -11.73 | 0.0458881  | 600 | 14 | 2 | 22 [+] |
| <b>REN</b>   | Renin precursor (EC 3.4.23.15) (Angiotensinogenase).<br>[Source:Uniprot/SWISSPROT;Acc:P00797]                                                             | 16.404 | -16.14 | 0.036402   | 197 | 11 | 5 | 32 [+] |
| <b>REN</b>   | Renin precursor (EC 3.4.23.15) (Angiotensinogenase).<br>[Source:Uniprot/SWISSPROT;Acc:P00797]                                                             | 16.404 | -16.14 | 0.036402   | 196 | 10 | 1 | 25 [+] |
| <b>REPS2</b> | RalBP1-associated Eps domain-containing protein 2 (RalBP1-interacting protein 2) (Partner of RalBP1).<br>[Source:Uniprot/SWISSPROT;Acc:Q8NFH8]            | 16.97  | -10.58 | 0.00201225 | 131 | 8  | 4 | 32 [+] |

|                |                                                                                                                                                                                               |        |        |            |      |    |   |        |
|----------------|-----------------------------------------------------------------------------------------------------------------------------------------------------------------------------------------------|--------|--------|------------|------|----|---|--------|
| <b>RFC3</b>    | Replication factor C subunit 3 (Replication factor C 38 kDa subunit) (RFC38) (Activator 1 38 kDa subunit) (A1 38 kDa subunit) (RF-C 38 kDa subunit).<br>[Source:Uniprot/SWISSPROT;Acc:P40938] | 18.775 | -23.75 | 0.00388207 | 1201 | 13 | 3 | 16 [+] |
| <b>RGMA</b>    | Repulsive guidance molecule A precursor (RGM domain family member A).<br>[Source:Uniprot/SWISSPROT;Acc:Q96B86]                                                                                | 15.522 | -20.96 | 2.94E-06   | 1581 | 9  | 6 | 14 [+] |
| <b>RGS22</b>   | Regulator of G-protein signaling 22 (RGS22).<br>[Source:Uniprot/SWISSPROT;Acc:Q8NE09]                                                                                                         | 16.404 | -12.51 | 0.00891802 | 193  | 10 | 2 | 39 [+] |
| <b>RGS4</b>    | Regulator of G-protein signaling 4 (RGS4) (RGP4).<br>[Source:Uniprot/SWISSPROT;Acc:P49798]                                                                                                    | 16.63  | -15.01 | 0.0294592  | 256  | 14 | 1 | 48 [+] |
| <b>RHOBTB2</b> | Rho-related BTB domain-containing protein 2 (Deleted in breast cancer 2 gene protein) (p83).<br>[Source:Uniprot/SWISSPROT;Acc:Q9BYZ6]                                                         | 17.507 | -29    | 0.0129083  | 964  | 18 | 4 | 28 [+] |
| <b>RHOG</b>    | Rho-related GTP-binding protein RhoG precursor.<br>[Source:Uniprot/SWISSPROT;Acc:P84095]                                                                                                      | 15.368 | -14.51 | 0.0307037  | 581  | 21 | 7 | 35 [+] |

|               |                                                                                                                                                |        |        |            |      |    |   |        |
|---------------|------------------------------------------------------------------------------------------------------------------------------------------------|--------|--------|------------|------|----|---|--------|
| <b>RKHD1</b>  | RNA-binding protein MEX3D (RING finger and KH domain-containing protein 1) (RING finger protein 193).<br>[Source:Uniprot/SWISSPROT;Acc:Q86XN8] | 16.156 | -23.93 | 0.0458805  | 890  | 12 | 1 | 18 [+] |
| <b>RLF</b>    | Zinc finger protein Rlf (Rearranged L-myc fusion gene protein) (Zn-15-related protein).<br>[Source:Uniprot/SWISSPROT;Acc:Q13129]               | 15.812 | -16.69 | 0.00109026 | 474  | 25 | 8 | 65 [+] |
| <b>RNASE9</b> | Ribonuclease-like protein 9 precursor.<br>[Source:Uniprot/SWISSPROT;Acc:P60153]                                                                | 15.452 | -11.73 | 0.00737981 | 1000 | 16 | 3 | 19 [+] |
| <b>RNASEN</b> | Ribonuclease 3 (EC 3.1.26.3) (Ribonuclease III) (RNase III) (Drosha) (p241).<br>[Source:Uniprot/SWISSPROT;Acc:Q9NRR4]                          | 17.35  | -15.26 | 0.00066371 | 370  | 20 | 8 | 58 [+] |
| <b>RNASEN</b> | Ribonuclease 3 (EC 3.1.26.3) (Ribonuclease III) (RNase III) (Drosha) (p241).<br>[Source:Uniprot/SWISSPROT;Acc:Q9NRR4]                          | 15.632 | -15.26 | 0.00375661 | 1000 | 7  | 1 | 7 [+]  |
| <b>RNF145</b> | Ring finger protein 145 (RNF145), mRNA<br>[Source:RefSeq_dna;Acc:NM_144726]                                                                    | 17.034 | -19.67 | 0.0201627  | 1259 | 9  | 2 | 12 [+] |
| <b>RNF207</b> | Ring finger protein 207 (RNF207), mRNA<br>[Source:RefSeq_dna;Acc:NM_207396]                                                                    | 16.783 | -15.38 | 0.0255418  | 390  | 19 | 1 | 35 [+] |

|               |                                                                                                                                                                                                                                                                                                                   |  |        |        |            |      |    |   |        |
|---------------|-------------------------------------------------------------------------------------------------------------------------------------------------------------------------------------------------------------------------------------------------------------------------------------------------------------------|--|--------|--------|------------|------|----|---|--------|
| <b>RNF212</b> | RING finger protein 212.<br>[Source:Uniprot/SWISSPROT;Acc:Q495C1]                                                                                                                                                                                                                                                 |  | 16.291 | -12.03 | 0.0186589  | 118  | 7  | 3 | 30 [+] |
| <b>RNF34</b>  | E3 ubiquitin-protein ligase RNF34<br>(EC 6.3.2.-) (RING finger protein 34)<br>(RING finger protein RIFF) (FYVE-RING finger protein Momo) (Human RING finger homologous to inhibitor of apoptosis protein) (hRFI)<br>(Caspases-8 and -10-associated RING finger protein 1<br>[Source:Uniprot/SWISSPROT;Acc:Q969K3] |  | 16.242 | -17.89 | 7.18E-05   | 776  | 21 | 5 | 32 [+] |
| <b>RNF34</b>  | E3 ubiquitin-protein ligase RNF34<br>(EC 6.3.2.-) (RING finger protein 34)<br>(RING finger protein RIFF) (FYVE-RING finger protein Momo) (Human RING finger homologous to inhibitor of apoptosis protein) (hRFI)<br>(Caspases-8 and -10-associated RING finger protein 1<br>[Source:Uniprot/SWISSPROT;Acc:Q969K3] |  | 16.244 | -17.89 | 0.00372851 | 775  | 15 | 1 | 20 [+] |
| <b>RNF6</b>   | RING finger protein 6 (RING-H2 protein).<br>[Source:Uniprot/SWISSPROT;Acc:Q9Y252]                                                                                                                                                                                                                                 |  | 15.746 | -11.83 | 5.68E-05   | 1056 | 18 | 8 | 20 [+] |

|               |                                                                                                                                                                                    |  |        |        |            |      |    |   |        |
|---------------|------------------------------------------------------------------------------------------------------------------------------------------------------------------------------------|--|--------|--------|------------|------|----|---|--------|
| <b>RPN2</b>   | Dolichyl-diphosphooligosaccharide--protein glycosyltransferase 63 kDa subunit precursor (EC 2.4.1.119) (Ribophorin II) (RPN-II) (RIBIIR).<br>[Source:Uniprot/SWISSPROT;Acc:P04844] |  | 16.291 | -10.68 | 0.00481671 | 302  | 15 | 4 | 40 [+] |
| <b>RPN2</b>   | Dolichyl-diphosphooligosaccharide--protein glycosyltransferase 63 kDa subunit precursor (EC 2.4.1.119) (Ribophorin II) (RPN-II) (RIBIIR).<br>[Source:Uniprot/SWISSPROT;Acc:P04844] |  | 16.291 | -10.68 | 0.0404523  | 308  | 14 | 1 | 28 [+] |
| <b>RPS27</b>  | 40S ribosomal protein S27 (Metallopan-stimulin 1) (MPS-1).<br>[Source:Uniprot/SWISSPROT;Acc:P42677]                                                                                |  | 16.375 | -10.88 | 0.0373924  | 389  | 20 | 1 | 43 [+] |
| <b>RPS27A</b> | 40S ribosomal protein S27a.<br>[Source:Uniprot/SWISSPROT;Acc:P62979]                                                                                                               |  | 15.493 | -19.19 | 0.00101243 | 1000 | 18 | 3 | 20 [+] |
| <b>RRH</b>    | Visual pigment-like receptor peropsin.<br>[Source:Uniprot/SWISSPROT;Acc:O14718]                                                                                                    |  | 16.115 | -18.93 | 0.00668298 | 510  | 22 | 4 | 51 [+] |
| <b>RUFY2</b>  | RUN and FYVE domain-containing protein 2 (Rab4-interacting protein related).<br>[Source:Uniprot/SWISSPROT;Acc:Q8WXA3]                                                              |  | 15.545 | -15.39 | 0.00055198 | 1000 | 14 | 3 | 22 [+] |
| <b>RUFY2</b>  | RUN and FYVE domain-containing protein 2 (Rab4-interacting protein related).<br>[Source:Uniprot/SWISSPROT;Acc:Q8WXA3]                                                              |  | 16.301 | -15.39 | 0.0392867  | 623  | 16 | 1 | 22 [+] |

|               |                                                                                                                                                                                                                     |  |        |        |            |      |    |   |        |
|---------------|---------------------------------------------------------------------------------------------------------------------------------------------------------------------------------------------------------------------|--|--------|--------|------------|------|----|---|--------|
| <b>S100Z</b>  | Protein S100-Z (S100 calcium-binding protein Z).<br>[Source:Uniprot/SWISSPROT;Acc:Q8WXG8]                                                                                                                           |  | 17.571 | -16.51 | 0.0121536  | 312  | 14 | 3 | 51 [+] |
| <b>SACM1L</b> | Suppressor of actin 1<br>[Source:RefSeq_peptide;Acc:NP_054735]                                                                                                                                                      |  | 15.533 | -14.39 | 0.0076551  | 1000 | 18 | 4 | 25 [+] |
| <b>SAMD7</b>  | Sterile alpha motif domain-containing protein 7.<br>[Source:Uniprot/SWISSPROT;Acc:Q7Z3H4]                                                                                                                           |  | 15.808 | -17.5  | 0.00052533 | 652  | 15 | 3 | 24 [+] |
| <b>SAP30</b>  | Histone deacetylase complex subunit SAP30 (Sin3-associated polypeptide, 30 kDa) (Sin3 corepressor complex subunit SAP30).<br>[Source:Uniprot/SWISSPROT;Acc:O75446]                                                  |  | 16.857 | -12.63 | 0.00285709 | 204  | 7  | 9 | 28 [+] |
| <b>SAT1</b>   | Diamine acetyltransferase 1 (EC 2.3.1.57) (Spermidine/spermine N(1)-acetyltransferase 1) (SSAT) (SSAT-1) (Putrescine acetyltransferase) (Polyamine N-acetyltransferase 1).<br>[Source:Uniprot/SWISSPROT;Acc:P21673] |  | 16.297 | -21.7  | 0.00364611 | 318  | 18 | 9 | 69 [+] |

|                   |                                                                                                                                                                                                                     |  |        |        |            |      |    |    |        |
|-------------------|---------------------------------------------------------------------------------------------------------------------------------------------------------------------------------------------------------------------|--|--------|--------|------------|------|----|----|--------|
| <b>SAT1</b>       | Diamine acetyltransferase 1 (EC 2.3.1.57) (Spermidine/spermine N(1)-acetyltransferase 1) (SSAT) (SSAT-1) (Putrescine acetyltransferase) (Polyamine N-acetyltransferase 1).<br>[Source:Uniprot/SWISSPROT;Acc:P21673] |  | 16.404 | -21.7  | 0.036402   | 257  | 13 | 1  | 48 [+] |
| <b>SCHIP1</b>     | Schwannomin interacting protein 1<br>[Source:RefSeq_peptide;Acc:NP_055390]                                                                                                                                          |  | 15.832 | -12.06 | 0.00231143 | 1000 | 19 | 8  | 32 [+] |
| <b>SCN8A</b>      | Sodium channel protein type 8 subunit alpha (Sodium channel protein type VIII subunit alpha) (Voltage-gated sodium channel subunit alpha Nav1.6).<br>[Source:Uniprot/SWISSPROT;Acc:Q9UQD0]                          |  | 17.422 | -8.63  | 0.000109   | 270  | 13 | 1  | 40 [+] |
| <b>SCUBE2</b>     | Signal peptide, CUB and EGF-like domain-containing protein 2 precursor (Protein CEGP1).<br>[Source:Uniprot/SWISSPROT;Acc:Q9NQ36]                                                                                    |  | 15.404 | -16.58 | 0.00066391 | 657  | 25 | 6  | 45 [+] |
| <b>SELK_HUMAN</b> | Selenoprotein K.<br>[Source:Uniprot/SWISSPROT;Acc:Q9Y6D0]                                                                                                                                                           |  | 16.813 | -14.74 | 0.00016487 | 367  | 18 | 7  | 46 [+] |
| <b>SEMA3A</b>     | Semaphorin-3A precursor (Semaphorin III) (Sema III).<br>[Source:Uniprot/SWISSPROT;Acc:Q14563]                                                                                                                       |  | 16.517 | -17.04 | 0.00182679 | 197  | 10 | 10 | 30 [+] |



|               |                                                                                                                                                                |        |        |           |      |    |   |        |
|---------------|----------------------------------------------------------------------------------------------------------------------------------------------------------------|--------|--------|-----------|------|----|---|--------|
| <b>SEMA3B</b> | Semaphorin-3B precursor (Semaphorin V) (Sema V) (Sema A(V)).<br>[Source:Uniprot/SWISSPROT;Acc:Q13214]                                                          | 16.619 | -10.59 | 7.68E-06  | 433  | 17 | 8 | 46 [+] |
| <b>SEMA4C</b> | Semaphorin-4C precursor.<br>[Source:Uniprot/SWISSPROT;Acc:Q9C0C4]                                                                                              | 16.388 | -16.64 | 0.0122596 | 884  | 25 | 9 | 39 [+] |
| <b>SEMG1</b>  | Semenogelin-1 precursor (Semenogelin I) (SGI) [Contains: Alpha- inhibin-92; Alpha-inhibin-31; Seminal basic protein].<br>[Source:Uniprot/SWISSPROT;Acc:P04279] | 16.444 | -17.01 | 0.0344693 | 1000 | 13 | 1 | 13 [+] |
| <b>SETX</b>   | Probable helicase senataxin (EC 3.6.1.-) (SEN1 homolog).<br>[Source:Uniprot/SWISSPROT;Acc:Q7Z333]                                                              | 17.274 | -14.96 | 4.36E-05  | 343  | 18 | 4 | 53 [+] |
| <b>SFRS5</b>  | Splicing factor, arginine/serine-rich 5 (Pre-mRNA-splicing factor SRP40) (Delayed-early protein HRS).<br>[Source:Uniprot/SWISSPROT;Acc:Q13243]                 | 15.65  | -16.55 | 7.43E-05  | 543  | 19 | 9 | 42 [+] |
| <b>SFT2D1</b> | Vesicle transport protein SFT2A (SFT2 domain-containing protein 1) (pRGR1).<br>[Source:Uniprot/SWISSPROT;Acc:Q8WV19]                                           | 16.599 | -16.05 | 0.0303512 | 481  | 19 | 4 | 48 [+] |
| <b>SGCE</b>   | Epsilon-sarcoglycan precursor (Epsilon-SG).<br>[Source:Uniprot/SWISSPROT;Acc:O43556]                                                                           | 15.725 | -15.9  | 0.0002208 | 267  | 15 | 6 | 63 [+] |

|                |                                                                                                                                                                                                                                                                                          |  |        |        |            |      |    |   |        |
|----------------|------------------------------------------------------------------------------------------------------------------------------------------------------------------------------------------------------------------------------------------------------------------------------------------|--|--------|--------|------------|------|----|---|--------|
| <b>SHANK1</b>  | Synaptotagmin-3 (Synaptotagmin III) (SytIII).<br>[Source:Uniprot/SWISSPROT;Acc:Q9BQG1]                                                                                                                                                                                                   |  | 16.449 | -18.84 | 0.034892   | 506  | 16 | 1 | 21 [+] |
| <b>SIPA1L1</b> | Signal-induced proliferation-associated 1-like protein 1 (High-risk human papilloma viruses E6 oncoproteins targeted protein 1) (E6-targeted protein 1).<br>[Source:Uniprot/SWISSPROT;Acc:O43166]                                                                                        |  | 15.499 | -17.85 | 0.00023244 | 240  | 9  | 6 | 29 [+] |
| <b>SIPA1L2</b> | Signal-induced proliferation-associated 1-like protein 2.<br>[Source:Uniprot/SWISSPROT;Acc:Q9P2F8]                                                                                                                                                                                       |  | 16.469 | -18.82 | 0.00336129 | 417  | 20 | 1 | 44 [+] |
| <b>SKP1A</b>   | S-phase kinase-associated protein 1A (Cyclin A/CDK2-associated protein p19) (p19A) (p19skp1) (RNA polymerase II elongation factor-like protein) (Organ of Corti protein 2) (OCP-II protein) (OCP-2) (Transcription elongation factor B) (SIII).<br>[Source:Uniprot/SWISSPROT;Acc:P63208] |  | 16.728 | -18.44 | 0.0265317  | 1000 | 15 | 8 | 27 [+] |
| <b>SLAIN1</b>  | SLAIN motif family, member 1 B<br>[Source:RefSeq_peptide;Acc:NP_653196]                                                                                                                                                                                                                  |  | 15.703 | -22.59 | 0.00011347 | 1000 | 18 | 7 | 26 [+] |
| <b>SLAIN1</b>  | SLAIN motif family, member 1 B<br>[Source:RefSeq_peptide;Acc:NP_653196]                                                                                                                                                                                                                  |  | 15.691 | -22.59 | 0.00236702 | 1007 | 11 | 1 | 13 [+] |

|                 |                                                                                                                                                                                                                                      |  |        |        |            |      |    |   |        |
|-----------------|--------------------------------------------------------------------------------------------------------------------------------------------------------------------------------------------------------------------------------------|--|--------|--------|------------|------|----|---|--------|
| <b>SLC10A7</b>  | Sodium/bile acid cotransporter 7 (Na(+)/bile acid cotransporter 7) (Solute carrier family 10 member 7). [Source:Uniprot/SWISSPROT;Acc:Q0GE19]                                                                                        |  | 15.596 | -18.45 | 1.29E-06   | 2080 | 10 | 5 | 10 [+] |
| <b>SLC12A3</b>  | Solute carrier family 12 member 3 (Thiazide-sensitive sodium-chloride cotransporter) (Na-Cl symporter). [Source:Uniprot/SWISSPROT;Acc:P55017]                                                                                        |  | 15.648 | -19.4  | 0.00659024 | 1000 | 12 | 5 | 17 [+] |
| <b>SLC22A7</b>  | Solute carrier family 22 member 7 isoform a [Source:RefSeq_peptide;Acc:NP_006663]                                                                                                                                                    |  | 16.404 | -15.93 | 0.036402   | 202  | 13 | 1 | 40 [+] |
| <b>SLC24A2</b>  | Sodium/potassium/calcium exchanger 2 precursor (Na(+)/K(+)/Ca(2+)- exchange protein 2) (Retinal cone Na-Ca+K exchanger) (Solute carrier family 24 member 2). [Source:Uniprot/SWISSPROT;Acc:Q9UI40]                                   |  | 16.291 | -20.42 | 0.039645   | 173  | 9  | 5 | 38 [+] |
| <b>SLC25A38</b> | Solute carrier family 25, member 38 [Source:RefSeq_peptide;Acc:NP_060345]                                                                                                                                                            |  | 15.697 | -14.39 | 3.10E-05   | 707  | 22 | 4 | 35 [+] |
| <b>SLC25A4</b>  | ADP/ATP translocase 1 (Adenine nucleotide translocator 1) (ANT 1) (ADP,ATP carrier protein 1) (Solute carrier family 25 member 4) (ADP,ATP carrier protein, heart/skeletal muscle isoform T1). [Source:Uniprot/SWISSPROT;Acc:P12235] |  | 16.63  | -12.22 | 0.00305312 | 299  | 15 | 7 | 50 [+] |

|                 |                                                                                                                                                       |  |        |        |            |      |    |   |        |
|-----------------|-------------------------------------------------------------------------------------------------------------------------------------------------------|--|--------|--------|------------|------|----|---|--------|
| <b>SLC26A11</b> | Solute carrier family 26, member 11<br>[Source:RefSeq_peptide;Acc:NP_775897]                                                                          |  | 16.233 | -23.62 | 0.00035854 | 780  | 19 | 4 | 33 [+] |
| <b>SLC35A1</b>  | Uncharacterized protein C6orf165.<br>[Source:Uniprot/SWISSPROT;Acc:Q8IYR0]                                                                            |  | 16.404 | -18.87 | 0.00130871 | 215  | 11 | 5 | 37 [+] |
| <b>SLC35B1</b>  | Solute carrier family 35 member B1<br>(UDP-galactose transporter-related protein 1) (UGTrel1) (hUGTrel1).<br>[Source:Uniprot/SWISSPROT;Acc:P78383]    |  | 16.543 | -16.37 | 0.0319799  | 480  | 15 | 7 | 32 [+] |
| <b>SLC35D2</b>  | Solute carrier family 35, member D2<br>[Source:RefSeq_peptide;Acc:NP_008932]                                                                          |  | 16.573 | -13.3  | 0.0310859  | 349  | 14 | 1 | 33 [+] |
| <b>SLC3A1</b>   | Neutral and basic amino acid transport protein rBAT (B(0,+)-type amino acid transport protein) (NBAT) (D2H).<br>[Source:Uniprot/SWISSPROT;Acc:Q07837] |  | 16.102 | -16.89 | 1.01E-06   | 855  | 20 | 5 | 27 [+] |
| <b>SLC3A1</b>   | Neutral and basic amino acid transport protein rBAT (B(0,+)-type amino acid transport protein) (NBAT) (D2H).<br>[Source:Uniprot/SWISSPROT;Acc:Q07837] |  | 17.988 | -16.89 | 0.00818827 | 182  | 8  | 1 | 32 [+] |
| <b>SLC6A2</b>   | Sodium-dependent noradrenaline transporter (Norepinephrine transporter) (NET).<br>[Source:Uniprot/SWISSPROT;Acc:P23975]                               |  | 16.031 | -18.18 | 2.33E-05   | 1000 | 17 | 4 | 22 [+] |

|                |                                                                                                                                                  |  |        |        |            |      |    |   |        |
|----------------|--------------------------------------------------------------------------------------------------------------------------------------------------|--|--------|--------|------------|------|----|---|--------|
| <b>SLITRK2</b> | SLIT and NTRK-like protein 2 precursor.<br>[Source:Uniprot/SWISSPROT;Acc:Q9H156]                                                                 |  | 16.378 | -20.65 | 0.00243659 | 877  | 22 | 5 | 32 [+] |
| <b>SLITRK2</b> | SLIT and NTRK-like protein 2 precursor.<br>[Source:Uniprot/SWISSPROT;Acc:Q9H156]                                                                 |  | 16.374 | -20.65 | 0.0374298  | 879  | 16 | 1 | 16 [+] |
| <b>SLMAP</b>   | Sarcolemmal membrane-associated protein (Sarcolemmal-associated protein).<br>[Source:Uniprot/SWISSPROT;Acc:Q14BN4]                               |  | 15.641 | -14.44 | 0.00437675 | 1060 | 12 | 1 | 12 [+] |
| <b>SMC1B</b>   | Structural maintenance of chromosomes protein 1B (SMC1beta protein).<br>[Source:Uniprot/SWISSPROT;Acc:Q8NDV3]                                    |  | 15.756 | -20.84 | 0.00060439 | 490  | 20 | 4 | 42 [+] |
| <b>SMC6</b>    | Structural maintenance of chromosomes protein 6 (hSMC6).<br>[Source:Uniprot/SWISSPROT;Acc:Q96SB8]                                                |  | 16.146 | -17.65 | 0.0452245  | 1685 | 4  | 1 | 3 [+]  |
| <b>SMC6</b>    | Structural maintenance of chromosomes protein 6 (hSMC6).<br>[Source:Uniprot/SWISSPROT;Acc:Q96SB8]                                                |  | 16.144 | -17.65 | 0.0453019  | 1687 | 6  | 4 | 5 [+]  |
| <b>SMPDL3A</b> | Acid sphingomyelinase-like phosphodiesterase 3a precursor (EC 3.1.4.-) (ASM-like phosphodiesterase 3a).<br>[Source:Uniprot/SWISSPROT;Acc:Q92484] |  | 17.535 | -18.77 | 0.00792385 | 312  | 16 | 5 | 49 [+] |

|               |                                                                                                                                                       |        |        |            |      |    |    |        |
|---------------|-------------------------------------------------------------------------------------------------------------------------------------------------------|--------|--------|------------|------|----|----|--------|
| <b>SNAP25</b> | Synaptosomal-associated protein 25 (SNAP-25) (Synaptosomal-associated 25 kDa protein) (Super protein) (SUP).<br>[Source:Uniprot/SWISSPROT;Acc:P60880] | 16.002 | -17.88 | 0.00419612 | 1220 | 19 | 8  | 30 [+] |
| <b>SNHG5</b>  | Small nucleolar RNA host gene (non-protein coding) 5 (SNHG5) on chromosome 6<br>[Source:RefSeq_dna;Acc:NR_003038]                                     | 17.083 | -13.68 | 0.00012329 | 277  | 15 | 1  | 41 [+] |
| <b>SNHG5</b>  | Small nucleolar RNA host gene (non-protein coding) 5 (SNHG5) on chromosome 6<br>[Source:RefSeq_dna;Acc:NR_003038]                                     | 17.029 | -25.33 | 0.00156837 | 355  | 17 | 1  | 45 [+] |
| <b>SNHG5</b>  | Small nucleolar RNA host gene (non-protein coding) 5 (SNHG5) on chromosome 6<br>[Source:RefSeq_dna;Acc:NR_003038]                                     | 16.769 | -13.68 | 0.00167117 | 354  | 17 | 1  | 34 [+] |
| <b>SNX11</b>  | Sorting nexin-11.<br>[Source:Uniprot/SWISSPROT;Acc:Q9Y5W9]                                                                                            | 15.311 | -20.2  | 0.00015362 | 1235 | 16 | 4  | 17 [+] |
| <b>SNX17</b>  | Sorting nexin-17.<br>[Source:Uniprot/SWISSPROT;Acc:Q15036]                                                                                            | 15.63  | -15.99 | 0.00024844 | 409  | 19 | 8  | 44 [+] |
| <b>SNX2</b>   | Sorting nexin-2 (Transformation-related gene 9 protein) (TRG-9).<br>[Source:Uniprot/SWISSPROT;Acc:O60749]                                             | 15.907 | -13.65 | 0.032      | 457  | 20 | 10 | 57 [+] |

|               |                                                                                                                                                                                           |        |        |            |      |    |    |        |
|---------------|-------------------------------------------------------------------------------------------------------------------------------------------------------------------------------------------|--------|--------|------------|------|----|----|--------|
| <b>SOAT2</b>  | Sterol O-acyltransferase 2 (EC 2.3.1.26) (Cholesterol acyltransferase 2) (Acyl coenzyme A:cholesterol acyltransferase 2) (ACAT-2).<br>[Source:Uniprot/SWISSPROT;Acc:O75908]               | 17.133 | -15.91 | 0.00163853 | 415  | 19 | 4  | 60 [+] |
| <b>SOD1</b>   | Superoxide dismutase [Cu-Zn] (EC 1.15.1.1).<br>[Source:Uniprot/SWISSPROT;Acc:P00441]                                                                                                      | 15.386 | -10.51 | 0.0007012  | 239  | 13 | 5  | 53 [+] |
| <b>SOS1</b>   | Son of sevenless homolog 1 (SOS-1).<br>[Source:Uniprot/SWISSPROT;Acc:Q07889]                                                                                                              | 15.365 | -13.77 | 0.00030095 | 1000 | 24 | 10 | 32 [+] |
| <b>SOX17</b>  | Transcription factor SOX-17.<br>[Source:Uniprot/SWISSPROT;Acc:Q9H6I2]                                                                                                                     | 17.54  | -12.7  | 0.00745079 | 376  | 17 | 6  | 52 [+] |
| <b>SP140</b>  | Nuclear body protein SP140 (Nuclear autoantigen Sp-140) (Speckled 140 kDa) (LYSp100 protein) (Lymphoid-restricted homolog of Sp100).<br>[Source:Uniprot/SWISSPROT;Acc:Q13342]             | 16.195 | -24.3  | 0.00060437 | 487  | 13 | 2  | 29 [+] |
| <b>SPATA4</b> | Spermatogenesis-associated protein 4 (Testis spermatocyte apoptosis-related gene 2 protein) (Testis and spermatogenesis cell-related protein 2).<br>[Source:Uniprot/SWISSPROT;Acc:Q8NEY3] | 17.422 | -18.6  | 0.00397441 | 206  | 11 | 4  | 37 [+] |

|              |                                                                                                                                                                              |  |        |        |            |     |    |   |        |
|--------------|------------------------------------------------------------------------------------------------------------------------------------------------------------------------------|--|--------|--------|------------|-----|----|---|--------|
| <b>SPG20</b> | Spartin (Trans-activated by hepatitis C virus core protein 1).<br>[Source:Uniprot/SWISSPROT;Acc:Q8N0X7]                                                                      |  | 16.422 | -15.58 | 0.0357982  | 617 | 18 | 1 | 19 [+] |
| <b>SPG21</b> | Maspardin (Spastic paraplegia 21 autosomal recessive Mast syndrome protein) (Acid cluster protein 33).<br>[Source:Uniprot/SWISSPROT;Acc:Q9NZD8]                              |  | 15.866 | -11.74 | 0.0021564  | 597 | 22 | 8 | 53 [+] |
| <b>SPP1</b>  | Osteopontin precursor (Bone sialoprotein-1) (Secreted phosphoprotein 1) (SPP-1) (Urinary stone protein) (Nephropontin) (Uropontin).<br>[Source:Uniprot/SWISSPROT;Acc:P10451] |  | 16.958 | -15.51 | 8.05E-05   | 430 | 19 | 7 | 39 [+] |
| <b>SPP1</b>  | Osteopontin precursor (Bone sialoprotein-1) (Secreted phosphoprotein 1) (SPP-1) (Urinary stone protein) (Nephropontin) (Uropontin).<br>[Source:Uniprot/SWISSPROT;Acc:P10451] |  | 16.615 | -15.51 | 0.00252092 | 520 | 17 | 1 | 21 [+] |
| <b>SPSB3</b> | SPRY domain-containing SOCS box protein 3 (SSB-3).<br>[Source:Uniprot/SWISSPROT;Acc:Q6PJ21]                                                                                  |  | 15.958 | -22.12 | 0.00189482 | 384 | 20 | 6 | 70 [+] |



|                   |                                                                                                                                                                                                   |  |        |        |            |     |    |   |        |
|-------------------|---------------------------------------------------------------------------------------------------------------------------------------------------------------------------------------------------|--|--------|--------|------------|-----|----|---|--------|
| <b>SRGN</b>       | Secretory granule proteoglycan core protein precursor (Platelet proteoglycan core protein) (P.PG) (Hematopoietic proteoglycan core protein) (Serglycin).<br>[Source:Uniprot/SWISSPROT;Acc:P10124] |  | 16.92  | -11.02 | 0.0182221  | 689 | 21 | 4 | 32 [+] |
| <b>SS18L2</b>     | SS18-like protein 2 (SYT homolog 2).<br>[Source:Uniprot/SWISSPROT;Acc:Q9UHA2]                                                                                                                     |  | 15.988 | -12.03 | 0.00281995 | 485 | 20 | 4 | 43 [+] |
| <b>SSB</b>        | Lupus La protein (Sjogren syndrome type B antigen) (SS-B) (La ribonucleoprotein) (La autoantigen).<br>[Source:Uniprot/SWISSPROT;Acc:P05455]                                                       |  | 17.309 | -10.02 | 0.0155574  | 285 | 17 | 6 | 60 [+] |
| <b>SSX1</b>       | Protein SSX1 (Synovial sarcoma, X breakpoint 1).<br>[Source:Uniprot/SWISSPROT;Acc:Q16384]                                                                                                         |  | 16.171 | -19.4  | 0.0452462  | 595 | 14 | 1 | 23 [+] |
| <b>SSX2</b>       | Protein SSX2 (Synovial sarcoma, X breakpoint 2) (SSX) (HOM-MEL-40).<br>[Source:Uniprot/SWISSPROT;Acc:Q16385]                                                                                      |  | 16.171 | -19.4  | 0.0452462  | 627 | 18 | 1 | 24 [+] |
| <b>SSX2_HUMAN</b> | Protein SSX2 (Synovial sarcoma, X breakpoint 2) (SSX) (HOM-MEL-40).<br>[Source:Uniprot/SWISSPROT;Acc:Q16385]                                                                                      |  | 16.171 | -19.4  | 0.0452462  | 631 | 18 | 1 | 24 [+] |

|                   |                                                                                                                                                                                                                                                                                                          |  |        |        |            |     |    |   |        |
|-------------------|----------------------------------------------------------------------------------------------------------------------------------------------------------------------------------------------------------------------------------------------------------------------------------------------------------|--|--------|--------|------------|-----|----|---|--------|
| <b>SSX3</b>       | Protein SSX3.<br>[Source:Uniprot/SWISSPROT;Acc:Q99909]                                                                                                                                                                                                                                                   |  | 16.701 | -19.4  | 0.0275817  | 414 | 23 | 1 | 53 [+] |
| <b>SSX3</b>       | Protein SSX3.<br>[Source:Uniprot/SWISSPROT;Acc:Q99909]                                                                                                                                                                                                                                                   |  | 16.174 | -19.4  | 0.0451177  | 612 | 18 | 1 | 29 [+] |
| <b>SSX5</b>       | Protein SSX5.<br>[Source:Uniprot/SWISSPROT;Acc:O60225]                                                                                                                                                                                                                                                   |  | 16.189 | -19.4  | 0.0444763  | 641 | 17 | 1 | 28 [+] |
| <b>SSX8</b>       | Protein SSX8.<br>[Source:Uniprot/SWISSPROT;Acc:Q7RTT4]                                                                                                                                                                                                                                                   |  | 16.171 | -19.4  | 0.0452462  | 595 | 17 | 1 | 26 [+] |
| <b>SSX9</b>       | Protein SSX9.<br>[Source:Uniprot/SWISSPROT;Acc:Q7RTT3]                                                                                                                                                                                                                                                   |  | 16.174 | -19.4  | 0.0451177  | 600 | 18 | 1 | 30 [+] |
| <b>ST3GAL4</b>    | CMP- <i>N</i> -acetylneuraminate- $\beta$ -galactosamide- $\alpha$ -2,3-sialyltransferase (EC 2.4.99.-) (Beta-galactoside alpha-2,3-sialyltransferase) (Alpha 2,3-sialyltransferase IV) (Alpha 2,3-ST) (Gal-NAc6S) (STZ) (SIAT4-C) (ST3Gal III) (SAT-3) (ST-4).<br>[Source:Uniprot/SWISSPROT;Acc:Q11206] |  | 16.857 | -13.03 | 0.00272659 | 219 | 12 | 3 | 37 [+] |
| <b>ST6GALNAC5</b> | $\alpha$ -N-acetylgalactosaminide alpha-2,6-sialyltransferase 5 (EC 2.4.99.-) (GalNAc alpha-2,6-sialyltransferase V) (ST6GalNAc V) (GD1 alpha synthase) (Sialyltransferase 7E).<br>[Source:Uniprot/SWISSPROT;Acc:Q9BVH7]                                                                                 |  | 15.424 | -10.3  | 0.00168214 | 828 | 16 | 4 | 24 [+] |

|               |                                                                                                                                                                                    |  |        |        |            |      |    |   |        |
|---------------|------------------------------------------------------------------------------------------------------------------------------------------------------------------------------------|--|--------|--------|------------|------|----|---|--------|
| <b>STAG2</b>  | Cohesin subunit SA-2 (Stromal antigen 2) (SCC3 homolog 2).<br>[Source:Uniprot/SWISSPROT;Acc:Q8N3U4]                                                                                |  | 16.047 | -9.85  | 0.00433751 | 1000 | 9  | 1 | 8 [+]  |
| <b>STK32C</b> | Serine/threonine-protein kinase 32C (EC 2.7.11.1) (PKE) (YANK3).<br>[Source:Uniprot/SWISSPROT;Acc:Q86UX6]                                                                          |  | 16.089 | -13.7  | 0.0109064  | 518  | 19 | 4 | 40 [+] |
| <b>STX11</b>  | Syntaxin-11.<br>[Source:Uniprot/SWISSPROT;Acc:O75558]                                                                                                                              |  | 15.533 | -19.39 | 0.00047755 | 879  | 13 | 2 | 16 [+] |
| <b>SYNPR</b>  | Synaptoporin.<br>[Source:Uniprot/SWISSPROT;Acc:Q8TBG9]                                                                                                                             |  | 16.056 | -14.01 | 4.88E-05   | 1439 | 10 | 6 | 12 [+] |
| <b>TADA1L</b> | SPT3-associated factor 42<br>[Source:RefSeq_peptide;Acc:NP_444281]                                                                                                                 |  | 15.943 | -17.03 | 4.89E-07   | 1057 | 15 | 8 | 22 [+] |
| <b>TADA3L</b> | Transcriptional adapter 3-like (ADA3-like protein) (ADA3 homolog) (hADA3).<br>[Source:Uniprot/SWISSPROT;Acc:O75528]                                                                |  | 16.374 | -15.71 | 0.00411696 | 497  | 22 | 5 | 49 [+] |
| <b>TAF13</b>  | Transcription initiation factor TFIID subunit 13 (Transcription initiation factor TFIID 18 kDa subunit) (TAF(II)18) (TAFII-18) (TAFII18).<br>[Source:Uniprot/SWISSPROT;Acc:Q15543] |  | 16.437 | -12.49 | 0.00098593 | 664  | 20 | 4 | 36 [+] |

|              |                                                                                                                                                                                                                                                                                |  |        |        |            |     |    |   |        |
|--------------|--------------------------------------------------------------------------------------------------------------------------------------------------------------------------------------------------------------------------------------------------------------------------------|--|--------|--------|------------|-----|----|---|--------|
| <b>TAF15</b> | TATA-binding protein-associated factor 2N (RNA-binding protein 56) (TAFII68) (TAF(II)68).<br>[Source:Uniprot/SWISSPROT;Acc:Q92804]                                                                                                                                             |  | 19.006 | -16.14 | 0.00311714 | 288 | 16 | 4 | 67 [+] |
| <b>TAF1A</b> | TATA box-binding protein-associated factor RNA polymerase I subunit A (TATA box-binding protein-associated factor 1A) (TBP-associated factor 1A) (TBP-associated factor RNA polymerase I 48 kDa) (TAFI48) (Transcription factor SL1).<br>[Source:Uniprot/SWISSPROT;Acc:Q15573] |  | 17.896 | -14.54 | 0.00171725 | 352 | 18 | 5 | 68 [+] |
| <b>TAF1A</b> | TATA box-binding protein-associated factor RNA polymerase I subunit A (TATA box-binding protein-associated factor 1A) (TBP-associated factor 1A) (TBP-associated factor RNA polymerase I 48 kDa) (TAFI48) (Transcription factor SL1).<br>[Source:Uniprot/SWISSPROT;Acc:Q15573] |  | 16.436 | -14.54 | 0.0353181  | 729 | 17 | 1 | 22 [+] |
| <b>TAF9</b>  | Adenylate kinase isoenzyme 6 (EC 2.7.4.3) (ATP-AMP transphosphorylase 6).<br>[Source:Uniprot/SWISSPROT;Acc:Q9Y3D8]                                                                                                                                                             |  | 16.857 | -10.87 | 0.00014476 | 199 | 10 | 4 | 40 [+] |

|                |                                                                                                                                                                                                                                                                            |  |        |        |            |      |    |   |        |
|----------------|----------------------------------------------------------------------------------------------------------------------------------------------------------------------------------------------------------------------------------------------------------------------------|--|--------|--------|------------|------|----|---|--------|
| <b>TAF9</b>    | Adenylate kinase isoenzyme 6 (EC 2.7.4.3) (ATP-AMP transphosphorylase 6).<br>[Source:Uniprot/SWISSPROT;Acc:Q9Y3D8]                                                                                                                                                         |  | 16.857 | -10.87 | 0.00014476 | 198  | 11 | 1 | 30 [+] |
| <b>TAP1</b>    | Antigen peptide transporter 1 (APT1) (Peptide transporter TAP1) (ATP-binding cassette sub-family B member 2) (Peptide transporter PSF1) (Peptide supply factor 1) (PSF-1) (Peptide transporter involved in antigen processing 1).<br>[Source:Uniprot/SWISSPROT;Acc:Q03518] |  | 15.518 | -12.26 | 0.00960175 | 530  | 24 | 5 | 60 [+] |
| <b>TARBP2</b>  | TAR RNA-binding protein 2 (Trans-activation-responsive RNA-binding protein).<br>[Source:Uniprot/SWISSPROT;Acc:Q15633]                                                                                                                                                      |  | 16.97  | -16.81 | 0.00406873 | 281  | 16 | 8 | 74 [+] |
| <b>TAS2R60</b> | Taste receptor type 2 member 60 (T2R60) (T2R56).<br>[Source:Uniprot/SWISSPROT;Acc:P59551]                                                                                                                                                                                  |  | 16.728 | -17.1  | 0.00539587 | 1000 | 20 | 3 | 25 [+] |
| <b>TBCD</b>    | Tubulin-specific chaperone D (Tubulin-folding cofactor D) (Beta-tubulin cofactor D) (tfcD) (SSD-1).<br>[Source:Uniprot/SWISSPROT;Acc:Q9BTW9]                                                                                                                               |  | 17.404 | -14.71 | 0.0142283  | 717  | 19 | 1 | 30 [+] |
| <b>TBCD</b>    | Tubulin-specific chaperone D (Tubulin-folding cofactor D) (Beta-tubulin cofactor D) (tfcD) (SSD-1).<br>[Source:Uniprot/SWISSPROT;Acc:Q9BTW9]                                                                                                                               |  | 16.827 | -14.71 | 0.0244905  | 1000 | 23 | 2 | 27 [+] |

|                   |                                                                                                                                                                                                                    |  |        |        |            |     |    |   |        |
|-------------------|--------------------------------------------------------------------------------------------------------------------------------------------------------------------------------------------------------------------|--|--------|--------|------------|-----|----|---|--------|
| <b>TBCK_HUMAN</b> | TBC domain-containing protein kinase-like protein.<br>[Source:Uniprot/SWISSPROT;Acc:Q8TEA7]                                                                                                                        |  | 15.981 | -10.74 | 0.00065887 | 487 | 20 | 2 | 29 [+] |
| <b>TBPL1</b>      | TATA box-binding protein-like protein 1 (TBP-like protein 1) (TATA box-binding protein-related factor 2) (TBP-related factor 2) (STUD protein) (21 kDa TBP-like protein).<br>[Source:Uniprot/SWISSPROT;Acc:P62380] |  | 15.797 | -9.56  | 7.54E-05   | 449 | 15 | 7 | 40 [+] |
| <b>TBXA2R</b>     | Thromboxane A2 receptor (TXA2-R) (Prostanoid TP receptor).<br>[Source:Uniprot/SWISSPROT;Acc:P21731]                                                                                                                |  | 17.875 | -13.84 | 0.00911416 | 169 | 9  | 1 | 21 [+] |
| <b>TBXAS1</b>     | Thromboxane-A synthase (EC 5.3.99.5) (TXA synthase) (TXS) (Cytochrome P450 5A1).<br>[Source:Uniprot/SWISSPROT;Acc:P24557]                                                                                          |  | 16.291 | -17.53 | 0.00884967 | 192 | 11 | 4 | 44 [+] |
| <b>TBXAS1</b>     | Thromboxane-A synthase (EC 5.3.99.5) (TXA synthase) (TXS) (Cytochrome P450 5A1).<br>[Source:Uniprot/SWISSPROT;Acc:P24557]                                                                                          |  | 16.291 | -17.53 | 0.0404523  | 251 | 12 | 1 | 43 [+] |
| <b>TCERG1</b>     | Transcription elongation regulator 1 (TATA box-binding protein-associated factor 2S) (Transcription factor CA150).<br>[Source:Uniprot/SWISSPROT;Acc:O14776]                                                        |  | 15.406 | -15.64 | 5.58E-05   | 865 | 18 | 8 | 38 [+] |

|              |                                                                                                                                                                                                  |        |        |            |     |    |   |        |
|--------------|--------------------------------------------------------------------------------------------------------------------------------------------------------------------------------------------------|--------|--------|------------|-----|----|---|--------|
| <b>TCF2</b>  | Hepatocyte nuclear factor 1-beta (HNF-1beta) (HNF-1B) (Variant hepatic nuclear factor 1) (VHNF1) (Homeoprotein LFB3) (Transcription factor 2) (TCF-2).<br>[Source:Uniprot/SWISSPROT;Acc:P35680]  | 16.431 | -15.94 | 0.0052979  | 940 | 15 | 7 | 23 [+] |
| <b>TEX14</b> | Testis-expressed protein 14 (Testis-expressed sequence 14) (Protein kinase-like protein SgK307) (Sugen kinase 307).<br>[Source:Uniprot/SWISSPROT;Acc:Q8IWB6]                                     | 16.599 | -20.52 | 0.0303383  | 324 | 20 | 4 | 82 [+] |
| <b>TEX14</b> | Testis-expressed protein 14 (Testis-expressed sequence 14) (Protein kinase-like protein SgK307) (Sugen kinase 307).<br>[Source:Uniprot/SWISSPROT;Acc:Q8IWB6]                                     | 16.565 | -20.52 | 0.0313222  | 330 | 17 | 1 | 54 [+] |
| <b>TGDS</b>  | dTDP-D-glucose 4,6-dehydratase (EC 4.2.1.46).<br>[Source:Uniprot/SWISSPROT;Acc:O95455]                                                                                                           | 15.463 | -19.4  | 0.00683835 | 725 | 20 | 9 | 35 [+] |
| <b>TGFBI</b> | Transforming growth factor-beta-induced protein ig-h3 precursor (Beta ig-h3) (Kerato-epithelin) (RGD-containing collagen-associated protein) (RGD-CAP).<br>[Source:Uniprot/SWISSPROT;Acc:Q15582] | 18.004 | -18.69 | 0.00012959 | 439 | 24 | 7 | 55 [+] |

|                 |                                                                                                                                                                     |  |        |        |            |      |    |   |        |
|-----------------|---------------------------------------------------------------------------------------------------------------------------------------------------------------------|--|--------|--------|------------|------|----|---|--------|
| <b>TGFBRAP1</b> | TGF beta receptor associated protein - 1<br>[Source:RefSeq_peptide;Acc:NP_004248]                                                                                   |  | 17.309 | -17.78 | 6.05E-06   | 298  | 17 | 6 | 73 [+] |
| <b>TGIF2</b>    | Homeobox protein TGIF2 (5'-TG-3'-interacting factor 2) (TGFB-induced factor 2) (TGF(beta)-induced transcription factor 2).<br>[Source:Uniprot/SWISSPROT;Acc:Q9GZN2] |  | 15.818 | -25.62 | 0.0007524  | 2519 | 10 | 5 | 10 [+] |
| <b>THBS4</b>    | Thrombospondin-4 precursor.<br>[Source:Uniprot/SWISSPROT;Acc:P35443]                                                                                                |  | 15.838 | -12.19 | 1.55E-06   | 141  | 9  | 6 | 26 [+] |
| <b>THOC7</b>    | Ngg1 interacting factor 3 like 1 binding protein 1<br>[Source:RefSeq_peptide;Acc:NP_079351]                                                                         |  | 16.178 | -11.29 | 0.0439477  | 261  | 13 | 4 | 46 [+] |
| <b>TIMELESS</b> | Timeless homolog (hTIM).<br>[Source:Uniprot/SWISSPROT;Acc:Q9UNS1]                                                                                                   |  | 15.553 | -13.58 | 0.0081201  | 590  | 24 | 4 | 47 [+] |
| <b>TIMM17A</b>  | Mitochondrial import inner membrane translocase subunit Tim17-A (Inner membrane preprotein translocase Tim17a).<br>[Source:Uniprot/SWISSPROT;Acc:Q99595]            |  | 15.673 | -11.89 | 0.00033512 | 1107 | 21 | 3 | 27 [+] |
| <b>TJP2</b>     | Tight junction protein ZO-2 (Zonula occludens 2 protein) (Zona occludens 2 protein) (Tight junction protein 2).<br>[Source:Uniprot/SWISSPROT;Acc:Q9UDY2]            |  | 16.557 | -18.3  | 0.0310604  | 664  | 15 | 1 | 22 [+] |



|                |                                                                                                                                                   |  |        |        |            |     |    |   |        |
|----------------|---------------------------------------------------------------------------------------------------------------------------------------------------|--|--------|--------|------------|-----|----|---|--------|
| <b>TLE4</b>    | Transducin-like enhancer protein 4.<br>[Source:Uniprot/SWISSPROT;Acc:Q04727]                                                                      |  | 16.63  | -18.26 | 0.0294592  | 202 | 9  | 1 | 43 [+] |
| <b>TLR1</b>    | Toll-like receptor 1 precursor (Toll/interleukin-1 receptor-like protein) (TIL) (CD281 antigen).<br>[Source:Uniprot/SWISSPROT;Acc:Q15399]         |  | 15.612 | -11.14 | 0.00551568 | 212 | 11 | 4 | 43 [+] |
| <b>TM4SF19</b> | Transmembrane 4 L6 family member 19.<br>[Source:Uniprot/SWISSPROT;Acc:Q96DZ7]                                                                     |  | 16.065 | -18.16 | 0.048693   | 219 | 11 | 3 | 41 [+] |
| <b>TMCO3</b>   | Transmembrane and coiled-coil domain-containing protein 3 precursor (Putative LAG1-interacting protein).<br>[Source:Uniprot/SWISSPROT;Acc:Q6UWJ1] |  | 18.44  | -21.15 | 0.00041725 | 653 | 20 | 6 | 35 [+] |
| <b>TMCO3</b>   | Transmembrane and coiled-coil domain-containing protein 3 precursor (Putative LAG1-interacting protein).<br>[Source:Uniprot/SWISSPROT;Acc:Q6UWJ1] |  | 18.697 | -21.15 | 0.00418194 | 574 | 15 | 1 | 26 [+] |
| <b>TMCO3</b>   | Transmembrane and coiled-coil domain-containing protein 3 precursor (Putative LAG1-interacting protein).<br>[Source:Uniprot/SWISSPROT;Acc:Q6UWJ1] |  | 18.33  | -21.15 | 0.00591893 | 691 | 14 | 1 | 17 [+] |

|                 |                                                                                                                                             |        |        |            |      |    |   |        |
|-----------------|---------------------------------------------------------------------------------------------------------------------------------------------|--------|--------|------------|------|----|---|--------|
| <b>TMCO4</b>    | Transmembrane and coiled-coil domains 4<br>[Source:RefSeq_peptide;Acc:NP_859070]                                                            | 16.046 | -17.42 | 0.00224345 | 389  | 17 | 1 | 35 [+] |
| <b>TMED4</b>    | Transmembrane emp24 domain-containing protein 4 precursor.<br>[Source:Uniprot/SWISSPROT;Acc:Q7Z7H5]                                         | 15.523 | -17.98 | 3.74E-07   | 1582 | 8  | 6 | 9 [+]  |
| <b>TMED8</b>    | Protein TMED8.<br>[Source:Uniprot/SWISSPROT;Acc:Q6PL24]                                                                                     | 15.32  | -24.24 | 1.25E-07   | 2525 | 2  | 2 | 3 [+]  |
| <b>TMEM131</b>  | Transmembrane protein 131 (Protein RW1) (Fragment).<br>[Source:Uniprot/SWISSPROT;Acc:Q92545]                                                | 16.586 | -18.7  | 0.00069584 | 759  | 23 | 8 | 30 [+] |
| <b>TMEM142A</b> | Calcium release-activated calcium channel protein 1 (Transmembrane protein 142A) (Protein orai-1).<br>[Source:Uniprot/SWISSPROT;Acc:Q96D31] | 17.364 | -25.6  | 0.00474675 | 389  | 21 | 6 | 74 [+] |
| <b>TMEM173</b>  | Transmembrane protein 173.<br>[Source:Uniprot/SWISSPROT;Acc:Q86WV6]                                                                         | 15.939 | -17.75 | 0.00075243 | 727  | 17 | 4 | 30 [+] |
| <b>TMEM18</b>   | Transmembrane protein 18.<br>[Source:Uniprot/SWISSPROT;Acc:Q96B42]                                                                          | 15.595 | -16.76 | 0.00013669 | 1605 | 8  | 3 | 8 [+]  |
| <b>TMEM22</b>   | Transmembrane protein 22.<br>[Source:Uniprot/SWISSPROT;Acc:Q8TBE7]                                                                          | 16.517 | -10.39 | 8.21E-05   | 183  | 9  | 8 | 38 [+] |
| <b>TMEM64</b>   | Transmembrane protein 64<br>[Source:RefSeq_peptide;Acc:NP_001008495]                                                                        | 15.485 | -10.83 | 1.65E-08   | 1000 | 17 | 7 | 16 [+] |

|                    |                                                                                                                                                                                |  |        |        |            |     |    |   |        |
|--------------------|--------------------------------------------------------------------------------------------------------------------------------------------------------------------------------|--|--------|--------|------------|-----|----|---|--------|
| <b>TMM29_HUMAN</b> | Transmembrane protein 29.<br>[Source:Uniprot/SWISSPROT;Acc:Q8NDB6]                                                                                                             |  | 16.178 | -24.37 | 0.0449427  | 195 | 10 | 1 | 27 [+] |
| <b>TNFAIP6</b>     | Tumor necrosis factor-inducible protein TSG-6 precursor (TNF-stimulated gene 6 protein) (Hyaluronate-binding protein).<br>[Source:Uniprot/SWISSPROT;Acc:P98066]                |  | 15.971 | -13.58 | 0.00281902 | 510 | 20 | 7 | 54 [+] |
| <b>TNFRSF11B</b>   | Tumor necrosis factor receptor superfamily member 11B precursor (Osteoprotegerin) (Osteoclastogenesis inhibitory factor).<br>[Source:Uniprot/SWISSPROT;Acc:O00300]             |  | 15.471 | -13.06 | 0.00093983 | 816 | 17 | 4 | 21 [+] |
| <b>TOM1L1</b>      | TOM1-like protein 1 (Target of Myb-like protein 1) (Src-activating and signaling molecule protein).<br>[Source:Uniprot/SWISSPROT;Acc:O75674]                                   |  | 16.273 | -12.15 | 0.00182172 | 716 | 21 | 4 | 28 [+] |
| <b>TOMM70A</b>     | Mitochondrial precursor proteins import receptor (Translocase of outer membrane TOM70).<br>[Source:Uniprot/SWISSPROT;Acc:O94826]                                               |  | 17.535 | -20.11 | 0.00017871 | 267 | 16 | 7 | 90 [+] |
| <b>TOPBP1</b>      | DNA topoisomerase 2-binding protein 1 (DNA topoisomerase II-binding protein 1) (DNA topoisomerase IIbeta-binding protein 1) (TopBP1).<br>[Source:Uniprot/SWISSPROT;Acc:Q92547] |  | 16.245 | -14.29 | 0.021731   | 644 | 18 | 6 | 29 [+] |

|                |                                                                                                                                                                                                                                     |  |        |        |            |      |    |   |        |
|----------------|-------------------------------------------------------------------------------------------------------------------------------------------------------------------------------------------------------------------------------------|--|--------|--------|------------|------|----|---|--------|
| <b>TP53BP2</b> | Apoptosis-stimulating of p53 protein 2 (Tumor suppressor p53-binding protein 2) (p53-binding protein 2) (p53BP2) (53BP2) (Bcl2-binding protein) (Bbp) (Renal carcinoma antigen NY-REN-51).<br>[Source:Uniprot/SWISSPROT;Acc:Q13625] |  | 16.165 | -22.77 | 0.044452   | 764  | 15 | 1 | 21 [+] |
| <b>TPM1</b>    | Tropomyosin-1 alpha chain (Alpha-tropomyosin).<br>[Source:Uniprot/SWISSPROT;Acc:P09493]                                                                                                                                             |  | 17.422 | -18.98 | 0.0139816  | 241  | 14 | 1 | 47 [+] |
| <b>TPRX1</b>   | Tetra-peptide repeat homeobox<br>[Source:RefSeq_peptide;Acc:NP_940881]                                                                                                                                                              |  | 15.937 | -9.88  | 0.00451401 | 532  | 19 | 2 | 32 [+] |
| <b>TPT1</b>    | Translationally-controlled tumor protein (TCTP) (p23) (Histamine-releasing factor) (HRF) (Fortilin).<br>[Source:Uniprot/SWISSPROT;Acc:P13693]                                                                                       |  | 16.004 | -16.64 | 0.00331373 | 424  | 14 | 1 | 32 [+] |
| <b>TRAIP</b>   | TRAF-interacting protein (RING finger protein 206).<br>[Source:Uniprot/SWISSPROT;Acc:Q9BWF2]                                                                                                                                        |  | 15.666 | -13.79 | 0.00646316 | 508  | 16 | 4 | 34 [+] |
| <b>TRAPPC3</b> | Trafficking protein particle complex subunit 3 (BET3 homolog).<br>[Source:Uniprot/SWISSPROT;Acc:O43617]                                                                                                                             |  | 15.952 | -15.83 | 0.00406873 | 258  | 12 | 1 | 35 [+] |
| <b>TRBV3-1</b> | T-cell receptor beta V gene segment<br>[Source:IMGT/GENE_DB;Acc:TRBV3-1]                                                                                                                                                            |  | 16.728 | -21.98 | 0.02689    | 1000 | 13 | 2 | 15 [+] |

|               |                                                                                                                                                                         |  |        |        |            |      |    |   |        |
|---------------|-------------------------------------------------------------------------------------------------------------------------------------------------------------------------|--|--------|--------|------------|------|----|---|--------|
| <b>TRIM3</b>  | Tripartite motif-containing protein 3 (RING finger protein 22) (Brain-expressed RING finger protein) (RING finger protein 97).<br>[Source:Uniprot/SWISSPROT;Acc:O75382] |  | 18.353 | -22.65 | 0.00037469 | 411  | 21 | 7 | 75 [+] |
| <b>TRIM3</b>  | Tripartite motif-containing protein 3 (RING finger protein 22) (Brain-expressed RING finger protein) (RING finger protein 97).<br>[Source:Uniprot/SWISSPROT;Acc:O75382] |  | 16.728 | -22.65 | 0.0265317  | 1000 | 15 | 1 | 16 [+] |
| <b>TRIM71</b> | Tripartite motif-containing protein 71 (Lin-41 homolog).<br>[Source:Uniprot/SWISSPROT;Acc:Q2Q1W2]                                                                       |  | 15.319 | -12.03 | 0.00010551 | 1000 | 20 | 7 | 32 [+] |
| <b>TRIML1</b> | Tripartite motif family-like protein 1 (RING finger protein 209).<br>[Source:Uniprot/SWISSPROT;Acc:Q8N9V2]                                                              |  | 15.499 | -21.11 | 0.00110806 | 123  | 7  | 3 | 25 [+] |
| <b>TRIP4</b>  | Activating signal cointegrator 1 (ASC1) (Thyroid receptor-interacting protein 4) (TRIP-4).<br>[Source:Uniprot/SWISSPROT;Acc:Q15650]                                     |  | 16.065 | -13.52 | 0.00486711 | 214  | 14 | 8 | 37 [+] |
| <b>TSG101</b> | Tumor susceptibility gene 101 protein.<br>[Source:Uniprot/SWISSPROT;Acc:Q99816]                                                                                         |  | 17.988 | -14.04 | 0.00768944 | 231  | 14 | 6 | 71 [+] |
| <b>TSGA10</b> | Testis specific, 10<br>[Source:RefSeq_peptide;Acc:NP_079520]                                                                                                            |  | 15.916 | -17.74 | 0.00221209 | 319  | 15 | 5 | 48 [+] |

|               |                                                                                                                                                                                  |        |        |            |     |    |   |        |
|---------------|----------------------------------------------------------------------------------------------------------------------------------------------------------------------------------|--------|--------|------------|-----|----|---|--------|
| <b>TSPAN8</b> | Tetraspanin-8 (Tspan-8)<br>(Transmembrane 4 superfamily member 3) (Tumor- associated antigen CO-029).<br>[Source:Uniprot/SWISSPROT;Acc:P19075]                                   | 15.838 | -9.9   | 0.00275001 | 237 | 14 | 6 | 44 [+] |
| <b>TSSC1</b>  | Protein TSSC1 (Tumor-suppressing subchromosomal transferable fragment candidate gene 1 protein) (Tumor-suppressing STF cDNA 1 protein).<br>[Source:Uniprot/SWISSPROT;Acc:Q53HC9] | 15.441 | -11.36 | 0.00414428 | 353 | 15 | 1 | 54 [+] |
| <b>TSSC1</b>  | Protein TSSC1 (Tumor-suppressing subchromosomal transferable fragment candidate gene 1 protein) (Tumor-suppressing STF cDNA 1 protein).<br>[Source:Uniprot/SWISSPROT;Acc:Q53HC9] | 15.365 | -11.36 | 0.00421738 | 369 | 16 | 8 | 65 [+] |
| <b>TTC18</b>  | Tetratricopeptide repeat domain 18<br>[Source:RefSeq_peptide;Acc:NP_660153]                                                                                                      | 17.083 | -22.16 | 9.17E-05   | 213 | 11 | 6 | 47 [+] |
| <b>TTC18</b>  | Tetratricopeptide repeat domain 18<br>[Source:RefSeq_peptide;Acc:NP_660153]                                                                                                      | 17.083 | -22.16 | 0.0192564  | 209 | 10 | 1 | 33 [+] |
| <b>TTC21B</b> | Tetratricopeptide repeat domain 21B<br>[Source:RefSeq_peptide;Acc:NP_079029]                                                                                                     | 16.883 | -15.2  | 0.0232421  | 423 | 20 | 4 | 53 [+] |

|                   |                                                                                                                                    |  |        |        |            |     |    |   |        |
|-------------------|------------------------------------------------------------------------------------------------------------------------------------|--|--------|--------|------------|-----|----|---|--------|
| <b>TTC32</b>      | Tetratricopeptide repeat protein 32 (TPR repeat protein 32).<br>[Source:Uniprot/SWISSPROT;Acc:Q5I0X7]                              |  | 15.838 | -14.83 | 0.00128912 | 228 | 12 | 6 | 38 [+] |
| <b>TTF1</b>       | Transcription termination factor 1 (TTF-1) (TTF-I) (RNA polymerase I termination factor).<br>[Source:Uniprot/SWISSPROT;Acc:Q15361] |  | 16.37  | -9.94  | 0.0375729  | 367 | 19 | 3 | 58 [+] |
| <b>TTLL11</b>     | Tubulin--tyrosine ligase-like protein 11.<br>[Source:Uniprot/SWISSPROT;Acc:Q8NHH1]                                                 |  | 15.386 | -16.22 | 0.00789276 | 207 | 12 | 3 | 56 [+] |
| <b>TUBAL3</b>     | Tubulin, $\alpha$ -like 3<br>[Source:RefSeq_peptide;Acc:NP_079079]                                                                 |  | 15.807 | -11.58 | 0.00163901 | 419 | 21 | 5 | 56 [+] |
| <b>TUBB6</b>      | Tubulin $\beta$ -6 chain.<br>[Source:Uniprot/SWISSPROT;Acc:Q9BUF5]                                                                 |  | 15.685 | -13.32 | 0.00782593 | 422 | 16 | 5 | 35 [+] |
| <b>TUSC3</b>      | Tumor suppressor candidate 3 (Protein N33).<br>[Source:Uniprot/SWISSPROT;Acc:Q13454]                                               |  | 16.766 | -10.54 | 0.00061759 | 334 | 17 | 5 | 58 [+] |
| <b>TUSC3</b>      | Tumor suppressor candidate 3 (Protein N33).<br>[Source:Uniprot/SWISSPROT;Acc:Q13454]                                               |  | 16.31  | -10.54 | 0.0389693  | 429 | 16 | 1 | 39 [+] |
| <b>TYBN_HUMAN</b> | NB thymosin beta (Thymosin-like protein 8).<br>[Source:Uniprot/SWISSPROT;Acc:Q99406]                                               |  | 16.782 | -14.98 | 0.0252292  | 396 | 13 | 1 | 34 [+] |

|                    |                                                                                                                                                                                                                         |  |        |        |            |      |    |   |        |
|--------------------|-------------------------------------------------------------------------------------------------------------------------------------------------------------------------------------------------------------------------|--|--------|--------|------------|------|----|---|--------|
| <b>U3045_HUMAN</b> | Protein UNQ3045/PRO9861 precursor.<br>[Source:Uniprot/SWISSPROT;Acc:Q6UWE3]                                                                                                                                             |  | 16.086 | -13.97 | 0.0434846  | 1000 | 22 | 3 | 33 [+] |
| <b>UBAC2</b>       | UBA domain-containing protein PHGDHL1 precursor.<br>[Source:Uniprot/SWISSPROT;Acc:Q8NBM4]                                                                                                                               |  | 17.83  | -14.14 | 0.00330366 | 363  | 19 | 1 | 49 [+] |
| <b>UCHL1</b>       | Ubiquitin carboxyl-terminal hydrolase isozyme L1 (EC 3.4.19.12) (EC 6.-.-.) (UCH-L1) (Ubiquitin thioesterase L1) (Neuron cytoplasmic protein 9.5) (PGP 9.5) (PGP9.5).<br>[Source:Uniprot/SWISSPROT;Acc:P09936]          |  | 15.427 | -9.64  | 0.00075255 | 356  | 17 | 7 | 74 [+] |
| <b>UCN2</b>        | Urocortin-2 precursor (Urocortin II) (Ucn II) (Stresscopin-related peptide) (Urocortin-related peptide).<br>[Source:Uniprot/SWISSPROT;Acc:Q96RP3]                                                                       |  | 16.622 | -24.5  | 0.0296932  | 1066 | 16 | 3 | 20 [+] |
| <b>UGCGL2</b>      | UDP-glucose:glycoprotein glucosyltransferase 2 precursor (EC 2.4.1.-) (UDP-glucose ceramide glucosyltransferase-like 1) (UDP--Glc:glycoprotein glucosyltransferase 2) (HUGT2).<br>[Source:Uniprot/SWISSPROT;Acc:Q9NYU1] |  | 16.178 | -9.75  | 0.0449427  | 210  | 12 | 5 | 38 [+] |



|              |                                                                                                                                                                                                                                          |        |        |            |      |    |   |        |
|--------------|------------------------------------------------------------------------------------------------------------------------------------------------------------------------------------------------------------------------------------------|--------|--------|------------|------|----|---|--------|
| <b>UGT8</b>  | 2-Hydroxyacylsphingosine 1-beta-galactosyltransferase precursor (EC 2.4.1.45) (UDP-galactose-ceramide galactosyltransferase) (Ceramide UDP-galactosyltransferase) (Cerebroside synthase).<br>[Source:Uniprot/SWISSPROT;Acc:Q16880]       | 16.961 | -20.29 | 0.00213274 | 1000 | 19 | 5 | 26 [+] |
| <b>UNC5A</b> | Netrin receptor UNC5A precursor (Unc-5 homolog A) (Unc-5 homolog 1).<br>[Source:Uniprot/SWISSPROT;Acc:Q6ZN44]                                                                                                                            | 15.319 | -21.67 | 0.00355622 | 1010 | 23 | 6 | 29 [+] |
| <b>UPB1</b>  | $\beta$ -Ureidopropionase (EC 3.5.1.6) (Beta-alanine synthase) (N-carbamoyl-beta-alanine amidohydrolase) (BUP-1).<br>[Source:Uniprot/SWISSPROT;Acc:Q9UBR1]                                                                               | 16.133 | -15.96 | 0.00106615 | 790  | 25 | 2 | 31 [+] |
| <b>UQCRH</b> | Ubiquinol-cytochrome c reductase complex 11 kDa protein, mitochondrial precursor (EC 1.10.2.2) (Mitochondrial hinge protein) (Cytochrome c1 nonheme 11 kDa protein) (Complex III subunit VIII).<br>[Source:Uniprot/SWISSPROT;Acc:P07919] | 18.214 | -12.56 | 0.00660821 | 192  | 9  | 4 | 31 [+] |

|              |                                                                                                                                                                                                                                          |  |        |        |            |      |    |   |        |
|--------------|------------------------------------------------------------------------------------------------------------------------------------------------------------------------------------------------------------------------------------------|--|--------|--------|------------|------|----|---|--------|
| <b>UQCRH</b> | Ubiquinol-cytochrome c reductase complex 11 kDa protein, mitochondrial precursor (EC 1.10.2.2) (Mitochondrial hinge protein) (Cytochrome c1 nonheme 11 kDa protein) (Complex III subunit VIII).<br>[Source:Uniprot/SWISSPROT;Acc:P07919] |  | 18.214 | -12.56 | 0.00660821 | 189  | 9  | 1 | 22 [+] |
| <b>USPL1</b> | Ubiquitin-specific peptidase-like protein 1.<br>[Source:Uniprot/SWISSPROT;Acc:Q5W0Q7]                                                                                                                                                    |  | 18.214 | -12.31 | 0.0006508  | 193  | 11 | 7 | 49 [+] |
| <b>VAPB</b>  | Vesicle-associated membrane protein-associated protein B/C (VAMP-associated protein B/C) (VAMP-B/VAMP-C) (VAP-B/VAP-C).<br>[Source:Uniprot/SWISSPROT;Acc:O95292]                                                                         |  | 15.46  | -22.14 | 0.00091202 | 2668 | 4  | 5 | 4 [+]  |
| <b>VAPB</b>  | Vesicle-associated membrane protein-associated protein B/C (VAMP-associated protein B/C) (VAMP-B/VAMP-C) (VAP-B/VAP-C).<br>[Source:Uniprot/SWISSPROT;Acc:O95292]                                                                         |  | 17.063 | -22.14 | 0.0196211  | 923  | 15 | 1 | 17 [+] |
| <b>VBP1</b>  | Prefoldin subunit 3 (Von Hippel-Lindau-binding protein 1) (VHL-binding protein 1) (VBP-1) (HIBBJ46).<br>[Source:Uniprot/SWISSPROT;Acc:P61758]                                                                                            |  | 16.188 | -15.59 | 0.00930473 | 974  | 19 | 3 | 24 [+] |

|              |                                                                                                                                                                |        |        |           |     |    |   |        |
|--------------|----------------------------------------------------------------------------------------------------------------------------------------------------------------|--------|--------|-----------|-----|----|---|--------|
| <b>VCAM1</b> | Vascular cell adhesion protein 1 precursor (V-CAM 1) (CD106 antigen) (INCAM-100).<br>[Source:Uniprot/SWISSPROT;Acc:P19320]                                     | 17.196 | -12.55 | 0.0173093 | 171 | 7  | 1 | 17 [+] |
| <b>VCAM1</b> | Vascular cell adhesion protein 1 precursor (V-CAM 1) (CD106 antigen) (INCAM-100).<br>[Source:Uniprot/SWISSPROT;Acc:P19320]                                     | 15.644 | -12.55 | 0.0223217 | 758 | 23 | 7 | 30 [+] |
| <b>VDAC2</b> | Voltage-dependent anion-selective channel protein 2 (VDAC-2) (hVDAC2) (Outer mitochondrial membrane protein porin 2).<br>[Source:Uniprot/SWISSPROT;Acc:P45880] | 17.179 | -13.39 | 0.0175887 | 340 | 17 | 1 | 48 [+] |
| <b>VDAC2</b> | Voltage-dependent anion-selective channel protein 2 (VDAC-2) (hVDAC2) (Outer mitochondrial membrane protein porin 2).<br>[Source:Uniprot/SWISSPROT;Acc:P45880] | 16.623 | -13.39 | 0.0296755 | 459 | 18 | 1 | 38 [+] |
| <b>VLDLR</b> | Very low-density lipoprotein receptor precursor (VLDL receptor) (VLDL-R).<br>[Source:Uniprot/SWISSPROT;Acc:P98155]                                             | 16.773 | -18.5  | 0.0257667 | 612 | 21 | 1 | 33 [+] |
| <b>VLDLR</b> | Very low-density lipoprotein receptor precursor (VLDL receptor) (VLDL-R).<br>[Source:Uniprot/SWISSPROT;Acc:P98155]                                             | 16.759 | -18.5  | 0.0261194 | 617 | 24 | 6 | 59 [+] |

|                   |                                                                                                                                                                              |        |        |           |      |    |   |        |
|-------------------|------------------------------------------------------------------------------------------------------------------------------------------------------------------------------|--------|--------|-----------|------|----|---|--------|
| <b>VNN2</b>       | Vascular non-inflammatory molecule 2 precursor (Vanin-2) (Glycosylphosphatidyl inositol-anchored protein GPI-80) (Protein FOAP- 4).<br>[Source:Uniprot/SWISSPROT;Acc:O95498] | 16.414 | -10.86 | 0.0148944 | 430  | 20 | 4 | 53 [+] |
| <b>VNN2</b>       | Vascular non-inflammatory molecule 2 precursor (Vanin-2) (Glycosylphosphatidyl inositol-anchored protein GPI-80) (Protein FOAP- 4).<br>[Source:Uniprot/SWISSPROT;Acc:O95498] | 16.522 | -10.86 | 0.0326061 | 405  | 18 | 1 | 47 [+] |
| <b>VPS33B</b>     | Vacuolar protein sorting-associated protein 33B (hVPS33B).<br>[Source:Uniprot/SWISSPROT;Acc:Q9H267]                                                                          | 16.404 | -10.67 | 0.036402  | 300  | 18 | 7 | 70 [+] |
| <b>VPS41</b>      | Vacuolar protein sorting-associated protein 41 homolog (S53).<br>[Source:Uniprot/SWISSPROT;Acc:P49754]                                                                       | 15.461 | -14.32 | 7.57E-05  | 2302 | 3  | 3 | 3 [+]  |
| <b>VRK3</b>       | Serine/threonine-protein kinase VRK3 (EC 2.7.11.1) (Vaccinia-related kinase 3).<br>[Source:Uniprot/SWISSPROT;Acc:Q8IV63]                                                     | 15.746 | -13.77 | 1.69E-05  | 327  | 18 | 5 | 74 [+] |
| <b>WBP7_HUMAN</b> | WW domain-binding protein 7 (Myeloid/lymphoid or mixed-lineage leukemia protein 4) (Trithorax homolog 2).<br>[Source:Uniprot/SWISSPROT;Acc:Q9UMN6]                           | 16.392 | -18.61 | 0.014966  | 321  | 19 | 7 | 70 [+] |

|               |                                                                                                                                                                                                                                      |  |        |        |            |      |    |   |        |
|---------------|--------------------------------------------------------------------------------------------------------------------------------------------------------------------------------------------------------------------------------------|--|--------|--------|------------|------|----|---|--------|
| <b>WDFY1</b>  | WD repeat and FYVE domain-containing protein 1 (WD40- and FYVE domain- containing protein 1) (Phosphoinositide-binding protein 1) (FENS-1) (Zinc finger FYVE domain-containing protein 17).<br>[Source:Uniprot/SWISSPROT;Acc:Q8IWB7] |  | 15.945 | -21.69 | 0.00899233 | 3323 | 2  | 2 | 3 [+]  |
| <b>WDFY2</b>  | WD repeat and FYVE domain-containing protein 2 (WD40- and FYVE domain- containing protein 2) (Zinc finger FYVE domain-containing protein 22).<br>[Source:Uniprot/SWISSPROT;Acc:Q96P53]                                               |  | 16.32  | -13.35 | 0.00149085 | 314  | 18 | 5 | 72 [+] |
| <b>WDR21A</b> | WD repeat protein 21A.<br>[Source:Uniprot/SWISSPROT;Acc:Q8WV16]                                                                                                                                                                      |  | 16.105 | -15.62 | 0.00384484 | 843  | 12 | 2 | 12 [+] |
| <b>WDR22</b>  | WD repeat protein 22 (Breakpoint cluster region protein 2) (BCRP2).<br>[Source:Uniprot/SWISSPROT;Acc:Q96JK2]                                                                                                                         |  | 16.865 | -17.1  | 0.00076771 | 1000 | 19 | 6 | 29 [+] |
| <b>WDR27</b>  | WD repeat domain 27<br>[Source:RefSeq_peptide;Acc:NP_872358]                                                                                                                                                                         |  | 16.371 | -18.86 | 4.02E-05   | 1000 | 20 | 2 | 26 [+] |
| <b>WDR45L</b> | WD repeat domain phosphoinositide-interacting protein 3 (WIPI-3) (WD repeat protein 45-like) (WDR45-like protein) (WIPI49-like protein).<br>[Source:Uniprot/SWISSPROT;Acc:Q5MNZ6]                                                    |  | 15.517 | -18.18 | 6.58E-06   | 1307 | 14 | 6 | 17 [+] |

|               |                                                                                                                                |        |        |            |      |    |   |        |
|---------------|--------------------------------------------------------------------------------------------------------------------------------|--------|--------|------------|------|----|---|--------|
| <b>WDR46</b>  | WD repeat domain 46 (WDR46), mRNA<br>[Source:RefSeq_dna;Acc:NM_005452]                                                         | 17.083 | -20.59 | 0.0192564  | 171  | 11 | 6 | 44 [+] |
| <b>WDR60</b>  | WD repeat protein 60.<br>[Source:Uniprot/SWISSPROT;Acc:Q8WVS4]                                                                 | 15.832 | -14.56 | 0.00114887 | 1000 | 20 | 3 | 23 [+] |
| <b>WDR71</b>  | WD repeat protein 71 (Protein G-16).<br>[Source:Uniprot/SWISSPROT;Acc:Q9BRP4]                                                  | 15.675 | -16.96 | 0.0499385  | 329  | 18 | 3 | 45 [+] |
| <b>WDSUB1</b> | WD repeat, SAM and U-box domain-containing protein 1.<br>[Source:Uniprot/SWISSPROT;Acc:Q8N9V3]                                 | 15.499 | -14.32 | 0.00018911 | 172  | 9  | 4 | 39 [+] |
| <b>WEE1</b>   | Wee1-like protein kinase (EC 2.7.10.2) (Wee1A kinase) (WEE1hu).<br>[Source:Uniprot/SWISSPROT;Acc:P30291]                       | 15.569 | -16.92 | 7.65E-06   | 1000 | 25 | 8 | 47 [+] |
| <b>WHDC1</b>  | WAS protein homology region 2 domain containing 1<br>[Source:RefSeq_peptide;Acc:NP_001073904]                                  | 15.448 | -12.68 | 3.62E-05   | 1323 | 17 | 4 | 22 [+] |
| <b>WHSC2</b>  | Negative elongation factor A (NELF-A) (Wolf-Hirschhorn syndrome candidate 2 protein).<br>[Source:Uniprot/SWISSPROT;Acc:Q9H3P2] | 17.951 | -16.95 | 0.00032169 | 596  | 26 | 5 | 55 [+] |

|                    |                                                                                                                                                                        |  |        |        |            |      |    |   |        |
|--------------------|------------------------------------------------------------------------------------------------------------------------------------------------------------------------|--|--------|--------|------------|------|----|---|--------|
| <b>WHSC2</b>       | Negative elongation factor A (NELF-A) (Wolf-Hirschhorn syndrome candidate 2 protein).<br>[Source:Uniprot/SWISSPROT;Acc:Q9H3P2]                                         |  | 19.346 | -16.95 | 0.0022582  | 300  | 17 | 1 | 58 [+] |
| <b>WIF1</b>        | Wnt inhibitory factor 1 precursor (WIF-1).<br>[Source:Uniprot/SWISSPROT;Acc:Q9Y5W5]                                                                                    |  | 16.805 | -21.39 | 2.06E-05   | 722  | 26 | 7 | 48 [+] |
| <b>WTAP</b>        | Wilms' tumor 1-associating protein (WT1-associated protein) (Putative pre-mRNA-splicing regulator female-lethal(2D) homolog).<br>[Source:Uniprot/SWISSPROT;Acc:Q15007] |  | 16.362 | -11.04 | 0.00223745 | 708  | 22 | 7 | 35 [+] |
| <b>XKR3</b>        | XK-related protein 3 (XTES).<br>[Source:Uniprot/SWISSPROT;Acc:Q5GH77]                                                                                                  |  | 16.97  | -10.62 | 0.0214202  | 187  | 8  | 1 | 22 [+] |
| <b>XKR9</b>        | XK-related protein 9.<br>[Source:Uniprot/SWISSPROT;Acc:Q5GH70]                                                                                                         |  | 15.631 | -15.83 | 0.00026707 | 1517 | 8  | 3 | 11 [+] |
| <b>XPO5</b>        | Exportin-5 (Exp5) (Ran-binding protein 21).<br>[Source:Uniprot/SWISSPROT;Acc:Q9HAV4]                                                                                   |  | 16.827 | -21.49 | 0.0244905  | 1000 | 10 | 1 | 11 [+] |
| <b>XR_015868.1</b> | Similar to ring finger protein 18 (LOC732387), mRNA<br>[Source:RefSeq_dna;Acc:XR_015868]                                                                               |  | 16.195 | -16.75 | 0.00275965 | 798  | 15 | 1 | 20 [+] |
| <b>XR_016028.1</b> | NOT ANNOTATED                                                                                                                                                          |  | 17.875 | -13.4  | 0.00911416 | 211  | 10 | 2 | 37 [+] |

|                    |                                                                                                 |  |        |        |            |      |    |   |        |
|--------------------|-------------------------------------------------------------------------------------------------|--|--------|--------|------------|------|----|---|--------|
| <b>XR_017847.1</b> | CDNA FLJ35816 fis, clone TESTI2006109.<br>[Source:Uniprot/SPTREMBL;Acc:Q8NA59]                  |  | 16.538 | -19.49 | 0.0316001  | 1367 | 6  | 1 | 6 [+]  |
| <b>XR_017859.1</b> | tMDC II (TMDCII), misc RNA<br>[Source:RefSeq_dna;Acc:XR_017859]                                 |  | 16.912 | -12.68 | 0.0226149  | 348  | 16 | 1 | 28 [+] |
| <b>XR_017872.1</b> | CDNA FLJ42102 fis, clone TESOP2006746.<br>[Source:Uniprot/SPTREMBL;Acc:Q6ZVU0]                  |  | 16.039 | -11.18 | 0.049827   | 501  | 20 | 1 | 45 [+] |
| <b>YIPF4</b>       | Protein YIPF4 (YIP1 family member 4).<br>[Source:Uniprot/SWISSPROT;Acc:Q9BSR8]                  |  | 15.766 | -10.82 | 0.0325111  | 960  | 16 | 6 | 27 [+] |
| <b>YIPF7</b>       | Yip1 domain family, member 7 (YIPF7), mRNA<br>[Source:RefSeq_dna;Acc:NM_182592]                 |  | 15.685 | -17.44 | 0.00065582 | 1000 | 18 | 2 | 22 [+] |
| <b>YN001_HUMAN</b> | Putative uncharacterized protein CS0DJ013YG01.<br>[Source:Uniprot/SWISSPROT;Acc:Q86SZ3]         |  | 17.823 | -18.18 | 0.00957263 | 1000 | 15 | 2 | 17 [+] |
| <b>YN002_HUMAN</b> | Putative uncharacterized protein CS0DE013YM09 homolog.<br>[Source:Uniprot/SWISSPROT;Acc:Q86TS7] |  | 15.633 | -10.55 | 0.0200474  | 1237 | 10 | 4 | 14 [+] |
| <b>YN003_HUMAN</b> | Uncharacterized protein FLJ30638.<br>[Source:Uniprot/SWISSPROT;Acc:Q96DQ3]                      |  | 17.026 | -16.19 | 0.01743    | 1000 | 13 | 2 | 14 [+] |
| <b>YPEL1</b>       | Protein yippee-like 1.<br>[Source:Uniprot/SWISSPROT;Acc:O60688]                                 |  | 16.404 | -10.61 | 0.00406873 | 263  | 15 | 4 | 49 [+] |



|                    |                                                                                                                                                                            |  |        |        |            |      |    |   |        |
|--------------------|----------------------------------------------------------------------------------------------------------------------------------------------------------------------------|--|--------|--------|------------|------|----|---|--------|
| <b>YV008_HUMAN</b> | Putative uncharacterized protein FLJ32756.<br>[Source:Uniprot/SWISSPROT;Acc:Q96M85]                                                                                        |  | 16.06  | -19.88 | 0.00298652 | 1000 | 10 | 1 | 10 [+] |
| <b>ZBP1</b>        | Z-DNA-binding protein 1 (Tumor stroma and activated macrophage protein DLM-1).<br>[Source:Uniprot/SWISSPROT;Acc:Q9H171]                                                    |  | 16.896 | -18.7  | 0.0229573  | 723  | 15 | 1 | 28 [+] |
| <b>ZBP1</b>        | Z-DNA-binding protein 1 (Tumor stroma and activated macrophage protein DLM-1).<br>[Source:Uniprot/SWISSPROT;Acc:Q9H171]                                                    |  | 16.886 | -18.7  | 0.0231822  | 727  | 15 | 1 | 28 [+] |
| <b>ZBTB17</b>      | Zinc finger and BTB domain-containing protein 17 (Zinc finger protein 151) (Myc-interacting zinc finger protein) (Miz-1 protein).<br>[Source:Uniprot/SWISSPROT;Acc:Q13105] |  | 17.922 | -21.09 | 0.00871561 | 458  | 19 | 1 | 42 [+] |
| <b>ZF36_HUMAN</b>  | Zinc finger protein ZFP-36 (Fragment).<br>[Source:Uniprot/SWISSPROT;Acc:P16415]                                                                                            |  | 15.742 | -12.38 | 0.0199973  | 435  | 18 | 3 | 41 [+] |
| <b>ZFAND6</b>      | AN1-type zinc finger protein 6 (Zinc finger A20 domain-containing protein 3) (Associated with PRK1 protein).<br>[Source:Uniprot/SWISSPROT;Acc:Q6FIF0]                      |  | 15.685 | -10.39 | 0.0133252  | 742  | 23 | 7 | 36 [+] |

|                |                                                                                                                                                                                                                 |        |        |            |      |    |   |        |
|----------------|-----------------------------------------------------------------------------------------------------------------------------------------------------------------------------------------------------------------|--------|--------|------------|------|----|---|--------|
| <b>ZFYVE26</b> | Zinc finger, FYVE domain containing 26<br>[Source:RefSeq_peptide;Acc:NP_056161]+B1058                                                                                                                           | 15.645 | -20.85 | 0.00890648 | 1915 | 12 | 4 | 15 [+] |
| <b>ZIC2</b>    | Zinc finger protein ZIC 2 (Zinc finger protein of the cerebellum 2).<br>[Source:Uniprot/SWISSPROT;Acc:O95409]                                                                                                   | 15.418 | -19.94 | 0.00631673 | 1082 | 14 | 7 | 19 [+] |
| <b>ZKSCAN3</b> | Zinc finger protein 306 (Zinc finger protein 47 homolog) (Zfp-47) (Zf47) (Zinc finger and SCAN domain-containing protein 13).<br>[Source:Uniprot/SWISSPROT;Acc:Q9BRR0]                                          | 15.967 | -8.27  | 0.00013653 | 461  | 22 | 1 | 36 [+] |
| <b>ZMYM2</b>   | MYM-type zinc finger protein 2 (Zinc finger protein 198) (Fused in myeloproliferative disorders protein) (Rearranged in atypical myeloproliferative disorder protein).<br>[Source:Uniprot/SWISSPROT;Acc:Q9UBW7] | 17.196 | -12.42 | 0.0171604  | 279  | 15 | 1 | 42 [+] |
| <b>ZMYM6</b>   | Zinc finger MYM-type protein 6 (Zinc finger protein 258).<br>[Source:Uniprot/SWISSPROT;Acc:O95789]                                                                                                              | 16.232 | -15.67 | 0.042743   | 742  | 15 | 1 | 30 [+] |
| <b>ZNF117</b>  | zinc finger protein 117<br>[Source:RefSeq_peptide;Acc:NP_056936]                                                                                                                                                | 15.632 | -16.34 | 0.00367928 | 1000 | 12 | 2 | 6 [+]  |
| <b>ZNF121</b>  | Zinc finger protein 121 (Zinc finger protein 20) (Fragment).<br>[Source:Uniprot/SWISSPROT;Acc:P58317]                                                                                                           | 16.178 | -10.88 | 0.0034231  | 276  | 10 | 3 | 22 [+] |

|               |                                                                                                                                 |  |        |        |            |      |    |    |        |
|---------------|---------------------------------------------------------------------------------------------------------------------------------|--|--------|--------|------------|------|----|----|--------|
| <b>ZNF124</b> | Zinc finger protein 124 (HZF-16).<br>[Source:Uniprot/SWISSPROT;Acc:Q15973]                                                      |  | 15.568 | -12.77 | 0.00419045 | 677  | 9  | 1  | 11 [+] |
| <b>ZNF124</b> | Zinc finger protein 124 (HZF-16).<br>[Source:Uniprot/SWISSPROT;Acc:Q15973]                                                      |  | 16.97  | -12.77 | 0.0214202  | 146  | 6  | 2  | 20 [+] |
| <b>ZNF17</b>  | Zinc finger protein 17 (Zinc finger protein KOX10) (HPF3).<br>[Source:Uniprot/SWISSPROT;Acc:P17021]                             |  | 15.542 | -16.59 | 9.49E-07   | 1060 | 11 | 3  | 12 [+] |
| <b>ZNF204</b> | NOT ANNOTATED                                                                                                                   |  | 15.373 | -11.55 | 0.00209671 | 913  | 10 | 2  | 11 [+] |
| <b>ZNF207</b> | Zinc finger protein 207.<br>[Source:Uniprot/SWISSPROT;Acc:O43670]                                                               |  | 16.124 | -16.44 | 0.0187714  | 692  | 19 | 10 | 37 [+] |
| <b>ZNF207</b> | Zinc finger protein 207.<br>[Source:Uniprot/SWISSPROT;Acc:O43670]                                                               |  | 16.439 | -16.44 | 0.0352468  | 575  | 14 | 1  | 18 [+] |
| <b>ZNF212</b> | Zinc finger protein 212 (Zinc finger protein C2H2-150).<br>[Source:Uniprot/SWISSPROT;Acc:Q9UDV6]                                |  | 16.261 | -21.05 | 0.0136693  | 1180 | 15 | 4  | 19 [+] |
| <b>ZNF253</b> | Zinc finger protein 93 (Zinc finger protein 505) (Zinc finger protein HTF34).<br>[Source:Uniprot/SWISSPROT;Acc:P35789]          |  | 16.163 | -14.43 | 0.0455601  | 934  | 11 | 1  | 11 [+] |
| <b>ZNF274</b> | Zinc finger protein 274 (Zinc finger protein HFB101) (Zinc finger protein zfp2) (Zf2).<br>[Source:Uniprot/SWISSPROT;Acc:Q96GC6] |  | 16.465 | -12.12 | 0.0136959  | 418  | 17 | 3  | 43 [+] |

|                    |                                                                                                           |  |        |        |            |      |    |    |        |
|--------------------|-----------------------------------------------------------------------------------------------------------|--|--------|--------|------------|------|----|----|--------|
| <b>ZNF277P</b>     | Zinc finger protein 277.<br>[Source:Uniprot/SWISSPROT;Acc:Q9NRM2]                                         |  | 16.404 | -11.45 | 0.0105032  | 300  | 15 | 4  | 54 [+] |
| <b>ZNF29_HUMAN</b> | Zinc finger protein 29 (Zinc finger protein KOX26) (Fragment).<br>[Source:Uniprot/SWISSPROT;Acc:P17037]   |  | 15.402 | -13.16 | 0.00858653 | 1000 | 20 | 1  | 27 [+] |
| <b>ZNF291</b>      | Zinc finger protein 291.<br>[Source:Uniprot/SWISSPROT;Acc:Q9BY12]                                         |  | 17.041 | -15.97 | 0.00057376 | 436  | 21 | 8  | 48 [+] |
| <b>ZNF329</b>      | Zinc finger protein 329<br>[Source:RefSeq_peptide;Acc:NP_078896]                                          |  | 15.988 | -14.25 | 0.0201202  | 823  | 24 | 4  | 32 [+] |
| <b>ZNF403</b>      | Protein ZNF403 (Laryngeal carcinoma-related protein 1).<br>[Source:Uniprot/SWISSPROT;Acc:Q9H3C7]          |  | 15.75  | -11.42 | 0.00360078 | 433  | 23 | 10 | 56 [+] |
| <b>ZNF418</b>      | Zinc finger protein 418.<br>[Source:Uniprot/SWISSPROT;Acc:Q8TF45]                                         |  | 17.353 | -19.53 | 0.0149254  | 522  | 22 | 2  | 40 [+] |
| <b>ZNF419</b>      | Zinc finger protein 419A.<br>[Source:Uniprot/SWISSPROT;Acc:Q96HQ0]                                        |  | 15.533 | -13.73 | 0.0031395  | 1000 | 11 | 1  | 10 [+] |
| <b>ZNF419</b>      | Zinc finger protein 419A.<br>[Source:Uniprot/SWISSPROT;Acc:Q96HQ0]                                        |  | 16.451 | -13.73 | 0.0348506  | 571  | 17 | 1  | 28 [+] |
| <b>ZNF419</b>      | Zinc finger protein 419A.<br>[Source:Uniprot/SWISSPROT;Acc:Q96HQ0]                                        |  | 16.394 | -13.73 | 0.0367418  | 590  | 16 | 3  | 25 [+] |
| <b>ZNF443</b>      | Zinc finger protein 443 (Krueppel-type zinc finger protein ZK1).<br>[Source:Uniprot/SWISSPROT;Acc:Q9Y2A4] |  | 16.013 | -12.94 | 0.0186164  | 449  | 21 | 2  | 51 [+] |

|               |                                                                                                      |  |        |        |            |      |    |   |        |
|---------------|------------------------------------------------------------------------------------------------------|--|--------|--------|------------|------|----|---|--------|
| <b>ZNF454</b> | Zinc finger protein 454.<br>[Source:Uniprot/SWISSPROT;Acc:Q8N9F8]                                    |  | 16.079 | -9.86  | 0.00691404 | 460  | 19 | 3 | 57 [+] |
| <b>ZNF479</b> | Zinc finger protein 479 (Zinc finger protein Kr19) (HKr19).<br>[Source:Uniprot/SWISSPROT;Acc:Q96JC4] |  | 16.404 | -10.42 | 0.036402   | 219  | 9  | 1 | 13 [+] |
| <b>ZNF487</b> | Zinc finger protein 487 (Fragment).<br>[Source:Uniprot/SPTREMBL;Acc:Q5T1H0]                          |  | 16.031 | -14.87 | 1.00E-06   | 1000 | 14 | 3 | 10 [+] |
| <b>ZNF521</b> | Zinc finger protein 521<br>[Source:RefSeq_peptide;Acc:NP_056276]                                     |  | 16.781 | -17.84 | 0.00242658 | 785  | 26 | 6 | 36 [+] |
| <b>ZNF530</b> | Zinc finger protein 530<br>[Source:RefSeq_peptide;Acc:NP_065931]                                     |  | 15.891 | -12.37 | 0.00414472 | 719  | 16 | 3 | 24 [+] |
| <b>ZNF558</b> | Zinc finger protein 558.<br>[Source:Uniprot/SWISSPROT;Acc:Q96NG5]                                    |  | 16.408 | -18    | 0.0356237  | 1575 | 7  | 3 | 7 [+]  |
| <b>ZNF56</b>  | Zinc finger protein 56 (Fragment).<br>[Source:Uniprot/SPTREMBL;Acc:Q15929]                           |  | 16.079 | -15    | 0.00338859 | 1000 | 11 | 1 | 8 [+]  |
| <b>ZNF565</b> | Zinc finger protein 565.<br>[Source:Uniprot/SWISSPROT;Acc:Q8N9K5]                                    |  | 16.63  | -11.93 | 0.00450714 | 172  | 9  | 3 | 24 [+] |
| <b>ZNF571</b> | Zinc finger protein 571.<br>[Source:Uniprot/SWISSPROT;Acc:Q7Z3V5]                                    |  | 15.435 | -11.95 | 0.0106676  | 2164 | 4  | 3 | 5 [+]  |
| <b>ZNF586</b> | Zinc finger protein 586.<br>[Source:Uniprot/SWISSPROT;Acc:Q9NXT0]                                    |  | 15.467 | -22.23 | 0.00012694 | 1267 | 9  | 2 | 6 [+]  |

|               |                                                                                                                           |  |        |        |            |      |    |   |        |
|---------------|---------------------------------------------------------------------------------------------------------------------------|--|--------|--------|------------|------|----|---|--------|
| <b>ZNF594</b> | CDNA FLJ16209 fis, clone CTONG2020378, moderately similar to ZINC FINGER PROTEIN 35. [Source:Uniprot/SPTREMBL;Acc:Q6ZNC6] |  | 16.047 | -14.12 | 0.00217307 | 1000 | 5  | 1 | 6 [+]  |
| <b>ZNF608</b> | Zinc finger protein 608 (Renal carcinoma antigen NY-REN-36). [Source:Uniprot/SWISSPROT;Acc:Q9ULD9]                        |  | 15.406 | -12.68 | 0.00084519 | 983  | 18 | 7 | 35 [+] |
| <b>ZNF613</b> | Zinc finger protein 613. [Source:Uniprot/SWISSPROT;Acc:Q6PF04]                                                            |  | 15.832 | -14.11 | 0.00183961 | 1000 | 12 | 3 | 14 [+] |
| <b>ZNF699</b> | Zinc finger protein 699 (Hangover homolog). [Source:Uniprot/SWISSPROT;Acc:Q32M78]                                         |  | 15.354 | -13.85 | 0.00143978 | 1200 | 11 | 2 | 13 [+] |
| <b>ZNF700</b> | Zinc finger protein 700. [Source:Uniprot/SWISSPROT;Acc:Q9H0M5]                                                            |  | 15.799 | -10.73 | 0.00397563 | 509  | 18 | 2 | 29 [+] |
| <b>ZNF750</b> | Protein ZNF750. [Source:Uniprot/SWISSPROT;Acc:Q32MQ0]                                                                     |  | 16.269 | -15.01 | 0.0412837  | 707  | 19 | 4 | 33 [+] |
| <b>ZNF799</b> | Zinc finger protein 799. [Source:Uniprot/SWISSPROT;Acc:Q96GE5]                                                            |  | 16.013 | -12.94 | 0.0188969  | 449  | 22 | 2 | 51 [+] |
| <b>ZNF83</b>  | Zinc finger protein 83 (Zinc finger protein HPF1). [Source:Uniprot/SWISSPROT;Acc:P51522]                                  |  | 16.057 | -12.63 | 4.70E-05   | 636  | 23 | 3 | 28 [+] |

|               |                                                                                                                                                                                                                                                                                                         |  |        |        |            |      |    |   |        |
|---------------|---------------------------------------------------------------------------------------------------------------------------------------------------------------------------------------------------------------------------------------------------------------------------------------------------------|--|--------|--------|------------|------|----|---|--------|
| <b>ZNF83</b>  | Zinc finger protein 83 (Zinc finger protein HPF1).<br>[Source:Uniprot/SWISSPROT;Acc:P51522]                                                                                                                                                                                                             |  | 15.355 | -12.63 | 0.00013579 | 1000 | 12 | 1 | 12 [+] |
| <b>ZRSR1</b>  | U2 small nuclear ribonucleoprotein auxiliary factor 35 kDa subunit-related protein 2 (U2(RNU2) small nuclear RNA auxiliary factor 1-like 2) (CCCH type zinc finger, RNA-binding motif and serine/arginine rich protein 2) (Renal carcinoma antigen NY-REN-20).<br>[Source:Uniprot/SWISSPROT;Acc:Q15696] |  | 16.857 | -14.69 | 0.0238243  | 276  | 13 | 1 | 38 [+] |
| <b>ZSWIM2</b> | Zinc finger SWIM domain-containing protein 2 (Zinc finger ZZ-type-containing protein 2).<br>[Source:Uniprot/SWISSPROT;Acc:Q8NEG5]                                                                                                                                                                       |  | 17.383 | -14.93 | 0.00520399 | 504  | 17 | 6 | 34 [+] |
| <b>ZZZ3</b>   | Zinc finger, ZZ domain containing 3<br>[Source:RefSeq_peptide;Acc:NP_056349]                                                                                                                                                                                                                            |  | 17.319 | -20.8  | 0.015417   | 752  | 17 | 1 | 19 [+] |
| <b>ZZZ3</b>   | Zinc finger, ZZ domain containing 3<br>[Source:RefSeq_peptide;Acc:NP_056349]                                                                                                                                                                                                                            |  | 16.611 | -20.8  | 0.0216181  | 1140 | 17 | 5 | 17 [+] |

|                                                                                                                                                                                                                                                                                                                                                          |        |        |            |      |    |   |        |
|----------------------------------------------------------------------------------------------------------------------------------------------------------------------------------------------------------------------------------------------------------------------------------------------------------------------------------------------------------|--------|--------|------------|------|----|---|--------|
| 28 kDa heat- and acid-stable phosphoprotein (PDGF-associated protein) (PAP) (PDGFA-associated protein 1) (PAP1).<br>[Source:Uniprot/SWISSPROT;Acc:Q13442]28 kDa heat- and acid-stable phosphoprotein (PDGF-associated protein) (PAP) (PDGFA-associated protein 1) (PAP1).<br>[Source:Uniprot/SWISSPROT;Acc:Q13442] BY ORTHOLOGY<br>TO:ENSBTAT00000037136 | 15.718 | -12.08 | 8.77E-05   | 1000 | 26 | 7 | 37 [+] |
| NOT ANNOTATED                                                                                                                                                                                                                                                                                                                                            | 15.545 | -16.86 | 0.0003126  | 1000 | 22 | 3 | 21 [+] |
| NOT ANNOTATED                                                                                                                                                                                                                                                                                                                                            | 16.662 | -15.22 | 0.00211158 | 1000 | 12 | 2 | 11 [+] |
| NOT ANNOTATED                                                                                                                                                                                                                                                                                                                                            | 16.628 | -15.49 | 0.00216782 | 1000 | 10 | 1 | 10 [+] |
| NOT ANNOTATED                                                                                                                                                                                                                                                                                                                                            | 16.628 | -15.49 | 0.00223553 | 1000 | 9  | 1 | 9 [+]  |
| NOT ANNOTATED                                                                                                                                                                                                                                                                                                                                            | 16.628 | -15.49 | 0.00223553 | 1000 | 8  | 2 | 8 [+]  |
| NOT ANNOTATED                                                                                                                                                                                                                                                                                                                                            | 15.651 | -19.63 | 0.00303707 | 1000 | 15 | 2 | 19 [+] |
| NOT ANNOTATED                                                                                                                                                                                                                                                                                                                                            | 15.799 | -13.96 | 0.00323439 | 1000 | 11 | 1 | 17 [+] |
| NOT ANNOTATED                                                                                                                                                                                                                                                                                                                                            | 18.44  | -19.99 | 0.00533222 | 140  | 8  | 2 | 22 [+] |
| Homolog of Brachydanio rerio "Ion channel NompC."<br>[Source:Uniprot/SPTREMBL;Acc:Q7T1G6]"Homolog of Brachydanio rerio "Ion channel NompC."<br>[Source:Uniprot/SPTREMBL;Acc:Q7T1G6]" BY ORTHOLOGY<br>TO:SINFRUT00000151246                                                                                                                               | 15.469 | -12.51 | 0.00724804 | 1000 | 19 | 3 | 20 [+] |
| NOT ANNOTATED                                                                                                                                                                                                                                                                                                                                            | 18.06  | -14.16 | 0.00764873 | 1000 | 11 | 1 | 11 [+] |
| NOT ANNOTATED                                                                                                                                                                                                                                                                                                                                            | 15.832 | -14.29 | 0.0111116  | 1000 | 11 | 2 | 13 [+] |
| NOT ANNOTATED                                                                                                                                                                                                                                                                                                                                            | 17.309 | -14.48 | 0.0155574  | 1000 | 7  | 1 | 12 [+] |
| NOT ANNOTATED                                                                                                                                                                                                                                                                                                                                            | 16.103 | -18.68 | 0.0195991  | 1000 | 24 | 2 | 28 [+] |
| NOT ANNOTATED                                                                                                                                                                                                                                                                                                                                            | 16.827 | -20.15 | 0.0244905  | 1000 | 17 | 2 | 21 [+] |



|  |               |  |        |        |           |      |    |   |        |
|--|---------------|--|--------|--------|-----------|------|----|---|--------|
|  | NOT ANNOTATED |  | 16.827 | -16.94 | 0.0244905 | 1000 | 11 | 1 | 10 [+] |
|  | NOT ANNOTATED |  | 15.725 | -15.79 | 0.0351617 | 140  | 7  | 3 | 23 [+] |
|  | NOT ANNOTATED |  | 16.429 | -23.3  | 0.0355658 | 1000 | 13 | 2 | 16 [+] |
|  | NOT ANNOTATED |  | 16.324 | -18.14 | 0.0392439 | 1000 | 13 | 1 | 14 [+] |
|  | NOT ANNOTATED |  | 16.143 | -16.85 | 0.0464127 | 1000 | 9  | 1 | 12 [+] |

**Supplementary Table 13. Predicted targets of hsa-miR-181a-3p by miRanda-mirSVR.**

| Gene symbol | Full name                                                               | Cancer gene |
|-------------|-------------------------------------------------------------------------|-------------|
| AACS        | Acetoacetyl-CoA synthetase                                              |             |
| AAK1        | AP2 associated kinase 1                                                 |             |
| AASDHPPT    | Aminoadipate-semialdehyde dehydrogenase-phosphopantetheinyl transferase |             |
| AATF        | Apoptosis antagonizing transcription factor                             |             |
| ABCA11P     | ATP-binding cassette, sub-family A (ABC1), member 11, pseudogene        |             |
| ABCA13      | ATP-binding cassette, sub-family A (ABC1), member 13                    |             |
| ABCB5       | ATP-binding cassette, sub-family B (MDR/TAP), member 5                  |             |
| ABCB8       | ATP-binding cassette, sub-family B (MDR/TAP), member 8                  |             |
| ABCC5       | ATP-binding cassette, sub-family C (CFTR/MRP), member 5                 |             |
| ABCC9       | ATP-binding cassette, sub-family C (CFTR/MRP), member 9                 |             |
| ABCD1       | ATP-binding cassette, sub-family D (ALD), member 1                      |             |
| ABCF2       | ATP-binding cassette, sub-family F (GCN20), member 2                    |             |
| ABHD2       | Abhydrolase domain containing 2                                         |             |
| ABHD5       | Abhydrolase domain containing 5                                         |             |
| ABI2        | Abl-interactor 2                                                        | √           |
| ACACB       | Acetyl-CoA carboxylase beta                                             |             |
| ACAP2       | ArfGAP with coiled-coil, ankyrin repeat and PH domains 2                |             |
| ACBD3       | Acyl-CoA binding domain containing 3                                    |             |
| ACCN1       | Acid-sensing (proton-gated) ion channel 2                               |             |
| ACE         | Angiotensin I converting enzyme                                         |             |
| ACER2       | Alkaline ceramidase 2                                                   |             |
| ACIN1       | Apoptotic chromatin condensation inducer 1                              |             |
| ACTR3       | ARP3 actin-related protein 3 homolog (yeast)                            |             |
| ACTR3B      | ARP3 actin-related protein 3 homolog B (yeast)                          |             |
| ACY3        | Aspartoacylase (aminocyclase) 3                                         |             |
| ADAM10      | ADAM metallopeptidase domain 10                                         |             |
| ADAM15      | ADAM metallopeptidase domain 15                                         |             |
| ADAM19      | ADAM metallopeptidase domain 19                                         |             |

|          |                                                            |  |
|----------|------------------------------------------------------------|--|
| ADAM5P   | ADAM metallopeptidase domain 5, pseudogene                 |  |
| ADAM9    | ADAM metallopeptidase domain 9                             |  |
| ADAMTS13 | ADAM metallopeptidase with thrombospondin type 1 motif, 13 |  |
| ADAMTS3  | ADAM metallopeptidase with thrombospondin type 1 motif, 3  |  |
| ADARB1   | Adenosine deaminase, RNA-specific, B1                      |  |
| ADAT2    | Adenosine deaminase, tRNA-specific 2                       |  |
| ADC      | Arginine decarboxylase                                     |  |
| ADCYAP1  | Adenylate cyclase activating polypeptide 1 (pituitary)     |  |
| ADD1     | Adducin 1 (alpha)                                          |  |
| ADIPOR2  | Adiponectin receptor 2                                     |  |
| ADM2     | Adrenomedullin 2                                           |  |
| ADNP2    | ADNP homeobox 2                                            |  |
| ADRA2B   | Adrenoceptor alpha 2B                                      |  |
| ADRBK2   | Adrenergic, beta, receptor kinase 2                        |  |
| AES      | Amino-terminal enhancer of split                           |  |
| AFAP1    | Actin filament associated protein 1                        |  |
| AFARP1   | Aldo-keto reductase family 7, member A2 pseudogene 1       |  |
| AFF2     | AF4/FMR2 family, member 2                                  |  |
| AFG3L1   | AFG3-like AAA ATPase 1, pseudogene                         |  |
| AFMID    | Arylformamidase                                            |  |
| AG2      | Anterior gradient 2                                        |  |
| AGBL5    | ATP/GTP binding protein-like 5                             |  |
| AGK      | Acylglycerol kinase                                        |  |
| AGPAT2   | 1-Acylglycerol-3-phosphate O-acyltransferase 2             |  |
| AGPAT3   | 1-Acylglycerol-3-phosphate O-acyltransferase 3             |  |
| AGPAT4   | 1-Acylglycerol-3-phosphate O-acyltransferase 4             |  |
| AGPAT6   | 1-Acylglycerol-3-phosphate O-acyltransferase 6             |  |
| AHR      | Aryl hydrocarbon receptor                                  |  |
| AHRR     | Aryl-hydrocarbon receptor repressor                        |  |
| AIRE     | Autoimmune regulator                                       |  |
| AK3L1    | Adenylate kinase 3-like 1                                  |  |

|          |                                                                  |  |
|----------|------------------------------------------------------------------|--|
| AKAP7    | A kinase (PRKA) anchor protein 7                                 |  |
| AKNA     | AT-hook transcription factor                                     |  |
| AKR1D1   | Aldo-keto reductase family 1, member D1                          |  |
| ALDH18A1 | Aldehyde dehydrogenase 18 family, member A1                      |  |
| ALDH6A1  | Aldehyde dehydrogenase 6 family, member A1                       |  |
| ALG6     | ALG6, alpha-1,3-glucosyltransferase                              |  |
| AMOT     | Angiomotin                                                       |  |
| AMOTL1   | Angiomotin like 1                                                |  |
| AMPD3    | Adenosine monophosphate deaminase 3                              |  |
| AMT      | Aminomethyltransferase                                           |  |
| AMTN     | Amelotin                                                         |  |
| AMY2B    | Amylase, alpha 2B (pancreatic)                                   |  |
| ANAPC11  | Anaphase promoting complex subunit 11                            |  |
| ANAPC2   | Anaphase promoting complex subunit 2                             |  |
| ANAPC7   | Anaphase promoting complex subunit 7                             |  |
| ANK2     | Ankyrin 2, neuronal                                              |  |
| ANKH     | ANKH inorganic pyrophosphate transport regulator                 |  |
| ANKRD13B | Ankyrin repeat domain 13B                                        |  |
| ANKRD22  | Ankyrin repeat domain 22                                         |  |
| ANKRD27  | Ankyrin repeat domain 27 (VPS9 domain)                           |  |
| ANKRD36  | Ankyrin repeat domain 36                                         |  |
| ANKRD36B | Ankyrin repeat domain 36B                                        |  |
| ANKRD44  | Ankyrin repeat domain 44                                         |  |
| ANKRD54  | Ankyrin repeat domain 54                                         |  |
| ANKRD58  | Sosondowah ankyrin repeat domain family member D                 |  |
| ANKS1A   | Ankyrin repeat and sterile alpha motif domain containing 1A      |  |
| ANKS6    | Ankyrin repeat and sterile alpha motif domain containing 6       |  |
| ANO1     | Anoctamin 1, calcium activated chloride channel                  |  |
| ANO4     | Anoctamin 4                                                      |  |
| ANP32E   | Acidic (leucine-rich) nuclear phosphoprotein 32 family, member E |  |
| ANPEP    | Alanine (membrane) aminopeptidase                                |  |

|          |                                                                     |  |
|----------|---------------------------------------------------------------------|--|
| ANXA3    | Annexin A3                                                          |  |
| AP1S1    | Adaptor-related protein complex 1, sigma 1 subunit                  |  |
| AP1S3    | Adaptor-related protein complex 1, sigma 3 subunit                  |  |
| AP4M1    | Adaptor-related protein complex 4, mu 1 subunit                     |  |
| APBB2    | Amyloid beta (A4) precursor protein-binding, family B, member 2     |  |
| APC2     | Adenomatosis polyposis coli 2                                       |  |
| APH1B    | APH1B gamma secretase subunit                                       |  |
| APLNR    | Apelin receptor                                                     |  |
| APOBEC3B | Apolipoprotein B mRNA editing enzyme, catalytic polypeptide-like 3B |  |
| APOL2    | Apolipoprotein L, 2                                                 |  |
| APOL6    | Apolipoprotein L, 6                                                 |  |
| APP      | Amyloid beta (A4) precursor protein                                 |  |
| APPBP2   | Amyloid beta precursor protein (cytoplasmic tail) binding protein 2 |  |
| AQP12B   | Aquaporin 12B                                                       |  |
| AQP9     | Aquaporin 9                                                         |  |
| ARF4     | ADP-ribosylation factor 4                                           |  |
| ARFGAP2  | ADP-ribosylation factor GTPase activating protein 2                 |  |
| ARHGAP20 | Rho GTPase activating protein 20                                    |  |
| ARHGAP26 | Rho GTPase activating protein 26                                    |  |
| ARHGDI1A | Rho GDP dissociation inhibitor (GDI) alpha                          |  |
| ARHGEF10 | Rho guanine nucleotide exchange factor (GEF) 10                     |  |
| ARHGEF33 | Rho guanine nucleotide exchange factor (GEF) 33                     |  |
| ARL2BP   | ADP-ribosylation factor-like 2 binding protein                      |  |
| ARL4A    | ADP-ribosylation factor-like 4A                                     |  |
| ARMC7    | Armadillo repeat containing 7                                       |  |
| ARMCX4   | Armadillo repeat containing, X-linked 4                             |  |
| ARNTL    | Aryl hydrocarbon receptor nuclear translocator-like                 |  |
| ARPC1A   | Actin related protein 2/3 complex, subunit 1A, 41kDa                |  |
| ARSD     | Arylsulfatase D                                                     |  |
| ARSK     | Arylsulfatase family, member K                                      |  |
| ASB1     | Ankyrin repeat and SOCS box containing 1                            |  |

|          |                                                                                             |   |
|----------|---------------------------------------------------------------------------------------------|---|
| ATAD5    | ATPase family, AAA domain containing 5                                                      |   |
| ATCAY    | Ataxia, cerebellar, Cayman type                                                             |   |
| ATG16L1  | Autophagy related 16-like 1 ( <i>S. cerevisiae</i> )                                        |   |
| ATG16L2  | Autophagy related 16-like 2 ( <i>S. cerevisiae</i> )                                        |   |
| ATG2A    | Autophagy related 2A                                                                        |   |
| ATG7     | Autophagy related 7                                                                         |   |
| ATM      | ATM serine/threonine kinase                                                                 | √ |
| ATP10B   | ATPase, class V, type 10B                                                                   |   |
| ATP11A   | ATPase, class VI, type 11A                                                                  |   |
| ATP13A4  | ATPase type 13A4                                                                            |   |
| ATP4A    | ATPase, H <sup>+</sup> /K <sup>+</sup> exchanging, alpha polypeptide                        |   |
| ATP5G3   | ATP synthase, H <sup>+</sup> transporting, mitochondrial Fo complex, subunit C3 (subunit 9) |   |
| ATP6V0A2 | ATPase, H <sup>+</sup> transporting, lysosomal V0 subunit a2                                |   |
| ATP6V1C2 | ATPase, H <sup>+</sup> transporting, lysosomal 42 kDa, V1 subunit C2                        |   |
| ATP8A2   | ATPase, aminophospholipid transporter, class I, type 8A, member 2                           |   |
| ATP9B    | ATPase, class II, type 9B                                                                   |   |
| ATR      | ATR serine/threonine kinase                                                                 |   |
| ATXN3    | Ataxin 3                                                                                    |   |
| AXIN1    | Axin 1                                                                                      | √ |
| B3GALT6  | UDP-Gal:betaGal beta 1,3-galactosyltransferase polypeptide 6                                |   |
| B3GNTL1  | UDP-GlcNAc:betaGal beta-1,3- <i>N</i> -acetylglucosaminyltransferase-like 1                 |   |
| B4GALT1  | UDP-Gal:betaGlcNAc beta 1,4- galactosyltransferase, polypeptide 1                           |   |
| B4GALT5  | UDP-Gal:betaGlcNAc beta 1,4- galactosyltransferase, polypeptide 5                           |   |
| BACE2    | Beta-site APP-cleaving enzyme 2                                                             |   |
| BAIAP2   | BAI1-associated protein 2                                                                   |   |
| BANP     | BTG3 associated nuclear protein                                                             |   |
| BASE     | BPI fold containing family A, member 4                                                      |   |
| BAT2     | Proline-rich coiled-coil 2A                                                                 |   |
| BAT2L1   | Proline-rich coiled-coil 2B                                                                 |   |
| BCKDK    | branched chain ketoacid dehydrogenase kinase                                                |   |
| BCL11A   | B-cell CLL/lymphoma 11A (zinc finger protein)                                               | √ |

|            |                                                                                    |   |
|------------|------------------------------------------------------------------------------------|---|
| BCL2       | B-cell CLL/lymphoma 2                                                              | √ |
| BDH1       | 3-Hydroxybutyrate dehydrogenase, type 1                                            |   |
| BDKRB2     | Bradykinin receptor B2                                                             |   |
| BEND2      | BEN domain containing 2                                                            |   |
| BEND3      | BEN domain containing 3                                                            |   |
| BEND7      | BEN domain containing 7                                                            |   |
| BGN        | Biglycan                                                                           |   |
| BMP1       | Bone morphogenetic protein 1                                                       |   |
| BMP7       | Bone morphogenetic protein 7                                                       |   |
| BPESC1     | Blepharophimosis, epicanthus inversus and ptosis, candidate 1 (non-protein coding) |   |
| BRD2       | Bromodomain containing 2                                                           |   |
| BRPF3      | bromodomain and PHD finger containing, 3                                           |   |
| BTBD7      | BTB (POZ) domain containing 7                                                      |   |
| BTBD9      | BTB (POZ) domain containing 9                                                      |   |
| BTG1       | B-cell translocation gene 1, anti-proliferative                                    | √ |
| BTG1       | B-cell translocation gene 1, anti-proliferative                                    |   |
| C10orf26   | WW domain binding protein 1-like                                                   |   |
| C10orf4    | Fragile site, folic acid type, rare, fra(10)(q23.3) or fra(10)(q24.2) candidate 1  |   |
| C10orf41   | ZNF503 antisense RNA 2                                                             |   |
| C10orf44   | ZNF32 antisense RNA 3                                                              |   |
| C10orf54   | Chromosome 10 open reading frame 54                                                |   |
| C10orf72   | V-set and transmembrane domain containing 4                                        |   |
| C11orf20   | Testis expressed 40                                                                |   |
| C11orf57   | Chromosome 11 open reading frame 57                                                |   |
| C12orf23   | Transmembrane protein 263                                                          |   |
| C12orf49   | Chromosome 12 open reading frame 49                                                |   |
| C12orf5    | Chromosome 12 open reading frame 5                                                 |   |
| C12orf61   | Long intergenic non-protein coding RNA 1465                                        |   |
| C12orf74   | Chromosome 12 open reading frame 74                                                |   |
| C12orf75   | Chromosome 12 open reading frame 75                                                |   |
| C14orf166B | Chromosome 15 open reading frame, human C14orf166B                                 |   |

|           |                                                         |  |
|-----------|---------------------------------------------------------|--|
| C14orf25  | Tetratricopeptide repeat domain 6                       |  |
| C14orf28  | Chromosome 14 open reading frame 28                     |  |
| C14orf79  | Chromosome 14 open reading frame 79                     |  |
| C15orf17  | Family with sequence similarity 219, member B           |  |
| C15orf37  | Chromosome 15 open reading frame 37                     |  |
| C15orf42  | TOPBP1-interacting checkpoint and replication regulator |  |
| C15orf62  | Chromosome 15 open reading frame 62                     |  |
| C16orf52  | Chromosome 16 open reading frame 52                     |  |
| C16orf55  | Spermatogenesis associated 33                           |  |
| C16orf57  | U6 snRNA biogenesis 1                                   |  |
| C16orf61  | Chromosome 11 open reading frame, human C16orf61        |  |
| C16orf63  | FGFR1OP N-terminal like                                 |  |
| C16orf81  | Long intergenic non-protein coding RNA 304              |  |
| C16orf82  | Chromosome 16 open reading frame 82                     |  |
| C16orf86  | Chromosome 16 open reading frame 86                     |  |
| C16orf92  | Chromosome 16 open reading frame 92                     |  |
| C17orf100 | Chromosome 17 open reading frame 100                    |  |
| C17orf103 | N-acetyltransferase domain containing 1                 |  |
| C17orf107 | Chromosome 17 open reading frame 107                    |  |
| C17orf48  | Chromosome 18 open reading frame, human C17orf48        |  |
| C17orf51  | Chromosome 17 open reading frame 51                     |  |
| C17orf56  | ENTH domain containing 2                                |  |
| C17orf68  | CTS telomere maintenance complex component 1            |  |
| C17orf86  | SEC14-like 1 ( <i>S. cerevisiae</i> )                   |  |
| C17orf96  | Chromosome 17 open reading frame 96                     |  |
| C18orf8   | Chromosome 18 open reading frame 8                      |  |
| C19orf12  | Chromosome 19 open reading frame 12                     |  |
| C19orf36  | IZUMO family member 4                                   |  |
| C19orf62  | BRISC and BRCA1 A complex member 1                      |  |
| C19orf75  | SIGLEC family like 1                                    |  |
| C1orf167  | Chromosome 1 open reading frame 167                     |  |



|           |                                                                      |  |
|-----------|----------------------------------------------------------------------|--|
| C1orf187  | Chromosome 21 open reading frame, human C1orf187                     |  |
| C1orf200  | Chromosome 1 open reading frame 200                                  |  |
| C1orf201  | Sperm-tail PG-rich repeat containing 1                               |  |
| C1orf213  | Chromosome 1 open reading frame 213                                  |  |
| C1orf64   | Chromosome 1 open reading frame 64                                   |  |
| C1orf69   | IBA57, iron-sulfur cluster assembly homolog ( <i>S. cerevisiae</i> ) |  |
| C1orf81   | Maestro heat-like repeat family member 3, pseudogene                 |  |
| C1orf89   | REM2 and RAB-like small GTPase 1                                     |  |
| C1orf96   | Chromosome 3 open reading frame, human C1orf96                       |  |
| C20orf160 | Chromosome 20 open reading frame, human C20orf160                    |  |
| C20orf197 | Chromosome 20 open reading frame 197                                 |  |
| C20orf199 | ZNFX1 antisense RNA 1                                                |  |
| C20orf3   | Adipocyte plasma membrane associated protein                         |  |
| C21orf105 | Endogenous retrovirus group 48, member 1                             |  |
| C21orf105 | Endogenous retrovirus group 48, member 1                             |  |
| C21orf58  | Chromosome 21 open reading frame 58                                  |  |
| C21orf90  | Chromosome 21 open reading frame 90                                  |  |
| C21orf99  | Ankyrin repeat domain 30B pseudogene 2                               |  |
| C22orf26  | Proline rich 34                                                      |  |
| C22orf29  | Chromosome 22 open reading frame 29                                  |  |
| C22orf30  | Proline rich 14-like                                                 |  |
| C22orf9   | Chromosome 22 open reading frame 9                                   |  |
| C3orf19   | Coiled-coil domain containing 174                                    |  |
| C3orf42   | Long intergenic non-protein coding RNA 852                           |  |
| C3orf67   | Chromosome 3 open reading frame 67                                   |  |
| C4orf12   | WDFY3 antisense RNA 2                                                |  |
| C5orf35   | SET domain containing 9                                              |  |
| C5orf41   | CREB3 regulatory factor                                              |  |
| C6orf168  | Chromosome 3 open reading frame, human C6orf168                      |  |
| C6orf192  | Chromosome 3 open reading frame, human C6orf192                      |  |
| C6orf208  | Long intergenic non-protein coding RNA 574                           |  |

|          |                                                                        |   |
|----------|------------------------------------------------------------------------|---|
| C6orf225 | Chromosome 6 open reading frame 225 homolog                            |   |
| C6orf35  | Chromosome 6 open reading frame 35                                     |   |
| C6orf41  | Chromosome 6 open reading frame 41                                     |   |
| C7orf41  | Maturin, neural progenitor differentiation regulator homolog (Xenopus) |   |
| C7orf58  | Cadherin-like and PC-esterase domain containing 1                      |   |
| C7orf65  | Chromosome 7 open reading frame 65                                     |   |
| C8orf38  | NADH dehydrogenase (ubiquinone) complex I, assembly factor 6           |   |
| C8orf40  | Small integral membrane protein 19                                     |   |
| C8orf49  | Chromosome 8 open reading frame 49                                     |   |
| C8orf68  | ERICH1 antisense RNA 1                                                 |   |
| C9orf109 | Family with sequence similarity 225, member A (non-protein coding)     |   |
| C9orf110 | Chromosome 9 open reading frame 110                                    |   |
| C9orf114 | Chromosome 9 open reading frame 114                                    |   |
| C9orf140 | Chromosome 17 open reading frame, human C9orf140                       |   |
| C9orf144 | Family with sequence similarity 205, member B                          |   |
| C9orf150 | Chromosome Z open reading frame, human C9orf150                        |   |
| C9orf153 | Chromosome 9 open reading frame 153                                    |   |
| C9orf6   | Chromosome 9 open reading frame 6                                      |   |
| C9orf80  | INTS3 and NABP interacting protein                                     |   |
| C9orf86  | RAB, member RAS oncogene family-like 6                                 |   |
| C9orf96  | Serine/threonine kinase-like domain containing 1                       |   |
| CA12     | Carbonic anhydrase XII                                                 |   |
| CA3      | Carbonic anhydrase III, muscle specific                                |   |
| CA4      | Carbonic anhydrase IV                                                  |   |
| CABC1    | Chaperone, ABC1 activity of bc1 complex like ( <i>S. pombe</i> )       |   |
| CABP7    | Calcium binding protein 7                                              |   |
| CACNA1A  | Calcium channel, voltage-dependent, P/Q type, alpha 1A subunit         |   |
| CACNA1B  | Calcium channel, voltage-dependent, N type, alpha 1B subunit           |   |
| CACNA1C  | Calcium channel, voltage-dependent, L type, alpha 1C subunit           |   |
| CACNA1D  | Calcium channel, voltage-dependent, L type, alpha 1D subunit           | √ |
| CACNA2D3 | Calcium channel, voltage-dependent, alpha 2/delta subunit 3            |   |

|          |                                                                   |   |
|----------|-------------------------------------------------------------------|---|
| CACNB2   | Calcium channel, voltage-dependent, beta 2 subunit                |   |
| CALB2    | Calbindin 2                                                       |   |
| CALM1    | Calmodulin 1 (phosphorylase kinase, delta)                        |   |
| CALN1    | Calneuron 1                                                       |   |
| CAPN14   | Calpain 14                                                        |   |
| CARKD    | Carbohydrate kinase domain containing                             |   |
| CASK     | Calcium/calmodulin-dependent serine protein kinase (MAGUK family) |   |
| CASP8    | Caspase 8, apoptosis-related cysteine peptidase                   | √ |
| CASZ1    | Castor zinc finger 1                                              |   |
| CAV1     | Caveolin 1, caveolae protein, 22kDa                               |   |
| CBX7     | Chromobox homolog 7                                               |   |
| CC2D1B   | Coiled-coil and C2 domain containing 1B                           |   |
| CCDC137  | Coiled-coil domain containing 137                                 |   |
| CCDC144B | Coiled-coil domain containing 144B (pseudogene)                   |   |
| CCDC144C | Coiled-coil domain containing 144C, pseudogene                    |   |
| CCDC152  | Coiled-coil domain containing 152                                 |   |
| CCDC22   | Coiled-coil domain containing 22                                  |   |
| CCDC62   | Coiled-coil domain containing 62                                  |   |
| CCDC7    | Coiled-coil domain containing 7                                   |   |
| CCDC78   | Coiled-coil domain containing 78                                  |   |
| CCDC88B  | Coiled-coil domain containing 88B                                 |   |
| CCKBR    | Cholecystokinin B receptor                                        |   |
| CCND2    | Cyclin D2                                                         |   |
| CCNL2    | Cyclin L2                                                         |   |
| CCS      | Copper chaperone for superoxide dismutase                         |   |
| CD34     | CD34 molecule                                                     |   |
| CD69     | CD69 molecule                                                     |   |
| CD93     | CD93 molecule                                                     |   |
| CD99L2   | CD99 molecule-like 2                                              |   |
| CDC14B   | Cell division cycle 14B                                           |   |
| CDC14C   | Cell division cycle 14C                                           |   |

|          |                                                           |   |
|----------|-----------------------------------------------------------|---|
| CDH1     | Cadherin 1, type 1, E-cadherin (epithelial)               | √ |
| CDK12    | Cyclin-dependent kinase 12                                | √ |
| CDK19    | Cyclin-dependent kinase 19                                |   |
| CDK5RAP2 | CDK5 regulatory subunit associated protein 2              |   |
| CDK9     | Cyclin-dependent kinase 9                                 |   |
| CDKN2B   | Cyclin-dependent kinase inhibitor 2B (p15, inhibits CDK4) |   |
| CEBPA    | CCAAT/enhancer binding protein (C/EBP), alpha             | √ |
| CELF1    | CUGBP, Elav-like family member 1                          |   |
| CELF2    | CUGBP, Elav-like family member 2                          |   |
| CENPO    | Centromere protein O                                      |   |
| CENPT    | Centromere protein T                                      |   |
| CEP192   | Centrosomal protein 192kDa                                |   |
| CEP250   | Centrosomal protein 250kDa                                |   |
| CEP63    | Centrosomal protein 63kDa                                 |   |
| CES3     | Carboxylesterase 3                                        |   |
| CES4     | Carboxylesterase 4                                        |   |
| CFL2     | Cofilin 2 (muscle)                                        |   |
| CFLAR    | CASP8 and FADD-like apoptosis regulator                   |   |
| CHCHD7   | Coiled-coil-helix-coiled-coil-helix domain containing 7   | √ |
| CHD1L    | Chromodomain helicase DNA binding protein 1-like          |   |
| CHD5     | Chromodomain helicase DNA binding protein 5               |   |
| CHMP4B   | Charged multivesicular body protein 4B                    |   |
| CHST10   | Carbohydrate sulfotransferase 10                          |   |
| CHST13   | Carbohydrate (chondroitin 4) sulfotransferase 13          |   |
| CHST3    | Carbohydrate (chondroitin 6) sulfotransferase 3           |   |
| CILP2    | Cartilage intermediate layer protein 2                    |   |
| CKMT1B   | Creatine kinase, mitochondrial 1B                         |   |
| CLCNKA   | Chloride channel, voltage-sensitive Ka                    |   |
| CLCNKB   | Chloride channel, voltage-sensitive Kb                    |   |
| CLDN12   | Claudin 12                                                |   |
| CLEC2D   | C-type lectin domain family 2, member D                   |   |

|          |                                                                   |  |
|----------|-------------------------------------------------------------------|--|
| CLK3     | CDC-like kinase 3                                                 |  |
| CLRN1OS  | CLRN1 antisense RNA 1                                             |  |
| CMAS     | Cytidine monophosphate N-acetylneuraminic acid synthetase         |  |
| CMKLR1   | Chemokine-like receptor 1                                         |  |
| CMTM4    | CKLF-like MARVEL transmembrane domain containing 4                |  |
| CNNM3    | Cyclin and CBS domain divalent metal cation transport mediator 3  |  |
| CNPY1    | Canopy FGF signaling regulator 1                                  |  |
| CNTNAP1  | Contactin associated protein 1                                    |  |
| CNTNAP3B | Contactin associated protein-like 3B                              |  |
| COG3     | Component of oligomeric golgi complex 3                           |  |
| COG6     | Component of oligomeric golgi complex 6                           |  |
| COL24A1  | Collagen, type XXIV, alpha 1                                      |  |
| COL27A1  | Collagen, type XXVII, alpha 1                                     |  |
| COL29A1  | Collagen, type VI, alpha 5                                        |  |
| COL5A1   | Collagen, type V, alpha 1                                         |  |
| COL9A2   | Collagen, type IX, alpha 2                                        |  |
| COMMD4   | COMM domain containing 4                                          |  |
| COPS7B   | COP9 signalosome subunit 7B                                       |  |
| COPS7B   | COP9 signalosome subunit 7B                                       |  |
| CORIN    | Corin, serine peptidase                                           |  |
| CORO2A   | Coronin, actin binding protein, 2A                                |  |
| CORO2B   | Coronin, actin binding protein, 2B                                |  |
| COX19    | Cytochrome c oxidase assembly homolog 19 ( <i>S. cerevisiae</i> ) |  |
| CPA4     | Carboxypeptidase A4                                               |  |
| CPEB4    | Cytoplasmic polyadenylation element binding protein 4             |  |
| CPLX2    | Complexin 2                                                       |  |
| CPNE2    | Copine II                                                         |  |
| CPS1     | Carbamoyl-phosphate synthase 1, mitochondrial                     |  |
| CPT1A    | Carnitine palmitoyltransferase 1A (liver)                         |  |
| CRADD    | CASP2 and RIPK1 domain containing adaptor with death domain       |  |
| CRB1     | Crumbs family member 1, photoreceptor morphogenesis associated    |  |

|         |                                                                                        |   |
|---------|----------------------------------------------------------------------------------------|---|
| CREB1   | CAMP responsive element binding protein 1                                              | √ |
| CRK     | V-crk avian sarcoma virus CT10 oncogene homolog                                        |   |
| CRMP1   | Collapsin response mediator protein 1                                                  |   |
| CRTC1   | CREB regulated transcription coactivator 1                                             |   |
| CRTC3   | CREB regulated transcription coactivator 3                                             | √ |
| CRX     | Cone-rod homeobox                                                                      |   |
| CSDC2   | Cold shock domain containing C2, RNA binding                                           |   |
| CSNK1E  | Casein kinase 1, epsilon                                                               |   |
| CSNK1G1 | Casein kinase 1, gamma 1                                                               |   |
| CTCFL   | CCCTC-binding factor (zinc finger protein)-like                                        |   |
| CTDSPL  | CTD (carboxy-terminal domain, RNA polymerase II, polypeptide A) small phosphatase-like |   |
| CTLA4   | Cytotoxic T-lymphocyte-associated protein 4                                            |   |
| CTPS    | CTP synthase 1                                                                         |   |
| CTSC    | Cathepsin C                                                                            |   |
| CTSK    | Cathepsin K                                                                            |   |
| CTSZ    | Cathepsin Z                                                                            |   |
| CUX2    | Cut-like homeobox 2                                                                    |   |
| CWC27   | CWC27 spliceosome-associated protein homolog ( <i>S. cerevisiae</i> )                  |   |
| CX3CR1  | Chemokine (C-X3-C motif) receptor 1                                                    |   |
| CXCR5   | Chemokine (C-X-C motif) receptor 5                                                     |   |
| CXorf22 | Chromosome X open reading frame 22                                                     |   |
| CYB561  | Cytochrome b561                                                                        |   |
| CYCSP52 | Cytochrome c, somatic pseudogene 52                                                    |   |
| CYP2F1  | Cytochrome P450, family 2, subfamily F, polypeptide 1                                  |   |
| CYP2U1  | Cytochrome P450, family 2, subfamily U, polypeptide 1                                  |   |
| CYP8B1  | Cytochrome P450, family 8, subfamily B, polypeptide 1                                  |   |
| CYTH2   | Cytohesin 2                                                                            |   |
| D2HGDH  | D-2-hydroxyglutarate dehydrogenase                                                     |   |
| DACT3   | Dishevelled-binding antagonist of beta-catenin 3                                       |   |
| DAG1    | Dystroglycan 1 (dystrophin-associated glycoprotein 1)                                  |   |
| DAGLB   | Diacylglycerol lipase, beta                                                            |   |

|          |                                                                |   |
|----------|----------------------------------------------------------------|---|
| DBNDD1   | Dysbindin (dystrobrevin binding protein 1) domain containing 1 |   |
| DBP      | D site of albumin promoter (albumin D-box) binding protein     |   |
| DCAF11   | DDB1 and CUL4 associated factor 11                             |   |
| DCAF8L1  | DDB1 and CUL4 associated factor 8-like 1                       |   |
| DCLK2    | Doublecortin-like kinase 2                                     |   |
| DCP2     | Decapping mRNA 2                                               |   |
| DDA1     | DET1 and DDB1 associated 1                                     |   |
| DDB2     | Damage-specific DNA binding protein 2, 48kDa                   | √ |
| DDI2     | DNA-damage inducible 1 homolog 2 ( <i>S. cerevisiae</i> )      |   |
| DDX10    | DEAD (Asp-Glu-Ala-Asp) box polypeptide 10                      | √ |
| DDX11L1  | DEAD/H (Asp-Glu-Ala-Asp/His) box helicase 11 like 1            |   |
| DDX11L10 | DEAD/H (Asp-Glu-Ala-Asp/His) box helicase 11 like 10           |   |
| DDX11L11 | DEAD/H box polypeptide 11 like 11                              |   |
| DDX11L2  | DEAD/H (Asp-Glu-Ala-Asp/His) box helicase 11 like 2            |   |
| DDX11L5  | DEAD/H (Asp-Glu-Ala-Asp/His) box helicase 11 like 5            |   |
| DDX11L9  | DEAD/H (Asp-Glu-Ala-Asp/His) box helicase 11 like 9            |   |
| DDX3X    | DEAD (Asp-Glu-Ala-Asp) box helicase 3, X-linked                |   |
| DDX60L   | DEAD (Asp-Glu-Ala-Asp) box polypeptide 60-like                 |   |
| DECR2    | 2,4-dienoyl CoA reductase 2, peroxisomal                       |   |
| DENND1A  | DENN/MADD domain containing 1A                                 |   |
| DEPDC5   | DEP domain containing 5                                        |   |
| DERL3    | Derlin 3                                                       |   |
| DEXI     | Dexi homolog (mouse)                                           |   |
| DGCR5    | DiGeorge syndrome critical region gene 5 (non-protein coding)  |   |
| DGCR6    | DiGeorge syndrome critical region gene 6                       |   |
| DGCR8    | DGCR8 microprocessor complex subunit                           |   |
| DGCR9    | DiGeorge syndrome critical region gene 9 (non-protein coding)  |   |
| DGKB     | Diacylglycerol kinase, beta 90kDa                              |   |
| DGKH     | Diacylglycerol kinase, eta                                     |   |
| DGUOK    | Deoxyguanosine kinase                                          |   |
| DHODH    | Dihydroorotate dehydrogenase (quinone)                         |   |

|         |                                                    |   |
|---------|----------------------------------------------------|---|
| DIDO1   | Death inducer-obliterator 1                        |   |
| DIRAS1  | DIRAS family, GTP-binding RAS-like 1               |   |
| DIS3L2  | DIS3 like 3'-5' exoribonuclease 2                  |   |
| DISC1   | Disrupted in schizophrenia 1                       |   |
| DIXDC1  | DIX domain containing 1                            |   |
| DLAT    | Dihydrolipoamide S-acetyltransferase               |   |
| DLX5    | Distal-less homeobox 5                             |   |
| DMD     | Dystrophin                                         |   |
| DMRT1   | Doublesex and mab-3 related transcription factor 1 |   |
| DNAH14  | Dynein, axonemal, heavy chain 14                   |   |
| DNAI2   | Dynein, axonemal, intermediate chain 2             |   |
| DNAJC10 | DnaJ (Hsp40) homolog, subfamily C, member 10       |   |
| DNAJC16 | DnaJ (Hsp40) homolog, subfamily C, member 16       |   |
| DNM2    | Dynamamin 2                                        | √ |
| DNMT3B  | DNA (cytosine-5-)-methyltransferase 3 beta         |   |
| DOCK2   | Dedicator of cytokinesis 2                         |   |
| DOCK5   | Dedicator of cytokinesis 5                         |   |
| DOPEY1  | Dopey family member 1                              |   |
| DOT1L   | DOT1-like histone H3K79 methyltransferase          |   |
| DPH1    | Diphthamide biosynthesis 1                         |   |
| DPY19L3 | Dpy-19-like 3 (C. elegans)                         |   |
| DRAM1   | DNA-damage regulated autophagy modulator 1         |   |
| DSCC1   | DNA replication and sister chromatid cohesion 1    |   |
| DSG1    | Desmoglein 1                                       |   |
| DSP     | Desmoplakin                                        |   |
| DTYMK   | Deoxythymidylate kinase (thymidylate kinase)       |   |
| DUSP23  | Dual specificity phosphatase 23                    |   |
| DUSP28  | Dual specificity phosphatase 28                    |   |
| DUSP3   | Dual specificity phosphatase 3                     |   |
| DUSP7   | Dual specificity phosphatase 7                     |   |
| DUX4    | Double homeobox 4                                  | √ |



|          |                                                                    |   |
|----------|--------------------------------------------------------------------|---|
| DYDC1    | DPY30 domain containing 1 [ <i>Homo sapiens</i> (human) ]          |   |
| DYNC1LI2 | Dynein, cytoplasmic 1, light intermediate chain 2                  |   |
| DYNLL2   | Dynein, light chain, LC8-type 2                                    |   |
| DYNLRB2  | Dynein, light chain, roadblock-type 2                              |   |
| DYSFIP1  | Protein phosphatase 1, regulatory subunit 27                       |   |
| E2F7     | E2F transcription factor 7                                         |   |
| E2F8     | E2F transcription factor 8                                         |   |
| EBF1     | Early B-cell factor 1                                              | √ |
| EBF2     | Early B-cell factor 2                                              |   |
| EBF3     | Early B-cell factor 3                                              |   |
| ECSIT    | ECSIT signalling integrator                                        |   |
| EDA      | Ectodysplasin A                                                    |   |
| EDC3     | Edc3p                                                              |   |
| EDNRB    | Endothelin receptor type B                                         |   |
| EEF2K    | Eukaryotic elongation factor-2 kinase                              |   |
| EFCAB2   | EF-hand calcium binding domain 2                                   |   |
| EHHADH   | Enoyl-CoA, hydratase/3-hydroxyacyl CoA dehydrogenase               |   |
| EIF2AK1  | Eukaryotic translation initiation factor 2-alpha kinase 1          |   |
| EIF2AK4  | Eukaryotic translation initiation factor 2 alpha kinase 4          |   |
| EIF2S1   | Eukaryotic translation initiation factor 2, subunit 1 alpha, 35kDa |   |
| EIF4A2   | Eukaryotic translation initiation factor 4A2                       | √ |
| EIF4H    | Eukaryotic translation initiation factor 4H                        |   |
| ELAVL3   | ELAV like neuron-specific RNA binding protein 3                    |   |
| ELL      | Elongation factor RNA polymerase II                                | √ |
| ELMOD3   | ELMO/CED-12 domain containing 3                                    |   |
| EMID2    | EMI domain containing 2                                            |   |
| EML1     | Echinoderm microtubule associated protein like 1                   |   |
| EML6     | Echinoderm microtubule associated protein like 6                   |   |
| EMP2     | Epithelial membrane protein 2                                      |   |
| ENDOD1   | Endonuclease domain containing 1                                   |   |
| ENGASE   | Endo-beta-N-acetylglucosaminidase                                  |   |

|          |                                                                   |   |
|----------|-------------------------------------------------------------------|---|
| ENPEP    | Glutamyl aminopeptidase                                           |   |
| ENPP6    | Ectonucleotide pyrophosphatase/phosphodiesterase 6                |   |
| ENTPD6   | Ectonucleoside triphosphate diphosphohydrolase 6 (putative)       |   |
| EPHA10   | EPH receptor A10                                                  |   |
| EPHB1    | EPH receptor B1                                                   |   |
| EPHB6    | EPH receptor B6                                                   |   |
| EPHB6    | EPH receptor B6                                                   |   |
| EPM2A    | Epilepsy, progressive myoclonus type 2A, Lafora disease (laforin) |   |
| EPS8L1   | EPS8-like 1                                                       |   |
| EPYC     | Epiphycan                                                         |   |
| ERBB3    | V-erb-b2 avian erythroblastic leukemia viral oncogene homolog 3   |   |
| ERC1     | ELKS/RAB6-interacting/CAST family member 1                        |   |
| ERICH1   | Glutamate-rich 1                                                  |   |
| ESR2     | Estrogen receptor 2 (ER beta)                                     |   |
| ETF1     | Eukaryotic translation termination factor 1                       |   |
| ETV6     | Ets variant 6                                                     | √ |
| ETV7     | Ets variant 7                                                     |   |
| EVC      | Ellis van Creveld syndrome                                        |   |
| EXOG     | Endo/exonuclease (5'-3'), endonuclease G-like                     |   |
| EXOSC2   | Exosome component 2                                               |   |
| EXOSC8   | Exosome component 8                                               |   |
| EZH2     | Enhancer of zeste 2 polycomb repressive complex 2 subunit         | √ |
| F2R      | Coagulation factor II (thrombin) receptor                         |   |
| FAIM2    | Fas apoptotic inhibitory molecule 2                               |   |
| FAM101B  | Family with sequence similarity 101, member B                     |   |
| FAM103A1 | Family with sequence similarity 103, member A1                    |   |
| FAM104A  | Family with sequence similarity 104, member A                     |   |
| FAM105B  | Family with sequence similarity 105, member B                     |   |
| FAM115A  | Family with sequence similarity 115, member A                     |   |
| FAM117A  | Family with sequence similarity 117, member A                     |   |
| FAM119A  | Family with sequence similarity 119, member A                     |   |

|          |                                                                             |  |
|----------|-----------------------------------------------------------------------------|--|
| FAM120A  | Family with sequence similarity 120, member A                               |  |
| FAM122B  | Family with sequence similarity 122, member B                               |  |
| FAM134A  | Family with sequence similarity 134, member A                               |  |
| FAM13A   | Family with sequence similarity 13, member A                                |  |
| FAM149A  | Family with sequence similarity 149, member A                               |  |
| FAM153B  | Family with sequence similarity 153, member B                               |  |
| FAM160B1 | Family with sequence similarity 160, member B1                              |  |
| FAM160B2 | Family with sequence similarity 160, member B2                              |  |
| FAM178A  | Family with sequence similarity 178, member A                               |  |
| FAM179A  | Family with sequence similarity 179, member A                               |  |
| FAM181B  | Family with sequence similarity 181, member B                               |  |
| FAM189A1 | family with sequence similarity 189, member A1                              |  |
| FAM190A  | Family with sequence similarity 190, member A                               |  |
| FAM196A  | Family with sequence similarity 196, member A                               |  |
| FAM23A   | Transmembrane protein 236                                                   |  |
| FAM23B   | Transmembrane protein 236                                                   |  |
| FAM38B   | Piezo-type mechanosensitive ion channel component 2                         |  |
| FAM57A   | Family with sequence similarity 57, member A                                |  |
| FAM73B   | Family with sequence similarity 73, member B                                |  |
| FAM74A1  | Family with sequence similarity 74, member A1                               |  |
| FAM74A3  | Family with sequence similarity 74, member A3                               |  |
| FAM74A4  | Family with sequence similarity 74, member A4                               |  |
| FAM7A1   | ULK4 pseudogene 1                                                           |  |
| FAM7A2   | ULK4 pseudogene 2                                                           |  |
| FAM7A3   | ULK4 pseudogene 3                                                           |  |
| FAM84B   | Family with sequence similarity 84, member B                                |  |
| FAM99A   | Family with sequence similarity 99, member A (non-protein coding)           |  |
| FARP1    | FERM, RhoGEF (ARHGEF) and pleckstrin domain protein 1 (chondrocyte-derived) |  |
| FBLN1    | Fibulin 1                                                                   |  |
| FBN3     | Fibrillin 3                                                                 |  |
| FBXL18   | F-box and leucine-rich repeat protein 18                                    |  |

|          |                                                                             |  |
|----------|-----------------------------------------------------------------------------|--|
| FBXL2    | F-box and leucine-rich repeat protein 2                                     |  |
| FBXO24   | F-box protein 24                                                            |  |
| FBXO41   | F-box protein 41                                                            |  |
| FBXO43   | F-box protein 43                                                            |  |
| FBXW8    | F-box and WD repeat domain containing 8                                     |  |
| FCGR2C   | Fc fragment of IgG, low affinity IIc, receptor for (CD32) (gene/pseudogene) |  |
| FES      | FES proto-oncogene, tyrosine kinase                                         |  |
| FES      | FES proto-oncogene, tyrosine kinase                                         |  |
| FETUB    | Fetuin B                                                                    |  |
| FFAR3    | Free fatty acid receptor 3                                                  |  |
| FGD2     | FYVE, RhoGEF and PH domain containing 2                                     |  |
| FGF19    | Fibroblast growth factor 19                                                 |  |
| FHAD1    | Forkhead-associated (FHA) phosphopeptide binding domain 1                   |  |
| FIBCD1   | Fibrinogen C domain containing 1                                            |  |
| FJX1     | Four jointed box 1 (Drosophila)                                             |  |
| FKBP9    | FK506 binding protein 9, 63 kDa                                             |  |
| FKTN     | Fukutin                                                                     |  |
| FLJ11292 | Uncharacterized protein FLJ11292                                            |  |
| FLJ16779 | Uncharacterized LOC100192386                                                |  |
| FLJ30679 | Uncharacterized protein FLJ30679                                            |  |
| FLJ30838 | Long intergenic non-protein coding RNA 1122                                 |  |
| FLJ30901 | Uncharacterized protein FLJ30901                                            |  |
| FLJ33581 | Uncharacterized LOC400839                                                   |  |
| FLJ39582 | Uncharacterized protein FLJ39582-like                                       |  |
| FLJ39824 | Hypothetical LOC441173                                                      |  |
| FLJ41484 | GAS6 antisense RNA 1                                                        |  |
| FLJ41484 | GAS6 antisense RNA 1                                                        |  |
| FLJ42280 | Putative uncharacterized protein FLJ42280 +B622                             |  |
| FLJ44054 | Long intergenic non-protein coding RNA 452                                  |  |
| FLJ44635 | TPT1-like protein                                                           |  |
| FLJ45340 | Long intergenic non-protein coding RNA 1000                                 |  |

|          |                                                          |   |
|----------|----------------------------------------------------------|---|
| FLJ46361 | Deleted in malignant brain tumors 1 pseudogene 1         |   |
| FLJ90757 | BAIAP2 antisense RNA 1                                   |   |
| FLRT1    | Fibronectin leucine rich transmembrane protein 1         |   |
| FLT1     | Fms-related tyrosine kinase 1                            |   |
| FLYWCH1  | FLYWCH-type zinc finger 1                                |   |
| FNTB     | Farnesyltransferase, CAAX box, beta                      |   |
| FOSB     | FBJ murine osteosarcoma viral oncogene homolog B         |   |
| FOXE1    | Forkhead box E1 (thyroid transcription factor 2)         |   |
| FOXF2    | Forkhead box F2                                          |   |
| FOXK2    | Forkhead box K2                                          |   |
| FOXN3    | Forkhead box N3                                          |   |
| FOXN4    | Forkhead box N4                                          |   |
| FOXO3    | Forkhead box O3                                          |   |
| FOXP1    | Forkhead box P1                                          | √ |
| FRAT2    | Frequently rearranged in advanced T-cell lymphomas 2     |   |
| FREM2    | FRAS1 related extracellular matrix protein 2             |   |
| FRMPD4   | FERM and PDZ domain containing 4                         |   |
| FRY      | Furry homolog (Drosophila)                               |   |
| FSIP2    | Fibrous sheath interacting protein 2                     |   |
| FSTL1    | Follistatin-like 1                                       |   |
| FUT2     | Fucosyltransferase 2 (secretor status included)          |   |
| FUT5     | Fucosyltransferase 5 (alpha (1,3) fucosyltransferase)    |   |
| FUT8     | Fucosyltransferase 8 (alpha (1,6) fucosyltransferase)    |   |
| FXYD1    | FXYD domain containing ion transport regulator 1         |   |
| FYTTD1   | Forty-two-three domain containing 1                      |   |
| G3BP2    | GTPase activating protein (SH3 domain) binding protein 2 |   |
| GABBR1   | Gamma-aminobutyric acid (GABA) B receptor, 1             |   |
| GABRB2   | Gamma-aminobutyric acid (GABA) A receptor, beta 2        |   |
| GADD45B  | Growth arrest and DNA-damage-inducible, beta             |   |
| GALNT13  | Polypeptide N-acetylgalactosaminyltransferase 13         |   |
| GALNT5   | Polypeptide N-acetylgalactosaminyltransferase 5          |   |

|         |                                                                                         |   |
|---------|-----------------------------------------------------------------------------------------|---|
| GALNT6  | Polypeptide N-acetylgalactosaminyltransferase 6                                         |   |
| GALNTL1 | UDP-N-acetyl-alpha-D-galactosamine:polypeptide N-acetylgalactosaminyltransferase-like 1 |   |
| GAPT    | GRB2-binding adaptor protein, transmembrane                                             |   |
| GAS7    | Growth arrest-specific 7                                                                | √ |
| GATA3   | GATA binding protein 3                                                                  | √ |
| GATAD2A | GATA zinc finger domain containing 2A                                                   |   |
| GCNT1   | Glucosaminyl (N-acetyl) transferase 1, core 2                                           |   |
| GCSH    | Glycine cleavage system protein H (aminomethyl carrier)                                 |   |
| GDAP1L1 | Ganglioside induced differentiation associated protein 1-like 1                         |   |
| GDI1    | GDP dissociation inhibitor 1                                                            |   |
| GFM1    | G elongation factor, mitochondrial 1                                                    |   |
| GHDC    | GH3 domain containing                                                                   |   |
| GHR     | Growth hormone receptor                                                                 |   |
| GIGYF2  | GRB10 interacting GYF protein 2                                                         |   |
| GINS1   | GINS complex subunit 1 (Psf1 homolog)                                                   |   |
| GIPC1   | GIPC PDZ domain containing family, member 1                                             |   |
| GJA3    | Gap junction protein, alpha 3, 46kDa                                                    |   |
| GJD3    | Gap junction protein, delta 3, 31.9kDa                                                  |   |
| GK5     | Glycerol kinase 5 (putative)                                                            |   |
| GLB1L2  | Galactosidase, beta 1-like 2                                                            |   |
| GLIPR2  | GLI pathogenesis-related 2                                                              |   |
| GLP1R   | Glucagon-like peptide 1 receptor                                                        |   |
| GLS     | Glutaminase                                                                             |   |
| GLYCK   | Glycerate kinase                                                                        |   |
| GNA11   | Guanine nucleotide binding protein (G protein), alpha 11 (Gq class)                     | √ |
| GNAO1   | Guanine nucleotide binding protein (G protein), alpha activating activity polypeptide O |   |
| GNAS    | GNAS complex locus                                                                      | √ |
| GNG2    | Guanine nucleotide binding protein (G protein), gamma 2                                 |   |
| GNG4    | Guanine nucleotide binding protein (G protein), gamma 4                                 |   |
| GOLGA1  | Golgin A1                                                                               |   |
| GOLGA7B | Golgin A7 family, member B                                                              |   |

|          |                                                               |  |
|----------|---------------------------------------------------------------|--|
| GOLGA8C  | Golgin A8 family, member C, pseudogene                        |  |
| GOLGA8DP | Golgin A8 family, member D, pseudogene                        |  |
| GOLGA8E  | Golgin A8 family, member E, pseudogene                        |  |
| GOLGA8F  | Golgin A8 family, member F                                    |  |
| GOLGA8G  | Golgin A8 family, member G                                    |  |
| GOLT1A   | Golgi transport 1A                                            |  |
| GORAB    | Golgin, RAB6-interacting                                      |  |
| GPBP1    | GC-rich promoter binding protein 1                            |  |
| GPD1     | Glycerol-3-phosphate dehydrogenase 1 (soluble)                |  |
| GPN1     | GPN-loop GTPase 1                                             |  |
| GPR107   | G protein-coupled receptor 107                                |  |
| GPR111   | G protein-coupled receptor 111                                |  |
| GPR123   | G protein-coupled receptor 123                                |  |
| GPR124   | G protein-coupled receptor 124                                |  |
| GPR144   | G protein-coupled receptor 144                                |  |
| GPR179   | G protein-coupled receptor 179                                |  |
| GPR20    | G protein-coupled receptor 20                                 |  |
| GPRIN2   | G protein regulated inducer of neurite outgrowth 2            |  |
| GRAMD1C  | GRAM domain containing 1C                                     |  |
| GRAMD3   | GRAM domain containing 3                                      |  |
| GRB2     | Growth factor receptor-bound protein 2                        |  |
| GREB1    | Growth regulation by estrogen in breast cancer 1              |  |
| GRHL3    | Grainyhead-like 3 (Drosophila)                                |  |
| GRIA1    | Glutamate receptor, ionotropic, AMPA 1                        |  |
| GRIP2    | Glutamate receptor interacting protein 2                      |  |
| GRK1     | G protein-coupled receptor kinase 1                           |  |
| GRM7     | Glutamate receptor, metabotropic 7                            |  |
| GSK3B    | Glycogen synthase kinase 3 beta                               |  |
| GTDC1    | Glycosyltransferase-like domain containing 1                  |  |
| GTF2H2B  | General transcription factor IIH, polypeptide 2B (pseudogene) |  |
| GTF2H5   | General transcription factor IIH, polypeptide 5               |  |

|           |                                                       |   |
|-----------|-------------------------------------------------------|---|
| GTF2IRD1  | GTF2I repeat domain containing 1                      |   |
| GTPBP1    | GTP binding protein 1                                 |   |
| GTSE1     | G-2 and S-phase expressed 1                           |   |
| GYG2      | Glycogenin 2                                          |   |
| GYPC      | Glycophorin C (Gerbich blood group)                   |   |
| H1F0      | H1 histone family, member 0                           |   |
| H1FX      | H1 histone family, member X                           |   |
| H2AFV     | H2A histone family, member V                          |   |
| H2AFY     | H2A histone family, member Y                          |   |
| HAAO      | 3-Hydroxyanthranilate 3,4-dioxygenase                 |   |
| HABP2     | Hyaluronan binding protein 2                          |   |
| HBEGF     | Heparin-binding EGF-like growth factor                |   |
| HBS1L     | HBS1-like translational GTPase                        |   |
| HCG27     | HLA complex group 27 (non-protein coding)             |   |
| HDAC4     | Histone deacetylase 4                                 |   |
| HDAC6     | Histone deacetylase 6                                 |   |
| HDGFRP2   | Hepatoma-derived growth factor-related protein 2      |   |
| HDLBP     | High density lipoprotein binding protein              |   |
| HEATR2    | HEAT repeat containing 2                              |   |
| HELLS     | Helicase, lymphoid-specific                           |   |
| HEXA      | Hexosaminidase A (alpha polypeptide)                  |   |
| HEXIM1    | Hexamethylene bis-acetamide inducible 1               |   |
| HHIP      | Hedgehog interacting protein                          |   |
| HIF3A     | Hypoxia inducible factor 3, alpha subunit             |   |
| HINT2     | Histidine triad nucleotide binding protein 2          |   |
| HIP1      | Huntingtin interacting protein 1                      | √ |
| HIST2H2BE | Histone cluster 2, H2be                               |   |
| HLA-A     | Major histocompatibility complex, class I, A          |   |
| HLA-DMB   | Major histocompatibility complex, class II, DM beta   |   |
| HLA-DOB   | Major histocompatibility complex, class II, DO beta   |   |
| HLA-DPB1  | Major histocompatibility complex, class II, DP beta 1 |   |



|         |                                                                              |  |
|---------|------------------------------------------------------------------------------|--|
| HLA-J   | Major histocompatibility complex, class I, J (pseudogene)                    |  |
| HLA-L   | Major histocompatibility complex, class I, L (pseudogene)                    |  |
| HMBOX1  | Homeobox containing 1                                                        |  |
| HMGCL   | 3-hydroxymethyl-3-methylglutaryl-CoA lyase                                   |  |
| HOXC4   | Homeobox C4                                                                  |  |
| HPCAL1  | Hippocalcin-like 1                                                           |  |
| HPS1    | Hermansky-Pudlak syndrome 1                                                  |  |
| HRH1    | Histamine receptor H1                                                        |  |
| HSD17B1 | Hydroxysteroid (17-beta) dehydrogenase 1                                     |  |
| HSD3B7  | Hydroxy-delta-5-steroid dehydrogenase, 3 beta- and steroid delta-isomerase 7 |  |
| HSFX1   | Heat shock transcription factor family, X linked 1                           |  |
| HSPA14  | Heat shock 70kDa protein 14                                                  |  |
| HSPG2   | Heparan sulfate proteoglycan 2                                               |  |
| HUWE1   | HECT, UBA and WWE domain containing 1, E3 ubiquitin protein ligase           |  |
| IARS    | Isoleucyl-tRNA synthetase                                                    |  |
| IDS     | Iduronate 2-sulfatase                                                        |  |
| IFIT2   | Interferon-induced protein with tetratricopeptide repeats 2                  |  |
| IFNAR1  | Interferon (alpha, beta and omega) receptor 1                                |  |
| IGF1R   | Insulin-like growth factor 1 receptor                                        |  |
| IGFBP5  | Insulin-like growth factor binding protein 5                                 |  |
| IGHMBP2 | Immunoglobulin mu binding protein 2                                          |  |
| IGSF5   | Immunoglobulin superfamily, member 5                                         |  |
| IKBKB   | Inhibitor of kappa light polypeptide gene enhancer in B-cells, kinase beta   |  |
| IKZF1   | IKAROS family zinc finger 1 (Ikaros)                                         |  |
| IL15    | Interleukin 15                                                               |  |
| IL16    | Interleukin 16                                                               |  |
| IL17D   | Interleukin 17D                                                              |  |
| IL17RE  | Interleukin 17 receptor E                                                    |  |
| IL1F9   | Interleukin 1 family, member 9                                               |  |
| IL1RN   | Interleukin 1 receptor antagonist                                            |  |
| IL27    | Interleukin 27                                                               |  |

|         |                                                                                                     |  |
|---------|-----------------------------------------------------------------------------------------------------|--|
| ING5    | Inhibitor of growth family, member 5                                                                |  |
| INMT    | Indolethylamine N-methyltransferase                                                                 |  |
| INTS1   | Integrator complex subunit 1                                                                        |  |
| INTU    | Inturned planar cell polarity protein                                                               |  |
| IPO8    | Importin 8                                                                                          |  |
| IQCE    | IQ motif containing E                                                                               |  |
| ISCU    | Iron-sulfur cluster assembly enzyme                                                                 |  |
| ISG20   | Interferon stimulated exonuclease gene 20kDa                                                        |  |
| ISPD    | Isoprenoid synthase domain containing                                                               |  |
| ITFG3   | Integrin alpha FG-GAP repeat containing 3                                                           |  |
| ITGA2   | Integrin, alpha 2 (CD49B, alpha 2 subunit of VLA-2 receptor)                                        |  |
| ITGA7   | Integrin, alpha 7                                                                                   |  |
| ITGA9   | Integrin, alpha 9                                                                                   |  |
| ITIH1   | Inter-alpha-trypsin inhibitor heavy chain 1                                                         |  |
| ITPK1   | Inositol-tetrakisphosphate 1-kinase                                                                 |  |
| JAKMIP1 | Janus kinase and microtubule interacting protein 1                                                  |  |
| JMJD5   | lysine (K)-specific demethylase 8                                                                   |  |
| JMJD6   | Jumonji domain containing 6                                                                         |  |
| JRK     | Jrk homolog (mouse)                                                                                 |  |
| JUP     | Junction plakoglobin                                                                                |  |
| KANK1   | KN motif and ankyrin repeat domains 1                                                               |  |
| KANK4   | KN motif and ankyrin repeat domains 4                                                               |  |
| KAZ     | Kazrin, periplakin interacting protein                                                              |  |
| KBTBD5  | Kelch-like family member 40                                                                         |  |
| KCNA1   | Potassium voltage-gated channel, shaker-related subfamily, member 1 (episodic ataxia with myokymia) |  |
| KCNC1   | Potassium voltage-gated channel, Shaw-related subfamily, member 1                                   |  |
| KCNE4   | Potassium voltage-gated channel, Isk-related family, member 4                                       |  |
| KCNE4   | Potassium voltage-gated channel, Isk-related family, member 4                                       |  |
| KCNG3   | Potassium voltage-gated channel, subfamily G, member 3                                              |  |
| KCNJ2   | Potassium inwardly-rectifying channel, subfamily J, member 2                                        |  |
| KCNK2   | Potassium channel, subfamily K, member 2                                                            |  |

|           |                                                                                           |  |
|-----------|-------------------------------------------------------------------------------------------|--|
| KCNMA1    | Potassium large conductance calcium-activated channel, subfamily M, alpha member 1        |  |
| KCNN2     | Potassium intermediate/small conductance calcium-activated channel, subfamily N, member 2 |  |
| KCNN3     | Potassium intermediate/small conductance calcium-activated channel, subfamily N, member 3 |  |
| KCNS2     | Potassium voltage-gated channel, delayed-rectifier, subfamily S, member 2                 |  |
| KCNU1     | Potassium channel, subfamily U, member 1                                                  |  |
| KCTD12    | Potassium channel tetramerization domain containing 12                                    |  |
| KCTD2     | Potassium channel tetramerization domain containing 2                                     |  |
| KCTD8     | Potassium channel tetramerization domain containing 8                                     |  |
| KDEL2     | KDEL (Lys-Asp-Glu-Leu) endoplasmic reticulum protein retention receptor 2                 |  |
| KDM4B     | Lysine (K)-specific demethylase 4B                                                        |  |
| KDM4C     | Lysine (K)-specific demethylase 4C                                                        |  |
| KGFLP1    | Fibroblast growth factor 7 pseudogene                                                     |  |
| KHNYN     | KH and NYN domain containing                                                              |  |
| KHSRP     | KH-type splicing regulatory protein                                                       |  |
| KIAA0125  | KIAA0125                                                                                  |  |
| KIAA0182  | Gse1 coiled-coil protein                                                                  |  |
| KIAA0319L | KIAA0319-like                                                                             |  |
| KIAA0355  | KIAA0355                                                                                  |  |
| KIAA0430  | KIAA0430                                                                                  |  |
| KIAA0513  | KIAA0513                                                                                  |  |
| KIAA0776  | UFM1-specific ligase 1                                                                    |  |
| KIAA1715  | KIAA1715                                                                                  |  |
| KIAA1908  | PSMG3 antisense RNA 1                                                                     |  |
| KIF11     | Kinesin family member 11                                                                  |  |
| KIF13A    | Kinesin family member 13A                                                                 |  |
| KIF21B    | Kinesin family member 21B                                                                 |  |
| KIF26A    | Kinesin family member 26A                                                                 |  |
| KIF3B     | Kinesin family member 3B                                                                  |  |
| KLF12     | Kruppel-like factor 12                                                                    |  |
| KLF13     | Kruppel-like factor 13                                                                    |  |
| KLF17     | Kruppel-like factor 17                                                                    |  |

|                 |                                                              |  |
|-----------------|--------------------------------------------------------------|--|
| KLF3            | Kruppel-like factor 3 (basic)                                |  |
| KLHDC10         | Kelch domain containing 10                                   |  |
| KLHL18          | Kelch-like family member 18                                  |  |
| KLHL29          | Kelch-like family member 29                                  |  |
| KLHL30          | Kelch-like family member 30                                  |  |
| KLRAQ1          | Protein phosphatase 1, regulatory subunit 21                 |  |
| KREMEN1         | Kringle containing transmembrane protein 1                   |  |
| KRT14           | Keratin 14                                                   |  |
| KRT33B          | Keratin 33B                                                  |  |
| KRT8P12         | Keratin 8 pseudogene 12                                      |  |
| KSR2            | Kinase suppressor of ras 2                                   |  |
| KTELC1          | Protein O-glycosyltransferase 1                              |  |
| L3MBTL          | L(3)mbt-like 1 (Drosophila)                                  |  |
| LALBA           | Lactalbumin, alpha-                                          |  |
| LARGE           | Like-glycosyltransferase                                     |  |
| LASP1           | LIM and SH3 protein 1                                        |  |
| LASS1           | Ceramide synthase 1                                          |  |
| LCLAT1          | Lysocardiolipin acyltransferase 1                            |  |
| LDLRAD2         | Low density lipoprotein receptor class A domain containing 2 |  |
| LDLRAD3         | Low density lipoprotein receptor class A domain containing 3 |  |
| LETM2           | Leucine zipper-EF-hand containing transmembrane protein 2    |  |
| LHX6            | LIM homeobox 6                                               |  |
| LIG4            | Ligase IV, DNA, ATP-dependent                                |  |
| LIMK1           | LIM domain kinase 1                                          |  |
| LIMK2           | LIM domain kinase 2                                          |  |
| LIMS3           | LIM and senescent cell antigen-like domains 3                |  |
| LIMS3-LOC440895 | LIMS3-LOC440895 readthrough                                  |  |
| LINGO1          | Leucine rich repeat and Ig domain containing 1               |  |
| LMAN2L          | Lectin, mannose-binding 2-like                               |  |
| LMBR1           | Limb development membrane protein 1                          |  |
| LMNA            | Lamin A/C                                                    |  |

|              |                                                   |   |
|--------------|---------------------------------------------------|---|
| LMO1         | LIM domain only 1 (rhombotin 1)                   | √ |
| LMO3         | LIM domain only 3 (rhombotin-like 2)              |   |
| LNP1         | Leukemia NUP98 fusion partner 1                   |   |
| LOC100125918 | Uncharacterized LOC100125918                      |   |
| LOC100128126 | STAU2 antisense RNA 1                             |   |
| LOC100128554 | Uncharacterized LOC100128554                      |   |
| LOC100129196 | MATN1 antisense RNA 1                             |   |
| LOC100129250 | TOPORS antisense RNA 1                            |   |
| LOC100129716 | ARRDC3 antisense RNA 1                            |   |
| LOC100129826 | Uncharacterized LOC100129826                      |   |
| LOC100130238 | Uncharacterized LOC100130238                      |   |
| LOC100130331 | POTE ankyrin domain family, member F pseudogene   |   |
| LOC100130353 | Hippocampus abundant transcript-like 1 pseudogene |   |
| LOC100130386 | Long intergenic non-protein coding RNA 552        |   |
| LOC100130776 | AGAP2 antisense RNA 1                             |   |
| LOC100130987 | Uncharacterized LOC100130987                      |   |
| LOC100131347 | RAD52 motif containing 1 pseudogene               |   |
| LOC100131530 | Uncharacterized LOC100131530                      |   |
| LOC100132062 | Uncharacterized LOC100132062                      |   |
| LOC100132832 | Postmeiotic segregation increased 2 pseudogene 9  |   |
| LOC100132984 |                                                   |   |
| LOC100133029 | Sirtuin 5 pseudogene                              |   |
| LOC100133091 | Uncharacterized LOC100133091                      |   |
| LOC100133161 | Long intergenic non-protein coding RNA 1001       |   |
| LOC100133331 | Uncharacterized LOC100133331                      |   |
| LOC100133612 | Long intergenic non-protein coding RNA 1134       |   |
| LOC100134040 | Uncharacterized LOC100134040                      |   |
| LOC100134229 | JHDM1D antisense RNA 1 (head to head)             |   |
| LOC100147773 | Uncharacterized LOC100147773                      |   |
| LOC100287290 | Cytokine receptor CRL2                            |   |
| LOC100288346 | NCAM1 antisense RNA1                              |   |

|              |                                                                                             |  |
|--------------|---------------------------------------------------------------------------------------------|--|
| LOC100289580 | Uncharacterized LOC100289580                                                                |  |
| LOC100302401 | RASAL2 antisense RNA 1                                                                      |  |
| LOC126536    | Long intergenic non-protein coding RNA 661                                                  |  |
| LOC143188    | Uncharacterized LOC143188                                                                   |  |
| LOC145820    | Long intergenic non-protein coding RNA 924                                                  |  |
| LOC149773    | APCDD1L antisense RNA 1 (head to head)                                                      |  |
| LOC150381    | PRR34 antisense RNA 1                                                                       |  |
| LOC150776    | Sphingomyelin phosphodiesterase 4, neutral membrane (neutral sphingomyelinase-3) pseudogene |  |
| LOC152217    | NCBP2 antisense RNA 2 (head to head)                                                        |  |
| LOC152225    | Uncharacterized LOC152225                                                                   |  |
| LOC157273    | Uncharacterized LOC157273                                                                   |  |
| LOC255025    | Long intergenic non-protein coding RNA 879                                                  |  |
| LOC255411    | Long intergenic non-protein coding RNA 935                                                  |  |
| LOC256880    | Uncharacterized LOC256880                                                                   |  |
| LOC26102     | Uncharacterized LOC26102                                                                    |  |
| LOC283887    | Uncharacterized LOC283887                                                                   |  |
| LOC284294    | Uncharacterized LOC284294                                                                   |  |
| LOC284581    | Uncharacterized LOC284581                                                                   |  |
| LOC284628    | Uncharacterized LOC284628                                                                   |  |
| LOC284632    | Uncharacterized LOC284632                                                                   |  |
| LOC284749    | Long intergenic non-protein coding RNA 494                                                  |  |
| LOC284926    | Uncharacterized LOC284926                                                                   |  |
| LOC285205    | Long intergenic non-protein coding RNA 636                                                  |  |
| LOC285593    | Uncharacterized LOC285593                                                                   |  |
| LOC286299    | Uncharacterized LOC286299                                                                   |  |
| LOC338797    | Uncharacterized LOC338797                                                                   |  |
| LOC339240    | Keratin 17 pseudogene 5                                                                     |  |
| LOC340074    | Uncharacterized LOC340074                                                                   |  |
| LOC341056    | SUMO1 activating enzyme subunit 1 pseudogene                                                |  |
| LOC344887    | NmrA-like family domain containing 1 pseudogene                                             |  |
| LOC348021    | Long intergenic non-protein coding RNA 442                                                  |  |

|           |                                                                                                       |  |
|-----------|-------------------------------------------------------------------------------------------------------|--|
| LOC349114 | Similar to hypothetical protein LOC349114                                                             |  |
| LOC374491 | Transmembrane phosphoinositide 3-phosphatase and tensin homolog 2 pseudogene 6                        |  |
| LOC387646 | Leucine rich repeat containing 37, member A6, pseudogene                                              |  |
| LOC388692 | Uncharacterized LOC388692                                                                             |  |
| LOC388692 | Uncharacterized LOC388692                                                                             |  |
| LOC388889 | Hypothetical LOC388889                                                                                |  |
| LOC390940 | Phospholipase A2 inhibitor and LY6/PLAUR domain containing                                            |  |
| LOC392232 | Transient receptor potential cation channel, subfamily A, member 1 pseudogene                         |  |
| LOC399744 | Long intergenic non-protein coding RNA 999                                                            |  |
| LOC400553 | Uncharacterized LOC400553                                                                             |  |
| LOC400707 | Uncharacterized LOC400707                                                                             |  |
| LOC400804 | Uncharacterized LOC400804                                                                             |  |
| LOC400891 | Leucine rich repeat containing 74B                                                                    |  |
| LOC400931 | MIRLET7B host gene (non-protein coding)                                                               |  |
| LOC401296 | Uncharacterized LOC401296                                                                             |  |
| LOC401463 | Uncharacterized LOC401463                                                                             |  |
| LOC401589 | Uncharacterized LOC401589                                                                             |  |
| LOC440248 | Hect domain and RLD 2 pseudogene 9                                                                    |  |
| LOC440297 | Chondroitin sulfate proteoglycan 4 pseudogene 8                                                       |  |
| LOC440356 | CDIPT antisense RNA 1 (head to head)                                                                  |  |
| LOC440792 | Proline dehydrogenase (oxidase) 1 pseudogene                                                          |  |
| LOC440926 | H3 histone, family 3A, pseudogene 4                                                                   |  |
| LOC440993 | Long intergenic non-protein coding RNA 969                                                            |  |
| LOC441046 | Glucuronidase, beta pseudogene 5                                                                      |  |
| LOC550643 | Long intergenic non-protein coding RNA 1420                                                           |  |
| LOC619207 | Scavenger receptor protein family member                                                              |  |
| LOC63930  | Uncharacterized LOC63930                                                                              |  |
| LOC641515 | Alpha-1,3-mannosyl-glycoprotein 4-beta-N-acetylglucosaminyltransferase-like protein LOC641515 homolog |  |
| LOC642852 | Uncharacterized LOC642852                                                                             |  |
| LOC643008 | Small integral membrane protein 5                                                                     |  |
| LOC643387 | TAR DNA binding protein pseudogene                                                                    |  |

|           |                                                                     |   |
|-----------|---------------------------------------------------------------------|---|
| LOC643401 | Long intergenic non-protein coding RNA 1021                         |   |
| LOC643529 | Long intergenic non-protein coding RNA 865                          |   |
| LOC644090 | Uncharacterized LOC644090                                           |   |
| LOC645195 | Uncharacterized LOC645195                                           |   |
| LOC647288 | CTAGE family, member 11, pseudogene                                 |   |
| LOC647979 | Long intergenic non-protein coding RNA 657                          |   |
| LOC650368 | Tumor suppressing subtransferable candidate 2 pseudogene            |   |
| LOC651250 | Leucine rich repeat containing 37, member A16, pseudogene           |   |
| LOC728537 | Long intergenic non-protein coding RNA 1125                         |   |
| LOC729603 | Calcineurin-like EF-hand protein 1 pseudogene                       |   |
| LOC730101 | Uncharacterized LOC730101                                           |   |
| LOC84740  | AFAP1 antisense RNA 1                                               |   |
| LOR       | Loricrin                                                            |   |
| LPIN3     | Lipin 3                                                             |   |
| LPP       | LIM domain containing preferred translocation partner in lipoma     | √ |
| LPPR2     | Lipid phosphate phosphatase-related protein type 2                  |   |
| LRCH1     | Leucine-rich repeats and calponin homology (CH) domain containing 1 |   |
| LRG1      | Leucine-rich alpha-2-glycoprotein 1                                 |   |
| LRP6      | Low density lipoprotein receptor-related protein 6                  |   |
| LRRC14    | Leucine rich repeat containing 14                                   |   |
| LRRC15    | Leucine rich repeat containing 15                                   |   |
| LRRC27    | Leucine rich repeat containing 27                                   |   |
| LRRC3B    | Leucine rich repeat containing 3B                                   |   |
| LRRFIP1   | Leucine rich repeat (in FLII) interacting protein 1                 |   |
| LRRIQ1    | Leucine-rich repeats and IQ motif containing 1                      |   |
| LRRK1     | Leucine-rich repeat kinase 1                                        |   |
| LRTM2     | Leucine-rich repeats and transmembrane domains 2                    |   |
| LRWD1     | Leucine-rich repeats and WD repeat domain containing 1              |   |
| LSG1      | Large 60S subunit nuclear export GTPase 1                           |   |
| LSM14B    | LSM14B, SCD6 homolog B ( <i>S. cerevisiae</i> )                     |   |
| LSMD1     | LSM domain containing 1                                             |   |



|          |                                                                             |   |
|----------|-----------------------------------------------------------------------------|---|
| LTBP2    | Latent transforming growth factor beta binding protein 2                    |   |
| LY6E     | Lymphocyte antigen 6 complex, locus E                                       |   |
| LY6K     | Lymphocyte antigen 6 complex, locus K                                       |   |
| LY9      | Lymphocyte antigen 9                                                        |   |
| LYNX1    | Ly6/neurotoxin 1                                                            |   |
| LYPD6    | LY6/PLAUR domain containing 6                                               |   |
| LYSMD4   | LysM, putative peptidoglycan-binding, domain containing 4                   |   |
| LYST     | Lysosomal trafficking regulator                                             |   |
| MACC1    | Metastasis associated in colon cancer 1                                     |   |
| MAFG     | V-maf avian musculoaponeurotic fibrosarcoma oncogene homolog G              |   |
| MAGI1    | Membrane associated guanylate kinase, WW and PDZ domain containing 1        |   |
| MAK      | Male germ cell-associated kinase                                            |   |
| MALAT1   | Metastasis associated lung adenocarcinoma transcript 1 (non-protein coding) | √ |
| MAMLD1   | Mastermind-like domain containing 1                                         |   |
| MAN1B1   | Mannosidase, alpha, class 1B, member 1                                      |   |
| MAN2A2   | Mannosidase, alpha, class 2A, member 2                                      |   |
| MAN2B2   | Mannosidase, alpha, class 2B, member 2                                      |   |
| MAOB     | Monoamine oxidase B                                                         |   |
| MAP2K7   | Mitogen-activated protein kinase kinase 7                                   |   |
| MAP3K2   | Mitogen-activated protein kinase kinase kinase 2                            |   |
| MAP3K5   | Mitogen-activated protein kinase kinase kinase 5                            |   |
| MAP6D1   | MAP6 domain containing 1                                                    |   |
| MAPK12   | Mitogen-activated protein kinase 12                                         |   |
| MAPRE2   | Microtubule-associated protein, RP/EB family, member 2                      |   |
| MARK2    | MAP/microtubule affinity-regulating kinase 2                                |   |
| MARVELD2 | MARVEL domain containing 2                                                  |   |
| MAST1    | Microtubule associated serine/threonine kinase 1                            |   |
| MAST3    | Microtubule associated serine/threonine kinase 3                            |   |
| MASTL    | Microtubule associated serine/threonine kinase-like                         |   |
| MAX      | MYC associated factor X                                                     | √ |
| MBD5     | Methyl-CpG binding domain protein 5                                         |   |

|          |                                                                                         |  |
|----------|-----------------------------------------------------------------------------------------|--|
| MBNL1    | Muscleblind-like splicing regulator 1                                                   |  |
| MBP      | Myelin basic protein                                                                    |  |
| MCART3P  | Solute carrier family 25, member 51 pseudogene 1                                        |  |
| MCHR1    | Melanin-concentrating hormone receptor 1                                                |  |
| MCM5     | Minichromosome maintenance complex component 5                                          |  |
| MCTS1    | Malignant T cell amplified sequence 1                                                   |  |
| MDGA1    | MAM domain containing glycosylphosphatidylinositol anchor 1                             |  |
| MECP2    | Methyl CpG binding protein 2                                                            |  |
| MED1     | Mediator complex subunit 1                                                              |  |
| MED25    | Mediator complex subunit 25                                                             |  |
| MED27    | Mediator complex subunit 27                                                             |  |
| MED28    | Mediator complex subunit 28                                                             |  |
| MEG8     | Maternally expressed 8 (non-protein coding)                                             |  |
| MEGF8    | Multiple EGF-like-domains 8                                                             |  |
| METAP2   | Methionyl aminopeptidase 2                                                              |  |
| METT10D  | Methyltransferase like 16                                                               |  |
| MFAP3    | Microfibrillar-associated protein 3                                                     |  |
| MFRP     | Membrane frizzled-related protein                                                       |  |
| MFSD7    | Major facilitator superfamily domain containing 7                                       |  |
| MGA      | MGA, MAX dimerization protein                                                           |  |
| MGAT5B   | Mannosyl (alpha-1,6-)-glycoprotein beta-1,6-N-acetyl-glucosaminyltransferase, isozyme B |  |
| MGC12916 | Uncharacterized protein MGC12916                                                        |  |
| MGC23284 | SNAI3 antisense RNA 1                                                                   |  |
| MGC2752  | CENPBD1 pseudogene 1                                                                    |  |
| MGC34034 | Long intergenic non-protein coding RNA 1312                                             |  |
| MGLL     | Monoglyceride lipase                                                                    |  |
| MIA      | Melanoma inhibitory activity                                                            |  |
| MIAT     | Myocardial infarction associated transcript (non-protein coding)                        |  |
| MICAL3   | Microtubule associated monooxygenase, calponin and LIM domain containing 3              |  |
| MID1     | Midline 1                                                                               |  |
| MID2     | Midline 2                                                                               |  |

|          |                                                                                                |   |
|----------|------------------------------------------------------------------------------------------------|---|
| MIER1    | Mesoderm induction early response 1, transcriptional regulator                                 |   |
| MKI67IP  | Nucleolar protein interacting with the FHA domain of MKI67                                     |   |
| MKL1     | Megakaryoblastic leukemia (translocation) 1                                                    | √ |
| MKNK2    | MAP kinase interacting serine/threonine kinase 2                                               |   |
| MKX      | Mohawk homeobox                                                                                |   |
| MLEC     | Malectin                                                                                       |   |
| MLL3     | Lysine (K)-specific methyltransferase 2C                                                       | √ |
| MLL5     | Lysine (K)-specific methyltransferase 2E                                                       |   |
| MLLT1    | myeloid/lymphoid or mixed-lineage leukemia (trithorax homolog, Drosophila); translocated to, 1 | √ |
| MLXIP    | MLX interacting protein                                                                        |   |
| MLYCD    | Malonyl-CoA decarboxylase                                                                      |   |
| MMAB     | Methylmalonic aciduria (cobalamin deficiency) cblB type                                        |   |
| MMP11    | Matrix metalloproteinase 11 (stromelysin 3)                                                    |   |
| MMP25    | Matrix metalloproteinase 25                                                                    |   |
| MN1      | Meningioma (disrupted in balanced translocation) 1                                             | √ |
| MNT      | MAX network transcriptional repressor                                                          |   |
| MNX1     | Motor neuron and pancreas homeobox 1                                                           |   |
| MOBKL1A  | MOB kinase activator 1B                                                                        |   |
| MORN1    | MORN repeat containing 1                                                                       |   |
| MPHOSPH6 | M-phase phosphoprotein 6                                                                       |   |
| MPI      | Mannose phosphate isomerase                                                                    |   |
| MPP4     | Membrane protein, palmitoylated 4 (MAGUK p55 subfamily member 4)                               |   |
| MPST     | Mercaptopyruvate sulfurtransferase                                                             |   |
| MPZL1    | Myelin protein zero-like 1                                                                     |   |
| MPZL3    | Myelin protein zero-like 3                                                                     |   |
| MREG     | Melanoregulin                                                                                  |   |
| MRPS11   | Mitochondrial ribosomal protein S11                                                            |   |
| MRPS18A  | Mitochondrial ribosomal protein S18A                                                           |   |
| MRPS35   | Mitochondrial ribosomal protein S35                                                            |   |
| MS4A10   | Membrane-spanning 4-domains, subfamily A, member 10                                            |   |
| MS4A2    | Membrane-spanning 4-domains, subfamily A, member 2                                             |   |

|           |                                                                       |   |
|-----------|-----------------------------------------------------------------------|---|
| MS4A7     | Membrane-spanning 4-domains, subfamily A, member 7                    |   |
| MSI2      | Musashi RNA-binding protein 2                                         | √ |
| MSRA      | Methionine sulfoxide reductase A                                      |   |
| MST1      | Macrophage stimulating 1 (hepatocyte growth factor-like)              |   |
| MST1P2    | Macrophage stimulating 1 (hepatocyte growth factor-like) pseudogene 2 |   |
| MSTO2P    | Misato family member 2, pseudogene                                    |   |
| MSX2      | Msh homeobox 2                                                        |   |
| MSX2P1    | Msh homeobox 2 pseudogene 1                                           |   |
| MTA2      | Metastasis associated 1 family, member 2                              |   |
| MTHFSD    | Methenyltetrahydrofolate synthetase domain containing                 |   |
| MTL5      | Metallothionein-like 5, testis-specific (tesmin)                      |   |
| MTMR1     | Yotubularin related protein 1                                         |   |
| MTMR9     | Myotubularin related protein 9                                        |   |
| MTR       | 5-methyltetrahydrofolate-homocysteine methyltransferase               |   |
| MYB       | V-myb avian myeloblastosis viral oncogene homolog                     |   |
| MYBPC3    | Myosin binding protein C, cardiac                                     |   |
| MYCBPAP   | MYCBP associated protein                                              |   |
| MYH10     | Myosin, heavy chain 10, non-muscle                                    |   |
| MYO5A     | Myosin VA (heavy chain 12, myoxin)                                    |   |
| MYO7A     | Myosin VIIA                                                           |   |
| MYOCD     | Myocardin                                                             |   |
| MYOD1     | Myogenic differentiation 1                                            |   |
| MYOZ2     | Myozenin 2                                                            |   |
| MYOZ3     | Myozenin 3                                                            |   |
| MYPN      | Myopalladin                                                           |   |
| NACC1     | Nucleus accumbens associated 1, BEN and BTB (POZ) domain containing   |   |
| NAPIL5    | Nucleosome assembly protein 1-like 5                                  |   |
| NAPA      | N-ethylmaleimide-sensitive factor attachment protein, alpha           |   |
| NARG2     | NMDA receptor regulated 2                                             |   |
| NBLA00301 | HAND2 antisense RNA 1 (head to head)                                  |   |
| NCAM1     | Neural cell adhesion molecule 1                                       |   |

|            |                                                                                                     |   |
|------------|-----------------------------------------------------------------------------------------------------|---|
| NCAPG      | Non-SMC condensin I complex, subunit G                                                              |   |
| NCDN       | Neurochondrin                                                                                       |   |
| NCK2       | NCK adaptor protein 2                                                                               |   |
| NCLN       | Nicalin                                                                                             |   |
| NCRNA00085 | Sperm acrosome associated 6, pseudogene                                                             |   |
| NCRNA00093 | DNMBP antisense RNA 1                                                                               |   |
| NCRNA00095 | FBXL19 antisense RNA 1 (head to head)                                                               |   |
| NCRNA00105 | ASMTL antisense RNA 1                                                                               |   |
| NCRNA00213 | HOXA distal transcript antisense RNA                                                                |   |
| NCRNA00222 | Long intergenic non-protein coding RNA 222                                                          |   |
| NDUFA10    | Long intergenic non-protein coding RNA 222                                                          |   |
| NECAP2     | NECAP endocytosis associated 2                                                                      |   |
| NEDD4L     | Neural precursor cell expressed, developmentally down-regulated 4-like, E3 ubiquitin protein ligase |   |
| NEFH       | Neurofilament, heavy polypeptide                                                                    |   |
| NEFM       | Neurofilament, medium polypeptide                                                                   |   |
| NEK11      | NIMA-related kinase 11                                                                              |   |
| NEU1       | Sialidase 1                                                                                         |   |
| NEU4       | Sialidase 4                                                                                         |   |
| NF1        | Neurofibromin 1                                                                                     | √ |
| NFIA       | Nuclear factor I/A                                                                                  |   |
| NHEJ1      | Nonhomologous end-joining factor 1                                                                  |   |
| NIPA1      | Non imprinted in Prader-Willi/Angelman syndrome 1                                                   |   |
| NIPA2      | Non imprinted in Prader-Willi/Angelman syndrome 2                                                   |   |
| NIPAL4     | NIPA-like domain containing 4                                                                       |   |
| NIPSNAP3B  | Nipsnap homolog 3B ( <i>C. elegans</i> )                                                            |   |
| NISCH      | Nischarin                                                                                           |   |
| NKX2-3     | NK2 homeobox 3                                                                                      |   |
| NLRC5      | NLR family, CARD domain containing 5                                                                |   |
| NME4       | NME/NM23 nucleoside diphosphate kinase 4                                                            |   |
| NMT1       | N-myristoyltransferase 1                                                                            |   |
| NOB1       | NIN1/RPN12 binding protein 1 homolog ( <i>S. cerevisiae</i> )                                       |   |

|         |                                                                           |  |
|---------|---------------------------------------------------------------------------|--|
| NOS1AP  | Nitric oxide synthase 1 (neuronal) adaptor protein                        |  |
| NOX5    | NADPH oxidase, EF-hand calcium binding domain 5                           |  |
| NPAS3   | Neuronal PAS domain protein 3                                             |  |
| NPAS4   | Neuronal PAS domain protein 4                                             |  |
| NPEPL1  | Aminopeptidase-like 1                                                     |  |
| NPLOC4  | Nuclear protein localization 4 homolog ( <i>S. cerevisiae</i> )           |  |
| NPNT    | Nephronectin                                                              |  |
| NPTX1   | Neuronal pentraxin                                                        |  |
| NPTXR   | Neuronal pentraxin receptor                                               |  |
| NPY6R   | Neuropeptide Y receptor Y6 (pseudogene)                                   |  |
| NR1D2   | Neuropeptide Y receptor Y6 (pseudogene)                                   |  |
| NR3C1   | Nuclear receptor subfamily 3, group C, member 1 (glucocorticoid receptor) |  |
| NR4A1   | Nuclear receptor subfamily 4, group A, member 1                           |  |
| NRP1    | Neuropilin 1                                                              |  |
| NRP2    | Neuropilin 2                                                              |  |
| NRSN1   | Neurensin 1                                                               |  |
| NRXN3   | Neurexin 3                                                                |  |
| NSL1    | NSL1, MIS12 kinetochore complex component                                 |  |
| NSUN7   | NOP2/Sun domain family, member 7                                          |  |
| NT5DC3  | 5'-nucleotidase domain containing 3                                       |  |
| NTNG2   | Netrin G2                                                                 |  |
| NTSR1   | Neurotensin receptor 1 (high affinity)                                    |  |
| NUB1    | Negative regulator of ubiquitin-like proteins 1                           |  |
| NUBPL   | Nucleotide binding protein-like                                           |  |
| NUFIP2  | Nuclear fragile X mental retardation protein interacting protein 2        |  |
| OAS3    | 2'-5'-oligoadenylate synthetase 3, 100kDa                                 |  |
| OCIAD1  | OCIA domain containing 1                                                  |  |
| OLFM1   | Olfactomedin 1                                                            |  |
| OLFM4   | Olfactomedin 4                                                            |  |
| OLIG1   | Oligodendrocyte transcription factor 1                                    |  |
| ONECUT1 | One cut homeobox 1                                                        |  |

|          |                                                                            |   |
|----------|----------------------------------------------------------------------------|---|
| ONECUT2  | One cut homeobox 2                                                         |   |
| OPA3     | Optic atrophy 3 (autosomal recessive, with chorea and spastic paraplegia)  |   |
| OPN1MW   | Opsin 1 (cone pigments), medium-wave-sensitive                             |   |
| OPN3     | Opsin 3                                                                    |   |
| OR7E156P | Olfactory receptor, family 7, subfamily E, member 156 pseudogene           |   |
| ORAI3    | ORAI calcium release-activated calcium modulator 3                         |   |
| ORMDL3   | ORMDL sphingolipid biosynthesis regulator 3                                |   |
| OSBP2    | Oxysterol binding protein 2                                                |   |
| OSBPL10  | Oxysterol binding protein-like 10                                          |   |
| OSBPL2   | Oxysterol binding protein-like 2                                           |   |
| OSBPL8   | Oxysterol binding protein-like 8                                           |   |
| OTP      | Orthopedia homeobox                                                        |   |
| OTUD3    | OTU deubiquitinase 3                                                       |   |
| OVOS     | Ovostatin                                                                  |   |
| OXA1L    | Oxidase (cytochrome c) assembly 1-like                                     |   |
| P2RX7    | Purinergic receptor P2X, ligand-gated ion channel, 7                       |   |
| PABPN1   | Poly(A) binding protein, nuclear 1                                         |   |
| PACRGL   | PARK2 co-regulated-like                                                    |   |
| PACSIN1  | Protein kinase C and casein kinase substrate in neurons 1                  |   |
| PAFAH1B2 | Platelet-activating factor acetylhydrolase 1b, catalytic subunit 2 (30kDa) | √ |
| PAOX     | Polyamine oxidase (exo-N4-amino)                                           |   |
| PAPLN    | Papilin, proteoglycan-like sulfated glycoprotein                           |   |
| PAPPA2   | Pappalysin 2                                                               |   |
| PARK7    | Parkinson protein 7                                                        |   |
| PARP9    | Poly (ADP-ribose) polymerase family, member 9                              |   |
| PARVG    | Parvin, gamma                                                              |   |
| PAX5     | Paired box 5                                                               | √ |
| PAX7     | Paired box 7                                                               | √ |
| PBXIP1   | Pre-B-cell leukemia homeobox interacting protein 1                         |   |
| PCCB     | Propionyl CoA carboxylase, beta polypeptide                                |   |
| PCGF3    | Polycomb group ring finger 3                                               |   |

|         |                                                                             |   |
|---------|-----------------------------------------------------------------------------|---|
| PCGF6   | Polycomb group ring finger 6                                                |   |
| PCLO    | Piccolo presynaptic cytomatrix protein                                      |   |
| PCNXL2  | Pecanex-like 2 (Drosophila)                                                 |   |
| PCSK6   | Proprotein convertase subtilisin/kexin type 6                               |   |
| PDCD7   | Programmed cell death 7                                                     |   |
| PDCL    | Phosducin-like                                                              |   |
| PDE10A  | Phosphodiesterase 10A                                                       |   |
| PDE4DIP | Phosphodiesterase 4D interacting protein                                    | √ |
| PDE8B   | Phosphodiesterase 8B                                                        |   |
| PKD1    | Pyruvate dehydrogenase kinase, isozyme 1                                    |   |
| PDLIM2  | PDZ and LIM domain 2 (mystique)                                             |   |
| PDLIM3  | PDZ and LIM domain 3                                                        |   |
| PDS5B   | PDS5, regulator of cohesion maintenance, homolog B ( <i>S. cerevisiae</i> ) |   |
| PDXK    | Pyridoxal (pyridoxine, vitamin B6) kinase                                   |   |
| PDXP    | Pyridoxal (pyridoxine, vitamin B6) phosphatase                              |   |
| PELI1   | Pellino E3 ubiquitin protein ligase 1                                       |   |
| PELI3   | Pellino E3 ubiquitin protein ligase family member 3                         |   |
| PER1    | Period circadian clock 1                                                    | √ |
| PERP    | PERP, TP53 apoptosis effector                                               |   |
| PEX14   | Peroxisomal biogenesis factor 14                                            |   |
| PEX7    | Peroxisomal biogenesis factor 7                                             |   |
| PFDN1   | Prefoldin subunit 1                                                         |   |
| PGBD5   | PiggyBac transposable element derived 5                                     |   |
| PGGT1B  | Protein geranylgeranyltransferase type I, beta subunit                      |   |
| PGM5    | Phosphoglucomutase 5                                                        |   |
| PGP     | Phosphoglycolate phosphatase                                                |   |
| PHACTR1 | Phosphatase and actin regulator 1                                           |   |
| PHACTR2 | Phosphatase and actin regulator 2                                           |   |
| PHB2    | Prohibitin 2                                                                |   |
| PHF11   | PHD finger protein 11                                                       |   |
| PHF15   | PHD finger protein 15                                                       |   |



|          |                                                                                |   |
|----------|--------------------------------------------------------------------------------|---|
| PHF21A   | PHD finger protein 21A                                                         |   |
| PHF8     | PHD finger protein 8                                                           |   |
| PHLDB1   | Pleckstrin homology-like domain, family B, member 1                            |   |
| PIAS2    | Protein inhibitor of activated STAT, 2                                         |   |
| PID1     | Phosphotyrosine interaction domain containing 1                                |   |
| PIK3C2G  | Phosphotyrosine interaction domain containing 1                                |   |
| PIK3C3   | Phosphatidylinositol 3-kinase, catalytic subunit type 3                        |   |
| PIK3R2   | Phosphoinositide-3-kinase, regulatory subunit 2 (beta)                         |   |
| PIM1     | Pim-1 proto-oncogene, serine/threonine kinase                                  | √ |
| PIN1     | Peptidylprolyl cis/trans isomerase, NIMA-interacting 1                         |   |
| PIP4K2C  | Phosphatidylinositol-5-phosphate 4-kinase, type II, gamma                      |   |
| PIP5K1P1 | Phosphatidylinositol-4-phosphate 5-kinase, type I, pseudogene 1                |   |
| PIP5KL1  | Phosphatidylinositol-4-phosphate 5-kinase-like 1                               |   |
| PKD1L2   | Polycystic kidney disease 1-like 2                                             |   |
| PKP2     | Plakophilin 2                                                                  |   |
| PLA2G15  | Phospholipase A2, group XV                                                     |   |
| PLA2G4F  | Phospholipase A2, group IVF                                                    |   |
| PLA2G5   | Phospholipase A2, group V                                                      |   |
| PLAT     | Plasminogen activator, tissue                                                  |   |
| PLB1     | Phospholipase B1                                                               |   |
| PLCL2    | Phospholipase C-like 2                                                         |   |
| PLEKHA5  | Pleckstrin homology domain containing, family A member 5                       |   |
| PLEKHA7  | Pleckstrin homology domain containing, family A member 7                       |   |
| PLEKHB2  | Pleckstrin homology domain containing, family B (evectins) member 2            |   |
| PLEKHG1  | Pleckstrin homology domain containing, family G (with RhoGef domain) member 1  |   |
| PLEKHG4B | Pleckstrin homology domain containing, family G (with RhoGef domain) member 4B |   |
| PLEKHM3  | Pleckstrin homology domain containing, family M, member 3                      |   |
| PLK3     | Polo-like kinase 3                                                             |   |
| PLP1     | Proteolipid protein 1                                                          |   |
| PLVAP    | Plasmalemma vesicle associated protein                                         |   |
| PLXND1   | Plexin D1                                                                      |   |

|           |                                                                       |   |
|-----------|-----------------------------------------------------------------------|---|
| PM20D2    | Peptidase M20 domain containing 2                                     |   |
| PML       | Promyelocytic leukemia                                                | √ |
| PMS2L11   | DTX2P1-UPK3BP1-PMS2P11 readthrough transcribed pseudogene             |   |
| PMS2L2    | Postmeiotic segregation increased 2-like 2 pseudogene                 |   |
| PMS2L3    | Postmeiotic segregation increased 2 pseudogene 3                      |   |
| PMS2L5    | Postmeiotic segregation increased 2 pseudogene 5                      |   |
| PNLIPRP3  | Pancreatic lipase-related protein 3                                   |   |
| PNMA3     | Paraneoplastic Ma antigen 3                                           |   |
| PNPLA4    | Patatin-like phospholipase domain containing 4                        |   |
| PODN      | Podocan                                                               |   |
| POLD1     | Polymerase (DNA directed), delta 1, catalytic subunit                 |   |
| POLN      | Polymerase (DNA directed) nu                                          |   |
| POLR1D    | Polymerase (RNA) I polypeptide D, 16kDa                               |   |
| POLR1E    | Polymerase (RNA) I polypeptide E, 53kDa                               |   |
| POLR2H    | Polymerase (RNA) II (DNA directed) polypeptide H                      |   |
| POM121C   | POM121 transmembrane nucleoporin C                                    |   |
| POM121L8P | POM121 transmembrane nucleoporin-like 8 pseudogene                    |   |
| POM121L9P | POM121 transmembrane nucleoporin-like 9, pseudogene                   |   |
| POU2F2    | POU class 2 homeobox 2                                                |   |
| POU2F3    | POU class 2 homeobox 3                                                |   |
| PPARA     | Peroxisome proliferator-activated receptor alpha                      |   |
| PPARGC1A  | Peroxisome proliferator-activated receptor gamma, coactivator 1 alpha |   |
| PPFIBP1   | PTPRF interacting protein, binding protein 1 (liprin beta 1)          |   |
| PPFIBP2   | PTPRF interacting protein, binding protein 2 (liprin beta 2)          |   |
| PPIL5     | Leucine rich repeat protein 1                                         |   |
| PIIP5K2   | Diphosphoinositol pentakisphosphate kinase 2                          |   |
| PPM1K     | Protein phosphatase, Mg <sup>2+</sup> /Mn <sup>2+</sup> dependent, 1K |   |
| PPP1R12A  | Protein phosphatase 1, regulatory subunit 12A                         |   |
| PPP1R12B  | Protein phosphatase 1, regulatory subunit 12B                         |   |
| PPP1R14C  | Protein phosphatase 1, regulatory (inhibitor) subunit 14C             |   |
| PPP2R1B   | Protein phosphatase 2, regulatory subunit A, beta                     |   |

|          |                                                                              |  |
|----------|------------------------------------------------------------------------------|--|
| PPP2R4   | Protein phosphatase 2A activator, regulatory subunit 4                       |  |
| PPP4C    | Protein phosphatase 4, catalytic subunit                                     |  |
| PPP6C    | Protein phosphatase 6, catalytic subunit                                     |  |
| PPRC1    | Peroxisome proliferator-activated receptor gamma, coactivator-related 1      |  |
| PQLC1    | PQ loop repeat containing 1                                                  |  |
| PRAMEF11 | PRAME family member 11                                                       |  |
| PRAMEF4  | PRAME family member 4                                                        |  |
| PRAMEF5  | PRAME family member 5                                                        |  |
| PRAMEF6  | PRAME family member 6                                                        |  |
| PRAMEF9  | PRAME family member 9                                                        |  |
| PRDM2    | PR domain containing 2, with ZNF domain                                      |  |
| PRDX2    | Peroxiredoxin 2                                                              |  |
| PRELP    | Proline/arginine-rich end leucine-rich repeat protein                        |  |
| PRG4     | Proteoglycan 4                                                               |  |
| PRKCZ    | Protein kinase C, zeta                                                       |  |
| PRKRA    | Protein kinase, interferon-inducible double stranded RNA dependent activator |  |
| PRKX     | Protein kinase, X-linked                                                     |  |
| PRKY     | Protein kinase, Y-linked, pseudogene                                         |  |
| PRMT1    | Protein arginine methyltransferase 1                                         |  |
| PRMT2    | Protein arginine methyltransferase 2                                         |  |
| PRPF3    | Pre-mRNA processing factor 3                                                 |  |
| PRPF4    | Pre-mRNA processing factor 4                                                 |  |
| PRPH2    | Peripherin 2 (retinal degeneration, slow)                                    |  |
| PRR18    | Proline rich 18                                                              |  |
| PRR23A   | Proline rich 23A                                                             |  |
| PRRC1    | Proline-rich coiled-coil 1                                                   |  |
| PRUNE    | Prune exopolyphosphatase                                                     |  |
| PSD3     | Pleckstrin and Sec7 domain containing 3                                      |  |
| PSMB4    | Proteasome (prosome, macropain) subunit, beta type, 4                        |  |
| PSMD9    | Proteasome (prosome, macropain) 26S subunit, non-ATPase, 9                   |  |
| PTAFR    | Platelet-activating factor receptor                                          |  |

|           |                                                                                         |   |
|-----------|-----------------------------------------------------------------------------------------|---|
| PTBP1     | Polypyrimidine tract binding protein 1                                                  |   |
| PTEN      | Phosphatase and tensin homolog                                                          | √ |
| PTGDR     | Prostaglandin D2 receptor (DP)                                                          |   |
| PTGFRN    | Prostaglandin F2 receptor inhibitor                                                     |   |
| PTK7      | Protein tyrosine kinase 7                                                               |   |
| PTPN5     | Protein tyrosine phosphatase, non-receptor type 5 (striatum-enriched)                   |   |
| PTPN6     | Protein tyrosine phosphatase, non-receptor type 6                                       |   |
| PTPRD     | Protein tyrosine phosphatase, receptor type, D                                          |   |
| PTPRJ     | Protein tyrosine phosphatase, receptor type, J                                          |   |
| PTRF      | Polymerase I and transcript release factor                                              |   |
| PUS1      | Pseudouridylate synthase 1                                                              |   |
| PXDN      | Peroxidasin homolog (Drosophila)                                                        |   |
| QPRT      | Quinolate phosphoribosyltransferase                                                     |   |
| QRICH1    | Glutamine-rich 1                                                                        |   |
| RAB11FIP4 | RAB11 family interacting protein 4 (class II)                                           |   |
| RAB3GAP1  | RAB3 GTPase activating protein subunit 1 (catalytic)                                    |   |
| RAB3IP    | RAB3A interacting protein                                                               |   |
| RAB40C    | RAB40C, member RAS oncogene family                                                      |   |
| RABGAP1   | RAB GTPase activating protein 1                                                         |   |
| RABGEF1   | RAB guanine nucleotide exchange factor (GEF) 1                                          |   |
| RAC2      | Ras-related C3 botulinum toxin substrate 2 (rho family, small GTP binding protein Rac2) |   |
| RALGDS    | Ral guanine nucleotide dissociation stimulator                                          |   |
| RANBP17   | RAN binding protein 17                                                                  | √ |
| RAP1GAP2  | RAP1 GTPase activating protein 2                                                        |   |
| RAPGEF3   | Rap guanine nucleotide exchange factor (GEF) 3                                          |   |
| RAPGEFL1  | Rap guanine nucleotide exchange factor (GEF)-like 1                                     |   |
| RARRES1   | Retinoic acid receptor responder (tazarotene induced) 1                                 |   |
| RASA4     | RAS p21 protein activator 4                                                             |   |
| RASA4     | RAS p21 protein activator 4                                                             |   |
| RASA4B    | RAS p21 protein activator 4B                                                            |   |
| RASL10B   | RAS-like, family 10, member B                                                           |   |

|          |                                                                     |  |
|----------|---------------------------------------------------------------------|--|
| RASSF2   | Ras association (RalGDS/AF-6) domain family member 2                |  |
| RBM22    | RNA binding motif protein 22                                        |  |
| RBM9     | RNA binding protein, fox-1 homolog (C. elegans) 2                   |  |
| RBMXL2   | RNA binding motif protein, X-linked-like 2                          |  |
| RECK     | Reversion-inducing-cysteine-rich protein with kazal motifs          |  |
| RECQL5   | RecQ protein-like 5                                                 |  |
| REEP6    | Receptor accessory protein 6                                        |  |
| RELA     | V-rel avian reticuloendotheliosis viral oncogene homolog A          |  |
| REM1     | RAS (RAD and GEM)-like GTP-binding 1                                |  |
| REXO1L2P | REX1, RNA exonuclease 1 homolog (S. cerevisiae)-like 2 (pseudogene) |  |
| RGAG4    | Retrotransposon gag domain containing 4                             |  |
| RGPD4    | RANBP2-like and GRIP domain containing 4                            |  |
| RGS12    | Regulator of G-protein signaling 12                                 |  |
| RGS3     | Regulator of G-protein signaling 3                                  |  |
| RGS6     | Regulator of G-protein signaling 6                                  |  |
| RGS9     | Regulator of G-protein signaling 9                                  |  |
| RHBDF2   | Rhomboid 5 homolog 2 (Drosophila)                                   |  |
| RHOBTB1  | Rho-related BTB domain containing 1                                 |  |
| RHOT1    | Ras homolog family member T1                                        |  |
| RIBC1    | RIB43A domain with coiled-coils 1                                   |  |
| RIC8B    | RIC8 guanine nucleotide exchange factor B                           |  |
| RICTOR   | RPTOR independent companion of MTOR, complex 2                      |  |
| RIMS3    | Regulating synaptic membrane exocytosis 3                           |  |
| RIOK3    | RIO kinase 3                                                        |  |
| RIT2     | Ras-like without CAAX 2                                             |  |
| RMND5A   | Required for meiotic nuclear division 5 homolog A (S. cerevisiae)   |  |
| RNASEL   | Ribonuclease L (2',5'-oligoadenylate synthetase-dependent)          |  |
| RNF10    | Ring finger protein 10                                              |  |
| RNF111   | Ring finger protein 111                                             |  |
| RNF115   | Ring finger protein 115                                             |  |
| RNF126P1 | Ring finger protein 126 pseudogene 1                                |  |

|           |                                                                            |   |
|-----------|----------------------------------------------------------------------------|---|
| RNF165    | Ring finger protein 165                                                    |   |
| RNF169    | Ring finger protein 169                                                    |   |
| RNF17     | Ring finger protein 17                                                     |   |
| RNF222    | Ring finger protein 222                                                    |   |
| RNF24     | Ring finger protein 24                                                     |   |
| RNF32     | Ring finger protein 32                                                     |   |
| RNF7      | Ring finger protein 7                                                      |   |
| RNF8      | Ring finger protein 8, E3 ubiquitin protein ligase                         |   |
| RNFT2     | Ring finger protein, transmembrane 2                                       |   |
| RNMT      | RNA (guanine-7-) methyltransferase                                         |   |
| ROBO1     | Roundabout, axon guidance receptor, homolog 1 (Drosophila)                 |   |
| ROBO2     | Roundabout, axon guidance receptor, homolog 2(Drosophila)                  |   |
| ROBO4     | Roundabout, axon guidance receptor, homolog 3 (Drosophila)                 |   |
| RORA      | RAR-related orphan receptor A                                              |   |
| RPA1      | Replication protein A1, 70kDa                                              |   |
| RPAP3     | RNA polymerase II associated protein 3                                     |   |
| RPL10     | Ribosomal protein L10                                                      | √ |
| RPL23AP82 | Ribosomal protein L23a pseudogene 82                                       |   |
| RPS18     | Ribosomal protein S18                                                      |   |
| RPS21     | Ribosomal protein S21                                                      |   |
| RPS28     | Ribosomal protein S28                                                      |   |
| RPUSD3    | RNA pseudouridylate synthase domain containing 3                           |   |
| RRAGD     | Ras-related GTP binding D                                                  |   |
| RRN3P2    | RNA polymerase I transcription factor homolog (S. cerevisiae) pseudogene 2 |   |
| RTEL1     | Regulator of telomere elongation helicase 1                                |   |
| RTF1      | Rtf1, Paf1/RNA polymerase II complex component, homolog (S. cerevisiae)    |   |
| RTKN      | Rhotekin                                                                   |   |
| RTKN2     | Rhotekin 2                                                                 |   |
| RUSC1     | RUN and SH3 domain containing 1                                            |   |
| RUSC2     | RUN and SH3 domain containing 2                                            |   |
| RXRA      | Retinoid X receptor, alpha                                                 |   |

|         |                                                                                                                  |  |
|---------|------------------------------------------------------------------------------------------------------------------|--|
| S100A1  | S100 calcium binding protein A1                                                                                  |  |
| S100A3  | S100 calcium binding protein A3                                                                                  |  |
| SAE1    | SUMO1 activating enzyme subunit 1                                                                                |  |
| SALL2   | Spalt-like transcription factor 2                                                                                |  |
| SAP30BP | SAP30 binding protein                                                                                            |  |
| SAP30L  | SAP30-like                                                                                                       |  |
| SAPS1   | Protein phosphatase 6, regulatory subunit 1                                                                      |  |
| SART1   | Squamous cell carcinoma antigen recognized by T cells                                                            |  |
| SART3   | Squamous cell carcinoma antigen recognized by T cells 3                                                          |  |
| SATB2   | SATB homeobox 2                                                                                                  |  |
| SBF2    | SET binding factor 2                                                                                             |  |
| SC65    | Leprecan-like 4                                                                                                  |  |
| SCAMP4  | Secretory carrier membrane protein 4                                                                             |  |
| SCARA5  | Scavenger receptor class A, member 5                                                                             |  |
| SCARNA6 | Small Cajal body-specific RNA 6                                                                                  |  |
| SCD5    | Stearoyl-CoA desaturase 5                                                                                        |  |
| SCFD2   | Sec1 family domain containing 2                                                                                  |  |
| SCN2A   | Sodium channel, voltage-gated, type II, alpha subunit                                                            |  |
| SCN4B   | Sodium channel, voltage-gated, type IV, beta subunit                                                             |  |
| SCN7A   | Sodium channel, voltage-gated, type VII, alpha subunit                                                           |  |
| SCN8A   | Sodium channel, voltage gated, type VIII, alpha subunit                                                          |  |
| SCNM1   | Sodium channel modifier 1                                                                                        |  |
| SDC3    | Syndecan 3                                                                                                       |  |
| SDHAF1  | Succinate dehydrogenase complex assembly factor 1                                                                |  |
| SEC14L1 | SEC14-like 1 ( <i>S. cerevisiae</i> )                                                                            |  |
| SEC14L2 | SEC14-like 2 ( <i>S. cerevisiae</i> )                                                                            |  |
| SEC14L5 | SEC14-like 5 ( <i>S. cerevisiae</i> )                                                                            |  |
| SEC24D  | SEC24 family member D                                                                                            |  |
| SEMA3B  | Sema domain, immunoglobulin domain (Ig), short basic domain, secreted, (semaphorin) 3B                           |  |
| SEMA4D  | Sema domain, immunoglobulin domain (Ig), transmembrane domain (TM) and short cytoplasmic domain, (semaphorin) 4D |  |
| SEMA4G  | Sema domain, immunoglobulin domain (Ig), transmembrane domain (TM) and short cytoplasmic domain, (semaphorin) 4G |  |

|          |                                                     |   |
|----------|-----------------------------------------------------|---|
| SENP6    | SUMO1/sentrin specific peptidase 6                  |   |
| SEPHS1   | Selenophosphate synthetase 1                        |   |
| SEPN1    | Selenoprotein N, 1                                  |   |
| SEPT5    | Septin 5                                            |   |
| SEPT6    | Septin 6                                            | √ |
| SERF2    | Small EDRK-rich factor 2                            |   |
| SERHL    | Serine hydrolase-like                               |   |
| SET      | SET nuclear proto-oncogene                          | √ |
| SETBP1   | SET binding protein 1                               | √ |
| SETD8    | SET domain containing (lysine methyltransferase) 8  |   |
| SF1      | Splicing factor 1                                   |   |
| SFI1     | Sfi I homolog, spindle assembly associated (yeast)  |   |
| SFRS1    | Serine/arginine-rich splicing factor 1              |   |
| SFRS12   | Splicing regulatory glutamine/lysine-rich protein 1 |   |
| SFRS13A  | Serine/arginine-rich splicing factor 10             |   |
| SFRS4    | Serine/arginine-rich splicing factor 4              |   |
| SFXN3    | Sideroflexin 3                                      |   |
| SFXN5    | Sideroflexin 5                                      |   |
| SGCB     | Sarcoglycan, beta                                   |   |
| SGEF     | Rho guanine nucleotide exchange factor (GEF) 26     |   |
| SH2D4B   | SH2 domain containing 4B                            |   |
| SH3BP2   | SH3-domain binding protein 2                        |   |
| SH3PXD2B | SH3 and PX domains 2B                               |   |
| SHANK3   | SH3 and multiple ankyrin repeat domains 3           |   |
| SHISA6   | Shisa family member 6                               |   |
| SHOX2    | Short stature homeobox 2                            |   |
| SHPK     | Sedoheptulokinase                                   |   |
| SHQ1     | SHQ1, H/ACA ribonucleoprotein assembly factor       |   |
| SHROOM2  | Shroom family member 2                              |   |
| SHROOM4  | Shroom family member 4                              |   |
| SI       | Sucrase-isomaltase (alpha-glucosidase)              |   |



|          |                                                                                        |  |
|----------|----------------------------------------------------------------------------------------|--|
| SIDT1    | SID1 transmembrane family, member 1                                                    |  |
| SIGLEC1  | Sialic acid binding Ig-like lectin 1, sialoadhesin                                     |  |
| SIPA1L3  | Signal-induced proliferation-associated 1 like 3                                       |  |
| SKA1     | Spindle and kinetochore associated complex subunit 1                                   |  |
| SLC11A2  | Solute carrier family 11 (proton-coupled divalent metal ion transporter), member 2     |  |
| SLC12A3  | Solute carrier family 12 (sodium/chloride transporter), member 3                       |  |
| SLC12A5  | Solute carrier family 12 (potassium/chloride transporter), member 5                    |  |
| SLC13A2  | Solute carrier family 13 (sodium-dependent dicarboxylate transporter), member 2        |  |
| SLC17A5  | Solute carrier family 17 (acidic sugar transporter), member 5                          |  |
| SLC1A7   | Solute carrier family 1 (glutamate transporter), member 7                              |  |
| SLC20A2  | Solute carrier family 20 (phosphate transporter), member 2                             |  |
| SLC22A12 | Solute carrier family 22 (organic anion/urate transporter), member 12                  |  |
| SLC22A3  | Solute carrier family 22 (organic cation transporter), member 3                        |  |
| SLC22A4  | Solute carrier family 22 (organic cation/zwitterion transporter), member 4             |  |
| SLC25A37 | Solute carrier family 25 (mitochondrial iron transporter), member 37                   |  |
| SLC25A42 | Solute carrier family 25, member 42                                                    |  |
| SLC30A8  | Solute carrier family 30 (zinc transporter), member 8                                  |  |
| SLC35A3  | Solute carrier family 35 (UDP-N-acetylglucosamine (UDP-GlcNAc) transporter), member A3 |  |
| SLC35B4  | Solute carrier family 35 (UDP-xylose/UDP-N-acetylglucosamine transporter), member B4   |  |
| SLC35E2  | Solute carrier family 35, member E2                                                    |  |
| SLC39A13 | Solute carrier family 39 (zinc transporter), member 13                                 |  |
| SLC39A3  | Solute carrier family 39 (zinc transporter), member 3                                  |  |
| SLC45A4  | Solute carrier family 45, member 4                                                     |  |
| SLC46A1  | Solute carrier family 46 (folate transporter), member 1                                |  |
| SLC4A1   | Solute carrier family 4 (anion exchanger), member 1 (Diego blood group)                |  |
| SLC4A2   | Solute carrier family 4 (anion exchanger), member 2                                    |  |
| SLC6A2   | Solute carrier family 6 (neurotransmitter transporter), member 2                       |  |
| SLC6A20  | Solute carrier family 6 (proline IMINO transporter), member 20                         |  |
| SLC6A6   | Solute carrier family 6 (neurotransmitter transporter), member 6                       |  |
| SLC7A2   | Solute carrier family 7 (cationic amino acid transporter, y+ system), member 2         |  |
| SLC7A5   | Solute carrier family 7 (amino acid transporter light chain, L system), member 5       |  |

|             |                                                                                                   |   |
|-------------|---------------------------------------------------------------------------------------------------|---|
| SLC8A1      | Solute carrier family 8 (sodium/calcium exchanger), member 1                                      |   |
| SLC9A2      | Solute carrier family 9, subfamily A (NHE2, cation proton antiporter 2), member 2                 |   |
| SLCO1A2     | Solute carrier organic anion transporter family, member 1A2                                       |   |
| SLCO2B1     | Solute carrier organic anion transporter family, member 2B1                                       |   |
| SLCO5A1     | Solute carrier organic anion transporter family, member 5A1                                       |   |
| SMAD1       | SMAD family member 1                                                                              |   |
| SMAP1       | Small ArfGAP 1                                                                                    |   |
| SMARCAL1    | SWI/SNF related, matrix associated, actin dependent regulator of chromatin, subfamily a-like 1    |   |
| SMARCE1     | SWI/SNF related, matrix associated, actin dependent regulator of chromatin, subfamily e, member 1 | √ |
| SMCHD1      | Structural maintenance of chromosomes flexible hinge domain containing 1                          |   |
| SMCR8       | Smith-Magenis syndrome chromosome region, candidate 8                                             |   |
| SMG6        | SMG6 nonsense mediated mRNA decay factor                                                          |   |
| SMPD1       | Sphingomyelin phosphodiesterase 1, acid lysosomal                                                 |   |
| SMPD4       | Sphingomyelin phosphodiesterase 4, neutral membrane (neutral sphingomyelinase-3)                  |   |
| SMUG1       | Single-strand-selective monofunctional uracil-DNA glycosylase 1                                   |   |
| SMURF1      | SMAD specific E3 ubiquitin protein ligase 1                                                       |   |
| SNAPC5      | Small nuclear RNA activating complex, polypeptide 5, 19kDa                                        |   |
| SNORA70     | Small nucleolar RNA, H/ACA box 70                                                                 |   |
| SNORD114-24 | Small nucleolar RNA, C/D box 114-24                                                               |   |
| SNORD35A    | Small nucleolar RNA, C/D box 35A                                                                  |   |
| SNORD35B    | Small nucleolar RNA, C/D box 35B                                                                  |   |
| SNPH        | Syntaphilin                                                                                       |   |
| SNRPN       | Small nuclear ribonucleoprotein polypeptide N                                                     |   |
| SNTB2       | Syntrophin, beta 2 (dystrophin-associated protein A1, 59 kDa, basic component 2)                  |   |
| SNTG1       | Syntrophin, gamma 1                                                                               |   |
| SNTG2       | Syntrophin, gamma 2                                                                               |   |
| SNX21       | Sorting nexin family member 21                                                                    |   |
| SNX22       | Sorting nexin family member 22                                                                    |   |
| SNX29       | Sorting nexin 29                                                                                  |   |
| SOBP        | Sine oculis binding protein homolog (Drosophila)                                                  |   |
| SOCS3       | Suppressor of cytokine signaling 3                                                                |   |

|          |                                                                                                      |  |
|----------|------------------------------------------------------------------------------------------------------|--|
| SOCS4    | Suppressor of cytokine signaling 4                                                                   |  |
| SOCS7    | Suppressor of cytokine signaling 7                                                                   |  |
| SOHLH2   | Spermatogenesis and oogenesis specific basic helix-loop-helix 2                                      |  |
| SORCS2   | Sortilin-related VPS10 domain containing receptor 2                                                  |  |
| SORCS3   | Sortilin-related VPS10 domain containing receptor 3                                                  |  |
| SORL1    | Sortilin-related receptor, L(DLR class) A repeats containing                                         |  |
| SOX13    | SRY (sex determining region Y)-box 13                                                                |  |
| SOX4     | SRY (sex determining region Y)-box 4                                                                 |  |
| SP140    | SP140 nuclear body protein                                                                           |  |
| SP140L   | SP140 nuclear body protein-like                                                                      |  |
| SPACA1   | Sperm acrosome associated 1                                                                          |  |
| SPATA17  | Spermatogenesis associated 17                                                                        |  |
| SPATA18  | Spermatogenesis associated 18                                                                        |  |
| SPATA5L1 | Spermatogenesis associated 5-like 1                                                                  |  |
| SPDYE3   | Speedy/RINGO cell cycle regulator family member E3                                                   |  |
| SPEF1    | Sperm flagellar 1                                                                                    |  |
| SPG7     | Spastic paraplegia 7 (pure and complicated autosomal recessive)                                      |  |
| SPN      | Sialophorin                                                                                          |  |
| SPOCK1   | Sparc/osteonectin, cwcv and kazal-like domains proteoglycan (testican) 1                             |  |
| SPOCK2   | Sparc/osteonectin, cwcv and kazal-like domains proteoglycan (testican) 2                             |  |
| SPRED1   | Sprouty-related, EVH1 domain containing 1                                                            |  |
| SPTB     | Spectrin, beta, erythrocytic                                                                         |  |
| SPTLC3   | Serine palmitoyltransferase, long chain base subunit 3                                               |  |
| SRC      | SRC proto-oncogene, non-receptor tyrosine kinase                                                     |  |
| SRCAP    | Snf2-related CREBBP activator protein                                                                |  |
| SRD5A1   | Steroid-5-alpha-reductase, alpha polypeptide 1 (3-oxo-5 alpha-steroid delta 4-dehydrogenase alpha 1) |  |
| SRGAP1   | SLIT-ROBO Rho GTPase activating protein 1                                                            |  |
| SRGAP3   | SLIT-ROBO Rho GTPase activating protein 3                                                            |  |
| SRP14P1  | Signal recognition particle 14kDa (homologous Alu RNA binding protein) pseudogene 1                  |  |
| SRRM1    | Serine/arginine repetitive matrix 1                                                                  |  |
| SRRM3    | Serine/arginine repetitive matrix 3                                                                  |  |

|         |                                                                      |   |
|---------|----------------------------------------------------------------------|---|
| SS18L1  | Synovial sarcoma translocation gene on chromosome 18-like 1          | √ |
| SSH1    | Slingshot protein phosphatase 1                                      |   |
| SSX8    | Synovial sarcoma, X breakpoint 8                                     |   |
| ST3GAL3 | ST3 beta-galactoside alpha-2,3-sialyltransferase 3                   |   |
| ST3GAL4 | ST3 beta-galactoside alpha-2,3-sialyltransferase 4                   |   |
| ST8SIA3 | ST8 alpha-N-acetyl-neuraminide alpha-2,8-sialyltransferase 3         |   |
| STAG3L1 | Stromal antigen 3-like 1 (pseudogene)                                |   |
| STAG3L2 | Stromal antigen 3-like 2 (pseudogene)                                |   |
| STAG3L3 | Stromal antigen 3-like 3 (pseudogene)                                |   |
| STARD3  | StAR-related lipid transfer (START) domain containing 3              |   |
| STIM2   | Stromal interaction molecule 2                                       |   |
| STK11IP | Serine/threonine kinase 11 interacting protein                       |   |
| STK16   | Serine/threonine kinase 16                                           |   |
| STK19   | Serine/threonine kinase 19                                           |   |
| STK24   | Serine/threonine kinase 24                                           |   |
| STK4    | Serine/threonine kinase 4                                            |   |
| STON1   | Stonin 1                                                             |   |
| STX17   | Syntaxin 17                                                          |   |
| SUDS3   | Suppressor of defective silencing 3 homolog ( <i>S. cerevisiae</i> ) |   |
| SULF1   | Sulfatase 1                                                          |   |
| SULT4A1 | Sulfotransferase family 4A, member 1                                 |   |
| SUMF2   | Sulfatase modifying factor 2                                         |   |
| SUN1    | Sad1 and UNC84 domain containing 1                                   |   |
| SURF4   | Surfeit 4                                                            |   |
| SV2B    | Synaptic vesicle glycoprotein 2B                                     |   |
| SVOP    | SV2 related protein homolog (rat)                                    |   |
| SYMPK   | Symplekin                                                            |   |
| SYN3    | Synapsin III                                                         |   |
| SYNGR1  | Synaptogyrin 1                                                       |   |
| SYNJ2   | Synaptojanin 2                                                       |   |
| SYNM    | Synemin, intermediate filament protein                               |   |

|         |                                                                            |   |
|---------|----------------------------------------------------------------------------|---|
| SYNPO2  | Synaptopodin 2                                                             |   |
| SYPL2   | Synaptophysin-like 2                                                       |   |
| SYT1    | Synaptotagmin I                                                            |   |
| TACC1   | Transforming, acidic coiled-coil containing protein 1                      |   |
| TAL1    | T-cell acute lymphocytic leukemia 1                                        | √ |
| TANC1   | Tetratricopeptide repeat, ankyrin repeat and coiled-coil containing 1      |   |
| TANC2   | Tetratricopeptide repeat, ankyrin repeat and coiled-coil containing 2      |   |
| TAP2    | Transporter 2, ATP-binding cassette, sub-family B (MDR/TAP)                |   |
| TAPBP   | TAP binding protein (tapasin)                                              |   |
| TAPBPL  | TAP binding protein-like                                                   |   |
| TARBP2  | TAR (HIV-1) RNA binding protein 2                                          |   |
| TBC1D14 | TBC1 domain family, member 14                                              |   |
| TBC1D16 | TBC1 domain family, member 16                                              |   |
| TBC1D20 | TBC1 domain family, member 20                                              |   |
| TBC1D21 | TBC1 domain family, member 21                                              |   |
| TBC1D24 | TBC1 domain family, member 24                                              |   |
| TBC1D2B | TBC1 domain family, member 2B                                              |   |
| TBC1D4  | TBC1 domain family, member 4                                               |   |
| TBC1D9B | TBC1 domain family, member 9B (with GRAM domain)                           |   |
| TBL1XR1 | Transducin (beta)-like 1 X-linked receptor 1                               | √ |
| TBR1    | T-box, brain, 1                                                            |   |
| TBX2    | T-box 2                                                                    |   |
| TCEB2   | Transcription elongation factor B (SIII), polypeptide 2 (18kDa, elongin B) |   |
| TCEB2   | Transcription elongation factor B (SIII), polypeptide 2 (18kDa, elongin B) |   |
| TCF19   | Transcription factor 19                                                    |   |
| TCL6    | T-cell leukemia/lymphoma 6 (non-protein coding)                            | √ |
| TCN2    | Transcobalamin II                                                          |   |
| TDG     | Thymine-DNA glycosylase                                                    |   |
| TDRD12  | Tudor domain containing 12                                                 |   |
| TEC     | Tec protein tyrosine kinase                                                |   |
| TEF     | Thyrotrophic embryonic factor                                              |   |

|         |                                                                             |   |
|---------|-----------------------------------------------------------------------------|---|
| TENC1   | Tensin like C1 domain containing phosphatase (tensin 2)                     |   |
| TET2    | Tet methylcytosine dioxygenase 2                                            | √ |
| TET3    | Tet methylcytosine dioxygenase 3                                            |   |
| TF      | Transferrin                                                                 |   |
| TFAM    | Transcription factor A, mitochondrial                                       |   |
| TFAP2B  | Transcription factor AP-2 beta (activating enhancer binding protein 2 beta) |   |
| TFCP2L1 | Transcription factor CP2-like 1                                             |   |
| TGFB2   | Transforming growth factor, beta 2                                          |   |
| TGIF2   | TGFB-induced factor homeobox 2                                              |   |
| TGOLN2  | Trans-golgi network protein 2                                               |   |
| THAP5   | THAP domain containing 5                                                    |   |
| THOC1   | THO complex 1                                                               |   |
| THRA    | Thyroid hormone receptor, alpha                                             |   |
| THSD4   | Thrombospondin, type I, domain containing 4                                 |   |
| THSD7A  | Thrombospondin, type I, domain containing 7A                                |   |
| THSD7B  | Thrombospondin, type I, domain containing 7B                                |   |
| TIAM1   | T-cell lymphoma invasion and metastasis 1                                   |   |
| TIMM17B | Translocase of inner mitochondrial membrane 17 homolog B (yeast)            |   |
| TIMM22  | Translocase of inner mitochondrial membrane 22 homolog (yeast)              |   |
| TINAG   | Tubulointerstitial nephritis antigen                                        |   |
| TJP2    | Tight junction protein 2                                                    |   |
| TLE2    | Transducin-like enhancer of split 2                                         |   |
| TLN2    | Talin 2                                                                     |   |
| TM9SF3  | Transmembrane 9 superfamily member 3                                        |   |
| TMC5    | Transmembrane channel-like 5                                                |   |
| TMC6    | Transmembrane channel-like 6                                                |   |
| TMCC3   | Transmembrane and coiled-coil domain family 3                               |   |
| TMEM107 | Transmembrane protein 107                                                   |   |
| TMEM135 | Transmembrane protein 135                                                   |   |
| TMEM140 | Transmembrane protein 140                                                   |   |
| TMEM143 | Transmembrane protein 143                                                   |   |

|          |                                                                                |   |
|----------|--------------------------------------------------------------------------------|---|
| TMEM151B | Transmembrane protein 151B                                                     |   |
| TMEM154  | Transmembrane protein 154                                                      |   |
| TMEM159  | Transmembrane protein 159                                                      |   |
| TMEM179  | Transmembrane protein 179                                                      |   |
| TMEM202  | Transmembrane protein 202                                                      |   |
| TMEM208  | Transmembrane protein 208                                                      |   |
| TMEM229B | Transmembrane protein 229B                                                     |   |
| TMEM50A  | Transmembrane protein 50A                                                      |   |
| TMEM54   | Transmembrane protein 54                                                       |   |
| TMEM57   | Transmembrane protein 57                                                       |   |
| TMEM95   | Transmembrane protein 95                                                       |   |
| TMPRSS13 | Transmembrane protease, serine 13                                              |   |
| TNFRSF4  | Tumor necrosis factor receptor superfamily, member 4                           |   |
| TNIK     | TRAF2 and NCK interacting kinase                                               |   |
| TNK1     | Tyrosine kinase, non-receptor, 1                                               |   |
| TNKS     | Tankyrase, TRF1-interacting ankyrin-related ADP-ribose polymerase              |   |
| TNKS2    | Tankyrase, TRF1-interacting ankyrin-related ADP-ribose polymerase 2            |   |
| TNPO2    | Transportin 2                                                                  |   |
| TNR      | Tenascin R                                                                     |   |
| TNRC6C   | Trinucleotide repeat containing 6C                                             |   |
| TNS3     | Tensin 3                                                                       |   |
| TP53     | Tumor protein p53                                                              | √ |
| TP53I13  | Tumor protein p53 inducible protein 13                                         |   |
| TPD52L1  | Tumor protein D52-like 1                                                       |   |
| TPO      | Thyroid peroxidase                                                             |   |
| TPTE2P3  | Transmembrane phosphoinositide 3-phosphatase and tensin homolog 2 pseudogene 3 |   |
| TRAF4    | TNF receptor-associated factor 4                                               |   |
| TRAM2    | Translocation associated membrane protein 2                                    |   |
| TRAPPC4  | Trafficking protein particle complex 4                                         |   |
| TRAPPC6B | Trafficking protein particle complex 6B                                        |   |
| TRERF1   | Transcriptional regulating factor 1                                            |   |

|             |                                                                    |   |
|-------------|--------------------------------------------------------------------|---|
| TRHDE       | Thyrotropin-releasing hormone degrading enzyme                     |   |
| TRIM25      | Tripartite motif containing 25                                     |   |
| TRIM29      | Tripartite motif containing 29                                     |   |
| TRIM32      | Tripartite motif containing 32                                     |   |
| TRIM41      | Tripartite motif containing 41                                     |   |
| TRIM46      | Tripartite motif containing 46                                     |   |
| TRIM73      | Tripartite motif containing 73                                     |   |
| TRIO        | Trio Rho guanine nucleotide exchange factor                        |   |
| TRPC1       | Transient receptor potential cation channel, subfamily C, member 1 |   |
| TRPM6       | Transient receptor potential cation channel, subfamily M, member 6 |   |
| TRPV3       | Transient receptor potential cation channel, subfamily V, member 3 |   |
| TSC22D1     | TSC22 domain family, member 1                                      |   |
| TSC22D2     | TSC22 domain family, member 2                                      |   |
| TSHR        | Thyroid stimulating hormone receptor                               | √ |
| TSLP        | Thymic stromal lymphopoietin                                       |   |
| TSNARE1     | T-SNARE domain containing 1                                        |   |
| TSNAX-DISC1 | TSNAX-DISC1 readthrough (NMD candidate)                            |   |
| TSPAN10     | Tetraspanin 10                                                     |   |
| TSPAN13     | Tetraspanin 13                                                     |   |
| TSPAN3      | Tetraspanin 3                                                      |   |
| TSPYL6      | TSPY-like 6                                                        |   |
| TSTD2       | Thiosulfate sulfurtransferase (rhodanese)-like domain containing 2 |   |
| TTC39C      | Tetratricopeptide repeat domain 39C                                |   |
| TTC9        | Tetratricopeptide repeat domain 9                                  |   |
| TTL         | Tubulin tyrosine ligase                                            | √ |
| TTY22       | Testis-specific transcript, Y-linked 22 (non-protein coding)       |   |
| TUBGCP5     | Tubulin, gamma complex associated protein 5                        |   |
| TULP4       | Tubby like protein 4                                               |   |
| TUSC5       | Tumor suppressor candidate 5                                       |   |
| TWF2        | Twinfilin actin-binding protein 2                                  |   |
| TXLNG       | Taxilin gamma                                                      |   |



|         |                                                                       |  |
|---------|-----------------------------------------------------------------------|--|
| TXNDC15 | Thioredoxin domain containing 15                                      |  |
| U2AF2   | U2 small nuclear RNA auxiliary factor 2                               |  |
| UACA    | Uveal autoantigen with coiled-coil domains and ankyrin repeats        |  |
| UBA2    | Ubiquitin-like modifier activating enzyme 2                           |  |
| UBE2E2  | Ubiquitin-conjugating enzyme E2E 2                                    |  |
| UBE2F   | Ubiquitin-conjugating enzyme E2F (putative)                           |  |
| UBE2M   | Ubiquitin-conjugating enzyme E2M                                      |  |
| UBE2Q1  | Ubiquitin-conjugating enzyme E2Q family member 1                      |  |
| UBE4B   | Ubiquitination factor E4B                                             |  |
| UBFD1   | Ubiquitin family domain containing 1                                  |  |
| UBOX5   | U-box domain containing 5                                             |  |
| UBXN2A  | UBX domain protein 2A                                                 |  |
| UCKL1AS | UCKL1 antisense RNA 1                                                 |  |
| UGGT1   | UDP-glucose glycoprotein glucosyltransferase 1                        |  |
| UGGT2   | UDP-glucose glycoprotein glucosyltransferase 2                        |  |
| UHRF1   | Ubiquitin-like with PHD and ring finger domains 1                     |  |
| ULBP1   | UL16 binding protein 1                                                |  |
| UPK1B   | Uroplakin 1B                                                          |  |
| USP12   | Ubiquitin specific peptidase 12                                       |  |
| USP40   | Ubiquitin specific peptidase 40                                       |  |
| USP9Y   | Ubiquitin specific peptidase 9, Y-linked                              |  |
| VANGL1  | VANGL planar cell polarity protein 1                                  |  |
| VAPB    | VAMP (vesicle-associated membrane protein)-associated protein B and C |  |
| VARS2   | Valyl-tRNA synthetase 2, mitochondrial                                |  |
| VAV2    | Vav 2 guanine nucleotide exchange factor                              |  |
| VCAN    | Versican                                                              |  |
| VEZF1   | Vascular endothelial zinc finger 1                                    |  |
| VGLL3   | Vestigial-like family member 3                                        |  |
| VGLL4   | Vestigial-like family member 4                                        |  |
| VIPR2   | Vasoactive intestinal peptide receptor 2                              |  |
| VIT     | Vitrin                                                                |  |

|          |                                                                               |  |
|----------|-------------------------------------------------------------------------------|--|
| VKORC1L1 | Vitamin K epoxide reductase complex, subunit 1-like 1                         |  |
| VLDLR    | Very low density lipoprotein receptor                                         |  |
| VPS13D   | Vacuolar protein sorting 13 homolog D ( <i>S. cerevisiae</i> )                |  |
| VPS16    | Vacuolar protein sorting 16 homolog ( <i>S. cerevisiae</i> )                  |  |
| VPS28    | Vacuolar protein sorting 28 homolog ( <i>S. cerevisiae</i> )                  |  |
| VPS33A   | Vacuolar protein sorting 33 homolog A ( <i>S. cerevisiae</i> )                |  |
| VPS39    | Vacuolar protein sorting 39 homolog ( <i>S. cerevisiae</i> )                  |  |
| VPS4B    | Vacuolar protein sorting 4 homolog B ( <i>S. cerevisiae</i> )                 |  |
| VSTM2A   | V-set and transmembrane domain containing 2A                                  |  |
| VWA3B    | Von Willebrand factor A domain containing 3B                                  |  |
| WASF3    | WAS protein family, member 3                                                  |  |
| WASH2P   | WAS protein family homolog 2 pseudogene                                       |  |
| WASH7P   | WAS protein family homolog 7 pseudogene                                       |  |
| WBP2     | WW domain binding protein 2                                                   |  |
| WBSCR17  | Williams-Beuren syndrome chromosome region 17                                 |  |
| WDFY2    | WD repeat and FYVE domain containing 2                                        |  |
| WDFY4    | WDFY family member 4                                                          |  |
| WDR20    | WD repeat domain 20                                                           |  |
| WDR25    | WD repeat domain 25                                                           |  |
| WDR35    | WD repeat domain 35                                                           |  |
| WDR36    | WD repeat domain 36                                                           |  |
| WDR37    | WD repeat domain 37                                                           |  |
| WDR6     | WD repeat domain 6                                                            |  |
| WDR60    | WD repeat domain 60                                                           |  |
| WDR72    | WD repeat domain 72                                                           |  |
| WDR8     | WD repeat domain 8                                                            |  |
| WDR86    | WD repeat domain 86                                                           |  |
| WDR90    | WD repeat domain 90                                                           |  |
| WFDC5    | WAP four-disulfide core domain 5                                              |  |
| WFIKKN1  | WAP, follistatin/kazal, immunoglobulin, kunitz and netrin domain containing 1 |  |
| WHSC2    | Negative elongation factor complex member A                                   |  |

|         |                                                        |  |
|---------|--------------------------------------------------------|--|
| WIZ     | Widely interspaced zinc finger motifs                  |  |
| WSB2    | WD repeat and SOCS box containing 2                    |  |
| WWC2    | WW and C2 domain containing 2                          |  |
| XDH     | Xanthine dehydrogenase                                 |  |
| XPA     | Xeroderma pigmentosum, complementation group A         |  |
| XPNPEP3 | X-prolyl aminopeptidase (aminopeptidase P) 3, putative |  |
| XYLB    | Xylulokinase homolog (H. influenzae)                   |  |
| YEATS2  | YEATS domain containing 2                              |  |
| YPEL4   | Yippee-like 4 (Drosophila)                             |  |
| ZACN    | Zinc activated ligand-gated ion channel                |  |
| ZADH2   | Zinc binding alcohol dehydrogenase domain containing 2 |  |
| ZAN     | Zonadhesin                                             |  |
| ZAP70   | Zeta-chain (TCR) associated protein kinase 70kDa       |  |
| ZBTB32  | Zinc finger and BTB domain containing 32               |  |
| ZBTB4   | Zinc finger and BTB domain containing 4                |  |
| ZBTB41  | Zinc finger and BTB domain containing 41               |  |
| ZBTB47  | Zinc finger and BTB domain containing 47               |  |
| ZBTB49  | Zinc finger and BTB domain containing 49               |  |
| ZC3H12C | Zinc finger CCCH-type containing 12C                   |  |
| ZC3H7B  | Zinc finger CCCH-type containing 7B                    |  |
| ZCCHC11 | Zinc finger, CCHC domain containing 11                 |  |
| ZCCHC18 | Zinc finger, CCHC domain containing 18                 |  |
| ZDHHC3  | Zinc finger, DHHC-type containing 3                    |  |
| ZDHHC6  | Zinc finger, DHHC-type containing 6                    |  |
| ZER1    | Zyg-11 related, cell cycle regulator                   |  |
| ZFAND2A | Zinc finger, AN1-type domain 2A                        |  |
| ZFP106  | Zinc finger protein 106 homolog (mouse)                |  |
| ZFP41   | ZFP41 zinc finger protein                              |  |
| ZFP64   | ZFP64 zinc finger protein                              |  |
| ZFYVE19 | Zinc finger, FYVE domain containing 19                 |  |
| ZFYVE21 | Zinc finger, FYVE domain containing 21                 |  |

|         |                                        |  |
|---------|----------------------------------------|--|
| ZFYVE27 | Zinc finger, FYVE domain containing 27 |  |
| ZFYVE28 | Zinc finger, FYVE domain containing 28 |  |
| ZMIZ1   | Zinc finger, MIZ-type containing 1     |  |
| ZMIZ2   | Zinc finger, MIZ-type containing 2     |  |
| ZMYM2   | Zinc finger, MYM-type 2                |  |
| ZNF131  | Zinc finger protein 131                |  |
| ZNF160  | Zinc finger protein 160                |  |
| ZNF2    | Zinc finger protein 2                  |  |
| ZNF205  | Zinc finger protein 205                |  |
| ZNF207  | Zinc finger protein 207                |  |
| ZNF263  | Zinc finger protein 263                |  |
| ZNF273  | Zinc finger protein 273                |  |
| ZNF275  | Zinc finger protein 275                |  |
| ZNF280B | Zinc finger protein 280B               |  |
| ZNF3    | Zinc finger protein 3                  |  |
| ZNF324B | Zinc finger protein 324B               |  |
| ZNF33B  | Zinc finger protein 33B                |  |
| ZNF416  | Zinc finger protein 416                |  |
| ZNF426  | Zinc finger protein 426                |  |
| ZNF445  | Zinc finger protein 445                |  |
| ZNF517  | Zinc finger protein 517                |  |
| ZNF530  | Zinc finger protein 530                |  |
| ZNF562  | Zinc finger protein 562                |  |
| ZNF568  | Zinc finger protein 568                |  |
| ZNF587  | Zinc finger protein 587                |  |
| ZNF592  | Zinc finger protein 592                |  |
| ZNF618  | Zinc finger protein 618                |  |
| ZNF687  | Zinc finger protein 687                |  |
| ZNF697  | Zinc finger protein 697                |  |
| ZNF773  | Zinc finger protein 773                |  |
| ZNF787  | Zinc finger protein 787                |  |

|        |                                                     |  |
|--------|-----------------------------------------------------|--|
| ZNF839 | Zinc finger protein 839                             |  |
| ZNF862 | Zinc finger protein 862                             |  |
| ZNRF1  | Zinc and ring finger 1, E3 ubiquitin protein ligase |  |
| ZNRF3  | Zinc and ring finger 3                              |  |
| ZXDC   | ZXD family zinc finger C                            |  |
| ZZEF1  | Zinc finger, ZZ-type with EF-hand domain 1          |  |
|        |                                                     |  |

**Supplementary Table 12. Predicted targets of hsa-miR-181a-3p by DIANA microT v 5.0**

| <b>Gene name</b> | <b>Full name</b>                                                                     | <b>miTG score</b> | <b>Cancer gene</b> |
|------------------|--------------------------------------------------------------------------------------|-------------------|--------------------|
| AC090772.9       | Uncharacterized protein ENSP00000383318 fragment                                     | 0.562             |                    |
| AC092031.1       | Chromosome 7 open reading frame 76                                                   | 0.47              |                    |
| AC137600.1       | Putative uncharacterized protein ENSP00000409039 fragment                            | 0.5               |                    |
| AFF4             | AF4/FMR2 family, member 4                                                            | 0.465             |                    |
| AGPAT4           | 1-Acylglycerol-3-phosphate O-acyltransferase 4                                       | 0.583             |                    |
| ALG8             | $\alpha$ 1,3-Glucosyltransferase                                                     | 0.567             |                    |
| ANKRD13C         | Ankyrin repeat domain 13C                                                            | 0.466             |                    |
| APTX             | Aprataxin                                                                            | 0.453             |                    |
| AREG             | Amphiregulin                                                                         | 0.455             |                    |
| ARIH2            | Ariadne RBR E3 ubiquitin protein ligase 2                                            | 0.465             |                    |
| ARL4A            | ADP-ribosylation factor-like 4A                                                      | 0.685             |                    |
| ARL4C            | ADP-ribosylation factor-like 4C                                                      | 0.484             |                    |
| ARMC4            | Armadillo repeat containing 4                                                        | 0.576             |                    |
| ARNTL            | Aryl hydrocarbon receptor nuclear translocator-like                                  | 0.476             |                    |
| ARPP21           | cAMP-regulated phosphoprotein, 21 kDa                                                | 0.544             |                    |
| <b>ASPSCR1</b>   | <b>Alveolar soft part sarcoma chromosome region, candidate 1</b>                     | <b>0.459</b>      | <b>√</b>           |
| ATP5E            | ATP synthase, H <sup>+</sup> transporting, mitochondrial F1 complex, epsilon subunit | 0.47              |                    |
| ATP6V1B2         | ATPase, H <sup>+</sup> transporting, lysosomal 56/58 kDa, V1 subunit B2              | 0.47              |                    |
| B3GAT2           | $\beta$ 1,3-Glucuronyltransferase 2 (glucuronosyltransferase S)                      | 0.509             |                    |
| BACE2            | $\beta$ -Site APP-cleaving enzyme 2                                                  | 0.474             |                    |
| BAHCC1           | BAH domain and coiled-coil containing 1                                              | 0.456             |                    |
| <b>BCL11A</b>    | <b>B-cell CLL/lymphoma 11A (zinc finger protein)</b>                                 | <b>0.496</b>      | <b>√</b>           |
| BTC              | Betacellulin                                                                         | 0.517             |                    |
| C11orf57         | Chromosome 11 open reading frame 57                                                  | 0.564             |                    |
| C14orf28         | Chromosome 14 open reading frame 28                                                  | 0.63              |                    |
| C15orf41         | Chromosome 15 open reading frame 41                                                  | 0.495             |                    |
| C2               | Complement component 2                                                               | 0.455             |                    |
| CA1              | Carbonic anhydrase I                                                                 | 0.476             |                    |
| CA5B             | Carbonic anhydrase VB, mitochondrial                                                 | 0.466             |                    |

|          |                                                                   |       |   |
|----------|-------------------------------------------------------------------|-------|---|
| CACNA1D  | Calcium channel, voltage-dependent, L type, alpha 1D subunit      | 0.543 | √ |
| CALM1    | Calmodulin 1 (phosphorylase kinase, delta)                        | 0.48  |   |
| CBX5     | c-Chromobox homolog 5                                             | 0.607 |   |
| CCDC113  | Coiled-coil domain containing 113                                 | 0.533 |   |
| CCND2    | Cyclin D2                                                         | 0.512 | √ |
| CCNL1    | Cyclin L1                                                         | 0.705 |   |
| CCT7     | Chaperonin containing TCP1, subunit 7 (eta)                       | 0.503 |   |
| CDC42EP3 | CDC42 effector protein (Rho GTPase binding) 3                     | 0.472 |   |
| CDK5RAP3 | CDK5 regulatory subunit associated protein 3                      | 0.564 |   |
| CDK9     | Cyclin-dependent kinase 9                                         | 0.483 |   |
| CENPJ    | Centromere protein J                                              | 0.467 |   |
| CEP57L1  | Centrosomal protein 57 kDa-like 1                                 | 0.481 |   |
| CERKL    | Ceramide kinase-like                                              | 0.485 |   |
| CERS6    | Ceramide synthase 6                                               | 0.453 |   |
| CHIC1    | Cysteine-rich hydrophobic domain 1                                | 0.479 |   |
| CHMP4B   | Charged multivesicular body protein 4B                            | 0.451 |   |
| CHTF8    | CTF8, chromosome transmission fidelity factor 8 homolog           | 0.47  |   |
| CILP2    | Cartilage intermediate layer protein 2                            | 0.478 |   |
| CKB      | Creatine kinase, brain                                            | 0.462 |   |
| CLDN12   | Claudin 12                                                        | 0.453 |   |
| CLEC2D   | C-type lectin domain family 2, member D                           | 0.463 |   |
| CMAS     | Cytidine monophosphate <i>N</i> -acetylneuraminic acid synthetase | 0.456 |   |
| CNBP     | CCHC-type zinc finger, nucleic acid binding protein               | 0.496 |   |
| CNGB3    | Cyclic nucleotide gated channel b3                                | 0.481 |   |
| COL11A1  | Collagen, type XI, a1                                             | 0.464 |   |
| COL9A2   | Collagen, type IX, a2                                             | 0.48  |   |
| COMP     | Cartilage oligomeric matrix protein                               | 0.557 |   |
| COQ6     | Coenzyme Q6 monooxygenase                                         | 0.458 |   |
| CPED1    | Cadherin-like and PC-esterase domain containing 1                 | 0.451 |   |
| CPNE4    | Copine IV                                                         | 0.532 |   |
| CPS1     | Carbamoyl-phosphate synthase 1, mitochondrial                     | 0.466 |   |
| CPSF3L   | Cleavage and polyadenylation specific factor 3-like               | 0.49  |   |
| CPZ      | Carboxypeptidase Z                                                | 0.458 |   |

|              |                                                                  |              |          |
|--------------|------------------------------------------------------------------|--------------|----------|
| CTB-50L17.10 | Hepatoma-derived growth factor-related protein 2                 | 0.454        |          |
| CTC-550B14.6 | CTC-550B14.6                                                     | 0.467        |          |
| CTLA4        | Cytotoxic T-lymphocyte-associated protein 4                      | 0.454        |          |
| CX3CR1       | Chemokine (C-X3-C motif) receptor 1                              | 0.465        |          |
| CYFIP2       | Cytoplasmic FMR1 interacting protein 2                           | 0.478        |          |
| CYTL1        | Cytokine-like 1                                                  | 0.456        |          |
| DCUN1D2      | DCN1, defective in cullin neddylation 1, domain containing 2     | 0.494        |          |
| DGKA         | Diacylglycerol kinase, alpha 80kDa                               | 0.669        |          |
| DHX35        | DEAH (Asp-Glu-Ala-His) box polypeptide 35                        | 0.631        |          |
| DNAH6        | Dynein, axonemal, heavy chain 6                                  | 0.586        |          |
| DOCK1        | Dedicator of cytokinesis 1                                       | 0.472        |          |
| DOCK5        | Dedicator of cytokinesis 5                                       | 0.496        |          |
| DRAXIN       | Dorsal inhibitory axon guidance protein                          | 0.599        |          |
| DUSP18       | Dual specificity phosphatase 18                                  | 0.452        |          |
| DUSP23       | Dual specificity phosphatase 23                                  | 0.482        |          |
| EGR2         | Early growth response 2                                          | 0.452        |          |
| <b>ELN</b>   | <b>Elastin</b>                                                   | <b>0.516</b> | <b>√</b> |
| EMC4         | ER membrane protein complex subunit 4                            | 0.594        |          |
| ENPP2        | Ectonucleotide pyrophosphatase/phosphodiesterase 2               | 0.502        |          |
| ESCO1        | Establishment of sister chromatid cohesion N-acetyltransferase 1 | 0.493        |          |
| ETF1         | Eukaryotic translation termination factor 1                      | 0.523        |          |
| <b>ETV1</b>  | <b>Ets variant 1</b>                                             | <b>0.471</b> | <b>√</b> |
| <b>EZH2</b>  | <b>Enhancer of zeste 2 polycomb repressive complex 2 subunit</b> | <b>0.567</b> | <b>√</b> |
| FAIM2        | Fas apoptotic inhibitory molecule 2                              | 0.481        |          |
| FAM122B      | Family with sequence similarity 122B                             | 0.694        |          |
| FAM131B      | Family with sequence similarity 131, member B                    | 0.492        |          |
| FAM190A      | Coiled-coil serine-rich protein 1                                | 0.471        |          |
| FIBP         | Fibroblast growth factor (acidic) intracellular binding protein  | 0.451        |          |
| FLYWCH1      | FLYWCH-type zinc finger 1                                        | 0.634        |          |
| FOXP1        | Forkhead box N1                                                  | 0.516        |          |
| <b>GATA3</b> | <b>GATA binding protein 3</b>                                    | <b>0.45</b>  | <b>√</b> |
| GATSL3       | GATS protein-like 3                                              | 0.456        |          |
| GGCT         | Gamma-glutamylcyclotransferase                                   | 0.581        |          |



|           |                                                                             |       |   |
|-----------|-----------------------------------------------------------------------------|-------|---|
| GHITM     | Growth hormone inducible transmembrane protein                              | 0.454 |   |
| GMPPB     | GDP-mannose pyrophosphorylase B                                             | 0.46  |   |
| GOLGA1    | Golgin A1                                                                   | 0.491 |   |
| GOLGB1    | Golgin B1                                                                   | 0.503 |   |
| GRASP     | GRP1 (general receptor for phosphoinositides 1)-associated scaffold protein | 0.459 |   |
| GULP1     | GULP, engulfment adaptor PTB domain containing 1                            | 0.557 |   |
| HEBP2     | Heme binding protein 2                                                      | 0.92  |   |
| HEPACAM2  | HEPACAM family member 2                                                     | 0.461 |   |
| HIP1      | Huntingtin interacting protein 1                                            | 0.457 | √ |
| HOPX      | HOP homeobox                                                                | 0.468 |   |
| HRAS      | Harvey rat sarcoma viral oncogene homolog                                   | 0.463 | √ |
| HSPE1     | Heat shock 10 kDa protein 1                                                 | 0.532 |   |
| IFT80     | Intraflagellar transport 80                                                 | 0.451 |   |
| ING4      | Inhibitor of growth family, member 4                                        | 0.516 |   |
| IRS1      | Insulin receptor substrate 1                                                | 0.462 |   |
| JMJD1C    | Jumonji domain containing 1C                                                | 0.497 |   |
| KCNA3     | Potassium voltage-gated channel, shaker-related subfamily, member 3         | 0.486 |   |
| KCND3     | Potassium voltage-gated channel, Shal-related subfamily, member 3           | 0.471 |   |
| KIAA0226  | KIAA0226                                                                    | 0.471 |   |
| KIAA0895L | KIAA0895-like                                                               | 0.493 |   |
| KSR2      | Kinase suppressor of ras 2                                                  | 0.478 |   |
| LAPTM4A   | Lysosomal protein transmembrane 4a                                          | 0.468 |   |
| LDLRAD2   | Low density lipoprotein receptor class A domain containing 2                | 0.459 |   |
| LGI2      | Leucine-rich repeat LGI family, member 2                                    | 0.463 |   |
| LGMN      | Legumain                                                                    | 0.513 |   |
| LMO3      | LIM domain only 3 (rhombotin-like 2)                                        | 0.688 |   |
| LSM14B    | LSM14B, SCD6 homolog B ( <i>S. cerevisiae</i> )                             | 0.538 |   |
| LYPD6     | LY6/PLAUR domain containing 6                                               | 0.469 |   |
| MAPRE2    | Microtubule-associated protein, RP/EB family, member 2                      | 0.462 |   |
| MARK2     | MAP/microtubule affinity-regulating kinase 2                                | 0.475 |   |
| MCOLN3    | Mucolipin 3                                                                 | 0.464 |   |
| MED1      | Mediator complex subunit 1                                                  | 0.584 |   |
| MEGF8     | Multiple EGF-like-domains 8                                                 | 0.461 |   |

|             |                                                                                                |              |          |
|-------------|------------------------------------------------------------------------------------------------|--------------|----------|
| MIER3       | Mesoderm induction early response 1, family member 3                                           | 0.5          |          |
| MKNK2       | MAP kinase interacting serine/threonine kinase 2                                               | 0.532        |          |
| MMP16       | Matrix metalloproteinase 16 (membrane-inserted)                                                | 0.504        |          |
| MPZL1       | Myelin protein zero-like 1                                                                     | 0.473        |          |
| MRPS35      | Mitochondrial ribosomal protein S35                                                            | 0.684        |          |
| <b>MSI2</b> | <b>Musashi RNA-binding protein 2</b>                                                           | <b>0.451</b> | <b>√</b> |
| MTMR8       | Myotubularin related protein 8                                                                 | 0.488        |          |
| MUSTN1      | Musculoskeletal, embryonic nuclear protein 1                                                   | 0.608        |          |
| NARG2       | Interactor of little elongator complex ELL subunit 2                                           | 0.485        |          |
| NIPA1       | Non imprinted in Prader-Willi/Angelman syndrome 1                                              | 0.485        |          |
| NKAIN1      | Na <sup>+</sup> /K <sup>+</sup> transporting ATPase interacting 1                              | 0.633        |          |
| NT5C3       | 5'-Nucleotidase, cytosolic IIIA                                                                | 0.513        |          |
| NUB1        | Negative regulator of ubiquitin-like proteins 1                                                | 0.498        |          |
| NUDT16      | Nudix (nucleoside diphosphate linked moiety X)-type motif 16                                   | 0.454        |          |
| ODZ1        | Teneurin transmembrane protein 1                                                               | 0.471        |          |
| OLFM1       | Olfactomedin 1                                                                                 | 0.475        |          |
| OTUD6B      | OTU domain containing 6B                                                                       | 0.512        |          |
| OXSM        | 3-Oxoacyl-ACP synthase, mitochondrial                                                          | 0.453        |          |
| PALM2-AKAP2 | PALM2-AKAP2 readthrough                                                                        | 0.525        |          |
| PAPLN       | Papilin, proteoglycan-like sulfated glycoprotein                                               | 0.479        |          |
| PARP15      | Poly (ADP-ribose) polymerase family, member 15                                                 | 0.458        |          |
| PDE1B       | Phosphodiesterase 1B, calmodulin-dependent                                                     | 0.581        |          |
| PDE8B       | Phosphodiesterase 8B                                                                           | 0.47         |          |
| PDGFD       | Platelet derived growth factor D                                                               | 0.454        |          |
| PDS5B       | PDS5, regulator of cohesion maintenance, homolog B ( <i>S. cerevisiae</i> )                    | 0.492        |          |
| PIAS3       | Protein inhibitor of activated STAT, 3                                                         | 0.456        |          |
| <b>PIM1</b> | <b>Pim-1 proto-oncogene, serine/threonine kinase</b>                                           | <b>0.538</b> | <b>√</b> |
| POU4F2      | POU class 4 homeobox 2                                                                         | 0.588        |          |
| PPFIA4      | Protein tyrosine phosphatase, receptor type, f polypeptide (PTPRF), interacting protein (lipri | 0.467        |          |
| PPIL2       | Peptidylprolyl isomerase (cyclophilin)-like 2                                                  | 0.478        |          |
| PPP1CC      | Protein phosphatase 1, catalytic subunit, gamma isozyme                                        | 0.482        |          |
| PPP2R5D     | Protein phosphatase 2, regulatory subunit B', delta                                            | 0.517        |          |

|               |                                                                                         |       |  |
|---------------|-----------------------------------------------------------------------------------------|-------|--|
| PRAMEF1       | PRAME family member 1                                                                   | 0.528 |  |
| PRAMEF4       | PRAME family member 4                                                                   | 0.624 |  |
| PRAMEF9       | PRAME family member 9                                                                   | 0.624 |  |
| PSG4          | Pregnancy specific b-1-glycoprotein 4                                                   | 0.596 |  |
| PSMC5         | Proteasome (prosome, macropain) 26S subunit, ATPase, 5                                  | 0.538 |  |
| PTPN5         | Protein tyrosine phosphatase, non-receptor type 5 (striatum-enriched)                   | 0.572 |  |
| RAB3B         | RAB3B, member RAS oncogene family                                                       | 0.581 |  |
| RABGEF1       | RAB guanine nucleotide exchange factor (GEF) 1                                          | 0.603 |  |
| RAC2          | Ras-related C3 botulinum toxin substrate 2 (rho family, small GTP binding protein Rac2) | 0.547 |  |
| RASSF2        | Ras association (RalGDS/AF-6) domain family member 2                                    | 0.519 |  |
| RBMY1A1       | RNA binding motif protein, Y-linked, family 1, member A1                                | 0.493 |  |
| RBMY1J        | RNA-binding motif protein, Y chromosome, family 1 member F/J (Y chromosome RNA rec      | 0.466 |  |
| RC3H2         | Ring finger and CCCH-type domains 2                                                     | 0.629 |  |
| REPS2         | RALBP1 associated Eps domain containing 2                                               | 0.453 |  |
| RGPD6         | RANBP2-like and GRIP domain containing 6                                                | 0.673 |  |
| RNASEH2C      | Ribonuclease H2, subunit C                                                              | 0.49  |  |
| RNF165        | Ring finger protein 165                                                                 | 0.528 |  |
| RP11-113D6.10 | Solute carrier family 25, member 51 pseudogene                                          | 0.631 |  |
| RP11-51F16.8  | RP11-51F16.8                                                                            | 0.512 |  |
| RPL14         | Ribosomal protein L14                                                                   | 0.458 |  |
| RPTOR         | Regulatory associated protein of MTOR, complex 1                                        | 0.461 |  |
| RUVBL1        | RuvB-like AAA ATPase 1                                                                  | 0.564 |  |
| RYR2          | Ryanodine receptor 2 (cardiac)                                                          | 0.568 |  |
| SAMD12        | Sterile alpha motif domain containing 12                                                | 0.462 |  |
| SCN2A         | Sodium channel, voltage-gated, type II, alpha subunit                                   | 0.514 |  |
| SCNM1         | Sodium channel modifier 1                                                               | 0.529 |  |
| SCNN1D        | Sodium channel, non-voltage-gated 1, delta subunit                                      | 0.464 |  |
| SCPEP1        | Serine carboxypeptidase 1                                                               | 0.474 |  |
| SEC14L4       | SEC14-like 4 ( <i>S. cerevisiae</i> )                                                   | 0.456 |  |
| SENP1         | SUMO1/sentrin specific peptidase 1                                                      | 0.477 |  |
| SENP5         | SUMO1/sentrin specific peptidase 5                                                      | 0.463 |  |
| SKA1          | Spindle and kinetochore associated complex subunit 1                                    | 0.482 |  |
| SLC26A4       | Solute carrier family 26 (anion exchanger), member 4                                    | 0.479 |  |

|             |                                                                                              |              |          |
|-------------|----------------------------------------------------------------------------------------------|--------------|----------|
| SLC38A7     | Solute carrier family 38, member 7                                                           | 0.487        |          |
| SLC6A6      | Solute carrier family 6 (neurotransmitter transporter), member 6                             | 0.513        |          |
| SLC7A11     | Solute carrier family 7 (anionic amino acid transporter light chain, xc- system), member 11  | 0.63         |          |
| SMG1        | SMG1 phosphatidylinositol 3-kinase-related kinase                                            | 0.499        |          |
| SNHG16      | Small nucleolar RNA host gene 16 (non-protein coding)                                        | 0.616        |          |
| SPACA5B     | Sperm acrosome associated 5B                                                                 | 0.483        |          |
| ST6GALNAC3  | ST6 (a-N -acetyl-neuraminyl-2,3-b-galactosyl-1,3)-N -acetylgalactosaminide a-2,6-sialyltrans | 0.467        |          |
| STT3B       | STT3B, subunit of the oligosaccharyltransferase complex                                      | 0.464        |          |
| STX7        | Syntaxin 7                                                                                   | 0.454        |          |
| SURF4       | Surfeit 4                                                                                    | 0.486        |          |
| SYNPO2L     | Synaptopodin 2-like                                                                          | 0.46         |          |
| SYTL2       | Synaptotagmin-like 2                                                                         | 0.464        |          |
| TBC1D21     | TBC1 domain family, member 21                                                                | 0.462        |          |
| TBC1D28     | TBC1 domain family, member 28                                                                | 0.498        |          |
| TBX2        | T-box 2                                                                                      | 0.556        |          |
| TCP11L2     | T-complex 11, testis-specific-like 2                                                         | 0.5          |          |
| TEX261      | Testis expressed 261                                                                         | 0.487        |          |
| TIRAP       | Toll-interleukin 1 receptor (TIR) domain containing adaptor protein                          | 0.49         |          |
| TLE4        | Transducin-like enhancer of split 4                                                          | 0.501        |          |
| TMEM138     | Transmembrane protein 138                                                                    | 0.456        |          |
| TMEM194A    | Transmembrane protein 194A                                                                   | 0.478        |          |
| TMEM248     | Transmembrane protein 248                                                                    | 0.472        |          |
| TMEM80      | Transmembrane protein 80                                                                     | 0.517        |          |
| TMOD3       | Tropomodulin 3 (ubiquitous)                                                                  | 0.477        |          |
| TNFSF9      | Tumor necrosis factor (ligand) superfamily, member 9                                         | 0.458        |          |
| TP53INP1    | Tumor protein p53 inducible nuclear protein 1                                                | 0.492        |          |
| TRIO        | Trio Rho guanine nucleotide exchange factor                                                  | 0.472        |          |
| TRPV4       | Transient receptor potential cation channel, subfamily V, member 4                           | 0.481        |          |
| <b>TSHR</b> | <b>Thyroid stimulating hormone receptor</b>                                                  | <b>0.506</b> | <b>√</b> |
| TSPAN7      | Tetraspanin 7                                                                                | 0.543        |          |
| TTC33       | Tetratricopeptide repeat domain 33                                                           | 0.506        |          |
| TTLL5       | Tubulin tyrosine ligase-like family, member 5                                                | 0.495        |          |
| TUBA1C      | LSM14B, SCD6 homolog B ( <i>S. cerevisiae</i> )                                              | 0.537        |          |

|         |                                                              |       |   |
|---------|--------------------------------------------------------------|-------|---|
| UBE2Q1  | Ubiquitin-conjugating enzyme E2Q family member 1             | 0.464 |   |
| ULK3    | Unc-51 like kinase 3                                         | 0.555 |   |
| UQCRB   | Ubiquinol-cytochrome c reductase binding protein             | 0.456 |   |
| USP10   | Ubiquitin specific peptidase 10                              | 0.516 |   |
| USP6    | Ubiquitin specific peptidase 6                               | 0.503 | √ |
| VAMP7   | Vesicle-associated membrane protein 7                        | 0.455 |   |
| VPS33B  | Vacuolar protein sorting 33 homolog B (yeast)                | 0.466 |   |
| VPS54   | Vacuolar protein sorting 54 homolog ( <i>S. cerevisiae</i> ) | 0.517 |   |
| WIF1    | WNT inhibitory factor 1                                      | 0.518 | √ |
| WNT3    | Wingless-type MMTV integration site family, member 3         | 0.478 |   |
| XPR1    | Xenotropic and polytropic retrovirus receptor 1              | 0.516 |   |
| YIF1A   | Yip1 interacting factor homolog A ( <i>S. cerevisiae</i> )   | 0.464 |   |
| YIPF3   | Yip1 domain family, member 3                                 | 0.515 |   |
| YSK4    | Mitogen-activated protein kinase kinase kinase 19            | 0.468 |   |
| YY1     | YY1 transcription factor                                     | 0.487 |   |
| ZDHHC14 | Zinc finger, DHHC-type containing 14                         | 0.519 |   |
| ZNF197  | Zinc finger protein 197                                      | 0.464 |   |
| ZNF2    | Zinc finger protein 2                                        | 0.554 |   |
| ZNF423  | Zinc finger protein 423                                      | 0.523 |   |
| ZNF561  | Zinc finger protein 561                                      | 0.496 |   |
| ZNF732  | Zinc finger protein 732                                      | 0.493 |   |
| ZNF746  | Zinc finger protein 746                                      | 0.514 |   |
| ZNF812  | Zinc finger protein 812                                      | 0.48  |   |

**Supplementary Table 14. Predicted targets of hsa-miR-181a-3p by miRanda-mirSVR that are cancer genes.**

| <b>Gene symbol</b> | <b>Full name</b>                                                    |
|--------------------|---------------------------------------------------------------------|
| ABI2               | Abl-interactor 1                                                    |
| ATM                | ATM serine/threonine kinase                                         |
| AXIN1              | Axin 1                                                              |
| BCL11A             | B-cell CLL/lymphoma 11A                                             |
| BCL2               | B-cell CLL/lymphoma 2                                               |
| BTG1               | B-cell translocation gene 1, anti-proliferative                     |
| CACNA1D            | Calcium channel, voltage-dependent, L type, $\alpha$ 1D subunit     |
| CASP8              | Caspase 8, apoptosis-related cysteine peptidase                     |
| CDH1               | Cadherin 1, type 1, E-cadherin (epithelial)                         |
| CDK12              | Cyclin-dependent kinase 12                                          |
| CEBPA              | CCAAT/enhancer binding protein (C/EBP), $\alpha$                    |
| CHCHD7             | Coiled-coil-helix-coiled-coil-helix domain containing 7             |
| CREB1              | cAMP responsive element binding protein 1                           |
| CRTC3              | CREB regulated transcription coactivator 3                          |
| DDB2               | Damage-specific DNA binding protein 2, 48 kDa                       |
| DDX10              | DEAD (Asp-Glu-Ala-Asp) box polypeptide 10                           |
| DNM2               | Dynamin 2                                                           |
| DUX4               | Double homeobox 4                                                   |
| EBF1               | Early B-cell factor 1                                               |
| EIF4A2             | Eukaryotic translation initiation factor 4A2                        |
| ELL                | Elongation factor RNA polymerase II                                 |
| ETV6               | Ets variant 6                                                       |
| EZH2               | Enhancer of zeste 2 polycomb repressive complex 2 subunit           |
| FOXP1              | Forkhead box P1                                                     |
| GAS7               | Growth arrest-specific 7                                            |
| GATA3              | GATA binding protein 3                                              |
| GNA11              | Guanine nucleotide binding protein (G protein), alpha 11 (Gq class) |
| GNAS               | GNAS complex locus                                                  |
| HIP1               | Huntingtin interacting protein 1                                    |

|          |                                                                                                   |
|----------|---------------------------------------------------------------------------------------------------|
| LMO1     | LIM domain only 1 (rhombotin 1)                                                                   |
| LPP      | LIM domain containing preferred translocation partner in lipoma                                   |
| MALAT1   | Metastasis associated lung adenocarcinoma transcript 1 (non-protein coding)                       |
| MAX      | MYC associated factor X                                                                           |
| MKL1     | Megakaryoblastic leukemia (translocation) 1                                                       |
| MLL3     | Myeloid/lymphoid or mixed-lineage leukemia 3                                                      |
| MLLT1    | Myeloid/lymphoid or mixed-lineage leukemia (trithorax homolog, Drosophila); translocated to, 1    |
| MN1      | Meningioma (disrupted in balanced translocation) 1                                                |
| MSI2     | Musashi RNA-binding protein 2                                                                     |
| NF1      | Neurofibromin 1                                                                                   |
| PAFAH1B2 | Platelet-activating factor acetylhydrolase 1b, catalytic subunit 2 (30 kDa)                       |
| PAX5     | Paired box 5                                                                                      |
| PAX7     | Paired box 7                                                                                      |
| PDE4DIP  | Phosphodiesterase 4D interacting protein                                                          |
| PER1     | Period circadian clock 1                                                                          |
| PIM1     | Pim-1 proto-oncogene, serine/threonine kinase                                                     |
| PML      | Promyelocytic leukemia                                                                            |
| PTEN     | Phosphatase and tensin homolog                                                                    |
| RANBP17  | RAN binding protein 17                                                                            |
| RPL10    | Ribosomal protein L10                                                                             |
| SEPT6    | Septin 6                                                                                          |
| SET      | SET nuclear proto-oncogene                                                                        |
| SETBP1   | SET binding protein 1                                                                             |
| SMARCE1  | SWI/SNF related, matrix associated, actin dependent regulator of chromatin, subfamily e, member 1 |
| SS18L1   | Synovial sarcoma translocation gene on chromosome 18-like 1                                       |
| TAL1     | T-cell acute lymphocytic leukemia 1                                                               |
| TBL1XR1  | Transducin $\beta$ -like 1 X-linked receptor 1                                                    |
| TCL6     | T-cell leukemia/lymphoma 6 (non-protein coding)                                                   |
| TET2     | Tet methylcytosine dioxygenase 2                                                                  |
| TP53     | Tumour protein p53                                                                                |

|      |                                      |
|------|--------------------------------------|
| TSHR | Thyroid stimulating hormone receptor |
| TTL  | Tubulin tyrosine ligase              |



**Supplementary Table 15. Predicted targets of hsa-miR-181a-3p by miRDB.**

| <b>Gene symbol</b> | <b>Full name</b>                                             | <b>Target score</b> | <b>Cancer gene</b> |
|--------------------|--------------------------------------------------------------|---------------------|--------------------|
| ACAP2              | ArfGAP with coiled-coil, ankyrin repeat and PH domains 2     | 51                  | ×                  |
| ACTR3              | ARP3 actin-related protein 3 homolog (yeast)                 | 54                  | ×                  |
| AFF2               | AF4/FMR2 family, member 2                                    | 52                  | ×                  |
| ALDH18A1           | Aldehyde dehydrogenase 18 family, member A1                  | 79                  | ×                  |
| ALDH6A1            | Aldehyde dehydrogenase 6 family, member A1                   | 71                  | ×                  |
| AP1S3              | Adaptor-related protein complex 1, sigma 3 subunit           | 59                  | ×                  |
| ARL4A              | ADP-ribosylation factor-like 4A                              | 58                  | ×                  |
| ATP13A4            | ATPase type 13A4                                             | 72                  | ×                  |
| C14orf28           | Chromosome 14 open reading frame 28                          | 65                  | ×                  |
| C16orf57           | Chromosome 16 open reading frame 57                          | 70                  | ×                  |
| CFL2               | Cofilin 2 (muscle)                                           | 63                  | ×                  |
| CLEC2D             | C-type lectin domain family 2, member D                      | 53                  | ×                  |
| H1F0               | H1 histone family, member 0                                  | 59                  | ×                  |
| KCTD12             | Potassium channel tetramerisation domain containing 12       | 50                  | ×                  |
| MIER1              | Mesoderm induction early response 1 homolog (Xenopus laevis) | 56                  | ×                  |
| NIPA2              | Non imprinted in Prader-Willi/Angelman syndrome 2            | 69                  | ×                  |
| RABGEF1            | RAB guanine nucleotide exchange factor (GEF) 1               | 50                  | ×                  |
| RBM22              | RNA binding motif protein 22                                 | 56                  | ×                  |
| RHOBTB1            | Rho-related BTB domain containing 1                          | 62                  | ×                  |
| RIBC1              | RIB43A domain with coiled-coils 1                            | 67                  | ×                  |
| SLC20A2            | Solute carrier family 20 (phosphate transporter), member 2   | 67                  | ×                  |
| ZNF3               | Zinc finger protein 3                                        | 62                  | ×                  |

**Supplementary Table 16. Predicted targets of hsa-miR-181a-3p by RNA22 v2.**

| <b>Gene symbol</b> | <b>Full name</b>                                                                                    | <b>Cancer gene</b> |
|--------------------|-----------------------------------------------------------------------------------------------------|--------------------|
| AAGAB              | a and g-Adaptin binding protein                                                                     |                    |
| ABCA1              | ATP-binding cassette, sub-family A (ABC1), member 1                                                 |                    |
| ABCA13             | ATP-binding cassette, sub-family A (ABC1), member 13                                                |                    |
| ABCA6              | ATP-binding cassette, sub-family A (ABC1), member 6                                                 |                    |
| ABCA9              | ATP-binding cassette, sub-family A (ABC1), member 9                                                 |                    |
| ABCB6              | ATP-binding cassette, sub-family B (MDR/TAP), member 6                                              |                    |
| ABCC11             | ATP-binding cassette, sub-family C (CFTR/MRP), member 11                                            |                    |
| ABCC12             | ATP-binding cassette, sub-family C (CFTR/MRP), member 12                                            |                    |
| ABCC8              | ATP-binding cassette, sub-family C (CFTR/MRP), member 8                                             |                    |
| ABCC9              | ATP-binding cassette, sub-family C (CFTR/MRP), member 9                                             |                    |
| ABHD4              | Abhydrolase domain containing 4                                                                     |                    |
| ABI2               | Abl-interactor 2                                                                                    |                    |
| <b>ABL1</b>        | <b>C-abl oncogene 1, non-receptor tyrosine kinase</b>                                               | √                  |
| <b>ABL2</b>        | <b>V-abl Abelson murine leukemia viral oncogene homolog 2</b>                                       | √                  |
| AC002472.13        | Leucine-rich repeat-containing protein LOC400891                                                    |                    |
| AC004790.1         |                                                                                                     |                    |
| AC005035.1         |                                                                                                     |                    |
| AC008060.7         | HCG2000720Hypothetical gene supported by AK054822Uncharacterized protein                            |                    |
| AC010536.2         | Uncharacterized proteincdna FLJ45526 fis, clone BRTHA2027227                                        |                    |
| AC016586.1         |                                                                                                     |                    |
| AC018755.11        | HCG2008157Uncharacterized proteincdna FLJ30403 fis, clone BRACE2008480                              |                    |
| AC020659.1         | HCG1998685                                                                                          |                    |
| AC021218.2         | Uncharacterized protein                                                                             |                    |
| AC069257.9         | Organic solute transporter subunit alpha                                                            |                    |
| AC092117.1         | Uncharacterized proteincdna FLJ43818 fis, clone TESTI4001923                                        |                    |
| AC092171.1         | Uncharacterized proteincdna FLJ43318 fis, clone NT2RI2018311                                        |                    |
| AC103810.1         | Uncharacterized proteincdna FLJ60005, moderately similar to Homo sapiens pleckstrin homology domain |                    |
| AC104472.1         | CDNA FLJ26134 fis, clone TMS03713Uncharacterized protein                                            |                    |
| AC108134.1         |                                                                                                     |                    |
| AC110781.3         | Uncharacterized protein                                                                             |                    |
| AC115618.1         | Uncharacterized proteincdna FLJ26048 fis, clone PRS02384                                            |                    |
| AC132186.2         | CDNA FLJ27243 fis, clone SYN08134Uncharacterized protein                                            |                    |

|          |                                                            |  |
|----------|------------------------------------------------------------|--|
| ACAA1    | Acetyl-CoA acyltransferase 1                               |  |
| ACACB    | Acetyl-CoA carboxylase beta                                |  |
| ACAD10   | Acyl-CoA dehydrogenase family, member 10                   |  |
| ACAD9    | Acyl-CoA dehydrogenase family, member 9                    |  |
| ACADVL   | Acyl-CoA dehydrogenase, very long chain                    |  |
| ACCN4    | Amiloride-sensitive cation channel 4, pituitary            |  |
| ACE      | Angiotensin I converting enzyme (peptidyl-dipeptidase A) 1 |  |
| ACER3    | Alkaline ceramidase 3                                      |  |
| ACLY     | ATP citrate lyase                                          |  |
| ACN9     | ACN9 homolog ( <i>S. Cerevisiae</i> )                      |  |
| ACOT11   | Acyl-CoA thioesterase 11                                   |  |
| ACOX1    | Acyl-CoA oxidase 1, palmitoyl                              |  |
| ACRBP    | Acrosin binding protein                                    |  |
| ACSBG1   | Acyl-CoA synthetase bubblegum family member 1              |  |
| ACSF2    | Acyl-CoA synthetase family member 2                        |  |
| ACSL1    | Acyl-CoA synthetase long-chain family member 1             |  |
| ACSS1    | Acyl-CoA synthetase short-chain family member 1            |  |
| ACSS2    | Acyl-CoA synthetase short-chain family member 2            |  |
| ACTR5    | ARP5 actin-related protein 5 homolog (yeast)               |  |
| ACTR6    | ARP6 actin-related protein 6 homolog (yeast)               |  |
| ACVR1    | Activin A receptor, type I                                 |  |
| ACVR1B   | Activin A receptor, type IB                                |  |
| ACYP2    | Acylphosphatase 2, muscle type                             |  |
| ADAM15   | ADAM metallopeptidase domain 15                            |  |
| ADAM20   | ADAM metallopeptidase domain 20                            |  |
| ADAM29   | ADAM metallopeptidase domain 29                            |  |
| ADAM33   | ADAM metallopeptidase domain 33                            |  |
| ADAMTS1  | ADAM metallopeptidase with thrombospondin type 1 motif, 1  |  |
| ADAMTS15 | ADAM metallopeptidase with thrombospondin type 1 motif, 15 |  |
| ADAMTS16 | ADAM metallopeptidase with thrombospondin type 1 motif, 16 |  |
| ADAMTS18 | ADAM metallopeptidase with thrombospondin type 1 motif, 18 |  |
| ADAMTS8  | ADAM metallopeptidase with thrombospondin type 1 motif, 8  |  |
| ADAMTS9  | ADAM metallopeptidase with thrombospondin type 1 motif, 9  |  |
| ADAMTSL1 | ADAMTS-like 1                                              |  |
| ADAMTSL2 | ADAMTS-like 2                                              |  |
| ADAMTSL3 | ADAMTS-like 3                                              |  |

|         |                                                                                                       |   |
|---------|-------------------------------------------------------------------------------------------------------|---|
| ADAR    | Adenosine deaminase, RNA-specific                                                                     |   |
| ADCK1   | aarf domain containing kinase 1                                                                       |   |
| ADCK3   | aarf domain containing kinase 3                                                                       |   |
| ADCK5   | aarf domain containing kinase 5                                                                       |   |
| ADCY3   | Adenylate cyclase 3                                                                                   |   |
| ADCY6   | Adenylate cyclase 6                                                                                   |   |
| ADNP    | Activity-dependent neuroprotector homeobox                                                            |   |
| ADNP2   | ADNP homeobox 2                                                                                       |   |
| ADORA1  | Adenosine A1 receptor                                                                                 |   |
| ADPRH   | ADP-ribosylarginine hydrolase                                                                         |   |
| ADPRHL2 | ADP-ribosylhydrolase like 2                                                                           |   |
| ADRA2B  | Adrenergic, alpha-2B-, receptor                                                                       |   |
| ADSL    | Adenylosuccinate lyase                                                                                |   |
| AES     | Amino-terminal enhancer of split                                                                      |   |
| AFF2    | AF4/FMR2 family, member 2                                                                             |   |
| AFF4    | AF4/FMR2 family, member 4                                                                             |   |
| AGAP2   | Arfgap with gtpase domain, ankyrin repeat and PH domain 2                                             |   |
| AGBL1   | ATP/GTP binding protein-like 1                                                                        |   |
| AGBL4   | ATP/GTP binding protein-like 4                                                                        |   |
| AGPAT4  | 1-Acylglycerol-3-phosphate <i>O</i> -acyltransferase 4 (lysophosphatidic acid acyltransferase, delta) |   |
| AGPAT6  | 1-Acylglycerol-3-phosphate <i>O</i> -acyltransferase 6 (lysophosphatidic acid acyltransferase, zeta)  |   |
| AGPS    | Alkylglycerone phosphate synthase                                                                     |   |
| AGRN    | Agrin                                                                                                 |   |
| AHNAK2  | AHNAK nucleoprotein 2                                                                                 |   |
| AIF1L   | Allograft inflammatory factor 1-like                                                                  |   |
| AIFM2   | Apoptosis-inducing factor, mitochondrion-associated, 2                                                |   |
| AIP     | Aryl hydrocarbon receptor interacting protein                                                         |   |
| AIPL1   | Aryl hydrocarbon receptor interacting protein-like 1                                                  |   |
| AIRE    | Autoimmune regulator                                                                                  |   |
| AK1     | Adenylate kinase 1                                                                                    |   |
| AK7     | Adenylate kinase 7                                                                                    |   |
| AKAP13  | A kinase (PRKA) anchor protein 13                                                                     |   |
| AKAP2   | A kinase (PRKA) anchor protein 2                                                                      |   |
| AKAP3   | A kinase (PRKA) anchor protein 3                                                                      |   |
| AKAP6   | A kinase (PRKA) anchor protein 6                                                                      |   |
| AKAP9   | A kinase (PRKA) anchor protein (yotiao) 9                                                             | √ |

|            |                                                                                                                     |   |
|------------|---------------------------------------------------------------------------------------------------------------------|---|
| AKD1       | Adenylate kinase domain containing 1                                                                                |   |
| AKT1       | V-akt murine thymoma viral oncogene homolog 1                                                                       | √ |
| AKT2       | V-akt murine thymoma viral oncogene homolog 2                                                                       | √ |
| AL356356.1 | Uncharacterized protein                                                                                             |   |
| ALAD       | Aminolevulinate dehydratase                                                                                         |   |
| ALAS2      | Aminolevulinate, delta-, synthase 2                                                                                 |   |
| ALDH1A1    | Aldehyde dehydrogenase 1 family, member A1                                                                          |   |
| ALDH2      | Aldehyde dehydrogenase 2 family (mitochondrial)                                                                     | √ |
| ALDH5A1    | Aldehyde dehydrogenase 5 family, member A1                                                                          |   |
| ALDOC      | Aldolase C, fructose-bisphosphate                                                                                   |   |
| ALG11      | Asparagine-linked glycosylation 11, alpha-1,2-mannosyltransferase homolog (yeast)                                   |   |
| ALG5       | Asparagine-linked glycosylation 5, dolichyl-phosphate $\beta$ -glucosyltransferase homolog ( <i>S. Cerevisiae</i> ) |   |
| ALOX5      | Arachidonate 5-lipoxygenase                                                                                         |   |
| ALS2CL     | ALS2 C-terminal like                                                                                                |   |
| ALS2CR8    | Amyotrophic lateral sclerosis 2 (juvenile) chromosome region, candidate 8                                           |   |
| ALX4       | ALX homeobox 4                                                                                                      |   |
| AMBP       | Alpha-1-microglobulin/bikunin precursor                                                                             |   |
| AMBRA1     | Autophagy/beclin-1 regulator 1                                                                                      |   |
| AMIGO3     | Adhesion molecule with Ig-like domain 3                                                                             |   |
| AMPD2      | Adenosine monophosphate deaminase 2                                                                                 |   |
| AMPH       | Amphiphysin                                                                                                         |   |
| ANAPC5     | Anaphase promoting complex subunit 5                                                                                |   |
| ANGEL1     | Angel homolog 1 ( <i>Drosophila</i> )                                                                               |   |
| ANGPTL2    | Angiopoietin-like 2                                                                                                 |   |
| ANGPTL3    | Angiopoietin-like 3                                                                                                 |   |
| ANGPTL7    | Angiopoietin-like 7                                                                                                 |   |
| ANK2       | Ankyrin 2, neuronal                                                                                                 |   |
| ANKH       | Ankylosis, progressive homolog (mouse)                                                                              |   |
| ANKIB1     | Ankyrin repeat and IBR domain containing 1                                                                          |   |
| ANKLE2     | Ankyrin repeat and LEM domain containing 2                                                                          |   |
| ANKMY2     | Ankyrin repeat and MYND domain containing 2                                                                         |   |
| ANKRD16    | Ankyrin repeat domain 16                                                                                            |   |
| ANKRD24    | Ankyrin repeat domain 24                                                                                            |   |
| ANKRD52    | Ankyrin repeat domain 52                                                                                            |   |
| ANKRD57    | Ankyrin repeat domain 57                                                                                            |   |
| ANKS1A     | Ankyrin repeat and sterile alpha motif domain containing 1A                                                         |   |

|           |                                                                                         |  |
|-----------|-----------------------------------------------------------------------------------------|--|
| ANKS6     | Ankyrin repeat and sterile alpha motif domain containing 6                              |  |
| ANP32B    | Acidic (leucine-rich) nuclear phosphoprotein 32 family, member B                        |  |
| ANPEP     | Alanyl (membrane) aminopeptidase                                                        |  |
| ANXA8     | Annexin A8                                                                              |  |
| ANXA8L1   | Annexin A8-like 1                                                                       |  |
| AP2A2     | Adaptor-related protein complex 2, alpha 2 subunit                                      |  |
| AP3B1     | Adaptor-related protein complex 3, beta 1 subunit                                       |  |
| APC2      | Adenomatosis polyposis coli 2                                                           |  |
| APCDD1L   | Adenomatosis polyposis coli down-regulated 1-like                                       |  |
| APEH      | <i>N</i> -acylaminoacyl-peptide hydrolase                                               |  |
| APLN      | Apelin                                                                                  |  |
| APOL1     | Apolipoprotein L, 1                                                                     |  |
| APOL2     | Apolipoprotein L, 2                                                                     |  |
| APOL3     | Apolipoprotein L, 3                                                                     |  |
| APOL5     | Apolipoprotein L, 5                                                                     |  |
| APOPT1    | Apoptogenic 1                                                                           |  |
| APP       | Amyloid beta (A4) precursor protein                                                     |  |
| APPL2     | Adaptor protein, phosphotyrosine interaction, PH domain and leucine zipper containing 2 |  |
| AQP10     | Aquaporin 10                                                                            |  |
| AQP4      | Aquaporin 4                                                                             |  |
| ARAF      | V-raf murine sarcoma 3611 viral oncogene homolog                                        |  |
| ARAP2     | Arfgap with rhogap domain, ankyrin repeat and PH domain 2                               |  |
| ARAP3     | Arfgap with rhogap domain, ankyrin repeat and PH domain 3                               |  |
| ARG2      | Arginase, type II                                                                       |  |
| ARHGAP20  | Rho gtpase activating protein 20                                                        |  |
| ARHGAP26  | Rho gtpase activating protein 26                                                        |  |
| ARHGAP31  | Rho gtpase activating protein 31                                                        |  |
| ARHGAP4   | Rho gtpase activating protein 4                                                         |  |
| ARHGAP44  | Rho gtpase activating protein 44                                                        |  |
| ARHGAP9   | Rho gtpase activating protein 9                                                         |  |
| ARHGEF10L | Rho guanine nucleotide exchange factor (GEF) 10-like                                    |  |
| ARHGEF16  | Rho guanine nucleotide exchange factor (GEF) 16                                         |  |
| ARHGEF18  | Rho/Rac guanine nucleotide exchange factor (GEF) 18                                     |  |
| ARHGEF2   | Rho/Rac guanine nucleotide exchange factor (GEF) 2                                      |  |
| ARHGEF25  | Rho guanine nucleotide exchange factor (GEF) 25                                         |  |
| ARHGEF26  | Rho guanine nucleotide exchange factor (GEF) 26                                         |  |

|          |                                                                           |   |
|----------|---------------------------------------------------------------------------|---|
| ARHGEF40 | Rho guanine nucleotide exchange factor (GEF) 40                           |   |
| ARHGEF6  | Rac/Cdc42 guanine nucleotide exchange factor (GEF) 6                      |   |
| ARID1A   | AT rich interactive domain 1A (SWI-like)                                  | √ |
| ARID2    | AT rich interactive domain 2 (ARID, RFX-like)                             | √ |
| ARID5B   | AT rich interactive domain 5B (MRF1-like)                                 |   |
| ARL10    | ADP-ribosylation factor-like 10                                           |   |
| ARL2BP   | ADP-ribosylation factor-like 2 binding protein                            |   |
| ARMC10   | Armadillo repeat containing 10                                            |   |
| ARMCX4   | Armadillo repeat containing, X-linked 4                                   |   |
| ARNT2    | Aryl-hydrocarbon receptor nuclear translocator 2                          |   |
| ARPC5L   | Actin related protein 2/3 complex, subunit 5-like                         |   |
| ARPP21   | cAMP-regulated phosphoprotein, 21kda                                      |   |
| ARSI     | Arylsulfatase family, member I                                            |   |
| ART1     | ADP-ribosyltransferase 1                                                  |   |
| ASB17    | Ankyrin repeat and SOCS box containing 17                                 |   |
| ASB4     | Ankyrin repeat and SOCS box containing 4                                  |   |
| ASCC3    | Activating signal cointegrator 1 complex subunit 3                        |   |
| ASH1L    | Ash1 (absent, small, or homeotic)-like (Drosophila)                       |   |
| ASMTL    | Acetylserotonin O-methyltransferase-like                                  |   |
| ASPM     | Asp (abnormal spindle) homolog, microcephaly associated (Drosophila)      |   |
| ASTN1    | Astrotactin 1                                                             |   |
| ASXL1    | Additional sex combs like 1 (Drosophila)                                  | √ |
| ATAD2B   | ATPase family, AAA domain containing 2B                                   |   |
| ATAD5    | ATPase family, AAA domain containing 5                                    |   |
| ATCAY    | Ataxia, cerebellar, Cayman type                                           |   |
| ATF6B    | Activating transcription factor 6 beta                                    |   |
| ATG12    | ATG12 autophagy related 12 homolog ( <i>S. Cerevisiae</i> )               |   |
| ATG14    | ATG14 autophagy related 14 homolog ( <i>S. Cerevisiae</i> )               |   |
| ATG16L1  | ATG16 autophagy related 16-like 1 ( <i>S. Cerevisiae</i> )                |   |
| ATG2B    | ATG2 autophagy related 2 homolog B ( <i>S. Cerevisiae</i> )               |   |
| ATG4D    | ATG4 autophagy related 4 homolog D ( <i>S. Cerevisiae</i> )               |   |
| ATHL1    | ATH1, acid trehalase-like 1 (yeast)                                       |   |
| ATP10A   | ATPase, class V, type 10A                                                 |   |
| ATP10B   | ATPase, class V, type 10B                                                 |   |
| ATP1A1   | ATPase, Na <sup>+</sup> /K <sup>+</sup> transporting, alpha 1 polypeptide | √ |
| ATP1A2   | ATPase, Na <sup>+</sup> /K <sup>+</sup> transporting, alpha 2 polypeptide |   |

|          |                                                                             |   |
|----------|-----------------------------------------------------------------------------|---|
| ATP1A3   | ATPase, Na <sup>+</sup> /K <sup>+</sup> transporting, alpha 3 polypeptide   |   |
| ATP4B    | ATPase, H <sup>+</sup> /K <sup>+</sup> exchanging, beta polypeptide         |   |
| ATP6AP1L | ATPase, H <sup>+</sup> transporting, lysosomal accessory protein 1-like     |   |
| ATP6V0A1 | ATPase, H <sup>+</sup> transporting, lysosomal V0 subunit a1                |   |
| ATP6V0A2 | ATPase, H <sup>+</sup> transporting, lysosomal V0 subunit a2                |   |
| ATP6V1E1 | ATPase, H <sup>+</sup> transporting, lysosomal 31kda, V1 subunit E1         |   |
| ATP7B    | ATPase, Cu <sup>++</sup> transporting, beta polypeptide                     |   |
| ATP8A2   | ATPase, aminophospholipid transporter, class I, type 8A, member 2           |   |
| ATP8B1   | ATPase, aminophospholipid transporter, class I, type 8B, member 1           |   |
| ATP8B4   | ATPase, class I, type 8B, member 4                                          |   |
| ATP9B    | ATPase, class II, type 9B                                                   |   |
| ATRIP    | ATR interacting protein                                                     |   |
| ATXN3    | Ataxin 3                                                                    |   |
| AUTS2    | Autism susceptibility candidate 2                                           |   |
| AXIN1    | Axin 1                                                                      | √ |
| B3GNT1   | UDP-glcnac:betagal beta-1,3- <i>N</i> -acetylglucosaminyltransferase 1      |   |
| B3GNT7   | UDP-glcnac:betagal beta-1,3- <i>N</i> -acetylglucosaminyltransferase 7      |   |
| B3GNT8   | UDP-glcnac:betagal beta-1,3- <i>N</i> -acetylglucosaminyltransferase 8      |   |
| B4GALNT1 | Beta-1,4- <i>N</i> -acetyl-galactosaminyl transferase 1                     |   |
| B4GALNT2 | Beta-1,4- <i>N</i> -acetyl-galactosaminyl transferase 2                     |   |
| B4GALNT4 | Beta-1,4- <i>N</i> -acetyl-galactosaminyl transferase 4                     |   |
| B4GALT3  | UDP-Gal:betaglcnac beta 1,4- galactosyltransferase, polypeptide 3           |   |
| B4GALT6  | UDP-Gal:betaglcnac beta 1,4- galactosyltransferase, polypeptide 6           |   |
| B9D2     | B9 protein domain 2                                                         |   |
| BACH2    | BTB and CNC homology 1, basic leucine zipper transcription factor 2         |   |
| BAG6     | BCL2-associated athanogene 6                                                |   |
| BAIAP2L1 | Brain-specific angiogenesis inhibitor 1-associated protein 2-like protein 1 |   |
| BAIAP2L2 | BAI1-associated protein 2-like 2                                            |   |
| BAK1     | BCL2-antagonist/killer 1                                                    |   |
| BAZ2A    | Bromodomain adjacent to zinc finger domain, 2A                              |   |
| BBS2     | Bardet-Biedl syndrome 2                                                     |   |
| BCAN     | Brevican                                                                    |   |
| BCAS3    | Breast carcinoma amplified sequence 3                                       |   |
| BCAT1    | Branched chain amino-acid transaminase 1, cytosolic                         |   |
| BCKDHA   | Branched chain keto acid dehydrogenase E1, alpha polypeptide                |   |
| BCL6     | B-cell CLL/lymphoma 6                                                       | √ |



|              |                                                                                                                 |   |
|--------------|-----------------------------------------------------------------------------------------------------------------|---|
| <b>BCL7A</b> | B-cell CLL/lymphoma 7A                                                                                          | √ |
| BCL9L        | B-cell CLL/lymphoma 9-like                                                                                      |   |
| BCO2         | Beta-carotene oxygenase 2                                                                                       |   |
| <b>BCR</b>   | Breakpoint cluster region                                                                                       | √ |
| BCS1L        | BCS1-like ( <i>S. Cerevisiae</i> )                                                                              |   |
| BDH1         | 3-hydroxybutyrate dehydrogenase, type 1                                                                         |   |
| BDKRB2       | Bradykinin receptor B2                                                                                          |   |
| BDP1         | B double prime 1, subunit of RNA polymerase III transcription initiation factor IIIB                            |   |
| BEAN1        | Brain expressed, associated with NEDD4, 1                                                                       |   |
| BEST1        | Bestrophin 1                                                                                                    |   |
| BEST3        | Bestrophin 3                                                                                                    |   |
| BFSP2        | Beaded filament structural protein 2, phakinin                                                                  |   |
| BHLHE22      | Basic helix-loop-helix family, member e22                                                                       |   |
| BIRC6        | Baculoviral IAP repeat containing 6                                                                             |   |
| BLK          | B lymphoid tyrosine kinase                                                                                      |   |
| BLNK         | B-cell linker                                                                                                   |   |
| BLZF1        | Basic leucine zipper nuclear factor 1                                                                           |   |
| BMPR1B       | Bone morphogenetic protein receptor, type IB                                                                    |   |
| BOD1L        | Biorientation of chromosomes in cell division 1-like                                                            |   |
| BOLA3        | Bola homolog 3 ( <i>E. Coli</i> )                                                                               |   |
| BPNT1        | 3'(2'), 5'-bisphosphate nucleotidase 1                                                                          |   |
| BRAT1        | BRCA1-associated ATM activator 1                                                                                |   |
| BRD1         | Bromodomain containing 1                                                                                        |   |
| <b>BRD3</b>  | Bromodomain containing 3                                                                                        | √ |
| BRF2         | BRF2, subunit of RNA polymerase III transcription initiation factor, BRF1-like                                  |   |
| BRI3BP       | BRI3 binding protein                                                                                            |   |
| BRSK1        | BR serine/threonine kinase 1                                                                                    |   |
| BRWD1        | Bromodomain and WD repeat domain containing 1                                                                   |   |
| BSN          | Bassoon (presynaptic cytomatrix protein)                                                                        |   |
| BSND         | Bartter syndrome, infantile, with sensorineural deafness (Barttin)                                              |   |
| BTA1F1       | BTA1F1 RNA polymerase II, B-TFIID transcription factor-associated, 170kda (Mot1 homolog, <i>S. Cerevisiae</i> ) |   |
| BTK          | Bruton agammaglobulinemia tyrosine kinase                                                                       |   |
| BTN2A2       | Butyrophilin, subfamily 2, member A2                                                                            |   |
| BVES         | Blood vessel epicardial substance                                                                               |   |
| BZRAP1       | Benzodiazapine receptor (peripheral) associated protein 1                                                       |   |
| BZW2         | Basic leucine zipper and W2 domains 2                                                                           |   |

|           |                                      |  |
|-----------|--------------------------------------|--|
| C10orf112 | Chromosome 10 open reading frame 112 |  |
| C10orf32  | Chromosome 10 open reading frame 32  |  |
| C10orf55  | Chromosome 10 open reading frame 55  |  |
| C10orf76  | Chromosome 10 open reading frame 76  |  |
| C11orf2   | Chromosome 11 open reading frame 2   |  |
| C11orf41  | Chromosome 11 open reading frame 41  |  |
| C11orf48  | Chromosome 11 open reading frame 48  |  |
| C11orf65  | Chromosome 11 open reading frame 65  |  |
| C11orf70  | Chromosome 11 open reading frame 70  |  |
| C11orf9   | Chromosome 11 open reading frame 9   |  |
| C12orf35  | Chromosome 12 open reading frame 35  |  |
| C12orf51  | Chromosome 12 open reading frame 51  |  |
| C12orf66  | Chromosome 12 open reading frame 66  |  |
| C12orf76  | Chromosome 12 open reading frame 76  |  |
| C14orf132 | Chromosome 14 open reading frame 132 |  |
| C14orf144 | Chromosome 14 open reading frame 144 |  |
| C14orf180 | Chromosome 14 open reading frame 180 |  |
| C14orf21  | Chromosome 14 open reading frame 21  |  |
| C14orf43  | Chromosome 14 open reading frame 43  |  |
| C15orf27  | Chromosome 15 open reading frame 27  |  |
| C15orf42  | Chromosome 15 open reading frame 42  |  |
| C15orf55  | Chromosome 15 open reading frame 55  |  |
| C15orf57  | Chromosome 15 open reading frame 57  |  |
| C15orf58  | Chromosome 15 open reading frame 58  |  |
| C16orf45  | Chromosome 16 open reading frame 45  |  |
| C16orf58  | Chromosome 16 open reading frame 58  |  |
| C16orf62  | Chromosome 16 open reading frame 62  |  |
| C17orf39  | Chromosome 17 open reading frame 39  |  |
| C17orf59  | Chromosome 17 open reading frame 59  |  |
| C17orf63  | Chromosome 17 open reading frame 63  |  |
| C17orf70  | Chromosome 17 open reading frame 70  |  |
| C17orf75  | Chromosome 17 open reading frame 75  |  |
| C18orf34  | Chromosome 18 open reading frame 34  |  |
| C18orf63  | Chromosome 18 open reading frame 63  |  |
| C19orf12  | Chromosome 19 open reading frame 12  |  |
| C19orf2   | Chromosome 19 open reading frame 2   |  |

|          |                                                        |  |
|----------|--------------------------------------------------------|--|
| C19orf39 | Chromosome 19 open reading frame 39                    |  |
| C19orf54 | Chromosome 19 open reading frame 54                    |  |
| C19orf59 | Chromosome 19 open reading frame 59                    |  |
| C19orf6  | Chromosome 19 open reading frame 6                     |  |
| C19orf66 | Chromosome 19 open reading frame 66                    |  |
| C1orf134 | Chromosome 1 open reading frame 134                    |  |
| C1orf145 | Chromosome 1 open reading frame 145                    |  |
| C1orf147 | Chromosome 1 open reading frame 147                    |  |
| C1orf150 | Chromosome 1 open reading frame 150                    |  |
| C1orf167 | Chromosome 1 open reading frame 167                    |  |
| C1orf168 | Chromosome 1 open reading frame 168                    |  |
| C1orf170 | Chromosome 1 open reading frame 170                    |  |
| C1orf173 | Chromosome 1 open reading frame 173                    |  |
| C1orf187 | Chromosome 1 open reading frame 187                    |  |
| C1orf191 | Chromosome 1 open reading frame 191                    |  |
| C1orf21  | Chromosome 1 open reading frame 21                     |  |
| C1orf50  | Chromosome 1 open reading frame 50                     |  |
| C1orf55  | Chromosome 1 open reading frame 55                     |  |
| C1orf85  | Chromosome 1 open reading frame 85                     |  |
| C1orf87  | Chromosome 1 open reading frame 87                     |  |
| C1orf9   | Chromosome 1 open reading frame 9                      |  |
| C1orf93  | Chromosome 1 open reading frame 93                     |  |
| C1orf94  | Chromosome 1 open reading frame 94                     |  |
| C1QBP    | Complement component 1, q subcomponent binding protein |  |
| C1S      | Complement component 1, s subcomponent                 |  |
| C2       | Complement component 2                                 |  |
| C20orf26 | Chromosome 20 open reading frame 26                    |  |
| C20orf7  | Chromosome 20 open reading frame 7                     |  |
| C22orf13 | Chromosome 22 open reading frame 13                    |  |
| C22orf26 | Chromosome 22 open reading frame 26                    |  |
| C22orf28 | Chromosome 22 open reading frame 28                    |  |
| C22orf46 | Chromosome 22 open reading frame 46                    |  |
| C2CD2    | C2 calcium-dependent domain containing 2               |  |
| C2CD3    | C2 calcium-dependent domain containing 3               |  |
| C2orf16  | Chromosome 2 open reading frame 16                     |  |
| C2orf50  | Chromosome 2 open reading frame 50                     |  |

|          |                                     |  |
|----------|-------------------------------------|--|
| C3       | Complement component 3              |  |
| C3AR1    | Complement component 3a receptor 1  |  |
| C3orf25  | Chromosome 3 open reading frame 25  |  |
| C3orf52  | Chromosome 3 open reading frame 52  |  |
| C3orf62  | Chromosome 3 open reading frame 62  |  |
| C3orf64  | Chromosome 3 open reading frame 64  |  |
| C3orf71  | Chromosome 3 open reading frame 71  |  |
| C5orf41  | Chromosome 5 open reading frame 41  |  |
| C5orf54  | Chromosome 5 open reading frame 54  |  |
| C5orf62  | Chromosome 5 open reading frame 62  |  |
| C6orf1   | Chromosome 6 open reading frame 1   |  |
| C6orf10  | Chromosome 6 open reading frame 10  |  |
| C6orf106 | Chromosome 6 open reading frame 106 |  |
| C6orf130 | Chromosome 6 open reading frame 130 |  |
| C6orf132 | Chromosome 6 open reading frame 132 |  |
| C6orf136 | Chromosome 6 open reading frame 136 |  |
| C6orf154 | Chromosome 6 open reading frame 154 |  |
| C6orf174 | Chromosome 6 open reading frame 174 |  |
| C6orf222 | Chromosome 6 open reading frame 222 |  |
| C6orf35  | Chromosome 6 open reading frame 35  |  |
| C6orf48  | Chromosome 6 open reading frame 48  |  |
| C6orf62  | Chromosome 6 open reading frame 62  |  |
| C7orf26  | Chromosome 7 open reading frame 26  |  |
| C7orf28B | Chromosome 7 open reading frame 28B |  |
| C7orf44  | Chromosome 7 open reading frame 44  |  |
| C7orf58  | Chromosome 7 open reading frame 58  |  |
| C9orf100 | Chromosome 9 open reading frame 100 |  |
| C9orf11  | Chromosome 9 open reading frame 11  |  |
| C9orf131 | Chromosome 9 open reading frame 131 |  |
| C9orf139 | Chromosome 9 open reading frame 139 |  |
| C9orf163 | Chromosome 9 open reading frame 163 |  |
| C9orf174 | Chromosome 9 open reading frame 174 |  |
| C9orf25  | Chromosome 9 open reading frame 25  |  |
| C9orf3   | Chromosome 9 open reading frame 3   |  |
| C9orf35  | Chromosome 9 open reading frame 35  |  |
| C9orf82  | Chromosome 9 open reading frame 82  |  |

|          |                                                                                  |  |
|----------|----------------------------------------------------------------------------------|--|
| C9orf93  | Chromosome 9 open reading frame 93                                               |  |
| C9orf96  | Chromosome 9 open reading frame 96                                               |  |
| CA10     | Carbonic anhydrase X                                                             |  |
| CABLES1  | Cdk5 and Abl enzyme substrate 1                                                  |  |
| CACNA1B  | Calcium channel, voltage-dependent, N type, alpha 1B subunit                     |  |
| CACNA1C  | Calcium channel, voltage-dependent, L type, alpha 1C subunit                     |  |
| CACNA1F  | Calcium channel, voltage-dependent, L type, alpha 1F subunit                     |  |
| CACNA2D1 | Calcium channel, voltage-dependent, alpha 2/delta subunit 1                      |  |
| CACNB2   | Calcium channel, voltage-dependent, beta 2 subunit                               |  |
| CACNB3   | Calcium channel, voltage-dependent, beta 3 subunit                               |  |
| CAD      | Carbamoyl-phosphate synthetase 2, aspartate transcarbamylase, and dihydroorotase |  |
| CADPS    | Ca <sup>++</sup> -dependent secretion activator                                  |  |
| CALM1    | Calmodulin 1 (phosphorylase kinase, delta)                                       |  |
| CALML6   | Calmodulin-like 6                                                                |  |
| CAMK1D   | Calcium/calmodulin-dependent protein kinase ID                                   |  |
| CAMK2B   | Calcium/calmodulin-dependent protein kinase II beta                              |  |
| CAMK4    | Calcium/calmodulin-dependent protein kinase IV                                   |  |
| CAMSAP1  | Calmodulin regulated spectrin-associated protein 1                               |  |
| CAMTA2   | Calmodulin binding transcription activator 2                                     |  |
| CAP1     | CAP, adenylate cyclase-associated protein 1 (yeast)                              |  |
| CAPG     | Capping protein (actin filament), gelsolin-like                                  |  |
| CAPN11   | Calpain 11                                                                       |  |
| CAPN12   | Calpain 12                                                                       |  |
| CAPN13   | Calpain 13                                                                       |  |
| CARD10   | Caspase recruitment domain family, member 10                                     |  |
| CARM1    | Coactivator-associated arginine methyltransferase 1                              |  |
| CASD1    | CAS1 domain containing 1                                                         |  |
| CASKIN2  | CASK interacting protein 2                                                       |  |
| CASS4    | Cas scaffolding protein family member 4                                          |  |
| CAST     | Calpastatin                                                                      |  |
| CASZ1    | Castor zinc finger 1                                                             |  |
| CATSPER2 | Cation channel, sperm associated 2                                               |  |
| CATSPERG | Cation channel, sperm-associated, gamma                                          |  |
| CBFA2T2  | Core-binding factor, runt domain, alpha subunit 2; translocated to, 2            |  |
| CBLN2    | Cerebellin 2 precursor                                                           |  |
| CBS      | Cystathionine-beta-synthase                                                      |  |

|           |                                                                                              |   |
|-----------|----------------------------------------------------------------------------------------------|---|
| CBWD3     | COBW domain containing 3                                                                     |   |
| CBWD5     | COBW domain containing 5                                                                     |   |
| CBWD6     | COBW domain containing 6                                                                     |   |
| CBX5      | Chromobox homolog 5                                                                          |   |
| CBX7      | Chromobox homolog 7                                                                          |   |
| CCDC117   | Coiled-coil domain containing 117                                                            |   |
| CCDC129   | Coiled-coil domain containing 129                                                            |   |
| CCDC134   | Coiled-coil domain containing 134                                                            |   |
| CCDC137   | Coiled-coil domain containing 137                                                            |   |
| CCDC142   | Coiled-coil domain containing 142                                                            |   |
| CCDC144A  | Coiled-coil domain containing 144A                                                           |   |
| CCDC144NL | Coiled-coil domain containing 144 family, N-terminal like                                    |   |
| CCDC152   | Coiled-coil domain containing 152                                                            |   |
| CCDC155   | Coiled-coil domain containing 155                                                            |   |
| CCDC157   | Coiled-coil domain containing 157                                                            |   |
| CCDC158   | Coiled-coil domain containing 158                                                            |   |
| CCDC165   | Coiled-coil domain containing 165                                                            |   |
| CCDC168   | Coiled-coil domain containing 168                                                            |   |
| CCDC22    | Coiled-coil domain containing 22                                                             |   |
| CCDC37    | Coiled-coil domain containing 37                                                             |   |
| CCDC40    | Coiled-coil domain containing 40                                                             |   |
| CCDC64    | Coiled-coil domain containing 64                                                             |   |
| CCDC67    | Coiled-coil domain containing 67                                                             |   |
| CCDC69    | Coiled-coil domain containing 69                                                             |   |
| CCDC71    | Coiled-coil domain containing 71                                                             |   |
| CCDC88C   | Coiled-coil domain containing 88C                                                            |   |
| CCNB1IP1  | Cyclin B1 interacting protein 1, E3 ubiquitin protein ligase                                 | √ |
| CCND2     | Cyclin D2                                                                                    | √ |
| CCNL2     | Cyclin L2                                                                                    |   |
| CCT4      | Chaperonin containing TCP1, subunit 4 (delta)                                                |   |
| CCZ1      | CCZ1 vacuolar protein trafficking and biogenesis associated homolog ( <i>S. Cerevisiae</i> ) |   |
| CD101     | CD101 molecule                                                                               |   |
| CD22      | CD22 molecule                                                                                |   |
| CD247     | CD247 molecule                                                                               |   |
| CD40      | CD40 molecule, TNF receptor superfamily member 5                                             |   |
| CD5       | CD5 molecule                                                                                 |   |

|          |                                                                                       |   |
|----------|---------------------------------------------------------------------------------------|---|
| CD55     | CD55 molecule, decay accelerating factor for complement (Cromer blood group)          |   |
| CD8B     | CD8b molecule                                                                         |   |
| CDC40    | Cell division cycle 40 homolog ( <i>S. Cerevisiae</i> )                               |   |
| CDC42BPA | CDC42 binding protein kinase alpha (DMPK-like)                                        |   |
| CDC42BPG | CDC42 binding protein kinase gamma (DMPK-like)                                        |   |
| CDC5L    | CDC5 cell division cycle 5-like ( <i>S. Pombe</i> )                                   |   |
| CDCP2    | CUB domain containing protein 2                                                       |   |
| CDH12    | Cadherin 12, type 2 (N-cadherin 2)                                                    |   |
| CDH16    | Cadherin 16, KSP-cadherin                                                             |   |
| CDH18    | Cadherin 18, type 2                                                                   |   |
| CDH23    | Cadherin-related 23                                                                   |   |
| CDH24    | Cadherin 24, type 2                                                                   |   |
| CDHR3    | Cadherin-related family member 3                                                      |   |
| CDK13    | Cyclin-dependent kinase 13                                                            |   |
| CDK5RAP2 | CDK5 regulatory subunit associated protein 2                                          |   |
| CDK6     | Cyclin-dependent kinase 6                                                             | √ |
| CDON     | Cdon homolog (mouse)                                                                  |   |
| CDT1     | Chromatin licensing and DNA replication factor 1                                      |   |
| CEACAM21 | Carcinoembryonic antigen-related cell adhesion molecule 21                            |   |
| CECR6    | Cat eye syndrome chromosome region, candidate 6                                       |   |
| CELSR2   | Cadherin, EGF LAG seven-pass G-type receptor 2 (flamingo homolog, <i>Drosophila</i> ) |   |
| CELSR3   | Cadherin, EGF LAG seven-pass G-type receptor 3 (flamingo homolog, <i>Drosophila</i> ) |   |
| CENPK    | Centromere protein K                                                                  |   |
| CEP120   | Centrosomal protein 120 kDa                                                           |   |
| CEP170   | Centrosomal protein 170 kDa                                                           |   |
| CEP192   | Centrosomal protein 192 kDa                                                           |   |
| CEP63    | Centrosomal protein 63 kDa                                                            |   |
| CEP68    | Centrosomal protein 68 kDa                                                            |   |
| CEP85    | Centrosomal protein 85 kDa                                                            |   |
| CEP89    | Centrosomal protein 89 kDa                                                            |   |
| CERCAM   | Cerebral endothelial cell adhesion molecule                                           |   |
| CERS6    | Ceramide synthase 6                                                                   |   |
| CFH      | Complement factor H                                                                   |   |
| CFHR5    | Complement factor H-related 5                                                         |   |
| CFI      | Complement factor I                                                                   |   |
| CFLAR    | CASP8 and FADD-like apoptosis regulator                                               |   |

|              |                                                                        |   |
|--------------|------------------------------------------------------------------------|---|
| CFP          | Complement factor properdin                                            |   |
| CGN          | Cingulin                                                               |   |
| CGNL1        | Cingulin-like 1                                                        |   |
| CHAF1A       | Chromatin assembly factor 1, subunit A (p150)                          |   |
| CHCHD5       | Coiled-coil-helix-coiled-coil-helix domain containing 5                |   |
| CHD1         | Chromodomain helicase DNA binding protein 1                            |   |
| CHD2         | Chromodomain helicase DNA binding protein 2                            |   |
| CHD3         | Chromodomain helicase DNA binding protein 3                            |   |
| CHD7         | Chromodomain helicase DNA binding protein 7                            |   |
| CHDH         | Choline dehydrogenase                                                  |   |
| <b>CHEK2</b> | <b>CHK2 checkpoint homolog (<i>S. Pombe</i>)</b>                       | √ |
| CHGB         | Chromogranin B (secretogranin 1)                                       |   |
| CHMP1A       | Charged multivesicular body protein 1A                                 |   |
| CHMP1B       | Charged multivesicular body protein 1B                                 |   |
| CHMP4C       | Charged multivesicular body protein 4C                                 |   |
| CHPF         | Chondroitin polymerizing factor                                        |   |
| CHRD         | Chordin                                                                |   |
| CHRNA2       | Cholinergic receptor, nicotinic, alpha 2 (neuronal)                    |   |
| CHRNA5       | Cholinergic receptor, nicotinic, alpha 5                               |   |
| CHRNB1       | Cholinergic receptor, nicotinic, beta 1 (muscle)                       |   |
| CHST15       | Carbohydrate (N-acetylgalactosamine 4-sulfate 6-O) sulfotransferase 15 |   |
| CHSY1        | Chondroitin sulfate synthase 1                                         |   |
| CHUK         | Conserved helix-loop-helix ubiquitous kinase                           |   |
| CIRBP        | Cold inducible RNA binding protein                                     |   |
| CKAP2L       | Cytoskeleton associated protein 2-like                                 |   |
| CLASP2       | Cytoplasmic linker associated protein 2                                |   |
| CLC          | Charcot-Leyden crystal protein                                         |   |
| CLCF1        | Cardiotrophin-like cytokine factor 1                                   |   |
| CLCN3        | Chloride channel 3                                                     |   |
| CLCN4        | Chloride channel 4                                                     |   |
| CLDN15       | Claudin 15                                                             |   |
| CLDN18       | Claudin 18                                                             |   |
| CLDN19       | Claudin 19                                                             |   |
| CLDN5        | Claudin 5                                                              |   |
| CLDN9        | Claudin 9                                                              |   |
| CLDND2       | Claudin domain containing 2                                            |   |



|         |                                                                                            |  |
|---------|--------------------------------------------------------------------------------------------|--|
| CLEC2B  | C-type lectin domain family 2, member B                                                    |  |
| CLEC5A  | C-type lectin domain family 5, member A                                                    |  |
| CLIC6   | Chloride intracellular channel 6                                                           |  |
| CLIP1   | CAP-GLY domain containing linker protein 1                                                 |  |
| CLIP2   | CAP-GLY domain containing linker protein 2                                                 |  |
| CLIP3   | CAP-GLY domain containing linker protein 3                                                 |  |
| CLIP4   | CAP-GLY domain containing linker protein family, member 4                                  |  |
| CLN8    | Ceroid-lipofuscinosis, neuronal 8 (epilepsy, progressive with mental retardation)          |  |
| CLPP    | Clpp caseinolytic peptidase, ATP-dependent, proteolytic subunit homolog ( <i>E. Coli</i> ) |  |
| CLPTM1  | Cleft lip and palate associated transmembrane protein 1                                    |  |
| CLPTM1L | CLPTM1-like                                                                                |  |
| CLSTN1  | Calsyntenin 1                                                                              |  |
| CLSTN3  | Calsyntenin 3                                                                              |  |
| CMAS    | Cytidine monophosphate <i>N</i> -acetylneuraminic acid synthetase                          |  |
| CMBL    | Carboxymethylenebutenolidase homolog ( <i>Pseudomonas</i> )                                |  |
| CMKLR1  | Chemokine-like receptor 1                                                                  |  |
| CNBP    | CCHC-type zinc finger, nucleic acid binding protein                                        |  |
| CNGA4   | Cyclic nucleotide gated channel alpha 4                                                    |  |
| CNGB1   | Cyclic nucleotide gated channel beta 1                                                     |  |
| CNKSR2  | Connector enhancer of kinase suppressor of Ras 2                                           |  |
| CNN2    | Calponin 2                                                                                 |  |
| CNNM2   | Cyclin M2                                                                                  |  |
| CNOT6L  | CCR4-NOT transcription complex, subunit 6-like                                             |  |
| CNPY2   | Canopy 2 homolog (zebrafish)                                                               |  |
| CNR2    | Cannabinoid receptor 2 (macrophage)                                                        |  |
| CNTN2   | Contactin 2 (axonal)                                                                       |  |
| CNTRL   | Centriolin                                                                                 |  |
| COBL    | Cordon-bleu homolog (mouse)                                                                |  |
| COG1    | Component of oligomeric golgi complex 1                                                    |  |
| COG4    | Component of oligomeric golgi complex 4                                                    |  |
| COG5    | Component of oligomeric golgi complex 5                                                    |  |
| COG7    | Component of oligomeric golgi complex 7                                                    |  |
| COL11A1 | Collagen, type XI, alpha 1                                                                 |  |
| COL12A1 | Collagen, type XII, alpha 1                                                                |  |
| COL14A1 | Collagen, type XIV, alpha 1                                                                |  |
| COL17A1 | Collagen, type XVII, alpha 1                                                               |  |

|          |                                                                      |   |
|----------|----------------------------------------------------------------------|---|
| COL18A1  | Collagen, type XVIII, alpha 1                                        |   |
| COL1A2   | Collagen, type I, alpha 2                                            |   |
| COL22A1  | Collagen, type XXII, alpha 1                                         |   |
| COL27A1  | Collagen, type XXVII, alpha 1                                        |   |
| COL3A1   | Collagen, type III, alpha 1                                          |   |
| COL4A1   | Collagen, type IV, alpha 1                                           |   |
| COL4A3   | Collagen, type IV, alpha 3 (Goodpasture antigen)                     |   |
| COL4A6   | Collagen, type IV, alpha 6                                           |   |
| COL9A2   | Collagen, type IX, alpha 2                                           |   |
| COLEC10  | Collectin sub-family member 10 (C-type lectin)                       |   |
| COLEC12  | Collectin sub-family member 12                                       |   |
| COPA     | Coatomer protein complex, subunit alpha                              |   |
| COPS7A   | COP9 constitutive photomorphogenic homolog subunit 7A (Arabidopsis)  |   |
| COPS7B   | COP9 constitutive photomorphogenic homolog subunit 7B (Arabidopsis)  |   |
| COQ6     | Coenzyme Q6 homolog, monooxygenase ( <i>S. Cerevisiae</i> )          |   |
| CORIN    | Corin, serine peptidase                                              |   |
| CORO1A   | Coronin, actin binding protein, 1A                                   |   |
| CORO2B   | Coronin, actin binding protein, 2B                                   |   |
| CORO6    | Coronin 6                                                            |   |
| COX19    | COX19 cytochrome c oxidase assembly homolog ( <i>S. Cerevisiae</i> ) |   |
| CPA2     | Carboxypeptidase A2 (pancreatic)                                     |   |
| CPAMD8   | C3 and PZP-like, alpha-2-macroglobulin domain containing 8           |   |
| CPEB2    | Cytoplasmic polyadenylation element binding protein 2                |   |
| CPNE4    | Copine IV                                                            |   |
| CPNE5    | Copine V                                                             |   |
| CPNE6    | Copine VI (neuronal)                                                 |   |
| CPZ      | Carboxypeptidase Z                                                   |   |
| CR1L     | Complement component (3b/4b) receptor 1-like                         |   |
| CREB1    | Camp responsive element binding protein 1                            | √ |
| CRHR2    | Corticotropin releasing hormone receptor 2                           |   |
| CRIPT    | Cysteine-rich PDZ-binding protein                                    |   |
| CRISPLD1 | Cysteine-rich secretory protein LCCL domain containing 1             |   |
| CRLS1    | Cardiolipin synthase 1                                               |   |
| CRY2     | Cryptochrome 2 (photolyase-like)                                     |   |
| CRYGA    | Crystallin, gamma A                                                  |   |
| CS       | Citrate synthase                                                     |   |

|               |                                                                                        |   |
|---------------|----------------------------------------------------------------------------------------|---|
| CSE1L         | CSE1 chromosome segregation 1-like (yeast)                                             |   |
| CSF1          | Colony stimulating factor 1 (macrophage)                                               |   |
| CSF1R         | Colony stimulating factor 1 receptor                                                   |   |
| CSGALNACT1    | Chondroitin sulfate N-acetylgalactosaminyltransferase 1                                |   |
| CSMD3         | CUB and Sushi multiple domains 3                                                       |   |
| CSNK2B        | Casein kinase 2, beta polypeptide                                                      |   |
| CSPG4         | Chondroitin sulfate proteoglycan 4                                                     |   |
| CSRP2BP       | CSRP2 binding protein                                                                  |   |
| CSTB          | Cystatin B (stefin B)                                                                  |   |
| CSTF2         | Cleavage stimulation factor, 3' pre-RNA, subunit 2, 64 kDa                             |   |
| CTB-134H23.1  | Nuclear pore complex-interacting protein-like 1                                        |   |
| CTCF          | CCCTC-binding factor (zinc finger protein)                                             |   |
| CTDSP1        | CTD (carboxy-terminal domain, RNA polymerase II, polypeptide A) small phosphatase 1    |   |
| CTDSPL        | CTD (carboxy-terminal domain, RNA polymerase II, polypeptide A) small phosphatase-like |   |
| CTH           | Cystathionase (cystathionine gamma-lyase)                                              |   |
| CTIF          | CBP80/20-dependent translation initiation factor                                       |   |
| <b>CTNNB1</b> | <b>Catenin (cadherin-associated protein), beta 1, 88 kDa</b>                           | √ |
| CTNND1        | Catenin (cadherin-associated protein), delta 1                                         |   |
| CTRC          | Chymotrypsin C (caldecrin)                                                             |   |
| CTSA          | Cathepsin A                                                                            |   |
| CTSB          | Cathepsin B                                                                            |   |
| CTSD          | Cathepsin D                                                                            |   |
| CTU2          | Cytosolic thiouridylase subunit 2 homolog ( <i>S. Pombe</i> )                          |   |
| CUBN          | Cubilin (intrinsic factor-cobalamin receptor)                                          |   |
| CUEDC1        | CUE domain containing 1                                                                |   |
| CUL1          | Cullin 1                                                                               |   |
| CUL5          | Cullin 5                                                                               |   |
| CUX2          | Cut-like homeobox 2                                                                    |   |
| CXCL3         | Chemokine (C-X-C motif) ligand 3                                                       |   |
| CXCR6         | Chemokine (C-X-C motif) receptor 6                                                     |   |
| CYCS          | Cytochrome c, somatic                                                                  |   |
| CYFIP1        | Cytoplasmic FMR1 interacting protein 1                                                 |   |
| CYFIP2        | Cytoplasmic FMR1 interacting protein 2                                                 |   |
| <b>CYLD</b>   | <b>Cylindromatosis (turban tumor syndrome)</b>                                         | √ |
| CYP11A1       | Cytochrome P450, family 11, subfamily A, polypeptide 1                                 |   |
| CYP1A1        | Cytochrome P450, family 1, subfamily A, polypeptide 1                                  |   |

|             |                                                          |   |
|-------------|----------------------------------------------------------|---|
| CYP7A1      | Cytochrome P450, family 7, subfamily A, polypeptide 1    |   |
| D2HGDH      | D-2-hydroxyglutarate dehydrogenase                       |   |
| DAAM2       | Dishevelled associated activator of morphogenesis 2      |   |
| DAG1        | Dystroglycan 1 (dystrophin-associated glycoprotein 1)    |   |
| DAGLB       | Diacylglycerol lipase, beta                              |   |
| DAPK1       | Death-associated protein kinase 1                        |   |
| DARC        | Duffy blood group, chemokine receptor                    |   |
| DBC1        | Deleted in bladder cancer 1                              |   |
| DBF4B       | DBF4 homolog B ( <i>S. Cerevisiae</i> )                  |   |
| DBNL        | Drebrin-like                                             |   |
| DCAF10      | DDB1 and CUL4 associated factor 10                       |   |
| DCAF12      | DDB1 and CUL4 associated factor 12                       |   |
| DCAF12L1    | DDB1 and CUL4 associated factor 12-like 1                |   |
| DCLK2       | Doublecortin-like kinase 2                               |   |
| DCP2        | DCP2 decapping enzyme homolog ( <i>S. Cerevisiae</i> )   |   |
| DCTN4       | Dynactin 4 (p62)                                         |   |
| DCX         | Doublecortin                                             |   |
| DDB1        | Damage-specific DNA binding protein 1, 127 kDa           |   |
| <b>DDB2</b> | <b>Damage-specific DNA binding protein 2, 48 kDa</b>     | √ |
| DDC         | Dopa decarboxylase (aromatic L-amino acid decarboxylase) |   |
| DDIT4       | DNA-damage-inducible transcript 4                        |   |
| DDN         | Dendrin                                                  |   |
| DDX11       | DEAD/H (Asp-Glu-Ala-Asp/His) box polypeptide 11          |   |
| DDX19A      | DEAD (Asp-Glu-Ala-As) box polypeptide 19A                |   |
| DDX20       | DEAD (Asp-Glu-Ala-Asp) box polypeptide 20                |   |
| DDX23       | DEAD (Asp-Glu-Ala-Asp) box polypeptide 23                |   |
| DDX26B      | DEAD/H (Asp-Glu-Ala-Asp/His) box polypeptide 26B         |   |
| DDX39B      | DEAD (Asp-Glu-Ala-Asp) box polypeptide 39B               |   |
| DDX52       | DEAD (Asp-Glu-Ala-Asp) box polypeptide 52                |   |
| DDX54       | DEAD (Asp-Glu-Ala-Asp) box polypeptide 54                |   |
| DDX58       | DEAD (Asp-Glu-Ala-Asp) box polypeptide 58                |   |
| DEDD        | Death effector domain containing                         |   |
| DENND2C     | DENN/MADD domain containing 2C                           |   |
| DEPDC5      | DEP domain containing 5                                  |   |
| DES         | Desmin                                                   |   |
| DEXI        | Dexi homolog (mouse)                                     |   |

|         |                                                        |  |
|---------|--------------------------------------------------------|--|
| DGCR14  | Digeorge syndrome critical region gene 14              |  |
| DGCR8   | Digeorge syndrome critical region gene 8               |  |
| DGKA    | Diacylglycerol kinase, alpha 80 kDa                    |  |
| DGKB    | Diacylglycerol kinase, beta 90 kDa                     |  |
| DGKD    | Diacylglycerol kinase, delta 130 kDa                   |  |
| DGKG    | Diacylglycerol kinase, gamma 90 kDa                    |  |
| DHPS    | Deoxyhypusine synthase                                 |  |
| DHRS7   | Dehydrogenase/reductase (SDR family) member 7          |  |
| DHRSX   | Dehydrogenase/reductase (SDR family) X-linked          |  |
| DHX16   | DEAH (Asp-Glu-Ala-His) box polypeptide 16              |  |
| DHX30   | DEAH (Asp-Glu-Ala-His) box polypeptide 30              |  |
| DHX35   | DEAH (Asp-Glu-Ala-His) box polypeptide 35              |  |
| DHX40   | DEAH (Asp-Glu-Ala-His) box polypeptide 40              |  |
| DIAPH1  | Diaphanous homolog 1 (Drosophila)                      |  |
| DIDO1   | Death inducer-obliterator 1                            |  |
| DISP1   | Dispatched homolog 1 (Drosophila)                      |  |
| DKK3    | Dickkopf homolog 3 ( <i>Xenopus laevis</i> )           |  |
| DLEC1   | Deleted in lung and esophageal cancer 1                |  |
| DLG2    | Discs, large homolog 2 (Drosophila)                    |  |
| DLG3    | Discs, large homolog 3 (Drosophila)                    |  |
| DLG4    | Discs, large homolog 4 (Drosophila)                    |  |
| DLGAP2  | Discs, large (Drosophila) homolog-associated protein 2 |  |
| DLGAP3  | Discs, large (Drosophila) homolog-associated protein 3 |  |
| DLL1    | Delta-like 1 (Drosophila)                              |  |
| DMKN    | Dermokine                                              |  |
| DMPK    | Dystrophia myotonica-protein kinase                    |  |
| DMRTA1  | DMRT-like family A1                                    |  |
| DMTF1   | Cyclin D binding myb-like transcription factor 1       |  |
| DMWD    | Dystrophia myotonica, WD repeat containing             |  |
| DNAH11  | Dynein, axonemal, heavy chain 11                       |  |
| DNAH12  | Dynein, axonemal, heavy chain 12                       |  |
| DNAH14  | Dynein, axonemal, heavy chain 14                       |  |
| DNAH2   | Dynein, axonemal, heavy chain 2                        |  |
| DNAJB12 | Dnaj (Hsp40) homolog, subfamily B, member 12           |  |
| DNAJB5  | Dnaj (Hsp40) homolog, subfamily B, member 5            |  |
| DNAJB7  | Dnaj (Hsp40) homolog, subfamily B, member 7            |  |

|               |                                                             |   |
|---------------|-------------------------------------------------------------|---|
| DNAJC16       | Dnaj (Hsp40) homolog, subfamily C, member 16                |   |
| DNAJC18       | Dnaj (Hsp40) homolog, subfamily C, member 18                |   |
| DNAJC6        | Dnaj (Hsp40) homolog, subfamily C, member 6                 |   |
| DNAJC9        | Dnaj (Hsp40) homolog, subfamily C, member 9                 |   |
| DNALI1        | Dynein, axonemal, light intermediate chain 1                |   |
| DNM3          | Dynamamin 3                                                 |   |
| <b>DNMT3A</b> | <b>DNA (cytosine-5-)-methyltransferase 3 alpha</b>          | √ |
| DOCK5         | Dedicator of cytokinesis 5                                  |   |
| DOCK6         | Dedicator of cytokinesis 6                                  |   |
| DOCK8         | Dedicator of cytokinesis 8                                  |   |
| DPEP1         | Dipeptidase 1 (renal)                                       |   |
| DPF1          | D4, zinc and double PHD fingers family 1                    |   |
| DPP6          | Dipeptidyl-peptidase 6                                      |   |
| DPP9          | Dipeptidyl-peptidase 9                                      |   |
| DPY19L3       | Dpy-19-like 3 ( <i>C. Elegans</i> )                         |   |
| DPYSL5        | Dihydropyrimidinase-like 5                                  |   |
| DSCAM         | Down syndrome cell adhesion molecule                        |   |
| DSE           | Dermatan sulfate epimerase                                  |   |
| DSEL          | Dermatan sulfate epimerase-like                             |   |
| DSG4          | Desmoglein 4                                                |   |
| DSP           | Desmoplakin                                                 |   |
| DSPP          | Dentin sialophosphoprotein                                  |   |
| DST           | Dystonin                                                    |   |
| DSTYK         | Dual serine/threonine and tyrosine protein kinase           |   |
| DTD1          | D-tyrosyl-trna deacylase 1 homolog ( <i>S. Cerevisiae</i> ) |   |
| DTWD2         | DTW domain containing 2                                     |   |
| DTYMK         | Deoxythymidylate kinase (thymidylate kinase)                |   |
| DUS4L         | Dihydrouridine synthase 4-like ( <i>S. Cerevisiae</i> )     |   |
| DUSP18        | Dual specificity phosphatase 18                             |   |
| DUSP21        | Dual specificity phosphatase 21                             |   |
| DUSP27        | Dual specificity phosphatase 27 (putative)                  |   |
| DUSP6         | Dual specificity phosphatase 6                              |   |
| DVL1          | Dishevelled, dsh homolog 1 ( <i>Drosophila</i> )            |   |
| DYNC1H1       | Dynein, cytoplasmic 1, heavy chain 1                        |   |
| DYNC1LI2      | Dynein, cytoplasmic 1, light intermediate chain 2           |   |
| DYNC2H1       | Dynein, cytoplasmic 2, heavy chain 1                        |   |

|         |                                                                   |   |
|---------|-------------------------------------------------------------------|---|
| DYNLT1  | Dynein, light chain, Tctex-type 1                                 |   |
| DYRK1A  | Dual-specificity tyrosine-(Y)-phosphorylation regulated kinase 1A |   |
| DYRK1B  | Dual-specificity tyrosine-(Y)-phosphorylation regulated kinase 1B |   |
| DYX1C1- | DYX1C1-CCPG1 readthrough (non-protein coding)                     |   |
| DZIP3   | DAZ interacting protein 3, zinc finger                            |   |
| EAF1    | ELL associated factor 1                                           |   |
| EARS2   | Glutamyl-trna synthetase 2, mitochondrial (putative)              |   |
| EBF3    | Early B-cell factor 3                                             |   |
| ECI1    | Enoyl-coa delta isomerase 1                                       |   |
| EED     | Embryonic ectoderm development                                    |   |
| EFCAB3  | EF-hand calcium binding domain 3                                  |   |
| EFCAB5  | EF-hand calcium binding domain 5                                  |   |
| EFCAB8  | EF-hand calcium binding domain 8                                  |   |
| EFS     | Embryonal Fyn-associated substrate                                |   |
| EGF     | Epidermal growth factor                                           |   |
| EHBP1   | EH domain binding protein 1                                       |   |
| EHBP1L1 | EH domain binding protein 1-like 1                                |   |
| EHMT1   | Euchromatic histone-lysine N-methyltransferase 1                  |   |
| EID2B   | EP300 interacting inhibitor of differentiation 2B                 |   |
| EIF2AK1 | Eukaryotic translation initiation factor 2-alpha kinase 1         |   |
| EIF2AK2 | Eukaryotic translation initiation factor 2-alpha kinase 2         |   |
| EIF2AK4 | Eukaryotic translation initiation factor 2 alpha kinase 4         |   |
| EIF2C1  | Eukaryotic translation initiation factor 2C, 1                    |   |
| EIF2C4  | Eukaryotic translation initiation factor 2C, 4                    |   |
| EIF3D   | Eukaryotic translation initiation factor 3, subunit D             |   |
| EIF3E   | Eukaryotic translation initiation factor 3, subunit E             |   |
| EIF3F   | Eukaryotic translation initiation factor 3, subunit F             |   |
| EIF3L   | Eukaryotic translation initiation factor 3, subunit L             |   |
| EIF4E3  | Eukaryotic translation initiation factor 4E family member 3       |   |
| EIF4G1  | Eukaryotic translation initiation factor 4 gamma, 1               |   |
| EIF4G2  | Eukaryotic translation initiation factor 4 gamma, 2               |   |
| ELF1    | E74-like factor 1 (ets domain transcription factor)               |   |
| ELK1    | ELK1, member of ETS oncogene family                               |   |
| ELK4    | ELK4, ETS-domain protein (SRF accessory protein 1)                | √ |
| ELMO1   | Engulfment and cell motility 1                                    |   |
| ELMOD1  | ELMO/CED-12 domain containing 1                                   |   |

|         |                                                                                       |   |
|---------|---------------------------------------------------------------------------------------|---|
| EMILIN2 | Elastin microfibril interfacier 2                                                     |   |
| EML3    | Echinoderm microtubule associated protein like 3                                      |   |
| EMR1    | Egf-like module containing, mucin-like, hormone receptor-like 1                       |   |
| EN1     | Engrailed homeobox 1                                                                  |   |
| ENDOD1  | Endonuclease domain containing 1                                                      |   |
| ENPP6   | Ectonucleotide pyrophosphatase/phosphodiesterase 6                                    |   |
| ENSA    | Endosulfine alpha                                                                     |   |
| ENTHD1  | ENTH domain containing 1                                                              |   |
| EP400   | E1A binding protein p400                                                              |   |
| EP400NL | EP400 N-terminal like                                                                 |   |
| EPAS1   | Endothelial PAS domain protein 1                                                      |   |
| EPB41L1 | Erythrocyte membrane protein band 4.1-like 1                                          |   |
| EPC1    | Enhancer of polycomb homolog 1 (Drosophila)                                           |   |
| EPHA1   | EPH receptor A1                                                                       |   |
| EPHA3   | EPH receptor A3                                                                       |   |
| EPHA5   | EPH receptor A5                                                                       |   |
| EPHA8   | EPH receptor A8                                                                       |   |
| EPHB1   | EPH receptor B1                                                                       |   |
| EPHB4   | EPH receptor B4                                                                       |   |
| EPN2    | Epsin 2                                                                               |   |
| EPS15   | Epidermal growth factor receptor pathway substrate 15                                 | √ |
| EPS15L1 | Epidermal growth factor receptor pathway substrate 15-like 1                          |   |
| ERAP2   | Endoplasmic reticulum aminopeptidase 2                                                |   |
| ERBB3   | V-erb-b2 erythroblastic leukemia viral oncogene homolog 3 (avian)                     |   |
| ERCC8   | Excision repair cross-complementing rodent repair deficiency, complementation group 8 |   |
| EREG    | Epiregulin                                                                            |   |
| ERI3    | ERI1 exoribonuclease family member 3                                                  |   |
| ERLIN1  | ER lipid raft associated 1                                                            |   |
| ERMAP   | Erythroblast membrane-associated protein (Scianna blood group)                        |   |
| ERMN    | Ermin, ERM-like protein                                                               |   |
| ERN1    | Endoplasmic reticulum to nucleus signaling 1                                          |   |
| ERO1LB  | ERO1-like beta ( <i>S. Cerevisiae</i> )                                               |   |
| ESAM    | Endothelial cell adhesion molecule                                                    |   |
| ESCO1   | Establishment of cohesion 1 homolog 1 ( <i>S. Cerevisiae</i> )                        |   |
| ESF1    | ESF1, nucleolar pre-rna processing protein, homolog ( <i>S. Cerevisiae</i> )          |   |
| ESM1    | Endothelial cell-specific molecule 1                                                  |   |



|          |                                                             |  |
|----------|-------------------------------------------------------------|--|
| ESRP2    | Epithelial splicing regulatory protein 2                    |  |
| ETFDH    | Electron-transferring-flavoprotein dehydrogenase            |  |
| ETNK2    | Ethanolamine kinase 2                                       |  |
| ETS1     | V-ets erythroblastosis virus E26 oncogene homolog 1 (avian) |  |
| ETS2     | V-ets erythroblastosis virus E26 oncogene homolog 2 (avian) |  |
| EVC      | Ellis van Creveld syndrome                                  |  |
| EVPL     | Envoplakin                                                  |  |
| EVX1     | Even-skipped homeobox 1                                     |  |
| EXOC3L1  | Exocyst complex component 3-like 1                          |  |
| EXOSC3   | Exosome component 3                                         |  |
| EXOSC9   | Exosome component 9                                         |  |
| F11      | Coagulation factor XI                                       |  |
| F2RL3    | Coagulation factor II (thrombin) receptor-like 3            |  |
| FABP5    | Fatty acid binding protein 5 (psoriasis-associated)         |  |
| FADS2    | Fatty acid desaturase 2                                     |  |
| FAIM2    | Fas apoptotic inhibitory molecule 2                         |  |
| FAM101B  | Family with sequence similarity 101, member B               |  |
| FAM105A  | Family with sequence similarity 105, member A               |  |
| FAM105B  | Family with sequence similarity 105, member B               |  |
| FAM111B  | Family with sequence similarity 111, member B               |  |
| FAM114A1 | Family with sequence similarity 114, member A1              |  |
| FAM115A  | Family with sequence similarity 115, member A               |  |
| FAM118A  | Family with sequence similarity 118, member A               |  |
| FAM118B  | Family with sequence similarity 118, member B               |  |
| FAM125B  | Family with sequence similarity 125, member B               |  |
| FAM129A  | Family with sequence similarity 129, member A               |  |
| FAM134A  | Family with sequence similarity 134, member A               |  |
| FAM134B  | Family with sequence similarity 134, member B               |  |
| FAM160A1 | Family with sequence similarity 160, member A1              |  |
| FAM164C  | Family with sequence similarity 164, member C               |  |
| FAM166B  | Family with sequence similarity 166, member B               |  |
| FAM167A  | Family with sequence similarity 167, member A               |  |
| FAM168B  | Family with sequence similarity 168, member B               |  |
| FAM170B  | Family with sequence similarity 170, member B               |  |
| FAM171A2 | Family with sequence similarity 171, member A2              |  |
| FAM179A  | Family with sequence similarity 179, member A               |  |

|         |                                                                             |   |
|---------|-----------------------------------------------------------------------------|---|
| FAM181A | Family with sequence similarity 181, member A                               |   |
| FAM183A | Family with sequence similarity 183, member A                               |   |
| FAM186B | Family with sequence similarity 186, member B                               |   |
| FAM189B | Family with sequence similarity 189, member B                               |   |
| FAM190B | Family with sequence similarity 190, member B                               |   |
| FAM201A | Family with sequence similarity 201, member A                               |   |
| FAM26E  | Family with sequence similarity 26, member E                                |   |
| FAM27D1 | Protein FAM27D1                                                             |   |
| FAM3A   | Family with sequence similarity 3, member A                                 |   |
| FAM53B  | Family with sequence similarity 53, member B                                |   |
| FAM57A  | Family with sequence similarity 57, member A                                |   |
| FAM63B  | Family with sequence similarity 63, member B                                |   |
| FAM65A  | Family with sequence similarity 65, member A                                |   |
| FAM65C  | Family with sequence similarity 65, member C                                |   |
| FAM71F2 | Family with sequence similarity 71, member F2                               |   |
| FAM75D1 | Family with sequence similarity 75, member D1                               |   |
| FAM78A  | Family with sequence similarity 78, member A                                |   |
| FAM82A2 | Family with sequence similarity 82, member A2                               |   |
| FAM83G  | Family with sequence similarity 83, member G                                |   |
| FAM84A  | Family with sequence similarity 84, member A                                |   |
| FAM86A  | Family with sequence similarity 86, member A                                |   |
| FAM9B   | Family with sequence similarity 9, member B                                 |   |
| FANCA   | Fanconi anemia, complementation group A                                     | √ |
| FANCC   | Fanconi anemia, complementation group C                                     | √ |
| FAP     | Fibroblast activation protein, alpha                                        |   |
| FAR2    | Fatty acyl coa reductase 2                                                  |   |
| FARP1   | FERM, rhogef (ARHGEF) and pleckstrin domain protein 1 (chondrocyte-derived) |   |
| FARP2   | FERM, rhogef and pleckstrin domain protein 2                                |   |
| FASTKD1 | FAST kinase domains 1                                                       |   |
| FAT2    | FAT tumor suppressor homolog 2 (Drosophila)                                 |   |
| FAT3    | FAT tumor suppressor homolog 3 (Drosophila)                                 |   |
| FAT4    | FAT tumor suppressor homolog 4 (Drosophila)                                 |   |
| FBL     | Fibrillarin                                                                 |   |
| FBLIM1  | Filamin binding LIM protein 1                                               |   |
| FBLN1   | Fibulin 1                                                                   |   |
| FBN1    | Fibrillin 1                                                                 |   |

|              |                                                           |   |
|--------------|-----------------------------------------------------------|---|
| FBN3         | Fibrillin 3                                               |   |
| FBRSL1       | Fibrosin-like 1                                           |   |
| FBXL20       | F-box and leucine-rich repeat protein 20                  |   |
| FBXO10       | F-box protein 10                                          |   |
| FBXO16       | F-box protein 16                                          |   |
| FBXO44       | F-box protein 44                                          |   |
| FBXO48       | F-box protein 48                                          |   |
| FBXO8        | F-box protein 8                                           |   |
| FBXO9        | F-box protein 9                                           |   |
| FBXW11       | F-box and WD repeat domain containing 11                  |   |
| FCHSD1       | FCH and double SH3 domains 1                              |   |
| FCRL5        | Fc receptor-like 5                                        |   |
| FCRLA        | Fc receptor-like A                                        |   |
| FDFT1        | Farnesyl-diphosphate farnesyltransferase 1                |   |
| FEN1         | Flap structure-specific endonuclease 1                    |   |
| FER          | Fer (fps/fes related) tyrosine kinase                     |   |
| FER1L6       | Fer-1-like 6 ( <i>C. Elegans</i> )                        |   |
| FETUB        | Fetuin B                                                  |   |
| FEZ2         | Fasciculation and elongation protein zeta 2 (zygin II)    |   |
| FGD4         | FYVE, rhogef and PH domain containing 4                   |   |
| FGD5         | FYVE, rhogef and PH domain containing 5                   |   |
| FGF12        | Fibroblast growth factor 12                               |   |
| FGF23        | Fibroblast growth factor 23                               |   |
| <b>FGFR2</b> | <b>Fibroblast growth factor receptor 2</b>                | √ |
| FGL2         | Fibrinogen-like 2                                         |   |
| FHAD1        | Forkhead-associated (FHA) phosphopeptide binding domain 1 |   |
| FHL2         | Four and a half LIM domains 2                             |   |
| FHL3         | Four and a half LIM domains 3                             |   |
| FHOD3        | Formin homology 2 domain containing 3                     |   |
| FITM2        | Fat storage-inducing transmembrane protein 2              |   |
| FKBP14       | FK506 binding protein 14, 22 kDa                          |   |
| FKBP8        | FK506 binding protein 8, 38 kDa                           |   |
| FLG          | Filaggrin                                                 |   |
| FLNC         | Filamin C, gamma                                          |   |
| FLOT2        | Flotillin 2                                               |   |
| FLRT2        | Fibronectin leucine rich transmembrane protein 2          |   |

|              |                                                                                   |   |
|--------------|-----------------------------------------------------------------------------------|---|
| FLT4         | Fms-related tyrosine kinase 4                                                     |   |
| FLVCR1       | Feline leukemia virus subgroup C cellular receptor 1                              |   |
| FLYWCH1      | FLYWCH-type zinc finger 1                                                         |   |
| FMN2         | Formin 2                                                                          |   |
| FMNL3        | Formin-like 3                                                                     |   |
| FMO1         | Flavin containing monooxygenase 1                                                 |   |
| FNIP1        | Folliculin interacting protein 1                                                  |   |
| FNIP2        | Folliculin interacting protein 2                                                  |   |
| FOSL2        | FOS-like antigen 2                                                                |   |
| <b>FOXP1</b> | <b>Forkhead box P1</b>                                                            | √ |
| FOXS1        | Forkhead box S1                                                                   |   |
| FRAS1        | Fraser syndrome 1                                                                 |   |
| FRAT1        | Frequently rearranged in advanced T-cell lymphomas                                |   |
| FRG1B        | FSHD region gene 1 family, member B                                               |   |
| FRMD3        | FERM domain containing 3                                                          |   |
| FRMD4B       | FERM domain containing 4B                                                         |   |
| FRYL         | FRY-like                                                                          |   |
| FSCN1        | Fascin homolog 1, actin-bundling protein ( <i>Strongylocentrotus purpuratus</i> ) |   |
| FSD2         | Fibronectin type III and SPRY domain containing 2                                 |   |
| FTMT         | Ferritin mitochondrial                                                            |   |
| FTO          | Fat mass and obesity associated                                                   |   |
| FUBP3        | Far upstream element (FUSE) binding protein 3                                     |   |
| <b>FUS</b>   | <b>Fused in sarcoma</b>                                                           | √ |
| FUT10        | Fucosyltransferase 10 (alpha (1,3) fucosyltransferase)                            |   |
| FUT2         | Fucosyltransferase 2 (secretor status included)                                   |   |
| G2E3         | G2/M-phase specific E3 ubiquitin protein ligase                                   |   |
| G3BP2        | Gtpase activating protein (SH3 domain) binding protein 2                          |   |
| G6PD         | Glucose-6-phosphate dehydrogenase                                                 |   |
| GAA          | Glucosidase, alpha; acid                                                          |   |
| GAB2         | GRB2-associated binding protein 2                                                 |   |
| GABPB2       | GA binding protein transcription factor, beta subunit 2                           |   |
| GABRE        | Gamma-aminobutyric acid (GABA) A receptor, epsilon                                |   |
| GAD1         | Glutamate decarboxylase 1 (brain, 67 kDa)                                         |   |
| GAL3ST1      | Galactose-3-O-sulfotransferase 1                                                  |   |
| GALK1        | Galactokinase 1                                                                   |   |
| GALNS        | Galactosamine (N-acetyl)-6-sulfate sulfatase                                      |   |

|         |                                                                                                  |  |
|---------|--------------------------------------------------------------------------------------------------|--|
| GALNT13 | UDP-N-acetyl-alpha-D-galactosamine:polypeptide N-acetylgalactosaminyltransferase 13 (galnac-T13) |  |
| GALNT14 | UDP-N-acetyl-alpha-D-galactosamine:polypeptide N-acetylgalactosaminyltransferase 14 (galnac-T14) |  |
| GALNTL1 | UDP-N-acetyl-alpha-D-galactosamine:polypeptide N-acetylgalactosaminyltransferase-like 1          |  |
| GALNTL4 | UDP-N-acetyl-alpha-D-galactosamine:polypeptide N-acetylgalactosaminyltransferase-like 4          |  |
| GALT    | Galactose-1-phosphate uridylyltransferase                                                        |  |
| GAPDH   | Glyceraldehyde-3-phosphate dehydrogenase                                                         |  |
| GAPDHS  | Glyceraldehyde-3-phosphate dehydrogenase, spermatogenic                                          |  |
| GAPT    | GRB2-binding adaptor protein, transmembrane                                                      |  |
| GAR1    | GAR1 ribonucleoprotein homolog (yeast)                                                           |  |
| GART    | Phosphoribosylglycinamide formyltransferase, phosphoribosylglycinamide synthetase,               |  |
| GAS1    | Growth arrest-specific 1                                                                         |  |
| GATAD2A | GATA zinc finger domain containing 2A                                                            |  |
| GATAD2B | GATA zinc finger domain containing 2B                                                            |  |
| GBX1    | Gastrulation brain homeobox 1                                                                    |  |
| GCC1    | GRIP and coiled-coil domain containing 1                                                         |  |
| GCOM1   | GRINL1A complex locus                                                                            |  |
| GDE1    | Glycerophosphodiester phosphodiesterase 1                                                        |  |
| GDF10   | Growth differentiation factor 10                                                                 |  |
| GDF5OS  | Growth differentiation factor 5 opposite strand                                                  |  |
| GDI2    | GDP dissociation inhibitor 2                                                                     |  |
| GET4    | Golgi to ER traffic protein 4 homolog ( <i>S. Cerevisiae</i> )                                   |  |
| GFM1    | G elongation factor, mitochondrial 1                                                             |  |
| GFOD1   | Glucose-fructose oxidoreductase domain containing 1                                              |  |
| GFRA1   | GDNF family receptor alpha 1                                                                     |  |
| GFRA2   | GDNF family receptor alpha 2                                                                     |  |
| GGA1    | Golgi-associated, gamma adaptin ear containing, ARF binding protein 1                            |  |
| GGT1    | Gamma-glutamyltransferase 1                                                                      |  |
| GGT5    | Gamma-glutamyltransferase 5                                                                      |  |
| GGTLC1  | Gamma-glutamyltransferase light chain 1                                                          |  |
| GIMAP1  | Gtpase, IMAP family member 1                                                                     |  |
| GINS4   | GINS complex subunit 4 (Sld5 homolog)                                                            |  |
| GIPC1   | GIPC PDZ domain containing family, member 1                                                      |  |
| GIT1    | G protein-coupled receptor kinase interacting arfgap 1                                           |  |
| GJC1    | Gap junction protein, gamma 1, 45 kDa                                                            |  |
| GK2     | Glycerol kinase 2                                                                                |  |
| GLB1L2  | Galactosidase, beta 1-like 2                                                                     |  |

|             |                                                          |   |
|-------------|----------------------------------------------------------|---|
| GLIPR2      | GLI pathogenesis-related 2                               |   |
| GLIS2       | GLIS family zinc finger 2                                |   |
| GLRA3       | Glycine receptor, alpha 3                                |   |
| GLRX        | Glutaredoxin (thioltransferase)                          |   |
| GLRX5       | Glutaredoxin 5                                           |   |
| GLS         | Glutaminase                                              |   |
| GLT25D1     | Glycosyltransferase 25 domain containing 1               |   |
| GLTSCR1     | Glioma tumor suppressor candidate region gene 1          |   |
| GLTSCR2     | Glioma tumor suppressor candidate region gene 2          |   |
| GLYCTK      | Glycerate kinase                                         |   |
| GMEB1       | Glucocorticoid modulatory element binding protein 1      |   |
| GMEB2       | Glucocorticoid modulatory element binding protein 2      |   |
| GMPPB       | GDP-mannose pyrophosphorylase B                          |   |
| GNA13       | Guanine nucleotide binding protein (G protein), alpha 13 |   |
| <b>GNAS</b> | <b>GNAS complex locus</b>                                | √ |
| GNL1        | Guanine nucleotide binding protein-like 1                |   |
| GNL3        | Guanine nucleotide binding protein-like 3 (nucleolar)    |   |
| GNPDA1      | Glucosamine-6-phosphate deaminase 1                      |   |
| GOLGA3      | Golgin A3                                                |   |
| GOLGA6L9    | Golgin A6 family-like 9                                  |   |
| GOLGA7B     | Golgin A7 family, member B                               |   |
| GOLM1       | Golgi membrane protein 1                                 |   |
| GOLT1A      | Golgi transport 1A                                       |   |
| GORASP2     | Golgi reassembly stacking protein 2, 55 kDa              |   |
| GP1BA       | Glycoprotein Ib (platelet), alpha polypeptide            |   |
| GP5         | Glycoprotein V (platelet)                                |   |
| GPATCH1     | G patch domain containing 1                              |   |
| GPATCH4     | G patch domain containing 4                              |   |
| GPR1        | G protein-coupled receptor 1                             |   |
| GPR108      | G protein-coupled receptor 108                           |   |
| GPR116      | G protein-coupled receptor 116                           |   |
| GPR126      | G protein-coupled receptor 126                           |   |
| GPR135      | G protein-coupled receptor 135                           |   |
| GPR144      | G protein-coupled receptor 144                           |   |
| GPR148      | G protein-coupled receptor 148                           |   |
| GPR162      | G protein-coupled receptor 162                           |   |

|           |                                                                                                          |  |
|-----------|----------------------------------------------------------------------------------------------------------|--|
| GPR176    | G protein-coupled receptor 176                                                                           |  |
| GPR37     | G protein-coupled receptor 37 (endothelin receptor type B-like)                                          |  |
| GPR62     | G protein-coupled receptor 62                                                                            |  |
| GPR64     | G protein-coupled receptor 64                                                                            |  |
| GPR78     | G protein-coupled receptor 78                                                                            |  |
| GPR98     | G protein-coupled receptor 98                                                                            |  |
| GPRASP1   | G protein-coupled receptor associated sorting protein 1                                                  |  |
| GPRASP2   | G protein-coupled receptor associated sorting protein 2                                                  |  |
| GPRIN2    | G protein regulated inducer of neurite outgrowth 2                                                       |  |
| GRAP2     | GRB2-related adaptor protein 2                                                                           |  |
| GRB2      | Growth factor receptor-bound protein 2                                                                   |  |
| GRIK1     | Glutamate receptor, ionotropic, kainate 1                                                                |  |
| GRIK3     | Glutamate receptor, ionotropic, kainate 3                                                                |  |
| GRIK4     | Glutamate receptor, ionotropic, kainate 4                                                                |  |
| GRIN1     | Glutamate receptor, ionotropic, <i>N</i> -methyl D-aspartate 1                                           |  |
| GRIN2A    | Glutamate receptor, ionotropic, <i>N</i> -methyl D-aspartate 2A                                          |  |
| GRIN2C    | Glutamate receptor, ionotropic, <i>N</i> -methyl D-aspartate 2C                                          |  |
| GRM4      | Glutamate receptor, metabotropic 4                                                                       |  |
| GRN       | Granulin                                                                                                 |  |
| GSN       | Gelsolin                                                                                                 |  |
| GTF2A1    | General transcription factor IIA, 1, 19/37 kDa                                                           |  |
| GTF2A2    | General transcription factor IIA, 2, 12kda                                                               |  |
| GTF2H4    | General transcription factor IIIH, polypeptide 4, 52kda                                                  |  |
| GTF2IRD1  | GTF2I repeat domain containing 1                                                                         |  |
| GTF2IRD2B | GTF2I repeat domain containing 2B                                                                        |  |
| GTPBP10   | GTP-binding protein 10 (putative)                                                                        |  |
| GUCY2D    | Guanylate cyclase 2D, membrane (retina-specific)                                                         |  |
| GUF1      | GUF1 gtpase homolog ( <i>S. Cerevisiae</i> )                                                             |  |
| GXYLT1    | Glucoside xylosyltransferase 1                                                                           |  |
| GYLTL1B   | Glycosyltransferase-like 1B                                                                              |  |
| H1FOO     | H1 histone family, member O, oocyte-specific                                                             |  |
| H1FX      | H1 histone family, member X                                                                              |  |
| HABP2     | Hyaluronan binding protein 2                                                                             |  |
| HADHA     | Hydroxyacyl-coa dehydrogenase/3-ketoacyl-coa thiolase/enoyl-coa hydratase (trifunctional protein), alpha |  |
| HAPLN2    | Hyaluronan and proteoglycan link protein 2                                                               |  |
| HAPLN4    | Hyaluronan and proteoglycan link protein 4                                                               |  |

|          |                                                                                                     |   |
|----------|-----------------------------------------------------------------------------------------------------|---|
| HARS     | Histidyl-trna synthetase                                                                            |   |
| HAUS3    | HAUS augmin-like complex, subunit 3                                                                 |   |
| HAUS6    | HAUS augmin-like complex, subunit 6                                                                 |   |
| HCAR1    | Hydroxycarboxylic acid receptor 1                                                                   |   |
| HCFC2    | Host cell factor C2                                                                                 |   |
| HCN4     | Hyperpolarization activated cyclic nucleotide-gated potassium channel 4                             |   |
| HDAC2    | Histone deacetylase 2                                                                               |   |
| HDAC4    | Histone deacetylase 4                                                                               |   |
| HDAC6    | Histone deacetylase 6                                                                               |   |
| HDAC7    | Histone deacetylase 7                                                                               |   |
| HDAC9    | Histone deacetylase 9                                                                               |   |
| HDLBP    | High density lipoprotein binding protein                                                            |   |
| HEATR1   | HEAT repeat containing 1                                                                            |   |
| HEATR2   | HEAT repeat containing 2                                                                            |   |
| HEATR5B  | HEAT repeat containing 5B                                                                           |   |
| HECA     | Headcase homolog (Drosophila)                                                                       |   |
| HECTD2   | HECT domain containing 2                                                                            |   |
| HECTD3   | HECT domain containing 3                                                                            |   |
| HEG1     | HEG homolog 1 (zebrafish)                                                                           |   |
| HEMK1    | Hemk methyltransferase family member 1                                                              |   |
| HEPACAM2 | HEPACAM family member 2                                                                             |   |
| HERC1    | Hect (homologous to the E6-AP (UBE3A) carboxyl terminus) domain and RCC1 (CHC1)-like domain (RLD) 1 |   |
| HERC2    | Hect domain and RLD 2                                                                               |   |
| HERC3    | Hect domain and RLD 3                                                                               |   |
| HERC6    | Hect domain and RLD 6                                                                               |   |
| HGFAC    | HGF activator                                                                                       |   |
| HGS      | Hepatocyte growth factor-regulated tyrosine kinase substrate                                        |   |
| HGSNAT   | Heparan-alpha-glucosaminide N-acetyltransferase                                                     |   |
| HIP1     | Huntingtin interacting protein 1                                                                    | √ |
| HIPK3    | Homeodomain interacting protein kinase 3                                                            |   |
| HIPK4    | Homeodomain interacting protein kinase 4                                                            |   |
| HIST1H4H | Histone cluster 1, H4h                                                                              |   |
| HIVEP3   | Human immunodeficiency virus type I enhancer binding protein 3                                      |   |
| HK3      | Hexokinase 3 (white cell)                                                                           |   |
| HLA-A    | Major histocompatibility complex, class I, A                                                        |   |
| HLA-B    | Major histocompatibility complex, class I, B                                                        |   |



|               |                                                                                          |   |
|---------------|------------------------------------------------------------------------------------------|---|
| HLA-DRB5      | Major histocompatibility complex, class II, DR beta 5                                    |   |
| HLA-E         | Major histocompatibility complex, class I, E                                             |   |
| HLA-G         | Major histocompatibility complex, class I, G                                             |   |
| HLCS          | Holocarboxylase synthetase (biotin-(propionyl-coa-carboxylase (ATP-hydrolysing)) ligase) |   |
| <b>HLF</b>    | <b>Hepatic leukemia factor</b>                                                           | √ |
| HMBS          | Hydroxymethylbilane synthase                                                             |   |
| HMCN1         | Hemicentin 1                                                                             |   |
| <b>HMGA2</b>  | <b>High mobility group AT-hook 2</b>                                                     | √ |
| HMGB4         | High mobility group box 4                                                                |   |
| HMMR          | Hyaluronan-mediated motility receptor (RHAMM)                                            |   |
| HMX2          | H6 family homeobox 2                                                                     |   |
| HN1           | Hematological and neurological expressed 1                                               |   |
| HN1L          | Hematological and neurological expressed 1-like                                          |   |
| HNF4A         | Hepatocyte nuclear factor 4, alpha                                                       |   |
| HNF4G         | Hepatocyte nuclear factor 4, gamma                                                       |   |
| HNRNPA1L2     | Heterogeneous nuclear ribonucleoprotein A1-like 2                                        |   |
| HNRNPR        | Heterogeneous nuclear ribonucleoprotein R                                                |   |
| HOGA1         | 4-hydroxy-2-oxoglutarate aldolase 1                                                      |   |
| HOMER3        | Homer homolog 3 (Drosophila)                                                             |   |
| HOXA10        | Homeobox A10                                                                             |   |
| <b>HOXD11</b> | <b>Homeobox D11</b>                                                                      | √ |
| HOXD3         | Homeobox D3                                                                              |   |
| HP1BP3        | Heterochromatin protein 1, binding protein 3                                             |   |
| HPCA          | Hippocalcin                                                                              |   |
| HPS1          | Hermansky-Pudlak syndrome 1                                                              |   |
| HPS4          | Hermansky-Pudlak syndrome 4                                                              |   |
| HRASLS2       | HRAS-like suppressor 2                                                                   |   |
| HRASLS5       | HRAS-like suppressor family, member 5                                                    |   |
| HRH1          | Histamine receptor H1                                                                    |   |
| HRH2          | Histamine receptor H2                                                                    |   |
| HS2ST1        | Heparan sulfate 2-O-sulfotransferase 1                                                   |   |
| HSD17B13      | Hydroxysteroid (17-beta) dehydrogenase 13                                                |   |
| HSD17B7       | Hydroxysteroid (17-beta) dehydrogenase 7                                                 |   |
| HSPA12A       | Heat shock 70 kDa protein 12A                                                            |   |
| HSPA4         | Heat shock 70 kDa protein 4                                                              |   |
| HSPA9         | Heat shock 70 kDa protein 9 (mortalin)                                                   |   |

|         |                                                                             |  |
|---------|-----------------------------------------------------------------------------|--|
| HSPB3   | Heat shock 27 kDa protein 3                                                 |  |
| HSPG2   | Heparan sulfate proteoglycan 2                                              |  |
| HTATSF1 | HIV-1 Tat specific factor 1                                                 |  |
| HTR4    | 5-hydroxytryptamine (serotonin) receptor 4                                  |  |
| HTRA4   | Htra serine peptidase 4                                                     |  |
| HUNK    | Hormonally up-regulated Neu-associated kinase                               |  |
| HUWE1   | HECT, UBA and WWE domain containing 1                                       |  |
| HVCN1   | Hydrogen voltage-gated channel 1                                            |  |
| HYAL4   | Hyaluronoglucosaminidase 4                                                  |  |
| IAH1    | Isoamyl acetate-hydrolyzing esterase 1 homolog ( <i>S. Cerevisiae</i> )     |  |
| IBA57   | IBA57, iron-sulfur cluster assembly homolog ( <i>S. Cerevisiae</i> )        |  |
| ICAM4   | Intercellular adhesion molecule 4 (Landsteiner-Wiener blood group)          |  |
| ICOSLG  | Inducible T-cell co-stimulator ligand                                       |  |
| IDE     | Insulin-degrading enzyme                                                    |  |
| IDS     | Iduronate 2-sulfatase                                                       |  |
| IFITM10 | Interferon induced transmembrane protein 10                                 |  |
| IFT122  | Intraflagellar transport 122 homolog ( <i>Chlamydomonas</i> )               |  |
| IFT140  | Intraflagellar transport 140 homolog ( <i>Chlamydomonas</i> )               |  |
| IGDCC4  | Immunoglobulin superfamily, DCC subclass, member 4                          |  |
| IGF1R   | Insulin-like growth factor 1 receptor                                       |  |
| IGFBP3  | Insulin-like growth factor binding protein 3                                |  |
| IGFBP5  | Insulin-like growth factor binding protein 5                                |  |
| IGFBPL1 | Insulin-like growth factor binding protein-like 1                           |  |
| IGSF5   | Immunoglobulin superfamily, member 5                                        |  |
| IKBKG   | Inhibitor of kappa light polypeptide gene enhancer in B-cells, kinase gamma |  |
| IKZF3   | IKAROS family zinc finger 3 ( <i>Aiolos</i> )                               |  |
| IL11RA  | Interleukin 11 receptor, alpha                                              |  |
| IL12RB1 | Interleukin 12 receptor, beta 1                                             |  |
| IL13RA1 | Interleukin 13 receptor, alpha 1                                            |  |
| IL13RA2 | Interleukin 13 receptor, alpha 2                                            |  |
| IL17A   | Interleukin 17A                                                             |  |
| IL17C   | Interleukin 17C                                                             |  |
| IL17RE  | Interleukin 17 receptor E                                                   |  |
| IL17REL | Interleukin 17 receptor E-like                                              |  |
| IL1R1   | Interleukin 1 receptor, type I                                              |  |
| IL1RAP  | Interleukin 1 receptor accessory protein                                    |  |

|          |                                                                                          |   |
|----------|------------------------------------------------------------------------------------------|---|
| IL1RL1   | Interleukin 1 receptor-like 1                                                            |   |
| IL20RA   | Interleukin 20 receptor, alpha                                                           |   |
| IL27RA   | Interleukin 27 receptor, alpha                                                           |   |
| IL2RA    | Interleukin 2 receptor, alpha                                                            |   |
| IL32     | Interleukin 32                                                                           |   |
| IL6R     | Interleukin 6 receptor                                                                   |   |
| IL7R     | Interleukin 7 receptor                                                                   | √ |
| INCENP   | Inner centromere protein antigens 135/155 kDa                                            |   |
| ING3     | Inhibitor of growth family, member 3                                                     |   |
| INHBA    | Inhibin, beta A                                                                          |   |
| INHBE    | Inhibin, beta E                                                                          |   |
| INMT     | Indolethylamine N-methyltransferase                                                      |   |
| INPP4A   | Inositol polyphosphate-4-phosphatase, type I, 107kda                                     |   |
| INPPL1   | Inositol polyphosphate phosphatase-like 1                                                |   |
| INSR     | Insulin receptor                                                                         |   |
| INTS1    | Integrator complex subunit 1                                                             |   |
| INTS5    | Integrator complex subunit 5                                                             |   |
| IPO9     | Importin 9                                                                               |   |
| IQCB1    | IQ motif containing B1                                                                   |   |
| IQCE     | IQ motif containing E                                                                    |   |
| IQGAP3   | IQ motif containing gtpase activating protein 3                                          |   |
| IQUB     | IQ motif and ubiquitin domain containing                                                 |   |
| IRF1     | Interferon regulatory factor 1                                                           |   |
| IRGQ     | Immunity-related gtpase family, Q                                                        |   |
| ISLR     | Immunoglobulin superfamily containing leucine-rich repeat                                |   |
| ITFG2    | Integrin alpha FG-GAP repeat containing 2                                                |   |
| ITGA10   | Integrin, alpha 10                                                                       |   |
| ITGA2B   | Integrin, alpha 2b (platelet glycoprotein iib of iib/iiia complex, antigen CD41)         |   |
| ITGA9    | Integrin, alpha 9                                                                        |   |
| ITGAE    | Integrin, alpha E (antigen CD103, human mucosal lymphocyte antigen 1; alpha polypeptide) |   |
| ITGB2    | Integrin, beta 2 (complement component 3 receptor 3 and 4 subunit)                       |   |
| ITGB4    | Integrin, beta 4                                                                         |   |
| ITGB7    | Integrin, beta 7                                                                         |   |
| ITM2C    | Integral membrane protein 2C                                                             |   |
| ITPR3    | Inositol 1,4,5-trisphosphate receptor, type 3                                            |   |
| ITPRIPL2 | Inositol 1,4,5-trisphosphate receptor interacting protein-like 2                         |   |

|          |                                                                                           |   |
|----------|-------------------------------------------------------------------------------------------|---|
| ITSN2    | Intersectin 2                                                                             |   |
| IVNS1ABP | Influenza virus NS1A binding protein                                                      |   |
| IYD      | Iodotyrosine deiodinase                                                                   |   |
| IZUMO4   | IZUMO family member 4                                                                     |   |
| JAKMIP3  | Janus kinase and microtubule interacting protein 3                                        |   |
| JAM3     | Junctional adhesion molecule 3                                                            |   |
| JARID2   | Jumonji, AT rich interactive domain 2                                                     |   |
| JMJD1C   | Jumonji domain containing 1C                                                              |   |
| JMJD5    | Jumonji domain containing 5                                                               |   |
| KALRN    | Kalirin, rhogef kinase                                                                    |   |
| KANK1    | KN motif and ankyrin repeat domains 1                                                     |   |
| KANK2    | KN motif and ankyrin repeat domains 2                                                     |   |
| KANK4    | KN motif and ankyrin repeat domains 4                                                     |   |
| KAT5     | K(lysine) acetyltransferase 5                                                             |   |
| KAT6A    | K(lysine) acetyltransferase 6A                                                            |   |
| KCNA4    | Potassium voltage-gated channel, shaker-related subfamily, member 4                       |   |
| KCNB1    | Potassium voltage-gated channel, Shab-related subfamily, member 1                         |   |
| KCNC1    | Potassium voltage-gated channel, Shaw-related subfamily, member 1                         |   |
| KCNC2    | Potassium voltage-gated channel, Shaw-related subfamily, member 2                         |   |
| KCNG1    | Potassium voltage-gated channel, subfamily G, member 1                                    |   |
| KCNG3    | Potassium voltage-gated channel, subfamily G, member 3                                    |   |
| KCNH2    | Potassium voltage-gated channel, subfamily H (eag-related), member 2                      |   |
| KCNH4    | Potassium voltage-gated channel, subfamily H (eag-related), member 4                      |   |
| KCNH5    | Potassium voltage-gated channel, subfamily H (eag-related), member 5                      |   |
| KCNJ12   | Potassium inwardly-rectifying channel, subfamily J, member 12                             |   |
| KCNJ14   | Potassium inwardly-rectifying channel, subfamily J, member 14                             |   |
| KCNJ5    | Potassium inwardly-rectifying channel, subfamily J, member 5                              | √ |
| KCNJ8    | Potassium inwardly-rectifying channel, subfamily J, member 8                              |   |
| KCNK1    | Potassium channel, subfamily K, member 1                                                  |   |
| KCNK18   | Potassium channel, subfamily K, member 18                                                 |   |
| KCNK3    | Potassium channel, subfamily K, member 3                                                  |   |
| KCNK6    | Potassium channel, subfamily K, member 6                                                  |   |
| KCNMB4   | Potassium large conductance calcium-activated channel, subfamily M, beta member 4         |   |
| KCNN2    | Potassium intermediate/small conductance calcium-activated channel, subfamily N, member 2 |   |
| KCNS2    | Potassium voltage-gated channel, delayed-rectifier, subfamily S, member 2                 |   |
| KCTD1    | Potassium channel tetramerisation domain containing 1                                     |   |

|            |                                                                            |   |
|------------|----------------------------------------------------------------------------|---|
| KCTD17     | Potassium channel tetramerisation domain containing 17                     |   |
| KCTD9      | Potassium channel tetramerisation domain containing 9                      |   |
| KDELC2     | KDEL (Lys-Asp-Glu-Leu) containing 2                                        |   |
| KDM2A      | Lysine (K)-specific demethylase 2A                                         |   |
| KDM2B      | Lysine (K)-specific demethylase 2B                                         |   |
| KDM4B      | Lysine (K)-specific demethylase 4B                                         |   |
| KDM6B      | Lysine (K)-specific demethylase 6B                                         |   |
| <b>KDR</b> | <b>Kinase insert domain receptor (a type III receptor tyrosine kinase)</b> | √ |
| KHNYN      | KH and NYN domain containing                                               |   |
| KIAA0090   | KIAA0090                                                                   |   |
| KIAA0100   | KIAA0100                                                                   |   |
| KIAA0195   | KIAA0195                                                                   |   |
| KIAA0196   | KIAA0196                                                                   |   |
| KIAA0247   | KIAA0247                                                                   |   |
| KIAA0317   | KIAA0317                                                                   |   |
| KIAA0319   | KIAA0319                                                                   |   |
| KIAA0408   | KIAA0408                                                                   |   |
| KIAA0430   | KIAA0430                                                                   |   |
| KIAA0513   | KIAA0513                                                                   |   |
| KIAA0528   | KIAA0528                                                                   |   |
| KIAA0564   | KIAA0564                                                                   |   |
| KIAA0889   | KIAA0889                                                                   |   |
| KIAA0913   | KIAA0913                                                                   |   |
| KIAA1109   | KIAA1109                                                                   |   |
| KIAA1244   | KIAA1244                                                                   |   |
| KIAA1267   | KIAA1267                                                                   |   |
| KIAA1274   | KIAA1274                                                                   |   |
| KIAA1328   | KIAA1328                                                                   |   |
| KIAA1407   | KIAA1407                                                                   |   |
| KIAA1522   | KIAA1522                                                                   |   |
| KIAA1598   | KIAA1598                                                                   |   |
| KIAA1737   | KIAA1737                                                                   |   |
| KIAA1755   | KIAA1755                                                                   |   |
| KIAA1967   | KIAA1967                                                                   |   |
| KIAA1984   | KIAA1984                                                                   |   |
| KIAA2018   | KIAA2018                                                                   |   |

|         |                                                                                   |   |
|---------|-----------------------------------------------------------------------------------|---|
| KIF14   | Kinesin family member 14                                                          |   |
| KIF19   | Kinesin family member 19                                                          |   |
| KIF21A  | Kinesin family member 21A                                                         |   |
| KIF21B  | Kinesin family member 21B                                                         |   |
| KIF23   | Kinesin family member 23                                                          |   |
| KIF24   | Kinesin family member 24                                                          |   |
| KIF26A  | Kinesin family member 26A                                                         |   |
| KIF26B  | Kinesin family member 26B                                                         |   |
| KIF3A   | Kinesin family member 3A                                                          |   |
| KIF6    | Kinesin family member 6                                                           |   |
| KIF7    | Kinesin family member 7                                                           |   |
| KIFC2   | Kinesin family member C2                                                          |   |
| KIN     | KIN, antigenic determinant of reca protein homolog (mouse)                        |   |
| KIR2DL4 | Killer cell immunoglobulin-like receptor, two domains, long cytoplasmic tail, 4   |   |
| KIR3DL3 | Killer cell immunoglobulin-like receptor, three domains, long cytoplasmic tail, 3 |   |
| KLF13   | Kruppel-like factor 13                                                            |   |
| KLF4    | Kruppel-like factor 4 (gut)                                                       | √ |
| KLHDC9  | Kelch domain containing 9                                                         |   |
| KLHL10  | Kelch-like 10 (Drosophila)                                                        |   |
| KLHL24  | Kelch-like 24 (Drosophila)                                                        |   |
| KLHL25  | Kelch-like 25 (Drosophila)                                                        |   |
| KLHL29  | Kelch-like 29 (Drosophila)                                                        |   |
| KLHL30  | Kelch-like 30 (Drosophila)                                                        |   |
| KLHL7   | Kelch-like 7 (Drosophila)                                                         |   |
| KLK15   | Kallikrein-related peptidase 15                                                   |   |
| KLK7    | Kallikrein-related peptidase 7                                                    |   |
| KLRD1   | Killer cell lectin-like receptor subfamily D, member 1                            |   |
| KLRG2   | Killer cell lectin-like receptor subfamily G, member 2                            |   |
| KLRK1   | Killer cell lectin-like receptor subfamily K, member 1                            |   |
| KNDC1   | Kinase non-catalytic C-lobe domain (KIND) containing 1                            |   |
| KNTC1   | Kinetochores associated 1                                                         |   |
| KPNA1   | Karyopherin alpha 1 (importin alpha 5)                                            |   |
| KPNA4   | Karyopherin alpha 4 (importin alpha 3)                                            |   |
| KPNA7   | Karyopherin alpha 7 (importin alpha 8)                                            |   |
| KREMEN1 | Kringle containing transmembrane protein 1                                        |   |
| KRT1    | Keratin 1                                                                         |   |

|              |                                                                                          |   |
|--------------|------------------------------------------------------------------------------------------|---|
| KRT24        | Keratin 24                                                                               |   |
| KRT3         | Keratin 3                                                                                |   |
| KRT72        | Keratin 72                                                                               |   |
| KRT74        | Keratin 74                                                                               |   |
| KRT79        | Keratin 79                                                                               |   |
| KRTAP10-7    | Keratin associated protein 10-7                                                          |   |
| KRTAP5-10    | Keratin associated protein 5-10                                                          |   |
| KRTAP5-5     | Keratin associated protein 5-5                                                           |   |
| KRTCAP2      | Keratinocyte associated protein 2                                                        |   |
| <b>KTN1</b>  | <b>Kinectin 1 (kinesin receptor)</b>                                                     | √ |
| KY           | Kyphoscoliosis peptidase                                                                 |   |
| KYNU         | Kynureninase                                                                             |   |
| LAD1         | Ladinin 1                                                                                |   |
| LAMA3        | Laminin, alpha 3                                                                         |   |
| LAMC2        | Laminin, gamma 2                                                                         |   |
| LAPTM4B      | Lysosomal protein transmembrane 4 beta                                                   |   |
| LARP4B       | La ribonucleoprotein domain family, member 4B                                            |   |
| <b>LASP1</b> | <b>LIM and SH3 protein 1</b>                                                             | √ |
| LAT2         | Linker for activation of T cells family, member 2                                        |   |
| LCLAT1       | Lysocardiolipin acyltransferase 1                                                        |   |
| LDB1         | LIM domain binding 1                                                                     |   |
| LDB3         | LIM domain binding 3                                                                     |   |
| LDLR         | Low density lipoprotein receptor                                                         |   |
| LEAP2        | Liver expressed antimicrobial peptide 2                                                  |   |
| LEMD3        | LEM domain containing 3                                                                  |   |
| LGALS12      | Lectin, galactoside-binding, soluble, 12                                                 |   |
| LGALS14      | Lectin, galactoside-binding, soluble, 14                                                 |   |
| LGALS7B      | Lectin, galactoside-binding, soluble, 7B                                                 |   |
| LGR5         | Leucine-rich repeat containing G protein-coupled receptor 5                              |   |
| LHFPL3       | Lipoma HMGIC fusion partner-like 3                                                       |   |
| LIG3         | Ligase III, DNA, ATP-dependent                                                           |   |
| LILRB4       | Leukocyte immunoglobulin-like receptor, subfamily B (with TM and ITIM domains), member 4 |   |
| LIMD1        | LIM domains containing 1                                                                 |   |
| LIN54        | Lin-54 homolog (C. Elegans)                                                              |   |
| LIPE         | Lipase, hormone-sensitive                                                                |   |
| LIPG         | Lipase, endothelial                                                                      |   |

|         |                                                                       |  |
|---------|-----------------------------------------------------------------------|--|
| LLPH    | LLP homolog, long-term synaptic facilitation (Aplysia)                |  |
| LMF2    | Lipase maturation factor 2                                            |  |
| LMNA    | Lamin A/C                                                             |  |
| LMX1A   | LIM homeobox transcription factor 1, alpha                            |  |
| LONRF2  | LON peptidase N-terminal domain and ring finger 2                     |  |
| LPAR2   | Lysophosphatidic acid receptor 2                                      |  |
| LPCAT1  | Lysophosphatidylcholine acyltransferase 1                             |  |
| LRBA    | LPS-responsive vesicle trafficking, beach and anchor containing       |  |
| LRIG1   | Leucine-rich repeats and immunoglobulin-like domains 1                |  |
| LRP1    | Low density lipoprotein receptor-related protein 1                    |  |
| LRP11   | Low density lipoprotein receptor-related protein 11                   |  |
| LRP2    | Low density lipoprotein receptor-related protein 2                    |  |
| LRP3    | Low density lipoprotein receptor-related protein 3                    |  |
| LRP4    | Low density lipoprotein receptor-related protein 4                    |  |
| LRP5    | Low density lipoprotein receptor-related protein 5                    |  |
| LRPAP1  | Low density lipoprotein receptor-related protein associated protein 1 |  |
| LRRC14  | Leucine rich repeat containing 14                                     |  |
| LRRC16A | Leucine rich repeat containing 16A                                    |  |
| LRRC23  | Leucine rich repeat containing 23                                     |  |
| LRRC32  | Leucine rich repeat containing 32                                     |  |
| LRRC33  | Leucine rich repeat containing 33                                     |  |
| LRRC4   | Leucine rich repeat containing 4                                      |  |
| LRRC40  | Leucine rich repeat containing 40                                     |  |
| LRRC49  | Leucine rich repeat containing 49                                     |  |
| LRRC4B  | Leucine rich repeat containing 4B                                     |  |
| LRRC4C  | Leucine rich repeat containing 4C                                     |  |
| LRRC66  | Leucine rich repeat containing 66                                     |  |
| LRRC8D  | Leucine rich repeat containing 8 family, member D                     |  |
| LRRC8E  | Leucine rich repeat containing 8 family, member E                     |  |
| LRRIQ1  | Leucine-rich repeats and IQ motif containing 1                        |  |
| LRRK1   | Leucine-rich repeat kinase 1                                          |  |
| LRRK2   | Leucine-rich repeat kinase 2                                          |  |
| LRRN4CL | LRRN4 C-terminal like                                                 |  |
| LTBP1   | Latent transforming growth factor beta binding protein 1              |  |
| LTN1    | Listerin E3 ubiquitin protein ligase 1                                |  |
| LUZP1   | Leucine zipper protein 1                                              |  |



|         |                                                                  |   |
|---------|------------------------------------------------------------------|---|
| LVRN    | Aminopeptidase Q                                                 |   |
| LY6G5B  | Lymphocyte antigen 6 complex, locus G5B                          |   |
| LY6G6F  | Lymphocyte antigen 6 complex, locus G6F                          |   |
| LYRM7   | Lym7 homolog (mouse)                                             |   |
| LYZL1   | Lysozyme-like 1                                                  |   |
| LYZL2   | Lysozyme-like 2                                                  |   |
| LZTFL1  | Leucine zipper transcription factor-like 1                       |   |
| MACF1   | Microtubule-actin crosslinking factor 1                          |   |
| MAFF    | V-maf musculoaponeurotic fibrosarcoma oncogene homolog F (avian) |   |
| MAFG    | V-maf musculoaponeurotic fibrosarcoma oncogene homolog G (avian) |   |
| MAGED4B | Melanoma antigen family D, 4B                                    |   |
| MAGEF1  | Melanoma antigen family F, 1                                     |   |
| MAGT1   | Magnesium transporter 1                                          |   |
| MAMDC4  | MAM domain containing 4                                          |   |
| MAML1   | Mastermind-like 1 (Drosophila)                                   |   |
| MAML2   | Mastermind-like 2 (Drosophila)                                   | √ |
| MAN2B1  | Mannosidase, alpha, class 2B, member 1                           |   |
| MAN2C1  | Mannosidase, alpha, class 2C, member 1                           |   |
| MAP1A   | Microtubule-associated protein 1A                                |   |
| MAP2K7  | Mitogen-activated protein kinase kinase 7                        |   |
| MAP3K1  | Mitogen-activated protein kinase kinase kinase 1                 |   |
| MAP3K13 | Mitogen-activated protein kinase kinase kinase 13                |   |
| MAP3K15 | Mitogen-activated protein kinase kinase kinase 15                |   |
| MAP3K6  | Mitogen-activated protein kinase kinase kinase 6                 |   |
| MAP3K9  | Mitogen-activated protein kinase kinase kinase 9                 |   |
| MAP4    | Microtubule-associated protein 4                                 |   |
| MAP4K1  | Mitogen-activated protein kinase kinase kinase kinase 1          |   |
| MAP4K4  | Mitogen-activated protein kinase kinase kinase kinase 4          |   |
| MAP7D3  | MAP7 domain containing 3                                         |   |
| MAPK1   | Mitogen-activated protein kinase 1                               |   |
| MAPK10  | Mitogen-activated protein kinase 10                              |   |
| MAPK11  | Mitogen-activated protein kinase 11                              |   |
| MAPK3   | Mitogen-activated protein kinase 3                               |   |
| MAPK4   | Mitogen-activated protein kinase 4                               |   |
| MAPK8   | Mitogen-activated protein kinase 8                               |   |
| MAPKBP1 | Mitogen-activated protein kinase binding protein 1               |   |

|              |                                                                                             |   |
|--------------|---------------------------------------------------------------------------------------------|---|
| MAPT         | Microtubule-associated protein tau                                                          |   |
| MARCH4       | Membrane-associated ring finger (C3HC4) 4, E3 ubiquitin protein ligase                      |   |
| MARCKS       | Myristoylated alanine-rich protein kinase C substrate                                       |   |
| MARCO        | Macrophage receptor with collagenous structure                                              |   |
| MARK2        | MAP/microtubule affinity-regulating kinase 2                                                |   |
| MARVELD2     | MARVEL domain containing 2                                                                  |   |
| MASP1        | Mannan-binding lectin serine peptidase 1 (C4/C2 activating component of Ra-reactive factor) |   |
| MAST1        | Microtubule associated serine/threonine kinase 1                                            |   |
| MAT1A        | Methionine adenosyltransferase I, alpha                                                     |   |
| MATR3        | Matrin 3                                                                                    |   |
| MBTPS1       | Membrane-bound transcription factor peptidase, site 1                                       |   |
| MC1R         | Melanocortin 1 receptor (alpha melanocyte stimulating hormone receptor)                     |   |
| MC2R         | Melanocortin 2 receptor (adrenocorticotrophic hormone)                                      |   |
| MCART6       | Mitochondrial carrier triple repeat 6                                                       |   |
| MCAT         | Malonyl coa:ACP acyltransferase (mitochondrial)                                             |   |
| MCF2         | MCF.2 cell line derived transforming sequence                                               |   |
| MCF2L        | MCF.2 cell line derived transforming sequence-like                                          |   |
| MCM10        | Minichromosome maintenance complex component 10                                             |   |
| MCM3AP       | Minichromosome maintenance complex component 3 associated protein                           |   |
| MDC1         | Mediator of DNA-damage checkpoint 1                                                         |   |
| MDGA2        | MAM domain containing glycosylphosphatidylinositol anchor 2                                 |   |
| <b>MDM4</b>  | <b>Mdm4 p53 binding protein homolog (mouse)</b>                                             | √ |
| MECP2        | Methyl cpg binding protein 2 (Rett syndrome)                                                |   |
| <b>MED12</b> | <b>Mediator complex subunit 12</b>                                                          | √ |
| MED13L       | Mediator complex subunit 13-like                                                            |   |
| MED29        | Mediator complex subunit 29                                                                 |   |
| MED7         | Mediator complex subunit 7                                                                  |   |
| MED8         | Mediator complex subunit 8                                                                  |   |
| MEGF8        | Multiple EGF-like-domains 8                                                                 |   |
| MEIS1        | Meis homeobox 1                                                                             |   |
| MEP1A        | Meprin A, alpha (PABA peptide hydrolase)                                                    |   |
| <b>MET</b>   | <b>Met proto-oncogene (hepatocyte growth factor receptor)</b>                               | √ |
| METTL1       | Methyltransferase like 1                                                                    |   |
| METTL21A     | Methyltransferase like 21A                                                                  |   |
| METTL7B      | Methyltransferase like 7B                                                                   |   |
| MFAP3        | Microfibrillar-associated protein 3                                                         |   |

|             |                                                                                                         |   |
|-------------|---------------------------------------------------------------------------------------------------------|---|
| MFAP4       | Microfibrillar-associated protein 4                                                                     |   |
| MFHAS1      | Malignant fibrous histiocytoma amplified sequence 1                                                     |   |
| MFN2        | Mitofusin 2                                                                                             |   |
| MFSD11      | Major facilitator superfamily domain containing 11                                                      |   |
| MFSD4       | Major facilitator superfamily domain containing 4                                                       |   |
| MFSD6       | Major facilitator superfamily domain containing 6                                                       |   |
| MGAT4A      | Mannosyl (alpha-1,3-)-glycoprotein beta-1,4- <i>N</i> -acetylglucosaminyltransferase, isozyme A         |   |
| MGAT5       | Mannosyl (alpha-1,6-)-glycoprotein beta-1,6- <i>N</i> -acetyl-glycosaminyltransferase                   |   |
| MGMT        | O-6-methylguanine-DNA methyltransferase                                                                 |   |
| MGRN1       | Mahogunin, ring finger 1                                                                                |   |
| MGST3       | Microsomal glutathione S-transferase 3                                                                  |   |
| MIA2        | Melanoma inhibitory activity 2                                                                          |   |
| MIA3        | Melanoma inhibitory activity family, member 3                                                           |   |
| MIER1       | Mesoderm induction early response 1 homolog ( <i>Xenopus laevis</i> )                                   |   |
| MIIP        | Migration and invasion inhibitory protein                                                               |   |
| MINOS1      | Mitochondrial inner membrane organizing system 1                                                        |   |
| MIPOL1      | Mirror-image polydactyly 1                                                                              |   |
| MIR4763     | Microrna 4763                                                                                           |   |
| <b>MKL1</b> | <b>Megakaryoblastic leukemia (translocation) 1</b>                                                      | √ |
| MLC1        | Megalencephalic leukoencephalopathy with subcortical cysts 1                                            |   |
| MLF2        | Myeloid leukemia factor 2                                                                               |   |
| MLL2        | Myeloid/lymphoid or mixed-lineage leukemia 2                                                            |   |
| <b>MLL3</b> | <b>Myeloid/lymphoid or mixed-lineage leukemia 3</b>                                                     | √ |
| MLLT11      | Myeloid/lymphoid or mixed-lineage leukemia (trithorax homolog, <i>Drosophila</i> ); translocated to, 11 |   |
| MLXIP       | MLX interacting protein                                                                                 |   |
| MME         | Membrane metallo-endopeptidase                                                                          |   |
| MMP25       | Matrix metalloproteinase 25                                                                             |   |
| MMRN1       | Multimerin 1                                                                                            |   |
| MOB1A       | MOB kinase activator 1A                                                                                 |   |
| MOCOS       | Molybdenum cofactor sulfurase                                                                           |   |
| MPDZ        | Multiple PDZ domain protein                                                                             |   |
| MPEG1       | Macrophage expressed 1                                                                                  |   |
| MPPED1      | Metallophosphoesterase domain containing 1                                                              |   |
| MPRIIP      | Myosin phosphatase Rho interacting protein                                                              |   |
| MPZL3       | Myelin protein zero-like 3                                                                              |   |
| MR1         | Major histocompatibility complex, class I-related                                                       |   |

|         |                                                                                    |   |
|---------|------------------------------------------------------------------------------------|---|
| MRPL52  | Mitochondrial ribosomal protein L52                                                |   |
| MRPS18B | Mitochondrial ribosomal protein S18B                                               |   |
| MRPS21  | Mitochondrial ribosomal protein S21                                                |   |
| MRPS25  | Mitochondrial ribosomal protein S25                                                |   |
| MRVII   | Murine retrovirus integration site 1 homolog                                       |   |
| MS4A10  | Membrane-spanning 4-domains, subfamily A, member 10                                |   |
| MS4A7   | Membrane-spanning 4-domains, subfamily A, member 7                                 |   |
| MSH3    | Muts homolog 3 ( <i>E. Coli</i> )                                                  |   |
| MSH5    | Muts homolog 5 ( <i>E. Coli</i> )                                                  |   |
| MSL3    | Male-specific lethal 3 homolog ( <i>Drosophila</i> )                               |   |
| MST1R   | Macrophage stimulating 1 receptor (c-met-related tyrosine kinase)                  |   |
| MTA1    | Metastasis associated 1                                                            |   |
| MTDH    | Metadherin                                                                         |   |
| MTF1    | Metal-regulatory transcription factor 1                                            |   |
| MTHFD1L | Methylenetetrahydrofolate dehydrogenase (NADP <sup>+</sup> dependent) 1-like       |   |
| MTHFR   | Methylenetetrahydrofolate reductase (NAD(P)H)                                      |   |
| MTMR10  | Myotubularin related protein 10                                                    |   |
| MTMR12  | Myotubularin related protein 12                                                    |   |
| MTMR14  | Myotubularin related protein 14                                                    |   |
| MTMR7   | Myotubularin related protein 7                                                     |   |
| MTNR1B  | Melatonin receptor 1B                                                              |   |
| MTOR    | Mechanistic target of rapamycin (serine/threonine kinase)                          |   |
| MTPN    | Myotrophin                                                                         |   |
| MUC12   | Mucin 12, cell surface associated                                                  |   |
| MUC2    | Mucin 2, oligomeric mucus/gel-forming                                              |   |
| MUC4    | Mucin 4, cell surface associated                                                   |   |
| MUM1    | Melanoma associated antigen (mutated) 1                                            |   |
| MUTYH   | Muty homolog ( <i>E. Coli</i> )                                                    | √ |
| MX1     | Myxovirus (influenza virus) resistance 1, interferon-inducible protein p78 (mouse) |   |
| MXD4    | MAX dimerization protein 4                                                         |   |
| MYADM   | Myeloid-associated differentiation marker                                          |   |
| MYB     | V-myb myeloblastosis viral oncogene homolog (avian)                                | √ |
| MYBL1   | V-myb myeloblastosis viral oncogene homolog (avian)-like 1                         |   |
| MYBL2   | V-myb myeloblastosis viral oncogene homolog (avian)-like 2                         |   |
| MYCBPAP | MYCBP associated protein                                                           |   |
| MYH11   | Myosin, heavy chain 11, smooth muscle                                              | √ |

|         |                                                           |   |
|---------|-----------------------------------------------------------|---|
| MYL1    | Myosin, light chain 1, alkali; skeletal, fast             |   |
| MYLK    | Myosin light chain kinase                                 |   |
| MYNN    | Myoneurin                                                 |   |
| MYO15B  | Myosin XVB pseudogene                                     |   |
| MYO18B  | Myosin XVIIIIB                                            |   |
| MYO19   | Myosin XIX                                                |   |
| MYO1C   | Myosin IC                                                 |   |
| MYO1G   | Myosin IG                                                 |   |
| MYO3B   | Myosin IIIB                                               |   |
| MYO5A   | Myosin VA                                                 |   |
| MYO5C   | Myosin VC                                                 |   |
| MYOD1   | Myogenic differentiation 1                                |   |
| MYOM2   | Myomesin (M-protein) 2, 165 kDa                           |   |
| MYOM3   | Myomesin family, member 3                                 |   |
| MYT1L   | Myelin transcription factor 1-like                        |   |
| NAA15   | N(alpha)-acetyltransferase 15, nata auxiliary subunit     |   |
| NACA    | Nascent polypeptide-associated complex alpha subunit      | √ |
| NACAD   | NAC alpha domain containing                               |   |
| NACC2   | NACC family member 2, BEN and BTB (POZ) domain containing |   |
| NAGK    | N-acetylglucosamine kinase                                |   |
| NAP1L4  | Nucleosome assembly protein 1-like 4                      |   |
| NAPEPLD | N-acyl phosphatidylethanolamine phospholipase D           |   |
| NAPSA   | Napsin A aspartic peptidase                               |   |
| NARF    | Nuclear prelamin A recognition factor                     |   |
| NAT10   | N-acetyltransferase 10 (GCN5-related)                     |   |
| NAT6    | N-acetyltransferase 6 (GCN5-related)                      |   |
| NAV1    | Neuron navigator 1                                        |   |
| NAV3    | Neuron navigator 3                                        |   |
| NBEA    | Neurobeachin                                              |   |
| NBEAL2  | Neurobeachin-like 2                                       |   |
| NCF2    | Neutrophil cytosolic factor 2                             |   |
| NCK2    | NCK adaptor protein 2                                     |   |
| NCKIPSD | NCK interacting protein with SH3 domain                   |   |
| NCL     | Nucleolin                                                 |   |
| NCOA2   | Nuclear receptor coactivator 2                            | √ |
| NCOA3   | Nuclear receptor coactivator 3                            |   |

|         |                                                                                    |   |
|---------|------------------------------------------------------------------------------------|---|
| NCOR2   | Nuclear receptor corepressor 2                                                     |   |
| NCS1    | Neuronal calcium sensor 1                                                          |   |
| NDRG4   | NDRG family member 4                                                               |   |
| NDUFA10 | NADH dehydrogenase (ubiquinone) 1 alpha subcomplex, 10, 42 kDa                     |   |
| NDUFB2  | NADH dehydrogenase (ubiquinone) 1 beta subcomplex, 2, 8 kDa                        |   |
| NDUFS1  | NADH dehydrogenase (ubiquinone) Fe-S protein 1, 75 kDa (NADH-coenzyme Q reductase) |   |
| NEB     | Nebulin                                                                            |   |
| NECAB2  | N-terminal EF-hand calcium binding protein 2                                       |   |
| NEGR1   | Neuronal growth regulator 1                                                        |   |
| NEIL2   | Nei endonuclease VIII-like 2 ( <i>E. Coli</i> )                                    |   |
| NEK11   | NIMA (never in mitosis gene a)- related kinase 11                                  |   |
| NEK7    | NIMA (never in mitosis gene a)-related kinase 7                                    |   |
| NEO1    | Neogenin 1                                                                         |   |
| NES     | Nestin                                                                             |   |
| NETO2   | Neuropilin (NRP) and tolloid (TLL)-like 2                                          |   |
| NEURL   | Neuralized homolog (Drosophila)                                                    |   |
| NEURL4  | Neuralized homolog 4 (Drosophila)                                                  |   |
| NEUROD2 | Neurogenic differentiation 2                                                       |   |
| NFAT5   | Nuclear factor of activated T-cells 5, tonicity-responsive                         |   |
| NFATC3  | Nuclear factor of activated T-cells, cytoplasmic, calcineurin-dependent 3          |   |
| NFIB    | Nuclear factor I/B                                                                 | √ |
| NFKBIB  | Nuclear factor of kappa light polypeptide gene enhancer in B-cells inhibitor, beta |   |
| NHSL1   | NHS-like 1                                                                         |   |
| NICN1   | Nicolin 1                                                                          |   |
| NINJ1   | Ninjurin 1                                                                         |   |
| NIP7    | Nuclear import 7 homolog ( <i>S. Cerevisiae</i> )                                  |   |
| NIPA1   | Non imprinted in Prader-Willi/Angelman syndrome 1                                  |   |
| NIPAL2  | NIPA-like domain containing 2                                                      |   |
| NIPAL4  | NIPA-like domain containing 4                                                      |   |
| NISCH   | Nischarin                                                                          |   |
| NIT2    | Nitrilase family, member 2                                                         |   |
| NKAIN1  | Na <sup>+</sup> /K <sup>+</sup> transporting atpase interacting 1                  |   |
| NKAIN2  | Na <sup>+</sup> /K <sup>+</sup> transporting atpase interacting 2                  |   |
| NKAPL   | NFKB activating protein-like                                                       |   |
| NKD2    | Naked cuticle homolog 2 (Drosophila)                                               |   |
| NKIRAS1 | NFKB inhibitor interacting Ras-like 1                                              |   |

|               |                                                                             |   |
|---------------|-----------------------------------------------------------------------------|---|
| NLE1          | Notchless homolog 1 (Drosophila)                                            |   |
| NLGN1         | Neuroigin 1                                                                 |   |
| NLGN2         | Neuroigin 2                                                                 |   |
| NLN           | Neurolysin (metallopeptidase M3 family)                                     |   |
| NLRC5         | NLR family, CARD domain containing 5                                        |   |
| NLRP12        | NLR family, pyrin domain containing 12                                      |   |
| NLRP14        | NLR family, pyrin domain containing 14                                      |   |
| NNT           | Nicotinamide nucleotide transhydrogenase                                    |   |
| NOL12         | Nucleolar protein 12                                                        |   |
| NOP14         | NOP14 nucleolar protein homolog (yeast)                                     |   |
| NOS3          | Nitric oxide synthase 3 (endothelial cell)                                  |   |
| <b>NOTCH2</b> | <b>Notch 2</b>                                                              | √ |
| NOV           | Nephroblastoma overexpressed gene                                           |   |
| NOX1          | NADPH oxidase 1                                                             |   |
| NOX5          | NADPH oxidase, EF-hand calcium binding domain 5                             |   |
| NPC1L1        | NPC1 (Niemann-Pick disease, type C1, gene)-like 1                           |   |
| NPDC1         | Neural proliferation, differentiation and control, 1                        |   |
| NPIPL1        | Nuclear pore complex interacting protein-like 1                             |   |
| NPLOC4        | Nuclear protein localization 4 homolog ( <i>S. Cerevisiae</i> )             |   |
| NR1I2         | Nuclear receptor subfamily 1, group I, member 2                             |   |
| NR3C1         | Nuclear receptor subfamily 3, group C, member 1 (glucocorticoid receptor)   |   |
| NRBP1         | Nuclear receptor binding protein 1                                          |   |
| NRCAM         | Neuronal cell adhesion molecule                                             |   |
| NRG1          | Neuregulin 1                                                                |   |
| NRIP1         | Nuclear receptor interacting protein 1                                      |   |
| NRK           | Nik related kinase                                                          |   |
| NRXN1         | Neurexin 1                                                                  |   |
| NRXN2         | Neurexin 2                                                                  |   |
| <b>NSD1</b>   | <b>Nuclear receptor binding SET domain protein 1</b>                        | √ |
| NT5C          | 5', 3'-nucleotidase, cytosolic                                              |   |
| NT5E          | 5'-nucleotidase, ecto (CD73)                                                |   |
| NTHL1         | Nth endonuclease III-like 1 (E. Coli)                                       |   |
| <b>NTRK3</b>  | <b>Neurotrophic tyrosine kinase, receptor, type 3</b>                       | √ |
| NUAK1         | NUAK family, SNF1-like kinase, 1                                            |   |
| NUCB1         | Nucleobindin 1                                                              |   |
| NUF2          | NUF2, NDC80 kinetochore complex component, homolog ( <i>S. Cerevisiae</i> ) |   |

|         |                                                                                |  |
|---------|--------------------------------------------------------------------------------|--|
| NUMBL   | Numb homolog (Drosophila)-like                                                 |  |
| NUP107  | Nucleoporin 107kda                                                             |  |
| NUP155  | Nucleoporin 155kda                                                             |  |
| NUPL1   | Nucleoporin like 1                                                             |  |
| NUS1    | Nuclear undecaprenyl pyrophosphate synthase 1 homolog ( <i>S. Cerevisiae</i> ) |  |
| NUTF2   | Nuclear transport factor 2                                                     |  |
| NWD1    | NACHT and WD repeat domain containing 1                                        |  |
| NXF5    | Nuclear RNA export factor 5                                                    |  |
| NYNRIN  | NYN domain and retroviral integrase containing                                 |  |
| O3FAR1  | Omega-3 fatty acid receptor 1                                                  |  |
| OAS2    | 2'-5'-oligoadenylate synthetase 2, 69/71 kDa                                   |  |
| OBSCN   | Obscurin, cytoskeletal calmodulin and titin-interacting rhogef                 |  |
| ODZ4    | Odz, odd Oz/ten-m homolog 4 (Drosophila)                                       |  |
| OLA1    | Obg-like atpase 1                                                              |  |
| OMG     | Oligodendrocyte myelin glycoprotein                                            |  |
| OPA3    | Optic atrophy 3 (autosomal recessive, with chorea and spastic paraplegia)      |  |
| OPN1MW  | Opsin 1 (cone pigments), medium-wave-sensitive                                 |  |
| OPN1MW2 | Opsin 1 (cone pigments), medium-wave-sensitive 2                               |  |
| OPN4    | Opsin 4                                                                        |  |
| OR10G2  | Olfactory receptor, family 10, subfamily G, member 2                           |  |
| OR10G8  | Olfactory receptor, family 10, subfamily G, member 8                           |  |
| OR10H3  | Olfactory receptor, family 10, subfamily H, member 3                           |  |
| OR10H4  | Olfactory receptor, family 10, subfamily H, member 4                           |  |
| OR13A1  | Olfactory receptor, family 13, subfamily A, member 1                           |  |
| OR1D2   | Olfactory receptor, family 1, subfamily D, member 2                            |  |
| OR2H1   | Olfactory receptor, family 2, subfamily H, member 1                            |  |
| OR2L3   | Olfactory receptor, family 2, subfamily L, member 3                            |  |
| OR2L8   | Olfactory receptor, family 2, subfamily L, member 8                            |  |
| OR2T29  | Olfactory receptor, family 2, subfamily T, member 29                           |  |
| OR2T5   | Olfactory receptor, family 2, subfamily T, member 5                            |  |
| OR4M1   | Olfactory receptor, family 4, subfamily M, member 1                            |  |
| OR5J2   | Olfactory receptor, family 5, subfamily J, member 2                            |  |
| OR7C1   | Olfactory receptor, family 7, subfamily C, member 1                            |  |
| OR7C2   | Olfactory receptor, family 7, subfamily C, member 2                            |  |
| OR7D2   | Olfactory receptor, family 7, subfamily D, member 2                            |  |
| OR8J3   | Olfactory receptor, family 8, subfamily J, member 3                            |  |



|             |                                                                              |  |
|-------------|------------------------------------------------------------------------------|--|
| OR9I1       | Olfactory receptor, family 9, subfamily I, member 1                          |  |
| ORAI2       | ORAI calcium release-activated calcium modulator 2                           |  |
| OSBPL11     | Oxysterol binding protein-like 11                                            |  |
| OSMR        | Oncostatin M receptor                                                        |  |
| OSR2        | Odd-skipped related 2 (Drosophila)                                           |  |
| OSTBETA     | Organic solute transporter subunit beta                                      |  |
| OTC         | Ornithine carbamoyltransferase                                               |  |
| OTOA        | Otoancorin                                                                   |  |
| OTOG        | Otogelin                                                                     |  |
| OTOS        | Otospiralin                                                                  |  |
| OVGP1       | Oviductal glycoprotein 1, 120kda                                             |  |
| OVOL1       | Ovo-like 1(Drosophila)                                                       |  |
| P2RX6       | Purinergic receptor P2X, ligand-gated ion channel, 6                         |  |
| P2RY4       | Pyrimidinergic receptor P2Y, G-protein coupled, 4                            |  |
| PACRGL      | PARK2 co-regulated-like                                                      |  |
| PACSN1      | Protein kinase C and casein kinase substrate in neurons 1                    |  |
| PAFAH1B1    | Platelet-activating factor acetylhydrolase 1b, regulatory subunit 1 (45 kDa) |  |
| PAG1        | Phosphoprotein associated with glycosphingolipid microdomains 1              |  |
| PAIP2B      | Poly(A) binding protein interacting protein 2B                               |  |
| PAK7        | P21 protein (Cdc42/Rac)-activated kinase 7                                   |  |
| PALM2-AKAP2 | PALM2-AKAP2 readthrough                                                      |  |
| PAN2        | PAN2 poly(A) specific ribonuclease subunit homolog ( <i>S. Cerevisiae</i> )  |  |
| PANK3       | Pantothenate kinase 3                                                        |  |
| PAPPA       | Pregnancy-associated plasma protein A, pappalysin 1                          |  |
| PAPPA2      | Pappalysin 2                                                                 |  |
| PAQR8       | Progesterin and adipoq receptor family member VIII                           |  |
| PARD3B      | Par-3 partitioning defective 3 homolog B ( <i>C. Elegans</i> )               |  |
| PARD6A      | Par-6 partitioning defective 6 homolog alpha ( <i>C. Elegans</i> )           |  |
| PARK2       | Parkinson protein 2, E3 ubiquitin protein ligase (parkin)                    |  |
| PARL        | Presenilin associated, rhomboid-like                                         |  |
| PARP10      | Poly (ADP-ribose) polymerase family, member 10                               |  |
| PARP2       | Poly (ADP-ribose) polymerase 2                                               |  |
| PARS2       | Prolyl-trna synthetase 2, mitochondrial (putative)                           |  |
| PARVG       | Parvin, gamma                                                                |  |
| PASK        | PAS domain containing serine/threonine kinase                                |  |
| PAX1        | Paired box 1                                                                 |  |

|          |                                                                              |   |
|----------|------------------------------------------------------------------------------|---|
| PAX6     | Paired box 6                                                                 |   |
| PAX8     | Paired box 8                                                                 | √ |
| PBRM1    | Polybromo 1                                                                  | √ |
| PBX2     | Pre-B-cell leukemia homeobox 2                                               |   |
| PBXIP1   | Pre-B-cell leukemia homeobox interacting protein 1                           |   |
| PCCA     | Propionyl coa carboxylase, alpha polypeptide                                 |   |
| PCDH11X  | Protocadherin 11 X-linked                                                    |   |
| PCDH11Y  | Protocadherin 11 Y-linked                                                    |   |
| PCDH19   | Protocadherin 19                                                             |   |
| PCDH7    | Protocadherin 7                                                              |   |
| PCDH8    | Protocadherin 8                                                              |   |
| PCDHAC1  | Protocadherin alpha subfamily C, 1                                           |   |
| PCDHB13  | Protocadherin beta 13                                                        |   |
| PCDHB16  | Protocadherin beta 16                                                        |   |
| PCDHB2   | Protocadherin beta 2                                                         |   |
| PCDHB4   | Protocadherin beta 4                                                         |   |
| PCDHB7   | Protocadherin beta 7                                                         |   |
| PCDHB8   | Protocadherin beta 8                                                         |   |
| PCDHGA1  | Protocadherin gamma subfamily A, 1                                           |   |
| PCDHGA10 | Protocadherin gamma subfamily A, 10                                          |   |
| PCDHGA12 | Protocadherin gamma subfamily A, 12                                          |   |
| PCDHGA2  | Protocadherin gamma subfamily A, 2                                           |   |
| PCDHGA3  | Protocadherin gamma subfamily A, 3                                           |   |
| PCDHGA6  | Protocadherin gamma subfamily A, 6                                           |   |
| PCDHGA8  | Protocadherin gamma subfamily A, 8                                           |   |
| PCDHGB1  | Protocadherin gamma subfamily B, 1                                           |   |
| PCDHGB2  | Protocadherin gamma subfamily B, 2                                           |   |
| PCDHGB4  | Protocadherin gamma subfamily B, 4                                           |   |
| PCDHGB7  | Protocadherin gamma subfamily B, 7                                           |   |
| PCDHGC4  | Protocadherin gamma subfamily C, 4                                           |   |
| PCID2    | PCI domain containing 2                                                      |   |
| PCMTD2   | Protein-L-isoaspartate (D-aspartate) O-methyltransferase domain containing 2 |   |
| PCSK4    | Proprotein convertase subtilisin/kexin type 4                                |   |
| PCSK6    | Proprotein convertase subtilisin/kexin type 6                                |   |
| PCYT1A   | Phosphate cytidyltransferase 1, choline, alpha                               |   |
| PDCD11   | Programmed cell death 11                                                     |   |

|         |                                                                             |   |
|---------|-----------------------------------------------------------------------------|---|
| PDCD6IP | Programmed cell death 6 interacting protein                                 |   |
| PDE1A   | Phosphodiesterase 1A, calmodulin-dependent                                  |   |
| PDE1C   | Phosphodiesterase 1C, calmodulin-dependent 70kda                            |   |
| PDE4B   | Phosphodiesterase 4B, camp-specific                                         |   |
| PDE6A   | Phosphodiesterase 6A, cgmp-specific, rod, alpha                             |   |
| PDE7B   | Phosphodiesterase 7B                                                        |   |
| PDGFRB  | Platelet-derived growth factor receptor, beta polypeptide                   | √ |
| PDIA2   | Protein disulfide isomerase family A, member 2                              |   |
| PDIK1L  | PDLIM1 interacting kinase 1 like                                            |   |
| PDK2    | Pyruvate dehydrogenase kinase, isozyme 2                                    |   |
| PDLIM7  | PDZ and LIM domain 7 (enigma)                                               |   |
| PDPN    | Podoplanin                                                                  |   |
| PDS5A   | PDS5, regulator of cohesion maintenance, homolog A ( <i>S. Cerevisiae</i> ) |   |
| PDSS1   | Prenyl (decaprenyl) diphosphate synthase, subunit 1                         |   |
| PDXK    | Pyridoxal (pyridoxine, vitamin B6) kinase                                   |   |
| PEF1    | Penta-EF-hand domain containing 1                                           |   |
| PEPD    | Peptidase D                                                                 |   |
| PES1    | Pescadillo homolog 1, containing BRCT domain (zebrafish)                    |   |
| PEX5L   | Peroxisomal biogenesis factor 5-like                                        |   |
| PFKP    | Phosphofructokinase, platelet                                               |   |
| PGK1    | Phosphoglycerate kinase 1                                                   |   |
| PGM2L1  | Phosphoglucomutase 2-like 1                                                 |   |
| PGPEP1  | Pyroglutamyl-peptidase I                                                    |   |
| PGR     | Progesterone receptor                                                       |   |
| PHACTR4 | Phosphatase and actin regulator 4                                           |   |
| PHC2    | Polyhomeotic homolog 2 ( <i>Drosophila</i> )                                |   |
| PHF15   | PHD finger protein 15                                                       |   |
| PHF16   | PHD finger protein 16                                                       |   |
| PHF2    | PHD finger protein 2                                                        |   |
| PHLDA1  | Pleckstrin homology-like domain, family A, member 1                         |   |
| PICK1   | Protein interacting with PRKCA 1                                            |   |
| PIGV    | Phosphatidylinositol glycan anchor biosynthesis, class V                    |   |
| PIGX    | Phosphatidylinositol glycan anchor biosynthesis, class X                    |   |
| PIK3C2B | Phosphoinositide-3-kinase, class 2, beta polypeptide                        |   |
| PIK3IP1 | Phosphoinositide-3-kinase interacting protein 1                             |   |
| PIKFYVE | Phosphoinositide kinase, FYVE finger containing                             |   |

|          |                                                                                              |  |
|----------|----------------------------------------------------------------------------------------------|--|
| PIPOX    | Pipecolic acid oxidase                                                                       |  |
| PITPNM3  | PITPNM family member 3                                                                       |  |
| PIWIL3   | Piwi-like 3 (Drosophila)                                                                     |  |
| PIWIL4   | Piwi-like 4 (Drosophila)                                                                     |  |
| PKD1     | Polycystic kidney disease 1 (autosomal dominant)                                             |  |
| PKD1L1   | Polycystic kidney disease 1 like 1                                                           |  |
| PKD2     | Polycystic kidney disease 2 (autosomal dominant)                                             |  |
| PKHD1    | Polycystic kidney and hepatic disease 1 (autosomal recessive)                                |  |
| PKHD1L1  | Polycystic kidney and hepatic disease 1 (autosomal recessive)-like 1                         |  |
| PLA2G12B | Phospholipase A2, group XIIB                                                                 |  |
| PLA2G6   | Phospholipase A2, group VI (cytosolic, calcium-independent)                                  |  |
| PLA2R1   | Phospholipase A2 receptor 1, 180kda                                                          |  |
| PLB1     | Phospholipase B1                                                                             |  |
| PLBD2    | Phospholipase B domain containing 2                                                          |  |
| PLCE1    | Phospholipase C, epsilon 1                                                                   |  |
| PLCXD3   | Phosphatidylinositol-specific phospholipase C, X domain containing 3                         |  |
| PLEC     | Plectin                                                                                      |  |
| PLEKHA4  | Pleckstrin homology domain containing, family A (phosphoinositide binding specific) member 4 |  |
| PLEKHH1  | Pleckstrin homology domain containing, family H (with myth4 domain) member 1                 |  |
| PLEKHJ1  | Pleckstrin homology domain containing, family J member 1                                     |  |
| PLEKHM1  | Pleckstrin homology domain containing, family M (with RUN domain) member 1                   |  |
| PLEKHM2  | Pleckstrin homology domain containing, family M (with RUN domain) member 2                   |  |
| PLEKHO2  | Pleckstrin homology domain containing, family O member 2                                     |  |
| PLIN1    | Perilipin 1                                                                                  |  |
| PLIN2    | Perilipin 2                                                                                  |  |
| PLK1     | Polo-like kinase 1                                                                           |  |
| PLXNA2   | Plexin A2                                                                                    |  |
| PLXNA3   | Plexin A3                                                                                    |  |
| PLXNA4   | Plexin A4                                                                                    |  |
| PLXNB1   | Plexin B1                                                                                    |  |
| PMEPA1   | Prostate transmembrane protein, androgen induced 1                                           |  |
| PNOC     | Prepronociceptin                                                                             |  |
| PNPLA6   | Patatin-like phospholipase domain containing 6                                               |  |
| PNPLA7   | Patatin-like phospholipase domain containing 7                                               |  |
| PNRC2    | Proline-rich nuclear receptor coactivator 2                                                  |  |
| PODN     | Podocan                                                                                      |  |

|          |                                                                                                           |   |
|----------|-----------------------------------------------------------------------------------------------------------|---|
| POLE3    | Polymerase (DNA directed), epsilon 3 (p17 subunit)                                                        |   |
| POLK     | Polymerase (DNA directed) kappa                                                                           |   |
| POLR1A   | Polymerase (RNA) I polypeptide A, 194 kDa                                                                 |   |
| POLR2A   | Polymerase (RNA) II (DNA directed) polypeptide A, 220 kDa                                                 |   |
| POLR2D   | Polymerase (RNA) II (DNA directed) polypeptide D                                                          |   |
| POLR3A   | Polymerase (RNA) III (DNA directed) polypeptide A, 155 kDa                                                |   |
| POLR3H   | Polymerase (RNA) III (DNA directed) polypeptide H (22.9 kDa)                                              |   |
| POLRMT   | Polymerase (RNA) mitochondrial (DNA directed)                                                             |   |
| POMGNT1  | Protein O-linked mannose beta1,2- <i>N</i> -acetylglucosaminyltransferase                                 |   |
| POSTN    | Periostin, osteoblast specific factor                                                                     |   |
| POT1     | Protection of telomeres 1 homolog ( <i>S. Pombe</i> )                                                     | √ |
| POU2AF1  | POU class 2 associating factor 1                                                                          | √ |
| POU2F1   | POU class 2 homeobox 1                                                                                    |   |
| POU3F3   | POU class 3 homeobox 3                                                                                    |   |
| PPAN     | Peter pan homolog ( <i>Drosophila</i> )                                                                   |   |
| PPARA    | Peroxisome proliferator-activated receptor alpha                                                          |   |
| PPFIA1   | Protein tyrosine phosphatase, receptor type, f polypeptide (PTPRF), interacting protein (liprin), alpha 1 |   |
| PPFIBP1  | PTPRF interacting protein, binding protein 1 (liprin beta 1)                                              |   |
| PPIAL4A  | Peptidylprolyl isomerase A (cyclophilin A)-like 4A                                                        |   |
| PPL      | Periplakin                                                                                                |   |
| PPM1A    | Protein phosphatase, Mg <sup>2+</sup> /Mn <sup>2+</sup> dependent, 1A                                     |   |
| PPM1B    | Protein phosphatase, Mg <sup>2+</sup> /Mn <sup>2+</sup> dependent, 1B                                     |   |
| PPM1D    | Protein phosphatase, Mg <sup>2+</sup> /Mn <sup>2+</sup> dependent, 1D                                     |   |
| PPM1F    | Protein phosphatase, Mg <sup>2+</sup> /Mn <sup>2+</sup> dependent, 1F                                     |   |
| PPM1M    | Protein phosphatase, Mg <sup>2+</sup> /Mn <sup>2+</sup> dependent, 1M                                     |   |
| PPP1R10  | Protein phosphatase 1, regulatory subunit 10                                                              |   |
| PPP1R12B | Protein phosphatase 1, regulatory subunit 12B                                                             |   |
| PPP1R35  | Protein phosphatase 1, regulatory subunit 35                                                              |   |
| PPP1R3F  | Protein phosphatase 1, regulatory subunit 3F                                                              |   |
| PPP2CA   | Protein phosphatase 2, catalytic subunit, alpha isozyme                                                   |   |
| PPP2R5D  | Protein phosphatase 2, regulatory subunit B', delta                                                       |   |
| PPP2R5E  | Protein phosphatase 2, regulatory subunit B', epsilon isoform                                             |   |
| PPP3R2   | Protein phosphatase 3, regulatory subunit B, beta                                                         |   |
| PPP6R1   | Protein phosphatase 6, regulatory subunit 1                                                               |   |
| PPRC1    | Peroxisome proliferator-activated receptor gamma, coactivator-related 1                                   |   |
| PRDM11   | PR domain containing 11                                                                                   |   |

|         |                                                                        |  |
|---------|------------------------------------------------------------------------|--|
| PRDM14  | PR domain containing 14                                                |  |
| PRDM15  | PR domain containing 15                                                |  |
| PRDM2   | PR domain containing 2, with ZNF domain                                |  |
| PRDM4   | PR domain containing 4                                                 |  |
| PRG4    | Proteoglycan 4                                                         |  |
| PRKCI   | Protein kinase C, iota                                                 |  |
| PRKD3   | Protein kinase D3                                                      |  |
| PRKDC   | Protein kinase, DNA-activated, catalytic polypeptide                   |  |
| PRKX    | Protein kinase, X-linked                                               |  |
| PRNP    | Prion protein                                                          |  |
| PRPF4   | PRP4 pre-mrna processing factor 4 homolog (yeast)                      |  |
| PRPF40B | PRP40 pre-mrna processing factor 40 homolog B ( <i>S. Cerevisiae</i> ) |  |
| PRPS2   | Phosphoribosyl pyrophosphate synthetase 2                              |  |
| PRR14L  | Proline rich 14-like                                                   |  |
| PRR18   | Proline rich 18                                                        |  |
| PRR5    | Proline rich 5 (renal)                                                 |  |
| PRRC1   | Proline-rich coiled-coil 1                                             |  |
| PRRC2A  | Proline-rich coiled-coil 2A                                            |  |
| PRRC2B  | Proline-rich coiled-coil 2B                                            |  |
| PRRC2C  | Proline-rich coiled-coil 2C                                            |  |
| PRRT1   | Proline-rich transmembrane protein 1                                   |  |
| PRRT2   | Proline-rich transmembrane protein 2                                   |  |
| PRSS27  | Protease, serine 27                                                    |  |
| PRSS45  | Protease, serine, 45                                                   |  |
| PRSS50  | Protease, serine, 50                                                   |  |
| PSAPL1  | Prosaposin-like 1 (gene/pseudogene)                                    |  |
| PSD4    | Pleckstrin and Sec7 domain containing 4                                |  |
| PSKH1   | Protein serine kinase H1                                               |  |
| PSMB2   | Proteasome (prosome, macropain) subunit, beta type, 2                  |  |
| PSMD13  | Proteasome (prosome, macropain) 26S subunit, non-atpase, 13            |  |
| PSMD14  | Proteasome (prosome, macropain) 26S subunit, non-atpase, 14            |  |
| PSMD4   | Proteasome (prosome, macropain) 26S subunit, non-atpase, 4             |  |
| PSMD5   | Proteasome (prosome, macropain) 26S subunit, non-atpase, 5             |  |
| PSMD7   | Proteasome (prosome, macropain) 26S subunit, non-atpase, 7             |  |
| PTAR1   | Protein prenyltransferase alpha subunit repeat containing 1            |  |
| PTCD1   | Pentatricopeptide repeat domain 1                                      |  |

|           |                                                                                              |  |
|-----------|----------------------------------------------------------------------------------------------|--|
| PTCH1     | Patched 1                                                                                    |  |
| PTER      | Phosphotriesterase related                                                                   |  |
| PTGFRN    | Prostaglandin F2 receptor negative regulator                                                 |  |
| PTH1R     | Parathyroid hormone 1 receptor                                                               |  |
| PTK6      | PTK6 protein tyrosine kinase 6                                                               |  |
| PTK7      | PTK7 protein tyrosine kinase 7                                                               |  |
| PTMA      | Prothymosin, alpha                                                                           |  |
| PTP4A2    | Protein tyrosine phosphatase type IVA, member 2                                              |  |
| PTPLAD1   | Protein tyrosine phosphatase-like A domain containing 1                                      |  |
| PTPN13    | Protein tyrosine phosphatase, non-receptor type 13 (APO-1/CD95 (Fas)-associated phosphatase) |  |
| PTPN18    | Protein tyrosine phosphatase, non-receptor type 18 (brain-derived)                           |  |
| PTPN21    | Protein tyrosine phosphatase, non-receptor type 21                                           |  |
| PTPN4     | Protein tyrosine phosphatase, non-receptor type 4 (megakaryocyte)                            |  |
| PTPN5     | Protein tyrosine phosphatase, non-receptor type 5 (striatum-enriched)                        |  |
| PTPN9     | Protein tyrosine phosphatase, non-receptor type 9                                            |  |
| PTPRD     | Protein tyrosine phosphatase, receptor type, D                                               |  |
| PTPRF     | Protein tyrosine phosphatase, receptor type, F                                               |  |
| PTPRG     | Protein tyrosine phosphatase, receptor type, G                                               |  |
| PTPRH     | Protein tyrosine phosphatase, receptor type, H                                               |  |
| PTPRN     | Protein tyrosine phosphatase, receptor type, N                                               |  |
| PTPRS     | Protein tyrosine phosphatase, receptor type, S                                               |  |
| PTPRT     | Protein tyrosine phosphatase, receptor type, T                                               |  |
| PTPRU     | Protein tyrosine phosphatase, receptor type, U                                               |  |
| PTRF      | Polymerase I and transcript release factor                                                   |  |
| PUM2      | Pumilio homolog 2 (Drosophila)                                                               |  |
| PVRL2     | Poliovirus receptor-related 2 (herpesvirus entry mediator B)                                 |  |
| PYCR2     | Pyrroline-5-carboxylate reductase family, member 2                                           |  |
| PYROXD1   | Pyridine nucleotide-disulphide oxidoreductase domain 1                                       |  |
| QPRT      | Quinolate phosphoribosyltransferase                                                          |  |
| QRFPR     | Pyroglutamylated rfamide peptide receptor                                                    |  |
| QRICH1    | Glutamine-rich 1                                                                             |  |
| R3HCC1    | R3H domain and coiled-coil containing 1                                                      |  |
| RAB11FIP4 | RAB11 family interacting protein 4 (class II)                                                |  |
| RAB27B    | RAB27B, member RAS oncogene family                                                           |  |
| RAB2B     | RAB2B, member RAS oncogene family                                                            |  |
| RAB35     | RAB35, member RAS oncogene family                                                            |  |

|          |                                                            |  |
|----------|------------------------------------------------------------|--|
| RAB37    | RAB37, member RAS oncogene family                          |  |
| RAB3B    | RAB3B, member RAS oncogene family                          |  |
| RAB3GAP2 | RAB3 gtpase activating protein subunit 2 (non-catalytic)   |  |
| RAB3IP   | RAB3A interacting protein (rabin3)                         |  |
| RAB4A    | RAB4A, member RAS oncogene family                          |  |
| RAB7L1   | RAB7, member RAS oncogene family-like 1                    |  |
| RABL2A   | RAB, member of RAS oncogene family-like 2A                 |  |
| RABL5    | RAB, member RAS oncogene family-like 5                     |  |
| RAD1     | RAD1 homolog ( <i>S. Pombe</i> )                           |  |
| RAD18    | RAD18 homolog ( <i>S. Cerevisiae</i> )                     |  |
| RAD50    | RAD50 homolog ( <i>S. Cerevisiae</i> )                     |  |
| RAD51    | RAD51 homolog ( <i>S. Cerevisiae</i> )                     |  |
| RAD54L2  | RAD54-like 2 ( <i>S. Cerevisiae</i> )                      |  |
| RAG2     | Recombination activating gene 2                            |  |
| RALGPS1  | Ral GEF with PH domain and SH3 binding motif 1             |  |
| RANBP10  | RAN binding protein 10                                     |  |
| RAP1GAP  | RAP1 gtpase activating protein                             |  |
| RAP2A    | RAP2A, member of RAS oncogene family                       |  |
| RARG     | Retinoic acid receptor, gamma                              |  |
| RASAL2   | RAS protein activator like 2                               |  |
| RASGEF1A | Rasgef domain family, member 1A                            |  |
| RASGRP2  | RAS guanyl releasing protein 2 (calcium and DAG-regulated) |  |
| RASGRP4  | RAS guanyl releasing protein 4                             |  |
| RASL10B  | RAS-like, family 10, member B                              |  |
| RASL11B  | RAS-like, family 11, member B                              |  |
| RBBP6    | Retinoblastoma binding protein 6                           |  |
| RBFA     | Ribosome binding factor A (putative)                       |  |
| RBFox2   | RNA binding protein, fox-1 homolog ( <i>C. Elegans</i> ) 2 |  |
| RBM27    | RNA binding motif protein 27                               |  |
| RBM33    | RNA binding motif protein 33                               |  |
| RBM38    | RNA binding motif protein 38                               |  |
| RBM39    | RNA binding motif protein 39                               |  |
| RBM43    | RNA binding motif protein 43                               |  |
| RCCD1    | RCC1 domain containing 1                                   |  |
| RCN1     | Reticulocalbin 1, EF-hand calcium binding domain           |  |
| RCOR2    | REST corepressor 2                                         |  |



|         |                                                                              |   |
|---------|------------------------------------------------------------------------------|---|
| RDX     | Radixin                                                                      |   |
| REEP1   | Receptor accessory protein 1                                                 |   |
| REG4    | Regenerating islet-derived family, member 4                                  |   |
| REL     | V-rel reticuloendotheliosis viral oncogene homolog (avian)                   | √ |
| RELL1   | RELT-like 1                                                                  |   |
| RELT    | RELT tumor necrosis factor receptor                                          |   |
| RERE    | Arginine-glutamic acid dipeptide (RE) repeats                                |   |
| RETSAT  | Retinol saturase (all-trans-retinol 13,14-reductase)                         |   |
| REV1    | REV1 homolog ( <i>S. Cerevisiae</i> )                                        |   |
| RFC2    | Replication factor C (activator 1) 2, 40kda                                  |   |
| RFFL    | Ring finger and FYVE-like domain containing 1                                |   |
| RFK     | Riboflavin kinase                                                            |   |
| RFPL2   | Ret finger protein-like 2                                                    |   |
| RFX1    | Regulatory factor X, 1 (influences HLA class II expression)                  |   |
| RFX3    | Regulatory factor X, 3 (influences HLA class II expression)                  |   |
| RGAG4   | Retrotransposon gag domain containing 4                                      |   |
| RGN     | Regucalcin (senescence marker protein-30)                                    |   |
| RGS11   | Regulator of G-protein signaling 11                                          |   |
| RGS14   | Regulator of G-protein signaling 14                                          |   |
| RGS7    | Regulator of G-protein signaling 7                                           |   |
| RHCE    | Rh blood group, ccee antigens                                                |   |
| RHEBL1  | Ras homolog enriched in brain like 1                                         |   |
| RHO     | Rhodopsin                                                                    |   |
| RHOD    | Ras homolog gene family, member D                                            |   |
| RHOH    | Ras homolog gene family, member H                                            |   |
| RIC8B   | Resistance to inhibitors of cholinesterase 8 homolog B ( <i>C. Elegans</i> ) |   |
| RILPL1  | Rab interacting lysosomal protein-like 1                                     |   |
| RILPL2  | Rab interacting lysosomal protein-like 2                                     |   |
| RIMS1   | Regulating synaptic membrane exocytosis 1                                    |   |
| RIOK3   | RIO kinase 3 (yeast)                                                         |   |
| RIPK4   | Receptor-interacting serine-threonine kinase 4                               |   |
| RNASET2 | Ribonuclease T2                                                              |   |
| RNF111  | Ring finger protein 111                                                      |   |
| RNF144B | Ring finger protein 144B                                                     |   |
| RNF145  | Ring finger protein 145                                                      |   |
| RNF152  | Ring finger protein 152                                                      |   |

|                |                                                            |   |
|----------------|------------------------------------------------------------|---|
| RNF168         | Ring finger protein 168                                    |   |
| RNF182         | Ring finger protein 182                                    |   |
| RNF19A         | Ring finger protein 19A                                    |   |
| RNF213         | Ring finger protein 213                                    |   |
| RNF214         | Ring finger protein 214                                    |   |
| <b>RNF43</b>   | <b>Ring finger protein 43</b>                              | √ |
| RNFT2          | Ring finger protein, transmembrane 2                       |   |
| RNMTL1         | RNA methyltransferase like 1                               |   |
| RNPEP          | Arginyl aminopeptidase (aminopeptidase B)                  |   |
| ROBO1          | Roundabout, axon guidance receptor, homolog 1 (Drosophila) |   |
| ROBO2          | Roundabout, axon guidance receptor, homolog 2 (Drosophila) |   |
| ROBO4          | Roundabout homolog 4, magic roundabout (Drosophila)        |   |
| ROCK1          | Rho-associated, coiled-coil containing protein kinase 1    |   |
| ROPN1          | Rhopilin associated tail protein 1                         |   |
| ROPN1B         | Rhopilin associated tail protein 1B                        |   |
| ROR2           | Receptor tyrosine kinase-like orphan receptor 2            |   |
| RORA           | RAR-related orphan receptor A                              |   |
| RP11-111M22.2  | Uncharacterized protein                                    |   |
| RP11-1280I22.1 | Plasma cell-induced resident endoplasmic reticulum protein |   |
| RP11-          | Nuclear pore complex-interacting protein-like 2            |   |
| RP11-152F13.5  | Golgin subfamily A member 6-like protein 9                 |   |
| RP11-326A13.2  |                                                            |   |
| RP11-330H6.5   | TLR9                                                       |   |
| RP11-35N6.1    | Lipid phosphate phosphatase-related protein type 1         |   |
| RP11-57A19.3   | Uncharacterized protein                                    |   |
| RP11-73M18.2   | UPF0671 protein c14orf153                                  |   |
| RP3-368B9.1    | Uncharacterized protein                                    |   |
| RP4-604K5.1    | 15 kda selenoprotein                                       |   |
| RP4-788L13.1   | Lipid phosphate phosphatase-related protein type 4         |   |
| RP5-           | Prosap-interacting protein 1                               |   |
| RPH3A          | Rabphilin 3A homolog (mouse)                               |   |
| RPH3AL         | Rabphilin 3A-like (without C2 domains)                     |   |
| RPIA           | Ribose 5-phosphate isomerase A                             |   |
| <b>RPL10</b>   | <b>Ribosomal protein L10</b>                               | √ |
| RPL23          | Ribosomal protein L23                                      |   |
| RPL24          | Ribosomal protein L24                                      |   |

|          |                                                                |   |
|----------|----------------------------------------------------------------|---|
| RPL28    | Ribosomal protein L28                                          |   |
| RPRD2    | Regulation of nuclear pre-mrna domain containing 2             |   |
| RPS14    | Ribosomal protein S14                                          |   |
| RPS19BP1 | Ribosomal protein S19 binding protein 1                        |   |
| RPS2     | Ribosomal protein S2                                           |   |
| RPS3     | Ribosomal protein S3                                           |   |
| RPS5     | Ribosomal protein S5                                           |   |
| RPS6     | Ribosomal protein S6                                           |   |
| RPS6KA1  | Ribosomal protein S6 kinase, 90kda, polypeptide 1              |   |
| RPS6KL1  | Ribosomal protein S6 kinase-like 1                             |   |
| RPS9     | Ribosomal protein S9                                           |   |
| RPTOR    | Regulatory associated protein of MTOR, complex 1               |   |
| RPUSD4   | RNA pseudouridylate synthase domain containing 4               |   |
| RRP12    | Ribosomal RNA processing 12 homolog ( <i>S. Cerevisiae</i> )   |   |
| RRP1B    | Ribosomal RNA processing 1 homolog B ( <i>S. Cerevisiae</i> )  |   |
| RRP7A    | Ribosomal RNA processing 7 homolog A ( <i>S. Cerevisiae</i> )  |   |
| RRP8     | Ribosomal RNA processing 8, methyltransferase, homolog (yeast) |   |
| RSAD1    | Radical S-adenosyl methionine domain containing 1              |   |
| RSPH10B2 | Radial spoke head 10 homolog B2 ( <i>Chlamydomonas</i> )       |   |
| RSPH9    | Radial spoke head 9 homolog ( <i>Chlamydomonas</i> )           |   |
| RSPO1    | R-spondin 1                                                    |   |
| RSRC2    | Arginine/serine-rich coiled-coil 2                             |   |
| RTN2     | Reticulon 2                                                    |   |
| RUNDC2A  | RUN domain-containing protein 2A                               | √ |
| RUNX1    | Runt-related transcription factor 1                            | √ |
| RUSC2    | RUN and SH3 domain containing 2                                |   |
| RXFP4    | Relaxin/insulin-like family peptide receptor 4                 |   |
| RYR1     | Ryanodine receptor 1 (skeletal)                                |   |
| S100A3   | S100 calcium binding protein A3                                |   |
| S100P    | S100 calcium binding protein P                                 |   |
| S100PBP  | S100P binding protein                                          |   |
| SACS     | Spastic ataxia of Charlevoix-Saguenay (sacsin)                 |   |
| SAG      | S-antigen; retina and pineal gland (arrestin)                  |   |
| SAMD13   | Sterile alpha motif domain containing 13                       |   |
| SAMD14   | Sterile alpha motif domain containing 14                       |   |
| SAMD5    | Sterile alpha motif domain containing 5                        |   |

|         |                                                                                                         |  |
|---------|---------------------------------------------------------------------------------------------------------|--|
| SAMD9L  | Sterile alpha motif domain containing 9-like                                                            |  |
| SARDH   | Sarcosine dehydrogenase                                                                                 |  |
| SART1   | Squamous cell carcinoma antigen recognized by T cells                                                   |  |
| SASH1   | SAM and SH3 domain containing 1                                                                         |  |
| SATB1   | SATB homeobox 1                                                                                         |  |
| SATB2   | SATB homeobox 2                                                                                         |  |
| SBF2    | SET binding factor 2                                                                                    |  |
| SBNO2   | Strawberry notch homolog 2 (Drosophila)                                                                 |  |
| SCAF11  | SR-related CTD-associated factor 11                                                                     |  |
| SCARA5  | Scavenger receptor class A, member 5 (putative)                                                         |  |
| SCFD2   | Sec1 family domain containing 2                                                                         |  |
| SCN3A   | Sodium channel, voltage-gated, type III, alpha subunit                                                  |  |
| SCN4A   | Sodium channel, voltage-gated, type IV, alpha subunit                                                   |  |
| SCN8A   | Sodium channel, voltage gated, type VIII, alpha subunit                                                 |  |
| SCNN1D  | Sodium channel, nonvoltage-gated 1, delta                                                               |  |
| SCRIB   | Scribbled homolog (Drosophila)                                                                          |  |
| SCUBE1  | Signal peptide, CUB domain, EGF-like 1                                                                  |  |
| SCUBE2  | Signal peptide, CUB domain, EGF-like 2                                                                  |  |
| SDC3    | Syndecan 3                                                                                              |  |
| SDF4    | Stromal cell derived factor 4                                                                           |  |
| SDK2    | Sidekick homolog 2 (chicken)                                                                            |  |
| SDPR    | Serum deprivation response                                                                              |  |
| SDR42E1 | Short chain dehydrogenase/reductase family 42E, member 1                                                |  |
| SDR9C7  | Short chain dehydrogenase/reductase family 9C, member 7                                                 |  |
| SEC16A  | SEC16 homolog A ( <i>S. Cerevisiae</i> )                                                                |  |
| SEC23A  | Sec23 homolog A ( <i>S. Cerevisiae</i> )                                                                |  |
| SEC63   | SEC63 homolog ( <i>S. Cerevisiae</i> )                                                                  |  |
| SEMA4C  | Sema domain, immunoglobulin domain (Ig), transmembrane domain (TM) and short cytoplasmic domain,        |  |
| SEMA5A  | Sema domain, seven thrombospondin repeats (type 1 and type 1-like), transmembrane domain (TM) and short |  |
| SEMA6B  | Sema domain, transmembrane domain (TM), and cytoplasmic domain, (semaphorin) 6B                         |  |
| SEMA6D  | Sema domain, transmembrane domain (TM), and cytoplasmic domain, (semaphorin) 6D                         |  |
| SEPT5   | Septin 5                                                                                                |  |
| SEPT7   | Septin 7                                                                                                |  |
| SEPT9   | Septin 9                                                                                                |  |
| SERHL2  | Serine hydrolase-like 2                                                                                 |  |
| SERINC3 | Serine incorporator 3                                                                                   |  |

|          |                                                                                                     |   |
|----------|-----------------------------------------------------------------------------------------------------|---|
| SERPINB6 | Serpin peptidase inhibitor, clade B (ovalbumin), member 6                                           |   |
| SERPINH1 | Serpin peptidase inhibitor, clade H (heat shock protein 47), member 1, (collagen binding protein 1) |   |
| SESN1    | Sestrin 1                                                                                           |   |
| SETBP1   | SET binding protein 1                                                                               | √ |
| SETD1B   | SET domain containing 1B                                                                            |   |
| SETD6    | SET domain containing 6                                                                             |   |
| SEZ6L    | Seizure related 6 homolog (mouse)-like                                                              |   |
| SF1      | Splicing factor 1                                                                                   |   |
| SF3B1    | Splicing factor 3b, subunit 1, 155kda                                                               | √ |
| SFTPA2   | Surfactant protein A2                                                                               |   |
| SFTPD    | Surfactant protein D                                                                                |   |
| SFXN3    | Sideroflexin 3                                                                                      |   |
| SGCD     | Sarcoglycan, delta (35kda dystrophin-associated glycoprotein)                                       |   |
| SH2D3C   | SH2 domain containing 3C                                                                            |   |
| SH3BP2   | SH3-domain binding protein 2                                                                        |   |
| SH3BP4   | SH3-domain binding protein 4                                                                        |   |
| SH3GL3   | SH3-domain GRB2-like 3                                                                              |   |
| SH3KBP1  | SH3-domain kinase binding protein 1                                                                 |   |
| SH3PXD2A | SH3 and PX domains 2A                                                                               |   |
| SH3PXD2B | SH3 and PX domains 2B                                                                               |   |
| SH3RF1   | SH3 domain containing ring finger 1                                                                 |   |
| SHANK1   | SH3 and multiple ankyrin repeat domains 1                                                           |   |
| SHANK2   | SH3 and multiple ankyrin repeat domains 2                                                           |   |
| SHC1     | SHC (Src homology 2 domain containing) transforming protein 1                                       |   |
| SHMT1    | Serine hydroxymethyltransferase 1 (soluble)                                                         |   |
| SHOX2    | Short stature homeobox 2                                                                            |   |
| SHQ1     | SHQ1 homolog (S. Cerevisiae)                                                                        |   |
| SHROOM2  | Shroom family member 2                                                                              |   |
| SHROOM3  | Shroom family member 3                                                                              |   |
| SHROOM4  | Shroom family member 4                                                                              |   |
| SIDT1    | SID1 transmembrane family, member 1                                                                 |   |
| SIDT2    | SID1 transmembrane family, member 2                                                                 |   |
| SIGLEC1  | Sialic acid binding Ig-like lectin 1, sialoadhesin                                                  |   |
| SIK2     | Salt-inducible kinase 2                                                                             |   |
| SIPA1L1  | Signal-induced proliferation-associated 1 like 1                                                    |   |
| SIPA1L2  | Signal-induced proliferation-associated 1 like 2                                                    |   |

|          |                                                                                                  |  |
|----------|--------------------------------------------------------------------------------------------------|--|
| SIPA1L3  | Signal-induced proliferation-associated 1 like 3                                                 |  |
| SIRPB1   | Signal-regulatory protein beta 1                                                                 |  |
| SIRT1    | Sirtuin 1                                                                                        |  |
| SLC12A1  | Solute carrier family 12 (sodium/potassium/chloride transporters), member 1                      |  |
| SLC12A2  | Solute carrier family 12 (sodium/potassium/chloride transporters), member 2                      |  |
| SLC12A9  | Solute carrier family 12 (potassium/chloride transporters), member 9                             |  |
| SLC16A2  | Solute carrier family 16, member 2 (monocarboxylic acid transporter 8)                           |  |
| SLC16A3  | Solute carrier family 16, member 3 (monocarboxylic acid transporter 4)                           |  |
| SLC16A7  | Solute carrier family 16, member 7 (monocarboxylic acid transporter 2)                           |  |
| SLC17A4  | Solute carrier family 17 (sodium phosphate), member 4                                            |  |
| SLC17A5  | Solute carrier family 17 (anion/sugar transporter), member 5                                     |  |
| SLC18A2  | Solute carrier family 18 (vesicular monoamine), member 2                                         |  |
| SLC1A2   | Solute carrier family 1 (glial high affinity glutamate transporter), member 2                    |  |
| SLC1A6   | Solute carrier family 1 (high affinity aspartate/glutamate transporter), member 6                |  |
| SLC20A2  | Solute carrier family 20 (phosphate transporter), member 2                                       |  |
| SLC22A23 | Solute carrier family 22, member 23                                                              |  |
| SLC23A2  | Solute carrier family 23 (nucleobase transporters), member 2                                     |  |
| SLC24A3  | Solute carrier family 24 (sodium/potassium/calcium exchanger), member 3                          |  |
| SLC25A12 | Solute carrier family 25 (mitochondrial carrier, Aralar), member 12                              |  |
| SLC25A14 | Solute carrier family 25 (mitochondrial carrier, brain), member 14                               |  |
| SLC25A17 | Solute carrier family 25 (mitochondrial carrier; peroxisomal membrane protein, 34kda), member 17 |  |
| SLC25A24 | Solute carrier family 25 (mitochondrial carrier; phosphate carrier), member 24                   |  |
| SLC25A42 | Solute carrier family 25, member 42                                                              |  |
| SLC25A44 | Solute carrier family 25, member 44                                                              |  |
| SLC25A45 | Solute carrier family 25, member 45                                                              |  |
| SLC2A13  | Solute carrier family 2 (facilitated glucose transporter), member 13                             |  |
| SLC2A6   | Solute carrier family 2 (facilitated glucose transporter), member 6                              |  |
| SLC2A7   | Solute carrier family 2 (facilitated glucose transporter), member 7                              |  |
| SLC30A4  | Solute carrier family 30 (zinc transporter), member 4                                            |  |
| SLC35A1  | Solute carrier family 35 (CMP-sialic acid transporter), member A1                                |  |
| SLC35A2  | Solute carrier family 35 (UDP-galactose transporter), member A2                                  |  |
| SLC35A3  | Solute carrier family 35 (UDP-N-acetylglucosamine (UDP-glcnaC) transporter), member A3           |  |
| SLC35A4  | Solute carrier family 35, member A4                                                              |  |
| SLC35B1  | Solute carrier family 35, member B1                                                              |  |
| SLC35B4  | Solute carrier family 35, member B4                                                              |  |
| SLC35C1  | Solute carrier family 35, member C1                                                              |  |

|          |                                                                                                   |   |
|----------|---------------------------------------------------------------------------------------------------|---|
| SLC35F4  | Solute carrier family 35, member F4                                                               |   |
| SLC36A3  | Solute carrier family 36 (proton/amino acid symporter), member 3                                  |   |
| SLC39A13 | Solute carrier family 39 (zinc transporter), member 13                                            |   |
| SLC39A7  | Solute carrier family 39 (zinc transporter), member 7                                             |   |
| SLC39A8  | Solute carrier family 39 (zinc transporter), member 8                                             |   |
| SLC41A1  | Solute carrier family 41, member 1                                                                |   |
| SLC43A3  | Solute carrier family 43, member 3                                                                |   |
| SLC46A1  | Solute carrier family 46 (folate transporter), member 1                                           |   |
| SLC4A4   | Solute carrier family 4, sodium bicarbonate cotransporter, member 4                               |   |
| SLC4A5   | Solute carrier family 4, sodium bicarbonate cotransporter, member 5                               |   |
| SLC4A9   | Solute carrier family 4, sodium bicarbonate cotransporter, member 9                               |   |
| SLC5A11  | Solute carrier family 5 (sodium/glucose cotransporter), member 11                                 |   |
| SLC5A7   | Solute carrier family 5 (choline transporter), member 7                                           |   |
| SLC6A12  | Solute carrier family 6 (neurotransmitter transporter, betaine/GABA), member 12                   |   |
| SLC6A13  | Solute carrier family 6 (neurotransmitter transporter, GABA), member 13                           |   |
| SLC6A19  | Solute carrier family 6 (neutral amino acid transporter), member 19                               |   |
| SLC6A20  | Solute carrier family 6 (proline IMINO transporter), member 20                                    |   |
| SLC6A3   | Solute carrier family 6 (neurotransmitter transporter, dopamine), member 3                        |   |
| SLC7A11  | Solute carrier family 7 (anionic amino acid transporter light chain, xc- system), member 11       |   |
| SLC7A14  | Solute carrier family 7 (orphan transporter), member 14                                           |   |
| SLC7A6   | Solute carrier family 7 (amino acid transporter light chain, y+L system), member 6                |   |
| SLC7A8   | Solute carrier family 7 (amino acid transporter light chain, L system), member 8                  |   |
| SLC9A1   | Solute carrier family 9 (sodium/hydrogen exchanger), member 1                                     |   |
| SLC9A3R1 | Solute carrier family 9 (sodium/hydrogen exchanger), member 3 regulator 1                         |   |
| SLCO1C1  | Solute carrier organic anion transporter family, member 1C1                                       |   |
| SLCO2B1  | Solute carrier organic anion transporter family, member 2B1                                       |   |
| SLCO4A1  | Solute carrier organic anion transporter family, member 4A1                                       |   |
| SLFN14   | Schlafen family member 14                                                                         |   |
| SMAD2    | SMAD family member 2                                                                              |   |
| SMARCA4  | SWI/SNF related, matrix associated, actin dependent regulator of chromatin, subfamily a, member 4 | √ |
| SMC1A    | Structural maintenance of chromosomes 1A                                                          |   |
| SMC3     | Structural maintenance of chromosomes 3                                                           |   |
| SMCHD1   | Structural maintenance of chromosomes flexible hinge domain containing 1                          |   |
| SMCR8    | Smith-Magenis syndrome chromosome region, candidate 8                                             |   |
| SMG7     | Smg-7 homolog, nonsense mediated mrna decay factor ( <i>C. Elegans</i> )                          |   |
| SMG9     | Smg-9 homolog, nonsense mediated mrna decay factor ( <i>C. Elegans</i> )                          |   |

|          |                                                                                   |  |
|----------|-----------------------------------------------------------------------------------|--|
| SMPD3    | Sphingomyelin phosphodiesterase 3, neutral membrane (neutral sphingomyelinase II) |  |
| SMTNL2   | Smoothelin-like 2                                                                 |  |
| SMURF1   | SMAD specific E3 ubiquitin protein ligase 1                                       |  |
| SNAP29   | Synaptosomal-associated protein, 29 kDa                                           |  |
| SNAP47   | Synaptosomal-associated protein, 47 kDa                                           |  |
| SNAP91   | Synaptosomal-associated protein, 91 kDa homolog (mouse)                           |  |
| SNRNP200 | Small nuclear ribonucleoprotein 200 kDa (U5)                                      |  |
| SNRNP70  | Small nuclear ribonucleoprotein 70 kDa (U1)                                       |  |
| SNRPG    | Small nuclear ribonucleoprotein polypeptide G                                     |  |
| SNTB2    | Syntrophin, beta 2 (dystrophin-associated protein A1, 59 kDa, basic component 2)  |  |
| SNUPN    | Snurportin 1                                                                      |  |
| SNX15    | Sorting nexin 15                                                                  |  |
| SNX22    | Sorting nexin 22                                                                  |  |
| SNX32    | Sorting nexin 32                                                                  |  |
| SOCS2    | Suppressor of cytokine signaling 2                                                |  |
| SOCS6    | Suppressor of cytokine signaling 6                                                |  |
| SOX8     | SRY (sex determining region Y)-box 8                                              |  |
| SP1      | Sp1 transcription factor                                                          |  |
| SP2      | Sp2 transcription factor                                                          |  |
| SP4      | Sp4 transcription factor                                                          |  |
| SPACA3   | Sperm acrosome associated 3                                                       |  |
| SPAG1    | Sperm associated antigen 1                                                        |  |
| SPAG6    | Sperm associated antigen 6                                                        |  |
| SPAG9    | Sperm associated antigen 9                                                        |  |
| SPATA13  | Spermatogenesis associated 13                                                     |  |
| SPATS2L  | Spermatogenesis associated, serine-rich 2-like                                    |  |
| SPCS2    | Signal peptidase complex subunit 2 homolog ( <i>S. Cerevisiae</i> )               |  |
| SPDYE3   | Speedy homolog E3 ( <i>Xenopus laevis</i> )                                       |  |
| SPECC1   | Sperm antigen with calponin homology and coiled-coil domains 1                    |  |
| SPG20    | Spastic paraplegia 20 (Troyer syndrome)                                           |  |
| SPIN2A   | Spindlin family, member 2A                                                        |  |
| SPIN2B   | Spindlin family, member 2B                                                        |  |
| SPOCD1   | SPOC domain containing 1                                                          |  |
| SPOCK2   | Sparc/osteonectin, cwcv and kazal-like domains proteoglycan (testican) 2          |  |
| SPRED1   | Sprouty-related, EVH1 domain containing 1                                         |  |
| SPRY3    | Sprouty homolog 3 ( <i>Drosophila</i> )                                           |  |



|            |                                                                                                               |   |
|------------|---------------------------------------------------------------------------------------------------------------|---|
| SPRYD7     | SPRY domain containing 7                                                                                      |   |
| SPTLC1     | Serine palmitoyltransferase, long chain base subunit 1                                                        |   |
| SRC        | V-src sarcoma (Schmidt-Ruppin A-2) viral oncogene homolog (avian)                                             |   |
| SRCAP      | Snf2-related CREBBP activator protein                                                                         |   |
| SRCRB4D    | Scavenger receptor cysteine rich domain containing, group B (4 domains)                                       |   |
| SREK1      | Splicing regulatory glutamine/lysine-rich protein 1                                                           |   |
| SRF        | Serum response factor (c-fos serum response element-binding transcription factor)                             |   |
| SRGAP2     | SLIT-ROBO Rho gtpase activating protein 2                                                                     |   |
| SRL        | Sarcalumenin                                                                                                  |   |
| SRM        | Spermidine synthase                                                                                           |   |
| SSTR2      | Somatostatin receptor 2                                                                                       |   |
| ST3GAL2    | ST3 beta-galactoside alpha-2,3-sialyltransferase 2                                                            |   |
| ST3GAL4    | ST3 beta-galactoside alpha-2,3-sialyltransferase 4                                                            |   |
| ST6GALNAC2 | ST6 (alpha-N-acetyl-neuraminyl-2,3-beta-galactosyl-1,3)-N-acetylgalactosaminide alpha-2,6-sialyltransferase 2 |   |
| ST6GALNAC6 | ST6 (alpha-N-acetyl-neuraminyl-2,3-beta-galactosyl-1,3)-N-acetylgalactosaminide alpha-2,6-sialyltransferase 6 |   |
| ST8SIA2    | ST8 alpha-N-acetyl-neuraminide alpha-2,8-sialyltransferase 2                                                  |   |
| ST8SIA4    | ST8 alpha-N-acetyl-neuraminide alpha-2,8-sialyltransferase 4                                                  |   |
| STAB1      | Stabilin 1                                                                                                    |   |
| STAG3L2    | Stromal antigen 3-like 2                                                                                      |   |
| STAG3L3    | Stromal antigen 3-like 3                                                                                      |   |
| STAR       | Steroidogenic acute regulatory protein                                                                        |   |
| STARD13    | Star-related lipid transfer (START) domain containing 13                                                      |   |
| STARD4     | Star-related lipid transfer (START) domain containing 4                                                       |   |
| STARD9     | Star-related lipid transfer (START) domain containing 9                                                       |   |
| STAT3      | Signal transducer and activator of transcription 3 (acute-phase response factor)                              | √ |
| STK35      | Serine/threonine kinase 35                                                                                    |   |
| STMN1      | Stathmin 1                                                                                                    |   |
| STMN3      | Stathmin-like 3                                                                                               |   |
| STON1      | Stonin 1                                                                                                      |   |
| STON2      | Stonin 2                                                                                                      |   |
| STRC       | Stereocilin                                                                                                   |   |
| STRN       | Striatin, calmodulin binding protein                                                                          |   |
| STX7       | Syntaxin 7                                                                                                    |   |
| STYK1      | Serine/threonine/tyrosine kinase 1                                                                            |   |
| SUB1       | SUB1 homolog (S. Cerevisiae)                                                                                  |   |
| SUFU       | Suppressor of fused homolog (Drosophila)                                                                      | √ |

|          |                                                                                                      |   |
|----------|------------------------------------------------------------------------------------------------------|---|
| SUGP2    | SURP and G patch domain containing 2                                                                 |   |
| SUN2     | Sad1 and UNC84 domain containing 2                                                                   |   |
| SUOX     | Sulfite oxidase                                                                                      |   |
| SUPT6H   | Suppressor of Ty 6 homolog ( <i>S. Cerevisiae</i> )                                                  |   |
| SURF6    | Surfeit 6                                                                                            |   |
| SUV39H1  | Suppressor of variegation 3-9 homolog 1 ( <i>Drosophila</i> )                                        |   |
| SV2B     | Synaptic vesicle glycoprotein 2B                                                                     |   |
| SV2C     | Synaptic vesicle glycoprotein 2C                                                                     |   |
| SVEP1    | Sushi, von Willebrand factor type A, EGF and pentraxin domain containing 1                           |   |
| SVIL     | Supervillin                                                                                          |   |
| SYCE2    | Synaptonemal complex central element protein 2                                                       |   |
| SYCE3    | Synaptonemal complex central element protein 3                                                       |   |
| SYMPK    | Symplekin                                                                                            |   |
| SYNCRIP  | Synaptotagmin binding, cytoplasmic RNA interacting protein                                           |   |
| SYNE1    | Spectrin repeat containing, nuclear envelope 1                                                       |   |
| SYNE2    | Spectrin repeat containing, nuclear envelope 2                                                       |   |
| SYNPO    | Synaptopodin                                                                                         |   |
| SYNPO2   | Synaptopodin 2                                                                                       |   |
| SYNPO2L  | Synaptopodin 2-like                                                                                  |   |
| SYT12    | Synaptotagmin XII                                                                                    |   |
| SYTL1    | Synaptotagmin-like 1                                                                                 |   |
| TACC2    | Transforming, acidic coiled-coil containing protein 2                                                |   |
| TACR3    | Tachykinin receptor 3                                                                                |   |
| TADA2B   | Transcriptional adaptor 2B                                                                           |   |
| TAF1     | TAF1 RNA polymerase II, TATA box binding protein (TBP)-associated factor, 250 kDa                    |   |
| TAF15    | TAF15 RNA polymerase II, TATA box binding protein (TBP)-associated factor, 68 kDa                    | √ |
| TAF1A    | TATA box binding protein (TBP)-associated factor, RNA polymerase I, A, 48 kDa                        |   |
| TAF1L    | TAF1 RNA polymerase II, TATA box binding protein (TBP)-associated factor, 210 kDa-like               |   |
| TAMM41   | TAM41, mitochondrial translocator assembly and maintenance protein, homolog ( <i>S. Cerevisiae</i> ) |   |
| TANC2    | Tetratricopeptide repeat, ankyrin repeat and coiled-coil containing 2                                |   |
| TAPBPL   | TAP binding protein-like                                                                             |   |
| TARS2    | Threonyl-trna synthetase 2, mitochondrial (putative)                                                 |   |
| TAS2R20  | Taste receptor, type 2, member 20                                                                    |   |
| TBC1D22A | TBC1 domain family, member 22A                                                                       |   |
| TBC1D2B  | TBC1 domain family, member 2B                                                                        |   |
| TBCC     | Tubulin folding cofactor C                                                                           |   |

|              |                                                                                     |   |
|--------------|-------------------------------------------------------------------------------------|---|
| TBL2         | Transducin (beta)-like 2                                                            |   |
| TBPL1        | TBP-like 1                                                                          |   |
| TBRG4        | Transforming growth factor beta regulator 4                                         |   |
| TBX1         | T-box 1                                                                             |   |
| <b>TCEA1</b> | <b>Transcription elongation factor A (SII), 1</b>                                   | √ |
| TCEAL5       | Transcription elongation factor A (SII)-like 5                                      |   |
| TCEB3B       | Transcription elongation factor B polypeptide 3B (elongin A2)                       |   |
| TCF20        | Transcription factor 20 (AR1)                                                       |   |
| <b>TCF3</b>  | <b>Transcription factor 3 (E2A immunoglobulin enhancer binding factors E12/E47)</b> | √ |
| TCOF1        | Treacher Collins-Franceschetti syndrome 1                                           |   |
| TCP11        | T-complex 11 homolog (mouse)                                                        |   |
| TCP11L2      | T-complex 11 (mouse)-like 2                                                         |   |
| TCTEX1D4     | Tctex1 domain containing 4                                                          |   |
| TDG          | Thymine-DNA glycosylase                                                             |   |
| TDRD3        | Tudor domain containing 3                                                           |   |
| TDRD6        | Tudor domain containing 6                                                           |   |
| TECRL        | Trans-2,3-enoyl-coa reductase-like                                                  |   |
| TEP1         | Telomerase-associated protein 1                                                     |   |
| TERF1        | Telomeric repeat binding factor (NIMA-interacting) 1                                |   |
| TET1         | Tet methylcytosine dioxygenase 1                                                    |   |
| TET3         | Tet methylcytosine dioxygenase 3                                                    |   |
| TEX101       | Testis expressed 101                                                                |   |
| TEX264       | Testis expressed 264                                                                |   |
| TFAP2D       | Transcription factor AP-2 delta (activating enhancer binding protein 2 delta)       |   |
| TFCP2L1      | Transcription factor CP2-like 1                                                     |   |
| <b>TFEB</b>  | <b>Transcription factor EB</b>                                                      | √ |
| TGFB3        | Transforming growth factor, beta 3                                                  |   |
| TGFBR2       | Transforming growth factor, beta receptor II (70/80 kDa)                            |   |
| TGS1         | Trimethylguanosine synthase 1                                                       |   |
| THAP8        | THAP domain containing 8                                                            |   |
| THBD         | Thrombomodulin                                                                      |   |
| THBS3        | Thrombospondin 3                                                                    |   |
| THBS4        | Thrombospondin 4                                                                    |   |
| THEMIS       | Thymocyte selection associated                                                      |   |
| THG1L        | Trna-histidine guanylyltransferase 1-like ( <i>S. Cerevisiae</i> )                  |   |
| THOC5        | THO complex 5                                                                       |   |

|          |                                                                                 |  |
|----------|---------------------------------------------------------------------------------|--|
| THRA     | Thyroid hormone receptor, alpha                                                 |  |
| THSD4    | Thrombospondin, type I, domain containing 4                                     |  |
| THSD7A   | Thrombospondin, type I, domain containing 7A                                    |  |
| TICAM1   | Toll-like receptor adaptor molecule 1                                           |  |
| TIGD1    | Tigger transposable element derived 1                                           |  |
| TIGD2    | Tigger transposable element derived 2                                           |  |
| TIGD3    | Tigger transposable element derived 3                                           |  |
| TIMM50   | Translocase of inner mitochondrial membrane 50 homolog ( <i>S. Cerevisiae</i> ) |  |
| TJP2     | Tight junction protein 2 (zona occludens 2)                                     |  |
| TKTL1    | Transketolase-like 1                                                            |  |
| TLK2     | Tousled-like kinase 2                                                           |  |
| TLN2     | Talin 2                                                                         |  |
| TLR6     | Toll-like receptor 6                                                            |  |
| TLR9     | Toll-like receptor 9                                                            |  |
| TM4SF5   | Transmembrane 4 L six family member 5                                           |  |
| TM7SF3   | Transmembrane 7 superfamily member 3                                            |  |
| TMC7     | Transmembrane channel-like 7                                                    |  |
| TMCC3    | Transmembrane and coiled-coil domain family 3                                   |  |
| TMED1    | Transmembrane emp24 protein transport domain containing 1                       |  |
| TMEM100  | Transmembrane protein 100                                                       |  |
| TMEM102  | Transmembrane protein 102                                                       |  |
| TMEM104  | Transmembrane protein 104                                                       |  |
| TMEM106B | Transmembrane protein 106B                                                      |  |
| TMEM108  | Transmembrane protein 108                                                       |  |
| TMEM115  | Transmembrane protein 115                                                       |  |
| TMEM139  | Transmembrane protein 139                                                       |  |
| TMEM156  | Transmembrane protein 156                                                       |  |
| TMEM164  | Transmembrane protein 164                                                       |  |
| TMEM215  | Transmembrane protein 215                                                       |  |
| TMEM22   | Transmembrane protein 22                                                        |  |
| TMEM229A | Transmembrane protein 229A                                                      |  |
| TMEM229B | Transmembrane protein 229B                                                      |  |
| TMEM233  | Transmembrane protein 233                                                       |  |
| TMEM234  | Transmembrane protein 234                                                       |  |
| TMEM25   | Transmembrane protein 25                                                        |  |
| TMEM30C  | Transmembrane protein 30C                                                       |  |

|          |                                                                                   |  |
|----------|-----------------------------------------------------------------------------------|--|
| TMEM41B  | Transmembrane protein 41B                                                         |  |
| TMEM45B  | Transmembrane protein 45B                                                         |  |
| TMEM63A  | Transmembrane protein 63A                                                         |  |
| TMEM72   | Transmembrane protein 72                                                          |  |
| TMEM8A   | Transmembrane protein 8A                                                          |  |
| TMOD2    | Tropomodulin 2 (neuronal)                                                         |  |
| TMPRSS3  | Transmembrane protease, serine 3                                                  |  |
| TMTC2    | Transmembrane and tetratricopeptide repeat containing 2                           |  |
| TNC      | Tenascin C                                                                        |  |
| TNFRSF18 | Tumor necrosis factor receptor superfamily, member 18                             |  |
| TNIK     | TRAF2 and NCK interacting kinase                                                  |  |
| TNIP1    | TNFAIP3 interacting protein 1                                                     |  |
| TNKS1BP1 | Tankyrase 1 binding protein 1, 182kda                                             |  |
| TNR      | Tenascin R (restrictin, janusin)                                                  |  |
| TNRC18   | Trinucleotide repeat containing 18                                                |  |
| TNRC6A   | Trinucleotide repeat containing 6A                                                |  |
| TNRC6C   | Trinucleotide repeat containing 6C                                                |  |
| TNXB     | Tenascin XB                                                                       |  |
| TOMM70A  | Translocase of outer mitochondrial membrane 70 homolog A ( <i>S. Cerevisiae</i> ) |  |
| TOP3A    | Topoisomerase (DNA) III alpha                                                     |  |
| TOX      | Thymocyte selection-associated high mobility group box                            |  |
| TP63     | Tumor protein p63                                                                 |  |
| TP73     | Tumor protein p73                                                                 |  |
| TPCN2    | Two pore segment channel 2                                                        |  |
| TPO      | Thyroid peroxidase                                                                |  |
| TPT1     | Tumor protein, translationally-controlled 1                                       |  |
| TPX2     | TPX2, microtubule-associated, homolog ( <i>Xenopus laevis</i> )                   |  |
| TRAF4    | TNF receptor-associated factor 4                                                  |  |
| TRAP1    | TNF receptor-associated protein 1                                                 |  |
| TRBV20-1 | T cell receptor beta variable 20-1                                                |  |
| TREML4   | Triggering receptor expressed on myeloid cells-like 4                             |  |
| TRIB1    | Tribbles homolog 1 ( <i>Drosophila</i> )                                          |  |
| TRIM14   | Tripartite motif containing 14                                                    |  |
| TRIM21   | Tripartite motif containing 21                                                    |  |
| TRIM24   | Tripartite motif containing 24                                                    |  |
| TRIM25   | Tripartite motif containing 25                                                    |  |

|          |                                                                            |   |
|----------|----------------------------------------------------------------------------|---|
| TRIM28   | Tripartite motif containing 28                                             |   |
| TRIM3    | Tripartite motif containing 3                                              |   |
| TRIM31   | Tripartite motif containing 31                                             |   |
| TRIM33   | Tripartite motif containing 33                                             |   |
| TRIM41   | Tripartite motif containing 41                                             |   |
| TRIM42   | Tripartite motif containing 42                                             |   |
| TRIM44   | Tripartite motif containing 44                                             |   |
| TRIM52   | Tripartite motif containing 52                                             |   |
| TRIM56   | Tripartite motif containing 56                                             |   |
| TRIM65   | Tripartite motif containing 65                                             |   |
| TRIP6    | Thyroid hormone receptor interactor 6                                      |   |
| TRMT1    | TRM1 trna methyltransferase 1 homolog ( <i>S. Cerevisiae</i> )             |   |
| TRMT61A  | Trna methyltransferase 61 homolog A ( <i>S. Cerevisiae</i> )               |   |
| TRNAU1AP | Trna selenocysteine 1 associated protein 1                                 |   |
| TRO      | Trophinin                                                                  |   |
| TROVE2   | TROVE domain family, member 2                                              |   |
| TRPM4    | Transient receptor potential cation channel, subfamily M, member 4         |   |
| TRPM5    | Transient receptor potential cation channel, subfamily M, member 5         |   |
| TRPM7    | Transient receptor potential cation channel, subfamily M, member 7         |   |
| TRPM8    | Transient receptor potential cation channel, subfamily M, member 8         |   |
| TRUB1    | Trub pseudouridine (psi) synthase homolog 1 ( <i>E. Coli</i> )             |   |
| TRUB2    | Trub pseudouridine (psi) synthase homolog 2 ( <i>E. Coli</i> )             |   |
| TSC1     | Tuberous sclerosis 1                                                       | √ |
| TSHZ1    | Teashirt zinc finger homeobox 1                                            |   |
| TSHZ2    | Teashirt zinc finger homeobox 2                                            |   |
| TSKU     | Tsukushi small leucine rich proteoglycan homolog ( <i>Xenopus laevis</i> ) |   |
| TSN      | Translin                                                                   |   |
| TSNARE1  | T-SNARE domain containing 1                                                |   |
| TSPAN11  | Tetraspanin 11                                                             |   |
| TSPAN15  | Tetraspanin 15                                                             |   |
| TSPAN3   | Tetraspanin 3                                                              |   |
| TSPAN31  | Tetraspanin 31                                                             |   |
| TSPAN5   | Tetraspanin 5                                                              |   |
| TSPAN9   | Tetraspanin 9                                                              |   |
| TSPEAR   | Thrombospondin-type laminin G domain and EAR repeats                       |   |
| TSPYL4   | TSPY-like 4                                                                |   |

|         |                                                                    |  |
|---------|--------------------------------------------------------------------|--|
| TSSC4   | Tumor suppressing subtransferable candidate 4                      |  |
| TSTD2   | Thiosulfate sulfurtransferase (rhodanese)-like domain containing 2 |  |
| TTBK2   | Tau tubulin kinase 2                                               |  |
| TTC21B  | Tetratricopeptide repeat domain 21B                                |  |
| TTC22   | Tetratricopeptide repeat domain 22                                 |  |
| TTC3    | Tetratricopeptide repeat domain 3                                  |  |
| TTC31   | Tetratricopeptide repeat domain 31                                 |  |
| TTC38   | Tetratricopeptide repeat domain 38                                 |  |
| TTC8    | Tetratricopeptide repeat domain 8                                  |  |
| TTF1    | Transcription termination factor, RNA polymerase I                 |  |
| TTLL1   | Tubulin tyrosine ligase-like family, member 1                      |  |
| TTLL11  | Tubulin tyrosine ligase-like family, member 11                     |  |
| TTLL3   | Tubulin tyrosine ligase-like family, member 3                      |  |
| TTLL8   | Tubulin tyrosine ligase-like family, member 8                      |  |
| TTN     | Titin                                                              |  |
| TTPAL   | Tocopherol (alpha) transfer protein-like                           |  |
| TTYH1   | Tweety homolog 1 (Drosophila)                                      |  |
| TUB     | Tubby homolog (mouse)                                              |  |
| TUBA4A  | Tubulin, alpha 4a                                                  |  |
| TUBGCP6 | Tubulin, gamma complex associated protein 6                        |  |
| TULP4   | Tubby like protein 4                                               |  |
| TXN2    | Thioredoxin 2                                                      |  |
| TXNRD1  | Thioredoxin reductase 1                                            |  |
| TYRO3   | TYRO3 protein tyrosine kinase                                      |  |
| TYW5    | Trna-yw synthesizing protein 5                                     |  |
| U2AF1L4 | U2 small nuclear RNA auxiliary factor 1-like 4                     |  |
| UAP1L1  | UDP-N-acetylglucosamine pyrophosphorylase 1-like 1                 |  |
| UBA1    | Ubiquitin-like modifier activating enzyme 1                        |  |
| UBA3    | Ubiquitin-like modifier activating enzyme 3                        |  |
| UBA5    | Ubiquitin-like modifier activating enzyme 5                        |  |
| UBA7    | Ubiquitin-like modifier activating enzyme 7                        |  |
| UBASH3B | Ubiquitin associated and SH3 domain containing B                   |  |
| UBC     | Ubiquitin C                                                        |  |
| UBE2CBP | Ubiquitin-conjugating enzyme E2C binding protein                   |  |
| UBE2G2  | Ubiquitin-conjugating enzyme E2G 2                                 |  |
| UBE2H   | Ubiquitin-conjugating enzyme E2H                                   |  |

|          |                                                                  |   |
|----------|------------------------------------------------------------------|---|
| UBE2L3   | Ubiquitin-conjugating enzyme E2L 3                               |   |
| UBN1     | Ubinuclein 1                                                     |   |
| UBQLN1   | Ubiquilin 1                                                      |   |
| UBQLN3   | Ubiquilin 3                                                      |   |
| UBR4     | Ubiquitin protein ligase E3 component n-recognin 4               |   |
| UBR5     | Ubiquitin protein ligase E3 component n-recognin 5               | √ |
| UBTF     | Upstream binding transcription factor, RNA polymerase I          |   |
| UBXN2A   | UBX domain protein 2A                                            |   |
| UCK1     | Uridine-cytidine kinase 1                                        |   |
| UFM1     | Ubiquitin-fold modifier 1                                        |   |
| UGT3A1   | UDP glycosyltransferase 3 family, polypeptide A1                 |   |
| UGT8     | UDP glycosyltransferase 8                                        |   |
| UHRF1BP1 | UHRF1 binding protein 1                                          |   |
| ULBP1    | UL16 binding protein 1                                           |   |
| ULK3     | Unc-51-like kinase 3 ( <i>C. Elegans</i> )                       |   |
| UMOD     | Uromodulin                                                       |   |
| UNC5A    | Unc-5 homolog A ( <i>C. Elegans</i> )                            |   |
| UNC5B    | Unc-5 homolog B ( <i>C. Elegans</i> )                            |   |
| UNC5C    | Unc-5 homolog C ( <i>C. Elegans</i> )                            |   |
| UNC5CL   | Unc-5 homolog C ( <i>C. Elegans</i> )-like                       |   |
| UPK1A    | Uroplakin 1A                                                     |   |
| UPK2     | Uroplakin 2                                                      |   |
| UQCC     | Ubiquinol-cytochrome c reductase complex chaperone               |   |
| UQCRC2   | Ubiquinol-cytochrome c reductase core protein II                 |   |
| UROC1    | Urocanase domain containing 1                                    |   |
| USH1C    | Usher syndrome 1C (autosomal recessive, severe)                  |   |
| USHBP1   | Usher syndrome 1C binding protein 1                              |   |
| USP10    | Ubiquitin specific peptidase 10                                  |   |
| USP31    | Ubiquitin specific peptidase 31                                  |   |
| USP37    | Ubiquitin specific peptidase 37                                  |   |
| USP4     | Ubiquitin specific peptidase 4 (proto-oncogene)                  |   |
| USP43    | Ubiquitin specific peptidase 43                                  |   |
| USP6     | Ubiquitin specific peptidase 6 (Tre-2 oncogene)                  | √ |
| USP9X    | Ubiquitin specific peptidase 9, X-linked                         |   |
| USP9Y    | Ubiquitin specific peptidase 9, Y-linked                         |   |
| UTP23    | UTP23, small subunit (SSU) processome component, homolog (yeast) |   |



|         |                                                                        |   |
|---------|------------------------------------------------------------------------|---|
| UTS2    | Urotensin 2                                                            |   |
| UTY     | Ubiquitously transcribed tetratricopeptide repeat gene, Y-linked       |   |
| UVRAG   | UV radiation resistance associated gene                                |   |
| UXS1    | UDP-glucuronate decarboxylase 1                                        |   |
| VAMP1   | Vesicle-associated membrane protein 1 (synaptobrevin 1)                |   |
| VAMP2   | Vesicle-associated membrane protein 2 (synaptobrevin 2)                |   |
| VARS    | Valyl-trna synthetase                                                  |   |
| VAV2    | Vav 2 guanine nucleotide exchange factor                               |   |
| VCL     | Vinculin                                                               |   |
| VCPIP1  | Valosin containing protein (p97)/p47 complex interacting protein 1     |   |
| VGLL1   | Vestigial like 1 (Drosophila)                                          |   |
| VHL     | Von Hippel-Lindau tumor suppressor                                     | √ |
| VILL    | Villin-like                                                            |   |
| VIM     | Vimentin                                                               |   |
| VIPR2   | Vasoactive intestinal peptide receptor 2                               |   |
| VIT     | Vitrin                                                                 |   |
| VMA21   | VMA21 vacuolar H <sup>+</sup> -atpase homolog ( <i>S. Cerevisiae</i> ) |   |
| VPS13B  | Vacuolar protein sorting 13 homolog B (yeast)                          |   |
| VPS13D  | Vacuolar protein sorting 13 homolog D ( <i>S. Cerevisiae</i> )         |   |
| VPS18   | Vacuolar protein sorting 18 homolog ( <i>S. Cerevisiae</i> )           |   |
| VPS4A   | Vacuolar protein sorting 4 homolog A ( <i>S. Cerevisiae</i> )          |   |
| VPS4B   | Vacuolar protein sorting 4 homolog B ( <i>S. Cerevisiae</i> )          |   |
| VRK3    | Vaccinia related kinase 3                                              |   |
| VSIG10L | V-set and immunoglobulin domain containing 10 like                     |   |
| VSTM2A  | V-set and transmembrane domain containing 2A                           |   |
| VWA3A   | Von Willebrand factor A domain containing 3A                           |   |
| VWA5A   | Von Willebrand factor A domain containing 5A                           |   |
| WAPAL   | Wings apart-like homolog (Drosophila)                                  |   |
| WBSCR17 | Williams-Beuren syndrome chromosome region 17                          |   |
| WBSCR22 | Williams Beuren syndrome chromosome region 22                          |   |
| WDFY4   | WDFY family member 4                                                   |   |
| WDR17   | WD repeat domain 17                                                    |   |
| WDR3    | WD repeat domain 3                                                     |   |
| WDR34   | WD repeat domain 34                                                    |   |
| WDR47   | WD repeat domain 47                                                    |   |
| WDR60   | WD repeat domain 60                                                    |   |

|                |                                                                                                    |   |
|----------------|----------------------------------------------------------------------------------------------------|---|
| WDR70          | WD repeat domain 70                                                                                |   |
| WDR82          | WD repeat domain 82                                                                                |   |
| WDR90          | WD repeat domain 90                                                                                |   |
| WDR91          | WD repeat domain 91                                                                                |   |
| <b>WHSC1L1</b> | <b>Wolf-Hirschhorn syndrome candidate 1-like 1</b>                                                 | √ |
| WIPF3          | WAS/WASL interacting protein family, member 3                                                      |   |
| WIZ            | Widely interspaced zinc finger motifs                                                              |   |
| WNK2           | WNK lysine deficient protein kinase 2                                                              |   |
| WNK3           | WNK lysine deficient protein kinase 3                                                              |   |
| WNT1           | Wingless-type MMTV integration site family, member 1                                               |   |
| WNT4           | Wingless-type MMTV integration site family, member 4                                               |   |
| WNT7B          | Wingless-type MMTV integration site family, member 7B                                              |   |
| WNT9A          | Wingless-type MMTV integration site family, member 9A                                              |   |
| WNT9B          | Wingless-type MMTV integration site family, member 9B                                              |   |
| WWC3           | WWC family member 3                                                                                |   |
| XIAP           | X-linked inhibitor of apoptosis                                                                    |   |
| XKR4           | XK, Kell blood group complex subunit-related family, member 4                                      |   |
| XPO5           | Exportin 5                                                                                         |   |
| XPO7           | Exportin 7                                                                                         |   |
| XPOT           | Exportin, tRNA (nuclear export receptor for tRNAs)                                                 |   |
| XRRA1          | X-ray radiation resistance associated 1                                                            |   |
| XXbac-         | Uncharacterized proteinuncharacterized proteincdna FLJ55673, highly similar to Complement factor B |   |
| XXbac-         | HCG43720, isoform CRA_ alymphocyte antigen 6 complex, locus g6dlymphocyte antigen 6 complex, locus |   |
| YAP1           | Yes-associated protein 1                                                                           |   |
| YBX1           | Y box binding protein 1                                                                            |   |
| YBX2           | Y box binding protein 2                                                                            |   |
| YEATS2         | YEATS domain containing 2                                                                          |   |
| YES1           | V-yes-1 Yamaguchi sarcoma viral oncogene homolog 1                                                 |   |
| <b>YWHAE</b>   | <b>Tyrosine 3-monooxygenase/tryptophan 5-monooxygenase activation protein, epsilon polypeptide</b> | √ |
| YWHAG          | Tyrosine 3-monooxygenase/tryptophan 5-monooxygenase activation protein, gamma polypeptide          |   |
| YY1AP1         | YY1 associated protein 1                                                                           |   |
| ZBED4          | Zinc finger, BED-type containing 4                                                                 |   |
| ZBTB11         | Zinc finger and BTB domain containing 11                                                           |   |
| ZBTB40         | Zinc finger and BTB domain containing 40                                                           |   |
| ZBTB47         | Zinc finger and BTB domain containing 47                                                           |   |
| ZBTB48         | Zinc finger and BTB domain containing 48                                                           |   |

|         |                                                         |  |
|---------|---------------------------------------------------------|--|
| ZBTB7A  | Zinc finger and BTB domain containing 7A                |  |
| ZBTB80S | Zinc finger and BTB domain containing 8 opposite strand |  |
| ZC3H10  | Zinc finger CCCH-type containing 10                     |  |
| ZC3H12A | Zinc finger CCCH-type containing 12A                    |  |
| ZC3H3   | Zinc finger CCCH-type containing 3                      |  |
| ZC3H6   | Zinc finger CCCH-type containing 6                      |  |
| ZCCHC14 | Zinc finger, CCHC domain containing 14                  |  |
| ZCCHC9  | Zinc finger, CCHC domain containing 9                   |  |
| ZDHHC1  | Zinc finger, DHHC-type containing 1                     |  |
| ZDHHC14 | Zinc finger, DHHC-type containing 14                    |  |
| ZDHHC15 | Zinc finger, DHHC-type containing 15                    |  |
| ZDHHC22 | Zinc finger, DHHC-type containing 22                    |  |
| ZDHHC23 | Zinc finger, DHHC-type containing 23                    |  |
| ZDHHC3  | Zinc finger, DHHC-type containing 3                     |  |
| ZFAND3  | Zinc finger, AN1-type domain 3                          |  |
| ZFC3H1  | Zinc finger, C3H1-type containing                       |  |
| ZFHX3   | Zinc finger homeobox 3                                  |  |
| ZFHX4   | Zinc finger homeobox 4                                  |  |
| ZFP106  | Zinc finger protein 106 homolog (mouse)                 |  |
| ZFP41   | Zinc finger protein 41 homolog (mouse)                  |  |
| ZFP90   | Zinc finger protein 90 homolog (mouse)                  |  |
| ZFR     | Zinc finger RNA binding protein                         |  |
| ZFYVE20 | Zinc finger, FYVE domain containing 20                  |  |
| ZFYVE28 | Zinc finger, FYVE domain containing 28                  |  |
| ZIC3    | Zic family member 3                                     |  |
| ZKSCAN1 | Zinc finger with KRAB and SCAN domains 1                |  |
| ZMIZ1   | Zinc finger, MIZ-type containing 1                      |  |
| ZNF107  | Zinc finger protein 107                                 |  |
| ZNF131  | Zinc finger protein 131                                 |  |
| ZNF143  | Zinc finger protein 143                                 |  |
| ZNF197  | Zinc finger protein 197                                 |  |
| ZNF212  | Zinc finger protein 212                                 |  |
| ZNF214  | Zinc finger protein 214                                 |  |
| ZNF217  | Zinc finger protein 217                                 |  |
| ZNF23   | Zinc finger protein 23 (KOX 16)                         |  |
| ZNF26   | Zinc finger protein 26                                  |  |

|         |                          |  |
|---------|--------------------------|--|
| ZNF275  | Zinc finger protein 275  |  |
| ZNF276  | Zinc finger protein 276  |  |
| ZNF277  | Zinc finger protein 277  |  |
| ZNF3    | Zinc finger protein 3    |  |
| ZNF300  | Zinc finger protein 300  |  |
| ZNF304  | Zinc finger protein 304  |  |
| ZNF346  | Zinc finger protein 346  |  |
| ZNF35   | Zinc finger protein 35   |  |
| ZNF354B | Zinc finger protein 354B |  |
| ZNF365  | Zinc finger protein 365  |  |
| ZNF385A | Zinc finger protein 385A |  |
| ZNF394  | Zinc finger protein 394  |  |
| ZNF426  | Zinc finger protein 426  |  |
| ZNF445  | Zinc finger protein 445  |  |
| ZNF462  | Zinc finger protein 462  |  |
| ZNF471  | Zinc finger protein 471  |  |
| ZNF483  | Zinc finger protein 483  |  |
| ZNF485  | Zinc finger protein 485  |  |
| ZNF496  | Zinc finger protein 496  |  |
| ZNF497  | Zinc finger protein 497  |  |
| ZNF507  | Zinc finger protein 507  |  |
| ZNF510  | Zinc finger protein 510  |  |
| ZNF512B | Zinc finger protein 512B |  |
| ZNF519  | Zinc finger protein 519  |  |
| ZNF521  | Zinc finger protein 521  |  |
| ZNF527  | Zinc finger protein 527  |  |
| ZNF536  | Zinc finger protein 536  |  |
| ZNF544  | Zinc finger protein 544  |  |
| ZNF609  | Zinc finger protein 609  |  |
| ZNF616  | Zinc finger protein 616  |  |
| ZNF628  | Zinc finger protein 628  |  |
| ZNF638  | Zinc finger protein 638  |  |
| ZNF644  | Zinc finger protein 644  |  |
| ZNF662  | Zinc finger protein 662  |  |
| ZNF665  | Zinc finger protein 665  |  |
| ZNF683  | Zinc finger protein 683  |  |

|         |                                              |  |
|---------|----------------------------------------------|--|
| ZNF687  | Zinc finger protein 687                      |  |
| ZNF70   | Zinc finger protein 70                       |  |
| ZNF701  | Zinc finger protein 701                      |  |
| ZNF704  | Zinc finger protein 704                      |  |
| ZNF710  | Zinc finger protein 710                      |  |
| ZNF711  | Zinc finger protein 711                      |  |
| ZNF713  | Zinc finger protein 713                      |  |
| ZNF765  | Zinc finger protein 765                      |  |
| ZNF776  | Zinc finger protein 776                      |  |
| ZNF778  | Zinc finger protein 778                      |  |
| ZNF813  | Zinc finger protein 813                      |  |
| ZNRF3   | Zinc and ring finger 3                       |  |
| ZNRF4   | Zinc and ring finger 4                       |  |
| ZP4     | Zona pellucida glycoprotein 4                |  |
| ZRANB1  | Zinc finger, RAN-binding domain containing 1 |  |
| ZSCAN2  | Zinc finger and SCAN domain containing 2     |  |
| ZSCAN29 | Zinc finger and SCAN domain containing 29    |  |
| ZSCAN5A | Zinc finger and SCAN domain containing 5A    |  |
| ZSWIM1  | Zinc finger, SWIM-type containing 1          |  |
| ZSWIM6  | Zinc finger, SWIM-type containing 6          |  |
| ZSWIM7  | Zinc finger, SWIM-type containing 7          |  |
| ZYG11B  | Zyg-11 homolog B ( <i>C. Elegans</i> )       |  |
