# Supplementary material
Source: publisher site journal article supplement (https://www.dovepress.com/article/73551)
Supplement: Supplementary file 3 [file get_supplementary_file.php]

**Supplementary Table 17. Predicted targets of hsa-miR-181a-3p by TargetMiner.**

| <b>Gene symbol</b> | <b>mRNA ID</b> | <b>Chromosomal location</b> | <b>Aliases</b>                             | <b>Gene name</b>                                               | <b>Cancer gene</b> |
|--------------------|----------------|-----------------------------|--------------------------------------------|----------------------------------------------------------------|--------------------|
| CD47               | NM_001025079   | 3q13.1-q13.2                | IAP; OA3; MER6                             | CD47 molecule                                                  | ×                  |
| CELF2              | NM_001025077   | 10p13                       | ETR3; ETR-3; NAPOR; CUGBP2; BRUNOL3        | CUGBP, Elav-like family member 2                               | ×                  |
| CPNE3              | NM_003909      | 8q21.3                      | CPN3; PRO1071                              | Copine III                                                     | ×                  |
| FECH               | NM_001012515   | 18q21.3                     | 18q21.3                                    | Ferrochelatase                                                 | ×                  |
| FGF5               | NM_004464      | 4q21                        | HBGF-5; TCMGLY; Smag-82                    | Fibroblast growth factor 5                                     | ×                  |
| IKZF2              | NM_016260      | 2q34                        | ANF1A2; HELIOS; ZNF1A2; ZNFN1A2            | IKAROS family zinc finger 2 (Helios)                           | ×                  |
| MIER1              | NM_020948      | 1p31.3                      | ER1; MI-ER1                                | Mesoderm induction early response 1, transcriptional regulator | ×                  |
| NLGN1              | NM_014932      | 3q26.31                     | NL1                                        | Neurologin 1                                                   | ×                  |
| NR2C2              | NM_003298      | 3p25                        | TR4; TAK1                                  | Nuclear receptor subfamily 2, group C, member 2                | ×                  |
| RBM12B             | NM_203390      | 8q22.1                      | MGC:33837                                  | RNA binding motif protein 12B                                  | ×                  |
| SMAD2              | NM_001003652   | 18q21.1                     | JV18; MADH2; MADR2; JV18-1; hMAD-2; hSMAD2 | SMAD family member 2                                           | ×                  |
| SRSF8              | NM_032102      | 11q22                       | DSM-1; SRP46; SFRS2B                       | Serine/arginine-rich splicing factor 8                         | ×                  |
| TLR4               | NM_138554      | 9q33.1                      | TOLL; CD284; TLR-4; ARMD10                 | Toll-like receptor 4                                           | ×                  |

**Supplementary Table 18. Predicted targets of hsa-miR-181a-3p by MicroCosm Targets.**

| <b>Gene symbol</b> | <b>Full name</b>                                                                                                                                                                  | <b>Cancer gene</b> | <b>Score</b> | <b>Energy</b> | <b>P value</b> | <b>Length</b> | <b>Total sites</b> | <b>No. of cons species</b> | <b>No. miRNAs</b> |
|--------------------|-----------------------------------------------------------------------------------------------------------------------------------------------------------------------------------|--------------------|--------------|---------------|----------------|---------------|--------------------|----------------------------|-------------------|
| ABCA9              | ATP-binding cassette sub-family A member 9                                                                                                                                        |                    | 15.8201      | -27.38        | 1.00E-06       | 956           | 19                 | 9                          | 29 [+]            |
| ABCC10             | Multidrug resistance-associated protein 7 (ATP-binding cassette sub- family C member 10)                                                                                          |                    | 17.3718      | -22.01        | 1.00E-06       | 510           | 17                 | 2                          | 44 [+]            |
| ABCC10             | Multidrug resistance-associated protein 7 (ATP-binding cassette sub- family C member 10)                                                                                          |                    | 14.4228      | -18.51        | 1.00E-06       | 339           | 20                 | 1                          | 50 [+]            |
| ABCC11             | ATP-binding cassette transporter sub-family C member 11 (Multidrug resistance-associated protein 8)                                                                               |                    | 15.7302      | -14.62        | 1.00E-06       | 458           | 23                 | 6                          | 48 [+]            |
| ABCF2              | ATP-binding cassette sub-family F member 2 (Iron-inhibited ABC transporter 2)                                                                                                     |                    | 16.2019      | -31.37        | 1.00E-06       | 1000          | 29                 | 2                          | 18 [+]            |
| ABCG8              | ATP-binding cassette sub-family G member 8 (Sterolin-2)                                                                                                                           |                    | 14.874       | -20.6         | 1.21E-05       | 595           | 15                 | 1                          | 21 [+]            |
| ABCG8              | ATP-binding cassette sub-family G member 8 (Sterolin-2)                                                                                                                           |                    | 15.0382      | -12.56        | 1.38E-05       | 399           | 16                 | 12                         | 50 [+]            |
| ABP1               | Amiloride-sensitive amine oxidase [copper-containing] precursor (EC 1.4.3.6) (Diamine oxidase) (DAO) (Amiloride-binding protein) (ABP) (Histaminase) (Kidney amine oxidase) (KAO) |                    | 14.7615      | -12.95        | 1.57E-05       | 408           | 17                 | 4                          | 51 [+]            |
| ACBD7              | Acyl-CoA-binding domain-containing protein 7                                                                                                                                      |                    | 16.5577      | -24.97        | 2.47E-05       | 1159          | 14                 | 3                          | 17 [+]            |
| ACBD7              | Acyl-CoA-binding domain-containing protein 7                                                                                                                                      |                    | 14.554       | -10.6         | 3.21E-05       | 251           | 11                 | 2                          | 35 [+]            |
| ACBD7              | Acyl-CoA-binding domain-containing protein 7                                                                                                                                      |                    | 14.1206      | -14.1         | 3.34E-05       | 486           | 20                 | 7                          | 50 [+]            |

|         |                                                                                                                                                                        |         |        |          |      |    |   |        |
|---------|------------------------------------------------------------------------------------------------------------------------------------------------------------------------|---------|--------|----------|------|----|---|--------|
| ACHE    | Acetylcholinesterase precursor (EC 3.1.1.7) (AChE)                                                                                                                     | 14.2345 | -17.01 | 3.82E-05 | 4013 | 3  | 2 | 3 [+]  |
| ACRC    | ACRC protein                                                                                                                                                           | 14.3618 | -19.15 | 4.12E-05 | 1693 | 9  | 3 | 9 [+]  |
| ACRC    | ACRC protein                                                                                                                                                           | 15.3119 | -10.24 | 4.13E-05 | 373  | 18 | 5 | 50 [+] |
| ACTN4   | Alpha-actinin-4 (Non-muscle alpha-actinin 4) (F-actin cross-linking protein)                                                                                           | 16.3516 | -21.37 | 4.61E-05 | 343  | 19 | 5 | 68 [+] |
| ACTR3   | Actin-like protein 3 (Actin-related protein 3)                                                                                                                         | 16.6931 | -14.57 | 4.75E-05 | 661  | 17 | 1 | 18 [+] |
| ACTR3B  | Actin-related protein 3-beta isoform 2                                                                                                                                 | 14.4017 | -14.93 | 7.47E-05 | 1000 | 15 | 1 | 16 [+] |
| ADCY3   | Adenylate cyclase type 3 (EC 4.6.1.1) (Adenylate cyclase type III) (ATP pyrophosphate-lyase 3) (Adenylyl cyclase 3) (AC-III) (AC3) (Adenylate cyclase, olfactive type) | 14.2422 | -12.59 | 8.19E-05 | 1000 | 12 | 1 | 14 [+] |
| ADRA1A  | Alpha-1A adrenergic receptor (Alpha 1A-adrenoceptor) (Alpha 1A- adrenoceptor) (Alpha-1C adrenergic receptor) (Alpha adrenergic receptor 1c)                            | 15.1386 | -17.85 | 8.34E-05 | 1000 | 14 | 1 | 13 [+] |
| AFF2    | AF4/FMR2 family member 2 (Fragile X mental retardation 2 protein) (Protein FMR-2) (FMR2P) (Protein Ox19) (Fragile X E mental retardation syndrome protein)             | 15.0761 | -21.76 | 8.55E-05 | 524  | 22 | 7 | 46 [+] |
| AHCTF1P | CDNA FLJ32832 fis, clone TESTI2003196. (Fragment)                                                                                                                      | 14.6224 | -14.35 | 8.70E-05 | 986  | 16 | 6 | 20 [+] |
| AHI1    | Jouberin (Abelson helper integration site 1 protein homolog) (AHI-1)                                                                                                   | 14.216  | -18.7  | 8.85E-05 | 1000 | 16 | 4 | 17 [+] |
| AHRR    | Programmed cell death protein 6 (Probable calcium-binding protein ALG- 2)                                                                                              | 14.554  | -10.47 | 8.94E-05 | 289  | 17 | 3 | 48 [+] |
| AIM1L   | Absent in melanoma 1-like                                                                                                                                              | 15.5985 | -15.14 | 8.94E-05 | 337  | 18 | 1 | 53 [+] |
| AIRE    | Autoimmune regulator (Autoimmune polyendocrinopathy candidiasis ectodermal dystrophy protein) (APECED protein)                                                         | 14.2017 | -17.22 | 9.24E-05 | 1000 | 10 | 1 | 10 [+] |

|          |                                                                                                                                                                                                                                                                           |   |         |        |          |      |    |   |        |
|----------|---------------------------------------------------------------------------------------------------------------------------------------------------------------------------------------------------------------------------------------------------------------------------|---|---------|--------|----------|------|----|---|--------|
| AKT2     | RAC-beta serine/threonine-protein kinase (EC 2.7.11.1) (RAC-PK-beta) (Protein kinase Akt-2) (Protein kinase B, beta) (PKB beta)                                                                                                                                           | √ | 14.2017 | -17.22 | 9.24E-05 | 1000 | 13 | 1 | 15 [+] |
| ALDH18A1 | Delta 1-pyrroline-5-carboxylate synthetase (P5CS) (Aldehyde dehydrogenase 18 family member A1) [Includes: Glutamate 5-kinase (EC 2.7.2.11) (Gamma-glutamyl kinase) (GK); Gamma-glutamyl phosphate reductase (GPR) (EC 1.2.1.41) (Glutamate-5-semialdehyde dehydrogenase)] |   | 14.3125 | -10.61 | 9.27E-05 | 348  | 21 | 1 | 55 [+] |
| ALDH18A1 | Delta 1-pyrroline-5-carboxylate synthetase (P5CS) (Aldehyde dehydrogenase 18 family member A1) [Includes: Glutamate 5-kinase (EC 2.7.2.11) (Gamma-glutamyl kinase) (GK); Gamma-glutamyl phosphate reductase (GPR) (EC 1.2.1.41) (Glutamate-5-semialdehyde dehydrogenase)] |   | 14.8669 | -15.03 | 9.98E-05 | 427  | 21 | 3 | 64 [+] |
| ALDH2    | Aldehyde dehydrogenase, mitochondrial precursor (EC 1.2.1.3) (ALDH class 2) (ALDHI) (ALDH-E2)                                                                                                                                                                             |   | 14.5901 | -15.43 | 0.000106 | 1364 | 17 | 6 | 17 [+] |
| ALDH4A1  | Delta-1-pyrroline-5-carboxylate dehydrogenase, mitochondrial precursor (EC 1.5.1.12) (P5C dehydrogenase) (Aldehyde dehydrogenase 4A1)                                                                                                                                     |   | 14.56   | -15.51 | 0.000109 | 738  | 23 | 6 | 42 [+] |
| ALDH6A1  | Methylmalonate-semialdehyde dehydrogenase [acylating], mitochondrial precursor (EC 1.2.1.27) (MMSDH) (Malonate-semialdehyde dehydrogenase [acylating]) (EC 1.2.1.18)                                                                                                      |   | 14.1419 | -11.41 | 0.00011  | 1000 | 15 | 1 | 15 [+] |
| ALG14    | UDP-N-acetylglucosamine transferase subunit ALG14 homolog                                                                                                                                                                                                                 |   | 17.7377 | -22.05 | 0.000117 | 198  | 10 | 4 | 60 [+] |
| AMOT     | Angiomotin                                                                                                                                                                                                                                                                |   | 15.3199 | -20.9  | 0.000117 | 438  | 20 | 6 | 48 [+] |

|         |                                                                                                                                                                                                                                                                |  |         |        |          |      |    |   |          |
|---------|----------------------------------------------------------------------------------------------------------------------------------------------------------------------------------------------------------------------------------------------------------------|--|---------|--------|----------|------|----|---|----------|
| ANKRD35 | Ankyrin repeat domain-containing protein 25                                                                                                                                                                                                                    |  | 15.3867 | -22.15 | 0.000132 | 463  | 23 | 6 | 54 [ + ] |
| ANP32B  | Acidic leucine-rich nuclear phosphoprotein 32 family member B (PHAPI2 protein) (Silver-stainable protein SSP29) (Acidic protein rich in leucines)                                                                                                              |  | 16.8281 | -16.91 | 0.000134 | 272  | 17 | 6 | 74 [ + ] |
| ANPEP   | Aminopeptidase N (EC 3.4.11.2) (hAPN) (Alanyl aminopeptidase) (Microsomal aminopeptidase) (Aminopeptidase M) (gp150) (Myeloid plasma membrane glycoprotein CD13) (CD13 antigen)                                                                                |  | 16.7144 | -13.54 | 0.000136 | 205  | 11 | 1 | 39 [ + ] |
| ANXA1   | Annexin A1 (Annexin I) (Lipocortin I) (Calpactin II) (Chromobindin-9) (p35) (Phospholipase A2 inhibitory protein)                                                                                                                                              |  | 14.7637 | -20.71 | 0.000152 | 1193 | 18 | 5 | 21 [ + ] |
| ANXA13  | Annexin A13 (Annexin XIII) (Annexin, intestine-specific) (ISA)                                                                                                                                                                                                 |  | 14.6731 | -22.27 | 0.000158 | 2232 | 12 | 8 | 12 [ + ] |
| APBB1IP | Amyloid beta A4 precursor protein-binding family B member 1- interacting protein (APBB1-interacting protein 1) (Rap1-GTP-interacting adapter molecule) (RIAM) (Proline-rich EVH1 ligand 1) (PREL-1) (Proline-rich protein 73) (Retinoic acid-responsive prolin |  | 14.1854 | -16.29 | 0.000162 | 763  | 19 | 8 | 31 [ + ] |
| APLP2   | Amyloid-like protein 2 precursor (Amyloid protein homolog) (APPH) (CDEI box-binding protein) (CDEBP)                                                                                                                                                           |  | 14.6652 | -16.85 | 0.00017  | 602  | 19 | 5 | 54 [ + ] |
| APOC2   | Apolipoprotein C-II precursor (Apo-CII) (ApoC-II)                                                                                                                                                                                                              |  | 14.0992 | -13.39 | 0.000173 | 188  | 10 | 6 | 45 [ + ] |
| APOOL   | Apolipoprotein O-like precursor (Protein FAM121A)                                                                                                                                                                                                              |  | 15.8396 | -19.23 | 0.000198 | 816  | 14 | 7 | 30 [ + ] |

|          |                                                                                                                                                                                                                                                                 |         |        |          |      |    |   |        |
|----------|-----------------------------------------------------------------------------------------------------------------------------------------------------------------------------------------------------------------------------------------------------------------|---------|--------|----------|------|----|---|--------|
| APP      | Amyloid beta A4 protein precursor (APP) (ABPP) (Alzheimer disease amyloid protein) (Cerebral vascular amyloid peptide) (CVAP) (Protease nexin-II) (PN-II) (APPI) (PreA4) [Contains: Soluble APP-alpha (S-APP- alpha); Soluble APP-beta (S-APP-beta); C99; Beta- | 16.487  | -18.35 | 0.000204 | 262  | 16 | 6 | 71 [+] |
| AQP9     | Aquaporin-9 (AQP-9) (Small solute channel 1)                                                                                                                                                                                                                    | 14.8951 | -15.71 | 0.00023  | 323  | 16 | 4 | 68 [+] |
| ARFIP1   | Arfaptin-1 (ADP-ribosylation factor-interacting protein 1)                                                                                                                                                                                                      | 15.1262 | -15.32 | 0.000254 | 1000 | 14 | 9 | 22 [+] |
| ARHGAP22 | Rho GTPase-activating protein 22 (Rho-type GTPase-activating protein 22)                                                                                                                                                                                        | 15.4019 | -15.72 | 0.000293 | 1000 | 17 | 1 | 17 [+] |
| ARHGDI1  | Rho GDP-dissociation inhibitor 1 (Rho GDI 1) (Rho-GDI alpha)                                                                                                                                                                                                    | 17.0555 | -14.24 | 0.000295 | 157  | 8  | 3 | 33 [+] |
| ARHGEF9  | Rho guanine nucleotide exchange factor 9 (Rac/Cdc42 guanine nucleotide exchange factor 9) (Collybistin) (PEM-2 homolog)                                                                                                                                         | 14.3132 | -12.55 | 0.000341 | 1000 | 21 | 4 | 28 [+] |
| ARL1     | ADP-ribosylation factor-like protein 1                                                                                                                                                                                                                          | 16.2144 | -11.14 | 0.000347 | 335  | 17 | 3 | 47 [+] |
| ASPHD1   | Aspartate beta-hydroxylase domain-containing protein 1 (EC 1.14.11.-)                                                                                                                                                                                           | 15.5375 | -11.54 | 0.000351 | 349  | 18 | 1 | 44 [+] |
| ATAD5    | Chromosome fragility associated gene 1                                                                                                                                                                                                                          | 14.7218 | -19.52 | 0.000379 | 1201 | 21 | 5 | 25 [+] |
| ATOH1    | Protein atonal homolog 1 (Helix-loop-helix protein hATH-1)                                                                                                                                                                                                      | 15.2254 | -18.46 | 0.000421 | 709  | 15 | 1 | 16 [+] |
| ATP13A4  | ATPase type 13A4                                                                                                                                                                                                                                                | 15.9185 | -15.07 | 0.000426 | 205  | 10 | 6 | 35 [+] |
| ATP8A2   | Probable phospholipid-transporting ATPase IB (EC 3.6.3.1) (ATPase class I type 8A member 2) (ML-1)                                                                                                                                                              | 15.2543 | -18.27 | 0.000456 | 652  | 23 | 4 | 48 [+] |
| AXIN2    | Axin-2 (Axis inhibition protein 2) (Conductin) (Axin-like protein) (Axil)                                                                                                                                                                                       | 15.3256 | -11.01 | 0.000483 | 370  | 21 | 7 | 89 [+] |
| B3GNT8   | UDP-GlcNAc:betaGal beta-1,3-N-acetylglucosaminyltransferase 8                                                                                                                                                                                                   | 14.2129 | -13.9  | 0.000507 | 265  | 15 | 2 | 57 [+] |

|        |                                                                                                                                                                                                                                                        |         |        |          |      |    |   |          |
|--------|--------------------------------------------------------------------------------------------------------------------------------------------------------------------------------------------------------------------------------------------------------|---------|--------|----------|------|----|---|----------|
| BACE2  | Beta-secretase 2 precursor (EC 3.4.23.45)<br>(Beta-site APP-cleaving enzyme 2)<br>(Aspartyl protease 1) (Asp 1) (ASP1)<br>(Membrane-associated aspartic protease 1)<br>(Memapsin-1) (Aspartic-like protease 56<br>kDa) (Down region aspartic protease) | 15.3513 | -11.54 | 0.000512 | 389  | 17 | 3 | 39 [ + ] |
| BACE2  | Beta-secretase 2 precursor (EC 3.4.23.45)<br>(Beta-site APP-cleaving enzyme 2)<br>(Aspartyl protease 1) (Asp 1) (ASP1)<br>(Membrane-associated aspartic protease 1)<br>(Memapsin-1) (Aspartic-like protease 56<br>kDa) (Down region aspartic protease) | 14.3212 | -11.19 | 0.000542 | 301  | 19 | 9 | 80 [ + ] |
| BBS5   | Bardet-Biedl syndrome 5 protein                                                                                                                                                                                                                        | 15.9841 | -22.01 | 0.000542 | 1146 | 17 | 3 | 22 [ + ] |
| BCAS3  | Breast carcinoma amplified sequence 3<br>(GAOB1) (Maab1 protein)                                                                                                                                                                                       | 14.2017 | -15.49 | 0.000546 | 1000 | 15 | 3 | 19 [ + ] |
| BCKDK  | [3-Methyl-2-oxobutanoate dehydrogenase<br>[lipoamide]] kinase, mitochondrial<br>precursor (EC 2.7.11.4) (Branched-chain<br>alpha-ketoacid dehydrogenase kinase)<br>(BCKDHKIN) (BCKD-kinase)                                                            | 15.148  | -20.15 | 0.000607 | 1000 | 8  | 1 | 12 [ + ] |
| BCL2A1 | Bcl-2-related protein A1 (Protein BFL-1)<br>(Hemopoietic-specific early response<br>protein) (Protein GRS)                                                                                                                                             | 15.0445 | -15.59 | 0.000611 | 314  | 17 | 8 | 73 [ + ] |
| BCL7C  | B-cell CLL/lymphoma 7 protein family<br>member C                                                                                                                                                                                                       | 14.7644 | -13.28 | 0.000641 | 455  | 20 | 6 | 62 [ + ] |
| BDH1   | D-beta-hydroxybutyrate dehydrogenase,<br>mitochondrial precursor (EC 1.1.1.30)<br>(BDH) (3-hydroxybutyrate dehydrogenase)                                                                                                                              | 15.0183 | -17.04 | 0.000645 | 741  | 16 | 6 | 21 [ + ] |
| BDNF   | Brain-derived neurotrophic factor precursor<br>(BDNF) (Abrineurin)                                                                                                                                                                                     | 15.0088 | -8.72  | 0.000657 | 296  | 16 | 4 | 47 [ + ] |

|       |                                                                                                                                                                                                                             |  |         |        |          |      |    |    |        |
|-------|-----------------------------------------------------------------------------------------------------------------------------------------------------------------------------------------------------------------------------|--|---------|--------|----------|------|----|----|--------|
| BFSP1 | Filensin (Beaded filament structural protein 1) (Lens fiber cell beaded-filament structural protein CP 115) (CP115) (Lens intermediate filament-like heavy) (LIFL-H)                                                        |  | 17.2829 | -21.46 | 0.000657 | 325  | 15 | 11 | 57 [+] |
| BFSP1 | Filensin (Beaded filament structural protein 1) (Lens fiber cell beaded-filament structural protein CP 115) (CP115) (Lens intermediate filament-like heavy) (LIFL-H)                                                        |  | 15.0088 | -13.22 | 0.000657 | 145  | 7  | 1  | 22 [+] |
| BGN   | Biglycan precursor (Bone/cartilage proteoglycan I) (PG-S1)                                                                                                                                                                  |  | 15.7682 | -18.91 | 0.000701 | 744  | 19 | 4  | 23 [+] |
| BID   | BH3-interacting domain death agonist (BID) (p22 BID) [Contains: BH3-interacting domain death agonist p15 (p15 BID); BH3-interacting domain death agonist p13 (p13 BID); BH3-interacting domain death agonist p11 (p11 BID)] |  | 16.33   | -24.71 | 0.000731 | 1000 | 16 | 4  | 22 [+] |
| BIRC8 | Baculoviral IAP repeat-containing protein 8 (Inhibitor of apoptosis- like protein 2) (IAP-like protein 2) (ILP-2) (Testis-specific inhibitor of apoptosis)                                                                  |  | 15.0508 | -16.07 | 0.00074  | 1000 | 13 | 1  | 14 [+] |
| BMP1  | Bone morphogenetic protein 1 precursor (EC 3.4.24.19) (BMP-1) (Procollagen C-proteinase) (PCP) (Mammalian tolloid protein) (mTld)                                                                                           |  | 15.0492 | -16.07 | 0.000743 | 1000 | 12 | 1  | 12 [+] |
| BPHL  | Valacyclovir hydrolase precursor (EC 3.1.-.-) (VACVase) (Biphenyl hydrolase-like protein) (Biphenyl hydrolase-related protein) (Bph-rp) (Breast epithelial mucin-associated antigen) (MCNAA)                                |  | 15.0492 | -16.07 | 0.000743 | 1000 | 13 | 1  | 13 [+] |
| BRCA2 | Breast cancer type 2 susceptibility protein (Fanconi anemia group D1 protein)                                                                                                                                               |  | 16.8281 | -19.58 | 0.00076  | 300  | 18 | 6  | 68 [+] |
| BUB3  | Mitotic checkpoint protein BUB3                                                                                                                                                                                             |  | 14.113  | -17.73 | 0.000765 | 1000 | 15 | 2  | 16 [+] |



|            |                                                                                                                                                                            |  |         |        |          |      |    |   |        |
|------------|----------------------------------------------------------------------------------------------------------------------------------------------------------------------------|--|---------|--------|----------|------|----|---|--------|
| BXDC5      | Ribosome production factor 1 (Ribosome biogenesis protein RPF1) (Brix domain-containing protein 5)                                                                         |  | 15.7321 | -17.61 | 0.000772 | 1000 | 14 | 9 | 20 [+] |
| C10orf65   | Dihydrodipicolinate synthase-like, mitochondrial precursor (EC 4.-.-.) (DHDPS-like protein)                                                                                |  | 15.0291 | -16.07 | 0.000774 | 1000 | 13 | 1 | 12 [+] |
| C10orf97   | CDNA FLJ13397 fis, clone PLACE1001351 (Novel protein) (Chromosome 10 open reading frame 97) (Hypothetical protein DKFZp547B174) (DERP5) (Dermal papilla derived protein 5) |  | 15.9079 | -20.12 | 0.000774 | 440  | 20 | 4 | 44 [+] |
| C11orf2    | Uncharacterized protein C11orf2 (Another new gene 2 protein)                                                                                                               |  | 15.5019 | -18.34 | 0.000818 | 1000 | 18 | 1 | 19 [+] |
| C12orf45   | Uncharacterized protein C12orf45                                                                                                                                           |  | 15.2362 | -10.37 | 0.000829 | 249  | 13 | 9 | 53 [+] |
| C12orf52   | CDNA FLJ14827 fis, clone OVARC1000886 (Chromosome 12 open reading frame 52) (CDNA PSEC0043 fis, clone NT2RP1001002)                                                        |  | 15.2707 | -15.9  | 0.000888 | 689  | 23 | 4 | 33 [+] |
| C12orf62   | Uncharacterized protein C12orf62                                                                                                                                           |  | 14.8823 | -18.39 | 0.000899 | 633  | 17 | 5 | 35 [+] |
| C14orf131  | CDNA FLJ11132 fis, clone PLACE1006335                                                                                                                                      |  | 14.0506 | -17.33 | 0.000912 | 474  | 20 | 3 | 40 [+] |
| C14orf166B | CDNA FLJ43734 fis, clone TESTI2004700                                                                                                                                      |  | 17.0555 | -23.14 | 0.000934 | 276  | 16 | 4 | 57 [+] |
| C14orf167  | Uncharacterized protein C14orf167                                                                                                                                          |  | 14.4383 | -9.54  | 0.000946 | 364  | 20 | 4 | 49 [+] |
| C14orf28   | Uncharacterized protein C14orf28 (Dopamine receptor-interacting protein 1)                                                                                                 |  | 14.1581 | -13.41 | 0.000949 | 1399 | 12 | 3 | 12 [+] |
| C14orf54   | Uncharacterized protein C14orf54                                                                                                                                           |  | 15.3499 | -18.26 | 0.000951 | 209  | 12 | 4 | 41 [+] |
| C14orf54   | Uncharacterized protein C14orf54                                                                                                                                           |  | 15.2456 | -16.07 | 0.000957 | 910  | 17 | 3 | 27 [+] |
| C15orf43   | Uncharacterized protein C15orf43                                                                                                                                           |  | 15.6195 | -10.13 | 0.000966 | 378  | 15 | 2 | 44 [+] |
| C16orf57   | UPF0406 protein C16orf57                                                                                                                                                   |  | 14.8436 | -21.89 | 0.000975 | 1088 | 14 | 6 | 17 [+] |
| C16orf68   | Uncharacterized protein C16orf68                                                                                                                                           |  | 15.4636 | -12.71 | 0.000991 | 185  | 8  | 8 | 41 [+] |
| C18orf22   | Putative ribosome-binding factor A, mitochondrial precursor                                                                                                                |  | 16.9418 | -14.5  | 0.000994 | 154  | 9  | 4 | 30 [+] |

|          |                                                                                  |  |         |        |          |      |    |   |        |
|----------|----------------------------------------------------------------------------------|--|---------|--------|----------|------|----|---|--------|
| C18orf22 | Putative ribosome-binding factor A, mitochondrial precursor                      |  | 14.7765 | -12.92 | 0.001049 | 1775 | 12 | 5 | 12 [+] |
| C19orf29 | Uncharacterized protein C19orf29 (Renal carcinoma antigen NY-REN-24)             |  | 15.3506 | -12.07 | 0.001107 | 539  | 21 | 6 | 55 [+] |
| C1orf162 | Uncharacterized protein C1orf162                                                 |  | 16.7144 | -15.2  | 0.001123 | 108  | 6  | 6 | 21 [+] |
| C1orf162 | Uncharacterized protein C1orf162                                                 |  | 16.071  | -17.23 | 0.001128 | 454  | 20 | 6 | 41 [+] |
| C1orf165 | Coiled-coil domain-containing protein C1orf165                                   |  | 15.0501 | -14.24 | 0.001169 | 699  | 15 | 5 | 29 [+] |
| C1orf50  | Uncharacterized protein C1orf50                                                  |  | 16.0667 | -19.69 | 0.001178 | 1321 | 17 | 5 | 19 [+] |
| C1orf77  | Uncharacterized protein C1orf77                                                  |  | 16.2948 | -21.11 | 0.001202 | 695  | 18 | 4 | 31 [+] |
| C1orf78  | Transmembrane protein C1orf78                                                    |  | 15.7019 | -26.03 | 0.001227 | 1000 | 12 | 1 | 8 [+]  |
| C20orf51 | Putative uncharacterized protein C20orf51                                        |  | 16.2596 | -14.67 | 0.001254 | 230  | 10 | 3 | 39 [+] |
| C20orf71 | Short palate, lung and nasal epithelium carcinoma-associated protein 3 precursor |  | 14.6859 | -16.5  | 0.001267 | 364  | 22 | 1 | 56 [+] |
| C20orf79 | Uncharacterized protein C20orf79                                                 |  | 15.4436 | -15.2  | 0.001303 | 660  | 18 | 5 | 31 [+] |
| C20orf94 | Uncharacterized protein C20orf94                                                 |  | 14.6677 | -14.43 | 0.001315 | 201  | 9  | 1 | 27 [+] |
| C3orf15  | AMY-1-associating protein expressed in testis 1 (AAT-1)                          |  | 15.5849 | -14.67 | 0.001335 | 448  | 16 | 1 | 31 [+] |
| C3orf23  | Uncharacterized protein C3orf23                                                  |  | 14.6511 | -14.43 | 0.001359 | 303  | 17 | 6 | 54 [+] |
| C4orf26  | Uncharacterized protein C4orf26                                                  |  | 14.4524 | -10.08 | 0.001395 | 342  | 18 | 4 | 54 [+] |
| C6orf206 | Uncharacterized protein C6orf206                                                 |  | 14.6317 | -12.99 | 0.001414 | 1013 | 6  | 1 | 5 [+]  |
| C6orf94  | UPF0418 protein C6orf94                                                          |  | 15.3506 | -13.49 | 0.001442 | 614  | 17 | 6 | 28 [+] |
| C7orf33  | Uncharacterized protein C7orf33                                                  |  | 15.5988 | -12.29 | 0.001456 | 495  | 25 | 7 | 68 [+] |
| C8orf40  | Uncharacterized protein C8orf40                                                  |  | 15.9619 | -16.97 | 0.001468 | 332  | 16 | 1 | 32 [+] |
| C8orf48  | Uncharacterized protein C8orf48                                                  |  | 14.6079 | -13.93 | 0.001483 | 311  | 16 | 1 | 40 [+] |
| C9orf133 | NOT ANNOTATED                                                                    |  | 14.7018 | -18.87 | 0.001502 | 1000 | 20 | 1 | 19 [+] |
| C9orf78  | Uncharacterized protein C9orf78 (Hepatocellular carcinoma-associated antigen 59) |  | 14.654  | -19.35 | 0.001521 | 1000 | 18 | 5 | 33 [+] |
| C9orf85  | Uncharacterized protein C9orf85                                                  |  | 15.8047 | -14.65 | 0.001583 | 260  | 11 | 2 | 33 [+] |
| C9orf86  | Putative GTP-binding protein Parf (Partner of ARF)                               |  | 16.5982 | -13.54 | 0.001598 | 406  | 18 | 5 | 45 [+] |

|        |                                                                                                                                                                                                                                                                 |         |        |          |      |    |   |        |
|--------|-----------------------------------------------------------------------------------------------------------------------------------------------------------------------------------------------------------------------------------------------------------------|---------|--------|----------|------|----|---|--------|
| CA8    | Carbonic anhydrase-related protein (CARP) (CA-VIII)                                                                                                                                                                                                             | 15.7656 | -19.11 | 0.00161  | 794  | 18 | 5 | 31 [+] |
| CADPS  | Calcium-dependent secretion activator 1 (Calcium-dependent activator protein for secretion 1) (CAPS-1)                                                                                                                                                          | 14.5653 | -16.82 | 0.001616 | 420  | 14 | 1 | 28 [+] |
| CALML5 | Calmodulin-like protein 5 (Calmodulin-like skin protein)                                                                                                                                                                                                        | 15.0091 | -16.03 | 0.001633 | 584  | 25 | 4 | 52 [+] |
| CALML5 | Calmodulin-like protein 5 (Calmodulin-like skin protein)                                                                                                                                                                                                        | 14.5577 | -16.82 | 0.00164  | 422  | 14 | 1 | 28 [+] |
| CAPZA2 | F-actin capping protein subunit alpha-2 (CapZ alpha-2)                                                                                                                                                                                                          | 15.0018 | -14.88 | 0.001648 | 1000 | 11 | 3 | 13 [+] |
| CARS   | Cysteine-tRNA synthetase, cytoplasmic (EC 6.1.1.16) (Cysteine--tRNA ligase) (CARS)                                                                                                                                                                              | 14.554  | -14.63 | 0.001653 | 216  | 11 | 1 | 39 [+] |
| CASP10 | Caspase-10 precursor (EC 3.4.22.63) (CASP-10) (ICE-like apoptotic protease 4) (Apoptotic protease Mch-4) (FAS-associated death domain protein interleukin-1B-converting enzyme 2) (FLICE2) [Contains: Caspase-10 subunit p23/17; Caspase-10 subunit p12]        | 15.1718 | -12.7  | 0.001686 | 602  | 24 | 6 | 52 [+] |
| CAST   | Calpastatin (Calpain inhibitor) (Sperm BS-17 component)                                                                                                                                                                                                         | 15.0511 | -13.85 | 0.001715 | 408  | 17 | 2 | 34 [+] |
| CAST   | Calpastatin (Calpain inhibitor) (Sperm BS-17 component)                                                                                                                                                                                                         | 14.0992 | -8.95  | 0.001721 | 184  | 10 | 9 | 52 [+] |
| CBWD6  | COBW domain-containing protein 6                                                                                                                                                                                                                                | 15.8033 | -19.26 | 0.001723 | 363  | 20 | 6 | 63 [+] |
| CBX6   | Chromobox protein homolog 6                                                                                                                                                                                                                                     | 15.1749 | -23.64 | 0.001731 | 1000 | 17 | 4 | 20 [+] |
| CCL3   | Small inducible cytokine A3 precursor (CCL3) (Macrophage inflammatory protein 1-alpha) (MIP-1-alpha) (Tonsillar lymphocyte LD78 alpha protein) (G0/G1 switch regulatory protein 19-1) (G0S19-1 protein) (SIS-beta) (PAT 464.1) [Contains: MIP-1-alpha(4-69) (LD | 15.6019 | -23.8  | 0.001739 | 1000 | 21 | 2 | 29 [+] |

|         |                                                                                                                                                      |  |         |        |          |      |    |   |        |
|---------|------------------------------------------------------------------------------------------------------------------------------------------------------|--|---------|--------|----------|------|----|---|--------|
| CCM2    | Malcavernin (Cerebral cavernous malformations 2 protein)                                                                                             |  | 14.9741 | -13.72 | 0.001798 | 1097 | 22 | 9 | 27 [+] |
| CCM2    | Malcavernin (Cerebral cavernous malformations 2 protein)                                                                                             |  | 15.0088 | -9.11  | 0.001801 | 227  | 11 | 7 | 49 [+] |
| CCNDBP1 | Cyclin D-type binding-protein 1 isoform 1                                                                                                            |  | 14.7139 | -11.84 | 0.001805 | 538  | 23 | 5 | 49 [+] |
| CCT3    | T-complex protein 1 subunit gamma (TCP-1-gamma) (CCT-gamma) (hTRiC5)                                                                                 |  | 16.1172 | -12.58 | 0.001814 | 1000 | 17 | 7 | 23 [+] |
| CD164L2 | CD164 sialomucin-like 2 protein precursor                                                                                                            |  | 16.1459 | -15.03 | 0.001817 | 241  | 14 | 4 | 51 [+] |
| CD34    | Hematopoietic progenitor cell antigen CD34 precursor                                                                                                 |  | 14.5038 | -8.63  | 0.001828 | 355  | 18 | 1 | 41 [+] |
| CD34    | Hematopoietic progenitor cell antigen CD34 precursor                                                                                                 |  | 14.5032 | -18.35 | 0.00183  | 1107 | 15 | 7 | 16 [+] |
| CD55    | Complement decay-accelerating factor precursor (CD55 antigen)                                                                                        |  | 17.8514 | -20.15 | 0.001862 | 262  | 13 | 1 | 30 [+] |
| CD55    | Complement decay-accelerating factor precursor (CD55 antigen)                                                                                        |  | 17.1023 | -20.73 | 0.001879 | 1000 | 15 | 2 | 15 [+] |
| CD55    | Complement decay-accelerating factor precursor (CD55 antigen)                                                                                        |  | 14.6435 | -9.73  | 0.001887 | 421  | 18 | 2 | 40 [+] |
| CD6     | T-cell differentiation antigen CD6 precursor (T12) (TP120)                                                                                           |  | 17.0144 | -23.81 | 0.00189  | 758  | 16 | 1 | 27 [+] |
| CD69    | Early activation antigen CD69 (Early T-cell activation antigen p60) (GP32/28) (Leu-23) (MLR-3) (EA1) (BL-AC/P26) (Activation inducer molecule) (AIM) |  | 14.4789 | -16.31 | 0.001921 | 314  | 17 | 1 | 41 [+] |
| CD9     | CD9 antigen (p24) (Leukocyte antigen MIC3) (Motility-related protein) (MRP-1) (Tetraspanin-29) (Tspan-29)                                            |  | 15.2362 | -21.31 | 0.001922 | 198  | 12 | 2 | 46 [+] |
| CDADC1  | Cytidine and dCMP deaminase domain containing 1                                                                                                      |  | 16.4745 | -15.08 | 0.001923 | 302  | 16 | 7 | 48 [+] |
| CDADC1  | Cytidine and dCMP deaminase domain containing 1                                                                                                      |  | 14.7212 | -17.88 | 0.001958 | 1386 | 6  | 2 | 5 [+]  |

|            |                                                                                                                                                                                                             |  |         |        |          |      |    |   |        |
|------------|-------------------------------------------------------------------------------------------------------------------------------------------------------------------------------------------------------------|--|---------|--------|----------|------|----|---|--------|
| CDC34      | Ubiquitin-conjugating enzyme E2 R1 (EC 6.3.2.19) (Ubiquitin-protein ligase R1) (Ubiquitin-conjugating enzyme E2-32 kDa complementing) (E2- CDC34)                                                           |  | 15.0124 | -10.39 | 0.001972 | 320  | 16 | 5 | 52 [+] |
| CDK4       | Cell division protein kinase 4 (EC 2.7.11.22) (Cyclin-dependent kinase 4) (CDK4)                                                                                                                            |  | 14.5215 | -11.34 | 0.001976 | 403  | 19 | 6 | 64 [+] |
| CDR1       | Cerebellar degeneration-related protein 1, 34kDa                                                                                                                                                            |  | 14.4633 | -9.73  | 0.001982 | 441  | 17 | 6 | 54 [+] |
| CDY2_HUMAN | Testis-specific chromodomain protein Y 2                                                                                                                                                                    |  | 14.8018 | -19.01 | 0.001989 | 1000 | 15 | 1 | 19 [+] |
| CEACAM21   | Carcinoembryonic antigen-related cell adhesion molecule                                                                                                                                                     |  | 17.7849 | -22.1  | 0.001997 | 1000 | 15 | 1 | 17 [+] |
| CEACAM3    | Carcinoembryonic antigen-related cell adhesion molecule 3 precursor (Carcinoembryonic antigen CGM1) (CD66d antigen)                                                                                         |  | 14.4561 | -13.38 | 0.002011 | 450  | 16 | 5 | 41 [+] |
| CEACAM3    | Carcinoembryonic antigen-related cell adhesion molecule 3 precursor (Carcinoembryonic antigen CGM1) (CD66d antigen)                                                                                         |  | 14.4403 | -10.67 | 0.002075 | 280  | 16 | 2 | 68 [+] |
| CEACAM4    | carcinoembryonic antigen-related cell adhesion molecule 4                                                                                                                                                   |  | 14.4403 | -10.67 | 0.002075 | 273  | 16 | 1 | 59 [+] |
| CENPI      | Centromere protein I (CENP-I) (Interphase centromere complex protein 19) (Follicle-stimulating hormone primary response protein) (FSH primary response protein 1) (Leucine-rich primary response protein 1) |  | 14.4403 | -20.26 | 0.002075 | 171  | 10 | 1 | 28 [+] |
| CENPI      | Centromere protein I (CENP-I) (Interphase centromere complex protein 19) (Follicle-stimulating hormone primary response protein) (FSH primary response protein 1) (Leucine-rich primary response protein 1) |  | 14.9553 | -20.27 | 0.002116 | 646  | 23 | 1 | 32 [+] |

|        |                                                                                                                                                                               |  |         |        |          |      |    |   |        |
|--------|-------------------------------------------------------------------------------------------------------------------------------------------------------------------------------|--|---------|--------|----------|------|----|---|--------|
| CENPL  | Centromere protein L (CENP-L)<br>(Interphase centromere complex protein 33)                                                                                                   |  | 15.0944 | -17.99 | 0.002129 | 839  | 13 | 1 | 18 [+] |
| CHRNA3 | Neuronal acetylcholine receptor subunit<br>beta-3 precursor                                                                                                                   |  | 14.4273 | -13.61 | 0.002129 | 399  | 18 | 7 | 39 [+] |
| CHRND  | Acetylcholine receptor subunit delta<br>precursor                                                                                                                             |  | 14.4264 | -13.88 | 0.002133 | 745  | 17 | 6 | 25 [+] |
| CIDEA  | Cell death activator CIDE-A (Cell death-<br>inducing DFFA-like effector A)                                                                                                    |  | 14.948  | -20.27 | 0.002145 | 649  | 27 | 6 | 51 [+] |
| CKB    | Creatine kinase B-type (EC 2.7.3.2)<br>(Creatine kinase B chain) (B-CK)                                                                                                       |  | 15.0904 | -17.99 | 0.002145 | 841  | 19 | 3 | 28 [+] |
| CLASP1 | CLIP-associating protein 1 (Cytoplasmic<br>linker-associated protein 1) (Multiple asters<br>homolog 1) (hOrbit1)                                                              |  | 14.4199 | -18.6  | 0.002161 | 1534 | 13 | 5 | 15 [+] |
| CLEC2D | Osteoclast inhibitory lectin isoform 1                                                                                                                                        |  | 14.9444 | -19.63 | 0.002203 | 1000 | 8  | 1 | 8 [+]  |
| CLU10S | Chronic lymphocytic leukem+C235ia up-<br>regulated 1 opposite strand                                                                                                          |  | 14.4017 | -16.05 | 0.002241 | 1000 | 20 | 5 | 28 [+] |
| CLOCK  | Circadian locomoter output cycles protein<br>kaput (hCLOCK)                                                                                                                   |  | 16.0322 | -13.23 | 0.002243 | 267  | 14 | 1 | 36 [+] |
| CMTM1  | CKLF-like MARVEL transmembrane<br>domain-containing protein 1 (Chemokine-<br>like factor superfamily member 1)                                                                |  | 15.3344 | -17.98 | 0.002258 | 1000 | 13 | 2 | 13 [+] |
| CNOT4  | CCR4-NOT transcription complex subunit<br>4 (EC 6.3.2.-) (E3 ubiquitin protein ligase<br>CNOT4) (CCR4-associated factor 4)<br>(Potential transcriptional repressor<br>NOT4Hp) |  | 17.6361 | -17.58 | 0.002336 | 334  | 18 | 1 | 53 [+] |
| CNOT4  | CCR4-NOT transcription complex subunit<br>4 (EC 6.3.2.-) (E3 ubiquitin protein ligase<br>CNOT4) (CCR4-associated factor 4)<br>(Potential transcriptional repressor<br>NOT4Hp) |  | 14.2949 | -16.8  | 0.002339 | 434  | 23 | 5 | 84 [+] |
| COG6   | Conserved oligomeric Golgi complex<br>component 6                                                                                                                             |  | 15.7854 | -20.25 | 0.002371 | 1164 | 17 | 6 | 17 [+] |

|         |                                                                                                                                                                                                                                            |  |         |        |          |      |    |   |        |
|---------|--------------------------------------------------------------------------------------------------------------------------------------------------------------------------------------------------------------------------------------------|--|---------|--------|----------|------|----|---|--------|
| COL9A2  | Collagen alpha-2(IX) chain precursor                                                                                                                                                                                                       |  | 14.3697 | -12.97 | 0.002388 | 586  | 14 | 1 | 22 [+] |
| COL9A2  | Collagen alpha-2(IX) chain precursor                                                                                                                                                                                                       |  | 15.1225 | -11.02 | 0.002392 | 286  | 18 | 5 | 53 [+] |
| COX7A2  | Cytochrome c oxidase polypeptide VIIa-liver/heart, mitochondrial precursor (EC 1.9.3.1) (Cytochrome c oxidase subunit VIIa-L) (VIIaL)                                                                                                      |  | 16.0322 | -12.9  | 0.00246  | 244  | 15 | 4 | 57 [+] |
| COX7A2  | Cytochrome c oxidase polypeptide VIIa-liver/heart, mitochondrial precursor (EC 1.9.3.1) (Cytochrome c oxidase subunit VIIa-L) (VIIaL)                                                                                                      |  | 14.3502 | -19.08 | 0.002482 | 841  | 24 | 7 | 33 [+] |
| COX7A2  | Cytochrome c oxidase polypeptide VIIa-liver/heart, mitochondrial precursor (EC 1.9.3.1) (Cytochrome c oxidase subunit VIIa-L) (VIIaL)                                                                                                      |  | 14.7937 | -15.43 | 0.002498 | 1189 | 10 | 1 | 8 [+]  |
| COX8A   | Cytochrome c oxidase polypeptide VIII-liver/heart, mitochondrial precursor (EC 1.9.3.1) (Cytochrome c oxidase subunit 8- $\alpha$ )                                                                                                        |  | 14.3679 | -14.37 | 0.002512 | 659  | 17 | 5 | 31 [+] |
| CPNE2   | Copine-2 (Copine II)                                                                                                                                                                                                                       |  | 14.0417 | -18.67 | 0.002518 | 1663 | 6  | 3 | 7 [+]  |
| CPXM2   | Carboxypeptidase-like protein X2 precursor                                                                                                                                                                                                 |  | 14.337  | -15.91 | 0.002548 | 499  | 17 | 1 | 33 [+] |
| CREB3L4 | cAMP responsive element binding protein 3-like 4                                                                                                                                                                                           |  | 15.5878 | -20.57 | 0.002571 | 644  | 12 | 1 | 14 [+] |
| CRLS1   | Cardiolipin synthetase (EC 2.7.8.-) (Cardiolipin synthase) (CLS) (Protein GCD10 homolog)                                                                                                                                                   |  | 17.5357 | -21.68 | 0.002597 | 981  | 13 | 1 | 15 [+] |
| CRSP9   | Cofactor required for Sp1 transcriptional activation subunit 9 (Transcriptional coactivator CRSP33) (RNA polymerase transcriptional regulation mediator subunit 7 homolog) (hMED7) (Activator-recruited cofactor 34 kDa component) (ARC34) |  | 15.1225 | -12.74 | 0.002601 | 163  | 9  | 1 | 29 [+] |
| CRTAC1  | Cartilage acidic protein 1 precursor (68 kDa chondrocyte-expressed protein) (CEP-68) (ASPIC)                                                                                                                                               |  | 14.4714 | -15.98 | 0.002628 | 1000 | 10 | 1 | 12 [+] |

|         |                                                                                                                                                                              |  |         |        |          |      |    |   |        |
|---------|------------------------------------------------------------------------------------------------------------------------------------------------------------------------------|--|---------|--------|----------|------|----|---|--------|
| CSAG2   | Melanoma-associated antigen 12 (MAGE-12 antigen) (MAGE12F)                                                                                                                   |  | 15.1807 | -19.06 | 0.002628 | 1071 | 9  | 1 | 12 [+] |
| CSAG2   | Melanoma-associated antigen 12 (MAGE-12 antigen) (MAGE12F)                                                                                                                   |  | 14.7527 | -10.54 | 0.002646 | 374  | 22 | 6 | 64 [+] |
| CSNK1G1 | Casein kinase I isoform gamma-1 (EC 2.7.11.1) (CKI-gamma 1)                                                                                                                  |  | 17.5103 | -14.01 | 0.002668 | 157  | 9  | 7 | 26 [+] |
| CTAG1A  | Cancer/testis antigen 1B (L antigen family member 2) (LAGE-2 protein) (Autoimmunogenic cancer/testis antigen NY-ESO-1)                                                       |  | 17.5103 | -17.97 | 0.002668 | 198  | 11 | 1 | 37 [+] |
| CTAG1B  | Cancer/testis antigen 1B (L antigen family member 2) (LAGE-2 protein) (Autoimmunogenic cancer/testis antigen NY-ESO-1)                                                       |  | 14.0347 | -15.15 | 0.002674 | 899  | 19 | 4 | 30 [+] |
| CTAG2   | Cancer/testis antigen 2 (L antigen family member 1) (LAGE-1 protein) (ESO-2 protein)                                                                                         |  | 15.5773 | -10.69 | 0.002692 | 250  | 15 | 4 | 55 [+] |
| CTAG2   | Cancer/testis antigen 2 (L antigen family member 1) (LAGE-1 protein) (ESO-2 protein)                                                                                         |  | 15.1381 | -18.31 | 0.002702 | 1043 | 9  | 1 | 10 [+] |
| CTSZ    | Cathepsin Z precursor (EC 3.4.22.-) (Cathepsin X) (Cathepsin P)                                                                                                              |  | 14.9084 | -16.25 | 0.002721 | 364  | 18 | 5 | 51 [+] |
| CXCR6   | C-X-C chemokine receptor type 6 (CXC-R6) (CXCR-6) (G-protein coupled receptor bonzo) (G-protein coupled receptor STRL33) (CD186 antigen) (CDw186)                            |  | 15.1018 | -15.63 | 0.002732 | 1000 | 12 | 1 | 13 [+] |
| CXXC5   | CXXC finger 5                                                                                                                                                                |  | 15.0145 | -20.16 | 0.002744 | 812  | 18 | 1 | 19 [+] |
| CYP3A4  | Cytochrome P450 3A4 (EC 1.14.13.67) (Quinine 3-monooxygenase) (CYP3A4) (Nifedipine oxidase) (Taurochenodeoxycholate 6-alpha-hydroxylase) (EC 1.14.13.97) (NF-25) (P450-PCN1) |  | 15.5773 | -14.37 | 0.002788 | 314  | 13 | 1 | 32 [+] |



|         |                                                                                                                                                                    |  |         |        |          |      |    |   |        |
|---------|--------------------------------------------------------------------------------------------------------------------------------------------------------------------|--|---------|--------|----------|------|----|---|--------|
| CYP4A11 | Cytochrome P450 4A11 precursor (EC 1.14.15.3) (CYP1VA11) (Fatty acid omega-hydroxylase) (P-450 HK omega) (Lauric acid omega-hydroxylase) (CYP4AII) (P450-HL-omega) |  | 14.8951 | -15.78 | 0.002788 | 270  | 13 | 1 | 40 [+] |
| CYP4X1  | Cytochrome P450 4X1 (EC 1.14.14.1) (CYP1VX1)                                                                                                                       |  | 14.3877 | -12.93 | 0.002812 | 1000 | 15 | 5 | 18 [+] |
| CYP4X1  | Cytochrome P450 4X1 (EC 1.14.14.1) (CYP1VX1)                                                                                                                       |  | 14.7011 | -16.17 | 0.002813 | 725  | 24 | 3 | 28 [+] |
| DAOA    | D-amino acid oxidase activator (Protein G72)                                                                                                                       |  | 17.4541 | -22.55 | 0.00283  | 1567 | 3  | 1 | 4 [+]  |
| DARS2   | Aspartyl-tRNA synthetase, mitochondrial precursor (EC 6.1.1.12) (Aspartate--tRNA ligase) (AspRS)                                                                   |  | 14.0992 | -15.03 | 0.00284  | 212  | 11 | 6 | 41 [+] |
| DARS2   | Aspartyl-tRNA synthetase, mitochondrial precursor (EC 6.1.1.12) (Aspartate--tRNA ligase) (AspRS)                                                                   |  | 15.2221 | -15.88 | 0.00285  | 323  | 17 | 1 | 43 [+] |
| DAXX    | Death domain-associated protein 6 (Daxx) (hDaxx) (Fas death domain- associated protein) (ETS1-associated protein 1) (EAP1)                                         |  | 17.4454 | -22.55 | 0.002856 | 1575 | 9  | 8 | 11 [+] |
| DAXX    | Death domain-associated protein 6 (Daxx) (hDaxx) (Fas death domain- associated protein) (ETS1-associated protein 1) (EAP1)                                         |  | 15.1829 | -16.84 | 0.002864 | 1000 | 16 | 1 | 14 [+] |
| DDB2    | DNA damage-binding protein 2 (Damage-specific DNA-binding protein 2) (DDB p48 subunit) (DDBb) (UV-damaged DNA-binding protein 2) (UV-DDB 2)                        |  | 16.2092 | -15.62 | 0.002923 | 371  | 18 | 2 | 63 [+] |
| DDEFL1  | Development and differentiation-enhancing factor-like 1 (Protein up- regulated in liver cancer 1)                                                                  |  | 15.6609 | -16.07 | 0.002942 | 1605 | 7  | 3 | 7 [+]  |

|         |                                                                                                                                                                                             |         |        |          |      |    |   |        |
|---------|---------------------------------------------------------------------------------------------------------------------------------------------------------------------------------------------|---------|--------|----------|------|----|---|--------|
| DDOST   | Diphospho-oligosaccharide-4-epimerase protein glycosyltransferase 48 kDa subunit precursor (EC 2.4.1.119) (Oligosaccharyl transferase 48 kDa subunit) (DDOST 48 kDa subunit)                | 14.8228 | -17.2  | 0.002959 | 335  | 16 | 1 | 58 [+] |
| DEFA4   | Neutrophil defensin 4 precursor (HNP-4) (HP-4) (Defensin, alpha 4)                                                                                                                          | 15.3843 | -18.64 | 0.002959 | 335  | 18 | 1 | 49 [+] |
| DEFA4   | Neutrophil defensin 4 precursor (HNP-4) (HP-4) (Defensin, alpha 4)                                                                                                                          | 14.5562 | -17.88 | 0.002968 | 556  | 15 | 1 | 17 [+] |
| DEFB128 | Beta-defensin 128 precursor (Defensin, beta 128) (Beta-defensin 28) (DEFB-28)                                                                                                               | 15.1216 | -20.38 | 0.002984 | 1000 | 14 | 3 | 17 [+] |
| DENND1C | DENN/MADD domain containing 1C                                                                                                                                                              | 14.2566 | -18.01 | 0.002987 | 336  | 17 | 1 | 50 [+] |
| DGAT2L3 | Acyl-CoA wax alcohol acyltransferase 1 (EC 2.3.1.75) (Long-chain- alcohol O-fatty-acyltransferase 1) (Diacylglycerol O-acyltransferase 2-like protein 3) (Diacylglycerol acyltransferase 2) | 14.0459 | -17.14 | 0.002989 | 1000 | 15 | 8 | 21 [+] |
| DGKH    | Diacylglycerol kinase eta (EC 2.7.1.107) (Diglyceride kinase eta) (DGK-eta) (DAG kinase eta)                                                                                                | 14.2562 | -10.24 | 0.002989 | 727  | 20 | 1 | 30 [+] |
| DHDDS   | Dehydrodolichyl diphosphate synthase (EC 2.5.1.-) (Dedol-PP synthase)                                                                                                                       | 14.7018 | -12.83 | 0.003001 | 1000 | 16 | 2 | 17 [+] |
| DHRS1   | Dehydrogenase/reductase SDR family member 1 (EC 1.1.-.-)                                                                                                                                    | 15.0219 | -14.01 | 0.003025 | 579  | 23 | 4 | 54 [+] |
| DLEU7   | Leukemia-associated protein 7 (Deleted in lymphocytic leukemia 7)                                                                                                                           | 14.3968 | -18.04 | 0.00303  | 501  | 21 | 5 | 50 [+] |
| DLL3    | Delta-like protein 3 precursor (Drosophila Delta homolog 3)                                                                                                                                 | 14.879  | -12.37 | 0.003063 | 1133 | 19 | 8 | 22 [+] |
| DMXL2   | Protein DmX-like 2 (Rabconnectin-3)                                                                                                                                                         | 14.7524 | -15.87 | 0.003075 | 535  | 21 | 5 | 41 [+] |
| DNAH11  | Ciliary dynein heavy chain 11 (Axonemal beta dynein heavy chain 11)                                                                                                                         | 15.2751 | -18.97 | 0.003079 | 1160 | 16 | 5 | 23 [+] |
| DNAH2   | dynein heavy chain domain 3                                                                                                                                                                 | 15.7058 | -18.97 | 0.003084 | 957  | 7  | 6 | 10 [+] |
| DNAH8   | Ciliary dynein heavy chain 8 (Axonemal beta dynein heavy chain 8)                                                                                                                           | 15.2154 | -10.79 | 0.00315  | 481  | 19 | 8 | 46 [+] |

|         |                                                                                                                                                                    |         |        |          |      |    |   |        |
|---------|--------------------------------------------------------------------------------------------------------------------------------------------------------------------|---------|--------|----------|------|----|---|--------|
| DPYD    | Dihydropyrimidine dehydrogenase [NADP+] precursor (EC 1.3.1.2) (DPD) (DHPDHase) (Dihydrouracil dehydrogenase) (Dihydrothymine dehydrogenase)                       | 15.0539 | -15.21 | 0.003158 | 782  | 22 | 4 | 27 [+] |
| DTD1    | Probable D-tyrosyl-tRNA(Tyr) deacylase 1 (EC 3.1.-.-)                                                                                                              | 14.1921 | -11.41 | 0.003163 | 534  | 20 | 5 | 35 [+] |
| DUSP23  | Dual specificity protein phosphatase 23 (EC 3.1.3.48) (EC 3.1.3.16) (Low molecular mass dual specificity phosphatase 3) (LDP-3) (VH1-like phosphatase Z)           | 14.3263 | -12.93 | 0.003172 | 1000 | 9  | 1 | 10 [+] |
| DYDC1   | DPY30 domain-containing protein 1                                                                                                                                  | 14.563  | -19.16 | 0.003201 | 1110 | 17 | 4 | 20 [+] |
| DYNC2H1 | dynein, cytoplasmic, heavy polypeptide 2                                                                                                                           | 17.3343 | -17.58 | 0.003211 | 390  | 20 | 1 | 47 [+] |
| DYNLT1  | Dynein light chain Tctex-type 1 (T-complex testis-specific protein 1 homolog) (Protein CW-1)                                                                       | 15.0649 | -14.51 | 0.003238 | 959  | 13 | 1 | 12 [+] |
| EDA     | Ectodysplaslin-A (Ectodermal dysplasia protein) (EDA protein) [Contains: Ectodysplaslin-A, membrane form; Ectodysplaslin-A, secreted form]                         | 14.554  | -9.21  | 0.003242 | 229  | 11 | 4 | 48 [+] |
| EDG6    | Sphingosine 1-phosphate receptor Edg-6 (S1P receptor Edg-6) (Endothelial differentiation G-protein coupled receptor 6) (Sphingosine 1-phosphate receptor 4) (S1P4) | 15.2641 | -14.6  | 0.003247 | 1000 | 10 | 1 | 11 [+] |
| EEFSEC  | Selenocysteine-specific elongation factor (Elongation factor sec) (Eukaryotic elongation factor, selenocysteine-tRNA-specific)                                     | 14.2129 | -14.92 | 0.003255 | 184  | 10 | 3 | 39 [+] |
| EFNA4   | Ephrin-A4 precursor (EPH-related receptor tyrosine kinase ligand 4) (LERK-4)                                                                                       | 14.2129 | -16.78 | 0.003255 | 270  | 14 | 7 | 62 [+] |

|        |                                                                                                                                                                                                                                                                |         |        |          |      |    |   |        |
|--------|----------------------------------------------------------------------------------------------------------------------------------------------------------------------------------------------------------------------------------------------------------------|---------|--------|----------|------|----|---|--------|
| EHMT2  | Histone-lysine N-methyltransferase, H3 lysine-9 specific 3 (EC 2.1.1.43) (Histone H3-K9 methyltransferase 3) (H3-K9-HMTase 3) (Euchromatic histone-lysine N-methyltransferase 2) (HLA-B-associated transcript 8) (Protein G9a)                                 | 14.2129 | -5.57  | 0.003255 | 219  | 11 | 1 | 31 [+] |
| EHMT2  | Histone-lysine N-methyltransferase, H3 lysine-9 specific 3 (EC 2.1.1.43) (Histone H3-K9 methyltransferase 3) (H3-K9-HMTase 3) (Euchromatic histone-lysine N-methyltransferase 2) (HLA-B-associated transcript 8) (Protein G9a)                                 | 14.2129 | -17.05 | 0.003255 | 146  | 7  | 5 | 24 [+] |
| EIF2S1 | Eukaryotic translation initiation factor 2 subunit 1 (Eukaryotic translation initiation factor 2 subunit alpha) (eIF-2-alpha) (EIF-2alpha) (EIF-2A)                                                                                                            | 14.2098 | -10.67 | 0.003275 | 346  | 20 | 1 | 55 [+] |
| EMG1   | Probable ribosome biogenesis protein NEP1 (Nucleolar protein EMG1 homolog) (Protein C2f)                                                                                                                                                                       | 14.2094 | -14.74 | 0.003277 | 1000 | 11 | 1 | 13 [+] |
| EML5   | Echinoderm microtubule-associated protein-like 5 (EMAP-5)                                                                                                                                                                                                      | 17.3132 | -22.55 | 0.003283 | 1723 | 3  | 1 | 3 [+]  |
| ENPP1  | Ectonucleotide pyrophosphatase/phosphodiesterase family member 1 (E- NPP 1) (Phosphodiesterase I/nucleotide pyrophosphatase 1) (Plasma-cell membrane glycoprotein PC-1) [Includes: Alkaline phosphodiesterase I (EC 3.1.4.1); Nucleotide pyrophosphatase (EC 3 | 14.2079 | -14.79 | 0.003287 | 1000 | 16 | 4 | 20 [+] |
| ERCC5  | DNA-repair protein complementing XP-G cells (Xeroderma pigmentosum group G-complementing protein) (DNA excision repair protein ERCC-5)                                                                                                                         | 15.2362 | -14.61 | 0.003289 | 189  | 9  | 7 | 29 [+] |

|         |                                                                                                                                        |         |        |          |      |    |    |        |
|---------|----------------------------------------------------------------------------------------------------------------------------------------|---------|--------|----------|------|----|----|--------|
| ERCC5   | DNA-repair protein complementing XP-G cells (Xeroderma pigmentosum group G-complementing protein) (DNA excision repair protein ERCC-5) | 15.2616 | -14.47 | 0.003351 | 790  | 22 | 3  | 28 [+] |
| ERCC5   | DNA-repair protein complementing XP-G cells (Xeroderma pigmentosum group G-complementing protein) (DNA excision repair protein ERCC-5) | 15.761  | -14.78 | 0.003393 | 349  | 19 | 5  | 58 [+] |
| ERCC5   | DNA-repair protein complementing XP-G cells (Xeroderma pigmentosum group G-complementing protein) (DNA excision repair protein ERCC-5) | 14.5294 | -8.19  | 0.003404 | 401  | 19 | 2  | 41 [+] |
| ERP29   | Endoplasmic reticulum protein ERp29 precursor (ERp31) (ERp28)                                                                          | 16.9312 | -16.07 | 0.003406 | 320  | 13 | 1  | 47 [+] |
| ESR2    | Estrogen receptor beta (ER-beta)                                                                                                       | 14.2718 | -10.54 | 0.003413 | 583  | 18 | 1  | 29 [+] |
| ESR2    | Estrogen receptor beta (ER-beta)                                                                                                       | 17.276  | -26.36 | 0.003415 | 603  | 18 | 1  | 28 [+] |
| EXOD1   | Exonuclease domain containing 1                                                                                                        | 15.0112 | -17.81 | 0.003417 | 418  | 21 | 1  | 52 [+] |
| EXOD1   | Exonuclease domain containing 1                                                                                                        | 14.8835 | -11.14 | 0.003424 | 553  | 21 | 7  | 29 [+] |
| EXOSC1  | 3'-5' Exoribonuclease CSL4 homolog (EC 3.1.13.-) (Exosome component 1)                                                                 | 14.1865 | -14.74 | 0.003428 | 1000 | 12 | 1  | 12 [+] |
| EXOSC1  | 3'-5' Exoribonuclease CSL4 homolog (EC 3.1.13.-) (Exosome component 1)                                                                 | 14.1862 | -11.2  | 0.00343  | 305  | 17 | 5  | 52 [+] |
| FAM105A | Protein FAM105A                                                                                                                        | 14.8951 | -9.58  | 0.003432 | 269  | 16 | 10 | 65 [+] |
| FAM120A | UPF0318 protein FAM120A                                                                                                                | 14.185  | -19.92 | 0.003438 | 943  | 7  | 1  | 8 [+]  |
| FAM120A | UPF0318 protein FAM120A                                                                                                                | 15.114  | -17.36 | 0.003441 | 1000 | 18 | 8  | 22 [+] |
| FAM120A | UPF0318 protein FAM120A                                                                                                                | 14.9304 | -27.64 | 0.003444 | 1000 | 10 | 1  | 12 [+] |
| FAM3D   | Protein FAM3D precursor                                                                                                                | 14.1824 | -10.62 | 0.003455 | 719  | 19 | 1  | 20 [+] |
| FAM46D  | Protein FAM46D                                                                                                                         | 14.5849 | -13.21 | 0.00346  | 718  | 19 | 3  | 28 [+] |
| FAM55C  | family with sequence similarity 55, member C (FAM55C), mRNA                                                                            | 15.4636 | -11.46 | 0.003461 | 133  | 8  | 4  | 28 [+] |
| FAM70B  | Protein FAM70B                                                                                                                         | 14.5017 | -18.02 | 0.003487 | 1000 | 17 | 7  | 21 [+] |
| FAM80B  | Ribosomal protein S6 modification-like protein B                                                                                       | 14.6047 | -13.01 | 0.003501 | 1372 | 17 | 4  | 24 [+] |

|        |                                                                                                                                                        |  |         |        |          |      |    |   |        |
|--------|--------------------------------------------------------------------------------------------------------------------------------------------------------|--|---------|--------|----------|------|----|---|--------|
| FAM83F | family with sequence similarity 83, member F (FAM83F), mRNA                                                                                            |  | 16.9075 | -16.07 | 0.003538 | 324  | 13 | 1 | 34 [+] |
| FAM84B | Protein FAM84B (Protein NSE2) (Breast cancer membrane protein 101)                                                                                     |  | 15.4717 | -14.9  | 0.003545 | 608  | 13 | 1 | 16 [+] |
| FAM96A | Protein FAM96A                                                                                                                                         |  | 17.2369 | -18.52 | 0.003558 | 435  | 15 | 1 | 26 [+] |
| FAT    | Cadherin-related tumor suppressor homolog precursor (Protein fat homolog)                                                                              |  | 17.2351 | -31.39 | 0.003558 | 734  | 11 | 1 | 19 [+] |
| FBF1   | Fas (TNFRSF6) binding factor 1                                                                                                                         |  | 14.1669 | -16.78 | 0.003562 | 1000 | 10 | 1 | 10 [+] |
| FBLN1  | Fibulin-1 precursor                                                                                                                                    |  | 17.1692 | -20.15 | 0.00359  | 66   | 4  | 2 | 7 [+]  |
| FBP2   | Fructose-1,6-bisphosphatase isozyme 2 (EC 3.1.3.11) (D-fructose-1,6- biphosphate 1-phosphohydrolase 2) (FBPase 2)                                      |  | 14.5017 | -25.37 | 0.003596 | 1000 | 19 | 1 | 19 [+] |
| FBXL18 | F-box/LRR-repeat protein 18 (F-box and leucine-rich repeat protein 18)                                                                                 |  | 14.1602 | -10.67 | 0.003609 | 357  | 19 | 1 | 51 [+] |
| FBXO2  | F-box only protein 2                                                                                                                                   |  | 17.2187 | -20.59 | 0.003627 | 310  | 17 | 3 | 62 [+] |
| FBXO2  | F-box only protein 2                                                                                                                                   |  | 14.7018 | -15.7  | 0.003628 | 1000 | 10 | 1 | 10 [+] |
| FBXO24 | F-box only protein 24                                                                                                                                  |  | 16.9418 | -12.59 | 0.003634 | 282  | 16 | 5 | 44 [+] |
| FERD3L | Nephew of atonal 3                                                                                                                                     |  | 14.3533 | -14.49 | 0.003634 | 1201 | 12 | 1 | 11 [+] |
| FGG    | Fibrinogen gamma chain precursor                                                                                                                       |  | 16.3573 | -19.13 | 0.003641 | 825  | 18 | 3 | 28 [+] |
| FKBP1A | FK506-binding protein 1A (EC 5.2.1.8) (Peptidyl-prolyl cis-trans isomerase) (PPIase) (Rotamase) (12 kDa FKBP) (FKBP-12) (Immunophilin FKBP12)          |  | 14.155  | -17.21 | 0.003646 | 726  | 20 | 5 | 33 [+] |
| FKBP1A | FK506-binding protein 1A (EC 5.2.1.8) (Peptidyl-prolyl cis-trans isomerase) (PPIase) (Rotamase) (12 kDa FKBP) (FKBP-12) (Immunophilin FKBP12)          |  | 17.1997 | -22.05 | 0.0037   | 395  | 15 | 1 | 39 [+] |
| FMO1   | Dimethylaniline monooxygenase [N-oxide-forming] 1 (EC 1.14.13.8) (Fetal hepatic flavin-containing monooxygenase 1) (FMO 1) (Dimethylaniline oxidase 1) |  | 16.8784 | -16.07 | 0.003707 | 329  | 14 | 1 | 46 [+] |

|        |                                                                                                                                                        |         |        |          |      |    |   |          |
|--------|--------------------------------------------------------------------------------------------------------------------------------------------------------|---------|--------|----------|------|----|---|----------|
| FMO1   | Dimethylaniline monooxygenase [N-oxide-forming] 1 (EC 1.14.13.8) (Fetal hepatic flavin-containing monooxygenase 1) (FMO 1) (Dimethylaniline oxidase 1) | 16.8784 | -16.07 | 0.003707 | 329  | 14 | 1 | 45 [ + ] |
| FOXA3  | Hepatocyte nuclear factor 3-gamma (HNF-3G) (Forkhead box protein A3) (Fork head-related protein FKH H3)                                                | 17.1937 | -18.1  | 0.003723 | 314  | 15 | 8 | 62 [ + ] |
| FOXE1  | Forkhead box protein E1 (Thyroid transcription factor 2) (TTF-2) (Forkhead-related protein FKHL15)                                                     | 14.1432 | -13.55 | 0.003731 | 592  | 15 | 1 | 24 [ + ] |
| FOXE1  | Forkhead box protein E1 (Thyroid transcription factor 2) (TTF-2) (Forkhead-related protein FKHL15)                                                     | 15.7337 | -13.19 | 0.003735 | 1000 | 19 | 3 | 23 [ + ] |
| FREM1  | FRAS1-related extracellular matrix protein 1 precursor (Protein QBRICK)                                                                                | 14.134  | -22.5  | 0.003799 | 376  | 15 | 2 | 51 [ + ] |
| FRMD3  | FERM domain containing 3                                                                                                                               | 16.8612 | -16.07 | 0.00381  | 332  | 14 | 1 | 46 [ + ] |
| FRMPD2 | FERM and PDZ domain containing 2 isoform 3                                                                                                             | 16.8612 | -16.07 | 0.00381  | 332  | 14 | 1 | 46 [ + ] |
| FRMPD2 | FERM and PDZ domain containing 2 isoform 3                                                                                                             | 15.6351 | -18.97 | 0.003816 | 1000 | 3  | 1 | 4 [ + ]  |
| FRY    | Protein furry homolog                                                                                                                                  | 15.0792 | -19.67 | 0.003816 | 1000 | 12 | 1 | 12 [ + ] |
| FTSJ1  | Putative ribosomal RNA methyltransferase 1 (EC 2.1.1.-) (rRNA (uridine-2'-O)-methyltransferase)                                                        | 14.7374 | -14    | 0.003817 | 530  | 20 | 1 | 30 [ + ] |
| FUBP1  | Far upstream element-binding protein 1 (FUSE-binding protein 1) (FBP) (DNA helicase V) (HDH V)                                                         | 17.1692 | -20.15 | 0.003821 | 171  | 9  | 2 | 23 [ + ] |
| FUS    | RNA-binding protein FUS (Oncogene FUS) (Oncogene TLS) (Translocated in liposarcoma protein) (POMp75) (75 kDa DNA-pairing protein)                      | 17.1692 | -16.71 | 0.003821 | 240  | 14 | 3 | 48 [ + ] |

|         |                                                                                                                                                                                                                                                               |         |        |          |      |    |   |          |
|---------|---------------------------------------------------------------------------------------------------------------------------------------------------------------------------------------------------------------------------------------------------------------|---------|--------|----------|------|----|---|----------|
| GABBR1  | $\gamma$ -Aminobutyric acid type B receptor, subunit 1 precursor (GABA-B receptor 1) (GABA-B-R1) (Gb1)                                                                                                                                                        | 17.1691 | -14.87 | 0.003821 | 318  | 13 | 1 | 26 [ + ] |
| GALNTL4 | putative polypeptide N-acetylgalactosaminyltransferase-like protein 4 (EC 2.4.1.41) (Protein-UDP acetylgalactosaminyltransferase-like protein 4) (UDP-GalNAc:polypeptide N-acetylgalactosaminyltransferase-like protein 4) (Polypeptide GalNAc transferase-4) | 14.2466 | -10.84 | 0.003832 | 1000 | 13 | 2 | 20 [ + ] |
| GAPDHS  | Glyceroldehyde-5-phosphate dehydrogenase, testis-specific (EC 1.2.1.12) (Spermatogenic cell-specific glyceraldehyde 3-phosphate dehydrogenase 2) (GAPDH 2)                                                                                                    | 14.2706 | -19.26 | 0.003848 | 466  | 15 | 1 | 41 [ + ] |
| GCNT3   | glucosaminyl (N-acetyl) transferase 3, mucin type                                                                                                                                                                                                             | 14.1886 | -19.22 | 0.003848 | 1391 | 12 | 6 | 11 [ + ] |
| GDF9    | Growth/differentiation factor 9 precursor (GDF-9)                                                                                                                                                                                                             | 15.0337 | -9.84  | 0.003851 | 327  | 18 | 5 | 74 [ + ] |
| GEMIN5  | Gem-associated protein 5 (Gemin5)                                                                                                                                                                                                                             | 14.1268 | -14.1  | 0.003852 | 484  | 18 | 1 | 34 [ + ] |
| GHITM   | Growth hormone-inducible transmembrane protein (Dermal papilla-derived protein 2) (Transmembrane BAX inhibitor motif-containing protein 5)                                                                                                                    | 14.1259 | -16.49 | 0.003859 | 1000 | 8  | 1 | 8 [ + ]  |
| GHITM   | Growth hormone-inducible transmembrane protein (Dermal papilla-derived protein 2) (Transmembrane BAX inhibitor motif-containing protein 5)                                                                                                                    | 14.1245 | -16.7  | 0.00387  | 1000 | 8  | 1 | 7 [ + ]  |
| GHITM   | Growth hormone-inducible transmembrane protein (Dermal papilla-derived protein 2) (Transmembrane BAX inhibitor motif-containing protein 5)                                                                                                                    | 14.3    | -17.73 | 0.003883 | 2532 | 8  | 3 | 7 [ + ]  |



|          |                                                                                                                                                                            |         |        |          |      |    |   |        |
|----------|----------------------------------------------------------------------------------------------------------------------------------------------------------------------------|---------|--------|----------|------|----|---|--------|
| GHITM    | Growth hormone-inducible transmembrane protein (Dermal papilla-derived protein 2) (Transmembrane BAX inhibitor motif-containing protein 5)                                 | 17.1527 | -15.75 | 0.003888 | 442  | 17 | 1 | 35 [+] |
| GIPC1    | PDZ domain-containing protein GIPC1 (RGS19-interacting protein 1) (GAIP C-terminus-interacting protein) (RGS-GAIP-interacting protein) (Tax interaction protein 2) (TIP-2) | 14.1216 | -16.49 | 0.003892 | 1000 | 8  | 1 | 8 [+]  |
| GJA12    | Gap junction alpha-12 protein (Connexin-47) (Cx47) (Connexin-46.6) (Cx46.6)                                                                                                | 14.1215 | -16.77 | 0.003892 | 1432 | 6  | 2 | 10 [+] |
| GLIPR1L2 | GLI pathogenesis-related 1 like 2                                                                                                                                          | 14.8302 | -12.83 | 0.003907 | 572  | 21 | 2 | 39 [+] |
| GMNN     | Geminin                                                                                                                                                                    | 14.8202 | -23.25 | 0.003972 | 384  | 21 | 5 | 74 [+] |
| GNA15    | Guanine nucleotide-binding protein alpha-15 subunit (G alpha-15) (G alpha-16)                                                                                              | 14.4808 | -14.29 | 0.003975 | 1493 | 9  | 4 | 10 [+] |
| GNPAT    | Dihydroxyacetone phosphate acyltransferase (EC 2.3.1.42) (DHAP-AT) (DAP-AT) (Glycerone-phosphate O-acyltransferase) (Acyl-CoA:dihydroxyacetonephosphateacyltransferase)    | 14.6011 | -13.49 | 0.004    | 471  | 18 | 1 | 27 [+] |
| GOLT1A   | Vesicle transport protein GOT1A (Golgi transport 1 homolog A) (hGOT1b)                                                                                                     | 14.2017 | -17    | 0.004021 | 1000 | 19 | 6 | 29 [+] |
| GPR110   | Probable G-protein coupled receptor 110 precursor (G-protein coupled receptor PGR19) (G-protein coupled receptor KPG_012)                                                  | 14.6018 | -19.59 | 0.004024 | 1000 | 14 | 5 | 21 [+] |
| GPR142   | Probable G-protein coupled receptor 142 (G-protein coupled receptor PGR2)                                                                                                  | 14.8273 | -22.6  | 0.00403  | 1629 | 6  | 3 | 6 [+]  |
| GPR174   | Probable G-protein coupled receptor 174                                                                                                                                    | 14.3454 | -14.39 | 0.004037 | 1000 | 14 | 1 | 12 [+] |
| GPR62    | Probable G-protein coupled receptor 62 (hGPCR8)                                                                                                                            | 14.8873 | -27.33 | 0.004045 | 2440 | 6  | 1 | 5 [+]  |

|           |                                                                                                                                                                |  |         |        |          |      |    |   |          |
|-----------|----------------------------------------------------------------------------------------------------------------------------------------------------------------|--|---------|--------|----------|------|----|---|----------|
| GPR89B    | Protein GPR89A (Putative MAPK-activating protein PM01) (Putative NF-kappa-B-activating protein 90)                                                             |  | 17.115  | -23.83 | 0.004045 | 438  | 20 | 4 | 44 [ + ] |
| GRIN2A    | Glutamate [NMDA] receptor subunit epsilon-1 precursor (N-methyl D- aspartate receptor subtype 2A) (NR2A) (NMDAR2A) (hNR2A)                                     |  | 14.1017 | -21.07 | 0.004046 | 1000 | 9  | 1 | 9 [ + ]  |
| G RTP1    | growth hormone regulated TBC protein 1                                                                                                                         |  | 14.1017 | -21.78 | 0.004046 | 1000 | 10 | 1 | 11 [ + ] |
| GTF2E1    | Transcription initiation factor IIE subunit alpha (TFIIE-alpha) (General transcription factor IIE subunit 1) (General transcription factor IIE 56 kDa subunit) |  | 14.1017 | -21.78 | 0.004046 | 1000 | 10 | 1 | 11 [ + ] |
| GTPBP4    | Nucleolar GTP-binding protein 1 (Chronic renal failure gene protein) (GTP-binding protein NGB)                                                                 |  | 14.1017 | -17.96 | 0.004046 | 1000 | 18 | 4 | 20 [ + ] |
| GTPBP8    | GTP-binding protein 8 isoform 2                                                                                                                                |  | 14.1017 | -21.78 | 0.004046 | 1000 | 10 | 1 | 11 [ + ] |
| GUCA1A    | Guanylyl cyclase-activating protein 1 (GCAP 1) (Guanylate cyclase activator 1A)                                                                                |  | 15.7019 | -22.24 | 0.004046 | 1000 | 11 | 1 | 12 [ + ] |
| GUCA1A    | Guanylyl cyclase-activating protein 1 (GCAP 1) (Guanylate cyclase activator 1A)                                                                                |  | 14.1017 | -21.78 | 0.004046 | 1000 | 11 | 1 | 12 [ + ] |
| GUK1      | Guanylate kinase (EC 2.7.4.8) (GMP kinase)                                                                                                                     |  | 14.8806 | -11.11 | 0.004054 | 564  | 20 | 3 | 46 [ + ] |
| GYG2      | Glycogenin-2 (EC 2.4.1.186) (GN-2) (GN2)                                                                                                                       |  | 14.3266 | -12.06 | 0.004065 | 262  | 11 | 1 | 29 [ + ] |
| GYG2      | Glycogenin-2 (EC 2.4.1.186) (GN-2) (GN2)                                                                                                                       |  | 14.3266 | -11.19 | 0.004065 | 297  | 17 | 1 | 58 [ + ] |
| GYG2      | Glycogenin-2 (EC 2.4.1.186) (GN-2) (GN2)                                                                                                                       |  | 14.3266 | -12.06 | 0.004065 | 264  | 11 | 2 | 30 [ + ] |
| H33_HUMAN | Histone H3.3                                                                                                                                                   |  | 14.0982 | -17.29 | 0.004073 | 655  | 22 | 6 | 44 [ + ] |
| H3F3A     | Histone H3.3                                                                                                                                                   |  | 14.5401 | -20.14 | 0.004082 | 1000 | 14 | 1 | 15 [ + ] |
| H3F3A     | Histone H3.3                                                                                                                                                   |  | 14.9861 | -8.82  | 0.004113 | 325  | 19 | 6 | 60 [ + ] |
| HACL1     | 2-hydroxyacyl-CoA lyase 1 (EC 4.1.-.-) (2-hydroxyphytanoyl-CoA lyase) (2-HPCL)                                                                                 |  | 15.5027 | -19.37 | 0.00416  | 1000 | 11 | 2 | 14 [ + ] |

|             |                                                                                                                                                                          |         |        |          |      |    |   |        |
|-------------|--------------------------------------------------------------------------------------------------------------------------------------------------------------------------|---------|--------|----------|------|----|---|--------|
| HBP1        | HMG box-containing protein 1 (HMG box transcription factor 1) (High mobility group box transcription factor 1)                                                           | 14.618  | -24.12 | 0.004166 | 708  | 19 | 4 | 27 [+] |
| hCG_2040201 | NOT ANNOTATED                                                                                                                                                            | 14.3314 | -17.63 | 0.004184 | 601  | 15 | 1 | 26 [+] |
| HEPH        | Hephaestin precursor (EC 1.-.-.)                                                                                                                                         | 14.425  | -17.57 | 0.004195 | 1000 | 20 | 4 | 30 [+] |
| HEPH        | Hephaestin precursor (EC 1.-.-.)                                                                                                                                         | 14.425  | -17.57 | 0.004195 | 1000 | 16 | 1 | 21 [+] |
| HERC2P2     | IRX1 protein                                                                                                                                                             | 15.0017 | -20.12 | 0.004199 | 766  | 13 | 1 | 15 [+] |
| HIF3A       | Hypoxia-inducible factor 3 alpha (HIF-3 alpha) (HIF3 alpha 1) (Member of PAS protein 7) (Basic-helix-loop-helix-PAS protein MOP7) (Inhibitory PAS domain protein) (IPAS) | 14.4206 | -16.1  | 0.004221 | 1000 | 23 | 2 | 38 [+] |
| HIST1H1T    | Histone H1t (Testicular H1 histone)                                                                                                                                      | 14.8951 | -17.67 | 0.004229 | 212  | 11 | 3 | 35 [+] |
| HLA-B       | HLA class I histocompatibility antigen, B-7 alpha chain precursor (MHC class I antigen B*7)                                                                              | 15.0088 | -17.12 | 0.004229 | 103  | 6  | 2 | 15 [+] |
| HLA-C       | HLA class I histocompatibility antigen, Cw-7 alpha chain precursor (MHC class I antigen Cw*7)                                                                            | 14.554  | -14.12 | 0.004229 | 222  | 14 | 5 | 47 [+] |
| HLA-C       | HLA class I histocompatibility antigen, Cw-7 alpha chain precursor (MHC class I antigen Cw*7)                                                                            | 15.2267 | -11.26 | 0.00424  | 344  | 19 | 2 | 31 [+] |
| HLA-DMB     | major histocompatibility complex, class II, DM beta (HLA-DMB), mRNA                                                                                                      | 14.6221 | -15.62 | 0.004242 | 952  | 11 | 1 | 13 [+] |
| HLA-G       | HLA class I histocompatibility antigen, alpha chain G precursor (HLA G antigen)                                                                                          | 14.0739 | -10.34 | 0.004271 | 1000 | 17 | 2 | 24 [+] |
| HLA-J       | MHC class I HLA-J antigen (Fragment)                                                                                                                                     | 14.0818 | -14.71 | 0.004293 | 1586 | 7  | 9 | 8 [+]  |
| HLA-J       | MHC class I HLA-J antigen (Fragment)                                                                                                                                     | 17.0555 | -17.57 | 0.004297 | 236  | 13 | 1 | 36 [+] |
| HLA-J       | MHC class I HLA-J antigen (Fragment)                                                                                                                                     | 17.0555 | -19.29 | 0.004307 | 119  | 5  | 1 | 14 [+] |
| HMGB2       | High mobility group protein B2 (High mobility group protein 2) (HMG- 2)                                                                                                  | 17.0555 | -14.24 | 0.004307 | 161  | 9  | 1 | 28 [+] |

|             |                                                                                                                                                                              |  |         |        |          |      |    |   |        |
|-------------|------------------------------------------------------------------------------------------------------------------------------------------------------------------------------|--|---------|--------|----------|------|----|---|--------|
| HNRPA0      | Heterogeneous nuclear ribonucleoprotein A0 (hnRNP A0)                                                                                                                        |  | 14.6125 | -15.62 | 0.004317 | 958  | 12 | 2 | 15 [+] |
| HNRPK       | Heterogeneous nuclear ribonucleoprotein K (hnRNP K) (Transformation up-regulated nuclear protein) (TUNP)                                                                     |  | 14.738  | -16.25 | 0.00433  | 567  | 18 | 1 | 30 [+] |
| HOXA10      | Homeobox protein Hox-A10 (Hox-1H) (Hox-1.8) (PL)                                                                                                                             |  | 15.3287 | -13.88 | 0.004338 | 359  | 16 | 1 | 54 [+] |
| HOXA9       | Homeobox protein Hox-A9 (Hox-1G)                                                                                                                                             |  | 14.4029 | -19.76 | 0.004348 | 1156 | 14 | 2 | 14 [+] |
| HOXA9       | Homeobox protein Hox-A9 (Hox-1G)                                                                                                                                             |  | 14.0635 | -16.79 | 0.004358 | 1000 | 20 | 6 | 28 [+] |
| HRBL        | HIV-1 Rev-binding protein-like protein (Rev/Rex activation domain- binding protein related) (RAB-R)                                                                          |  | 14.7018 | -24.27 | 0.00438  | 1000 | 13 | 2 | 12 [+] |
| HRK         | Activator of apoptosis harakiri (Neuronal death protein DP5) (BH3- interacting domain protein 3)                                                                             |  | 14.5784 | -13.44 | 0.004399 | 621  | 22 | 3 | 46 [+] |
| HS3ST2      | Heparan sulfate glucosamine 3-O-sulfotransferase 2 (EC 2.8.2.29) (Heparan sulfate D-glucosaminyl 3-O-sulfotransferase 2) (Heparan sulfate 3-O-sulfotransferase 2) (h3-OST-2) |  | 14.9036 | -21.73 | 0.004405 | 1000 | 14 | 2 | 18 [+] |
| HSFY1       | Heat shock transcription factor, Y-linked (Heat shock transcription factor 2-like protein) (HSF2-like)                                                                       |  | 14.188  | -12.7  | 0.004494 | 1000 | 15 | 1 | 15 [+] |
| HSP77_HUMAN | Heat shock 70 kDa protein 7 (Heat shock 70 kDa protein B) (Fragment)                                                                                                         |  | 14.9101 | -17.88 | 0.004509 | 665  | 26 | 6 | 38 [+] |
| HSP90AA1    | Heat shock protein HSP 90-alpha (HSP 86) (Renal carcinoma antigen NY- REN-38)                                                                                                |  | 15.5522 | -21.11 | 0.004518 | 1101 | 10 | 1 | 10 [+] |
| HSPA4L      | Heat shock 70 kDa protein 4L (Osmotic stress protein 94) (Heat shock 70-related protein APG-1)                                                                               |  | 16.6007 | -14.49 | 0.004536 | 115  | 7  | 7 | 36 [+] |

|          |                                                                                                                                                                                                                                                       |         |        |          |      |    |   |        |
|----------|-------------------------------------------------------------------------------------------------------------------------------------------------------------------------------------------------------------------------------------------------------|---------|--------|----------|------|----|---|--------|
| HUWE1    | E3 ubiquitin-protein ligase HUWE1 (EC 6.3.2.-) (HECT, UBA and WWE domain-containing protein 1) (URE-B1) (Mcl-1 ubiquitin ligase E3) (Mule) (ARF-binding protein 1) (ARF-BP1)                                                                          | 17.0059 | -15.99 | 0.004537 | 438  | 20 | 5 | 43 [+] |
| HYI      | hydroxypyruvate isomerase homolog                                                                                                                                                                                                                     | 14.0401 | -17.45 | 0.00456  | 1000 | 9  | 1 | 11 [+] |
| HYI      | hydroxypyruvate isomerase homolog                                                                                                                                                                                                                     | 15.4441 | -24.57 | 0.00456  | 1000 | 10 | 2 | 12 [+] |
| IARS2    | Isoleucyl-tRNA synthetase, mitochondrial precursor (EC 6.1.1.5) (Isoleucine--tRNA ligase) (IleRS)                                                                                                                                                     | 14.9518 | -15.33 | 0.004591 | 855  | 17 | 5 | 33 [+] |
| IER3     | Radiation-inducible immediate-early gene IEX-1 (Immediate early protein GLY96) (Immediate early response 3 protein) (PACAP-responsive gene 1 protein) (Protein PRG1) (Differentiation-dependent gene 2 protein) (Protein DIF-2)                       | 14.3775 | -10.13 | 0.004595 | 670  | 12 | 1 | 16 [+] |
| IFLTD1   | intermediate filament tail domain containing 1                                                                                                                                                                                                        | 15.3694 | -17.74 | 0.004599 | 957  | 12 | 7 | 19 [+] |
| IGFBPL1  | insulin-like growth factor binding protein-like 1                                                                                                                                                                                                     | 14.0285 | -15.6  | 0.004663 | 1215 | 12 | 1 | 12 [+] |
| IGLV3-25 | Immunoglobulin Lambda light chain V gene segment                                                                                                                                                                                                      | 15.8884 | -16.8  | 0.004695 | 445  | 22 | 4 | 52 [+] |
| IGLV3-32 | Immunoglobulin Lambda light chain V gene segment                                                                                                                                                                                                      | 16.1459 | -12.46 | 0.004744 | 129  | 8  | 2 | 38 [+] |
| IHPK2    | Inositol hexakisphosphate kinase 2 (EC 2.7.4.21) (InsP6 kinase 2) (P(i)-uptake stimulator) (PiUS)                                                                                                                                                     | 16.9418 | -20.4  | 0.004854 | 190  | 10 | 5 | 37 [+] |
| IKBKG    | NF-κB essential modulator (NEMO) (NF-kappa-B essential modifier) (Inhibitor of nuclear factor kappa-B kinase subunit gamma) (IκB kinase subunit gamma) (I-kappa-B kinase gamma) (IKK-gamma) (IKKG) (IκB kinase-associated protein 1) (IKKAP1) (FIP-3) | 14.6406 | -17.71 | 0.004858 | 770  | 19 | 3 | 31 [+] |

|         |                                                                                                                                                                                                                                                                                  |         |        |          |     |    |   |          |
|---------|----------------------------------------------------------------------------------------------------------------------------------------------------------------------------------------------------------------------------------------------------------------------------------|---------|--------|----------|-----|----|---|----------|
| IKBKG   | NF- $\kappa$ B essential modulator (NEMO) (NF-kappa-B essential modifier) (Inhibitor of nuclear factor kappa-B kinase subunit gamma) (I $\kappa$ B kinase subunit gamma) (I-kappa-B kinase gamma) (IKK-gamma) (IKKG) (I $\kappa$ B kinase-associated protein 1) (IKKAP1) (FIP-3) | 16.6072 | -23.54 | 0.004914 | 654 | 23 | 6 | 33 [ + ] |
| IKBKG   | NF- $\kappa$ B essential modulator (NEMO) (NF-kappa-B essential modifier) (Inhibitor of nuclear factor kappa-B kinase subunit gamma) (I $\kappa$ B kinase subunit gamma) (I-kappa-B kinase gamma) (IKK-gamma) (IKKG) (I $\kappa$ B kinase-associated protein 1) (IKKAP1) (FIP-3) | 16.9277 | -21.11 | 0.004927 | 791 | 9  | 1 | 14 [ + ] |
| IL11RA  | Interleukin-11 receptor alpha chain precursor (IL-11R-alpha) (IL- 11RA)                                                                                                                                                                                                          | 14.4078 | -14.44 | 0.004963 | 328 | 19 | 5 | 49 [ + ] |
| IL13RA1 | Interleukin-13 receptor alpha-1 chain precursor (IL-13R-alpha-1) (IL- 13RA-1) (CD213a1 antigen)                                                                                                                                                                                  | 14.3364 | -14.86 | 0.00498  | 849 | 12 | 6 | 15 [ + ] |
| IL18BP  | Calcium/calmodulin-dependent 3',5'-cyclic nucleotide phosphodiesterase 1A (EC 3.1.4.17) (Cam-PDE 1A) (61 kDa Cam-PDE) (hCam-1)                                                                                                                                                   | 14.554  | -12.49 | 0.005014 | 122 | 6  | 5 | 18 [ + ] |
| IL18RAP | Interleukin-18 receptor accessory protein precursor (IL-18 receptor accessory protein) (IL-18RAcP) (Interleukin-18 receptor accessory protein-like) (IL-18Rbeta) (IL-1R accessory protein-like) (IL-1RAcPL) (Accessory protein-like) (AcPL) (IL-1R7) (CD218b an                  | 16.9075 | -16.07 | 0.005032 | 324 | 13 | 1 | 32 [ + ] |
| IL23A   | Interleukin-23 subunit alpha precursor (IL-23 subunit alpha) (Interleukin-23 subunit p19) (IL-23p19)                                                                                                                                                                             | 16.9075 | -16.07 | 0.005032 | 324 | 13 | 1 | 32 [ + ] |

|         |                                                                                                                                                                                                                                                           |  |         |        |          |      |    |   |        |
|---------|-----------------------------------------------------------------------------------------------------------------------------------------------------------------------------------------------------------------------------------------------------------|--|---------|--------|----------|------|----|---|--------|
| IL27    | Interleukin 27                                                                                                                                                                                                                                            |  | 15.0018 | -15.23 | 0.005034 | 1000 | 17 | 3 | 25 [+] |
| IL28RA  | Interleukin-28 receptor alpha chain precursor (IL-28R-alpha) (IL-28RA) (Cytokine receptor family 2 member 12) (Cytokine receptor class-II member 12) (CRF2-12) (Interferon lambda receptor 1) (IFN-lambda R1) (Likely interleukin or cytokine receptor 2) |  | 14.3291 | -19.52 | 0.005052 | 1599 | 12 | 4 | 13 [+] |
| IL9R    | Interleukin-9 receptor precursor (IL-9R) (CD129 antigen)                                                                                                                                                                                                  |  | 14.3266 | -16.91 | 0.005077 | 124  | 7  | 7 | 45 [+] |
| IRF4    | Interferon regulatory factor 4 (IRF-4) (Lymphocyte-specific interferon regulatory factor) (LSIRF) (NF-EM5) (Multiple myeloma oncogene 1)                                                                                                                  |  | 14.4403 | -15.74 | 0.00511  | 220  | 11 | 3 | 40 [+] |
| ISCA1   | Iron-sulfur cluster assembly 1 homolog, mitochondrial precursor (HESB-like domain-containing protein 2) (Iron sulfur assembly protein IscA) (hIscA)                                                                                                       |  | 15.4636 | -16.67 | 0.005203 | 63   | 4  | 5 | 17 [+] |
| ITGA11  | Integrin alpha-11 precursor                                                                                                                                                                                                                               |  | 16.6768 | -26.9  | 0.005236 | 306  | 17 | 6 | 71 [+] |
| ITGB8   | Integrin beta-8 precursor                                                                                                                                                                                                                                 |  | 16.8635 | -15.14 | 0.005271 | 600  | 19 | 1 | 23 [+] |
| ITPA    | Inosine triphosphate pyrophosphatase (EC 3.6.1.19) (ITPase) (Inosine triphosphatase) (Putative oncogene protein hlc14-06-p)                                                                                                                               |  | 16.8605 | -15.14 | 0.005288 | 601  | 19 | 2 | 26 [+] |
| IXL     | intersex-like                                                                                                                                                                                                                                             |  | 14.3266 | -15.22 | 0.005338 | 265  | 15 | 1 | 53 [+] |
| JAG2    | Jagged-2 precursor (Jagged2) (HJ2)                                                                                                                                                                                                                        |  | 14.6264 | -16.95 | 0.005431 | 2742 | 2  | 2 | 3 [+]  |
| JAK1    | Tyrosine-protein kinase JAK1 (EC 2.7.10.2) (Janus kinase 1) (JAK-1)                                                                                                                                                                                       |  | 16.8306 | -29.44 | 0.005457 | 932  | 12 | 1 | 15 [+] |
| JAK1    | Tyrosine-protein kinase JAK1 (EC 2.7.10.2) (Janus kinase 1) (JAK-1)                                                                                                                                                                                       |  | 16.8281 | -17.29 | 0.005471 | 142  | 5  | 1 | 8 [+]  |
| KBTBD10 | Kelch repeat and BTB domain-containing protein 10 (Kelch-related protein 1) (Kel-like protein 23) (Sarcosin)                                                                                                                                              |  | 16.8281 | -18.41 | 0.005471 | 306  | 15 | 7 | 65 [+] |

|         |                                                                                                                                                                                                                                               |  |         |        |          |      |    |   |          |
|---------|-----------------------------------------------------------------------------------------------------------------------------------------------------------------------------------------------------------------------------------------------|--|---------|--------|----------|------|----|---|----------|
| KCNC1   | Potassium voltage-gated channel subfamily C member 1 (Voltage-gated potassium channel subunit Kv3.1) (Kv4) (NGK2)                                                                                                                             |  | 16.8217 | -14.92 | 0.005493 | 301  | 14 | 1 | 44 [ + ] |
| KCNH2   | Potassium voltage-gated channel subfamily H member 2 (Voltage-gated potassium channel subunit Kv11.1) (Ether-a-go-go-related gene potassium channel 1) (H-ERG) (Erg1) (Ether-a-go-go-related protein 1) (Eag-related protein 1) (eag homolog) |  | 14.8076 | -26.59 | 0.005551 | 1000 | 26 | 4 | 29 [ + ] |
| KCNJ12  | ATP-sensitive inward rectifier potassium channel 12 (Potassium channel, inwardly rectifying subfamily J member 12) (Inward rectifier K(+) channel Kir2.2) (Kir2.2v) (IRK2)                                                                    |  | 14.2933 | -13.45 | 0.005785 | 1157 | 10 | 3 | 11 [ + ] |
| KCNN1   | Small conductance calcium-activated potassium channel protein 1 (SK1)                                                                                                                                                                         |  | 16.062  | -20.51 | 0.005899 | 1091 | 15 | 3 | 17 [ + ] |
| KDEL2   | ER lumen protein retaining receptor 2 (KDEL receptor 2) (KDEL endoplasmic reticulum protein retention receptor 2) (ERD2-like protein 1) (ELP-1)                                                                                               |  | 15.3018 | -19.06 | 0.006015 | 1000 | 20 | 7 | 33 [ + ] |
| KDEL2   | ER lumen protein retaining receptor 2 (KDEL receptor 2) (KDEL endoplasmic reticulum protein retention receptor 2) (ERD2-like protein 1) (ELP-1)                                                                                               |  | 14.2129 | -8.94  | 0.006042 | 291  | 16 | 4 | 64 [ + ] |
| KERA    | Keratocan precursor (KTN) (Keratan sulfate proteoglycan keratocan)                                                                                                                                                                            |  | 16.7296 | -15.16 | 0.00605  | 426  | 14 | 1 | 21 [ + ] |
| KHDRBS1 | KH domain-containing, RNA-binding, signal transduction-associated protein 1 (p21 Ras GTPase-activating protein-associated p62) (GAP-associated tyrosine phosphoprotein p62) (Src-associated in mitosis 68 kDa protein) (Sam68) (p68)          |  | 16.7174 | -25.93 | 0.006146 | 633  | 25 | 5 | 54 [ + ] |



|          |                                                                                                                                                                                                                                      |         |        |          |      |    |   |        |
|----------|--------------------------------------------------------------------------------------------------------------------------------------------------------------------------------------------------------------------------------------|---------|--------|----------|------|----|---|--------|
| KHDRBS1  | KH domain-containing, RNA-binding, signal transduction-associated protein 1 (p21 Ras GTPase-activating protein-associated p62) (GAP-associated tyrosine phosphoprotein p62) (Src-associated in mitosis 68 kDa protein) (Sam68) (p68) | 14.2273 | -11.83 | 0.006161 | 319  | 18 | 7 | 55 [+] |
| KIAA0040 | Uncharacterized protein KIAA0040                                                                                                                                                                                                     | 15.1532 | -10.92 | 0.00619  | 711  | 19 | 8 | 37 [+] |
| KIAA0090 | Uncharacterized protein KIAA0090 precursor                                                                                                                                                                                           | 14.2129 | -15.39 | 0.006335 | 296  | 17 | 8 | 65 [+] |
| KIAA0368 | Proteasome-associated protein ECM29 homolog (Ecm29)                                                                                                                                                                                  | 16.6876 | -20.5  | 0.006342 | 343  | 20 | 2 | 39 [+] |
| KIAA0528 | Uncharacterized protein KIAA0528                                                                                                                                                                                                     | 16.6751 | -23.54 | 0.006406 | 629  | 18 | 1 | 19 [+] |
| KIAA0907 | KIAA0907 (KIAA0907), mRNA                                                                                                                                                                                                            | 16.6706 | -19.27 | 0.006436 | 440  | 15 | 1 | 34 [+] |
| KIAA1305 | KIAA1305 (KIAA1305), mRNA                                                                                                                                                                                                            | 15.1018 | -16.85 | 0.006461 | 1000 | 23 | 2 | 27 [+] |
| KIAA1468 | KIAA1468 (KIAA1468), mRNA                                                                                                                                                                                                            | 14.2017 | -12.92 | 0.006473 | 1000 | 10 | 1 | 12 [+] |
| KIAA1600 | Uncharacterized protein KIAA1600                                                                                                                                                                                                     | 14.305  | -28.39 | 0.006478 | 2862 | 3  | 3 | 4 [+]  |
| KIAA2013 | KIAA2013 (KIAA2013), mRNA                                                                                                                                                                                                            | 14.5298 | -17.33 | 0.006529 | 1597 | 4  | 3 | 4 [+]  |
| KIAA2013 | KIAA2013 (KIAA2013), mRNA                                                                                                                                                                                                            | 14.4403 | -10.37 | 0.006538 | 174  | 9  | 5 | 34 [+] |
| KIF7     | Kinesin family member 7                                                                                                                                                                                                              | 15.0214 | -13.86 | 0.006657 | 681  | 14 | 4 | 28 [+] |
| KIR2DL1  | Killer cell immunoglobulin-like receptor 3DL2 precursor (MHC class I NK cell receptor) (Natural killer-associated transcript 4) (NKAT-4) (p70 natural killer cell receptor clone CL-5) (CD158k antigen)                              | 14.9529 | -16.59 | 0.006665 | 566  | 16 | 6 | 28 [+] |
| KISS1R   | KiSS-1 receptor (KiSS-1R) (Kisspeptins receptor) (Metastin receptor) (G-protein coupled receptor 54) (Hypogonadotropin-1) (hOT7T175)                                                                                                 | 16.6244 | -22.23 | 0.006778 | 1000 | 15 | 1 | 17 [+] |
| KLC1     | Kinesin light chain 1 (KLC 1)                                                                                                                                                                                                        | 14.9898 | -19.92 | 0.006788 | 982  | 18 | 5 | 25 [+] |
| KLF1     | Kruempel-like factor 1 (Erythroid kruempel-like transcription factor) (EKLF) (Erythroid transcription factor)                                                                                                                        | 16.6221 | -22.39 | 0.006795 | 988  | 11 | 1 | 8 [+]  |

|             |                                                                                                                                                                                     |         |        |          |      |    |   |        |
|-------------|-------------------------------------------------------------------------------------------------------------------------------------------------------------------------------------|---------|--------|----------|------|----|---|--------|
| KLF14       | Krueppel-like factor 14 (Transcription factor BTEB5) (Basic transcription element-binding protein 5) (BTE-binding protein 5)                                                        | 14.524  | -17.77 | 0.006807 | 1305 | 16 | 6 | 25 [+] |
| KR261_HUMAN | Keratin-associated protein 26-1                                                                                                                                                     | 14.9882 | -16.22 | 0.00683  | 347  | 15 | 4 | 54 [+] |
| KRT10       | Keratin, type I cytoskeletal 10 (Cytokeratin-10) (CK-10) (Keratin-10) (K10)                                                                                                         | 14.8674 | -22.07 | 0.006894 | 782  | 21 | 6 | 33 [+] |
| KRT33B      | Keratin, type I cuticular Ha3-II (Hair keratin, type I Ha3-II)                                                                                                                      | 14.1682 | -13.3  | 0.006907 | 331  | 19 | 3 | 66 [+] |
| KRT38       | Keratin, type I cuticular Ha8 (Hair keratin, type I Ha8)                                                                                                                            | 16.6028 | -15.83 | 0.006933 | 359  | 18 | 3 | 44 [+] |
| KRTAP10-1   | Keratin-associated protein 10-1 (Keratin-associated protein 10.1) (High sulfur keratin-associated protein 10.1) (Keratin-associated protein 18-1) (Keratin-associated protein 18.1) | 16.6007 | -14.52 | 0.006949 | 205  | 10 | 5 | 37 [+] |
| LALBA       | Alpha-lactalbumin precursor (Lactose synthase B protein) (Lysozyme-like protein 7)                                                                                                  | 15.5529 | -17.63 | 0.006992 | 1032 | 17 | 6 | 18 [+] |
| LAMA4       | Laminin subunit alpha-4 precursor                                                                                                                                                   | 16.5865 | -20.5  | 0.007029 | 434  | 21 | 6 | 64 [+] |
| LCE2B       | Late cornified envelope protein 2B (Late envelope protein 10) (Small proline-rich-like epidermal differentiation complex protein 1B) (Skin-specific protein Xp5)                    | 14.6524 | -15.76 | 0.007091 | 1000 | 14 | 2 | 13 [+] |
| LCE2D       | Late cornified envelope protein 2D (Late envelope protein 12) (Small proline-rich-like epidermal differentiation complex protein 2A)                                                | 16.5766 | -18.77 | 0.007128 | 1000 | 17 | 2 | 18 [+] |
| LCE3C       | Late cornified envelope protein 3C (Late envelope protein 15) (Small proline-rich-like epidermal differentiation complex protein 3A)                                                | 14.2858 | -16.49 | 0.007263 | 1338 | 10 | 6 | 10 [+] |
| LCE4A       | Late cornified envelope protein 4A (Late envelope protein 8) (Small proline-rich-like epidermal differentiation complex protein 4A)                                                 | 14.3691 | -15.65 | 0.007542 | 1059 | 10 | 5 | 15 [+] |

|           |                                                                                                                                                                        |  |         |        |          |      |    |   |        |
|-----------|------------------------------------------------------------------------------------------------------------------------------------------------------------------------|--|---------|--------|----------|------|----|---|--------|
| LCK       | Proto-oncogene tyrosine-protein kinase LCK (EC 2.7.10.2) (p56-LCK) (Lymphocyte cell-specific protein-tyrosine kinase) (LSK) (T cell- specific protein-tyrosine kinase) |  | 14.1557 | -23.82 | 0.007681 | 691  | 22 | 4 | 35 [+] |
| LEMD1     | LEM domain containing 1                                                                                                                                                |  | 16.502  | -30.42 | 0.007709 | 1000 | 11 | 2 | 18 [+] |
| LEMD1     | LEM domain containing 1                                                                                                                                                |  | 14.4528 | -20.24 | 0.007741 | 1188 | 23 | 6 | 27 [+] |
| LEMD1     | LEM domain containing 1                                                                                                                                                |  | 16.4975 | -18    | 0.007745 | 711  | 22 | 9 | 34 [+] |
| LEMD1     | LEM domain containing 1                                                                                                                                                |  | 16.487  | -19.42 | 0.007801 | 300  | 14 | 1 | 41 [+] |
| LEPR      | Leptin receptor precursor (LEP-R) (OB receptor) (OB-R) (HuB219) (CD295 antigen)                                                                                        |  | 16.487  | -16.21 | 0.007831 | 207  | 11 | 1 | 48 [+] |
| LGI4      | Leucine-rich repeat LGI family member 4 precursor (Leucine-rich glioma-inactivated protein 4) (LGI1-like protein 3)                                                    |  | 16.487  | -13.41 | 0.007831 | 247  | 12 | 1 | 46 [+] |
| LIG4      | DNA ligase 4 (EC 6.5.1.1) (DNA ligase IV) (Polydeoxyribonucleotide synthase [ATP])                                                                                     |  | 14.0992 | -14.51 | 0.007886 | 256  | 16 | 6 | 49 [+] |
| LIG4      | DNA ligase 4 (EC 6.5.1.1) (DNA ligase IV) (Polydeoxyribonucleotide synthase [ATP])                                                                                     |  | 14.0992 | -10.55 | 0.007886 | 299  | 17 | 6 | 67 [+] |
| LMO1      | Rhombotin-1 (LIM domain only protein 1) (Cysteine-rich protein TTG-1) (T-cell translocation protein 1)                                                                 |  | 16.4774 | -22.61 | 0.007911 | 443  | 22 | 6 | 50 [+] |
| LMX1B     | LIM homeobox transcription factor 1 beta (LIM/homeobox protein LMX1B) (LIM/homeobox protein 1.2) (LMX-1.2)                                                             |  | 14.0966 | -17.46 | 0.007926 | 569  | 20 | 2 | 44 [+] |
| LMX1B     | LIM homeobox transcription factor 1 beta (LIM/homeobox protein LMX1B) (LIM/homeobox protein 1.2) (LMX-1.2)                                                             |  | 14.3722 | -17.15 | 0.008277 | 1790 | 12 | 2 | 13 [+] |
| LOC283398 | NOT ANNOTATED                                                                                                                                                          |  | 16.4251 | -19.48 | 0.008357 | 1000 | 11 | 3 | 14 [+] |
| LOC342994 | 60S ribosomal protein L34 60S ribosomal protein L34                                                                                                                    |  | 14.8424 | -17.48 | 0.008495 | 2223 | 9  | 3 | 9 [+]  |
| LOC387867 | NOT ANNOTATED                                                                                                                                                          |  | 14.0586 | -17.52 | 0.008524 | 409  | 19 | 4 | 46 [+] |
| LOC441873 | NOT ANNOTATED                                                                                                                                                          |  | 16.3965 | -21.71 | 0.008576 | 1000 | 11 | 1 | 12 [+] |

|           |                                                                                                                                          |         |        |          |      |    |   |        |
|-----------|------------------------------------------------------------------------------------------------------------------------------------------|---------|--------|----------|------|----|---|--------|
| LOC652153 | CDNA FLJ14665 fis, clone NT2RP2002891. CDNA FLJ14665 fis, clone NT2RP2002891. BY ORTHOLOGY TO:ENSMODT00000029714                         | 14.2668 | -13.99 | 0.008777 | 501  | 15 | 5 | 23 [+] |
| LOC728932 | NOT ANNOTATED                                                                                                                            | 14.2806 | -11.95 | 0.008799 | 438  | 19 | 3 | 38 [+] |
| LOC729368 | NOT ANNOTATED                                                                                                                            | 16.3735 | -18    | 0.008823 | 797  | 12 | 1 | 15 [+] |
| LOC730029 | NOT ANNOTATED                                                                                                                            | 16.3733 | -13.97 | 0.008825 | 277  | 11 | 1 | 22 [+] |
| LOC731576 | high mobility group nucleosomal binding domain 1 . high mobility group nucleosomal binding domain 1 . BY ORTHOLOGY TO:ENSRNOT00000022557 | 16.3733 | -17.17 | 0.008825 | 147  | 7  | 1 | 22 [+] |
| LOC731640 | NOT ANNOTATED                                                                                                                            | 16.3733 | -17.17 | 0.008825 | 154  | 7  | 1 | 23 [+] |
| LPA       | Apolipoprotein(a) precursor (EC 3.4.21.-) (Apo(a)) (Lp(a))                                                                               | 16.3733 | -17.17 | 0.008825 | 157  | 8  | 5 | 28 [+] |
| LRRC3B    | Leucine-rich repeat-containing protein 3B precursor (Leucine-rich repeat protein LRP15)                                                  | 14.3266 | -7.74  | 0.008847 | 249  | 15 | 4 | 51 [+] |
| LRRC45    | Leucine-rich repeat-containing protein 45                                                                                                | 16.362  | -25.14 | 0.008891 | 1000 | 12 | 1 | 13 [+] |
| LRRIQ1    | leucine-rich repeats and IQ motif containing 1 isoform 2                                                                                 | 14.0457 | -18.56 | 0.008962 | 1761 | 6  | 3 | 8 [+]  |
| LSM14B    | LSM14 protein homolog B (Protein FAM61B)                                                                                                 | 14.0306 | -16.24 | 0.008991 | 2072 | 2  | 1 | 2 [+]  |
| LSS       | Lanosterol synthase (EC 5.4.99.7) (Oxidosqualene--lanosterol cyclase) (2,3-epoxysqualene--lanosterol cyclase) (OSC)                      | 14.554  | -8.2   | 0.008996 | 107  | 7  | 6 | 13 [+] |
| LY6G6D    | G6f protein                                                                                                                              | 16.3389 | -23.55 | 0.009149 | 415  | 21 | 5 | 58 [+] |
| LY6G6D    | G6f protein                                                                                                                              | 16.3323 | -21.48 | 0.009171 | 1254 | 9  | 3 | 8 [+]  |
| MAL       | Myelin and lymphocyte protein (T-lymphocyte maturation-associated protein)                                                               | 14.4545 | -20.72 | 0.009176 | 2379 | 9  | 2 | 7 [+]  |

|        |                                                                                                                                                                                                          |  |         |        |          |      |    |   |        |
|--------|----------------------------------------------------------------------------------------------------------------------------------------------------------------------------------------------------------|--|---------|--------|----------|------|----|---|--------|
| MAN1B1 | Endoplasmic reticulum mannosyl-oligosaccharide 1,2-alpha-mannosidase (EC 3.2.1.113) (ER alpha-1,2-mannosidase) (Mannosidase alpha class 1B member 1) (Man9GlcNAc2-specific-processing alpha-mannosidase) |  | 16.3346 | -23.55 | 0.009191 | 416  | 17 | 1 | 38 [+] |
| MAP1S  | BPY2 interacting protein 1                                                                                                                                                                               |  | 16.326  | -23.55 | 0.009274 | 418  | 17 | 1 | 38 [+] |
| MAP3K5 | Mitogen-activated protein kinase kinase 5 (EC 2.7.11.25) (MAPK/ERK kinase kinase 5) (MEK kinase 5) (MEKK 5) (Apoptosis signal- regulating kinase 1) (ASK-1)                                              |  | 14.1389 | -13.31 | 0.009296 | 1608 | 10 | 8 | 9 [+]  |
| MAP3K5 | Mitogen-activated protein kinase kinase 5 (EC 2.7.11.25) (MAPK/ERK kinase kinase 5) (MEK kinase 5) (MEKK 5) (Apoptosis signal- regulating kinase 1) (ASK-1)                                              |  | 16.0799 | -18.97 | 0.009418 | 714  | 21 | 4 | 36 [+] |
| MAPK9  | Mitogen-activated protein kinase 9 (EC 2.7.11.24) (Stress-activated protein kinase JNK2) (c-Jun N-terminal kinase 2) (JNK-55)                                                                            |  | 16.3042 | -16.79 | 0.009444 | 657  | 18 | 1 | 29 [+] |
| MARCH9 | E3 ubiquitin-protein ligase MARCH9 (EC 6.3.2.-) (Membrane-associated RING finger protein 9) (Membrane-associated RING-CH protein IX) (MARCH-IX) (RING finger protein 179)                                |  | 16.302  | -19.05 | 0.009466 | 1000 | 21 | 3 | 24 [+] |
| MCM3   | DNA replication licensing factor MCM3 (DNA polymerase alpha holoenzyme-associated protein P1) (RLF subunit beta) (P102 protein) (P1-MCM3)                                                                |  | 16.3012 | -16.79 | 0.009474 | 658  | 23 | 2 | 39 [+] |

|        |                                                                                                                                           |  |         |        |          |      |    |   |        |
|--------|-------------------------------------------------------------------------------------------------------------------------------------------|--|---------|--------|----------|------|----|---|--------|
| MCM3   | DNA replication licensing factor MCM3 (DNA polymerase alpha holoenzyme-associated protein P1) (RLF subunit beta) (P102 protein) (P1-MCM3) |  | 16.2797 | -23.02 | 0.009736 | 429  | 16 | 1 | 38 [+] |
| MCM3AP | 80 kDa MCM3-associated protein (GANP protein)                                                                                             |  | 16.2735 | -23.64 | 0.009752 | 1000 | 14 | 1 | 16 [+] |
| MCM6   | DNA replication licensing factor MCM6 (p105MCM)                                                                                           |  | 14.0992 | -11.67 | 0.009847 | 218  | 12 | 5 | 38 [+] |
| MCM9   | Minichromosome maintenance protein domain containing 1                                                                                    |  | 14.554  | -8.95  | 0.009856 | 299  | 16 | 6 | 65 [+] |
| MDC1   | Mediator of DNA damage checkpoint protein 1 (Nuclear factor with BRCT domains 1)                                                          |  | 16.2599 | -18.25 | 0.009891 | 1000 | 11 | 1 | 14 [+] |
| MDC1   | Mediator of DNA damage checkpoint protein 1 (Nuclear factor with BRCT domains 1)                                                          |  | 16.2599 | -18.25 | 0.009891 | 1000 | 11 | 1 | 15 [+] |
| MED25  | ARC/mediator transcriptional coactivator subunit                                                                                          |  | 16.2596 | -18.41 | 0.009895 | 234  | 15 | 4 | 50 [+] |
| MED25  | ARC/mediator transcriptional coactivator subunit                                                                                          |  | 14.0462 | -14.75 | 0.009895 | 661  | 24 | 7 | 35 [+] |
| MEPE   | Matrix extracellular phosphoglycoprotein precursor (Osteoblast/osteocyte factor 45) (OF45)                                                |  | 14.7299 | -14.55 | 0.009934 | 1060 | 18 | 4 | 25 [+] |
| MFI2   | Melanotransferrin precursor (Melanoma-associated antigen p97) (CD228 antigen)                                                             |  | 16.2596 | -16.07 | 0.009944 | 130  | 5  | 2 | 12 [+] |
| MFSD7  | Major facilitator superfamily domain-containing protein 7 (Myosin light polypeptide 5 regulatory protein) (MYL5)                          |  | 14.7207 | -24.25 | 0.009947 | 1535 | 14 | 4 | 16 [+] |
| MFSD7  | Major facilitator superfamily domain-containing protein 7 (Myosin light polypeptide 5 regulatory protein) (MYL5)                          |  | 14.3266 | -12.64 | 0.010004 | 218  | 12 | 2 | 56 [+] |

|            |                                                                                                                                                                                           |  |         |        |          |      |    |   |        |
|------------|-------------------------------------------------------------------------------------------------------------------------------------------------------------------------------------------|--|---------|--------|----------|------|----|---|--------|
| MGST3      | Microsomal glutathione S-transferase 3 (EC 2.5.1.18) (Microsomal GST- 3) (Microsomal GST-III)                                                                                             |  | 15.5019 | -19.08 | 0.01011  | 1000 | 16 | 4 | 18 [+] |
| MID1       | Midline 1 (EC 6.3.2.-) (Tripartite motif-containing protein 18) (Putative transcription factor XPRF) (Midin) (RING finger protein 59) (Midline 1 RING finger protein)                     |  | 16.2348 | -23.02 | 0.010206 | 440  | 21 | 3 | 62 [+] |
| MKL1_HUMAN | MKL/myocardin-like protein 1 (Myocardin-related transcription factor A) (MRTF-A) (Megakaryoblastic leukemia 1 protein) (Megakaryocytic acute leukemia protein)                            |  | 16.2302 | -21.51 | 0.010255 | 1000 | 12 | 1 | 16 [+] |
| MLXIP      | MLX interacting protein                                                                                                                                                                   |  | 16.2283 | -22.22 | 0.010276 | 1424 | 9  | 1 | 9 [+]  |
| MME        | Neprilysin (EC 3.4.24.11) (Neutral endopeptidase) (NEP) (Enkephalinase) (Neutral endopeptidase 24.11) (Atriopeptidase) (Common acute lymphocytic leukemia antigen) (CALLA) (CD10 antigen) |  | 14.9682 | -18.29 | 0.010315 | 1358 | 12 | 3 | 14 [+] |
| MOG        | Myelin oligodendrocyte glycoprotein isoform alpha1 precursor                                                                                                                              |  | 16.2197 | -20.66 | 0.010369 | 604  | 15 | 1 | 25 [+] |
| MOG        | Myelin oligodendrocyte glycoprotein isoform alpha1 precursor                                                                                                                              |  | 14.554  | -12.18 | 0.010369 | 318  | 10 | 2 | 34 [+] |
| MOG        | Myelin oligodendrocyte glycoprotein isoform alpha1 precursor                                                                                                                              |  | 16.2024 | -22.35 | 0.010503 | 685  | 15 | 1 | 17 [+] |
| MOG        | Myelin oligodendrocyte glycoprotein isoform alpha1 precursor                                                                                                                              |  | 14.05   | -13.37 | 0.010514 | 859  | 22 | 9 | 36 [+] |
| MORC2      | MORC family CW-type zinc finger protein 2 (Zinc finger CW-type coiled-coil domain protein 1)                                                                                              |  | 14.5105 | -22.35 | 0.010698 | 2064 | 4  | 2 | 4 [+]  |
| MOSC1      | MOSC domain-containing protein 1, mitochondrial precursor (EC 1.-.-.-)                                                                                                                    |  | 14.8624 | -19.45 | 0.010752 | 458  | 18 | 2 | 47 [+] |

|          |                                                                                                                       |  |         |        |          |      |    |   |        |
|----------|-----------------------------------------------------------------------------------------------------------------------|--|---------|--------|----------|------|----|---|--------|
| MPDU1    | Mannose-P-dolichol utilization defect 1 protein (Suppressor of Lec15 and Lec35 glycosylation mutation homolog) (SL15) |  | 14.2017 | -16.05 | 0.010797 | 1000 | 22 | 5 | 30 [+] |
| MPDU1    | Mannose-P-dolichol utilization defect 1 protein (Suppressor of Lec15 and Lec35 glycosylation mutation homolog) (SL15) |  | 15.2705 | -11.9  | 0.010847 | 358  | 14 | 5 | 36 [+] |
| MR1      | Major histocompatibility complex, class I-related +C493                                                               |  | 14.0738 | -14.01 | 0.010983 | 405  | 19 | 9 | 58 [+] |
| MRFAP1L1 | Morf4 family associated protein 1-like 1                                                                              |  | 16.1512 | -22.35 | 0.01108  | 721  | 15 | 1 | 16 [+] |
| MRFAP1L1 | Morf4 family associated protein 1-like 1                                                                              |  | 16.1459 | -17.79 | 0.011204 | 121  | 6  | 2 | 33 [+] |
| MRPL37   | 39S ribosomal protein L37, mitochondrial precursor (L37mt) (MRP-L37)                                                  |  | 16.1459 | -12.46 | 0.011204 | 128  | 7  | 1 | 27 [+] |
| MRPS35   | 28S ribosomal protein S35, mitochondrial precursor (S35mt) (MRP-S35) (Mitochondrial ribosomal protein S28) (MRP-S28)  |  | 14.6476 | -13    | 0.011348 | 1119 | 19 | 6 | 28 [+] |
| MS4A5    | membrane-spanning 4-domains subfamily A member 5 (Testis-expressed transmembrane 4 protein) (CD20 antigen-like 2)     |  | 15.691  | -16.1  | 0.011692 | 273  | 17 | 8 | 76 [+] |
| MSI2     | RNA-binding protein Musashi homolog 2 (Musashi-2)                                                                     |  | 15.096  | -16.18 | 0.011726 | 1485 | 5  | 2 | 5 [+]  |
| MSL3L1   | Male-specific lethal 3-like 1 (MSL3-like 1) (Male-specific lethal-3 homolog 1)                                        |  | 16.1019 | -19.9  | 0.011733 | 1000 | 14 | 3 | 17 [+] |
| MSL3L1   | Male-specific lethal 3-like 1 (MSL3-like 1) (Male-specific lethal-3 homolog 1)                                        |  | 15.4636 | -12.46 | 0.011888 | 241  | 14 | 7 | 65 [+] |
| MT4      | Metallothionein-4 (MT-4) (Metallothionein-IV) (MT-IV)                                                                 |  | 14.0545 | -19.08 | 0.011902 | 1000 | 23 | 3 | 42 [+] |
| MTBP     | Mdm2, transformed 3T3 cell double minute 2, p53 binding protein binding protein                                       |  | 14.0992 | -16.6  | 0.012027 | 233  | 12 | 3 | 37 [+] |



|            |                                                                                                                                                                                                                     |         |        |          |      |    |    |        |
|------------|---------------------------------------------------------------------------------------------------------------------------------------------------------------------------------------------------------------------|---------|--------|----------|------|----|----|--------|
| MYH10      | Myosin-10 (Myosin heavy chain 10) (Myosin heavy chain, nonmuscle IIb) (Nonmuscle myosin heavy chain IIb) (NMMHC II-b) (NMMHC-IIb) (Cellular myosin heavy chain, type B) (Nonmuscle myosin heavy chain-B) (NMMHC- B) | 16.0684 | -16.23 | 0.01208  | 313  | 14 | 1  | 35 [+] |
| MYLE_HUMAN | Protein MYLE (Dexamethasone-induced protein)                                                                                                                                                                        | 14.4092 | -18.96 | 0.012138 | 656  | 22 | 6  | 36 [+] |
| MZF1       | Myeloid zinc finger 1 (MZF-1) (Zinc finger protein 42) (Zinc finger and SCAN domain-containing protein 6)                                                                                                           | 14.299  | -13.74 | 0.012145 | 2767 | 5  | 3  | 5 [+]  |
| NASP       | Nuclear autoantigenic sperm protein (NASP)                                                                                                                                                                          | 16.0679 | -20.51 | 0.012159 | 1087 | 8  | 1  | 10 [+] |
| NAT10      | N-acetyltransferase 10 (EC 2.3.1.-)                                                                                                                                                                                 | 15.5695 | -18.48 | 0.012229 | 443  | 19 | 6  | 39 [+] |
| NBPF6      | Neuroblastoma breakpoint family member 6 (Fragment)                                                                                                                                                                 | 16.0368 | -12.95 | 0.012483 | 384  | 16 | 4  | 60 [+] |
| NDUFS6     | NADH dehydrogenase [ubiquinone] iron-sulfur protein 6, mitochondrial precursor (EC 1.6.5.3) (EC 1.6.99.3) (NADH-ubiquinone oxidoreductase 13 kDa-A subunit) (Complex I-13kD-A) (CI-13kD-A)                          | 16.0322 | -22.2  | 0.012623 | 292  | 14 | 4  | 56 [+] |
| NEFL       | Neurofilament light polypeptide (NF-L) (Neurofilament triplet L protein) (68 kDa neurofilament protein)                                                                                                             | 16.0322 | -10.1  | 0.012623 | 225  | 12 | 1  | 35 [+] |
| NEK10      | Serine/threonine-protein kinase Nek10 (EC 2.7.11.1) (NimA-related protein kinase 10)                                                                                                                                | 16.0322 | -20.85 | 0.012623 | 157  | 9  | 3  | 45 [+] |
| NELL1      | Protein kinase C-binding protein NELL1 precursor (NEL-like protein 1) (Nel-related protein 1)                                                                                                                       | 14.554  | -10.17 | 0.012623 | 278  | 16 | 10 | 73 [+] |
| NELL1      | Protein kinase C-binding protein NELL1 precursor (NEL-like protein 1) (Nel-related protein 1)                                                                                                                       | 15.6019 | -19.97 | 0.012687 | 1000 | 21 | 5  | 27 [+] |

|                |                                                                                                                                              |         |        |          |      |    |   |        |
|----------------|----------------------------------------------------------------------------------------------------------------------------------------------|---------|--------|----------|------|----|---|--------|
| NFIB           | Nuclear factor 1 B-type (Nuclear factor 1/B) (NF1-B) (NFI-B) (NF-I/B) (CCAAT-box-binding transcription factor) (CTF) (TGGCA-binding protein) | 16.0261 | -20.25 | 0.012703 | 1002 | 13 | 1 | 14 [+] |
| NFIB           | Nuclear factor 1 B-type (Nuclear factor 1/B) (NF1-B) (NFI-B) (NF-I/B) (CCAAT-box-binding transcription factor) (CTF) (TGGCA-binding protein) | 16.0261 | -20.79 | 0.012704 | 301  | 17 | 5 | 53 [+] |
| NFIB           | Nuclear factor 1 B-type (Nuclear factor 1/B) (NF1-B) (NFI-B) (NF-I/B) (CCAAT-box-binding transcription factor) (CTF) (TGGCA-binding protein) | 14.3537 | -22.22 | 0.012972 | 1109 | 13 | 2 | 15 [+] |
| NFIL3          | Nuclear factor, interleukin 3 regulated                                                                                                      | 15.9973 | -15.41 | 0.013092 | 781  | 8  | 1 | 11 [+] |
| NFIL3          | Nuclear factor, interleukin 3 regulated                                                                                                      | 15.991  | -26.24 | 0.013093 | 1293 | 3  | 1 | 3 [+]  |
| NIPA2          | Non-imprinted in Prader-Willi/Angelman syndrome region protein 2                                                                             | 15.9805 | -17.55 | 0.013325 | 1000 | 20 | 2 | 30 [+] |
| NIT1           | Nitrilase homolog 1 (EC 3.5.-.-)                                                                                                             | 15.1273 | -18.69 | 0.013443 | 1199 | 14 | 3 | 18 [+] |
| NLRP6          | NACHT, LRR and PYD-containing protein 6 (PYRIN-containing APAF1-like protein 5)                                                              | 14.3366 | -17.26 | 0.013474 | 1000 | 23 | 5 | 25 [+] |
| NM_001031.4    | Ribosomal protein S28 (RPS28), mRNA                                                                                                          | 15.1597 | -10.36 | 0.013478 | 335  | 16 | 3 | 42 [+] |
| NM_001039690.2 | Chromosome transmission fidelity factor 8 homolog ( <i>S. cerevisiae</i> ) (CTF8), transcript variant 1, mRNA                                | 15.9673 | -16.69 | 0.013511 | 331  | 14 | 1 | 41 [+] |
| NMB            | Neuromedin-B precursor [Contains: Neuromedin-B-32; Neuromedin-B]                                                                             | 15.9662 | -15.82 | 0.013526 | 453  | 21 | 8 | 48 [+] |
| NOC4L          | Nucleolar complex protein 4 homolog (NOC4 protein homolog) (NOC4-like protein) (Nucleolar complex-associated protein 4-like protein)         | 15.9495 | -10.08 | 0.013671 | 487  | 19 | 5 | 38 [+] |
| NP_001001394.1 | HCG3 gene (HCG3), mRNA                                                                                                                       | 14.6677 | -11.49 | 0.013689 | 353  | 19 | 4 | 79 [+] |

|                    |                                                                                                         |  |         |        |          |      |    |   |        |
|--------------------|---------------------------------------------------------------------------------------------------------|--|---------|--------|----------|------|----|---|--------|
| NP_00100139<br>4.1 | HCG3 gene (HCG3), mRNA                                                                                  |  | 14.0992 | -12.67 | 0.013901 | 299  | 15 | 6 | 55 [+] |
| NP_00100170<br>7.1 | CDNA FLJ45974 fis, clone<br>PLACE7018452                                                                |  | 15.938  | -15.83 | 0.013932 | 316  | 18 | 2 | 54 [+] |
| NP_00100432<br>1.2 | CDNA FLJ45445 fis, clone<br>BRSSN2013696                                                                |  | 15.9212 | -17.13 | 0.014079 | 1052 | 7  | 1 | 8 [+]  |
| NP_00100547<br>2.1 | Similar to Laminin receptor 1<br>(LOC388524), mRNA                                                      |  | 15.9185 | -15.56 | 0.01422  | 139  | 6  | 1 | 26 [+] |
| NP_00100575<br>1.1 | Family with sequence similarity 21,<br>member A                                                         |  | 15.9185 | -11.56 | 0.01422  | 221  | 12 | 1 | 33 [+] |
| NP_00101088<br>6.1 | OTTHUMP00000016273 (Fragment)                                                                           |  | 15.9124 | -19.16 | 0.01431  | 301  | 17 | 1 | 52 [+] |
| NP_00101367<br>0.3 | Similar to hepatitis C virus core-binding<br>protein 6; cervical cancer oncogene 3<br>(LOC388965), mRNA |  | 15.0835 | -18.24 | 0.014313 | 680  | 20 | 5 | 30 [+] |
| NP_00101369<br>5.1 | CDNA FLJ42076 fis, clone<br>SYNOV2018921 (Hypothetical gene<br>supported by AK124070)                   |  | 14.5341 | -15.58 | 0.014385 | 564  | 20 | 5 | 41 [+] |
| NP_00101373<br>4.1 | CDNA FLJ41491 fis, clone<br>BRTHA2004978 (Hypothetical gene<br>supported by AK123485)                   |  | 14.3613 | -14.04 | 0.014396 | 446  | 25 | 5 | 62 [+] |
| NP_00101497<br>9.1 | Gene model 166, (NCBI) gene model<br>166, (NCBI) BY ORTHOLOGY<br>TO:ENSMUST00000072155                  |  | 15.8918 | -20.97 | 0.014516 | 1000 | 12 | 1 | 13 [+] |
| NP_00101797<br>5.3 | HFM1 protein                                                                                            |  | 15.8962 | -20.54 | 0.014556 | 443  | 12 | 1 | 21 [+] |
| NP_00101985<br>3.1 | NOT ANNOTATED                                                                                           |  | 15.8961 | -17.16 | 0.014557 | 416  | 16 | 1 | 47 [+] |
| NP_00102678<br>9.1 | similar to whnans-Deuren syndrome<br>critical region protein 19 (MGC119295),<br>cDNA                    |  | 14.9987 | -14.92 | 0.014563 | 885  | 22 | 6 | 33 [+] |
| NP_00102678<br>9.1 | similar to whnans-Deuren syndrome<br>critical region protein 19 (MGC119295),<br>cDNA                    |  | 14.9148 | -19.17 | 0.014578 | 1707 | 11 | 5 | 12 [+] |

|                    |                                                                                                           |  |         |        |          |      |    |   |        |
|--------------------|-----------------------------------------------------------------------------------------------------------|--|---------|--------|----------|------|----|---|--------|
| NP_00102883<br>0.1 | hypothetical protein LOC508592<br>hypothetical protein LOC508592 BY<br>ORTHOLOGY<br>TO:ENSBTAT00000023660 |  | 15.8865 | -18.1  | 0.014704 | 836  | 22 | 4 | 31 [+] |
| NP_00103001<br>6.1 | Similar to Williams Beuren syndrome<br>chromosome region 19 (LOC441251),<br>mRNA                          |  | 15.884  | -17.35 | 0.014743 | 506  | 19 | 1 | 38 [+] |
| NP_00103493<br>1.1 | RIKEN cDNA 1810049H13 gene RIKEN<br>cDNA 1810049H13 gene BY<br>ORTHOLOGY<br>TO:ENSMUST00000044007         |  | 15.8749 | -20.12 | 0.014884 | 577  | 20 | 4 | 32 [+] |
| NP_00103515<br>5.1 | similar to olfactory receptor 873 (PJCG6),<br>mRNA                                                        |  | 15.3499 | -18.75 | 0.015044 | 207  | 12 | 3 | 56 [+] |
| NP_00103609<br>6.1 | RIKEN cDNA 0610010E21 gene RIKEN<br>cDNA 0610010E21 gene BY<br>ORTHOLOGY<br>TO:ENSRNOT00000056877         |  | 15.6517 | -20.31 | 0.015181 | 468  | 18 | 7 | 43 [+] |
| NP_00103894<br>1.1 | WD repeat domain 38                                                                                       |  | 15.843  | -17.11 | 0.01539  | 1000 | 16 | 1 | 19 [+] |
| NP_00107397<br>6.1 | RIKEN cDNA 2410146L05 gene RIKEN<br>cDNA 2410146L05 gene BY<br>ORTHOLOGY<br>TO:ENSMUST00000034900         |  | 15.8416 | -15.44 | 0.015412 | 403  | 15 | 3 | 40 [+] |
| NP_00107400<br>8.1 | CDNA FLJ39660 fis, clone<br>SMINT2006801                                                                  |  | 15.7495 | -17.28 | 0.015749 | 425  | 18 | 3 | 45 [+] |
| NP_00107429<br>8.1 | CDC37-like                                                                                                |  | 15.8181 | -20.52 | 0.015795 | 526  | 19 | 3 | 49 [+] |
| NP_006324.1        | Nuclear DNA-binding protein                                                                               |  | 15.8146 | -22.85 | 0.015854 | 1000 | 13 | 3 | 15 [+] |
| NP_056996.2        | C8orfK32 protein (C8ORFK32), mRNA                                                                         |  | 15.8127 | -17.02 | 0.015885 | 465  | 19 | 1 | 36 [+] |
| NP_056996.2        | C8orfK32 protein (C8ORFK32), mRNA                                                                         |  | 15.8047 | -13.91 | 0.01589  | 181  | 9  | 1 | 29 [+] |
| NP_060358.2        | CDNA FLJ20581 fis, clone REC00491                                                                         |  | 15.8047 | -15.17 | 0.01589  | 225  | 9  | 3 | 25 [+] |
| NP_060380.2        | CDNA FLJ20628 fis, clone KAT03903                                                                         |  | 15.8047 | -15.17 | 0.01589  | 231  | 9  | 1 | 23 [+] |
| NP_060380.2        | CDNA FLJ20628 fis, clone KAT03903                                                                         |  | 15.7997 | -21.94 | 0.016102 | 2280 | 4  | 2 | 4 [+]  |

|              |                                                                                                                                                               |  |         |        |          |      |    |   |        |
|--------------|---------------------------------------------------------------------------------------------------------------------------------------------------------------|--|---------|--------|----------|------|----|---|--------|
| NP_061864.2  | STAG3-like                                                                                                                                                    |  | 15.799  | -18.98 | 0.016115 | 532  | 23 | 5 | 50 [+] |
| NP_061864.2  | STAG3-like                                                                                                                                                    |  | 15.7729 | -17.8  | 0.016425 | 1000 | 9  | 1 | 8 [+]  |
| NP_061900.1  | RNA-binding protein (FLJ20273), mRNA                                                                                                                          |  | 15.7795 | -17.16 | 0.016446 | 445  | 18 | 1 | 44 [+] |
| NP_061900.1  | RNA-binding protein (FLJ20273), mRNA                                                                                                                          |  | 15.768  | -19.92 | 0.016646 | 448  | 21 | 3 | 49 [+] |
| NP_061900.1  | RNA-binding protein (FLJ20273), mRNA                                                                                                                          |  | 15.764  | -17.01 | 0.016716 | 336  | 15 | 5 | 52 [+] |
| NP_079466.2  | KIAA1641 (KIAA1641), mRNA                                                                                                                                     |  | 15.764  | -19.16 | 0.016716 | 327  | 19 | 6 | 64 [+] |
| NP_877439.2  | Putative binding protein 7a5                                                                                                                                  |  | 15.763  | -20.05 | 0.016734 | 1000 | 14 | 1 | 15 [+] |
| NP_940865.1  | CDNA FLJ42117 fis, clone TESTI2005376 (FLJ42117 protein)                                                                                                      |  | 15.745  | -19.06 | 0.016907 | 1000 | 8  | 1 | 10 [+] |
| NP_950246.1  | NOT ANNOTATED                                                                                                                                                 |  | 15.749  | -17.16 | 0.01698  | 453  | 19 | 3 | 47 [+] |
| NP_955377.2  | Similar to phosphatidylinositol 4-kinase alpha (LOC375133), mRNA                                                                                              |  | 15.745  | -16.23 | 0.017051 | 973  | 11 | 1 | 11 [+] |
| NP_996849.2  | Similar to AVLV472 (MGC23985), mRNA                                                                                                                           |  | 15.7417 | -18.61 | 0.017109 | 1000 | 16 | 4 | 21 [+] |
| NP_997273.2  | CDNA FLJ45910 fis, clone PEBLM2003935                                                                                                                         |  | 15.7311 | -13.92 | 0.017153 | 363  | 18 | 1 | 36 [+] |
| NP_997327.1  | CDNA FLJ35695 fis, clone SPLEN2019709 (FLJ35695 protein)                                                                                                      |  | 15.7377 | -17.16 | 0.017181 | 456  | 19 | 1 | 43 [+] |
| NPEPL1       | Syntaxin-16 (Syn16)                                                                                                                                           |  | 15.7365 | -15.47 | 0.017203 | 1000 | 12 | 2 | 15 [+] |
| NPPA         | Atrial natriuretic factor precursor (ANF) (Atrial natriuretic peptide) (ANP) (Prepronatriodilatin) (CDD-ANF) [Contains: Cardiodilatin-related peptide (CDDP)] |  | 15.7265 | -16.63 | 0.017234 | 475  | 19 | 1 | 38 [+] |
| NR2E3        | Photoreceptor-specific nuclear receptor (Retina-specific nuclear receptor)                                                                                    |  | 15.7321 | -23.85 | 0.017283 | 1000 | 11 | 1 | 11 [+] |
| NSMCE4A      | Uncharacterized protein C10orf86                                                                                                                              |  | 15.4035 | -17.53 | 0.017393 | 2211 | 4  | 3 | 4 [+]  |
| NUP37        | Nucleoporin Nup37 (p37)                                                                                                                                       |  | 15.7257 | -13.19 | 0.017399 | 1005 | 4  | 1 | 4 [+]  |
| O15103_HUMAN | NOT ANNOTATED                                                                                                                                                 |  | 15.7163 | -14.97 | 0.017417 | 358  | 17 | 1 | 43 [+] |
| O15103_HUMAN | NOT ANNOTATED                                                                                                                                                 |  | 15.7212 | -20.58 | 0.017481 | 384  | 19 | 1 | 52 [+] |

|         |                                                                                                                                        |         |        |          |      |    |   |        |
|---------|----------------------------------------------------------------------------------------------------------------------------------------|---------|--------|----------|------|----|---|--------|
| OAS2    | 2'-5'-Oligoadenylate synthetase 2 (EC 2.7.7.-) ((2-5')oligo(A) synthetase 2) (2-5A synthetase 2) (p69 OAS / p71 OAS) (p69OAS / p71OAS) | 15.7096 | -15.14 | 0.017538 | 606  | 20 | 1 | 34 [+] |
| OCIAD1  | OCIA domain containing 1 isoform 1                                                                                                     | 15.7019 | -26.03 | 0.017837 | 1000 | 10 | 2 | 10 [+] |
| OCIAD1  | OCIA domain containing 1 isoform 1                                                                                                     | 14.2017 | -21.51 | 0.017873 | 1000 | 15 | 4 | 17 [+] |
| ODZ2    | Teneurin-2 (Ten-2) (Tenascin-M2) (Ten-m2) (Protein Odd Oz/ten-m homolog 2)                                                             | 15.691  | -15.81 | 0.017879 | 115  | 5  | 1 | 19 [+] |
| OLIG1   | Oligodendrocyte transcription factor 1 (Oligo1)                                                                                        | 14.7889 | -15.66 | 0.017907 | 513  | 24 | 3 | 43 [+] |
| OLIG1   | Oligodendrocyte transcription factor 1 (Oligo1)                                                                                        | 15.6952 | -16.55 | 0.017963 | 383  | 17 | 1 | 50 [+] |
| ONECUT1 | Hepatocyte nuclear factor 6 (HNF-6) (One cut domain family member 1)                                                                   | 15.691  | -11.26 | 0.018041 | 285  | 12 | 1 | 29 [+] |
| OR11H4  | Olfactory receptor 11H4 (Olfactory receptor OR14-36)                                                                                   | 15.691  | -17.5  | 0.018041 | 198  | 10 | 1 | 35 [+] |
| OR13D1  | Olfactory receptor 13D1                                                                                                                | 15.691  | -17.5  | 0.018041 | 197  | 10 | 1 | 35 [+] |
| OR1G1   | Olfactory receptor 1G1 (Olfactory receptor 17-209) (OR17-209)                                                                          | 15.691  | -8.36  | 0.018041 | 76   | 4  | 1 | 8 [+]  |
| OR1L4   | Olfactory receptor 1L4 (Olfactory receptor 9-E) (OR9-E) (OST046)                                                                       | 14.8018 | -19.89 | 0.018295 | 1000 | 27 | 6 | 42 [+] |
| OR2M3   | Olfactory receptor 2M3 (Olfactory receptor OR1-54)                                                                                     | 15.6684 | -16.07 | 0.018303 | 1597 | 4  | 1 | 4 [+]  |
| OR5I1   | Olfactory receptor 5I1 (Olfactory receptor OR11-159) (Olfactory receptor-like protein OLF1)                                            | 14.2017 | -25.01 | 0.018422 | 1000 | 10 | 2 | 14 [+] |
| OR6T1   | Olfactory receptor 6T1                                                                                                                 | 15.6619 | -16.07 | 0.018428 | 1604 | 4  | 1 | 4 [+]  |
| OR8I2   | Olfactory receptor 8I2 (Olfactory receptor OR11-170)                                                                                   | 15.6576 | -10.78 | 0.018508 | 487  | 20 | 9 | 55 [+] |
| OR8K5   | Olfactory receptor 8K5                                                                                                                 | 15.6632 | -18.62 | 0.018573 | 589  | 17 | 4 | 35 [+] |
| OR8S1   | Olfactory receptor 8S1                                                                                                                 | 15.646  | -16.07 | 0.018732 | 328  | 15 | 1 | 31 [+] |
| OR9G9   | Olfactory receptor 9G1                                                                                                                 | 15.6447 | -19.54 | 0.018758 | 1000 | 14 | 1 | 16 [+] |

|            |                                                                                                                                                       |         |        |          |      |    |   |          |
|------------|-------------------------------------------------------------------------------------------------------------------------------------------------------|---------|--------|----------|------|----|---|----------|
| OSBP2      | Oxysterol-binding protein 2 (Oxysterol-binding protein-related protein 4) (OSBP-related protein 4) (ORP-4)                                            | 15.1018 | -16.06 | 0.018901 | 1000 | 11 | 2 | 14 [ + ] |
| OSBP2      | Oxysterol-binding protein 2 (Oxysterol-binding protein-related protein 4) (OSBP-related protein 4) (ORP-4)                                            | 15.6463 | -13.62 | 0.018904 | 1000 | 12 | 1 | 13 [ + ] |
| OTOA       | Otoancorin precursor                                                                                                                                  | 15.6262 | -15.83 | 0.01912  | 377  | 19 | 1 | 46 [ + ] |
| OX26_HUMAN | Orexigenic neuropeptide QRFP precursor (P518) [Contains: QRF-amide (Pyroglutamylated arginine-phenylalanine-amide peptide) (Neuropeptide RF-amide)]   | 15.6216 | -16.85 | 0.019212 | 717  | 19 | 1 | 30 [ + ] |
| OXSM       | 3-oxoacyl-[acyl-carrier-protein] synthase, mitochondrial precursor (EC 2.3.1.41) (Beta-ketoacyl synthase)                                             | 15.3441 | -17.9  | 0.019566 | 475  | 17 | 5 | 27 [ + ] |
| P2RY1      | P2Y purinoceptor 1 (ATP receptor) (P2Y1) (Purinergic receptor)                                                                                        | 15.6019 | -16.98 | 0.019608 | 1000 | 12 | 1 | 10 [ + ] |
| PAH        | Phenylalanine-4-hydroxylase (EC 1.14.16.1) (PAH) (Phe-4- monooxygenase)                                                                               | 15.6019 | -16.98 | 0.019608 | 1000 | 11 | 1 | 9 [ + ]  |
| PAK6       | Serine/threonine-protein kinase PAK 6 (EC 2.7.11.1) (p21-activated kinase 6) (PAK-6) (PAK-5)                                                          | 15.6019 | -16.98 | 0.019608 | 1000 | 11 | 1 | 9 [ + ]  |
| PAQR6      | Progesterin and adipoQ receptor family member 6 (Progesterin and adipoQ receptor family member VI)                                                    | 15.5989 | -15.83 | 0.019667 | 383  | 18 | 1 | 46 [ + ] |
| PAQR6      | Progesterin and adipoQ receptor family member 6 (Progesterin and adipoQ receptor family member VI)                                                    | 15.6019 | -15.47 | 0.019802 | 1000 | 13 | 1 | 16 [ + ] |
| PARD3      | Partitioning-defective 3 homolog (PARD-3) (PAR-3) (Atypical PKC isotype-specific-interacting protein) (ASIP) (CTCL tumor antigen se2- 5) (PAR3-alpha) | 14.6989 | -20.85 | 0.019833 | 1148 | 15 | 2 | 18 [ + ] |

|         |                                                                                                                                                                                                            |         |        |          |      |    |    |          |
|---------|------------------------------------------------------------------------------------------------------------------------------------------------------------------------------------------------------------|---------|--------|----------|------|----|----|----------|
| PARP9   | Poly [ADP-ribose] polymerase 9 (EC 2.4.2.30) (PARP-9) (B aggressive lymphoma protein)                                                                                                                      | 15.3684 | -14.79 | 0.019915 | 569  | 19 | 5  | 39 [ + ] |
| PAX3    | Paired box protein Pax-3 (HUP2)                                                                                                                                                                            | 15.5862 | -15.18 | 0.019927 | 593  | 17 | 2  | 35 [ + ] |
| PCBP2   | Poly(rC)-binding protein 2 (Alpha-CP2) (hnRNP-E2)                                                                                                                                                          | 15.5773 | -11.67 | 0.020111 | 201  | 10 | 1  | 30 [ + ] |
| PCBP2   | Poly(rC)-binding protein 2 (Alpha-CP2) (hnRNP-E2)                                                                                                                                                          | 15.5576 | -18.71 | 0.020209 | 557  | 17 | 2  | 29 [ + ] |
| PCCA    | Propionyl-CoA carboxylase alpha chain, mitochondrial precursor (EC 6.4.1.3) (PCCase subunit alpha) (Propanoyl-CoA:carbon dioxide ligase subunit alpha)                                                     | 15.5773 | -17    | 0.020316 | 212  | 12 | 1  | 33 [ + ] |
| PCDH11Y | Protocadherin-11 Y-linked precursor (Protocadherin-11) (Protocadherin- 22) (Protocadherin on the Y chromosome) (PCDH-Y) (Protocadherin prostate cancer) (Protocadherin-PC)                                 | 14.1819 | -12.9  | 0.020519 | 973  | 18 | 10 | 21 [ + ] |
| PCSK6   | Proprotein convertase subtilisin/kexin type 6 precursor (EC 3.4.21.-) (Paired basic amino acid cleaving enzyme 4) (Subtilisin/kexin-like protease PACE4) (Subtilisin-like proprotein convertase 4) (SPCA4) | 15.5572 | -17.19 | 0.020749 | 905  | 18 | 8  | 21 [ + ] |
| PDCD10  | Programmed cell death protein 10 (TF-1 cell apoptosis-related protein 15) (Cerebral cavernous malformations 3 protein)                                                                                     | 15.5502 | -19.49 | 0.0209   | 394  | 21 | 7  | 68 [ + ] |
| PDK2    | [Pyruvate dehydrogenase [lipoamide]] kinase isozyme 2, mitochondrial precursor (EC 2.7.11.2) (Pyruvate dehydrogenase kinase isoform 2)                                                                     | 15.5317 | -17.51 | 0.021083 | 1000 | 10 | 1  | 9 [ + ]  |
| PDRG1   | p53 and DNA damage-regulated protein 1                                                                                                                                                                     | 15.1785 | -12.7  | 0.021442 | 378  | 20 | 5  | 52 [ + ] |



|         |                                                                                                                                                                                                                                                                |         |        |          |      |    |   |        |
|---------|----------------------------------------------------------------------------------------------------------------------------------------------------------------------------------------------------------------------------------------------------------------|---------|--------|----------|------|----|---|--------|
| PDSS1   | Decaprenyl-diphosphate synthase subunit 1 (EC 2.5.1.-) (Decaprenyl pyrophosphate synthetase subunit 1) (Trans-prenyltransferase) (TPT)                                                                                                                         | 15.4895 | -25.27 | 0.021682 | 1000 | 20 | 3 | 35 [+] |
| PDZD5B  | FRMPD2 related 2 isoform 2                                                                                                                                                                                                                                     | 15.5035 | -24.42 | 0.021705 | 1293 | 11 | 1 | 12 [+] |
| PELI3   | Protein pellino homolog 3 (Pellino-3)                                                                                                                                                                                                                          | 15.5019 | -18.97 | 0.021742 | 1000 | 13 | 1 | 15 [+] |
| PELI3   | Protein pellino homolog 3 (Pellino-3)                                                                                                                                                                                                                          | 15.5019 | -19.4  | 0.021742 | 1000 | 17 | 3 | 22 [+] |
| PENK    | Proenkephalin A precursor [Contains: Synenkephalin; Met-enkephalin (Opioid growth factor) (OGF); Met-enkephalin-Arg-Gly-Leu; Leu- enkephalin; Met-enkephalin-Arg-Phe]                                                                                          | 15.5019 | -16.79 | 0.021742 | 1000 | 10 | 1 | 13 [+] |
| PEX1    | Peroxisome biogenesis factor 1 (Peroxin-1) (Peroxisome biogenesis disorder protein 1)                                                                                                                                                                          | 15.3026 | -17.91 | 0.021747 | 1216 | 18 | 8 | 24 [+] |
| PEX1    | Peroxisome biogenesis factor 1 (Peroxin-1) (Peroxisome biogenesis disorder protein 1)                                                                                                                                                                          | 15.5109 | -19.53 | 0.021776 | 378  | 19 | 1 | 42 [+] |
| PFDN5   | Prefoldin subunit 5 (C-myc-binding protein Mm-1) (Myc modulator 1)                                                                                                                                                                                             | 15.4641 | -27.65 | 0.021873 | 844  | 24 | 6 | 37 [+] |
| PHACTR1 | Phosphatase and actin regulator 1                                                                                                                                                                                                                              | 15.4944 | -18.97 | 0.021909 | 1000 | 11 | 1 | 9 [+]  |
| PHACTR4 | phosphatase and actin regulator 4 isoform 1                                                                                                                                                                                                                    | 15.5019 | -16.08 | 0.021981 | 1000 | 9  | 2 | 11 [+] |
| PHF8    | PHD finger protein 8                                                                                                                                                                                                                                           | 15.4884 | -18    | 0.022046 | 1320 | 4  | 1 | 4 [+]  |
| PIAS2   | E3 SUMO-protein ligase PIAS2 (Protein inhibitor of activated STAT2) (Protein inhibitor of activated STAT x) (Msx-interacting zinc finger protein) (Miz1) (DAB2-interacting protein) (DIP) (Androgen receptor- interacting protein 3) (ARIP3) (PIAS-NY protein) | 15.4857 | -16.74 | 0.022107 | 651  | 14 | 1 | 18 [+] |
| PIGG    | GPI ethanolamine phosphate transferase 2 (EC 2.-.-.-) (Phosphatidylinositol-glycan biosynthesis class G protein) (PIG-G) (GPI7 homolog) (hGPI7)                                                                                                                | 15.4636 | -14.57 | 0.022616 | 258  | 12 | 1 | 31 [+] |

|        |                                                                                                                                                |         |        |          |      |    |   |        |
|--------|------------------------------------------------------------------------------------------------------------------------------------------------|---------|--------|----------|------|----|---|--------|
| PIGG   | GPI ethanolamine phosphate transferase 2 (EC 2.-.-.) (Phosphatidylinositol-glycan biosynthesis class G protein) (PIG-G) (GPI7 homolog) (hGPI7) | 15.4636 | -13.52 | 0.022616 | 215  | 12 | 1 | 44 [+] |
| PIGG   | GPI ethanolamine phosphate transferase 2 (EC 2.-.-.) (Phosphatidylinositol-glycan biosynthesis class G protein) (PIG-G) (GPI7 homolog) (hGPI7) | 15.4636 | -14.81 | 0.022616 | 216  | 12 | 4 | 50 [+] |
| PIGN   | GPI ethanolamine phosphate transferase 1 (EC 2.-.-.) (Phosphatidylinositol-glycan biosynthesis class N protein) (PIG-N) (MCD4 homolog)         | 15.474  | -19.49 | 0.02263  | 412  | 20 | 1 | 46 [+] |
| PIGT   | GPI transamidase component PIG-T precursor (Phosphatidylinositol- glycan biosynthesis class T protein)                                         | 15.1891 | -14.67 | 0.022666 | 897  | 24 | 5 | 35 [+] |
| PIGT   | GPI transamidase component PIG-T precursor (Phosphatidylinositol- glycan biosynthesis class T protein)                                         | 14.5057 | -10.6  | 0.022858 | 407  | 17 | 8 | 55 [+] |
| PIGT   | GPI transamidase component PIG-T precursor (Phosphatidylinositol- glycan biosynthesis class T protein)                                         | 15.4636 | -24.12 | 0.022876 | 159  | 10 | 8 | 35 [+] |
| PIK3R3 | Phosphatidylinositol 3-kinase regulatory subunit gamma (PI3-kinase p85-subunit gamma) (PtdIns-3-kinase p85-gamma) (p55PIK)                     | 15.4636 | -16.76 | 0.022876 | 55   | 2  | 1 | 4 [+]  |
| PJA1   | E3 ubiquitin-protein ligase Praja1 (EC 6.3.2.-) (Praja-1) (RING finger protein 70)                                                             | 15.4636 | -14.93 | 0.022876 | 264  | 15 | 4 | 62 [+] |
| PJA1   | E3 ubiquitin-protein ligase Praja1 (EC 6.3.2.-) (Praja-1) (RING finger protein 70)                                                             | 15.4636 | -12.71 | 0.022876 | 131  | 6  | 1 | 23 [+] |
| PJA1   | E3 ubiquitin-protein ligase Praja1 (EC 6.3.2.-) (Praja-1) (RING finger protein 70)                                                             | 15.4636 | -20.91 | 0.022876 | 140  | 7  | 1 | 19 [+] |
| PJA1   | E3 ubiquitin-protein ligase Praja1 (EC 6.3.2.-) (Praja-1) (RING finger protein 70)                                                             | 15.4457 | -17.4  | 0.023037 | 1000 | 11 | 1 | 15 [+] |

|          |                                                                                                                                            |         |        |          |      |    |    |        |
|----------|--------------------------------------------------------------------------------------------------------------------------------------------|---------|--------|----------|------|----|----|--------|
| PLEKHA3  | Pleckstrin homology domain-containing family A member 3 (Phosphoinositol 4-phosphate adaptor protein 1) (FAPP-1)                           | 15.4425 | -17.4  | 0.023113 | 1000 | 11 | 1  | 14 [+] |
| PNPLA1   | Patatin-like phospholipase domain containing 1 isoform 1                                                                                   | 15.4347 | -17.79 | 0.0233   | 622  | 21 | 1  | 27 [+] |
| PNPLA1   | Patatin-like phospholipase domain containing 1 isoform 1                                                                                   | 14.0729 | -21.18 | 0.023425 | 5000 | 4  | 2  | 4 [+]  |
| POLR1C   | DNA-directed RNA polymerase I 40 kDa polypeptide (EC 2.7.7.6) (RPA40) (RPA39)                                                              | 15.4283 | -16.3  | 0.023454 | 1000 | 7  | 1  | 7 [+]  |
| POP7     | Ribonuclease P protein subunit p20 (EC 3.1.26.5) (RNaseP protein p20) (hPOP7)                                                              | 14.9644 | -19.93 | 0.023473 | 959  | 12 | 5  | 12 [+] |
| POR      | NADPH--cytochrome P450 reductase (EC 1.6.2.4) (CPR) (P450R)                                                                                | 15.4315 | -17.23 | 0.023656 | 1000 | 13 | 1  | 18 [+] |
| PPIL1    | Peptidyl-prolyl cis-trans isomerase-like 1 (EC 5.2.1.8) (PPIase) (Rotamase)                                                                | 15.418  | -23.46 | 0.023704 | 1798 | 2  | 1  | 3 [+]  |
| PPM1G    | Protein phosphatase 2C isoform gamma (EC 3.1.3.16) (PP2C-gamma) (Protein phosphatase magnesium-dependent 1 gamma) (Protein phosphatase 1C) | 15.4115 | -17.79 | 0.023865 | 631  | 20 | 1  | 27 [+] |
| PPP1CC   | Serine/threonine-protein phosphatase PP1-gamma catalytic subunit (EC 3.1.3.16) (PP-1G) (Protein phosphatase 1C catalytic subunit)          | 15.4137 | -16.36 | 0.024098 | 1000 | 19 | 3  | 26 [+] |
| PPP3R1   | Calcineurin subunit B isoform 1 (Protein phosphatase 2B regulatory subunit 1) (Protein phosphatase 3 regulatory subunit B alpha isoform 1) | 15.4019 | -20.5  | 0.024397 | 1000 | 10 | 1  | 10 [+] |
| PRAF2    | PRA1 family protein 2                                                                                                                      | 15.3894 | -13.52 | 0.024413 | 344  | 17 | 1  | 66 [+] |
| PRAMEF11 | PRAME family member 11 (Fragment)                                                                                                          | 15.3873 | -23.29 | 0.024466 | 1000 | 16 | 1  | 19 [+] |
| PRAMEF15 | PRAME family member 9                                                                                                                      | 15.3873 | -23.29 | 0.024466 | 1000 | 16 | 1  | 19 [+] |
| PRAMEF4  | PRAME family member 4                                                                                                                      | 14.4403 | -9.9   | 0.024492 | 178  | 9  | 10 | 43 [+] |
| PRAMEF4  | PRAME family member 4                                                                                                                      | 15.3894 | -18.65 | 0.024715 | 1148 | 13 | 1  | 14 [+] |
| PRAMEF5  | PRAME family member 5                                                                                                                      | 14.0329 | -20.08 | 0.024867 | 2308 | 5  | 2  | 5 [+]  |

|         |                                                                                                                                                                                |  |         |        |          |      |    |   |        |
|---------|--------------------------------------------------------------------------------------------------------------------------------------------------------------------------------|--|---------|--------|----------|------|----|---|--------|
| PRAMEF6 | PRAME family member 6                                                                                                                                                          |  | 15.3678 | -17.4  | 0.024962 | 1000 | 20 | 2 | 25 [+] |
| PRAMEF6 | PRAME family member 6                                                                                                                                                          |  | 15.3662 | -18.47 | 0.025003 | 1000 | 7  | 1 | 10 [+] |
| PRAMEF9 | PRAME family member 9                                                                                                                                                          |  | 15.362  | -19.99 | 0.025111 | 901  | 10 | 1 | 11 [+] |
| PRAMEF9 | PRAME family member 9                                                                                                                                                          |  | 15.362  | -19.99 | 0.025111 | 901  | 10 | 1 | 11 [+] |
| PRCP    | Lysosomal Pro-X carboxypeptidase precursor (EC 3.4.16.2) (Prolylcarboxypeptidase) (PRCP) (Proline carboxypeptidase) (Angiotensinase C) (Lysosomal carboxypeptidase             |  | 15.3682 | -22.23 | 0.025267 | 2171 | 2  | 1 | 2 [+]  |
| PRMT5   | Protein arginine N-methyltransferase 5 (EC 2.1.1.125) (EC 2.1.1.-) (Shk1 kinase-binding protein 1 homolog) (SKB1Hs) (Jak-binding protein 1) (72 kDa ICln-binding protein)      |  | 15.3669 | -12.88 | 0.025301 | 439  | 18 | 1 | 42 [+] |
| PROL1   | Proline-rich protein 1 precursor (PRL1) (Basic proline-rich lacrimal protein)                                                                                                  |  | 15.3499 | -15.44 | 0.025424 | 188  | 11 | 4 | 33 [+] |
| PROP1   | Homeobox protein prophet of Pit-1 (PROP-1) (Pituitary-specific homeodomain factor)                                                                                             |  | 15.3499 | -10.76 | 0.025424 | 254  | 13 | 1 | 49 [+] |
| PROSC   | Proline synthetase co-transcribed bacterial homolog protein                                                                                                                    |  | 14.7053 | -17.79 | 0.025458 | 597  | 21 | 9 | 49 [+] |
| PRPH    | Peripherin                                                                                                                                                                     |  | 15.3465 | -23.03 | 0.025514 | 1436 | 6  | 1 | 6 [+]  |
| PRPSAP2 | Phosphoribosyl pyrophosphate synthetase-associated protein 2 (PRPP synthetase-associated protein 2) (41 kDa phosphoribosylpyrophosphate synthetase-associated protein) (PAP41) |  | 15.3423 | -25.44 | 0.025624 | 1899 | 4  | 3 | 4 [+]  |
| PRR6    | Proline-rich protein 6 (Nuclear protein p30)                                                                                                                                   |  | 15.3499 | -12.07 | 0.025753 | 255  | 15 | 1 | 39 [+] |
| PRUNE   | prune homolog                                                                                                                                                                  |  | 15.3499 | -12.07 | 0.025753 | 119  | 8  | 1 | 21 [+] |
| PRUNE   | prune homolog                                                                                                                                                                  |  | 15.3499 | -11.58 | 0.025753 | 98   | 6  | 6 | 19 [+] |
| PRUNE   | prune homolog                                                                                                                                                                  |  | 15.3499 | -12.07 | 0.025753 | 143  | 8  | 1 | 22 [+] |
| PRX     | Periaxin                                                                                                                                                                       |  | 15.3499 | -16.34 | 0.025753 | 119  | 6  | 6 | 22 [+] |
| PRY     | PTPN13-like protein, Y-linked (Testis-specific PTP-BL-related Y protein)                                                                                                       |  | 15.3499 | -11.58 | 0.025753 | 100  | 6  | 1 | 18 [+] |

|              |                                                                                                                                    |  |         |        |          |      |    |   |          |
|--------------|------------------------------------------------------------------------------------------------------------------------------------|--|---------|--------|----------|------|----|---|----------|
| PSMA7        | Proteasome subunit alpha type 7 (EC 3.4.25.1) (Proteasome subunit RC6- 1) (Proteasome subunit XAPC7)                               |  | 15.3499 | -16.82 | 0.025753 | 210  | 10 | 1 | 33 [ + ] |
| PSMC6        | 26S protease regulatory subunit S10B (Proteasome 26S subunit ATPase 6) (Proteasome subunit p42)                                    |  | 15.3499 | -13.77 | 0.025753 | 258  | 12 | 5 | 38 [ + ] |
| PSMD13       | 26S proteasome non-ATPase regulatory subunit 13 (26S proteasome regulatory subunit S11) (26S proteasome regulatory subunit p40.5)  |  | 15.346  | -16.08 | 0.02586  | 1261 | 10 | 1 | 10 [ + ] |
| PTH1H        | Parathyroid hormone-related protein precursor (PTH-rP) (PTHrP) [Contains: PTHrP[1-36]; PTHrP[38-94]; Osteostatin (PTHrP[107-139])] |  | 15.3331 | -17    | 0.025868 | 950  | 14 | 1 | 18 [ + ] |
| PTPRK        | Receptor-type tyrosine-protein phosphatase kappa precursor (EC 3.1.3.48) (Protein-tyrosine phosphatase kappa) (R-PTP-kappa)        |  | 15.3281 | -14.68 | 0.026    | 1000 | 15 | 2 | 13 [ + ] |
| PUS7L        | pseudouridylate synthase 7 homolog (S. cerevisiae)-like                                                                            |  | 15.3271 | -17.16 | 0.026027 | 623  | 16 | 1 | 22 [ + ] |
| PVRL2        | Poliovirus receptor-related protein 2 precursor (Herpes virus entry mediator B) (HveB) (Nectin-2) (CD112 antigen)                  |  | 15.3203 | -20.15 | 0.026209 | 1000 | 15 | 4 | 19 [ + ] |
| PXT1         | peroxisomal, testis specific 1                                                                                                     |  | 14.3881 | -11.07 | 0.026222 | 409  | 19 | 8 | 44 [ + ] |
| PYCR2        | Pyrroline-5-carboxylate reductase 2 (EC 1.5.1.2) (P5CR 2) (P5C reductase 2)                                                        |  | 15.3234 | -20.13 | 0.026473 | 1000 | 11 | 1 | 8 [ + ]  |
| Q15288_HUMAN | No distinctive protein motifs; ORF                                                                                                 |  | 14.324  | -10.34 | 0.026554 | 426  | 21 | 4 | 77 [ + ] |
| Q15494_HUMAN | SMPD1 protein                                                                                                                      |  | 14.1752 | -10.09 | 0.026604 | 437  | 22 | 6 | 50 [ + ] |
| Q15495_HUMAN | SMPD1 protein                                                                                                                      |  | 15.3184 | -17.12 | 0.026613 | 1056 | 16 | 4 | 20 [ + ] |
| Q5JVI1_HUMAN | Novel protein (Fragment)                                                                                                           |  | 15.3018 | -18.25 | 0.026712 | 1000 | 10 | 1 | 11 [ + ] |

|              |                                                                                           |  |         |        |          |      |    |   |        |
|--------------|-------------------------------------------------------------------------------------------|--|---------|--------|----------|------|----|---|--------|
| Q5QHF1_HUMAN | C20orf199 protein (Fragment)                                                              |  | 15.3018 | -15.16 | 0.026712 | 1000 | 8  | 1 | 10 [+] |
| Q5TBN0_HUMAN | Similar to Leucine-rich repeat protein SHOC-2 (Ras-binding protein Sur-8) (Fragment)      |  | 15.3018 | -13.5  | 0.026712 | 1000 | 22 | 3 | 22 [+] |
| Q66K37_HUMAN | NOT ANNOTATED                                                                             |  | 15.3018 | -18.74 | 0.026712 | 1000 | 18 | 3 | 23 [+] |
| Q6AI40_HUMAN | NOT ANNOTATED                                                                             |  | 15.3018 | -19.26 | 0.026712 | 1000 | 10 | 1 | 15 [+] |
| Q6IC07_HUMAN | RFPL1S protein                                                                            |  | 15.3018 | -21.34 | 0.026712 | 1000 | 19 | 5 | 26 [+] |
| Q6P094_HUMAN | NOT ANNOTATED                                                                             |  | 15.3014 | -16.08 | 0.026723 | 1000 | 15 | 2 | 15 [+] |
| Q6ZNL0_HUMAN | NOT ANNOTATED                                                                             |  | 14.7018 | -17.2  | 0.026731 | 1000 | 28 | 6 | 40 [+] |
| Q6ZPB5_HUMAN | CDNA FLJ26122 fis, clone SYN00634                                                         |  | 15.2999 | -14.67 | 0.026766 | 823  | 17 | 1 | 21 [+] |
| Q6ZR49_HUMAN | CDNA FLJ46647 fis, clone TRACH3004288                                                     |  | 15.2956 | -17    | 0.026883 | 971  | 21 | 7 | 31 [+] |
| Q6ZR85_HUMAN | CDNA FLJ46558 fis, clone THYMU3040068                                                     |  | 15.3075 | -17.91 | 0.026915 | 1212 | 7  | 1 | 10 [+] |
| Q6ZRI4_HUMAN | CDNA FLJ46339 fis, clone TESTI4046450                                                     |  | 15.2923 | -17.48 | 0.026974 | 827  | 21 | 5 | 27 [+] |
| Q6ZRI9_HUMAN | CDNA FLJ46326 fis, clone TESTI4043378                                                     |  | 15.3029 | -12.01 | 0.027046 | 734  | 16 | 1 | 30 [+] |
| Q6ZRU5_HUMAN | CDNA FLJ46089 fis, clone TESTI2011020                                                     |  | 15.2893 | -9.82  | 0.027059 | 378  | 20 | 2 | 58 [+] |
| Q6ZSV9_HUMAN | CDNA FLJ45174 fis, clone BRAWH3046209                                                     |  | 15.3018 | -19.75 | 0.027075 | 1000 | 13 | 1 | 14 [+] |
| Q6ZU65_HUMAN | CDNA FLJ43968 fis, clone TESTI4017543, weakly similar to Homo sapiens ubinuclein 1 (UBN1) |  | 15.2886 | -12.47 | 0.027077 | 431  | 20 | 4 | 39 [+] |
| Q6ZV65_HUMAN | CDNA FLJ42946 fis, clone BRSTN2005721                                                     |  | 15.2856 | -19.29 | 0.027162 | 2252 | 2  | 1 | 2 [+]  |

|              |                                                              |  |         |        |          |      |    |    |        |
|--------------|--------------------------------------------------------------|--|---------|--------|----------|------|----|----|--------|
| Q6ZVR1_HUMAN | CDNA FLJ42200 fis, clone THYMU2034647                        |  | 15.2958 | -17.43 | 0.027245 | 724  | 25 | 4  | 41 [+] |
| Q6ZW03_HUMAN | CDNA FLJ41849 fis, clone NT2RI3003409                        |  | 15.2782 | -17.92 | 0.027369 | 1000 | 11 | 1  | 13 [+] |
| Q6ZWB7_HUMAN | CDNA FLJ41352 fis, clone BRAWH2014645                        |  | 15.2897 | -14.56 | 0.02742  | 1046 | 20 | 4  | 25 [+] |
| Q6ZWG0_HUMAN | CDNA FLJ41161 fis, clone BRACE2039475                        |  | 15.2717 | -13.89 | 0.027549 | 838  | 15 | 5  | 19 [+] |
| Q86XA1_HUMAN | NOT ANNOTATED                                                |  | 15.2655 | -15.09 | 0.027725 | 818  | 15 | 1  | 16 [+] |
| Q8IVY7_HUMAN | MGC52282 protein                                             |  | 15.2641 | -18.27 | 0.027766 | 648  | 15 | 1  | 20 [+] |
| Q8IZM0_HUMAN | Putative anti-CNG alpha 1 cation channel translation product |  | 15.1223 | -13.74 | 0.027912 | 630  | 23 | 3  | 33 [+] |
| Q8N0S4_HUMAN | KIR3DX1 protein                                              |  | 14.231  | -17.97 | 0.027917 | 599  | 21 | 6  | 40 [+] |
| Q8N4X1_HUMAN | NOT ANNOTATED                                                |  | 14.4773 | -17.46 | 0.027929 | 1067 | 16 | 4  | 20 [+] |
| Q8N642_HUMAN | HCG2020170                                                   |  | 15.2493 | -19.79 | 0.02819  | 1749 | 6  | 2  | 8 [+]  |
| Q8N793_HUMAN | CDNA FLJ25895 fis, clone CBR03553                            |  | 14.0654 | -10.59 | 0.028457 | 504  | 19 | 10 | 46 [+] |
| Q8N793_HUMAN | CDNA FLJ25895 fis, clone CBR03553                            |  | 15.2362 | -11.89 | 0.028571 | 168  | 9  | 1  | 27 [+] |
| Q8N7E7_HUMAN | CDNA FLJ25715 fis, clone TST05160                            |  | 15.2362 | -13.38 | 0.028571 | 267  | 14 | 8  | 55 [+] |
| Q8N8T0_HUMAN | CDNA FLJ38911 fis, clone NT2NE2007220                        |  | 15.2362 | -9.69  | 0.028571 | 300  | 14 | 1  | 33 [+] |
| Q8NAM9_HUMAN | CDNA FLJ35099 fis, clone PLACE6006287                        |  | 15.2362 | -9.69  | 0.028571 | 295  | 13 | 1  | 31 [+] |
| Q8NAQ8_HUMAN | CDNA FLJ34945 fis, clone NT2RP7008454                        |  | 15.2362 | -9.69  | 0.028571 | 300  | 15 | 1  | 32 [+] |

|              |                                                                                                                                                           |  |         |        |          |      |    |   |        |
|--------------|-----------------------------------------------------------------------------------------------------------------------------------------------------------|--|---------|--------|----------|------|----|---|--------|
| Q8NAV9_HUMAN | CDNA FLJ34690 fis, clone MESAN2000894                                                                                                                     |  | 15.2362 | -11.89 | 0.028571 | 169  | 9  | 1 | 28 [+] |
| Q8NCK2_HUMAN | CDNA FLJ90199 fis, clone MAMMA1001609                                                                                                                     |  | 15.2362 | -9.69  | 0.028571 | 300  | 14 | 1 | 35 [+] |
| Q8NDA8_HUMAN | CDNA FLJ35542 fis, clone SPLEN2002917                                                                                                                     |  | 15.2361 | -24.22 | 0.028576 | 1563 | 6  | 1 | 5 [+]  |
| Q8NF02_HUMAN | NOT ANNOTATED                                                                                                                                             |  | 15.2361 | -10.79 | 0.028576 | 475  | 15 | 1 | 28 [+] |
| Q8NFD4_HUMAN | NOT ANNOTATED                                                                                                                                             |  | 15.2354 | -24.12 | 0.028595 | 445  | 16 | 1 | 25 [+] |
| Q8NH58_HUMAN | Seven transmembrane helix receptor                                                                                                                        |  | 15.228  | -14.29 | 0.028814 | 922  | 18 | 1 | 25 [+] |
| Q8NHB0_HUMAN | Seven transmembrane helix receptor                                                                                                                        |  | 14.4197 | -20.77 | 0.02883  | 1258 | 8  | 3 | 9 [+]  |
| Q8NHC1_HUMAN | Seven transmembrane helix receptor                                                                                                                        |  | 15.2403 | -19.9  | 0.028865 | 1760 | 3  | 1 | 3 [+]  |
| Q8NHC2_HUMAN | Seven transmembrane helix receptor                                                                                                                        |  | 15.2362 | -21.31 | 0.028987 | 203  | 13 | 1 | 36 [+] |
| Q8TF27_HUMAN | NOT ANNOTATED                                                                                                                                             |  | 15.2362 | -11.97 | 0.028987 | 122  | 8  | 2 | 21 [+] |
| Q8WUP8_HUMAN | MGC21881 protein (Fragment)                                                                                                                               |  | 15.2229 | -18.6  | 0.029392 | 677  | 9  | 1 | 11 [+] |
| Q969L1_HUMAN | NOT ANNOTATED                                                                                                                                             |  | 14.1722 | -17.73 | 0.029489 | 1354 | 19 | 4 | 25 [+] |
| Q96CK5_HUMAN | Homolog of Homo sapiens "PREDICTED "KIAA0226 gene product "Homolog of Homo sapiens "PREDICTED "KIAA0226 gene product " BY ORTHOLOGY TO:SINFRUT00000163195 |  | 15.1797 | -22.54 | 0.029504 | 1098 | 22 | 5 | 23 [+] |
| Q96GK3_HUMAN | KIF26A protein                                                                                                                                            |  | 15.2176 | -20.35 | 0.029555 | 527  | 17 | 1 | 27 [+] |
| Q96GK3_HUMAN | KIF26A protein                                                                                                                                            |  | 15.2172 | -13.47 | 0.029567 | 1000 | 14 | 1 | 24 [+] |



|              |                                                                                                                               |  |         |        |          |      |    |   |        |
|--------------|-------------------------------------------------------------------------------------------------------------------------------|--|---------|--------|----------|------|----|---|--------|
| Q96LL3_HUMAN | CDNA FLJ25404 fis, clone TST02888 (Hypothetical protein FLJ25404)                                                             |  | 15.2171 | -20.57 | 0.029568 | 1000 | 20 | 2 | 26 [+] |
| Q96NA0_HUMAN | CDNA FLJ31197 fis, clone KIDNE2000519, weakly similar to TONB PROTEIN                                                         |  | 15.2018 | -17.2  | 0.029595 | 1000 | 13 | 1 | 16 [+] |
| Q9BVM4_HUMAN | LOC87769 protein (OTTHUMP00000018653)                                                                                         |  | 15.2009 | -12.7  | 0.029623 | 373  | 18 | 1 | 39 [+] |
| Q9BXZ2_HUMAN | Connexin                                                                                                                      |  | 15.1995 | -21.19 | 0.029664 | 1357 | 16 | 5 | 21 [+] |
| Q9H385_HUMAN | NOT ANNOTATED                                                                                                                 |  | 15.2072 | -11.93 | 0.029874 | 766  | 17 | 1 | 21 [+] |
| Q9HBF5_HUMAN | Cervical cancer suppressor-1                                                                                                  |  | 15.191  | -14.51 | 0.029925 | 454  | 16 | 1 | 33 [+] |
| Q9NXP9_HUMAN | CDNA FLJ20123 fis, clone COL06041                                                                                             |  | 15.2018 | -16.92 | 0.030042 | 1000 | 20 | 1 | 22 [+] |
| Q9P156_HUMAN | NOT ANNOTATED                                                                                                                 |  | 15.2003 | -20.59 | 0.030089 | 1001 | 18 | 1 | 19 [+] |
| Q9P1I1_HUMAN | NOT ANNOTATED                                                                                                                 |  | 15.1456 | -15.6  | 0.030217 | 746  | 11 | 2 | 19 [+] |
| QRICH1       | Glutamine-rich protein 1                                                                                                      |  | 14.4403 | -14.26 | 0.030258 | 327  | 14 | 4 | 53 [+] |
| RAB3GAP1     | Rab3 GTPase-activating protein catalytic subunit (RAB3 GTPase- activating protein 130 kDa subunit) (Rab3-GAP p130) (Rab3-GAP) |  | 14.8892 | -14.82 | 0.030261 | 551  | 26 | 3 | 36 [+] |
| RAB42        | Putative Ras-related protein Rab-42                                                                                           |  | 15.1797 | -20.15 | 0.030273 | 1000 | 10 | 1 | 11 [+] |
| RAC2         | Ras-related C3 botulinum toxin substrate 2 precursor (p21-Rac2) (Small G protein) (GX)                                        |  | 15.1924 | -10.88 | 0.030338 | 521  | 14 | 1 | 21 [+] |
| RAD51L1      | DNA repair protein RAD51 homolog 2 (R51H2) (RAD51-like protein 1) (Rad51B)                                                    |  | 15.1717 | -23.38 | 0.030521 | 433  | 17 | 8 | 46 [+] |
| RAF1         | RAF proto-oncogene serine/threonine-protein kinase (EC 2.7.11.1) (Raf- 1) (C-RAF) (cRaf)                                      |  | 15.1701 | -13.31 | 0.030572 | 1000 | 11 | 1 | 11 [+] |

|               |                                                                                                                                                                                   |                |               |                 |            |           |          |                 |
|---------------|-----------------------------------------------------------------------------------------------------------------------------------------------------------------------------------|----------------|---------------|-----------------|------------|-----------|----------|-----------------|
| RANBP9        | Ran-binding protein 9 (RanBP9) (RanBP7) (Ran-binding protein M) (RanBPM) (BPM90) (BPM-L)                                                                                          | 15.1804        | -14.96        | 0.030717        | 1000       | 14        | 1        | 20 [ + ]        |
| RARRES1       | Retinoic acid receptor responder protein 1 (Tazarotene-induced gene 1 protein) (RAR-responsive protein TIG1)                                                                      | 15.1616        | -14.67        | 0.030839        | 900        | 14        | 1        | 16 [ + ]        |
| <b>RASIP1</b> | <b>Ras-interacting protein 1 (Rain)</b>                                                                                                                                           | <b>14.9314</b> | <b>-11.98</b> | <b>0.030989</b> | <b>368</b> | <b>19</b> | <b>3</b> | <b>54 [ + ]</b> |
| RBM14         | RNA-binding protein 14 (RNA-binding motif protein 14) (RRM-containing coactivator activator/modulator) (Synaptotagmin-interacting protein) (SYT-interacting protein)              | 14.6018        | -19.28        | 0.031126        | 1000       | 12        | 2        | 13 [ + ]        |
| RBM22         | Pre-mRNA-splicing factor RBM22 (RNA-binding motif protein 22) (Zinc finger CCCH domain-containing protein 16)                                                                     | 15.1659        | -22.23        | 0.031184        | 2637       | 2         | 1        | 2 [ + ]         |
| RBM22         | Pre-mRNA-splicing factor RBM22 (RNA-binding motif protein 22) (Zinc finger CCCH domain-containing protein 16)                                                                     | 15.1641        | -16.54        | 0.031243        | 435        | 17        | 1        | 32 [ + ]        |
| RCCD1         | RCC1 domain containing 1                                                                                                                                                          | 15.1467        | -12.97        | 0.03131         | 316        | 15        | 1        | 34 [ + ]        |
| RCOR3         | REST corepressor 3                                                                                                                                                                | 15.1606        | -18.61        | 0.031355        | 1485       | 5         | 1        | 5 [ + ]         |
| REV3L         | DNA polymerase zeta catalytic subunit (EC 2.7.7.7) (hREV3)                                                                                                                        | 14.4122        | -20.01        | 0.031701        | 3076       | 5         | 2        | 5 [ + ]         |
| RFWD2         | E3 ubiquitin-protein ligase RFWD2 (EC 6.3.2.-) (RING finger and WD repeat domain protein 2) (Constitutive photomorphogenesis protein 1 homolog) (hCOP1) (RING finger protein 200) | 15.1317        | -15.92        | 0.031795        | 1128       | 8         | 3        | 10 [ + ]        |
| RFWD2         | E3 ubiquitin-protein ligase RFWD2 (EC 6.3.2.-) (RING finger and WD repeat domain protein 2) (Constitutive photomorphogenesis protein 1 homolog) (hCOP1) (RING finger protein 200) | 15.129         | -17.26        | 0.031882        | 754        | 14        | 1        | 14 [ + ]        |

|         |                                                                                                                                                                                   |         |        |          |      |    |   |        |
|---------|-----------------------------------------------------------------------------------------------------------------------------------------------------------------------------------|---------|--------|----------|------|----|---|--------|
| RFWD2   | E3 ubiquitin-protein ligase RFWD2 (EC 6.3.2.-) (RING finger and WD repeat domain protein 2) (Constitutive photomorphogenesis protein 1 homolog) (hCOP1) (RING finger protein 200) | 15.1416 | -21.8  | 0.031981 | 799  | 20 | 7 | 35 [+] |
| RG9MTD1 | RNA (guanine-9-) methyltransferase domain containing 1                                                                                                                            | 15.1225 | -11.28 | 0.032094 | 138  | 8  | 1 | 26 [+] |
| RGR     | RPE-retinal G protein-coupled receptor                                                                                                                                            | 15.1225 | -13.98 | 0.032094 | 275  | 15 | 5 | 74 [+] |
| RGS3    | Regulator of G-protein signaling 3 (RGS3) (RGP3)                                                                                                                                  | 15.1225 | -6.73  | 0.032094 | 164  | 8  | 2 | 25 [+] |
| RGS3    | Regulator of G-protein signaling 3 (RGS3) (RGP3)                                                                                                                                  | 15.1225 | -19.67 | 0.032094 | 201  | 9  | 1 | 35 [+] |
| RHBDF1  | rhomboid family 1                                                                                                                                                                 | 15.1199 | -15.85 | 0.032179 | 321  | 14 | 1 | 33 [+] |
| RIT2    | GTP-binding protein Rit2 (Ras-like protein expressed in neurons) (Ras- like without CAAX protein 2)                                                                               | 15.1174 | -15.54 | 0.032261 | 771  | 20 | 5 | 31 [+] |
| RIT2    | GTP-binding protein Rit2 (Ras-like protein expressed in neurons) (Ras- like without CAAX protein 2)                                                                               | 15.1318 | -13.03 | 0.032308 | 872  | 16 | 6 | 23 [+] |
| RNF125  | E3 ubiquitin-protein ligase RNF125 (EC 6.3.2.-) (RING finger protein 125) (T-cell RING activation protein 1) (TRAC-1)                                                             | 15.1129 | -19.64 | 0.032412 | 1382 | 10 | 1 | 7 [+]  |
| RNF186  | RING finger protein 186                                                                                                                                                           | 15.1278 | -16.53 | 0.032444 | 991  | 18 | 5 | 29 [+] |
| RNMTL1  | RNA methyltransferase like 1                                                                                                                                                      | 14.7814 | -17.1  | 0.032497 | 140  | 5  | 4 | 16 [+] |
| RNMTL1  | RNA methyltransferase like 1                                                                                                                                                      | 14.2065 | -11.75 | 0.03261  | 1239 | 12 | 3 | 13 [+] |
| RPA1    | Replication protein A 70 kDa DNA-binding subunit (RP-A) (RF-A) (Replication factor-A protein 1) (Single-stranded DNA-binding protein) (p70)                                       | 15.1225 | -17.53 | 0.03262  | 278  | 13 | 1 | 43 [+] |
| RPL3    | 60S ribosomal protein L3 (HIV-1 TAR RNA-binding protein B) (TARBP-B)                                                                                                              | 15.1225 | -13.88 | 0.03262  | 282  | 15 | 7 | 63 [+] |
| RPS12   | 40S ribosomal protein S12                                                                                                                                                         | 15.1225 | -14.92 | 0.03262  | 255  | 15 | 1 | 39 [+] |
| RPS14   | 40S ribosomal protein S14                                                                                                                                                         | 15.105  | -15.4  | 0.032673 | 422  | 19 | 1 | 38 [+] |

|         |                                                                                                                                                                                                             |         |        |          |      |    |   |        |
|---------|-------------------------------------------------------------------------------------------------------------------------------------------------------------------------------------------------------------|---------|--------|----------|------|----|---|--------|
| RPSAP15 | 40S ribosomal protein SA (p40) (34/67 kDa laminin receptor) (Colon carcinoma laminin-binding protein) (NEM/1CHD4) (Multidrug resistance- associated protein MGr1-Ag)                                        | 15.1203 | -16.23 | 0.032695 | 1477 | 10 | 1 | 8 [+]  |
| RRAD    | GTP-binding protein RAD (RAS associated with diabetes) (RAD1)                                                                                                                                               | 15.1183 | -16.23 | 0.032762 | 1479 | 14 | 4 | 12 [+] |
| RTCD1   | RNA 3'-terminal phosphate cyclase (EC 6.5.1.4) (RNA-3'-phosphate cyclase) (RNA cyclase)                                                                                                                     | 15.1018 | -20.89 | 0.032779 | 1000 | 11 | 1 | 12 [+] |
| RUFY2   | RUN and FYVE domain-containing protein 2 (Rab4-interacting protein related)                                                                                                                                 | 15.1018 | -25.08 | 0.032779 | 1000 | 13 | 1 | 14 [+] |
| S100A12 | Protein S100-A12 (S100 calcium-binding protein A12) (Calgranulin-C) (CAGC) (CGRP) (Neutrophil S100 protein) (Calcium-binding protein in amniotic fluid 1) (CAAF1) (p6) [Contains: Calcitermin]              | 15.1018 | -23.25 | 0.032779 | 1000 | 9  | 1 | 13 [+] |
| SAP30L  | Sin3A associated protein p30-like                                                                                                                                                                           | 15.1018 | -20.89 | 0.032779 | 1000 | 11 | 1 | 12 [+] |
| SATB2   | DNA-binding protein SATB2 (Special AT-rich sequence-binding protein 2)                                                                                                                                      | 14.8919 | -14.51 | 0.032873 | 832  | 17 | 5 | 24 [+] |
| SCFD2   | Sec1 family domain-containing protein 2 (Syntaxin-binding protein 1- like 1)                                                                                                                                | 15.114  | -17.36 | 0.032911 | 1000 | 8  | 1 | 11 [+] |
| SCGB2A2 | Mammaglobin-A precursor (Mammaglobin-1) (Secretoglobin family 2A member 2)                                                                                                                                  | 15.0968 | -18.36 | 0.032946 | 1000 | 14 | 2 | 15 [+] |
| SCGB3A2 | Secretoglobin family 3A member 2 precursor (Uteroglobin-related protein 1) (Pneumo secretory protein 1) (PnSP-1)                                                                                            | 15.0952 | -14.29 | 0.033001 | 1000 | 15 | 1 | 17 [+] |
| SCML4   | sex comb on midleg-like 4                                                                                                                                                                                   | 15.094  | -14.92 | 0.033041 | 832  | 17 | 1 | 18 [+] |
| SCN2A   | Sodium channel protein type 2 subunit alpha (Sodium channel protein type II subunit alpha) (Voltage-gated sodium channel subunit alpha Nav1.2) (Sodium channel protein, brain II subunit alpha) (PDB: 1J8K) | 15.0904 | -14.51 | 0.033164 | 1000 | 19 | 1 | 23 [+] |

|          |                                                                                                                                                                                                          |  |         |        |          |      |    |   |        |
|----------|----------------------------------------------------------------------------------------------------------------------------------------------------------------------------------------------------------|--|---------|--------|----------|------|----|---|--------|
| SCN8A    | Sodium channel protein type 8 subunit alpha (Sodium channel protein type VIII subunit alpha) (Voltage-gated sodium channel subunit alpha Nav1.6)                                                         |  | 15.0888 | -14.51 | 0.033218 | 1000 | 15 | 1 | 18 [+] |
| SDCCAG8  | Serologically defined colon cancer antigen 8 (Centrosomal colon cancer autoantigen protein) (hCCCAP) (Antigen NY-CO-8)                                                                                   |  | 15.0829 | -14.92 | 0.033419 | 838  | 17 | 1 | 18 [+] |
| SDF2L1   | Stromal cell-derived factor 2-like protein 1 precursor (SDF2-like protein 1) (PWP1-interacting protein 8)                                                                                                |  | 14.2043 | -13.57 | 0.03386  | 808  | 23 | 6 | 34 [+] |
| SEC11A   | Signal peptidase complex catalytic subunit SEC11A (EC 3.4.-.-) (SEC11 homolog A) (SEC11-like protein 1) (Microsomal signal peptidase 18 kDa subunit) (SPase 18 kDa subunit) (SPC18) (Endopeptidase SP18) |  | 15.0824 | -21.59 | 0.034008 | 832  | 8  | 1 | 10 [+] |
| SEC61A2  | Protein transport protein Sec61 subunit alpha isoform 2 (Sec61 alpha- 2)                                                                                                                                 |  | 15.0556 | -13.18 | 0.034361 | 1383 | 3  | 1 | 3 [+]  |
| SEMA3B   | Semaphorin-3B precursor (Semaphorin V) (Sema V) (Sema A(V))                                                                                                                                              |  | 15.0554 | -11.39 | 0.034366 | 1000 | 9  | 1 | 11 [+] |
| SEMG1    | Semenogelin-1 precursor (Semenogelin I) (SGI) [Contains: Alpha-inhibin-92; Alpha-inhibin-31; Seminal basic protein]                                                                                      |  | 14.554  | -9.84  | 0.034459 | 134  | 8  | 7 | 31 [+] |
| SEMG2    | Semenogelin-2 precursor (Semenogelin II) (SGII)                                                                                                                                                          |  | 15.0525 | -14.1  | 0.034469 | 334  | 15 | 1 | 33 [+] |
| SEPHS2   | selenophosphate synthetase 2 (SEPHS2), mRNA                                                                                                                                                              |  | 15.0512 | -14.52 | 0.034513 | 436  | 20 | 1 | 35 [+] |
| SERPINB6 | Serpin B6 (Placental thrombin inhibitor) (Cytoplasmic antiproteinase) (CAP) (Protease inhibitor 6) (PI-6)                                                                                                |  | 15.0474 | -14.1  | 0.034647 | 335  | 19 | 6 | 55 [+] |
| SETBP1   | SET-binding protein (SEB)                                                                                                                                                                                |  | 15.0461 | -14.51 | 0.034694 | 1000 | 9  | 1 | 12 [+] |
| SEZ6L2   | seizure related 6 homolog (mouse)-like 2 isoform 1                                                                                                                                                       |  | 15.0622 | -13.6  | 0.034727 | 1000 | 15 | 1 | 17 [+] |

|          |                                                                                                                                           |         |        |          |      |    |   |        |
|----------|-------------------------------------------------------------------------------------------------------------------------------------------|---------|--------|----------|------|----|---|--------|
| SFRS8    | Splicing factor, arginine/serine-rich 8 (Suppressor of white apricot protein homolog)                                                     | 15.0605 | -16.36 | 0.034788 | 1000 | 15 | 1 | 16 [+] |
| SH2B1    | SH2 domain-containing putative adapter SH2-B                                                                                              | 15.0421 | -16.03 | 0.034836 | 572  | 23 | 1 | 35 [+] |
| SHQ1     | SHQ1 homolog                                                                                                                              | 15.0354 | -18.46 | 0.035073 | 810  | 14 | 1 | 19 [+] |
| SHQ1     | SHQ1 homolog                                                                                                                              | 15.0337 | -9.89  | 0.035134 | 324  | 14 | 1 | 38 [+] |
| SIRPB1   | Signal-regulatory protein beta-1 precursor (SIRP-beta-1) (CD172b antigen)                                                                 | 15.0476 | -11.85 | 0.035254 | 1000 | 11 | 1 | 14 [+] |
| SIRT3    | NAD-dependent deacetylase sirtuin-3, mitochondrial precursor (EC 3.5.1.-) (SIR2-like protein 3) (hSIRT3)                                  | 14.6677 | -15.68 | 0.035293 | 173  | 10 | 4 | 46 [+] |
| SKP2     | S-phase kinase-associated protein 2 (F-box protein Skp2) (Cyclin A/CDK2-associated protein p45) (p45skp2) (F-box/LRR-repeat protein 1)    | 15.0448 | -20.36 | 0.035358 | 1110 | 14 | 1 | 11 [+] |
| SLC12A1  | Solute carrier family 12 member 1 (Bumetanide-sensitive sodium- (potassium)-chloride cotransporter 2) (Kidney-specific Na-K-Cl symporter) | 15.0445 | -22.18 | 0.035367 | 1000 | 7  | 1 | 7 [+]  |
| SLC14A2  | Urea transporter, kidney                                                                                                                  | 15.0267 | -17.82 | 0.035386 | 879  | 13 | 1 | 21 [+] |
| SLC1A7   | Excitatory amino acid transporter 5 (Solute carrier family 1 member 7) (Retinal glutamate transporter)                                    | 15.0177 | -8.82  | 0.035712 | 319  | 16 | 1 | 44 [+] |
| SLC20A2  | Solute carrier family 20, member 2                                                                                                        | 15.0151 | -13.37 | 0.035805 | 365  | 15 | 1 | 37 [+] |
| SLC22A2  | Solute carrier family 22 member 2                                                                                                         | 15.0088 | -21.55 | 0.036035 | 300  | 15 | 3 | 50 [+] |
| SLC23A3  | Non-homologous end-joining factor 1 (Protein cernunnos) (XRCC4-like factor)                                                               | 15.0088 | -15.86 | 0.036035 | 265  | 17 | 1 | 44 [+] |
| SLC25A19 | Mitochondrial deoxynucleotide carrier (Solute carrier family 25 member 19) (Mitochondrial uncoupling protein 1)                           | 15.0088 | -13.19 | 0.036035 | 82   | 5  | 1 | 11 [+] |
| SLC25A35 | Solute carrier family 25, member 35                                                                                                       | 15.0088 | -12.46 | 0.036035 | 218  | 12 | 1 | 32 [+] |

|         |                                                                                                                                                                                                                    |         |        |          |      |    |   |        |
|---------|--------------------------------------------------------------------------------------------------------------------------------------------------------------------------------------------------------------------|---------|--------|----------|------|----|---|--------|
| SLC2A11 | Solute carrier family 2, facilitated glucose transporter member 11 (Glucose transporter type 11) (Glucose transporter type 10)                                                                                     | 15.0088 | -9.18  | 0.036035 | 161  | 8  | 1 | 25 [+] |
| SLC30A6 | Solute carrier family 30 (zinc transporter), member 6                                                                                                                                                              | 15.0064 | -16.03 | 0.036125 | 585  | 23 | 1 | 33 [+] |
| SLC33A1 | Acetyl-coenzyme A transporter 1 (AT-1) (Acetyl-CoA transporter) (Solute carrier family 33 member 1)                                                                                                                | 15.023  | -15.9  | 0.036166 | 1000 | 12 | 1 | 11 [+] |
| SLC35B3 | Solute carrier family 35 member B3                                                                                                                                                                                 | 15.0039 | -14.92 | 0.036217 | 882  | 18 | 1 | 19 [+] |
| SLC35B3 | Solute carrier family 35 member B3                                                                                                                                                                                 | 15.0018 | -18.13 | 0.036293 | 1000 | 16 | 3 | 19 [+] |
| SLC38A6 | N system amino acid transporter NAT-1                                                                                                                                                                              | 15.0018 | -13.26 | 0.036293 | 1000 | 13 | 1 | 13 [+] |
| SLC4A11 | Sodium bicarbonate transporter-like protein 11 (Sodium borate cotransporter 1) (NaBC1) (Bicarbonate transporter-related protein 1) (Solute carrier family 4 member 11)                                             | 15.0018 | -20.12 | 0.036293 | 1000 | 4  | 1 | 4 [+]  |
| SLC4A2  | Anion exchange protein 2 (non-erythrocyte band 3-like protein) (AE2 anion exchanger) (Solute carrier family 4 member 2) (SMD2L)                                                                                    | 15.0018 | -19.29 | 0.036293 | 1000 | 7  | 1 | 7 [+]  |
| SLC6A3  | Sodium-dependent dopamine transporter (DA transporter) (DAT)                                                                                                                                                       | 14.9198 | -15.18 | 0.036379 | 1000 | 13 | 2 | 14 [+] |
| SMARCA2 | Probable global transcription activator SNF2L2 (EC 3.6.1.-) (ATP- dependent helicase SMARCA2) (SNF2-alpha) (SWI/SNF-related matrix- associated actin-dependent regulator of chromatin subfamily A member 2) (hBRM) | 15.0139 | -16.65 | 0.036509 | 1000 | 22 | 6 | 38 [+] |
| SMARCA2 | Probable global transcription activator SNF2L2 (EC 3.6.1.-) (ATP- dependent helicase SMARCA2) (SNF2-alpha) (SWI/SNF-related matrix- associated actin-dependent regulator of chromatin subfamily A member 2) (hBRM) | 15.0139 | -23.23 | 0.036509 | 1000 | 12 | 1 | 13 [+] |

|            |                                                                                                                                                                                                                    |  |         |        |          |      |    |   |        |
|------------|--------------------------------------------------------------------------------------------------------------------------------------------------------------------------------------------------------------------|--|---------|--------|----------|------|----|---|--------|
| SMARCA2    | Probable global transcription activator SNF2L2 (EC 3.6.1.-) (ATP- dependent helicase SMARCA2) (SNF2-alpha) (SWI/SNF-related matrix- associated actin-dependent regulator of chromatin subfamily A member 2) (hBRM) |  | 14.9927 | -15.89 | 0.036632 | 1242 | 7  | 1 | 7 [+]  |
| SMARCA2    | Probable global transcription activator SNF2L2 (EC 3.6.1.-) (ATP- dependent helicase SMARCA2) (SNF2-alpha) (SWI/SNF-related matrix- associated actin-dependent regulator of chromatin subfamily A member 2) (hBRM) |  | 15.0088 | -13.01 | 0.0367   | 183  | 10 | 3 | 42 [+] |
| SMARCA2    | Probable global transcription activator SNF2L2 (EC 3.6.1.-) (ATP- dependent helicase SMARCA2) (SNF2-alpha) (SWI/SNF-related matrix- associated actin-dependent regulator of chromatin subfamily A member 2) (hBRM) |  | 15.0088 | -13.23 | 0.0367   | 289  | 12 | 1 | 25 [+] |
| SMARCA2    | Probable global transcription activator SNF2L2 (EC 3.6.1.-) (ATP- dependent helicase SMARCA2) (SNF2-alpha) (SWI/SNF-related matrix- associated actin-dependent regulator of chromatin subfamily A member 2) (hBRM) |  | 15.0088 | -16.11 | 0.0367   | 196  | 11 | 8 | 38 [+] |
| SMCHD1     | Structural maintenance of chromosomes flexible hinge domain-containing protein 1                                                                                                                                   |  | 14.9875 | -16.15 | 0.036823 | 611  | 14 | 1 | 21 [+] |
| SMG1_HUMAN | Serine/threonine-protein kinase SMG1 (EC 2.7.11.1) (SMG-1) (hSMG-1) (Lambda/iota protein kinase C-interacting protein) (Lambda-interacting protein) (61E3.4)                                                       |  | 14.4017 | -12.97 | 0.036921 | 1000 | 18 | 3 | 24 [+] |



|            |                                                                                                                                                                                                                                                           |         |        |          |      |    |   |        |
|------------|-----------------------------------------------------------------------------------------------------------------------------------------------------------------------------------------------------------------------------------------------------------|---------|--------|----------|------|----|---|--------|
| SMG1_HUMAN | Serine/threonine-protein kinase SMG1 (EC 2.7.11.1) (SMG-1) (hSMG-1) (Lambda/iota protein kinase C-interacting protein) (Lambda-interacting protein) (61E3.4)                                                                                              | 14.2317 | -17.68 | 0.036958 | 2703 | 6  | 5 | 7 [+]  |
| SMPD4      | Sphingomyelin phosphodiesterase 4 (EC 3.1.4.12) (Neutral sphingomyelinase 3) (Neutral sphingomyelinase III) (nSMase3) (nSMase- 3)                                                                                                                         | 15.0018 | -21.55 | 0.036968 | 1000 | 12 | 1 | 13 [+] |
| SMPX       | Small muscular protein (Stretch-responsive skeletal muscle protein)                                                                                                                                                                                       | 15.0018 | -18.59 | 0.036968 | 1000 | 15 | 1 | 17 [+] |
| SMS        | Spermine synthase (EC 2.5.1.22) (Spermidine aminopropyltransferase) (SPMSY)                                                                                                                                                                               | 15.0018 | -19.86 | 0.036968 | 1000 | 17 | 1 | 19 [+] |
| SMS        | Spermine synthase (EC 2.5.1.22) (Spermidine aminopropyltransferase) (SPMSY)                                                                                                                                                                               | 15.0018 | -12.56 | 0.036968 | 1000 | 16 | 1 | 20 [+] |
| SNX1       | Sorting nexin-1                                                                                                                                                                                                                                           | 15.0018 | -22.18 | 0.036968 | 1000 | 7  | 1 | 8 [+]  |
| SNX17      | Sorting nexin-17                                                                                                                                                                                                                                          | 15.0018 | -24.18 | 0.036968 | 1000 | 17 | 1 | 17 [+] |
| SNX3       | Sorting nexin-3 (Protein SDP3)                                                                                                                                                                                                                            | 15.0018 | -15.43 | 0.036968 | 1000 | 11 | 1 | 12 [+] |
| SORL1      | Sortilin-related receptor precursor (Sorting protein-related receptor containing LDLR class A repeats) (SorLA) (SorLA-1) (Low-density lipoprotein receptor relative with 11 ligand-binding repeats) (LDLR relative with 11 ligand-binding repeats) (LR11) | 14.9835 | -13.58 | 0.036975 | 384  | 17 | 1 | 56 [+] |
| SP140      | Nuclear body protein SP140 (Nuclear autoantigen Sp-140) (Speckled 140 kDa) (LYSp100 protein) (Lymphoid-restricted homolog of Sp100)                                                                                                                       | 14.9815 | -13.49 | 0.03705  | 520  | 17 | 1 | 21 [+] |
| SP7        | Transcription factor Sp7 (Zinc finger protein osterix)                                                                                                                                                                                                    | 14.9985 | -17.94 | 0.037096 | 550  | 18 | 1 | 33 [+] |

|            |                                                                                                                                                                |  |         |        |          |      |    |   |        |
|------------|----------------------------------------------------------------------------------------------------------------------------------------------------------------|--|---------|--------|----------|------|----|---|--------|
| SPACA5     | Sperm acrosome-associated protein 5 precursor (EC 3.2.1.17) (Lysozyme-like protein 5) (Sperm-specific lysozyme-like protein X) (SLLP-X)                        |  | 14.9952 | -23.33 | 0.037221 | 879  | 7  | 1 | 7 [+]  |
| SPANXN5    | SPANX family, member N5                                                                                                                                        |  | 14.9748 | -15.05 | 0.037302 | 638  | 14 | 1 | 21 [+] |
| SPATC1     | spermatogenesis and centriole associated 1                                                                                                                     |  | 14.9738 | -11.25 | 0.03734  | 350  | 16 | 1 | 45 [+] |
| SPG7       | Paraplegin (EC 3.4.24.-) (Spastic paraplegia protein 7)                                                                                                        |  | 14.9709 | -12.06 | 0.037452 | 458  | 21 | 1 | 40 [+] |
| SPIRE1     | Spire homolog 1                                                                                                                                                |  | 14.9693 | -18.29 | 0.037511 | 1357 | 9  | 1 | 10 [+] |
| SPP1       | Osteopontin precursor (Bone sialoprotein-1) (Secreted phosphoprotein 1) (SPP-1) (Urinary stone protein) (Nephropontin) (Uropontin)                             |  | 14.9669 | -12.91 | 0.037601 | 614  | 16 | 1 | 25 [+] |
| SPTBN4     | Spectrin beta chain, brain 3 (Spectrin, non-erythroid beta chain 3) (Beta-IV spectrin)                                                                         |  | 14.9669 | -12.91 | 0.037601 | 614  | 15 | 1 | 25 [+] |
| SQRDL      | Sulfide:quinone oxidoreductase, mitochondrial precursor (EC 1.-.-.-)                                                                                           |  | 14.9655 | -18.17 | 0.037655 | 329  | 16 | 4 | 35 [+] |
| SRD5A1     | 3-oxo-5-alpha-steroid 4-dehydrogenase 1 (EC 1.3.99.5) (Steroid 5- alpha-reductase 1) (SR type 1) (S5AR)                                                        |  | 14.9645 | -17.35 | 0.037695 | 897  | 15 | 1 | 19 [+] |
| SRGAP1     | SLIT-ROBO Rho GTPase-activating protein 1 (srGAP1) (Rho GTPase-activating protein 13)                                                                          |  | 14.9643 | -11.24 | 0.037703 | 352  | 17 | 1 | 44 [+] |
| SSX2_HUMAN | Protein SSX2 (Synovial sarcoma, X breakpoint 2) (SSX) (HOM-MEL-40)                                                                                             |  | 14.9604 | -13.41 | 0.037851 | 330  | 17 | 5 | 47 [+] |
| SSX2_HUMAN | Protein SSX2 (Synovial sarcoma, X breakpoint 2) (SSX) (HOM-MEL-40)                                                                                             |  | 14.9569 | -13.58 | 0.037986 | 390  | 17 | 2 | 56 [+] |
| SSX3       | Protein SSX3                                                                                                                                                   |  | 14.9562 | -17.14 | 0.038011 | 789  | 13 | 2 | 13 [+] |
| SSX7       | Protein SSX7                                                                                                                                                   |  | 14.8603 | -17.69 | 0.038107 | 672  | 16 | 4 | 30 [+] |
| ST6GALNAC2 | Alpha-N-acetylgalactosaminide alpha-2,6-sialyltransferase 2 (EC 2.4.99.-) (GalNAc alpha-2,6-sialyltransferase II) (ST6GalNAc II) (Sialyltransferase 7B) (SThM) |  | 14.9534 | -16.66 | 0.038121 | 430  | 17 | 1 | 35 [+] |

|         |                                                                                                                              |  |         |        |          |      |    |   |        |
|---------|------------------------------------------------------------------------------------------------------------------------------|--|---------|--------|----------|------|----|---|--------|
| STATH   | Statherin precursor                                                                                                          |  | 14.97   | -21.59 | 0.038207 | 891  | 8  | 1 | 10 [+] |
| STK24   | Serine/threonine-protein kinase 24 (EC 2.7.11.1) (STE20-like kinase MST3) (MST-3) (Mammalian STE20-like protein kinase 2)    |  | 14.948  | -14.82 | 0.03833  | 531  | 24 | 1 | 32 [+] |
| STK32C  | Serine/threonine-protein kinase 32C (EC 2.7.11.1) (PKE) (YANK3)                                                              |  | 14.9662 | -15.85 | 0.038357 | 1000 | 7  | 1 | 7 [+]  |
| STRN3   | Striatin-3 (Cell-cycle autoantigen SG2NA) (S/G2 antigen)                                                                     |  | 14.9463 | -13.39 | 0.038398 | 465  | 20 | 1 | 35 [+] |
| SUPT4H1 | RING finger protein 43 precursor                                                                                             |  | 14.9452 | -10.99 | 0.038439 | 333  | 17 | 1 | 45 [+] |
| SURF4   | Surfeit locus protein 4                                                                                                      |  | 14.9422 | -13.92 | 0.038557 | 436  | 17 | 1 | 45 [+] |
| SUSD4   | Susim domain-containing protein 4                                                                                            |  | 14.9411 | -17.35 | 0.0386   | 911  | 14 | 1 | 18 [+] |
| SUZ12P  | SUZ12P protein                                                                                                               |  | 14.9384 | -15.19 | 0.038704 | 437  | 23 | 3 | 61 [+] |
| SVEP1   | polydom                                                                                                                      |  | 14.9372 | -16.66 | 0.03875  | 434  | 20 | 5 | 51 [+] |
| SYN2    | Synapsin-2 (Synapsin II)                                                                                                     |  | 14.936  | -15.47 | 0.038798 | 535  | 17 | 1 | 34 [+] |
| TAS1R1  | Taste receptor type 1 member 1 precursor (G-protein coupled receptor 70)                                                     |  | 14.9551 | -25.51 | 0.038799 | 1000 | 12 | 4 | 22 [+] |
| TAS2R1  | Taste receptor type 2 member 1 (T2R1) (Taste receptor family B member 7) (T2R7)                                              |  | 14.9548 | -14.94 | 0.03881  | 354  | 15 | 1 | 38 [+] |
| TAS2R16 | Taste receptor type 2 member 16 (T2R16)                                                                                      |  | 14.9339 | -17.98 | 0.038882 | 1213 | 14 | 5 | 14 [+] |
| TAS2R42 | Taste receptor type 2 member 42 (T2R42) (T2R55)                                                                              |  | 14.9473 | -13.03 | 0.039114 | 568  | 14 | 4 | 25 [+] |
| TBC1D21 | TBC1 domain family member 21                                                                                                 |  | 14.9259 | -14.78 | 0.039199 | 1000 | 10 | 1 | 11 [+] |
| TBCD    | Tubulin-specific chaperone D (Tubulin-folding cofactor D) (Beta- tubulin cofactor D) (tfcD) (SSD-1)                          |  | 14.9438 | -19.57 | 0.039254 | 381  | 16 | 1 | 35 [+] |
| TBCD    | Tubulin-specific chaperone D (Tubulin-folding cofactor D) (Beta- tubulin cofactor D) (tfcD) (SSD-1)                          |  | 14.9228 | -19.05 | 0.03932  | 1000 | 13 | 1 | 14 [+] |
| TBR1    | T-brain-1 protein (T-box brain protein 1) (TBR-1) (TES-56)                                                                   |  | 14.9224 | -19.53 | 0.039338 | 577  | 21 | 5 | 46 [+] |
| TCEAL4  | Transcription elongation factor A protein-like 4 (TCEA-like protein 4) (Transcription elongation factor S-II protein-like 4) |  | 14.9199 | -14.51 | 0.039438 | 817  | 8  | 1 | 9 [+]  |

|             |                                                                                                                                                                                             |  |         |        |          |      |    |   |        |
|-------------|---------------------------------------------------------------------------------------------------------------------------------------------------------------------------------------------|--|---------|--------|----------|------|----|---|--------|
| TCERG1L     | transcription elongation regulator 1-like                                                                                                                                                   |  | 14.1755 | -13.24 | 0.039621 | 1173 | 18 | 2 | 14 [+] |
| TCHP        | trichoplein                                                                                                                                                                                 |  | 14.9138 | -15.14 | 0.039683 | 1000 | 24 | 3 | 32 [+] |
| TCN2        | Transcobalamin-2 precursor<br>(Transcobalamin II) (TCII) (TC II)                                                                                                                            |  | 14.9084 | -12.36 | 0.039897 | 364  | 17 | 1 | 30 [+] |
| TDRD1       | Tudor domain-containing protein 1                                                                                                                                                           |  | 14.9018 | -12.54 | 0.040167 | 1000 | 12 | 1 | 14 [+] |
| TDRD5       | Tudor domain-containing protein 5                                                                                                                                                           |  | 14.9018 | -26.43 | 0.040167 | 1000 | 15 | 1 | 17 [+] |
| TDRD6       | Tudor domain-containing protein 6<br>(Antigen NY-CO-45)                                                                                                                                     |  | 14.9018 | -17.92 | 0.040167 | 1000 | 12 | 1 | 14 [+] |
| TEX15       | Testis-expressed sequence 15 protein                                                                                                                                                        |  | 14.9018 | -24.47 | 0.040167 | 1000 | 11 | 1 | 16 [+] |
| TEX28_HUMAN | Testis-specific protein TEX28                                                                                                                                                               |  | 14.9168 | -16.65 | 0.040366 | 1000 | 17 | 2 | 22 [+] |
| TEX28P1     | Testis-specific protein TEX28                                                                                                                                                               |  | 14.8951 | -20.85 | 0.040439 | 203  | 8  | 1 | 22 [+] |
| TEX28P2     | Testis-specific protein TEX28                                                                                                                                                               |  | 14.8951 | -14.94 | 0.040439 | 229  | 13 | 1 | 47 [+] |
| TFAP2E      | transcription factor AP-2 epsilon<br>(activating enhancer binding protein 2<br>isoform 1)                                                                                                   |  | 14.8951 | -10.24 | 0.040439 | 152  | 8  | 1 | 24 [+] |
| TFAP2E      | transcription factor AP-2 epsilon<br>(activating enhancer binding protein 2<br>isoform 2)                                                                                                   |  | 14.8951 | -11.26 | 0.040439 | 165  | 10 | 5 | 48 [+] |
| TGIF1       | Homeobox protein TGIF1 (5'-TG-3'-<br>interacting factor 1)                                                                                                                                  |  | 14.8951 | -18.19 | 0.040439 | 72   | 4  | 1 | 13 [+] |
| TGM2        | Protein-glutamine gamma-<br>glutamyltransferase 2 (EC 2.3.2.13) (Tissue<br>transglutaminase) (TGase C) (TGC)<br>(TG(C)) (Transglutaminase-2) (TGase- H)                                     |  | 14.8951 | -10.24 | 0.040439 | 296  | 17 | 1 | 57 [+] |
| THRAP6      | Thyroid hormone receptor-associated<br>protein 6 (Thyroid hormone receptor-<br>associated protein complex 25 kDa<br>component) (Trap25) (TRAP/Mediator<br>complex component TRAP25) (MED30) |  | 14.8951 | -10.24 | 0.040439 | 152  | 8  | 1 | 24 [+] |
| THSD7A      | Thrombospondin type-1 domain-containing<br>protein 7A precursor                                                                                                                             |  | 14.8951 | -14.62 | 0.040439 | 206  | 12 | 1 | 39 [+] |
| TIAM2       | Putative RNA-binding protein 16 (RNA-<br>binding motif protein 16)                                                                                                                          |  | 14.8951 | -10.24 | 0.040439 | 152  | 7  | 1 | 23 [+] |

|         |                                                                                                                                   |  |         |        |          |      |    |   |        |
|---------|-----------------------------------------------------------------------------------------------------------------------------------|--|---------|--------|----------|------|----|---|--------|
| TIMM22  | Mitochondrial import inner membrane translocase subunit Tim22 (Testis-expressed sequence 4)                                       |  | 14.9138 | -14.14 | 0.040491 | 1000 | 4  | 2 | 4 [+]  |
| TIMM8A  | Mitochondrial import inner membrane translocase subunit Tim8 A (Deafness dystonia protein 1) (X-linked deafness dystonia protein) |  | 14.9138 | -20.72 | 0.040492 | 388  | 19 | 7 | 58 [+] |
| TLE1    | Transducin-like enhancer protein 1 (ESG1) (E(Sp1) homolog)                                                                        |  | 14.8937 | -14.11 | 0.040496 | 822  | 17 | 6 | 30 [+] |
| TLE2    | Transducin-like enhancer protein 2 (ESG2)                                                                                         |  | 14.8913 | -19.72 | 0.040594 | 1077 | 16 | 3 | 23 [+] |
| TLN1    | Talin-1                                                                                                                           |  | 14.8863 | -11.14 | 0.040799 | 552  | 19 | 1 | 23 [+] |
| TLR4    | Toll-like receptor 4 precursor (hToll) (CD284 antigen)                                                                            |  | 14.8863 | -25.51 | 0.0408   | 1512 | 13 | 1 | 12 [+] |
| TM2D1   | $\beta$ -Amyloid binding protein precursor                                                                                        |  | 14.8829 | -25.12 | 0.040942 | 2112 | 8  | 2 | 8 [+]  |
| TM7SF3  | Transmembrane 7 superfamily member 3 precursor (Seven span transmembrane protein)                                                 |  | 14.9018 | -14.41 | 0.040996 | 1000 | 14 | 1 | 17 [+] |
| TMC1    | Transmembrane channel-like protein 1 (Transmembrane cochlear-expressed protein 1)                                                 |  | 14.9018 | -14.84 | 0.040996 | 1000 | 9  | 1 | 9 [+]  |
| TMED5   | Transmembrane emp24 domain-containing protein 5 precursor                                                                         |  | 14.9018 | -18.64 | 0.040996 | 1000 | 13 | 1 | 13 [+] |
| TMEM149 | Transmembrane protein 149                                                                                                         |  | 14.9018 | -18.57 | 0.040996 | 1000 | 15 | 2 | 15 [+] |
| TMEM163 | Transmembrane protein 163                                                                                                         |  | 14.4213 | -21.23 | 0.041024 | 1763 | 8  | 4 | 7 [+]  |
| TMEM2   | Transmembrane protein 2                                                                                                           |  | 14.875  | -15.3  | 0.041272 | 1000 | 12 | 2 | 13 [+] |
| TMEM38B | Transmembrane protein 38B                                                                                                         |  | 14.8951 | -14.89 | 0.041279 | 322  | 16 | 3 | 61 [+] |
| TMEM38B | Transmembrane protein 38B                                                                                                         |  | 14.8951 | -14.89 | 0.041279 | 321  | 14 | 1 | 44 [+] |
| TMEM4   | MIR-interacting saposin-like protein precursor (Transmembrane protein 4) (Putative secreted protein ZSIG9)                        |  | 14.8951 | -17.46 | 0.041279 | 193  | 11 | 1 | 29 [+] |
| TMEM41B | Transmembrane protein 41B                                                                                                         |  | 14.8951 | -13.18 | 0.041279 | 225  | 13 | 5 | 44 [+] |
| TMEM52  | Transmembrane protein 52 precursor                                                                                                |  | 14.3017 | -13.83 | 0.041372 | 1000 | 15 | 2 | 15 [+] |

|          |                                                                                                                                                                                                                                                   |         |        |          |      |    |   |        |
|----------|---------------------------------------------------------------------------------------------------------------------------------------------------------------------------------------------------------------------------------------------------|---------|--------|----------|------|----|---|--------|
| TMPO     | Lamina-associated polypeptide 2, isoforms beta/gamma (Thymopoietin, isoforms beta/gamma) (TP beta/gamma) (Thymopoietin-related peptide isoforms beta/gamma) (TPRP isoforms beta/gamma) [Contains: Thymopoietin (TP) (Splenin); Thymopentin (TP5)] | 14.8721 | -14.82 | 0.041392 | 557  | 22 | 1 | 27 [+] |
| TMPO     | Lamina-associated polypeptide 2, isoforms beta/gamma (Thymopoietin, isoforms beta/gamma) (TP beta/gamma) (Thymopoietin-related peptide isoforms beta/gamma) (TPRP isoforms beta/gamma) [Contains: Thymopoietin (TP) (Splenin); Thymopentin (TP5)] | 14.4547 | -14    | 0.041518 | 1000 | 17 | 5 | 21 [+] |
| TMUB1    | Transmembrane and ubiquitin-like domain-containing protein 1 (Ubiquitin-like protein SB144)                                                                                                                                                       | 14.8676 | -13.18 | 0.041581 | 1605 | 2  | 1 | 2 [+]  |
| TNPO1    | Transportin-1 (Importin beta-2) (Karyopherin beta-2) (M9 region interaction protein) (MIP)                                                                                                                                                        | 14.8614 | -19.11 | 0.041842 | 734  | 19 | 4 | 26 [+] |
| TOX3     | Trinucleotide repeat containing 9                                                                                                                                                                                                                 | 14.4017 | -21.76 | 0.041878 | 1000 | 20 | 3 | 24 [+] |
| TOX3     | Trinucleotide repeat containing 9                                                                                                                                                                                                                 | 14.8563 | -20.4  | 0.042059 | 1000 | 12 | 1 | 13 [+] |
| TP73     | Tumor protein p73 (p53-like transcription factor) (p53-related protein)                                                                                                                                                                           | 14.8563 | -22.44 | 0.042059 | 1000 | 8  | 1 | 11 [+] |
| TRAF3IP3 | TRAF3-interacting JNK-activating modulator (TRAF3-interacting protein 3)                                                                                                                                                                          | 14.8557 | -12.91 | 0.042082 | 655  | 15 | 1 | 23 [+] |
| TRAF4    | TNF receptor-associated factor 4 (Cysteine-rich domain associated with RING and Traf domains protein 1) (Malignant 62) (RING finger protein 83)                                                                                                   | 14.8526 | -9.85  | 0.042215 | 352  | 21 | 1 | 41 [+] |
| TRAT1    | T-cell receptor-associated transmembrane adapter 1 (T-cell receptor- interacting molecule) (TRIM) (pp29/30)                                                                                                                                       | 14.873  | -14.98 | 0.042234 | 455  | 20 | 4 | 46 [+] |

|         |                                                                                                                                                                                                                                       |         |        |          |      |    |   |        |
|---------|---------------------------------------------------------------------------------------------------------------------------------------------------------------------------------------------------------------------------------------|---------|--------|----------|------|----|---|--------|
| TRDMT1  | tRNA (cytosine-5-)-methyltransferase (EC 2.1.1.29) (DNA (cytosine-5)-methyltransferase-like protein 2) (Dnmt2) (DNA methyltransferase homolog HsaIIP) (DNA MTase homolog HsaIIP) (M.HsaIIP) (PuMet)                                   | 14.7728 | -15.9  | 0.042322 | 1646 | 5  | 2 | 6 [+]  |
| TRIAP1  | TP53-regulated inhibitor of apoptosis 1 (p53-inducible cell-survival factor) (p53CSV) (Protein 15E1.1) (WF-1)                                                                                                                         | 14.8457 | -10.98 | 0.042508 | 520  | 17 | 1 | 31 [+] |
| TRIM38  | Tripartite motif-containing protein 38 (RING finger protein 15) (Zinc finger protein P-Box)                                                                                                                                           | 14.8457 | -10.98 | 0.042508 | 519  | 18 | 3 | 42 [+] |
| TRIM38  | Tripartite motif-containing protein 38 (RING finger protein 15) (Zinc finger protein P-Box)                                                                                                                                           | 14.5453 | -11.84 | 0.042689 | 593  | 19 | 6 | 36 [+] |
| TRIM4   | Tripartite motif-containing protein 4 (RING finger protein 87)                                                                                                                                                                        | 14.8409 | -12.81 | 0.042717 | 1000 | 12 | 1 | 12 [+] |
| TRIM63  | Ubiquitin ligase TRIM63 (EC 6.3.2.-) (Tripartite motif-containing protein 63) (Muscle-specific RING finger protein 1) (MuRF1) (MURF-1) (RING finger protein 28) (Striated muscle RING zinc finger protein) (Iris RING finger protein) | 14.8409 | -16.81 | 0.042717 | 1000 | 10 | 1 | 16 [+] |
| TRIM72  | Tripartite motif-containing protein 72                                                                                                                                                                                                | 14.8402 | -18.36 | 0.042745 | 1196 | 8  | 1 | 9 [+]  |
| TRPM6   | Transient receptor potential cation channel subfamily M member 6 (EC 2.7.11.1) (Channel kinase 2) (Melastatin-related TRP cation channel 6)                                                                                           | 14.8393 | -10.98 | 0.042785 | 522  | 17 | 1 | 31 [+] |
| TRPT1   | tRNA 2'-phosphotransferase 1 (EC 2.7.1.160)                                                                                                                                                                                           | 14.8368 | -14.46 | 0.042892 | 1000 | 10 | 1 | 9 [+]  |
| TSC22D4 | TSC22 domain family protein 4 (TSC22-related-inducible leucine zipper protein 2) (Tsc-22-like protein THG-1)                                                                                                                          | 14.83   | -14.01 | 0.04319  | 650  | 14 | 1 | 19 [+] |
| TSPAN32 | Tetraspanin-32 (Protein Phemx)                                                                                                                                                                                                        | 14.851  | -22.88 | 0.043205 | 1194 | 9  | 1 | 7 [+]  |
| TSPAN32 | Tetraspanin-32 (Protein Phemx)                                                                                                                                                                                                        | 14.3132 | -15.49 | 0.04324  | 1000 | 15 | 3 | 15 [+] |

|         |                                                                                                                                                                                |  |         |        |          |      |    |   |        |
|---------|--------------------------------------------------------------------------------------------------------------------------------------------------------------------------------|--|---------|--------|----------|------|----|---|--------|
| TTLL11  | Tubulin--tyrosine ligase-like protein 11                                                                                                                                       |  | 14.8287 | -17.82 | 0.043244 | 1000 | 11 | 1 | 14 [+] |
| TTN     | Titin (EC 2.7.11.1) (Connectin) (Rhabdomyosarcoma antigen MU-RMS-40.14)                                                                                                        |  | 14.8287 | -16.25 | 0.043244 | 1000 | 12 | 1 | 13 [+] |
| TUBB2A  | Tubulin beta-2A chain                                                                                                                                                          |  | 14.8272 | -20.93 | 0.04331  | 1000 | 12 | 1 | 11 [+] |
| TUBGCP6 | Gamma-tubulin complex component 6 (GCP-6)                                                                                                                                      |  | 14.8483 | -17.74 | 0.043321 | 847  | 14 | 4 | 16 [+] |
| TUSC5   | Tumor suppressor candidate 5 (TUSC5), mRNA                                                                                                                                     |  | 14.8265 | -15.32 | 0.04334  | 1212 | 6  | 1 | 6 [+]  |
| TXN2    | Thioredoxin, mitochondrial precursor (Mt-Trx) (MTRX) (Thioredoxin-2)                                                                                                           |  | 14.8245 | -14.29 | 0.043427 | 1187 | 8  | 1 | 7 [+]  |
| UBAP2L  | Ubiquitin-associated protein 2-like (Protein NICE-4)                                                                                                                           |  | 14.8188 | -18.69 | 0.043678 | 1565 | 5  | 1 | 5 [+]  |
| UBE2E4P | Ubiquitin-conjugating enzyme E2 E3 (EC 6.3.2.19) (Ubiquitin-protein ligase E3) (Ubiquitin carrier protein E3) (Ubiquitin-conjugating enzyme E2-23 kDa) (UbcH9) (UbcM2)         |  | 14.8182 | -20.38 | 0.043707 | 1000 | 4  | 1 | 5 [+]  |
| UBE2M   | NEDD8-conjugating enzyme Ubc12 (EC 6.3.2.-) (Ubiquitin-conjugating enzyme E2 M) (NEDD8 protein ligase) (NEDD8 carrier protein)                                                 |  | 14.8152 | -12.57 | 0.043839 | 1000 | 12 | 1 | 10 [+] |
| UBE4A   | Ubiquitin conjugation factor E4 A                                                                                                                                              |  | 14.8141 | -17.43 | 0.043888 | 1000 | 10 | 1 | 9 [+]  |
| UGCGL2  | UDP-glucose:glycoprotein glucosyltransferase 2 precursor (EC 2.4.1.-) (UDP-glucose ceramide glucosyltransferase-like 1) (UDP-- Glc:glycoprotein glucosyltransferase 2) (HUGT2) |  | 14.8137 | -14.92 | 0.043905 | 1000 | 17 | 1 | 17 [+] |
| UROS    | Uroporphyrinogen-III synthase (EC 4.2.1.75) (UROS) (Uroporphyrinogen- III cosynthetase) (Hydroxymethylbilane hydrolyase [cyclizing]) (UROIIIS)                                 |  | 14.8121 | -20.56 | 0.043975 | 1216 | 9  | 1 | 9 [+]  |



|        |                                                                                                                                                                                                                    |         |        |          |      |    |   |          |
|--------|--------------------------------------------------------------------------------------------------------------------------------------------------------------------------------------------------------------------|---------|--------|----------|------|----|---|----------|
| USP6   | Ubiquitin carboxyl-terminal hydrolase 6 (EC 3.1.2.15) (Ubiquitin thioesterase 6) (Ubiquitin-specific-processing protease 6) (Deubiquitinating enzyme 6) (Proto-oncogene TRE-2)                                     | 14.8117 | -14.61 | 0.043991 | 386  | 22 | 3 | 70 [ + ] |
| UXS1   | UDP-glucuronic acid decarboxylase 1 (EC 4.1.1.35) (UDP-glucuronate decarboxylase 1) (UGD) (UXS-1)                                                                                                                  | 14.8325 | -15.68 | 0.044034 | 662  | 18 | 1 | 28 [ + ] |
| VAC14  | Vac14 homolog                                                                                                                                                                                                      | 14.8082 | -17.62 | 0.044148 | 2239 | 2  | 1 | 3 [ + ]  |
| VAMP8  | Vesicle-associated membrane protein 8 (VAMP-8) (Endobrevin) (EDB)                                                                                                                                                  | 14.8274 | -15.68 | 0.044266 | 664  | 18 | 1 | 28 [ + ] |
| VANGL1 | Vang-like protein 1 (Van Gogh-like protein 1) (Strabismus 2) (Loop- tail protein 2 homolog) (LPP2)                                                                                                                 | 14.8037 | -10.09 | 0.044347 | 444  | 19 | 1 | 35 [ + ] |
| VDAC1  | Voltage-dependent anion-selective channel protein 1 (VDAC-1) (hVDAC1) (Outer mitochondrial membrane protein porin 1) (Plasmalemmal porin) (Porin 31HL) (Porin 31HM)                                                | 14.8246 | -14.48 | 0.044396 | 470  | 16 | 1 | 33 [ + ] |
| VDAC4  | Voltage-dependent anion-selective channel protein 4 (VDAC-4) (Fragment)                                                                                                                                            | 14.8025 | -13.03 | 0.044402 | 713  | 15 | 1 | 20 [ + ] |
| VIPR2  | Vasoactive intestinal polypeptide receptor 2 precursor (VIP-R-2) (Pituitary adenylate cyclase-activating polypeptide type III receptor) (PACAP type III receptor) (PACAP-R-3) (Helodermin-preferring VIP receptor) | 14.8018 | -18.45 | 0.044435 | 1000 | 10 | 1 | 12 [ + ] |
| VLDLR  | Very low-density lipoprotein receptor precursor (VLDL receptor) (VLDL- R)                                                                                                                                          | 14.8018 | -19.82 | 0.044435 | 1000 | 11 | 1 | 12 [ + ] |
| VLDLR  | Very low-density lipoprotein receptor precursor (VLDL receptor) (VLDL- R)                                                                                                                                          | 14.8018 | -17.74 | 0.044435 | 1000 | 14 | 1 | 15 [ + ] |
| VPS18  | Vacuolar protein sorting-associated protein 18 homolog (hVPS18)                                                                                                                                                    | 14.8018 | -18.12 | 0.044435 | 1000 | 6  | 1 | 9 [ + ]  |

|         |                                                                                                                                                                                                                                                                |  |         |        |          |      |    |   |        |
|---------|----------------------------------------------------------------------------------------------------------------------------------------------------------------------------------------------------------------------------------------------------------------|--|---------|--------|----------|------|----|---|--------|
| VRK3    | Serine/threonine-protein kinase VRK3 (EC 2.7.11.1) (Vaccinia-related kinase 3)                                                                                                                                                                                 |  | 14.8018 | -15.59 | 0.044435 | 1000 | 12 | 1 | 13 [+] |
| WBP2NL  | WBP2 N-terminal like                                                                                                                                                                                                                                           |  | 14.8018 | -16.03 | 0.044435 | 1000 | 14 | 1 | 20 [+] |
| WBP2NL  | WBP2 N-terminal like                                                                                                                                                                                                                                           |  | 14.8018 | -10.08 | 0.044435 | 1000 | 11 | 1 | 12 [+] |
| WBP5    | WW domain-binding protein 5 (WBP-5)                                                                                                                                                                                                                            |  | 14.8012 | -24.25 | 0.044462 | 667  | 18 | 1 | 19 [+] |
| WBSCR17 | putative polypeptide N-acetylgalactosaminyltransferase-like protein 3 (EC 2.4.1.41) (Protein-UDP acetylgalactosaminyltransferase-like protein 3) (UDP-GalNAc:polypeptide N-acetylgalactosaminyltransferase-like protein 3) (Polypeptide GalNAc transferase-11) |  | 14.8004 | -13.03 | 0.044498 | 714  | 15 | 1 | 20 [+] |
| WDR13   | WD repeat protein 13                                                                                                                                                                                                                                           |  | 14.799  | -17    | 0.044558 | 1255 | 10 | 1 | 14 [+] |
| WDR13   | WD repeat protein 13                                                                                                                                                                                                                                           |  | 14.8188 | -16.81 | 0.044661 | 1493 | 6  | 2 | 6 [+]  |
| WDR26   | WD repeat protein 26 (CUL4- and DDB1-associated WDR protein 2) (Myocardial ischemic preconditioning up-regulated protein 2)                                                                                                                                    |  | 14.0853 | -19.55 | 0.044746 | 1392 | 21 | 5 | 24 [+] |
| WDR44   | WD repeat protein 44 (Rabphilin-11)                                                                                                                                                                                                                            |  | 14.816  | -14.5  | 0.044792 | 385  | 17 | 6 | 55 [+] |
| WDR44   | WD repeat protein 44 (Rabphilin-11)                                                                                                                                                                                                                            |  | 14.811  | -20.51 | 0.045021 | 442  | 21 | 1 | 36 [+] |
| WDR44   | WD repeat protein 44 (Rabphilin-11)                                                                                                                                                                                                                            |  | 14.7884 | -15.04 | 0.045036 | 1306 | 5  | 1 | 5 [+]  |
| WDR47   | WD repeat protein 47                                                                                                                                                                                                                                           |  | 14.8044 | -14.84 | 0.04533  | 1104 | 11 | 1 | 10 [+] |
| WDR47   | WD repeat protein 47                                                                                                                                                                                                                                           |  | 14.7814 | -9.11  | 0.045355 | 299  | 15 | 1 | 42 [+] |
| WDR51A  | WD repeat protein 51A                                                                                                                                                                                                                                          |  | 14.7814 | -11.1  | 0.045355 | 273  | 15 | 1 | 43 [+] |
| WDR5B   | WD repeat protein 5B                                                                                                                                                                                                                                           |  | 14.7814 | -15.07 | 0.045355 | 279  | 14 | 1 | 47 [+] |
| WDR69   | WD repeat protein 69                                                                                                                                                                                                                                           |  | 14.2409 | -14.21 | 0.045452 | 372  | 20 | 6 | 60 [+] |
| WDR69   | WD repeat protein 69                                                                                                                                                                                                                                           |  | 14.8018 | -11.85 | 0.045452 | 1000 | 15 | 3 | 16 [+] |
| WDR8    | WD repeat protein 8                                                                                                                                                                                                                                            |  | 14.8018 | -17.56 | 0.045452 | 1000 | 14 | 1 | 15 [+] |
| WDR8    | WD repeat protein 8                                                                                                                                                                                                                                            |  | 14.8018 | -12.01 | 0.045452 | 1000 | 14 | 3 | 17 [+] |

|             |                                                                                                                                                                                                                                                           |         |        |          |      |    |   |        |
|-------------|-----------------------------------------------------------------------------------------------------------------------------------------------------------------------------------------------------------------------------------------------------------|---------|--------|----------|------|----|---|--------|
| WHSC1L1     | Histone-lysine N-methyltransferase NSD3 (EC 2.1.1.43) (Nuclear SET domain-containing protein 3) (WHSC1-like protein 1) (Wolf-Hirschhorn syndrome candidate 1-like protein 1) (Whistle) (WHSC1-like 1 isoform 9 with methyltransferase activity to lysine) | 14.8017 | -18.59 | 0.045455 | 363  | 16 | 1 | 46 [+] |
| WNK2        | Serine/threonine-protein kinase WNK2 (EC 2.7.11.1) (Protein kinase with no lysine 2) (Protein kinase, lysine-deficient 2)                                                                                                                                 | 14.7727 | -24.18 | 0.045753 | 1337 | 5  | 1 | 7 [+]  |
| WNK2        | Serine/threonine-protein kinase WNK2 (EC 2.7.11.1) (Protein kinase with no lysine 2) (Protein kinase, lysine-deficient 2)                                                                                                                                 | 14.7725 | -16.16 | 0.045763 | 1020 | 12 | 3 | 16 [+] |
| WNT7B       | Protein Wnt-7b precursor                                                                                                                                                                                                                                  | 14.7724 | -16.08 | 0.045769 | 1887 | 7  | 1 | 7 [+]  |
| XBP1        | X box-binding protein 1 (XBP-1) (Tax-responsive element-binding protein 5)                                                                                                                                                                                | 14.2088 | -11.75 | 0.045817 | 1027 | 14 | 6 | 17 [+] |
| XR_017738.1 | CDNA FLJ11235 fis, clone PLACE1008488                                                                                                                                                                                                                     | 14.7712 | -12.47 | 0.045825 | 594  | 10 | 1 | 17 [+] |
| XR_017939.1 | MGC4294 protein                                                                                                                                                                                                                                           | 14.7663 | -12.93 | 0.046051 | 844  | 10 | 2 | 15 [+] |
| XRN2        | 5'-3' exoribonuclease 2 (EC 3.1.13.-) (DHM1-like protein) (DHP protein)                                                                                                                                                                                   | 14.7651 | -14.71 | 0.046107 | 1097 | 15 | 3 | 21 [+] |
| YY1AP1      | YY1-associated protein 1 (Hepatocellular carcinoma susceptibility protein) (Hepatocellular carcinoma-associated protein 2)                                                                                                                                | 14.7636 | -14.31 | 0.046176 | 1000 | 15 | 2 | 20 [+] |
| YY1AP1      | YY1-associated protein 1 (Hepatocellular carcinoma susceptibility protein) (Hepatocellular carcinoma-associated protein 2)                                                                                                                                | 14.7605 | -20.79 | 0.046319 | 1000 | 21 | 1 | 26 [+] |
| YY1AP1      | YY1-associated protein 1 (Hepatocellular carcinoma susceptibility protein) (Hepatocellular carcinoma-associated protein 2)                                                                                                                                | 14.7589 | -20.46 | 0.046393 | 1000 | 20 | 1 | 24 [+] |

|            |                                                                                                                                     |  |         |        |          |      |    |   |        |
|------------|-------------------------------------------------------------------------------------------------------------------------------------|--|---------|--------|----------|------|----|---|--------|
| YY1AP1     | YY1-associated protein 1 (Hepatocellular carcinoma susceptibility protein) (Hepatocellular carcinoma-associated protein 2)          |  | 14.7018 | -20.31 | 0.046401 | 1000 | 16 | 3 | 18 [+] |
| YY1AP1     | YY1-associated protein 1 (Hepatocellular carcinoma susceptibility protein) (Hepatocellular carcinoma-associated protein 2)          |  | 14.7814 | -17.63 | 0.046416 | 287  | 14 | 1 | 44 [+] |
| YYY4_HUMAN | Very putative protein from MEG3 locus                                                                                               |  | 14.7814 | -16.01 | 0.046416 | 201  | 9  | 1 | 21 [+] |
| ZBTB17     | Zinc finger and BTB domain-containing protein 17 (Zinc finger protein 151) (Myc-interacting zinc finger protein) (Miz-1 protein)    |  | 14.7814 | -16.01 | 0.046416 | 203  | 9  | 1 | 21 [+] |
| ZBTB17     | Zinc finger and BTB domain-containing protein 17 (Zinc finger protein 151) (Myc-interacting zinc finger protein) (Miz-1 protein)    |  | 14.7814 | -16.01 | 0.046416 | 202  | 9  | 1 | 21 [+] |
| ZBTB46     | Zinc finger and BTB domain-containing protein 46 (BTB/POZ domain-containing protein 4) (Zinc finger protein 340)                    |  | 14.7814 | -16.01 | 0.046416 | 211  | 9  | 1 | 22 [+] |
| ZBTB8      | Zinc finger and BTB domain-containing protein 8                                                                                     |  | 14.7814 | -16.01 | 0.046416 | 200  | 9  | 1 | 21 [+] |
| ZCCHC13    | Zinc finger CCHC domain-containing protein 13                                                                                       |  | 14.7571 | -15.97 | 0.046479 | 373  | 20 | 6 | 61 [+] |
| ZCCHC13    | Zinc finger CCHC domain-containing protein 13                                                                                       |  | 14.7482 | -15.58 | 0.046528 | 1000 | 16 | 2 | 30 [+] |
| ZCCHC7     | Zinc finger CCHC domain-containing protein 7                                                                                        |  | 14.7782 | -18.46 | 0.046569 | 394  | 16 | 1 | 35 [+] |
| ZDHHC4     | Probable palmitoyltransferase ZDHHC4 (EC 2.3.1.-) (Zinc finger DHHC domain-containing protein 4) (DHHC-4) (Zinc finger protein 374) |  | 14.7776 | -20.37 | 0.0466   | 1000 | 10 | 1 | 14 [+] |

|         |                                                                                                                                                                 |         |        |          |      |    |   |        |
|---------|-----------------------------------------------------------------------------------------------------------------------------------------------------------------|---------|--------|----------|------|----|---|--------|
| ZDHHC6  | Probable palmitoyltransferase ZDHHC6 (EC 2.3.1.-) (Zinc finger DHHC domain-containing protein 6) (DHHC-6) (Zinc finger protein 376) (Transmembrane protein 114) | 14.7532 | -19.08 | 0.046662 | 1679 | 1  | 1 | 1 [+]  |
| ZFAND3  | AN1-type zinc finger protein 3 (Testis-expressed sequence 27)                                                                                                   | 14.7364 | -15.81 | 0.046767 | 1740 | 7  | 2 | 7 [+]  |
| ZFHX2   | Zinc finger homeobox protein 2 (Zinc finger homeodomain protein 2) (ZFH-2)                                                                                      | 14.7735 | -16.23 | 0.046796 | 844  | 10 | 1 | 18 [+] |
| ZFX     | Zinc finger X-chromosomal protein                                                                                                                               | 14.7494 | -17.14 | 0.046841 | 577  | 16 | 1 | 25 [+] |
| ZKSCAN3 | Zinc finger protein 306 (Zinc finger protein 47 homolog) (Zfp-47) (Zf47) (Zinc finger and SCAN domain-containing protein 13)                                    | 14.318  | -13.18 | 0.047084 | 1000 | 14 | 2 | 22 [+] |
| ZKSCAN3 | Zinc finger protein 306 (Zinc finger protein 47 homolog) (Zfp-47) (Zf47) (Zinc finger and SCAN domain-containing protein 13)                                    | 14.7651 | -20.77 | 0.047201 | 1000 | 9  | 1 | 10 [+] |
| ZNF124  | Zinc finger protein 124 (HZF-16)                                                                                                                                | 14.7648 | -11.63 | 0.047215 | 782  | 7  | 1 | 10 [+] |
| ZNF169  | Zinc finger protein 169                                                                                                                                         | 14.7406 | -16.68 | 0.047255 | 1000 | 7  | 1 | 7 [+]  |
| ZNF2    | Zinc finger protein 2 (Zinc finger 2.2) (Zinc finger protein 661)                                                                                               | 14.7404 | -14.67 | 0.047264 | 1207 | 10 | 1 | 11 [+] |
| ZNF3    | Zinc finger protein 38 (Zinc finger protein KOX25) (Zinc finger protein HF.12) (Zinc finger protein 3) (HZF3.1)                                                 | 14.7615 | -14.48 | 0.047379 | 484  | 17 | 2 | 32 [+] |
| ZNF347  | Zinc finger protein 347 (Zinc finger protein 1111)                                                                                                              | 14.7376 | -14.79 | 0.047399 | 1000 | 20 | 4 | 27 [+] |
| ZNF35   | Zinc finger protein 35 (Zinc finger protein HF.10)                                                                                                              | 14.7376 | -12.07 | 0.047399 | 984  | 19 | 5 | 23 [+] |
| ZNF350  | Zinc finger protein 350 (Zinc-finger protein ZBRK1) (Zinc finger and BRCA1-interacting protein with a KRAB domain 1) (KRAB zinc finger protein ZFQR)            | 14.7361 | -11.89 | 0.047471 | 1000 | 10 | 1 | 12 [+] |
| ZNF382  | Zinc finger protein 382 (KRAB/Zinc finger suppressor protein 1) (KS1)                                                                                           | 14.7354 | -18.56 | 0.047501 | 352  | 14 | 1 | 40 [+] |
| ZNF407  | zinc finger protein 407                                                                                                                                         | 14.3933 | -13.01 | 0.047603 | 663  | 21 | 3 | 35 [+] |

|        |                                                                                                                         |  |         |        |          |      |    |    |        |
|--------|-------------------------------------------------------------------------------------------------------------------------|--|---------|--------|----------|------|----|----|--------|
| ZNF434 | Zinc finger protein 434                                                                                                 |  | 14.7331 | -16.7  | 0.047613 | 464  | 23 | 4  | 59 [+] |
| ZNF444 | Zinc finger protein 444 (Endothelial zinc finger protein 2) (EZF-2) (Zinc finger and SCAN domain-containing protein 17) |  | 14.733  | -14.42 | 0.047615 | 1000 | 11 | 1  | 12 [+] |
| ZNF446 | Zinc finger protein 446                                                                                                 |  | 14.7543 | -17.29 | 0.047728 | 1000 | 19 | 1  | 23 [+] |
| ZNF467 | Zinc finger protein 467                                                                                                 |  | 14.7262 | -14.61 | 0.047945 | 1000 | 10 | 1  | 17 [+] |
| ZNF508 | Zinc finger protein 508                                                                                                 |  | 14.724  | -18.11 | 0.048048 | 1000 | 9  | 1  | 16 [+] |
| ZNF534 | Zinc finger protein 534 (Fragment)                                                                                      |  | 14.3692 | -16.03 | 0.048073 | 890  | 25 | 5  | 37 [+] |
| ZNF575 | Zinc finger protein 575                                                                                                 |  | 14.7225 | -19.99 | 0.04812  | 1000 | 11 | 1  | 12 [+] |
| ZNF576 | Zinc finger protein 576                                                                                                 |  | 14.7216 | -17.79 | 0.048166 | 625  | 14 | 1  | 31 [+] |
| ZNF655 | Zinc finger protein 655 (Vav-interacting Krueppel-like protein)                                                         |  | 14.7216 | -21.91 | 0.048167 | 2386 | 3  | 1  | 3 [+]  |
| ZNF683 | Zinc finger protein 683                                                                                                 |  | 14.7204 | -20.55 | 0.048225 | 512  | 16 | 9  | 54 [+] |
| ZNF696 | Zinc finger protein 696                                                                                                 |  | 14.7195 | -15.63 | 0.048264 | 1000 | 9  | 1  | 11 [+] |
|        | NOT ANNOTATED                                                                                                           |  | 14.7434 | -20.51 | 0.048267 | 461  | 22 | 1  | 36 [+] |
|        | NOT ANNOTATED                                                                                                           |  | 14.7421 | -18.12 | 0.048332 | 1000 | 6  | 1  | 8 [+]  |
|        | NOT ANNOTATED                                                                                                           |  | 14.7419 | -18.08 | 0.048345 | 1462 | 8  | 1  | 8 [+]  |
|        | NOT ANNOTATED                                                                                                           |  | 14.7168 | -12.55 | 0.048397 | 537  | 16 | 12 | 32 [+] |
|        | NOT ANNOTATED                                                                                                           |  | 14.7151 | -18.6  | 0.048481 | 1000 | 10 | 1  | 8 [+]  |
|        | NOT ANNOTATED                                                                                                           |  | 14.7134 | -17.79 | 0.048561 | 594  | 14 | 1  | 31 [+] |
|        | NOT ANNOTATED                                                                                                           |  | 14.7374 | -22.32 | 0.048566 | 2922 | 5  | 7  | 5 [+]  |
|        | NOT ANNOTATED                                                                                                           |  | 14.7348 | -14.07 | 0.048698 | 1153 | 13 | 3  | 15 [+] |
|        | RIKEN cDNA C330018D20 gene.<br>RIKEN cDNA C330018D20 gene . BY<br>ORTHOLOGY<br>TO:ENSRNOT00000018368                    |  | 14.7105 | -11.39 | 0.048706 | 409  | 18 | 7  | 55 [+] |
|        | NOT ANNOTATED                                                                                                           |  | 14.7097 | -10.67 | 0.048743 | 411  | 16 | 1  | 31 [+] |
|        | NOT ANNOTATED                                                                                                           |  | 14.7083 | -19.6  | 0.048812 | 869  | 11 | 1  | 14 [+] |
|        | NOT ANNOTATED                                                                                                           |  | 14.7078 | -15.81 | 0.048838 | 1130 | 7  | 1  | 9 [+]  |
|        | NOT ANNOTATED                                                                                                           |  | 14.7068 | -15.9  | 0.048887 | 1725 | 5  | 1  | 4 [+]  |

|                                                                                                                                                                                            |  |         |        |          |      |    |   |        |
|--------------------------------------------------------------------------------------------------------------------------------------------------------------------------------------------|--|---------|--------|----------|------|----|---|--------|
| PREDICTED: Bos taurus hypothetical protein LOC782021 (LOC782021), mRNA.<br>PREDICTED: Bos taurus hypothetical protein LOC782021 (LOC782021), mRNA<br>BY ORTHOLOGY<br>TO:ENSBTAT00000002160 |  | 14.7018 | -16.24 | 0.049132 | 1000 | 9  | 1 | 12 [+] |
| NOT ANNOTATED                                                                                                                                                                              |  | 14.7018 | -13.28 | 0.049132 | 1000 | 10 | 1 | 11 [+] |
| NOT ANNOTATED                                                                                                                                                                              |  | 14.7018 | -13.42 | 0.049132 | 1000 | 22 | 5 | 26 [+] |
| NOT ANNOTATED                                                                                                                                                                              |  | 14.7018 | -12.86 | 0.049132 | 1000 | 11 | 1 | 10 [+] |
| NOT ANNOTATED                                                                                                                                                                              |  | 14.7018 | -14.87 | 0.049132 | 1000 | 15 | 2 | 18 [+] |
| NOT ANNOTATED                                                                                                                                                                              |  | 14.7018 | -13.28 | 0.049132 | 1000 | 12 | 1 | 14 [+] |
| NOT ANNOTATED                                                                                                                                                                              |  | 14.7018 | -17.25 | 0.049132 | 1000 | 13 | 3 | 16 [+] |
| NOT ANNOTATED                                                                                                                                                                              |  | 14.7018 | -26.9  | 0.049132 | 1000 | 12 | 1 | 17 [+] |
| NOT ANNOTATED                                                                                                                                                                              |  | 14.3017 | -14.1  | 0.049173 | 1000 | 19 | 7 | 26 [+] |
| NOT ANNOTATED                                                                                                                                                                              |  | 14.6929 | -18.51 | 0.049569 | 900  | 14 | 1 | 19 [+] |
| gene model 1568, (NCBI) gene model 1568, (NCBI)<br>BY ORTHOLOGY<br>TO:ENSMUST00000073251                                                                                                   |  | 14.691  | -16.84 | 0.049667 | 339  | 18 | 3 | 60 [+] |
| NOT ANNOTATED                                                                                                                                                                              |  | 14.7153 | -20.55 | 0.049683 | 755  | 16 | 1 | 20 [+] |
| NOT ANNOTATED                                                                                                                                                                              |  | 14.6886 | -15.02 | 0.049783 | 389  | 21 | 4 | 46 [+] |
| NOT ANNOTATED                                                                                                                                                                              |  | 14.6886 | -13.85 | 0.049784 | 1009 | 22 | 5 | 28 [+] |

**Supplementary Table 19. Predicted targets of hsa-miR-181a by miRWALK.**

| <b>Gene</b>   | <b>RefseqID</b>     | <b>Seed Length</b> | <b>Start</b> | <b>Sequence</b> | <b>End</b> | <b>Region</b> | <b>P value</b> | <b>SPMS</b> |
|---------------|---------------------|--------------------|--------------|-----------------|------------|---------------|----------------|-------------|
| <u>AASS</u>   | <u>NM_005763</u>    | 9                  | 5809         | AACAUCUCAA      | 5801       | 3 UTR         | 0.0112         | 1           |
| <u>AASS</u>   | <u>NM_005763</u>    | 8                  | 5808         | ACAUCUCAA       | 5801       | 3 UTR         | 0.0442         | 2           |
| <u>AASS</u>   | <u>NM_005763</u>    | 9                  | 5809         | AACAUCUCAA      | 5801       | 3 UTR         | 0.0112         | 1           |
| <u>AASS</u>   | <u>NM_005763</u>    | 8                  | 5808         | ACAUCUCAA       | 5801       | 3 UTR         | 0.0442         | 2           |
| <u>ABCB11</u> | <u>NM_003742</u>    | 7                  | 4210         | AACAUCUC        | 4204       | 3 UTR         | 0.0408         | 1           |
| <u>ABCB11</u> | <u>NM_003742</u>    | 7                  | 4210         | AACAUCUC        | 4204       | 3 UTR         | 0.0408         | 1           |
| <u>ABI1</u>   | <u>NM_005470</u>    | 8                  | 1831         | ACAUCUCAA       | 1824       | 3 UTR         | 0.0297         | 2           |
| <u>ABI1</u>   | <u>NM_005470</u>    | 8                  | 1831         | ACAUCUCAA       | 1824       | 3 UTR         | 0.0297         | 2           |
| <u>ABLIM1</u> | <u>NM_001003408</u> | 9                  | 3780         | AACAUCUCAA      | 3772       | 3 UTR         | 0.0195         | 1           |
| <u>ABLIM1</u> | <u>NM_001003408</u> | 9                  | 3780         | AACAUCUCAA      | 3772       | 3 UTR         | 0.0195         | 1           |
| <u>ACBD4</u>  | <u>NM_024722</u>    | 7                  | 1997         | AACAUCUC        | 1991       | 3 UTR         | 0.0378         | 1           |
| <u>ACBD4</u>  | <u>NM_024722</u>    | 7                  | 1997         | AACAUCUC        | 1991       | 3 UTR         | 0.0378         | 1           |
| <u>ACBD6</u>  | <u>NM_032360</u>    | 7                  | 1181         | ACAUUCA         | 1175       | 3 UTR         | 0.0098         | 2           |
| <u>ACBD6</u>  | <u>NM_032360</u>    | 7                  | 1181         | ACAUUCA         | 1175       | 3 UTR         | 0.0098         | 2           |
| <u>ACMSD</u>  | <u>NM_138326</u>    | 7                  | 1193         | ACAUUCA         | 1187       | 3 UTR         | 0.0121         | 2           |
| <u>ACMSD</u>  | <u>NM_138326</u>    | 7                  | 1193         | ACAUUCA         | 1187       | 3 UTR         | 0.0121         | 2           |
| <u>ACN9</u>   | <u>NM_020186</u>    | 7                  | 1950         | ACAUUCA         | 1944       | 3 UTR         | 0.0335         | 2           |
| <u>ACN9</u>   | <u>NM_020186</u>    | 7                  | 1950         | ACAUUCA         | 1944       | 3 UTR         | 0.0335         | 2           |
| <u>ACRC</u>   | <u>NM_052957</u>    | 7                  | 2439         | ACAUUCA         | 2433       | 3 UTR         | 0.0360         | 2           |
| <u>ACRC</u>   | <u>NM_052957</u>    | 7                  | 2439         | ACAUUCA         | 2433       | 3 UTR         | 0.0360         | 2           |
| <u>ACSF3</u>  | <u>NM_174917</u>    | 8                  | 2964         | AACAUUCA        | 2957       | 3 UTR         | 0.0234         | 1           |
| <u>ACSF3</u>  | <u>NM_174917</u>    | 8                  | 2964         | AACAUUCA        | 2957       | 3 UTR         | 0.0234         | 1           |
| <u>ACSL1</u>  | <u>NM_001995</u>    | 9                  | 3707         | AACAUCUCAA      | 3699       | 3 UTR         | 0.0059         | 1           |
| <u>ACSL1</u>  | <u>NM_001995</u>    | 8                  | 3706         | ACAUCUCAA       | 3699       | 3 UTR         | 0.0233         | 2           |
| <u>ACSL1</u>  | <u>NM_001995</u>    | 9                  | 3707         | AACAUCUCAA      | 3699       | 3 UTR         | 0.0059         | 1           |
| <u>ACSL1</u>  | <u>NM_001995</u>    | 8                  | 3706         | ACAUCUCAA       | 3699       | 3 UTR         | 0.0233         | 2           |
| <u>ACSS3</u>  | <u>NM_024560</u>    | 8                  | 2386         | ACAUCUCAA       | 2379       | 3 UTR         | 0.0134         | 2           |
| <u>ACSS3</u>  | <u>NM_024560</u>    | 8                  | 2386         | ACAUCUCAA       | 2379       | 3 UTR         | 0.0134         | 2           |
| <u>ACTA2</u>  | <u>NM_001613</u>    | 7                  | 1296         | ACAUUCA         | 1290       | 3 UTR         | 0.0100         | 2           |
| <u>ACTA2</u>  | <u>NM_001613</u>    | 7                  | 1296         | ACAUUCA         | 1290       | 3 UTR         | 0.0100         | 2           |
| <u>ACTC1</u>  | <u>NM_005159</u>    | 8                  | 2322         | ACAUCUCAA       | 2315       | 3 UTR         | 0.0347         | 2           |
| <u>ACTC1</u>  | <u>NM_005159</u>    | 8                  | 2322         | ACAUCUCAA       | 2315       | 3 UTR         | 0.0347         | 2           |
| <u>ACTL6A</u> | <u>NM_178042</u>    | 7                  | 1606         | AACAUCUC        | 1600       | 3 UTR         | 0.0268         | 1           |
| <u>ACTL6A</u> | <u>NM_178042</u>    | 7                  | 1606         | AACAUCUC        | 1600       | 3 UTR         | 0.0268         | 1           |
| <u>ACTR2</u>  | <u>NM_001005386</u> | 8                  | 3392         | ACAUCUCAA       | 3385       | 3 UTR         | 0.0379         | 2           |



|                |                     |    |       |          |       |       |        |   |
|----------------|---------------------|----|-------|----------|-------|-------|--------|---|
| <u>ACTR2</u>   | <u>NM_001005386</u> | 8  | 3392  | ACAUUCA  | 3385  | 3 UTR | 0.0379 | 2 |
| <u>ACVR2B</u>  | <u>NM_001106</u>    | 9  | 6762  | AACAUUCA | 6754  | 3 UTR | 0.0367 | 1 |
| <u>ACVR2B</u>  | <u>NM_001106</u>    | 9  | 6762  | AACAUUCA | 6754  | 3 UTR | 0.0367 | 1 |
| <u>ACYPI</u>   | <u>NM_203488</u>    | 9  | 595   | AACAUUCA | 587   | 3 UTR | 0.0017 | 1 |
| <u>ACYPI</u>   | <u>NM_203488</u>    | 8  | 594   | ACAUUCA  | 587   | 3 UTR | 0.0068 | 2 |
| <u>ACYPI</u>   | <u>NM_203488</u>    | 9  | 595   | AACAUUCA | 587   | 3 UTR | 0.0017 | 1 |
| <u>ACYPI</u>   | <u>NM_203488</u>    | 8  | 594   | ACAUUCA  | 587   | 3 UTR | 0.0068 | 2 |
| <u>ADAM28</u>  | <u>NM_014265</u>    | 8  | 3159  | ACAUUCA  | 3152  | 3 UTR | 0.0123 | 2 |
| <u>ADAM28</u>  | <u>NM_014265</u>    | 8  | 3159  | ACAUUCA  | 3152  | 3 UTR | 0.0123 | 2 |
| <u>ADAMTS8</u> | <u>NM_007037</u>    | 7  | 3461  | ACAUUCA  | 3455  | 3 UTR | 0.0390 | 2 |
| <u>ADAMTS8</u> | <u>NM_007037</u>    | 7  | 3461  | ACAUUCA  | 3455  | 3 UTR | 0.0390 | 2 |
| <u>ADCY9</u>   | <u>NM_001116</u>    | 8  | 7161  | ACAUUCA  | 7154  | 3 UTR | 0.0467 | 2 |
| <u>ADCY9</u>   | <u>NM_001116</u>    | 8  | 6628  | ACAUUCA  | 6621  | 3 UTR | 0.0467 | 2 |
| <u>ADCY9</u>   | <u>NM_001116</u>    | 8  | 7161  | ACAUUCA  | 7154  | 3 UTR | 0.0467 | 2 |
| <u>ADCY9</u>   | <u>NM_001116</u>    | 8  | 6628  | ACAUUCA  | 6621  | 3 UTR | 0.0467 | 2 |
| <u>ADH4</u>    | <u>NM_000670</u>    | 8  | 1259  | ACAUUCA  | 1252  | 3 UTR | 0.0115 | 2 |
| <u>ADH4</u>    | <u>NM_000670</u>    | 8  | 1259  | ACAUUCA  | 1252  | 3 UTR | 0.0115 | 2 |
| <u>ADM</u>     | <u>NM_001124</u>    | 7  | 1296  | ACAUUCA  | 1290  | 3 UTR | 0.0439 | 2 |
| <u>ADM</u>     | <u>NM_001124</u>    | 7  | 1296  | ACAUUCA  | 1290  | 3 UTR | 0.0439 | 2 |
| <u>ADRBK1</u>  | <u>NM_001619</u>    | 8  | 3388  | ACAUUCA  | 3381  | 3 UTR | 0.0173 | 2 |
| <u>ADRBK1</u>  | <u>NM_001619</u>    | 8  | 3388  | ACAUUCA  | 3381  | 3 UTR | 0.0173 | 2 |
| <u>AFF2</u>    | <u>NM_002025</u>    | 10 | 10612 | AACAUUCA | 10603 | 3 UTR | 0.0089 | 1 |
| <u>AFF2</u>    | <u>NM_002025</u>    | 9  | 10611 | ACAUUCA  | 10603 | 3 UTR | 0.0350 | 2 |
| <u>AFF2</u>    | <u>NM_002025</u>    | 10 | 10612 | AACAUUCA | 10603 | 3 UTR | 0.0089 | 1 |
| <u>AFF2</u>    | <u>NM_002025</u>    | 9  | 10611 | ACAUUCA  | 10603 | 3 UTR | 0.0350 | 2 |
| <u>AGPAT5</u>  | <u>NM_018361</u>    | 9  | 3349  | AACAUUCA | 3341  | 3 UTR | 0.0156 | 1 |
| <u>AGPAT5</u>  | <u>NM_018361</u>    | 9  | 3349  | AACAUUCA | 3341  | 3 UTR | 0.0156 | 1 |
| <u>AGT</u>     | <u>NM_000029</u>    | 8  | 2405  | ACAUUCA  | 2398  | 3 UTR | 0.0094 | 2 |
| <u>AGT</u>     | <u>NM_000029</u>    | 8  | 2405  | ACAUUCA  | 2398  | 3 UTR | 0.0094 | 2 |
| <u>AGXT</u>    | <u>NM_000030</u>    | 7  | 1570  | AACAUUC  | 1564  | 3 UTR | 0.0188 | 1 |
| <u>AGXT</u>    | <u>NM_000030</u>    | 7  | 1570  | AACAUUC  | 1564  | 3 UTR | 0.0188 | 1 |
| <u>AHR</u>     | <u>NM_001621</u>    | 10 | 4126  | AACAUUCA | 4117  | 3 UTR | 0.0026 | 1 |
| <u>AHR</u>     | <u>NM_001621</u>    | 9  | 4125  | ACAUUCA  | 4117  | 3 UTR | 0.0102 | 2 |
| <u>AHR</u>     | <u>NM_001621</u>    | 10 | 4126  | AACAUUCA | 4117  | 3 UTR | 0.0026 | 1 |
| <u>AHR</u>     | <u>NM_001621</u>    | 9  | 4125  | ACAUUCA  | 4117  | 3 UTR | 0.0102 | 2 |
| <u>AICDA</u>   | <u>NM_020661</u>    | 9  | 1532  | AACAUUCA | 1524  | 3 UTR | 0.0080 | 1 |
| <u>AICDA</u>   | <u>NM_020661</u>    | 8  | 1531  | ACAUUCA  | 1524  | 3 UTR | 0.0318 | 2 |
| <u>AICDA</u>   | <u>NM_020661</u>    | 9  | 1532  | AACAUUCA | 1524  | 3 UTR | 0.0080 | 1 |

|                 |                     |   |       |          |       |       |        |   |
|-----------------|---------------------|---|-------|----------|-------|-------|--------|---|
| <u>AICDA</u>    | <u>NM_020661</u>    | 8 | 1531  | ACAUUCA  | 1524  | 3 UTR | 0.0318 | 2 |
| <u>AIM1L</u>    | <u>NM_001039775</u> | 8 | 2332  | AACAUUCA | 2325  | 3 UTR | 0.0017 | 1 |
| <u>AIM1L</u>    | <u>NM_001039775</u> | 7 | 2331  | ACAUUCA  | 2325  | 3 UTR | 0.0066 | 2 |
| <u>AIM1L</u>    | <u>NM_001039775</u> | 8 | 2332  | AACAUUCA | 2325  | 3 UTR | 0.0017 | 1 |
| <u>AIM1L</u>    | <u>NM_001039775</u> | 7 | 2331  | ACAUUCA  | 2325  | 3 UTR | 0.0066 | 2 |
| <u>AK3</u>      | <u>NM_016282</u>    | 9 | 2415  | AACAUUCA | 2407  | 3 UTR | 0.0069 | 1 |
| <u>AK3</u>      | <u>NM_016282</u>    | 8 | 2414  | ACAUUCA  | 2407  | 3 UTR | 0.0274 | 2 |
| <u>AK3</u>      | <u>NM_016282</u>    | 9 | 2415  | AACAUUCA | 2407  | 3 UTR | 0.0069 | 1 |
| <u>AK3</u>      | <u>NM_016282</u>    | 8 | 2414  | ACAUUCA  | 2407  | 3 UTR | 0.0274 | 2 |
| <u>AKAP4</u>    | <u>NM_003886</u>    | 7 | 2827  | ACAUUCA  | 2821  | 3 UTR | 0.0117 | 2 |
| <u>AKAP4</u>    | <u>NM_003886</u>    | 7 | 2827  | ACAUUCA  | 2821  | 3 UTR | 0.0117 | 2 |
| <u>AKAP6</u>    | <u>NM_004274</u>    | 8 | 10232 | AACAUUCA | 10225 | 3 UTR | 0.0488 | 1 |
| <u>AKAP6</u>    | <u>NM_004274</u>    | 8 | 10232 | AACAUUCA | 10225 | 3 UTR | 0.0488 | 1 |
| <u>AKAP7</u>    | <u>NM_016377</u>    | 9 | 2321  | AACAUUCA | 2313  | 3 UTR | 0.0070 | 1 |
| <u>AKAP7</u>    | <u>NM_016377</u>    | 8 | 2320  | ACAUUCA  | 2313  | 3 UTR | 0.0275 | 2 |
| <u>AKAP7</u>    | <u>NM_016377</u>    | 9 | 2321  | AACAUUCA | 2313  | 3 UTR | 0.0070 | 1 |
| <u>AKAP7</u>    | <u>NM_016377</u>    | 8 | 2320  | ACAUUCA  | 2313  | 3 UTR | 0.0275 | 2 |
| <u>AKAP9</u>    | <u>NM_147171</u>    | 7 | 12279 | ACAUUCA  | 12273 | 3 UTR | 0.0310 | 2 |
| <u>AKAP9</u>    | <u>NM_147171</u>    | 7 | 12279 | ACAUUCA  | 12273 | 3 UTR | 0.0310 | 2 |
| <u>AKT3</u>     | <u>NM_005465</u>    | 8 | 2506  | ACAUUCA  | 2499  | 3 UTR | 0.0310 | 2 |
| <u>AKT3</u>     | <u>NM_005465</u>    | 8 | 2506  | ACAUUCA  | 2499  | 3 UTR | 0.0310 | 2 |
| <u>ALDH9A1</u>  | <u>NM_000696</u>    | 8 | 1748  | AACAUUCA | 1741  | 3 UTR | 0.0127 | 1 |
| <u>ALDH9A1</u>  | <u>NM_000696</u>    | 7 | 2312  | ACAUUCA  | 2306  | 3 UTR | 0.0499 | 2 |
| <u>ALDH9A1</u>  | <u>NM_000696</u>    | 7 | 1747  | ACAUUCA  | 1741  | 3 UTR | 0.0499 | 2 |
| <u>ALDH9A1</u>  | <u>NM_000696</u>    | 8 | 1748  | AACAUUCA | 1741  | 3 UTR | 0.0127 | 1 |
| <u>ALDH9A1</u>  | <u>NM_000696</u>    | 7 | 2312  | ACAUUCA  | 2306  | 3 UTR | 0.0499 | 2 |
| <u>ALDH9A1</u>  | <u>NM_000696</u>    | 7 | 1747  | ACAUUCA  | 1741  | 3 UTR | 0.0499 | 2 |
| <u>ALG10</u>    | <u>NM_032834</u>    | 8 | 2815  | ACAUUCA  | 2808  | 3 UTR | 0.0212 | 2 |
| <u>ALG10</u>    | <u>NM_032834</u>    | 8 | 2815  | ACAUUCA  | 2808  | 3 UTR | 0.0212 | 2 |
| <u>ALG2</u>     | <u>NM_033087</u>    | 8 | 1450  | ACAUUCA  | 1443  | 3 UTR | 0.0228 | 2 |
| <u>ALG2</u>     | <u>NM_033087</u>    | 8 | 1450  | ACAUUCA  | 1443  | 3 UTR | 0.0228 | 2 |
| <u>ALG6</u>     | <u>NM_013339</u>    | 7 | 3264  | AACAUUC  | 3258  | 3 UTR | 0.0128 | 1 |
| <u>ALG6</u>     | <u>NM_013339</u>    | 7 | 3264  | AACAUUC  | 3258  | 3 UTR | 0.0128 | 1 |
| <u>ALS2CR12</u> | <u>NM_139163</u>    | 7 | 1916  | ACAUUCA  | 1910  | 3 UTR | 0.0140 | 2 |
| <u>ALS2CR12</u> | <u>NM_139163</u>    | 7 | 1916  | ACAUUCA  | 1910  | 3 UTR | 0.0140 | 2 |
| <u>AMAC1</u>    | <u>NM_152462</u>    | 7 | 1562  | ACAUUCA  | 1556  | 3 UTR | 0.0460 | 2 |
| <u>AMAC1</u>    | <u>NM_152462</u>    | 7 | 1562  | ACAUUCA  | 1556  | 3 UTR | 0.0460 | 2 |
| <u>ANKLE1</u>   | <u>NM_152363</u>    | 9 | 2171  | AACAUUCA | 2163  | 3 UTR | 0.0042 | 1 |

|                 |                  |    |      |            |      |       |        |   |
|-----------------|------------------|----|------|------------|------|-------|--------|---|
| <u>ANKLE1</u>   | <u>NM_152363</u> | 8  | 2170 | ACAUUCAA   | 2163 | 3 UTR | 0.0165 | 2 |
| <u>ANKLE1</u>   | <u>NM_152363</u> | 9  | 2171 | AACAUUCA   | 2163 | 3 UTR | 0.0042 | 1 |
| <u>ANKLE1</u>   | <u>NM_152363</u> | 8  | 2170 | ACAUUCAA   | 2163 | 3 UTR | 0.0165 | 2 |
| <u>ANKRD13C</u> | <u>NM_030816</u> | 9  | 2480 | AACAUUCA   | 2472 | 3 UTR | 0.0141 | 1 |
| <u>ANKRD13C</u> | <u>NM_030816</u> | 9  | 2480 | AACAUUCA   | 2472 | 3 UTR | 0.0141 | 1 |
| <u>ANKRD27</u>  | <u>NM_032139</u> | 8  | 4037 | ACAUUCAA   | 4030 | 3 UTR | 0.0174 | 2 |
| <u>ANKRD27</u>  | <u>NM_032139</u> | 8  | 4037 | ACAUUCAA   | 4030 | 3 UTR | 0.0174 | 2 |
| <u>ANKRD50</u>  | <u>NM_020337</u> | 8  | 7193 | AACAUUCA   | 7186 | 3 UTR | 0.0478 | 1 |
| <u>ANKRD50</u>  | <u>NM_020337</u> | 8  | 6365 | AACAUUCA   | 6358 | 3 UTR | 0.0478 | 1 |
| <u>ANKRD50</u>  | <u>NM_020337</u> | 8  | 7193 | AACAUUCA   | 7186 | 3 UTR | 0.0478 | 1 |
| <u>ANKRD50</u>  | <u>NM_020337</u> | 8  | 6365 | AACAUUCA   | 6358 | 3 UTR | 0.0478 | 1 |
| <u>ANP32A</u>   | <u>NM_006305</u> | 7  | 2444 | AACAUUC    | 2438 | 3 UTR | 0.0153 | 1 |
| <u>ANP32A</u>   | <u>NM_006305</u> | 7  | 1914 | ACAUUCA    | 1908 | 3 UTR | 0.0153 | 2 |
| <u>ANP32A</u>   | <u>NM_006305</u> | 7  | 2444 | AACAUUC    | 2438 | 3 UTR | 0.0153 | 1 |
| <u>ANP32A</u>   | <u>NM_006305</u> | 7  | 1914 | ACAUUCA    | 1908 | 3 UTR | 0.0153 | 2 |
| <u>ANTXR2</u>   | <u>NM_058172</u> | 8  | 2532 | ACAUUCAA   | 2525 | 3 UTR | 0.0282 | 2 |
| <u>ANTXR2</u>   | <u>NM_058172</u> | 8  | 2532 | ACAUUCAA   | 2525 | 3 UTR | 0.0282 | 2 |
| <u>ANXA11</u>   | <u>NM_145869</u> | 7  | 2668 | ACAUUCA    | 2662 | 3 UTR | 0.0436 | 2 |
| <u>ANXA11</u>   | <u>NM_145869</u> | 7  | 2668 | ACAUUCA    | 2662 | 3 UTR | 0.0436 | 2 |
| <u>ANXA6</u>    | <u>NM_001155</u> | 9  | 2572 | ACAUUCAAC  | 2564 | 3 UTR | 0.0028 | 2 |
| <u>ANXA6</u>    | <u>NM_001155</u> | 9  | 2572 | ACAUUCAAC  | 2564 | 3 UTR | 0.0028 | 2 |
| <u>AP3D1</u>    | <u>NM_003938</u> | 8  | 3989 | ACAUUCAA   | 3982 | 3 UTR | 0.0178 | 2 |
| <u>AP3D1</u>    | <u>NM_003938</u> | 8  | 3989 | ACAUUCAA   | 3982 | 3 UTR | 0.0178 | 2 |
| <u>AP3S2</u>    | <u>NM_005829</u> | 9  | 3487 | AACAUUCA   | 3479 | 3 UTR | 0.0186 | 1 |
| <u>AP3S2</u>    | <u>NM_005829</u> | 9  | 3487 | AACAUUCA   | 3479 | 3 UTR | 0.0186 | 1 |
| <u>APH1B</u>    | <u>NM_031301</u> | 7  | 2429 | AACAUUC    | 2423 | 3 UTR | 0.0081 | 1 |
| <u>APH1B</u>    | <u>NM_031301</u> | 7  | 1282 | ACAUUCA    | 1276 | 3 UTR | 0.0081 | 2 |
| <u>APH1B</u>    | <u>NM_031301</u> | 7  | 2429 | AACAUUC    | 2423 | 3 UTR | 0.0081 | 1 |
| <u>APH1B</u>    | <u>NM_031301</u> | 7  | 1282 | ACAUUCA    | 1276 | 3 UTR | 0.0081 | 2 |
| <u>API5</u>     | <u>NM_006595</u> | 9  | 3008 | AACAUUCA   | 3000 | 3 UTR | 0.0079 | 1 |
| <u>API5</u>     | <u>NM_006595</u> | 8  | 3007 | ACAUUCAA   | 3000 | 3 UTR | 0.0314 | 2 |
| <u>API5</u>     | <u>NM_006595</u> | 9  | 3008 | AACAUUCA   | 3000 | 3 UTR | 0.0079 | 1 |
| <u>API5</u>     | <u>NM_006595</u> | 8  | 3007 | ACAUUCAA   | 3000 | 3 UTR | 0.0314 | 2 |
| <u>APOO</u>     | <u>NM_024122</u> | 8  | 936  | ACAUUCAA   | 929  | 3 UTR | 0.0047 | 2 |
| <u>APOO</u>     | <u>NM_024122</u> | 8  | 936  | ACAUUCAA   | 929  | 3 UTR | 0.0047 | 2 |
| <u>AQP9</u>     | <u>NM_020980</u> | 10 | 2372 | AACAUUCAAC | 2363 | 3 UTR | 0.0017 | 1 |
| <u>AQP9</u>     | <u>NM_020980</u> | 9  | 2371 | ACAUUCAAC  | 2363 | 3 UTR | 0.0068 | 2 |
| <u>AQP9</u>     | <u>NM_020980</u> | 10 | 2372 | AACAUUCAAC | 2363 | 3 UTR | 0.0017 | 1 |

|                 |                     |    |      |            |      |       |        |   |
|-----------------|---------------------|----|------|------------|------|-------|--------|---|
| <u>AQP9</u>     | <u>NM_020980</u>    | 9  | 2371 | ACAUUCAAC  | 2363 | 3 UTR | 0.0068 | 2 |
| <u>ARF6</u>     | <u>NM_001663</u>    | 9  | 3474 | AACAUUCA   | 3466 | 3 UTR | 0.0106 | 1 |
| <u>ARF6</u>     | <u>NM_001663</u>    | 8  | 3473 | ACAUUCA    | 3466 | 3 UTR | 0.0417 | 2 |
| <u>ARF6</u>     | <u>NM_001663</u>    | 9  | 3474 | AACAUUCA   | 3466 | 3 UTR | 0.0106 | 1 |
| <u>ARF6</u>     | <u>NM_001663</u>    | 8  | 3473 | ACAUUCA    | 3466 | 3 UTR | 0.0417 | 2 |
| <u>ARFGEF2</u>  | <u>NM_006420</u>    | 9  | 5991 | AACAUUCA   | 5983 | 3 UTR | 0.0132 | 1 |
| <u>ARFGEF2</u>  | <u>NM_006420</u>    | 9  | 5991 | AACAUUCA   | 5983 | 3 UTR | 0.0132 | 1 |
| <u>ARFIP1</u>   | <u>NM_001025595</u> | 8  | 2428 | AACAUUCA   | 2421 | 3 UTR | 0.0255 | 1 |
| <u>ARFIP1</u>   | <u>NM_001025595</u> | 8  | 2428 | AACAUUCA   | 2421 | 3 UTR | 0.0255 | 1 |
| <u>ARHGAP12</u> | <u>NM_018287</u>    | 8  | 3046 | AACAUUCA   | 3039 | 3 UTR | 0.0206 | 1 |
| <u>ARHGAP12</u> | <u>NM_018287</u>    | 8  | 3046 | AACAUUCA   | 3039 | 3 UTR | 0.0206 | 1 |
| <u>ARHGEF12</u> | <u>NM_015313</u>    | 9  | 6987 | AACAUUCA   | 6979 | 3 UTR | 0.0184 | 1 |
| <u>ARHGEF12</u> | <u>NM_015313</u>    | 9  | 6987 | AACAUUCA   | 6979 | 3 UTR | 0.0184 | 1 |
| <u>ARHGEF15</u> | <u>NM_173728</u>    | 8  | 2852 | ACAUUCA    | 2845 | 3 UTR | 0.0243 | 2 |
| <u>ARHGEF15</u> | <u>NM_173728</u>    | 8  | 2852 | ACAUUCA    | 2845 | 3 UTR | 0.0243 | 2 |
| <u>ARHGEF3</u>  | <u>NM_001128616</u> | 8  | 3993 | AACAUUCA   | 3986 | 3 UTR | 0.0280 | 1 |
| <u>ARHGEF3</u>  | <u>NM_001128616</u> | 8  | 3976 | AACAUUCA   | 3969 | 3 UTR | 0.0280 | 1 |
| <u>ARHGEF3</u>  | <u>NM_001128616</u> | 8  | 3993 | AACAUUCA   | 3986 | 3 UTR | 0.0280 | 1 |
| <u>ARHGEF3</u>  | <u>NM_001128616</u> | 8  | 3976 | AACAUUCA   | 3969 | 3 UTR | 0.0280 | 1 |
| <u>ARID2</u>    | <u>NM_152641</u>    | 8  | 6281 | AACAUUCA   | 6274 | 3 UTR | 0.0441 | 1 |
| <u>ARID2</u>    | <u>NM_152641</u>    | 8  | 6281 | AACAUUCA   | 6274 | 3 UTR | 0.0441 | 1 |
| <u>ARIH1</u>    | <u>NM_005744</u>    | 8  | 3881 | AACAUUCA   | 3874 | 3 UTR | 0.0488 | 1 |
| <u>ARIH1</u>    | <u>NM_005744</u>    | 8  | 3881 | AACAUUCA   | 3874 | 3 UTR | 0.0488 | 1 |
| <u>ARL1</u>     | <u>NM_001177</u>    | 8  | 890  | AACAUUCA   | 883  | 3 UTR | 0.0375 | 1 |
| <u>ARL1</u>     | <u>NM_001177</u>    | 8  | 890  | AACAUUCA   | 883  | 3 UTR | 0.0375 | 1 |
| <u>ARL11</u>    | <u>NM_138450</u>    | 8  | 2369 | AACAUUCA   | 2362 | 3 UTR | 0.0383 | 1 |
| <u>ARL11</u>    | <u>NM_138450</u>    | 8  | 2369 | AACAUUCA   | 2362 | 3 UTR | 0.0383 | 1 |
| <u>ARL5A</u>    | <u>NM_012097</u>    | 10 | 1205 | AACAUUCAAC | 1196 | 3 UTR | 0.0022 | 1 |
| <u>ARL5A</u>    | <u>NM_012097</u>    | 9  | 1204 | ACAUUCAAC  | 1196 | 3 UTR | 0.0088 | 2 |
| <u>ARL5A</u>    | <u>NM_012097</u>    | 10 | 1205 | AACAUUCAAC | 1196 | 3 UTR | 0.0022 | 1 |
| <u>ARL5A</u>    | <u>NM_012097</u>    | 9  | 1204 | ACAUUCAAC  | 1196 | 3 UTR | 0.0088 | 2 |
| <u>ARL6</u>     | <u>NM_032146</u>    | 7  | 1179 | AACAUUC    | 1173 | 3 UTR | 0.0297 | 1 |
| <u>ARL6</u>     | <u>NM_032146</u>    | 7  | 1179 | AACAUUC    | 1173 | 3 UTR | 0.0297 | 1 |
| <u>ARL6IP6</u>  | <u>NM_152522</u>    | 8  | 2703 | AACAUUCA   | 2696 | 3 UTR | 0.0214 | 1 |
| <u>ARL6IP6</u>  | <u>NM_152522</u>    | 8  | 2703 | AACAUUCA   | 2696 | 3 UTR | 0.0214 | 1 |
| <u>ARMC1</u>    | <u>NM_018120</u>    | 8  | 1799 | ACAUUCA    | 1792 | 3 UTR | 0.0237 | 2 |
| <u>ARMC1</u>    | <u>NM_018120</u>    | 8  | 1799 | ACAUUCA    | 1792 | 3 UTR | 0.0237 | 2 |
| <u>ARNT2</u>    | <u>NM_014862</u>    | 9  | 6455 | AACAUUCA   | 6447 | 3 UTR | 0.0161 | 1 |

|               |                     |   |      |           |      |       |        |   |
|---------------|---------------------|---|------|-----------|------|-------|--------|---|
| <u>ARNT2</u>  | <u>NM_014862</u>    | 9 | 6455 | AACAUUCA  | 6447 | 3 UTR | 0.0161 | 1 |
| <u>ARPC1A</u> | <u>NM_006409</u>    | 7 | 1591 | ACAUUCA   | 1585 | 3 UTR | 0.0217 | 2 |
| <u>ARPC1A</u> | <u>NM_006409</u>    | 7 | 1591 | ACAUUCA   | 1585 | 3 UTR | 0.0217 | 2 |
| <u>ARRB2</u>  | <u>NM_004313</u>    | 7 | 1649 | ACAUUCA   | 1643 | 3 UTR | 0.0288 | 2 |
| <u>ARRB2</u>  | <u>NM_004313</u>    | 7 | 1649 | ACAUUCA   | 1643 | 3 UTR | 0.0288 | 2 |
| <u>ARSJ</u>   | <u>NM_024590</u>    | 8 | 3648 | ACAUUCA   | 3641 | 3 UTR | 0.0301 | 2 |
| <u>ARSJ</u>   | <u>NM_024590</u>    | 8 | 3648 | ACAUUCA   | 3641 | 3 UTR | 0.0301 | 2 |
| <u>ARV1</u>   | <u>NM_022786</u>    | 7 | 1096 | AACAUUC   | 1090 | 3 UTR | 0.0363 | 1 |
| <u>ARV1</u>   | <u>NM_022786</u>    | 7 | 1096 | AACAUUC   | 1090 | 3 UTR | 0.0363 | 1 |
| <u>ASAH1</u>  | <u>NM_014435</u>    | 8 | 1630 | ACAUUCA   | 1623 | 3 UTR | 0.0112 | 2 |
| <u>ASAH1</u>  | <u>NM_014435</u>    | 8 | 1630 | ACAUUCA   | 1623 | 3 UTR | 0.0112 | 2 |
| <u>ASB3</u>   | <u>NM_016115</u>    | 7 | 1851 | AACAUUC   | 1845 | 3 UTR | 0.0314 | 1 |
| <u>ASB3</u>   | <u>NM_016115</u>    | 7 | 1851 | AACAUUC   | 1845 | 3 UTR | 0.0314 | 1 |
| <u>ASB5</u>   | <u>NM_080874</u>    | 9 | 1514 | ACAUUCAAC | 1506 | 3 UTR | 0.0073 | 2 |
| <u>ASB5</u>   | <u>NM_080874</u>    | 9 | 1514 | ACAUUCAAC | 1506 | 3 UTR | 0.0073 | 2 |
| <u>ASCC1</u>  | <u>NM_015947</u>    | 7 | 1886 | AACAUUC   | 1880 | 3 UTR | 0.0493 | 1 |
| <u>ASCC1</u>  | <u>NM_015947</u>    | 7 | 1886 | AACAUUC   | 1880 | 3 UTR | 0.0493 | 1 |
| <u>ASTN1</u>  | <u>NM_004319</u>    | 8 | 7033 | ACAUUCA   | 7026 | 3 UTR | 0.0481 | 2 |
| <u>ASTN1</u>  | <u>NM_004319</u>    | 8 | 7033 | ACAUUCA   | 7026 | 3 UTR | 0.0481 | 2 |
| <u>ATG10</u>  | <u>NM_001131028</u> | 8 | 1273 | AACAUUCA  | 1266 | 3 UTR | 0.0202 | 1 |
| <u>ATG10</u>  | <u>NM_001131028</u> | 8 | 1273 | AACAUUCA  | 1266 | 3 UTR | 0.0202 | 1 |
| <u>ATG5</u>   | <u>NM_004849</u>    | 9 | 2381 | AACAUUCA  | 2373 | 3 UTR | 0.0078 | 1 |
| <u>ATG5</u>   | <u>NM_004849</u>    | 8 | 2380 | ACAUUCA   | 2373 | 3 UTR | 0.0310 | 2 |
| <u>ATG5</u>   | <u>NM_004849</u>    | 9 | 2381 | AACAUUCA  | 2373 | 3 UTR | 0.0078 | 1 |
| <u>ATG5</u>   | <u>NM_004849</u>    | 8 | 2380 | ACAUUCA   | 2373 | 3 UTR | 0.0310 | 2 |
| <u>ATM</u>    | <u>NM_000051</u>    | 9 | 9686 | AACAUUCA  | 9678 | 3 UTR | 0.0136 | 1 |
| <u>ATM</u>    | <u>NM_000051</u>    | 9 | 9686 | AACAUUCA  | 9678 | 3 UTR | 0.0136 | 1 |
| <u>ATMIN</u>  | <u>NM_015251</u>    | 8 | 2585 | ACAUUCA   | 2578 | 3 UTR | 0.0356 | 2 |
| <u>ATMIN</u>  | <u>NM_015251</u>    | 8 | 2585 | ACAUUCA   | 2578 | 3 UTR | 0.0356 | 2 |
| <u>ATP11B</u> | <u>NM_014616</u>    | 9 | 7059 | AACAUUCA  | 7051 | 3 UTR | 0.0136 | 1 |
| <u>ATP11B</u> | <u>NM_014616</u>    | 9 | 7059 | AACAUUCA  | 7051 | 3 UTR | 0.0136 | 1 |
| <u>ATP11C</u> | <u>NM_173694</u>    | 8 | 4586 | AACAUUCA  | 4579 | 3 UTR | 0.0394 | 1 |
| <u>ATP11C</u> | <u>NM_173694</u>    | 8 | 4586 | AACAUUCA  | 4579 | 3 UTR | 0.0394 | 1 |
| <u>ATP1B1</u> | <u>NM_001677</u>    | 8 | 1907 | AACAUUCA  | 1900 | 3 UTR | 0.0178 | 1 |
| <u>ATP1B1</u> | <u>NM_001677</u>    | 8 | 1907 | AACAUUCA  | 1900 | 3 UTR | 0.0178 | 1 |
| <u>ATP2B1</u> | <u>NM_001001323</u> | 8 | 4014 | AACAUUCA  | 4007 | 3 UTR | 0.0482 | 1 |
| <u>ATP2B1</u> | <u>NM_001001323</u> | 8 | 4014 | AACAUUCA  | 4007 | 3 UTR | 0.0482 | 1 |
| <u>ATP2B3</u> | <u>NM_021949</u>    | 8 | 4713 | ACAUUCA   | 4706 | 3 UTR | 0.0439 | 2 |

|                 |                     |   |      |          |      |       |        |   |
|-----------------|---------------------|---|------|----------|------|-------|--------|---|
| <u>ATP2B3</u>   | <u>NM_021949</u>    | 8 | 4713 | ACAUUCA  | 4706 | 3 UTR | 0.0439 | 2 |
| <u>ATP6AP2</u>  | <u>NM_005765</u>    | 9 | 1160 | AACAUUCA | 1152 | 3 UTR | 0.0034 | 1 |
| <u>ATP6AP2</u>  | <u>NM_005765</u>    | 8 | 1159 | ACAUUCA  | 1152 | 3 UTR | 0.0135 | 2 |
| <u>ATP6AP2</u>  | <u>NM_005765</u>    | 9 | 1160 | AACAUUCA | 1152 | 3 UTR | 0.0034 | 1 |
| <u>ATP6AP2</u>  | <u>NM_005765</u>    | 8 | 1159 | ACAUUCA  | 1152 | 3 UTR | 0.0135 | 2 |
| <u>ATP6V1C2</u> | <u>NM_001039362</u> | 9 | 1583 | AACAUUCA | 1575 | 3 UTR | 0.0071 | 1 |
| <u>ATP6V1C2</u> | <u>NM_001039362</u> | 8 | 1582 | ACAUUCA  | 1575 | 3 UTR | 0.0279 | 2 |
| <u>ATP6V1C2</u> | <u>NM_001039362</u> | 9 | 1583 | AACAUUCA | 1575 | 3 UTR | 0.0071 | 1 |
| <u>ATP6V1C2</u> | <u>NM_001039362</u> | 8 | 1582 | ACAUUCA  | 1575 | 3 UTR | 0.0279 | 2 |
| <u>ATP8B1</u>   | <u>NM_005603</u>    | 8 | 5400 | AACAUUCA | 5393 | 3 UTR | 0.0310 | 1 |
| <u>ATP8B1</u>   | <u>NM_005603</u>    | 8 | 5400 | AACAUUCA | 5393 | 3 UTR | 0.0310 | 1 |
| <u>ATPAF1</u>   | <u>NM_022745</u>    | 8 | 2964 | AACAUUCA | 2957 | 3 UTR | 0.0454 | 1 |
| <u>ATPAF1</u>   | <u>NM_022745</u>    | 8 | 2964 | AACAUUCA | 2957 | 3 UTR | 0.0454 | 1 |
| <u>ATPAF2</u>   | <u>NM_145691</u>    | 7 | 1242 | ACAUUCA  | 1236 | 3 UTR | 0.0318 | 2 |
| <u>ATPAF2</u>   | <u>NM_145691</u>    | 7 | 1242 | ACAUUCA  | 1236 | 3 UTR | 0.0318 | 2 |
| <u>ATXN3</u>    | <u>NM_004993</u>    | 9 | 2543 | AACAUUCA | 2535 | 3 UTR | 0.0218 | 1 |
| <u>ATXN3</u>    | <u>NM_004993</u>    | 9 | 2543 | AACAUUCA | 2535 | 3 UTR | 0.0218 | 1 |
| <u>ATXN7</u>    | <u>NM_001128149</u> | 9 | 6474 | AACAUUCA | 6466 | 3 UTR | 0.0148 | 1 |
| <u>ATXN7</u>    | <u>NM_001128149</u> | 9 | 6474 | AACAUUCA | 6466 | 3 UTR | 0.0148 | 1 |
| <u>AUTS2</u>    | <u>NM_015570</u>    | 8 | 5139 | AACAUUCA | 5132 | 3 UTR | 0.0286 | 1 |
| <u>AUTS2</u>    | <u>NM_015570</u>    | 8 | 5139 | AACAUUCA | 5132 | 3 UTR | 0.0286 | 1 |
| <u>B3GALT1</u>  | <u>NM_020981</u>    | 8 | 1495 | AACAUUCA | 1488 | 3 UTR | 0.0127 | 1 |
| <u>B3GALT1</u>  | <u>NM_020981</u>    | 7 | 1494 | ACAUUCA  | 1488 | 3 UTR | 0.0497 | 2 |
| <u>B3GALT1</u>  | <u>NM_020981</u>    | 8 | 1495 | AACAUUCA | 1488 | 3 UTR | 0.0127 | 1 |
| <u>B3GALT1</u>  | <u>NM_020981</u>    | 7 | 1494 | ACAUUCA  | 1488 | 3 UTR | 0.0497 | 2 |
| <u>B3GALT5</u>  | <u>NM_033173</u>    | 8 | 3118 | ACAUUCA  | 3111 | 3 UTR | 0.0211 | 2 |
| <u>B3GALT5</u>  | <u>NM_033173</u>    | 8 | 3118 | ACAUUCA  | 3111 | 3 UTR | 0.0211 | 2 |
| <u>B4GALT6</u>  | <u>NM_004775</u>    | 9 | 2612 | AACAUUCA | 2604 | 3 UTR | 0.0128 | 1 |
| <u>B4GALT6</u>  | <u>NM_004775</u>    | 9 | 2612 | AACAUUCA | 2604 | 3 UTR | 0.0128 | 1 |
| <u>BAG2</u>     | <u>NM_004282</u>    | 7 | 1584 | ACAUUCA  | 1578 | 3 UTR | 0.0454 | 2 |
| <u>BAG2</u>     | <u>NM_004282</u>    | 7 | 1584 | ACAUUCA  | 1578 | 3 UTR | 0.0454 | 2 |
| <u>BAG4</u>     | <u>NM_004874</u>    | 7 | 1860 | ACAUUCA  | 1854 | 3 UTR | 0.0316 | 2 |
| <u>BAG4</u>     | <u>NM_004874</u>    | 7 | 1860 | ACAUUCA  | 1854 | 3 UTR | 0.0316 | 2 |
| <u>BAI3</u>     | <u>NM_001704</u>    | 8 | 5449 | AACAUUCA | 5442 | 3 UTR | 0.0096 | 1 |
| <u>BAI3</u>     | <u>NM_001704</u>    | 7 | 5448 | ACAUUCA  | 5442 | 3 UTR | 0.0379 | 2 |
| <u>BAI3</u>     | <u>NM_001704</u>    | 8 | 5449 | AACAUUCA | 5442 | 3 UTR | 0.0096 | 1 |
| <u>BAI3</u>     | <u>NM_001704</u>    | 7 | 5448 | ACAUUCA  | 5442 | 3 UTR | 0.0379 | 2 |
| <u>BANK1</u>    | <u>NM_017935</u>    | 9 | 3364 | AACAUUCA | 3356 | 3 UTR | 0.0031 | 1 |

|               |                  |    |       |            |       |       |        |   |
|---------------|------------------|----|-------|------------|-------|-------|--------|---|
| <u>BANK1</u>  | <u>NM_017935</u> | 8  | 3363  | ACAUUCA    | 3356  | 3 UTR | 0.0125 | 2 |
| <u>BANK1</u>  | <u>NM_017935</u> | 9  | 3364  | AACAUUCA   | 3356  | 3 UTR | 0.0031 | 1 |
| <u>BANK1</u>  | <u>NM_017935</u> | 8  | 3363  | ACAUUCA    | 3356  | 3 UTR | 0.0125 | 2 |
| <u>BBS9</u>   | <u>NM_198428</u> | 8  | 3698  | ACAUUCA    | 3691  | 3 UTR | 0.0128 | 2 |
| <u>BBS9</u>   | <u>NM_198428</u> | 8  | 3698  | ACAUUCA    | 3691  | 3 UTR | 0.0128 | 2 |
| <u>BCL11A</u> | <u>NM_022893</u> | 8  | 3774  | ACAUUCA    | 3767  | 3 UTR | 0.0478 | 2 |
| <u>BCL11A</u> | <u>NM_022893</u> | 8  | 3774  | ACAUUCA    | 3767  | 3 UTR | 0.0478 | 2 |
| <u>BCL6B</u>  | <u>NM_181844</u> | 9  | 2721  | AACAUUCA   | 2713  | 3 UTR | 0.0077 | 1 |
| <u>BCL6B</u>  | <u>NM_181844</u> | 8  | 2625  | AACAUUCA   | 2618  | 3 UTR | 0.0306 | 1 |
| <u>BCL6B</u>  | <u>NM_181844</u> | 8  | 2720  | ACAUUCA    | 2713  | 3 UTR | 0.0306 | 2 |
| <u>BCL6B</u>  | <u>NM_181844</u> | 9  | 2721  | AACAUUCA   | 2713  | 3 UTR | 0.0077 | 1 |
| <u>BCL6B</u>  | <u>NM_181844</u> | 8  | 2625  | AACAUUCA   | 2618  | 3 UTR | 0.0306 | 1 |
| <u>BCL6B</u>  | <u>NM_181844</u> | 8  | 2720  | ACAUUCA    | 2713  | 3 UTR | 0.0306 | 2 |
| <u>BIRC6</u>  | <u>NM_016252</u> | 8  | 15020 | AACAUUCA   | 15013 | 3 UTR | 0.0153 | 1 |
| <u>BIRC6</u>  | <u>NM_016252</u> | 8  | 15020 | AACAUUCA   | 15013 | 3 UTR | 0.0153 | 1 |
| <u>BMS1</u>   | <u>NM_014753</u> | 7  | 6231  | AACAUUC    | 6225  | 3 UTR | 0.0195 | 1 |
| <u>BMS1</u>   | <u>NM_014753</u> | 7  | 6231  | AACAUUC    | 6225  | 3 UTR | 0.0195 | 1 |
| <u>BPTF</u>   | <u>NM_182641</u> | 8  | 9710  | ACAUUCA    | 9703  | 3 UTR | 0.0314 | 2 |
| <u>BPTF</u>   | <u>NM_182641</u> | 8  | 9710  | ACAUUCA    | 9703  | 3 UTR | 0.0314 | 2 |
| <u>BRAP</u>   | <u>NM_006768</u> | 9  | 2517  | AACAUUCA   | 2509  | 3 UTR | 0.0079 | 1 |
| <u>BRAP</u>   | <u>NM_006768</u> | 8  | 2516  | ACAUUCA    | 2509  | 3 UTR | 0.0311 | 2 |
| <u>BRAP</u>   | <u>NM_006768</u> | 9  | 2517  | AACAUUCA   | 2509  | 3 UTR | 0.0079 | 1 |
| <u>BRAP</u>   | <u>NM_006768</u> | 8  | 2516  | ACAUUCA    | 2509  | 3 UTR | 0.0311 | 2 |
| <u>BRD1</u>   | <u>NM_014577</u> | 9  | 3955  | AACAUUCA   | 3947  | 3 UTR | 0.0036 | 1 |
| <u>BRD1</u>   | <u>NM_014577</u> | 8  | 3954  | ACAUUCA    | 3947  | 3 UTR | 0.0144 | 2 |
| <u>BRD1</u>   | <u>NM_014577</u> | 9  | 3955  | AACAUUCA   | 3947  | 3 UTR | 0.0036 | 1 |
| <u>BRD1</u>   | <u>NM_014577</u> | 8  | 3954  | ACAUUCA    | 3947  | 3 UTR | 0.0144 | 2 |
| <u>BTBD10</u> | <u>NM_032320</u> | 7  | 2320  | ACAUUCA    | 2314  | 3 UTR | 0.0497 | 2 |
| <u>BTBD10</u> | <u>NM_032320</u> | 7  | 2320  | ACAUUCA    | 2314  | 3 UTR | 0.0497 | 2 |
| <u>BTBD3</u>  | <u>NM_014962</u> | 10 | 4765  | AACAUUCAAC | 4756  | 3 UTR | 0.0028 | 1 |
| <u>BTBD3</u>  | <u>NM_014962</u> | 9  | 4764  | ACAUUCAAC  | 4756  | 3 UTR | 0.0111 | 2 |
| <u>BTBD3</u>  | <u>NM_014962</u> | 10 | 4765  | AACAUUCAAC | 4756  | 3 UTR | 0.0028 | 1 |
| <u>BTBD3</u>  | <u>NM_014962</u> | 9  | 4764  | ACAUUCAAC  | 4756  | 3 UTR | 0.0111 | 2 |
| <u>BTRC</u>   | <u>NM_033637</u> | 10 | 4123  | AACAUUCAAC | 4114  | 3 UTR | 0.0040 | 1 |
| <u>BTRC</u>   | <u>NM_033637</u> | 9  | 4122  | ACAUUCAAC  | 4114  | 3 UTR | 0.0160 | 2 |
| <u>BTRC</u>   | <u>NM_033637</u> | 10 | 4123  | AACAUUCAAC | 4114  | 3 UTR | 0.0040 | 1 |
| <u>BTRC</u>   | <u>NM_033637</u> | 9  | 4122  | ACAUUCAAC  | 4114  | 3 UTR | 0.0160 | 2 |
| <u>BUB3</u>   | <u>NM_004725</u> | 9  | 2763  | AACAUUCA   | 2755  | 3 UTR | 0.0059 | 1 |

|                 |                     |   |      |          |      |       |        |   |
|-----------------|---------------------|---|------|----------|------|-------|--------|---|
| <u>BUB3</u>     | <u>NM_004725</u>    | 8 | 2762 | ACAUUCA  | 2755 | 3 UTR | 0.0234 | 2 |
| <u>BUB3</u>     | <u>NM_004725</u>    | 9 | 2763 | AACAUUCA | 2755 | 3 UTR | 0.0059 | 1 |
| <u>BUB3</u>     | <u>NM_004725</u>    | 8 | 2762 | ACAUUCA  | 2755 | 3 UTR | 0.0234 | 2 |
| <u>C10orf30</u> | <u>NM_152751</u>    | 7 | 2387 | AACAUUC  | 2381 | 3 UTR | 0.0421 | 1 |
| <u>C10orf30</u> | <u>NM_152751</u>    | 7 | 2387 | AACAUUC  | 2381 | 3 UTR | 0.0421 | 1 |
| <u>C10orf4</u>  | <u>NM_145246</u>    | 8 | 2136 | ACAUUCA  | 2129 | 3 UTR | 0.0190 | 2 |
| <u>C10orf4</u>  | <u>NM_145246</u>    | 8 | 2136 | ACAUUCA  | 2129 | 3 UTR | 0.0190 | 2 |
| <u>C10orf67</u> | <u>NM_153714</u>    | 8 | 1093 | AACAUUCA | 1086 | 3 UTR | 0.0348 | 1 |
| <u>C10orf67</u> | <u>NM_153714</u>    | 8 | 1093 | AACAUUCA | 1086 | 3 UTR | 0.0348 | 1 |
| <u>C10orf68</u> | <u>NM_024688</u>    | 7 | 2552 | ACAUUCA  | 2546 | 3 UTR | 0.0223 | 2 |
| <u>C10orf68</u> | <u>NM_024688</u>    | 7 | 2552 | ACAUUCA  | 2546 | 3 UTR | 0.0223 | 2 |
| <u>C10orf78</u> | <u>NM_145247</u>    | 7 | 1383 | ACAUUCA  | 1377 | 3 UTR | 0.0416 | 2 |
| <u>C10orf78</u> | <u>NM_145247</u>    | 7 | 1383 | ACAUUCA  | 1377 | 3 UTR | 0.0416 | 2 |
| <u>C10orf83</u> | <u>NM_178832</u>    | 8 | 2308 | ACAUUCA  | 2301 | 3 UTR | 0.0260 | 2 |
| <u>C10orf83</u> | <u>NM_178832</u>    | 8 | 2308 | ACAUUCA  | 2301 | 3 UTR | 0.0260 | 2 |
| <u>C10orf88</u> | <u>NM_024942</u>    | 8 | 2957 | ACAUUCA  | 2950 | 3 UTR | 0.0232 | 2 |
| <u>C10orf88</u> | <u>NM_024942</u>    | 8 | 2957 | ACAUUCA  | 2950 | 3 UTR | 0.0232 | 2 |
| <u>C11orf30</u> | <u>NM_020193</u>    | 8 | 4439 | AACAUUCA | 4432 | 3 UTR | 0.0212 | 1 |
| <u>C11orf30</u> | <u>NM_020193</u>    | 8 | 4439 | AACAUUCA | 4432 | 3 UTR | 0.0212 | 1 |
| <u>C11orf47</u> | <u>NM_173589</u>    | 7 | 2819 | AACAUUC  | 2813 | 3 UTR | 0.0457 | 1 |
| <u>C11orf47</u> | <u>NM_173589</u>    | 7 | 2819 | AACAUUC  | 2813 | 3 UTR | 0.0457 | 1 |
| <u>C11orf53</u> | <u>NM_198498</u>    | 7 | 1045 | AACAUUC  | 1039 | 3 UTR | 0.0150 | 1 |
| <u>C11orf53</u> | <u>NM_198498</u>    | 7 | 1045 | AACAUUC  | 1039 | 3 UTR | 0.0150 | 1 |
| <u>C11orf56</u> | <u>NM_032127</u>    | 8 | 3438 | AACAUUCA | 3431 | 3 UTR | 0.0028 | 1 |
| <u>C11orf56</u> | <u>NM_032127</u>    | 7 | 3437 | ACAUUCA  | 3431 | 3 UTR | 0.0113 | 2 |
| <u>C11orf56</u> | <u>NM_032127</u>    | 8 | 3438 | AACAUUCA | 3431 | 3 UTR | 0.0028 | 1 |
| <u>C11orf56</u> | <u>NM_032127</u>    | 7 | 3437 | ACAUUCA  | 3431 | 3 UTR | 0.0113 | 2 |
| <u>C11orf61</u> | <u>NM_024631</u>    | 7 | 1551 | ACAUUCA  | 1545 | 3 UTR | 0.0421 | 2 |
| <u>C11orf61</u> | <u>NM_024631</u>    | 7 | 1551 | ACAUUCA  | 1545 | 3 UTR | 0.0421 | 2 |
| <u>C11orf75</u> | <u>NM_020179</u>    | 7 | 638  | ACAUUCA  | 632  | 3 UTR | 0.0325 | 2 |
| <u>C11orf75</u> | <u>NM_020179</u>    | 7 | 638  | ACAUUCA  | 632  | 3 UTR | 0.0325 | 2 |
| <u>C12orf12</u> | <u>NM_152638</u>    | 8 | 2890 | AACAUUCA | 2883 | 3 UTR | 0.0200 | 1 |
| <u>C12orf12</u> | <u>NM_152638</u>    | 8 | 2890 | AACAUUCA | 2883 | 3 UTR | 0.0200 | 1 |
| <u>C12orf35</u> | <u>NM_018169</u>    | 7 | 6081 | ACAUUCA  | 6075 | 3 UTR | 0.0353 | 2 |
| <u>C12orf35</u> | <u>NM_018169</u>    | 7 | 6081 | ACAUUCA  | 6075 | 3 UTR | 0.0353 | 2 |
| <u>C12orf56</u> | <u>NM_001099676</u> | 9 | 1529 | AACAUUCA | 1521 | 3 UTR | 0.0009 | 1 |
| <u>C12orf56</u> | <u>NM_001099676</u> | 8 | 1528 | ACAUUCA  | 1521 | 3 UTR | 0.0038 | 2 |
| <u>C12orf56</u> | <u>NM_001099676</u> | 9 | 1529 | AACAUUCA | 1521 | 3 UTR | 0.0009 | 1 |



|                  |                     |   |      |           |      |       |        |   |
|------------------|---------------------|---|------|-----------|------|-------|--------|---|
| <u>C12orf56</u>  | <u>NM_001099676</u> | 8 | 1528 | ACAUCAA   | 1521 | 3 UTR | 0.0038 | 2 |
| <u>C13orf23</u>  | <u>NM_025138</u>    | 8 | 4508 | AACAUUCA  | 4501 | 3 UTR | 0.0229 | 1 |
| <u>C13orf23</u>  | <u>NM_025138</u>    | 8 | 4508 | AACAUUCA  | 4501 | 3 UTR | 0.0229 | 1 |
| <u>C14orf126</u> | <u>NM_080664</u>    | 8 | 1982 | AACAUUCA  | 1975 | 3 UTR | 0.0317 | 1 |
| <u>C14orf126</u> | <u>NM_080664</u>    | 8 | 1982 | AACAUUCA  | 1975 | 3 UTR | 0.0317 | 1 |
| <u>C14orf135</u> | <u>NM_022495</u>    | 8 | 3846 | AACAUUCA  | 3839 | 3 UTR | 0.0093 | 1 |
| <u>C14orf135</u> | <u>NM_022495</u>    | 7 | 3845 | ACAUUCA   | 3839 | 3 UTR | 0.0367 | 2 |
| <u>C14orf135</u> | <u>NM_022495</u>    | 8 | 3846 | AACAUUCA  | 3839 | 3 UTR | 0.0093 | 1 |
| <u>C14orf135</u> | <u>NM_022495</u>    | 7 | 3845 | ACAUUCA   | 3839 | 3 UTR | 0.0367 | 2 |
| <u>C14orf142</u> | <u>NM_032490</u>    | 7 | 962  | ACAUUCA   | 956  | 3 UTR | 0.0483 | 2 |
| <u>C14orf142</u> | <u>NM_032490</u>    | 7 | 962  | ACAUUCA   | 956  | 3 UTR | 0.0483 | 2 |
| <u>C14orf169</u> | <u>NM_024644</u>    | 7 | 2456 | AACAUUC   | 2450 | 3 UTR | 0.0276 | 1 |
| <u>C14orf169</u> | <u>NM_024644</u>    | 7 | 2456 | AACAUUC   | 2450 | 3 UTR | 0.0276 | 1 |
| <u>C14orf178</u> | <u>NM_174943</u>    | 7 | 834  | ACAUUCA   | 828  | 3 UTR | 0.0039 | 2 |
| <u>C14orf178</u> | <u>NM_174943</u>    | 7 | 834  | ACAUUCA   | 828  | 3 UTR | 0.0039 | 2 |
| <u>C14orf28</u>  | <u>NM_001017923</u> | 8 | 1688 | ACAUCAA   | 1681 | 3 UTR | 0.0257 | 2 |
| <u>C14orf28</u>  | <u>NM_001017923</u> | 8 | 1688 | ACAUCAA   | 1681 | 3 UTR | 0.0257 | 2 |
| <u>C14orf43</u>  | <u>NM_194278</u>    | 9 | 8054 | AACAUUCAA | 8046 | 3 UTR | 0.0158 | 1 |
| <u>C14orf43</u>  | <u>NM_194278</u>    | 9 | 8054 | AACAUUCAA | 8046 | 3 UTR | 0.0158 | 1 |
| <u>C15orf2</u>   | <u>NM_018958</u>    | 9 | 6322 | AACAUUCAA | 6314 | 3 UTR | 0.0155 | 1 |
| <u>C15orf2</u>   | <u>NM_018958</u>    | 9 | 6322 | AACAUUCAA | 6314 | 3 UTR | 0.0155 | 1 |
| <u>C15orf26</u>  | <u>NM_173528</u>    | 8 | 1322 | ACAUCAA   | 1315 | 3 UTR | 0.0101 | 2 |
| <u>C15orf26</u>  | <u>NM_173528</u>    | 8 | 1322 | ACAUCAA   | 1315 | 3 UTR | 0.0101 | 2 |
| <u>C15orf48</u>  | <u>NM_032413</u>    | 8 | 735  | AACAUUCA  | 728  | 3 UTR | 0.0068 | 1 |
| <u>C15orf48</u>  | <u>NM_032413</u>    | 7 | 734  | ACAUUCA   | 728  | 3 UTR | 0.0268 | 2 |
| <u>C15orf48</u>  | <u>NM_032413</u>    | 8 | 735  | AACAUUCA  | 728  | 3 UTR | 0.0068 | 1 |
| <u>C15orf48</u>  | <u>NM_032413</u>    | 7 | 734  | ACAUUCA   | 728  | 3 UTR | 0.0268 | 2 |
| <u>C15orf56</u>  | <u>NM_001039905</u> | 8 | 2112 | AACAUUCA  | 2105 | 3 UTR | 0.0244 | 1 |
| <u>C15orf56</u>  | <u>NM_001039905</u> | 8 | 2112 | AACAUUCA  | 2105 | 3 UTR | 0.0244 | 1 |
| <u>C16orf71</u>  | <u>NM_139170</u>    | 7 | 2669 | AACAUUC   | 2663 | 3 UTR | 0.0413 | 1 |
| <u>C16orf71</u>  | <u>NM_139170</u>    | 7 | 2669 | AACAUUC   | 2663 | 3 UTR | 0.0413 | 1 |
| <u>C16orf75</u>  | <u>NM_152308</u>    | 9 | 1292 | AACAUUCAA | 1284 | 3 UTR | 0.0038 | 1 |
| <u>C16orf75</u>  | <u>NM_152308</u>    | 8 | 1291 | ACAUCAA   | 1284 | 3 UTR | 0.0151 | 2 |
| <u>C16orf75</u>  | <u>NM_152308</u>    | 9 | 1292 | AACAUUCAA | 1284 | 3 UTR | 0.0038 | 1 |
| <u>C16orf75</u>  | <u>NM_152308</u>    | 8 | 1291 | ACAUCAA   | 1284 | 3 UTR | 0.0151 | 2 |
| <u>C17orf39</u>  | <u>NM_024052</u>    | 9 | 2644 | AACAUUCAA | 2636 | 3 UTR | 0.0120 | 1 |
| <u>C17orf39</u>  | <u>NM_024052</u>    | 8 | 1211 | AACAUUCA  | 1204 | 3 UTR | 0.0471 | 1 |
| <u>C17orf39</u>  | <u>NM_024052</u>    | 8 | 2643 | ACAUCAA   | 2636 | 3 UTR | 0.0471 | 2 |

|                 |                     |   |      |          |      |       |        |   |
|-----------------|---------------------|---|------|----------|------|-------|--------|---|
| <u>C17orf39</u> | <u>NM_024052</u>    | 9 | 2644 | AACAUUCA | 2636 | 3 UTR | 0.0120 | 1 |
| <u>C17orf39</u> | <u>NM_024052</u>    | 8 | 1211 | AACAUUCA | 1204 | 3 UTR | 0.0471 | 1 |
| <u>C17orf39</u> | <u>NM_024052</u>    | 8 | 2643 | ACAUUCA  | 2636 | 3 UTR | 0.0471 | 2 |
| <u>C17orf51</u> | <u>NM_001113434</u> | 9 | 3482 | AACAUUCA | 3474 | 3 UTR | 0.0102 | 1 |
| <u>C17orf51</u> | <u>NM_001113434</u> | 8 | 3481 | ACAUUCA  | 3474 | 3 UTR | 0.0403 | 2 |
| <u>C17orf51</u> | <u>NM_001113434</u> | 9 | 3482 | AACAUUCA | 3474 | 3 UTR | 0.0102 | 1 |
| <u>C17orf51</u> | <u>NM_001113434</u> | 8 | 3481 | ACAUUCA  | 3474 | 3 UTR | 0.0403 | 2 |
| <u>C17orf59</u> | <u>NM_017622</u>    | 7 | 1814 | AACAUUC  | 1808 | 3 UTR | 0.0449 | 1 |
| <u>C17orf59</u> | <u>NM_017622</u>    | 7 | 1814 | AACAUUC  | 1808 | 3 UTR | 0.0449 | 1 |
| <u>C18orf37</u> | <u>NM_001098817</u> | 7 | 935  | AACAUUC  | 929  | 3 UTR | 0.0176 | 1 |
| <u>C18orf37</u> | <u>NM_001098817</u> | 7 | 935  | AACAUUC  | 929  | 3 UTR | 0.0176 | 1 |
| <u>C19orf2</u>  | <u>NM_003796</u>    | 7 | 2151 | ACAUUCA  | 2145 | 3 UTR | 0.0393 | 2 |
| <u>C19orf2</u>  | <u>NM_003796</u>    | 7 | 2151 | ACAUUCA  | 2145 | 3 UTR | 0.0393 | 2 |
| <u>C19orf25</u> | <u>NM_152482</u>    | 8 | 1482 | ACAUUCA  | 1475 | 3 UTR | 0.0278 | 2 |
| <u>C19orf25</u> | <u>NM_152482</u>    | 8 | 1482 | ACAUUCA  | 1475 | 3 UTR | 0.0278 | 2 |
| <u>C19orf42</u> | <u>NM_024104</u>    | 8 | 1261 | AACAUUCA | 1254 | 3 UTR | 0.0169 | 1 |
| <u>C19orf42</u> | <u>NM_024104</u>    | 8 | 1261 | AACAUUCA | 1254 | 3 UTR | 0.0169 | 1 |
| <u>C19orf59</u> | <u>NM_174918</u>    | 7 | 916  | ACAUUCA  | 910  | 3 UTR | 0.0440 | 2 |
| <u>C19orf59</u> | <u>NM_174918</u>    | 7 | 916  | ACAUUCA  | 910  | 3 UTR | 0.0440 | 2 |
| <u>C1orf109</u> | <u>NM_017850</u>    | 8 | 1678 | ACAUUCA  | 1671 | 3 UTR | 0.0237 | 2 |
| <u>C1orf109</u> | <u>NM_017850</u>    | 8 | 1678 | ACAUUCA  | 1671 | 3 UTR | 0.0237 | 2 |
| <u>C1orf113</u> | <u>NM_024676</u>    | 8 | 2452 | ACAUUCA  | 2445 | 3 UTR | 0.0209 | 2 |
| <u>C1orf113</u> | <u>NM_024676</u>    | 8 | 2452 | ACAUUCA  | 2445 | 3 UTR | 0.0209 | 2 |
| <u>C1orf131</u> | <u>NM_152379</u>    | 7 | 1130 | ACAUUCA  | 1124 | 3 UTR | 0.0340 | 2 |
| <u>C1orf131</u> | <u>NM_152379</u>    | 7 | 1130 | ACAUUCA  | 1124 | 3 UTR | 0.0340 | 2 |
| <u>C1orf161</u> | <u>NM_152367</u>    | 9 | 2894 | AACAUUCA | 2886 | 3 UTR | 0.0071 | 1 |
| <u>C1orf161</u> | <u>NM_152367</u>    | 8 | 2893 | ACAUUCA  | 2886 | 3 UTR | 0.0282 | 2 |
| <u>C1orf161</u> | <u>NM_152367</u>    | 9 | 2894 | AACAUUCA | 2886 | 3 UTR | 0.0071 | 1 |
| <u>C1orf161</u> | <u>NM_152367</u>    | 8 | 2893 | ACAUUCA  | 2886 | 3 UTR | 0.0282 | 2 |
| <u>C1orf2</u>   | <u>NM_006589</u>    | 7 | 3125 | AACAUUC  | 3119 | 3 UTR | 0.0357 | 1 |
| <u>C1orf2</u>   | <u>NM_006589</u>    | 7 | 3125 | AACAUUC  | 3119 | 3 UTR | 0.0357 | 1 |
| <u>C1orf27</u>  | <u>NM_017847</u>    | 8 | 2180 | AACAUUCA | 2173 | 3 UTR | 0.0348 | 1 |
| <u>C1orf27</u>  | <u>NM_017847</u>    | 8 | 2180 | AACAUUCA | 2173 | 3 UTR | 0.0348 | 1 |
| <u>C1orf43</u>  | <u>NM_001098616</u> | 7 | 1762 | AACAUUC  | 1756 | 3 UTR | 0.0452 | 1 |
| <u>C1orf43</u>  | <u>NM_001098616</u> | 7 | 1648 | ACAUUCA  | 1642 | 3 UTR | 0.0452 | 2 |
| <u>C1orf43</u>  | <u>NM_001098616</u> | 7 | 1762 | AACAUUC  | 1756 | 3 UTR | 0.0452 | 1 |
| <u>C1orf43</u>  | <u>NM_001098616</u> | 7 | 1648 | ACAUUCA  | 1642 | 3 UTR | 0.0452 | 2 |
| <u>C1orf50</u>  | <u>NM_024097</u>    | 7 | 797  | ACAUUCA  | 791  | 3 UTR | 0.0213 | 2 |

|                |                     |   |      |           |      |       |        |   |
|----------------|---------------------|---|------|-----------|------|-------|--------|---|
| <u>C1orf50</u> | <u>NM_024097</u>    | 7 | 797  | ACAUUCA   | 791  | 3 UTR | 0.0213 | 2 |
| <u>C1orf52</u> | <u>NM_198077</u>    | 9 | 1055 | AACAUUCA  | 1047 | 3 UTR | 0.0102 | 1 |
| <u>C1orf52</u> | <u>NM_198077</u>    | 8 | 1054 | ACAUUCA   | 1047 | 3 UTR | 0.0402 | 2 |
| <u>C1orf52</u> | <u>NM_198077</u>    | 9 | 1055 | AACAUUCA  | 1047 | 3 UTR | 0.0102 | 1 |
| <u>C1orf52</u> | <u>NM_198077</u>    | 8 | 1054 | ACAUUCA   | 1047 | 3 UTR | 0.0402 | 2 |
| <u>C1orf71</u> | <u>NM_152609</u>    | 8 | 3592 | ACAUUCA   | 3585 | 3 UTR | 0.0400 | 2 |
| <u>C1orf71</u> | <u>NM_152609</u>    | 8 | 3592 | ACAUUCA   | 3585 | 3 UTR | 0.0400 | 2 |
| <u>C1orf84</u> | <u>NM_001012961</u> | 8 | 878  | ACAUUCA   | 871  | 3 UTR | 0.0090 | 2 |
| <u>C1orf84</u> | <u>NM_001012961</u> | 8 | 878  | ACAUUCA   | 871  | 3 UTR | 0.0090 | 2 |
| <u>C1RL</u>    | <u>NM_016546</u>    | 8 | 1782 | ACAUUCA   | 1775 | 3 UTR | 0.0280 | 2 |
| <u>C1RL</u>    | <u>NM_016546</u>    | 8 | 1782 | ACAUUCA   | 1775 | 3 UTR | 0.0280 | 2 |
| <u>C2orf24</u> | <u>NM_018840</u>    | 7 | 1047 | AACAUUC   | 1041 | 3 UTR | 0.0308 | 1 |
| <u>C2orf24</u> | <u>NM_018840</u>    | 7 | 1047 | AACAUUC   | 1041 | 3 UTR | 0.0308 | 1 |
| <u>C2orf85</u> | <u>NM_178456</u>    | 7 | 643  | AACAUUC   | 637  | 3 UTR | 0.0205 | 1 |
| <u>C2orf85</u> | <u>NM_178456</u>    | 7 | 643  | AACAUUC   | 637  | 3 UTR | 0.0205 | 1 |
| <u>C2orf28</u> | <u>NM_014306</u>    | 7 | 2059 | AACAUUC   | 2053 | 3 UTR | 0.0260 | 1 |
| <u>C2orf28</u> | <u>NM_014306</u>    | 7 | 2059 | AACAUUC   | 2053 | 3 UTR | 0.0260 | 1 |
| <u>C2orf29</u> | <u>NM_017546</u>    | 8 | 2036 | AACAUUCA  | 2029 | 3 UTR | 0.0141 | 1 |
| <u>C2orf29</u> | <u>NM_017546</u>    | 8 | 2036 | AACAUUCA  | 2029 | 3 UTR | 0.0141 | 1 |
| <u>C2orf42</u> | <u>NM_017880</u>    | 7 | 2447 | AACAUUC   | 2441 | 3 UTR | 0.0293 | 1 |
| <u>C2orf42</u> | <u>NM_017880</u>    | 7 | 2447 | AACAUUC   | 2441 | 3 UTR | 0.0293 | 1 |
| <u>C2orf43</u> | <u>NM_021925</u>    | 8 | 1433 | AACAUUCA  | 1426 | 3 UTR | 0.0281 | 1 |
| <u>C2orf43</u> | <u>NM_021925</u>    | 8 | 1433 | AACAUUCA  | 1426 | 3 UTR | 0.0281 | 1 |
| <u>C2orf60</u> | <u>NM_001039693</u> | 9 | 2242 | AACAUUCA  | 2234 | 3 UTR | 0.0158 | 1 |
| <u>C2orf60</u> | <u>NM_001039693</u> | 9 | 2242 | AACAUUCA  | 2234 | 3 UTR | 0.0158 | 1 |
| <u>C3orf14</u> | <u>NM_020685</u>    | 8 | 559  | AACAUUCA  | 552  | 3 UTR | 0.0049 | 1 |
| <u>C3orf14</u> | <u>NM_020685</u>    | 7 | 558  | ACAUUCA   | 552  | 3 UTR | 0.0194 | 2 |
| <u>C3orf14</u> | <u>NM_020685</u>    | 8 | 559  | AACAUUCA  | 552  | 3 UTR | 0.0049 | 1 |
| <u>C3orf14</u> | <u>NM_020685</u>    | 7 | 558  | ACAUUCA   | 552  | 3 UTR | 0.0194 | 2 |
| <u>C3orf23</u> | <u>NM_173826</u>    | 8 | 2417 | AACAUUCA  | 2410 | 3 UTR | 0.0269 | 1 |
| <u>C3orf23</u> | <u>NM_173826</u>    | 9 | 2673 | ACAUUCAAC | 2665 | 3 UTR | 0.0068 | 2 |
| <u>C3orf23</u> | <u>NM_173826</u>    | 8 | 2417 | AACAUUCA  | 2410 | 3 UTR | 0.0269 | 1 |
| <u>C3orf23</u> | <u>NM_173826</u>    | 9 | 2673 | ACAUUCAAC | 2665 | 3 UTR | 0.0068 | 2 |
| <u>C3orf35</u> | <u>NM_178342</u>    | 8 | 1768 | AACAUUCA  | 1761 | 3 UTR | 0.0119 | 1 |
| <u>C3orf35</u> | <u>NM_178342</u>    | 7 | 1767 | ACAUUCA   | 1761 | 3 UTR | 0.0467 | 2 |
| <u>C3orf35</u> | <u>NM_178342</u>    | 8 | 1768 | AACAUUCA  | 1761 | 3 UTR | 0.0119 | 1 |
| <u>C3orf35</u> | <u>NM_178342</u>    | 7 | 1767 | ACAUUCA   | 1761 | 3 UTR | 0.0467 | 2 |
| <u>C3orf58</u> | <u>NM_173552</u>    | 8 | 2223 | ACAUUCA   | 2216 | 3 UTR | 0.0380 | 2 |

|                 |                     |   |      |           |      |       |        |   |
|-----------------|---------------------|---|------|-----------|------|-------|--------|---|
| <u>C3orf58</u>  | <u>NM_173552</u>    | 8 | 2223 | ACAUUCA   | 2216 | 3 UTR | 0.0380 | 2 |
| <u>C3orf62</u>  | <u>NM_198562</u>    | 8 | 1252 | ACAUUCA   | 1245 | 3 UTR | 0.0386 | 2 |
| <u>C3orf62</u>  | <u>NM_198562</u>    | 8 | 1252 | ACAUUCA   | 1245 | 3 UTR | 0.0386 | 2 |
| <u>C4orf15</u>  | <u>NM_024511</u>    | 9 | 4917 | AACAUUCA  | 4909 | 3 UTR | 0.0136 | 1 |
| <u>C4orf15</u>  | <u>NM_024511</u>    | 9 | 4917 | AACAUUCA  | 4909 | 3 UTR | 0.0136 | 1 |
| <u>C5orf13</u>  | <u>NM_004772</u>    | 8 | 1040 | AACAUUCA  | 1033 | 3 UTR | 0.0245 | 1 |
| <u>C5orf13</u>  | <u>NM_004772</u>    | 8 | 1040 | AACAUUCA  | 1033 | 3 UTR | 0.0245 | 1 |
| <u>C5orf29</u>  | <u>NM_152687</u>    | 8 | 2021 | AACAUUCA  | 2014 | 3 UTR | 0.0204 | 1 |
| <u>C5orf29</u>  | <u>NM_152687</u>    | 8 | 2021 | AACAUUCA  | 2014 | 3 UTR | 0.0204 | 1 |
| <u>C5orf5</u>   | <u>NM_016603</u>    | 8 | 5123 | AACAUUCA  | 5116 | 3 UTR | 0.0341 | 1 |
| <u>C5orf5</u>   | <u>NM_016603</u>    | 8 | 5123 | AACAUUCA  | 5116 | 3 UTR | 0.0341 | 1 |
| <u>C6orf115</u> | <u>NM_021243</u>    | 7 | 714  | AACAUUC   | 708  | 3 UTR | 0.0298 | 1 |
| <u>C6orf115</u> | <u>NM_021243</u>    | 7 | 714  | AACAUUC   | 708  | 3 UTR | 0.0298 | 1 |
| <u>C6orf117</u> | <u>NM_138409</u>    | 8 | 1097 | ACAUUCA   | 1090 | 3 UTR | 0.0214 | 2 |
| <u>C6orf117</u> | <u>NM_138409</u>    | 8 | 1097 | ACAUUCA   | 1090 | 3 UTR | 0.0214 | 2 |
| <u>C6orf128</u> | <u>NM_145316</u>    | 7 | 1293 | AACAUUC   | 1287 | 3 UTR | 0.0486 | 1 |
| <u>C6orf128</u> | <u>NM_145316</u>    | 7 | 765  | ACAUUCA   | 759  | 3 UTR | 0.0486 | 2 |
| <u>C6orf128</u> | <u>NM_145316</u>    | 7 | 1293 | AACAUUC   | 1287 | 3 UTR | 0.0486 | 1 |
| <u>C6orf128</u> | <u>NM_145316</u>    | 7 | 765  | ACAUUCA   | 759  | 3 UTR | 0.0486 | 2 |
| <u>C6orf151</u> | <u>NM_152551</u>    | 8 | 3998 | AACAUUCA  | 3991 | 3 UTR | 0.0461 | 1 |
| <u>C6orf151</u> | <u>NM_152551</u>    | 8 | 3998 | AACAUUCA  | 3991 | 3 UTR | 0.0461 | 1 |
| <u>C6orf190</u> | <u>NM_001010923</u> | 8 | 2982 | AACAUUCA  | 2975 | 3 UTR | 0.0270 | 1 |
| <u>C6orf190</u> | <u>NM_001010923</u> | 8 | 2982 | AACAUUCA  | 2975 | 3 UTR | 0.0270 | 1 |
| <u>C6orf199</u> | <u>NM_145025</u>    | 8 | 2440 | ACAUUCA   | 2433 | 3 UTR | 0.0184 | 2 |
| <u>C6orf199</u> | <u>NM_145025</u>    | 8 | 2440 | ACAUUCA   | 2433 | 3 UTR | 0.0184 | 2 |
| <u>C6orf223</u> | <u>NM_153246</u>    | 9 | 1550 | ACAUUCAAC | 1542 | 3 UTR | 0.0077 | 2 |
| <u>C6orf223</u> | <u>NM_153246</u>    | 9 | 1550 | ACAUUCAAC | 1542 | 3 UTR | 0.0077 | 2 |
| <u>C6orf97</u>  | <u>NM_025059</u>    | 8 | 4090 | ACAUUCA   | 4083 | 3 UTR | 0.0456 | 2 |
| <u>C6orf97</u>  | <u>NM_025059</u>    | 8 | 4090 | ACAUUCA   | 4083 | 3 UTR | 0.0456 | 2 |
| <u>C7orf24</u>  | <u>NM_024051</u>    | 7 | 924  | ACAUUCA   | 918  | 3 UTR | 0.0296 | 2 |
| <u>C7orf24</u>  | <u>NM_024051</u>    | 7 | 924  | ACAUUCA   | 918  | 3 UTR | 0.0296 | 2 |
| <u>C8orf32</u>  | <u>NM_018024</u>    | 8 | 1193 | ACAUUCA   | 1186 | 3 UTR | 0.0092 | 2 |
| <u>C8orf32</u>  | <u>NM_018024</u>    | 8 | 1193 | ACAUUCA   | 1186 | 3 UTR | 0.0092 | 2 |
| <u>C8orf53</u>  | <u>NM_032334</u>    | 8 | 1740 | AACAUUCA  | 1733 | 3 UTR | 0.0022 | 1 |
| <u>C8orf53</u>  | <u>NM_032334</u>    | 7 | 1739 | ACAUUCA   | 1733 | 3 UTR | 0.0089 | 2 |
| <u>C8orf53</u>  | <u>NM_032334</u>    | 8 | 1740 | AACAUUCA  | 1733 | 3 UTR | 0.0022 | 1 |
| <u>C8orf53</u>  | <u>NM_032334</u>    | 7 | 1739 | ACAUUCA   | 1733 | 3 UTR | 0.0089 | 2 |
| <u>C8orf59</u>  | <u>NM_001099670</u> | 9 | 593  | AACAUUCA  | 585  | 3 UTR | 0.0019 | 1 |

|                 |                     |   |      |           |      |       |        |   |
|-----------------|---------------------|---|------|-----------|------|-------|--------|---|
| <u>C8orf59</u>  | <u>NM_001099670</u> | 8 | 592  | ACAUUCA   | 585  | 3 UTR | 0.0077 | 2 |
| <u>C8orf59</u>  | <u>NM_001099670</u> | 9 | 593  | AACAUUCA  | 585  | 3 UTR | 0.0019 | 1 |
| <u>C8orf59</u>  | <u>NM_001099670</u> | 8 | 592  | ACAUUCA   | 585  | 3 UTR | 0.0077 | 2 |
| <u>C9orf126</u> | <u>NM_173690</u>    | 7 | 8150 | AACAUUC   | 8144 | 3 UTR | 0.0012 | 1 |
| <u>C9orf126</u> | <u>NM_173690</u>    | 7 | 9927 | ACAUUCA   | 9921 | 3 UTR | 0.0012 | 2 |
| <u>C9orf126</u> | <u>NM_173690</u>    | 7 | 8737 | ACAUUCA   | 8731 | 3 UTR | 0.0012 | 2 |
| <u>C9orf126</u> | <u>NM_173690</u>    | 7 | 8150 | AACAUUC   | 8144 | 3 UTR | 0.0012 | 1 |
| <u>C9orf126</u> | <u>NM_173690</u>    | 7 | 9927 | ACAUUCA   | 9921 | 3 UTR | 0.0012 | 2 |
| <u>C9orf126</u> | <u>NM_173690</u>    | 7 | 8737 | ACAUUCA   | 8731 | 3 UTR | 0.0012 | 2 |
| <u>C9orf167</u> | <u>NM_017723</u>    | 8 | 3438 | AACAUUCA  | 3431 | 3 UTR | 0.0401 | 1 |
| <u>C9orf167</u> | <u>NM_017723</u>    | 8 | 3438 | AACAUUCA  | 3431 | 3 UTR | 0.0401 | 1 |
| <u>C9orf23</u>  | <u>NM_148179</u>    | 7 | 811  | ACAUUCA   | 805  | 3 UTR | 0.0198 | 2 |
| <u>C9orf23</u>  | <u>NM_148179</u>    | 7 | 811  | ACAUUCA   | 805  | 3 UTR | 0.0198 | 2 |
| <u>C9orf68</u>  | <u>NM_001039395</u> | 8 | 2373 | AACAUUCA  | 2366 | 3 UTR | 0.0375 | 1 |
| <u>C9orf68</u>  | <u>NM_001039395</u> | 9 | 1968 | ACAUUCAAC | 1960 | 3 UTR | 0.0095 | 2 |
| <u>C9orf68</u>  | <u>NM_001039395</u> | 8 | 2373 | AACAUUCA  | 2366 | 3 UTR | 0.0375 | 1 |
| <u>C9orf68</u>  | <u>NM_001039395</u> | 9 | 1968 | ACAUUCAAC | 1960 | 3 UTR | 0.0095 | 2 |
| <u>CA13</u>     | <u>NM_198584</u>    | 8 | 3012 | ACAUUCA   | 3005 | 3 UTR | 0.0407 | 2 |
| <u>CA13</u>     | <u>NM_198584</u>    | 8 | 3012 | ACAUUCA   | 3005 | 3 UTR | 0.0407 | 2 |
| <u>CABC1</u>    | <u>NM_020247</u>    | 8 | 2689 | AACAUUCA  | 2682 | 3 UTR | 0.0124 | 1 |
| <u>CABC1</u>    | <u>NM_020247</u>    | 8 | 2418 | AACAUUCA  | 2411 | 3 UTR | 0.0124 | 1 |
| <u>CABC1</u>    | <u>NM_020247</u>    | 7 | 2688 | ACAUUCA   | 2682 | 3 UTR | 0.0486 | 2 |
| <u>CABC1</u>    | <u>NM_020247</u>    | 7 | 2417 | ACAUUCA   | 2411 | 3 UTR | 0.0486 | 2 |
| <u>CABC1</u>    | <u>NM_020247</u>    | 8 | 2689 | AACAUUCA  | 2682 | 3 UTR | 0.0124 | 1 |
| <u>CABC1</u>    | <u>NM_020247</u>    | 8 | 2418 | AACAUUCA  | 2411 | 3 UTR | 0.0124 | 1 |
| <u>CABC1</u>    | <u>NM_020247</u>    | 7 | 2688 | ACAUUCA   | 2682 | 3 UTR | 0.0486 | 2 |
| <u>CABC1</u>    | <u>NM_020247</u>    | 7 | 2417 | ACAUUCA   | 2411 | 3 UTR | 0.0486 | 2 |
| <u>CACNA2D4</u> | <u>NM_172364</u>    | 8 | 5265 | ACAUUCA   | 5258 | 3 UTR | 0.0256 | 2 |
| <u>CACNA2D4</u> | <u>NM_172364</u>    | 8 | 5265 | ACAUUCA   | 5258 | 3 UTR | 0.0256 | 2 |
| <u>CACNB2</u>   | <u>NM_000724</u>    | 8 | 3254 | AACAUUCA  | 3247 | 3 UTR | 0.0306 | 1 |
| <u>CACNB2</u>   | <u>NM_000724</u>    | 8 | 3254 | AACAUUCA  | 3247 | 3 UTR | 0.0306 | 1 |
| <u>CALB1</u>    | <u>NM_004929</u>    | 9 | 1939 | AACAUUCA  | 1931 | 3 UTR | 0.0059 | 1 |
| <u>CALB1</u>    | <u>NM_004929</u>    | 8 | 2305 | ACAUUCA   | 2298 | 3 UTR | 0.0236 | 2 |
| <u>CALB1</u>    | <u>NM_004929</u>    | 8 | 1938 | ACAUUCA   | 1931 | 3 UTR | 0.0236 | 2 |
| <u>CALB1</u>    | <u>NM_004929</u>    | 9 | 1939 | AACAUUCA  | 1931 | 3 UTR | 0.0059 | 1 |
| <u>CALB1</u>    | <u>NM_004929</u>    | 8 | 2305 | ACAUUCA   | 2298 | 3 UTR | 0.0236 | 2 |
| <u>CALB1</u>    | <u>NM_004929</u>    | 8 | 1938 | ACAUUCA   | 1931 | 3 UTR | 0.0236 | 2 |
| <u>CALCR</u>    | <u>NM_001742</u>    | 9 | 2327 | ACAUUCAAC | 2319 | 3 UTR | 0.0071 | 2 |

|                  |                     |   |      |           |      |       |        |   |
|------------------|---------------------|---|------|-----------|------|-------|--------|---|
| <u>CALCR</u>     | <u>NM_001742</u>    | 8 | 1605 | ACAUUCA   | 1598 | 3 UTR | 0.0281 | 2 |
| <u>CALCR</u>     | <u>NM_001742</u>    | 9 | 2327 | ACAUUCAAC | 2319 | 3 UTR | 0.0071 | 2 |
| <u>CALCR</u>     | <u>NM_001742</u>    | 8 | 1605 | ACAUUCA   | 1598 | 3 UTR | 0.0281 | 2 |
| <u>CALCRL</u>    | <u>NM_005795</u>    | 8 | 2041 | ACAUUCA   | 2034 | 3 UTR | 0.0458 | 2 |
| <u>CALCRL</u>    | <u>NM_005795</u>    | 8 | 2041 | ACAUUCA   | 2034 | 3 UTR | 0.0458 | 2 |
| <u>CAMK2G</u>    | <u>NM_172171</u>    | 8 | 3733 | AACAUUCA  | 3726 | 3 UTR | 0.0305 | 1 |
| <u>CAMK2G</u>    | <u>NM_172171</u>    | 8 | 3733 | AACAUUCA  | 3726 | 3 UTR | 0.0305 | 1 |
| <u>CAMKK1</u>    | <u>NM_032294</u>    | 8 | 3455 | ACAUUCA   | 3448 | 3 UTR | 0.0288 | 2 |
| <u>CAMKK1</u>    | <u>NM_032294</u>    | 8 | 3455 | ACAUUCA   | 3448 | 3 UTR | 0.0288 | 2 |
| <u>CAMSAP1</u>   | <u>NM_015447</u>    | 8 | 5301 | ACAUUCA   | 5294 | 3 UTR | 0.0424 | 2 |
| <u>CAMSAP1</u>   | <u>NM_015447</u>    | 8 | 5301 | ACAUUCA   | 5294 | 3 UTR | 0.0424 | 2 |
| <u>CAMSAP1L1</u> | <u>NM_203459</u>    | 8 | 6738 | ACAUUCA   | 6731 | 3 UTR | 0.0397 | 2 |
| <u>CAMSAP1L1</u> | <u>NM_203459</u>    | 8 | 6738 | ACAUUCA   | 6731 | 3 UTR | 0.0397 | 2 |
| <u>CAMTA2</u>    | <u>NM_015099</u>    | 7 | 4075 | ACAUUCA   | 4069 | 3 UTR | 0.0452 | 2 |
| <u>CAMTA2</u>    | <u>NM_015099</u>    | 7 | 4075 | ACAUUCA   | 4069 | 3 UTR | 0.0452 | 2 |
| <u>CAND1</u>     | <u>NM_018448</u>    | 9 | 5664 | AACAUUCA  | 5656 | 3 UTR | 0.0069 | 1 |
| <u>CAND1</u>     | <u>NM_018448</u>    | 8 | 5663 | ACAUUCA   | 5656 | 3 UTR | 0.0275 | 2 |
| <u>CAND1</u>     | <u>NM_018448</u>    | 9 | 5664 | AACAUUCA  | 5656 | 3 UTR | 0.0069 | 1 |
| <u>CAND1</u>     | <u>NM_018448</u>    | 8 | 5663 | ACAUUCA   | 5656 | 3 UTR | 0.0275 | 2 |
| <u>CAPRIN1</u>   | <u>NM_005898</u>    | 8 | 5529 | AACAUUCA  | 5522 | 3 UTR | 0.0483 | 1 |
| <u>CAPRIN1</u>   | <u>NM_005898</u>    | 8 | 5529 | AACAUUCA  | 5522 | 3 UTR | 0.0483 | 1 |
| <u>CAPRIN2</u>   | <u>NM_001002259</u> | 7 | 4370 | ACAUUCA   | 4364 | 3 UTR | 0.0221 | 2 |
| <u>CAPRIN2</u>   | <u>NM_001002259</u> | 7 | 4370 | ACAUUCA   | 4364 | 3 UTR | 0.0221 | 2 |
| <u>CAPZA2</u>    | <u>NM_006136</u>    | 8 | 2054 | AACAUUCA  | 2047 | 3 UTR | 0.0213 | 1 |
| <u>CAPZA2</u>    | <u>NM_006136</u>    | 8 | 2054 | AACAUUCA  | 2047 | 3 UTR | 0.0213 | 1 |
| <u>CARD11</u>    | <u>NM_032415</u>    | 9 | 4194 | ACAUUCAAC | 4186 | 3 UTR | 0.0019 | 2 |
| <u>CARD11</u>    | <u>NM_032415</u>    | 9 | 4194 | ACAUUCAAC | 4186 | 3 UTR | 0.0019 | 2 |
| <u>CARD14</u>    | <u>NM_024110</u>    | 7 | 3475 | AACAUUC   | 3469 | 3 UTR | 0.0422 | 1 |
| <u>CARD14</u>    | <u>NM_024110</u>    | 7 | 3475 | AACAUUC   | 3469 | 3 UTR | 0.0422 | 1 |
| <u>CARM1</u>     | <u>NM_199141</u>    | 8 | 2577 | ACAUUCA   | 2570 | 3 UTR | 0.0154 | 2 |
| <u>CARM1</u>     | <u>NM_199141</u>    | 8 | 2577 | ACAUUCA   | 2570 | 3 UTR | 0.0154 | 2 |
| <u>CASP1</u>     | <u>NM_033292</u>    | 7 | 1254 | ACAUUCA   | 1248 | 3 UTR | 0.0080 | 2 |
| <u>CASP1</u>     | <u>NM_033292</u>    | 7 | 1254 | ACAUUCA   | 1248 | 3 UTR | 0.0080 | 2 |
| <u>CBLB</u>      | <u>NM_170662</u>    | 7 | 3920 | ACAUUCA   | 3914 | 3 UTR | 0.0421 | 2 |
| <u>CBLB</u>      | <u>NM_170662</u>    | 7 | 3920 | ACAUUCA   | 3914 | 3 UTR | 0.0421 | 2 |
| <u>CBLL1</u>     | <u>NM_024814</u>    | 8 | 4026 | AACAUUCA  | 4019 | 3 UTR | 0.0368 | 1 |
| <u>CBLL1</u>     | <u>NM_024814</u>    | 9 | 3869 | ACAUUCAAC | 3861 | 3 UTR | 0.0093 | 2 |
| <u>CBLL1</u>     | <u>NM_024814</u>    | 8 | 4026 | AACAUUCA  | 4019 | 3 UTR | 0.0368 | 1 |

|                 |                     |    |      |            |      |       |        |   |
|-----------------|---------------------|----|------|------------|------|-------|--------|---|
| <u>CBLL1</u>    | <u>NM_024814</u>    | 9  | 3869 | ACAUUCAAC  | 3861 | 3 UTR | 0.0093 | 2 |
| <u>CBX4</u>     | <u>NM_003655</u>    | 8  | 2620 | ACAUUCAA   | 2613 | 3 UTR | 0.0123 | 2 |
| <u>CBX4</u>     | <u>NM_003655</u>    | 8  | 2620 | ACAUUCAA   | 2613 | 3 UTR | 0.0123 | 2 |
| <u>CBX7</u>     | <u>NM_175709</u>    | 10 | 2879 | AACAUUCAAC | 2870 | 3 UTR | 0.0030 | 1 |
| <u>CBX7</u>     | <u>NM_175709</u>    | 9  | 2878 | ACAUUCAAC  | 2870 | 3 UTR | 0.0118 | 2 |
| <u>CBX7</u>     | <u>NM_175709</u>    | 10 | 2879 | AACAUUCAAC | 2870 | 3 UTR | 0.0030 | 1 |
| <u>CBX7</u>     | <u>NM_175709</u>    | 9  | 2878 | ACAUUCAAC  | 2870 | 3 UTR | 0.0118 | 2 |
| <u>CC2D2B</u>   | <u>NM_001001732</u> | 7  | 1687 | AACAUUC    | 1681 | 3 UTR | 0.0452 | 1 |
| <u>CC2D2B</u>   | <u>NM_001001732</u> | 7  | 1687 | AACAUUC    | 1681 | 3 UTR | 0.0452 | 1 |
| <u>CCAR1</u>    | <u>NM_018237</u>    | 7  | 3642 | AACAUUC    | 3636 | 3 UTR | 0.0173 | 1 |
| <u>CCAR1</u>    | <u>NM_018237</u>    | 7  | 3717 | ACAUUCA    | 3711 | 3 UTR | 0.0173 | 2 |
| <u>CCAR1</u>    | <u>NM_018237</u>    | 7  | 3642 | AACAUUC    | 3636 | 3 UTR | 0.0173 | 1 |
| <u>CCAR1</u>    | <u>NM_018237</u>    | 7  | 3717 | ACAUUCA    | 3711 | 3 UTR | 0.0173 | 2 |
| <u>CCBL1</u>    | <u>NM_001122671</u> | 7  | 1589 | AACAUUC    | 1583 | 3 UTR | 0.0293 | 1 |
| <u>CCBL1</u>    | <u>NM_001122671</u> | 7  | 1589 | AACAUUC    | 1583 | 3 UTR | 0.0293 | 1 |
| <u>CCDC100</u>  | <u>NM_153223</u>    | 8  | 3446 | ACAUUCAA   | 3439 | 3 UTR | 0.0246 | 2 |
| <u>CCDC100</u>  | <u>NM_153223</u>    | 8  | 3446 | ACAUUCAA   | 3439 | 3 UTR | 0.0246 | 2 |
| <u>CCDC102A</u> | <u>NM_033212</u>    | 7  | 2423 | ACAUUCA    | 2417 | 3 UTR | 0.0357 | 2 |
| <u>CCDC102A</u> | <u>NM_033212</u>    | 7  | 2423 | ACAUUCA    | 2417 | 3 UTR | 0.0357 | 2 |
| <u>CCDC112</u>  | <u>NM_152549</u>    | 7  | 1889 | AACAUUC    | 1883 | 3 UTR | 0.0417 | 1 |
| <u>CCDC112</u>  | <u>NM_152549</u>    | 7  | 1889 | AACAUUC    | 1883 | 3 UTR | 0.0417 | 1 |
| <u>CCDC125</u>  | <u>NM_176816</u>    | 8  | 2589 | AACAUUCA   | 2582 | 3 UTR | 0.0307 | 1 |
| <u>CCDC125</u>  | <u>NM_176816</u>    | 8  | 2589 | AACAUUCA   | 2582 | 3 UTR | 0.0307 | 1 |
| <u>CCDC126</u>  | <u>NM_138771</u>    | 8  | 1678 | AACAUUCA   | 1671 | 3 UTR | 0.0240 | 1 |
| <u>CCDC126</u>  | <u>NM_138771</u>    | 8  | 1678 | AACAUUCA   | 1671 | 3 UTR | 0.0240 | 1 |
| <u>CCDC17</u>   | <u>NM_001114938</u> | 7  | 1935 | ACAUUCA    | 1929 | 3 UTR | 0.0158 | 2 |
| <u>CCDC17</u>   | <u>NM_001114938</u> | 7  | 1935 | ACAUUCA    | 1929 | 3 UTR | 0.0158 | 2 |
| <u>CCDC36</u>   | <u>NM_178173</u>    | 7  | 2657 | AACAUUC    | 2651 | 3 UTR | 0.0489 | 1 |
| <u>CCDC36</u>   | <u>NM_178173</u>    | 7  | 2657 | AACAUUC    | 2651 | 3 UTR | 0.0489 | 1 |
| <u>CCDC41</u>   | <u>NM_016122</u>    | 8  | 2806 | ACAUUCAA   | 2799 | 3 UTR | 0.0083 | 2 |
| <u>CCDC41</u>   | <u>NM_016122</u>    | 8  | 2806 | ACAUUCAA   | 2799 | 3 UTR | 0.0083 | 2 |
| <u>CCDC42</u>   | <u>NM_144681</u>    | 8  | 1351 | AACAUUCA   | 1344 | 3 UTR | 0.0030 | 1 |
| <u>CCDC42</u>   | <u>NM_144681</u>    | 7  | 1350 | ACAUUCA    | 1344 | 3 UTR | 0.0119 | 2 |
| <u>CCDC42</u>   | <u>NM_144681</u>    | 8  | 1351 | AACAUUCA   | 1344 | 3 UTR | 0.0030 | 1 |
| <u>CCDC42</u>   | <u>NM_144681</u>    | 7  | 1350 | ACAUUCA    | 1344 | 3 UTR | 0.0119 | 2 |
| <u>CCDC51</u>   | <u>NM_024661</u>    | 7  | 1314 | ACAUUCA    | 1308 | 3 UTR | 0.0144 | 2 |
| <u>CCDC51</u>   | <u>NM_024661</u>    | 7  | 1314 | ACAUUCA    | 1308 | 3 UTR | 0.0144 | 2 |
| <u>CCDC60</u>   | <u>NM_178499</u>    | 8  | 2447 | AACAUUCA   | 2440 | 3 UTR | 0.0053 | 1 |

|                |                     |   |      |          |      |       |        |   |
|----------------|---------------------|---|------|----------|------|-------|--------|---|
| <u>CCDC60</u>  | <u>NM_178499</u>    | 7 | 2446 | ACAUUCA  | 2440 | 3 UTR | 0.0210 | 2 |
| <u>CCDC60</u>  | <u>NM_178499</u>    | 8 | 2447 | AACAUUCA | 2440 | 3 UTR | 0.0053 | 1 |
| <u>CCDC60</u>  | <u>NM_178499</u>    | 7 | 2446 | ACAUUCA  | 2440 | 3 UTR | 0.0210 | 2 |
| <u>CCDC75</u>  | <u>NM_174931</u>    | 8 | 1078 | AACAUUCA | 1071 | 3 UTR | 0.0051 | 1 |
| <u>CCDC75</u>  | <u>NM_174931</u>    | 7 | 1077 | ACAUUCA  | 1071 | 3 UTR | 0.0201 | 2 |
| <u>CCDC75</u>  | <u>NM_174931</u>    | 8 | 1078 | AACAUUCA | 1071 | 3 UTR | 0.0051 | 1 |
| <u>CCDC75</u>  | <u>NM_174931</u>    | 7 | 1077 | ACAUUCA  | 1071 | 3 UTR | 0.0201 | 2 |
| <u>CCDC88C</u> | <u>NM_001080414</u> | 9 | 7390 | AACAUUCA | 7382 | 3 UTR | 0.0051 | 1 |
| <u>CCDC88C</u> | <u>NM_001080414</u> | 8 | 7389 | ACAUUCA  | 7382 | 3 UTR | 0.0202 | 2 |
| <u>CCDC88C</u> | <u>NM_001080414</u> | 9 | 7390 | AACAUUCA | 7382 | 3 UTR | 0.0051 | 1 |
| <u>CCDC88C</u> | <u>NM_001080414</u> | 8 | 7389 | ACAUUCA  | 7382 | 3 UTR | 0.0202 | 2 |
| <u>CCDC92</u>  | <u>NM_025140</u>    | 7 | 1721 | ACAUUCA  | 1715 | 3 UTR | 0.0401 | 2 |
| <u>CCDC92</u>  | <u>NM_025140</u>    | 7 | 1721 | ACAUUCA  | 1715 | 3 UTR | 0.0401 | 2 |
| <u>CCL13</u>   | <u>NM_005408</u>    | 7 | 758  | ACAUUCA  | 752  | 3 UTR | 0.0294 | 2 |
| <u>CCL13</u>   | <u>NM_005408</u>    | 7 | 758  | ACAUUCA  | 752  | 3 UTR | 0.0294 | 2 |
| <u>CCL22</u>   | <u>NM_002990</u>    | 8 | 666  | AACAUUCA | 659  | 3 UTR | 0.0393 | 1 |
| <u>CCL22</u>   | <u>NM_002990</u>    | 8 | 666  | AACAUUCA | 659  | 3 UTR | 0.0393 | 1 |
| <u>CCL8</u>    | <u>NM_005623</u>    | 7 | 966  | ACAUUCA  | 960  | 3 UTR | 0.0357 | 2 |
| <u>CCL8</u>    | <u>NM_005623</u>    | 7 | 966  | ACAUUCA  | 960  | 3 UTR | 0.0357 | 2 |
| <u>CCNK</u>    | <u>NM_001099402</u> | 7 | 2525 | ACAUUCA  | 2519 | 3 UTR | 0.0445 | 2 |
| <u>CCNK</u>    | <u>NM_001099402</u> | 7 | 2525 | ACAUUCA  | 2519 | 3 UTR | 0.0445 | 2 |
| <u>CCNL2</u>   | <u>NM_001039577</u> | 9 | 1316 | ACAUUCA  | 1308 | 3 UTR | 0.0173 | 2 |
| <u>CCNL2</u>   | <u>NM_001039577</u> | 9 | 1316 | ACAUUCA  | 1308 | 3 UTR | 0.0173 | 2 |
| <u>CCR3</u>    | <u>NM_001837</u>    | 8 | 1783 | AACAUUCA | 1776 | 3 UTR | 0.0068 | 1 |
| <u>CCR3</u>    | <u>NM_001837</u>    | 7 | 1782 | ACAUUCA  | 1776 | 3 UTR | 0.0268 | 2 |
| <u>CCR3</u>    | <u>NM_001837</u>    | 8 | 1783 | AACAUUCA | 1776 | 3 UTR | 0.0068 | 1 |
| <u>CCR3</u>    | <u>NM_001837</u>    | 7 | 1782 | ACAUUCA  | 1776 | 3 UTR | 0.0268 | 2 |
| <u>CCRN4L</u>  | <u>NM_012118</u>    | 7 | 1795 | AACAUUC  | 1789 | 3 UTR | 0.0290 | 1 |
| <u>CCRN4L</u>  | <u>NM_012118</u>    | 7 | 1795 | AACAUUC  | 1789 | 3 UTR | 0.0290 | 1 |
| <u>CCT8L2</u>  | <u>NM_014406</u>    | 8 | 1995 | AACAUUCA | 1988 | 3 UTR | 0.0020 | 1 |
| <u>CCT8L2</u>  | <u>NM_014406</u>    | 7 | 1994 | ACAUUCA  | 1988 | 3 UTR | 0.0080 | 2 |
| <u>CCT8L2</u>  | <u>NM_014406</u>    | 8 | 1995 | AACAUUCA | 1988 | 3 UTR | 0.0020 | 1 |
| <u>CCT8L2</u>  | <u>NM_014406</u>    | 7 | 1994 | ACAUUCA  | 1988 | 3 UTR | 0.0080 | 2 |
| <u>CD1E</u>    | <u>NM_030893</u>    | 7 | 2015 | ACAUUCA  | 2009 | 3 UTR | 0.0393 | 2 |
| <u>CD1E</u>    | <u>NM_030893</u>    | 7 | 2015 | ACAUUCA  | 2009 | 3 UTR | 0.0393 | 2 |
| <u>CD300LB</u> | <u>NM_174892</u>    | 8 | 1663 | ACAUUCA  | 1656 | 3 UTR | 0.0241 | 2 |
| <u>CD300LB</u> | <u>NM_174892</u>    | 8 | 1663 | ACAUUCA  | 1656 | 3 UTR | 0.0241 | 2 |
| <u>CD302</u>   | <u>NM_014880</u>    | 8 | 3705 | AACAUUCA | 3698 | 3 UTR | 0.0482 | 1 |



|                   |                     |   |       |          |       |       |        |   |
|-------------------|---------------------|---|-------|----------|-------|-------|--------|---|
| <u>CD302</u>      | <u>NM_014880</u>    | 8 | 1335  | AACAUUCA | 1328  | 3 UTR | 0.0482 | 1 |
| <u>CD302</u>      | <u>NM_014880</u>    | 8 | 3705  | AACAUUCA | 3698  | 3 UTR | 0.0482 | 1 |
| <u>CD302</u>      | <u>NM_014880</u>    | 8 | 1335  | AACAUUCA | 1328  | 3 UTR | 0.0482 | 1 |
| <u>CD46</u>       | <u>NM_002389</u>    | 8 | 1579  | ACAUUCA  | 1572  | 3 UTR | 0.0306 | 2 |
| <u>CD46</u>       | <u>NM_002389</u>    | 8 | 1579  | ACAUUCA  | 1572  | 3 UTR | 0.0306 | 2 |
| <u>CD48</u>       | <u>NM_001778</u>    | 8 | 1022  | AACAUUCA | 1015  | 3 UTR | 0.0051 | 1 |
| <u>CD48</u>       | <u>NM_001778</u>    | 7 | 1021  | ACAUUCA  | 1015  | 3 UTR | 0.0202 | 2 |
| <u>CD48</u>       | <u>NM_001778</u>    | 8 | 1022  | AACAUUCA | 1015  | 3 UTR | 0.0051 | 1 |
| <u>CD48</u>       | <u>NM_001778</u>    | 7 | 1021  | ACAUUCA  | 1015  | 3 UTR | 0.0202 | 2 |
| <u>CDC14A</u>     | <u>NM_003672</u>    | 8 | 3665  | AACAUUCA | 3658  | 3 UTR | 0.0303 | 1 |
| <u>CDC14A</u>     | <u>NM_003672</u>    | 8 | 3665  | AACAUUCA | 3658  | 3 UTR | 0.0303 | 1 |
| <u>CDC2</u>       | <u>NM_001130829</u> | 8 | 1449  | AACAUUCA | 1442  | 3 UTR | 0.0135 | 1 |
| <u>CDC2</u>       | <u>NM_001130829</u> | 8 | 1449  | AACAUUCA | 1442  | 3 UTR | 0.0135 | 1 |
| <u>CDC40</u>      | <u>NM_015891</u>    | 8 | 3164  | ACAUUCA  | 3157  | 3 UTR | 0.0316 | 2 |
| <u>CDC40</u>      | <u>NM_015891</u>    | 8 | 3164  | ACAUUCA  | 3157  | 3 UTR | 0.0316 | 2 |
| <u>CDH13</u>      | <u>NM_001257</u>    | 8 | 2493  | AACAUUCA | 2486  | 3 UTR | 0.0238 | 1 |
| <u>CDH13</u>      | <u>NM_001257</u>    | 8 | 2493  | AACAUUCA | 2486  | 3 UTR | 0.0238 | 1 |
| <u>CDH23</u>      | <u>NM_022124</u>    | 8 | 11065 | ACAUUCA  | 11058 | 3 UTR | 0.0104 | 2 |
| <u>CDH23</u>      | <u>NM_022124</u>    | 8 | 11065 | ACAUUCA  | 11058 | 3 UTR | 0.0104 | 2 |
| <u>CDK8</u>       | <u>NM_001260</u>    | 7 | 1740  | ACAUUCA  | 1734  | 3 UTR | 0.0212 | 2 |
| <u>CDK8</u>       | <u>NM_001260</u>    | 7 | 1740  | ACAUUCA  | 1734  | 3 UTR | 0.0212 | 2 |
| <u>CDKN1B</u>     | <u>NM_004064</u>    | 9 | 1821  | AACAUUCA | 1813  | 3 UTR | 0.0051 | 1 |
| <u>CDKN1B</u>     | <u>NM_004064</u>    | 8 | 1820  | ACAUUCA  | 1813  | 3 UTR | 0.0203 | 2 |
| <u>CDKN1B</u>     | <u>NM_004064</u>    | 9 | 1821  | AACAUUCA | 1813  | 3 UTR | 0.0051 | 1 |
| <u>CDKN1B</u>     | <u>NM_004064</u>    | 8 | 1820  | ACAUUCA  | 1813  | 3 UTR | 0.0203 | 2 |
| <u>CDKN2AIP</u>   | <u>NM_017632</u>    | 9 | 2313  | AACAUUCA | 2305  | 3 UTR | 0.0019 | 1 |
| <u>CDKN2AIP</u>   | <u>NM_017632</u>    | 8 | 2312  | ACAUUCA  | 2305  | 3 UTR | 0.0074 | 2 |
| <u>CDKN2AIP</u>   | <u>NM_017632</u>    | 9 | 2313  | AACAUUCA | 2305  | 3 UTR | 0.0019 | 1 |
| <u>CDKN2AIP</u>   | <u>NM_017632</u>    | 8 | 2312  | ACAUUCA  | 2305  | 3 UTR | 0.0074 | 2 |
| <u>CDKN2AIPNL</u> | <u>NM_080656</u>    | 7 | 459   | ACAUUCA  | 453   | 3 UTR | 0.0489 | 2 |
| <u>CDKN2AIPNL</u> | <u>NM_080656</u>    | 7 | 459   | ACAUUCA  | 453   | 3 UTR | 0.0489 | 2 |
| <u>CDKN3</u>      | <u>NM_005192</u>    | 8 | 851   | ACAUUCA  | 844   | 3 UTR | 0.0023 | 2 |
| <u>CDKN3</u>      | <u>NM_005192</u>    | 8 | 851   | ACAUUCA  | 844   | 3 UTR | 0.0023 | 2 |
| <u>CDS1</u>       | <u>NM_001263</u>    | 8 | 3949  | ACAUUCA  | 3942  | 3 UTR | 0.0398 | 2 |
| <u>CDS1</u>       | <u>NM_001263</u>    | 8 | 3949  | ACAUUCA  | 3942  | 3 UTR | 0.0398 | 2 |
| <u>CDYL</u>       | <u>NM_170751</u>    | 8 | 3192  | ACAUUCA  | 3185  | 3 UTR | 0.0227 | 2 |
| <u>CDYL</u>       | <u>NM_170751</u>    | 8 | 3192  | ACAUUCA  | 3185  | 3 UTR | 0.0227 | 2 |
| <u>CEBPG</u>      | <u>NM_001806</u>    | 9 | 784   | AACAUUCA | 776   | 3 UTR | 0.0114 | 1 |

|               |                     |    |       |            |       |       |        |   |
|---------------|---------------------|----|-------|------------|-------|-------|--------|---|
| <u>CEBPG</u>  | <u>NM_001806</u>    | 8  | 2690  | ACAUUCA    | 2683  | 3 UTR | 0.0449 | 2 |
| <u>CEBPG</u>  | <u>NM_001806</u>    | 8  | 783   | ACAUUCA    | 776   | 3 UTR | 0.0449 | 2 |
| <u>CEBPG</u>  | <u>NM_001806</u>    | 9  | 784   | AACAUUCA   | 776   | 3 UTR | 0.0114 | 1 |
| <u>CEBPG</u>  | <u>NM_001806</u>    | 8  | 2690  | ACAUUCA    | 2683  | 3 UTR | 0.0449 | 2 |
| <u>CEBPG</u>  | <u>NM_001806</u>    | 8  | 783   | ACAUUCA    | 776   | 3 UTR | 0.0449 | 2 |
| <u>CENPI</u>  | <u>NM_006733</u>    | 8  | 2550  | AACAUUCA   | 2543  | 3 UTR | 0.0005 | 1 |
| <u>CENPI</u>  | <u>NM_006733</u>    | 7  | 2549  | ACAUUCA    | 2543  | 3 UTR | 0.0018 | 2 |
| <u>CENPI</u>  | <u>NM_006733</u>    | 8  | 2550  | AACAUUCA   | 2543  | 3 UTR | 0.0005 | 1 |
| <u>CENPI</u>  | <u>NM_006733</u>    | 7  | 2549  | ACAUUCA    | 2543  | 3 UTR | 0.0018 | 2 |
| <u>CENTD3</u> | <u>NM_022481</u>    | 7  | 4954  | ACAUUCA    | 4948  | 3 UTR | 0.0341 | 2 |
| <u>CENTD3</u> | <u>NM_022481</u>    | 7  | 4954  | ACAUUCA    | 4948  | 3 UTR | 0.0341 | 2 |
| <u>CEP135</u> | <u>NM_025009</u>    | 8  | 5581  | AACAUUCA   | 5574  | 3 UTR | 0.0305 | 1 |
| <u>CEP135</u> | <u>NM_025009</u>    | 8  | 5581  | AACAUUCA   | 5574  | 3 UTR | 0.0305 | 1 |
| <u>CER1</u>   | <u>NM_005454</u>    | 7  | 1067  | AACAUUC    | 1061  | 3 UTR | 0.0216 | 1 |
| <u>CER1</u>   | <u>NM_005454</u>    | 7  | 1067  | AACAUUC    | 1061  | 3 UTR | 0.0216 | 1 |
| <u>CETN3</u>  | <u>NM_004365</u>    | 7  | 659   | AACAUUC    | 653   | 3 UTR | 0.0222 | 1 |
| <u>CETN3</u>  | <u>NM_004365</u>    | 8  | 872   | ACAUUCA    | 865   | 3 UTR | 0.0056 | 2 |
| <u>CETN3</u>  | <u>NM_004365</u>    | 7  | 659   | AACAUUC    | 653   | 3 UTR | 0.0222 | 1 |
| <u>CETN3</u>  | <u>NM_004365</u>    | 8  | 872   | ACAUUCA    | 865   | 3 UTR | 0.0056 | 2 |
| <u>CFL1</u>   | <u>NM_005507</u>    | 7  | 1139  | AACAUUC    | 1133  | 3 UTR | 0.0315 | 1 |
| <u>CFL1</u>   | <u>NM_005507</u>    | 7  | 1139  | AACAUUC    | 1133  | 3 UTR | 0.0315 | 1 |
| <u>CFL2</u>   | <u>NM_138638</u>    | 8  | 2357  | ACAUUCA    | 2350  | 3 UTR | 0.0371 | 2 |
| <u>CFL2</u>   | <u>NM_138638</u>    | 8  | 2357  | ACAUUCA    | 2350  | 3 UTR | 0.0371 | 2 |
| <u>CHCHD7</u> | <u>NM_001011667</u> | 9  | 553   | AACAUUCA   | 545   | 3 UTR | 0.0051 | 1 |
| <u>CHCHD7</u> | <u>NM_001011667</u> | 8  | 552   | ACAUUCA    | 545   | 3 UTR | 0.0204 | 2 |
| <u>CHCHD7</u> | <u>NM_001011667</u> | 9  | 553   | AACAUUCA   | 545   | 3 UTR | 0.0051 | 1 |
| <u>CHCHD7</u> | <u>NM_001011667</u> | 8  | 552   | ACAUUCA    | 545   | 3 UTR | 0.0204 | 2 |
| <u>CHD2</u>   | <u>NM_001271</u>    | 8  | 6406  | AACAUUCA   | 6399  | 3 UTR | 0.0493 | 1 |
| <u>CHD2</u>   | <u>NM_001271</u>    | 8  | 6406  | AACAUUCA   | 6399  | 3 UTR | 0.0493 | 1 |
| <u>CHD7</u>   | <u>NM_017780</u>    | 9  | 10058 | ACAUUCAAC  | 10050 | 3 UTR | 0.0038 | 2 |
| <u>CHD7</u>   | <u>NM_017780</u>    | 9  | 10058 | ACAUUCAAC  | 10050 | 3 UTR | 0.0038 | 2 |
| <u>CHMP2B</u> | <u>NM_014043</u>    | 8  | 2462  | ACAUUCA    | 2455  | 3 UTR | 0.0262 | 2 |
| <u>CHMP2B</u> | <u>NM_014043</u>    | 8  | 2462  | ACAUUCA    | 2455  | 3 UTR | 0.0262 | 2 |
| <u>CHRNA9</u> | <u>NM_017581</u>    | 7  | 1598  | ACAUUCA    | 1592  | 3 UTR | 0.0263 | 2 |
| <u>CHRNA9</u> | <u>NM_017581</u>    | 7  | 1598  | ACAUUCA    | 1592  | 3 UTR | 0.0263 | 2 |
| <u>CHST9</u>  | <u>NM_031422</u>    | 10 | 3110  | AACAUUCAAC | 3101  | 3 UTR | 0.0006 | 1 |
| <u>CHST9</u>  | <u>NM_031422</u>    | 9  | 3109  | ACAUUCAAC  | 3101  | 3 UTR | 0.0023 | 2 |
| <u>CHST9</u>  | <u>NM_031422</u>    | 10 | 3110  | AACAUUCAAC | 3101  | 3 UTR | 0.0006 | 1 |

|                |                     |    |       |            |       |       |        |   |
|----------------|---------------------|----|-------|------------|-------|-------|--------|---|
| <u>CHST9</u>   | <u>NM_031422</u>    | 9  | 3109  | ACAUUCAAC  | 3101  | 3 UTR | 0.0023 | 2 |
| <u>CIDEA</u>   | <u>NM_198289</u>    | 7  | 1015  | AACAUUC    | 1009  | 3 UTR | 0.0226 | 1 |
| <u>CIDEA</u>   | <u>NM_198289</u>    | 7  | 1015  | AACAUUC    | 1009  | 3 UTR | 0.0226 | 1 |
| <u>CIT</u>     | <u>NM_007174</u>    | 9  | 8015  | AACAUUCA   | 8007  | 3 UTR | 0.0093 | 1 |
| <u>CIT</u>     | <u>NM_007174</u>    | 8  | 8014  | ACAUUCA    | 8007  | 3 UTR | 0.0365 | 2 |
| <u>CIT</u>     | <u>NM_007174</u>    | 9  | 8015  | AACAUUCA   | 8007  | 3 UTR | 0.0093 | 1 |
| <u>CIT</u>     | <u>NM_007174</u>    | 8  | 8014  | ACAUUCA    | 8007  | 3 UTR | 0.0365 | 2 |
| <u>CLCC1</u>   | <u>NM_001048210</u> | 10 | 2426  | AACAUUCAAC | 2417  | 3 UTR | 0.0029 | 1 |
| <u>CLCC1</u>   | <u>NM_001048210</u> | 9  | 2425  | ACAUUCAAC  | 2417  | 3 UTR | 0.0115 | 2 |
| <u>CLCC1</u>   | <u>NM_001048210</u> | 10 | 2426  | AACAUUCAAC | 2417  | 3 UTR | 0.0029 | 1 |
| <u>CLCC1</u>   | <u>NM_001048210</u> | 9  | 2425  | ACAUUCAAC  | 2417  | 3 UTR | 0.0115 | 2 |
| <u>CLCN6</u>   | <u>NM_001286</u>    | 8  | 4736  | AACAUUCA   | 4729  | 3 UTR | 0.0436 | 1 |
| <u>CLCN6</u>   | <u>NM_001286</u>    | 8  | 4736  | AACAUUCA   | 4729  | 3 UTR | 0.0436 | 1 |
| <u>CLDN18</u>  | <u>NM_016369</u>    | 8  | 3320  | AACAUUCA   | 3313  | 3 UTR | 0.0376 | 1 |
| <u>CLDN18</u>  | <u>NM_016369</u>    | 8  | 3320  | AACAUUCA   | 3313  | 3 UTR | 0.0376 | 1 |
| <u>CLEC12A</u> | <u>NM_138337</u>    | 8  | 1157  | AACAUUCA   | 1150  | 3 UTR | 0.0096 | 1 |
| <u>CLEC12A</u> | <u>NM_138337</u>    | 7  | 1156  | ACAUUCA    | 1150  | 3 UTR | 0.0379 | 2 |
| <u>CLEC12A</u> | <u>NM_138337</u>    | 8  | 1157  | AACAUUCA   | 1150  | 3 UTR | 0.0096 | 1 |
| <u>CLEC12A</u> | <u>NM_138337</u>    | 7  | 1156  | ACAUUCA    | 1150  | 3 UTR | 0.0379 | 2 |
| <u>CLEC3A</u>  | <u>NM_005752</u>    | 8  | 1830  | ACAUUCA    | 1823  | 3 UTR | 0.0195 | 2 |
| <u>CLEC3A</u>  | <u>NM_005752</u>    | 8  | 1830  | ACAUUCA    | 1823  | 3 UTR | 0.0195 | 2 |
| <u>CLIP1</u>   | <u>NM_002956</u>    | 8  | 5613  | ACAUUCA    | 5606  | 3 UTR | 0.0220 | 2 |
| <u>CLIP1</u>   | <u>NM_002956</u>    | 8  | 5613  | ACAUUCA    | 5606  | 3 UTR | 0.0220 | 2 |
| <u>CLMN</u>    | <u>NM_024734</u>    | 9  | 12375 | AACAUUCA   | 12367 | 3 UTR | 0.0361 | 1 |
| <u>CLMN</u>    | <u>NM_024734</u>    | 9  | 12375 | AACAUUCA   | 12367 | 3 UTR | 0.0361 | 1 |
| <u>CMPK2</u>   | <u>NM_207315</u>    | 8  | 2464  | ACAUUCA    | 2457  | 3 UTR | 0.0234 | 2 |
| <u>CMPK2</u>   | <u>NM_207315</u>    | 8  | 2464  | ACAUUCA    | 2457  | 3 UTR | 0.0234 | 2 |
| <u>CNGB1</u>   | <u>NM_001297</u>    | 8  | 4209  | ACAUUCA    | 4202  | 3 UTR | 0.0277 | 2 |
| <u>CNGB1</u>   | <u>NM_001297</u>    | 8  | 4209  | ACAUUCA    | 4202  | 3 UTR | 0.0277 | 2 |
| <u>CNNM2</u>   | <u>NM_017649</u>    | 8  | 3504  | AACAUUCA   | 3497  | 3 UTR | 0.0199 | 1 |
| <u>CNNM2</u>   | <u>NM_017649</u>    | 8  | 3504  | AACAUUCA   | 3497  | 3 UTR | 0.0199 | 1 |
| <u>CNOT1</u>   | <u>NM_016284</u>    | 9  | 8317  | AACAUUCA   | 8309  | 3 UTR | 0.0039 | 1 |
| <u>CNOT1</u>   | <u>NM_016284</u>    | 8  | 8316  | ACAUUCA    | 8309  | 3 UTR | 0.0155 | 2 |
| <u>CNOT1</u>   | <u>NM_016284</u>    | 9  | 8317  | AACAUUCA   | 8309  | 3 UTR | 0.0039 | 1 |
| <u>CNOT1</u>   | <u>NM_016284</u>    | 8  | 8316  | ACAUUCA    | 8309  | 3 UTR | 0.0155 | 2 |
| <u>CNOT4</u>   | <u>NM_013316</u>    | 10 | 2459  | AACAUUCAAC | 2450  | 3 UTR | 0.0011 | 1 |
| <u>CNOT4</u>   | <u>NM_013316</u>    | 9  | 2458  | ACAUUCAAC  | 2450  | 3 UTR | 0.0042 | 2 |
| <u>CNOT4</u>   | <u>NM_013316</u>    | 10 | 2459  | AACAUUCAAC | 2450  | 3 UTR | 0.0011 | 1 |

|                |                  |    |       |            |       |       |        |   |
|----------------|------------------|----|-------|------------|-------|-------|--------|---|
| <u>CNOT4</u>   | <u>NM_013316</u> | 9  | 2458  | ACAUUCAAC  | 2450  | 3 UTR | 0.0042 | 2 |
| <u>CNOT6L</u>  | <u>NM_144571</u> | 10 | 7660  | AACAUUCAAC | 7651  | 3 UTR | 0.0067 | 1 |
| <u>CNOT6L</u>  | <u>NM_144571</u> | 9  | 7659  | ACAUUCAAC  | 7651  | 3 UTR | 0.0265 | 2 |
| <u>CNOT6L</u>  | <u>NM_144571</u> | 10 | 7660  | AACAUUCAAC | 7651  | 3 UTR | 0.0067 | 1 |
| <u>CNOT6L</u>  | <u>NM_144571</u> | 9  | 7659  | ACAUUCAAC  | 7651  | 3 UTR | 0.0265 | 2 |
| <u>CNTN1</u>   | <u>NM_001843</u> | 7  | 3174  | ACAUUCA    | 3168  | 3 UTR | 0.0156 | 2 |
| <u>CNTN1</u>   | <u>NM_001843</u> | 7  | 3174  | ACAUUCA    | 3168  | 3 UTR | 0.0156 | 2 |
| <u>CNTN4</u>   | <u>NM_175607</u> | 8  | 4221  | ACAUUCAA   | 4214  | 3 UTR | 0.0262 | 2 |
| <u>CNTN4</u>   | <u>NM_175607</u> | 8  | 4221  | ACAUUCAA   | 4214  | 3 UTR | 0.0262 | 2 |
| <u>CNTNAP4</u> | <u>NM_033401</u> | 7  | 4403  | ACAUUCA    | 4397  | 3 UTR | 0.0333 | 2 |
| <u>CNTNAP4</u> | <u>NM_033401</u> | 7  | 4403  | ACAUUCA    | 4397  | 3 UTR | 0.0333 | 2 |
| <u>COASY</u>   | <u>NM_025233</u> | 8  | 2547  | AACAUUCA   | 2540  | 3 UTR | 0.0047 | 1 |
| <u>COASY</u>   | <u>NM_025233</u> | 7  | 2546  | ACAUUCA    | 2540  | 3 UTR | 0.0187 | 2 |
| <u>COASY</u>   | <u>NM_025233</u> | 8  | 2547  | AACAUUCA   | 2540  | 3 UTR | 0.0047 | 1 |
| <u>COASY</u>   | <u>NM_025233</u> | 7  | 2546  | ACAUUCA    | 2540  | 3 UTR | 0.0187 | 2 |
| <u>COL16A1</u> | <u>NM_001856</u> | 8  | 5265  | AACAUUCA   | 5258  | 3 UTR | 0.0061 | 1 |
| <u>COL16A1</u> | <u>NM_001856</u> | 7  | 5264  | ACAUUCA    | 5258  | 3 UTR | 0.0244 | 2 |
| <u>COL16A1</u> | <u>NM_001856</u> | 8  | 5265  | AACAUUCA   | 5258  | 3 UTR | 0.0061 | 1 |
| <u>COL16A1</u> | <u>NM_001856</u> | 7  | 5264  | ACAUUCA    | 5258  | 3 UTR | 0.0244 | 2 |
| <u>COL19A1</u> | <u>NM_001858</u> | 10 | 4030  | AACAUUCAAC | 4021  | 3 UTR | 0.0049 | 1 |
| <u>COL19A1</u> | <u>NM_001858</u> | 9  | 4029  | ACAUUCAAC  | 4021  | 3 UTR | 0.0196 | 2 |
| <u>COL19A1</u> | <u>NM_001858</u> | 10 | 4030  | AACAUUCAAC | 4021  | 3 UTR | 0.0049 | 1 |
| <u>COL19A1</u> | <u>NM_001858</u> | 9  | 4029  | ACAUUCAAC  | 4021  | 3 UTR | 0.0196 | 2 |
| <u>COL1A2</u>  | <u>NM_000089</u> | 7  | 5089  | AACAUUC    | 5083  | 3 UTR | 0.0499 | 1 |
| <u>COL1A2</u>  | <u>NM_000089</u> | 7  | 5089  | AACAUUC    | 5083  | 3 UTR | 0.0499 | 1 |
| <u>COL5A1</u>  | <u>NM_000093</u> | 8  | 7309  | AACAUUCA   | 7302  | 3 UTR | 0.0380 | 1 |
| <u>COL5A1</u>  | <u>NM_000093</u> | 8  | 7309  | AACAUUCA   | 7302  | 3 UTR | 0.0380 | 1 |
| <u>COL6A3</u>  | <u>NM_004369</u> | 9  | 10052 | AACAUUCAA  | 10044 | 3 UTR | 0.0030 | 1 |
| <u>COL6A3</u>  | <u>NM_004369</u> | 8  | 10051 | ACAUUCAA   | 10044 | 3 UTR | 0.0118 | 2 |
| <u>COL6A3</u>  | <u>NM_004369</u> | 9  | 10052 | AACAUUCAA  | 10044 | 3 UTR | 0.0030 | 1 |
| <u>COL6A3</u>  | <u>NM_004369</u> | 8  | 10051 | ACAUUCAA   | 10044 | 3 UTR | 0.0118 | 2 |
| <u>COPS2</u>   | <u>NM_004236</u> | 8  | 2349  | AACAUUCA   | 2342  | 3 UTR | 0.0092 | 1 |
| <u>COPS2</u>   | <u>NM_004236</u> | 7  | 2304  | AACAUUC    | 2298  | 3 UTR | 0.0362 | 1 |
| <u>COPS2</u>   | <u>NM_004236</u> | 8  | 2726  | ACAUUCAA   | 2719  | 3 UTR | 0.0092 | 2 |
| <u>COPS2</u>   | <u>NM_004236</u> | 7  | 2348  | ACAUUCA    | 2342  | 3 UTR | 0.0362 | 2 |
| <u>COPS2</u>   | <u>NM_004236</u> | 8  | 2349  | AACAUUCA   | 2342  | 3 UTR | 0.0092 | 1 |
| <u>COPS2</u>   | <u>NM_004236</u> | 7  | 2304  | AACAUUC    | 2298  | 3 UTR | 0.0362 | 1 |
| <u>COPS2</u>   | <u>NM_004236</u> | 8  | 2726  | ACAUUCAA   | 2719  | 3 UTR | 0.0092 | 2 |

|               |                  |    |      |             |      |       |        |   |
|---------------|------------------|----|------|-------------|------|-------|--------|---|
| <u>COPS2</u>  | <u>NM_004236</u> | 7  | 2348 | ACAUUCA     | 2342 | 3 UTR | 0.0362 | 2 |
| <u>COQ10B</u> | <u>NM_025147</u> | 9  | 1827 | ACAUUCAAC   | 1819 | 3 UTR | 0.0046 | 2 |
| <u>COQ10B</u> | <u>NM_025147</u> | 9  | 1827 | ACAUUCAAC   | 1819 | 3 UTR | 0.0046 | 2 |
| <u>COQ2</u>   | <u>NM_015697</u> | 7  | 1483 | ACAUUCA     | 1477 | 3 UTR | 0.0236 | 2 |
| <u>COQ2</u>   | <u>NM_015697</u> | 7  | 1483 | ACAUUCA     | 1477 | 3 UTR | 0.0236 | 2 |
| <u>CORO1C</u> | <u>NM_014325</u> | 8  | 3313 | AACAUUCA    | 3306 | 3 UTR | 0.0346 | 1 |
| <u>CORO1C</u> | <u>NM_014325</u> | 8  | 3313 | AACAUUCA    | 3306 | 3 UTR | 0.0346 | 1 |
| <u>COX11</u>  | <u>NM_004375</u> | 8  | 1568 | AACAUUCA    | 1561 | 3 UTR | 0.0277 | 1 |
| <u>COX11</u>  | <u>NM_004375</u> | 8  | 1568 | AACAUUCA    | 1561 | 3 UTR | 0.0277 | 1 |
| <u>CP110</u>  | <u>NM_014711</u> | 8  | 4080 | ACAUUCA     | 4073 | 3 UTR | 0.0323 | 2 |
| <u>CP110</u>  | <u>NM_014711</u> | 8  | 4080 | ACAUUCA     | 4073 | 3 UTR | 0.0323 | 2 |
| <u>CPA6</u>   | <u>NM_020361</u> | 7  | 1825 | AACAUUC     | 1819 | 3 UTR | 0.0204 | 1 |
| <u>CPA6</u>   | <u>NM_020361</u> | 7  | 1825 | AACAUUC     | 1819 | 3 UTR | 0.0204 | 1 |
| <u>CPD</u>    | <u>NM_001304</u> | 9  | 5552 | AACAUUCA    | 5544 | 3 UTR | 0.0146 | 1 |
| <u>CPD</u>    | <u>NM_001304</u> | 9  | 5552 | AACAUUCA    | 5544 | 3 UTR | 0.0146 | 1 |
| <u>CPNE2</u>  | <u>NM_152727</u> | 8  | 2129 | ACAUUCA     | 2122 | 3 UTR | 0.0047 | 2 |
| <u>CPNE2</u>  | <u>NM_152727</u> | 8  | 2129 | ACAUUCA     | 2122 | 3 UTR | 0.0047 | 2 |
| <u>CPNE4</u>  | <u>NM_130808</u> | 8  | 2478 | AACAUUCA    | 2471 | 3 UTR | 0.0073 | 1 |
| <u>CPNE4</u>  | <u>NM_130808</u> | 7  | 2477 | ACAUUCA     | 2471 | 3 UTR | 0.0288 | 2 |
| <u>CPNE4</u>  | <u>NM_130808</u> | 8  | 2478 | AACAUUCA    | 2471 | 3 UTR | 0.0073 | 1 |
| <u>CPNE4</u>  | <u>NM_130808</u> | 7  | 2477 | ACAUUCA     | 2471 | 3 UTR | 0.0288 | 2 |
| <u>CPOX</u>   | <u>NM_000097</u> | 11 | 2596 | AACAUUCAACG | 2586 | 3 UTR | 0.0003 | 1 |
| <u>CPOX</u>   | <u>NM_000097</u> | 10 | 2595 | ACAUUCAACG  | 2586 | 3 UTR | 0.0012 | 2 |
| <u>CPOX</u>   | <u>NM_000097</u> | 8  | 2184 | ACAUUCA     | 2177 | 3 UTR | 0.0190 | 2 |
| <u>CPOX</u>   | <u>NM_000097</u> | 11 | 2596 | AACAUUCAACG | 2586 | 3 UTR | 0.0003 | 1 |
| <u>CPOX</u>   | <u>NM_000097</u> | 10 | 2595 | ACAUUCAACG  | 2586 | 3 UTR | 0.0012 | 2 |
| <u>CPOX</u>   | <u>NM_000097</u> | 8  | 2184 | ACAUUCA     | 2177 | 3 UTR | 0.0190 | 2 |
| <u>CREB1</u>  | <u>NM_134442</u> | 8  | 9255 | AACAUUCA    | 9248 | 3 UTR | 0.0271 | 1 |
| <u>CREB1</u>  | <u>NM_134442</u> | 8  | 1452 | AACAUUCA    | 1445 | 3 UTR | 0.0271 | 1 |
| <u>CREB1</u>  | <u>NM_134442</u> | 8  | 9255 | AACAUUCA    | 9248 | 3 UTR | 0.0271 | 1 |
| <u>CREB1</u>  | <u>NM_134442</u> | 8  | 1452 | AACAUUCA    | 1445 | 3 UTR | 0.0271 | 1 |
| <u>CREBL2</u> | <u>NM_001310</u> | 8  | 1531 | AACAUUCA    | 1524 | 3 UTR | 0.0463 | 1 |
| <u>CREBL2</u> | <u>NM_001310</u> | 8  | 1531 | AACAUUCA    | 1524 | 3 UTR | 0.0463 | 1 |
| <u>CREG2</u>  | <u>NM_153836</u> | 8  | 2866 | AACAUUCA    | 2859 | 3 UTR | 0.0384 | 1 |
| <u>CREG2</u>  | <u>NM_153836</u> | 8  | 2866 | AACAUUCA    | 2859 | 3 UTR | 0.0384 | 1 |
| <u>CRH</u>    | <u>NM_000756</u> | 7  | 1245 | AACAUUC     | 1239 | 3 UTR | 0.0302 | 1 |
| <u>CRH</u>    | <u>NM_000756</u> | 7  | 1245 | AACAUUC     | 1239 | 3 UTR | 0.0302 | 1 |
| <u>CRHBP</u>  | <u>NM_001882</u> | 7  | 1828 | AACAUUC     | 1822 | 3 UTR | 0.0363 | 1 |

|                 |                     |   |       |            |       |       |        |   |
|-----------------|---------------------|---|-------|------------|-------|-------|--------|---|
| <u>CRHBP</u>    | <u>NM_001882</u>    | 7 | 1828  | AACAUUC    | 1822  | 3 UTR | 0.0363 | 1 |
| <u>CRIM1</u>    | <u>NM_016441</u>    | 9 | 4345  | ACAUUCAAC  | 4337  | 3 UTR | 0.0093 | 2 |
| <u>CRIM1</u>    | <u>NM_016441</u>    | 9 | 4345  | ACAUUCAAC  | 4337  | 3 UTR | 0.0093 | 2 |
| <u>CRISPLD1</u> | <u>NM_031461</u>    | 8 | 2227  | ACAUUCAAA  | 2220  | 3 UTR | 0.0347 | 2 |
| <u>CRISPLD1</u> | <u>NM_031461</u>    | 8 | 2227  | ACAUUCAAA  | 2220  | 3 UTR | 0.0347 | 2 |
| <u>CRY2</u>     | <u>NM_021117</u>    | 8 | 2066  | AACAUUCA   | 2059  | 3 UTR | 0.0350 | 1 |
| <u>CRY2</u>     | <u>NM_021117</u>    | 8 | 2066  | AACAUUCA   | 2059  | 3 UTR | 0.0350 | 1 |
| <u>CSDA</u>     | <u>NM_003651</u>    | 7 | 1971  | AACAUUC    | 1965  | 3 UTR | 0.0370 | 1 |
| <u>CSDA</u>     | <u>NM_003651</u>    | 7 | 1521  | AACAUUC    | 1515  | 3 UTR | 0.0370 | 1 |
| <u>CSDA</u>     | <u>NM_003651</u>    | 7 | 1971  | AACAUUC    | 1965  | 3 UTR | 0.0370 | 1 |
| <u>CSDA</u>     | <u>NM_003651</u>    | 7 | 1521  | AACAUUC    | 1515  | 3 UTR | 0.0370 | 1 |
| <u>CSNK2A2</u>  | <u>NM_001896</u>    | 7 | 1474  | AACAUUC    | 1468  | 3 UTR | 0.0288 | 1 |
| <u>CSNK2A2</u>  | <u>NM_001896</u>    | 7 | 1474  | AACAUUC    | 1468  | 3 UTR | 0.0288 | 1 |
| <u>CSRP3</u>    | <u>NM_003476</u>    | 8 | 852   | AACAUUCA   | 845   | 3 UTR | 0.0097 | 1 |
| <u>CSRP3</u>    | <u>NM_003476</u>    | 7 | 851   | ACAUUCA    | 845   | 3 UTR | 0.0383 | 2 |
| <u>CSRP3</u>    | <u>NM_003476</u>    | 8 | 852   | AACAUUCA   | 845   | 3 UTR | 0.0097 | 1 |
| <u>CSRP3</u>    | <u>NM_003476</u>    | 7 | 851   | ACAUUCA    | 845   | 3 UTR | 0.0383 | 2 |
| <u>CTAGE1</u>   | <u>NM_172241</u>    | 8 | 3527  | ACAUUCAAA  | 3520  | 3 UTR | 0.0297 | 2 |
| <u>CTAGE1</u>   | <u>NM_172241</u>    | 8 | 3527  | ACAUUCAAA  | 3520  | 3 UTR | 0.0297 | 2 |
| <u>CTDSPL</u>   | <u>NM_001008392</u> | 9 | 2832  | AACAUUCAAA | 2824  | 3 UTR | 0.0136 | 1 |
| <u>CTDSPL</u>   | <u>NM_001008392</u> | 9 | 1266  | AACAUUCAAA | 1258  | 3 UTR | 0.0136 | 1 |
| <u>CTDSPL</u>   | <u>NM_001008392</u> | 9 | 2832  | AACAUUCAAA | 2824  | 3 UTR | 0.0136 | 1 |
| <u>CTDSPL</u>   | <u>NM_001008392</u> | 9 | 1266  | AACAUUCAAA | 1258  | 3 UTR | 0.0136 | 1 |
| <u>CTH</u>      | <u>NM_001902</u>    | 7 | 1739  | AACAUUC    | 1733  | 3 UTR | 0.0275 | 1 |
| <u>CTH</u>      | <u>NM_001902</u>    | 7 | 1739  | AACAUUC    | 1733  | 3 UTR | 0.0275 | 1 |
| <u>CTNNA1</u>   | <u>NM_001903</u>    | 9 | 3711  | AACAUUCAAA | 3703  | 3 UTR | 0.0037 | 1 |
| <u>CTNNA1</u>   | <u>NM_001903</u>    | 8 | 3710  | ACAUUCAAA  | 3703  | 3 UTR | 0.0146 | 2 |
| <u>CTNNA1</u>   | <u>NM_001903</u>    | 9 | 3711  | AACAUUCAAA | 3703  | 3 UTR | 0.0037 | 1 |
| <u>CTNNA1</u>   | <u>NM_001903</u>    | 8 | 3710  | ACAUUCAAA  | 3703  | 3 UTR | 0.0146 | 2 |
| <u>CTNND1</u>   | <u>NM_001085458</u> | 8 | 5835  | ACAUUCAAA  | 5828  | 3 UTR | 0.0431 | 2 |
| <u>CTNND1</u>   | <u>NM_001085458</u> | 8 | 5835  | ACAUUCAAA  | 5828  | 3 UTR | 0.0431 | 2 |
| <u>CUBN</u>     | <u>NM_001081</u>    | 8 | 11896 | AACAUUCA   | 11889 | 3 UTR | 0.0153 | 1 |
| <u>CUBN</u>     | <u>NM_001081</u>    | 8 | 11896 | AACAUUCA   | 11889 | 3 UTR | 0.0153 | 1 |
| <u>CXCL1</u>    | <u>NM_001511</u>    | 7 | 722   | AACAUUC    | 716   | 3 UTR | 0.0418 | 1 |
| <u>CXCL1</u>    | <u>NM_001511</u>    | 7 | 883   | ACAUUCA    | 877   | 3 UTR | 0.0418 | 2 |
| <u>CXCL1</u>    | <u>NM_001511</u>    | 7 | 722   | AACAUUC    | 716   | 3 UTR | 0.0418 | 1 |
| <u>CXCL1</u>    | <u>NM_001511</u>    | 7 | 883   | ACAUUCA    | 877   | 3 UTR | 0.0418 | 2 |
| <u>CXCL2</u>    | <u>NM_002089</u>    | 7 | 969   | ACAUUCA    | 963   | 3 UTR | 0.0447 | 2 |

|                |                     |   |      |           |      |       |        |   |
|----------------|---------------------|---|------|-----------|------|-------|--------|---|
| <u>CXCL2</u>   | <u>NM_002089</u>    | 7 | 969  | ACAUUCA   | 963  | 3 UTR | 0.0447 | 2 |
| <u>CXorf30</u> | <u>NM_001098843</u> | 8 | 2729 | AACAUUCA  | 2722 | 3 UTR | 0.0049 | 1 |
| <u>CXorf30</u> | <u>NM_001098843</u> | 8 | 2729 | AACAUUCA  | 2722 | 3 UTR | 0.0049 | 1 |
| <u>CYB5R4</u>  | <u>NM_016230</u>    | 7 | 2160 | AACAUUC   | 2154 | 3 UTR | 0.0337 | 1 |
| <u>CYB5R4</u>  | <u>NM_016230</u>    | 7 | 2160 | AACAUUC   | 2154 | 3 UTR | 0.0337 | 1 |
| <u>CYP11B1</u> | <u>NM_000497</u>    | 8 | 3503 | ACAUUCAA  | 3496 | 3 UTR | 0.0305 | 2 |
| <u>CYP11B1</u> | <u>NM_000497</u>    | 8 | 3503 | ACAUUCAA  | 3496 | 3 UTR | 0.0305 | 2 |
| <u>CYP19A1</u> | <u>NM_031226</u>    | 8 | 4088 | ACAUUCAA  | 4081 | 3 UTR | 0.0414 | 2 |
| <u>CYP19A1</u> | <u>NM_031226</u>    | 8 | 4088 | ACAUUCAA  | 4081 | 3 UTR | 0.0414 | 2 |
| <u>CYP26A1</u> | <u>NM_057157</u>    | 9 | 1679 | AACAUUCA  | 1671 | 3 UTR | 0.0022 | 1 |
| <u>CYP26A1</u> | <u>NM_057157</u>    | 8 | 1678 | ACAUUCAA  | 1671 | 3 UTR | 0.0088 | 2 |
| <u>CYP26A1</u> | <u>NM_057157</u>    | 9 | 1679 | AACAUUCA  | 1671 | 3 UTR | 0.0022 | 1 |
| <u>CYP26A1</u> | <u>NM_057157</u>    | 8 | 1678 | ACAUUCAA  | 1671 | 3 UTR | 0.0088 | 2 |
| <u>CYP26B1</u> | <u>NM_019885</u>    | 8 | 4455 | AACAUUCA  | 4448 | 3 UTR | 0.0447 | 1 |
| <u>CYP26B1</u> | <u>NM_019885</u>    | 8 | 4455 | AACAUUCA  | 4448 | 3 UTR | 0.0447 | 1 |
| <u>CYP2C8</u>  | <u>NM_000770</u>    | 7 | 1891 | ACAUUCA   | 1885 | 3 UTR | 0.0215 | 2 |
| <u>CYP2C8</u>  | <u>NM_000770</u>    | 7 | 1891 | ACAUUCA   | 1885 | 3 UTR | 0.0215 | 2 |
| <u>CYP4F2</u>  | <u>NM_001082</u>    | 8 | 1782 | AACAUUCA  | 1775 | 3 UTR | 0.0113 | 1 |
| <u>CYP4F2</u>  | <u>NM_001082</u>    | 7 | 1781 | ACAUUCA   | 1775 | 3 UTR | 0.0446 | 2 |
| <u>CYP4F2</u>  | <u>NM_001082</u>    | 8 | 1782 | AACAUUCA  | 1775 | 3 UTR | 0.0113 | 1 |
| <u>CYP4F2</u>  | <u>NM_001082</u>    | 7 | 1781 | ACAUUCA   | 1775 | 3 UTR | 0.0446 | 2 |
| <u>CYP7A1</u>  | <u>NM_000780</u>    | 8 | 1835 | AACAUUCA  | 1828 | 3 UTR | 0.0196 | 1 |
| <u>CYP7A1</u>  | <u>NM_000780</u>    | 8 | 1835 | AACAUUCA  | 1828 | 3 UTR | 0.0196 | 1 |
| <u>CYR61</u>   | <u>NM_001554</u>    | 8 | 1896 | AACAUUCA  | 1889 | 3 UTR | 0.0140 | 1 |
| <u>CYR61</u>   | <u>NM_001554</u>    | 8 | 1896 | AACAUUCA  | 1889 | 3 UTR | 0.0140 | 1 |
| <u>D4S234E</u> | <u>NM_014392</u>    | 8 | 2690 | ACAUUCAA  | 2683 | 3 UTR | 0.0244 | 2 |
| <u>D4S234E</u> | <u>NM_014392</u>    | 8 | 2690 | ACAUUCAA  | 2683 | 3 UTR | 0.0244 | 2 |
| <u>DAD1</u>    | <u>NM_001344</u>    | 7 | 469  | AACAUUC   | 463  | 3 UTR | 0.0175 | 1 |
| <u>DAD1</u>    | <u>NM_001344</u>    | 7 | 469  | AACAUUC   | 463  | 3 UTR | 0.0175 | 1 |
| <u>DAK</u>     | <u>NM_015533</u>    | 8 | 3982 | AACAUUCA  | 3975 | 3 UTR | 0.0339 | 1 |
| <u>DAK</u>     | <u>NM_015533</u>    | 8 | 3982 | AACAUUCA  | 3975 | 3 UTR | 0.0339 | 1 |
| <u>DARS</u>    | <u>NM_001349</u>    | 7 | 2163 | ACAUUCA   | 2157 | 3 UTR | 0.0378 | 2 |
| <u>DARS</u>    | <u>NM_001349</u>    | 7 | 2163 | ACAUUCA   | 2157 | 3 UTR | 0.0378 | 2 |
| <u>DAXX</u>    | <u>NM_001350</u>    | 7 | 2459 | AACAUUC   | 2453 | 3 UTR | 0.0084 | 1 |
| <u>DAXX</u>    | <u>NM_001350</u>    | 7 | 2459 | AACAUUC   | 2453 | 3 UTR | 0.0084 | 1 |
| <u>DCLK3</u>   | <u>NM_033403</u>    | 8 | 5235 | ACAUUCAA  | 5228 | 3 UTR | 0.0434 | 2 |
| <u>DCLK3</u>   | <u>NM_033403</u>    | 8 | 5235 | ACAUUCAA  | 5228 | 3 UTR | 0.0434 | 2 |
| <u>DCN</u>     | <u>NM_001920</u>    | 9 | 2190 | ACAUUCAAC | 2182 | 3 UTR | 0.0031 | 2 |

|                |                     |   |       |          |       |       |        |   |
|----------------|---------------------|---|-------|----------|-------|-------|--------|---|
| <u>DCN</u>     | <u>NM_001920</u>    | 8 | 1939  | ACAUCAA  | 1932  | 3 UTR | 0.0124 | 2 |
| <u>DCN</u>     | <u>NM_001920</u>    | 9 | 2190  | ACAUCAAC | 2182  | 3 UTR | 0.0031 | 2 |
| <u>DCN</u>     | <u>NM_001920</u>    | 8 | 1939  | ACAUCAA  | 1932  | 3 UTR | 0.0124 | 2 |
| <u>DCUN1D1</u> | <u>NM_020640</u>    | 9 | 1702  | AACAUCAA | 1694  | 3 UTR | 0.0090 | 1 |
| <u>DCUN1D1</u> | <u>NM_020640</u>    | 8 | 1701  | ACAUCAA  | 1694  | 3 UTR | 0.0354 | 2 |
| <u>DCUN1D1</u> | <u>NM_020640</u>    | 9 | 1702  | AACAUCAA | 1694  | 3 UTR | 0.0090 | 1 |
| <u>DCUN1D1</u> | <u>NM_020640</u>    | 8 | 1701  | ACAUCAA  | 1694  | 3 UTR | 0.0354 | 2 |
| <u>DDHD1</u>   | <u>NM_030637</u>    | 7 | 11080 | AACAUUC  | 11074 | 3 UTR | 0.0453 | 1 |
| <u>DDHD1</u>   | <u>NM_030637</u>    | 7 | 11080 | AACAUUC  | 11074 | 3 UTR | 0.0453 | 1 |
| <u>DDO</u>     | <u>NM_003649</u>    | 8 | 1543  | AACAUUCA | 1536  | 3 UTR | 0.0094 | 1 |
| <u>DDO</u>     | <u>NM_003649</u>    | 7 | 1542  | ACAUCA   | 1536  | 3 UTR | 0.0371 | 2 |
| <u>DDO</u>     | <u>NM_003649</u>    | 8 | 1543  | AACAUUCA | 1536  | 3 UTR | 0.0094 | 1 |
| <u>DDO</u>     | <u>NM_003649</u>    | 7 | 1542  | ACAUCA   | 1536  | 3 UTR | 0.0371 | 2 |
| <u>DDX20</u>   | <u>NM_007204</u>    | 8 | 3385  | ACAUCAA  | 3378  | 3 UTR | 0.0103 | 2 |
| <u>DDX20</u>   | <u>NM_007204</u>    | 8 | 3385  | ACAUCAA  | 3378  | 3 UTR | 0.0103 | 2 |
| <u>DDX3X</u>   | <u>NM_001356</u>    | 9 | 4748  | AACAUCAA | 4740  | 3 UTR | 0.0098 | 1 |
| <u>DDX3X</u>   | <u>NM_001356</u>    | 9 | 4754  | ACAUCAAC | 4746  | 3 UTR | 0.0098 | 2 |
| <u>DDX3X</u>   | <u>NM_001356</u>    | 8 | 4747  | ACAUCAA  | 4740  | 3 UTR | 0.0387 | 2 |
| <u>DDX3X</u>   | <u>NM_001356</u>    | 9 | 4748  | AACAUCAA | 4740  | 3 UTR | 0.0098 | 1 |
| <u>DDX3X</u>   | <u>NM_001356</u>    | 9 | 4754  | ACAUCAAC | 4746  | 3 UTR | 0.0098 | 2 |
| <u>DDX3X</u>   | <u>NM_001356</u>    | 8 | 4747  | ACAUCAA  | 4740  | 3 UTR | 0.0387 | 2 |
| <u>DDX3Y</u>   | <u>NM_001122665</u> | 9 | 4127  | AACAUCAA | 4119  | 3 UTR | 0.0089 | 1 |
| <u>DDX3Y</u>   | <u>NM_001122665</u> | 9 | 4133  | ACAUCAAC | 4125  | 3 UTR | 0.0089 | 2 |
| <u>DDX3Y</u>   | <u>NM_001122665</u> | 8 | 4126  | ACAUCAA  | 4119  | 3 UTR | 0.0353 | 2 |
| <u>DDX3Y</u>   | <u>NM_001122665</u> | 9 | 4127  | AACAUCAA | 4119  | 3 UTR | 0.0089 | 1 |
| <u>DDX3Y</u>   | <u>NM_001122665</u> | 9 | 4133  | ACAUCAAC | 4125  | 3 UTR | 0.0089 | 2 |
| <u>DDX3Y</u>   | <u>NM_001122665</u> | 8 | 4126  | ACAUCAA  | 4119  | 3 UTR | 0.0353 | 2 |
| <u>DDX43</u>   | <u>NM_018665</u>    | 7 | 2525  | AACAUUC  | 2519  | 3 UTR | 0.0128 | 1 |
| <u>DDX43</u>   | <u>NM_018665</u>    | 7 | 2525  | AACAUUC  | 2519  | 3 UTR | 0.0128 | 1 |
| <u>DDX5</u>    | <u>NM_004396</u>    | 8 | 3286  | AACAUUCA | 3279  | 3 UTR | 0.0047 | 1 |
| <u>DDX5</u>    | <u>NM_004396</u>    | 7 | 3285  | ACAUCA   | 3279  | 3 UTR | 0.0187 | 2 |
| <u>DDX5</u>    | <u>NM_004396</u>    | 7 | 3022  | ACAUCA   | 3016  | 3 UTR | 0.0187 | 2 |
| <u>DDX5</u>    | <u>NM_004396</u>    | 8 | 3286  | AACAUUCA | 3279  | 3 UTR | 0.0047 | 1 |
| <u>DDX5</u>    | <u>NM_004396</u>    | 7 | 3285  | ACAUCA   | 3279  | 3 UTR | 0.0187 | 2 |
| <u>DDX5</u>    | <u>NM_004396</u>    | 7 | 3022  | ACAUCA   | 3016  | 3 UTR | 0.0187 | 2 |
| <u>DDX52</u>   | <u>NM_152300</u>    | 9 | 3091  | AACAUCAA | 3083  | 3 UTR | 0.0073 | 1 |
| <u>DDX52</u>   | <u>NM_152300</u>    | 8 | 2012  | AACAUUCA | 2005  | 3 UTR | 0.0290 | 1 |
| <u>DDX52</u>   | <u>NM_152300</u>    | 8 | 3090  | ACAUCAA  | 3083  | 3 UTR | 0.0290 | 2 |



|                |                     |    |      |            |      |       |        |   |
|----------------|---------------------|----|------|------------|------|-------|--------|---|
| <u>DDX52</u>   | <u>NM_152300</u>    | 9  | 3091 | AACAUUCAA  | 3083 | 3 UTR | 0.0073 | 1 |
| <u>DDX52</u>   | <u>NM_152300</u>    | 8  | 2012 | AACAUUCA   | 2005 | 3 UTR | 0.0290 | 1 |
| <u>DDX52</u>   | <u>NM_152300</u>    | 8  | 3090 | ACAUUCAA   | 3083 | 3 UTR | 0.0290 | 2 |
| <u>DDX55</u>   | <u>NM_020936</u>    | 7  | 2435 | ACAUUCA    | 2429 | 3 UTR | 0.0483 | 2 |
| <u>DDX55</u>   | <u>NM_020936</u>    | 7  | 2435 | ACAUUCA    | 2429 | 3 UTR | 0.0483 | 2 |
| <u>DDX60</u>   | <u>NM_017631</u>    | 7  | 5727 | AACAUUC    | 5721 | 3 UTR | 0.0391 | 1 |
| <u>DDX60</u>   | <u>NM_017631</u>    | 7  | 5727 | AACAUUC    | 5721 | 3 UTR | 0.0391 | 1 |
| <u>DDX60L</u>  | <u>NM_001012967</u> | 8  | 6647 | ACAUUCAA   | 6640 | 3 UTR | 0.0213 | 2 |
| <u>DDX60L</u>  | <u>NM_001012967</u> | 8  | 6647 | ACAUUCAA   | 6640 | 3 UTR | 0.0213 | 2 |
| <u>Dec-01</u>  | <u>NM_017418</u>    | 8  | 736  | ACAUUCAA   | 729  | 3 UTR | 0.0079 | 2 |
| <u>Dec-01</u>  | <u>NM_017418</u>    | 8  | 736  | ACAUUCAA   | 729  | 3 UTR | 0.0079 | 2 |
| <u>DENND1A</u> | <u>NM_020946</u>    | 9  | 4382 | AACAUUCAA  | 4374 | 3 UTR | 0.0068 | 1 |
| <u>DENND1A</u> | <u>NM_020946</u>    | 8  | 4381 | ACAUUCAA   | 4374 | 3 UTR | 0.0268 | 2 |
| <u>DENND1A</u> | <u>NM_020946</u>    | 9  | 4382 | AACAUUCAA  | 4374 | 3 UTR | 0.0068 | 1 |
| <u>DENND1A</u> | <u>NM_020946</u>    | 8  | 4381 | ACAUUCAA   | 4374 | 3 UTR | 0.0268 | 2 |
| <u>DENND4C</u> | <u>NM_017925</u>    | 8  | 5241 | ACAUUCAA   | 5234 | 3 UTR | 0.0296 | 2 |
| <u>DENND4C</u> | <u>NM_017925</u>    | 8  | 5241 | ACAUUCAA   | 5234 | 3 UTR | 0.0296 | 2 |
| <u>DEPDC5</u>  | <u>NM_014662</u>    | 7  | 5185 | ACAUUCA    | 5179 | 3 UTR | 0.0320 | 2 |
| <u>DEPDC5</u>  | <u>NM_014662</u>    | 7  | 5185 | ACAUUCA    | 5179 | 3 UTR | 0.0320 | 2 |
| <u>DEPDC6</u>  | <u>NM_022783</u>    | 10 | 2180 | AACAUUCAAC | 2171 | 3 UTR | 0.0012 | 1 |
| <u>DEPDC6</u>  | <u>NM_022783</u>    | 9  | 2179 | ACAUUCAAC  | 2171 | 3 UTR | 0.0046 | 2 |
| <u>DEPDC6</u>  | <u>NM_022783</u>    | 10 | 2180 | AACAUUCAAC | 2171 | 3 UTR | 0.0012 | 1 |
| <u>DEPDC6</u>  | <u>NM_022783</u>    | 9  | 2179 | ACAUUCAAC  | 2171 | 3 UTR | 0.0046 | 2 |
| <u>DGCR2</u>   | <u>NM_005137</u>    | 10 | 3129 | ACAUUCAACG | 3120 | 3 UTR | 0.0025 | 2 |
| <u>DGCR2</u>   | <u>NM_005137</u>    | 10 | 3129 | ACAUUCAACG | 3120 | 3 UTR | 0.0025 | 2 |
| <u>DGKE</u>    | <u>NM_003647</u>    | 7  | 7200 | AACAUUC    | 7194 | 3 UTR | 0.0460 | 1 |
| <u>DGKE</u>    | <u>NM_003647</u>    | 7  | 7200 | AACAUUC    | 7194 | 3 UTR | 0.0460 | 1 |
| <u>DGKH</u>    | <u>NM_178009</u>    | 7  | 4028 | AACAUUC    | 4022 | 3 UTR | 0.0338 | 1 |
| <u>DGKH</u>    | <u>NM_178009</u>    | 8  | 4156 | ACAUUCAA   | 4149 | 3 UTR | 0.0086 | 2 |
| <u>DGKH</u>    | <u>NM_178009</u>    | 7  | 4028 | AACAUUC    | 4022 | 3 UTR | 0.0338 | 1 |
| <u>DGKH</u>    | <u>NM_178009</u>    | 8  | 4156 | ACAUUCAA   | 4149 | 3 UTR | 0.0086 | 2 |
| <u>DHRS9</u>   | <u>NM_005771</u>    | 8  | 2820 | AACAUUCA   | 2813 | 3 UTR | 0.0064 | 1 |
| <u>DHRS9</u>   | <u>NM_005771</u>    | 7  | 2819 | ACAUUCA    | 2813 | 3 UTR | 0.0252 | 2 |
| <u>DHRS9</u>   | <u>NM_005771</u>    | 8  | 2820 | AACAUUCA   | 2813 | 3 UTR | 0.0064 | 1 |
| <u>DHRS9</u>   | <u>NM_005771</u>    | 7  | 2819 | ACAUUCA    | 2813 | 3 UTR | 0.0252 | 2 |
| <u>DHX29</u>   | <u>NM_019030</u>    | 7  | 4432 | ACAUUCA    | 4426 | 3 UTR | 0.0158 | 2 |
| <u>DHX29</u>   | <u>NM_019030</u>    | 7  | 4432 | ACAUUCA    | 4426 | 3 UTR | 0.0158 | 2 |
| <u>DHX33</u>   | <u>NM_020162</u>    | 8  | 2540 | AACAUUCA   | 2533 | 3 UTR | 0.0293 | 1 |

|                |                  |    |       |            |       |       |        |   |
|----------------|------------------|----|-------|------------|-------|-------|--------|---|
| <u>DHX33</u>   | <u>NM_020162</u> | 8  | 2540  | AACAUUCA   | 2533  | 3 UTR | 0.0293 | 1 |
| <u>DHX57</u>   | <u>NM_198963</u> | 7  | 4563  | ACAUUCA    | 4557  | 3 UTR | 0.0351 | 2 |
| <u>DHX57</u>   | <u>NM_198963</u> | 7  | 4563  | ACAUUCA    | 4557  | 3 UTR | 0.0351 | 2 |
| <u>DIP2C</u>   | <u>NM_014974</u> | 10 | 7427  | AACAUUCAAC | 7418  | 3 UTR | 0.0030 | 1 |
| <u>DIP2C</u>   | <u>NM_014974</u> | 9  | 7426  | ACAUUCAAC  | 7418  | 3 UTR | 0.0119 | 2 |
| <u>DIP2C</u>   | <u>NM_014974</u> | 10 | 7427  | AACAUUCAAC | 7418  | 3 UTR | 0.0030 | 1 |
| <u>DIP2C</u>   | <u>NM_014974</u> | 9  | 7426  | ACAUUCAAC  | 7418  | 3 UTR | 0.0119 | 2 |
| <u>DIRAS3</u>  | <u>NM_004675</u> | 7  | 1246  | ACAUUCA    | 1240  | 3 UTR | 0.0393 | 2 |
| <u>DIRAS3</u>  | <u>NM_004675</u> | 7  | 1246  | ACAUUCA    | 1240  | 3 UTR | 0.0393 | 2 |
| <u>DKC1</u>    | <u>NM_001363</u> | 7  | 2432  | AACAUUC    | 2426  | 3 UTR | 0.0493 | 1 |
| <u>DKC1</u>    | <u>NM_001363</u> | 7  | 2432  | AACAUUC    | 2426  | 3 UTR | 0.0493 | 1 |
| <u>DMGDH</u>   | <u>NM_013391</u> | 8  | 2837  | AACAUUCA   | 2830  | 3 UTR | 0.0076 | 1 |
| <u>DMGDH</u>   | <u>NM_013391</u> | 7  | 2836  | ACAUUCA    | 2830  | 3 UTR | 0.0299 | 2 |
| <u>DMGDH</u>   | <u>NM_013391</u> | 8  | 2837  | AACAUUCA   | 2830  | 3 UTR | 0.0076 | 1 |
| <u>DMGDH</u>   | <u>NM_013391</u> | 7  | 2836  | ACAUUCA    | 2830  | 3 UTR | 0.0299 | 2 |
| <u>DMRT3</u>   | <u>NM_021240</u> | 8  | 1678  | AACAUUCA   | 1671  | 3 UTR | 0.0110 | 1 |
| <u>DMRT3</u>   | <u>NM_021240</u> | 7  | 1677  | ACAUUCA    | 1671  | 3 UTR | 0.0434 | 2 |
| <u>DMRT3</u>   | <u>NM_021240</u> | 8  | 1678  | AACAUUCA   | 1671  | 3 UTR | 0.0110 | 1 |
| <u>DMRT3</u>   | <u>NM_021240</u> | 7  | 1677  | ACAUUCA    | 1671  | 3 UTR | 0.0434 | 2 |
| <u>DMXL2</u>   | <u>NM_015263</u> | 8  | 10181 | AACAUUCA   | 10174 | 3 UTR | 0.0188 | 1 |
| <u>DMXL2</u>   | <u>NM_015263</u> | 8  | 10181 | AACAUUCA   | 10174 | 3 UTR | 0.0188 | 1 |
| <u>DNAH8</u>   | <u>NM_001371</u> | 8  | 14274 | AACAUUCA   | 14267 | 3 UTR | 0.0061 | 1 |
| <u>DNAH8</u>   | <u>NM_001371</u> | 7  | 14273 | ACAUUCA    | 14267 | 3 UTR | 0.0241 | 2 |
| <u>DNAH8</u>   | <u>NM_001371</u> | 8  | 14274 | AACAUUCA   | 14267 | 3 UTR | 0.0061 | 1 |
| <u>DNAH8</u>   | <u>NM_001371</u> | 7  | 14273 | ACAUUCA    | 14267 | 3 UTR | 0.0241 | 2 |
| <u>DNAJB1</u>  | <u>NM_006145</u> | 8  | 1190  | AACAUUCA   | 1183  | 3 UTR | 0.0177 | 1 |
| <u>DNAJB1</u>  | <u>NM_006145</u> | 8  | 1190  | AACAUUCA   | 1183  | 3 UTR | 0.0177 | 1 |
| <u>DNAJC13</u> | <u>NM_015268</u> | 8  | 7474  | ACAUUCAA   | 7467  | 3 UTR | 0.0114 | 2 |
| <u>DNAJC13</u> | <u>NM_015268</u> | 8  | 7474  | ACAUUCAA   | 7467  | 3 UTR | 0.0114 | 2 |
| <u>DNAJC3</u>  | <u>NM_006260</u> | 9  | 5051  | ACAUUCAAC  | 5043  | 3 UTR | 0.0000 | 2 |
| <u>DNAJC3</u>  | <u>NM_006260</u> | 9  | 5051  | ACAUUCAAC  | 5043  | 3 UTR | 0.0000 | 2 |
| <u>DNAJC7</u>  | <u>NM_003315</u> | 8  | 1781  | ACAUUCAA   | 1774  | 3 UTR | 0.0042 | 2 |
| <u>DNAJC7</u>  | <u>NM_003315</u> | 8  | 1781  | ACAUUCAA   | 1774  | 3 UTR | 0.0042 | 2 |
| <u>DNHD1</u>   | <u>NM_144666</u> | 7  | 12534 | ACAUUCA    | 12528 | 3 UTR | 0.0020 | 2 |
| <u>DNHD1</u>   | <u>NM_144666</u> | 7  | 11804 | ACAUUCA    | 11798 | 3 UTR | 0.0020 | 2 |
| <u>DNHD1</u>   | <u>NM_144666</u> | 7  | 12534 | ACAUUCA    | 12528 | 3 UTR | 0.0020 | 2 |
| <u>DNHD1</u>   | <u>NM_144666</u> | 7  | 11804 | ACAUUCA    | 11798 | 3 UTR | 0.0020 | 2 |
| <u>DOCK10</u>  | <u>NM_014689</u> | 8  | 7132  | AACAUUCA   | 7125  | 3 UTR | 0.0096 | 1 |

|                 |                     |   |       |           |       |       |        |   |
|-----------------|---------------------|---|-------|-----------|-------|-------|--------|---|
| <u>DOCK10</u>   | <u>NM_014689</u>    | 8 | 7132  | AACAUUCA  | 7125  | 3 UTR | 0.0096 | 1 |
| <u>DOCK4</u>    | <u>NM_014705</u>    | 8 | 7807  | ACAUUCAA  | 7800  | 3 UTR | 0.0326 | 2 |
| <u>DOCK4</u>    | <u>NM_014705</u>    | 8 | 7807  | ACAUUCAA  | 7800  | 3 UTR | 0.0326 | 2 |
| <u>DOCK7</u>    | <u>NM_033407</u>    | 8 | 6759  | AACAUUCA  | 6752  | 3 UTR | 0.0106 | 1 |
| <u>DOCK7</u>    | <u>NM_033407</u>    | 7 | 6758  | ACAUUCA   | 6752  | 3 UTR | 0.0418 | 2 |
| <u>DOCK7</u>    | <u>NM_033407</u>    | 8 | 6759  | AACAUUCA  | 6752  | 3 UTR | 0.0106 | 1 |
| <u>DOCK7</u>    | <u>NM_033407</u>    | 7 | 6758  | ACAUUCA   | 6752  | 3 UTR | 0.0418 | 2 |
| <u>DOK6</u>     | <u>NM_152721</u>    | 7 | 6166  | AACAUUC   | 6160  | 3 UTR | 0.0461 | 1 |
| <u>DOK6</u>     | <u>NM_152721</u>    | 7 | 6166  | AACAUUC   | 6160  | 3 UTR | 0.0461 | 1 |
| <u>DOPEY1</u>   | <u>NM_015018</u>    | 7 | 7818  | ACAUUCA   | 7812  | 3 UTR | 0.0157 | 2 |
| <u>DOPEY1</u>   | <u>NM_015018</u>    | 7 | 7818  | ACAUUCA   | 7812  | 3 UTR | 0.0157 | 2 |
| <u>DOPEY2</u>   | <u>NM_005128</u>    | 7 | 7664  | AACAUUC   | 7658  | 3 UTR | 0.0426 | 1 |
| <u>DOPEY2</u>   | <u>NM_005128</u>    | 7 | 7664  | AACAUUC   | 7658  | 3 UTR | 0.0426 | 1 |
| <u>DPH3</u>     | <u>NM_001047434</u> | 7 | 1095  | AACAUUC   | 1089  | 3 UTR | 0.0185 | 1 |
| <u>DPH3</u>     | <u>NM_001047434</u> | 7 | 1095  | AACAUUC   | 1089  | 3 UTR | 0.0185 | 1 |
| <u>DPP10</u>    | <u>NM_020868</u>    | 8 | 4822  | ACAUUCAA  | 4815  | 3 UTR | 0.0303 | 2 |
| <u>DPP10</u>    | <u>NM_020868</u>    | 8 | 4822  | ACAUUCAA  | 4815  | 3 UTR | 0.0303 | 2 |
| <u>DPY19L1</u>  | <u>NM_015283</u>    | 8 | 2316  | ACAUUCAA  | 2309  | 3 UTR | 0.0404 | 2 |
| <u>DPY19L1</u>  | <u>NM_015283</u>    | 8 | 2316  | ACAUUCAA  | 2309  | 3 UTR | 0.0404 | 2 |
| <u>DPY19L2</u>  | <u>NM_173812</u>    | 8 | 2638  | ACAUUCAA  | 2631  | 3 UTR | 0.0242 | 2 |
| <u>DPY19L2</u>  | <u>NM_173812</u>    | 8 | 2638  | ACAUUCAA  | 2631  | 3 UTR | 0.0242 | 2 |
| <u>DR1</u>      | <u>NM_001938</u>    | 8 | 2838  | AACAUUCA  | 2831  | 3 UTR | 0.0296 | 1 |
| <u>DR1</u>      | <u>NM_001938</u>    | 8 | 2838  | AACAUUCA  | 2831  | 3 UTR | 0.0296 | 1 |
| <u>DSE</u>      | <u>NM_013352</u>    | 8 | 3926  | AACAUUCA  | 3919  | 3 UTR | 0.0147 | 1 |
| <u>DSE</u>      | <u>NM_013352</u>    | 8 | 3926  | AACAUUCA  | 3919  | 3 UTR | 0.0147 | 1 |
| <u>DYNC1LI2</u> | <u>NM_006141</u>    | 8 | 2943  | AACAUUCA  | 2936  | 3 UTR | 0.0424 | 1 |
| <u>DYNC1LI2</u> | <u>NM_006141</u>    | 8 | 2641  | AACAUUCA  | 2634  | 3 UTR | 0.0424 | 1 |
| <u>DYNC1LI2</u> | <u>NM_006141</u>    | 8 | 1991  | AACAUUCA  | 1984  | 3 UTR | 0.0424 | 1 |
| <u>DYNC1LI2</u> | <u>NM_006141</u>    | 8 | 2943  | AACAUUCA  | 2936  | 3 UTR | 0.0424 | 1 |
| <u>DYNC1LI2</u> | <u>NM_006141</u>    | 8 | 2641  | AACAUUCA  | 2634  | 3 UTR | 0.0424 | 1 |
| <u>DYNC1LI2</u> | <u>NM_006141</u>    | 8 | 1991  | AACAUUCA  | 1984  | 3 UTR | 0.0424 | 1 |
| <u>DYNC2H1</u>  | <u>NM_001080463</u> | 7 | 13523 | ACAUUCA   | 13517 | 3 UTR | 0.0365 | 2 |
| <u>DYNC2H1</u>  | <u>NM_001080463</u> | 7 | 13523 | ACAUUCA   | 13517 | 3 UTR | 0.0365 | 2 |
| <u>DYNLRB1</u>  | <u>NM_014183</u>    | 7 | 406   | AACAUUC   | 400   | 3 UTR | 0.0212 | 1 |
| <u>DYNLRB1</u>  | <u>NM_014183</u>    | 7 | 406   | AACAUUC   | 400   | 3 UTR | 0.0212 | 1 |
| <u>DYRK2</u>    | <u>NM_006482</u>    | 9 | 5940  | ACAUUCAAC | 5932  | 3 UTR | 0.0150 | 2 |
| <u>DYRK2</u>    | <u>NM_006482</u>    | 9 | 5940  | ACAUUCAAC | 5932  | 3 UTR | 0.0150 | 2 |
| <u>E2F5</u>     | <u>NM_001951</u>    | 7 | 1167  | ACAUUCA   | 1161  | 3 UTR | 0.0398 | 2 |

|                |                     |   |      |          |      |       |        |   |
|----------------|---------------------|---|------|----------|------|-------|--------|---|
| <u>E2F5</u>    | <u>NM_001951</u>    | 7 | 1167 | ACAUUCA  | 1161 | 3 UTR | 0.0398 | 2 |
| <u>EDG1</u>    | <u>NM_001400</u>    | 8 | 2750 | ACAUUCA  | 2743 | 3 UTR | 0.0209 | 2 |
| <u>EDG1</u>    | <u>NM_001400</u>    | 8 | 2688 | ACAUUCA  | 2681 | 3 UTR | 0.0209 | 2 |
| <u>EDG1</u>    | <u>NM_001400</u>    | 8 | 2750 | ACAUUCA  | 2743 | 3 UTR | 0.0209 | 2 |
| <u>EDG1</u>    | <u>NM_001400</u>    | 8 | 2688 | ACAUUCA  | 2681 | 3 UTR | 0.0209 | 2 |
| <u>EDNRA</u>   | <u>NM_001957</u>    | 8 | 2339 | AACAUUCA | 2332 | 3 UTR | 0.0353 | 1 |
| <u>EDNRA</u>   | <u>NM_001957</u>    | 8 | 2339 | AACAUUCA | 2332 | 3 UTR | 0.0353 | 1 |
| <u>EDNRB</u>   | <u>NM_001122659</u> | 8 | 3285 | ACAUUCA  | 3278 | 3 UTR | 0.0408 | 2 |
| <u>EDNRB</u>   | <u>NM_001122659</u> | 8 | 3285 | ACAUUCA  | 3278 | 3 UTR | 0.0408 | 2 |
| <u>EED</u>     | <u>NM_152991</u>    | 7 | 2321 | ACAUUCA  | 2315 | 3 UTR | 0.0449 | 2 |
| <u>EED</u>     | <u>NM_152991</u>    | 7 | 2321 | ACAUUCA  | 2315 | 3 UTR | 0.0449 | 2 |
| <u>EEF1E1</u>  | <u>NM_004280</u>    | 8 | 750  | AACAUUCA | 743  | 3 UTR | 0.0077 | 1 |
| <u>EEF1E1</u>  | <u>NM_004280</u>    | 7 | 749  | ACAUUCA  | 743  | 3 UTR | 0.0303 | 2 |
| <u>EEF1E1</u>  | <u>NM_004280</u>    | 8 | 750  | AACAUUCA | 743  | 3 UTR | 0.0077 | 1 |
| <u>EEF1E1</u>  | <u>NM_004280</u>    | 7 | 749  | ACAUUCA  | 743  | 3 UTR | 0.0303 | 2 |
| <u>EFHA2</u>   | <u>NM_181723</u>    | 8 | 3293 | AACAUUCA | 3286 | 3 UTR | 0.0355 | 1 |
| <u>EFHA2</u>   | <u>NM_181723</u>    | 8 | 3293 | AACAUUCA | 3286 | 3 UTR | 0.0355 | 1 |
| <u>EFS</u>     | <u>NM_005864</u>    | 7 | 3052 | ACAUUCA  | 3046 | 3 UTR | 0.0499 | 2 |
| <u>EFS</u>     | <u>NM_005864</u>    | 7 | 3052 | ACAUUCA  | 3046 | 3 UTR | 0.0499 | 2 |
| <u>EGFL6</u>   | <u>NM_015507</u>    | 8 | 1907 | AACAUUCA | 1900 | 3 UTR | 0.0075 | 1 |
| <u>EGFL6</u>   | <u>NM_015507</u>    | 7 | 1906 | ACAUUCA  | 1900 | 3 UTR | 0.0298 | 2 |
| <u>EGFL6</u>   | <u>NM_015507</u>    | 8 | 1907 | AACAUUCA | 1900 | 3 UTR | 0.0075 | 1 |
| <u>EGFL6</u>   | <u>NM_015507</u>    | 7 | 1906 | ACAUUCA  | 1900 | 3 UTR | 0.0298 | 2 |
| <u>EGLN1</u>   | <u>NM_022051</u>    | 9 | 6285 | AACAUUCA | 6277 | 3 UTR | 0.0028 | 1 |
| <u>EGLN1</u>   | <u>NM_022051</u>    | 8 | 6284 | ACAUUCA  | 6277 | 3 UTR | 0.0110 | 2 |
| <u>EGLN1</u>   | <u>NM_022051</u>    | 9 | 6285 | AACAUUCA | 6277 | 3 UTR | 0.0028 | 1 |
| <u>EGLN1</u>   | <u>NM_022051</u>    | 8 | 6284 | ACAUUCA  | 6277 | 3 UTR | 0.0110 | 2 |
| <u>EHF</u>     | <u>NM_012153</u>    | 9 | 2728 | AACAUUCA | 2720 | 3 UTR | 0.0099 | 1 |
| <u>EHF</u>     | <u>NM_012153</u>    | 8 | 2727 | ACAUUCA  | 2720 | 3 UTR | 0.0389 | 2 |
| <u>EHF</u>     | <u>NM_012153</u>    | 9 | 2728 | AACAUUCA | 2720 | 3 UTR | 0.0099 | 1 |
| <u>EHF</u>     | <u>NM_012153</u>    | 8 | 2727 | ACAUUCA  | 2720 | 3 UTR | 0.0389 | 2 |
| <u>EIF1</u>    | <u>NM_005801</u>    | 7 | 865  | AACAUUC  | 859  | 3 UTR | 0.0488 | 1 |
| <u>EIF1</u>    | <u>NM_005801</u>    | 7 | 865  | AACAUUC  | 859  | 3 UTR | 0.0488 | 1 |
| <u>EIF2AK1</u> | <u>NM_014413</u>    | 8 | 3941 | ACAUUCA  | 3934 | 3 UTR | 0.0363 | 2 |
| <u>EIF2AK1</u> | <u>NM_014413</u>    | 8 | 3941 | ACAUUCA  | 3934 | 3 UTR | 0.0363 | 2 |
| <u>EIF2AK4</u> | <u>NM_001013703</u> | 7 | 5065 | AACAUUC  | 5059 | 3 UTR | 0.0319 | 1 |
| <u>EIF2AK4</u> | <u>NM_001013703</u> | 7 | 5065 | AACAUUC  | 5059 | 3 UTR | 0.0319 | 1 |
| <u>EIF2S3</u>  | <u>NM_001415</u>    | 8 | 3315 | AACAUUCA | 3308 | 3 UTR | 0.0307 | 1 |

|               |                  |    |      |            |      |       |        |   |
|---------------|------------------|----|------|------------|------|-------|--------|---|
| <u>EIF2S3</u> | <u>NM_001415</u> | 8  | 3315 | AACAUUCA   | 3308 | 3 UTR | 0.0307 | 1 |
| <u>EIF4A2</u> | <u>NM_001967</u> | 9  | 1866 | AACAUUCA   | 1858 | 3 UTR | 0.0024 | 1 |
| <u>EIF4A2</u> | <u>NM_001967</u> | 8  | 1865 | ACAUUCA    | 1858 | 3 UTR | 0.0097 | 2 |
| <u>EIF4A2</u> | <u>NM_001967</u> | 9  | 1866 | AACAUUCA   | 1858 | 3 UTR | 0.0024 | 1 |
| <u>EIF4A2</u> | <u>NM_001967</u> | 8  | 1865 | ACAUUCA    | 1858 | 3 UTR | 0.0097 | 2 |
| <u>ELAVL2</u> | <u>NM_004432</u> | 9  | 2693 | AACAUUCA   | 2685 | 3 UTR | 0.0093 | 1 |
| <u>ELAVL2</u> | <u>NM_004432</u> | 8  | 2692 | ACAUUCA    | 2685 | 3 UTR | 0.0367 | 2 |
| <u>ELAVL2</u> | <u>NM_004432</u> | 9  | 2693 | AACAUUCA   | 2685 | 3 UTR | 0.0093 | 1 |
| <u>ELAVL2</u> | <u>NM_004432</u> | 8  | 2692 | ACAUUCA    | 2685 | 3 UTR | 0.0367 | 2 |
| <u>ELAVL4</u> | <u>NM_021952</u> | 9  | 1664 | AACAUUCA   | 1656 | 3 UTR | 0.0009 | 1 |
| <u>ELAVL4</u> | <u>NM_021952</u> | 8  | 1663 | ACAUUCA    | 1656 | 3 UTR | 0.0034 | 2 |
| <u>ELAVL4</u> | <u>NM_021952</u> | 9  | 1664 | AACAUUCA   | 1656 | 3 UTR | 0.0009 | 1 |
| <u>ELAVL4</u> | <u>NM_021952</u> | 8  | 1663 | ACAUUCA    | 1656 | 3 UTR | 0.0034 | 2 |
| <u>EN1</u>    | <u>NM_001426</u> | 8  | 2679 | ACAUUCA    | 2672 | 3 UTR | 0.0116 | 2 |
| <u>EN1</u>    | <u>NM_001426</u> | 8  | 2679 | ACAUUCA    | 2672 | 3 UTR | 0.0116 | 2 |
| <u>EN2</u>    | <u>NM_001427</u> | 8  | 3282 | AACAUUCA   | 3275 | 3 UTR | 0.0323 | 1 |
| <u>EN2</u>    | <u>NM_001427</u> | 8  | 3282 | AACAUUCA   | 3275 | 3 UTR | 0.0323 | 1 |
| <u>ENDOD1</u> | <u>NM_015036</u> | 9  | 4243 | AACAUUCA   | 4235 | 3 UTR | 0.0117 | 1 |
| <u>ENDOD1</u> | <u>NM_015036</u> | 8  | 2910 | AACAUUCA   | 2903 | 3 UTR | 0.0458 | 1 |
| <u>ENDOD1</u> | <u>NM_015036</u> | 8  | 4242 | ACAUUCA    | 4235 | 3 UTR | 0.0458 | 2 |
| <u>ENDOD1</u> | <u>NM_015036</u> | 9  | 4243 | AACAUUCA   | 4235 | 3 UTR | 0.0117 | 1 |
| <u>ENDOD1</u> | <u>NM_015036</u> | 8  | 2910 | AACAUUCA   | 2903 | 3 UTR | 0.0458 | 1 |
| <u>ENDOD1</u> | <u>NM_015036</u> | 8  | 4242 | ACAUUCA    | 4235 | 3 UTR | 0.0458 | 2 |
| <u>ENOX2</u>  | <u>NM_182314</u> | 8  | 3223 | AACAUUCA   | 3216 | 3 UTR | 0.0291 | 1 |
| <u>ENOX2</u>  | <u>NM_182314</u> | 8  | 3223 | AACAUUCA   | 3216 | 3 UTR | 0.0291 | 1 |
| <u>EPC2</u>   | <u>NM_015630</u> | 8  | 3109 | ACAUUCA    | 3102 | 3 UTR | 0.0180 | 2 |
| <u>EPC2</u>   | <u>NM_015630</u> | 8  | 3109 | ACAUUCA    | 3102 | 3 UTR | 0.0180 | 2 |
| <u>EPDR1</u>  | <u>NM_017549</u> | 9  | 2297 | ACAUUCAAC  | 2289 | 3 UTR | 0.0059 | 2 |
| <u>EPDR1</u>  | <u>NM_017549</u> | 9  | 2297 | ACAUUCAAC  | 2289 | 3 UTR | 0.0059 | 2 |
| <u>EPHA4</u>  | <u>NM_004438</u> | 8  | 4481 | AACAUUCA   | 4474 | 3 UTR | 0.0500 | 1 |
| <u>EPHA4</u>  | <u>NM_004438</u> | 8  | 4481 | AACAUUCA   | 4474 | 3 UTR | 0.0500 | 1 |
| <u>EPS8</u>   | <u>NM_004447</u> | 8  | 3717 | AACAUUCA   | 3710 | 3 UTR | 0.0179 | 1 |
| <u>EPS8</u>   | <u>NM_004447</u> | 8  | 3717 | AACAUUCA   | 3710 | 3 UTR | 0.0179 | 1 |
| <u>ERAP2</u>  | <u>NM_022350</u> | 8  | 4804 | ACAUUCA    | 4797 | 3 UTR | 0.0315 | 2 |
| <u>ERAP2</u>  | <u>NM_022350</u> | 8  | 4804 | ACAUUCA    | 4797 | 3 UTR | 0.0315 | 2 |
| <u>ERC2</u>   | <u>NM_015576</u> | 8  | 3453 | ACAUUCA    | 3446 | 3 UTR | 0.0449 | 2 |
| <u>ERC2</u>   | <u>NM_015576</u> | 8  | 3453 | ACAUUCA    | 3446 | 3 UTR | 0.0449 | 2 |
| <u>ERLIN2</u> | <u>NM_007175</u> | 10 | 3913 | AACAUUCAAC | 3904 | 3 UTR | 0.0035 | 1 |

|                |                     |    |      |            |      |       |        |   |
|----------------|---------------------|----|------|------------|------|-------|--------|---|
| <u>ERLIN2</u>  | <u>NM_007175</u>    | 9  | 3912 | ACAUUCAAC  | 3904 | 3 UTR | 0.0140 | 2 |
| <u>ERLIN2</u>  | <u>NM_007175</u>    | 10 | 3913 | AACAUUCAAC | 3904 | 3 UTR | 0.0035 | 1 |
| <u>ERLIN2</u>  | <u>NM_007175</u>    | 9  | 3912 | ACAUUCAAC  | 3904 | 3 UTR | 0.0140 | 2 |
| <u>ERMAP</u>   | <u>NM_001017922</u> | 9  | 3282 | AACAUUCA   | 3274 | 3 UTR | 0.0068 | 1 |
| <u>ERMAP</u>   | <u>NM_001017922</u> | 8  | 3281 | ACAUUC     | 3274 | 3 UTR | 0.0269 | 2 |
| <u>ERMAP</u>   | <u>NM_001017922</u> | 9  | 3282 | AACAUUCA   | 3274 | 3 UTR | 0.0068 | 1 |
| <u>ERMAP</u>   | <u>NM_001017922</u> | 8  | 3281 | ACAUUC     | 3274 | 3 UTR | 0.0269 | 2 |
| <u>ESCO2</u>   | <u>NM_001017420</u> | 8  | 2143 | AACAUUCA   | 2136 | 3 UTR | 0.0224 | 1 |
| <u>ESCO2</u>   | <u>NM_001017420</u> | 8  | 2143 | AACAUUCA   | 2136 | 3 UTR | 0.0224 | 1 |
| <u>ESM1</u>    | <u>NM_007036</u>    | 8  | 2014 | ACAUUC     | 2007 | 3 UTR | 0.0221 | 2 |
| <u>ESM1</u>    | <u>NM_007036</u>    | 8  | 2014 | ACAUUC     | 2007 | 3 UTR | 0.0221 | 2 |
| <u>ETF1</u>    | <u>NM_004730</u>    | 8  | 2448 | AACAUUCA   | 2441 | 3 UTR | 0.0335 | 1 |
| <u>ETF1</u>    | <u>NM_004730</u>    | 8  | 2448 | AACAUUCA   | 2441 | 3 UTR | 0.0335 | 1 |
| <u>EVI5</u>    | <u>NM_005665</u>    | 9  | 6205 | AACAUUCA   | 6197 | 3 UTR | 0.0187 | 1 |
| <u>EVI5</u>    | <u>NM_005665</u>    | 9  | 6205 | AACAUUCA   | 6197 | 3 UTR | 0.0187 | 1 |
| <u>EXDL1</u>   | <u>NM_152596</u>    | 10 | 2312 | AACAUUCAAC | 2303 | 3 UTR | 0.0012 | 1 |
| <u>EXDL1</u>   | <u>NM_152596</u>    | 9  | 2305 | AACAUUCA   | 2297 | 3 UTR | 0.0046 | 1 |
| <u>EXDL1</u>   | <u>NM_152596</u>    | 9  | 2311 | ACAUUCAAC  | 2303 | 3 UTR | 0.0046 | 2 |
| <u>EXDL1</u>   | <u>NM_152596</u>    | 8  | 2304 | ACAUUC     | 2297 | 3 UTR | 0.0183 | 2 |
| <u>EXDL1</u>   | <u>NM_152596</u>    | 10 | 2312 | AACAUUCAAC | 2303 | 3 UTR | 0.0012 | 1 |
| <u>EXDL1</u>   | <u>NM_152596</u>    | 9  | 2305 | AACAUUCA   | 2297 | 3 UTR | 0.0046 | 1 |
| <u>EXDL1</u>   | <u>NM_152596</u>    | 9  | 2311 | ACAUUCAAC  | 2303 | 3 UTR | 0.0046 | 2 |
| <u>EXDL1</u>   | <u>NM_152596</u>    | 8  | 2304 | ACAUUC     | 2297 | 3 UTR | 0.0183 | 2 |
| <u>EXOC2</u>   | <u>NM_018303</u>    | 8  | 4369 | AACAUUCA   | 4362 | 3 UTR | 0.0234 | 1 |
| <u>EXOC2</u>   | <u>NM_018303</u>    | 8  | 4369 | AACAUUCA   | 4362 | 3 UTR | 0.0234 | 1 |
| <u>EXOC8</u>   | <u>NM_175876</u>    | 8  | 4374 | ACAUUC     | 4367 | 3 UTR | 0.0423 | 2 |
| <u>EXOC8</u>   | <u>NM_175876</u>    | 8  | 4374 | ACAUUC     | 4367 | 3 UTR | 0.0423 | 2 |
| <u>EXOSC2</u>  | <u>NM_014285</u>    | 8  | 1827 | AACAUUCA   | 1820 | 3 UTR | 0.0195 | 1 |
| <u>EXOSC2</u>  | <u>NM_014285</u>    | 8  | 1827 | AACAUUCA   | 1820 | 3 UTR | 0.0195 | 1 |
| <u>EXOSC3</u>  | <u>NM_016042</u>    | 7  | 952  | ACAUUC     | 946  | 3 UTR | 0.0222 | 2 |
| <u>EXOSC3</u>  | <u>NM_016042</u>    | 7  | 952  | ACAUUC     | 946  | 3 UTR | 0.0222 | 2 |
| <u>FAM100B</u> | <u>NM_182565</u>    | 7  | 1376 | ACAUUC     | 1370 | 3 UTR | 0.0472 | 2 |
| <u>FAM100B</u> | <u>NM_182565</u>    | 7  | 1376 | ACAUUC     | 1370 | 3 UTR | 0.0472 | 2 |
| <u>FAM102A</u> | <u>NM_001035254</u> | 8  | 2883 | AACAUUCA   | 2876 | 3 UTR | 0.0390 | 1 |
| <u>FAM102A</u> | <u>NM_001035254</u> | 8  | 2883 | AACAUUCA   | 2876 | 3 UTR | 0.0390 | 1 |
| <u>FAM104B</u> | <u>NM_138362</u>    | 7  | 695  | AACAUUC    | 689  | 3 UTR | 0.0421 | 1 |
| <u>FAM104B</u> | <u>NM_138362</u>    | 7  | 695  | AACAUUC    | 689  | 3 UTR | 0.0421 | 1 |
| <u>FAM105A</u> | <u>NM_019018</u>    | 7  | 5024 | AACAUUC    | 5018 | 3 UTR | 0.0466 | 1 |

|                |                     |   |      |          |      |       |        |   |
|----------------|---------------------|---|------|----------|------|-------|--------|---|
| <u>FAM105A</u> | <u>NM_019018</u>    | 8 | 4556 | ACAUCAA  | 4549 | 3 UTR | 0.0119 | 2 |
| <u>FAM105A</u> | <u>NM_019018</u>    | 7 | 5024 | AACAUUC  | 5018 | 3 UTR | 0.0466 | 1 |
| <u>FAM105A</u> | <u>NM_019018</u>    | 8 | 4556 | ACAUCAA  | 4549 | 3 UTR | 0.0119 | 2 |
| <u>FAM107B</u> | <u>NM_031453</u>    | 8 | 2167 | ACAUCAA  | 2160 | 3 UTR | 0.0393 | 2 |
| <u>FAM107B</u> | <u>NM_031453</u>    | 8 | 2167 | ACAUCAA  | 2160 | 3 UTR | 0.0393 | 2 |
| <u>FAM118B</u> | <u>NM_024556</u>    | 7 | 1390 | AACAUUC  | 1384 | 3 UTR | 0.0332 | 1 |
| <u>FAM118B</u> | <u>NM_024556</u>    | 7 | 1390 | AACAUUC  | 1384 | 3 UTR | 0.0332 | 1 |
| <u>FAM119B</u> | <u>NM_206914</u>    | 8 | 2480 | ACAUCAA  | 2473 | 3 UTR | 0.0342 | 2 |
| <u>FAM119B</u> | <u>NM_206914</u>    | 8 | 2480 | ACAUCAA  | 2473 | 3 UTR | 0.0342 | 2 |
| <u>FAM135A</u> | <u>NM_001105531</u> | 9 | 5192 | AACAUUCA | 5184 | 3 UTR | 0.0048 | 1 |
| <u>FAM135A</u> | <u>NM_001105531</u> | 8 | 5191 | ACAUCAA  | 5184 | 3 UTR | 0.0189 | 2 |
| <u>FAM135A</u> | <u>NM_001105531</u> | 9 | 5192 | AACAUUCA | 5184 | 3 UTR | 0.0048 | 1 |
| <u>FAM135A</u> | <u>NM_001105531</u> | 8 | 5191 | ACAUCAA  | 5184 | 3 UTR | 0.0189 | 2 |
| <u>FAM135B</u> | <u>NM_015912</u>    | 9 | 6023 | ACAUCAAC | 6015 | 3 UTR | 0.0098 | 2 |
| <u>FAM135B</u> | <u>NM_015912</u>    | 9 | 6023 | ACAUCAAC | 6015 | 3 UTR | 0.0098 | 2 |
| <u>FAM13A1</u> | <u>NM_014883</u>    | 8 | 4884 | AACAUUCA | 4877 | 3 UTR | 0.0386 | 1 |
| <u>FAM13A1</u> | <u>NM_014883</u>    | 8 | 4884 | AACAUUCA | 4877 | 3 UTR | 0.0386 | 1 |
| <u>FAM24A</u>  | <u>NM_001029888</u> | 7 | 498  | AACAUUC  | 492  | 3 UTR | 0.0095 | 1 |
| <u>FAM24A</u>  | <u>NM_001029888</u> | 7 | 498  | AACAUUC  | 492  | 3 UTR | 0.0095 | 1 |
| <u>FAM26D</u>  | <u>NM_153036</u>    | 8 | 1064 | AACAUUCA | 1057 | 3 UTR | 0.0100 | 1 |
| <u>FAM26D</u>  | <u>NM_153036</u>    | 7 | 1063 | ACAUCA   | 1057 | 3 UTR | 0.0393 | 2 |
| <u>FAM26D</u>  | <u>NM_153036</u>    | 8 | 1064 | AACAUUCA | 1057 | 3 UTR | 0.0100 | 1 |
| <u>FAM26D</u>  | <u>NM_153036</u>    | 7 | 1063 | ACAUCA   | 1057 | 3 UTR | 0.0393 | 2 |
| <u>FAM3B</u>   | <u>NM_058186</u>    | 7 | 1358 | ACAUCA   | 1352 | 3 UTR | 0.0318 | 2 |
| <u>FAM3B</u>   | <u>NM_058186</u>    | 7 | 1358 | ACAUCA   | 1352 | 3 UTR | 0.0318 | 2 |
| <u>FAM43A</u>  | <u>NM_153690</u>    | 8 | 2990 | AACAUUCA | 2983 | 3 UTR | 0.0148 | 1 |
| <u>FAM43A</u>  | <u>NM_153690</u>    | 8 | 2990 | AACAUUCA | 2983 | 3 UTR | 0.0148 | 1 |
| <u>FAM47B</u>  | <u>NM_152631</u>    | 7 | 2044 | ACAUCA   | 2038 | 3 UTR | 0.0090 | 2 |
| <u>FAM47B</u>  | <u>NM_152631</u>    | 7 | 2044 | ACAUCA   | 2038 | 3 UTR | 0.0090 | 2 |
| <u>FAM54B</u>  | <u>NM_019557</u>    | 8 | 1624 | AACAUUCA | 1617 | 3 UTR | 0.0141 | 1 |
| <u>FAM54B</u>  | <u>NM_019557</u>    | 8 | 1624 | AACAUUCA | 1617 | 3 UTR | 0.0141 | 1 |
| <u>FAM58A</u>  | <u>NM_152274</u>    | 7 | 1241 | ACAUCA   | 1235 | 3 UTR | 0.0276 | 2 |
| <u>FAM58A</u>  | <u>NM_152274</u>    | 7 | 1241 | ACAUCA   | 1235 | 3 UTR | 0.0276 | 2 |
| <u>FAM70A</u>  | <u>NM_017938</u>    | 8 | 2822 | AACAUUCA | 2815 | 3 UTR | 0.0335 | 1 |
| <u>FAM70A</u>  | <u>NM_017938</u>    | 8 | 2822 | AACAUUCA | 2815 | 3 UTR | 0.0335 | 1 |
| <u>FAM71C</u>  | <u>NM_153364</u>    | 7 | 1507 | ACAUCA   | 1501 | 3 UTR | 0.0397 | 2 |
| <u>FAM71C</u>  | <u>NM_153364</u>    | 7 | 1507 | ACAUCA   | 1501 | 3 UTR | 0.0397 | 2 |
| <u>FAM71D</u>  | <u>NM_173526</u>    | 7 | 1527 | ACAUCA   | 1521 | 3 UTR | 0.0140 | 2 |

|                |                     |   |      |           |      |       |        |   |
|----------------|---------------------|---|------|-----------|------|-------|--------|---|
| <u>FAM71D</u>  | <u>NM_173526</u>    | 7 | 1527 | ACAUUCA   | 1521 | 3 UTR | 0.0140 | 2 |
| <u>FAM84A</u>  | <u>NM_145175</u>    | 8 | 1976 | ACAUUCAA  | 1969 | 3 UTR | 0.0221 | 2 |
| <u>FAM84A</u>  | <u>NM_145175</u>    | 8 | 1976 | ACAUUCAA  | 1969 | 3 UTR | 0.0221 | 2 |
| <u>FANCM</u>   | <u>NM_020937</u>    | 8 | 6756 | AACAUUCA  | 6749 | 3 UTR | 0.0136 | 1 |
| <u>FANCM</u>   | <u>NM_020937</u>    | 8 | 6756 | AACAUUCA  | 6749 | 3 UTR | 0.0136 | 1 |
| <u>FASTKD1</u> | <u>NM_024622</u>    | 8 | 2953 | AACAUUCA  | 2946 | 3 UTR | 0.0013 | 1 |
| <u>FASTKD1</u> | <u>NM_024622</u>    | 7 | 2952 | ACAUUCA   | 2946 | 3 UTR | 0.0054 | 2 |
| <u>FASTKD1</u> | <u>NM_024622</u>    | 8 | 2953 | AACAUUCA  | 2946 | 3 UTR | 0.0013 | 1 |
| <u>FASTKD1</u> | <u>NM_024622</u>    | 7 | 2952 | ACAUUCA   | 2946 | 3 UTR | 0.0054 | 2 |
| <u>FBN2</u>    | <u>NM_001999</u>    | 9 | 9318 | AACAUUCAA | 9310 | 3 UTR | 0.0059 | 1 |
| <u>FBN2</u>    | <u>NM_001999</u>    | 8 | 9317 | ACAUUCAA  | 9310 | 3 UTR | 0.0233 | 2 |
| <u>FBN2</u>    | <u>NM_001999</u>    | 9 | 9318 | AACAUUCAA | 9310 | 3 UTR | 0.0059 | 1 |
| <u>FBN2</u>    | <u>NM_001999</u>    | 8 | 9317 | ACAUUCAA  | 9310 | 3 UTR | 0.0233 | 2 |
| <u>FBXL3</u>   | <u>NM_012158</u>    | 8 | 2157 | AACAUUCA  | 2150 | 3 UTR | 0.0286 | 1 |
| <u>FBXL3</u>   | <u>NM_012158</u>    | 8 | 2157 | AACAUUCA  | 2150 | 3 UTR | 0.0286 | 1 |
| <u>FBXO21</u>  | <u>NM_033624</u>    | 8 | 3019 | ACAUUCAA  | 3012 | 3 UTR | 0.0348 | 2 |
| <u>FBXO21</u>  | <u>NM_033624</u>    | 8 | 3019 | ACAUUCAA  | 3012 | 3 UTR | 0.0348 | 2 |
| <u>FBXO24</u>  | <u>NM_033506</u>    | 7 | 2173 | AACAUUC   | 2167 | 3 UTR | 0.0155 | 1 |
| <u>FBXO24</u>  | <u>NM_033506</u>    | 7 | 2173 | AACAUUC   | 2167 | 3 UTR | 0.0155 | 1 |
| <u>FBXO5</u>   | <u>NM_012177</u>    | 8 | 1490 | AACAUUCA  | 1483 | 3 UTR | 0.0100 | 1 |
| <u>FBXO5</u>   | <u>NM_012177</u>    | 7 | 1489 | ACAUUCA   | 1483 | 3 UTR | 0.0393 | 2 |
| <u>FBXO5</u>   | <u>NM_012177</u>    | 8 | 1490 | AACAUUCA  | 1483 | 3 UTR | 0.0100 | 1 |
| <u>FBXO5</u>   | <u>NM_012177</u>    | 7 | 1489 | ACAUUCA   | 1483 | 3 UTR | 0.0393 | 2 |
| <u>FBXW2</u>   | <u>NM_012164</u>    | 9 | 2183 | AACAUUCAA | 2175 | 3 UTR | 0.0285 | 1 |
| <u>FBXW2</u>   | <u>NM_012164</u>    | 9 | 2183 | AACAUUCAA | 2175 | 3 UTR | 0.0285 | 1 |
| <u>FCAMR</u>   | <u>NM_001122980</u> | 8 | 2446 | AACAUUCA  | 2439 | 3 UTR | 0.0069 | 1 |
| <u>FCAMR</u>   | <u>NM_001122980</u> | 7 | 2445 | ACAUUCA   | 2439 | 3 UTR | 0.0275 | 2 |
| <u>FCAMR</u>   | <u>NM_001122980</u> | 8 | 2446 | AACAUUCA  | 2439 | 3 UTR | 0.0069 | 1 |
| <u>FCAMR</u>   | <u>NM_001122980</u> | 7 | 2445 | ACAUUCA   | 2439 | 3 UTR | 0.0275 | 2 |
| <u>FDFT1</u>   | <u>NM_004462</u>    | 9 | 1775 | AACAUUCAA | 1767 | 3 UTR | 0.0027 | 1 |
| <u>FDFT1</u>   | <u>NM_004462</u>    | 8 | 1774 | ACAUUCAA  | 1767 | 3 UTR | 0.0108 | 2 |
| <u>FDFT1</u>   | <u>NM_004462</u>    | 9 | 1775 | AACAUUCAA | 1767 | 3 UTR | 0.0027 | 1 |
| <u>FDFT1</u>   | <u>NM_004462</u>    | 8 | 1774 | ACAUUCAA  | 1767 | 3 UTR | 0.0108 | 2 |
| <u>FGF7</u>    | <u>NM_002009</u>    | 8 | 3132 | AACAUUCA  | 3125 | 3 UTR | 0.0422 | 1 |
| <u>FGF7</u>    | <u>NM_002009</u>    | 8 | 3132 | AACAUUCA  | 3125 | 3 UTR | 0.0422 | 1 |
| <u>FHAD1</u>   | <u>NM_052929</u>    | 7 | 4584 | ACAUUCA   | 4578 | 3 UTR | 0.0426 | 2 |
| <u>FHAD1</u>   | <u>NM_052929</u>    | 7 | 4584 | ACAUUCA   | 4578 | 3 UTR | 0.0426 | 2 |
| <u>FIBCD1</u>  | <u>NM_032843</u>    | 8 | 1708 | AACAUUCA  | 1701 | 3 UTR | 0.0236 | 1 |



|                 |                     |   |      |           |      |       |        |   |
|-----------------|---------------------|---|------|-----------|------|-------|--------|---|
| <u>FIBCD1</u>   | <u>NM_032843</u>    | 8 | 1708 | AACAUUCA  | 1701 | 3 UTR | 0.0236 | 1 |
| <u>FIGN</u>     | <u>NM_018086</u>    | 8 | 2626 | AACAUUCA  | 2619 | 3 UTR | 0.0292 | 1 |
| <u>FIGN</u>     | <u>NM_018086</u>    | 8 | 4384 | ACAUUCA   | 4377 | 3 UTR | 0.0292 | 2 |
| <u>FIGN</u>     | <u>NM_018086</u>    | 8 | 3371 | ACAUUCA   | 3364 | 3 UTR | 0.0292 | 2 |
| <u>FIGN</u>     | <u>NM_018086</u>    | 8 | 2626 | AACAUUCA  | 2619 | 3 UTR | 0.0292 | 1 |
| <u>FIGN</u>     | <u>NM_018086</u>    | 8 | 4384 | ACAUUCA   | 4377 | 3 UTR | 0.0292 | 2 |
| <u>FIGN</u>     | <u>NM_018086</u>    | 8 | 3371 | ACAUUCA   | 3364 | 3 UTR | 0.0292 | 2 |
| <u>FKBP1A</u>   | <u>NM_000801</u>    | 9 | 1399 | AACAUUCA  | 1391 | 3 UTR | 0.0044 | 1 |
| <u>FKBP1A</u>   | <u>NM_000801</u>    | 8 | 1398 | ACAUUCA   | 1391 | 3 UTR | 0.0175 | 2 |
| <u>FKBP1A</u>   | <u>NM_000801</u>    | 9 | 1399 | AACAUUCA  | 1391 | 3 UTR | 0.0044 | 1 |
| <u>FKBP1A</u>   | <u>NM_000801</u>    | 8 | 1398 | ACAUUCA   | 1391 | 3 UTR | 0.0175 | 2 |
| <u>FKTN</u>     | <u>NM_001079802</u> | 9 | 2805 | ACAUUCAAC | 2797 | 3 UTR | 0.0221 | 2 |
| <u>FKTN</u>     | <u>NM_001079802</u> | 9 | 2805 | ACAUUCAAC | 2797 | 3 UTR | 0.0221 | 2 |
| <u>FLJ10213</u> | <u>NM_018029</u>    | 7 | 1455 | AACAUUC   | 1449 | 3 UTR | 0.0263 | 1 |
| <u>FLJ10213</u> | <u>NM_018029</u>    | 7 | 1289 | AACAUUC   | 1283 | 3 UTR | 0.0263 | 1 |
| <u>FLJ10213</u> | <u>NM_018029</u>    | 7 | 1455 | AACAUUC   | 1449 | 3 UTR | 0.0263 | 1 |
| <u>FLJ10213</u> | <u>NM_018029</u>    | 7 | 1289 | AACAUUC   | 1283 | 3 UTR | 0.0263 | 1 |
| <u>FLJ11151</u> | <u>NM_018340</u>    | 9 | 3818 | AACAUUCA  | 3810 | 3 UTR | 0.0193 | 1 |
| <u>FLJ11151</u> | <u>NM_018340</u>    | 9 | 3818 | AACAUUCA  | 3810 | 3 UTR | 0.0193 | 1 |
| <u>FLJ11184</u> | <u>NM_018352</u>    | 8 | 1698 | AACAUUCA  | 1691 | 3 UTR | 0.0156 | 1 |
| <u>FLJ11184</u> | <u>NM_018352</u>    | 8 | 1698 | AACAUUCA  | 1691 | 3 UTR | 0.0156 | 1 |
| <u>FLJ13137</u> | <u>NM_001085375</u> | 8 | 3929 | AACAUUCA  | 3922 | 3 UTR | 0.0470 | 1 |
| <u>FLJ13137</u> | <u>NM_001085375</u> | 8 | 3929 | AACAUUCA  | 3922 | 3 UTR | 0.0470 | 1 |
| <u>FLJ31818</u> | <u>NM_152556</u>    | 8 | 2834 | ACAUUCA   | 2827 | 3 UTR | 0.0392 | 2 |
| <u>FLJ31818</u> | <u>NM_152556</u>    | 8 | 2834 | ACAUUCA   | 2827 | 3 UTR | 0.0392 | 2 |
| <u>FLJ32549</u> | <u>NM_152440</u>    | 9 | 2102 | AACAUUCA  | 2094 | 3 UTR | 0.0047 | 1 |
| <u>FLJ32549</u> | <u>NM_152440</u>    | 8 | 2101 | ACAUUCA   | 2094 | 3 UTR | 0.0185 | 2 |
| <u>FLJ32549</u> | <u>NM_152440</u>    | 9 | 2102 | AACAUUCA  | 2094 | 3 UTR | 0.0047 | 1 |
| <u>FLJ32549</u> | <u>NM_152440</u>    | 8 | 2101 | ACAUUCA   | 2094 | 3 UTR | 0.0185 | 2 |
| <u>FLJ42957</u> | <u>NM_207436</u>    | 8 | 1191 | AACAUUCA  | 1184 | 3 UTR | 0.0070 | 1 |
| <u>FLJ42957</u> | <u>NM_207436</u>    | 7 | 1154 | AACAUUC   | 1148 | 3 UTR | 0.0279 | 1 |
| <u>FLJ42957</u> | <u>NM_207436</u>    | 7 | 1190 | ACAUUCA   | 1184 | 3 UTR | 0.0279 | 2 |
| <u>FLJ42957</u> | <u>NM_207436</u>    | 8 | 1191 | AACAUUCA  | 1184 | 3 UTR | 0.0070 | 1 |
| <u>FLJ42957</u> | <u>NM_207436</u>    | 7 | 1154 | AACAUUC   | 1148 | 3 UTR | 0.0279 | 1 |
| <u>FLJ42957</u> | <u>NM_207436</u>    | 7 | 1190 | ACAUUCA   | 1184 | 3 UTR | 0.0279 | 2 |
| <u>FMNL2</u>    | <u>NM_052905</u>    | 8 | 5104 | AACAUUCA  | 5097 | 3 UTR | 0.0290 | 1 |
| <u>FMNL2</u>    | <u>NM_052905</u>    | 8 | 5104 | AACAUUCA  | 5097 | 3 UTR | 0.0290 | 1 |
| <u>FNDC3A</u>   | <u>NM_001079673</u> | 9 | 5728 | ACAUUCAAC | 5720 | 3 UTR | 0.0091 | 2 |

|                |                     |   |      |           |      |       |        |   |
|----------------|---------------------|---|------|-----------|------|-------|--------|---|
| <u>FNDC3A</u>  | <u>NM_001079673</u> | 9 | 5728 | ACAUUCAAC | 5720 | 3 UTR | 0.0091 | 2 |
| <u>FNDC3B</u>  | <u>NM_022763</u>    | 9 | 6742 | AACAUUCA  | 6734 | 3 UTR | 0.0123 | 1 |
| <u>FNDC3B</u>  | <u>NM_022763</u>    | 8 | 6741 | ACAUUCA   | 6734 | 3 UTR | 0.0482 | 2 |
| <u>FNDC3B</u>  | <u>NM_022763</u>    | 8 | 6731 | ACAUUCA   | 6724 | 3 UTR | 0.0482 | 2 |
| <u>FNDC3B</u>  | <u>NM_022763</u>    | 9 | 6742 | AACAUUCA  | 6734 | 3 UTR | 0.0123 | 1 |
| <u>FNDC3B</u>  | <u>NM_022763</u>    | 8 | 6741 | ACAUUCA   | 6734 | 3 UTR | 0.0482 | 2 |
| <u>FNDC3B</u>  | <u>NM_022763</u>    | 8 | 6731 | ACAUUCA   | 6724 | 3 UTR | 0.0482 | 2 |
| <u>FOS</u>     | <u>NM_005252</u>    | 8 | 1897 | AACAUUCA  | 1890 | 3 UTR | 0.0119 | 1 |
| <u>FOS</u>     | <u>NM_005252</u>    | 7 | 1896 | ACAUUCA   | 1890 | 3 UTR | 0.0468 | 2 |
| <u>FOS</u>     | <u>NM_005252</u>    | 8 | 1897 | AACAUUCA  | 1890 | 3 UTR | 0.0119 | 1 |
| <u>FOS</u>     | <u>NM_005252</u>    | 7 | 1896 | ACAUUCA   | 1890 | 3 UTR | 0.0468 | 2 |
| <u>FPRL1</u>   | <u>NM_001462</u>    | 8 | 1743 | AACAUUCA  | 1736 | 3 UTR | 0.0124 | 1 |
| <u>FPRL1</u>   | <u>NM_001462</u>    | 7 | 1742 | ACAUUCA   | 1736 | 3 UTR | 0.0488 | 2 |
| <u>FPRL1</u>   | <u>NM_001462</u>    | 8 | 1743 | AACAUUCA  | 1736 | 3 UTR | 0.0124 | 1 |
| <u>FPRL1</u>   | <u>NM_001462</u>    | 7 | 1742 | ACAUUCA   | 1736 | 3 UTR | 0.0488 | 2 |
| <u>FPRL2</u>   | <u>NM_002030</u>    | 8 | 2485 | AACAUUCA  | 2478 | 3 UTR | 0.0192 | 1 |
| <u>FPRL2</u>   | <u>NM_002030</u>    | 8 | 2485 | AACAUUCA  | 2478 | 3 UTR | 0.0192 | 1 |
| <u>FRAT2</u>   | <u>NM_012083</u>    | 8 | 1471 | ACAUUCA   | 1464 | 3 UTR | 0.0210 | 2 |
| <u>FRAT2</u>   | <u>NM_012083</u>    | 8 | 1471 | ACAUUCA   | 1464 | 3 UTR | 0.0210 | 2 |
| <u>FRMD7</u>   | <u>NM_194277</u>    | 8 | 3151 | AACAUUCA  | 3144 | 3 UTR | 0.0133 | 1 |
| <u>FRMD7</u>   | <u>NM_194277</u>    | 8 | 3151 | AACAUUCA  | 3144 | 3 UTR | 0.0133 | 1 |
| <u>FRMD8</u>   | <u>NM_031904</u>    | 9 | 3705 | AACAUUCA  | 3697 | 3 UTR | 0.0083 | 1 |
| <u>FRMD8</u>   | <u>NM_031904</u>    | 8 | 3704 | ACAUUCA   | 3697 | 3 UTR | 0.0328 | 2 |
| <u>FRMD8</u>   | <u>NM_031904</u>    | 9 | 3705 | AACAUUCA  | 3697 | 3 UTR | 0.0083 | 1 |
| <u>FRMD8</u>   | <u>NM_031904</u>    | 8 | 3704 | ACAUUCA   | 3697 | 3 UTR | 0.0328 | 2 |
| <u>FUT1</u>    | <u>NM_000148</u>    | 8 | 3439 | AACAUUCA  | 3432 | 3 UTR | 0.0326 | 1 |
| <u>FUT1</u>    | <u>NM_000148</u>    | 8 | 3439 | AACAUUCA  | 3432 | 3 UTR | 0.0326 | 1 |
| <u>FUT5</u>    | <u>NM_002034</u>    | 7 | 1581 | ACAUUCA   | 1575 | 3 UTR | 0.0462 | 2 |
| <u>FUT5</u>    | <u>NM_002034</u>    | 7 | 1581 | ACAUUCA   | 1575 | 3 UTR | 0.0462 | 2 |
| <u>G3BP2</u>   | <u>NM_203505</u>    | 8 | 4352 | ACAUUCA   | 4345 | 3 UTR | 0.0398 | 2 |
| <u>G3BP2</u>   | <u>NM_203505</u>    | 8 | 4352 | ACAUUCA   | 4345 | 3 UTR | 0.0398 | 2 |
| <u>GABRA1</u>  | <u>NM_001127644</u> | 8 | 4246 | AACAUUCA  | 4239 | 3 UTR | 0.0380 | 1 |
| <u>GABRA1</u>  | <u>NM_001127644</u> | 9 | 2794 | ACAUUCAAC | 2786 | 3 UTR | 0.0096 | 2 |
| <u>GABRA1</u>  | <u>NM_001127644</u> | 8 | 4246 | AACAUUCA  | 4239 | 3 UTR | 0.0380 | 1 |
| <u>GABRA1</u>  | <u>NM_001127644</u> | 9 | 2794 | ACAUUCAAC | 2786 | 3 UTR | 0.0096 | 2 |
| <u>GAL3ST1</u> | <u>NM_004861</u>    | 7 | 1726 | AACAUUC   | 1720 | 3 UTR | 0.0191 | 1 |
| <u>GAL3ST1</u> | <u>NM_004861</u>    | 7 | 1726 | AACAUUC   | 1720 | 3 UTR | 0.0191 | 1 |
| <u>GALK2</u>   | <u>NM_001001556</u> | 8 | 2146 | ACAUUCA   | 2139 | 3 UTR | 0.0248 | 2 |

|                |                     |   |      |           |      |       |        |   |
|----------------|---------------------|---|------|-----------|------|-------|--------|---|
| <u>GALK2</u>   | <u>NM_001001556</u> | 8 | 2146 | ACAUUCA   | 2139 | 3 UTR | 0.0248 | 2 |
| <u>GALNT3</u>  | <u>NM_004482</u>    | 9 | 3093 | AACAUUCA  | 3085 | 3 UTR | 0.0038 | 1 |
| <u>GALNT3</u>  | <u>NM_004482</u>    | 8 | 3092 | ACAUUCA   | 3085 | 3 UTR | 0.0150 | 2 |
| <u>GALNT3</u>  | <u>NM_004482</u>    | 9 | 3093 | AACAUUCA  | 3085 | 3 UTR | 0.0038 | 1 |
| <u>GALNT3</u>  | <u>NM_004482</u>    | 8 | 3092 | ACAUUCA   | 3085 | 3 UTR | 0.0150 | 2 |
| <u>GALNTL1</u> | <u>NM_020692</u>    | 9 | 2691 | ACAUUCAAC | 2683 | 3 UTR | 0.0044 | 2 |
| <u>GALNTL1</u> | <u>NM_020692</u>    | 9 | 2691 | ACAUUCAAC | 2683 | 3 UTR | 0.0044 | 2 |
| <u>GALNTL2</u> | <u>NM_054110</u>    | 9 | 3777 | ACAUUCAAC | 3769 | 3 UTR | 0.0085 | 2 |
| <u>GALNTL2</u> | <u>NM_054110</u>    | 9 | 3777 | ACAUUCAAC | 3769 | 3 UTR | 0.0085 | 2 |
| <u>GANC</u>    | <u>NM_198141</u>    | 8 | 4585 | ACAUUCA   | 4578 | 3 UTR | 0.0233 | 2 |
| <u>GANC</u>    | <u>NM_198141</u>    | 8 | 4585 | ACAUUCA   | 4578 | 3 UTR | 0.0233 | 2 |
| <u>GAPVD1</u>  | <u>NM_015635</u>    | 9 | 6573 | AACAUUCA  | 6565 | 3 UTR | 0.0087 | 1 |
| <u>GAPVD1</u>  | <u>NM_015635</u>    | 8 | 6572 | ACAUUCA   | 6565 | 3 UTR | 0.0342 | 2 |
| <u>GAPVD1</u>  | <u>NM_015635</u>    | 9 | 6573 | AACAUUCA  | 6565 | 3 UTR | 0.0087 | 1 |
| <u>GAPVD1</u>  | <u>NM_015635</u>    | 8 | 6572 | ACAUUCA   | 6565 | 3 UTR | 0.0342 | 2 |
| <u>GATA2</u>   | <u>NM_032638</u>    | 8 | 1943 | AACAUUCA  | 1936 | 3 UTR | 0.0242 | 1 |
| <u>GATA2</u>   | <u>NM_032638</u>    | 8 | 1943 | AACAUUCA  | 1936 | 3 UTR | 0.0242 | 1 |
| <u>GATM</u>    | <u>NM_001482</u>    | 8 | 2222 | AACAUUCA  | 2215 | 3 UTR | 0.0152 | 1 |
| <u>GATM</u>    | <u>NM_001482</u>    | 8 | 2222 | AACAUUCA  | 2215 | 3 UTR | 0.0152 | 1 |
| <u>GBF1</u>    | <u>NM_004193</u>    | 7 | 5967 | AACAUUC   | 5961 | 3 UTR | 0.0334 | 1 |
| <u>GBF1</u>    | <u>NM_004193</u>    | 7 | 5967 | AACAUUC   | 5961 | 3 UTR | 0.0334 | 1 |
| <u>GBP6</u>    | <u>NM_198460</u>    | 8 | 2738 | ACAUUCA   | 2731 | 3 UTR | 0.0402 | 2 |
| <u>GBP6</u>    | <u>NM_198460</u>    | 8 | 2738 | ACAUUCA   | 2731 | 3 UTR | 0.0402 | 2 |
| <u>GCN1L1</u>  | <u>NM_006836</u>    | 7 | 8584 | AACAUUC   | 8578 | 3 UTR | 0.0401 | 1 |
| <u>GCN1L1</u>  | <u>NM_006836</u>    | 7 | 8584 | AACAUUC   | 8578 | 3 UTR | 0.0401 | 1 |
| <u>GCNT2</u>   | <u>NM_001491</u>    | 9 | 3671 | ACAUUCAAC | 3663 | 3 UTR | 0.0105 | 2 |
| <u>GCNT2</u>   | <u>NM_001491</u>    | 9 | 3671 | ACAUUCAAC | 3663 | 3 UTR | 0.0105 | 2 |
| <u>GCS1</u>    | <u>NM_006302</u>    | 7 | 2843 | ACAUUCA   | 2837 | 3 UTR | 0.0141 | 2 |
| <u>GCS1</u>    | <u>NM_006302</u>    | 7 | 2843 | ACAUUCA   | 2837 | 3 UTR | 0.0141 | 2 |
| <u>GDI1</u>    | <u>NM_001493</u>    | 7 | 2411 | ACAUUCA   | 2405 | 3 UTR | 0.0488 | 2 |
| <u>GDI1</u>    | <u>NM_001493</u>    | 7 | 2411 | ACAUUCA   | 2405 | 3 UTR | 0.0488 | 2 |
| <u>GFPT1</u>   | <u>NM_002056</u>    | 9 | 6688 | ACAUUCAAC | 6680 | 3 UTR | 0.0242 | 2 |
| <u>GFPT1</u>   | <u>NM_002056</u>    | 9 | 6688 | ACAUUCAAC | 6680 | 3 UTR | 0.0242 | 2 |
| <u>GGA2</u>    | <u>NM_015044</u>    | 8 | 3172 | ACAUUCA   | 3165 | 3 UTR | 0.0489 | 2 |
| <u>GGA2</u>    | <u>NM_015044</u>    | 8 | 3172 | ACAUUCA   | 3165 | 3 UTR | 0.0489 | 2 |
| <u>GGPS1</u>   | <u>NM_004837</u>    | 8 | 1382 | ACAUUCA   | 1375 | 3 UTR | 0.0266 | 2 |
| <u>GGPS1</u>   | <u>NM_004837</u>    | 8 | 1382 | ACAUUCA   | 1375 | 3 UTR | 0.0266 | 2 |
| <u>GGT7</u>    | <u>NM_178026</u>    | 7 | 2634 | AACAUUC   | 2628 | 3 UTR | 0.0364 | 1 |

|               |                     |   |      |          |      |       |        |   |
|---------------|---------------------|---|------|----------|------|-------|--------|---|
| <u>GGT7</u>   | <u>NM_178026</u>    | 7 | 2634 | AACAUUC  | 2628 | 3 UTR | 0.0364 | 1 |
| <u>GHITM</u>  | <u>NM_014394</u>    | 9 | 1975 | AACAUUCA | 1967 | 3 UTR | 0.0046 | 1 |
| <u>GHITM</u>  | <u>NM_014394</u>    | 8 | 1974 | ACAUUCA  | 1967 | 3 UTR | 0.0182 | 2 |
| <u>GHITM</u>  | <u>NM_014394</u>    | 9 | 1975 | AACAUUCA | 1967 | 3 UTR | 0.0046 | 1 |
| <u>GHITM</u>  | <u>NM_014394</u>    | 8 | 1974 | ACAUUCA  | 1967 | 3 UTR | 0.0182 | 2 |
| <u>GK</u>     | <u>NM_001128127</u> | 8 | 2350 | AACAUUCA | 2343 | 3 UTR | 0.0281 | 1 |
| <u>GK</u>     | <u>NM_001128127</u> | 8 | 2350 | AACAUUCA | 2343 | 3 UTR | 0.0281 | 1 |
| <u>GLDN</u>   | <u>NM_181789</u>    | 8 | 4431 | AACAUUCA | 4424 | 3 UTR | 0.0485 | 1 |
| <u>GLDN</u>   | <u>NM_181789</u>    | 8 | 4431 | AACAUUCA | 4424 | 3 UTR | 0.0485 | 1 |
| <u>GLRX</u>   | <u>NM_002064</u>    | 8 | 1003 | ACAUUCA  | 996  | 3 UTR | 0.0171 | 2 |
| <u>GLRX</u>   | <u>NM_002064</u>    | 8 | 1003 | ACAUUCA  | 996  | 3 UTR | 0.0171 | 2 |
| <u>GLS</u>    | <u>NM_014905</u>    | 8 | 3690 | AACAUUCA | 3683 | 3 UTR | 0.0312 | 1 |
| <u>GLS</u>    | <u>NM_014905</u>    | 8 | 3690 | AACAUUCA | 3683 | 3 UTR | 0.0312 | 1 |
| <u>GLYCTK</u> | <u>NM_145262</u>    | 8 | 3749 | AACAUUCA | 3742 | 3 UTR | 0.0057 | 1 |
| <u>GLYCTK</u> | <u>NM_145262</u>    | 7 | 3748 | ACAUUCA  | 3742 | 3 UTR | 0.0226 | 2 |
| <u>GLYCTK</u> | <u>NM_145262</u>    | 8 | 3749 | AACAUUCA | 3742 | 3 UTR | 0.0057 | 1 |
| <u>GLYCTK</u> | <u>NM_145262</u>    | 7 | 3748 | ACAUUCA  | 3742 | 3 UTR | 0.0226 | 2 |
| <u>GNA12</u>  | <u>NM_007353</u>    | 8 | 4347 | AACAUUCA | 4340 | 3 UTR | 0.0460 | 1 |
| <u>GNA12</u>  | <u>NM_007353</u>    | 8 | 2573 | AACAUUCA | 2566 | 3 UTR | 0.0460 | 1 |
| <u>GNA12</u>  | <u>NM_007353</u>    | 8 | 4347 | AACAUUCA | 4340 | 3 UTR | 0.0460 | 1 |
| <u>GNA12</u>  | <u>NM_007353</u>    | 8 | 2573 | AACAUUCA | 2566 | 3 UTR | 0.0460 | 1 |
| <u>GNA14</u>  | <u>NM_004297</u>    | 7 | 2012 | AACAUUC  | 2006 | 3 UTR | 0.0224 | 1 |
| <u>GNA14</u>  | <u>NM_004297</u>    | 7 | 2012 | AACAUUC  | 2006 | 3 UTR | 0.0224 | 1 |
| <u>GNS</u>    | <u>NM_002076</u>    | 8 | 3684 | AACAUUCA | 3677 | 3 UTR | 0.0493 | 1 |
| <u>GNS</u>    | <u>NM_002076</u>    | 8 | 3684 | AACAUUCA | 3677 | 3 UTR | 0.0493 | 1 |
| <u>GOLGA7</u> | <u>NM_001002296</u> | 9 | 1328 | AACAUUCA | 1320 | 3 UTR | 0.0054 | 1 |
| <u>GOLGA7</u> | <u>NM_001002296</u> | 8 | 1327 | ACAUUCA  | 1320 | 3 UTR | 0.0215 | 2 |
| <u>GOLGA7</u> | <u>NM_001002296</u> | 9 | 1328 | AACAUUCA | 1320 | 3 UTR | 0.0054 | 1 |
| <u>GOLGA7</u> | <u>NM_001002296</u> | 8 | 1327 | ACAUUCA  | 1320 | 3 UTR | 0.0215 | 2 |
| <u>GOT1</u>   | <u>NM_002079</u>    | 7 | 1844 | ACAUUCA  | 1838 | 3 UTR | 0.0412 | 2 |
| <u>GOT1</u>   | <u>NM_002079</u>    | 7 | 1844 | ACAUUCA  | 1838 | 3 UTR | 0.0412 | 2 |
| <u>GP5</u>    | <u>NM_004488</u>    | 8 | 3287 | AACAUUCA | 3280 | 3 UTR | 0.0268 | 1 |
| <u>GP5</u>    | <u>NM_004488</u>    | 8 | 3029 | ACAUUCA  | 3022 | 3 UTR | 0.0268 | 2 |
| <u>GP5</u>    | <u>NM_004488</u>    | 8 | 3287 | AACAUUCA | 3280 | 3 UTR | 0.0268 | 1 |
| <u>GP5</u>    | <u>NM_004488</u>    | 8 | 3029 | ACAUUCA  | 3022 | 3 UTR | 0.0268 | 2 |
| <u>GPBP1</u>  | <u>NM_001127235</u> | 8 | 2955 | AACAUUCA | 2948 | 3 UTR | 0.0128 | 1 |
| <u>GPBP1</u>  | <u>NM_001127235</u> | 8 | 2955 | AACAUUCA | 2948 | 3 UTR | 0.0128 | 1 |
| <u>GPC5</u>   | <u>NM_004466</u>    | 7 | 2608 | ACAUUCA  | 2602 | 3 UTR | 0.0488 | 2 |

|                |                     |   |      |          |      |       |        |   |
|----------------|---------------------|---|------|----------|------|-------|--------|---|
| <u>GPC5</u>    | <u>NM_004466</u>    | 7 | 2608 | ACAUUCA  | 2602 | 3 UTR | 0.0488 | 2 |
| <u>GPC6</u>    | <u>NM_005708</u>    | 7 | 3789 | AACAUUC  | 3783 | 3 UTR | 0.0287 | 1 |
| <u>GPC6</u>    | <u>NM_005708</u>    | 7 | 4710 | ACAUUCA  | 4704 | 3 UTR | 0.0287 | 2 |
| <u>GPC6</u>    | <u>NM_005708</u>    | 7 | 3789 | AACAUUC  | 3783 | 3 UTR | 0.0287 | 1 |
| <u>GPC6</u>    | <u>NM_005708</u>    | 7 | 4710 | ACAUUCA  | 4704 | 3 UTR | 0.0287 | 2 |
| <u>GPLD1</u>   | <u>NM_001503</u>    | 8 | 2983 | ACAUUCA  | 2976 | 3 UTR | 0.0130 | 2 |
| <u>GPLD1</u>   | <u>NM_001503</u>    | 8 | 2983 | ACAUUCA  | 2976 | 3 UTR | 0.0130 | 2 |
| <u>GPR137B</u> | <u>NM_003272</u>    | 7 | 1609 | AACAUUC  | 1603 | 3 UTR | 0.0450 | 1 |
| <u>GPR137B</u> | <u>NM_003272</u>    | 7 | 1609 | AACAUUC  | 1603 | 3 UTR | 0.0450 | 1 |
| <u>GPR155</u>  | <u>NM_001033045</u> | 9 | 5627 | AACAUUCA | 5619 | 3 UTR | 0.0169 | 1 |
| <u>GPR155</u>  | <u>NM_001033045</u> | 9 | 5627 | AACAUUCA | 5619 | 3 UTR | 0.0169 | 1 |
| <u>GPR174</u>  | <u>NM_032553</u>    | 7 | 1060 | ACAUUCA  | 1054 | 3 UTR | 0.0133 | 2 |
| <u>GPR174</u>  | <u>NM_032553</u>    | 7 | 1060 | ACAUUCA  | 1054 | 3 UTR | 0.0133 | 2 |
| <u>GPR180</u>  | <u>NM_180989</u>    | 8 | 3433 | AACAUUCA | 3426 | 3 UTR | 0.0377 | 1 |
| <u>GPR180</u>  | <u>NM_180989</u>    | 8 | 3433 | AACAUUCA | 3426 | 3 UTR | 0.0377 | 1 |
| <u>GPR22</u>   | <u>NM_005295</u>    | 7 | 2780 | ACAUUCA  | 2774 | 3 UTR | 0.0198 | 2 |
| <u>GPR22</u>   | <u>NM_005295</u>    | 7 | 2780 | ACAUUCA  | 2774 | 3 UTR | 0.0198 | 2 |
| <u>GPR39</u>   | <u>NM_001508</u>    | 8 | 1835 | ACAUUCA  | 1828 | 3 UTR | 0.0150 | 2 |
| <u>GPR39</u>   | <u>NM_001508</u>    | 8 | 1835 | ACAUUCA  | 1828 | 3 UTR | 0.0150 | 2 |
| <u>GPR64</u>   | <u>NM_005756</u>    | 8 | 4610 | AACAUUCA | 4603 | 3 UTR | 0.0241 | 1 |
| <u>GPR64</u>   | <u>NM_005756</u>    | 8 | 4610 | AACAUUCA | 4603 | 3 UTR | 0.0241 | 1 |
| <u>GREM1</u>   | <u>NM_013372</u>    | 9 | 3673 | AACAUUCA | 3665 | 3 UTR | 0.0131 | 1 |
| <u>GREM1</u>   | <u>NM_013372</u>    | 9 | 3673 | AACAUUCA | 3665 | 3 UTR | 0.0131 | 1 |
| <u>GRIK2</u>   | <u>NM_175768</u>    | 8 | 3316 | AACAUUCA | 3309 | 3 UTR | 0.0268 | 1 |
| <u>GRIK2</u>   | <u>NM_175768</u>    | 8 | 3316 | AACAUUCA | 3309 | 3 UTR | 0.0268 | 1 |
| <u>GRM5</u>    | <u>NM_000842</u>    | 7 | 7720 | AACAUUC  | 7714 | 3 UTR | 0.0491 | 1 |
| <u>GRM5</u>    | <u>NM_000842</u>    | 7 | 4486 | ACAUUCA  | 4480 | 3 UTR | 0.0491 | 2 |
| <u>GRM5</u>    | <u>NM_000842</u>    | 7 | 4345 | ACAUUCA  | 4339 | 3 UTR | 0.0491 | 2 |
| <u>GRM5</u>    | <u>NM_000842</u>    | 7 | 3915 | ACAUUCA  | 3909 | 3 UTR | 0.0491 | 2 |
| <u>GRM5</u>    | <u>NM_000842</u>    | 7 | 7720 | AACAUUC  | 7714 | 3 UTR | 0.0491 | 1 |
| <u>GRM5</u>    | <u>NM_000842</u>    | 7 | 4486 | ACAUUCA  | 4480 | 3 UTR | 0.0491 | 2 |
| <u>GRM5</u>    | <u>NM_000842</u>    | 7 | 4345 | ACAUUCA  | 4339 | 3 UTR | 0.0491 | 2 |
| <u>GRM5</u>    | <u>NM_000842</u>    | 7 | 3915 | ACAUUCA  | 3909 | 3 UTR | 0.0491 | 2 |
| <u>GRM8</u>    | <u>NM_001127323</u> | 7 | 3849 | AACAUUC  | 3843 | 3 UTR | 0.0353 | 1 |
| <u>GRM8</u>    | <u>NM_001127323</u> | 7 | 3849 | AACAUUC  | 3843 | 3 UTR | 0.0353 | 1 |
| <u>GSK3B</u>   | <u>NM_002093</u>    | 7 | 5876 | AACAUUC  | 5870 | 3 UTR | 0.0064 | 1 |
| <u>GSK3B</u>   | <u>NM_002093</u>    | 7 | 3641 | AACAUUC  | 3635 | 3 UTR | 0.0064 | 1 |
| <u>GSK3B</u>   | <u>NM_002093</u>    | 7 | 5363 | ACAUUCA  | 5357 | 3 UTR | 0.0064 | 2 |

|                |                  |   |      |          |      |       |        |   |
|----------------|------------------|---|------|----------|------|-------|--------|---|
| <u>GSK3B</u>   | <u>NM_002093</u> | 7 | 5876 | AACAUUC  | 5870 | 3 UTR | 0.0064 | 1 |
| <u>GSK3B</u>   | <u>NM_002093</u> | 7 | 3641 | AACAUUC  | 3635 | 3 UTR | 0.0064 | 1 |
| <u>GSK3B</u>   | <u>NM_002093</u> | 7 | 5363 | ACAUUCA  | 5357 | 3 UTR | 0.0064 | 2 |
| <u>GSTCD</u>   | <u>NM_024751</u> | 8 | 3952 | AACAUUCA | 3945 | 3 UTR | 0.0325 | 1 |
| <u>GSTCD</u>   | <u>NM_024751</u> | 8 | 3952 | AACAUUCA | 3945 | 3 UTR | 0.0325 | 1 |
| <u>GTF2E1</u>  | <u>NM_005513</u> | 8 | 3009 | AACAUUCA | 3002 | 3 UTR | 0.0241 | 1 |
| <u>GTF2E1</u>  | <u>NM_005513</u> | 8 | 3009 | AACAUUCA | 3002 | 3 UTR | 0.0241 | 1 |
| <u>GTF2H1</u>  | <u>NM_005316</u> | 8 | 2814 | AACAUUCA | 2807 | 3 UTR | 0.0178 | 1 |
| <u>GTF2H1</u>  | <u>NM_005316</u> | 8 | 2814 | AACAUUCA | 2807 | 3 UTR | 0.0178 | 1 |
| <u>GTF2H5</u>  | <u>NM_207118</u> | 7 | 6498 | AACAUUC  | 6492 | 3 UTR | 0.0121 | 1 |
| <u>GTF2H5</u>  | <u>NM_207118</u> | 7 | 4595 | ACAUUCA  | 4589 | 3 UTR | 0.0121 | 2 |
| <u>GTF2H5</u>  | <u>NM_207118</u> | 7 | 6498 | AACAUUC  | 6492 | 3 UTR | 0.0121 | 1 |
| <u>GTF2H5</u>  | <u>NM_207118</u> | 7 | 4595 | ACAUUCA  | 4589 | 3 UTR | 0.0121 | 2 |
| <u>GTPBP10</u> | <u>NM_033107</u> | 8 | 2478 | ACAUUCA  | 2471 | 3 UTR | 0.0327 | 2 |
| <u>GTPBP10</u> | <u>NM_033107</u> | 8 | 2478 | ACAUUCA  | 2471 | 3 UTR | 0.0327 | 2 |
| <u>GTPBP3</u>  | <u>NM_133644</u> | 9 | 2591 | AACAUUCA | 2583 | 3 UTR | 0.0040 | 1 |
| <u>GTPBP3</u>  | <u>NM_133644</u> | 8 | 2590 | ACAUUCA  | 2583 | 3 UTR | 0.0158 | 2 |
| <u>GTPBP3</u>  | <u>NM_133644</u> | 9 | 2591 | AACAUUCA | 2583 | 3 UTR | 0.0040 | 1 |
| <u>GTPBP3</u>  | <u>NM_133644</u> | 8 | 2590 | ACAUUCA  | 2583 | 3 UTR | 0.0158 | 2 |
| <u>GTSE1</u>   | <u>NM_016426</u> | 9 | 2948 | AACAUUCA | 2940 | 3 UTR | 0.0085 | 1 |
| <u>GTSE1</u>   | <u>NM_016426</u> | 8 | 2947 | ACAUUCA  | 2940 | 3 UTR | 0.0335 | 2 |
| <u>GTSE1</u>   | <u>NM_016426</u> | 9 | 2948 | AACAUUCA | 2940 | 3 UTR | 0.0085 | 1 |
| <u>GTSE1</u>   | <u>NM_016426</u> | 8 | 2947 | ACAUUCA  | 2940 | 3 UTR | 0.0335 | 2 |
| <u>GUCA1B</u>  | <u>NM_002098</u> | 8 | 1799 | AACAUUCA | 1792 | 3 UTR | 0.0233 | 1 |
| <u>GUCA1B</u>  | <u>NM_002098</u> | 8 | 1799 | AACAUUCA | 1792 | 3 UTR | 0.0233 | 1 |
| <u>H2AFJ</u>   | <u>NM_177925</u> | 8 | 602  | ACAUUCA  | 595  | 3 UTR | 0.0473 | 2 |
| <u>H2AFJ</u>   | <u>NM_177925</u> | 8 | 602  | ACAUUCA  | 595  | 3 UTR | 0.0473 | 2 |
| <u>H3F3B</u>   | <u>NM_005324</u> | 8 | 1708 | ACAUUCA  | 1701 | 3 UTR | 0.0331 | 2 |
| <u>H3F3B</u>   | <u>NM_005324</u> | 8 | 1708 | ACAUUCA  | 1701 | 3 UTR | 0.0331 | 2 |
| <u>HAND2</u>   | <u>NM_021973</u> | 8 | 1900 | AACAUUCA | 1893 | 3 UTR | 0.0118 | 1 |
| <u>HAND2</u>   | <u>NM_021973</u> | 7 | 1899 | ACAUUCA  | 1893 | 3 UTR | 0.0463 | 2 |
| <u>HAND2</u>   | <u>NM_021973</u> | 8 | 1900 | AACAUUCA | 1893 | 3 UTR | 0.0118 | 1 |
| <u>HAND2</u>   | <u>NM_021973</u> | 7 | 1899 | ACAUUCA  | 1893 | 3 UTR | 0.0463 | 2 |
| <u>HAO1</u>    | <u>NM_017545</u> | 8 | 1651 | ACAUUCA  | 1644 | 3 UTR | 0.0092 | 2 |
| <u>HAO1</u>    | <u>NM_017545</u> | 8 | 1651 | ACAUUCA  | 1644 | 3 UTR | 0.0092 | 2 |
| <u>HAPLN1</u>  | <u>NM_001884</u> | 8 | 2835 | AACAUUCA | 2828 | 3 UTR | 0.0491 | 1 |
| <u>HAPLN1</u>  | <u>NM_001884</u> | 8 | 2835 | AACAUUCA | 2828 | 3 UTR | 0.0491 | 1 |
| <u>HBD</u>     | <u>NM_000519</u> | 7 | 757  | AACAUUC  | 751  | 3 UTR | 0.0082 | 1 |

|                 |                     |    |      |            |      |       |        |   |
|-----------------|---------------------|----|------|------------|------|-------|--------|---|
| <u>HBD</u>      | <u>NM_000519</u>    | 7  | 757  | AACAUUC    | 751  | 3 UTR | 0.0082 | 1 |
| <u>HCN2</u>     | <u>NM_001194</u>    | 7  | 3309 | ACAUUCA    | 3303 | 3 UTR | 0.0439 | 2 |
| <u>HCN2</u>     | <u>NM_001194</u>    | 7  | 3309 | ACAUUCA    | 3303 | 3 UTR | 0.0439 | 2 |
| <u>HEATR3</u>   | <u>NM_182922</u>    | 8  | 2280 | ACAUUCAA   | 2273 | 3 UTR | 0.0064 | 2 |
| <u>HEATR3</u>   | <u>NM_182922</u>    | 8  | 2280 | ACAUUCAA   | 2273 | 3 UTR | 0.0064 | 2 |
| <u>HEMGN</u>    | <u>NM_018437</u>    | 7  | 2093 | ACAUUCA    | 2087 | 3 UTR | 0.0368 | 2 |
| <u>HEMGN</u>    | <u>NM_018437</u>    | 7  | 2093 | ACAUUCA    | 2087 | 3 UTR | 0.0368 | 2 |
| <u>HEPH</u>     | <u>NM_001130860</u> | 7  | 4343 | AACAUUC    | 4337 | 3 UTR | 0.0428 | 1 |
| <u>HEPH</u>     | <u>NM_001130860</u> | 7  | 4343 | AACAUUC    | 4337 | 3 UTR | 0.0428 | 1 |
| <u>HHIP</u>     | <u>NM_022475</u>    | 7  | 3225 | AACAUUC    | 3219 | 3 UTR | 0.0460 | 1 |
| <u>HHIP</u>     | <u>NM_022475</u>    | 7  | 3225 | AACAUUC    | 3219 | 3 UTR | 0.0460 | 1 |
| <u>HIG2</u>     | <u>NM_013332</u>    | 8  | 1134 | ACAUUCAA   | 1127 | 3 UTR | 0.0148 | 2 |
| <u>HIG2</u>     | <u>NM_013332</u>    | 8  | 1134 | ACAUUCAA   | 1127 | 3 UTR | 0.0148 | 2 |
| <u>HIGD2A</u>   | <u>NM_138820</u>    | 9  | 548  | AACAUUCAA  | 540  | 3 UTR | 0.0010 | 1 |
| <u>HIGD2A</u>   | <u>NM_138820</u>    | 8  | 547  | ACAUUCAA   | 540  | 3 UTR | 0.0041 | 2 |
| <u>HIGD2A</u>   | <u>NM_138820</u>    | 9  | 548  | AACAUUCAA  | 540  | 3 UTR | 0.0010 | 1 |
| <u>HIGD2A</u>   | <u>NM_138820</u>    | 8  | 547  | ACAUUCAA   | 540  | 3 UTR | 0.0041 | 2 |
| <u>HINT3</u>    | <u>NM_138571</u>    | 8  | 2235 | AACAUUCA   | 2228 | 3 UTR | 0.0387 | 1 |
| <u>HINT3</u>    | <u>NM_138571</u>    | 8  | 2235 | AACAUUCA   | 2228 | 3 UTR | 0.0387 | 1 |
| <u>HISPPD1</u>  | <u>NM_015216</u>    | 9  | 5171 | ACAUUCAAC  | 5163 | 3 UTR | 0.0060 | 2 |
| <u>HISPPD1</u>  | <u>NM_015216</u>    | 9  | 5171 | ACAUUCAAC  | 5163 | 3 UTR | 0.0060 | 2 |
| <u>HIST1H3D</u> | <u>NM_003530</u>    | 7  | 824  | ACAUUCA    | 818  | 3 UTR | 0.0034 | 2 |
| <u>HIST1H3D</u> | <u>NM_003530</u>    | 7  | 824  | ACAUUCA    | 818  | 3 UTR | 0.0034 | 2 |
| <u>HK2</u>      | <u>NM_000189</u>    | 9  | 6873 | AACAUUCAA  | 6865 | 3 UTR | 0.0092 | 1 |
| <u>HK2</u>      | <u>NM_000189</u>    | 8  | 6872 | ACAUUCAA   | 6865 | 3 UTR | 0.0364 | 2 |
| <u>HK2</u>      | <u>NM_000189</u>    | 9  | 6873 | AACAUUCAA  | 6865 | 3 UTR | 0.0092 | 1 |
| <u>HK2</u>      | <u>NM_000189</u>    | 8  | 6872 | ACAUUCAA   | 6865 | 3 UTR | 0.0364 | 2 |
| <u>HLA-B</u>    | <u>NM_005514</u>    | 7  | 1254 | ACAUUCA    | 1248 | 3 UTR | 0.0262 | 2 |
| <u>HLA-B</u>    | <u>NM_005514</u>    | 7  | 1254 | ACAUUCA    | 1248 | 3 UTR | 0.0262 | 2 |
| <u>HLA-C</u>    | <u>NM_002117</u>    | 7  | 1209 | ACAUUCA    | 1203 | 3 UTR | 0.0262 | 2 |
| <u>HLA-C</u>    | <u>NM_002117</u>    | 7  | 1209 | ACAUUCA    | 1203 | 3 UTR | 0.0262 | 2 |
| <u>HMGA2</u>    | <u>NM_003483</u>    | 8  | 2411 | AACAUUCA   | 2404 | 3 UTR | 0.0449 | 1 |
| <u>HMGA2</u>    | <u>NM_003483</u>    | 8  | 2411 | AACAUUCA   | 2404 | 3 UTR | 0.0449 | 1 |
| <u>HMGB2</u>    | <u>NM_002129</u>    | 10 | 1055 | AACAUUCAAC | 1046 | 3 UTR | 0.0007 | 1 |
| <u>HMGB2</u>    | <u>NM_002129</u>    | 9  | 1054 | ACAUUCAAC  | 1046 | 3 UTR | 0.0027 | 2 |
| <u>HMGB2</u>    | <u>NM_002129</u>    | 10 | 1055 | AACAUUCAAC | 1046 | 3 UTR | 0.0007 | 1 |
| <u>HMGB2</u>    | <u>NM_002129</u>    | 9  | 1054 | ACAUUCAAC  | 1046 | 3 UTR | 0.0027 | 2 |
| <u>HMGCL</u>    | <u>NM_000191</u>    | 7  | 1551 | ACAUUCA    | 1545 | 3 UTR | 0.0357 | 2 |

|                 |                     |   |      |           |      |       |        |   |
|-----------------|---------------------|---|------|-----------|------|-------|--------|---|
| <u>HMGCL</u>    | <u>NM_000191</u>    | 7 | 1551 | ACAUUCA   | 1545 | 3 UTR | 0.0357 | 2 |
| <u>HOOK1</u>    | <u>NM_015888</u>    | 9 | 5399 | AACAUUCA  | 5391 | 3 UTR | 0.0130 | 1 |
| <u>HOOK1</u>    | <u>NM_015888</u>    | 9 | 5399 | AACAUUCA  | 5391 | 3 UTR | 0.0130 | 1 |
| <u>HOOK3</u>    | <u>NM_032410</u>    | 9 | 8488 | AACAUUCA  | 8480 | 3 UTR | 0.0450 | 1 |
| <u>HOOK3</u>    | <u>NM_032410</u>    | 9 | 8488 | AACAUUCA  | 8480 | 3 UTR | 0.0450 | 1 |
| <u>HOXA11</u>   | <u>NM_005523</u>    | 8 | 2239 | ACAUUCA   | 2232 | 3 UTR | 0.0247 | 2 |
| <u>HOXA11</u>   | <u>NM_005523</u>    | 8 | 2239 | ACAUUCA   | 2232 | 3 UTR | 0.0247 | 2 |
| <u>HOXB5</u>    | <u>NM_002147</u>    | 8 | 1150 | AACAUUCA  | 1143 | 3 UTR | 0.0146 | 1 |
| <u>HOXB5</u>    | <u>NM_002147</u>    | 8 | 1150 | AACAUUCA  | 1143 | 3 UTR | 0.0146 | 1 |
| <u>HOXD1</u>    | <u>NM_024501</u>    | 8 | 1859 | ACAUUCA   | 1852 | 3 UTR | 0.0118 | 2 |
| <u>HOXD1</u>    | <u>NM_024501</u>    | 8 | 1859 | ACAUUCA   | 1852 | 3 UTR | 0.0118 | 2 |
| <u>HPS4</u>     | <u>NM_022081</u>    | 8 | 3774 | AACAUUCA  | 3767 | 3 UTR | 0.0264 | 1 |
| <u>HPS4</u>     | <u>NM_022081</u>    | 8 | 3774 | AACAUUCA  | 3767 | 3 UTR | 0.0264 | 1 |
| <u>HPSE2</u>    | <u>NM_021828</u>    | 7 | 2101 | AACAUUC   | 2095 | 3 UTR | 0.0273 | 1 |
| <u>HPSE2</u>    | <u>NM_021828</u>    | 7 | 2101 | AACAUUC   | 2095 | 3 UTR | 0.0273 | 1 |
| <u>HRH1</u>     | <u>NM_001098213</u> | 8 | 4455 | ACAUUCA   | 4448 | 3 UTR | 0.0414 | 2 |
| <u>HRH1</u>     | <u>NM_001098213</u> | 8 | 4455 | ACAUUCA   | 4448 | 3 UTR | 0.0414 | 2 |
| <u>HS2ST1</u>   | <u>NM_012262</u>    | 9 | 5631 | ACAUUCAAC | 5623 | 3 UTR | 0.0201 | 2 |
| <u>HS2ST1</u>   | <u>NM_012262</u>    | 9 | 5631 | ACAUUCAAC | 5623 | 3 UTR | 0.0201 | 2 |
| <u>HS3ST2</u>   | <u>NM_006043</u>    | 8 | 1480 | AACAUUCA  | 1473 | 3 UTR | 0.0120 | 1 |
| <u>HS3ST2</u>   | <u>NM_006043</u>    | 7 | 1479 | ACAUUCA   | 1473 | 3 UTR | 0.0472 | 2 |
| <u>HS3ST2</u>   | <u>NM_006043</u>    | 8 | 1480 | AACAUUCA  | 1473 | 3 UTR | 0.0120 | 1 |
| <u>HS3ST2</u>   | <u>NM_006043</u>    | 7 | 1479 | ACAUUCA   | 1473 | 3 UTR | 0.0472 | 2 |
| <u>HS3ST3A1</u> | <u>NM_006042</u>    | 8 | 2141 | AACAUUCA  | 2134 | 3 UTR | 0.0080 | 1 |
| <u>HS3ST3A1</u> | <u>NM_006042</u>    | 7 | 2140 | ACAUUCA   | 2134 | 3 UTR | 0.0317 | 2 |
| <u>HS3ST3A1</u> | <u>NM_006042</u>    | 8 | 2141 | AACAUUCA  | 2134 | 3 UTR | 0.0080 | 1 |
| <u>HS3ST3A1</u> | <u>NM_006042</u>    | 7 | 2140 | ACAUUCA   | 2134 | 3 UTR | 0.0317 | 2 |
| <u>HSD11B1</u>  | <u>NM_181755</u>    | 7 | 1173 | ACAUUCA   | 1167 | 3 UTR | 0.0258 | 2 |
| <u>HSD11B1</u>  | <u>NM_181755</u>    | 7 | 1173 | ACAUUCA   | 1167 | 3 UTR | 0.0258 | 2 |
| <u>HSD3B1</u>   | <u>NM_000862</u>    | 9 | 1673 | AACAUUCA  | 1665 | 3 UTR | 0.0016 | 1 |
| <u>HSD3B1</u>   | <u>NM_000862</u>    | 8 | 1672 | ACAUUCA   | 1665 | 3 UTR | 0.0064 | 2 |
| <u>HSD3B1</u>   | <u>NM_000862</u>    | 9 | 1673 | AACAUUCA  | 1665 | 3 UTR | 0.0016 | 1 |
| <u>HSD3B1</u>   | <u>NM_000862</u>    | 8 | 1672 | ACAUUCA   | 1665 | 3 UTR | 0.0064 | 2 |
| <u>HSDL2</u>    | <u>NM_032303</u>    | 8 | 2127 | ACAUUCA   | 2120 | 3 UTR | 0.0280 | 2 |
| <u>HSDL2</u>    | <u>NM_032303</u>    | 8 | 2127 | ACAUUCA   | 2120 | 3 UTR | 0.0280 | 2 |
| <u>HSPA1L</u>   | <u>NM_005527</u>    | 8 | 2342 | ACAUUCA   | 2335 | 3 UTR | 0.0067 | 2 |
| <u>HSPA1L</u>   | <u>NM_005527</u>    | 8 | 2342 | ACAUUCA   | 2335 | 3 UTR | 0.0067 | 2 |
| <u>HSPB3</u>    | <u>NM_006308</u>    | 7 | 698  | AACAUUC   | 692  | 3 UTR | 0.0083 | 1 |



|                |                     |    |      |            |      |       |        |   |
|----------------|---------------------|----|------|------------|------|-------|--------|---|
| <u>HSPB3</u>   | <u>NM_006308</u>    | 7  | 698  | AACAUUC    | 692  | 3 UTR | 0.0083 | 1 |
| <u>HSPC159</u> | <u>NM_014181</u>    | 8  | 1476 | ACAUCAA    | 1469 | 3 UTR | 0.0443 | 2 |
| <u>HSPC159</u> | <u>NM_014181</u>    | 8  | 1476 | ACAUCAA    | 1469 | 3 UTR | 0.0443 | 2 |
| <u>HTF9C</u>   | <u>NM_022727</u>    | 7  | 2621 | AACAUUC    | 2615 | 3 UTR | 0.0418 | 1 |
| <u>HTF9C</u>   | <u>NM_022727</u>    | 7  | 2621 | AACAUUC    | 2615 | 3 UTR | 0.0418 | 1 |
| <u>HYAL4</u>   | <u>NM_012269</u>    | 7  | 2361 | ACAUUCA    | 2355 | 3 UTR | 0.0198 | 2 |
| <u>HYAL4</u>   | <u>NM_012269</u>    | 7  | 2361 | ACAUUCA    | 2355 | 3 UTR | 0.0198 | 2 |
| <u>ICT1</u>    | <u>NM_001545</u>    | 7  | 765  | AACAUUC    | 759  | 3 UTR | 0.0160 | 1 |
| <u>ICT1</u>    | <u>NM_001545</u>    | 7  | 765  | AACAUUC    | 759  | 3 UTR | 0.0160 | 1 |
| <u>ID4</u>     | <u>NM_001546</u>    | 8  | 1577 | ACAUCAA    | 1570 | 3 UTR | 0.0231 | 2 |
| <u>ID4</u>     | <u>NM_001546</u>    | 8  | 1577 | ACAUCAA    | 1570 | 3 UTR | 0.0231 | 2 |
| <u>IDH1</u>    | <u>NM_005896</u>    | 8  | 2033 | AACAUUCA   | 2026 | 3 UTR | 0.0130 | 1 |
| <u>IDH1</u>    | <u>NM_005896</u>    | 8  | 2033 | AACAUUCA   | 2026 | 3 UTR | 0.0130 | 1 |
| <u>IFNG</u>    | <u>NM_000619</u>    | 8  | 1054 | ACAUCAA    | 1047 | 3 UTR | 0.0093 | 2 |
| <u>IFNG</u>    | <u>NM_000619</u>    | 8  | 1054 | ACAUCAA    | 1047 | 3 UTR | 0.0093 | 2 |
| <u>IFT74</u>   | <u>NM_001099222</u> | 8  | 2092 | AACAUUCA   | 2085 | 3 UTR | 0.0032 | 1 |
| <u>IFT74</u>   | <u>NM_001099222</u> | 7  | 2091 | ACAUUCA    | 2085 | 3 UTR | 0.0127 | 2 |
| <u>IFT74</u>   | <u>NM_001099222</u> | 8  | 2092 | AACAUUCA   | 2085 | 3 UTR | 0.0032 | 1 |
| <u>IFT74</u>   | <u>NM_001099222</u> | 7  | 2091 | ACAUUCA    | 2085 | 3 UTR | 0.0127 | 2 |
| <u>IFT80</u>   | <u>NM_020800</u>    | 9  | 3632 | AACAUCAA   | 3624 | 3 UTR | 0.0059 | 1 |
| <u>IFT80</u>   | <u>NM_020800</u>    | 8  | 3631 | ACAUCAA    | 3624 | 3 UTR | 0.0233 | 2 |
| <u>IFT80</u>   | <u>NM_020800</u>    | 9  | 3632 | AACAUCAA   | 3624 | 3 UTR | 0.0059 | 1 |
| <u>IFT80</u>   | <u>NM_020800</u>    | 8  | 3631 | ACAUCAA    | 3624 | 3 UTR | 0.0233 | 2 |
| <u>IFT81</u>   | <u>NM_014055</u>    | 9  | 2748 | AACAUCAA   | 2740 | 3 UTR | 0.0022 | 1 |
| <u>IFT81</u>   | <u>NM_014055</u>    | 8  | 2747 | ACAUCAA    | 2740 | 3 UTR | 0.0088 | 2 |
| <u>IFT81</u>   | <u>NM_014055</u>    | 9  | 2748 | AACAUCAA   | 2740 | 3 UTR | 0.0022 | 1 |
| <u>IFT81</u>   | <u>NM_014055</u>    | 8  | 2747 | ACAUCAA    | 2740 | 3 UTR | 0.0088 | 2 |
| <u>IL13RA2</u> | <u>NM_000640</u>    | 7  | 1370 | AACAUUC    | 1364 | 3 UTR | 0.0066 | 1 |
| <u>IL13RA2</u> | <u>NM_000640</u>    | 7  | 1370 | AACAUUC    | 1364 | 3 UTR | 0.0066 | 1 |
| <u>IL1A</u>    | <u>NM_000575</u>    | 8  | 1908 | AACAUUCA   | 1901 | 3 UTR | 0.0176 | 1 |
| <u>IL1A</u>    | <u>NM_000575</u>    | 8  | 1908 | AACAUUCA   | 1901 | 3 UTR | 0.0176 | 1 |
| <u>IL1B</u>    | <u>NM_000576</u>    | 7  | 932  | ACAUUCA    | 926  | 3 UTR | 0.0360 | 2 |
| <u>IL1B</u>    | <u>NM_000576</u>    | 7  | 932  | ACAUUCA    | 926  | 3 UTR | 0.0360 | 2 |
| <u>IL1R1</u>   | <u>NM_000877</u>    | 8  | 2331 | AACAUUCA   | 2324 | 3 UTR | 0.0464 | 1 |
| <u>IL1R1</u>   | <u>NM_000877</u>    | 8  | 2331 | AACAUUCA   | 2324 | 3 UTR | 0.0464 | 1 |
| <u>IL1RAP</u>  | <u>NM_002182</u>    | 8  | 3779 | AACAUUCA   | 3772 | 3 UTR | 0.0419 | 1 |
| <u>IL1RAP</u>  | <u>NM_002182</u>    | 8  | 3779 | AACAUUCA   | 3772 | 3 UTR | 0.0419 | 1 |
| <u>IL2</u>     | <u>NM_000586</u>    | 10 | 739  | AACAUACAAC | 730  | 3 UTR | 0.0003 | 1 |

|               |                     |    |      |            |      |       |        |   |
|---------------|---------------------|----|------|------------|------|-------|--------|---|
| <u>IL2</u>    | <u>NM_000586</u>    | 9  | 738  | ACAUUCAAC  | 730  | 3 UTR | 0.0012 | 2 |
| <u>IL2</u>    | <u>NM_000586</u>    | 9  | 597  | ACAUUCAAC  | 589  | 3 UTR | 0.0012 | 2 |
| <u>IL2</u>    | <u>NM_000586</u>    | 10 | 739  | AACAUUCAAC | 730  | 3 UTR | 0.0003 | 1 |
| <u>IL2</u>    | <u>NM_000586</u>    | 9  | 738  | ACAUUCAAC  | 730  | 3 UTR | 0.0012 | 2 |
| <u>IL2</u>    | <u>NM_000586</u>    | 9  | 597  | ACAUUCAAC  | 589  | 3 UTR | 0.0012 | 2 |
| <u>IL25</u>   | <u>NM_022789</u>    | 8  | 1328 | ACAUUCAAA  | 1321 | 3 UTR | 0.0083 | 2 |
| <u>IL25</u>   | <u>NM_022789</u>    | 8  | 1328 | ACAUUCAAA  | 1321 | 3 UTR | 0.0083 | 2 |
| <u>IMP3</u>   | <u>NM_018285</u>    | 7  | 825  | AACAUUC    | 819  | 3 UTR | 0.0312 | 1 |
| <u>IMP3</u>   | <u>NM_018285</u>    | 7  | 825  | AACAUUC    | 819  | 3 UTR | 0.0312 | 1 |
| <u>IMPG1</u>  | <u>NM_001563</u>    | 7  | 2982 | ACAUUCA    | 2976 | 3 UTR | 0.0444 | 2 |
| <u>IMPG1</u>  | <u>NM_001563</u>    | 7  | 2982 | ACAUUCA    | 2976 | 3 UTR | 0.0444 | 2 |
| <u>INADL</u>  | <u>NM_176877</u>    | 8  | 8448 | AACAUUCA   | 8441 | 3 UTR | 0.0445 | 1 |
| <u>INADL</u>  | <u>NM_176877</u>    | 8  | 8448 | AACAUUCA   | 8441 | 3 UTR | 0.0445 | 1 |
| <u>INCENP</u> | <u>NM_001040694</u> | 8  | 3247 | AACAUUCA   | 3240 | 3 UTR | 0.0179 | 1 |
| <u>INCENP</u> | <u>NM_001040694</u> | 8  | 3247 | AACAUUCA   | 3240 | 3 UTR | 0.0179 | 1 |
| <u>INDOL1</u> | <u>NM_194294</u>    | 7  | 1975 | ACAUUCA    | 1969 | 3 UTR | 0.0470 | 2 |
| <u>INDOL1</u> | <u>NM_194294</u>    | 7  | 1975 | ACAUUCA    | 1969 | 3 UTR | 0.0470 | 2 |
| <u>INOC1</u>  | <u>NM_017553</u>    | 8  | 6117 | ACAUUCAAA  | 6110 | 3 UTR | 0.0206 | 2 |
| <u>INOC1</u>  | <u>NM_017553</u>    | 8  | 6117 | ACAUUCAAA  | 6110 | 3 UTR | 0.0206 | 2 |
| <u>INPP4B</u> | <u>NM_003866</u>    | 7  | 4063 | ACAUUCA    | 4057 | 3 UTR | 0.0459 | 2 |
| <u>INPP4B</u> | <u>NM_003866</u>    | 7  | 4063 | ACAUUCA    | 4057 | 3 UTR | 0.0459 | 2 |
| <u>INPP5E</u> | <u>NM_019892</u>    | 8  | 3288 | ACAUUCAAA  | 3281 | 3 UTR | 0.0169 | 2 |
| <u>INPP5E</u> | <u>NM_019892</u>    | 8  | 3288 | ACAUUCAAA  | 3281 | 3 UTR | 0.0169 | 2 |
| <u>INVS</u>   | <u>NM_014425</u>    | 7  | 3571 | AACAUUC    | 3565 | 3 UTR | 0.0283 | 1 |
| <u>INVS</u>   | <u>NM_014425</u>    | 7  | 3571 | AACAUUC    | 3565 | 3 UTR | 0.0283 | 1 |
| <u>IPPK</u>   | <u>NM_022755</u>    | 8  | 1851 | AACAUUCA   | 1844 | 3 UTR | 0.0396 | 1 |
| <u>IPPK</u>   | <u>NM_022755</u>    | 8  | 1851 | AACAUUCA   | 1844 | 3 UTR | 0.0396 | 1 |
| <u>IQWD1</u>  | <u>NM_018442</u>    | 7  | 3087 | AACAUUC    | 3081 | 3 UTR | 0.0252 | 1 |
| <u>IQWD1</u>  | <u>NM_018442</u>    | 7  | 3087 | AACAUUC    | 3081 | 3 UTR | 0.0252 | 1 |
| <u>IRF5</u>   | <u>NM_001098629</u> | 8  | 2227 | AACAUUCA   | 2220 | 3 UTR | 0.0187 | 1 |
| <u>IRF5</u>   | <u>NM_001098629</u> | 8  | 2227 | AACAUUCA   | 2220 | 3 UTR | 0.0187 | 1 |
| <u>IRS2</u>   | <u>NM_003749</u>    | 9  | 6181 | ACAUUCAAC  | 6173 | 3 UTR | 0.0094 | 2 |
| <u>IRS2</u>   | <u>NM_003749</u>    | 9  | 6181 | ACAUUCAAC  | 6173 | 3 UTR | 0.0094 | 2 |
| <u>ITGA3</u>  | <u>NM_002204</u>    | 8  | 4696 | ACAUUCAAA  | 4689 | 3 UTR | 0.0215 | 2 |
| <u>ITGA3</u>  | <u>NM_002204</u>    | 8  | 4696 | ACAUUCAAA  | 4689 | 3 UTR | 0.0215 | 2 |
| <u>ITGB8</u>  | <u>NM_002214</u>    | 9  | 3993 | AACAUUCAAA | 3985 | 3 UTR | 0.0218 | 1 |
| <u>ITGB8</u>  | <u>NM_002214</u>    | 9  | 3993 | AACAUUCAAA | 3985 | 3 UTR | 0.0218 | 1 |
| <u>ITLN1</u>  | <u>NM_017625</u>    | 7  | 1144 | AACAUUC    | 1138 | 3 UTR | 0.0092 | 1 |

|               |                  |    |      |            |      |       |        |   |
|---------------|------------------|----|------|------------|------|-------|--------|---|
| <u>ITLN1</u>  | <u>NM_017625</u> | 7  | 1144 | AACAUUC    | 1138 | 3 UTR | 0.0092 | 1 |
| <u>ITSN1</u>  | <u>NM_003024</u> | 8  | 6355 | ACAUUCA    | 6348 | 3 UTR | 0.0152 | 2 |
| <u>ITSN1</u>  | <u>NM_003024</u> | 8  | 6355 | ACAUUCA    | 6348 | 3 UTR | 0.0152 | 2 |
| <u>ITSN2</u>  | <u>NM_006277</u> | 9  | 5689 | ACAUUCAAC  | 5681 | 3 UTR | 0.0029 | 2 |
| <u>ITSN2</u>  | <u>NM_006277</u> | 9  | 5689 | ACAUUCAAC  | 5681 | 3 UTR | 0.0029 | 2 |
| <u>IVD</u>    | <u>NM_002225</u> | 7  | 4472 | ACAUUCA    | 4466 | 3 UTR | 0.0360 | 2 |
| <u>IVD</u>    | <u>NM_002225</u> | 7  | 4472 | ACAUUCA    | 4466 | 3 UTR | 0.0360 | 2 |
| <u>IYD</u>    | <u>NM_203395</u> | 9  | 3704 | ACAUUCAAC  | 3696 | 3 UTR | 0.0241 | 2 |
| <u>IYD</u>    | <u>NM_203395</u> | 9  | 3704 | ACAUUCAAC  | 3696 | 3 UTR | 0.0241 | 2 |
| <u>JARID2</u> | <u>NM_004973</u> | 8  | 5014 | ACAUUCA    | 5007 | 3 UTR | 0.0267 | 2 |
| <u>JARID2</u> | <u>NM_004973</u> | 8  | 5014 | ACAUUCA    | 5007 | 3 UTR | 0.0267 | 2 |
| <u>JMJD1A</u> | <u>NM_018433</u> | 7  | 4224 | AACAUUC    | 4218 | 3 UTR | 0.0365 | 1 |
| <u>JMJD1A</u> | <u>NM_018433</u> | 7  | 4224 | AACAUUC    | 4218 | 3 UTR | 0.0365 | 1 |
| <u>JOSD3</u>  | <u>NM_024116</u> | 7  | 1054 | ACAUUCA    | 1048 | 3 UTR | 0.0147 | 2 |
| <u>JOSD3</u>  | <u>NM_024116</u> | 7  | 1054 | ACAUUCA    | 1048 | 3 UTR | 0.0147 | 2 |
| <u>JPH4</u>   | <u>NM_032452</u> | 8  | 3259 | ACAUUCA    | 3252 | 3 UTR | 0.0242 | 2 |
| <u>JPH4</u>   | <u>NM_032452</u> | 8  | 3259 | ACAUUCA    | 3252 | 3 UTR | 0.0242 | 2 |
| <u>JRK</u>    | <u>NM_003724</u> | 10 | 4768 | AACAUUCAAC | 4759 | 3 UTR | 0.0066 | 1 |
| <u>JRK</u>    | <u>NM_003724</u> | 9  | 4767 | ACAUUCAAC  | 4759 | 3 UTR | 0.0260 | 2 |
| <u>JRK</u>    | <u>NM_003724</u> | 10 | 4768 | AACAUUCAAC | 4759 | 3 UTR | 0.0066 | 1 |
| <u>JRK</u>    | <u>NM_003724</u> | 9  | 4767 | ACAUUCAAC  | 4759 | 3 UTR | 0.0260 | 2 |
| <u>KBTBD6</u> | <u>NM_152903</u> | 8  | 4032 | ACAUUCA    | 4025 | 3 UTR | 0.0435 | 2 |
| <u>KBTBD6</u> | <u>NM_152903</u> | 8  | 4032 | ACAUUCA    | 4025 | 3 UTR | 0.0435 | 2 |
| <u>KBTBD8</u> | <u>NM_032505</u> | 8  | 1814 | ACAUUCA    | 1807 | 3 UTR | 0.0422 | 2 |
| <u>KBTBD8</u> | <u>NM_032505</u> | 8  | 1814 | ACAUUCA    | 1807 | 3 UTR | 0.0422 | 2 |
| <u>KCNA1</u>  | <u>NM_000217</u> | 9  | 7858 | AACAUUCA   | 7850 | 3 UTR | 0.0204 | 1 |
| <u>KCNA1</u>  | <u>NM_000217</u> | 9  | 7858 | AACAUUCA   | 7850 | 3 UTR | 0.0204 | 1 |
| <u>KCNA6</u>  | <u>NM_002235</u> | 9  | 5043 | AACAUUCA   | 5035 | 3 UTR | 0.0134 | 1 |
| <u>KCNA6</u>  | <u>NM_002235</u> | 9  | 5043 | AACAUUCA   | 5035 | 3 UTR | 0.0134 | 1 |
| <u>KCNB1</u>  | <u>NM_004975</u> | 9  | 3188 | AACAUUCA   | 3180 | 3 UTR | 0.0039 | 1 |
| <u>KCNB1</u>  | <u>NM_004975</u> | 8  | 3187 | ACAUUCA    | 3180 | 3 UTR | 0.0154 | 2 |
| <u>KCNB1</u>  | <u>NM_004975</u> | 9  | 3188 | AACAUUCA   | 3180 | 3 UTR | 0.0039 | 1 |
| <u>KCNB1</u>  | <u>NM_004975</u> | 8  | 3187 | ACAUUCA    | 3180 | 3 UTR | 0.0154 | 2 |
| <u>KCNE3</u>  | <u>NM_005472</u> | 8  | 1412 | AACAUUCA   | 1405 | 3 UTR | 0.0361 | 1 |
| <u>KCNE3</u>  | <u>NM_005472</u> | 8  | 1412 | AACAUUCA   | 1405 | 3 UTR | 0.0361 | 1 |
| <u>KCNG3</u>  | <u>NM_133329</u> | 9  | 3224 | AACAUUCA   | 3216 | 3 UTR | 0.0073 | 1 |
| <u>KCNG3</u>  | <u>NM_133329</u> | 8  | 3223 | ACAUUCA    | 3216 | 3 UTR | 0.0288 | 2 |
| <u>KCNG3</u>  | <u>NM_133329</u> | 9  | 3224 | AACAUUCA   | 3216 | 3 UTR | 0.0073 | 1 |

|                 |                  |   |      |           |      |       |        |   |
|-----------------|------------------|---|------|-----------|------|-------|--------|---|
| <u>KCNG3</u>    | <u>NM_133329</u> | 8 | 3223 | ACAUUCA   | 3216 | 3 UTR | 0.0288 | 2 |
| <u>KCNH8</u>    | <u>NM_144633</u> | 8 | 4170 | AACAUUCA  | 4163 | 3 UTR | 0.0239 | 1 |
| <u>KCNH8</u>    | <u>NM_144633</u> | 8 | 4170 | AACAUUCA  | 4163 | 3 UTR | 0.0239 | 1 |
| <u>KCNJ10</u>   | <u>NM_002241</u> | 8 | 4049 | ACAUUCA   | 4042 | 3 UTR | 0.0469 | 2 |
| <u>KCNJ10</u>   | <u>NM_002241</u> | 8 | 4049 | ACAUUCA   | 4042 | 3 UTR | 0.0469 | 2 |
| <u>KCNJ5</u>    | <u>NM_000890</u> | 8 | 1849 | AACAUUCA  | 1842 | 3 UTR | 0.0202 | 1 |
| <u>KCNJ5</u>    | <u>NM_000890</u> | 8 | 1849 | AACAUUCA  | 1842 | 3 UTR | 0.0202 | 1 |
| <u>KCNK10</u>   | <u>NM_138317</u> | 9 | 5178 | AACAUUCA  | 5170 | 3 UTR | 0.0206 | 1 |
| <u>KCNK10</u>   | <u>NM_138317</u> | 9 | 5178 | AACAUUCA  | 5170 | 3 UTR | 0.0206 | 1 |
| <u>KCNK5</u>    | <u>NM_003740</u> | 8 | 3176 | AACAUUCA  | 3169 | 3 UTR | 0.0291 | 1 |
| <u>KCNK5</u>    | <u>NM_003740</u> | 8 | 3176 | AACAUUCA  | 3169 | 3 UTR | 0.0291 | 1 |
| <u>KCNMB2</u>   | <u>NM_181361</u> | 8 | 1801 | AACAUUCA  | 1794 | 3 UTR | 0.0225 | 1 |
| <u>KCNMB2</u>   | <u>NM_181361</u> | 8 | 1801 | AACAUUCA  | 1794 | 3 UTR | 0.0225 | 1 |
| <u>KCNN1</u>    | <u>NM_002248</u> | 7 | 2325 | ACAUUCA   | 2319 | 3 UTR | 0.0427 | 2 |
| <u>KCNN1</u>    | <u>NM_002248</u> | 7 | 2325 | ACAUUCA   | 2319 | 3 UTR | 0.0427 | 2 |
| <u>KCNQ5</u>    | <u>NM_019842</u> | 7 | 5308 | AACAUUC   | 5302 | 3 UTR | 0.0267 | 1 |
| <u>KCNQ5</u>    | <u>NM_019842</u> | 7 | 5238 | AACAUUC   | 5232 | 3 UTR | 0.0267 | 1 |
| <u>KCNQ5</u>    | <u>NM_019842</u> | 7 | 4427 | AACAUUC   | 4421 | 3 UTR | 0.0267 | 1 |
| <u>KCNQ5</u>    | <u>NM_019842</u> | 7 | 3784 | AACAUUC   | 3778 | 3 UTR | 0.0267 | 1 |
| <u>KCNQ5</u>    | <u>NM_019842</u> | 8 | 3700 | ACAUUCA   | 3693 | 3 UTR | 0.0067 | 2 |
| <u>KCNQ5</u>    | <u>NM_019842</u> | 7 | 5308 | AACAUUC   | 5302 | 3 UTR | 0.0267 | 1 |
| <u>KCNQ5</u>    | <u>NM_019842</u> | 7 | 5238 | AACAUUC   | 5232 | 3 UTR | 0.0267 | 1 |
| <u>KCNQ5</u>    | <u>NM_019842</u> | 7 | 4427 | AACAUUC   | 4421 | 3 UTR | 0.0267 | 1 |
| <u>KCNQ5</u>    | <u>NM_019842</u> | 7 | 3784 | AACAUUC   | 3778 | 3 UTR | 0.0267 | 1 |
| <u>KCNQ5</u>    | <u>NM_019842</u> | 8 | 3700 | ACAUUCA   | 3693 | 3 UTR | 0.0067 | 2 |
| <u>KCTD10</u>   | <u>NM_031954</u> | 8 | 2859 | AACAUUCA  | 2852 | 3 UTR | 0.0451 | 1 |
| <u>KCTD10</u>   | <u>NM_031954</u> | 8 | 2859 | AACAUUCA  | 2852 | 3 UTR | 0.0451 | 1 |
| <u>KDELR3</u>   | <u>NM_006855</u> | 9 | 860  | AACAUUCA  | 852  | 3 UTR | 0.0034 | 1 |
| <u>KDELR3</u>   | <u>NM_006855</u> | 8 | 859  | ACAUUCA   | 852  | 3 UTR | 0.0137 | 2 |
| <u>KDELR3</u>   | <u>NM_006855</u> | 9 | 860  | AACAUUCA  | 852  | 3 UTR | 0.0034 | 1 |
| <u>KDELR3</u>   | <u>NM_006855</u> | 8 | 859  | ACAUUCA   | 852  | 3 UTR | 0.0137 | 2 |
| <u>KHDC1</u>    | <u>NM_030568</u> | 8 | 1080 | ACAUUCA   | 1073 | 3 UTR | 0.0035 | 2 |
| <u>KHDC1</u>    | <u>NM_030568</u> | 8 | 1080 | ACAUUCA   | 1073 | 3 UTR | 0.0035 | 2 |
| <u>KIAA0090</u> | <u>NM_015047</u> | 8 | 3325 | AACAUUCA  | 3318 | 3 UTR | 0.0186 | 1 |
| <u>KIAA0090</u> | <u>NM_015047</u> | 8 | 3325 | AACAUUCA  | 3318 | 3 UTR | 0.0186 | 1 |
| <u>KIAA0182</u> | <u>NM_014615</u> | 9 | 7317 | ACAUUCAAC | 7309 | 3 UTR | 0.0139 | 2 |
| <u>KIAA0182</u> | <u>NM_014615</u> | 9 | 7317 | ACAUUCAAC | 7309 | 3 UTR | 0.0139 | 2 |
| <u>KIAA0195</u> | <u>NM_014738</u> | 8 | 4435 | AACAUUCA  | 4428 | 3 UTR | 0.0170 | 1 |

|                 |                  |    |      |            |      |       |        |   |
|-----------------|------------------|----|------|------------|------|-------|--------|---|
| <u>KIAA0195</u> | <u>NM_014738</u> | 8  | 4596 | ACAUUCA    | 4589 | 3 UTR | 0.0170 | 2 |
| <u>KIAA0195</u> | <u>NM_014738</u> | 8  | 4435 | AACAUUCA   | 4428 | 3 UTR | 0.0170 | 1 |
| <u>KIAA0195</u> | <u>NM_014738</u> | 8  | 4596 | ACAUUCA    | 4589 | 3 UTR | 0.0170 | 2 |
| <u>KIAA0196</u> | <u>NM_014846</u> | 7  | 4073 | ACAUUCA    | 4067 | 3 UTR | 0.0220 | 2 |
| <u>KIAA0196</u> | <u>NM_014846</u> | 7  | 4073 | ACAUUCA    | 4067 | 3 UTR | 0.0220 | 2 |
| <u>KIAA0241</u> | <u>NM_015060</u> | 8  | 2237 | AACAUUCA   | 2230 | 3 UTR | 0.0040 | 1 |
| <u>KIAA0241</u> | <u>NM_015060</u> | 7  | 2236 | ACAUUCA    | 2230 | 3 UTR | 0.0157 | 2 |
| <u>KIAA0241</u> | <u>NM_015060</u> | 8  | 2237 | AACAUUCA   | 2230 | 3 UTR | 0.0040 | 1 |
| <u>KIAA0241</u> | <u>NM_015060</u> | 7  | 2236 | ACAUUCA    | 2230 | 3 UTR | 0.0157 | 2 |
| <u>KIAA0408</u> | <u>NM_014702</u> | 9  | 5252 | AACAUUCA   | 5244 | 3 UTR | 0.0133 | 1 |
| <u>KIAA0408</u> | <u>NM_014702</u> | 9  | 5252 | AACAUUCA   | 5244 | 3 UTR | 0.0133 | 1 |
| <u>KIAA0423</u> | <u>NM_015091</u> | 9  | 6034 | ACAUUCAAC  | 6026 | 3 UTR | 0.0034 | 2 |
| <u>KIAA0423</u> | <u>NM_015091</u> | 9  | 6034 | ACAUUCAAC  | 6026 | 3 UTR | 0.0034 | 2 |
| <u>KIAA0528</u> | <u>NM_014802</u> | 9  | 4182 | ACAUUCAAC  | 4174 | 3 UTR | 0.0046 | 2 |
| <u>KIAA0528</u> | <u>NM_014802</u> | 8  | 4157 | ACAUUCA    | 4150 | 3 UTR | 0.0181 | 2 |
| <u>KIAA0528</u> | <u>NM_014802</u> | 9  | 4182 | ACAUUCAAC  | 4174 | 3 UTR | 0.0046 | 2 |
| <u>KIAA0528</u> | <u>NM_014802</u> | 8  | 4157 | ACAUUCA    | 4150 | 3 UTR | 0.0181 | 2 |
| <u>KIAA0888</u> | <u>NM_015566</u> | 9  | 4685 | ACAUUCAAC  | 4677 | 3 UTR | 0.0147 | 2 |
| <u>KIAA0888</u> | <u>NM_015566</u> | 9  | 4685 | ACAUUCAAC  | 4677 | 3 UTR | 0.0147 | 2 |
| <u>KIAA0999</u> | <u>NM_025164</u> | 10 | 5952 | ACAUUCAACG | 5943 | 3 UTR | 0.0021 | 2 |
| <u>KIAA0999</u> | <u>NM_025164</u> | 10 | 5952 | ACAUUCAACG | 5943 | 3 UTR | 0.0021 | 2 |
| <u>KIAA1128</u> | <u>NM_018999</u> | 9  | 6867 | AACAUUCA   | 6859 | 3 UTR | 0.0188 | 1 |
| <u>KIAA1128</u> | <u>NM_018999</u> | 9  | 6867 | AACAUUCA   | 6859 | 3 UTR | 0.0188 | 1 |
| <u>KIAA1199</u> | <u>NM_018689</u> | 9  | 6656 | ACAUUCAAC  | 6648 | 3 UTR | 0.0104 | 2 |
| <u>KIAA1199</u> | <u>NM_018689</u> | 9  | 6656 | ACAUUCAAC  | 6648 | 3 UTR | 0.0104 | 2 |
| <u>KIAA1383</u> | <u>NM_019090</u> | 8  | 4413 | ACAUUCA    | 4406 | 3 UTR | 0.0327 | 2 |
| <u>KIAA1383</u> | <u>NM_019090</u> | 8  | 4413 | ACAUUCA    | 4406 | 3 UTR | 0.0327 | 2 |
| <u>KIF2C</u>    | <u>NM_006845</u> | 7  | 2567 | AACAUUC    | 2561 | 3 UTR | 0.0361 | 1 |
| <u>KIF2C</u>    | <u>NM_006845</u> | 7  | 2727 | ACAUUCA    | 2721 | 3 UTR | 0.0361 | 2 |
| <u>KIF2C</u>    | <u>NM_006845</u> | 7  | 2567 | AACAUUC    | 2561 | 3 UTR | 0.0361 | 1 |
| <u>KIF2C</u>    | <u>NM_006845</u> | 7  | 2727 | ACAUUCA    | 2721 | 3 UTR | 0.0361 | 2 |
| <u>KIF5A</u>    | <u>NM_004984</u> | 8  | 3613 | AACAUUCA   | 3606 | 3 UTR | 0.0090 | 1 |
| <u>KIF5A</u>    | <u>NM_004984</u> | 7  | 3612 | ACAUUCA    | 3606 | 3 UTR | 0.0354 | 2 |
| <u>KIF5A</u>    | <u>NM_004984</u> | 8  | 3613 | AACAUUCA   | 3606 | 3 UTR | 0.0090 | 1 |
| <u>KIF5A</u>    | <u>NM_004984</u> | 7  | 3612 | ACAUUCA    | 3606 | 3 UTR | 0.0354 | 2 |
| <u>KIN</u>      | <u>NM_012311</u> | 7  | 1496 | AACAUUC    | 1490 | 3 UTR | 0.0404 | 1 |
| <u>KIN</u>      | <u>NM_012311</u> | 7  | 1496 | AACAUUC    | 1490 | 3 UTR | 0.0404 | 1 |
| <u>KIR2DL1</u>  | <u>NM_014218</u> | 7  | 1238 | ACAUUCA    | 1232 | 3 UTR | 0.0308 | 2 |

|                 |                  |   |      |          |      |       |        |   |
|-----------------|------------------|---|------|----------|------|-------|--------|---|
| <u>KIR2DL1</u>  | <u>NM_014218</u> | 7 | 1238 | ACAUUCA  | 1232 | 3 UTR | 0.0308 | 2 |
| <u>KL</u>       | <u>NM_004795</u> | 8 | 4874 | AACAUUCA | 4867 | 3 UTR | 0.0295 | 1 |
| <u>KL</u>       | <u>NM_004795</u> | 8 | 4874 | AACAUUCA | 4867 | 3 UTR | 0.0295 | 1 |
| <u>KLF6</u>     | <u>NM_001300</u> | 9 | 1515 | AACAUUCA | 1507 | 3 UTR | 0.0019 | 1 |
| <u>KLF6</u>     | <u>NM_001300</u> | 8 | 1514 | ACAUUC   | 1507 | 3 UTR | 0.0076 | 2 |
| <u>KLF6</u>     | <u>NM_001300</u> | 9 | 1515 | AACAUUCA | 1507 | 3 UTR | 0.0019 | 1 |
| <u>KLF6</u>     | <u>NM_001300</u> | 8 | 1514 | ACAUUC   | 1507 | 3 UTR | 0.0076 | 2 |
| <u>KLF8</u>     | <u>NM_007250</u> | 7 | 3107 | AACAUUC  | 3101 | 3 UTR | 0.0370 | 1 |
| <u>KLF8</u>     | <u>NM_007250</u> | 7 | 3107 | AACAUUC  | 3101 | 3 UTR | 0.0370 | 1 |
| <u>KLF9</u>     | <u>NM_001206</u> | 8 | 3153 | ACAUUC   | 3146 | 3 UTR | 0.0473 | 2 |
| <u>KLF9</u>     | <u>NM_001206</u> | 8 | 3153 | ACAUUC   | 3146 | 3 UTR | 0.0473 | 2 |
| <u>KLHDC5</u>   | <u>NM_020782</u> | 9 | 2485 | ACAUUC   | 2477 | 3 UTR | 0.0185 | 2 |
| <u>KLHDC5</u>   | <u>NM_020782</u> | 9 | 2485 | ACAUUC   | 2477 | 3 UTR | 0.0185 | 2 |
| <u>KLHL5</u>    | <u>NM_015990</u> | 8 | 3404 | AACAUUCA | 3397 | 3 UTR | 0.0173 | 1 |
| <u>KLHL5</u>    | <u>NM_015990</u> | 8 | 3329 | ACAUUC   | 3322 | 3 UTR | 0.0173 | 2 |
| <u>KLHL5</u>    | <u>NM_015990</u> | 8 | 3404 | AACAUUCA | 3397 | 3 UTR | 0.0173 | 1 |
| <u>KLHL5</u>    | <u>NM_015990</u> | 8 | 3329 | ACAUUC   | 3322 | 3 UTR | 0.0173 | 2 |
| <u>KLK13</u>    | <u>NM_015596</u> | 7 | 1103 | ACAUUC   | 1097 | 3 UTR | 0.0230 | 2 |
| <u>KLK13</u>    | <u>NM_015596</u> | 7 | 1103 | ACAUUC   | 1097 | 3 UTR | 0.0230 | 2 |
| <u>KLK5</u>     | <u>NM_012427</u> | 7 | 1336 | AACAUUC  | 1330 | 3 UTR | 0.0202 | 1 |
| <u>KLK5</u>     | <u>NM_012427</u> | 7 | 1336 | AACAUUC  | 1330 | 3 UTR | 0.0202 | 1 |
| <u>KLK7</u>     | <u>NM_005046</u> | 8 | 1880 | ACAUUC   | 1873 | 3 UTR | 0.0161 | 2 |
| <u>KLK7</u>     | <u>NM_005046</u> | 8 | 1880 | ACAUUC   | 1873 | 3 UTR | 0.0161 | 2 |
| <u>KLRF1</u>    | <u>NM_016523</u> | 8 | 1231 | AACAUUCA | 1224 | 3 UTR | 0.0073 | 1 |
| <u>KLRF1</u>    | <u>NM_016523</u> | 8 | 1231 | AACAUUCA | 1224 | 3 UTR | 0.0073 | 1 |
| <u>KPNA4</u>    | <u>NM_002268</u> | 8 | 2797 | AACAUUCA | 2790 | 3 UTR | 0.0292 | 1 |
| <u>KPNA4</u>    | <u>NM_002268</u> | 8 | 2797 | AACAUUCA | 2790 | 3 UTR | 0.0292 | 1 |
| <u>KRT40</u>    | <u>NM_182497</u> | 8 | 1337 | AACAUUCA | 1330 | 3 UTR | 0.0073 | 1 |
| <u>KRT40</u>    | <u>NM_182497</u> | 7 | 1336 | ACAUUC   | 1330 | 3 UTR | 0.0289 | 2 |
| <u>KRT40</u>    | <u>NM_182497</u> | 8 | 1337 | AACAUUCA | 1330 | 3 UTR | 0.0073 | 1 |
| <u>KRT40</u>    | <u>NM_182497</u> | 7 | 1336 | ACAUUC   | 1330 | 3 UTR | 0.0289 | 2 |
| <u>KRTAP4-5</u> | <u>NM_033188</u> | 7 | 615  | ACAUUC   | 609  | 3 UTR | 0.0209 | 2 |
| <u>KRTAP4-5</u> | <u>NM_033188</u> | 7 | 615  | ACAUUC   | 609  | 3 UTR | 0.0209 | 2 |
| <u>KRTCAP2</u>  | <u>NM_173852</u> | 8 | 526  | AACAUUCA | 519  | 3 UTR | 0.0009 | 1 |
| <u>KRTCAP2</u>  | <u>NM_173852</u> | 7 | 525  | ACAUUC   | 519  | 3 UTR | 0.0038 | 2 |
| <u>KRTCAP2</u>  | <u>NM_173852</u> | 8 | 526  | AACAUUCA | 519  | 3 UTR | 0.0009 | 1 |
| <u>KRTCAP2</u>  | <u>NM_173852</u> | 7 | 525  | ACAUUC   | 519  | 3 UTR | 0.0038 | 2 |
| <u>LACE1</u>    | <u>NM_145315</u> | 7 | 1888 | ACAUUC   | 1882 | 3 UTR | 0.0377 | 2 |

|                |                     |   |       |          |       |       |        |   |
|----------------|---------------------|---|-------|----------|-------|-------|--------|---|
| <u>LACE1</u>   | <u>NM_145315</u>    | 7 | 1888  | ACAUUCA  | 1882  | 3 UTR | 0.0377 | 2 |
| <u>LAMA3</u>   | <u>NM_198129</u>    | 7 | 10338 | ACAUUC   | 10332 | 3 UTR | 0.0255 | 1 |
| <u>LAMA3</u>   | <u>NM_198129</u>    | 7 | 10338 | ACAUUC   | 10332 | 3 UTR | 0.0255 | 1 |
| <u>LAMC1</u>   | <u>NM_002293</u>    | 8 | 6593  | ACAUUCA  | 6586  | 3 UTR | 0.0419 | 1 |
| <u>LAMC1</u>   | <u>NM_002293</u>    | 8 | 6593  | ACAUUCA  | 6586  | 3 UTR | 0.0419 | 1 |
| <u>LAPTM4B</u> | <u>NM_018407</u>    | 8 | 2187  | ACAUCAA  | 2180  | 3 UTR | 0.0171 | 2 |
| <u>LAPTM4B</u> | <u>NM_018407</u>    | 8 | 2187  | ACAUCAA  | 2180  | 3 UTR | 0.0171 | 2 |
| <u>LARP4</u>   | <u>NM_199188</u>    | 9 | 5092  | ACAUCAA  | 5084  | 3 UTR | 0.0157 | 1 |
| <u>LARP4</u>   | <u>NM_199188</u>    | 9 | 5092  | ACAUCAA  | 5084  | 3 UTR | 0.0157 | 1 |
| <u>LAS1L</u>   | <u>NM_031206</u>    | 8 | 2424  | ACAUCAA  | 2417  | 3 UTR | 0.0033 | 2 |
| <u>LAS1L</u>   | <u>NM_031206</u>    | 8 | 2424  | ACAUCAA  | 2417  | 3 UTR | 0.0033 | 2 |
| <u>LASS3</u>   | <u>NM_178842</u>    | 9 | 3646  | ACAUCAA  | 3638  | 3 UTR | 0.0088 | 1 |
| <u>LASS3</u>   | <u>NM_178842</u>    | 8 | 3645  | ACAUCAA  | 3638  | 3 UTR | 0.0348 | 2 |
| <u>LASS3</u>   | <u>NM_178842</u>    | 9 | 3646  | ACAUCAA  | 3638  | 3 UTR | 0.0088 | 1 |
| <u>LASS3</u>   | <u>NM_178842</u>    | 8 | 3645  | ACAUCAA  | 3638  | 3 UTR | 0.0348 | 2 |
| <u>LATS2</u>   | <u>NM_014572</u>    | 8 | 4819  | ACAUUCA  | 4812  | 3 UTR | 0.0278 | 1 |
| <u>LATS2</u>   | <u>NM_014572</u>    | 8 | 4819  | ACAUUCA  | 4812  | 3 UTR | 0.0278 | 1 |
| <u>LBR</u>     | <u>NM_002296</u>    | 8 | 2664  | ACAUCAA  | 2657  | 3 UTR | 0.0273 | 2 |
| <u>LBR</u>     | <u>NM_002296</u>    | 8 | 2664  | ACAUCAA  | 2657  | 3 UTR | 0.0273 | 2 |
| <u>LCOR</u>    | <u>NM_032440</u>    | 8 | 2011  | ACAUUCA  | 2004  | 3 UTR | 0.0448 | 1 |
| <u>LCOR</u>    | <u>NM_032440</u>    | 8 | 2011  | ACAUUCA  | 2004  | 3 UTR | 0.0448 | 1 |
| <u>LEAP2</u>   | <u>NM_052971</u>    | 7 | 435   | ACAUUC   | 429   | 3 UTR | 0.0267 | 1 |
| <u>LEAP2</u>   | <u>NM_052971</u>    | 7 | 435   | ACAUUC   | 429   | 3 UTR | 0.0267 | 1 |
| <u>LHFPL3</u>  | <u>NM_199000</u>    | 8 | 2859  | ACAUUCA  | 2852  | 3 UTR | 0.0353 | 1 |
| <u>LHFPL3</u>  | <u>NM_199000</u>    | 8 | 1348  | ACAUUCA  | 1341  | 3 UTR | 0.0353 | 1 |
| <u>LHFPL3</u>  | <u>NM_199000</u>    | 8 | 2859  | ACAUUCA  | 2852  | 3 UTR | 0.0353 | 1 |
| <u>LHFPL3</u>  | <u>NM_199000</u>    | 8 | 1348  | ACAUUCA  | 1341  | 3 UTR | 0.0353 | 1 |
| <u>LHX3</u>    | <u>NM_014564</u>    | 8 | 2332  | ACAUUCA  | 2325  | 3 UTR | 0.0164 | 1 |
| <u>LHX3</u>    | <u>NM_014564</u>    | 8 | 2332  | ACAUUCA  | 2325  | 3 UTR | 0.0164 | 1 |
| <u>LHX6</u>    | <u>NM_014368</u>    | 8 | 2037  | ACAUUCA  | 2030  | 3 UTR | 0.0330 | 1 |
| <u>LHX6</u>    | <u>NM_014368</u>    | 8 | 2037  | ACAUUCA  | 2030  | 3 UTR | 0.0330 | 1 |
| <u>LIG4</u>    | <u>NM_002312</u>    | 8 | 3216  | ACAUCAA  | 3209  | 3 UTR | 0.0167 | 2 |
| <u>LIG4</u>    | <u>NM_002312</u>    | 8 | 3216  | ACAUCAA  | 3209  | 3 UTR | 0.0167 | 2 |
| <u>LILRB3</u>  | <u>NM_001081450</u> | 8 | 2424  | ACAUUCA  | 2417  | 3 UTR | 0.0126 | 1 |
| <u>LILRB3</u>  | <u>NM_001081450</u> | 7 | 2423  | ACAUUCA  | 2417  | 3 UTR | 0.0496 | 2 |
| <u>LILRB3</u>  | <u>NM_001081450</u> | 8 | 2424  | ACAUUCA  | 2417  | 3 UTR | 0.0126 | 1 |
| <u>LILRB3</u>  | <u>NM_001081450</u> | 7 | 2423  | ACAUUCA  | 2417  | 3 UTR | 0.0496 | 2 |
| <u>LIN7C</u>   | <u>NM_018362</u>    | 9 | 2184  | ACAUCAAC | 2176  | 3 UTR | 0.0156 | 2 |

|                  |                     |    |      |            |      |       |        |   |
|------------------|---------------------|----|------|------------|------|-------|--------|---|
| <u>LIN7C</u>     | <u>NM_018362</u>    | 9  | 2184 | ACAUUCAAC  | 2176 | 3 UTR | 0.0156 | 2 |
| <u>LMAN1</u>     | <u>NM_005570</u>    | 9  | 3841 | AACAUUCA   | 3833 | 3 UTR | 0.0124 | 1 |
| <u>LMAN1</u>     | <u>NM_005570</u>    | 8  | 1867 | AACAUUCA   | 1860 | 3 UTR | 0.0489 | 1 |
| <u>LMAN1</u>     | <u>NM_005570</u>    | 8  | 3840 | ACAUUCA    | 3833 | 3 UTR | 0.0489 | 2 |
| <u>LMAN1</u>     | <u>NM_005570</u>    | 8  | 2306 | ACAUUCA    | 2299 | 3 UTR | 0.0489 | 2 |
| <u>LMAN1</u>     | <u>NM_005570</u>    | 9  | 3841 | AACAUUCA   | 3833 | 3 UTR | 0.0124 | 1 |
| <u>LMAN1</u>     | <u>NM_005570</u>    | 8  | 1867 | AACAUUCA   | 1860 | 3 UTR | 0.0489 | 1 |
| <u>LMAN1</u>     | <u>NM_005570</u>    | 8  | 3840 | ACAUUCA    | 3833 | 3 UTR | 0.0489 | 2 |
| <u>LMAN1</u>     | <u>NM_005570</u>    | 8  | 2306 | ACAUUCA    | 2299 | 3 UTR | 0.0489 | 2 |
| <u>LMBRD2</u>    | <u>NM_001007527</u> | 7  | 3038 | ACAUUCA    | 3032 | 3 UTR | 0.0438 | 2 |
| <u>LMBRD2</u>    | <u>NM_001007527</u> | 7  | 3038 | ACAUUCA    | 3032 | 3 UTR | 0.0438 | 2 |
| <u>LMO1</u>      | <u>NM_002315</u>    | 8  | 1268 | AACAUUCA   | 1261 | 3 UTR | 0.0047 | 1 |
| <u>LMO1</u>      | <u>NM_002315</u>    | 7  | 1267 | ACAUUCA    | 1261 | 3 UTR | 0.0185 | 2 |
| <u>LMO1</u>      | <u>NM_002315</u>    | 8  | 1268 | AACAUUCA   | 1261 | 3 UTR | 0.0047 | 1 |
| <u>LMO1</u>      | <u>NM_002315</u>    | 7  | 1267 | ACAUUCA    | 1261 | 3 UTR | 0.0185 | 2 |
| <u>LMO3</u>      | <u>NM_018640</u>    | 10 | 1068 | AACAUUCAAC | 1059 | 3 UTR | 0.0027 | 1 |
| <u>LMO3</u>      | <u>NM_018640</u>    | 9  | 1067 | ACAUUCAAC  | 1059 | 3 UTR | 0.0108 | 2 |
| <u>LMO3</u>      | <u>NM_018640</u>    | 10 | 1068 | AACAUUCAAC | 1059 | 3 UTR | 0.0027 | 1 |
| <u>LMO3</u>      | <u>NM_018640</u>    | 9  | 1067 | ACAUUCAAC  | 1059 | 3 UTR | 0.0108 | 2 |
| <u>LOC196415</u> | <u>NM_001101339</u> | 8  | 957  | ACAUUCA    | 950  | 3 UTR | 0.0132 | 2 |
| <u>LOC196415</u> | <u>NM_001101339</u> | 8  | 957  | ACAUUCA    | 950  | 3 UTR | 0.0132 | 2 |
| <u>LOC389073</u> | <u>NM_001099334</u> | 7  | 1181 | AACAUUC    | 1175 | 3 UTR | 0.0286 | 1 |
| <u>LOC389073</u> | <u>NM_001099334</u> | 7  | 1181 | AACAUUC    | 1175 | 3 UTR | 0.0286 | 1 |
| <u>LOC440087</u> | <u>NM_001013698</u> | 8  | 1464 | AACAUUCA   | 1457 | 3 UTR | 0.0204 | 1 |
| <u>LOC440087</u> | <u>NM_001013698</u> | 8  | 1464 | AACAUUCA   | 1457 | 3 UTR | 0.0204 | 1 |
| <u>LOC493869</u> | <u>NM_001008397</u> | 8  | 893  | AACAUUCA   | 886  | 3 UTR | 0.0460 | 1 |
| <u>LOC493869</u> | <u>NM_001008397</u> | 8  | 893  | AACAUUCA   | 886  | 3 UTR | 0.0460 | 1 |
| <u>LOC644096</u> | <u>NM_001042631</u> | 7  | 1082 | AACAUUC    | 1076 | 3 UTR | 0.0422 | 1 |
| <u>LOC644096</u> | <u>NM_001042631</u> | 7  | 1082 | AACAUUC    | 1076 | 3 UTR | 0.0422 | 1 |
| <u>LOC729830</u> | <u>NM_001109977</u> | 8  | 3762 | AACAUUCA   | 3755 | 3 UTR | 0.0133 | 1 |
| <u>LOC729830</u> | <u>NM_001109977</u> | 8  | 3762 | AACAUUCA   | 3755 | 3 UTR | 0.0133 | 1 |
| <u>LOC751071</u> | <u>NM_001043229</u> | 8  | 1126 | AACAUUCA   | 1119 | 3 UTR | 0.0061 | 1 |
| <u>LOC751071</u> | <u>NM_001043229</u> | 7  | 1125 | ACAUUCA    | 1119 | 3 UTR | 0.0241 | 2 |
| <u>LOC751071</u> | <u>NM_001043229</u> | 8  | 1126 | AACAUUCA   | 1119 | 3 UTR | 0.0061 | 1 |
| <u>LOC751071</u> | <u>NM_001043229</u> | 7  | 1125 | ACAUUCA    | 1119 | 3 UTR | 0.0241 | 2 |
| <u>LONRF1</u>    | <u>NM_152271</u>    | 8  | 2599 | ACAUUCA    | 2592 | 3 UTR | 0.0181 | 2 |
| <u>LONRF1</u>    | <u>NM_152271</u>    | 8  | 2599 | ACAUUCA    | 2592 | 3 UTR | 0.0181 | 2 |
| <u>LPCAT2</u>    | <u>NM_017839</u>    | 7  | 5293 | ACAUUCA    | 5287 | 3 UTR | 0.0098 | 2 |



|                |                     |    |      |            |      |       |        |   |
|----------------|---------------------|----|------|------------|------|-------|--------|---|
| <u>LPCAT2</u>  | <u>NM_017839</u>    | 7  | 3836 | ACAUUCA    | 3830 | 3 UTR | 0.0098 | 2 |
| <u>LPCAT2</u>  | <u>NM_017839</u>    | 7  | 3659 | ACAUUCA    | 3653 | 3 UTR | 0.0098 | 2 |
| <u>LPCAT2</u>  | <u>NM_017839</u>    | 7  | 3344 | ACAUUCA    | 3338 | 3 UTR | 0.0098 | 2 |
| <u>LPCAT2</u>  | <u>NM_017839</u>    | 7  | 5293 | ACAUUCA    | 5287 | 3 UTR | 0.0098 | 2 |
| <u>LPCAT2</u>  | <u>NM_017839</u>    | 7  | 3836 | ACAUUCA    | 3830 | 3 UTR | 0.0098 | 2 |
| <u>LPCAT2</u>  | <u>NM_017839</u>    | 7  | 3659 | ACAUUCA    | 3653 | 3 UTR | 0.0098 | 2 |
| <u>LPCAT2</u>  | <u>NM_017839</u>    | 7  | 3344 | ACAUUCA    | 3338 | 3 UTR | 0.0098 | 2 |
| <u>LRGUK</u>   | <u>NM_144648</u>    | 7  | 2615 | AACAUUC    | 2609 | 3 UTR | 0.0125 | 1 |
| <u>LRGUK</u>   | <u>NM_144648</u>    | 7  | 2615 | AACAUUC    | 2609 | 3 UTR | 0.0125 | 1 |
| <u>LRP11</u>   | <u>NM_032832</u>    | 10 | 3290 | AACAUUCAAC | 3281 | 3 UTR | 0.0017 | 1 |
| <u>LRP11</u>   | <u>NM_032832</u>    | 9  | 3289 | ACAUUCAAC  | 3281 | 3 UTR | 0.0067 | 2 |
| <u>LRP11</u>   | <u>NM_032832</u>    | 10 | 3290 | AACAUUCAAC | 3281 | 3 UTR | 0.0017 | 1 |
| <u>LRP11</u>   | <u>NM_032832</u>    | 9  | 3289 | ACAUUCAAC  | 3281 | 3 UTR | 0.0067 | 2 |
| <u>LRP2BP</u>  | <u>NM_018409</u>    | 8  | 4260 | ACAUUCA    | 4253 | 3 UTR | 0.0491 | 2 |
| <u>LRP2BP</u>  | <u>NM_018409</u>    | 8  | 4260 | ACAUUCA    | 4253 | 3 UTR | 0.0491 | 2 |
| <u>LRP4</u>    | <u>NM_002334</u>    | 8  | 6715 | AACAUUCA   | 6708 | 3 UTR | 0.0320 | 1 |
| <u>LRP4</u>    | <u>NM_002334</u>    | 8  | 6715 | AACAUUCA   | 6708 | 3 UTR | 0.0320 | 1 |
| <u>LRR48</u>   | <u>NM_001130090</u> | 7  | 1959 | ACAUUCA    | 1953 | 3 UTR | 0.0141 | 2 |
| <u>LRR48</u>   | <u>NM_001130090</u> | 7  | 1959 | ACAUUCA    | 1953 | 3 UTR | 0.0141 | 2 |
| <u>LRR8D</u>   | <u>NM_001134479</u> | 8  | 3304 | AACAUUCA   | 3297 | 3 UTR | 0.0120 | 1 |
| <u>LRR8D</u>   | <u>NM_001134479</u> | 8  | 3164 | AACAUUCA   | 3157 | 3 UTR | 0.0120 | 1 |
| <u>LRR8D</u>   | <u>NM_001134479</u> | 7  | 3303 | ACAUUCA    | 3297 | 3 UTR | 0.0472 | 2 |
| <u>LRR8D</u>   | <u>NM_001134479</u> | 7  | 3163 | ACAUUCA    | 3157 | 3 UTR | 0.0472 | 2 |
| <u>LRR8D</u>   | <u>NM_001134479</u> | 8  | 3304 | AACAUUCA   | 3297 | 3 UTR | 0.0120 | 1 |
| <u>LRR8D</u>   | <u>NM_001134479</u> | 8  | 3164 | AACAUUCA   | 3157 | 3 UTR | 0.0120 | 1 |
| <u>LRR8D</u>   | <u>NM_001134479</u> | 7  | 3303 | ACAUUCA    | 3297 | 3 UTR | 0.0472 | 2 |
| <u>LRR8D</u>   | <u>NM_001134479</u> | 7  | 3163 | ACAUUCA    | 3157 | 3 UTR | 0.0472 | 2 |
| <u>LRRFIP1</u> | <u>NM_004735</u>    | 8  | 4283 | AACAUUCA   | 4276 | 3 UTR | 0.0270 | 1 |
| <u>LRRFIP1</u> | <u>NM_004735</u>    | 8  | 4283 | AACAUUCA   | 4276 | 3 UTR | 0.0270 | 1 |
| <u>LRRK2</u>   | <u>NM_198578</u>    | 8  | 8450 | ACAUUCA    | 8443 | 3 UTR | 0.0231 | 2 |
| <u>LRRK2</u>   | <u>NM_198578</u>    | 8  | 8450 | ACAUUCA    | 8443 | 3 UTR | 0.0231 | 2 |
| <u>LRRN1</u>   | <u>NM_020873</u>    | 9  | 3470 | AACAUUCA   | 3462 | 3 UTR | 0.0035 | 1 |
| <u>LRRN1</u>   | <u>NM_020873</u>    | 8  | 3469 | ACAUUCA    | 3462 | 3 UTR | 0.0138 | 2 |
| <u>LRRN1</u>   | <u>NM_020873</u>    | 9  | 3470 | AACAUUCA   | 3462 | 3 UTR | 0.0035 | 1 |
| <u>LRRN1</u>   | <u>NM_020873</u>    | 8  | 3469 | ACAUUCA    | 3462 | 3 UTR | 0.0138 | 2 |
| <u>LTBP2</u>   | <u>NM_000428</u>    | 9  | 6493 | ACAUUCAAC  | 6485 | 3 UTR | 0.0103 | 2 |
| <u>LTBP2</u>   | <u>NM_000428</u>    | 9  | 6493 | ACAUUCAAC  | 6485 | 3 UTR | 0.0103 | 2 |
| <u>LTV1</u>    | <u>NM_032860</u>    | 7  | 1777 | ACAUUCA    | 1771 | 3 UTR | 0.0181 | 2 |

|                |                     |   |      |          |      |       |        |   |
|----------------|---------------------|---|------|----------|------|-------|--------|---|
| <u>LTV1</u>    | <u>NM_032860</u>    | 7 | 1777 | ACAUUCA  | 1771 | 3 UTR | 0.0181 | 2 |
| <u>LYG2</u>    | <u>NM_175735</u>    | 7 | 823  | ACAUUCA  | 817  | 3 UTR | 0.0078 | 2 |
| <u>LYG2</u>    | <u>NM_175735</u>    | 7 | 823  | ACAUUCA  | 817  | 3 UTR | 0.0078 | 2 |
| <u>LYPLA2</u>  | <u>NM_007260</u>    | 7 | 1276 | ACAUUCA  | 1270 | 3 UTR | 0.0495 | 2 |
| <u>LYPLA2</u>  | <u>NM_007260</u>    | 7 | 1276 | ACAUUCA  | 1270 | 3 UTR | 0.0495 | 2 |
| <u>LYRM1</u>   | <u>NM_001128301</u> | 8 | 790  | ACAUUCA  | 783  | 3 UTR | 0.0139 | 2 |
| <u>LYRM1</u>   | <u>NM_001128301</u> | 8 | 790  | ACAUUCA  | 783  | 3 UTR | 0.0139 | 2 |
| <u>LYSMD3</u>  | <u>NM_198273</u>    | 8 | 1278 | AACAUUCA | 1271 | 3 UTR | 0.0475 | 1 |
| <u>LYSMD3</u>  | <u>NM_198273</u>    | 8 | 1278 | AACAUUCA | 1271 | 3 UTR | 0.0475 | 1 |
| <u>MAB21L2</u> | <u>NM_006439</u>    | 8 | 2589 | AACAUUCA | 2582 | 3 UTR | 0.0091 | 1 |
| <u>MAB21L2</u> | <u>NM_006439</u>    | 7 | 2588 | ACAUUCA  | 2582 | 3 UTR | 0.0360 | 2 |
| <u>MAB21L2</u> | <u>NM_006439</u>    | 8 | 2589 | AACAUUCA | 2582 | 3 UTR | 0.0091 | 1 |
| <u>MAB21L2</u> | <u>NM_006439</u>    | 7 | 2588 | ACAUUCA  | 2582 | 3 UTR | 0.0360 | 2 |
| <u>MAEL</u>    | <u>NM_032858</u>    | 7 | 1670 | AACAUUC  | 1664 | 3 UTR | 0.0214 | 1 |
| <u>MAEL</u>    | <u>NM_032858</u>    | 7 | 1670 | AACAUUC  | 1664 | 3 UTR | 0.0214 | 1 |
| <u>MAGEA4</u>  | <u>NM_002362</u>    | 7 | 1688 | ACAUUCA  | 1682 | 3 UTR | 0.0331 | 2 |
| <u>MAGEA4</u>  | <u>NM_002362</u>    | 7 | 1688 | ACAUUCA  | 1682 | 3 UTR | 0.0331 | 2 |
| <u>MAGI3</u>   | <u>NM_152900</u>    | 9 | 6009 | AACAUUCA | 6001 | 3 UTR | 0.0139 | 1 |
| <u>MAGI3</u>   | <u>NM_152900</u>    | 9 | 6009 | AACAUUCA | 6001 | 3 UTR | 0.0139 | 1 |
| <u>MALT1</u>   | <u>NM_006785</u>    | 8 | 4772 | AACAUUCA | 4765 | 3 UTR | 0.0344 | 1 |
| <u>MALT1</u>   | <u>NM_006785</u>    | 8 | 4772 | AACAUUCA | 4765 | 3 UTR | 0.0344 | 1 |
| <u>MAOA</u>    | <u>NM_000240</u>    | 9 | 3505 | AACAUUCA | 3497 | 3 UTR | 0.0088 | 1 |
| <u>MAOA</u>    | <u>NM_000240</u>    | 8 | 3504 | ACAUUCA  | 3497 | 3 UTR | 0.0349 | 2 |
| <u>MAOA</u>    | <u>NM_000240</u>    | 9 | 3505 | AACAUUCA | 3497 | 3 UTR | 0.0088 | 1 |
| <u>MAOA</u>    | <u>NM_000240</u>    | 8 | 3504 | ACAUUCA  | 3497 | 3 UTR | 0.0349 | 2 |
| <u>MAP2K1</u>  | <u>NM_002755</u>    | 8 | 2391 | ACAUUCA  | 2384 | 3 UTR | 0.0143 | 2 |
| <u>MAP2K1</u>  | <u>NM_002755</u>    | 8 | 2391 | ACAUUCA  | 2384 | 3 UTR | 0.0143 | 2 |
| <u>MAP3K10</u> | <u>NM_002446</u>    | 7 | 3192 | ACAUUCA  | 3186 | 3 UTR | 0.0166 | 2 |
| <u>MAP3K10</u> | <u>NM_002446</u>    | 7 | 3192 | ACAUUCA  | 3186 | 3 UTR | 0.0166 | 2 |
| <u>MAP3K8</u>  | <u>NM_005204</u>    | 8 | 2765 | ACAUUCA  | 2758 | 3 UTR | 0.0151 | 2 |
| <u>MAP3K8</u>  | <u>NM_005204</u>    | 8 | 2765 | ACAUUCA  | 2758 | 3 UTR | 0.0151 | 2 |
| <u>MAP3K9</u>  | <u>NM_033141</u>    | 9 | 4724 | AACAUUCA | 4716 | 3 UTR | 0.0085 | 1 |
| <u>MAP3K9</u>  | <u>NM_033141</u>    | 8 | 4723 | ACAUUCA  | 4716 | 3 UTR | 0.0337 | 2 |
| <u>MAP3K9</u>  | <u>NM_033141</u>    | 9 | 4724 | AACAUUCA | 4716 | 3 UTR | 0.0085 | 1 |
| <u>MAP3K9</u>  | <u>NM_033141</u>    | 8 | 4723 | ACAUUCA  | 4716 | 3 UTR | 0.0337 | 2 |
| <u>MAP6</u>    | <u>NM_207577</u>    | 8 | 3740 | ACAUUCA  | 3733 | 3 UTR | 0.0441 | 2 |
| <u>MAP6</u>    | <u>NM_207577</u>    | 8 | 3740 | ACAUUCA  | 3733 | 3 UTR | 0.0441 | 2 |
| <u>MAPK1</u>   | <u>NM_002745</u>    | 9 | 5172 | AACAUUCA | 5164 | 3 UTR | 0.0174 | 1 |

|               |                     |   |      |          |      |       |        |   |
|---------------|---------------------|---|------|----------|------|-------|--------|---|
| <u>MAPK1</u>  | <u>NM_002745</u>    | 9 | 5172 | AACAUUCA | 5164 | 3 UTR | 0.0174 | 1 |
| <u>MARK1</u>  | <u>NM_018650</u>    | 8 | 3048 | ACAUUCA  | 3041 | 3 UTR | 0.0346 | 2 |
| <u>MARK1</u>  | <u>NM_018650</u>    | 8 | 3048 | ACAUUCA  | 3041 | 3 UTR | 0.0346 | 2 |
| <u>MBD4</u>   | <u>NM_003925</u>    | 7 | 2092 | ACAUUCA  | 2086 | 3 UTR | 0.0331 | 2 |
| <u>MBD4</u>   | <u>NM_003925</u>    | 7 | 2092 | ACAUUCA  | 2086 | 3 UTR | 0.0331 | 2 |
| <u>MBNL2</u>  | <u>NM_144778</u>    | 8 | 3491 | ACAUUCA  | 3484 | 3 UTR | 0.0420 | 2 |
| <u>MBNL2</u>  | <u>NM_144778</u>    | 8 | 3491 | ACAUUCA  | 3484 | 3 UTR | 0.0420 | 2 |
| <u>MBTPS2</u> | <u>NM_015884</u>    | 9 | 4325 | AACAUUCA | 4317 | 3 UTR | 0.0105 | 1 |
| <u>MBTPS2</u> | <u>NM_015884</u>    | 8 | 4324 | ACAUUCA  | 4317 | 3 UTR | 0.0415 | 2 |
| <u>MBTPS2</u> | <u>NM_015884</u>    | 9 | 4325 | AACAUUCA | 4317 | 3 UTR | 0.0105 | 1 |
| <u>MBTPS2</u> | <u>NM_015884</u>    | 8 | 4324 | ACAUUCA  | 4317 | 3 UTR | 0.0415 | 2 |
| <u>MCM10</u>  | <u>NM_182751</u>    | 8 | 3855 | AACAUUCA | 3848 | 3 UTR | 0.0272 | 1 |
| <u>MCM10</u>  | <u>NM_182751</u>    | 8 | 3855 | AACAUUCA | 3848 | 3 UTR | 0.0272 | 1 |
| <u>MCM3</u>   | <u>NM_002388</u>    | 7 | 2665 | AACAUUC  | 2659 | 3 UTR | 0.0363 | 1 |
| <u>MCM3</u>   | <u>NM_002388</u>    | 7 | 2665 | AACAUUC  | 2659 | 3 UTR | 0.0363 | 1 |
| <u>MDH1B</u>  | <u>NM_001039845</u> | 7 | 1682 | ACAUUCA  | 1676 | 3 UTR | 0.0430 | 2 |
| <u>MDH1B</u>  | <u>NM_001039845</u> | 7 | 1682 | ACAUUCA  | 1676 | 3 UTR | 0.0430 | 2 |
| <u>MDM2</u>   | <u>NM_002392</u>    | 9 | 5279 | AACAUUCA | 5271 | 3 UTR | 0.0022 | 1 |
| <u>MDM2</u>   | <u>NM_002392</u>    | 8 | 5278 | ACAUUCA  | 5271 | 3 UTR | 0.0089 | 2 |
| <u>MDM2</u>   | <u>NM_002392</u>    | 9 | 5279 | AACAUUCA | 5271 | 3 UTR | 0.0022 | 1 |
| <u>MDM2</u>   | <u>NM_002392</u>    | 8 | 5278 | ACAUUCA  | 5271 | 3 UTR | 0.0089 | 2 |
| <u>ME2</u>    | <u>NM_002396</u>    | 7 | 2289 | ACAUUCA  | 2283 | 3 UTR | 0.0429 | 2 |
| <u>ME2</u>    | <u>NM_002396</u>    | 7 | 2289 | ACAUUCA  | 2283 | 3 UTR | 0.0429 | 2 |
| <u>MED10</u>  | <u>NM_032286</u>    | 7 | 963  | AACAUUC  | 957  | 3 UTR | 0.0364 | 1 |
| <u>MED10</u>  | <u>NM_032286</u>    | 7 | 963  | AACAUUC  | 957  | 3 UTR | 0.0364 | 1 |
| <u>MEGF11</u> | <u>NM_032445</u>    | 8 | 4948 | AACAUUCA | 4941 | 3 UTR | 0.0395 | 1 |
| <u>MEGF11</u> | <u>NM_032445</u>    | 8 | 4948 | AACAUUCA | 4941 | 3 UTR | 0.0395 | 1 |
| <u>MELK</u>   | <u>NM_014791</u>    | 7 | 2373 | ACAUUCA  | 2367 | 3 UTR | 0.0245 | 2 |
| <u>MELK</u>   | <u>NM_014791</u>    | 7 | 2373 | ACAUUCA  | 2367 | 3 UTR | 0.0245 | 2 |
| <u>MEPE</u>   | <u>NM_020203</u>    | 7 | 1899 | ACAUUCA  | 1893 | 3 UTR | 0.0219 | 2 |
| <u>MEPE</u>   | <u>NM_020203</u>    | 7 | 1899 | ACAUUCA  | 1893 | 3 UTR | 0.0219 | 2 |
| <u>MERTK</u>  | <u>NM_006343</u>    | 8 | 3257 | AACAUUCA | 3250 | 3 UTR | 0.0078 | 1 |
| <u>MERTK</u>  | <u>NM_006343</u>    | 7 | 3256 | ACAUUCA  | 3250 | 3 UTR | 0.0306 | 2 |
| <u>MERTK</u>  | <u>NM_006343</u>    | 8 | 3257 | AACAUUCA | 3250 | 3 UTR | 0.0078 | 1 |
| <u>MERTK</u>  | <u>NM_006343</u>    | 7 | 3256 | ACAUUCA  | 3250 | 3 UTR | 0.0306 | 2 |
| <u>METAP1</u> | <u>NM_015143</u>    | 8 | 2724 | AACAUUCA | 2717 | 3 UTR | 0.0235 | 1 |
| <u>METAP1</u> | <u>NM_015143</u>    | 8 | 2724 | AACAUUCA | 2717 | 3 UTR | 0.0235 | 1 |
| <u>METAP2</u> | <u>NM_006838</u>    | 8 | 2941 | AACAUUCA | 2934 | 3 UTR | 0.0291 | 1 |

|                 |                     |    |      |            |      |       |        |   |
|-----------------|---------------------|----|------|------------|------|-------|--------|---|
| <u>METAP2</u>   | <u>NM_006838</u>    | 9  | 2637 | ACAUUCAAC  | 2629 | 3 UTR | 0.0074 | 2 |
| <u>METAP2</u>   | <u>NM_006838</u>    | 8  | 2941 | AACAUUCA   | 2934 | 3 UTR | 0.0291 | 1 |
| <u>METAP2</u>   | <u>NM_006838</u>    | 9  | 2637 | ACAUUCAAC  | 2629 | 3 UTR | 0.0074 | 2 |
| <u>MEX3B</u>    | <u>NM_032246</u>    | 9  | 2540 | AACAUUCA   | 2532 | 3 UTR | 0.0052 | 1 |
| <u>MEX3B</u>    | <u>NM_032246</u>    | 8  | 2539 | ACAUUCA    | 2532 | 3 UTR | 0.0207 | 2 |
| <u>MEX3B</u>    | <u>NM_032246</u>    | 9  | 2540 | AACAUUCA   | 2532 | 3 UTR | 0.0052 | 1 |
| <u>MEX3B</u>    | <u>NM_032246</u>    | 8  | 2539 | ACAUUCA    | 2532 | 3 UTR | 0.0207 | 2 |
| <u>MFSD8</u>    | <u>NM_152778</u>    | 8  | 4510 | AACAUUCA   | 4503 | 3 UTR | 0.0424 | 1 |
| <u>MFSD8</u>    | <u>NM_152778</u>    | 8  | 4510 | AACAUUCA   | 4503 | 3 UTR | 0.0424 | 1 |
| <u>MGC16169</u> | <u>NM_033115</u>    | 7  | 3211 | ACAUUCA    | 3205 | 3 UTR | 0.0304 | 2 |
| <u>MGC16169</u> | <u>NM_033115</u>    | 7  | 3211 | ACAUUCA    | 3205 | 3 UTR | 0.0304 | 2 |
| <u>MGC39900</u> | <u>NM_194324</u>    | 8  | 411  | AACAUUCA   | 404  | 3 UTR | 0.0066 | 1 |
| <u>MGC39900</u> | <u>NM_194324</u>    | 7  | 410  | ACAUUCA    | 404  | 3 UTR | 0.0260 | 2 |
| <u>MGC39900</u> | <u>NM_194324</u>    | 8  | 411  | AACAUUCA   | 404  | 3 UTR | 0.0066 | 1 |
| <u>MGC39900</u> | <u>NM_194324</u>    | 7  | 410  | ACAUUCA    | 404  | 3 UTR | 0.0260 | 2 |
| <u>MIA2</u>     | <u>NM_054024</u>    | 8  | 2242 | AACAUUCA   | 2235 | 3 UTR | 0.0029 | 1 |
| <u>MIA2</u>     | <u>NM_054024</u>    | 7  | 2241 | ACAUUCA    | 2235 | 3 UTR | 0.0117 | 2 |
| <u>MIA2</u>     | <u>NM_054024</u>    | 8  | 2242 | AACAUUCA   | 2235 | 3 UTR | 0.0029 | 1 |
| <u>MIA2</u>     | <u>NM_054024</u>    | 7  | 2241 | ACAUUCA    | 2235 | 3 UTR | 0.0117 | 2 |
| <u>MID2</u>     | <u>NM_012216</u>    | 7  | 5887 | ACAUUCA    | 5881 | 3 UTR | 0.0072 | 2 |
| <u>MID2</u>     | <u>NM_012216</u>    | 7  | 3287 | ACAUUCA    | 3281 | 3 UTR | 0.0072 | 2 |
| <u>MID2</u>     | <u>NM_012216</u>    | 7  | 5887 | ACAUUCA    | 5881 | 3 UTR | 0.0072 | 2 |
| <u>MID2</u>     | <u>NM_012216</u>    | 7  | 3287 | ACAUUCA    | 3281 | 3 UTR | 0.0072 | 2 |
| <u>MINA</u>     | <u>NM_001042533</u> | 9  | 5270 | AACAUUCA   | 5262 | 3 UTR | 0.0128 | 1 |
| <u>MINA</u>     | <u>NM_001042533</u> | 9  | 5270 | AACAUUCA   | 5262 | 3 UTR | 0.0128 | 1 |
| <u>MINK1</u>    | <u>NM_153827</u>    | 8  | 4598 | ACAUUCA    | 4591 | 3 UTR | 0.0120 | 2 |
| <u>MINK1</u>    | <u>NM_153827</u>    | 8  | 4598 | ACAUUCA    | 4591 | 3 UTR | 0.0120 | 2 |
| <u>MKLN1</u>    | <u>NM_013255</u>    | 10 | 5677 | AACAUUCAAC | 5668 | 3 UTR | 0.0085 | 1 |
| <u>MKLN1</u>    | <u>NM_013255</u>    | 9  | 2671 | AACAUUCA   | 2663 | 3 UTR | 0.0335 | 1 |
| <u>MKLN1</u>    | <u>NM_013255</u>    | 9  | 5676 | ACAUUCAAC  | 5668 | 3 UTR | 0.0335 | 2 |
| <u>MKLN1</u>    | <u>NM_013255</u>    | 10 | 5677 | AACAUUCAAC | 5668 | 3 UTR | 0.0085 | 1 |
| <u>MKLN1</u>    | <u>NM_013255</u>    | 9  | 2671 | AACAUUCA   | 2663 | 3 UTR | 0.0335 | 1 |
| <u>MKLN1</u>    | <u>NM_013255</u>    | 9  | 5676 | ACAUUCAAC  | 5668 | 3 UTR | 0.0335 | 2 |
| <u>MKNK2</u>    | <u>NM_199054</u>    | 8  | 3058 | ACAUUCA    | 3051 | 3 UTR | 0.0325 | 2 |
| <u>MKNK2</u>    | <u>NM_199054</u>    | 8  | 3058 | ACAUUCA    | 3051 | 3 UTR | 0.0325 | 2 |
| <u>MLF1</u>     | <u>NM_001130157</u> | 8  | 1196 | AACAUUCA   | 1189 | 3 UTR | 0.0191 | 1 |
| <u>MLF1</u>     | <u>NM_001130157</u> | 8  | 1196 | AACAUUCA   | 1189 | 3 UTR | 0.0191 | 1 |
| <u>MLL5</u>     | <u>NM_182931</u>    | 8  | 6416 | AACAUUCA   | 6409 | 3 UTR | 0.0116 | 1 |

|                |                  |   |      |          |      |       |        |   |
|----------------|------------------|---|------|----------|------|-------|--------|---|
| <u>MLL5</u>    | <u>NM_182931</u> | 7 | 6415 | ACAUUCA  | 6409 | 3 UTR | 0.0454 | 2 |
| <u>MLL5</u>    | <u>NM_182931</u> | 8 | 6416 | AACAUUCA | 6409 | 3 UTR | 0.0116 | 1 |
| <u>MLL5</u>    | <u>NM_182931</u> | 7 | 6415 | ACAUUCA  | 6409 | 3 UTR | 0.0454 | 2 |
| <u>MLLT10</u>  | <u>NM_004641</u> | 8 | 5042 | ACAUUCA  | 5035 | 3 UTR | 0.0257 | 2 |
| <u>MLLT10</u>  | <u>NM_004641</u> | 8 | 5042 | ACAUUCA  | 5035 | 3 UTR | 0.0257 | 2 |
| <u>MMP10</u>   | <u>NM_002425</u> | 7 | 1607 | AACAUUC  | 1601 | 3 UTR | 0.0175 | 1 |
| <u>MMP10</u>   | <u>NM_002425</u> | 7 | 1607 | AACAUUC  | 1601 | 3 UTR | 0.0175 | 1 |
| <u>MMP7</u>    | <u>NM_002423</u> | 8 | 989  | ACAUUCA  | 982  | 3 UTR | 0.0045 | 2 |
| <u>MMP7</u>    | <u>NM_002423</u> | 8 | 989  | ACAUUCA  | 982  | 3 UTR | 0.0045 | 2 |
| <u>MOCS2</u>   | <u>NM_004531</u> | 7 | 1409 | AACAUUC  | 1403 | 3 UTR | 0.0331 | 1 |
| <u>MOCS2</u>   | <u>NM_004531</u> | 7 | 1409 | AACAUUC  | 1403 | 3 UTR | 0.0331 | 1 |
| <u>MORC3</u>   | <u>NM_015358</u> | 8 | 3136 | ACAUUCA  | 3129 | 3 UTR | 0.0204 | 2 |
| <u>MORC3</u>   | <u>NM_015358</u> | 8 | 3136 | ACAUUCA  | 3129 | 3 UTR | 0.0204 | 2 |
| <u>MOSC2</u>   | <u>NM_017898</u> | 9 | 1492 | AACAUUCA | 1484 | 3 UTR | 0.0016 | 1 |
| <u>MOSC2</u>   | <u>NM_017898</u> | 8 | 1491 | ACAUUCA  | 1484 | 3 UTR | 0.0063 | 2 |
| <u>MOSC2</u>   | <u>NM_017898</u> | 9 | 1492 | AACAUUCA | 1484 | 3 UTR | 0.0016 | 1 |
| <u>MOSC2</u>   | <u>NM_017898</u> | 8 | 1491 | ACAUUCA  | 1484 | 3 UTR | 0.0063 | 2 |
| <u>MPP5</u>    | <u>NM_022474</u> | 8 | 5172 | ACAUUCA  | 5165 | 3 UTR | 0.0430 | 2 |
| <u>MPP5</u>    | <u>NM_022474</u> | 8 | 5172 | ACAUUCA  | 5165 | 3 UTR | 0.0430 | 2 |
| <u>MPP7</u>    | <u>NM_173496</u> | 9 | 2509 | AACAUUCA | 2501 | 3 UTR | 0.0117 | 1 |
| <u>MPP7</u>    | <u>NM_173496</u> | 8 | 4860 | ACAUUCA  | 4853 | 3 UTR | 0.0458 | 2 |
| <u>MPP7</u>    | <u>NM_173496</u> | 8 | 2508 | ACAUUCA  | 2501 | 3 UTR | 0.0458 | 2 |
| <u>MPP7</u>    | <u>NM_173496</u> | 9 | 2509 | AACAUUCA | 2501 | 3 UTR | 0.0117 | 1 |
| <u>MPP7</u>    | <u>NM_173496</u> | 8 | 4860 | ACAUUCA  | 4853 | 3 UTR | 0.0458 | 2 |
| <u>MPP7</u>    | <u>NM_173496</u> | 8 | 2508 | ACAUUCA  | 2501 | 3 UTR | 0.0458 | 2 |
| <u>MRPS14</u>  | <u>NM_022100</u> | 8 | 670  | AACAUUCA | 663  | 3 UTR | 0.0103 | 1 |
| <u>MRPS14</u>  | <u>NM_022100</u> | 7 | 669  | ACAUUCA  | 663  | 3 UTR | 0.0405 | 2 |
| <u>MRPS14</u>  | <u>NM_022100</u> | 8 | 670  | AACAUUCA | 663  | 3 UTR | 0.0103 | 1 |
| <u>MRPS14</u>  | <u>NM_022100</u> | 7 | 669  | ACAUUCA  | 663  | 3 UTR | 0.0405 | 2 |
| <u>MRPS16</u>  | <u>NM_016065</u> | 8 | 2097 | ACAUUCA  | 2090 | 3 UTR | 0.0304 | 2 |
| <u>MRPS16</u>  | <u>NM_016065</u> | 8 | 2097 | ACAUUCA  | 2090 | 3 UTR | 0.0304 | 2 |
| <u>MRPS18B</u> | <u>NM_014046</u> | 8 | 1366 | AACAUUCA | 1359 | 3 UTR | 0.0091 | 1 |
| <u>MRPS18B</u> | <u>NM_014046</u> | 7 | 1365 | ACAUUCA  | 1359 | 3 UTR | 0.0361 | 2 |
| <u>MRPS18B</u> | <u>NM_014046</u> | 8 | 1366 | AACAUUCA | 1359 | 3 UTR | 0.0091 | 1 |
| <u>MRPS18B</u> | <u>NM_014046</u> | 7 | 1365 | ACAUUCA  | 1359 | 3 UTR | 0.0361 | 2 |
| <u>MRPS23</u>  | <u>NM_016070</u> | 8 | 656  | AACAUUCA | 649  | 3 UTR | 0.0046 | 1 |
| <u>MRPS23</u>  | <u>NM_016070</u> | 7 | 655  | ACAUUCA  | 649  | 3 UTR | 0.0183 | 2 |
| <u>MRPS23</u>  | <u>NM_016070</u> | 8 | 656  | AACAUUCA | 649  | 3 UTR | 0.0046 | 1 |

|               |                     |   |      |           |      |       |        |   |
|---------------|---------------------|---|------|-----------|------|-------|--------|---|
| <u>MRPS23</u> | <u>NM_016070</u>    | 7 | 655  | ACAUUCA   | 649  | 3 UTR | 0.0183 | 2 |
| <u>MRPS27</u> | <u>NM_015084</u>    | 8 | 2493 | AACAUUCA  | 2486 | 3 UTR | 0.0229 | 1 |
| <u>MRPS27</u> | <u>NM_015084</u>    | 8 | 2493 | AACAUUCA  | 2486 | 3 UTR | 0.0229 | 1 |
| <u>MRPS35</u> | <u>NM_021821</u>    | 8 | 1710 | ACAUUCAA  | 1703 | 3 UTR | 0.0130 | 2 |
| <u>MRPS35</u> | <u>NM_021821</u>    | 8 | 1710 | ACAUUCAA  | 1703 | 3 UTR | 0.0130 | 2 |
| <u>MRPS9</u>  | <u>NM_182640</u>    | 7 | 1451 | AACAUUC   | 1445 | 3 UTR | 0.0130 | 1 |
| <u>MRPS9</u>  | <u>NM_182640</u>    | 7 | 1451 | AACAUUC   | 1445 | 3 UTR | 0.0130 | 1 |
| <u>MS4A1</u>  | <u>NM_152866</u>    | 8 | 1473 | ACAUUCAA  | 1466 | 3 UTR | 0.0343 | 2 |
| <u>MS4A1</u>  | <u>NM_152866</u>    | 8 | 1473 | ACAUUCAA  | 1466 | 3 UTR | 0.0343 | 2 |
| <u>MSI2</u>   | <u>NM_170721</u>    | 8 | 1801 | ACAUUCAA  | 1794 | 3 UTR | 0.0205 | 2 |
| <u>MSI2</u>   | <u>NM_170721</u>    | 8 | 1801 | ACAUUCAA  | 1794 | 3 UTR | 0.0205 | 2 |
| <u>MTF2</u>   | <u>NM_007358</u>    | 9 | 3811 | AACAUUCA  | 3803 | 3 UTR | 0.0079 | 1 |
| <u>MTF2</u>   | <u>NM_007358</u>    | 8 | 3810 | ACAUUCAA  | 3803 | 3 UTR | 0.0311 | 2 |
| <u>MTF2</u>   | <u>NM_007358</u>    | 9 | 3811 | AACAUUCA  | 3803 | 3 UTR | 0.0079 | 1 |
| <u>MTF2</u>   | <u>NM_007358</u>    | 8 | 3810 | ACAUUCAA  | 3803 | 3 UTR | 0.0311 | 2 |
| <u>MTL5</u>   | <u>NM_001039656</u> | 9 | 3068 | AACAUUCA  | 3060 | 3 UTR | 0.0097 | 1 |
| <u>MTL5</u>   | <u>NM_001039656</u> | 8 | 3067 | ACAUUCAA  | 3060 | 3 UTR | 0.0384 | 2 |
| <u>MTL5</u>   | <u>NM_001039656</u> | 9 | 3068 | AACAUUCA  | 3060 | 3 UTR | 0.0097 | 1 |
| <u>MTL5</u>   | <u>NM_001039656</u> | 8 | 3067 | ACAUUCAA  | 3060 | 3 UTR | 0.0384 | 2 |
| <u>MTMR1</u>  | <u>NM_003828</u>    | 9 | 2646 | AACAUUCA  | 2638 | 3 UTR | 0.0023 | 1 |
| <u>MTMR1</u>  | <u>NM_003828</u>    | 8 | 2645 | ACAUUCAA  | 2638 | 3 UTR | 0.0091 | 2 |
| <u>MTMR1</u>  | <u>NM_003828</u>    | 9 | 2646 | AACAUUCA  | 2638 | 3 UTR | 0.0023 | 1 |
| <u>MTMR1</u>  | <u>NM_003828</u>    | 8 | 2645 | ACAUUCAA  | 2638 | 3 UTR | 0.0091 | 2 |
| <u>MTMR10</u> | <u>NM_017762</u>    | 8 | 4918 | ACAUUCAA  | 4911 | 3 UTR | 0.0380 | 2 |
| <u>MTMR10</u> | <u>NM_017762</u>    | 8 | 4918 | ACAUUCAA  | 4911 | 3 UTR | 0.0380 | 2 |
| <u>MTMR12</u> | <u>NM_001040446</u> | 9 | 3847 | AACAUUCA  | 3839 | 3 UTR | 0.0105 | 1 |
| <u>MTMR12</u> | <u>NM_001040446</u> | 9 | 3798 | AACAUUCA  | 3790 | 3 UTR | 0.0105 | 1 |
| <u>MTMR12</u> | <u>NM_001040446</u> | 9 | 4696 | ACAUUCAAC | 4688 | 3 UTR | 0.0105 | 2 |
| <u>MTMR12</u> | <u>NM_001040446</u> | 8 | 3846 | ACAUUCAA  | 3839 | 3 UTR | 0.0414 | 2 |
| <u>MTMR12</u> | <u>NM_001040446</u> | 8 | 3797 | ACAUUCAA  | 3790 | 3 UTR | 0.0414 | 2 |
| <u>MTMR12</u> | <u>NM_001040446</u> | 8 | 3408 | ACAUUCAA  | 3401 | 3 UTR | 0.0414 | 2 |
| <u>MTMR12</u> | <u>NM_001040446</u> | 9 | 3847 | AACAUUCA  | 3839 | 3 UTR | 0.0105 | 1 |
| <u>MTMR12</u> | <u>NM_001040446</u> | 9 | 3798 | AACAUUCA  | 3790 | 3 UTR | 0.0105 | 1 |
| <u>MTMR12</u> | <u>NM_001040446</u> | 9 | 4696 | ACAUUCAAC | 4688 | 3 UTR | 0.0105 | 2 |
| <u>MTMR12</u> | <u>NM_001040446</u> | 8 | 3846 | ACAUUCAA  | 3839 | 3 UTR | 0.0414 | 2 |
| <u>MTMR12</u> | <u>NM_001040446</u> | 8 | 3797 | ACAUUCAA  | 3790 | 3 UTR | 0.0414 | 2 |
| <u>MTMR12</u> | <u>NM_001040446</u> | 8 | 3408 | ACAUUCAA  | 3401 | 3 UTR | 0.0414 | 2 |
| <u>MTMR15</u> | <u>NM_014967</u>    | 8 | 4316 | AACAUUCA  | 4309 | 3 UTR | 0.0233 | 1 |

|                 |                     |   |       |           |       |       |        |   |
|-----------------|---------------------|---|-------|-----------|-------|-------|--------|---|
| <u>MTMR15</u>   | <u>NM_014967</u>    | 8 | 4316  | AACAUUCA  | 4309  | 3 UTR | 0.0233 | 1 |
| <u>MTMR6</u>    | <u>NM_004685</u>    | 9 | 4156  | AACAUUCA  | 4148  | 3 UTR | 0.0115 | 1 |
| <u>MTMR6</u>    | <u>NM_004685</u>    | 8 | 4155  | ACAUUCA   | 4148  | 3 UTR | 0.0453 | 2 |
| <u>MTMR6</u>    | <u>NM_004685</u>    | 9 | 4156  | AACAUUCA  | 4148  | 3 UTR | 0.0115 | 1 |
| <u>MTMR6</u>    | <u>NM_004685</u>    | 8 | 4155  | ACAUUCA   | 4148  | 3 UTR | 0.0453 | 2 |
| <u>MTPN</u>     | <u>NM_145808</u>    | 8 | 2123  | ACAUUCA   | 2116  | 3 UTR | 0.0475 | 2 |
| <u>MTPN</u>     | <u>NM_145808</u>    | 8 | 2123  | ACAUUCA   | 2116  | 3 UTR | 0.0475 | 2 |
| <u>MTX2</u>     | <u>NM_001006635</u> | 9 | 1273  | AACAUUCA  | 1265  | 3 UTR | 0.0014 | 1 |
| <u>MTX2</u>     | <u>NM_001006635</u> | 8 | 1272  | ACAUUCA   | 1265  | 3 UTR | 0.0057 | 2 |
| <u>MTX2</u>     | <u>NM_001006635</u> | 9 | 1273  | AACAUUCA  | 1265  | 3 UTR | 0.0014 | 1 |
| <u>MTX2</u>     | <u>NM_001006635</u> | 8 | 1272  | ACAUUCA   | 1265  | 3 UTR | 0.0057 | 2 |
| <u>MUC13</u>    | <u>NM_033049</u>    | 8 | 1727  | AACAUUCA  | 1720  | 3 UTR | 0.0212 | 1 |
| <u>MUC13</u>    | <u>NM_033049</u>    | 8 | 1727  | AACAUUCA  | 1720  | 3 UTR | 0.0212 | 1 |
| <u>MUC7</u>     | <u>NM_152291</u>    | 8 | 1649  | AACAUUCA  | 1642  | 3 UTR | 0.0173 | 1 |
| <u>MUC7</u>     | <u>NM_152291</u>    | 8 | 2217  | ACAUUCA   | 2210  | 3 UTR | 0.0173 | 2 |
| <u>MUC7</u>     | <u>NM_152291</u>    | 8 | 1649  | AACAUUCA  | 1642  | 3 UTR | 0.0173 | 1 |
| <u>MUC7</u>     | <u>NM_152291</u>    | 8 | 2217  | ACAUUCA   | 2210  | 3 UTR | 0.0173 | 2 |
| <u>MUL1</u>     | <u>NM_024544</u>    | 8 | 2349  | AACAUUCA  | 2342  | 3 UTR | 0.0190 | 1 |
| <u>MUL1</u>     | <u>NM_024544</u>    | 8 | 2349  | AACAUUCA  | 2342  | 3 UTR | 0.0190 | 1 |
| <u>MUT</u>      | <u>NM_000255</u>    | 7 | 2810  | AACAUUC   | 2804  | 3 UTR | 0.0281 | 1 |
| <u>MUT</u>      | <u>NM_000255</u>    | 7 | 2810  | AACAUUC   | 2804  | 3 UTR | 0.0281 | 1 |
| <u>MYADM</u>    | <u>NM_001020818</u> | 8 | 2961  | ACAUUCA   | 2954  | 3 UTR | 0.0295 | 2 |
| <u>MYADM</u>    | <u>NM_001020818</u> | 8 | 2961  | ACAUUCA   | 2954  | 3 UTR | 0.0295 | 2 |
| <u>MYBL1</u>    | <u>NM_001080416</u> | 9 | 3334  | ACAUUCAAC | 3326  | 3 UTR | 0.0096 | 2 |
| <u>MYBL1</u>    | <u>NM_001080416</u> | 9 | 3334  | ACAUUCAAC | 3326  | 3 UTR | 0.0096 | 2 |
| <u>MYBPC1</u>   | <u>NM_002465</u>    | 8 | 3622  | ACAUUCA   | 3615  | 3 UTR | 0.0049 | 2 |
| <u>MYBPC1</u>   | <u>NM_002465</u>    | 8 | 3622  | ACAUUCA   | 3615  | 3 UTR | 0.0049 | 2 |
| <u>MYH10</u>    | <u>NM_005964</u>    | 8 | 7033  | AACAUUCA  | 7026  | 3 UTR | 0.0240 | 1 |
| <u>MYH10</u>    | <u>NM_005964</u>    | 8 | 7033  | AACAUUCA  | 7026  | 3 UTR | 0.0240 | 1 |
| <u>MYL1</u>     | <u>NM_079420</u>    | 7 | 1050  | AACAUUC   | 1044  | 3 UTR | 0.0204 | 1 |
| <u>MYL1</u>     | <u>NM_079420</u>    | 7 | 1050  | AACAUUC   | 1044  | 3 UTR | 0.0204 | 1 |
| <u>MYO15A</u>   | <u>NM_016239</u>    | 8 | 11859 | AACAUUCA  | 11852 | 3 UTR | 0.0143 | 1 |
| <u>MYO15A</u>   | <u>NM_016239</u>    | 8 | 11859 | AACAUUCA  | 11852 | 3 UTR | 0.0143 | 1 |
| <u>MYO7B</u>    | <u>NM_001080527</u> | 7 | 6690  | AACAUUC   | 6684  | 3 UTR | 0.0188 | 1 |
| <u>MYO7B</u>    | <u>NM_001080527</u> | 7 | 6690  | AACAUUC   | 6684  | 3 UTR | 0.0188 | 1 |
| <u>MYO9B</u>    | <u>NM_001130065</u> | 8 | 7334  | ACAUUCA   | 7327  | 3 UTR | 0.0216 | 2 |
| <u>MYO9B</u>    | <u>NM_001130065</u> | 8 | 7334  | ACAUUCA   | 7327  | 3 UTR | 0.0216 | 2 |
| <u>NAALADL2</u> | <u>NM_207015</u>    | 9 | 2980  | AACAUUCA  | 2972  | 3 UTR | 0.0093 | 1 |

|                 |                  |   |      |          |      |       |        |   |
|-----------------|------------------|---|------|----------|------|-------|--------|---|
| <u>NAALADL2</u> | <u>NM_207015</u> | 8 | 2979 | ACAUUCAA | 2972 | 3 UTR | 0.0365 | 2 |
| <u>NAALADL2</u> | <u>NM_207015</u> | 9 | 2980 | AACAUUCA | 2972 | 3 UTR | 0.0093 | 1 |
| <u>NAALADL2</u> | <u>NM_207015</u> | 8 | 2979 | ACAUUCAA | 2972 | 3 UTR | 0.0365 | 2 |
| <u>NAPIL2</u>   | <u>NM_021963</u> | 7 | 1911 | AACAUUC  | 1905 | 3 UTR | 0.0488 | 1 |
| <u>NAPIL2</u>   | <u>NM_021963</u> | 7 | 1911 | AACAUUC  | 1905 | 3 UTR | 0.0488 | 1 |
| <u>NCAPG</u>    | <u>NM_022346</u> | 8 | 3852 | AACAUUCA | 3845 | 3 UTR | 0.0220 | 1 |
| <u>NCAPG</u>    | <u>NM_022346</u> | 8 | 3852 | AACAUUCA | 3845 | 3 UTR | 0.0220 | 1 |
| <u>NCAPH</u>    | <u>NM_015341</u> | 8 | 4301 | AACAUUCA | 4294 | 3 UTR | 0.0328 | 1 |
| <u>NCAPH</u>    | <u>NM_015341</u> | 8 | 4301 | AACAUUCA | 4294 | 3 UTR | 0.0328 | 1 |
| <u>NCL</u>      | <u>NM_005381</u> | 7 | 2657 | AACAUUC  | 2651 | 3 UTR | 0.0276 | 1 |
| <u>NCL</u>      | <u>NM_005381</u> | 7 | 2657 | AACAUUC  | 2651 | 3 UTR | 0.0276 | 1 |
| <u>NCOA2</u>    | <u>NM_006540</u> | 8 | 4876 | ACAUUCAA | 4869 | 3 UTR | 0.0241 | 2 |
| <u>NCOA2</u>    | <u>NM_006540</u> | 8 | 4876 | ACAUUCAA | 4869 | 3 UTR | 0.0241 | 2 |
| <u>NCOA7</u>    | <u>NM_181782</u> | 8 | 3904 | AACAUUCA | 3897 | 3 UTR | 0.0352 | 1 |
| <u>NCOA7</u>    | <u>NM_181782</u> | 8 | 3904 | AACAUUCA | 3897 | 3 UTR | 0.0352 | 1 |
| <u>NCR2</u>     | <u>NM_004828</u> | 8 | 940  | AACAUUCA | 933  | 3 UTR | 0.0004 | 1 |
| <u>NCR2</u>     | <u>NM_004828</u> | 7 | 939  | ACAUUCA  | 933  | 3 UTR | 0.0014 | 2 |
| <u>NCR2</u>     | <u>NM_004828</u> | 8 | 940  | AACAUUCA | 933  | 3 UTR | 0.0004 | 1 |
| <u>NCR2</u>     | <u>NM_004828</u> | 7 | 939  | ACAUUCA  | 933  | 3 UTR | 0.0014 | 2 |
| <u>NDUFB1</u>   | <u>NM_004545</u> | 7 | 374  | AACAUUC  | 368  | 3 UTR | 0.0051 | 1 |
| <u>NDUFB1</u>   | <u>NM_004545</u> | 7 | 374  | AACAUUC  | 368  | 3 UTR | 0.0051 | 1 |
| <u>NEBL</u>     | <u>NM_006393</u> | 9 | 7926 | AACAUUCA | 7918 | 3 UTR | 0.0218 | 1 |
| <u>NEBL</u>     | <u>NM_006393</u> | 9 | 7926 | AACAUUCA | 7918 | 3 UTR | 0.0218 | 1 |
| <u>NEK9</u>     | <u>NM_033116</u> | 7 | 4091 | ACAUUCA  | 4085 | 3 UTR | 0.0177 | 2 |
| <u>NEK9</u>     | <u>NM_033116</u> | 7 | 4091 | ACAUUCA  | 4085 | 3 UTR | 0.0177 | 2 |
| <u>NELL2</u>    | <u>NM_006159</u> | 7 | 2693 | AACAUUC  | 2687 | 3 UTR | 0.0390 | 1 |
| <u>NELL2</u>    | <u>NM_006159</u> | 7 | 2693 | AACAUUC  | 2687 | 3 UTR | 0.0390 | 1 |
| <u>NEO1</u>     | <u>NM_002499</u> | 8 | 5378 | AACAUUCA | 5371 | 3 UTR | 0.0379 | 1 |
| <u>NEO1</u>     | <u>NM_002499</u> | 8 | 5378 | AACAUUCA | 5371 | 3 UTR | 0.0379 | 1 |
| <u>NFAT5</u>    | <u>NM_138714</u> | 9 | 6729 | AACAUUCA | 6721 | 3 UTR | 0.0312 | 1 |
| <u>NFAT5</u>    | <u>NM_138714</u> | 9 | 6729 | AACAUUCA | 6721 | 3 UTR | 0.0312 | 1 |
| <u>NFYC</u>     | <u>NM_014223</u> | 7 | 1791 | ACAUUCA  | 1785 | 3 UTR | 0.0462 | 2 |
| <u>NFYC</u>     | <u>NM_014223</u> | 7 | 1791 | ACAUUCA  | 1785 | 3 UTR | 0.0462 | 2 |
| <u>NIPBL</u>    | <u>NM_015384</u> | 8 | 9756 | AACAUUCA | 9749 | 3 UTR | 0.0270 | 1 |
| <u>NIPBL</u>    | <u>NM_015384</u> | 8 | 9756 | AACAUUCA | 9749 | 3 UTR | 0.0270 | 1 |
| <u>NKTR</u>     | <u>NM_005385</u> | 8 | 6086 | ACAUUCAA | 6079 | 3 UTR | 0.0415 | 2 |
| <u>NKTR</u>     | <u>NM_005385</u> | 8 | 6086 | ACAUUCAA | 6079 | 3 UTR | 0.0415 | 2 |
| <u>NLK</u>      | <u>NM_016231</u> | 8 | 3012 | ACAUUCAA | 3005 | 3 UTR | 0.0265 | 2 |



|               |                     |   |      |          |      |       |        |   |
|---------------|---------------------|---|------|----------|------|-------|--------|---|
| <u>NLK</u>    | <u>NM_016231</u>    | 8 | 3012 | ACAUCAA  | 3005 | 3 UTR | 0.0265 | 2 |
| <u>NLN</u>    | <u>NM_020726</u>    | 7 | 2495 | ACAUCA   | 2489 | 3 UTR | 0.0389 | 2 |
| <u>NLN</u>    | <u>NM_020726</u>    | 7 | 2495 | ACAUCA   | 2489 | 3 UTR | 0.0389 | 2 |
| <u>NME6</u>   | <u>NM_005793</u>    | 7 | 823  | AACAUUC  | 817  | 3 UTR | 0.0335 | 1 |
| <u>NME6</u>   | <u>NM_005793</u>    | 7 | 823  | AACAUUC  | 817  | 3 UTR | 0.0335 | 1 |
| <u>NMT2</u>   | <u>NM_004808</u>    | 9 | 2758 | AACAUCAA | 2750 | 3 UTR | 0.0130 | 1 |
| <u>NMT2</u>   | <u>NM_004808</u>    | 9 | 2758 | AACAUCAA | 2750 | 3 UTR | 0.0130 | 1 |
| <u>NOL4</u>   | <u>NM_003787</u>    | 8 | 3078 | AACAUUCA | 3071 | 3 UTR | 0.0264 | 1 |
| <u>NOL4</u>   | <u>NM_003787</u>    | 8 | 3078 | AACAUUCA | 3071 | 3 UTR | 0.0264 | 1 |
| <u>NOL8</u>   | <u>NM_017948</u>    | 7 | 3871 | ACAUCA   | 3865 | 3 UTR | 0.0298 | 2 |
| <u>NOL8</u>   | <u>NM_017948</u>    | 7 | 3871 | ACAUCA   | 3865 | 3 UTR | 0.0298 | 2 |
| <u>NOL9</u>   | <u>NM_024654</u>    | 7 | 2269 | ACAUCA   | 2263 | 3 UTR | 0.0424 | 2 |
| <u>NOL9</u>   | <u>NM_024654</u>    | 7 | 2269 | ACAUCA   | 2263 | 3 UTR | 0.0424 | 2 |
| <u>NOS1AP</u> | <u>NM_001126060</u> | 9 | 3660 | AACAUCAA | 3652 | 3 UTR | 0.0097 | 1 |
| <u>NOS1AP</u> | <u>NM_001126060</u> | 8 | 3659 | ACAUCAA  | 3652 | 3 UTR | 0.0383 | 2 |
| <u>NOS1AP</u> | <u>NM_001126060</u> | 9 | 3660 | AACAUCAA | 3652 | 3 UTR | 0.0097 | 1 |
| <u>NOS1AP</u> | <u>NM_001126060</u> | 8 | 3659 | ACAUCAA  | 3652 | 3 UTR | 0.0383 | 2 |
| <u>NOS3</u>   | <u>NM_000603</u>    | 7 | 4192 | AACAUUC  | 4186 | 3 UTR | 0.0263 | 1 |
| <u>NOS3</u>   | <u>NM_000603</u>    | 7 | 4192 | AACAUUC  | 4186 | 3 UTR | 0.0263 | 1 |
| <u>NOTCH4</u> | <u>NM_004557</u>    | 7 | 6283 | ACAUCA   | 6277 | 3 UTR | 0.0366 | 2 |
| <u>NOTCH4</u> | <u>NM_004557</u>    | 7 | 6283 | ACAUCA   | 6277 | 3 UTR | 0.0366 | 2 |
| <u>NOVA1</u>  | <u>NM_002515</u>    | 8 | 2147 | ACAUCAA  | 2140 | 3 UTR | 0.0312 | 2 |
| <u>NOVA1</u>  | <u>NM_002515</u>    | 8 | 2147 | ACAUCAA  | 2140 | 3 UTR | 0.0312 | 2 |
| <u>NPAT</u>   | <u>NM_002519</u>    | 9 | 5067 | AACAUCAA | 5059 | 3 UTR | 0.0060 | 1 |
| <u>NPAT</u>   | <u>NM_002519</u>    | 8 | 5066 | ACAUCAA  | 5059 | 3 UTR | 0.0238 | 2 |
| <u>NPAT</u>   | <u>NM_002519</u>    | 9 | 5067 | AACAUCAA | 5059 | 3 UTR | 0.0060 | 1 |
| <u>NPAT</u>   | <u>NM_002519</u>    | 8 | 5066 | ACAUCAA  | 5059 | 3 UTR | 0.0238 | 2 |
| <u>NPFFR2</u> | <u>NM_004885</u>    | 7 | 1763 | AACAUUC  | 1757 | 3 UTR | 0.0163 | 1 |
| <u>NPFFR2</u> | <u>NM_004885</u>    | 7 | 1763 | AACAUUC  | 1757 | 3 UTR | 0.0163 | 1 |
| <u>NPM1</u>   | <u>NM_002520</u>    | 7 | 1265 | AACAUUC  | 1259 | 3 UTR | 0.0201 | 1 |
| <u>NPM1</u>   | <u>NM_002520</u>    | 7 | 1265 | AACAUUC  | 1259 | 3 UTR | 0.0201 | 1 |
| <u>NPTN</u>   | <u>NM_012428</u>    | 8 | 1627 | AACAUUCA | 1620 | 3 UTR | 0.0161 | 1 |
| <u>NPTN</u>   | <u>NM_012428</u>    | 8 | 1627 | AACAUUCA | 1620 | 3 UTR | 0.0161 | 1 |
| <u>NPTXR</u>  | <u>NM_014293</u>    | 9 | 5788 | AACAUCAA | 5780 | 3 UTR | 0.0157 | 1 |
| <u>NPTXR</u>  | <u>NM_014293</u>    | 9 | 2265 | AACAUCAA | 2257 | 3 UTR | 0.0157 | 1 |
| <u>NPTXR</u>  | <u>NM_014293</u>    | 9 | 5788 | AACAUCAA | 5780 | 3 UTR | 0.0157 | 1 |
| <u>NPTXR</u>  | <u>NM_014293</u>    | 9 | 2265 | AACAUCAA | 2257 | 3 UTR | 0.0157 | 1 |
| <u>NR1D2</u>  | <u>NM_005126</u>    | 8 | 2326 | AACAUUCA | 2319 | 3 UTR | 0.0351 | 1 |

|               |                     |    |      |            |      |       |        |   |
|---------------|---------------------|----|------|------------|------|-------|--------|---|
| <u>NR1D2</u>  | <u>NM_005126</u>    | 8  | 2326 | AACAUUCA   | 2319 | 3 UTR | 0.0351 | 1 |
| <u>NR3C1</u>  | <u>NM_001018077</u> | 9  | 5589 | AACAUUCA   | 5581 | 3 UTR | 0.0150 | 1 |
| <u>NR3C1</u>  | <u>NM_001018077</u> | 9  | 5589 | AACAUUCA   | 5581 | 3 UTR | 0.0150 | 1 |
| <u>NR4A3</u>  | <u>NM_173198</u>    | 8  | 5079 | ACAUUCA    | 5072 | 3 UTR | 0.0451 | 2 |
| <u>NR4A3</u>  | <u>NM_173198</u>    | 8  | 5079 | ACAUUCA    | 5072 | 3 UTR | 0.0451 | 2 |
| <u>NR6A1</u>  | <u>NM_033334</u>    | 9  | 1823 | ACAUUCAAC  | 1815 | 3 UTR | 0.0011 | 2 |
| <u>NR6A1</u>  | <u>NM_033334</u>    | 9  | 1823 | ACAUUCAAC  | 1815 | 3 UTR | 0.0011 | 2 |
| <u>NRAS</u>   | <u>NM_002524</u>    | 10 | 4391 | AACAUUCAAC | 4382 | 3 UTR | 0.0035 | 1 |
| <u>NRAS</u>   | <u>NM_002524</u>    | 9  | 4390 | ACAUUCAAC  | 4382 | 3 UTR | 0.0138 | 2 |
| <u>NRAS</u>   | <u>NM_002524</u>    | 10 | 4391 | AACAUUCAAC | 4382 | 3 UTR | 0.0035 | 1 |
| <u>NRAS</u>   | <u>NM_002524</u>    | 9  | 4390 | ACAUUCAAC  | 4382 | 3 UTR | 0.0138 | 2 |
| <u>NSF</u>    | <u>NM_006178</u>    | 8  | 2705 | AACAUUCA   | 2698 | 3 UTR | 0.0248 | 1 |
| <u>NSF</u>    | <u>NM_006178</u>    | 8  | 2705 | AACAUUCA   | 2698 | 3 UTR | 0.0248 | 1 |
| <u>NSL1</u>   | <u>NM_001042549</u> | 9  | 4633 | AACAUUCA   | 4625 | 3 UTR | 0.0468 | 1 |
| <u>NSL1</u>   | <u>NM_001042549</u> | 9  | 4633 | AACAUUCA   | 4625 | 3 UTR | 0.0468 | 1 |
| <u>NSMAF</u>  | <u>NM_003580</u>    | 7  | 3050 | ACAUUCA    | 3044 | 3 UTR | 0.0368 | 2 |
| <u>NSMAF</u>  | <u>NM_003580</u>    | 7  | 3050 | ACAUUCA    | 3044 | 3 UTR | 0.0368 | 2 |
| <u>NSUN7</u>  | <u>NM_024677</u>    | 8  | 3596 | ACAUUCA    | 3589 | 3 UTR | 0.0160 | 2 |
| <u>NSUN7</u>  | <u>NM_024677</u>    | 8  | 3596 | ACAUUCA    | 3589 | 3 UTR | 0.0160 | 2 |
| <u>NTS</u>    | <u>NM_006183</u>    | 8  | 1023 | AACAUUCA   | 1016 | 3 UTR | 0.0094 | 1 |
| <u>NTS</u>    | <u>NM_006183</u>    | 8  | 748  | ACAUUCA    | 741  | 3 UTR | 0.0094 | 2 |
| <u>NTS</u>    | <u>NM_006183</u>    | 8  | 1023 | AACAUUCA   | 1016 | 3 UTR | 0.0094 | 1 |
| <u>NTS</u>    | <u>NM_006183</u>    | 8  | 748  | ACAUUCA    | 741  | 3 UTR | 0.0094 | 2 |
| <u>NTSR2</u>  | <u>NM_012344</u>    | 7  | 1311 | ACAUUCA    | 1305 | 3 UTR | 0.0190 | 2 |
| <u>NTSR2</u>  | <u>NM_012344</u>    | 7  | 1311 | ACAUUCA    | 1305 | 3 UTR | 0.0190 | 2 |
| <u>NUBP1</u>  | <u>NM_002484</u>    | 7  | 1000 | AACAUUC    | 994  | 3 UTR | 0.0169 | 1 |
| <u>NUBP1</u>  | <u>NM_002484</u>    | 7  | 1000 | AACAUUC    | 994  | 3 UTR | 0.0169 | 1 |
| <u>NUFIP1</u> | <u>NM_012345</u>    | 9  | 2092 | AACAUUCA   | 2084 | 3 UTR | 0.0074 | 1 |
| <u>NUFIP1</u> | <u>NM_012345</u>    | 8  | 2091 | ACAUUCA    | 2084 | 3 UTR | 0.0294 | 2 |
| <u>NUFIP1</u> | <u>NM_012345</u>    | 9  | 2092 | AACAUUCA   | 2084 | 3 UTR | 0.0074 | 1 |
| <u>NUFIP1</u> | <u>NM_012345</u>    | 8  | 2091 | ACAUUCA    | 2084 | 3 UTR | 0.0294 | 2 |
| <u>NUP50</u>  | <u>NM_007172</u>    | 9  | 3067 | AACAUUCA   | 3059 | 3 UTR | 0.0127 | 1 |
| <u>NUP50</u>  | <u>NM_007172</u>    | 8  | 3066 | ACAUUCA    | 3059 | 3 UTR | 0.0499 | 2 |
| <u>NUP50</u>  | <u>NM_007172</u>    | 9  | 3067 | AACAUUCA   | 3059 | 3 UTR | 0.0127 | 1 |
| <u>NUP50</u>  | <u>NM_007172</u>    | 8  | 3066 | ACAUUCA    | 3059 | 3 UTR | 0.0499 | 2 |
| <u>OCA2</u>   | <u>NM_000275</u>    | 7  | 2800 | AACAUUC    | 2794 | 3 UTR | 0.0317 | 1 |
| <u>OCA2</u>   | <u>NM_000275</u>    | 7  | 2800 | AACAUUC    | 2794 | 3 UTR | 0.0317 | 1 |
| <u>OGFRL1</u> | <u>NM_024576</u>    | 7  | 1731 | ACAUUCA    | 1725 | 3 UTR | 0.0143 | 2 |

|                 |                     |   |      |           |      |       |        |   |
|-----------------|---------------------|---|------|-----------|------|-------|--------|---|
| <u>OGFRL1</u>   | <u>NM_024576</u>    | 7 | 1731 | ACAUUCA   | 1725 | 3 UTR | 0.0143 | 2 |
| <u>OMA1</u>     | <u>NM_145243</u>    | 7 | 1701 | AACAUUC   | 1695 | 3 UTR | 0.0160 | 1 |
| <u>OMA1</u>     | <u>NM_145243</u>    | 7 | 1701 | AACAUUC   | 1695 | 3 UTR | 0.0160 | 1 |
| <u>OPN5</u>     | <u>NM_181744</u>    | 9 | 2680 | AACAUUCA  | 2672 | 3 UTR | 0.0091 | 1 |
| <u>OPN5</u>     | <u>NM_181744</u>    | 8 | 2679 | ACAUUCA   | 2672 | 3 UTR | 0.0360 | 2 |
| <u>OPN5</u>     | <u>NM_181744</u>    | 9 | 2680 | AACAUUCA  | 2672 | 3 UTR | 0.0091 | 1 |
| <u>OPN5</u>     | <u>NM_181744</u>    | 8 | 2679 | ACAUUCA   | 2672 | 3 UTR | 0.0360 | 2 |
| <u>OR51E2</u>   | <u>NM_030774</u>    | 8 | 2724 | ACAUUCA   | 2717 | 3 UTR | 0.0240 | 2 |
| <u>OR51E2</u>   | <u>NM_030774</u>    | 8 | 2724 | ACAUUCA   | 2717 | 3 UTR | 0.0240 | 2 |
| <u>OSBPL2</u>   | <u>NM_144498</u>    | 9 | 3909 | AACAUUCA  | 3901 | 3 UTR | 0.0088 | 1 |
| <u>OSBPL2</u>   | <u>NM_144498</u>    | 8 | 3908 | ACAUUCA   | 3901 | 3 UTR | 0.0349 | 2 |
| <u>OSBPL2</u>   | <u>NM_144498</u>    | 9 | 3909 | AACAUUCA  | 3901 | 3 UTR | 0.0088 | 1 |
| <u>OSBPL2</u>   | <u>NM_144498</u>    | 8 | 3908 | ACAUUCA   | 3901 | 3 UTR | 0.0349 | 2 |
| <u>OSBPL3</u>   | <u>NM_015550</u>    | 9 | 3333 | AACAUUCA  | 3325 | 3 UTR | 0.0139 | 1 |
| <u>OSBPL3</u>   | <u>NM_015550</u>    | 9 | 6690 | ACAUUCAAC | 6682 | 3 UTR | 0.0139 | 2 |
| <u>OSBPL3</u>   | <u>NM_015550</u>    | 9 | 3333 | AACAUUCA  | 3325 | 3 UTR | 0.0139 | 1 |
| <u>OSBPL3</u>   | <u>NM_015550</u>    | 9 | 6690 | ACAUUCAAC | 6682 | 3 UTR | 0.0139 | 2 |
| <u>OSBPL8</u>   | <u>NM_020841</u>    | 9 | 5476 | AACAUUCA  | 5468 | 3 UTR | 0.0156 | 1 |
| <u>OSBPL8</u>   | <u>NM_020841</u>    | 9 | 5476 | AACAUUCA  | 5468 | 3 UTR | 0.0156 | 1 |
| <u>OTUB2</u>    | <u>NM_023112</u>    | 8 | 1374 | ACAUUCA   | 1367 | 3 UTR | 0.0449 | 2 |
| <u>OTUB2</u>    | <u>NM_023112</u>    | 8 | 1374 | ACAUUCA   | 1367 | 3 UTR | 0.0449 | 2 |
| <u>OXGR1</u>    | <u>NM_080818</u>    | 8 | 1937 | ACAUUCA   | 1930 | 3 UTR | 0.0155 | 2 |
| <u>OXGR1</u>    | <u>NM_080818</u>    | 8 | 1937 | ACAUUCA   | 1930 | 3 UTR | 0.0155 | 2 |
| <u>P4HA2</u>    | <u>NM_004199</u>    | 8 | 2286 | AACAUUCA  | 2279 | 3 UTR | 0.0063 | 1 |
| <u>P4HA2</u>    | <u>NM_004199</u>    | 7 | 2285 | ACAUUCA   | 2279 | 3 UTR | 0.0251 | 2 |
| <u>P4HA2</u>    | <u>NM_004199</u>    | 8 | 2286 | AACAUUCA  | 2279 | 3 UTR | 0.0063 | 1 |
| <u>P4HA2</u>    | <u>NM_004199</u>    | 7 | 2285 | ACAUUCA   | 2279 | 3 UTR | 0.0251 | 2 |
| <u>P76</u>      | <u>NM_173542</u>    | 7 | 2415 | ACAUUCA   | 2409 | 3 UTR | 0.0468 | 2 |
| <u>P76</u>      | <u>NM_173542</u>    | 7 | 2415 | ACAUUCA   | 2409 | 3 UTR | 0.0468 | 2 |
| <u>PABPC4L</u>  | <u>NM_001114734</u> | 9 | 3776 | AACAUUCA  | 3768 | 3 UTR | 0.0135 | 1 |
| <u>PABPC4L</u>  | <u>NM_001114734</u> | 9 | 3776 | AACAUUCA  | 3768 | 3 UTR | 0.0135 | 1 |
| <u>PABPC5</u>   | <u>NM_080832</u>    | 8 | 2069 | AACAUUCA  | 2062 | 3 UTR | 0.0280 | 1 |
| <u>PABPC5</u>   | <u>NM_080832</u>    | 8 | 2069 | AACAUUCA  | 2062 | 3 UTR | 0.0280 | 1 |
| <u>PAFAH1B2</u> | <u>NM_002572</u>    | 7 | 898  | AACAUUC   | 892  | 3 UTR | 0.0241 | 1 |
| <u>PAFAH1B2</u> | <u>NM_002572</u>    | 7 | 898  | AACAUUC   | 892  | 3 UTR | 0.0241 | 1 |
| <u>PAG1</u>     | <u>NM_018440</u>    | 9 | 5698 | AACAUUCA  | 5690 | 3 UTR | 0.0328 | 1 |
| <u>PAG1</u>     | <u>NM_018440</u>    | 9 | 5698 | AACAUUCA  | 5690 | 3 UTR | 0.0328 | 1 |
| <u>PAK4</u>     | <u>NM_001014831</u> | 7 | 2737 | ACAUUCA   | 2731 | 3 UTR | 0.0492 | 2 |

|               |                     |    |      |             |      |       |        |   |
|---------------|---------------------|----|------|-------------|------|-------|--------|---|
| <u>PAK4</u>   | <u>NM_001014831</u> | 7  | 2737 | ACAUUCA     | 2731 | 3 UTR | 0.0492 | 2 |
| <u>PAN3</u>   | <u>NM_175854</u>    | 8  | 3415 | AACAUUCA    | 3408 | 3 UTR | 0.0420 | 1 |
| <u>PAN3</u>   | <u>NM_175854</u>    | 8  | 3415 | AACAUUCA    | 3408 | 3 UTR | 0.0420 | 1 |
| <u>PANK2</u>  | <u>NM_153638</u>    | 7  | 2084 | ACAUUCA     | 2078 | 3 UTR | 0.0337 | 2 |
| <u>PANK2</u>  | <u>NM_153638</u>    | 7  | 2084 | ACAUUCA     | 2078 | 3 UTR | 0.0337 | 2 |
| <u>PANK3</u>  | <u>NM_024594</u>    | 8  | 1538 | AACAUUCA    | 1531 | 3 UTR | 0.0293 | 1 |
| <u>PANK3</u>  | <u>NM_024594</u>    | 8  | 1538 | AACAUUCA    | 1531 | 3 UTR | 0.0293 | 1 |
| <u>PAP2D</u>  | <u>NM_001037317</u> | 8  | 3117 | ACAUUCA     | 3110 | 3 UTR | 0.0423 | 2 |
| <u>PAP2D</u>  | <u>NM_001037317</u> | 8  | 3117 | ACAUUCA     | 3110 | 3 UTR | 0.0423 | 2 |
| <u>PAPD5</u>  | <u>NM_001040284</u> | 11 | 5833 | AACAUUCAACG | 5823 | 3 UTR | 0.0014 | 1 |
| <u>PAPD5</u>  | <u>NM_001040284</u> | 10 | 5832 | ACAUUCAACG  | 5823 | 3 UTR | 0.0057 | 2 |
| <u>PAPD5</u>  | <u>NM_001040284</u> | 11 | 5833 | AACAUUCAACG | 5823 | 3 UTR | 0.0014 | 1 |
| <u>PAPD5</u>  | <u>NM_001040284</u> | 10 | 5832 | ACAUUCAACG  | 5823 | 3 UTR | 0.0057 | 2 |
| <u>PARD6B</u> | <u>NM_032521</u>    | 9  | 1380 | AACAUUCA    | 1372 | 3 UTR | 0.0124 | 1 |
| <u>PARD6B</u> | <u>NM_032521</u>    | 8  | 1379 | ACAUUCA     | 1372 | 3 UTR | 0.0486 | 2 |
| <u>PARD6B</u> | <u>NM_032521</u>    | 9  | 1380 | AACAUUCA    | 1372 | 3 UTR | 0.0124 | 1 |
| <u>PARD6B</u> | <u>NM_032521</u>    | 8  | 1379 | ACAUUCA     | 1372 | 3 UTR | 0.0486 | 2 |
| <u>PARD6G</u> | <u>NM_032510</u>    | 8  | 3537 | ACAUUCA     | 3530 | 3 UTR | 0.0382 | 2 |
| <u>PARD6G</u> | <u>NM_032510</u>    | 8  | 3537 | ACAUUCA     | 3530 | 3 UTR | 0.0382 | 2 |
| <u>PARK2</u>  | <u>NM_004562</u>    | 10 | 2242 | AACAUUCAAC  | 2233 | 3 UTR | 0.0024 | 1 |
| <u>PARK2</u>  | <u>NM_004562</u>    | 9  | 2235 | AACAUUCA    | 2227 | 3 UTR | 0.0096 | 1 |
| <u>PARK2</u>  | <u>NM_004562</u>    | 9  | 2241 | ACAUUCAAC   | 2233 | 3 UTR | 0.0096 | 2 |
| <u>PARK2</u>  | <u>NM_004562</u>    | 8  | 2234 | ACAUUCA     | 2227 | 3 UTR | 0.0380 | 2 |
| <u>PARK2</u>  | <u>NM_004562</u>    | 10 | 2242 | AACAUUCAAC  | 2233 | 3 UTR | 0.0024 | 1 |
| <u>PARK2</u>  | <u>NM_004562</u>    | 9  | 2235 | AACAUUCA    | 2227 | 3 UTR | 0.0096 | 1 |
| <u>PARK2</u>  | <u>NM_004562</u>    | 9  | 2241 | ACAUUCAAC   | 2233 | 3 UTR | 0.0096 | 2 |
| <u>PARK2</u>  | <u>NM_004562</u>    | 8  | 2234 | ACAUUCA     | 2227 | 3 UTR | 0.0380 | 2 |
| <u>PARP2</u>  | <u>NM_005484</u>    | 8  | 1785 | AACAUUCA    | 1778 | 3 UTR | 0.0019 | 1 |
| <u>PARP2</u>  | <u>NM_005484</u>    | 7  | 1784 | ACAUUCA     | 1778 | 3 UTR | 0.0075 | 2 |
| <u>PARP2</u>  | <u>NM_005484</u>    | 8  | 1785 | AACAUUCA    | 1778 | 3 UTR | 0.0019 | 1 |
| <u>PARP2</u>  | <u>NM_005484</u>    | 7  | 1784 | ACAUUCA     | 1778 | 3 UTR | 0.0075 | 2 |
| <u>PAWR</u>   | <u>NM_002583</u>    | 9  | 1361 | AACAUUCA    | 1353 | 3 UTR | 0.0025 | 1 |
| <u>PAWR</u>   | <u>NM_002583</u>    | 8  | 1360 | ACAUUCA     | 1353 | 3 UTR | 0.0100 | 2 |
| <u>PAWR</u>   | <u>NM_002583</u>    | 9  | 1361 | AACAUUCA    | 1353 | 3 UTR | 0.0025 | 1 |
| <u>PAWR</u>   | <u>NM_002583</u>    | 8  | 1360 | ACAUUCA     | 1353 | 3 UTR | 0.0100 | 2 |
| <u>PAX5</u>   | <u>NM_016734</u>    | 8  | 2475 | ACAUUCA     | 2468 | 3 UTR | 0.0304 | 2 |
| <u>PAX5</u>   | <u>NM_016734</u>    | 8  | 2475 | ACAUUCA     | 2468 | 3 UTR | 0.0304 | 2 |
| <u>PBRM1</u>  | <u>NM_018313</u>    | 9  | 7408 | AACAUUCA    | 7400 | 3 UTR | 0.0104 | 1 |

|                |                     |    |      |            |      |       |        |   |
|----------------|---------------------|----|------|------------|------|-------|--------|---|
| <u>PBRM1</u>   | <u>NM_018313</u>    | 8  | 7407 | ACAUCAA    | 7400 | 3 UTR | 0.0408 | 2 |
| <u>PBRM1</u>   | <u>NM_018313</u>    | 9  | 7408 | AACAUCAA   | 7400 | 3 UTR | 0.0104 | 1 |
| <u>PBRM1</u>   | <u>NM_018313</u>    | 8  | 7407 | ACAUCAA    | 7400 | 3 UTR | 0.0408 | 2 |
| <u>PBX3</u>    | <u>NM_006195</u>    | 9  | 2562 | AACAUCAA   | 2554 | 3 UTR | 0.0057 | 1 |
| <u>PBX3</u>    | <u>NM_006195</u>    | 8  | 2561 | ACAUCAA    | 2554 | 3 UTR | 0.0225 | 2 |
| <u>PBX3</u>    | <u>NM_006195</u>    | 9  | 2562 | AACAUCAA   | 2554 | 3 UTR | 0.0057 | 1 |
| <u>PBX3</u>    | <u>NM_006195</u>    | 8  | 2561 | ACAUCAA    | 2554 | 3 UTR | 0.0225 | 2 |
| <u>PCAF</u>    | <u>NM_003884</u>    | 8  | 3318 | AACAUUCA   | 3311 | 3 UTR | 0.0283 | 1 |
| <u>PCAF</u>    | <u>NM_003884</u>    | 8  | 3318 | AACAUUCA   | 3311 | 3 UTR | 0.0283 | 1 |
| <u>PCBP1</u>   | <u>NM_006196</u>    | 7  | 1646 | AACAUUC    | 1640 | 3 UTR | 0.0233 | 1 |
| <u>PCBP1</u>   | <u>NM_006196</u>    | 7  | 1646 | AACAUUC    | 1640 | 3 UTR | 0.0233 | 1 |
| <u>PCDH11X</u> | <u>NM_032968</u>    | 9  | 6846 | AACAUCAA   | 6838 | 3 UTR | 0.0162 | 1 |
| <u>PCDH11X</u> | <u>NM_032968</u>    | 9  | 6846 | AACAUCAA   | 6838 | 3 UTR | 0.0162 | 1 |
| <u>PCDH11Y</u> | <u>NM_032973</u>    | 9  | 8433 | AACAUCAA   | 8425 | 3 UTR | 0.0163 | 1 |
| <u>PCDH11Y</u> | <u>NM_032973</u>    | 9  | 6708 | AACAUCAA   | 6700 | 3 UTR | 0.0163 | 1 |
| <u>PCDH11Y</u> | <u>NM_032973</u>    | 9  | 8433 | AACAUCAA   | 8425 | 3 UTR | 0.0163 | 1 |
| <u>PCDH11Y</u> | <u>NM_032973</u>    | 9  | 6708 | AACAUCAA   | 6700 | 3 UTR | 0.0163 | 1 |
| <u>PCDH15</u>  | <u>NM_033056</u>    | 8  | 6647 | AACAUUCA   | 6640 | 3 UTR | 0.0115 | 1 |
| <u>PCDH15</u>  | <u>NM_033056</u>    | 7  | 6646 | ACAUCA     | 6640 | 3 UTR | 0.0452 | 2 |
| <u>PCDH15</u>  | <u>NM_033056</u>    | 8  | 6647 | AACAUUCA   | 6640 | 3 UTR | 0.0115 | 1 |
| <u>PCDH15</u>  | <u>NM_033056</u>    | 7  | 6646 | ACAUCA     | 6640 | 3 UTR | 0.0452 | 2 |
| <u>PCDH19</u>  | <u>NM_001105243</u> | 10 | 8384 | AACAUUCAAC | 8375 | 3 UTR | 0.0044 | 1 |
| <u>PCDH19</u>  | <u>NM_001105243</u> | 9  | 6730 | AACAUCAA   | 6722 | 3 UTR | 0.0176 | 1 |
| <u>PCDH19</u>  | <u>NM_001105243</u> | 9  | 8383 | ACAUCAAC   | 8375 | 3 UTR | 0.0176 | 2 |
| <u>PCDH19</u>  | <u>NM_001105243</u> | 10 | 8384 | AACAUUCAAC | 8375 | 3 UTR | 0.0044 | 1 |
| <u>PCDH19</u>  | <u>NM_001105243</u> | 9  | 6730 | AACAUCAA   | 6722 | 3 UTR | 0.0176 | 1 |
| <u>PCDH19</u>  | <u>NM_001105243</u> | 9  | 8383 | ACAUCAAC   | 8375 | 3 UTR | 0.0176 | 2 |
| <u>PCDHA10</u> | <u>NM_018901</u>    | 8  | 4329 | AACAUUCA   | 4322 | 3 UTR | 0.0361 | 1 |
| <u>PCDHA10</u> | <u>NM_018901</u>    | 9  | 4376 | ACAUCAAC   | 4368 | 3 UTR | 0.0091 | 2 |
| <u>PCDHA10</u> | <u>NM_018901</u>    | 8  | 4329 | AACAUUCA   | 4322 | 3 UTR | 0.0361 | 1 |
| <u>PCDHA10</u> | <u>NM_018901</u>    | 9  | 4376 | ACAUCAAC   | 4368 | 3 UTR | 0.0091 | 2 |
| <u>PCDHA2</u>  | <u>NM_018905</u>    | 8  | 4435 | AACAUUCA   | 4428 | 3 UTR | 0.0361 | 1 |
| <u>PCDHA2</u>  | <u>NM_018905</u>    | 9  | 4482 | ACAUCAAC   | 4474 | 3 UTR | 0.0091 | 2 |
| <u>PCDHA2</u>  | <u>NM_018905</u>    | 8  | 4435 | AACAUUCA   | 4428 | 3 UTR | 0.0361 | 1 |
| <u>PCDHA2</u>  | <u>NM_018905</u>    | 9  | 4482 | ACAUCAAC   | 4474 | 3 UTR | 0.0091 | 2 |
| <u>PCDHA5</u>  | <u>NM_018908</u>    | 8  | 4293 | AACAUUCA   | 4286 | 3 UTR | 0.0361 | 1 |
| <u>PCDHA5</u>  | <u>NM_018908</u>    | 9  | 4340 | ACAUCAAC   | 4332 | 3 UTR | 0.0091 | 2 |
| <u>PCDHA5</u>  | <u>NM_018908</u>    | 8  | 4293 | AACAUUCA   | 4286 | 3 UTR | 0.0361 | 1 |

|                |                  |   |      |           |      |       |        |   |
|----------------|------------------|---|------|-----------|------|-------|--------|---|
| <u>PCDHA5</u>  | <u>NM_018908</u> | 9 | 4340 | ACAUUCAAC | 4332 | 3 UTR | 0.0091 | 2 |
| <u>PCDHA6</u>  | <u>NM_018909</u> | 8 | 4362 | AACAUUCA  | 4355 | 3 UTR | 0.0361 | 1 |
| <u>PCDHA6</u>  | <u>NM_018909</u> | 9 | 4409 | ACAUUCAAC | 4401 | 3 UTR | 0.0091 | 2 |
| <u>PCDHA6</u>  | <u>NM_018909</u> | 8 | 4362 | AACAUUCA  | 4355 | 3 UTR | 0.0361 | 1 |
| <u>PCDHA6</u>  | <u>NM_018909</u> | 9 | 4409 | ACAUUCAAC | 4401 | 3 UTR | 0.0091 | 2 |
| <u>PCDHA9</u>  | <u>NM_014005</u> | 9 | 5967 | AACAUUCA  | 5959 | 3 UTR | 0.0119 | 1 |
| <u>PCDHA9</u>  | <u>NM_014005</u> | 8 | 5966 | ACAUUCA   | 5959 | 3 UTR | 0.0467 | 2 |
| <u>PCDHA9</u>  | <u>NM_014005</u> | 9 | 5967 | AACAUUCA  | 5959 | 3 UTR | 0.0119 | 1 |
| <u>PCDHA9</u>  | <u>NM_014005</u> | 8 | 5966 | ACAUUCA   | 5959 | 3 UTR | 0.0467 | 2 |
| <u>PCDHAC1</u> | <u>NM_018898</u> | 8 | 4550 | AACAUUCA  | 4543 | 3 UTR | 0.0361 | 1 |
| <u>PCDHAC1</u> | <u>NM_018898</u> | 9 | 4597 | ACAUUCAAC | 4589 | 3 UTR | 0.0091 | 2 |
| <u>PCDHAC1</u> | <u>NM_018898</u> | 8 | 4550 | AACAUUCA  | 4543 | 3 UTR | 0.0361 | 1 |
| <u>PCDHAC1</u> | <u>NM_018898</u> | 9 | 4597 | ACAUUCAAC | 4589 | 3 UTR | 0.0091 | 2 |
| <u>PCDHAC2</u> | <u>NM_018899</u> | 8 | 4746 | AACAUUCA  | 4739 | 3 UTR | 0.0363 | 1 |
| <u>PCDHAC2</u> | <u>NM_018899</u> | 9 | 4793 | ACAUUCAAC | 4785 | 3 UTR | 0.0092 | 2 |
| <u>PCDHAC2</u> | <u>NM_018899</u> | 8 | 4746 | AACAUUCA  | 4739 | 3 UTR | 0.0363 | 1 |
| <u>PCDHAC2</u> | <u>NM_018899</u> | 9 | 4793 | ACAUUCAAC | 4785 | 3 UTR | 0.0092 | 2 |
| <u>PCDHB3</u>  | <u>NM_018937</u> | 8 | 2583 | AACAUUCA  | 2576 | 3 UTR | 0.0119 | 1 |
| <u>PCDHB3</u>  | <u>NM_018937</u> | 7 | 2582 | ACAUUCA   | 2576 | 3 UTR | 0.0466 | 2 |
| <u>PCDHB3</u>  | <u>NM_018937</u> | 8 | 2583 | AACAUUCA  | 2576 | 3 UTR | 0.0119 | 1 |
| <u>PCDHB3</u>  | <u>NM_018937</u> | 7 | 2582 | ACAUUCA   | 2576 | 3 UTR | 0.0466 | 2 |
| <u>PCDHB6</u>  | <u>NM_018939</u> | 8 | 3025 | AACAUUCA  | 3018 | 3 UTR | 0.0098 | 1 |
| <u>PCDHB6</u>  | <u>NM_018939</u> | 7 | 3024 | ACAUUCA   | 3018 | 3 UTR | 0.0386 | 2 |
| <u>PCDHB6</u>  | <u>NM_018939</u> | 8 | 3025 | AACAUUCA  | 3018 | 3 UTR | 0.0098 | 1 |
| <u>PCDHB6</u>  | <u>NM_018939</u> | 7 | 3024 | ACAUUCA   | 3018 | 3 UTR | 0.0386 | 2 |
| <u>PCGF2</u>   | <u>NM_007144</u> | 9 | 1818 | ACAUUCAAC | 1810 | 3 UTR | 0.0051 | 2 |
| <u>PCGF2</u>   | <u>NM_007144</u> | 9 | 1818 | ACAUUCAAC | 1810 | 3 UTR | 0.0051 | 2 |
| <u>PCID2</u>   | <u>NM_018386</u> | 8 | 1520 | ACAUUCA   | 1513 | 3 UTR | 0.0072 | 2 |
| <u>PCID2</u>   | <u>NM_018386</u> | 8 | 1520 | ACAUUCA   | 1513 | 3 UTR | 0.0072 | 2 |
| <u>PCNP</u>    | <u>NM_020357</u> | 8 | 1262 | ACAUUCA   | 1255 | 3 UTR | 0.0255 | 2 |
| <u>PCNP</u>    | <u>NM_020357</u> | 8 | 1262 | ACAUUCA   | 1255 | 3 UTR | 0.0255 | 2 |
| <u>PCSK1</u>   | <u>NM_000439</u> | 9 | 4631 | AACAUUCA  | 4623 | 3 UTR | 0.0098 | 1 |
| <u>PCSK1</u>   | <u>NM_000439</u> | 8 | 3489 | AACAUUCA  | 3482 | 3 UTR | 0.0387 | 1 |
| <u>PCSK1</u>   | <u>NM_000439</u> | 8 | 4630 | ACAUUCA   | 4623 | 3 UTR | 0.0387 | 2 |
| <u>PCSK1</u>   | <u>NM_000439</u> | 9 | 4631 | AACAUUCA  | 4623 | 3 UTR | 0.0098 | 1 |
| <u>PCSK1</u>   | <u>NM_000439</u> | 8 | 3489 | AACAUUCA  | 3482 | 3 UTR | 0.0387 | 1 |
| <u>PCSK1</u>   | <u>NM_000439</u> | 8 | 4630 | ACAUUCA   | 4623 | 3 UTR | 0.0387 | 2 |
| <u>PDAP1</u>   | <u>NM_014891</u> | 9 | 921  | AACAUUCA  | 913  | 3 UTR | 0.0065 | 1 |

|               |                  |   |      |           |      |       |        |   |
|---------------|------------------|---|------|-----------|------|-------|--------|---|
| <u>PDAP1</u>  | <u>NM_014891</u> | 8 | 920  | ACAUUCAA  | 913  | 3 UTR | 0.0258 | 2 |
| <u>PDAP1</u>  | <u>NM_014891</u> | 9 | 921  | AACAUUCA  | 913  | 3 UTR | 0.0065 | 1 |
| <u>PDAP1</u>  | <u>NM_014891</u> | 8 | 920  | ACAUUCAA  | 913  | 3 UTR | 0.0258 | 2 |
| <u>PDCD6</u>  | <u>NM_013232</u> | 7 | 1127 | AACAUUC   | 1121 | 3 UTR | 0.0286 | 1 |
| <u>PDCD6</u>  | <u>NM_013232</u> | 7 | 1127 | AACAUUC   | 1121 | 3 UTR | 0.0286 | 1 |
| <u>PDE11A</u> | <u>NM_016953</u> | 9 | 8676 | AACAUUCA  | 8668 | 3 UTR | 0.0232 | 1 |
| <u>PDE11A</u> | <u>NM_016953</u> | 9 | 8676 | AACAUUCA  | 8668 | 3 UTR | 0.0232 | 1 |
| <u>PDE3B</u>  | <u>NM_000922</u> | 9 | 4141 | AACAUUCA  | 4133 | 3 UTR | 0.0044 | 1 |
| <u>PDE3B</u>  | <u>NM_000922</u> | 8 | 4140 | ACAUUCAA  | 4133 | 3 UTR | 0.0175 | 2 |
| <u>PDE3B</u>  | <u>NM_000922</u> | 9 | 4141 | AACAUUCA  | 4133 | 3 UTR | 0.0044 | 1 |
| <u>PDE3B</u>  | <u>NM_000922</u> | 8 | 4140 | ACAUUCAA  | 4133 | 3 UTR | 0.0175 | 2 |
| <u>PDGFRA</u> | <u>NM_006206</u> | 8 | 6371 | ACAUUCAA  | 6364 | 3 UTR | 0.0444 | 2 |
| <u>PDGFRA</u> | <u>NM_006206</u> | 8 | 6371 | ACAUUCAA  | 6364 | 3 UTR | 0.0444 | 2 |
| <u>PDIA6</u>  | <u>NM_005742</u> | 9 | 1756 | AACAUUCA  | 1748 | 3 UTR | 0.0034 | 1 |
| <u>PDIA6</u>  | <u>NM_005742</u> | 8 | 1755 | ACAUUCAA  | 1748 | 3 UTR | 0.0134 | 2 |
| <u>PDIA6</u>  | <u>NM_005742</u> | 9 | 1756 | AACAUUCA  | 1748 | 3 UTR | 0.0034 | 1 |
| <u>PDIA6</u>  | <u>NM_005742</u> | 8 | 1755 | ACAUUCAA  | 1748 | 3 UTR | 0.0134 | 2 |
| <u>PDXDC1</u> | <u>NM_015027</u> | 9 | 3974 | AACAUUCA  | 3966 | 3 UTR | 0.0055 | 1 |
| <u>PDXDC1</u> | <u>NM_015027</u> | 8 | 3973 | ACAUUCAA  | 3966 | 3 UTR | 0.0217 | 2 |
| <u>PDXDC1</u> | <u>NM_015027</u> | 9 | 3974 | AACAUUCA  | 3966 | 3 UTR | 0.0055 | 1 |
| <u>PDXDC1</u> | <u>NM_015027</u> | 8 | 3973 | ACAUUCAA  | 3966 | 3 UTR | 0.0217 | 2 |
| <u>PDZD11</u> | <u>NM_016484</u> | 9 | 1035 | AACAUUCA  | 1027 | 3 UTR | 0.0027 | 1 |
| <u>PDZD11</u> | <u>NM_016484</u> | 8 | 1034 | ACAUUCAA  | 1027 | 3 UTR | 0.0109 | 2 |
| <u>PDZD11</u> | <u>NM_016484</u> | 9 | 1035 | AACAUUCA  | 1027 | 3 UTR | 0.0027 | 1 |
| <u>PDZD11</u> | <u>NM_016484</u> | 8 | 1034 | ACAUUCAA  | 1027 | 3 UTR | 0.0109 | 2 |
| <u>PEBP1</u>  | <u>NM_002567</u> | 8 | 1437 | AACAUUCA  | 1430 | 3 UTR | 0.0121 | 1 |
| <u>PEBP1</u>  | <u>NM_002567</u> | 7 | 1436 | ACAUUCA   | 1430 | 3 UTR | 0.0475 | 2 |
| <u>PEBP1</u>  | <u>NM_002567</u> | 8 | 1437 | AACAUUCA  | 1430 | 3 UTR | 0.0121 | 1 |
| <u>PEBP1</u>  | <u>NM_002567</u> | 7 | 1436 | ACAUUCA   | 1430 | 3 UTR | 0.0475 | 2 |
| <u>PEF1</u>   | <u>NM_012392</u> | 9 | 1105 | ACAUUCAAC | 1097 | 3 UTR | 0.0029 | 2 |
| <u>PEF1</u>   | <u>NM_012392</u> | 9 | 1105 | ACAUUCAAC | 1097 | 3 UTR | 0.0029 | 2 |
| <u>PEG3</u>   | <u>NM_006210</u> | 9 | 7629 | AACAUUCA  | 7621 | 3 UTR | 0.0047 | 1 |
| <u>PEG3</u>   | <u>NM_006210</u> | 8 | 7628 | ACAUUCAA  | 7621 | 3 UTR | 0.0187 | 2 |
| <u>PEG3</u>   | <u>NM_006210</u> | 9 | 7629 | AACAUUCA  | 7621 | 3 UTR | 0.0047 | 1 |
| <u>PEG3</u>   | <u>NM_006210</u> | 8 | 7628 | ACAUUCAA  | 7621 | 3 UTR | 0.0187 | 2 |
| <u>PER2</u>   | <u>NM_022817</u> | 8 | 5937 | AACAUUCA  | 5930 | 3 UTR | 0.0350 | 1 |
| <u>PER2</u>   | <u>NM_022817</u> | 8 | 5937 | AACAUUCA  | 5930 | 3 UTR | 0.0350 | 1 |
| <u>PER3</u>   | <u>NM_016831</u> | 9 | 3886 | AACAUUCA  | 3878 | 3 UTR | 0.0092 | 1 |

|                |                     |    |      |            |      |       |        |   |
|----------------|---------------------|----|------|------------|------|-------|--------|---|
| <u>PER3</u>    | <u>NM_016831</u>    | 8  | 3885 | ACAUUCAA   | 3878 | 3 UTR | 0.0363 | 2 |
| <u>PER3</u>    | <u>NM_016831</u>    | 9  | 3886 | AACAUUCA   | 3878 | 3 UTR | 0.0092 | 1 |
| <u>PER3</u>    | <u>NM_016831</u>    | 8  | 3885 | ACAUUCAA   | 3878 | 3 UTR | 0.0363 | 2 |
| <u>PERP</u>    | <u>NM_022121</u>    | 8  | 2627 | AACAUUCA   | 2620 | 3 UTR | 0.0189 | 1 |
| <u>PERP</u>    | <u>NM_022121</u>    | 8  | 2627 | AACAUUCA   | 2620 | 3 UTR | 0.0189 | 1 |
| <u>PF4V1</u>   | <u>NM_002620</u>    | 9  | 701  | AACAUUCA   | 693  | 3 UTR | 0.0014 | 1 |
| <u>PF4V1</u>   | <u>NM_002620</u>    | 8  | 700  | ACAUUCAA   | 693  | 3 UTR | 0.0055 | 2 |
| <u>PF4V1</u>   | <u>NM_002620</u>    | 9  | 701  | AACAUUCA   | 693  | 3 UTR | 0.0014 | 1 |
| <u>PF4V1</u>   | <u>NM_002620</u>    | 8  | 700  | ACAUUCAA   | 693  | 3 UTR | 0.0055 | 2 |
| <u>PGBD1</u>   | <u>NM_032507</u>    | 7  | 2996 | AACAUUC    | 2990 | 3 UTR | 0.0171 | 1 |
| <u>PGBD1</u>   | <u>NM_032507</u>    | 7  | 2996 | AACAUUC    | 2990 | 3 UTR | 0.0171 | 1 |
| <u>PHF20L1</u> | <u>NM_016018</u>    | 8  | 3925 | AACAUUCA   | 3918 | 3 UTR | 0.0431 | 1 |
| <u>PHF20L1</u> | <u>NM_016018</u>    | 8  | 3925 | AACAUUCA   | 3918 | 3 UTR | 0.0431 | 1 |
| <u>PHF3</u>    | <u>NM_015153</u>    | 7  | 6502 | ACAUUCA    | 6496 | 3 UTR | 0.0477 | 2 |
| <u>PHF3</u>    | <u>NM_015153</u>    | 7  | 6502 | ACAUUCA    | 6496 | 3 UTR | 0.0477 | 2 |
| <u>PHIP</u>    | <u>NM_017934</u>    | 8  | 9204 | AACAUUCA   | 9197 | 3 UTR | 0.0022 | 1 |
| <u>PHIP</u>    | <u>NM_017934</u>    | 7  | 6256 | AACAUUC    | 6250 | 3 UTR | 0.0089 | 1 |
| <u>PHIP</u>    | <u>NM_017934</u>    | 7  | 5799 | AACAUUC    | 5793 | 3 UTR | 0.0089 | 1 |
| <u>PHIP</u>    | <u>NM_017934</u>    | 7  | 9203 | ACAUUCA    | 9197 | 3 UTR | 0.0089 | 2 |
| <u>PHIP</u>    | <u>NM_017934</u>    | 8  | 9204 | AACAUUCA   | 9197 | 3 UTR | 0.0022 | 1 |
| <u>PHIP</u>    | <u>NM_017934</u>    | 7  | 6256 | AACAUUC    | 6250 | 3 UTR | 0.0089 | 1 |
| <u>PHIP</u>    | <u>NM_017934</u>    | 7  | 5799 | AACAUUC    | 5793 | 3 UTR | 0.0089 | 1 |
| <u>PHIP</u>    | <u>NM_017934</u>    | 7  | 9203 | ACAUUCA    | 9197 | 3 UTR | 0.0089 | 2 |
| <u>PHLPPL</u>  | <u>NM_015020</u>    | 9  | 7016 | AACAUUCA   | 7008 | 3 UTR | 0.0149 | 1 |
| <u>PHLPPL</u>  | <u>NM_015020</u>    | 9  | 5434 | AACAUUCA   | 5426 | 3 UTR | 0.0149 | 1 |
| <u>PHLPPL</u>  | <u>NM_015020</u>    | 9  | 7016 | AACAUUCA   | 7008 | 3 UTR | 0.0149 | 1 |
| <u>PHLPPL</u>  | <u>NM_015020</u>    | 9  | 5434 | AACAUUCA   | 5426 | 3 UTR | 0.0149 | 1 |
| <u>PHOX2B</u>  | <u>NM_003924</u>    | 10 | 2597 | AACAUUCAAC | 2588 | 3 UTR | 0.0016 | 1 |
| <u>PHOX2B</u>  | <u>NM_003924</u>    | 9  | 2596 | ACAUUCAAC  | 2588 | 3 UTR | 0.0066 | 2 |
| <u>PHOX2B</u>  | <u>NM_003924</u>    | 10 | 2597 | AACAUUCAAC | 2588 | 3 UTR | 0.0016 | 1 |
| <u>PHOX2B</u>  | <u>NM_003924</u>    | 9  | 2596 | ACAUUCAAC  | 2588 | 3 UTR | 0.0066 | 2 |
| <u>PI4K2A</u>  | <u>NM_018425</u>    | 8  | 3580 | ACAUUCAA   | 3573 | 3 UTR | 0.0402 | 2 |
| <u>PI4K2A</u>  | <u>NM_018425</u>    | 8  | 3580 | ACAUUCAA   | 3573 | 3 UTR | 0.0402 | 2 |
| <u>PI4K2B</u>  | <u>NM_018323</u>    | 8  | 1715 | ACAUUCAA   | 1708 | 3 UTR | 0.0286 | 2 |
| <u>PI4K2B</u>  | <u>NM_018323</u>    | 8  | 1715 | ACAUUCAA   | 1708 | 3 UTR | 0.0286 | 2 |
| <u>PIAS3</u>   | <u>NM_006099</u>    | 8  | 2901 | AACAUUCA   | 2894 | 3 UTR | 0.0140 | 1 |
| <u>PIAS3</u>   | <u>NM_006099</u>    | 8  | 2901 | AACAUUCA   | 2894 | 3 UTR | 0.0140 | 1 |
| <u>PIH1D2</u>  | <u>NM_001082619</u> | 9  | 1095 | AACAUUCA   | 1087 | 3 UTR | 0.0007 | 1 |



|                |                     |   |      |          |      |       |        |   |
|----------------|---------------------|---|------|----------|------|-------|--------|---|
| <u>PIH1D2</u>  | <u>NM_001082619</u> | 8 | 1094 | ACAUCAA  | 1087 | 3 UTR | 0.0026 | 2 |
| <u>PIH1D2</u>  | <u>NM_001082619</u> | 9 | 1095 | AACAUCAA | 1087 | 3 UTR | 0.0007 | 1 |
| <u>PIH1D2</u>  | <u>NM_001082619</u> | 8 | 1094 | ACAUCAA  | 1087 | 3 UTR | 0.0026 | 2 |
| <u>PIK3C2A</u> | <u>NM_002645</u>    | 8 | 5140 | AACAUUCA | 5133 | 3 UTR | 0.0473 | 1 |
| <u>PIK3C2A</u> | <u>NM_002645</u>    | 8 | 8242 | ACAUCAA  | 8235 | 3 UTR | 0.0473 | 2 |
| <u>PIK3C2A</u> | <u>NM_002645</u>    | 8 | 5140 | AACAUUCA | 5133 | 3 UTR | 0.0473 | 1 |
| <u>PIK3C2A</u> | <u>NM_002645</u>    | 8 | 8242 | ACAUCAA  | 8235 | 3 UTR | 0.0473 | 2 |
| <u>PIK3R3</u>  | <u>NM_003629</u>    | 9 | 2859 | ACAUCAAC | 2851 | 3 UTR | 0.0135 | 2 |
| <u>PIK3R3</u>  | <u>NM_003629</u>    | 9 | 2859 | ACAUCAAC | 2851 | 3 UTR | 0.0135 | 2 |
| <u>PIN4</u>    | <u>NM_006223</u>    | 7 | 696  | ACAUCA   | 690  | 3 UTR | 0.0349 | 2 |
| <u>PIN4</u>    | <u>NM_006223</u>    | 7 | 696  | ACAUCA   | 690  | 3 UTR | 0.0349 | 2 |
| <u>PJA2</u>    | <u>NM_014819</u>    | 8 | 2543 | AACAUUCA | 2536 | 3 UTR | 0.0379 | 1 |
| <u>PJA2</u>    | <u>NM_014819</u>    | 8 | 2543 | AACAUUCA | 2536 | 3 UTR | 0.0379 | 1 |
| <u>PKD2</u>    | <u>NM_000297</u>    | 8 | 3548 | AACAUUCA | 3541 | 3 UTR | 0.0315 | 1 |
| <u>PKD2</u>    | <u>NM_000297</u>    | 8 | 3548 | AACAUUCA | 3541 | 3 UTR | 0.0315 | 1 |
| <u>PKP2</u>    | <u>NM_004572</u>    | 8 | 4165 | ACAUCAA  | 4158 | 3 UTR | 0.0253 | 2 |
| <u>PKP2</u>    | <u>NM_004572</u>    | 8 | 4165 | ACAUCAA  | 4158 | 3 UTR | 0.0253 | 2 |
| <u>PLA2G4A</u> | <u>NM_024420</u>    | 8 | 2828 | AACAUUCA | 2821 | 3 UTR | 0.0074 | 1 |
| <u>PLA2G4A</u> | <u>NM_024420</u>    | 7 | 2827 | ACAUCA   | 2821 | 3 UTR | 0.0292 | 2 |
| <u>PLA2G4A</u> | <u>NM_024420</u>    | 8 | 2828 | AACAUUCA | 2821 | 3 UTR | 0.0074 | 1 |
| <u>PLA2G4A</u> | <u>NM_024420</u>    | 7 | 2827 | ACAUCA   | 2821 | 3 UTR | 0.0292 | 2 |
| <u>PLA2G4C</u> | <u>NM_003706</u>    | 7 | 2338 | ACAUCA   | 2332 | 3 UTR | 0.0335 | 2 |
| <u>PLA2G4C</u> | <u>NM_003706</u>    | 7 | 2338 | ACAUCA   | 2332 | 3 UTR | 0.0335 | 2 |
| <u>PLAC1L</u>  | <u>NM_173801</u>    | 8 | 1536 | ACAUCAA  | 1529 | 3 UTR | 0.0149 | 2 |
| <u>PLAC1L</u>  | <u>NM_173801</u>    | 8 | 1536 | ACAUCAA  | 1529 | 3 UTR | 0.0149 | 2 |
| <u>PLAC8</u>   | <u>NM_001130716</u> | 8 | 671  | AACAUUCA | 664  | 3 UTR | 0.0141 | 1 |
| <u>PLAC8</u>   | <u>NM_001130716</u> | 8 | 671  | AACAUUCA | 664  | 3 UTR | 0.0141 | 1 |
| <u>PLD1</u>    | <u>NM_002662</u>    | 8 | 4920 | AACAUUCA | 4913 | 3 UTR | 0.0340 | 1 |
| <u>PLD1</u>    | <u>NM_002662</u>    | 8 | 4920 | AACAUUCA | 4913 | 3 UTR | 0.0340 | 1 |
| <u>PLDN</u>    | <u>NM_012388</u>    | 9 | 3797 | ACAUCAAC | 3789 | 3 UTR | 0.0122 | 2 |
| <u>PLDN</u>    | <u>NM_012388</u>    | 9 | 3797 | ACAUCAAC | 3789 | 3 UTR | 0.0122 | 2 |
| <u>PLEKHA1</u> | <u>NM_001001974</u> | 9 | 2344 | ACAUCAAC | 2336 | 3 UTR | 0.0092 | 2 |
| <u>PLEKHA1</u> | <u>NM_001001974</u> | 9 | 2344 | ACAUCAAC | 2336 | 3 UTR | 0.0092 | 2 |
| <u>PLEKHJ1</u> | <u>NM_018049</u>    | 7 | 1060 | ACAUCA   | 1054 | 3 UTR | 0.0409 | 2 |
| <u>PLEKHJ1</u> | <u>NM_018049</u>    | 7 | 1060 | ACAUCA   | 1054 | 3 UTR | 0.0409 | 2 |
| <u>PLRG1</u>   | <u>NM_002669</u>    | 7 | 1615 | ACAUCA   | 1609 | 3 UTR | 0.0115 | 2 |
| <u>PLRG1</u>   | <u>NM_002669</u>    | 7 | 1615 | ACAUCA   | 1609 | 3 UTR | 0.0115 | 2 |
| <u>PLS1</u>    | <u>NM_002670</u>    | 8 | 2953 | ACAUCAA  | 2946 | 3 UTR | 0.0249 | 2 |

|                 |                     |    |      |            |      |       |        |   |
|-----------------|---------------------|----|------|------------|------|-------|--------|---|
| <u>PLS1</u>     | <u>NM_002670</u>    | 8  | 2953 | ACAUCAA    | 2946 | 3 UTR | 0.0249 | 2 |
| <u>PMAIP1</u>   | <u>NM_021127</u>    | 8  | 1251 | AACAUUCA   | 1244 | 3 UTR | 0.0237 | 1 |
| <u>PMAIP1</u>   | <u>NM_021127</u>    | 8  | 1251 | AACAUUCA   | 1244 | 3 UTR | 0.0237 | 1 |
| <u>PNLIPRP3</u> | <u>NM_001011709</u> | 7  | 1670 | AACAUUC    | 1664 | 3 UTR | 0.0479 | 1 |
| <u>PNLIPRP3</u> | <u>NM_001011709</u> | 7  | 1670 | AACAUUC    | 1664 | 3 UTR | 0.0479 | 1 |
| <u>PNMA1</u>    | <u>NM_006029</u>    | 7  | 2188 | ACAUUCA    | 2182 | 3 UTR | 0.0487 | 2 |
| <u>PNMA1</u>    | <u>NM_006029</u>    | 7  | 2188 | ACAUUCA    | 2182 | 3 UTR | 0.0487 | 2 |
| <u>PNMA2</u>    | <u>NM_007257</u>    | 8  | 3267 | ACAUCAA    | 3260 | 3 UTR | 0.0445 | 2 |
| <u>PNMA2</u>    | <u>NM_007257</u>    | 8  | 3267 | ACAUCAA    | 3260 | 3 UTR | 0.0445 | 2 |
| <u>PNRC1</u>    | <u>NM_006813</u>    | 8  | 1855 | ACAUCAA    | 1848 | 3 UTR | 0.0146 | 2 |
| <u>PNRC1</u>    | <u>NM_006813</u>    | 8  | 1855 | ACAUCAA    | 1848 | 3 UTR | 0.0146 | 2 |
| <u>POLR2K</u>   | <u>NM_005034</u>    | 7  | 581  | ACAUUCA    | 575  | 3 UTR | 0.0410 | 2 |
| <u>POLR2K</u>   | <u>NM_005034</u>    | 7  | 581  | ACAUUCA    | 575  | 3 UTR | 0.0410 | 2 |
| <u>POLR3F</u>   | <u>NM_006466</u>    | 8  | 1860 | AACAUUCA   | 1853 | 3 UTR | 0.0168 | 1 |
| <u>POLR3F</u>   | <u>NM_006466</u>    | 8  | 1860 | AACAUUCA   | 1853 | 3 UTR | 0.0168 | 1 |
| <u>POLR3G</u>   | <u>NM_006467</u>    | 8  | 2995 | AACAUUCA   | 2988 | 3 UTR | 0.0361 | 1 |
| <u>POLR3G</u>   | <u>NM_006467</u>    | 8  | 2995 | AACAUUCA   | 2988 | 3 UTR | 0.0361 | 1 |
| <u>POLR3K</u>   | <u>NM_016310</u>    | 7  | 558  | ACAUUCA    | 552  | 3 UTR | 0.0259 | 2 |
| <u>POLR3K</u>   | <u>NM_016310</u>    | 7  | 558  | ACAUUCA    | 552  | 3 UTR | 0.0259 | 2 |
| <u>POMC</u>     | <u>NM_001035256</u> | 8  | 1250 | ACAUCAA    | 1243 | 3 UTR | 0.0035 | 2 |
| <u>POMC</u>     | <u>NM_001035256</u> | 8  | 1250 | ACAUCAA    | 1243 | 3 UTR | 0.0035 | 2 |
| <u>PPCS</u>     | <u>NM_024664</u>    | 7  | 1277 | ACAUUCA    | 1271 | 3 UTR | 0.0294 | 2 |
| <u>PPCS</u>     | <u>NM_024664</u>    | 7  | 1277 | ACAUUCA    | 1271 | 3 UTR | 0.0294 | 2 |
| <u>PPP1R2</u>   | <u>NM_006241</u>    | 8  | 3192 | AACAUUCA   | 3185 | 3 UTR | 0.0371 | 1 |
| <u>PPP1R2</u>   | <u>NM_006241</u>    | 8  | 3192 | AACAUUCA   | 3185 | 3 UTR | 0.0371 | 1 |
| <u>PPP1R3C</u>  | <u>NM_005398</u>    | 9  | 2279 | AACAUUCA   | 2271 | 3 UTR | 0.0059 | 1 |
| <u>PPP1R3C</u>  | <u>NM_005398</u>    | 8  | 2278 | ACAUCAA    | 2271 | 3 UTR | 0.0235 | 2 |
| <u>PPP1R3C</u>  | <u>NM_005398</u>    | 9  | 2279 | AACAUUCA   | 2271 | 3 UTR | 0.0059 | 1 |
| <u>PPP1R3C</u>  | <u>NM_005398</u>    | 8  | 2278 | ACAUCAA    | 2271 | 3 UTR | 0.0235 | 2 |
| <u>PPP1R3D</u>  | <u>NM_006242</u>    | 8  | 3197 | AACAUUCA   | 3190 | 3 UTR | 0.0332 | 1 |
| <u>PPP1R3D</u>  | <u>NM_006242</u>    | 8  | 3197 | AACAUUCA   | 3190 | 3 UTR | 0.0332 | 1 |
| <u>PPP1R9A</u>  | <u>NM_017650</u>    | 9  | 5877 | AACAUUCA   | 5869 | 3 UTR | 0.0231 | 1 |
| <u>PPP1R9A</u>  | <u>NM_017650</u>    | 9  | 5877 | AACAUUCA   | 5869 | 3 UTR | 0.0231 | 1 |
| <u>PPP2R3A</u>  | <u>NM_002718</u>    | 8  | 4284 | ACAUCAA    | 4277 | 3 UTR | 0.0410 | 2 |
| <u>PPP2R3A</u>  | <u>NM_002718</u>    | 8  | 4284 | ACAUCAA    | 4277 | 3 UTR | 0.0410 | 2 |
| <u>PPP3R1</u>   | <u>NM_000945</u>    | 10 | 2922 | AACAUUCAAC | 2913 | 3 UTR | 0.0021 | 1 |
| <u>PPP3R1</u>   | <u>NM_000945</u>    | 9  | 2921 | ACAUUCAAC  | 2913 | 3 UTR | 0.0084 | 2 |
| <u>PPP3R1</u>   | <u>NM_000945</u>    | 10 | 2922 | AACAUUCAAC | 2913 | 3 UTR | 0.0021 | 1 |

|               |                     |   |      |           |      |       |        |   |
|---------------|---------------------|---|------|-----------|------|-------|--------|---|
| <u>PPP3R1</u> | <u>NM_000945</u>    | 9 | 2921 | ACAUUCAAC | 2913 | 3 UTR | 0.0084 | 2 |
| <u>PQLC1</u>  | <u>NM_025078</u>    | 8 | 2356 | ACAUUCAAA | 2349 | 3 UTR | 0.0232 | 2 |
| <u>PQLC1</u>  | <u>NM_025078</u>    | 8 | 2356 | ACAUUCAAA | 2349 | 3 UTR | 0.0232 | 2 |
| <u>PRCP</u>   | <u>NM_199418</u>    | 7 | 1838 | ACAUUCA   | 1832 | 3 UTR | 0.0334 | 2 |
| <u>PRCP</u>   | <u>NM_199418</u>    | 7 | 1838 | ACAUUCA   | 1832 | 3 UTR | 0.0334 | 2 |
| <u>PRDM1</u>  | <u>NM_001198</u>    | 8 | 4981 | AACAUUCA  | 4974 | 3 UTR | 0.0367 | 1 |
| <u>PRDM1</u>  | <u>NM_001198</u>    | 8 | 4981 | AACAUUCA  | 4974 | 3 UTR | 0.0367 | 1 |
| <u>PRDX3</u>  | <u>NM_006793</u>    | 8 | 1295 | AACAUUCA  | 1288 | 3 UTR | 0.0118 | 1 |
| <u>PRDX3</u>  | <u>NM_006793</u>    | 8 | 1211 | ACAUUCAAA | 1204 | 3 UTR | 0.0118 | 2 |
| <u>PRDX3</u>  | <u>NM_006793</u>    | 8 | 1295 | AACAUUCA  | 1288 | 3 UTR | 0.0118 | 1 |
| <u>PRDX3</u>  | <u>NM_006793</u>    | 8 | 1211 | ACAUUCAAA | 1204 | 3 UTR | 0.0118 | 2 |
| <u>PRDX5</u>  | <u>NM_012094</u>    | 7 | 845  | AACAUUC   | 839  | 3 UTR | 0.0118 | 1 |
| <u>PRDX5</u>  | <u>NM_012094</u>    | 7 | 845  | AACAUUC   | 839  | 3 UTR | 0.0118 | 1 |
| <u>PRKAG2</u> | <u>NM_016203</u>    | 8 | 2752 | ACAUUCAAA | 2745 | 3 UTR | 0.0167 | 2 |
| <u>PRKAG2</u> | <u>NM_016203</u>    | 8 | 2752 | ACAUUCAAA | 2745 | 3 UTR | 0.0167 | 2 |
| <u>PRKCA</u>  | <u>NM_002737</u>    | 9 | 4967 | ACAUUCAAC | 4959 | 3 UTR | 0.0253 | 2 |
| <u>PRKCA</u>  | <u>NM_002737</u>    | 9 | 4967 | ACAUUCAAC | 4959 | 3 UTR | 0.0253 | 2 |
| <u>PRKG1</u>  | <u>NM_001098512</u> | 8 | 2796 | AACAUUCA  | 2789 | 3 UTR | 0.0243 | 1 |
| <u>PRKG1</u>  | <u>NM_001098512</u> | 8 | 2796 | AACAUUCA  | 2789 | 3 UTR | 0.0243 | 1 |
| <u>PRM1</u>   | <u>NM_002761</u>    | 7 | 297  | AACAUUC   | 291  | 3 UTR | 0.0105 | 1 |
| <u>PRM1</u>   | <u>NM_002761</u>    | 7 | 297  | AACAUUC   | 291  | 3 UTR | 0.0105 | 1 |
| <u>PRMT2</u>  | <u>NM_206962</u>    | 7 | 2238 | ACAUUCA   | 2232 | 3 UTR | 0.0379 | 2 |
| <u>PRMT2</u>  | <u>NM_206962</u>    | 7 | 2238 | ACAUUCA   | 2232 | 3 UTR | 0.0379 | 2 |
| <u>PRMT8</u>  | <u>NM_019854</u>    | 7 | 2009 | ACAUUCA   | 2003 | 3 UTR | 0.0479 | 2 |
| <u>PRMT8</u>  | <u>NM_019854</u>    | 7 | 2009 | ACAUUCA   | 2003 | 3 UTR | 0.0479 | 2 |
| <u>PROCR</u>  | <u>NM_006404</u>    | 8 | 1152 | AACAUUCA  | 1145 | 3 UTR | 0.0088 | 1 |
| <u>PROCR</u>  | <u>NM_006404</u>    | 7 | 1151 | ACAUUCA   | 1145 | 3 UTR | 0.0349 | 2 |
| <u>PROCR</u>  | <u>NM_006404</u>    | 8 | 1152 | AACAUUCA  | 1145 | 3 UTR | 0.0088 | 1 |
| <u>PROCR</u>  | <u>NM_006404</u>    | 7 | 1151 | ACAUUCA   | 1145 | 3 UTR | 0.0349 | 2 |
| <u>PROM2</u>  | <u>NM_144707</u>    | 8 | 3692 | ACAUUCAAA | 3685 | 3 UTR | 0.0179 | 2 |
| <u>PROM2</u>  | <u>NM_144707</u>    | 8 | 3692 | ACAUUCAAA | 3685 | 3 UTR | 0.0179 | 2 |
| <u>PROX1</u>  | <u>NM_002763</u>    | 7 | 2766 | AACAUUC   | 2760 | 3 UTR | 0.0361 | 1 |
| <u>PROX1</u>  | <u>NM_002763</u>    | 8 | 2512 | ACAUUCAAA | 2505 | 3 UTR | 0.0091 | 2 |
| <u>PROX1</u>  | <u>NM_002763</u>    | 7 | 2766 | AACAUUC   | 2760 | 3 UTR | 0.0361 | 1 |
| <u>PROX1</u>  | <u>NM_002763</u>    | 8 | 2512 | ACAUUCAAA | 2505 | 3 UTR | 0.0091 | 2 |
| <u>PRPF18</u> | <u>NM_003675</u>    | 8 | 1688 | ACAUUCAAA | 1681 | 3 UTR | 0.0081 | 2 |
| <u>PRPF18</u> | <u>NM_003675</u>    | 8 | 1688 | ACAUUCAAA | 1681 | 3 UTR | 0.0081 | 2 |
| <u>PRPF39</u> | <u>NM_017922</u>    | 7 | 2718 | AACAUUC   | 2712 | 3 UTR | 0.0426 | 1 |

|               |                  |    |       |            |       |       |        |   |
|---------------|------------------|----|-------|------------|-------|-------|--------|---|
| <u>PRPF39</u> | <u>NM_017922</u> | 7  | 2718  | AACAUUC    | 2712  | 3 UTR | 0.0426 | 1 |
| <u>PRPF4B</u> | <u>NM_003913</u> | 9  | 6996  | AACAUUCA   | 6988  | 3 UTR | 0.0165 | 1 |
| <u>PRPF4B</u> | <u>NM_003913</u> | 9  | 6996  | AACAUUCA   | 6988  | 3 UTR | 0.0165 | 1 |
| <u>PRR6</u>   | <u>NM_181716</u> | 7  | 970   | ACAUUCA    | 964   | 3 UTR | 0.0181 | 2 |
| <u>PRR6</u>   | <u>NM_181716</u> | 7  | 970   | ACAUUCA    | 964   | 3 UTR | 0.0181 | 2 |
| <u>PRRC1</u>  | <u>NM_130809</u> | 10 | 1898  | AACAUUCAAC | 1889  | 3 UTR | 0.0030 | 1 |
| <u>PRRC1</u>  | <u>NM_130809</u> | 9  | 1897  | ACAUUCAAC  | 1889  | 3 UTR | 0.0121 | 2 |
| <u>PRRC1</u>  | <u>NM_130809</u> | 10 | 1898  | AACAUUCAAC | 1889  | 3 UTR | 0.0030 | 1 |
| <u>PRRC1</u>  | <u>NM_130809</u> | 9  | 1897  | ACAUUCAAC  | 1889  | 3 UTR | 0.0121 | 2 |
| <u>PRSS16</u> | <u>NM_005865</u> | 9  | 1804  | AACAUUCA   | 1796  | 3 UTR | 0.0044 | 1 |
| <u>PRSS16</u> | <u>NM_005865</u> | 8  | 1803  | ACAUUCA    | 1796  | 3 UTR | 0.0176 | 2 |
| <u>PRSS16</u> | <u>NM_005865</u> | 9  | 1804  | AACAUUCA   | 1796  | 3 UTR | 0.0044 | 1 |
| <u>PRSS16</u> | <u>NM_005865</u> | 8  | 1803  | ACAUUCA    | 1796  | 3 UTR | 0.0176 | 2 |
| <u>PRTG</u>   | <u>NM_173814</u> | 9  | 3810  | AACAUUCA   | 3802  | 3 UTR | 0.0023 | 1 |
| <u>PRTG</u>   | <u>NM_173814</u> | 8  | 11729 | ACAUUCA    | 11722 | 3 UTR | 0.0093 | 2 |
| <u>PRTG</u>   | <u>NM_173814</u> | 8  | 3809  | ACAUUCA    | 3802  | 3 UTR | 0.0093 | 2 |
| <u>PRTG</u>   | <u>NM_173814</u> | 8  | 3770  | ACAUUCA    | 3763  | 3 UTR | 0.0093 | 2 |
| <u>PRTG</u>   | <u>NM_173814</u> | 9  | 3810  | AACAUUCA   | 3802  | 3 UTR | 0.0023 | 1 |
| <u>PRTG</u>   | <u>NM_173814</u> | 8  | 11729 | ACAUUCA    | 11722 | 3 UTR | 0.0093 | 2 |
| <u>PRTG</u>   | <u>NM_173814</u> | 8  | 3809  | ACAUUCA    | 3802  | 3 UTR | 0.0093 | 2 |
| <u>PRTG</u>   | <u>NM_173814</u> | 8  | 3770  | ACAUUCA    | 3763  | 3 UTR | 0.0093 | 2 |
| <u>PRUNE2</u> | <u>NM_015225</u> | 8  | 10062 | AACAUUCA   | 10055 | 3 UTR | 0.0478 | 1 |
| <u>PRUNE2</u> | <u>NM_015225</u> | 8  | 10062 | AACAUUCA   | 10055 | 3 UTR | 0.0478 | 1 |
| <u>PSG11</u>  | <u>NM_002785</u> | 9  | 1379  | AACAUUCA   | 1371  | 3 UTR | 0.0016 | 1 |
| <u>PSG11</u>  | <u>NM_002785</u> | 8  | 1378  | ACAUUCA    | 1371  | 3 UTR | 0.0065 | 2 |
| <u>PSG11</u>  | <u>NM_002785</u> | 9  | 1379  | AACAUUCA   | 1371  | 3 UTR | 0.0016 | 1 |
| <u>PSG11</u>  | <u>NM_002785</u> | 8  | 1378  | ACAUUCA    | 1371  | 3 UTR | 0.0065 | 2 |
| <u>PSG2</u>   | <u>NM_031246</u> | 7  | 1366  | AACAUUC    | 1360  | 3 UTR | 0.0260 | 1 |
| <u>PSG2</u>   | <u>NM_031246</u> | 7  | 1366  | AACAUUC    | 1360  | 3 UTR | 0.0260 | 1 |
| <u>PSG3</u>   | <u>NM_021016</u> | 9  | 1744  | AACAUUCA   | 1736  | 3 UTR | 0.0019 | 1 |
| <u>PSG3</u>   | <u>NM_021016</u> | 8  | 1743  | ACAUUCA    | 1736  | 3 UTR | 0.0076 | 2 |
| <u>PSG3</u>   | <u>NM_021016</u> | 9  | 1744  | AACAUUCA   | 1736  | 3 UTR | 0.0019 | 1 |
| <u>PSG3</u>   | <u>NM_021016</u> | 8  | 1743  | ACAUUCA    | 1736  | 3 UTR | 0.0076 | 2 |
| <u>PSG5</u>   | <u>NM_002781</u> | 9  | 1472  | AACAUUCA   | 1464  | 3 UTR | 0.0020 | 1 |
| <u>PSG5</u>   | <u>NM_002781</u> | 8  | 1471  | ACAUUCA    | 1464  | 3 UTR | 0.0081 | 2 |
| <u>PSG5</u>   | <u>NM_002781</u> | 9  | 1472  | AACAUUCA   | 1464  | 3 UTR | 0.0020 | 1 |
| <u>PSG5</u>   | <u>NM_002781</u> | 8  | 1471  | ACAUUCA    | 1464  | 3 UTR | 0.0081 | 2 |
| <u>PSG9</u>   | <u>NM_002784</u> | 9  | 1535  | AACAUUCA   | 1527  | 3 UTR | 0.0012 | 1 |

|                 |                     |    |      |           |      |       |        |   |
|-----------------|---------------------|----|------|-----------|------|-------|--------|---|
| <u>PSG9</u>     | <u>NM_002784</u>    | 8  | 1534 | ACAUCAA   | 1527 | 3 UTR | 0.0050 | 2 |
| <u>PSG9</u>     | <u>NM_002784</u>    | 9  | 1535 | AACAUCAA  | 1527 | 3 UTR | 0.0012 | 1 |
| <u>PSG9</u>     | <u>NM_002784</u>    | 8  | 1534 | ACAUCAA   | 1527 | 3 UTR | 0.0050 | 2 |
| <u>PSMD13</u>   | <u>NM_175932</u>    | 7  | 1734 | AACAUUC   | 1728 | 3 UTR | 0.0232 | 1 |
| <u>PSMD13</u>   | <u>NM_175932</u>    | 7  | 1734 | AACAUUC   | 1728 | 3 UTR | 0.0232 | 1 |
| <u>PSMD14</u>   | <u>NM_005805</u>    | 7  | 1292 | AACAUUC   | 1286 | 3 UTR | 0.0019 | 1 |
| <u>PSMD14</u>   | <u>NM_005805</u>    | 7  | 1292 | AACAUUC   | 1286 | 3 UTR | 0.0019 | 1 |
| <u>PSORS1C1</u> | <u>NM_014068</u>    | 7  | 760  | AACAUUC   | 754  | 3 UTR | 0.0078 | 1 |
| <u>PSORS1C1</u> | <u>NM_014068</u>    | 7  | 760  | AACAUUC   | 754  | 3 UTR | 0.0078 | 1 |
| <u>PSPC1</u>    | <u>NM_001042414</u> | 9  | 1967 | AACAUCAA  | 1959 | 3 UTR | 0.0012 | 1 |
| <u>PSPC1</u>    | <u>NM_001042414</u> | 8  | 1966 | ACAUCAA   | 1959 | 3 UTR | 0.0049 | 2 |
| <u>PSPC1</u>    | <u>NM_001042414</u> | 9  | 1967 | AACAUCAA  | 1959 | 3 UTR | 0.0012 | 1 |
| <u>PSPC1</u>    | <u>NM_001042414</u> | 8  | 1966 | ACAUCAA   | 1959 | 3 UTR | 0.0049 | 2 |
| <u>PSRC1</u>    | <u>NM_001032290</u> | 7  | 1793 | ACAUCA    | 1787 | 3 UTR | 0.0368 | 2 |
| <u>PSRC1</u>    | <u>NM_001032290</u> | 7  | 1793 | ACAUCA    | 1787 | 3 UTR | 0.0368 | 2 |
| <u>PTEN</u>     | <u>NM_000314</u>    | 9  | 4560 | AACAUCAA  | 4552 | 3 UTR | 0.0126 | 1 |
| <u>PTEN</u>     | <u>NM_000314</u>    | 8  | 4559 | ACAUCAA   | 4552 | 3 UTR | 0.0495 | 2 |
| <u>PTEN</u>     | <u>NM_000314</u>    | 9  | 4560 | AACAUCAA  | 4552 | 3 UTR | 0.0126 | 1 |
| <u>PTEN</u>     | <u>NM_000314</u>    | 8  | 4559 | ACAUCAA   | 4552 | 3 UTR | 0.0495 | 2 |
| <u>PTGER3</u>   | <u>NM_198715</u>    | 9  | 7596 | AACAUCAA  | 7588 | 3 UTR | 0.0240 | 1 |
| <u>PTGER3</u>   | <u>NM_198715</u>    | 9  | 7596 | AACAUCAA  | 7588 | 3 UTR | 0.0240 | 1 |
| <u>PTGES2</u>   | <u>NM_025072</u>    | 7  | 1616 | ACAUCA    | 1610 | 3 UTR | 0.0305 | 2 |
| <u>PTGES2</u>   | <u>NM_025072</u>    | 7  | 1616 | ACAUCA    | 1610 | 3 UTR | 0.0305 | 2 |
| <u>PTGS2</u>    | <u>NM_000963</u>    | 10 | 3931 | AACAUCAAC | 3922 | 3 UTR | 0.0024 | 1 |
| <u>PTGS2</u>    | <u>NM_000963</u>    | 9  | 3930 | ACAUCAAC  | 3922 | 3 UTR | 0.0096 | 2 |
| <u>PTGS2</u>    | <u>NM_000963</u>    | 10 | 3931 | AACAUCAAC | 3922 | 3 UTR | 0.0024 | 1 |
| <u>PTGS2</u>    | <u>NM_000963</u>    | 9  | 3930 | ACAUCAAC  | 3922 | 3 UTR | 0.0096 | 2 |
| <u>PTPDC1</u>   | <u>NM_177995</u>    | 9  | 2721 | AACAUCAA  | 2713 | 3 UTR | 0.0073 | 1 |
| <u>PTPDC1</u>   | <u>NM_177995</u>    | 8  | 2720 | ACAUCAA   | 2713 | 3 UTR | 0.0287 | 2 |
| <u>PTPDC1</u>   | <u>NM_177995</u>    | 9  | 2721 | AACAUCAA  | 2713 | 3 UTR | 0.0073 | 1 |
| <u>PTPDC1</u>   | <u>NM_177995</u>    | 8  | 2720 | ACAUCAA   | 2713 | 3 UTR | 0.0287 | 2 |
| <u>PTPN22</u>   | <u>NM_015967</u>    | 8  | 3145 | ACAUCAA   | 3138 | 3 UTR | 0.0167 | 2 |
| <u>PTPN22</u>   | <u>NM_015967</u>    | 8  | 3145 | ACAUCAA   | 3138 | 3 UTR | 0.0167 | 2 |
| <u>PTPRB</u>    | <u>NM_001109754</u> | 9  | 9645 | ACAUCAAC  | 9637 | 3 UTR | 0.0175 | 2 |
| <u>PTPRB</u>    | <u>NM_001109754</u> | 9  | 9645 | ACAUCAAC  | 9637 | 3 UTR | 0.0175 | 2 |
| <u>PTPRE</u>    | <u>NM_006504</u>    | 8  | 5255 | AACAUUCA  | 5248 | 3 UTR | 0.0449 | 1 |
| <u>PTPRE</u>    | <u>NM_006504</u>    | 8  | 5255 | AACAUUCA  | 5248 | 3 UTR | 0.0449 | 1 |
| <u>PWP2</u>     | <u>NM_005049</u>    | 8  | 3100 | AACAUUCA  | 3093 | 3 UTR | 0.0065 | 1 |

|                |                     |    |      |            |      |       |        |   |
|----------------|---------------------|----|------|------------|------|-------|--------|---|
| <u>PWP2</u>    | <u>NM_005049</u>    | 7  | 3099 | ACAUUCA    | 3093 | 3 UTR | 0.0257 | 2 |
| <u>PWP2</u>    | <u>NM_005049</u>    | 8  | 3100 | AACAUUCA   | 3093 | 3 UTR | 0.0065 | 1 |
| <u>PWP2</u>    | <u>NM_005049</u>    | 7  | 3099 | ACAUUCA    | 3093 | 3 UTR | 0.0257 | 2 |
| <u>PXMP2</u>   | <u>NM_018663</u>    | 7  | 813  | ACAUUCA    | 807  | 3 UTR | 0.0196 | 2 |
| <u>PXMP2</u>   | <u>NM_018663</u>    | 7  | 813  | ACAUUCA    | 807  | 3 UTR | 0.0196 | 2 |
| <u>QSOX2</u>   | <u>NM_181701</u>    | 9  | 4003 | ACAUUCAAC  | 3995 | 3 UTR | 0.0092 | 2 |
| <u>QSOX2</u>   | <u>NM_181701</u>    | 9  | 4003 | ACAUUCAAC  | 3995 | 3 UTR | 0.0092 | 2 |
| <u>RAB20</u>   | <u>NM_017817</u>    | 7  | 1037 | AACAUUC    | 1031 | 3 UTR | 0.0371 | 1 |
| <u>RAB20</u>   | <u>NM_017817</u>    | 7  | 1037 | AACAUUC    | 1031 | 3 UTR | 0.0371 | 1 |
| <u>RAB38</u>   | <u>NM_022337</u>    | 8  | 1255 | AACAUUCA   | 1248 | 3 UTR | 0.0111 | 1 |
| <u>RAB38</u>   | <u>NM_022337</u>    | 7  | 1254 | ACAUUCA    | 1248 | 3 UTR | 0.0435 | 2 |
| <u>RAB38</u>   | <u>NM_022337</u>    | 8  | 1255 | AACAUUCA   | 1248 | 3 UTR | 0.0111 | 1 |
| <u>RAB38</u>   | <u>NM_022337</u>    | 7  | 1254 | ACAUUCA    | 1248 | 3 UTR | 0.0435 | 2 |
| <u>RAB3IP</u>  | <u>NM_175623</u>    | 10 | 9471 | AACAUUCAAC | 9462 | 3 UTR | 0.0074 | 1 |
| <u>RAB3IP</u>  | <u>NM_175623</u>    | 9  | 9470 | ACAUUCAAC  | 9462 | 3 UTR | 0.0292 | 2 |
| <u>RAB3IP</u>  | <u>NM_175623</u>    | 10 | 9471 | AACAUUCAAC | 9462 | 3 UTR | 0.0074 | 1 |
| <u>RAB3IP</u>  | <u>NM_175623</u>    | 9  | 9470 | ACAUUCAAC  | 9462 | 3 UTR | 0.0292 | 2 |
| <u>RAB40B</u>  | <u>NM_006822</u>    | 8  | 1232 | AACAUUCA   | 1225 | 3 UTR | 0.0120 | 1 |
| <u>RAB40B</u>  | <u>NM_006822</u>    | 7  | 1231 | ACAUUCA    | 1225 | 3 UTR | 0.0471 | 2 |
| <u>RAB40B</u>  | <u>NM_006822</u>    | 8  | 1232 | AACAUUCA   | 1225 | 3 UTR | 0.0120 | 1 |
| <u>RAB40B</u>  | <u>NM_006822</u>    | 7  | 1231 | ACAUUCA    | 1225 | 3 UTR | 0.0471 | 2 |
| <u>RABGEF1</u> | <u>NM_014504</u>    | 9  | 2164 | AACAUUCA   | 2156 | 3 UTR | 0.0084 | 1 |
| <u>RABGEF1</u> | <u>NM_014504</u>    | 8  | 2163 | ACAUUCA    | 2156 | 3 UTR | 0.0330 | 2 |
| <u>RABGEF1</u> | <u>NM_014504</u>    | 9  | 2164 | AACAUUCA   | 2156 | 3 UTR | 0.0084 | 1 |
| <u>RABGEF1</u> | <u>NM_014504</u>    | 8  | 2163 | ACAUUCA    | 2156 | 3 UTR | 0.0330 | 2 |
| <u>RABL3</u>   | <u>NM_173825</u>    | 8  | 2990 | AACAUUCA   | 2983 | 3 UTR | 0.0468 | 1 |
| <u>RABL3</u>   | <u>NM_173825</u>    | 8  | 2990 | AACAUUCA   | 2983 | 3 UTR | 0.0468 | 1 |
| <u>RABL5</u>   | <u>NM_001130821</u> | 8  | 1053 | ACAUUCA    | 1046 | 3 UTR | 0.0266 | 2 |
| <u>RABL5</u>   | <u>NM_001130821</u> | 8  | 1053 | ACAUUCA    | 1046 | 3 UTR | 0.0266 | 2 |
| <u>RAD21</u>   | <u>NM_006265</u>    | 9  | 3607 | AACAUUCA   | 3599 | 3 UTR | 0.0060 | 1 |
| <u>RAD21</u>   | <u>NM_006265</u>    | 8  | 3606 | ACAUUCA    | 3599 | 3 UTR | 0.0240 | 2 |
| <u>RAD21</u>   | <u>NM_006265</u>    | 9  | 3607 | AACAUUCA   | 3599 | 3 UTR | 0.0060 | 1 |
| <u>RAD21</u>   | <u>NM_006265</u>    | 8  | 3606 | ACAUUCA    | 3599 | 3 UTR | 0.0240 | 2 |
| <u>RAD23B</u>  | <u>NM_002874</u>    | 8  | 2238 | ACAUUCA    | 2231 | 3 UTR | 0.0379 | 2 |
| <u>RAD23B</u>  | <u>NM_002874</u>    | 8  | 2238 | ACAUUCA    | 2231 | 3 UTR | 0.0379 | 2 |
| <u>RANBP5</u>  | <u>NM_002271</u>    | 8  | 4598 | AACAUUCA   | 4591 | 3 UTR | 0.0373 | 1 |
| <u>RANBP5</u>  | <u>NM_002271</u>    | 8  | 4122 | ACAUUCA    | 4115 | 3 UTR | 0.0373 | 2 |
| <u>RANBP5</u>  | <u>NM_002271</u>    | 8  | 4598 | AACAUUCA   | 4591 | 3 UTR | 0.0373 | 1 |

|               |                     |   |      |           |      |       |        |   |
|---------------|---------------------|---|------|-----------|------|-------|--------|---|
| <u>RANBP5</u> | <u>NM_002271</u>    | 8 | 4122 | ACAUUCA   | 4115 | 3 UTR | 0.0373 | 2 |
| <u>RASAL2</u> | <u>NM_170692</u>    | 8 | 9076 | AACAUUCA  | 9069 | 3 UTR | 0.0181 | 1 |
| <u>RASAL2</u> | <u>NM_170692</u>    | 8 | 9076 | AACAUUCA  | 9069 | 3 UTR | 0.0181 | 1 |
| <u>RASIP1</u> | <u>NM_017805</u>    | 7 | 3204 | AACAUUC   | 3198 | 3 UTR | 0.0135 | 1 |
| <u>RASIP1</u> | <u>NM_017805</u>    | 7 | 3204 | AACAUUC   | 3198 | 3 UTR | 0.0135 | 1 |
| <u>RASSF2</u> | <u>NM_014737</u>    | 9 | 3140 | AACAUUCA  | 3132 | 3 UTR | 0.0161 | 1 |
| <u>RASSF2</u> | <u>NM_014737</u>    | 9 | 3140 | AACAUUCA  | 3132 | 3 UTR | 0.0161 | 1 |
| <u>RASSF6</u> | <u>NM_201431</u>    | 8 | 1360 | ACAUUCA   | 1353 | 3 UTR | 0.0461 | 2 |
| <u>RASSF6</u> | <u>NM_201431</u>    | 8 | 1360 | ACAUUCA   | 1353 | 3 UTR | 0.0461 | 2 |
| <u>RBBP7</u>  | <u>NM_002893</u>    | 7 | 1832 | AACAUUC   | 1826 | 3 UTR | 0.0232 | 1 |
| <u>RBBP7</u>  | <u>NM_002893</u>    | 9 | 1669 | ACAUUCAAC | 1661 | 3 UTR | 0.0015 | 2 |
| <u>RBBP7</u>  | <u>NM_002893</u>    | 7 | 1832 | AACAUUC   | 1826 | 3 UTR | 0.0232 | 1 |
| <u>RBBP7</u>  | <u>NM_002893</u>    | 9 | 1669 | ACAUUCAAC | 1661 | 3 UTR | 0.0015 | 2 |
| <u>RBM14</u>  | <u>NM_006328</u>    | 8 | 2949 | ACAUUCA   | 2942 | 3 UTR | 0.0486 | 2 |
| <u>RBM14</u>  | <u>NM_006328</u>    | 8 | 2949 | ACAUUCA   | 2942 | 3 UTR | 0.0486 | 2 |
| <u>RBM26</u>  | <u>NM_022118</u>    | 8 | 3355 | AACAUUCA  | 3348 | 3 UTR | 0.0101 | 1 |
| <u>RBM26</u>  | <u>NM_022118</u>    | 7 | 3354 | ACAUUCA   | 3348 | 3 UTR | 0.0399 | 2 |
| <u>RBM26</u>  | <u>NM_022118</u>    | 8 | 3355 | AACAUUCA  | 3348 | 3 UTR | 0.0101 | 1 |
| <u>RBM26</u>  | <u>NM_022118</u>    | 7 | 3354 | ACAUUCA   | 3348 | 3 UTR | 0.0399 | 2 |
| <u>RBM27</u>  | <u>NM_018989</u>    | 8 | 4690 | AACAUUCA  | 4683 | 3 UTR | 0.0477 | 1 |
| <u>RBM27</u>  | <u>NM_018989</u>    | 8 | 4690 | AACAUUCA  | 4683 | 3 UTR | 0.0477 | 1 |
| <u>RBM35A</u> | <u>NM_017697</u>    | 8 | 3436 | ACAUUCA   | 3429 | 3 UTR | 0.0238 | 2 |
| <u>RBM35A</u> | <u>NM_017697</u>    | 8 | 3436 | ACAUUCA   | 3429 | 3 UTR | 0.0238 | 2 |
| <u>RCBTB2</u> | <u>NM_001268</u>    | 9 | 2219 | AACAUUCA  | 2211 | 3 UTR | 0.0045 | 1 |
| <u>RCBTB2</u> | <u>NM_001268</u>    | 8 | 2218 | ACAUUCA   | 2211 | 3 UTR | 0.0178 | 2 |
| <u>RCBTB2</u> | <u>NM_001268</u>    | 9 | 2219 | AACAUUCA  | 2211 | 3 UTR | 0.0045 | 1 |
| <u>RCBTB2</u> | <u>NM_001268</u>    | 8 | 2218 | ACAUUCA   | 2211 | 3 UTR | 0.0178 | 2 |
| <u>RDH12</u>  | <u>NM_152443</u>    | 7 | 1425 | AACAUUC   | 1419 | 3 UTR | 0.0394 | 1 |
| <u>RDH12</u>  | <u>NM_152443</u>    | 7 | 1425 | AACAUUC   | 1419 | 3 UTR | 0.0394 | 1 |
| <u>REC8</u>   | <u>NM_001048205</u> | 7 | 2267 | ACAUUCA   | 2261 | 3 UTR | 0.0110 | 2 |
| <u>REC8</u>   | <u>NM_001048205</u> | 7 | 2267 | ACAUUCA   | 2261 | 3 UTR | 0.0110 | 2 |
| <u>RECK</u>   | <u>NM_021111</u>    | 8 | 4124 | ACAUUCA   | 4117 | 3 UTR | 0.0215 | 2 |
| <u>RECK</u>   | <u>NM_021111</u>    | 8 | 4124 | ACAUUCA   | 4117 | 3 UTR | 0.0215 | 2 |
| <u>RECQL</u>  | <u>NM_002907</u>    | 8 | 2505 | AACAUUCA  | 2498 | 3 UTR | 0.0196 | 1 |
| <u>RECQL</u>  | <u>NM_002907</u>    | 8 | 2505 | AACAUUCA  | 2498 | 3 UTR | 0.0196 | 1 |
| <u>REEP1</u>  | <u>NM_022912</u>    | 8 | 3298 | AACAUUCA  | 3291 | 3 UTR | 0.0465 | 1 |
| <u>REEP1</u>  | <u>NM_022912</u>    | 8 | 3298 | AACAUUCA  | 3291 | 3 UTR | 0.0465 | 1 |
| <u>REEP5</u>  | <u>NM_005669</u>    | 8 | 2858 | ACAUUCA   | 2851 | 3 UTR | 0.0360 | 2 |

|                |                  |    |      |            |      |       |        |   |
|----------------|------------------|----|------|------------|------|-------|--------|---|
| <u>REEP5</u>   | <u>NM_005669</u> | 8  | 2858 | ACAUCAA    | 2851 | 3 UTR | 0.0360 | 2 |
| <u>REG4</u>    | <u>NM_032044</u> | 7  | 1310 | ACAUUCA    | 1304 | 3 UTR | 0.0325 | 2 |
| <u>REG4</u>    | <u>NM_032044</u> | 7  | 1310 | ACAUUCA    | 1304 | 3 UTR | 0.0325 | 2 |
| <u>RERE</u>    | <u>NM_012102</u> | 8  | 6419 | AACAUUCA   | 6412 | 3 UTR | 0.0403 | 1 |
| <u>RERE</u>    | <u>NM_012102</u> | 8  | 6419 | AACAUUCA   | 6412 | 3 UTR | 0.0403 | 1 |
| <u>RFC3</u>    | <u>NM_002915</u> | 10 | 2263 | AACAUUCAAC | 2254 | 3 UTR | 0.0012 | 1 |
| <u>RFC3</u>    | <u>NM_002915</u> | 9  | 2262 | ACAUUCAAC  | 2254 | 3 UTR | 0.0046 | 2 |
| <u>RFC3</u>    | <u>NM_002915</u> | 10 | 2263 | AACAUUCAAC | 2254 | 3 UTR | 0.0012 | 1 |
| <u>RFC3</u>    | <u>NM_002915</u> | 9  | 2262 | ACAUUCAAC  | 2254 | 3 UTR | 0.0046 | 2 |
| <u>RFK</u>     | <u>NM_018339</u> | 8  | 2664 | AACAUUCA   | 2657 | 3 UTR | 0.0285 | 1 |
| <u>RFK</u>     | <u>NM_018339</u> | 8  | 2664 | AACAUUCA   | 2657 | 3 UTR | 0.0285 | 1 |
| <u>RG9MTD1</u> | <u>NM_017819</u> | 7  | 1387 | ACAUUCA    | 1381 | 3 UTR | 0.0164 | 2 |
| <u>RG9MTD1</u> | <u>NM_017819</u> | 7  | 1387 | ACAUUCA    | 1381 | 3 UTR | 0.0164 | 2 |
| <u>RGS13</u>   | <u>NM_002927</u> | 8  | 1152 | AACAUUCA   | 1145 | 3 UTR | 0.0112 | 1 |
| <u>RGS13</u>   | <u>NM_002927</u> | 7  | 1151 | ACAUUCA    | 1145 | 3 UTR | 0.0440 | 2 |
| <u>RGS13</u>   | <u>NM_002927</u> | 8  | 1152 | AACAUUCA   | 1145 | 3 UTR | 0.0112 | 1 |
| <u>RGS13</u>   | <u>NM_002927</u> | 7  | 1151 | ACAUUCA    | 1145 | 3 UTR | 0.0440 | 2 |
| <u>RGS18</u>   | <u>NM_130782</u> | 8  | 1323 | AACAUUCA   | 1316 | 3 UTR | 0.0193 | 1 |
| <u>RGS18</u>   | <u>NM_130782</u> | 8  | 1323 | AACAUUCA   | 1316 | 3 UTR | 0.0193 | 1 |
| <u>RGS22</u>   | <u>NM_015668</u> | 8  | 4009 | AACAUUCA   | 4002 | 3 UTR | 0.0030 | 1 |
| <u>RGS22</u>   | <u>NM_015668</u> | 7  | 4008 | ACAUUCA    | 4002 | 3 UTR | 0.0118 | 2 |
| <u>RGS22</u>   | <u>NM_015668</u> | 8  | 4009 | AACAUUCA   | 4002 | 3 UTR | 0.0030 | 1 |
| <u>RGS22</u>   | <u>NM_015668</u> | 7  | 4008 | ACAUUCA    | 4002 | 3 UTR | 0.0118 | 2 |
| <u>RHOG</u>    | <u>NM_001665</u> | 7  | 1202 | ACAUUCA    | 1196 | 3 UTR | 0.0358 | 2 |
| <u>RHOG</u>    | <u>NM_001665</u> | 7  | 1202 | ACAUUCA    | 1196 | 3 UTR | 0.0358 | 2 |
| <u>RIOK2</u>   | <u>NM_018343</u> | 7  | 3054 | AACAUUC    | 3048 | 3 UTR | 0.0075 | 1 |
| <u>RIOK2</u>   | <u>NM_018343</u> | 7  | 3054 | AACAUUC    | 3048 | 3 UTR | 0.0075 | 1 |
| <u>RLBP1L1</u> | <u>NM_173519</u> | 8  | 3402 | AACAUUCA   | 3395 | 3 UTR | 0.0318 | 1 |
| <u>RLBP1L1</u> | <u>NM_173519</u> | 8  | 3402 | AACAUUCA   | 3395 | 3 UTR | 0.0318 | 1 |
| <u>RLF</u>     | <u>NM_012421</u> | 8  | 6160 | ACAUCAA    | 6153 | 3 UTR | 0.0074 | 2 |
| <u>RLF</u>     | <u>NM_012421</u> | 7  | 5907 | ACAUUCA    | 5901 | 3 UTR | 0.0295 | 2 |
| <u>RLF</u>     | <u>NM_012421</u> | 8  | 6160 | ACAUCAA    | 6153 | 3 UTR | 0.0074 | 2 |
| <u>RLF</u>     | <u>NM_012421</u> | 7  | 5907 | ACAUUCA    | 5901 | 3 UTR | 0.0295 | 2 |
| <u>RNASE4</u>  | <u>NM_002937</u> | 7  | 1498 | AACAUUC    | 1492 | 3 UTR | 0.0475 | 1 |
| <u>RNASE4</u>  | <u>NM_002937</u> | 7  | 1498 | AACAUUC    | 1492 | 3 UTR | 0.0475 | 1 |
| <u>RNF125</u>  | <u>NM_017831</u> | 9  | 5695 | AACAUUCA   | 5687 | 3 UTR | 0.0182 | 1 |
| <u>RNF125</u>  | <u>NM_017831</u> | 9  | 5695 | AACAUUCA   | 5687 | 3 UTR | 0.0182 | 1 |
| <u>RNF13</u>   | <u>NM_007282</u> | 9  | 2931 | AACAUUCA   | 2923 | 3 UTR | 0.0039 | 1 |



|                     |                  |   |      |           |      |       |        |   |
|---------------------|------------------|---|------|-----------|------|-------|--------|---|
| <u>RNF13</u>        | <u>NM_007282</u> | 8 | 2930 | ACAUUCA   | 2923 | 3 UTR | 0.0157 | 2 |
| <u>RNF13</u>        | <u>NM_007282</u> | 9 | 2931 | AACAUUCA  | 2923 | 3 UTR | 0.0039 | 1 |
| <u>RNF13</u>        | <u>NM_007282</u> | 8 | 2930 | ACAUUCA   | 2923 | 3 UTR | 0.0157 | 2 |
| <u>RNF141</u>       | <u>NM_016422</u> | 8 | 3466 | AACAUUCA  | 3459 | 3 UTR | 0.0482 | 1 |
| <u>RNF141</u>       | <u>NM_016422</u> | 8 | 3466 | AACAUUCA  | 3459 | 3 UTR | 0.0482 | 1 |
| <u>RNF146</u>       | <u>NM_030963</u> | 7 | 2017 | AACAUUC   | 2011 | 3 UTR | 0.0408 | 1 |
| <u>RNF146</u>       | <u>NM_030963</u> | 7 | 2017 | AACAUUC   | 2011 | 3 UTR | 0.0408 | 1 |
| <u>RNF182</u>       | <u>NM_152737</u> | 9 | 2513 | ACAUUCAAC | 2505 | 3 UTR | 0.0082 | 2 |
| <u>RNF182</u>       | <u>NM_152737</u> | 9 | 2513 | ACAUUCAAC | 2505 | 3 UTR | 0.0082 | 2 |
| <u>RNF34</u>        | <u>NM_194271</u> | 8 | 1747 | AACAUUCA  | 1740 | 3 UTR | 0.0122 | 1 |
| <u>RNF34</u>        | <u>NM_194271</u> | 7 | 1794 | ACAUUCA   | 1788 | 3 UTR | 0.0480 | 2 |
| <u>RNF34</u>        | <u>NM_194271</u> | 7 | 1746 | ACAUUCA   | 1740 | 3 UTR | 0.0480 | 2 |
| <u>RNF34</u>        | <u>NM_194271</u> | 8 | 1747 | AACAUUCA  | 1740 | 3 UTR | 0.0122 | 1 |
| <u>RNF34</u>        | <u>NM_194271</u> | 7 | 1794 | ACAUUCA   | 1788 | 3 UTR | 0.0480 | 2 |
| <u>RNF34</u>        | <u>NM_194271</u> | 7 | 1746 | ACAUUCA   | 1740 | 3 UTR | 0.0480 | 2 |
| <u>RNF38</u>        | <u>NM_194328</u> | 9 | 2834 | AACAUUCA  | 2826 | 3 UTR | 0.0127 | 1 |
| <u>RNF38</u>        | <u>NM_194328</u> | 8 | 2833 | ACAUUCA   | 2826 | 3 UTR | 0.0500 | 2 |
| <u>RNF38</u>        | <u>NM_194328</u> | 9 | 2834 | AACAUUCA  | 2826 | 3 UTR | 0.0127 | 1 |
| <u>RNF38</u>        | <u>NM_194328</u> | 8 | 2833 | ACAUUCA   | 2826 | 3 UTR | 0.0500 | 2 |
| <u>RNF6</u>         | <u>NM_005977</u> | 8 | 2992 | AACAUUCA  | 2985 | 3 UTR | 0.0160 | 1 |
| <u>RNF6</u>         | <u>NM_005977</u> | 8 | 2575 | AACAUUCA  | 2568 | 3 UTR | 0.0160 | 1 |
| <u>RNF6</u>         | <u>NM_005977</u> | 8 | 2992 | AACAUUCA  | 2985 | 3 UTR | 0.0160 | 1 |
| <u>RNF6</u>         | <u>NM_005977</u> | 8 | 2575 | AACAUUCA  | 2568 | 3 UTR | 0.0160 | 1 |
| <u>RNF8</u>         | <u>NM_003958</u> | 9 | 2415 | AACAUUCA  | 2407 | 3 UTR | 0.0151 | 1 |
| <u>RNF8</u>         | <u>NM_003958</u> | 9 | 2415 | AACAUUCA  | 2407 | 3 UTR | 0.0151 | 1 |
| <u>RNMT</u>         | <u>NM_003799</u> | 9 | 2090 | ACAUUCAAC | 2082 | 3 UTR | 0.0173 | 2 |
| <u>RNMT</u>         | <u>NM_003799</u> | 9 | 2090 | ACAUUCAAC | 2082 | 3 UTR | 0.0173 | 2 |
| <u>ROD1</u>         | <u>NM_005156</u> | 9 | 4289 | ACAUUCAAC | 4281 | 3 UTR | 0.0204 | 2 |
| <u>ROD1</u>         | <u>NM_005156</u> | 9 | 4289 | ACAUUCAAC | 4281 | 3 UTR | 0.0204 | 2 |
| <u>RP2</u>          | <u>NM_006915</u> | 8 | 3529 | AACAUUCA  | 3522 | 3 UTR | 0.0387 | 1 |
| <u>RP2</u>          | <u>NM_006915</u> | 8 | 3529 | AACAUUCA  | 3522 | 3 UTR | 0.0387 | 1 |
| <u>RP5-1022P6.2</u> | <u>NM_019593</u> | 8 | 4630 | AACAUUCA  | 4623 | 3 UTR | 0.0483 | 1 |
| <u>RP5-1022P6.2</u> | <u>NM_019593</u> | 8 | 3397 | AACAUUCA  | 3390 | 3 UTR | 0.0483 | 1 |
| <u>RP5-1022P6.2</u> | <u>NM_019593</u> | 8 | 4630 | AACAUUCA  | 4623 | 3 UTR | 0.0483 | 1 |
| <u>RP5-1022P6.2</u> | <u>NM_019593</u> | 8 | 3397 | AACAUUCA  | 3390 | 3 UTR | 0.0483 | 1 |
| <u>RPAP2</u>        | <u>NM_024813</u> | 8 | 2220 | AACAUUCA  | 2213 | 3 UTR | 0.0176 | 1 |
| <u>RPAP2</u>        | <u>NM_024813</u> | 8 | 2220 | AACAUUCA  | 2213 | 3 UTR | 0.0176 | 1 |
| <u>RPAP3</u>        | <u>NM_024604</u> | 8 | 3395 | AACAUUCA  | 3388 | 3 UTR | 0.0036 | 1 |

|                |                     |   |       |           |       |       |        |   |
|----------------|---------------------|---|-------|-----------|-------|-------|--------|---|
| <u>RPAP3</u>   | <u>NM_024604</u>    | 7 | 3394  | ACAUUCA   | 3388  | 3 UTR | 0.0142 | 2 |
| <u>RPAP3</u>   | <u>NM_024604</u>    | 8 | 3395  | AACAUUCA  | 3388  | 3 UTR | 0.0036 | 1 |
| <u>RPAP3</u>   | <u>NM_024604</u>    | 7 | 3394  | ACAUUCA   | 3388  | 3 UTR | 0.0142 | 2 |
| <u>RPE65</u>   | <u>NM_000329</u>    | 8 | 2207  | AACAUUCA  | 2200  | 3 UTR | 0.0144 | 1 |
| <u>RPE65</u>   | <u>NM_000329</u>    | 8 | 2207  | AACAUUCA  | 2200  | 3 UTR | 0.0144 | 1 |
| <u>RPL15</u>   | <u>NM_002948</u>    | 9 | 1241  | ACAUUCAAC | 1233  | 3 UTR | 0.0052 | 2 |
| <u>RPL15</u>   | <u>NM_002948</u>    | 9 | 1241  | ACAUUCAAC | 1233  | 3 UTR | 0.0052 | 2 |
| <u>RPN2</u>    | <u>NM_002951</u>    | 7 | 2237  | ACAUUCA   | 2231  | 3 UTR | 0.0204 | 2 |
| <u>RPN2</u>    | <u>NM_002951</u>    | 7 | 2237  | ACAUUCA   | 2231  | 3 UTR | 0.0204 | 2 |
| <u>RPS6KA3</u> | <u>NM_004586</u>    | 9 | 2865  | ACAUUCAAC | 2857  | 3 UTR | 0.0208 | 2 |
| <u>RPS6KA3</u> | <u>NM_004586</u>    | 9 | 2865  | ACAUUCAAC | 2857  | 3 UTR | 0.0208 | 2 |
| <u>RPS6KC1</u> | <u>NM_012424</u>    | 9 | 3907  | ACAUUCAAC | 3899  | 3 UTR | 0.0032 | 2 |
| <u>RPS6KC1</u> | <u>NM_012424</u>    | 9 | 3907  | ACAUUCAAC | 3899  | 3 UTR | 0.0032 | 2 |
| <u>RRAGA</u>   | <u>NM_006570</u>    | 7 | 1569  | AACAUUC   | 1563  | 3 UTR | 0.0258 | 1 |
| <u>RRAGA</u>   | <u>NM_006570</u>    | 7 | 1569  | AACAUUC   | 1563  | 3 UTR | 0.0258 | 1 |
| <u>RRAGD</u>   | <u>NM_021244</u>    | 7 | 4642  | AACAUUC   | 4636  | 3 UTR | 0.0110 | 1 |
| <u>RRAGD</u>   | <u>NM_021244</u>    | 7 | 4347  | AACAUUC   | 4341  | 3 UTR | 0.0110 | 1 |
| <u>RRAGD</u>   | <u>NM_021244</u>    | 7 | 4642  | AACAUUC   | 4636  | 3 UTR | 0.0110 | 1 |
| <u>RRAGD</u>   | <u>NM_021244</u>    | 7 | 4347  | AACAUUC   | 4341  | 3 UTR | 0.0110 | 1 |
| <u>RSPO2</u>   | <u>NM_178565</u>    | 8 | 2969  | AACAUUCA  | 2962  | 3 UTR | 0.0271 | 1 |
| <u>RSPO2</u>   | <u>NM_178565</u>    | 8 | 2969  | AACAUUCA  | 2962  | 3 UTR | 0.0271 | 1 |
| <u>RTN1</u>    | <u>NM_021136</u>    | 7 | 3309  | AACAUUC   | 3303  | 3 UTR | 0.0469 | 1 |
| <u>RTN1</u>    | <u>NM_021136</u>    | 7 | 3309  | AACAUUC   | 3303  | 3 UTR | 0.0469 | 1 |
| <u>RUFY2</u>   | <u>NM_017987</u>    | 8 | 2301  | AACAUUCA  | 2294  | 3 UTR | 0.0340 | 1 |
| <u>RUFY2</u>   | <u>NM_017987</u>    | 8 | 2301  | AACAUUCA  | 2294  | 3 UTR | 0.0340 | 1 |
| <u>RUSC1</u>   | <u>NM_001105203</u> | 9 | 3484  | ACAUUCAAC | 3476  | 3 UTR | 0.0022 | 2 |
| <u>RUSC1</u>   | <u>NM_001105203</u> | 9 | 3484  | ACAUUCAAC | 3476  | 3 UTR | 0.0022 | 2 |
| <u>RWDD2B</u>  | <u>NM_016940</u>    | 7 | 1155  | AACAUUC   | 1149  | 3 UTR | 0.0398 | 1 |
| <u>RWDD2B</u>  | <u>NM_016940</u>    | 7 | 1155  | AACAUUC   | 1149  | 3 UTR | 0.0398 | 1 |
| <u>RYR3</u>    | <u>NM_001036</u>    | 8 | 15058 | ACAUUCA   | 15051 | 3 UTR | 0.0133 | 2 |
| <u>RYR3</u>    | <u>NM_001036</u>    | 8 | 15058 | ACAUUCA   | 15051 | 3 UTR | 0.0133 | 2 |
| <u>S100Z</u>   | <u>NM_130772</u>    | 7 | 733   | ACAUUCA   | 727   | 3 UTR | 0.0321 | 2 |
| <u>S100Z</u>   | <u>NM_130772</u>    | 7 | 733   | ACAUUCA   | 727   | 3 UTR | 0.0321 | 2 |
| <u>SACS</u>    | <u>NM_014363</u>    | 8 | 14365 | ACAUUCA   | 14358 | 3 UTR | 0.0198 | 2 |
| <u>SACS</u>    | <u>NM_014363</u>    | 8 | 14365 | ACAUUCA   | 14358 | 3 UTR | 0.0198 | 2 |
| <u>SAMHD1</u>  | <u>NM_015474</u>    | 8 | 2127  | ACAUUCA   | 2120  | 3 UTR | 0.0105 | 2 |
| <u>SAMHD1</u>  | <u>NM_015474</u>    | 7 | 2015  | ACAUUCA   | 2009  | 3 UTR | 0.0412 | 2 |
| <u>SAMHD1</u>  | <u>NM_015474</u>    | 8 | 2127  | ACAUUCA   | 2120  | 3 UTR | 0.0105 | 2 |

|                 |                  |   |      |           |      |       |        |   |
|-----------------|------------------|---|------|-----------|------|-------|--------|---|
| <u>SAMHD1</u>   | <u>NM_015474</u> | 7 | 2015 | ACAUUCA   | 2009 | 3 UTR | 0.0412 | 2 |
| <u>SCAPER</u>   | <u>NM_020843</u> | 9 | 4432 | AACAUUCA  | 4424 | 3 UTR | 0.0018 | 1 |
| <u>SCAPER</u>   | <u>NM_020843</u> | 8 | 4431 | ACAUUCA   | 4424 | 3 UTR | 0.0071 | 2 |
| <u>SCAPER</u>   | <u>NM_020843</u> | 9 | 4432 | AACAUUCA  | 4424 | 3 UTR | 0.0018 | 1 |
| <u>SCAPER</u>   | <u>NM_020843</u> | 8 | 4431 | ACAUUCA   | 4424 | 3 UTR | 0.0071 | 2 |
| <u>SCG5</u>     | <u>NM_003020</u> | 7 | 1010 | ACAUUCA   | 1004 | 3 UTR | 0.0293 | 2 |
| <u>SCG5</u>     | <u>NM_003020</u> | 7 | 1010 | ACAUUCA   | 1004 | 3 UTR | 0.0293 | 2 |
| <u>SCHIP1</u>   | <u>NM_014575</u> | 8 | 2004 | AACAUUCA  | 1997 | 3 UTR | 0.0088 | 1 |
| <u>SCHIP1</u>   | <u>NM_014575</u> | 7 | 2003 | ACAUUCA   | 1997 | 3 UTR | 0.0345 | 2 |
| <u>SCHIP1</u>   | <u>NM_014575</u> | 8 | 2004 | AACAUUCA  | 1997 | 3 UTR | 0.0088 | 1 |
| <u>SCHIP1</u>   | <u>NM_014575</u> | 7 | 2003 | ACAUUCA   | 1997 | 3 UTR | 0.0345 | 2 |
| <u>SCOC</u>     | <u>NM_032547</u> | 8 | 771  | AACAUUCA  | 764  | 3 UTR | 0.0218 | 1 |
| <u>SCOC</u>     | <u>NM_032547</u> | 8 | 771  | AACAUUCA  | 764  | 3 UTR | 0.0218 | 1 |
| <u>SDF2L1</u>   | <u>NM_022044</u> | 7 | 865  | AACAUUC   | 859  | 3 UTR | 0.0077 | 1 |
| <u>SDF2L1</u>   | <u>NM_022044</u> | 7 | 865  | AACAUUC   | 859  | 3 UTR | 0.0077 | 1 |
| <u>SEC16B</u>   | <u>NM_033127</u> | 8 | 3851 | ACAUUCA   | 3844 | 3 UTR | 0.0114 | 2 |
| <u>SEC16B</u>   | <u>NM_033127</u> | 8 | 3851 | ACAUUCA   | 3844 | 3 UTR | 0.0114 | 2 |
| <u>SEC24B</u>   | <u>NM_006323</u> | 7 | 4317 | AACAUUC   | 4311 | 3 UTR | 0.0469 | 1 |
| <u>SEC24B</u>   | <u>NM_006323</u> | 7 | 4317 | AACAUUC   | 4311 | 3 UTR | 0.0469 | 1 |
| <u>SECISBP2</u> | <u>NM_024077</u> | 7 | 3368 | ACAUUCA   | 3362 | 3 UTR | 0.0495 | 2 |
| <u>SECISBP2</u> | <u>NM_024077</u> | 7 | 3368 | ACAUUCA   | 3362 | 3 UTR | 0.0495 | 2 |
| <u>SELK</u>     | <u>NM_021237</u> | 7 | 559  | ACAUUCA   | 553  | 3 UTR | 0.0225 | 2 |
| <u>SELK</u>     | <u>NM_021237</u> | 7 | 559  | ACAUUCA   | 553  | 3 UTR | 0.0225 | 2 |
| <u>SELT</u>     | <u>NM_016275</u> | 9 | 3265 | AACAUUCA  | 3257 | 3 UTR | 0.0107 | 1 |
| <u>SELT</u>     | <u>NM_016275</u> | 9 | 2500 | ACAUUCAAC | 2492 | 3 UTR | 0.0107 | 2 |
| <u>SELT</u>     | <u>NM_016275</u> | 9 | 3265 | AACAUUCA  | 3257 | 3 UTR | 0.0107 | 1 |
| <u>SELT</u>     | <u>NM_016275</u> | 9 | 2500 | ACAUUCAAC | 2492 | 3 UTR | 0.0107 | 2 |
| <u>SEMA3B</u>   | <u>NM_004636</u> | 8 | 2682 | ACAUUCA   | 2675 | 3 UTR | 0.0076 | 2 |
| <u>SEMA3B</u>   | <u>NM_004636</u> | 8 | 2682 | ACAUUCA   | 2675 | 3 UTR | 0.0076 | 2 |
| <u>SEMA3C</u>   | <u>NM_006379</u> | 8 | 5070 | AACAUUCA  | 5063 | 3 UTR | 0.0355 | 1 |
| <u>SEMA3C</u>   | <u>NM_006379</u> | 8 | 5070 | AACAUUCA  | 5063 | 3 UTR | 0.0355 | 1 |
| <u>SEMA4C</u>   | <u>NM_017789</u> | 8 | 3249 | AACAUUCA  | 3242 | 3 UTR | 0.0140 | 1 |
| <u>SEMA4C</u>   | <u>NM_017789</u> | 8 | 3249 | AACAUUCA  | 3242 | 3 UTR | 0.0140 | 1 |
| <u>SENP1</u>    | <u>NM_014554</u> | 8 | 3952 | AACAUUCA  | 3945 | 3 UTR | 0.0352 | 1 |
| <u>SENP1</u>    | <u>NM_014554</u> | 8 | 3952 | AACAUUCA  | 3945 | 3 UTR | 0.0352 | 1 |
| <u>SERPINB9</u> | <u>NM_004155</u> | 8 | 3029 | AACAUUCA  | 3022 | 3 UTR | 0.0434 | 1 |
| <u>SERPINB9</u> | <u>NM_004155</u> | 8 | 3029 | AACAUUCA  | 3022 | 3 UTR | 0.0434 | 1 |
| <u>SERPINI1</u> | <u>NM_005025</u> | 7 | 1828 | AACAUUC   | 1822 | 3 UTR | 0.0160 | 1 |

|                 |                     |   |       |           |       |       |        |   |
|-----------------|---------------------|---|-------|-----------|-------|-------|--------|---|
| <u>SERPINI1</u> | <u>NM_005025</u>    | 7 | 1828  | AACAUUC   | 1822  | 3 UTR | 0.0160 | 1 |
| <u>SETX</u>     | <u>NM_015046</u>    | 8 | 8507  | AACAUUCA  | 8500  | 3 UTR | 0.0418 | 1 |
| <u>SETX</u>     | <u>NM_015046</u>    | 8 | 8507  | AACAUUCA  | 8500  | 3 UTR | 0.0418 | 1 |
| <u>SF1</u>      | <u>NM_004630</u>    | 8 | 3291  | AACAUUCA  | 3284  | 3 UTR | 0.0186 | 1 |
| <u>SF1</u>      | <u>NM_004630</u>    | 8 | 3291  | AACAUUCA  | 3284  | 3 UTR | 0.0186 | 1 |
| <u>SF3B3</u>    | <u>NM_012426</u>    | 7 | 6022  | AACAUUC   | 6016  | 3 UTR | 0.0302 | 1 |
| <u>SF3B3</u>    | <u>NM_012426</u>    | 7 | 6022  | AACAUUC   | 6016  | 3 UTR | 0.0302 | 1 |
| <u>SF4</u>      | <u>NM_172231</u>    | 7 | 1997  | AACAUUC   | 1991  | 3 UTR | 0.0098 | 1 |
| <u>SF4</u>      | <u>NM_172231</u>    | 7 | 1997  | AACAUUC   | 1991  | 3 UTR | 0.0098 | 1 |
| <u>SFRP5</u>    | <u>NM_003015</u>    | 7 | 1224  | AACAUUC   | 1218  | 3 UTR | 0.0455 | 1 |
| <u>SFRP5</u>    | <u>NM_003015</u>    | 7 | 1224  | AACAUUC   | 1218  | 3 UTR | 0.0455 | 1 |
| <u>SFRS1</u>    | <u>NM_001078166</u> | 9 | 4561  | AACAUUCA  | 4553  | 3 UTR | 0.0183 | 1 |
| <u>SFRS1</u>    | <u>NM_001078166</u> | 9 | 4561  | AACAUUCA  | 4553  | 3 UTR | 0.0183 | 1 |
| <u>SFRS18</u>   | <u>NM_032870</u>    | 8 | 3181  | ACAUUCA   | 3174  | 3 UTR | 0.0088 | 2 |
| <u>SFRS18</u>   | <u>NM_032870</u>    | 8 | 3181  | ACAUUCA   | 3174  | 3 UTR | 0.0088 | 2 |
| <u>SFRS5</u>    | <u>NM_001039465</u> | 7 | 1341  | ACAUUCA   | 1335  | 3 UTR | 0.0327 | 2 |
| <u>SFRS5</u>    | <u>NM_001039465</u> | 7 | 1341  | ACAUUCA   | 1335  | 3 UTR | 0.0327 | 2 |
| <u>SFT2D1</u>   | <u>NM_145169</u>    | 9 | 546   | AACAUUCA  | 538   | 3 UTR | 0.0008 | 1 |
| <u>SFT2D1</u>   | <u>NM_145169</u>    | 8 | 545   | ACAUUCA   | 538   | 3 UTR | 0.0032 | 2 |
| <u>SFT2D1</u>   | <u>NM_145169</u>    | 9 | 546   | AACAUUCA  | 538   | 3 UTR | 0.0008 | 1 |
| <u>SFT2D1</u>   | <u>NM_145169</u>    | 8 | 545   | ACAUUCA   | 538   | 3 UTR | 0.0032 | 2 |
| <u>SFT2D2</u>   | <u>NM_199344</u>    | 7 | 732   | ACAUUCA   | 726   | 3 UTR | 0.0202 | 2 |
| <u>SFT2D2</u>   | <u>NM_199344</u>    | 7 | 732   | ACAUUCA   | 726   | 3 UTR | 0.0202 | 2 |
| <u>SGK2</u>     | <u>NM_016276</u>    | 7 | 1995  | AACAUUC   | 1989  | 3 UTR | 0.0385 | 1 |
| <u>SGK2</u>     | <u>NM_016276</u>    | 7 | 1995  | AACAUUC   | 1989  | 3 UTR | 0.0385 | 1 |
| <u>SGK269</u>   | <u>NM_024776</u>    | 9 | 11079 | AACAUUCA  | 11071 | 3 UTR | 0.0227 | 1 |
| <u>SGK269</u>   | <u>NM_024776</u>    | 9 | 11079 | AACAUUCA  | 11071 | 3 UTR | 0.0227 | 1 |
| <u>SGK3</u>     | <u>NM_001033578</u> | 9 | 2909  | AACAUUCA  | 2901  | 3 UTR | 0.0093 | 1 |
| <u>SGK3</u>     | <u>NM_001033578</u> | 8 | 2908  | ACAUUCA   | 2901  | 3 UTR | 0.0367 | 2 |
| <u>SGK3</u>     | <u>NM_001033578</u> | 9 | 2909  | AACAUUCA  | 2901  | 3 UTR | 0.0093 | 1 |
| <u>SGK3</u>     | <u>NM_001033578</u> | 8 | 2908  | ACAUUCA   | 2901  | 3 UTR | 0.0367 | 2 |
| <u>SGOL2</u>    | <u>NM_152524</u>    | 9 | 4391  | ACAUUCAAC | 4383  | 3 UTR | 0.0014 | 2 |
| <u>SGOL2</u>    | <u>NM_152524</u>    | 9 | 4391  | ACAUUCAAC | 4383  | 3 UTR | 0.0014 | 2 |
| <u>SH2D3C</u>   | <u>NM_170600</u>    | 7 | 2831  | AACAUUC   | 2825  | 3 UTR | 0.0309 | 1 |
| <u>SH2D3C</u>   | <u>NM_170600</u>    | 7 | 2831  | AACAUUC   | 2825  | 3 UTR | 0.0309 | 1 |
| <u>SHQ1</u>     | <u>NM_018130</u>    | 8 | 2303  | AACAUUCA  | 2296  | 3 UTR | 0.0154 | 1 |
| <u>SHQ1</u>     | <u>NM_018130</u>    | 8 | 2303  | AACAUUCA  | 2296  | 3 UTR | 0.0154 | 1 |
| <u>SIAE</u>     | <u>NM_170601</u>    | 8 | 2389  | AACAUUCA  | 2382  | 3 UTR | 0.0179 | 1 |

|                 |                     |    |      |            |      |       |        |   |
|-----------------|---------------------|----|------|------------|------|-------|--------|---|
| <u>SIAE</u>     | <u>NM_170601</u>    | 8  | 2389 | AACAUUCA   | 2382 | 3 UTR | 0.0179 | 1 |
| <u>SIN3B</u>    | <u>NM_015260</u>    | 8  | 5074 | ACAUUCA    | 5067 | 3 UTR | 0.0245 | 2 |
| <u>SIN3B</u>    | <u>NM_015260</u>    | 8  | 5074 | ACAUUCA    | 5067 | 3 UTR | 0.0245 | 2 |
| <u>SIRT1</u>    | <u>NM_012238</u>    | 8  | 2367 | AACAUUCA   | 2360 | 3 UTR | 0.0272 | 1 |
| <u>SIRT1</u>    | <u>NM_012238</u>    | 8  | 2367 | AACAUUCA   | 2360 | 3 UTR | 0.0272 | 1 |
| <u>SIX2</u>     | <u>NM_016932</u>    | 8  | 2082 | AACAUUCA   | 2075 | 3 UTR | 0.0149 | 1 |
| <u>SIX2</u>     | <u>NM_016932</u>    | 8  | 2082 | AACAUUCA   | 2075 | 3 UTR | 0.0149 | 1 |
| <u>SKP1</u>     | <u>NM_006930</u>    | 9  | 2276 | ACAUUCAAC  | 2268 | 3 UTR | 0.0078 | 2 |
| <u>SKP1</u>     | <u>NM_006930</u>    | 9  | 2276 | ACAUUCAAC  | 2268 | 3 UTR | 0.0078 | 2 |
| <u>SLAIN2</u>   | <u>NM_020846</u>    | 9  | 4346 | AACAUUCA   | 4338 | 3 UTR | 0.0156 | 1 |
| <u>SLAIN2</u>   | <u>NM_020846</u>    | 9  | 4346 | AACAUUCA   | 4338 | 3 UTR | 0.0156 | 1 |
| <u>SLC10A7</u>  | <u>NM_001029998</u> | 8  | 1928 | AACAUUCA   | 1921 | 3 UTR | 0.0375 | 1 |
| <u>SLC10A7</u>  | <u>NM_001029998</u> | 8  | 1363 | AACAUUCA   | 1356 | 3 UTR | 0.0375 | 1 |
| <u>SLC10A7</u>  | <u>NM_001029998</u> | 8  | 1928 | AACAUUCA   | 1921 | 3 UTR | 0.0375 | 1 |
| <u>SLC10A7</u>  | <u>NM_001029998</u> | 8  | 1363 | AACAUUCA   | 1356 | 3 UTR | 0.0375 | 1 |
| <u>SLC11A1</u>  | <u>NM_000578</u>    | 8  | 2403 | AACAUUCA   | 2396 | 3 UTR | 0.0282 | 1 |
| <u>SLC11A1</u>  | <u>NM_000578</u>    | 8  | 2403 | AACAUUCA   | 2396 | 3 UTR | 0.0282 | 1 |
| <u>SLC12A5</u>  | <u>NM_020708</u>    | 8  | 5610 | AACAUUCA   | 5603 | 3 UTR | 0.0385 | 1 |
| <u>SLC12A5</u>  | <u>NM_020708</u>    | 8  | 5610 | AACAUUCA   | 5603 | 3 UTR | 0.0385 | 1 |
| <u>SLC19A2</u>  | <u>NM_006996</u>    | 8  | 2317 | AACAUUCA   | 2310 | 3 UTR | 0.0294 | 1 |
| <u>SLC19A2</u>  | <u>NM_006996</u>    | 8  | 2317 | AACAUUCA   | 2310 | 3 UTR | 0.0294 | 1 |
| <u>SLC22A15</u> | <u>NM_018420</u>    | 8  | 1887 | ACAUUCA    | 1880 | 3 UTR | 0.0441 | 2 |
| <u>SLC22A15</u> | <u>NM_018420</u>    | 8  | 1887 | ACAUUCA    | 1880 | 3 UTR | 0.0441 | 2 |
| <u>SLC22A2</u>  | <u>NM_003058</u>    | 7  | 2455 | ACAUUCA    | 2449 | 3 UTR | 0.0403 | 2 |
| <u>SLC22A2</u>  | <u>NM_003058</u>    | 7  | 2455 | ACAUUCA    | 2449 | 3 UTR | 0.0403 | 2 |
| <u>SLC24A3</u>  | <u>NM_020689</u>    | 10 | 3703 | AACAUUCAAC | 3694 | 3 UTR | 0.0017 | 1 |
| <u>SLC24A3</u>  | <u>NM_020689</u>    | 9  | 3702 | ACAUUCAAC  | 3694 | 3 UTR | 0.0067 | 2 |
| <u>SLC24A3</u>  | <u>NM_020689</u>    | 10 | 3703 | AACAUUCAAC | 3694 | 3 UTR | 0.0017 | 1 |
| <u>SLC24A3</u>  | <u>NM_020689</u>    | 9  | 3702 | ACAUUCAAC  | 3694 | 3 UTR | 0.0067 | 2 |
| <u>SLC25A21</u> | <u>NM_030631</u>    | 7  | 1903 | AACAUUC    | 1897 | 3 UTR | 0.0484 | 1 |
| <u>SLC25A21</u> | <u>NM_030631</u>    | 7  | 1750 | AACAUUC    | 1744 | 3 UTR | 0.0484 | 1 |
| <u>SLC25A21</u> | <u>NM_030631</u>    | 7  | 1903 | AACAUUC    | 1897 | 3 UTR | 0.0484 | 1 |
| <u>SLC25A21</u> | <u>NM_030631</u>    | 7  | 1750 | AACAUUC    | 1744 | 3 UTR | 0.0484 | 1 |
| <u>SLC25A24</u> | <u>NM_013386</u>    | 8  | 2054 | ACAUUCA    | 2047 | 3 UTR | 0.0278 | 2 |
| <u>SLC25A24</u> | <u>NM_013386</u>    | 8  | 2054 | ACAUUCA    | 2047 | 3 UTR | 0.0278 | 2 |
| <u>SLC25A36</u> | <u>NM_001104647</u> | 9  | 3172 | ACAUUCAAC  | 3164 | 3 UTR | 0.0133 | 2 |
| <u>SLC25A36</u> | <u>NM_001104647</u> | 9  | 3172 | ACAUUCAAC  | 3164 | 3 UTR | 0.0133 | 2 |
| <u>SLC25A37</u> | <u>NM_016612</u>    | 8  | 1840 | ACAUUCA    | 1833 | 3 UTR | 0.0105 | 2 |

|                 |                     |   |      |          |      |       |        |   |
|-----------------|---------------------|---|------|----------|------|-------|--------|---|
| <u>SLC25A37</u> | <u>NM_016612</u>    | 7 | 1791 | ACAUUCA  | 1785 | 3 UTR | 0.0415 | 2 |
| <u>SLC25A37</u> | <u>NM_016612</u>    | 8 | 1840 | ACAUUCAA | 1833 | 3 UTR | 0.0105 | 2 |
| <u>SLC25A37</u> | <u>NM_016612</u>    | 7 | 1791 | ACAUUCA  | 1785 | 3 UTR | 0.0415 | 2 |
| <u>SLC25A38</u> | <u>NM_017875</u>    | 8 | 1893 | AACAUUCA | 1886 | 3 UTR | 0.0123 | 1 |
| <u>SLC25A38</u> | <u>NM_017875</u>    | 7 | 1892 | ACAUUCA  | 1886 | 3 UTR | 0.0481 | 2 |
| <u>SLC25A38</u> | <u>NM_017875</u>    | 8 | 1893 | AACAUUCA | 1886 | 3 UTR | 0.0123 | 1 |
| <u>SLC25A38</u> | <u>NM_017875</u>    | 7 | 1892 | ACAUUCA  | 1886 | 3 UTR | 0.0481 | 2 |
| <u>SLC25A4</u>  | <u>NM_001151</u>    | 7 | 1298 | ACAUUCA  | 1292 | 3 UTR | 0.0190 | 2 |
| <u>SLC25A4</u>  | <u>NM_001151</u>    | 7 | 1298 | ACAUUCA  | 1292 | 3 UTR | 0.0190 | 2 |
| <u>SLC25A40</u> | <u>NM_018843</u>    | 7 | 1435 | AACAUUC  | 1429 | 3 UTR | 0.0089 | 1 |
| <u>SLC25A40</u> | <u>NM_018843</u>    | 7 | 1435 | AACAUUC  | 1429 | 3 UTR | 0.0089 | 1 |
| <u>SLC26A9</u>  | <u>NM_052934</u>    | 9 | 4654 | AACAUUCA | 4646 | 3 UTR | 0.0088 | 1 |
| <u>SLC26A9</u>  | <u>NM_052934</u>    | 8 | 4653 | ACAUUCAA | 4646 | 3 UTR | 0.0349 | 2 |
| <u>SLC26A9</u>  | <u>NM_052934</u>    | 9 | 4654 | AACAUUCA | 4646 | 3 UTR | 0.0088 | 1 |
| <u>SLC26A9</u>  | <u>NM_052934</u>    | 8 | 4653 | ACAUUCAA | 4646 | 3 UTR | 0.0349 | 2 |
| <u>SLC2A1</u>   | <u>NM_006516</u>    | 8 | 3193 | ACAUUCAA | 3186 | 3 UTR | 0.0254 | 2 |
| <u>SLC2A1</u>   | <u>NM_006516</u>    | 8 | 3193 | ACAUUCAA | 3186 | 3 UTR | 0.0254 | 2 |
| <u>SLC35C2</u>  | <u>NM_173179</u>    | 8 | 2256 | AACAUUCA | 2249 | 3 UTR | 0.0130 | 1 |
| <u>SLC35C2</u>  | <u>NM_173179</u>    | 8 | 2256 | AACAUUCA | 2249 | 3 UTR | 0.0130 | 1 |
| <u>SLC38A10</u> | <u>NM_001037984</u> | 7 | 3921 | AACAUUC  | 3915 | 3 UTR | 0.0341 | 1 |
| <u>SLC38A10</u> | <u>NM_001037984</u> | 7 | 3921 | AACAUUC  | 3915 | 3 UTR | 0.0341 | 1 |
| <u>SLC38A2</u>  | <u>NM_018976</u>    | 8 | 2310 | ACAUUCAA | 2303 | 3 UTR | 0.0447 | 2 |
| <u>SLC38A2</u>  | <u>NM_018976</u>    | 8 | 2310 | ACAUUCAA | 2303 | 3 UTR | 0.0447 | 2 |
| <u>SLC39A10</u> | <u>NM_001127257</u> | 8 | 3649 | AACAUUCA | 3642 | 3 UTR | 0.0400 | 1 |
| <u>SLC39A10</u> | <u>NM_001127257</u> | 8 | 3649 | AACAUUCA | 3642 | 3 UTR | 0.0400 | 1 |
| <u>SLC39A12</u> | <u>NM_152725</u>    | 7 | 2555 | AACAUUC  | 2549 | 3 UTR | 0.0271 | 1 |
| <u>SLC39A12</u> | <u>NM_152725</u>    | 7 | 2555 | AACAUUC  | 2549 | 3 UTR | 0.0271 | 1 |
| <u>SLC39A14</u> | <u>NM_001128431</u> | 9 | 3497 | AACAUUCA | 3489 | 3 UTR | 0.0115 | 1 |
| <u>SLC39A14</u> | <u>NM_001128431</u> | 8 | 3496 | ACAUUCAA | 3489 | 3 UTR | 0.0454 | 2 |
| <u>SLC39A14</u> | <u>NM_001128431</u> | 9 | 3497 | AACAUUCA | 3489 | 3 UTR | 0.0115 | 1 |
| <u>SLC39A14</u> | <u>NM_001128431</u> | 8 | 3496 | ACAUUCAA | 3489 | 3 UTR | 0.0454 | 2 |
| <u>SLC3A1</u>   | <u>NM_000341</u>    | 8 | 2263 | ACAUUCAA | 2256 | 3 UTR | 0.0033 | 2 |
| <u>SLC3A1</u>   | <u>NM_000341</u>    | 8 | 2263 | ACAUUCAA | 2256 | 3 UTR | 0.0033 | 2 |
| <u>SLC5A8</u>   | <u>NM_145913</u>    | 8 | 3247 | ACAUUCAA | 3240 | 3 UTR | 0.0161 | 2 |
| <u>SLC5A8</u>   | <u>NM_145913</u>    | 8 | 3247 | ACAUUCAA | 3240 | 3 UTR | 0.0161 | 2 |
| <u>SLC5A9</u>   | <u>NM_001011547</u> | 8 | 2402 | ACAUUCAA | 2395 | 3 UTR | 0.0169 | 2 |
| <u>SLC5A9</u>   | <u>NM_001011547</u> | 8 | 2402 | ACAUUCAA | 2395 | 3 UTR | 0.0169 | 2 |
| <u>SLC7A1</u>   | <u>NM_003045</u>    | 9 | 4028 | AACAUUCA | 4020 | 3 UTR | 0.0192 | 1 |

|                 |                     |   |      |           |      |       |        |   |
|-----------------|---------------------|---|------|-----------|------|-------|--------|---|
| <u>SLC7A1</u>   | <u>NM_003045</u>    | 9 | 4028 | AACAUUCA  | 4020 | 3 UTR | 0.0192 | 1 |
| <u>SLC7A6OS</u> | <u>NM_032178</u>    | 7 | 1570 | ACAUUCA   | 1564 | 3 UTR | 0.0394 | 2 |
| <u>SLC7A6OS</u> | <u>NM_032178</u>    | 7 | 1570 | ACAUUCA   | 1564 | 3 UTR | 0.0394 | 2 |
| <u>SLC9A3R1</u> | <u>NM_004252</u>    | 7 | 1476 | ACAUUCA   | 1470 | 3 UTR | 0.0425 | 2 |
| <u>SLC9A3R1</u> | <u>NM_004252</u>    | 7 | 1476 | ACAUUCA   | 1470 | 3 UTR | 0.0425 | 2 |
| <u>SLCO3A1</u>  | <u>NM_013272</u>    | 7 | 4773 | ACAUUCA   | 4767 | 3 UTR | 0.0250 | 2 |
| <u>SLCO3A1</u>  | <u>NM_013272</u>    | 7 | 4773 | ACAUUCA   | 4767 | 3 UTR | 0.0250 | 2 |
| <u>SLFN11</u>   | <u>NM_001104587</u> | 8 | 4193 | AACAUUCA  | 4186 | 3 UTR | 0.0310 | 1 |
| <u>SLFN11</u>   | <u>NM_001104587</u> | 8 | 4193 | AACAUUCA  | 4186 | 3 UTR | 0.0310 | 1 |
| <u>SLMAP</u>    | <u>NM_007159</u>    | 9 | 3964 | AACAUUCA  | 3956 | 3 UTR | 0.0068 | 1 |
| <u>SLMAP</u>    | <u>NM_007159</u>    | 8 | 3963 | ACAUUCA   | 3956 | 3 UTR | 0.0268 | 2 |
| <u>SLMAP</u>    | <u>NM_007159</u>    | 9 | 3964 | AACAUUCA  | 3956 | 3 UTR | 0.0068 | 1 |
| <u>SLMAP</u>    | <u>NM_007159</u>    | 8 | 3963 | ACAUUCA   | 3956 | 3 UTR | 0.0268 | 2 |
| <u>SLN</u>      | <u>NM_003063</u>    | 7 | 665  | AACAUUC   | 659  | 3 UTR | 0.0282 | 1 |
| <u>SLN</u>      | <u>NM_003063</u>    | 7 | 665  | AACAUUC   | 659  | 3 UTR | 0.0282 | 1 |
| <u>SMAD7</u>    | <u>NM_005904</u>    | 8 | 3036 | AACAUUCA  | 3029 | 3 UTR | 0.0232 | 1 |
| <u>SMAD7</u>    | <u>NM_005904</u>    | 8 | 3036 | AACAUUCA  | 3029 | 3 UTR | 0.0232 | 1 |
| <u>SMC6</u>     | <u>NM_024624</u>    | 9 | 4936 | AACAUUCA  | 4928 | 3 UTR | 0.0065 | 1 |
| <u>SMC6</u>     | <u>NM_024624</u>    | 8 | 4935 | ACAUUCA   | 4928 | 3 UTR | 0.0257 | 2 |
| <u>SMC6</u>     | <u>NM_024624</u>    | 9 | 4936 | AACAUUCA  | 4928 | 3 UTR | 0.0065 | 1 |
| <u>SMC6</u>     | <u>NM_024624</u>    | 8 | 4935 | ACAUUCA   | 4928 | 3 UTR | 0.0257 | 2 |
| <u>SNAP25</u>   | <u>NM_003081</u>    | 8 | 958  | AACAUUCA  | 951  | 3 UTR | 0.0184 | 1 |
| <u>SNAP25</u>   | <u>NM_003081</u>    | 8 | 958  | AACAUUCA  | 951  | 3 UTR | 0.0184 | 1 |
| <u>SNAPC3</u>   | <u>NM_001039697</u> | 8 | 2348 | AACAUUCA  | 2341 | 3 UTR | 0.0265 | 1 |
| <u>SNAPC3</u>   | <u>NM_001039697</u> | 8 | 2348 | AACAUUCA  | 2341 | 3 UTR | 0.0265 | 1 |
| <u>SNIP</u>     | <u>NM_025248</u>    | 9 | 5954 | ACAUUCAAC | 5946 | 3 UTR | 0.0124 | 2 |
| <u>SNIP</u>     | <u>NM_025248</u>    | 9 | 5954 | ACAUUCAAC | 5946 | 3 UTR | 0.0124 | 2 |
| <u>SNN</u>      | <u>NM_003498</u>    | 8 | 718  | ACAUUCA   | 711  | 3 UTR | 0.0427 | 2 |
| <u>SNN</u>      | <u>NM_003498</u>    | 8 | 718  | ACAUUCA   | 711  | 3 UTR | 0.0427 | 2 |
| <u>SNX1</u>     | <u>NM_003099</u>    | 9 | 4479 | AACAUUCA  | 4471 | 3 UTR | 0.0249 | 1 |
| <u>SNX1</u>     | <u>NM_003099</u>    | 9 | 4479 | AACAUUCA  | 4471 | 3 UTR | 0.0249 | 1 |
| <u>SNX13</u>    | <u>NM_015132</u>    | 9 | 5492 | AACAUUCA  | 5484 | 3 UTR | 0.0124 | 1 |
| <u>SNX13</u>    | <u>NM_015132</u>    | 8 | 5491 | ACAUUCA   | 5484 | 3 UTR | 0.0489 | 2 |
| <u>SNX13</u>    | <u>NM_015132</u>    | 9 | 5492 | AACAUUCA  | 5484 | 3 UTR | 0.0124 | 1 |
| <u>SNX13</u>    | <u>NM_015132</u>    | 8 | 5491 | ACAUUCA   | 5484 | 3 UTR | 0.0489 | 2 |
| <u>SOAT2</u>    | <u>NM_003578</u>    | 7 | 1964 | ACAUUCA   | 1958 | 3 UTR | 0.0251 | 2 |
| <u>SOAT2</u>    | <u>NM_003578</u>    | 7 | 1964 | ACAUUCA   | 1958 | 3 UTR | 0.0251 | 2 |
| <u>SOBP</u>     | <u>NM_018013</u>    | 8 | 5751 | AACAUUCA  | 5744 | 3 UTR | 0.0465 | 1 |

|                |                     |    |      |            |      |       |        |   |
|----------------|---------------------|----|------|------------|------|-------|--------|---|
| <u>SOBP</u>    | <u>NM_018013</u>    | 8  | 5751 | AACAUUCA   | 5744 | 3 UTR | 0.0465 | 1 |
| <u>SOCS4</u>   | <u>NM_199421</u>    | 10 | 6930 | AACAUUCAAC | 6921 | 3 UTR | 0.0049 | 1 |
| <u>SOCS4</u>   | <u>NM_199421</u>    | 9  | 6929 | ACAUUCAAC  | 6921 | 3 UTR | 0.0194 | 2 |
| <u>SOCS4</u>   | <u>NM_199421</u>    | 10 | 6930 | AACAUUCAAC | 6921 | 3 UTR | 0.0049 | 1 |
| <u>SOCS4</u>   | <u>NM_199421</u>    | 9  | 6929 | ACAUUCAAC  | 6921 | 3 UTR | 0.0194 | 2 |
| <u>SOD3</u>    | <u>NM_003102</u>    | 7  | 1486 | AACAUUC    | 1480 | 3 UTR | 0.0370 | 1 |
| <u>SOD3</u>    | <u>NM_003102</u>    | 7  | 1486 | AACAUUC    | 1480 | 3 UTR | 0.0370 | 1 |
| <u>SORBS2</u>  | <u>NM_021069</u>    | 8  | 4796 | ACAUUCAA   | 4789 | 3 UTR | 0.0328 | 2 |
| <u>SORBS2</u>  | <u>NM_021069</u>    | 8  | 4796 | ACAUUCAA   | 4789 | 3 UTR | 0.0328 | 2 |
| <u>SOX17</u>   | <u>NM_022454</u>    | 8  | 1722 | ACAUUCAA   | 1715 | 3 UTR | 0.0137 | 2 |
| <u>SOX17</u>   | <u>NM_022454</u>    | 8  | 1722 | ACAUUCAA   | 1715 | 3 UTR | 0.0137 | 2 |
| <u>SOX6</u>    | <u>NM_017508</u>    | 8  | 3178 | ACAUUCAA   | 3171 | 3 UTR | 0.0383 | 2 |
| <u>SOX6</u>    | <u>NM_017508</u>    | 8  | 3178 | ACAUUCAA   | 3171 | 3 UTR | 0.0383 | 2 |
| <u>SPAG1</u>   | <u>NM_003114</u>    | 8  | 3722 | ACAUUCAA   | 3715 | 3 UTR | 0.0136 | 2 |
| <u>SPAG1</u>   | <u>NM_003114</u>    | 8  | 3722 | ACAUUCAA   | 3715 | 3 UTR | 0.0136 | 2 |
| <u>SPATA1</u>  | <u>NM_001081472</u> | 7  | 1931 | ACAUUCA    | 1925 | 3 UTR | 0.0242 | 2 |
| <u>SPATA1</u>  | <u>NM_001081472</u> | 7  | 1931 | ACAUUCA    | 1925 | 3 UTR | 0.0242 | 2 |
| <u>SPECC1L</u> | <u>NM_015330</u>    | 8  | 6269 | ACAUUCAA   | 6262 | 3 UTR | 0.0400 | 2 |
| <u>SPECC1L</u> | <u>NM_015330</u>    | 8  | 6269 | ACAUUCAA   | 6262 | 3 UTR | 0.0400 | 2 |
| <u>SPG21</u>   | <u>NM_016630</u>    | 8  | 1503 | AACAUUCA   | 1496 | 3 UTR | 0.0093 | 1 |
| <u>SPG21</u>   | <u>NM_016630</u>    | 7  | 1502 | ACAUUCA    | 1496 | 3 UTR | 0.0368 | 2 |
| <u>SPG21</u>   | <u>NM_016630</u>    | 8  | 1503 | AACAUUCA   | 1496 | 3 UTR | 0.0093 | 1 |
| <u>SPG21</u>   | <u>NM_016630</u>    | 7  | 1502 | ACAUUCA    | 1496 | 3 UTR | 0.0368 | 2 |
| <u>SPIRE1</u>  | <u>NM_001128626</u> | 8  | 3030 | ACAUUCAA   | 3023 | 3 UTR | 0.0466 | 2 |
| <u>SPIRE1</u>  | <u>NM_001128626</u> | 8  | 3030 | ACAUUCAA   | 3023 | 3 UTR | 0.0466 | 2 |
| <u>SPOCK3</u>  | <u>NM_016950</u>    | 10 | 2785 | AACAUUCAAC | 2776 | 3 UTR | 0.0015 | 1 |
| <u>SPOCK3</u>  | <u>NM_016950</u>    | 9  | 2784 | ACAUUCAAC  | 2776 | 3 UTR | 0.0058 | 2 |
| <u>SPOCK3</u>  | <u>NM_016950</u>    | 10 | 2785 | AACAUUCAAC | 2776 | 3 UTR | 0.0015 | 1 |
| <u>SPOCK3</u>  | <u>NM_016950</u>    | 9  | 2784 | ACAUUCAAC  | 2776 | 3 UTR | 0.0058 | 2 |
| <u>SPP1</u>    | <u>NM_001040058</u> | 9  | 1221 | ACAUUCAAC  | 1213 | 3 UTR | 0.0020 | 2 |
| <u>SPP1</u>    | <u>NM_001040058</u> | 9  | 1221 | ACAUUCAAC  | 1213 | 3 UTR | 0.0020 | 2 |
| <u>SPSB1</u>   | <u>NM_025106</u>    | 8  | 2882 | AACAUUCA   | 2875 | 3 UTR | 0.0296 | 1 |
| <u>SPSB1</u>   | <u>NM_025106</u>    | 8  | 2882 | AACAUUCA   | 2875 | 3 UTR | 0.0296 | 1 |
| <u>SPTLC1</u>  | <u>NM_006415</u>    | 9  | 2641 | AACAUUCAA  | 2633 | 3 UTR | 0.0050 | 1 |
| <u>SPTLC1</u>  | <u>NM_006415</u>    | 8  | 2640 | ACAUUCAA   | 2633 | 3 UTR | 0.0199 | 2 |
| <u>SPTLC1</u>  | <u>NM_006415</u>    | 9  | 2641 | AACAUUCAA  | 2633 | 3 UTR | 0.0050 | 1 |
| <u>SPTLC1</u>  | <u>NM_006415</u>    | 8  | 2640 | ACAUUCAA   | 2633 | 3 UTR | 0.0199 | 2 |
| <u>SPTLC3</u>  | <u>NM_018327</u>    | 8  | 3520 | AACAUUCA   | 3513 | 3 UTR | 0.0287 | 1 |



|                   |                  |   |      |          |      |       |        |   |
|-------------------|------------------|---|------|----------|------|-------|--------|---|
| <u>SPTLC3</u>     | <u>NM_018327</u> | 8 | 3520 | AACAUUCA | 3513 | 3 UTR | 0.0287 | 1 |
| <u>SREBF2</u>     | <u>NM_004599</u> | 7 | 4045 | AACAUUC  | 4039 | 3 UTR | 0.0436 | 1 |
| <u>SREBF2</u>     | <u>NM_004599</u> | 7 | 4045 | AACAUUC  | 4039 | 3 UTR | 0.0436 | 1 |
| <u>SRF</u>        | <u>NM_003131</u> | 8 | 4177 | ACAUUCA  | 4170 | 3 UTR | 0.0351 | 2 |
| <u>SRF</u>        | <u>NM_003131</u> | 8 | 4177 | ACAUUCA  | 4170 | 3 UTR | 0.0351 | 2 |
| <u>SRPK2</u>      | <u>NM_182691</u> | 8 | 3532 | ACAUUCA  | 3525 | 3 UTR | 0.0224 | 2 |
| <u>SRPK2</u>      | <u>NM_182691</u> | 8 | 3532 | ACAUUCA  | 3525 | 3 UTR | 0.0224 | 2 |
| <u>SS18L1</u>     | <u>NM_198935</u> | 9 | 3623 | AACAUUCA | 3615 | 3 UTR | 0.0126 | 1 |
| <u>SS18L1</u>     | <u>NM_198935</u> | 8 | 3622 | ACAUUCA  | 3615 | 3 UTR | 0.0494 | 2 |
| <u>SS18L1</u>     | <u>NM_198935</u> | 9 | 3623 | AACAUUCA | 3615 | 3 UTR | 0.0126 | 1 |
| <u>SS18L1</u>     | <u>NM_198935</u> | 8 | 3622 | ACAUUCA  | 3615 | 3 UTR | 0.0494 | 2 |
| <u>SS18L2</u>     | <u>NM_016305</u> | 8 | 384  | ACAUUCA  | 377  | 3 UTR | 0.0075 | 2 |
| <u>SS18L2</u>     | <u>NM_016305</u> | 8 | 384  | ACAUUCA  | 377  | 3 UTR | 0.0075 | 2 |
| <u>SSB</u>        | <u>NM_003142</u> | 8 | 1508 | ACAUUCA  | 1501 | 3 UTR | 0.0052 | 2 |
| <u>SSB</u>        | <u>NM_003142</u> | 8 | 1508 | ACAUUCA  | 1501 | 3 UTR | 0.0052 | 2 |
| <u>SSH2</u>       | <u>NM_033389</u> | 9 | 6382 | AACAUUCA | 6374 | 3 UTR | 0.0185 | 1 |
| <u>SSH2</u>       | <u>NM_033389</u> | 9 | 6382 | AACAUUCA | 6374 | 3 UTR | 0.0185 | 1 |
| <u>ST6GALNAC3</u> | <u>NM_152996</u> | 8 | 3086 | AACAUUCA | 3079 | 3 UTR | 0.0321 | 1 |
| <u>ST6GALNAC3</u> | <u>NM_152996</u> | 8 | 3086 | AACAUUCA | 3079 | 3 UTR | 0.0321 | 1 |
| <u>ST6GALNAC5</u> | <u>NM_030965</u> | 8 | 1394 | AACAUUCA | 1387 | 3 UTR | 0.0131 | 1 |
| <u>ST6GALNAC5</u> | <u>NM_030965</u> | 8 | 1394 | AACAUUCA | 1387 | 3 UTR | 0.0131 | 1 |
| <u>STAC3</u>      | <u>NM_145064</u> | 7 | 1614 | AACAUUC  | 1608 | 3 UTR | 0.0213 | 1 |
| <u>STAC3</u>      | <u>NM_145064</u> | 7 | 1614 | AACAUUC  | 1608 | 3 UTR | 0.0213 | 1 |
| <u>STAMBPL1</u>   | <u>NM_020799</u> | 7 | 1748 | ACAUUCA  | 1742 | 3 UTR | 0.0167 | 2 |
| <u>STAMBPL1</u>   | <u>NM_020799</u> | 7 | 1748 | ACAUUCA  | 1742 | 3 UTR | 0.0167 | 2 |
| <u>STAT5A</u>     | <u>NM_003152</u> | 8 | 3032 | AACAUUCA | 3025 | 3 UTR | 0.0192 | 1 |
| <u>STAT5A</u>     | <u>NM_003152</u> | 8 | 3032 | AACAUUCA | 3025 | 3 UTR | 0.0192 | 1 |
| <u>STCH</u>       | <u>NM_006948</u> | 8 | 3008 | AACAUUCA | 3001 | 3 UTR | 0.0377 | 1 |
| <u>STCH</u>       | <u>NM_006948</u> | 8 | 3008 | AACAUUCA | 3001 | 3 UTR | 0.0377 | 1 |
| <u>STEAP4</u>     | <u>NM_024636</u> | 9 | 1563 | AACAUUCA | 1555 | 3 UTR | 0.0113 | 1 |
| <u>STEAP4</u>     | <u>NM_024636</u> | 8 | 1562 | ACAUUCA  | 1555 | 3 UTR | 0.0443 | 2 |
| <u>STEAP4</u>     | <u>NM_024636</u> | 9 | 1563 | AACAUUCA | 1555 | 3 UTR | 0.0113 | 1 |
| <u>STEAP4</u>     | <u>NM_024636</u> | 8 | 1562 | ACAUUCA  | 1555 | 3 UTR | 0.0443 | 2 |
| <u>STK17B</u>     | <u>NM_004226</u> | 7 | 1738 | AACAUUC  | 1732 | 3 UTR | 0.0196 | 1 |
| <u>STK17B</u>     | <u>NM_004226</u> | 7 | 1738 | AACAUUC  | 1732 | 3 UTR | 0.0196 | 1 |
| <u>STK25</u>      | <u>NM_006374</u> | 7 | 2023 | AACAUUC  | 2017 | 3 UTR | 0.0419 | 1 |
| <u>STK25</u>      | <u>NM_006374</u> | 7 | 2023 | AACAUUC  | 2017 | 3 UTR | 0.0419 | 1 |
| <u>STK32C</u>     | <u>NM_173575</u> | 8 | 2048 | AACAUUCA | 2041 | 3 UTR | 0.0082 | 1 |

|               |                     |    |       |            |       |       |        |   |
|---------------|---------------------|----|-------|------------|-------|-------|--------|---|
| <u>STK32C</u> | <u>NM_173575</u>    | 7  | 2047  | ACAUUCA    | 2041  | 3 UTR | 0.0324 | 2 |
| <u>STK32C</u> | <u>NM_173575</u>    | 8  | 2048  | AACAUUCA   | 2041  | 3 UTR | 0.0082 | 1 |
| <u>STK32C</u> | <u>NM_173575</u>    | 7  | 2047  | ACAUUCA    | 2041  | 3 UTR | 0.0324 | 2 |
| <u>STX12</u>  | <u>NM_177424</u>    | 8  | 1843  | AACAUUCA   | 1836  | 3 UTR | 0.0322 | 1 |
| <u>STX12</u>  | <u>NM_177424</u>    | 8  | 1843  | AACAUUCA   | 1836  | 3 UTR | 0.0322 | 1 |
| <u>STXBP4</u> | <u>NM_178509</u>    | 9  | 3311  | AACAUUCA   | 3303  | 3 UTR | 0.0158 | 1 |
| <u>STXBP4</u> | <u>NM_178509</u>    | 9  | 3311  | AACAUUCA   | 3303  | 3 UTR | 0.0158 | 1 |
| <u>SUCLG2</u> | <u>NM_003848</u>    | 8  | 2230  | ACAUCUCAA  | 2223  | 3 UTR | 0.0158 | 2 |
| <u>SUCLG2</u> | <u>NM_003848</u>    | 8  | 2230  | ACAUCUCAA  | 2223  | 3 UTR | 0.0158 | 2 |
| <u>SUMO3</u>  | <u>NM_006936</u>    | 8  | 792   | AACAUUCA   | 785   | 3 UTR | 0.0205 | 1 |
| <u>SUMO3</u>  | <u>NM_006936</u>    | 8  | 792   | AACAUUCA   | 785   | 3 UTR | 0.0205 | 1 |
| <u>SUSD5</u>  | <u>NM_015551</u>    | 8  | 4926  | AACAUUCA   | 4919  | 3 UTR | 0.0403 | 1 |
| <u>SUSD5</u>  | <u>NM_015551</u>    | 8  | 4926  | AACAUUCA   | 4919  | 3 UTR | 0.0403 | 1 |
| <u>SYN2</u>   | <u>NM_003178</u>    | 8  | 3247  | AACAUUCA   | 3240  | 3 UTR | 0.0343 | 1 |
| <u>SYN2</u>   | <u>NM_003178</u>    | 8  | 3247  | AACAUUCA   | 3240  | 3 UTR | 0.0343 | 1 |
| <u>SYNE1</u>  | <u>NM_182961</u>    | 10 | 27647 | AACAUUCAAC | 27638 | 3 UTR | 0.0007 | 1 |
| <u>SYNE1</u>  | <u>NM_182961</u>    | 9  | 27646 | ACAUCUCAA  | 27638 | 3 UTR | 0.0029 | 2 |
| <u>SYNE1</u>  | <u>NM_182961</u>    | 10 | 27647 | AACAUUCAAC | 27638 | 3 UTR | 0.0007 | 1 |
| <u>SYNE1</u>  | <u>NM_182961</u>    | 9  | 27646 | ACAUCUCAA  | 27638 | 3 UTR | 0.0029 | 2 |
| <u>SYNPR</u>  | <u>NM_144642</u>    | 8  | 1276  | ACAUCUCAA  | 1269  | 3 UTR | 0.0221 | 2 |
| <u>SYNPR</u>  | <u>NM_144642</u>    | 8  | 1276  | ACAUCUCAA  | 1269  | 3 UTR | 0.0221 | 2 |
| <u>SYT15</u>  | <u>NM_031912</u>    | 9  | 4685  | ACAUCUCAA  | 4677  | 3 UTR | 0.0130 | 2 |
| <u>SYT15</u>  | <u>NM_031912</u>    | 9  | 4685  | ACAUCUCAA  | 4677  | 3 UTR | 0.0130 | 2 |
| <u>SYT16</u>  | <u>NM_031914</u>    | 8  | 3032  | ACAUCUCAA  | 3025  | 3 UTR | 0.0152 | 2 |
| <u>SYT16</u>  | <u>NM_031914</u>    | 8  | 3032  | ACAUCUCAA  | 3025  | 3 UTR | 0.0152 | 2 |
| <u>TACC2</u>  | <u>NM_206862</u>    | 7  | 9223  | AACAUUC    | 9217  | 3 UTR | 0.0300 | 1 |
| <u>TACC2</u>  | <u>NM_206862</u>    | 7  | 9223  | AACAUUC    | 9217  | 3 UTR | 0.0300 | 1 |
| <u>TADA1L</u> | <u>NM_053053</u>    | 9  | 1252  | AACAUUCA   | 1244  | 3 UTR | 0.0041 | 1 |
| <u>TADA1L</u> | <u>NM_053053</u>    | 8  | 1251  | ACAUCUCAA  | 1244  | 3 UTR | 0.0164 | 2 |
| <u>TADA1L</u> | <u>NM_053053</u>    | 9  | 1252  | AACAUUCA   | 1244  | 3 UTR | 0.0041 | 1 |
| <u>TADA1L</u> | <u>NM_053053</u>    | 8  | 1251  | ACAUCUCAA  | 1244  | 3 UTR | 0.0164 | 2 |
| <u>TAF15</u>  | <u>NM_003487</u>    | 9  | 1873  | AACAUUCA   | 1865  | 3 UTR | 0.0012 | 1 |
| <u>TAF15</u>  | <u>NM_003487</u>    | 8  | 1872  | ACAUCUCAA  | 1865  | 3 UTR | 0.0047 | 2 |
| <u>TAF15</u>  | <u>NM_003487</u>    | 9  | 1873  | AACAUUCA   | 1865  | 3 UTR | 0.0012 | 1 |
| <u>TAF15</u>  | <u>NM_003487</u>    | 8  | 1872  | ACAUCUCAA  | 1865  | 3 UTR | 0.0047 | 2 |
| <u>TAF1A</u>  | <u>NM_005681</u>    | 8  | 1610  | ACAUCUCAA  | 1603  | 3 UTR | 0.0053 | 2 |
| <u>TAF1A</u>  | <u>NM_005681</u>    | 8  | 1610  | ACAUCUCAA  | 1603  | 3 UTR | 0.0053 | 2 |
| <u>TAF9</u>   | <u>NM_001015892</u> | 7  | 1280  | ACAUUCA    | 1274  | 3 UTR | 0.0133 | 2 |

|                |                     |   |      |           |      |       |        |   |
|----------------|---------------------|---|------|-----------|------|-------|--------|---|
| <u>TAF9</u>    | <u>NM_001015892</u> | 7 | 1280 | ACAUUCA   | 1274 | 3 UTR | 0.0133 | 2 |
| <u>TAF9B</u>   | <u>NM_015975</u>    | 9 | 2435 | AACAUUCA  | 2427 | 3 UTR | 0.0072 | 1 |
| <u>TAF9B</u>   | <u>NM_015975</u>    | 8 | 2434 | ACAUUCA   | 2427 | 3 UTR | 0.0284 | 2 |
| <u>TAF9B</u>   | <u>NM_015975</u>    | 9 | 2435 | AACAUUCA  | 2427 | 3 UTR | 0.0072 | 1 |
| <u>TAF9B</u>   | <u>NM_015975</u>    | 8 | 2434 | ACAUUCA   | 2427 | 3 UTR | 0.0284 | 2 |
| <u>TAGLN3</u>  | <u>NM_013259</u>    | 7 | 1190 | AACAUUC   | 1184 | 3 UTR | 0.0212 | 1 |
| <u>TAGLN3</u>  | <u>NM_013259</u>    | 7 | 1190 | AACAUUC   | 1184 | 3 UTR | 0.0212 | 1 |
| <u>TAPT1</u>   | <u>NM_153365</u>    | 8 | 4046 | ACAUUCA   | 4039 | 3 UTR | 0.0422 | 2 |
| <u>TAPT1</u>   | <u>NM_153365</u>    | 8 | 4046 | ACAUUCA   | 4039 | 3 UTR | 0.0422 | 2 |
| <u>TBC1D1</u>  | <u>NM_015173</u>    | 9 | 5584 | AACAUUCA  | 5576 | 3 UTR | 0.0070 | 1 |
| <u>TBC1D1</u>  | <u>NM_015173</u>    | 9 | 4522 | AACAUUCA  | 4514 | 3 UTR | 0.0070 | 1 |
| <u>TBC1D1</u>  | <u>NM_015173</u>    | 8 | 5583 | ACAUUCA   | 5576 | 3 UTR | 0.0277 | 2 |
| <u>TBC1D1</u>  | <u>NM_015173</u>    | 8 | 4521 | ACAUUCA   | 4514 | 3 UTR | 0.0277 | 2 |
| <u>TBC1D1</u>  | <u>NM_015173</u>    | 9 | 5584 | AACAUUCA  | 5576 | 3 UTR | 0.0070 | 1 |
| <u>TBC1D1</u>  | <u>NM_015173</u>    | 9 | 4522 | AACAUUCA  | 4514 | 3 UTR | 0.0070 | 1 |
| <u>TBC1D1</u>  | <u>NM_015173</u>    | 8 | 5583 | ACAUUCA   | 5576 | 3 UTR | 0.0277 | 2 |
| <u>TBC1D1</u>  | <u>NM_015173</u>    | 8 | 4521 | ACAUUCA   | 4514 | 3 UTR | 0.0277 | 2 |
| <u>TBC1D14</u> | <u>NM_020773</u>    | 9 | 4106 | ACAUUCAAC | 4098 | 3 UTR | 0.0103 | 2 |
| <u>TBC1D14</u> | <u>NM_020773</u>    | 9 | 4106 | ACAUUCAAC | 4098 | 3 UTR | 0.0103 | 2 |
| <u>TBC1D15</u> | <u>NM_022771</u>    | 8 | 5637 | AACAUUCA  | 5630 | 3 UTR | 0.0171 | 1 |
| <u>TBC1D15</u> | <u>NM_022771</u>    | 8 | 5637 | AACAUUCA  | 5630 | 3 UTR | 0.0171 | 1 |
| <u>TBC1D9</u>  | <u>NM_015130</u>    | 8 | 5108 | AACAUUCA  | 5101 | 3 UTR | 0.0216 | 1 |
| <u>TBC1D9</u>  | <u>NM_015130</u>    | 8 | 5108 | AACAUUCA  | 5101 | 3 UTR | 0.0216 | 1 |
| <u>TBCD</u>    | <u>NM_005993</u>    | 8 | 4149 | AACAUUCA  | 4142 | 3 UTR | 0.0112 | 1 |
| <u>TBCD</u>    | <u>NM_005993</u>    | 7 | 4148 | ACAUUCA   | 4142 | 3 UTR | 0.0442 | 2 |
| <u>TBCD</u>    | <u>NM_005993</u>    | 8 | 4149 | AACAUUCA  | 4142 | 3 UTR | 0.0112 | 1 |
| <u>TBCD</u>    | <u>NM_005993</u>    | 7 | 4148 | ACAUUCA   | 4142 | 3 UTR | 0.0442 | 2 |
| <u>TBPL1</u>   | <u>NM_004865</u>    | 8 | 1294 | ACAUUCA   | 1287 | 3 UTR | 0.0072 | 2 |
| <u>TBPL1</u>   | <u>NM_004865</u>    | 8 | 1294 | ACAUUCA   | 1287 | 3 UTR | 0.0072 | 2 |
| <u>TBXA2R</u>  | <u>NM_001060</u>    | 8 | 2102 | ACAUUCA   | 2095 | 3 UTR | 0.0181 | 2 |
| <u>TBXA2R</u>  | <u>NM_001060</u>    | 8 | 2102 | ACAUUCA   | 2095 | 3 UTR | 0.0181 | 2 |
| <u>TCERG1</u>  | <u>NM_006706</u>    | 9 | 4159 | AACAUUCA  | 4151 | 3 UTR | 0.0034 | 1 |
| <u>TCERG1</u>  | <u>NM_006706</u>    | 9 | 4117 | AACAUUCA  | 4109 | 3 UTR | 0.0034 | 1 |
| <u>TCERG1</u>  | <u>NM_006706</u>    | 8 | 4158 | ACAUUCA   | 4151 | 3 UTR | 0.0136 | 2 |
| <u>TCERG1</u>  | <u>NM_006706</u>    | 8 | 4116 | ACAUUCA   | 4109 | 3 UTR | 0.0136 | 2 |
| <u>TCERG1</u>  | <u>NM_006706</u>    | 9 | 4159 | AACAUUCA  | 4151 | 3 UTR | 0.0034 | 1 |
| <u>TCERG1</u>  | <u>NM_006706</u>    | 9 | 4117 | AACAUUCA  | 4109 | 3 UTR | 0.0034 | 1 |
| <u>TCERG1</u>  | <u>NM_006706</u>    | 8 | 4158 | ACAUUCA   | 4151 | 3 UTR | 0.0136 | 2 |

|                 |                     |    |      |            |      |       |        |   |
|-----------------|---------------------|----|------|------------|------|-------|--------|---|
| <u>TCERG1</u>   | <u>NM_006706</u>    | 8  | 4116 | ACAUUCAA   | 4109 | 3 UTR | 0.0136 | 2 |
| <u>TCF7L2</u>   | <u>NM_030756</u>    | 9  | 3843 | AACAUUCA   | 3835 | 3 UTR | 0.0013 | 1 |
| <u>TCF7L2</u>   | <u>NM_030756</u>    | 8  | 3842 | ACAUUCAA   | 3835 | 3 UTR | 0.0054 | 2 |
| <u>TCF7L2</u>   | <u>NM_030756</u>    | 9  | 3843 | AACAUUCA   | 3835 | 3 UTR | 0.0013 | 1 |
| <u>TCF7L2</u>   | <u>NM_030756</u>    | 8  | 3842 | ACAUUCAA   | 3835 | 3 UTR | 0.0054 | 2 |
| <u>TCTN3</u>    | <u>NM_015631</u>    | 8  | 2376 | AACAUUCA   | 2369 | 3 UTR | 0.0102 | 1 |
| <u>TCTN3</u>    | <u>NM_015631</u>    | 7  | 2375 | ACAUUCA    | 2369 | 3 UTR | 0.0403 | 2 |
| <u>TCTN3</u>    | <u>NM_015631</u>    | 8  | 2376 | AACAUUCA   | 2369 | 3 UTR | 0.0102 | 1 |
| <u>TCTN3</u>    | <u>NM_015631</u>    | 7  | 2375 | ACAUUCA    | 2369 | 3 UTR | 0.0403 | 2 |
| <u>TDRD3</u>    | <u>NM_030794</u>    | 8  | 2475 | AACAUUCA   | 2468 | 3 UTR | 0.0044 | 1 |
| <u>TDRD3</u>    | <u>NM_030794</u>    | 8  | 2475 | AACAUUCA   | 2468 | 3 UTR | 0.0044 | 1 |
| <u>TEX2</u>     | <u>NM_018469</u>    | 9  | 4268 | AACAUUCA   | 4260 | 3 UTR | 0.0059 | 1 |
| <u>TEX2</u>     | <u>NM_018469</u>    | 8  | 4267 | ACAUUCAA   | 4260 | 3 UTR | 0.0234 | 2 |
| <u>TEX2</u>     | <u>NM_018469</u>    | 9  | 4268 | AACAUUCA   | 4260 | 3 UTR | 0.0059 | 1 |
| <u>TEX2</u>     | <u>NM_018469</u>    | 8  | 4267 | ACAUUCAA   | 4260 | 3 UTR | 0.0234 | 2 |
| <u>TFPI</u>     | <u>NM_006287</u>    | 8  | 3145 | AACAUUCA   | 3138 | 3 UTR | 0.0406 | 1 |
| <u>TFPI</u>     | <u>NM_006287</u>    | 8  | 3145 | AACAUUCA   | 3138 | 3 UTR | 0.0406 | 1 |
| <u>TFRC</u>     | <u>NM_003234</u>    | 9  | 5106 | AACAUUCA   | 5098 | 3 UTR | 0.0102 | 1 |
| <u>TFRC</u>     | <u>NM_003234</u>    | 8  | 5105 | ACAUUCAA   | 5098 | 3 UTR | 0.0400 | 2 |
| <u>TFRC</u>     | <u>NM_003234</u>    | 8  | 4662 | ACAUUCAA   | 4655 | 3 UTR | 0.0400 | 2 |
| <u>TFRC</u>     | <u>NM_003234</u>    | 9  | 5106 | AACAUUCA   | 5098 | 3 UTR | 0.0102 | 1 |
| <u>TFRC</u>     | <u>NM_003234</u>    | 8  | 5105 | ACAUUCAA   | 5098 | 3 UTR | 0.0400 | 2 |
| <u>TFRC</u>     | <u>NM_003234</u>    | 8  | 4662 | ACAUUCAA   | 4655 | 3 UTR | 0.0400 | 2 |
| <u>TGFBI</u>    | <u>NM_000358</u>    | 9  | 2294 | AACAUUCA   | 2286 | 3 UTR | 0.0023 | 1 |
| <u>TGFBI</u>    | <u>NM_000358</u>    | 8  | 2293 | ACAUUCAA   | 2286 | 3 UTR | 0.0090 | 2 |
| <u>TGFBI</u>    | <u>NM_000358</u>    | 9  | 2294 | AACAUUCA   | 2286 | 3 UTR | 0.0023 | 1 |
| <u>TGFBI</u>    | <u>NM_000358</u>    | 8  | 2293 | ACAUUCAA   | 2286 | 3 UTR | 0.0090 | 2 |
| <u>TGFBR2</u>   | <u>NM_001024847</u> | 9  | 2956 | AACAUUCA   | 2948 | 3 UTR | 0.0097 | 1 |
| <u>TGFBR2</u>   | <u>NM_001024847</u> | 8  | 3859 | ACAUUCAA   | 3852 | 3 UTR | 0.0381 | 2 |
| <u>TGFBR2</u>   | <u>NM_001024847</u> | 8  | 2955 | ACAUUCAA   | 2948 | 3 UTR | 0.0381 | 2 |
| <u>TGFBR2</u>   | <u>NM_001024847</u> | 9  | 2956 | AACAUUCA   | 2948 | 3 UTR | 0.0097 | 1 |
| <u>TGFBR2</u>   | <u>NM_001024847</u> | 8  | 3859 | ACAUUCAA   | 3852 | 3 UTR | 0.0381 | 2 |
| <u>TGFBR2</u>   | <u>NM_001024847</u> | 8  | 2955 | ACAUUCAA   | 2948 | 3 UTR | 0.0381 | 2 |
| <u>TGFBRAP1</u> | <u>NM_004257</u>    | 7  | 2874 | ACAUUCA    | 2868 | 3 UTR | 0.0189 | 2 |
| <u>TGFBRAP1</u> | <u>NM_004257</u>    | 7  | 2846 | ACAUUCA    | 2840 | 3 UTR | 0.0189 | 2 |
| <u>TGFBRAP1</u> | <u>NM_004257</u>    | 7  | 2874 | ACAUUCA    | 2868 | 3 UTR | 0.0189 | 2 |
| <u>TGFBRAP1</u> | <u>NM_004257</u>    | 7  | 2846 | ACAUUCA    | 2840 | 3 UTR | 0.0189 | 2 |
| <u>TGIF2</u>    | <u>NM_021809</u>    | 10 | 1364 | AACAUUCAAC | 1355 | 3 UTR | 0.0024 | 1 |

|                 |                     |    |      |            |      |       |        |   |
|-----------------|---------------------|----|------|------------|------|-------|--------|---|
| <u>TGIF2</u>    | <u>NM_021809</u>    | 9  | 1363 | ACAUUCAAC  | 1355 | 3 UTR | 0.0096 | 2 |
| <u>TGIF2</u>    | <u>NM_021809</u>    | 10 | 1364 | AACAUUCAAC | 1355 | 3 UTR | 0.0024 | 1 |
| <u>TGIF2</u>    | <u>NM_021809</u>    | 9  | 1363 | ACAUUCAAC  | 1355 | 3 UTR | 0.0096 | 2 |
| <u>THOC7</u>    | <u>NM_025075</u>    | 7  | 876  | ACAUUCA    | 870  | 3 UTR | 0.0171 | 2 |
| <u>THOC7</u>    | <u>NM_025075</u>    | 7  | 876  | ACAUUCA    | 870  | 3 UTR | 0.0171 | 2 |
| <u>THSD7B</u>   | <u>NM_001080427</u> | 8  | 5430 | AACAUUCA   | 5423 | 3 UTR | 0.0168 | 1 |
| <u>THSD7B</u>   | <u>NM_001080427</u> | 8  | 5430 | AACAUUCA   | 5423 | 3 UTR | 0.0168 | 1 |
| <u>TIA1</u>     | <u>NM_022173</u>    | 8  | 3861 | AACAUUCA   | 3854 | 3 UTR | 0.0487 | 1 |
| <u>TIA1</u>     | <u>NM_022173</u>    | 8  | 4588 | ACAUUCA    | 4581 | 3 UTR | 0.0487 | 2 |
| <u>TIA1</u>     | <u>NM_022173</u>    | 8  | 3861 | AACAUUCA   | 3854 | 3 UTR | 0.0487 | 1 |
| <u>TIA1</u>     | <u>NM_022173</u>    | 8  | 4588 | ACAUUCA    | 4581 | 3 UTR | 0.0487 | 2 |
| <u>TIFA</u>     | <u>NM_052864</u>    | 8  | 1820 | AACAUUCA   | 1813 | 3 UTR | 0.0338 | 1 |
| <u>TIFA</u>     | <u>NM_052864</u>    | 8  | 1695 | AACAUUCA   | 1688 | 3 UTR | 0.0338 | 1 |
| <u>TIFA</u>     | <u>NM_052864</u>    | 8  | 1820 | AACAUUCA   | 1813 | 3 UTR | 0.0338 | 1 |
| <u>TIFA</u>     | <u>NM_052864</u>    | 8  | 1695 | AACAUUCA   | 1688 | 3 UTR | 0.0338 | 1 |
| <u>TIMELESS</u> | <u>NM_003920</u>    | 7  | 4342 | ACAUUCA    | 4336 | 3 UTR | 0.0388 | 2 |
| <u>TIMELESS</u> | <u>NM_003920</u>    | 7  | 4342 | ACAUUCA    | 4336 | 3 UTR | 0.0388 | 2 |
| <u>TIMM17A</u>  | <u>NM_006335</u>    | 8  | 1347 | ACAUUCA    | 1340 | 3 UTR | 0.0170 | 2 |
| <u>TIMM17A</u>  | <u>NM_006335</u>    | 8  | 1347 | ACAUUCA    | 1340 | 3 UTR | 0.0170 | 2 |
| <u>TM2D3</u>    | <u>NM_078474</u>    | 7  | 1321 | AACAUUC    | 1315 | 3 UTR | 0.0387 | 1 |
| <u>TM2D3</u>    | <u>NM_078474</u>    | 7  | 1321 | AACAUUC    | 1315 | 3 UTR | 0.0387 | 1 |
| <u>TM7SF3</u>   | <u>NM_016551</u>    | 7  | 4178 | AACAUUC    | 4172 | 3 UTR | 0.0463 | 1 |
| <u>TM7SF3</u>   | <u>NM_016551</u>    | 7  | 3869 | AACAUUC    | 3863 | 3 UTR | 0.0463 | 1 |
| <u>TM7SF3</u>   | <u>NM_016551</u>    | 7  | 4178 | AACAUUC    | 4172 | 3 UTR | 0.0463 | 1 |
| <u>TM7SF3</u>   | <u>NM_016551</u>    | 7  | 3869 | AACAUUC    | 3863 | 3 UTR | 0.0463 | 1 |
| <u>TMCO3</u>    | <u>NM_017905</u>    | 8  | 2654 | ACAUUCA    | 2647 | 3 UTR | 0.0107 | 2 |
| <u>TMCO3</u>    | <u>NM_017905</u>    | 8  | 2654 | ACAUUCA    | 2647 | 3 UTR | 0.0107 | 2 |
| <u>TMEM106B</u> | <u>NM_018374</u>    | 10 | 2808 | ACAUUCAACG | 2799 | 3 UTR | 0.0050 | 2 |
| <u>TMEM106B</u> | <u>NM_018374</u>    | 10 | 2808 | ACAUUCAACG | 2799 | 3 UTR | 0.0050 | 2 |
| <u>TMEM108</u>  | <u>NM_023943</u>    | 8  | 2338 | AACAUUCA   | 2331 | 3 UTR | 0.0272 | 1 |
| <u>TMEM108</u>  | <u>NM_023943</u>    | 8  | 2338 | AACAUUCA   | 2331 | 3 UTR | 0.0272 | 1 |
| <u>TMEM123</u>  | <u>NM_052932</u>    | 8  | 3198 | ACAUUCA    | 3191 | 3 UTR | 0.0383 | 2 |
| <u>TMEM123</u>  | <u>NM_052932</u>    | 8  | 3198 | ACAUUCA    | 3191 | 3 UTR | 0.0383 | 2 |
| <u>TMEM127</u>  | <u>NM_017849</u>    | 8  | 2243 | ACAUUCA    | 2236 | 3 UTR | 0.0484 | 2 |
| <u>TMEM127</u>  | <u>NM_017849</u>    | 8  | 2243 | ACAUUCA    | 2236 | 3 UTR | 0.0484 | 2 |
| <u>TMEM131</u>  | <u>NM_015348</u>    | 8  | 6584 | ACAUUCA    | 6577 | 3 UTR | 0.0118 | 2 |
| <u>TMEM131</u>  | <u>NM_015348</u>    | 7  | 6449 | ACAUUCA    | 6443 | 3 UTR | 0.0463 | 2 |
| <u>TMEM131</u>  | <u>NM_015348</u>    | 8  | 6584 | ACAUUCA    | 6577 | 3 UTR | 0.0118 | 2 |

|                  |                     |    |      |            |      |       |        |   |
|------------------|---------------------|----|------|------------|------|-------|--------|---|
| <u>TMEM131</u>   | <u>NM_015348</u>    | 7  | 6449 | ACAUUCA    | 6443 | 3 UTR | 0.0463 | 2 |
| <u>TMEM144</u>   | <u>NM_018342</u>    | 8  | 2349 | ACAUUCA    | 2342 | 3 UTR | 0.0265 | 2 |
| <u>TMEM144</u>   | <u>NM_018342</u>    | 8  | 2349 | ACAUUCA    | 2342 | 3 UTR | 0.0265 | 2 |
| <u>TMEM14A</u>   | <u>NM_014051</u>    | 7  | 980  | ACAUUCA    | 974  | 3 UTR | 0.0324 | 2 |
| <u>TMEM14A</u>   | <u>NM_014051</u>    | 7  | 980  | ACAUUCA    | 974  | 3 UTR | 0.0324 | 2 |
| <u>TMEM165</u>   | <u>NM_018475</u>    | 7  | 1892 | ACAUUCA    | 1886 | 3 UTR | 0.0442 | 2 |
| <u>TMEM165</u>   | <u>NM_018475</u>    | 7  | 1892 | ACAUUCA    | 1886 | 3 UTR | 0.0442 | 2 |
| <u>TMEM173</u>   | <u>NM_198282</u>    | 7  | 1468 | ACAUUCA    | 1462 | 3 UTR | 0.0195 | 2 |
| <u>TMEM173</u>   | <u>NM_198282</u>    | 7  | 1468 | ACAUUCA    | 1462 | 3 UTR | 0.0195 | 2 |
| <u>TMEM206</u>   | <u>NM_018252</u>    | 7  | 1841 | AACAUUC    | 1835 | 3 UTR | 0.0452 | 1 |
| <u>TMEM206</u>   | <u>NM_018252</u>    | 7  | 1841 | AACAUUC    | 1835 | 3 UTR | 0.0452 | 1 |
| <u>TMEM22</u>    | <u>NM_025246</u>    | 7  | 1941 | ACAUUCA    | 1935 | 3 UTR | 0.0129 | 2 |
| <u>TMEM22</u>    | <u>NM_025246</u>    | 7  | 1941 | ACAUUCA    | 1935 | 3 UTR | 0.0129 | 2 |
| <u>TMEM27</u>    | <u>NM_020665</u>    | 8  | 1054 | ACAUUCA    | 1047 | 3 UTR | 0.0102 | 2 |
| <u>TMEM27</u>    | <u>NM_020665</u>    | 8  | 1054 | ACAUUCA    | 1047 | 3 UTR | 0.0102 | 2 |
| <u>TMEM30A</u>   | <u>NM_018247</u>    | 10 | 2054 | AACAUUCAAC | 2045 | 3 UTR | 0.0030 | 1 |
| <u>TMEM30A</u>   | <u>NM_018247</u>    | 9  | 2053 | ACAUUCAAC  | 2045 | 3 UTR | 0.0121 | 2 |
| <u>TMEM30A</u>   | <u>NM_018247</u>    | 10 | 2054 | AACAUUCAAC | 2045 | 3 UTR | 0.0030 | 1 |
| <u>TMEM30A</u>   | <u>NM_018247</u>    | 9  | 2053 | ACAUUCAAC  | 2045 | 3 UTR | 0.0121 | 2 |
| <u>TMEM33</u>    | <u>NM_018126</u>    | 8  | 1642 | ACAUUCA    | 1635 | 3 UTR | 0.0242 | 2 |
| <u>TMEM33</u>    | <u>NM_018126</u>    | 8  | 1642 | ACAUUCA    | 1635 | 3 UTR | 0.0242 | 2 |
| <u>TMEM40</u>    | <u>NM_018306</u>    | 8  | 983  | AACAUUCA   | 976  | 3 UTR | 0.0134 | 1 |
| <u>TMEM40</u>    | <u>NM_018306</u>    | 8  | 983  | AACAUUCA   | 976  | 3 UTR | 0.0134 | 1 |
| <u>TMEM41A</u>   | <u>NM_080652</u>    | 8  | 2106 | AACAUUCA   | 2099 | 3 UTR | 0.0293 | 1 |
| <u>TMEM41A</u>   | <u>NM_080652</u>    | 8  | 2106 | AACAUUCA   | 2099 | 3 UTR | 0.0293 | 1 |
| <u>TMEM45A</u>   | <u>NM_018004</u>    | 7  | 1550 | ACAUUCA    | 1544 | 3 UTR | 0.0255 | 2 |
| <u>TMEM45A</u>   | <u>NM_018004</u>    | 7  | 1550 | ACAUUCA    | 1544 | 3 UTR | 0.0255 | 2 |
| <u>TMEM64</u>    | <u>NM_001008495</u> | 9  | 1694 | ACAUUCAAC  | 1686 | 3 UTR | 0.0087 | 2 |
| <u>TMEM64</u>    | <u>NM_001008495</u> | 9  | 1694 | ACAUUCAAC  | 1686 | 3 UTR | 0.0087 | 2 |
| <u>TMEM86A</u>   | <u>NM_153347</u>    | 8  | 3151 | AACAUUCA   | 3144 | 3 UTR | 0.0418 | 1 |
| <u>TMEM86A</u>   | <u>NM_153347</u>    | 8  | 3151 | AACAUUCA   | 3144 | 3 UTR | 0.0418 | 1 |
| <u>TMEM92</u>    | <u>NM_153229</u>    | 8  | 999  | AACAUUCA   | 992  | 3 UTR | 0.0326 | 1 |
| <u>TMEM92</u>    | <u>NM_153229</u>    | 8  | 999  | AACAUUCA   | 992  | 3 UTR | 0.0326 | 1 |
| <u>TMPRSS11D</u> | <u>NM_004262</u>    | 8  | 1523 | AACAUUCA   | 1516 | 3 UTR | 0.0223 | 1 |
| <u>TMPRSS11D</u> | <u>NM_004262</u>    | 8  | 1523 | AACAUUCA   | 1516 | 3 UTR | 0.0223 | 1 |
| <u>TMTC1</u>     | <u>NM_175861</u>    | 9  | 5524 | ACAUUCAAC  | 5516 | 3 UTR | 0.0227 | 2 |
| <u>TMTC1</u>     | <u>NM_175861</u>    | 9  | 5524 | ACAUUCAAC  | 5516 | 3 UTR | 0.0227 | 2 |
| <u>TNF</u>       | <u>NM_000594</u>    | 7  | 1377 | ACAUUCA    | 1371 | 3 UTR | 0.0475 | 2 |

|                  |                     |   |      |           |      |       |        |   |
|------------------|---------------------|---|------|-----------|------|-------|--------|---|
| <u>TNF</u>       | <u>NM_000594</u>    | 7 | 1377 | ACAUUCA   | 1371 | 3 UTR | 0.0475 | 2 |
| <u>TNFAIP1</u>   | <u>NM_021137</u>    | 8 | 3010 | ACAUUCA   | 3003 | 3 UTR | 0.0361 | 2 |
| <u>TNFAIP1</u>   | <u>NM_021137</u>    | 8 | 3010 | ACAUUCA   | 3003 | 3 UTR | 0.0361 | 2 |
| <u>TNFAIP6</u>   | <u>NM_007115</u>    | 8 | 1339 | AACAUUCA  | 1332 | 3 UTR | 0.0081 | 1 |
| <u>TNFAIP6</u>   | <u>NM_007115</u>    | 7 | 1338 | ACAUUCA   | 1332 | 3 UTR | 0.0318 | 2 |
| <u>TNFAIP6</u>   | <u>NM_007115</u>    | 8 | 1339 | AACAUUCA  | 1332 | 3 UTR | 0.0081 | 1 |
| <u>TNFAIP6</u>   | <u>NM_007115</u>    | 7 | 1338 | ACAUUCA   | 1332 | 3 UTR | 0.0318 | 2 |
| <u>TNFRSF11B</u> | <u>NM_002546</u>    | 8 | 2274 | ACAUUCA   | 2267 | 3 UTR | 0.0125 | 2 |
| <u>TNFRSF11B</u> | <u>NM_002546</u>    | 8 | 2274 | ACAUUCA   | 2267 | 3 UTR | 0.0125 | 2 |
| <u>TNFSF15</u>   | <u>NM_005118</u>    | 8 | 1411 | AACAUUCA  | 1404 | 3 UTR | 0.0172 | 1 |
| <u>TNFSF15</u>   | <u>NM_005118</u>    | 8 | 1411 | AACAUUCA  | 1404 | 3 UTR | 0.0172 | 1 |
| <u>TNFSF4</u>    | <u>NM_003326</u>    | 9 | 3200 | ACAUUCAAC | 3192 | 3 UTR | 0.0106 | 2 |
| <u>TNFSF4</u>    | <u>NM_003326</u>    | 9 | 3200 | ACAUUCAAC | 3192 | 3 UTR | 0.0106 | 2 |
| <u>TNK1</u>      | <u>NM_003985</u>    | 7 | 2826 | ACAUUCA   | 2820 | 3 UTR | 0.0412 | 2 |
| <u>TNK1</u>      | <u>NM_003985</u>    | 7 | 2826 | ACAUUCA   | 2820 | 3 UTR | 0.0412 | 2 |
| <u>TNKS</u>      | <u>NM_003747</u>    | 9 | 5762 | AACAUUCA  | 5754 | 3 UTR | 0.0212 | 1 |
| <u>TNKS</u>      | <u>NM_003747</u>    | 9 | 5762 | AACAUUCA  | 5754 | 3 UTR | 0.0212 | 1 |
| <u>TNPO1</u>     | <u>NM_002270</u>    | 9 | 5788 | AACAUUCA  | 5780 | 3 UTR | 0.0216 | 1 |
| <u>TNPO1</u>     | <u>NM_002270</u>    | 9 | 5788 | AACAUUCA  | 5780 | 3 UTR | 0.0216 | 1 |
| <u>TNS3</u>      | <u>NM_022748</u>    | 8 | 7544 | AACAUUCA  | 7537 | 3 UTR | 0.0446 | 1 |
| <u>TNS3</u>      | <u>NM_022748</u>    | 8 | 7544 | AACAUUCA  | 7537 | 3 UTR | 0.0446 | 1 |
| <u>TOM1L1</u>    | <u>NM_005486</u>    | 9 | 2061 | ACAUUCAAC | 2053 | 3 UTR | 0.0029 | 2 |
| <u>TOM1L1</u>    | <u>NM_005486</u>    | 7 | 2012 | ACAUUCA   | 2006 | 3 UTR | 0.0447 | 2 |
| <u>TOM1L1</u>    | <u>NM_005486</u>    | 9 | 2061 | ACAUUCAAC | 2053 | 3 UTR | 0.0029 | 2 |
| <u>TOM1L1</u>    | <u>NM_005486</u>    | 7 | 2012 | ACAUUCA   | 2006 | 3 UTR | 0.0447 | 2 |
| <u>TOM1L2</u>    | <u>NM_001082968</u> | 9 | 5600 | ACAUUCAAC | 5592 | 3 UTR | 0.0157 | 2 |
| <u>TOM1L2</u>    | <u>NM_001082968</u> | 9 | 5600 | ACAUUCAAC | 5592 | 3 UTR | 0.0157 | 2 |
| <u>TOPBP1</u>    | <u>NM_007027</u>    | 7 | 4761 | ACAUUCA   | 4755 | 3 UTR | 0.0405 | 2 |
| <u>TOPBP1</u>    | <u>NM_007027</u>    | 7 | 4761 | ACAUUCA   | 4755 | 3 UTR | 0.0405 | 2 |
| <u>TOR1A</u>     | <u>NM_000113</u>    | 8 | 1190 | AACAUUCA  | 1183 | 3 UTR | 0.0158 | 1 |
| <u>TOR1A</u>     | <u>NM_000113</u>    | 8 | 1190 | AACAUUCA  | 1183 | 3 UTR | 0.0158 | 1 |
| <u>TOX</u>       | <u>NM_014729</u>    | 8 | 2259 | AACAUUCA  | 2252 | 3 UTR | 0.0349 | 1 |
| <u>TOX</u>       | <u>NM_014729</u>    | 8 | 2259 | AACAUUCA  | 2252 | 3 UTR | 0.0349 | 1 |
| <u>TP63</u>      | <u>NM_003722</u>    | 9 | 4660 | AACAUUCA  | 4652 | 3 UTR | 0.0106 | 1 |
| <u>TP63</u>      | <u>NM_003722</u>    | 8 | 4659 | ACAUUCA   | 4652 | 3 UTR | 0.0418 | 2 |
| <u>TP63</u>      | <u>NM_003722</u>    | 9 | 4660 | AACAUUCA  | 4652 | 3 UTR | 0.0106 | 1 |
| <u>TP63</u>      | <u>NM_003722</u>    | 8 | 4659 | ACAUUCA   | 4652 | 3 UTR | 0.0418 | 2 |
| <u>TPP1</u>      | <u>NM_000391</u>    | 8 | 3073 | AACAUUCA  | 3066 | 3 UTR | 0.0269 | 1 |

|                |                     |   |      |          |      |       |        |   |
|----------------|---------------------|---|------|----------|------|-------|--------|---|
| <u>TPP1</u>    | <u>NM_000391</u>    | 8 | 3073 | AACAUUCA | 3066 | 3 UTR | 0.0269 | 1 |
| <u>TPX2</u>    | <u>NM_012112</u>    | 7 | 3164 | ACAUUCA  | 3158 | 3 UTR | 0.0443 | 2 |
| <u>TPX2</u>    | <u>NM_012112</u>    | 7 | 3164 | ACAUUCA  | 3158 | 3 UTR | 0.0443 | 2 |
| <u>TRADD</u>   | <u>NM_003789</u>    | 7 | 1440 | AACAUUC  | 1434 | 3 UTR | 0.0287 | 1 |
| <u>TRADD</u>   | <u>NM_003789</u>    | 7 | 1440 | AACAUUC  | 1434 | 3 UTR | 0.0287 | 1 |
| <u>TRAK1</u>   | <u>NM_001042646</u> | 8 | 4844 | ACAUUCA  | 4837 | 3 UTR | 0.0307 | 2 |
| <u>TRAK1</u>   | <u>NM_001042646</u> | 8 | 4844 | ACAUUCA  | 4837 | 3 UTR | 0.0307 | 2 |
| <u>TREML4</u>  | <u>NM_198153</u>    | 8 | 1998 | ACAUUCA  | 1991 | 3 UTR | 0.0209 | 2 |
| <u>TREML4</u>  | <u>NM_198153</u>    | 8 | 1998 | ACAUUCA  | 1991 | 3 UTR | 0.0209 | 2 |
| <u>TRIM23</u>  | <u>NM_001656</u>    | 8 | 2252 | AACAUUCA | 2245 | 3 UTR | 0.0316 | 1 |
| <u>TRIM23</u>  | <u>NM_001656</u>    | 8 | 2252 | AACAUUCA | 2245 | 3 UTR | 0.0316 | 1 |
| <u>TRIM3</u>   | <u>NM_006458</u>    | 7 | 2723 | ACAUUCA  | 2717 | 3 UTR | 0.0263 | 2 |
| <u>TRIM3</u>   | <u>NM_006458</u>    | 7 | 2723 | ACAUUCA  | 2717 | 3 UTR | 0.0263 | 2 |
| <u>TRIM35</u>  | <u>NM_171982</u>    | 8 | 2202 | AACAUUCA | 2195 | 3 UTR | 0.0398 | 1 |
| <u>TRIM35</u>  | <u>NM_171982</u>    | 8 | 2202 | AACAUUCA | 2195 | 3 UTR | 0.0398 | 1 |
| <u>TRIM44</u>  | <u>NM_017583</u>    | 8 | 3969 | AACAUUCA | 3962 | 3 UTR | 0.0447 | 1 |
| <u>TRIM44</u>  | <u>NM_017583</u>    | 8 | 3969 | AACAUUCA | 3962 | 3 UTR | 0.0447 | 1 |
| <u>TRIM61</u>  | <u>NM_001012414</u> | 7 | 1523 | AACAUUC  | 1517 | 3 UTR | 0.0222 | 1 |
| <u>TRIM61</u>  | <u>NM_001012414</u> | 7 | 1523 | AACAUUC  | 1517 | 3 UTR | 0.0222 | 1 |
| <u>TRPC1</u>   | <u>NM_003304</u>    | 8 | 3293 | AACAUUCA | 3286 | 3 UTR | 0.0250 | 1 |
| <u>TRPC1</u>   | <u>NM_003304</u>    | 8 | 3293 | AACAUUCA | 3286 | 3 UTR | 0.0250 | 1 |
| <u>TRPC6</u>   | <u>NM_004621</u>    | 8 | 4140 | ACAUUCA  | 4133 | 3 UTR | 0.0210 | 2 |
| <u>TRPC6</u>   | <u>NM_004621</u>    | 8 | 4140 | ACAUUCA  | 4133 | 3 UTR | 0.0210 | 2 |
| <u>TRSPAP1</u> | <u>NM_017846</u>    | 8 | 1090 | AACAUUCA | 1083 | 3 UTR | 0.0140 | 1 |
| <u>TRSPAP1</u> | <u>NM_017846</u>    | 8 | 1090 | AACAUUCA | 1083 | 3 UTR | 0.0140 | 1 |
| <u>TSC22D2</u> | <u>NM_014779</u>    | 8 | 3359 | ACAUUCA  | 3352 | 3 UTR | 0.0183 | 2 |
| <u>TSC22D2</u> | <u>NM_014779</u>    | 8 | 3359 | ACAUUCA  | 3352 | 3 UTR | 0.0183 | 2 |
| <u>TSG101</u>  | <u>NM_006292</u>    | 8 | 1505 | AACAUUCA | 1498 | 3 UTR | 0.0038 | 1 |
| <u>TSG101</u>  | <u>NM_006292</u>    | 7 | 1504 | ACAUUCA  | 1498 | 3 UTR | 0.0152 | 2 |
| <u>TSG101</u>  | <u>NM_006292</u>    | 8 | 1505 | AACAUUCA | 1498 | 3 UTR | 0.0038 | 1 |
| <u>TSG101</u>  | <u>NM_006292</u>    | 7 | 1504 | ACAUUCA  | 1498 | 3 UTR | 0.0152 | 2 |
| <u>TSGA14</u>  | <u>NM_018718</u>    | 8 | 3501 | AACAUUCA | 3494 | 3 UTR | 0.0353 | 1 |
| <u>TSGA14</u>  | <u>NM_018718</u>    | 8 | 3501 | AACAUUCA | 3494 | 3 UTR | 0.0353 | 1 |
| <u>TSPAN8</u>  | <u>NM_004616</u>    | 7 | 1094 | ACAUUCA  | 1088 | 3 UTR | 0.0161 | 2 |
| <u>TSPAN8</u>  | <u>NM_004616</u>    | 7 | 1094 | ACAUUCA  | 1088 | 3 UTR | 0.0161 | 2 |
| <u>TSPYL4</u>  | <u>NM_021648</u>    | 8 | 3858 | ACAUUCA  | 3851 | 3 UTR | 0.0420 | 2 |
| <u>TSPYL4</u>  | <u>NM_021648</u>    | 8 | 3858 | ACAUUCA  | 3851 | 3 UTR | 0.0420 | 2 |
| <u>TTC23</u>   | <u>NM_001040655</u> | 8 | 3436 | AACAUUCA | 3429 | 3 UTR | 0.0254 | 1 |



|                |                     |    |      |             |      |       |        |   |
|----------------|---------------------|----|------|-------------|------|-------|--------|---|
| <u>TTC23</u>   | <u>NM_001040655</u> | 8  | 3436 | AACAUUCA    | 3429 | 3 UTR | 0.0254 | 1 |
| <u>TTC30B</u>  | <u>NM_152517</u>    | 7  | 2257 | AACAUUC     | 2251 | 3 UTR | 0.0372 | 1 |
| <u>TTC30B</u>  | <u>NM_152517</u>    | 7  | 2257 | AACAUUC     | 2251 | 3 UTR | 0.0372 | 1 |
| <u>TTC5</u>    | <u>NM_138376</u>    | 7  | 1482 | AACAUUC     | 1476 | 3 UTR | 0.0290 | 1 |
| <u>TTC5</u>    | <u>NM_138376</u>    | 7  | 1482 | AACAUUC     | 1476 | 3 UTR | 0.0290 | 1 |
| <u>TTLL2</u>   | <u>NM_031949</u>    | 8  | 2145 | ACAUCUCAA   | 2138 | 3 UTR | 0.0153 | 2 |
| <u>TTLL2</u>   | <u>NM_031949</u>    | 8  | 2145 | ACAUCUCAA   | 2138 | 3 UTR | 0.0153 | 2 |
| <u>TTLL7</u>   | <u>NM_024686</u>    | 7  | 3335 | ACAUUCA     | 3329 | 3 UTR | 0.0353 | 2 |
| <u>TTLL7</u>   | <u>NM_024686</u>    | 7  | 3335 | ACAUUCA     | 3329 | 3 UTR | 0.0353 | 2 |
| <u>TUBAL3</u>  | <u>NM_024803</u>    | 7  | 1743 | AACAUUC     | 1737 | 3 UTR | 0.0263 | 1 |
| <u>TUBAL3</u>  | <u>NM_024803</u>    | 7  | 1743 | AACAUUC     | 1737 | 3 UTR | 0.0263 | 1 |
| <u>TUBB</u>    | <u>NM_178014</u>    | 9  | 1646 | ACAUCUCAAAC | 1638 | 3 UTR | 0.0040 | 2 |
| <u>TUBB</u>    | <u>NM_178014</u>    | 9  | 1646 | ACAUCUCAAAC | 1638 | 3 UTR | 0.0040 | 2 |
| <u>TUBE1</u>   | <u>NM_016262</u>    | 7  | 2230 | AACAUUC     | 2224 | 3 UTR | 0.0388 | 1 |
| <u>TUBE1</u>   | <u>NM_016262</u>    | 7  | 2230 | AACAUUC     | 2224 | 3 UTR | 0.0388 | 1 |
| <u>TUFM</u>    | <u>NM_003321</u>    | 7  | 1893 | AACAUUC     | 1887 | 3 UTR | 0.0349 | 1 |
| <u>TUFM</u>    | <u>NM_003321</u>    | 7  | 1969 | ACAUUCA     | 1963 | 3 UTR | 0.0349 | 2 |
| <u>TUFM</u>    | <u>NM_003321</u>    | 7  | 1893 | AACAUUC     | 1887 | 3 UTR | 0.0349 | 1 |
| <u>TUFM</u>    | <u>NM_003321</u>    | 7  | 1969 | ACAUUCA     | 1963 | 3 UTR | 0.0349 | 2 |
| <u>TUSC3</u>   | <u>NM_006765</u>    | 8  | 1350 | AACAUUCA    | 1343 | 3 UTR | 0.0054 | 1 |
| <u>TUSC3</u>   | <u>NM_006765</u>    | 7  | 1349 | ACAUUCA     | 1343 | 3 UTR | 0.0215 | 2 |
| <u>TUSC3</u>   | <u>NM_006765</u>    | 8  | 1350 | AACAUUCA    | 1343 | 3 UTR | 0.0054 | 1 |
| <u>TUSC3</u>   | <u>NM_006765</u>    | 7  | 1349 | ACAUUCA     | 1343 | 3 UTR | 0.0215 | 2 |
| <u>TWIST1</u>  | <u>NM_000474</u>    | 7  | 1286 | AACAUUC     | 1280 | 3 UTR | 0.0424 | 1 |
| <u>TWIST1</u>  | <u>NM_000474</u>    | 7  | 1286 | AACAUUC     | 1280 | 3 UTR | 0.0424 | 1 |
| <u>TWISTNB</u> | <u>NM_001002926</u> | 8  | 3457 | AACAUUCA    | 3450 | 3 UTR | 0.0426 | 1 |
| <u>TWISTNB</u> | <u>NM_001002926</u> | 8  | 3457 | AACAUUCA    | 3450 | 3 UTR | 0.0426 | 1 |
| <u>TXK</u>     | <u>NM_003328</u>    | 8  | 2184 | AACAUUCA    | 2177 | 3 UTR | 0.0188 | 1 |
| <u>TXK</u>     | <u>NM_003328</u>    | 8  | 2184 | AACAUUCA    | 2177 | 3 UTR | 0.0188 | 1 |
| <u>TXLNA</u>   | <u>NM_175852</u>    | 8  | 3111 | AACAUUCA    | 3104 | 3 UTR | 0.0467 | 1 |
| <u>TXLNA</u>   | <u>NM_175852</u>    | 8  | 3111 | AACAUUCA    | 3104 | 3 UTR | 0.0467 | 1 |
| <u>TXNDC10</u> | <u>NM_019022</u>    | 8  | 3812 | AACAUUCA    | 3805 | 3 UTR | 0.0486 | 1 |
| <u>TXNDC10</u> | <u>NM_019022</u>    | 8  | 3812 | AACAUUCA    | 3805 | 3 UTR | 0.0486 | 1 |
| <u>TXNDC12</u> | <u>NM_015913</u>    | 8  | 1051 | ACAUCUCAA   | 1044 | 3 UTR | 0.0124 | 2 |
| <u>TXNDC12</u> | <u>NM_015913</u>    | 7  | 807  | ACAUUCA     | 801  | 3 UTR | 0.0487 | 2 |
| <u>TXNDC12</u> | <u>NM_015913</u>    | 8  | 1051 | ACAUCUCAA   | 1044 | 3 UTR | 0.0124 | 2 |
| <u>TXNDC12</u> | <u>NM_015913</u>    | 7  | 807  | ACAUUCA     | 801  | 3 UTR | 0.0487 | 2 |
| <u>TXNDC15</u> | <u>NM_024715</u>    | 10 | 3266 | AACAUUCAAC  | 3257 | 3 UTR | 0.0019 | 1 |

|                |                     |    |       |            |       |       |        |   |
|----------------|---------------------|----|-------|------------|-------|-------|--------|---|
| <u>TXNDC15</u> | <u>NM_024715</u>    | 9  | 3265  | ACAUUCAAC  | 3257  | 3 UTR | 0.0074 | 2 |
| <u>TXNDC15</u> | <u>NM_024715</u>    | 10 | 3266  | AACAUUCAAC | 3257  | 3 UTR | 0.0019 | 1 |
| <u>TXNDC15</u> | <u>NM_024715</u>    | 9  | 3265  | ACAUUCAAC  | 3257  | 3 UTR | 0.0074 | 2 |
| <u>UBAC2</u>   | <u>NM_177967</u>    | 8  | 1699  | ACAUUCAAA  | 1692  | 3 UTR | 0.0165 | 2 |
| <u>UBAC2</u>   | <u>NM_177967</u>    | 8  | 1699  | ACAUUCAAA  | 1692  | 3 UTR | 0.0165 | 2 |
| <u>UBE2B</u>   | <u>NM_003337</u>    | 8  | 1475  | ACAUUCAAA  | 1468  | 3 UTR | 0.0264 | 2 |
| <u>UBE2B</u>   | <u>NM_003337</u>    | 8  | 1475  | ACAUUCAAA  | 1468  | 3 UTR | 0.0264 | 2 |
| <u>UBE2CBP</u> | <u>NM_198920</u>    | 8  | 1662  | AACAUUCA   | 1655  | 3 UTR | 0.0087 | 1 |
| <u>UBE2CBP</u> | <u>NM_198920</u>    | 7  | 1661  | ACAUUCA    | 1655  | 3 UTR | 0.0343 | 2 |
| <u>UBE2CBP</u> | <u>NM_198920</u>    | 8  | 1662  | AACAUUCA   | 1655  | 3 UTR | 0.0087 | 1 |
| <u>UBE2CBP</u> | <u>NM_198920</u>    | 7  | 1661  | ACAUUCA    | 1655  | 3 UTR | 0.0343 | 2 |
| <u>UBE2F</u>   | <u>NM_080678</u>    | 7  | 1121  | AACAUUC    | 1115  | 3 UTR | 0.0428 | 1 |
| <u>UBE2F</u>   | <u>NM_080678</u>    | 7  | 1121  | AACAUUC    | 1115  | 3 UTR | 0.0428 | 1 |
| <u>UBE2J1</u>  | <u>NM_016021</u>    | 9  | 2089  | AACAUUCAAA | 2081  | 3 UTR | 0.0117 | 1 |
| <u>UBE2J1</u>  | <u>NM_016021</u>    | 8  | 2088  | ACAUUCAAA  | 2081  | 3 UTR | 0.0458 | 2 |
| <u>UBE2J1</u>  | <u>NM_016021</u>    | 9  | 2089  | AACAUUCAAA | 2081  | 3 UTR | 0.0117 | 1 |
| <u>UBE2J1</u>  | <u>NM_016021</u>    | 8  | 2088  | ACAUUCAAA  | 2081  | 3 UTR | 0.0458 | 2 |
| <u>UBE2W</u>   | <u>NM_001001481</u> | 9  | 1557  | AACAUUCAAA | 1549  | 3 UTR | 0.0133 | 1 |
| <u>UBE2W</u>   | <u>NM_001001481</u> | 9  | 1557  | AACAUUCAAA | 1549  | 3 UTR | 0.0133 | 1 |
| <u>UBP1</u>    | <u>NM_014517</u>    | 8  | 3543  | ACAUUCAAA  | 3536  | 3 UTR | 0.0302 | 2 |
| <u>UBP1</u>    | <u>NM_014517</u>    | 8  | 3543  | ACAUUCAAA  | 3536  | 3 UTR | 0.0302 | 2 |
| <u>UBQLNL</u>  | <u>NM_145053</u>    | 7  | 1883  | AACAUUC    | 1877  | 3 UTR | 0.0381 | 1 |
| <u>UBQLNL</u>  | <u>NM_145053</u>    | 7  | 1883  | AACAUUC    | 1877  | 3 UTR | 0.0381 | 1 |
| <u>UBXD3</u>   | <u>NM_152376</u>    | 8  | 2488  | AACAUUCA   | 2481  | 3 UTR | 0.0309 | 1 |
| <u>UBXD3</u>   | <u>NM_152376</u>    | 8  | 2488  | AACAUUCA   | 2481  | 3 UTR | 0.0309 | 1 |
| <u>UBXD6</u>   | <u>NM_005671</u>    | 7  | 1223  | AACAUUC    | 1217  | 3 UTR | 0.0367 | 1 |
| <u>UBXD6</u>   | <u>NM_005671</u>    | 7  | 1223  | AACAUUC    | 1217  | 3 UTR | 0.0367 | 1 |
| <u>ULK1</u>    | <u>NM_003565</u>    | 10 | 5097  | AACAUUCAAC | 5088  | 3 UTR | 0.0017 | 1 |
| <u>ULK1</u>    | <u>NM_003565</u>    | 9  | 5096  | ACAUUCAAC  | 5088  | 3 UTR | 0.0069 | 2 |
| <u>ULK1</u>    | <u>NM_003565</u>    | 10 | 5097  | AACAUUCAAC | 5088  | 3 UTR | 0.0017 | 1 |
| <u>ULK1</u>    | <u>NM_003565</u>    | 9  | 5096  | ACAUUCAAC  | 5088  | 3 UTR | 0.0069 | 2 |
| <u>USH2A</u>   | <u>NM_206933</u>    | 8  | 18879 | ACAUUCAAA  | 18872 | 3 UTR | 0.0431 | 2 |
| <u>USH2A</u>   | <u>NM_206933</u>    | 8  | 18879 | ACAUUCAAA  | 18872 | 3 UTR | 0.0431 | 2 |
| <u>USO1</u>    | <u>NM_003715</u>    | 8  | 3429  | ACAUUCAAA  | 3422  | 3 UTR | 0.0142 | 2 |
| <u>USO1</u>    | <u>NM_003715</u>    | 8  | 3429  | ACAUUCAAA  | 3422  | 3 UTR | 0.0142 | 2 |
| <u>USP13</u>   | <u>NM_003940</u>    | 7  | 3274  | ACAUUCA    | 3268  | 3 UTR | 0.0032 | 2 |
| <u>USP13</u>   | <u>NM_003940</u>    | 7  | 3274  | ACAUUCA    | 3268  | 3 UTR | 0.0032 | 2 |
| <u>USP33</u>   | <u>NM_015017</u>    | 8  | 4051  | ACAUUCAAA  | 4044  | 3 UTR | 0.0204 | 2 |

|               |                  |   |       |          |       |       |        |   |
|---------------|------------------|---|-------|----------|-------|-------|--------|---|
| <u>USP33</u>  | <u>NM_015017</u> | 8 | 4051  | ACAUUCA  | 4044  | 3 UTR | 0.0204 | 2 |
| <u>USP9Y</u>  | <u>NM_004654</u> | 8 | 9900  | ACAUUCA  | 9893  | 3 UTR | 0.0217 | 2 |
| <u>USP9Y</u>  | <u>NM_004654</u> | 8 | 9900  | ACAUUCA  | 9893  | 3 UTR | 0.0217 | 2 |
| <u>UVRAG</u>  | <u>NM_003369</u> | 8 | 4442  | ACAUUCA  | 4435  | 3 UTR | 0.0422 | 2 |
| <u>UVRAG</u>  | <u>NM_003369</u> | 8 | 4442  | ACAUUCA  | 4435  | 3 UTR | 0.0422 | 2 |
| <u>VBP1</u>   | <u>NM_003372</u> | 9 | 742   | AACAUUCA | 734   | 3 UTR | 0.0038 | 1 |
| <u>VBP1</u>   | <u>NM_003372</u> | 8 | 741   | ACAUUCA  | 734   | 3 UTR | 0.0150 | 2 |
| <u>VBP1</u>   | <u>NM_003372</u> | 9 | 742   | AACAUUCA | 734   | 3 UTR | 0.0038 | 1 |
| <u>VBP1</u>   | <u>NM_003372</u> | 8 | 741   | ACAUUCA  | 734   | 3 UTR | 0.0150 | 2 |
| <u>VCAM1</u>  | <u>NM_001078</u> | 7 | 2451  | ACAUUCA  | 2445  | 3 UTR | 0.0464 | 2 |
| <u>VCAM1</u>  | <u>NM_001078</u> | 7 | 2451  | ACAUUCA  | 2445  | 3 UTR | 0.0464 | 2 |
| <u>VCAN</u>   | <u>NM_004385</u> | 9 | 11468 | AACAUUCA | 11460 | 3 UTR | 0.0059 | 1 |
| <u>VCAN</u>   | <u>NM_004385</u> | 8 | 11467 | ACAUUCA  | 11460 | 3 UTR | 0.0233 | 2 |
| <u>VCAN</u>   | <u>NM_004385</u> | 9 | 11468 | AACAUUCA | 11460 | 3 UTR | 0.0059 | 1 |
| <u>VCAN</u>   | <u>NM_004385</u> | 8 | 11467 | ACAUUCA  | 11460 | 3 UTR | 0.0233 | 2 |
| <u>VGLL3</u>  | <u>NM_016206</u> | 9 | 7741  | AACAUUCA | 7733  | 3 UTR | 0.0339 | 1 |
| <u>VGLL3</u>  | <u>NM_016206</u> | 9 | 7741  | AACAUUCA | 7733  | 3 UTR | 0.0339 | 1 |
| <u>VIP</u>    | <u>NM_003381</u> | 9 | 1128  | AACAUUCA | 1120  | 3 UTR | 0.0036 | 1 |
| <u>VIP</u>    | <u>NM_003381</u> | 8 | 841   | AACAUUCA | 834   | 3 UTR | 0.0141 | 1 |
| <u>VIP</u>    | <u>NM_003381</u> | 8 | 1127  | ACAUUCA  | 1120  | 3 UTR | 0.0141 | 2 |
| <u>VIP</u>    | <u>NM_003381</u> | 9 | 1128  | AACAUUCA | 1120  | 3 UTR | 0.0036 | 1 |
| <u>VIP</u>    | <u>NM_003381</u> | 8 | 841   | AACAUUCA | 834   | 3 UTR | 0.0141 | 1 |
| <u>VIP</u>    | <u>NM_003381</u> | 8 | 1127  | ACAUUCA  | 1120  | 3 UTR | 0.0141 | 2 |
| <u>VPS13B</u> | <u>NM_017890</u> | 8 | 14033 | AACAUUCA | 14026 | 3 UTR | 0.0290 | 1 |
| <u>VPS13B</u> | <u>NM_017890</u> | 8 | 14033 | AACAUUCA | 14026 | 3 UTR | 0.0290 | 1 |
| <u>VPS33B</u> | <u>NM_018668</u> | 8 | 2477  | ACAUUCA  | 2470  | 3 UTR | 0.0066 | 2 |
| <u>VPS33B</u> | <u>NM_018668</u> | 8 | 2477  | ACAUUCA  | 2470  | 3 UTR | 0.0066 | 2 |
| <u>VPS37A</u> | <u>NM_152415</u> | 7 | 3567  | ACAUUCA  | 3561  | 3 UTR | 0.0331 | 2 |
| <u>VPS37A</u> | <u>NM_152415</u> | 7 | 3567  | ACAUUCA  | 3561  | 3 UTR | 0.0331 | 2 |
| <u>VPS41</u>  | <u>NM_014396</u> | 8 | 4391  | ACAUUCA  | 4384  | 3 UTR | 0.0345 | 2 |
| <u>VPS41</u>  | <u>NM_014396</u> | 8 | 4391  | ACAUUCA  | 4384  | 3 UTR | 0.0345 | 2 |
| <u>VRK3</u>   | <u>NM_016440</u> | 7 | 1966  | ACAUUCA  | 1960  | 3 UTR | 0.0216 | 2 |
| <u>VRK3</u>   | <u>NM_016440</u> | 7 | 1966  | ACAUUCA  | 1960  | 3 UTR | 0.0216 | 2 |
| <u>WASF1</u>  | <u>NM_003931</u> | 9 | 3057  | AACAUUCA | 3049  | 3 UTR | 0.0027 | 1 |
| <u>WASF1</u>  | <u>NM_003931</u> | 8 | 3056  | ACAUUCA  | 3049  | 3 UTR | 0.0108 | 2 |
| <u>WASF1</u>  | <u>NM_003931</u> | 9 | 3057  | AACAUUCA | 3049  | 3 UTR | 0.0027 | 1 |
| <u>WASF1</u>  | <u>NM_003931</u> | 8 | 3056  | ACAUUCA  | 3049  | 3 UTR | 0.0108 | 2 |
| <u>WASL</u>   | <u>NM_003941</u> | 8 | 2326  | AACAUUCA | 2319  | 3 UTR | 0.0387 | 1 |

|               |                     |    |       |            |       |       |        |   |
|---------------|---------------------|----|-------|------------|-------|-------|--------|---|
| <u>WASL</u>   | <u>NM_003941</u>    | 8  | 2326  | AACAUUCA   | 2319  | 3 UTR | 0.0387 | 1 |
| <u>WDFY1</u>  | <u>NM_020830</u>    | 10 | 3049  | AACAUUCAAC | 3040  | 3 UTR | 0.0032 | 1 |
| <u>WDFY1</u>  | <u>NM_020830</u>    | 9  | 3048  | ACAUUCAAC  | 3040  | 3 UTR | 0.0126 | 2 |
| <u>WDFY1</u>  | <u>NM_020830</u>    | 10 | 3049  | AACAUUCAAC | 3040  | 3 UTR | 0.0032 | 1 |
| <u>WDFY1</u>  | <u>NM_020830</u>    | 9  | 3048  | ACAUUCAAC  | 3040  | 3 UTR | 0.0126 | 2 |
| <u>WDFY3</u>  | <u>NM_014991</u>    | 8  | 14183 | AACAUUCA   | 14176 | 3 UTR | 0.0497 | 1 |
| <u>WDFY3</u>  | <u>NM_014991</u>    | 8  | 14183 | AACAUUCA   | 14176 | 3 UTR | 0.0497 | 1 |
| <u>WDR21A</u> | <u>NM_015604</u>    | 8  | 1810  | AACAUUCA   | 1803  | 3 UTR | 0.0136 | 1 |
| <u>WDR21A</u> | <u>NM_015604</u>    | 8  | 2374  | ACAUUCA    | 2367  | 3 UTR | 0.0136 | 2 |
| <u>WDR21A</u> | <u>NM_015604</u>    | 8  | 1810  | AACAUUCA   | 1803  | 3 UTR | 0.0136 | 1 |
| <u>WDR21A</u> | <u>NM_015604</u>    | 8  | 2374  | ACAUUCA    | 2367  | 3 UTR | 0.0136 | 2 |
| <u>WDR21C</u> | <u>NM_152418</u>    | 8  | 1990  | ACAUUCA    | 1983  | 3 UTR | 0.0309 | 2 |
| <u>WDR21C</u> | <u>NM_152418</u>    | 8  | 1990  | ACAUUCA    | 1983  | 3 UTR | 0.0309 | 2 |
| <u>WDR23</u>  | <u>NM_025230</u>    | 9  | 2647  | AACAUUCA   | 2639  | 3 UTR | 0.0074 | 1 |
| <u>WDR23</u>  | <u>NM_025230</u>    | 8  | 2646  | ACAUUCA    | 2639  | 3 UTR | 0.0293 | 2 |
| <u>WDR23</u>  | <u>NM_025230</u>    | 9  | 2647  | AACAUUCA   | 2639  | 3 UTR | 0.0074 | 1 |
| <u>WDR23</u>  | <u>NM_025230</u>    | 8  | 2646  | ACAUUCA    | 2639  | 3 UTR | 0.0293 | 2 |
| <u>WDR40B</u> | <u>NM_178470</u>    | 8  | 2411  | ACAUUCA    | 2404  | 3 UTR | 0.0263 | 2 |
| <u>WDR40B</u> | <u>NM_178470</u>    | 8  | 2411  | ACAUUCA    | 2404  | 3 UTR | 0.0263 | 2 |
| <u>WDR45L</u> | <u>NM_019613</u>    | 8  | 1789  | AACAUUCA   | 1782  | 3 UTR | 0.0206 | 1 |
| <u>WDR45L</u> | <u>NM_019613</u>    | 8  | 1789  | AACAUUCA   | 1782  | 3 UTR | 0.0206 | 1 |
| <u>WDR66</u>  | <u>NM_144668</u>    | 7  | 3608  | AACAUUC    | 3602  | 3 UTR | 0.0107 | 1 |
| <u>WDR66</u>  | <u>NM_144668</u>    | 7  | 3608  | AACAUUC    | 3602  | 3 UTR | 0.0107 | 1 |
| <u>WDR7</u>   | <u>NM_015285</u>    | 8  | 7228  | AACAUUCA   | 7221  | 3 UTR | 0.0389 | 1 |
| <u>WDR7</u>   | <u>NM_015285</u>    | 8  | 7228  | AACAUUCA   | 7221  | 3 UTR | 0.0389 | 1 |
| <u>WDR79</u>  | <u>NM_018081</u>    | 8  | 1836  | ACAUUCA    | 1829  | 3 UTR | 0.0002 | 2 |
| <u>WDR79</u>  | <u>NM_018081</u>    | 8  | 1836  | ACAUUCA    | 1829  | 3 UTR | 0.0002 | 2 |
| <u>WDR82</u>  | <u>NM_025222</u>    | 8  | 1542  | ACAUUCA    | 1535  | 3 UTR | 0.0457 | 2 |
| <u>WDR82</u>  | <u>NM_025222</u>    | 8  | 1542  | ACAUUCA    | 1535  | 3 UTR | 0.0457 | 2 |
| <u>WFS1</u>   | <u>NM_006005</u>    | 7  | 3470  | ACAUUCA    | 3464  | 3 UTR | 0.0475 | 2 |
| <u>WFS1</u>   | <u>NM_006005</u>    | 7  | 3470  | ACAUUCA    | 3464  | 3 UTR | 0.0475 | 2 |
| <u>WHDC1</u>  | <u>NM_001080435</u> | 8  | 4020  | AACAUUCA   | 4013  | 3 UTR | 0.0200 | 1 |
| <u>WHDC1</u>  | <u>NM_001080435</u> | 8  | 4013  | ACAUUCA    | 4006  | 3 UTR | 0.0200 | 2 |
| <u>WHDC1</u>  | <u>NM_001080435</u> | 8  | 4020  | AACAUUCA   | 4013  | 3 UTR | 0.0200 | 1 |
| <u>WHDC1</u>  | <u>NM_001080435</u> | 8  | 4013  | ACAUUCA    | 4006  | 3 UTR | 0.0200 | 2 |
| <u>WIF1</u>   | <u>NM_007191</u>    | 10 | 1357  | AACAUUCAAC | 1348  | 3 UTR | 0.0007 | 1 |
| <u>WIF1</u>   | <u>NM_007191</u>    | 9  | 1356  | ACAUUCAAC  | 1348  | 3 UTR | 0.0028 | 2 |
| <u>WIF1</u>   | <u>NM_007191</u>    | 10 | 1357  | AACAUUCAAC | 1348  | 3 UTR | 0.0007 | 1 |

|               |                     |   |      |           |      |       |        |   |
|---------------|---------------------|---|------|-----------|------|-------|--------|---|
| <u>WIF1</u>   | <u>NM_007191</u>    | 9 | 1356 | ACAUUCAAC | 1348 | 3 UTR | 0.0028 | 2 |
| <u>WNT11</u>  | <u>NM_004626</u>    | 7 | 1559 | AACAUUC   | 1553 | 3 UTR | 0.0441 | 1 |
| <u>WNT11</u>  | <u>NM_004626</u>    | 7 | 1559 | AACAUUC   | 1553 | 3 UTR | 0.0441 | 1 |
| <u>WNT16</u>  | <u>NM_057168</u>    | 9 | 2750 | AACAUUCA  | 2742 | 3 UTR | 0.0068 | 1 |
| <u>WNT16</u>  | <u>NM_057168</u>    | 8 | 2749 | ACAUUC    | 2742 | 3 UTR | 0.0268 | 2 |
| <u>WNT16</u>  | <u>NM_057168</u>    | 9 | 2750 | AACAUUCA  | 2742 | 3 UTR | 0.0068 | 1 |
| <u>WNT16</u>  | <u>NM_057168</u>    | 8 | 2749 | ACAUUC    | 2742 | 3 UTR | 0.0268 | 2 |
| <u>WNT5B</u>  | <u>NM_032642</u>    | 8 | 1995 | AACAUUCA  | 1988 | 3 UTR | 0.0150 | 1 |
| <u>WNT5B</u>  | <u>NM_032642</u>    | 8 | 1995 | AACAUUCA  | 1988 | 3 UTR | 0.0150 | 1 |
| <u>WSB1</u>   | <u>NM_015626</u>    | 8 | 2405 | ACAUUC    | 2398 | 3 UTR | 0.0191 | 2 |
| <u>WSB1</u>   | <u>NM_015626</u>    | 8 | 2405 | ACAUUC    | 2398 | 3 UTR | 0.0191 | 2 |
| <u>WSCD1</u>  | <u>NM_015253</u>    | 9 | 5595 | ACAUUCAAC | 5587 | 3 UTR | 0.0143 | 2 |
| <u>WSCD1</u>  | <u>NM_015253</u>    | 9 | 5595 | ACAUUCAAC | 5587 | 3 UTR | 0.0143 | 2 |
| <u>WTAP</u>   | <u>NM_004906</u>    | 9 | 1646 | AACAUUCA  | 1638 | 3 UTR | 0.0028 | 1 |
| <u>WTAP</u>   | <u>NM_004906</u>    | 8 | 1645 | ACAUUC    | 1638 | 3 UTR | 0.0111 | 2 |
| <u>WTAP</u>   | <u>NM_004906</u>    | 9 | 1646 | AACAUUCA  | 1638 | 3 UTR | 0.0028 | 1 |
| <u>WTAP</u>   | <u>NM_004906</u>    | 8 | 1645 | ACAUUC    | 1638 | 3 UTR | 0.0111 | 2 |
| <u>XG</u>     | <u>NM_175569</u>    | 8 | 939  | ACAUUC    | 932  | 3 UTR | 0.0320 | 2 |
| <u>XG</u>     | <u>NM_175569</u>    | 8 | 939  | ACAUUC    | 932  | 3 UTR | 0.0320 | 2 |
| <u>XRRA1</u>  | <u>NM_182969</u>    | 9 | 3246 | ACAUUCAAC | 3238 | 3 UTR | 0.0088 | 2 |
| <u>XRRA1</u>  | <u>NM_182969</u>    | 9 | 3246 | ACAUUCAAC | 3238 | 3 UTR | 0.0088 | 2 |
| <u>YIPF4</u>  | <u>NM_032312</u>    | 8 | 1711 | ACAUUC    | 1704 | 3 UTR | 0.0148 | 2 |
| <u>YIPF4</u>  | <u>NM_032312</u>    | 8 | 1711 | ACAUUC    | 1704 | 3 UTR | 0.0148 | 2 |
| <u>YLPM1</u>  | <u>NM_019589</u>    | 8 | 8101 | ACAUUC    | 8094 | 3 UTR | 0.0239 | 2 |
| <u>YLPM1</u>  | <u>NM_019589</u>    | 8 | 8101 | ACAUUC    | 8094 | 3 UTR | 0.0239 | 2 |
| <u>YOD1</u>   | <u>NM_018566</u>    | 9 | 5189 | AACAUUCA  | 5181 | 3 UTR | 0.0195 | 1 |
| <u>YOD1</u>   | <u>NM_018566</u>    | 9 | 5189 | AACAUUCA  | 5181 | 3 UTR | 0.0195 | 1 |
| <u>YTHDC1</u> | <u>NM_001031732</u> | 9 | 3860 | AACAUUCA  | 3852 | 3 UTR | 0.0141 | 1 |
| <u>YTHDC1</u> | <u>NM_001031732</u> | 9 | 3860 | AACAUUCA  | 3852 | 3 UTR | 0.0141 | 1 |
| <u>YTHDC2</u> | <u>NM_022828</u>    | 8 | 6220 | ACAUUC    | 6213 | 3 UTR | 0.0275 | 2 |
| <u>YTHDC2</u> | <u>NM_022828</u>    | 8 | 6220 | ACAUUC    | 6213 | 3 UTR | 0.0275 | 2 |
| <u>YTHDF2</u> | <u>NM_016258</u>    | 8 | 2965 | AACAUUCA  | 2958 | 3 UTR | 0.0127 | 1 |
| <u>YTHDF2</u> | <u>NM_016258</u>    | 7 | 2964 | ACAUUC    | 2958 | 3 UTR | 0.0497 | 2 |
| <u>YTHDF2</u> | <u>NM_016258</u>    | 8 | 2965 | AACAUUCA  | 2958 | 3 UTR | 0.0127 | 1 |
| <u>YTHDF2</u> | <u>NM_016258</u>    | 7 | 2964 | ACAUUC    | 2958 | 3 UTR | 0.0497 | 2 |
| <u>ZADH1</u>  | <u>NM_152444</u>    | 8 | 2505 | AACAUUCA  | 2498 | 3 UTR | 0.0194 | 1 |
| <u>ZADH1</u>  | <u>NM_152444</u>    | 8 | 2505 | AACAUUCA  | 2498 | 3 UTR | 0.0194 | 1 |
| <u>ZADH2</u>  | <u>NM_175907</u>    | 8 | 2955 | AACAUUCA  | 2948 | 3 UTR | 0.0432 | 1 |

|                |                     |    |       |            |       |       |        |   |
|----------------|---------------------|----|-------|------------|-------|-------|--------|---|
| <u>ZADH2</u>   | <u>NM_175907</u>    | 8  | 2955  | AACAUUCA   | 2948  | 3 UTR | 0.0432 | 1 |
| <u>ZBP1</u>    | <u>NM_030776</u>    | 9  | 1832  | AACAUUCA   | 1824  | 3 UTR | 0.0029 | 1 |
| <u>ZBP1</u>    | <u>NM_030776</u>    | 8  | 1831  | ACAUUCA    | 1824  | 3 UTR | 0.0115 | 2 |
| <u>ZBP1</u>    | <u>NM_030776</u>    | 9  | 1832  | AACAUUCA   | 1824  | 3 UTR | 0.0029 | 1 |
| <u>ZBP1</u>    | <u>NM_030776</u>    | 8  | 1831  | ACAUUCA    | 1824  | 3 UTR | 0.0115 | 2 |
| <u>ZBTB2</u>   | <u>NM_020861</u>    | 8  | 2481  | ACAUUCA    | 2474  | 3 UTR | 0.0215 | 2 |
| <u>ZBTB2</u>   | <u>NM_020861</u>    | 8  | 2481  | ACAUUCA    | 2474  | 3 UTR | 0.0215 | 2 |
| <u>ZBTB33</u>  | <u>NM_006777</u>    | 8  | 2547  | AACAUUCA   | 2540  | 3 UTR | 0.0444 | 1 |
| <u>ZBTB33</u>  | <u>NM_006777</u>    | 8  | 2547  | AACAUUCA   | 2540  | 3 UTR | 0.0444 | 1 |
| <u>ZBTB4</u>   | <u>NM_020899</u>    | 8  | 5037  | AACAUUCA   | 5030  | 3 UTR | 0.0388 | 1 |
| <u>ZBTB4</u>   | <u>NM_020899</u>    | 8  | 5037  | AACAUUCA   | 5030  | 3 UTR | 0.0388 | 1 |
| <u>ZBTB43</u>  | <u>NM_014007</u>    | 9  | 5888  | AACAUUCA   | 5880  | 3 UTR | 0.0163 | 1 |
| <u>ZBTB43</u>  | <u>NM_014007</u>    | 9  | 5888  | AACAUUCA   | 5880  | 3 UTR | 0.0163 | 1 |
| <u>ZC3H11A</u> | <u>NM_014827</u>    | 8  | 4506  | AACAUUCA   | 4499  | 3 UTR | 0.0263 | 1 |
| <u>ZC3H11A</u> | <u>NM_014827</u>    | 8  | 4506  | AACAUUCA   | 4499  | 3 UTR | 0.0263 | 1 |
| <u>ZDHC3</u>   | <u>NM_016598</u>    | 9  | 10927 | AACAUUCA   | 10919 | 3 UTR | 0.0428 | 1 |
| <u>ZDHC3</u>   | <u>NM_016598</u>    | 9  | 10927 | AACAUUCA   | 10919 | 3 UTR | 0.0428 | 1 |
| <u>ZFH4</u>    | <u>NM_024721</u>    | 8  | 13169 | AACAUUCA   | 13162 | 3 UTR | 0.0407 | 1 |
| <u>ZFH4</u>    | <u>NM_024721</u>    | 8  | 13169 | AACAUUCA   | 13162 | 3 UTR | 0.0407 | 1 |
| <u>ZFP2</u>    | <u>NM_030613</u>    | 7  | 1903  | AACAUUC    | 1897  | 3 UTR | 0.0306 | 1 |
| <u>ZFP2</u>    | <u>NM_030613</u>    | 7  | 1903  | AACAUUC    | 1897  | 3 UTR | 0.0306 | 1 |
| <u>ZFP36L2</u> | <u>NM_006887</u>    | 8  | 3565  | ACAUUCA    | 3558  | 3 UTR | 0.0290 | 2 |
| <u>ZFP36L2</u> | <u>NM_006887</u>    | 8  | 3565  | ACAUUCA    | 3558  | 3 UTR | 0.0290 | 2 |
| <u>ZFR</u>     | <u>NM_016107</u>    | 8  | 3879  | AACAUUCA   | 3872  | 3 UTR | 0.0217 | 1 |
| <u>ZFR</u>     | <u>NM_016107</u>    | 8  | 3879  | AACAUUCA   | 3872  | 3 UTR | 0.0217 | 1 |
| <u>ZFX</u>     | <u>NM_003410</u>    | 9  | 5714  | AACAUUCA   | 5706  | 3 UTR | 0.0119 | 1 |
| <u>ZFX</u>     | <u>NM_003410</u>    | 8  | 5713  | ACAUUCA    | 5706  | 3 UTR | 0.0467 | 2 |
| <u>ZFX</u>     | <u>NM_003410</u>    | 9  | 5714  | AACAUUCA   | 5706  | 3 UTR | 0.0119 | 1 |
| <u>ZFX</u>     | <u>NM_003410</u>    | 8  | 5713  | ACAUUCA    | 5706  | 3 UTR | 0.0467 | 2 |
| <u>ZFYVE16</u> | <u>NM_001105251</u> | 8  | 5655  | AACAUUCA   | 5648  | 3 UTR | 0.0345 | 1 |
| <u>ZFYVE16</u> | <u>NM_001105251</u> | 8  | 5655  | AACAUUCA   | 5648  | 3 UTR | 0.0345 | 1 |
| <u>ZFYVE26</u> | <u>NM_015346</u>    | 10 | 9634  | AACAUUCAAC | 9625  | 3 UTR | 0.0018 | 1 |
| <u>ZFYVE26</u> | <u>NM_015346</u>    | 9  | 9633  | ACAUUCAAC  | 9625  | 3 UTR | 0.0073 | 2 |
| <u>ZFYVE26</u> | <u>NM_015346</u>    | 10 | 9634  | AACAUUCAAC | 9625  | 3 UTR | 0.0018 | 1 |
| <u>ZFYVE26</u> | <u>NM_015346</u>    | 9  | 9633  | ACAUUCAAC  | 9625  | 3 UTR | 0.0073 | 2 |
| <u>ZFYVE27</u> | <u>NM_001002261</u> | 8  | 1950  | ACAUUCA    | 1943  | 3 UTR | 0.0240 | 2 |
| <u>ZFYVE27</u> | <u>NM_001002261</u> | 8  | 1950  | ACAUUCA    | 1943  | 3 UTR | 0.0240 | 2 |
| <u>ZKSCAN3</u> | <u>NM_024493</u>    | 8  | 2294  | ACAUUCA    | 2287  | 3 UTR | 0.0073 | 2 |

|                |                     |   |      |           |      |       |        |   |
|----------------|---------------------|---|------|-----------|------|-------|--------|---|
| <u>ZKSCAN3</u> | <u>NM_024493</u>    | 8 | 2294 | ACAUUCA   | 2287 | 3 UTR | 0.0073 | 2 |
| <u>ZMAT1</u>   | <u>NM_032441</u>    | 9 | 4907 | AACAUUCA  | 4899 | 3 UTR | 0.0046 | 1 |
| <u>ZMAT1</u>   | <u>NM_032441</u>    | 8 | 4906 | ACAUUCA   | 4899 | 3 UTR | 0.0184 | 2 |
| <u>ZMAT1</u>   | <u>NM_032441</u>    | 9 | 4907 | AACAUUCA  | 4899 | 3 UTR | 0.0046 | 1 |
| <u>ZMAT1</u>   | <u>NM_032441</u>    | 8 | 4906 | ACAUUCA   | 4899 | 3 UTR | 0.0184 | 2 |
| <u>ZMYM1</u>   | <u>NM_024772</u>    | 7 | 3900 | ACAUUCA   | 3894 | 3 UTR | 0.0357 | 2 |
| <u>ZMYM1</u>   | <u>NM_024772</u>    | 7 | 3900 | ACAUUCA   | 3894 | 3 UTR | 0.0357 | 2 |
| <u>ZNF124</u>  | <u>NM_003431</u>    | 8 | 1242 | AACAUUCA  | 1235 | 3 UTR | 0.0101 | 1 |
| <u>ZNF124</u>  | <u>NM_003431</u>    | 7 | 1241 | ACAUUCA   | 1235 | 3 UTR | 0.0398 | 2 |
| <u>ZNF124</u>  | <u>NM_003431</u>    | 7 | 1077 | ACAUUCA   | 1071 | 3 UTR | 0.0398 | 2 |
| <u>ZNF124</u>  | <u>NM_003431</u>    | 8 | 1242 | AACAUUCA  | 1235 | 3 UTR | 0.0101 | 1 |
| <u>ZNF124</u>  | <u>NM_003431</u>    | 7 | 1241 | ACAUUCA   | 1235 | 3 UTR | 0.0398 | 2 |
| <u>ZNF124</u>  | <u>NM_003431</u>    | 7 | 1077 | ACAUUCA   | 1071 | 3 UTR | 0.0398 | 2 |
| <u>ZNF131</u>  | <u>NM_003432</u>    | 7 | 2400 | AACAUUC   | 2394 | 3 UTR | 0.0360 | 1 |
| <u>ZNF131</u>  | <u>NM_003432</u>    | 7 | 2400 | AACAUUC   | 2394 | 3 UTR | 0.0360 | 1 |
| <u>ZNF133</u>  | <u>NM_003434</u>    | 7 | 2559 | AACAUUC   | 2553 | 3 UTR | 0.0120 | 1 |
| <u>ZNF133</u>  | <u>NM_003434</u>    | 7 | 2559 | AACAUUC   | 2553 | 3 UTR | 0.0120 | 1 |
| <u>ZNF200</u>  | <u>NM_003454</u>    | 9 | 2381 | ACAUUCAAC | 2373 | 3 UTR | 0.0060 | 2 |
| <u>ZNF200</u>  | <u>NM_003454</u>    | 9 | 2381 | ACAUUCAAC | 2373 | 3 UTR | 0.0060 | 2 |
| <u>ZNF207</u>  | <u>NM_001098507</u> | 7 | 2096 | ACAUUCA   | 2090 | 3 UTR | 0.0418 | 2 |
| <u>ZNF207</u>  | <u>NM_001098507</u> | 7 | 2096 | ACAUUCA   | 2090 | 3 UTR | 0.0418 | 2 |
| <u>ZNF212</u>  | <u>NM_012256</u>    | 9 | 2657 | ACAUUCAAC | 2649 | 3 UTR | 0.0046 | 2 |
| <u>ZNF212</u>  | <u>NM_012256</u>    | 9 | 2657 | ACAUUCAAC | 2649 | 3 UTR | 0.0046 | 2 |
| <u>ZNF236</u>  | <u>NM_007345</u>    | 8 | 7421 | ACAUUCA   | 7414 | 3 UTR | 0.0360 | 2 |
| <u>ZNF236</u>  | <u>NM_007345</u>    | 8 | 7421 | ACAUUCA   | 7414 | 3 UTR | 0.0360 | 2 |
| <u>ZNF248</u>  | <u>NM_021045</u>    | 8 | 2244 | AACAUUCA  | 2237 | 3 UTR | 0.0395 | 1 |
| <u>ZNF248</u>  | <u>NM_021045</u>    | 8 | 2244 | AACAUUCA  | 2237 | 3 UTR | 0.0395 | 1 |
| <u>ZNF253</u>  | <u>NM_021047</u>    | 7 | 1630 | ACAUUCA   | 1624 | 3 UTR | 0.0453 | 2 |
| <u>ZNF253</u>  | <u>NM_021047</u>    | 7 | 1621 | ACAUUCA   | 1615 | 3 UTR | 0.0453 | 2 |
| <u>ZNF253</u>  | <u>NM_021047</u>    | 7 | 1630 | ACAUUCA   | 1624 | 3 UTR | 0.0453 | 2 |
| <u>ZNF253</u>  | <u>NM_021047</u>    | 7 | 1621 | ACAUUCA   | 1615 | 3 UTR | 0.0453 | 2 |
| <u>ZNF277</u>  | <u>NM_021994</u>    | 8 | 1627 | AACAUUCA  | 1620 | 3 UTR | 0.0182 | 1 |
| <u>ZNF277</u>  | <u>NM_021994</u>    | 8 | 1627 | AACAUUCA  | 1620 | 3 UTR | 0.0182 | 1 |
| <u>ZNF280D</u> | <u>NM_017661</u>    | 8 | 4393 | AACAUUCA  | 4386 | 3 UTR | 0.0200 | 1 |
| <u>ZNF280D</u> | <u>NM_017661</u>    | 8 | 4393 | AACAUUCA  | 4386 | 3 UTR | 0.0200 | 1 |
| <u>ZNF281</u>  | <u>NM_012482</u>    | 7 | 2871 | AACAUUC   | 2865 | 3 UTR | 0.0442 | 1 |
| <u>ZNF281</u>  | <u>NM_012482</u>    | 7 | 2871 | AACAUUC   | 2865 | 3 UTR | 0.0442 | 1 |
| <u>ZNF329</u>  | <u>NM_024620</u>    | 8 | 2671 | ACAUUCA   | 2664 | 3 UTR | 0.0236 | 2 |

|               |                     |   |      |          |      |       |        |   |
|---------------|---------------------|---|------|----------|------|-------|--------|---|
| <u>ZNF329</u> | <u>NM_024620</u>    | 8 | 2671 | ACAUCAA  | 2664 | 3 UTR | 0.0236 | 2 |
| <u>ZNF341</u> | <u>NM_032819</u>    | 7 | 2695 | ACAUUCA  | 2689 | 3 UTR | 0.0457 | 2 |
| <u>ZNF341</u> | <u>NM_032819</u>    | 7 | 2695 | ACAUUCA  | 2689 | 3 UTR | 0.0457 | 2 |
| <u>ZNF345</u> | <u>NM_003419</u>    | 8 | 2075 | AACAUUCA | 2068 | 3 UTR | 0.0199 | 1 |
| <u>ZNF345</u> | <u>NM_003419</u>    | 8 | 2075 | AACAUUCA | 2068 | 3 UTR | 0.0199 | 1 |
| <u>ZNF364</u> | <u>NM_014455</u>    | 8 | 1255 | AACAUUCA | 1248 | 3 UTR | 0.0084 | 1 |
| <u>ZNF364</u> | <u>NM_014455</u>    | 7 | 1254 | ACAUUCA  | 1248 | 3 UTR | 0.0334 | 2 |
| <u>ZNF364</u> | <u>NM_014455</u>    | 8 | 1255 | AACAUUCA | 1248 | 3 UTR | 0.0084 | 1 |
| <u>ZNF364</u> | <u>NM_014455</u>    | 7 | 1254 | ACAUUCA  | 1248 | 3 UTR | 0.0334 | 2 |
| <u>ZNF398</u> | <u>NM_020781</u>    | 8 | 4361 | ACAUCAA  | 4354 | 3 UTR | 0.0483 | 2 |
| <u>ZNF398</u> | <u>NM_020781</u>    | 8 | 4361 | ACAUCAA  | 4354 | 3 UTR | 0.0483 | 2 |
| <u>ZNF418</u> | <u>NM_133460</u>    | 8 | 2855 | ACAUCAA  | 2848 | 3 UTR | 0.0210 | 2 |
| <u>ZNF418</u> | <u>NM_133460</u>    | 8 | 2855 | ACAUCAA  | 2848 | 3 UTR | 0.0210 | 2 |
| <u>ZNF419</u> | <u>NM_001098491</u> | 8 | 2318 | AACAUUCA | 2311 | 3 UTR | 0.0092 | 1 |
| <u>ZNF419</u> | <u>NM_001098491</u> | 7 | 2317 | ACAUUCA  | 2311 | 3 UTR | 0.0364 | 2 |
| <u>ZNF419</u> | <u>NM_001098491</u> | 8 | 2318 | AACAUUCA | 2311 | 3 UTR | 0.0092 | 1 |
| <u>ZNF419</u> | <u>NM_001098491</u> | 7 | 2317 | ACAUUCA  | 2311 | 3 UTR | 0.0364 | 2 |
| <u>ZNF420</u> | <u>NM_144689</u>    | 7 | 2873 | ACAUUCA  | 2867 | 3 UTR | 0.0423 | 2 |
| <u>ZNF420</u> | <u>NM_144689</u>    | 7 | 2873 | ACAUUCA  | 2867 | 3 UTR | 0.0423 | 2 |
| <u>ZNF436</u> | <u>NM_001077195</u> | 8 | 3603 | AACAUUCA | 3596 | 3 UTR | 0.0377 | 1 |
| <u>ZNF436</u> | <u>NM_001077195</u> | 8 | 3603 | AACAUUCA | 3596 | 3 UTR | 0.0377 | 1 |
| <u>ZNF44</u>  | <u>NM_016264</u>    | 7 | 2128 | ACAUUCA  | 2122 | 3 UTR | 0.0372 | 2 |
| <u>ZNF44</u>  | <u>NM_016264</u>    | 7 | 2128 | ACAUUCA  | 2122 | 3 UTR | 0.0372 | 2 |
| <u>ZNF479</u> | <u>NM_033273</u>    | 8 | 1965 | ACAUCAA  | 1958 | 3 UTR | 0.0034 | 2 |
| <u>ZNF479</u> | <u>NM_033273</u>    | 8 | 1965 | ACAUCAA  | 1958 | 3 UTR | 0.0034 | 2 |
| <u>ZNF527</u> | <u>NM_032453</u>    | 8 | 2033 | ACAUCAA  | 2026 | 3 UTR | 0.0474 | 2 |
| <u>ZNF527</u> | <u>NM_032453</u>    | 8 | 2033 | ACAUCAA  | 2026 | 3 UTR | 0.0474 | 2 |
| <u>ZNF540</u> | <u>NM_152606</u>    | 8 | 2851 | AACAUUCA | 2844 | 3 UTR | 0.0154 | 1 |
| <u>ZNF540</u> | <u>NM_152606</u>    | 8 | 2851 | AACAUUCA | 2844 | 3 UTR | 0.0154 | 1 |
| <u>ZNF544</u> | <u>NM_014480</u>    | 8 | 2955 | AACAUUCA | 2948 | 3 UTR | 0.0135 | 1 |
| <u>ZNF544</u> | <u>NM_014480</u>    | 8 | 2955 | AACAUUCA | 2948 | 3 UTR | 0.0135 | 1 |
| <u>ZNF545</u> | <u>NM_133466</u>    | 7 | 1878 | ACAUUCA  | 1872 | 3 UTR | 0.0477 | 2 |
| <u>ZNF545</u> | <u>NM_133466</u>    | 7 | 1878 | ACAUUCA  | 1872 | 3 UTR | 0.0477 | 2 |
| <u>ZNF547</u> | <u>NM_173631</u>    | 8 | 1837 | ACAUCAA  | 1830 | 3 UTR | 0.0209 | 2 |
| <u>ZNF547</u> | <u>NM_173631</u>    | 8 | 1837 | ACAUCAA  | 1830 | 3 UTR | 0.0209 | 2 |
| <u>ZNF566</u> | <u>NM_032838</u>    | 8 | 2369 | AACAUUCA | 2362 | 3 UTR | 0.0196 | 1 |
| <u>ZNF566</u> | <u>NM_032838</u>    | 8 | 2369 | AACAUUCA | 2362 | 3 UTR | 0.0196 | 1 |
| <u>ZNF571</u> | <u>NM_016536</u>    | 8 | 1946 | ACAUCAA  | 1939 | 3 UTR | 0.0055 | 2 |



|               |                     |    |       |            |       |       |        |   |
|---------------|---------------------|----|-------|------------|-------|-------|--------|---|
| <u>ZNF571</u> | <u>NM_016536</u>    | 8  | 1946  | ACAUUCA    | 1939  | 3 UTR | 0.0055 | 2 |
| <u>ZNF575</u> | <u>NM_174945</u>    | 7  | 1708  | ACAUUCA    | 1702  | 3 UTR | 0.0272 | 2 |
| <u>ZNF575</u> | <u>NM_174945</u>    | 7  | 1708  | ACAUUCA    | 1702  | 3 UTR | 0.0272 | 2 |
| <u>ZNF586</u> | <u>NM_017652</u>    | 8  | 1716  | ACAUUCA    | 1709  | 3 UTR | 0.0124 | 2 |
| <u>ZNF586</u> | <u>NM_017652</u>    | 8  | 1716  | ACAUUCA    | 1709  | 3 UTR | 0.0124 | 2 |
| <u>ZNF594</u> | <u>NM_032530</u>    | 8  | 4854  | AACAUUCA   | 4847  | 3 UTR | 0.0344 | 1 |
| <u>ZNF594</u> | <u>NM_032530</u>    | 8  | 3284  | AACAUUCA   | 3277  | 3 UTR | 0.0344 | 1 |
| <u>ZNF594</u> | <u>NM_032530</u>    | 8  | 3358  | ACAUUCA    | 3351  | 3 UTR | 0.0344 | 2 |
| <u>ZNF594</u> | <u>NM_032530</u>    | 8  | 4854  | AACAUUCA   | 4847  | 3 UTR | 0.0344 | 1 |
| <u>ZNF594</u> | <u>NM_032530</u>    | 8  | 3284  | AACAUUCA   | 3277  | 3 UTR | 0.0344 | 1 |
| <u>ZNF594</u> | <u>NM_032530</u>    | 8  | 3358  | ACAUUCA    | 3351  | 3 UTR | 0.0344 | 2 |
| <u>ZNF598</u> | <u>NM_178167</u>    | 7  | 3167  | AACAUUC    | 3161  | 3 UTR | 0.0289 | 1 |
| <u>ZNF598</u> | <u>NM_178167</u>    | 7  | 3167  | AACAUUC    | 3161  | 3 UTR | 0.0289 | 1 |
| <u>ZNF610</u> | <u>NM_173530</u>    | 7  | 1768  | ACAUUCA    | 1762  | 3 UTR | 0.0055 | 2 |
| <u>ZNF610</u> | <u>NM_173530</u>    | 7  | 1768  | ACAUUCA    | 1762  | 3 UTR | 0.0055 | 2 |
| <u>ZNF649</u> | <u>NM_023074</u>    | 8  | 3036  | AACAUUCA   | 3029  | 3 UTR | 0.0210 | 1 |
| <u>ZNF649</u> | <u>NM_023074</u>    | 8  | 3036  | AACAUUCA   | 3029  | 3 UTR | 0.0210 | 1 |
| <u>ZNF652</u> | <u>NM_014897</u>    | 10 | 10641 | AACAUUCAAC | 10632 | 3 UTR | 0.0031 | 1 |
| <u>ZNF652</u> | <u>NM_014897</u>    | 9  | 10640 | ACAUUCAAC  | 10632 | 3 UTR | 0.0125 | 2 |
| <u>ZNF652</u> | <u>NM_014897</u>    | 8  | 7882  | ACAUUCA    | 7875  | 3 UTR | 0.0489 | 2 |
| <u>ZNF652</u> | <u>NM_014897</u>    | 10 | 10641 | AACAUUCAAC | 10632 | 3 UTR | 0.0031 | 1 |
| <u>ZNF652</u> | <u>NM_014897</u>    | 9  | 10640 | ACAUUCAAC  | 10632 | 3 UTR | 0.0125 | 2 |
| <u>ZNF652</u> | <u>NM_014897</u>    | 8  | 7882  | ACAUUCA    | 7875  | 3 UTR | 0.0489 | 2 |
| <u>ZNF654</u> | <u>NM_018293</u>    | 10 | 4813  | AACAUUCAAC | 4804  | 3 UTR | 0.0029 | 1 |
| <u>ZNF654</u> | <u>NM_018293</u>    | 9  | 4812  | ACAUUCAAC  | 4804  | 3 UTR | 0.0114 | 2 |
| <u>ZNF654</u> | <u>NM_018293</u>    | 10 | 4813  | AACAUUCAAC | 4804  | 3 UTR | 0.0029 | 1 |
| <u>ZNF654</u> | <u>NM_018293</u>    | 9  | 4812  | ACAUUCAAC  | 4804  | 3 UTR | 0.0114 | 2 |
| <u>ZNF655</u> | <u>NM_001083956</u> | 8  | 2231  | ACAUUCA    | 2224  | 3 UTR | 0.0431 | 2 |
| <u>ZNF655</u> | <u>NM_001083956</u> | 8  | 2231  | ACAUUCA    | 2224  | 3 UTR | 0.0431 | 2 |
| <u>ZNF664</u> | <u>NM_152437</u>    | 8  | 2803  | ACAUUCA    | 2796  | 3 UTR | 0.0376 | 2 |
| <u>ZNF664</u> | <u>NM_152437</u>    | 8  | 2803  | ACAUUCA    | 2796  | 3 UTR | 0.0376 | 2 |
| <u>ZNF667</u> | <u>NM_022103</u>    | 8  | 3047  | AACAUUCA   | 3040  | 3 UTR | 0.0203 | 1 |
| <u>ZNF667</u> | <u>NM_022103</u>    | 8  | 3047  | AACAUUCA   | 3040  | 3 UTR | 0.0203 | 1 |
| <u>ZNF674</u> | <u>NM_001039891</u> | 8  | 4014  | ACAUUCA    | 4007  | 3 UTR | 0.0111 | 2 |
| <u>ZNF674</u> | <u>NM_001039891</u> | 7  | 2246  | ACAUUCA    | 2240  | 3 UTR | 0.0437 | 2 |
| <u>ZNF674</u> | <u>NM_001039891</u> | 8  | 4014  | ACAUUCA    | 4007  | 3 UTR | 0.0111 | 2 |
| <u>ZNF674</u> | <u>NM_001039891</u> | 7  | 2246  | ACAUUCA    | 2240  | 3 UTR | 0.0437 | 2 |
| <u>ZNF697</u> | <u>NM_001080470</u> | 8  | 2991  | AACAUUCA   | 2984  | 3 UTR | 0.0495 | 1 |

|               |                     |   |       |          |       |       |        |   |
|---------------|---------------------|---|-------|----------|-------|-------|--------|---|
| <u>ZNF697</u> | <u>NM_001080470</u> | 8 | 2991  | AACAUUCA | 2984  | 3 UTR | 0.0495 | 1 |
| <u>ZNF700</u> | <u>NM_144566</u>    | 7 | 2723  | ACAUUCA  | 2717  | 3 UTR | 0.0318 | 2 |
| <u>ZNF700</u> | <u>NM_144566</u>    | 7 | 2639  | ACAUUCA  | 2633  | 3 UTR | 0.0318 | 2 |
| <u>ZNF700</u> | <u>NM_144566</u>    | 7 | 2723  | ACAUUCA  | 2717  | 3 UTR | 0.0318 | 2 |
| <u>ZNF700</u> | <u>NM_144566</u>    | 7 | 2639  | ACAUUCA  | 2633  | 3 UTR | 0.0318 | 2 |
| <u>ZNF750</u> | <u>NM_024702</u>    | 8 | 3066  | AACAUUCA | 3059  | 3 UTR | 0.0112 | 1 |
| <u>ZNF750</u> | <u>NM_024702</u>    | 7 | 3065  | ACAUUCA  | 3059  | 3 UTR | 0.0439 | 2 |
| <u>ZNF750</u> | <u>NM_024702</u>    | 8 | 3066  | AACAUUCA | 3059  | 3 UTR | 0.0112 | 1 |
| <u>ZNF750</u> | <u>NM_024702</u>    | 7 | 3065  | ACAUUCA  | 3059  | 3 UTR | 0.0439 | 2 |
| <u>ZNF767</u> | <u>NM_024910</u>    | 9 | 991   | AACAUUCA | 983   | 3 UTR | 0.0110 | 1 |
| <u>ZNF767</u> | <u>NM_024910</u>    | 8 | 990   | ACAUUCA  | 983   | 3 UTR | 0.0431 | 2 |
| <u>ZNF767</u> | <u>NM_024910</u>    | 9 | 991   | AACAUUCA | 983   | 3 UTR | 0.0110 | 1 |
| <u>ZNF767</u> | <u>NM_024910</u>    | 8 | 990   | ACAUUCA  | 983   | 3 UTR | 0.0431 | 2 |
| <u>ZNF781</u> | <u>NM_152605</u>    | 8 | 2351  | ACAUUCA  | 2344  | 3 UTR | 0.0214 | 2 |
| <u>ZNF781</u> | <u>NM_152605</u>    | 8 | 2351  | ACAUUCA  | 2344  | 3 UTR | 0.0214 | 2 |
| <u>ZNF792</u> | <u>NM_175872</u>    | 8 | 3297  | ACAUUCA  | 3290  | 3 UTR | 0.0243 | 2 |
| <u>ZNF792</u> | <u>NM_175872</u>    | 8 | 3297  | ACAUUCA  | 3290  | 3 UTR | 0.0243 | 2 |
| <u>ZNF800</u> | <u>NM_176814</u>    | 8 | 4101  | ACAUUCA  | 4094  | 3 UTR | 0.0232 | 2 |
| <u>ZNF800</u> | <u>NM_176814</u>    | 8 | 4101  | ACAUUCA  | 4094  | 3 UTR | 0.0232 | 2 |
| <u>ZNF823</u> | <u>NM_001080493</u> | 7 | 2042  | ACAUUCA  | 2036  | 3 UTR | 0.0274 | 2 |
| <u>ZNF823</u> | <u>NM_001080493</u> | 7 | 2042  | ACAUUCA  | 2036  | 3 UTR | 0.0274 | 2 |
| <u>ZNF83</u>  | <u>NM_001105549</u> | 7 | 2547  | ACAUUCA  | 2541  | 3 UTR | 0.0401 | 2 |
| <u>ZNF83</u>  | <u>NM_001105549</u> | 7 | 2464  | ACAUUCA  | 2458  | 3 UTR | 0.0401 | 2 |
| <u>ZNF83</u>  | <u>NM_001105549</u> | 7 | 2380  | ACAUUCA  | 2374  | 3 UTR | 0.0401 | 2 |
| <u>ZNF83</u>  | <u>NM_001105549</u> | 7 | 2547  | ACAUUCA  | 2541  | 3 UTR | 0.0401 | 2 |
| <u>ZNF83</u>  | <u>NM_001105549</u> | 7 | 2464  | ACAUUCA  | 2458  | 3 UTR | 0.0401 | 2 |
| <u>ZNF83</u>  | <u>NM_001105549</u> | 7 | 2380  | ACAUUCA  | 2374  | 3 UTR | 0.0401 | 2 |
| <u>ZNRF4</u>  | <u>NM_181710</u>    | 7 | 1405  | AACAUUC  | 1399  | 3 UTR | 0.0046 | 1 |
| <u>ZNRF4</u>  | <u>NM_181710</u>    | 7 | 1405  | AACAUUC  | 1399  | 3 UTR | 0.0046 | 1 |
| <u>ZRANB2</u> | <u>NM_005455</u>    | 8 | 2458  | AACAUUCA | 2451  | 3 UTR | 0.0286 | 1 |
| <u>ZRANB2</u> | <u>NM_005455</u>    | 8 | 2458  | AACAUUCA | 2451  | 3 UTR | 0.0286 | 1 |
| <u>ZSWIM1</u> | <u>NM_080603</u>    | 8 | 2159  | AACAUUCA | 2152  | 3 UTR | 0.0101 | 1 |
| <u>ZSWIM1</u> | <u>NM_080603</u>    | 7 | 2158  | ACAUUCA  | 2152  | 3 UTR | 0.0399 | 2 |
| <u>ZSWIM1</u> | <u>NM_080603</u>    | 8 | 2159  | AACAUUCA | 2152  | 3 UTR | 0.0101 | 1 |
| <u>ZSWIM1</u> | <u>NM_080603</u>    | 7 | 2158  | ACAUUCA  | 2152  | 3 UTR | 0.0399 | 2 |
| <u>ZXDC</u>   | <u>NM_001040653</u> | 8 | 12517 | AACAUUCA | 12510 | 3 UTR | 0.0404 | 1 |
| <u>ZXDC</u>   | <u>NM_001040653</u> | 8 | 9449  | ACAUUCA  | 9442  | 3 UTR | 0.0404 | 2 |
| <u>ZXDC</u>   | <u>NM_001040653</u> | 8 | 12517 | AACAUUCA | 12510 | 3 UTR | 0.0404 | 1 |

|             |                     |   |      |          |      |       |        |   |
|-------------|---------------------|---|------|----------|------|-------|--------|---|
| <u>ZXDC</u> | <u>NM_001040653</u> | 8 | 9449 | ACAUUCA  | 9442 | 3 UTR | 0.0404 | 2 |
| <u>ZZZ3</u> | <u>NM_015534</u>    | 8 | 3840 | AACAUUCA | 3833 | 3 UTR | 0.0175 | 1 |
| <u>ZZZ3</u> | <u>NM_015534</u>    | 8 | 3840 | AACAUUCA | 3833 | 3 UTR | 0.0175 | 1 |

**Supplementary Table 21. A summary of predicted targets of hsa-miR-181a by all 8 programs.**

| Gene            | DIANA-mT | miRanda | miRDB | miRWalk | RNAhybrid | PICTAR4 | PICTAR5 | PITA | RNA22 | Targetscan | SUM |
|-----------------|----------|---------|-------|---------|-----------|---------|---------|------|-------|------------|-----|
| <u>RNF145</u>   | 1        | 1       | 1     | 1       | 1         | 1       | 1       | 1    | 1     | 1          | 10  |
| <u>TCERG1</u>   | 1        | 1       | 1     | 1       | 1         | 1       | 1       | 0    | 1     | 1          | 9   |
| <u>SIRT1</u>    | 1        | 1       | 1     | 1       | 1         | 1       | 1       | 0    | 1     | 1          | 9   |
| <u>SS18L1</u>   | 1        | 1       | 1     | 1       | 1         | 1       | 1       | 1    | 0     | 1          | 9   |
| <u>NR6A1</u>    | 1        | 1       | 1     | 1       | 1         | 1       | 1       | 0    | 1     | 1          | 9   |
| <u>FOXP1</u>    | 1        | 1       | 1     | 1       | 1         | 1       | 1       | 1    | 0     | 1          | 9   |
| <u>GLS</u>      | 1        | 1       | 1     | 1       | 1         | 1       | 1       | 1    | 0     | 1          | 9   |
| <u>HOXA11</u>   | 1        | 1       | 1     | 1       | 1         | 1       | 1       | 0    | 1     | 1          | 9   |
| <u>SMAD7</u>    | 1        | 1       | 1     | 1       | 1         | 0       | 1       | 1    | 1     | 1          | 9   |
| <u>MAP1B</u>    | 1        | 1       | 1     | 1       | 1         | 1       | 1       | 0    | 1     | 1          | 9   |
| <u>INOC1</u>    | 1        | 1       | 1     | 1       | 1         | 1       | 1       | 0    | 1     | 1          | 9   |
| <u>CDKN2AIP</u> | 1        | 1       | 1     | 1       | 1         | 0       | 1       | 1    | 1     | 1          | 9   |
| <u>LRRN1</u>    | 1        | 1       | 1     | 1       | 1         | 1       | 1       | 1    | 0     | 1          | 9   |
| <u>TGFBI</u>    | 1        | 1       | 1     | 1       | 1         | 0       | 1       | 1    | 1     | 1          | 9   |
| <u>YWHAG</u>    | 1        | 1       | 1     | 1       | 1         | 1       | 1       | 1    | 0     | 1          | 9   |
| <u>C17orf39</u> | 1        | 1       | 1     | 1       | 1         | 1       | 1       | 1    | 0     | 1          | 9   |
| <u>CHD9</u>     | 1        | 1       | 1     | 1       | 1         | 1       | 1       | 0    | 1     | 1          | 9   |
| <u>NAT13</u>    | 1        | 1       | 1     | 1       | 1         | 1       | 1       | 1    | 0     | 1          | 9   |
| <u>C6orf62</u>  | 1        | 1       | 1     | 1       | 1         | 1       | 1       | 0    | 1     | 1          | 9   |
| <u>ACVR2A</u>   | 1        | 1       | 1     | 1       | 1         | 1       | 1       | 1    | 0     | 1          | 9   |
| <u>DCLK1</u>    | 1        | 1       | 1     | 1       | 1         | 1       | 1       | 1    | 0     | 1          | 9   |
| <u>NMT2</u>     | 1        | 1       | 1     | 1       | 1         | 1       | 1       | 0    | 1     | 1          | 9   |
| <u>NPEPPS</u>   | 1        | 1       | 1     | 1       | 1         | 1       | 1       | 0    | 1     | 1          | 9   |
| <u>KIAA0195</u> | 1        | 1       | 1     | 1       | 1         | 0       | 1       | 1    | 1     | 1          | 9   |
| <u>CDH13</u>    | 1        | 1       | 0     | 1       | 1         | 1       | 1       | 0    | 1     | 1          | 8   |
| <u>PDIA6</u>    | 1        | 1       | 0     | 1       | 1         | 0       | 1       | 1    | 1     | 1          | 8   |
| <u>IPO8</u>     | 1        | 1       | 1     | 1       | 1         | 0       | 1       | 0    | 1     | 1          | 8   |
| <u>IGF2BP2</u>  | 1        | 1       | 1     | 1       | 1         | 1       | 1       | 0    | 0     | 1          | 8   |
| <u>SLITRK1</u>  | 1        | 1       | 1     | 1       | 1         | 1       | 1       | 0    | 0     | 1          | 8   |
| <u>SSX2IP</u>   | 1        | 1       | 1     | 1       | 1         | 1       | 1       | 0    | 0     | 1          | 8   |
| <u>COL16A1</u>  | 1        | 1       | 0     | 1       | 1         | 0       | 1       | 1    | 1     | 1          | 8   |
| <u>ADM</u>      | 1        | 1       | 1     | 1       | 1         | 1       | 1       | 0    | 0     | 1          | 8   |
| <u>ZNF800</u>   | 1        | 1       | 1     | 1       | 1         | 1       | 1       | 0    | 0     | 1          | 8   |
| <u>ADAMTS18</u> | 1        | 1       | 1     | 1       | 1         | 1       | 1       | 0    | 0     | 1          | 8   |
| <u>DPYSL2</u>   | 1        | 1       | 1     | 1       | 1         | 1       | 1       | 0    | 0     | 1          | 8   |
| <u>E2F5</u>     | 1        | 1       | 1     | 1       | 1         | 1       | 1       | 0    | 0     | 1          | 8   |
| <u>EIF4A2</u>   | 1        | 1       | 1     | 1       | 1         | 1       | 1       | 0    | 0     | 1          | 8   |
| <u>EN2</u>      | 1        | 1       | 1     | 1       | 1         | 1       | 1       | 0    | 0     | 1          | 8   |

|                 |   |   |   |   |   |   |   |   |   |   |   |
|-----------------|---|---|---|---|---|---|---|---|---|---|---|
| <u>ETV6</u>     | 1 | 1 | 1 | 1 | 1 | 1 | 1 | 0 | 0 | 1 | 8 |
| <u>ACSL1</u>    | 1 | 1 | 1 | 1 | 1 | 0 | 1 | 0 | 1 | 1 | 8 |
| <u>FBN2</u>     | 1 | 1 | 1 | 1 | 1 | 0 | 1 | 0 | 1 | 1 | 8 |
| <u>C7orf41</u>  | 1 | 1 | 1 | 1 | 1 | 1 | 1 | 0 | 0 | 1 | 8 |
| <u>FKBP1A</u>   | 1 | 1 | 1 | 1 | 1 | 0 | 1 | 0 | 1 | 1 | 8 |
| <u>BTBD3</u>    | 1 | 1 | 1 | 1 | 1 | 1 | 1 | 0 | 0 | 1 | 8 |
| <u>KIAA0423</u> | 1 | 1 | 1 | 1 | 1 | 0 | 1 | 0 | 1 | 1 | 8 |
| <u>HIC2</u>     | 1 | 1 | 1 | 1 | 1 | 1 | 1 | 0 | 0 | 1 | 8 |
| <u>KANK1</u>    | 1 | 0 | 1 | 1 | 1 | 1 | 1 | 0 | 1 | 1 | 8 |
| <u>HISPPD1</u>  | 1 | 1 | 1 | 1 | 1 | 0 | 1 | 0 | 1 | 1 | 8 |
| <u>SYNE1</u>    | 0 | 1 | 1 | 1 | 1 | 1 | 1 | 0 | 1 | 1 | 8 |
| <u>ZNF281</u>   | 1 | 1 | 0 | 1 | 1 | 1 | 1 | 1 | 1 | 0 | 8 |
| <u>FOS</u>      | 1 | 1 | 0 | 1 | 1 | 1 | 1 | 0 | 1 | 1 | 8 |
| <u>LEMD3</u>    | 1 | 1 | 1 | 1 | 1 | 1 | 1 | 0 | 0 | 1 | 8 |
| <u>BRD1</u>     | 1 | 1 | 1 | 1 | 1 | 1 | 1 | 0 | 0 | 1 | 8 |
| <u>OSBPL3</u>   | 1 | 1 | 1 | 1 | 1 | 1 | 1 | 0 | 0 | 1 | 8 |
| <u>EPC2</u>     | 1 | 1 | 1 | 1 | 1 | 1 | 1 | 0 | 0 | 1 | 8 |
| <u>GAPVD1</u>   | 1 | 1 | 1 | 1 | 1 | 1 | 1 | 0 | 0 | 1 | 8 |
| <u>GATA6</u>    | 1 | 1 | 1 | 1 | 1 | 1 | 1 | 0 | 0 | 1 | 8 |
| <u>NPTN</u>     | 1 | 1 | 0 | 1 | 1 | 1 | 1 | 1 | 0 | 1 | 8 |
| <u>ATP11C</u>   | 1 | 1 | 1 | 1 | 1 | 0 | 1 | 1 | 0 | 1 | 8 |
| <u>KLF15</u>    | 1 | 1 | 1 | 1 | 1 | 1 | 1 | 0 | 0 | 1 | 8 |
| <u>LRP12</u>    | 1 | 1 | 1 | 1 | 1 | 1 | 1 | 0 | 0 | 1 | 8 |
| <u>BAZ2B</u>    | 1 | 1 | 1 | 1 | 1 | 1 | 1 | 0 | 0 | 1 | 8 |
| <u>HLF</u>      | 1 | 1 | 1 | 1 | 1 | 1 | 1 | 0 | 0 | 1 | 8 |
| <u>HOXA1</u>    | 1 | 1 | 1 | 1 | 0 | 0 | 1 | 1 | 1 | 1 | 8 |
| <u>ID4</u>      | 1 | 1 | 0 | 1 | 1 | 1 | 1 | 0 | 1 | 1 | 8 |
| <u>JARID2</u>   | 1 | 1 | 0 | 1 | 1 | 1 | 1 | 0 | 1 | 1 | 8 |
| <u>KPNA1</u>    | 1 | 1 | 1 | 1 | 1 | 0 | 1 | 0 | 1 | 1 | 8 |
| <u>KPNA4</u>    | 1 | 1 | 1 | 1 | 0 | 0 | 1 | 1 | 1 | 1 | 8 |
| <u>KRAS</u>     | 1 | 1 | 1 | 1 | 1 | 1 | 1 | 0 | 0 | 1 | 8 |
| <u>LIN28B</u>   | 1 | 1 | 1 | 1 | 1 | 1 | 1 | 0 | 0 | 1 | 8 |
| <u>LMO1</u>     | 1 | 1 | 0 | 1 | 1 | 1 | 1 | 0 | 1 | 1 | 8 |
| <u>MAT2A</u>    | 1 | 1 | 1 | 1 | 1 | 0 | 1 | 1 | 0 | 1 | 8 |
| <u>MAP3K3</u>   | 1 | 0 | 1 | 1 | 1 | 1 | 1 | 1 | 0 | 1 | 8 |
| <u>ATP1B1</u>   | 1 | 0 | 1 | 1 | 1 | 1 | 1 | 0 | 1 | 1 | 8 |
| <u>NOVA1</u>    | 1 | 1 | 1 | 1 | 1 | 1 | 1 | 0 | 0 | 1 | 8 |
| <u>ATP2B2</u>   | 1 | 1 | 1 | 1 | 1 | 1 | 1 | 0 | 0 | 1 | 8 |
| <u>PAWR</u>     | 1 | 1 | 1 | 1 | 1 | 0 | 1 | 0 | 1 | 1 | 8 |
| <u>PBX3</u>     | 1 | 1 | 1 | 1 | 1 | 1 | 1 | 0 | 0 | 1 | 8 |
| <u>PHF20L1</u>  | 1 | 1 | 1 | 1 | 1 | 1 | 1 | 0 | 0 | 1 | 8 |

|                  |   |   |   |   |   |   |   |   |   |   |   |
|------------------|---|---|---|---|---|---|---|---|---|---|---|
| <u>PDGFRA</u>    | 1 | 1 | 1 | 1 | 1 | 1 | 1 | 0 | 0 | 1 | 8 |
| <u>HECA</u>      | 1 | 1 | 1 | 1 | 1 | 1 | 1 | 0 | 0 | 1 | 8 |
| <u>SLC38A2</u>   | 1 | 1 | 1 | 1 | 1 | 1 | 1 | 0 | 0 | 1 | 8 |
| <u>AFTPH</u>     | 1 | 1 | 1 | 1 | 1 | 1 | 1 | 0 | 0 | 1 | 8 |
| <u>PI4K2B</u>    | 1 | 1 | 1 | 1 | 1 | 1 | 1 | 0 | 0 | 1 | 8 |
| <u>CHD7</u>      | 1 | 1 | 0 | 1 | 1 | 1 | 1 | 0 | 1 | 1 | 8 |
| <u>PRKCE</u>     | 1 | 1 | 1 | 1 | 1 | 1 | 1 | 0 | 0 | 1 | 8 |
| <u>LMO3</u>      | 1 | 0 | 1 | 1 | 1 | 1 | 1 | 1 | 0 | 1 | 8 |
| <u>CTTNBP2NL</u> | 1 | 1 | 1 | 1 | 1 | 1 | 1 | 0 | 0 | 1 | 8 |
| <u>MAP2K1</u>    | 1 | 1 | 1 | 1 | 1 | 0 | 1 | 0 | 1 | 1 | 8 |
| <u>PCDHA6</u>    | 1 | 1 | 1 | 1 | 1 | 1 | 1 | 0 | 0 | 1 | 8 |
| <u>TM9SF3</u>    | 1 | 1 | 1 | 1 | 1 | 1 | 1 | 0 | 0 | 1 | 8 |
| <u>ZBTB4</u>     | 1 | 1 | 1 | 1 | 1 | 0 | 1 | 1 | 0 | 1 | 8 |
| <u>BAI3</u>      | 1 | 1 | 1 | 1 | 1 | 1 | 1 | 0 | 0 | 1 | 8 |
| <u>RAD21</u>     | 1 | 1 | 1 | 1 | 1 | 1 | 1 | 0 | 0 | 1 | 8 |
| <u>RLF</u>       | 1 | 1 | 1 | 1 | 1 | 1 | 1 | 0 | 0 | 1 | 8 |
| <u>PKNOX2</u>    | 1 | 1 | 1 | 1 | 1 | 0 | 1 | 1 | 0 | 1 | 8 |
| <u>SEL1L</u>     | 1 | 1 | 1 | 1 | 1 | 1 | 1 | 0 | 0 | 1 | 8 |
| <u>MPP5</u>      | 1 | 1 | 1 | 1 | 1 | 1 | 1 | 0 | 0 | 1 | 8 |
| <u>SOX5</u>      | 1 | 0 | 1 | 1 | 1 | 1 | 1 | 0 | 1 | 1 | 8 |
| <u>STC1</u>      | 1 | 1 | 1 | 1 | 1 | 0 | 1 | 1 | 0 | 1 | 8 |
| <u>TIMP3</u>     | 1 | 1 | 1 | 1 | 1 | 1 | 1 | 0 | 0 | 1 | 8 |
| <u>ZIC2</u>      | 1 | 1 | 0 | 1 | 1 | 1 | 1 | 0 | 1 | 1 | 8 |
| <u>ZIC3</u>      | 1 | 1 | 1 | 1 | 1 | 1 | 1 | 0 | 0 | 1 | 8 |
| <u>CALB1</u>     | 1 | 1 | 1 | 1 | 0 | 0 | 1 | 1 | 1 | 1 | 8 |
| <u>ARSJ</u>      | 1 | 1 | 1 | 1 | 1 | 1 | 1 | 0 | 0 | 1 | 8 |
| <u>RNF34</u>     | 1 | 0 | 1 | 1 | 1 | 0 | 1 | 1 | 1 | 1 | 8 |
| <u>C13orf23</u>  | 1 | 1 | 1 | 1 | 1 | 0 | 1 | 1 | 0 | 1 | 8 |
| <u>CPEB4</u>     | 1 | 1 | 1 | 1 | 1 | 1 | 1 | 0 | 0 | 1 | 8 |
| <u>ANKRD13C</u>  | 1 | 1 | 1 | 1 | 1 | 1 | 1 | 0 | 0 | 1 | 8 |
| <u>CUL3</u>      | 1 | 1 | 1 | 1 | 1 | 1 | 1 | 0 | 0 | 1 | 8 |
| <u>PIK3R3</u>    | 1 | 1 | 1 | 1 | 1 | 1 | 1 | 0 | 0 | 1 | 8 |
| <u>DOCK7</u>     | 1 | 1 | 1 | 1 | 1 | 1 | 1 | 0 | 0 | 1 | 8 |
| <u>IRS2</u>      | 1 | 1 | 1 | 1 | 1 | 1 | 1 | 0 | 0 | 1 | 8 |
| <u>CBLB</u>      | 1 | 1 | 1 | 1 | 1 | 1 | 1 | 0 | 0 | 1 | 8 |
| <u>PCAF</u>      | 1 | 1 | 1 | 1 | 1 | 1 | 1 | 0 | 0 | 1 | 8 |
| <u>DHX57</u>     | 1 | 1 | 1 | 1 | 1 | 0 | 1 | 0 | 1 | 1 | 8 |
| <u>NRXN1</u>     | 1 | 1 | 1 | 1 | 1 | 1 | 1 | 0 | 0 | 1 | 8 |
| <u>AKAP7</u>     | 1 | 1 | 1 | 1 | 1 | 1 | 1 | 0 | 0 | 1 | 8 |
| <u>TBPL1</u>     | 1 | 1 | 1 | 1 | 1 | 1 | 1 | 0 | 0 | 1 | 8 |
| <u>TOX</u>       | 1 | 1 | 1 | 1 | 1 | 1 | 1 | 0 | 0 | 1 | 8 |

|                 |   |   |   |   |   |   |   |   |   |   |   |
|-----------------|---|---|---|---|---|---|---|---|---|---|---|
| <u>KIAA0528</u> | 1 | 1 | 1 | 1 | 1 | 0 | 1 | 0 | 1 | 1 | 8 |
| <u>LRBA</u>     | 1 | 1 | 1 | 1 | 1 | 1 | 1 | 0 | 0 | 1 | 8 |
| <u>G3BP2</u>    | 1 | 1 | 1 | 1 | 1 | 1 | 1 | 0 | 0 | 1 | 8 |
| <u>CLASP1</u>   | 1 | 1 | 1 | 0 | 1 | 1 | 1 | 1 | 0 | 1 | 8 |
| <u>FBXO33</u>   | 1 | 1 | 1 | 0 | 1 | 1 | 1 | 0 | 1 | 1 | 8 |
| <u>MAMDC2</u>   | 1 | 1 | 1 | 0 | 1 | 1 | 1 | 0 | 1 | 1 | 8 |
| <u>ATP2A2</u>   | 1 | 1 | 1 | 0 | 1 | 1 | 1 | 1 | 1 | 0 | 8 |
| <u>TOM1L1</u>   | 1 | 1 | 1 | 1 | 1 | 0 | 1 | 0 | 0 | 1 | 7 |
| <u>CTDSPL</u>   | 1 | 1 | 1 | 1 | 0 | 0 | 1 | 1 | 0 | 1 | 7 |
| <u>KCNMB2</u>   | 1 | 1 | 1 | 1 | 0 | 0 | 1 | 0 | 1 | 1 | 7 |
| <u>CDKN3</u>    | 1 | 1 | 1 | 1 | 0 | 0 | 1 | 0 | 1 | 1 | 7 |
| <u>PCGF3</u>    | 1 | 1 | 1 | 1 | 0 | 0 | 1 | 1 | 0 | 1 | 7 |
| <u>CARM1</u>    | 1 | 1 | 0 | 1 | 1 | 0 | 1 | 1 | 0 | 1 | 7 |
| <u>NCOA2</u>    | 0 | 1 | 1 | 1 | 1 | 1 | 1 | 0 | 0 | 1 | 7 |
| <u>CEBPG</u>    | 1 | 1 | 1 | 1 | 0 | 0 | 1 | 1 | 0 | 1 | 7 |
| <u>ARFGEF2</u>  | 1 | 1 | 1 | 1 | 1 | 0 | 1 | 0 | 0 | 1 | 7 |
| <u>ADCY1</u>    | 1 | 1 | 0 | 1 | 1 | 1 | 1 | 0 | 0 | 1 | 7 |
| <u>C1orf2</u>   | 1 | 1 | 0 | 1 | 1 | 0 | 1 | 1 | 0 | 1 | 7 |
| <u>NFAT5</u>    | 1 | 0 | 1 | 1 | 1 | 0 | 1 | 1 | 0 | 1 | 7 |
| <u>METAP2</u>   | 1 | 1 | 1 | 1 | 0 | 0 | 1 | 0 | 1 | 1 | 7 |
| <u>ADAMTS6</u>  | 1 | 1 | 0 | 1 | 1 | 1 | 1 | 0 | 0 | 1 | 7 |
| <u>WIF1</u>     | 1 | 1 | 1 | 1 | 0 | 0 | 1 | 0 | 1 | 1 | 7 |
| <u>KLHL2</u>    | 1 | 0 | 1 | 1 | 1 | 1 | 1 | 0 | 0 | 1 | 7 |
| <u>OSBPL8</u>   | 1 | 1 | 1 | 1 | 1 | 0 | 1 | 0 | 0 | 1 | 7 |
| <u>FAT3</u>     | 1 | 1 | 1 | 1 | 0 | 0 | 1 | 1 | 0 | 1 | 7 |
| <u>CNR1</u>     | 1 | 1 | 0 | 1 | 1 | 1 | 1 | 0 | 0 | 1 | 7 |
| <u>MBOAT2</u>   | 1 | 1 | 1 | 1 | 1 | 0 | 1 | 0 | 0 | 1 | 7 |
| <u>KLF6</u>     | 0 | 1 | 1 | 1 | 1 | 1 | 1 | 0 | 0 | 1 | 7 |
| <u>CPEB2</u>    | 1 | 1 | 0 | 1 | 1 | 1 | 1 | 0 | 0 | 1 | 7 |
| <u>PRRC1</u>    | 1 | 1 | 1 | 1 | 0 | 0 | 1 | 1 | 0 | 1 | 7 |
| <u>ANKRD43</u>  | 1 | 1 | 1 | 1 | 1 | 0 | 1 | 0 | 0 | 1 | 7 |
| <u>CPD</u>      | 1 | 1 | 1 | 1 | 1 | 0 | 1 | 0 | 0 | 1 | 7 |
| <u>CREB1</u>    | 1 | 1 | 0 | 1 | 1 | 1 | 1 | 0 | 0 | 1 | 7 |
| <u>CNTN4</u>    | 1 | 1 | 1 | 1 | 1 | 0 | 1 | 0 | 0 | 1 | 7 |
| <u>NKAIN2</u>   | 1 | 1 | 1 | 1 | 0 | 0 | 1 | 1 | 0 | 1 | 7 |
| <u>ADRBK1</u>   | 1 | 1 | 1 | 1 | 0 | 0 | 1 | 0 | 1 | 1 | 7 |
| <u>ESCO2</u>    | 1 | 1 | 1 | 1 | 0 | 0 | 1 | 1 | 0 | 1 | 7 |
| <u>RLBP1L1</u>  | 1 | 1 | 1 | 1 | 0 | 0 | 1 | 1 | 0 | 1 | 7 |
| <u>DARS</u>     | 1 | 1 | 1 | 1 | 0 | 0 | 1 | 0 | 1 | 1 | 7 |
| <u>DYNC1L12</u> | 1 | 1 | 1 | 1 | 1 | 0 | 1 | 0 | 0 | 1 | 7 |
| <u>CREG2</u>    | 1 | 1 | 1 | 1 | 0 | 0 | 1 | 1 | 0 | 1 | 7 |

|                  |   |   |   |   |   |   |   |   |   |   |   |
|------------------|---|---|---|---|---|---|---|---|---|---|---|
| <u>EN1</u>       | 1 | 1 | 1 | 1 | 1 | 0 | 1 | 0 | 0 | 1 | 7 |
| <u>EPHA4</u>     | 1 | 1 | 0 | 1 | 1 | 1 | 1 | 0 | 0 | 1 | 7 |
| <u>CLN8</u>      | 1 | 1 | 1 | 1 | 0 | 0 | 1 | 1 | 0 | 1 | 7 |
| <u>EPS8</u>      | 1 | 1 | 0 | 1 | 1 | 0 | 1 | 0 | 1 | 1 | 7 |
| <u>BPTF</u>      | 1 | 1 | 0 | 1 | 1 | 1 | 1 | 0 | 0 | 1 | 7 |
| <u>ARL5B</u>     | 1 | 1 | 1 | 1 | 1 | 0 | 1 | 0 | 0 | 1 | 7 |
| <u>JAZF1</u>     | 1 | 1 | 0 | 1 | 1 | 1 | 1 | 0 | 0 | 1 | 7 |
| <u>ALDH9A1</u>   | 1 | 1 | 1 | 1 | 0 | 0 | 1 | 1 | 0 | 1 | 7 |
| <u>RAB11FIP2</u> | 1 | 1 | 0 | 1 | 1 | 1 | 1 | 0 | 0 | 1 | 7 |
| <u>WDR37</u>     | 1 | 1 | 0 | 1 | 1 | 1 | 1 | 0 | 0 | 1 | 7 |
| <u>MTMR15</u>    | 1 | 1 | 1 | 1 | 0 | 0 | 1 | 1 | 0 | 1 | 7 |
| <u>USP33</u>     | 1 | 1 | 1 | 1 | 1 | 0 | 1 | 0 | 0 | 1 | 7 |
| <u>ENDOD1</u>    | 1 | 1 | 1 | 1 | 0 | 0 | 1 | 1 | 0 | 1 | 7 |
| <u>GPD1L</u>     | 1 | 1 | 1 | 1 | 1 | 0 | 1 | 0 | 0 | 1 | 7 |
| <u>METAP1</u>    | 1 | 1 | 1 | 1 | 0 | 0 | 1 | 0 | 1 | 1 | 7 |
| <u>TBC1D1</u>    | 1 | 1 | 1 | 1 | 1 | 0 | 1 | 0 | 0 | 1 | 7 |
| <u>SIN3B</u>     | 1 | 1 | 0 | 1 | 1 | 1 | 1 | 0 | 0 | 1 | 7 |
| <u>DNAJC13</u>   | 1 | 1 | 1 | 1 | 1 | 0 | 1 | 0 | 0 | 1 | 7 |
| <u>PHF15</u>     | 1 | 1 | 0 | 1 | 1 | 1 | 1 | 0 | 0 | 1 | 7 |
| <u>KIAA0999</u>  | 1 | 1 | 0 | 1 | 1 | 1 | 1 | 0 | 0 | 1 | 7 |
| <u>PHF3</u>      | 1 | 1 | 1 | 1 | 1 | 0 | 1 | 0 | 0 | 1 | 7 |
| <u>CBX7</u>      | 1 | 1 | 1 | 1 | 1 | 0 | 1 | 0 | 0 | 1 | 7 |
| <u>ZFYVE26</u>   | 1 | 1 | 1 | 1 | 0 | 0 | 1 | 0 | 1 | 1 | 7 |
| <u>TMEM131</u>   | 1 | 1 | 1 | 1 | 0 | 0 | 1 | 0 | 1 | 1 | 7 |
| <u>ATP6V1C2</u>  | 1 | 1 | 1 | 1 | 0 | 0 | 1 | 1 | 0 | 1 | 7 |
| <u>LYCAT</u>     | 1 | 0 | 1 | 1 | 1 | 1 | 1 | 0 | 0 | 1 | 7 |
| <u>CCDC75</u>    | 1 | 1 | 1 | 1 | 0 | 0 | 1 | 0 | 1 | 1 | 7 |
| <u>NAALADL2</u>  | 1 | 1 | 1 | 1 | 1 | 0 | 1 | 0 | 0 | 1 | 7 |
| <u>ABI3BP</u>    | 1 | 1 | 1 | 1 | 1 | 0 | 1 | 0 | 0 | 1 | 7 |
| <u>AHCTF1</u>    | 1 | 1 | 1 | 1 | 0 | 0 | 1 | 0 | 1 | 1 | 7 |
| <u>CNTNAP2</u>   | 1 | 1 | 0 | 1 | 1 | 1 | 1 | 0 | 0 | 1 | 7 |
| <u>WSB1</u>      | 1 | 1 | 0 | 1 | 1 | 0 | 1 | 0 | 1 | 1 | 7 |
| <u>LRRC32</u>    | 1 | 1 | 1 | 1 | 1 | 0 | 1 | 0 | 0 | 1 | 7 |
| <u>ARL5A</u>     | 1 | 1 | 1 | 1 | 1 | 0 | 1 | 0 | 0 | 1 | 7 |
| <u>GATM</u>      | 1 | 1 | 1 | 1 | 1 | 0 | 1 | 0 | 0 | 1 | 7 |
| <u>GREM1</u>     | 1 | 1 | 1 | 1 | 1 | 0 | 1 | 0 | 0 | 1 | 7 |
| <u>B4GALT1</u>   | 1 | 1 | 1 | 1 | 1 | 0 | 1 | 0 | 0 | 1 | 7 |
| <u>RABGEF1</u>   | 1 | 1 | 1 | 1 | 1 | 0 | 1 | 0 | 0 | 1 | 7 |
| <u>ZNF615</u>    | 1 | 1 | 1 | 1 | 1 | 0 | 1 | 0 | 0 | 1 | 7 |
| <u>GRIA2</u>     | 1 | 1 | 0 | 1 | 1 | 1 | 1 | 0 | 0 | 1 | 7 |
| <u>GRIK2</u>     | 1 | 1 | 0 | 1 | 1 | 1 | 1 | 0 | 0 | 1 | 7 |



|                  |   |   |   |   |   |   |   |   |   |   |   |
|------------------|---|---|---|---|---|---|---|---|---|---|---|
| <u>SLC25A4</u>   | 1 | 1 | 1 | 1 | 0 | 0 | 1 | 0 | 1 | 1 | 7 |
| <u>SENP1</u>     | 1 | 1 | 1 | 1 | 1 | 0 | 1 | 0 | 0 | 1 | 7 |
| <u>SCHIP1</u>    | 1 | 1 | 0 | 1 | 1 | 1 | 1 | 0 | 0 | 1 | 7 |
| <u>HMGB2</u>     | 1 | 0 | 1 | 1 | 0 | 0 | 1 | 1 | 1 | 1 | 7 |
| <u>HOXB5</u>     | 1 | 1 | 0 | 1 | 1 | 0 | 1 | 0 | 1 | 1 | 7 |
| <u>HOXC8</u>     | 1 | 1 | 1 | 1 | 1 | 0 | 1 | 0 | 0 | 1 | 7 |
| <u>CYR61</u>     | 1 | 1 | 1 | 1 | 1 | 0 | 1 | 0 | 0 | 1 | 7 |
| <u>IL1A</u>      | 1 | 1 | 1 | 1 | 1 | 0 | 1 | 0 | 0 | 1 | 7 |
| <u>ITGB8</u>     | 1 | 1 | 1 | 1 | 1 | 0 | 1 | 0 | 0 | 1 | 7 |
| <u>ZC3H6</u>     | 1 | 1 | 1 | 1 | 1 | 0 | 1 | 0 | 0 | 1 | 7 |
| <u>RANBP5</u>    | 1 | 1 | 1 | 1 | 0 | 0 | 1 | 1 | 0 | 1 | 7 |
| <u>LBR</u>       | 1 | 1 | 1 | 1 | 1 | 0 | 1 | 0 | 0 | 1 | 7 |
| <u>LPP</u>       | 1 | 1 | 1 | 1 | 1 | 0 | 1 | 0 | 0 | 1 | 7 |
| <u>MAP1A</u>     | 1 | 1 | 0 | 1 | 1 | 1 | 1 | 0 | 0 | 1 | 7 |
| <u>MARK1</u>     | 1 | 1 | 1 | 1 | 0 | 0 | 1 | 0 | 1 | 1 | 7 |
| <u>ADAM11</u>    | 1 | 1 | 1 | 1 | 1 | 0 | 1 | 0 | 0 | 1 | 7 |
| <u>MKLN1</u>     | 1 | 1 | 1 | 1 | 0 | 0 | 1 | 1 | 0 | 1 | 7 |
| <u>MAP3K10</u>   | 1 | 1 | 0 | 1 | 1 | 0 | 1 | 0 | 1 | 1 | 7 |
| <u>ATP2B1</u>    | 1 | 1 | 1 | 1 | 1 | 0 | 1 | 0 | 0 | 1 | 7 |
| <u>NTS</u>       | 1 | 1 | 1 | 1 | 0 | 0 | 1 | 0 | 1 | 1 | 7 |
| <u>CRIM1</u>     | 1 | 1 | 0 | 1 | 1 | 1 | 1 | 0 | 0 | 1 | 7 |
| <u>ZDHHC3</u>    | 1 | 1 | 0 | 1 | 1 | 1 | 1 | 0 | 0 | 1 | 7 |
| <u>C5orf5</u>    | 1 | 1 | 1 | 1 | 1 | 1 | 1 | 0 | 0 | 0 | 7 |
| <u>C14orf129</u> | 1 | 1 | 1 | 1 | 0 | 0 | 1 | 1 | 0 | 1 | 7 |
| <u>ENPP1</u>     | 1 | 1 | 1 | 1 | 0 | 0 | 1 | 0 | 1 | 1 | 7 |
| <u>NLK</u>       | 1 | 1 | 0 | 1 | 1 | 1 | 1 | 0 | 0 | 1 | 7 |
| <u>SLC26A4</u>   | 1 | 1 | 1 | 1 | 0 | 0 | 1 | 1 | 0 | 1 | 7 |
| <u>PEX13</u>     | 1 | 1 | 1 | 1 | 0 | 0 | 1 | 0 | 1 | 1 | 7 |
| <u>PKNOX1</u>    | 1 | 1 | 1 | 1 | 1 | 0 | 1 | 0 | 0 | 1 | 7 |
| <u>PLAG1</u>     | 1 | 0 | 1 | 1 | 1 | 1 | 1 | 0 | 0 | 1 | 7 |
| <u>PLS1</u>      | 1 | 1 | 0 | 1 | 1 | 0 | 1 | 0 | 1 | 1 | 7 |
| <u>ZNF280D</u>   | 1 | 1 | 0 | 1 | 1 | 0 | 1 | 0 | 1 | 1 | 7 |
| <u>FLJ20160</u>  | 1 | 1 | 1 | 1 | 1 | 0 | 1 | 0 | 0 | 1 | 7 |
| <u>SEMA4C</u>    | 1 | 1 | 0 | 1 | 1 | 0 | 1 | 1 | 0 | 1 | 7 |
| <u>FAM70A</u>    | 1 | 1 | 1 | 1 | 0 | 0 | 1 | 1 | 0 | 1 | 7 |
| <u>C8orf32</u>   | 1 | 1 | 1 | 1 | 0 | 0 | 1 | 1 | 0 | 1 | 7 |
| <u>TMEM16A</u>   | 1 | 1 | 1 | 1 | 1 | 0 | 1 | 0 | 0 | 1 | 7 |
| <u>PPP3R1</u>    | 0 | 1 | 1 | 1 | 1 | 1 | 1 | 0 | 0 | 1 | 7 |
| <u>PNRC2</u>     | 1 | 1 | 1 | 1 | 1 | 0 | 1 | 0 | 0 | 1 | 7 |
| <u>RBM22</u>     | 1 | 1 | 0 | 1 | 1 | 0 | 1 | 0 | 1 | 1 | 7 |
| <u>PCDHAC2</u>   | 0 | 1 | 1 | 1 | 1 | 1 | 1 | 0 | 0 | 1 | 7 |

|                 |   |   |   |   |   |   |   |   |   |   |   |
|-----------------|---|---|---|---|---|---|---|---|---|---|---|
| <u>PCDHAC1</u>  | 0 | 1 | 1 | 1 | 1 | 1 | 1 | 0 | 0 | 1 | 7 |
| <u>PCDHA10</u>  | 0 | 1 | 1 | 1 | 1 | 1 | 1 | 0 | 0 | 1 | 7 |
| <u>PCDHA5</u>   | 0 | 1 | 1 | 1 | 1 | 1 | 1 | 0 | 0 | 1 | 7 |
| <u>PCDHA2</u>   | 0 | 1 | 1 | 1 | 1 | 1 | 1 | 0 | 0 | 1 | 7 |
| <u>INPP5E</u>   | 1 | 1 | 1 | 1 | 1 | 0 | 1 | 0 | 0 | 1 | 7 |
| <u>PCNP</u>     | 1 | 1 | 1 | 1 | 1 | 0 | 1 | 0 | 0 | 1 | 7 |
| <u>TBC1D14</u>  | 1 | 1 | 1 | 1 | 0 | 0 | 1 | 1 | 0 | 1 | 7 |
| <u>ARRDC3</u>   | 1 | 1 | 0 | 1 | 1 | 1 | 1 | 0 | 0 | 1 | 7 |
| <u>SEMA4G</u>   | 1 | 1 | 1 | 1 | 1 | 0 | 1 | 0 | 0 | 1 | 7 |
| <u>DMRT3</u>    | 1 | 1 | 0 | 1 | 0 | 0 | 1 | 1 | 1 | 1 | 7 |
| <u>RAP2A</u>    | 1 | 1 | 1 | 1 | 0 | 0 | 1 | 1 | 0 | 1 | 7 |
| <u>RBBP7</u>    | 1 | 1 | 1 | 1 | 1 | 0 | 1 | 0 | 0 | 1 | 7 |
| <u>BACH2</u>    | 1 | 1 | 0 | 1 | 1 | 1 | 1 | 0 | 0 | 1 | 7 |
| <u>RPE65</u>    | 1 | 1 | 1 | 1 | 0 | 0 | 1 | 0 | 1 | 1 | 7 |
| <u>RPS6KB1</u>  | 1 | 1 | 1 | 1 | 0 | 0 | 1 | 1 | 0 | 1 | 7 |
| <u>CLIP1</u>    | 1 | 1 | 1 | 1 | 1 | 0 | 1 | 0 | 0 | 1 | 7 |
| <u>ATXN1</u>    | 1 | 0 | 1 | 1 | 1 | 1 | 1 | 0 | 0 | 1 | 7 |
| <u>FNDC3B</u>   | 1 | 1 | 1 | 1 | 1 | 0 | 1 | 0 | 0 | 1 | 7 |
| <u>DEPDC6</u>   | 1 | 1 | 1 | 1 | 0 | 0 | 1 | 1 | 0 | 1 | 7 |
| <u>TMEM135</u>  | 1 | 1 | 1 | 1 | 0 | 0 | 1 | 1 | 0 | 1 | 7 |
| <u>SLC3A1</u>   | 1 | 1 | 1 | 1 | 0 | 0 | 1 | 0 | 1 | 1 | 7 |
| <u>CAPRIN2</u>  | 1 | 1 | 1 | 1 | 0 | 0 | 1 | 0 | 1 | 1 | 7 |
| <u>MTMR9</u>    | 1 | 1 | 1 | 1 | 0 | 0 | 1 | 1 | 0 | 1 | 7 |
| <u>SON</u>      | 0 | 1 | 0 | 1 | 1 | 1 | 1 | 1 | 1 | 0 | 7 |
| <u>ZFP36L1</u>  | 0 | 1 | 1 | 1 | 1 | 1 | 1 | 0 | 0 | 1 | 7 |
| <u>UBE2B</u>    | 1 | 1 | 1 | 1 | 1 | 0 | 1 | 0 | 0 | 1 | 7 |
| <u>UBP1</u>     | 1 | 0 | 1 | 1 | 1 | 1 | 1 | 0 | 0 | 1 | 7 |
| <u>ZIC1</u>     | 1 | 0 | 0 | 1 | 1 | 1 | 1 | 1 | 0 | 1 | 7 |
| <u>DERL1</u>    | 1 | 1 | 1 | 1 | 1 | 0 | 1 | 0 | 0 | 1 | 7 |
| <u>SMC6</u>     | 1 | 1 | 0 | 1 | 0 | 0 | 1 | 1 | 1 | 1 | 7 |
| <u>LIN28</u>    | 1 | 1 | 1 | 1 | 1 | 0 | 1 | 0 | 0 | 1 | 7 |
| <u>CALM1</u>    | 1 | 1 | 1 | 1 | 0 | 0 | 1 | 1 | 0 | 1 | 7 |
| <u>THOC7</u>    | 1 | 1 | 1 | 1 | 0 | 0 | 1 | 0 | 1 | 1 | 7 |
| <u>CAMK2G</u>   | 1 | 1 | 0 | 1 | 1 | 1 | 1 | 0 | 0 | 1 | 7 |
| <u>SPRY4</u>    | 1 | 0 | 1 | 1 | 1 | 1 | 1 | 0 | 0 | 1 | 7 |
| <u>SNN</u>      | 1 | 1 | 0 | 1 | 1 | 1 | 1 | 0 | 0 | 1 | 7 |
| <u>FZD4</u>     | 1 | 1 | 0 | 1 | 1 | 0 | 1 | 1 | 0 | 1 | 7 |
| <u>C11orf56</u> | 1 | 1 | 1 | 1 | 1 | 0 | 1 | 0 | 0 | 1 | 7 |
| <u>MEX3B</u>    | 1 | 1 | 0 | 1 | 1 | 1 | 1 | 0 | 0 | 1 | 7 |
| <u>CARD11</u>   | 1 | 1 | 0 | 1 | 1 | 0 | 1 | 0 | 1 | 1 | 7 |
| <u>MEGF10</u>   | 1 | 1 | 1 | 1 | 0 | 0 | 1 | 1 | 0 | 1 | 7 |

|                 |   |   |   |   |   |   |   |   |   |   |   |
|-----------------|---|---|---|---|---|---|---|---|---|---|---|
| <u>CDC42BPA</u> | 1 | 1 | 1 | 1 | 1 | 0 | 1 | 0 | 0 | 1 | 7 |
| <u>ADO</u>      | 1 | 1 | 1 | 1 | 1 | 0 | 1 | 0 | 0 | 1 | 7 |
| <u>FAM73B</u>   | 1 | 1 | 0 | 1 | 1 | 0 | 1 | 1 | 0 | 1 | 7 |
| <u>BHLHB2</u>   | 1 | 1 | 1 | 1 | 1 | 0 | 1 | 0 | 0 | 1 | 7 |
| <u>EED</u>      | 1 | 1 | 1 | 1 | 1 | 0 | 1 | 0 | 0 | 1 | 7 |
| <u>PER2</u>     | 1 | 1 | 0 | 1 | 1 | 0 | 1 | 1 | 0 | 1 | 7 |
| <u>PHOX2B</u>   | 1 | 1 | 0 | 1 | 1 | 1 | 1 | 0 | 0 | 1 | 7 |
| <u>LONRF1</u>   | 1 | 1 | 1 | 1 | 1 | 0 | 1 | 0 | 0 | 1 | 7 |
| <u>YTHDC1</u>   | 1 | 1 | 1 | 1 | 0 | 0 | 1 | 1 | 0 | 1 | 7 |
| <u>CD4</u>      | 1 | 1 | 1 | 1 | 1 | 0 | 1 | 0 | 0 | 1 | 7 |
| <u>LMBRD2</u>   | 1 | 1 | 1 | 1 | 0 | 0 | 1 | 0 | 1 | 1 | 7 |
| <u>DLGAP2</u>   | 1 | 1 | 1 | 1 | 0 | 0 | 1 | 1 | 0 | 1 | 7 |
| <u>AKAP6</u>    | 1 | 1 | 1 | 1 | 1 | 0 | 1 | 0 | 0 | 1 | 7 |
| <u>ATG5</u>     | 1 | 1 | 1 | 1 | 1 | 0 | 1 | 0 | 0 | 1 | 7 |
| <u>ENTPD6</u>   | 1 | 1 | 1 | 1 | 0 | 0 | 1 | 1 | 0 | 1 | 7 |
| <u>CLOCK</u>    | 1 | 1 | 0 | 1 | 1 | 1 | 1 | 1 | 0 | 0 | 7 |
| <u>GDA</u>      | 1 | 1 | 1 | 1 | 0 | 0 | 1 | 1 | 0 | 1 | 7 |
| <u>SEC24C</u>   | 1 | 0 | 1 | 1 | 1 | 1 | 1 | 0 | 0 | 1 | 7 |
| <u>DAZAP2</u>   | 1 | 0 | 1 | 1 | 1 | 0 | 1 | 0 | 1 | 1 | 7 |
| <u>TSC22D2</u>  | 1 | 1 | 1 | 1 | 1 | 0 | 1 | 0 | 0 | 1 | 7 |
| <u>MELK</u>     | 1 | 1 | 1 | 1 | 0 | 0 | 1 | 0 | 1 | 1 | 7 |
| <u>ZC3H11A</u>  | 1 | 1 | 0 | 1 | 0 | 0 | 1 | 1 | 1 | 1 | 7 |
| <u>LPPR4</u>    | 1 | 1 | 0 | 1 | 1 | 1 | 1 | 0 | 0 | 1 | 7 |
| <u>KIAA0196</u> | 1 | 1 | 1 | 1 | 0 | 0 | 1 | 0 | 1 | 1 | 7 |
| <u>ARNT2</u>    | 1 | 1 | 0 | 1 | 1 | 1 | 1 | 0 | 0 | 1 | 7 |
| <u>E2F7</u>     | 1 | 1 | 1 | 0 | 1 | 1 | 1 | 0 | 0 | 1 | 7 |
| <u>C3orf59</u>  | 1 | 1 | 1 | 0 | 1 | 1 | 1 | 0 | 0 | 1 | 7 |
| <u>FLJ38973</u> | 1 | 1 | 1 | 0 | 1 | 0 | 1 | 1 | 0 | 1 | 7 |
| <u>PLCL2</u>    | 1 | 1 | 0 | 0 | 1 | 1 | 1 | 0 | 1 | 1 | 7 |
| <u>INPP5A</u>   | 1 | 1 | 1 | 0 | 1 | 1 | 1 | 0 | 0 | 1 | 7 |
| <u>KPNB1</u>    | 1 | 1 | 1 | 0 | 1 | 1 | 1 | 0 | 0 | 1 | 7 |
| <u>NPC1</u>     | 1 | 1 | 0 | 0 | 1 | 0 | 1 | 1 | 1 | 1 | 7 |
| <u>PAM</u>      | 1 | 1 | 1 | 0 | 1 | 1 | 1 | 0 | 0 | 1 | 7 |
| <u>ST8SIA4</u>  | 1 | 1 | 1 | 0 | 1 | 1 | 1 | 0 | 0 | 1 | 7 |
| <u>ATRN</u>     | 1 | 1 | 1 | 0 | 1 | 0 | 1 | 1 | 0 | 1 | 7 |
| <u>CDH13</u>    | 1 | 1 | 0 | 1 | 1 | 1 | 0 | 0 | 0 | 1 | 6 |
| <u>IGF2BP2</u>  | 1 | 1 | 0 | 1 | 1 | 1 | 0 | 0 | 0 | 1 | 6 |
| <u>CUGBP2</u>   | 1 | 1 | 0 | 1 | 1 | 1 | 0 | 0 | 0 | 1 | 6 |
| <u>ADCY1</u>    | 1 | 1 | 0 | 1 | 1 | 1 | 0 | 0 | 0 | 1 | 6 |
| <u>TCERG1</u>   | 1 | 1 | 0 | 1 | 1 | 1 | 0 | 0 | 0 | 1 | 6 |
| <u>ADAMTS6</u>  | 1 | 1 | 0 | 1 | 1 | 1 | 0 | 0 | 0 | 1 | 6 |

|                  |   |   |   |   |   |   |   |   |   |   |   |
|------------------|---|---|---|---|---|---|---|---|---|---|---|
| <u>SLITRK1</u>   | 1 | 1 | 0 | 1 | 1 | 1 | 0 | 0 | 0 | 1 | 6 |
| <u>SSX2IP</u>    | 1 | 1 | 0 | 1 | 1 | 1 | 0 | 0 | 0 | 1 | 6 |
| <u>CNR1</u>      | 1 | 1 | 0 | 1 | 1 | 1 | 0 | 0 | 0 | 1 | 6 |
| <u>CPEB2</u>     | 1 | 1 | 0 | 1 | 1 | 1 | 0 | 0 | 0 | 1 | 6 |
| <u>ADM</u>       | 1 | 1 | 0 | 1 | 1 | 1 | 0 | 0 | 0 | 1 | 6 |
| <u>CREB1</u>     | 1 | 1 | 0 | 1 | 1 | 1 | 0 | 0 | 0 | 1 | 6 |
| <u>RNF145</u>    | 1 | 1 | 0 | 1 | 1 | 1 | 0 | 0 | 0 | 1 | 6 |
| <u>ZNF800</u>    | 1 | 1 | 0 | 1 | 1 | 1 | 0 | 0 | 0 | 1 | 6 |
| <u>ADAMTS18</u>  | 1 | 1 | 0 | 1 | 1 | 1 | 0 | 0 | 0 | 1 | 6 |
| <u>DPYSL2</u>    | 1 | 1 | 0 | 1 | 1 | 1 | 0 | 0 | 0 | 1 | 6 |
| <u>E2F5</u>      | 1 | 1 | 0 | 1 | 1 | 1 | 0 | 0 | 0 | 1 | 6 |
| <u>EIF4A2</u>    | 1 | 1 | 0 | 1 | 1 | 1 | 0 | 0 | 0 | 1 | 6 |
| <u>EN2</u>       | 1 | 1 | 0 | 1 | 1 | 1 | 0 | 0 | 0 | 1 | 6 |
| <u>EPHA4</u>     | 1 | 1 | 0 | 1 | 1 | 1 | 0 | 0 | 0 | 1 | 6 |
| <u>ETV6</u>      | 1 | 1 | 0 | 1 | 1 | 1 | 0 | 0 | 0 | 1 | 6 |
| <u>EYA1</u>      | 1 | 1 | 0 | 1 | 1 | 1 | 0 | 0 | 0 | 1 | 6 |
| <u>BPTF</u>      | 1 | 1 | 0 | 1 | 1 | 1 | 0 | 0 | 0 | 1 | 6 |
| <u>JAZF1</u>     | 1 | 1 | 0 | 1 | 1 | 1 | 0 | 0 | 0 | 1 | 6 |
| <u>C7orf41</u>   | 1 | 1 | 0 | 1 | 1 | 1 | 0 | 0 | 0 | 1 | 6 |
| <u>RAB11FIP2</u> | 1 | 1 | 0 | 1 | 1 | 1 | 0 | 0 | 0 | 1 | 6 |
| <u>WDR37</u>     | 1 | 1 | 0 | 1 | 1 | 1 | 0 | 0 | 0 | 1 | 6 |
| <u>BTBD3</u>     | 1 | 1 | 0 | 1 | 1 | 1 | 0 | 0 | 0 | 1 | 6 |
| <u>HIC2</u>      | 1 | 1 | 0 | 1 | 1 | 1 | 0 | 0 | 0 | 1 | 6 |
| <u>KANK1</u>     | 1 | 1 | 0 | 1 | 1 | 1 | 0 | 0 | 0 | 1 | 6 |
| <u>SIN3B</u>     | 1 | 1 | 0 | 1 | 1 | 1 | 0 | 0 | 0 | 1 | 6 |
| <u>PHF15</u>     | 1 | 1 | 0 | 1 | 1 | 1 | 0 | 0 | 0 | 1 | 6 |
| <u>KIAA0999</u>  | 1 | 1 | 0 | 1 | 1 | 1 | 0 | 0 | 0 | 1 | 6 |
| <u>SIRT1</u>     | 1 | 1 | 0 | 1 | 1 | 1 | 0 | 0 | 0 | 1 | 6 |
| <u>FOS</u>       | 1 | 1 | 0 | 1 | 1 | 1 | 0 | 0 | 0 | 1 | 6 |
| <u>LEMD3</u>     | 1 | 1 | 0 | 1 | 1 | 1 | 0 | 0 | 0 | 1 | 6 |
| <u>BRD1</u>      | 1 | 1 | 0 | 1 | 1 | 1 | 0 | 0 | 0 | 1 | 6 |
| <u>LYCAT</u>     | 1 | 1 | 0 | 1 | 1 | 1 | 0 | 0 | 0 | 1 | 6 |
| <u>NIPBL</u>     | 1 | 1 | 0 | 1 | 1 | 1 | 0 | 0 | 0 | 1 | 6 |
| <u>OSBPL3</u>    | 1 | 1 | 0 | 1 | 1 | 1 | 0 | 0 | 0 | 1 | 6 |
| <u>SS18L1</u>    | 1 | 1 | 0 | 1 | 1 | 1 | 0 | 0 | 0 | 1 | 6 |
| <u>CNTNAP2</u>   | 1 | 1 | 0 | 1 | 1 | 1 | 0 | 0 | 0 | 1 | 6 |
| <u>EPC2</u>      | 1 | 1 | 0 | 1 | 1 | 1 | 0 | 0 | 0 | 1 | 6 |
| <u>GAPVD1</u>    | 1 | 1 | 0 | 1 | 1 | 1 | 0 | 0 | 0 | 1 | 6 |
| <u>GATA6</u>     | 1 | 1 | 0 | 1 | 1 | 1 | 0 | 0 | 0 | 1 | 6 |
| <u>NR6A1</u>     | 1 | 1 | 0 | 1 | 1 | 1 | 0 | 0 | 0 | 1 | 6 |
| <u>NPTN</u>      | 1 | 1 | 0 | 1 | 1 | 1 | 0 | 0 | 0 | 1 | 6 |

|                  |   |   |   |   |   |   |   |   |   |   |   |
|------------------|---|---|---|---|---|---|---|---|---|---|---|
| <u>FOXP1</u>     | 1 | 1 | 0 | 1 | 1 | 1 | 0 | 0 | 0 | 1 | 6 |
| <u>GLS</u>       | 1 | 1 | 0 | 1 | 1 | 1 | 0 | 0 | 0 | 1 | 6 |
| <u>GRIA2</u>     | 1 | 1 | 0 | 1 | 1 | 1 | 0 | 0 | 0 | 1 | 6 |
| <u>GRIK2</u>     | 1 | 1 | 0 | 1 | 1 | 1 | 0 | 0 | 0 | 1 | 6 |
| <u>GRIK2</u>     | 1 | 1 | 0 | 1 | 1 | 1 | 0 | 0 | 0 | 1 | 6 |
| <u>KLF15</u>     | 1 | 1 | 0 | 1 | 1 | 1 | 0 | 0 | 0 | 1 | 6 |
| <u>LRP12</u>     | 1 | 1 | 0 | 1 | 1 | 1 | 0 | 0 | 0 | 1 | 6 |
| <u>SCHIP1</u>    | 1 | 1 | 0 | 1 | 1 | 1 | 0 | 0 | 0 | 1 | 6 |
| <u>BAZ2B</u>     | 1 | 1 | 0 | 1 | 1 | 1 | 0 | 0 | 0 | 1 | 6 |
| <u>HLF</u>       | 1 | 1 | 0 | 1 | 1 | 1 | 0 | 0 | 0 | 1 | 6 |
| <u>HOXA11</u>    | 1 | 1 | 0 | 1 | 1 | 1 | 0 | 0 | 0 | 1 | 6 |
| <u>ID4</u>       | 1 | 1 | 0 | 1 | 1 | 1 | 0 | 0 | 0 | 1 | 6 |
| <u>JARID2</u>    | 1 | 1 | 0 | 1 | 1 | 1 | 0 | 0 | 0 | 1 | 6 |
| <u>KRAS</u>      | 1 | 1 | 0 | 1 | 1 | 1 | 0 | 0 | 0 | 1 | 6 |
| <u>KRAS</u>      | 1 | 1 | 0 | 1 | 1 | 1 | 0 | 0 | 0 | 1 | 6 |
| <u>LIN28B</u>    | 1 | 1 | 0 | 1 | 1 | 1 | 0 | 0 | 0 | 1 | 6 |
| <u>LMO1</u>      | 1 | 1 | 0 | 1 | 1 | 1 | 0 | 0 | 0 | 1 | 6 |
| <u>MAP1A</u>     | 1 | 1 | 0 | 1 | 1 | 1 | 0 | 0 | 0 | 1 | 6 |
| <u>MAP1B</u>     | 1 | 1 | 0 | 1 | 1 | 1 | 0 | 0 | 0 | 1 | 6 |
| <u>MAP3K3</u>    | 1 | 1 | 0 | 1 | 1 | 1 | 0 | 0 | 0 | 1 | 6 |
| <u>NOVA1</u>     | 1 | 1 | 0 | 1 | 1 | 1 | 0 | 0 | 0 | 1 | 6 |
| <u>ATP2B2</u>    | 1 | 1 | 0 | 1 | 1 | 1 | 0 | 0 | 0 | 1 | 6 |
| <u>PBX3</u>      | 1 | 1 | 0 | 1 | 1 | 1 | 0 | 0 | 0 | 1 | 6 |
| <u>PHF20L1</u>   | 1 | 1 | 0 | 1 | 1 | 1 | 0 | 0 | 0 | 1 | 6 |
| <u>CRIM1</u>     | 1 | 1 | 0 | 1 | 1 | 1 | 0 | 0 | 0 | 1 | 6 |
| <u>ZDHHC3</u>    | 1 | 1 | 0 | 1 | 1 | 1 | 0 | 0 | 0 | 1 | 6 |
| <u>PDGFRA</u>    | 1 | 1 | 0 | 1 | 1 | 1 | 0 | 0 | 0 | 1 | 6 |
| <u>HECA</u>      | 1 | 1 | 0 | 1 | 1 | 1 | 0 | 0 | 0 | 1 | 6 |
| <u>NLK</u>       | 1 | 1 | 0 | 1 | 1 | 1 | 0 | 0 | 0 | 1 | 6 |
| <u>SLC38A2</u>   | 1 | 1 | 0 | 1 | 1 | 1 | 0 | 0 | 0 | 1 | 6 |
| <u>INOC1</u>     | 1 | 1 | 0 | 1 | 1 | 1 | 0 | 0 | 0 | 1 | 6 |
| <u>AFTPH</u>     | 1 | 1 | 0 | 1 | 1 | 1 | 0 | 0 | 0 | 1 | 6 |
| <u>PPP1CB</u>    | 1 | 1 | 0 | 1 | 1 | 1 | 0 | 0 | 0 | 1 | 6 |
| <u>PPP2R2C</u>   | 1 | 1 | 0 | 1 | 1 | 1 | 0 | 0 | 0 | 1 | 6 |
| <u>PI4K2B</u>    | 1 | 1 | 0 | 1 | 1 | 1 | 0 | 0 | 0 | 1 | 6 |
| <u>CHD7</u>      | 1 | 1 | 0 | 1 | 1 | 1 | 0 | 0 | 0 | 1 | 6 |
| <u>PRKCD</u>     | 1 | 1 | 0 | 1 | 1 | 1 | 0 | 0 | 0 | 1 | 6 |
| <u>PRKCE</u>     | 1 | 1 | 0 | 1 | 1 | 1 | 0 | 0 | 0 | 1 | 6 |
| <u>LMO3</u>      | 1 | 1 | 0 | 1 | 1 | 1 | 0 | 0 | 0 | 1 | 6 |
| <u>CTTNBP2NL</u> | 1 | 1 | 0 | 1 | 1 | 1 | 0 | 0 | 0 | 1 | 6 |
| <u>PCDHA6</u>    | 1 | 1 | 0 | 1 | 1 | 1 | 0 | 0 | 0 | 1 | 6 |

|                 |   |   |   |   |   |   |   |   |   |   |   |
|-----------------|---|---|---|---|---|---|---|---|---|---|---|
| <u>PCDHA6</u>   | 1 | 1 | 0 | 1 | 1 | 1 | 0 | 0 | 0 | 1 | 6 |
| <u>TM9SF3</u>   | 1 | 1 | 0 | 1 | 1 | 1 | 0 | 0 | 0 | 1 | 6 |
| <u>ARRDC3</u>   | 1 | 1 | 0 | 1 | 1 | 1 | 0 | 0 | 0 | 1 | 6 |
| <u>LRRN1</u>    | 1 | 1 | 0 | 1 | 1 | 1 | 0 | 0 | 0 | 1 | 6 |
| <u>BAI3</u>     | 1 | 1 | 0 | 1 | 1 | 1 | 0 | 0 | 0 | 1 | 6 |
| <u>RAD21</u>    | 1 | 1 | 0 | 1 | 1 | 1 | 0 | 0 | 0 | 1 | 6 |
| <u>RLF</u>      | 1 | 1 | 0 | 1 | 1 | 1 | 0 | 0 | 0 | 1 | 6 |
| <u>BCL6</u>     | 1 | 1 | 0 | 1 | 1 | 1 | 0 | 0 | 0 | 1 | 6 |
| <u>BACH2</u>    | 1 | 1 | 0 | 1 | 1 | 1 | 0 | 0 | 0 | 1 | 6 |
| <u>SEL1L</u>    | 1 | 1 | 0 | 1 | 1 | 1 | 0 | 0 | 0 | 1 | 6 |
| <u>MPP5</u>     | 1 | 1 | 0 | 1 | 1 | 1 | 0 | 0 | 0 | 1 | 6 |
| <u>SOX5</u>     | 1 | 1 | 0 | 1 | 1 | 1 | 0 | 0 | 0 | 1 | 6 |
| <u>TIMP3</u>    | 1 | 1 | 0 | 1 | 1 | 1 | 0 | 0 | 0 | 1 | 6 |
| <u>YWHAG</u>    | 1 | 1 | 0 | 1 | 1 | 1 | 0 | 0 | 0 | 1 | 6 |
| <u>ZIC2</u>     | 1 | 1 | 0 | 1 | 1 | 1 | 0 | 0 | 0 | 1 | 6 |
| <u>ZIC3</u>     | 1 | 1 | 0 | 1 | 1 | 1 | 0 | 0 | 0 | 1 | 6 |
| <u>C17orf39</u> | 1 | 1 | 0 | 1 | 1 | 1 | 0 | 0 | 0 | 1 | 6 |
| <u>ARSJ</u>     | 1 | 1 | 0 | 1 | 1 | 1 | 0 | 0 | 0 | 1 | 6 |
| <u>NR4A3</u>    | 1 | 1 | 0 | 1 | 1 | 1 | 0 | 0 | 0 | 1 | 6 |
| <u>CHD9</u>     | 1 | 1 | 0 | 1 | 1 | 1 | 0 | 0 | 0 | 1 | 6 |
| <u>NAT13</u>    | 1 | 1 | 0 | 1 | 1 | 1 | 0 | 0 | 0 | 1 | 6 |
| <u>CPEB4</u>    | 1 | 1 | 0 | 1 | 1 | 1 | 0 | 0 | 0 | 1 | 6 |
| <u>ANKRD13C</u> | 1 | 1 | 0 | 1 | 1 | 1 | 0 | 0 | 0 | 1 | 6 |
| <u>C6orf62</u>  | 1 | 1 | 0 | 1 | 1 | 1 | 0 | 0 | 0 | 1 | 6 |
| <u>CAMK2G</u>   | 1 | 1 | 0 | 1 | 1 | 1 | 0 | 0 | 0 | 1 | 6 |
| <u>SNN</u>      | 1 | 1 | 0 | 1 | 1 | 1 | 0 | 0 | 0 | 1 | 6 |
| <u>MEX3B</u>    | 1 | 1 | 0 | 1 | 1 | 1 | 0 | 0 | 0 | 1 | 6 |
| <u>CUL3</u>     | 1 | 1 | 0 | 1 | 1 | 1 | 0 | 0 | 0 | 1 | 6 |
| <u>PIK3R3</u>   | 1 | 1 | 0 | 1 | 1 | 1 | 0 | 0 | 0 | 1 | 6 |
| <u>DOCK7</u>    | 1 | 1 | 0 | 1 | 1 | 1 | 0 | 0 | 0 | 1 | 6 |
| <u>RUNX1</u>    | 1 | 1 | 0 | 1 | 1 | 1 | 0 | 0 | 0 | 1 | 6 |
| <u>IRS2</u>     | 1 | 1 | 0 | 1 | 1 | 1 | 0 | 0 | 0 | 1 | 6 |
| <u>CBLB</u>     | 1 | 1 | 0 | 1 | 1 | 1 | 0 | 0 | 0 | 1 | 6 |
| <u>PCAF</u>     | 1 | 1 | 0 | 1 | 1 | 1 | 0 | 0 | 0 | 1 | 6 |
| <u>PHOX2B</u>   | 1 | 1 | 0 | 1 | 1 | 1 | 0 | 0 | 0 | 1 | 6 |
| <u>ACVR2A</u>   | 1 | 1 | 0 | 1 | 1 | 1 | 0 | 0 | 0 | 1 | 6 |
| <u>DCLK1</u>    | 1 | 1 | 0 | 1 | 1 | 1 | 0 | 0 | 0 | 1 | 6 |
| <u>NRXN1</u>    | 1 | 1 | 0 | 1 | 1 | 1 | 0 | 0 | 0 | 1 | 6 |
| <u>NMT2</u>     | 1 | 1 | 0 | 1 | 1 | 1 | 0 | 0 | 0 | 1 | 6 |
| <u>CDYL</u>     | 1 | 1 | 0 | 1 | 1 | 1 | 0 | 0 | 0 | 1 | 6 |
| <u>AKAP7</u>    | 1 | 1 | 0 | 1 | 1 | 1 | 0 | 0 | 0 | 1 | 6 |

|                 |   |   |   |   |   |   |   |   |   |   |   |
|-----------------|---|---|---|---|---|---|---|---|---|---|---|
| <u>TBPL1</u>    | 1 | 1 | 0 | 1 | 1 | 1 | 0 | 0 | 0 | 1 | 6 |
| <u>NPEPPS</u>   | 1 | 1 | 0 | 1 | 1 | 1 | 0 | 0 | 0 | 1 | 6 |
| <u>SEC24C</u>   | 1 | 1 | 0 | 1 | 1 | 1 | 0 | 0 | 0 | 1 | 6 |
| <u>TOX</u>      | 1 | 1 | 0 | 1 | 1 | 1 | 0 | 0 | 0 | 1 | 6 |
| <u>LRBA</u>     | 1 | 1 | 0 | 1 | 1 | 1 | 0 | 0 | 0 | 1 | 6 |
| <u>LPPR4</u>    | 1 | 1 | 0 | 1 | 1 | 1 | 0 | 0 | 0 | 1 | 6 |
| <u>G3BP2</u>    | 1 | 1 | 0 | 1 | 1 | 1 | 0 | 0 | 0 | 1 | 6 |
| <u>ARNT2</u>    | 1 | 1 | 0 | 1 | 1 | 1 | 0 | 0 | 0 | 1 | 6 |
| <u>CDH2</u>     | 1 | 1 | 0 | 1 | 1 | 1 | 1 | 0 | 0 | 0 | 6 |
| <u>AKT3</u>     | 1 | 1 | 0 | 1 | 1 | 0 | 1 | 0 | 0 | 1 | 6 |
| <u>ABI1</u>     | 1 | 0 | 1 | 1 | 0 | 0 | 1 | 0 | 1 | 1 | 6 |
| <u>ZBTB33</u>   | 1 | 1 | 0 | 1 | 0 | 0 | 1 | 1 | 0 | 1 | 6 |
| <u>BCL2L11</u>  | 1 | 1 | 0 | 1 | 1 | 0 | 1 | 0 | 0 | 1 | 6 |
| <u>SH2B3</u>    | 1 | 1 | 1 | 1 | 0 | 0 | 1 | 0 | 0 | 1 | 6 |
| <u>CLEC3A</u>   | 1 | 1 | 1 | 1 | 0 | 0 | 1 | 0 | 0 | 1 | 6 |
| <u>FAM13A1</u>  | 1 | 1 | 0 | 1 | 0 | 0 | 1 | 1 | 0 | 1 | 6 |
| <u>MBNL2</u>    | 1 | 1 | 0 | 1 | 1 | 0 | 1 | 0 | 0 | 1 | 6 |
| <u>CALCRL</u>   | 1 | 1 | 1 | 1 | 0 | 0 | 1 | 0 | 0 | 1 | 6 |
| <u>TRIM13</u>   | 1 | 0 | 0 | 1 | 1 | 1 | 1 | 1 | 0 | 0 | 6 |
| <u>CDK8</u>     | 1 | 1 | 0 | 1 | 0 | 0 | 1 | 0 | 1 | 1 | 6 |
| <u>CDKN1B</u>   | 1 | 1 | 0 | 1 | 0 | 0 | 1 | 0 | 1 | 1 | 6 |
| <u>PRSS16</u>   | 1 | 1 | 1 | 1 | 0 | 0 | 1 | 0 | 0 | 1 | 6 |
| <u>PIAS3</u>    | 1 | 1 | 0 | 1 | 1 | 0 | 1 | 0 | 0 | 1 | 6 |
| <u>TIMM17A</u>  | 1 | 1 | 1 | 1 | 0 | 0 | 1 | 0 | 0 | 1 | 6 |
| <u>SLC9A6</u>   | 1 | 1 | 1 | 1 | 0 | 0 | 1 | 0 | 0 | 1 | 6 |
| <u>ENOX2</u>    | 1 | 1 | 0 | 1 | 0 | 0 | 1 | 0 | 1 | 1 | 6 |
| <u>SEMA3C</u>   | 1 | 1 | 1 | 1 | 0 | 0 | 1 | 0 | 0 | 1 | 6 |
| <u>NEBL</u>     | 1 | 1 | 1 | 1 | 0 | 0 | 1 | 0 | 0 | 1 | 6 |
| <u>PROCR</u>    | 1 | 1 | 1 | 1 | 0 | 0 | 1 | 0 | 0 | 1 | 6 |
| <u>SLC19A2</u>  | 1 | 1 | 1 | 1 | 0 | 0 | 1 | 0 | 0 | 1 | 6 |
| <u>TRIM3</u>    | 1 | 0 | 0 | 1 | 0 | 0 | 1 | 1 | 1 | 1 | 6 |
| <u>POLR3G</u>   | 1 | 1 | 1 | 1 | 0 | 0 | 1 | 0 | 0 | 1 | 6 |
| <u>EXOC5</u>    | 1 | 1 | 1 | 1 | 0 | 0 | 1 | 0 | 0 | 1 | 6 |
| <u>CUGBP2</u>   | 1 | 1 | 0 | 1 | 1 | 1 | 0 | 0 | 0 | 1 | 6 |
| <u>FUT9</u>     | 1 | 1 | 1 | 1 | 0 | 0 | 1 | 0 | 0 | 1 | 6 |
| <u>CETN3</u>    | 1 | 1 | 1 | 1 | 0 | 0 | 1 | 0 | 0 | 1 | 6 |
| <u>POLQ</u>     | 1 | 1 | 1 | 1 | 0 | 0 | 1 | 0 | 0 | 1 | 6 |
| <u>SIX2</u>     | 1 | 1 | 0 | 1 | 1 | 0 | 1 | 0 | 0 | 1 | 6 |
| <u>ADAM28</u>   | 1 | 1 | 1 | 1 | 0 | 0 | 1 | 0 | 0 | 1 | 6 |
| <u>GPR83</u>    | 1 | 1 | 1 | 1 | 0 | 0 | 1 | 0 | 0 | 1 | 6 |
| <u>PPARGC1A</u> | 1 | 1 | 0 | 1 | 1 | 1 | 1 | 0 | 0 | 0 | 6 |

|                  |   |   |   |   |   |   |   |   |   |   |   |
|------------------|---|---|---|---|---|---|---|---|---|---|---|
| <u>MALT1</u>     | 1 | 1 | 0 | 1 | 0 | 0 | 1 | 1 | 0 | 1 | 6 |
| <u>SPIN1</u>     | 1 | 1 | 1 | 1 | 0 | 0 | 1 | 0 | 0 | 1 | 6 |
| <u>PRDX3</u>     | 1 | 1 | 1 | 1 | 0 | 0 | 1 | 0 | 0 | 1 | 6 |
| <u>RAB40B</u>    | 1 | 1 | 1 | 1 | 0 | 0 | 1 | 0 | 0 | 1 | 6 |
| <u>KIF2C</u>     | 1 | 1 | 0 | 1 | 0 | 0 | 1 | 0 | 1 | 1 | 6 |
| <u>NUDT21</u>    | 1 | 1 | 1 | 1 | 0 | 0 | 1 | 0 | 0 | 1 | 6 |
| <u>RAPGEF4</u>   | 1 | 1 | 1 | 1 | 0 | 0 | 1 | 0 | 0 | 1 | 6 |
| <u>ADAMTS5</u>   | 1 | 1 | 1 | 1 | 0 | 0 | 1 | 0 | 0 | 1 | 6 |
| <u>PRDM4</u>     | 1 | 1 | 1 | 1 | 0 | 0 | 1 | 0 | 0 | 1 | 6 |
| <u>KIF3A</u>     | 1 | 1 | 1 | 1 | 0 | 0 | 1 | 0 | 0 | 1 | 6 |
| <u>BAZ2A</u>     | 1 | 1 | 0 | 1 | 1 | 0 | 1 | 0 | 0 | 1 | 6 |
| <u>ZNF277</u>    | 1 | 1 | 1 | 1 | 0 | 0 | 1 | 0 | 0 | 1 | 6 |
| <u>DDX20</u>     | 1 | 1 | 1 | 1 | 0 | 0 | 1 | 0 | 0 | 1 | 6 |
| <u>CA5B</u>      | 1 | 1 | 1 | 1 | 0 | 0 | 1 | 0 | 0 | 1 | 6 |
| <u>C6orf117</u>  | 1 | 1 | 0 | 1 | 0 | 0 | 1 | 1 | 0 | 1 | 6 |
| <u>PDAP1</u>     | 1 | 1 | 1 | 1 | 0 | 0 | 1 | 0 | 0 | 1 | 6 |
| <u>ERMAP</u>     | 1 | 0 | 1 | 1 | 0 | 0 | 1 | 1 | 0 | 1 | 6 |
| <u>SLC25A25</u>  | 1 | 1 | 1 | 1 | 0 | 0 | 1 | 0 | 0 | 1 | 6 |
| <u>FMNL2</u>     | 1 | 1 | 1 | 1 | 0 | 0 | 1 | 0 | 0 | 1 | 6 |
| <u>OSBPL11</u>   | 1 | 1 | 0 | 1 | 0 | 0 | 1 | 0 | 1 | 1 | 6 |
| <u>ADCY9</u>     | 1 | 1 | 0 | 1 | 1 | 0 | 1 | 0 | 0 | 1 | 6 |
| <u>RASGRP4</u>   | 1 | 1 | 0 | 1 | 0 | 0 | 1 | 0 | 1 | 1 | 6 |
| <u>C12orf56</u>  | 1 | 1 | 0 | 1 | 0 | 0 | 1 | 0 | 1 | 1 | 6 |
| <u>TADA1L</u>    | 1 | 1 | 1 | 1 | 0 | 0 | 1 | 0 | 0 | 1 | 6 |
| <u>MIA2</u>      | 1 | 1 | 1 | 1 | 0 | 0 | 1 | 0 | 0 | 1 | 6 |
| <u>C10orf104</u> | 1 | 1 | 1 | 1 | 0 | 0 | 1 | 0 | 0 | 1 | 6 |
| <u>TPP1</u>      | 1 | 1 | 0 | 1 | 0 | 0 | 1 | 1 | 0 | 1 | 6 |
| <u>C14orf28</u>  | 1 | 1 | 1 | 1 | 0 | 0 | 1 | 0 | 0 | 1 | 6 |
| <u>NIPA1</u>     | 1 | 1 | 0 | 1 | 0 | 0 | 1 | 1 | 0 | 1 | 6 |
| <u>WHDC1</u>     | 1 | 1 | 1 | 1 | 0 | 0 | 1 | 0 | 0 | 1 | 6 |
| <u>ZNF491</u>    | 1 | 1 | 0 | 1 | 0 | 0 | 1 | 1 | 0 | 1 | 6 |
| <u>ZNF440</u>    | 1 | 1 | 1 | 1 | 0 | 0 | 1 | 0 | 0 | 1 | 6 |
| <u>SHE</u>       | 1 | 1 | 1 | 1 | 0 | 0 | 1 | 0 | 0 | 1 | 6 |
| <u>C1orf96</u>   | 1 | 1 | 1 | 1 | 0 | 0 | 1 | 0 | 0 | 1 | 6 |
| <u>C1orf161</u>  | 1 | 1 | 1 | 1 | 0 | 0 | 1 | 0 | 0 | 1 | 6 |
| <u>UHMK1</u>     | 1 | 1 | 0 | 1 | 0 | 0 | 1 | 1 | 0 | 1 | 6 |
| <u>AP1S3</u>     | 1 | 1 | 1 | 1 | 0 | 0 | 1 | 0 | 0 | 1 | 6 |
| <u>MDH1B</u>     | 1 | 1 | 1 | 1 | 0 | 0 | 1 | 0 | 0 | 1 | 6 |
| <u>COL19A1</u>   | 1 | 1 | 1 | 1 | 0 | 0 | 1 | 0 | 0 | 1 | 6 |
| <u>KCNH8</u>     | 1 | 1 | 1 | 1 | 0 | 0 | 1 | 0 | 0 | 1 | 6 |
| <u>DCBLD2</u>    | 1 | 1 | 1 | 1 | 0 | 0 | 1 | 0 | 0 | 1 | 6 |



|                  |   |   |   |   |   |   |   |   |   |   |   |
|------------------|---|---|---|---|---|---|---|---|---|---|---|
| <u>TMEM207</u>   | 1 | 1 | 1 | 1 | 0 | 0 | 1 | 0 | 0 | 1 | 6 |
| <u>SYNPR</u>     | 1 | 0 | 1 | 1 | 1 | 0 | 1 | 0 | 0 | 1 | 6 |
| <u>MAP3K8</u>    | 1 | 1 | 1 | 1 | 0 | 0 | 1 | 0 | 0 | 1 | 6 |
| <u>DNAJC21</u>   | 1 | 0 | 1 | 1 | 1 | 0 | 1 | 0 | 0 | 1 | 6 |
| <u>WDR36</u>     | 1 | 1 | 1 | 1 | 0 | 0 | 1 | 0 | 0 | 1 | 6 |
| <u>MTPN</u>      | 1 | 1 | 0 | 1 | 1 | 0 | 1 | 0 | 0 | 1 | 6 |
| <u>CPOX</u>      | 1 | 1 | 1 | 1 | 0 | 0 | 1 | 0 | 0 | 1 | 6 |
| <u>CREBBP</u>    | 1 | 1 | 0 | 1 | 1 | 0 | 1 | 0 | 0 | 1 | 6 |
| <u>PABPC5</u>    | 1 | 1 | 1 | 1 | 0 | 0 | 1 | 0 | 0 | 1 | 6 |
| <u>MPP7</u>      | 1 | 1 | 1 | 1 | 0 | 0 | 1 | 0 | 0 | 1 | 6 |
| <u>VTI1A</u>     | 1 | 1 | 1 | 1 | 0 | 0 | 1 | 0 | 0 | 1 | 6 |
| <u>XRRA1</u>     | 1 | 1 | 1 | 1 | 0 | 0 | 1 | 0 | 0 | 1 | 6 |
| <u>CSNK2A2</u>   | 1 | 1 | 0 | 1 | 0 | 0 | 1 | 0 | 1 | 1 | 6 |
| <u>CCDC42</u>    | 1 | 1 | 0 | 1 | 0 | 0 | 1 | 0 | 1 | 1 | 6 |
| <u>CTGF</u>      | 1 | 1 | 0 | 1 | 0 | 0 | 1 | 0 | 1 | 1 | 6 |
| <u>CTNNA1</u>    | 1 | 1 | 1 | 1 | 0 | 0 | 1 | 0 | 0 | 1 | 6 |
| <u>CCT8L2</u>    | 1 | 1 | 1 | 1 | 0 | 0 | 1 | 0 | 0 | 1 | 6 |
| <u>CCDC117</u>   | 1 | 1 | 1 | 1 | 0 | 0 | 1 | 0 | 0 | 1 | 6 |
| <u>TTC14</u>     | 1 | 1 | 0 | 1 | 0 | 0 | 1 | 0 | 1 | 1 | 6 |
| <u>CCDC100</u>   | 1 | 1 | 1 | 1 | 0 | 0 | 1 | 0 | 0 | 1 | 6 |
| <u>LOC153364</u> | 1 | 1 | 1 | 1 | 0 | 0 | 1 | 0 | 0 | 1 | 6 |
| <u>CNKSR3</u>    | 1 | 1 | 1 | 1 | 0 | 0 | 1 | 0 | 0 | 1 | 6 |
| <u>FLJ31818</u>  | 1 | 1 | 0 | 1 | 0 | 0 | 1 | 1 | 0 | 1 | 6 |
| <u>CAMSAP1</u>   | 1 | 1 | 0 | 1 | 1 | 0 | 1 | 0 | 0 | 1 | 6 |
| <u>SLC5A8</u>    | 1 | 1 | 1 | 1 | 0 | 0 | 1 | 0 | 0 | 1 | 6 |
| <u>DGKH</u>      | 1 | 1 | 1 | 1 | 0 | 0 | 1 | 0 | 0 | 1 | 6 |
| <u>EXDL1</u>     | 1 | 1 | 1 | 1 | 0 | 0 | 1 | 0 | 0 | 1 | 6 |
| <u>ZNF781</u>    | 1 | 1 | 1 | 1 | 0 | 0 | 1 | 0 | 0 | 1 | 6 |
| <u>DCN</u>       | 1 | 0 | 1 | 1 | 0 | 0 | 1 | 0 | 1 | 1 | 6 |
| <u>TOR1AIP2</u>  | 1 | 1 | 1 | 1 | 0 | 0 | 1 | 0 | 0 | 1 | 6 |
| <u>LONRF2</u>    | 1 | 1 | 1 | 1 | 0 | 0 | 1 | 0 | 0 | 1 | 6 |
| <u>DDX3X</u>     | 1 | 1 | 1 | 1 | 0 | 0 | 1 | 0 | 0 | 1 | 6 |
| <u>AES</u>       | 1 | 1 | 0 | 1 | 0 | 0 | 1 | 1 | 0 | 1 | 6 |
| <u>RASSF6</u>    | 1 | 1 | 1 | 1 | 0 | 0 | 1 | 0 | 0 | 1 | 6 |
| <u>MIER3</u>     | 1 | 1 | 1 | 1 | 0 | 0 | 1 | 0 | 0 | 1 | 6 |
| <u>TMEM64</u>    | 1 | 1 | 1 | 1 | 0 | 0 | 1 | 0 | 0 | 1 | 6 |
| <u>OLFML2A</u>   | 1 | 1 | 0 | 1 | 0 | 0 | 1 | 1 | 0 | 1 | 6 |
| <u>DLX1</u>      | 1 | 1 | 0 | 1 | 1 | 1 | 1 | 0 | 0 | 0 | 6 |
| <u>DSC3</u>      | 1 | 1 | 1 | 1 | 0 | 0 | 1 | 0 | 0 | 1 | 6 |
| <u>EDG1</u>      | 1 | 1 | 1 | 1 | 0 | 0 | 1 | 0 | 0 | 1 | 6 |
| <u>EEF1A1</u>    | 1 | 1 | 0 | 1 | 1 | 1 | 1 | 0 | 0 | 0 | 6 |

|                 |   |   |   |   |   |   |   |   |   |   |   |
|-----------------|---|---|---|---|---|---|---|---|---|---|---|
| <u>HIGD2A</u>   | 1 | 1 | 0 | 1 | 0 | 0 | 1 | 1 | 0 | 1 | 6 |
| <u>MEGF9</u>    | 1 | 1 | 1 | 1 | 0 | 0 | 1 | 0 | 0 | 1 | 6 |
| <u>EGR3</u>     | 1 | 1 | 0 | 1 | 1 | 0 | 1 | 0 | 0 | 1 | 6 |
| <u>ELAVL2</u>   | 1 | 1 | 1 | 1 | 0 | 0 | 1 | 0 | 0 | 1 | 6 |
| <u>C19orf59</u> | 1 | 1 | 0 | 1 | 0 | 0 | 1 | 1 | 0 | 1 | 6 |
| <u>FBXO45</u>   | 1 | 1 | 1 | 1 | 0 | 0 | 1 | 0 | 0 | 1 | 6 |
| <u>C5orf29</u>  | 1 | 1 | 1 | 1 | 0 | 0 | 1 | 0 | 0 | 1 | 6 |
| <u>LASS3</u>    | 1 | 1 | 1 | 1 | 0 | 0 | 1 | 0 | 0 | 1 | 6 |
| <u>EREG</u>     | 1 | 1 | 1 | 1 | 0 | 0 | 1 | 0 | 0 | 1 | 6 |
| <u>ETF1</u>     | 1 | 1 | 0 | 1 | 1 | 0 | 1 | 0 | 0 | 1 | 6 |
| <u>EYA1</u>     | 1 | 0 | 0 | 1 | 1 | 1 | 1 | 0 | 0 | 1 | 6 |
| <u>EYA1</u>     | 1 | 1 | 0 | 1 | 1 | 1 | 0 | 0 | 0 | 1 | 6 |
| <u>F2R</u>      | 1 | 1 | 1 | 1 | 0 | 0 | 1 | 0 | 0 | 1 | 6 |
| <u>F5</u>       | 1 | 1 | 1 | 1 | 0 | 0 | 1 | 0 | 0 | 1 | 6 |
| <u>F11</u>      | 1 | 1 | 1 | 1 | 0 | 0 | 1 | 0 | 0 | 1 | 6 |
| <u>PLAC1L</u>   | 1 | 1 | 1 | 1 | 0 | 0 | 1 | 0 | 0 | 1 | 6 |
| <u>C10orf38</u> | 1 | 1 | 0 | 1 | 0 | 0 | 1 | 0 | 1 | 1 | 6 |
| <u>CPNE2</u>    | 1 | 1 | 1 | 1 | 0 | 0 | 1 | 0 | 0 | 1 | 6 |
| <u>C6orf199</u> | 1 | 1 | 1 | 1 | 0 | 0 | 1 | 0 | 0 | 1 | 6 |
| <u>C6orf89</u>  | 1 | 1 | 1 | 1 | 0 | 0 | 1 | 0 | 0 | 1 | 6 |
| <u>RNF182</u>   | 0 | 1 | 1 | 1 | 1 | 0 | 1 | 0 | 0 | 1 | 6 |
| <u>TWISTNB</u>  | 1 | 1 | 1 | 1 | 0 | 0 | 1 | 0 | 0 | 1 | 6 |
| <u>FOKK1</u>    | 1 | 1 | 1 | 1 | 0 | 0 | 1 | 0 | 0 | 1 | 6 |
| <u>ZNRF2</u>    | 1 | 1 | 1 | 1 | 0 | 0 | 1 | 0 | 0 | 1 | 6 |
| <u>TFEC</u>     | 1 | 1 | 1 | 1 | 0 | 0 | 1 | 0 | 0 | 1 | 6 |
| <u>PHLDA1</u>   | 1 | 1 | 0 | 1 | 1 | 0 | 1 | 0 | 0 | 1 | 6 |
| <u>MTF2</u>     | 1 | 1 | 1 | 1 | 0 | 0 | 1 | 0 | 0 | 1 | 6 |
| <u>CARD8</u>    | 1 | 1 | 1 | 1 | 0 | 0 | 1 | 0 | 0 | 1 | 6 |
| <u>MYH15</u>    | 1 | 1 | 1 | 1 | 0 | 0 | 1 | 0 | 0 | 1 | 6 |
| <u>WDFY3</u>    | 1 | 1 | 1 | 1 | 0 | 0 | 1 | 0 | 0 | 1 | 6 |
| <u>DAAM1</u>    | 1 | 1 | 0 | 1 | 0 | 0 | 1 | 0 | 1 | 1 | 6 |
| <u>DOPEY1</u>   | 1 | 1 | 0 | 1 | 1 | 0 | 1 | 0 | 0 | 1 | 6 |
| <u>PHLPPL</u>   | 1 | 1 | 1 | 1 | 0 | 0 | 1 | 0 | 0 | 1 | 6 |
| <u>ARHGAP26</u> | 1 | 1 | 1 | 1 | 0 | 0 | 1 | 0 | 0 | 1 | 6 |
| <u>CAMTA2</u>   | 1 | 1 | 0 | 1 | 0 | 0 | 1 | 0 | 1 | 1 | 6 |
| <u>EPB41L3</u>  | 1 | 1 | 0 | 1 | 0 | 0 | 1 | 0 | 1 | 1 | 6 |
| <u>RTF1</u>     | 1 | 1 | 0 | 1 | 1 | 0 | 1 | 0 | 0 | 1 | 6 |
| <u>RCOR1</u>    | 1 | 1 | 1 | 1 | 0 | 0 | 1 | 0 | 0 | 1 | 6 |
| <u>KANK1</u>    | 1 | 1 | 0 | 1 | 1 | 1 | 0 | 0 | 0 | 1 | 6 |
| <u>KIAA0182</u> | 1 | 1 | 0 | 1 | 1 | 0 | 1 | 0 | 0 | 1 | 6 |
| <u>BAT2D1</u>   | 1 | 1 | 1 | 1 | 0 | 0 | 1 | 0 | 0 | 1 | 6 |

|               |   |   |   |   |   |   |   |   |   |   |   |
|---------------|---|---|---|---|---|---|---|---|---|---|---|
| VPS13A        | 1 | 1 | 1 | 1 | 0 | 0 | 1 | 0 | 0 | 1 | 6 |
| TSPYL4        | 1 | 1 | 1 | 1 | 0 | 0 | 1 | 0 | 0 | 1 | 6 |
| KIAA0664      | 1 | 1 | 0 | 1 | 0 | 0 | 1 | 0 | 1 | 1 | 6 |
| ATMIN         | 1 | 1 | 1 | 1 | 0 | 0 | 1 | 0 | 0 | 1 | 6 |
| WSCD1         | 1 | 1 | 1 | 1 | 0 | 0 | 1 | 0 | 0 | 1 | 6 |
| DMXL2         | 1 | 1 | 1 | 1 | 0 | 0 | 1 | 0 | 0 | 1 | 6 |
| DPY19L1       | 1 | 1 | 1 | 1 | 0 | 0 | 1 | 0 | 0 | 1 | 6 |
| AFF2          | 1 | 1 | 1 | 1 | 0 | 0 | 1 | 0 | 0 | 1 | 6 |
| FNBP4         | 1 | 1 | 1 | 1 | 0 | 0 | 1 | 0 | 0 | 1 | 6 |
| NPTXR         | 0 | 1 | 1 | 1 | 1 | 0 | 1 | 0 | 0 | 1 | 6 |
| HEY2          | 1 | 1 | 1 | 1 | 0 | 0 | 1 | 0 | 0 | 1 | 6 |
| MORC3         | 1 | 1 | 1 | 1 | 0 | 0 | 1 | 0 | 0 | 1 | 6 |
| CENTB2        | 1 | 1 | 0 | 1 | 1 | 0 | 1 | 0 | 0 | 1 | 6 |
| ARL2BP        | 1 | 1 | 1 | 1 | 0 | 0 | 1 | 0 | 0 | 1 | 6 |
| CORO1C        | 1 | 1 | 0 | 1 | 0 | 0 | 1 | 1 | 0 | 1 | 6 |
| MKRN1         | 1 | 1 | 0 | 1 | 0 | 0 | 1 | 0 | 1 | 1 | 6 |
| C15orf2       | 1 | 1 | 1 | 1 | 0 | 0 | 1 | 0 | 0 | 1 | 6 |
| PITPNB        | 1 | 1 | 1 | 1 | 0 | 0 | 1 | 0 | 0 | 1 | 6 |
| FUT1          | 1 | 1 | 1 | 1 | 0 | 0 | 1 | 0 | 0 | 1 | 6 |
| ZNF396        | 1 | 1 | 1 | 1 | 0 | 0 | 1 | 0 | 0 | 1 | 6 |
| LYCAT         | 1 | 1 | 0 | 1 | 1 | 1 | 0 | 0 | 0 | 1 | 6 |
| RNF144B       | 1 | 1 | 0 | 1 | 0 | 0 | 1 | 1 | 0 | 1 | 6 |
| GABRA4        | 1 | 1 | 1 | 1 | 0 | 0 | 1 | 0 | 0 | 1 | 6 |
| C3orf43       | 1 | 1 | 1 | 1 | 0 | 0 | 1 | 0 | 0 | 1 | 6 |
| TMEM196       | 1 | 1 | 1 | 1 | 0 | 0 | 1 | 0 | 0 | 1 | 6 |
| ST6GALNAC3    | 1 | 1 | 1 | 1 | 0 | 0 | 1 | 0 | 0 | 1 | 6 |
| GABRG1        | 1 | 1 | 0 | 1 | 0 | 0 | 1 | 1 | 0 | 1 | 6 |
| MAP3K7IP3     | 1 | 1 | 0 | 1 | 1 | 0 | 1 | 0 | 0 | 1 | 6 |
| SVIP          | 1 | 1 | 1 | 1 | 0 | 0 | 1 | 0 | 0 | 1 | 6 |
| NIPBL         | 1 | 1 | 0 | 1 | 1 | 1 | 0 | 0 | 0 | 1 | 6 |
| DKFZP564O0823 | 1 | 1 | 1 | 1 | 0 | 0 | 1 | 0 | 0 | 1 | 6 |
| GALNT1        | 1 | 1 | 0 | 1 | 1 | 0 | 1 | 0 | 0 | 1 | 6 |
| SAMHD1        | 1 | 1 | 1 | 1 | 0 | 0 | 1 | 0 | 0 | 1 | 6 |
| GPR124        | 1 | 1 | 0 | 1 | 1 | 1 | 1 | 0 | 0 | 0 | 6 |
| CHMP2B        | 1 | 1 | 1 | 1 | 0 | 0 | 1 | 0 | 0 | 1 | 6 |
| ZZZ3          | 1 | 1 | 0 | 1 | 0 | 0 | 1 | 0 | 1 | 1 | 6 |
| ERC2          | 1 | 1 | 1 | 1 | 0 | 0 | 1 | 0 | 0 | 1 | 6 |
| PTPN22        | 1 | 1 | 1 | 1 | 0 | 0 | 1 | 0 | 0 | 1 | 6 |
| FBXL3         | 1 | 1 | 1 | 1 | 0 | 0 | 1 | 0 | 0 | 1 | 6 |
| PLDN          | 1 | 1 | 1 | 1 | 0 | 0 | 1 | 0 | 0 | 1 | 6 |

|                 |   |   |   |   |   |   |   |   |   |   |   |
|-----------------|---|---|---|---|---|---|---|---|---|---|---|
| <u>SACS</u>     | 1 | 1 | 0 | 1 | 1 | 0 | 1 | 0 | 0 | 1 | 6 |
| <u>EHF</u>      | 1 | 1 | 1 | 1 | 0 | 0 | 1 | 0 | 0 | 1 | 6 |
| <u>LATS2</u>    | 1 | 1 | 0 | 1 | 0 | 0 | 1 | 0 | 1 | 1 | 6 |
| <u>MSTN</u>     | 1 | 1 | 0 | 1 | 0 | 0 | 1 | 0 | 1 | 1 | 6 |
| <u>NUFIP1</u>   | 1 | 1 | 1 | 1 | 0 | 0 | 1 | 0 | 0 | 1 | 6 |
| <u>ACAD8</u>    | 1 | 1 | 0 | 1 | 0 | 0 | 1 | 1 | 0 | 1 | 6 |
| <u>GHITM</u>    | 1 | 1 | 1 | 1 | 0 | 0 | 1 | 0 | 0 | 1 | 6 |
| <u>TAF5L</u>    | 1 | 1 | 1 | 1 | 0 | 0 | 1 | 0 | 0 | 1 | 6 |
| <u>ASAH1</u>    | 1 | 1 | 1 | 1 | 0 | 0 | 1 | 0 | 0 | 1 | 6 |
| <u>OXGR1</u>    | 1 | 1 | 1 | 1 | 0 | 0 | 1 | 0 | 0 | 1 | 6 |
| <u>COQ2</u>     | 1 | 1 | 1 | 1 | 0 | 0 | 1 | 0 | 0 | 1 | 6 |
| <u>ARFIP1</u>   | 1 | 1 | 0 | 1 | 0 | 0 | 1 | 0 | 1 | 1 | 6 |
| <u>BBS9</u>     | 1 | 1 | 1 | 1 | 0 | 0 | 1 | 0 | 0 | 1 | 6 |
| <u>ZNF544</u>   | 1 | 1 | 1 | 1 | 0 | 0 | 1 | 0 | 0 | 1 | 6 |
| <u>GLRX</u>     | 1 | 1 | 1 | 1 | 0 | 0 | 1 | 0 | 0 | 1 | 6 |
| <u>GNA12</u>    | 1 | 1 | 1 | 1 | 0 | 0 | 1 | 0 | 0 | 1 | 6 |
| <u>GOLGA1</u>   | 1 | 1 | 0 | 1 | 1 | 0 | 1 | 0 | 0 | 1 | 6 |
| <u>GP5</u>      | 1 | 1 | 1 | 1 | 0 | 0 | 1 | 0 | 0 | 1 | 6 |
| <u>GPR137C</u>  | 1 | 1 | 1 | 1 | 0 | 0 | 1 | 0 | 0 | 1 | 6 |
| <u>PRTG</u>     | 1 | 1 | 1 | 1 | 0 | 0 | 1 | 0 | 0 | 1 | 6 |
| <u>ZNF776</u>   | 1 | 1 | 0 | 1 | 0 | 0 | 1 | 1 | 0 | 1 | 6 |
| <u>ANGPT2</u>   | 1 | 1 | 0 | 1 | 1 | 0 | 1 | 0 | 0 | 1 | 6 |
| <u>GPRIN3</u>   | 1 | 1 | 1 | 1 | 0 | 0 | 1 | 0 | 0 | 1 | 6 |
| <u>C5orf36</u>  | 1 | 1 | 1 | 1 | 0 | 0 | 1 | 0 | 0 | 1 | 6 |
| <u>TREML4</u>   | 1 | 1 | 1 | 1 | 0 | 0 | 1 | 0 | 0 | 1 | 6 |
| <u>EFHA2</u>    | 1 | 1 | 1 | 1 | 0 | 0 | 1 | 0 | 0 | 1 | 6 |
| <u>OSTM1</u>    | 1 | 1 | 0 | 1 | 0 | 0 | 1 | 1 | 0 | 1 | 6 |
| <u>TMEM14A</u>  | 1 | 1 | 1 | 1 | 0 | 0 | 1 | 0 | 0 | 1 | 6 |
| <u>GRIK2</u>    | 1 | 1 | 0 | 1 | 1 | 1 | 0 | 0 | 0 | 1 | 6 |
| <u>HSPC159</u>  | 1 | 1 | 1 | 1 | 0 | 0 | 1 | 0 | 0 | 1 | 6 |
| <u>GRM5</u>     | 0 | 0 | 1 | 1 | 1 | 1 | 1 | 0 | 0 | 1 | 6 |
| <u>CXCL2</u>    | 1 | 1 | 1 | 1 | 0 | 0 | 1 | 0 | 0 | 1 | 6 |
| <u>GUCA1B</u>   | 1 | 1 | 0 | 1 | 0 | 0 | 1 | 1 | 0 | 1 | 6 |
| <u>YPEL1</u>    | 1 | 1 | 1 | 1 | 0 | 0 | 1 | 0 | 0 | 1 | 6 |
| <u>GYPA</u>     | 1 | 1 | 1 | 1 | 0 | 0 | 1 | 0 | 0 | 1 | 6 |
| <u>SLC25A24</u> | 1 | 1 | 1 | 1 | 0 | 0 | 1 | 0 | 0 | 1 | 6 |
| <u>DMGDH</u>    | 1 | 1 | 1 | 1 | 0 | 0 | 1 | 0 | 0 | 1 | 6 |
| <u>ANXA6</u>    | 1 | 1 | 0 | 1 | 0 | 0 | 1 | 0 | 1 | 1 | 6 |
| <u>HK2</u>      | 1 | 1 | 1 | 1 | 0 | 0 | 1 | 0 | 0 | 1 | 6 |
| <u>HOXB4</u>    | 1 | 1 | 1 | 1 | 0 | 0 | 1 | 0 | 0 | 1 | 6 |
| <u>HOXD1</u>    | 1 | 1 | 1 | 1 | 0 | 0 | 1 | 0 | 0 | 1 | 6 |

|                  |   |   |   |   |   |   |   |   |   |   |   |
|------------------|---|---|---|---|---|---|---|---|---|---|---|
| <u>HOXD3</u>     | 1 | 1 | 1 | 1 | 0 | 0 | 1 | 0 | 0 | 1 | 6 |
| <u>TMEM173</u>   | 1 | 1 | 0 | 1 | 0 | 0 | 1 | 1 | 0 | 1 | 6 |
| <u>MYLK4</u>     | 1 | 1 | 0 | 1 | 0 | 0 | 1 | 1 | 0 | 1 | 6 |
| <u>RSPO2</u>     | 1 | 1 | 0 | 1 | 1 | 0 | 1 | 0 | 0 | 1 | 6 |
| <u>KIAA2022</u>  | 1 | 1 | 1 | 1 | 0 | 0 | 1 | 0 | 0 | 1 | 6 |
| <u>GLDN</u>      | 1 | 1 | 1 | 1 | 0 | 0 | 1 | 0 | 0 | 1 | 6 |
| <u>ZNF677</u>    | 1 | 1 | 1 | 1 | 0 | 0 | 1 | 0 | 0 | 1 | 6 |
| <u>ICHTHYIN</u>  | 1 | 1 | 1 | 1 | 0 | 0 | 1 | 0 | 0 | 1 | 6 |
| <u>HCN1</u>      | 1 | 1 | 1 | 1 | 0 | 0 | 1 | 0 | 0 | 1 | 6 |
| <u>FAS</u>       | 1 | 1 | 1 | 1 | 0 | 0 | 1 | 0 | 0 | 1 | 6 |
| <u>IL2</u>       | 1 | 1 | 1 | 1 | 0 | 0 | 1 | 0 | 0 | 1 | 6 |
| <u>ILF3</u>      | 1 | 1 | 1 | 1 | 0 | 0 | 1 | 0 | 0 | 1 | 6 |
| <u>AQP9</u>      | 1 | 1 | 0 | 1 | 0 | 0 | 1 | 1 | 0 | 1 | 6 |
| <u>ITGA3</u>     | 1 | 1 | 0 | 1 | 1 | 0 | 1 | 0 | 0 | 1 | 6 |
| <u>JAK2</u>      | 1 | 1 | 0 | 1 | 0 | 0 | 1 | 0 | 1 | 1 | 6 |
| <u>C3orf62</u>   | 1 | 1 | 1 | 1 | 0 | 0 | 1 | 0 | 0 | 1 | 6 |
| <u>KCNMA1</u>    | 1 | 1 | 0 | 1 | 0 | 0 | 1 | 0 | 1 | 1 | 6 |
| <u>KIF5C</u>     | 1 | 1 | 0 | 1 | 0 | 0 | 1 | 1 | 0 | 1 | 6 |
| <u>KRAS</u>      | 1 | 1 | 0 | 1 | 1 | 1 | 0 | 0 | 0 | 1 | 6 |
| <u>LMAN1</u>     | 1 | 1 | 1 | 1 | 0 | 0 | 1 | 0 | 0 | 1 | 6 |
| <u>LOC400120</u> | 1 | 1 | 0 | 1 | 0 | 0 | 1 | 1 | 0 | 1 | 6 |
| <u>ZBTB34</u>    | 1 | 1 | 1 | 1 | 0 | 0 | 1 | 0 | 0 | 1 | 6 |
| <u>LTBP2</u>     | 1 | 1 | 0 | 1 | 0 | 0 | 1 | 1 | 0 | 1 | 6 |
| <u>CAPRIN1</u>   | 1 | 1 | 1 | 1 | 0 | 0 | 1 | 0 | 0 | 1 | 6 |
| <u>STS</u>       | 1 | 1 | 1 | 1 | 0 | 0 | 1 | 0 | 0 | 1 | 6 |
| <u>MEIS2</u>     | 1 | 0 | 0 | 1 | 1 | 1 | 1 | 0 | 1 | 0 | 6 |
| <u>MAP3K3</u>    | 1 | 1 | 0 | 1 | 1 | 1 | 0 | 0 | 0 | 1 | 6 |
| <u>KITLG</u>     | 1 | 1 | 1 | 1 | 0 | 0 | 1 | 0 | 0 | 1 | 6 |
| <u>MIP</u>       | 1 | 1 | 1 | 1 | 0 | 0 | 1 | 0 | 0 | 1 | 6 |
| <u>ATXN3</u>     | 1 | 1 | 1 | 1 | 0 | 0 | 1 | 0 | 0 | 1 | 6 |
| <u>AFF1</u>      | 1 | 1 | 0 | 1 | 1 | 0 | 1 | 0 | 0 | 1 | 6 |
| <u>MMP14</u>     | 1 | 1 | 0 | 1 | 1 | 0 | 1 | 0 | 0 | 1 | 6 |
| <u>CCDC88C</u>   | 1 | 1 | 1 | 1 | 0 | 0 | 1 | 0 | 0 | 1 | 6 |
| <u>MUC7</u>      | 1 | 1 | 1 | 1 | 0 | 0 | 1 | 0 | 0 | 1 | 6 |
| <u>MYH10</u>     | 1 | 1 | 0 | 1 | 1 | 0 | 1 | 0 | 0 | 1 | 6 |
| <u>MYO1E</u>     | 1 | 1 | 1 | 1 | 0 | 0 | 1 | 0 | 0 | 1 | 6 |
| <u>MYO6</u>      | 1 | 1 | 0 | 1 | 0 | 0 | 1 | 0 | 1 | 1 | 6 |
| <u>PPP1R12B</u>  | 0 | 1 | 1 | 1 | 1 | 0 | 1 | 0 | 0 | 1 | 6 |
| <u>ATM</u>       | 1 | 1 | 1 | 1 | 0 | 0 | 1 | 0 | 0 | 1 | 6 |
| <u>NFYB</u>      | 1 | 1 | 1 | 1 | 0 | 0 | 1 | 0 | 0 | 1 | 6 |
| <u>ATP1B2</u>    | 1 | 1 | 1 | 1 | 0 | 0 | 1 | 0 | 0 | 1 | 6 |

|           |   |   |   |   |   |   |   |   |   |   |   |
|-----------|---|---|---|---|---|---|---|---|---|---|---|
| CNOT2     | 1 | 1 | 1 | 1 | 0 | 0 | 1 | 0 | 0 | 1 | 6 |
| NOTCH2    | 1 | 1 | 1 | 1 | 0 | 0 | 1 | 0 | 0 | 1 | 6 |
| NRAS      | 1 | 1 | 1 | 1 | 0 | 0 | 1 | 0 | 0 | 1 | 6 |
| LOC493869 | 1 | 1 | 1 | 1 | 0 | 0 | 1 | 0 | 0 | 1 | 6 |
| TNFRSF11B | 1 | 1 | 1 | 1 | 0 | 0 | 1 | 0 | 0 | 1 | 6 |
| MINK1     | 1 | 1 | 0 | 1 | 1 | 0 | 1 | 0 | 0 | 1 | 6 |
| SERPINE1  | 1 | 1 | 1 | 1 | 0 | 0 | 1 | 0 | 0 | 1 | 6 |
| ITSN2     | 1 | 1 | 0 | 1 | 0 | 0 | 1 | 0 | 1 | 1 | 6 |
| PAK2      | 1 | 1 | 0 | 1 | 0 | 0 | 1 | 1 | 0 | 1 | 6 |
| PARK2     | 1 | 1 | 1 | 1 | 0 | 0 | 1 | 0 | 0 | 1 | 6 |
| AK3       | 1 | 1 | 1 | 1 | 0 | 0 | 1 | 0 | 0 | 1 | 6 |
| PAX9      | 1 | 1 | 1 | 1 | 0 | 0 | 1 | 0 | 0 | 1 | 6 |
| RRP15     | 1 | 1 | 1 | 1 | 0 | 0 | 1 | 0 | 0 | 1 | 6 |
| MRPS16    | 1 | 1 | 1 | 1 | 0 | 0 | 1 | 0 | 0 | 1 | 6 |
| KLHL5     | 1 | 1 | 1 | 1 | 0 | 0 | 1 | 0 | 0 | 1 | 6 |
| FAM82B    | 1 | 1 | 1 | 1 | 0 | 0 | 1 | 0 | 0 | 1 | 6 |
| SS18L2    | 1 | 1 | 1 | 1 | 0 | 0 | 1 | 0 | 0 | 1 | 6 |
| PCSK1     | 1 | 1 | 1 | 1 | 0 | 0 | 1 | 0 | 0 | 1 | 6 |
| SLC25A37  | 1 | 1 | 1 | 1 | 0 | 0 | 1 | 0 | 0 | 1 | 6 |
| MEX3C     | 1 | 1 | 0 | 1 | 1 | 0 | 1 | 0 | 0 | 1 | 6 |
| SPG21     | 1 | 1 | 0 | 1 | 0 | 0 | 1 | 0 | 1 | 1 | 6 |
| HOOK1     | 1 | 1 | 1 | 1 | 0 | 0 | 1 | 0 | 0 | 1 | 6 |
| CDC40     | 1 | 1 | 1 | 1 | 0 | 0 | 1 | 0 | 0 | 1 | 6 |
| WNT16     | 1 | 1 | 1 | 1 | 0 | 0 | 1 | 0 | 0 | 1 | 6 |
| PRKAG2    | 1 | 1 | 0 | 1 | 0 | 0 | 1 | 0 | 1 | 1 | 6 |
| YTHDF2    | 1 | 1 | 0 | 1 | 1 | 0 | 1 | 0 | 0 | 1 | 6 |
| PDK1      | 1 | 1 | 1 | 1 | 0 | 0 | 1 | 0 | 0 | 1 | 6 |
| MRPS23    | 1 | 1 | 0 | 1 | 0 | 0 | 1 | 1 | 0 | 1 | 6 |
| ZFR       | 1 | 1 | 0 | 1 | 0 | 0 | 1 | 0 | 1 | 1 | 6 |
| SELT      | 1 | 1 | 1 | 1 | 0 | 0 | 1 | 0 | 0 | 1 | 6 |
| PFAS      | 1 | 1 | 0 | 1 | 0 | 0 | 1 | 0 | 1 | 1 | 6 |
| PGR       | 1 | 1 | 1 | 1 | 0 | 0 | 1 | 0 | 0 | 1 | 6 |
| SERPINB5  | 1 | 1 | 0 | 1 | 1 | 0 | 1 | 0 | 0 | 1 | 6 |
| PLA2G4A   | 1 | 1 | 0 | 1 | 0 | 0 | 1 | 0 | 1 | 1 | 6 |
| PLAU      | 1 | 1 | 1 | 1 | 0 | 0 | 1 | 0 | 0 | 1 | 6 |
| BCL11A    | 1 | 1 | 1 | 1 | 0 | 0 | 1 | 0 | 0 | 1 | 6 |
| PLD1      | 1 | 1 | 1 | 1 | 0 | 0 | 1 | 0 | 0 | 1 | 6 |
| PMAIP1    | 1 | 1 | 1 | 1 | 0 | 0 | 1 | 0 | 0 | 1 | 6 |
| CSNK1G1   | 1 | 1 | 0 | 1 | 1 | 0 | 1 | 0 | 0 | 1 | 6 |
| BRWD1     | 1 | 1 | 1 | 1 | 0 | 0 | 1 | 0 | 0 | 1 | 6 |
| GPR88     | 1 | 1 | 1 | 1 | 0 | 0 | 1 | 0 | 0 | 1 | 6 |

|                 |   |   |   |   |   |   |   |   |   |   |   |
|-----------------|---|---|---|---|---|---|---|---|---|---|---|
| <u>UBL3</u>     | 1 | 1 | 1 | 1 | 0 | 0 | 1 | 0 | 0 | 1 | 6 |
| <u>DCUN1D1</u>  | 1 | 1 | 0 | 1 | 1 | 0 | 1 | 0 | 0 | 1 | 6 |
| <u>KCNK10</u>   | 1 | 1 | 0 | 1 | 1 | 0 | 1 | 0 | 0 | 1 | 6 |
| <u>POLA1</u>    | 1 | 1 | 0 | 1 | 0 | 0 | 1 | 0 | 1 | 1 | 6 |
| <u>HAO1</u>     | 1 | 1 | 1 | 1 | 0 | 0 | 1 | 0 | 0 | 1 | 6 |
| <u>SIAE</u>     | 1 | 1 | 1 | 1 | 0 | 0 | 1 | 0 | 0 | 1 | 6 |
| <u>RIN2</u>     | 1 | 1 | 1 | 1 | 0 | 0 | 1 | 0 | 0 | 1 | 6 |
| <u>KIAA1128</u> | 1 | 1 | 0 | 1 | 1 | 0 | 1 | 0 | 0 | 1 | 6 |
| <u>SMCR7L</u>   | 1 | 1 | 0 | 1 | 0 | 0 | 1 | 1 | 0 | 1 | 6 |
| <u>RBM47</u>    | 1 | 1 | 0 | 1 | 0 | 0 | 1 | 1 | 0 | 1 | 6 |
| <u>DHX29</u>    | 1 | 1 | 1 | 1 | 0 | 0 | 1 | 0 | 0 | 1 | 6 |
| <u>MTMR12</u>   | 1 | 1 | 1 | 1 | 0 | 0 | 1 | 0 | 0 | 1 | 6 |
| <u>EPB41L4B</u> | 1 | 1 | 0 | 1 | 1 | 0 | 1 | 0 | 0 | 1 | 6 |
| <u>RSBN1</u>    | 1 | 1 | 0 | 1 | 1 | 0 | 1 | 0 | 0 | 1 | 6 |
| <u>OTUD4</u>    | 1 | 1 | 1 | 1 | 0 | 0 | 1 | 0 | 0 | 1 | 6 |
| <u>ZRANB1</u>   | 1 | 1 | 1 | 1 | 0 | 0 | 1 | 0 | 0 | 1 | 6 |
| <u>CNNM2</u>    | 1 | 1 | 1 | 1 | 0 | 0 | 1 | 0 | 0 | 1 | 6 |
| <u>ZNF586</u>   | 1 | 1 | 1 | 1 | 0 | 0 | 1 | 0 | 0 | 1 | 6 |
| <u>PPM1B</u>    | 1 | 1 | 1 | 1 | 0 | 0 | 1 | 0 | 0 | 1 | 6 |
| <u>C1orf109</u> | 1 | 1 | 1 | 1 | 0 | 0 | 1 | 0 | 0 | 1 | 6 |
| <u>MOSC2</u>    | 1 | 1 | 1 | 1 | 0 | 0 | 1 | 0 | 0 | 1 | 6 |
| <u>PPP1CB</u>   | 1 | 1 | 0 | 1 | 1 | 1 | 0 | 0 | 0 | 1 | 6 |
| <u>HEATR3</u>   | 1 | 1 | 1 | 1 | 0 | 0 | 1 | 0 | 0 | 1 | 6 |
| <u>PTCD3</u>    | 1 | 1 | 0 | 1 | 0 | 0 | 1 | 1 | 0 | 1 | 6 |
| <u>PPP1R2</u>   | 1 | 1 | 0 | 1 | 0 | 0 | 1 | 1 | 0 | 1 | 6 |
| <u>ATG16L1</u>  | 1 | 1 | 0 | 1 | 0 | 0 | 1 | 1 | 0 | 1 | 6 |
| <u>AIM1L</u>    | 1 | 1 | 1 | 1 | 0 | 0 | 1 | 0 | 0 | 1 | 6 |
| <u>PPP1R3C</u>  | 1 | 1 | 1 | 1 | 0 | 0 | 1 | 0 | 0 | 1 | 6 |
| <u>SOBP</u>     | 1 | 1 | 1 | 1 | 0 | 0 | 1 | 0 | 0 | 1 | 6 |
| <u>PPP1R3D</u>  | 1 | 1 | 1 | 1 | 0 | 0 | 1 | 0 | 0 | 1 | 6 |
| <u>PLEKHJ1</u>  | 1 | 1 | 0 | 1 | 1 | 0 | 1 | 0 | 0 | 1 | 6 |
| <u>FIGN</u>     | 1 | 1 | 1 | 1 | 0 | 0 | 1 | 0 | 0 | 1 | 6 |
| <u>ARMC1</u>    | 1 | 1 | 0 | 1 | 0 | 0 | 1 | 1 | 0 | 1 | 6 |
| <u>TMEM33</u>   | 1 | 1 | 1 | 1 | 0 | 0 | 1 | 0 | 0 | 1 | 6 |
| <u>SHQ1</u>     | 1 | 1 | 1 | 1 | 0 | 0 | 1 | 0 | 0 | 1 | 6 |
| <u>MSL2L1</u>   | 1 | 1 | 0 | 1 | 1 | 0 | 1 | 0 | 0 | 1 | 6 |
| <u>C20orf12</u> | 1 | 1 | 1 | 1 | 0 | 0 | 1 | 0 | 0 | 1 | 6 |
| <u>PPP2R2C</u>  | 1 | 0 | 0 | 1 | 1 | 1 | 1 | 0 | 0 | 1 | 6 |
| <u>PPP2R2C</u>  | 1 | 1 | 0 | 1 | 1 | 1 | 0 | 0 | 0 | 1 | 6 |
| <u>CCDC25</u>   | 1 | 1 | 1 | 1 | 0 | 0 | 1 | 0 | 0 | 1 | 6 |
| <u>ASXL2</u>    | 1 | 1 | 0 | 1 | 0 | 0 | 1 | 1 | 0 | 1 | 6 |

|                     |   |   |   |   |   |   |   |   |   |   |   |
|---------------------|---|---|---|---|---|---|---|---|---|---|---|
| <u>PSPC1</u>        | 0 | 1 | 1 | 1 | 0 | 0 | 1 | 0 | 1 | 1 | 6 |
| <u>ZNF654</u>       | 1 | 1 | 1 | 1 | 0 | 0 | 1 | 0 | 0 | 1 | 6 |
| <u>C20orf29</u>     | 1 | 1 | 1 | 1 | 0 | 0 | 1 | 0 | 0 | 1 | 6 |
| <u>LIN7C</u>        | 1 | 1 | 0 | 1 | 1 | 0 | 1 | 0 | 0 | 1 | 6 |
| <u>STRBP</u>        | 1 | 1 | 0 | 1 | 1 | 1 | 1 | 0 | 0 | 0 | 6 |
| <u>LAPTM4B</u>      | 1 | 1 | 1 | 1 | 0 | 0 | 1 | 0 | 0 | 1 | 6 |
| <u>SLC22A15</u>     | 1 | 1 | 1 | 1 | 0 | 0 | 1 | 0 | 0 | 1 | 6 |
| <u>ZNF823</u>       | 1 | 1 | 1 | 1 | 0 | 0 | 1 | 0 | 0 | 1 | 6 |
| <u>DOCK10</u>       | 1 | 1 | 1 | 1 | 0 | 0 | 1 | 0 | 0 | 1 | 6 |
| <u>RUFY2</u>        | 1 | 1 | 1 | 1 | 0 | 0 | 1 | 0 | 0 | 1 | 6 |
| <u>CCAR1</u>        | 1 | 1 | 1 | 1 | 0 | 0 | 1 | 0 | 0 | 1 | 6 |
| <u>AGK</u>          | 1 | 1 | 1 | 1 | 0 | 0 | 1 | 0 | 0 | 1 | 6 |
| <u>TMEM34</u>       | 1 | 1 | 1 | 1 | 0 | 0 | 1 | 0 | 0 | 1 | 6 |
| <u>EXOC2</u>        | 1 | 1 | 1 | 1 | 0 | 0 | 1 | 0 | 0 | 1 | 6 |
| <u>PRKCA</u>        | 1 | 1 | 0 | 1 | 0 | 0 | 1 | 1 | 0 | 1 | 6 |
| <u>PCID2</u>        | 1 | 1 | 1 | 1 | 0 | 0 | 1 | 0 | 0 | 1 | 6 |
| <u>PRKCD</u>        | 1 | 1 | 0 | 1 | 1 | 1 | 0 | 0 | 0 | 1 | 6 |
| <u>PAG1</u>         | 1 | 1 | 1 | 1 | 0 | 0 | 1 | 0 | 0 | 1 | 6 |
| <u>TEX2</u>         | 1 | 1 | 0 | 1 | 0 | 0 | 1 | 0 | 1 | 1 | 6 |
| <u>TMEM165</u>      | 1 | 1 | 1 | 1 | 0 | 0 | 1 | 0 | 0 | 1 | 6 |
| <u>LMO3</u>         | 1 | 1 | 0 | 1 | 1 | 1 | 0 | 0 | 0 | 1 | 6 |
| <u>MLL5</u>         | 1 | 0 | 1 | 1 | 0 | 0 | 1 | 0 | 1 | 1 | 6 |
| <u>NKRF</u>         | 1 | 1 | 0 | 1 | 0 | 0 | 1 | 0 | 1 | 1 | 6 |
| <u>MAPK1</u>        | 1 | 1 | 1 | 1 | 0 | 0 | 1 | 0 | 0 | 1 | 6 |
| <u>PCDHA6</u>       | 1 | 1 | 0 | 1 | 1 | 1 | 0 | 0 | 0 | 1 | 6 |
| <u>MOSPD1</u>       | 1 | 1 | 1 | 1 | 0 | 0 | 1 | 0 | 0 | 1 | 6 |
| <u>RP5-1022P6.2</u> | 1 | 1 | 1 | 1 | 0 | 0 | 1 | 0 | 0 | 1 | 6 |
| <u>PSG9</u>         | 1 | 1 | 1 | 1 | 0 | 0 | 1 | 0 | 0 | 1 | 6 |
| <u>RGMA</u>         | 1 | 1 | 0 | 1 | 1 | 0 | 1 | 0 | 0 | 1 | 6 |
| <u>PRDM10</u>       | 1 | 1 | 0 | 1 | 1 | 0 | 1 | 1 | 0 | 0 | 6 |
| <u>TULP4</u>        | 1 | 1 | 0 | 1 | 1 | 0 | 1 | 0 | 0 | 1 | 6 |
| <u>CABC1</u>        | 1 | 1 | 1 | 1 | 0 | 0 | 1 | 0 | 0 | 1 | 6 |
| <u>PARP11</u>       | 1 | 1 | 1 | 1 | 0 | 0 | 1 | 0 | 0 | 1 | 6 |
| <u>KIAA1219</u>     | 1 | 1 | 1 | 1 | 0 | 0 | 1 | 0 | 0 | 1 | 6 |
| <u>PELI1</u>        | 1 | 1 | 0 | 1 | 1 | 1 | 1 | 0 | 0 | 0 | 6 |
| <u>ANKRD50</u>      | 1 | 1 | 1 | 1 | 0 | 0 | 1 | 0 | 0 | 1 | 6 |
| <u>PTGER3</u>       | 1 | 1 | 1 | 1 | 0 | 0 | 1 | 0 | 0 | 1 | 6 |
| <u>TMEM27</u>       | 1 | 1 | 1 | 1 | 0 | 0 | 1 | 0 | 0 | 1 | 6 |
| <u>PTGS2</u>        | 1 | 1 | 1 | 1 | 0 | 0 | 1 | 0 | 0 | 1 | 6 |
| <u>BIRC6</u>        | 1 | 1 | 1 | 1 | 0 | 0 | 1 | 0 | 0 | 1 | 6 |
| <u>NLN</u>          | 1 | 1 | 1 | 1 | 0 | 0 | 1 | 0 | 0 | 1 | 6 |



|                  |   |   |   |   |   |   |   |   |   |   |   |
|------------------|---|---|---|---|---|---|---|---|---|---|---|
| <u>MTUS1</u>     | 1 | 1 | 1 | 1 | 0 | 0 | 1 | 0 | 0 | 1 | 6 |
| <u>PCDH19</u>    | 1 | 1 | 0 | 1 | 0 | 0 | 1 | 0 | 1 | 1 | 6 |
| <u>KLHDC5</u>    | 1 | 1 | 1 | 1 | 0 | 0 | 1 | 0 | 0 | 1 | 6 |
| <u>IFT80</u>     | 1 | 1 | 0 | 1 | 0 | 0 | 1 | 1 | 0 | 1 | 6 |
| <u>TMEM181</u>   | 1 | 1 | 1 | 1 | 0 | 0 | 1 | 0 | 0 | 1 | 6 |
| <u>WDFY1</u>     | 1 | 1 | 0 | 1 | 0 | 0 | 1 | 1 | 0 | 1 | 6 |
| <u>SLAIN2</u>    | 1 | 1 | 1 | 1 | 0 | 0 | 1 | 0 | 0 | 1 | 6 |
| <u>KIAA1553</u>  | 1 | 1 | 1 | 1 | 0 | 0 | 1 | 0 | 0 | 1 | 6 |
| <u>ZFP14</u>     | 1 | 1 | 1 | 1 | 0 | 0 | 1 | 0 | 0 | 1 | 6 |
| <u>PTPRB</u>     | 1 | 1 | 1 | 1 | 0 | 0 | 1 | 0 | 0 | 1 | 6 |
| <u>MLL3</u>      | 1 | 1 | 1 | 1 | 0 | 0 | 1 | 0 | 0 | 1 | 6 |
| <u>SELK</u>      | 1 | 1 | 1 | 1 | 0 | 0 | 1 | 0 | 0 | 1 | 6 |
| <u>RBM25</u>     | 1 | 1 | 1 | 1 | 0 | 0 | 1 | 0 | 0 | 1 | 6 |
| <u>ACTA2</u>     | 1 | 1 | 0 | 1 | 0 | 0 | 1 | 0 | 1 | 1 | 6 |
| <u>SENP2</u>     | 1 | 1 | 0 | 1 | 1 | 0 | 1 | 0 | 0 | 1 | 6 |
| <u>GNB4</u>      | 1 | 1 | 1 | 1 | 0 | 0 | 1 | 0 | 0 | 1 | 6 |
| <u>PRPH2</u>     | 1 | 1 | 0 | 1 | 0 | 0 | 1 | 1 | 0 | 1 | 6 |
| <u>RFC1</u>      | 1 | 1 | 1 | 1 | 0 | 0 | 1 | 0 | 0 | 1 | 6 |
| <u>BCL6</u>      | 1 | 1 | 0 | 1 | 1 | 1 | 0 | 0 | 0 | 1 | 6 |
| <u>TGIF2</u>     | 1 | 1 | 1 | 1 | 0 | 0 | 1 | 0 | 0 | 1 | 6 |
| <u>RNF2</u>      | 1 | 1 | 0 | 1 | 1 | 0 | 1 | 0 | 0 | 1 | 6 |
| <u>MRPS35</u>    | 1 | 1 | 1 | 1 | 0 | 0 | 1 | 0 | 0 | 1 | 6 |
| <u>BCL7A</u>     | 1 | 1 | 0 | 1 | 1 | 1 | 1 | 0 | 0 | 0 | 6 |
| <u>SCOC</u>      | 1 | 0 | 1 | 1 | 1 | 0 | 1 | 0 | 0 | 1 | 6 |
| <u>ROBO2</u>     | 1 | 1 | 1 | 1 | 0 | 0 | 1 | 0 | 0 | 1 | 6 |
| <u>RPS6KA3</u>   | 1 | 1 | 1 | 1 | 0 | 0 | 1 | 0 | 0 | 1 | 6 |
| <u>RYR3</u>      | 1 | 1 | 1 | 1 | 0 | 0 | 1 | 0 | 0 | 1 | 6 |
| <u>SCD</u>       | 1 | 1 | 1 | 1 | 0 | 0 | 1 | 0 | 0 | 1 | 6 |
| <u>CCL22</u>     | 1 | 1 | 0 | 1 | 0 | 0 | 1 | 1 | 0 | 1 | 6 |
| <u>SH2D4A</u>    | 1 | 1 | 1 | 1 | 0 | 0 | 1 | 0 | 0 | 1 | 6 |
| <u>SELE</u>      | 1 | 1 | 0 | 1 | 0 | 0 | 1 | 1 | 0 | 1 | 6 |
| <u>RBM26</u>     | 1 | 1 | 1 | 1 | 0 | 0 | 1 | 0 | 0 | 1 | 6 |
| <u>ZFYVE20</u>   | 1 | 1 | 0 | 1 | 0 | 0 | 1 | 1 | 0 | 1 | 6 |
| <u>MAP2K4</u>    | 1 | 1 | 1 | 1 | 0 | 0 | 1 | 0 | 0 | 1 | 6 |
| <u>PAPD5</u>     | 1 | 1 | 1 | 1 | 0 | 0 | 1 | 0 | 0 | 1 | 6 |
| <u>XPO4</u>      | 1 | 1 | 0 | 1 | 1 | 0 | 1 | 0 | 0 | 1 | 6 |
| <u>RGS18</u>     | 1 | 1 | 1 | 1 | 0 | 0 | 1 | 0 | 0 | 1 | 6 |
| <u>TMEM168</u>   | 1 | 1 | 0 | 1 | 0 | 0 | 1 | 1 | 0 | 1 | 6 |
| <u>SUDS3</u>     | 1 | 1 | 1 | 1 | 0 | 0 | 1 | 0 | 0 | 1 | 6 |
| <u>C14orf135</u> | 1 | 1 | 1 | 1 | 0 | 0 | 1 | 0 | 0 | 1 | 6 |
| <u>ACBD3</u>     | 1 | 1 | 0 | 1 | 0 | 0 | 1 | 0 | 1 | 1 | 6 |

|                 |   |   |   |   |   |   |   |   |   |   |   |
|-----------------|---|---|---|---|---|---|---|---|---|---|---|
| <u>TNS3</u>     | 1 | 1 | 1 | 1 | 0 | 0 | 1 | 0 | 0 | 1 | 6 |
| <u>S100BPB</u>  | 1 | 1 | 0 | 1 | 1 | 0 | 1 | 0 | 0 | 1 | 6 |
| <u>IPPK</u>     | 1 | 1 | 0 | 1 | 0 | 0 | 1 | 1 | 0 | 1 | 6 |
| <u>C1orf149</u> | 1 | 1 | 0 | 1 | 1 | 0 | 1 | 0 | 0 | 1 | 6 |
| <u>REEP1</u>    | 1 | 1 | 1 | 1 | 0 | 0 | 1 | 0 | 0 | 1 | 6 |
| <u>SLC2A3</u>   | 1 | 1 | 0 | 1 | 1 | 0 | 1 | 0 | 0 | 1 | 6 |
| <u>SLC5A3</u>   | 1 | 1 | 1 | 1 | 0 | 0 | 1 | 0 | 0 | 1 | 6 |
| <u>SLC7A2</u>   | 1 | 1 | 1 | 1 | 0 | 0 | 1 | 0 | 0 | 1 | 6 |
| <u>SLC11A1</u>  | 1 | 1 | 1 | 1 | 0 | 0 | 1 | 0 | 0 | 1 | 6 |
| <u>BMPR2</u>    | 1 | 1 | 0 | 1 | 1 | 0 | 1 | 0 | 0 | 1 | 6 |
| <u>PLEKHA3</u>  | 1 | 1 | 1 | 1 | 0 | 0 | 1 | 0 | 0 | 1 | 6 |
| <u>PHACTR4</u>  | 1 | 1 | 1 | 1 | 0 | 0 | 1 | 0 | 0 | 1 | 6 |
| <u>TRAK2</u>    | 1 | 1 | 0 | 1 | 1 | 0 | 1 | 0 | 0 | 1 | 6 |
| <u>SNAP25</u>   | 1 | 1 | 0 | 1 | 0 | 0 | 1 | 0 | 1 | 1 | 6 |
| <u>SNAPC3</u>   | 1 | 1 | 1 | 1 | 0 | 0 | 1 | 0 | 0 | 1 | 6 |
| <u>SOX5</u>     | 1 | 1 | 0 | 1 | 1 | 1 | 0 | 0 | 0 | 1 | 6 |
| <u>SPOCK1</u>   | 1 | 1 | 1 | 1 | 0 | 0 | 1 | 0 | 0 | 1 | 6 |
| <u>SPP1</u>     | 1 | 1 | 1 | 1 | 0 | 0 | 1 | 0 | 0 | 1 | 6 |
| <u>SRPK2</u>    | 1 | 0 | 1 | 1 | 0 | 0 | 1 | 0 | 1 | 1 | 6 |
| <u>SSR3</u>     | 1 | 1 | 0 | 1 | 0 | 0 | 1 | 1 | 0 | 1 | 6 |
| <u>STCH</u>     | 1 | 1 | 0 | 1 | 0 | 0 | 1 | 1 | 0 | 1 | 6 |
| <u>SULT1C2</u>  | 1 | 1 | 1 | 1 | 0 | 0 | 1 | 0 | 0 | 1 | 6 |
| <u>TAF4</u>     | 1 | 1 | 0 | 1 | 0 | 0 | 1 | 0 | 1 | 1 | 6 |
| <u>TBCD</u>     | 1 | 1 | 1 | 1 | 0 | 0 | 1 | 0 | 0 | 1 | 6 |
| <u>TBL1X</u>    | 1 | 1 | 1 | 1 | 0 | 0 | 1 | 0 | 0 | 1 | 6 |
| <u>TGFBR1</u>   | 1 | 1 | 1 | 1 | 0 | 0 | 1 | 0 | 0 | 1 | 6 |
| <u>TLR4</u>     | 1 | 1 | 1 | 1 | 0 | 0 | 1 | 0 | 0 | 1 | 6 |
| <u>TSPAN8</u>   | 1 | 1 | 1 | 1 | 0 | 0 | 1 | 0 | 0 | 1 | 6 |
| <u>TMF1</u>     | 1 | 1 | 1 | 1 | 0 | 0 | 1 | 0 | 0 | 1 | 6 |
| <u>TNFAIP1</u>  | 1 | 1 | 1 | 1 | 0 | 0 | 1 | 0 | 0 | 1 | 6 |
| <u>TNFAIP6</u>  | 1 | 1 | 1 | 1 | 0 | 0 | 1 | 0 | 0 | 1 | 6 |
| <u>NR2C2</u>    | 1 | 1 | 1 | 1 | 0 | 0 | 1 | 0 | 0 | 1 | 6 |
| <u>TSG101</u>   | 1 | 1 | 0 | 1 | 0 | 0 | 1 | 0 | 1 | 1 | 6 |
| <u>DNAJC7</u>   | 1 | 1 | 0 | 1 | 0 | 0 | 1 | 0 | 1 | 1 | 6 |
| <u>TWIST1</u>   | 1 | 1 | 0 | 1 | 1 | 1 | 1 | 0 | 0 | 0 | 6 |
| <u>TNFSF4</u>   | 1 | 1 | 1 | 1 | 0 | 0 | 1 | 0 | 0 | 1 | 6 |
| <u>UBE2D1</u>   | 1 | 1 | 1 | 1 | 0 | 0 | 1 | 0 | 0 | 1 | 6 |
| <u>VBPI</u>     | 1 | 1 | 1 | 1 | 0 | 0 | 1 | 0 | 0 | 1 | 6 |
| <u>VIP</u>      | 1 | 1 | 1 | 1 | 0 | 0 | 1 | 0 | 0 | 1 | 6 |
| <u>ZNF14</u>    | 1 | 1 | 1 | 1 | 0 | 0 | 1 | 0 | 0 | 1 | 6 |
| <u>ZNF124</u>   | 1 | 1 | 1 | 1 | 0 | 0 | 1 | 0 | 0 | 1 | 6 |

|                 |   |   |   |   |   |   |   |   |   |   |   |
|-----------------|---|---|---|---|---|---|---|---|---|---|---|
| <u>PCGF2</u>    | 1 | 1 | 0 | 1 | 1 | 0 | 1 | 0 | 0 | 1 | 6 |
| <u>ZNF217</u>   | 1 | 1 | 1 | 1 | 0 | 0 | 1 | 0 | 0 | 1 | 6 |
| <u>GCS1</u>     | 1 | 1 | 0 | 1 | 0 | 0 | 1 | 0 | 1 | 1 | 6 |
| <u>C7orf24</u>  | 1 | 1 | 1 | 1 | 0 | 0 | 1 | 0 | 0 | 1 | 6 |
| <u>APOO</u>     | 1 | 1 | 0 | 1 | 0 | 0 | 1 | 0 | 1 | 1 | 6 |
| <u>CDC73</u>    | 1 | 1 | 0 | 1 | 1 | 0 | 1 | 0 | 0 | 1 | 6 |
| <u>OGFRL1</u>   | 1 | 1 | 1 | 1 | 0 | 0 | 1 | 0 | 0 | 1 | 6 |
| <u>SH3TC2</u>   | 1 | 1 | 1 | 1 | 0 | 0 | 1 | 0 | 0 | 1 | 6 |
| <u>PPP1R3B</u>  | 0 | 1 | 1 | 1 | 0 | 0 | 1 | 1 | 0 | 1 | 6 |
| <u>NARG2</u>    | 1 | 1 | 1 | 1 | 0 | 0 | 1 | 0 | 0 | 1 | 6 |
| <u>STEAP4</u>   | 1 | 1 | 1 | 1 | 0 | 0 | 1 | 0 | 0 | 1 | 6 |
| <u>NSUN7</u>    | 1 | 1 | 1 | 1 | 0 | 0 | 1 | 0 | 0 | 1 | 6 |
| <u>TXNDC15</u>  | 1 | 1 | 1 | 1 | 0 | 0 | 1 | 0 | 0 | 1 | 6 |
| <u>QSER1</u>    | 1 | 1 | 1 | 1 | 0 | 0 | 1 | 0 | 0 | 1 | 6 |
| <u>SGK269</u>   | 1 | 1 | 1 | 1 | 0 | 0 | 1 | 0 | 0 | 1 | 6 |
| <u>RPAP2</u>    | 1 | 1 | 1 | 1 | 0 | 0 | 1 | 0 | 0 | 1 | 6 |
| <u>CALCR</u>    | 1 | 1 | 1 | 1 | 0 | 0 | 1 | 0 | 0 | 1 | 6 |
| <u>TUSC3</u>    | 1 | 1 | 0 | 1 | 0 | 0 | 1 | 0 | 1 | 1 | 6 |
| <u>C2orf54</u>  | 1 | 1 | 1 | 1 | 0 | 0 | 1 | 0 | 0 | 1 | 6 |
| <u>PHC3</u>     | 1 | 1 | 1 | 1 | 0 | 0 | 1 | 0 | 0 | 1 | 6 |
| <u>NR4A3</u>    | 0 | 0 | 1 | 1 | 1 | 1 | 1 | 0 | 0 | 1 | 6 |
| <u>NR4A3</u>    | 1 | 1 | 0 | 1 | 1 | 1 | 0 | 0 | 0 | 1 | 6 |
| <u>NARG1</u>    | 1 | 1 | 0 | 1 | 1 | 0 | 1 | 0 | 0 | 1 | 6 |
| <u>MLLT10</u>   | 1 | 0 | 1 | 1 | 0 | 0 | 1 | 0 | 1 | 1 | 6 |
| <u>SHOC2</u>    | 1 | 1 | 0 | 1 | 0 | 0 | 1 | 1 | 0 | 1 | 6 |
| <u>SNIP</u>     | 1 | 1 | 0 | 1 | 0 | 0 | 1 | 0 | 1 | 1 | 6 |
| <u>KIAA1715</u> | 1 | 1 | 1 | 1 | 0 | 0 | 1 | 0 | 0 | 1 | 6 |
| <u>SLC25A32</u> | 1 | 1 | 1 | 1 | 0 | 0 | 1 | 0 | 0 | 1 | 6 |
| <u>FAM117A</u>  | 1 | 1 | 0 | 1 | 1 | 0 | 1 | 0 | 1 | 0 | 6 |
| <u>C1orf21</u>  | 1 | 1 | 0 | 1 | 0 | 0 | 1 | 1 | 0 | 1 | 6 |
| <u>VANGL1</u>   | 1 | 1 | 1 | 1 | 0 | 0 | 1 | 0 | 0 | 1 | 6 |
| <u>USP9X</u>    | 1 | 1 | 1 | 1 | 0 | 0 | 1 | 0 | 0 | 1 | 6 |
| <u>USP9Y</u>    | 1 | 1 | 1 | 1 | 0 | 0 | 1 | 0 | 0 | 1 | 6 |
| <u>TRRAP</u>    | 1 | 1 | 0 | 1 | 0 | 0 | 1 | 0 | 1 | 1 | 6 |
| <u>PICALM</u>   | 1 | 1 | 1 | 1 | 0 | 0 | 1 | 0 | 0 | 1 | 6 |
| <u>PCDH11Y</u>  | 1 | 1 | 1 | 1 | 0 | 0 | 1 | 0 | 0 | 1 | 6 |
| <u>THAP2</u>    | 1 | 1 | 1 | 1 | 0 | 0 | 1 | 0 | 0 | 1 | 6 |
| <u>NUDT12</u>   | 1 | 1 | 1 | 1 | 0 | 0 | 1 | 0 | 0 | 1 | 6 |
| <u>SOX7</u>     | 1 | 1 | 0 | 1 | 0 | 0 | 1 | 1 | 0 | 1 | 6 |
| <u>JAM3</u>     | 1 | 1 | 1 | 1 | 0 | 0 | 1 | 0 | 0 | 1 | 6 |
| <u>SYT15</u>    | 1 | 1 | 1 | 1 | 0 | 0 | 1 | 0 | 0 | 1 | 6 |

|                  |   |   |   |   |   |   |   |   |   |   |   |
|------------------|---|---|---|---|---|---|---|---|---|---|---|
| <u>SLC10A7</u>   | 1 | 1 | 1 | 1 | 0 | 0 | 1 | 0 | 0 | 1 | 6 |
| <u>USP42</u>     | 1 | 1 | 1 | 1 | 0 | 0 | 1 | 0 | 0 | 1 | 6 |
| <u>BTBD10</u>    | 1 | 1 | 0 | 1 | 0 | 0 | 1 | 0 | 1 | 1 | 6 |
| <u>ING5</u>      | 1 | 1 | 0 | 1 | 0 | 0 | 1 | 1 | 0 | 1 | 6 |
| <u>CASP10</u>    | 1 | 1 | 0 | 1 | 1 | 0 | 1 | 0 | 0 | 1 | 6 |
| <u>RECK</u>      | 1 | 1 | 0 | 1 | 1 | 0 | 1 | 0 | 0 | 1 | 6 |
| <u>HOOK3</u>     | 1 | 1 | 0 | 1 | 0 | 0 | 1 | 0 | 1 | 1 | 6 |
| <u>NSMAF</u>     | 1 | 0 | 0 | 1 | 1 | 0 | 1 | 0 | 1 | 1 | 6 |
| <u>C15orf48</u>  | 1 | 1 | 1 | 1 | 0 | 0 | 1 | 0 | 0 | 1 | 6 |
| <u>ZNF594</u>    | 1 | 1 | 1 | 1 | 0 | 0 | 1 | 0 | 0 | 1 | 6 |
| <u>OGT</u>       | 1 | 1 | 0 | 1 | 1 | 0 | 1 | 0 | 0 | 1 | 6 |
| <u>ZNF514</u>    | 1 | 1 | 1 | 1 | 0 | 0 | 1 | 0 | 0 | 1 | 6 |
| <u>NFATC2IP</u>  | 1 | 1 | 1 | 1 | 0 | 0 | 1 | 0 | 0 | 1 | 6 |
| <u>ZNF341</u>    | 1 | 1 | 0 | 1 | 0 | 0 | 1 | 0 | 1 | 1 | 6 |
| <u>ZNF382</u>    | 1 | 1 | 1 | 1 | 0 | 0 | 1 | 0 | 0 | 1 | 6 |
| <u>ALG10</u>     | 1 | 1 | 0 | 1 | 0 | 0 | 1 | 1 | 0 | 1 | 6 |
| <u>ABHD13</u>    | 1 | 1 | 1 | 1 | 0 | 0 | 1 | 0 | 0 | 1 | 6 |
| <u>LTV1</u>      | 1 | 1 | 1 | 1 | 0 | 0 | 1 | 0 | 0 | 1 | 6 |
| <u>PPFIA1</u>    | 1 | 1 | 1 | 1 | 0 | 0 | 1 | 0 | 0 | 1 | 6 |
| <u>GAS7</u>      | 1 | 1 | 1 | 1 | 0 | 0 | 1 | 0 | 0 | 1 | 6 |
| <u>CBX4</u>      | 1 | 1 | 1 | 1 | 0 | 0 | 1 | 0 | 0 | 1 | 6 |
| <u>API5</u>      | 1 | 1 | 0 | 1 | 1 | 0 | 1 | 0 | 0 | 1 | 6 |
| <u>DCLK3</u>     | 1 | 1 | 1 | 1 | 0 | 0 | 1 | 0 | 0 | 1 | 6 |
| <u>SSH2</u>      | 1 | 1 | 0 | 1 | 0 | 0 | 1 | 1 | 0 | 1 | 6 |
| <u>CDC14B</u>    | 1 | 1 | 1 | 1 | 0 | 0 | 1 | 0 | 0 | 1 | 6 |
| <u>PRPF18</u>    | 1 | 1 | 0 | 1 | 0 | 0 | 1 | 0 | 1 | 1 | 6 |
| <u>KMO</u>       | 1 | 1 | 0 | 1 | 0 | 0 | 1 | 0 | 1 | 1 | 6 |
| <u>PLA2G4C</u>   | 1 | 1 | 1 | 1 | 0 | 0 | 1 | 0 | 0 | 1 | 6 |
| <u>RUNX1</u>     | 1 | 0 | 0 | 1 | 1 | 1 | 1 | 0 | 0 | 1 | 6 |
| <u>RUNX1</u>     | 1 | 1 | 0 | 1 | 1 | 1 | 0 | 0 | 0 | 1 | 6 |
| <u>USO1</u>      | 1 | 1 | 1 | 1 | 0 | 0 | 1 | 0 | 0 | 1 | 6 |
| <u>TP63</u>      | 1 | 1 | 1 | 1 | 0 | 0 | 1 | 0 | 0 | 1 | 6 |
| <u>CBFA2T3</u>   | 1 | 1 | 0 | 1 | 1 | 0 | 1 | 0 | 0 | 1 | 6 |
| <u>PDE5A</u>     | 1 | 1 | 1 | 1 | 0 | 0 | 1 | 0 | 0 | 1 | 6 |
| <u>TNKS</u>      | 1 | 1 | 0 | 1 | 0 | 0 | 1 | 1 | 0 | 1 | 6 |
| <u>B3GALT1</u>   | 1 | 1 | 0 | 1 | 0 | 0 | 1 | 0 | 1 | 1 | 6 |
| <u>PNPT1</u>     | 1 | 1 | 1 | 1 | 0 | 0 | 1 | 0 | 0 | 1 | 6 |
| <u>RNMT</u>      | 1 | 1 | 1 | 1 | 0 | 0 | 1 | 0 | 0 | 1 | 6 |
| <u>TNFRSF10B</u> | 1 | 1 | 1 | 1 | 0 | 0 | 1 | 0 | 0 | 1 | 6 |
| <u>SUCLG2</u>    | 1 | 1 | 1 | 1 | 0 | 0 | 1 | 0 | 0 | 1 | 6 |
| <u>PER3</u>      | 1 | 1 | 1 | 1 | 0 | 0 | 1 | 0 | 0 | 1 | 6 |

|                  |   |   |   |   |   |   |   |   |   |   |   |
|------------------|---|---|---|---|---|---|---|---|---|---|---|
| <u>TIMELESS</u>  | 1 | 1 | 1 | 1 | 0 | 0 | 1 | 0 | 0 | 1 | 6 |
| <u>WASL</u>      | 1 | 1 | 1 | 1 | 0 | 0 | 1 | 0 | 0 | 1 | 6 |
| <u>FRMD7</u>     | 1 | 1 | 1 | 1 | 0 | 0 | 1 | 0 | 0 | 1 | 6 |
| <u>UNC5A</u>     | 1 | 1 | 0 | 1 | 0 | 0 | 1 | 0 | 1 | 1 | 6 |
| <u>RNF8</u>      | 1 | 1 | 1 | 1 | 0 | 0 | 1 | 0 | 0 | 1 | 6 |
| <u>FAM105B</u>   | 1 | 1 | 1 | 1 | 0 | 0 | 1 | 0 | 0 | 1 | 6 |
| <u>MAP7</u>      | 1 | 1 | 0 | 1 | 0 | 0 | 1 | 0 | 1 | 1 | 6 |
| <u>ZNF700</u>    | 1 | 1 | 1 | 1 | 0 | 0 | 1 | 0 | 0 | 1 | 6 |
| <u>ZNF439</u>    | 1 | 1 | 1 | 1 | 0 | 0 | 1 | 0 | 0 | 1 | 6 |
| <u>CCDC126</u>   | 1 | 1 | 0 | 1 | 0 | 0 | 1 | 1 | 0 | 1 | 6 |
| <u>CLDN8</u>     | 1 | 1 | 1 | 1 | 0 | 0 | 1 | 0 | 0 | 1 | 6 |
| <u>DIRAS3</u>    | 1 | 1 | 1 | 1 | 0 | 0 | 1 | 0 | 0 | 1 | 6 |
| <u>ZNF479</u>    | 1 | 1 | 1 | 1 | 0 | 0 | 1 | 0 | 0 | 1 | 6 |
| <u>C12orf29</u>  | 1 | 1 | 1 | 1 | 0 | 0 | 1 | 0 | 0 | 1 | 6 |
| <u>CD1E</u>      | 1 | 1 | 1 | 1 | 0 | 0 | 1 | 0 | 0 | 1 | 6 |
| <u>DDX60L</u>    | 1 | 1 | 1 | 1 | 0 | 0 | 1 | 0 | 0 | 1 | 6 |
| <u>ISX</u>       | 1 | 1 | 0 | 1 | 0 | 0 | 1 | 1 | 0 | 1 | 6 |
| <u>ATPAF2</u>    | 1 | 1 | 0 | 1 | 0 | 0 | 1 | 1 | 0 | 1 | 6 |
| <u>C14orf43</u>  | 1 | 0 | 1 | 1 | 1 | 0 | 1 | 0 | 0 | 1 | 6 |
| <u>ARRDC4</u>    | 1 | 1 | 1 | 1 | 0 | 0 | 1 | 0 | 0 | 1 | 6 |
| <u>RPS6KA5</u>   | 1 | 1 | 0 | 1 | 0 | 0 | 1 | 1 | 1 | 0 | 6 |
| <u>TIFA</u>      | 1 | 1 | 1 | 1 | 0 | 0 | 1 | 0 | 0 | 1 | 6 |
| <u>ADAMTSL1</u>  | 1 | 1 | 1 | 1 | 0 | 0 | 1 | 0 | 0 | 1 | 6 |
| <u>ACVR2B</u>    | 1 | 1 | 1 | 1 | 0 | 0 | 1 | 0 | 0 | 1 | 6 |
| <u>C5orf13</u>   | 1 | 0 | 0 | 1 | 1 | 1 | 1 | 0 | 0 | 1 | 6 |
| <u>MAPK1IP1L</u> | 1 | 1 | 1 | 1 | 0 | 0 | 1 | 0 | 0 | 1 | 6 |
| <u>CACNA2D4</u>  | 1 | 1 | 1 | 1 | 0 | 0 | 1 | 0 | 0 | 1 | 6 |
| <u>MGC21874</u>  | 1 | 1 | 1 | 1 | 0 | 0 | 1 | 0 | 0 | 1 | 6 |
| <u>ARHGAP18</u>  | 1 | 1 | 0 | 1 | 0 | 0 | 1 | 1 | 0 | 1 | 6 |
| <u>ARHGAP12</u>  | 1 | 1 | 0 | 1 | 0 | 0 | 1 | 0 | 1 | 1 | 6 |
| <u>CDYL</u>      | 1 | 1 | 0 | 1 | 1 | 1 | 0 | 0 | 0 | 1 | 6 |
| <u>CDYL</u>      | 0 | 0 | 1 | 1 | 1 | 1 | 1 | 0 | 0 | 1 | 6 |
| <u>MED20</u>     | 1 | 1 | 1 | 1 | 0 | 0 | 1 | 0 | 0 | 1 | 6 |
| <u>ONECUT2</u>   | 1 | 1 | 1 | 1 | 0 | 0 | 1 | 0 | 0 | 1 | 6 |
| <u>SLC4A8</u>    | 1 | 1 | 1 | 1 | 0 | 0 | 1 | 0 | 0 | 1 | 6 |
| <u>ADAMTS1</u>   | 1 | 1 | 0 | 1 | 1 | 0 | 1 | 0 | 0 | 1 | 6 |
| <u>EEF1E1</u>    | 1 | 1 | 0 | 1 | 0 | 0 | 1 | 0 | 1 | 1 | 6 |
| <u>BAG4</u>      | 1 | 1 | 1 | 1 | 0 | 0 | 1 | 0 | 0 | 1 | 6 |
| <u>BAG2</u>      | 1 | 1 | 1 | 1 | 0 | 0 | 1 | 0 | 0 | 1 | 6 |
| <u>CREB5</u>     | 1 | 1 | 1 | 1 | 0 | 0 | 1 | 0 | 0 | 1 | 6 |
| <u>SEC24C</u>    | 1 | 1 | 0 | 1 | 1 | 1 | 0 | 0 | 0 | 1 | 6 |

|                  |   |   |   |   |   |   |   |   |   |   |   |
|------------------|---|---|---|---|---|---|---|---|---|---|---|
| <u>MTL5</u>      | 1 | 1 | 0 | 1 | 0 | 0 | 1 | 1 | 0 | 1 | 6 |
| <u>GCC2</u>      | 1 | 1 | 1 | 1 | 0 | 0 | 1 | 0 | 0 | 1 | 6 |
| <u>HS2ST1</u>    | 1 | 1 | 0 | 1 | 0 | 0 | 1 | 0 | 1 | 1 | 6 |
| <u>WSCD2</u>     | 1 | 1 | 0 | 1 | 0 | 0 | 1 | 1 | 0 | 1 | 6 |
| <u>CD69</u>      | 1 | 1 | 1 | 1 | 0 | 0 | 1 | 0 | 0 | 1 | 6 |
| <u>ACYP1</u>     | 1 | 1 | 1 | 1 | 0 | 0 | 1 | 0 | 0 | 1 | 6 |
| <u>KIAA0226</u>  | 1 | 1 | 0 | 1 | 0 | 0 | 1 | 1 | 0 | 1 | 6 |
| <u>DOCK4</u>     | 1 | 1 | 1 | 1 | 0 | 0 | 1 | 0 | 0 | 1 | 6 |
| <u>SLK</u>       | 1 | 1 | 1 | 1 | 0 | 0 | 1 | 0 | 0 | 1 | 6 |
| <u>PHACTR2</u>   | 1 | 1 | 1 | 1 | 0 | 0 | 1 | 0 | 0 | 1 | 6 |
| <u>KIAA0247</u>  | 1 | 1 | 1 | 1 | 0 | 0 | 1 | 0 | 0 | 1 | 6 |
| <u>RAPGEF5</u>   | 1 | 1 | 0 | 1 | 0 | 0 | 1 | 1 | 0 | 1 | 6 |
| <u>BCLAF1</u>    | 1 | 1 | 0 | 1 | 1 | 0 | 1 | 0 | 0 | 1 | 6 |
| <u>ARHGEF17</u>  | 1 | 1 | 0 | 1 | 0 | 0 | 1 | 0 | 1 | 1 | 6 |
| <u>TBC1D4</u>    | 1 | 1 | 1 | 1 | 0 | 0 | 1 | 0 | 0 | 1 | 6 |
| <u>OSBPL2</u>    | 1 | 1 | 1 | 1 | 0 | 0 | 1 | 0 | 0 | 1 | 6 |
| <u>LPGAT1</u>    | 1 | 1 | 1 | 1 | 0 | 0 | 1 | 0 | 0 | 1 | 6 |
| <u>CDC25A</u>    | 1 | 1 | 0 | 1 | 0 | 0 | 1 | 1 | 0 | 1 | 6 |
| <u>NR1D2</u>     | 1 | 1 | 0 | 1 | 1 | 0 | 1 | 0 | 0 | 1 | 6 |
| <u>DUSP5</u>     | 1 | 1 | 0 | 0 | 1 | 1 | 1 | 0 | 0 | 1 | 6 |
| <u>GOT2</u>      | 1 | 1 | 0 | 0 | 0 | 0 | 1 | 1 | 1 | 1 | 6 |
| <u>FAM126B</u>   | 1 | 1 | 0 | 0 | 1 | 1 | 1 | 0 | 0 | 1 | 6 |
| <u>LOC388272</u> | 1 | 1 | 1 | 0 | 1 | 0 | 1 | 0 | 0 | 1 | 6 |
| <u>PRKCD</u>     | 1 | 0 | 1 | 0 | 1 | 1 | 1 | 0 | 0 | 1 | 6 |
| <u>SIPA1L2</u>   | 1 | 1 | 1 | 0 | 0 | 0 | 1 | 0 | 1 | 1 | 6 |
| <u>PTPN9</u>     | 1 | 1 | 1 | 0 | 1 | 0 | 1 | 0 | 0 | 1 | 6 |
| <u>PTBP2</u>     | 1 | 1 | 1 | 0 | 0 | 0 | 1 | 0 | 1 | 1 | 6 |
| <u>AASDHPPT</u>  | 1 | 1 | 1 | 0 | 0 | 0 | 1 | 1 | 0 | 1 | 6 |
| <u>PAPOLG</u>    | 1 | 1 | 1 | 0 | 1 | 0 | 1 | 0 | 0 | 1 | 6 |
| <u>RAPH1</u>     | 1 | 1 | 0 | 0 | 1 | 1 | 1 | 0 | 0 | 1 | 6 |
| <u>HSP90B1</u>   | 1 | 1 | 1 | 0 | 1 | 0 | 1 | 0 | 0 | 1 | 6 |
| <u>PGAP1</u>     | 1 | 1 | 1 | 0 | 0 | 0 | 1 | 1 | 0 | 1 | 6 |
| <u>FBXO11</u>    | 1 | 1 | 0 | 0 | 1 | 1 | 1 | 0 | 0 | 1 | 6 |
| <u>RAB11A</u>    | 1 | 1 | 1 | 0 | 1 | 0 | 1 | 0 | 0 | 1 | 6 |
| <u>C21orf66</u>  | 1 | 1 | 1 | 0 | 0 | 0 | 1 | 0 | 1 | 1 | 6 |
| <u>PCDHA3</u>    | 0 | 1 | 1 | 0 | 1 | 1 | 1 | 0 | 0 | 1 | 6 |
| <u>CDH2</u>      | 1 | 1 | 0 | 1 | 1 | 1 | 0 | 0 | 0 | 0 | 5 |
| <u>AKT3</u>      | 1 | 1 | 0 | 1 | 1 | 0 | 0 | 0 | 0 | 1 | 5 |
| <u>BCL2L11</u>   | 1 | 1 | 0 | 1 | 1 | 0 | 0 | 0 | 0 | 1 | 5 |
| <u>TOM1L1</u>    | 1 | 1 | 0 | 1 | 1 | 0 | 0 | 0 | 0 | 1 | 5 |
| <u>PDIA6</u>     | 1 | 1 | 0 | 1 | 1 | 0 | 0 | 0 | 0 | 1 | 5 |

|                 |   |   |   |   |   |   |   |   |   |   |   |
|-----------------|---|---|---|---|---|---|---|---|---|---|---|
| <u>MBNL2</u>    | 1 | 1 | 0 | 1 | 1 | 0 | 0 | 0 | 0 | 1 | 5 |
| <u>CTDSPL</u>   | 1 | 0 | 0 | 1 | 1 | 1 | 0 | 0 | 0 | 1 | 5 |
| <u>ADARB1</u>   | 1 | 1 | 0 | 1 | 1 | 0 | 0 | 0 | 0 | 1 | 5 |
| <u>PIAS3</u>    | 1 | 1 | 0 | 1 | 1 | 0 | 0 | 0 | 0 | 1 | 5 |
| <u>CARM1</u>    | 1 | 1 | 0 | 1 | 1 | 0 | 0 | 0 | 0 | 1 | 5 |
| <u>NCOA2</u>    | 0 | 1 | 0 | 1 | 1 | 1 | 0 | 0 | 0 | 1 | 5 |
| <u>IPO8</u>     | 1 | 1 | 0 | 1 | 1 | 0 | 0 | 0 | 0 | 1 | 5 |
| <u>AGPAT1</u>   | 1 | 1 | 0 | 1 | 1 | 0 | 0 | 0 | 0 | 1 | 5 |
| <u>ARFGEF2</u>  | 1 | 1 | 0 | 1 | 1 | 0 | 0 | 0 | 0 | 1 | 5 |
| <u>C1orf2</u>   | 1 | 1 | 0 | 1 | 1 | 0 | 0 | 0 | 0 | 1 | 5 |
| <u>NFAT5</u>    | 1 | 1 | 0 | 1 | 1 | 0 | 0 | 0 | 0 | 1 | 5 |
| <u>SIX2</u>     | 1 | 1 | 0 | 1 | 1 | 0 | 0 | 0 | 0 | 1 | 5 |
| <u>PPARGC1A</u> | 1 | 1 | 0 | 1 | 1 | 1 | 0 | 0 | 0 | 0 | 5 |
| <u>ESM1</u>     | 0 | 1 | 0 | 1 | 1 | 1 | 0 | 0 | 0 | 1 | 5 |
| <u>BAZ2A</u>    | 1 | 1 | 0 | 1 | 1 | 0 | 0 | 0 | 0 | 1 | 5 |
| <u>KLHL2</u>    | 1 | 0 | 0 | 1 | 1 | 1 | 0 | 0 | 0 | 1 | 5 |
| <u>TRIM9</u>    | 1 | 1 | 0 | 1 | 1 | 0 | 0 | 0 | 0 | 1 | 5 |
| <u>SLC25A25</u> | 1 | 0 | 0 | 1 | 1 | 1 | 0 | 0 | 0 | 1 | 5 |
| <u>OSBPL8</u>   | 1 | 1 | 0 | 1 | 1 | 0 | 0 | 0 | 0 | 1 | 5 |
| <u>ADCY9</u>    | 1 | 1 | 0 | 1 | 1 | 0 | 0 | 0 | 0 | 1 | 5 |
| <u>C10orf78</u> | 1 | 1 | 0 | 1 | 1 | 0 | 0 | 0 | 0 | 1 | 5 |
| <u>MBOAT2</u>   | 1 | 1 | 0 | 1 | 1 | 0 | 0 | 0 | 0 | 1 | 5 |
| <u>COL16A1</u>  | 1 | 1 | 0 | 1 | 1 | 0 | 0 | 0 | 0 | 1 | 5 |
| <u>KLF6</u>     | 0 | 1 | 0 | 1 | 1 | 1 | 0 | 0 | 0 | 1 | 5 |
| <u>CPEB2</u>    | 1 | 0 | 0 | 1 | 1 | 1 | 0 | 0 | 0 | 1 | 5 |
| <u>ANKRD43</u>  | 1 | 1 | 0 | 1 | 1 | 0 | 0 | 0 | 0 | 1 | 5 |
| <u>CPD</u>      | 1 | 1 | 0 | 1 | 1 | 0 | 0 | 0 | 0 | 1 | 5 |
| <u>MTPN</u>     | 1 | 1 | 0 | 1 | 1 | 0 | 0 | 0 | 0 | 1 | 5 |
| <u>CREB1</u>    | 1 | 0 | 0 | 1 | 1 | 1 | 0 | 0 | 0 | 1 | 5 |
| <u>CREBBP</u>   | 1 | 1 | 0 | 1 | 1 | 0 | 0 | 0 | 0 | 1 | 5 |
| <u>CNTN4</u>    | 1 | 1 | 0 | 1 | 1 | 0 | 0 | 0 | 0 | 1 | 5 |
| <u>CAMSAP1</u>  | 1 | 1 | 0 | 1 | 1 | 0 | 0 | 0 | 0 | 1 | 5 |
| <u>APIG1</u>    | 1 | 1 | 0 | 1 | 1 | 0 | 0 | 0 | 0 | 1 | 5 |
| <u>DLX1</u>     | 1 | 1 | 0 | 1 | 1 | 1 | 0 | 0 | 0 | 0 | 5 |
| <u>DYNC1L12</u> | 1 | 1 | 0 | 1 | 1 | 0 | 0 | 0 | 0 | 1 | 5 |
| <u>DTNA</u>     | 1 | 1 | 0 | 1 | 1 | 0 | 0 | 0 | 0 | 1 | 5 |
| <u>EEF1A1</u>   | 1 | 1 | 0 | 1 | 1 | 1 | 0 | 0 | 0 | 0 | 5 |
| <u>EGR3</u>     | 1 | 1 | 0 | 1 | 1 | 0 | 0 | 0 | 0 | 1 | 5 |
| <u>EN1</u>      | 1 | 1 | 0 | 1 | 1 | 0 | 0 | 0 | 0 | 1 | 5 |
| <u>EPS8</u>     | 1 | 1 | 0 | 1 | 1 | 0 | 0 | 0 | 0 | 1 | 5 |
| <u>EYA4</u>     | 1 | 1 | 0 | 1 | 1 | 0 | 0 | 0 | 0 | 1 | 5 |

|                  |   |   |   |   |   |   |   |   |   |   |   |
|------------------|---|---|---|---|---|---|---|---|---|---|---|
| <u>ESR1</u>      | 1 | 0 | 0 | 1 | 1 | 1 | 0 | 0 | 0 | 1 | 5 |
| <u>ETF1</u>      | 1 | 1 | 0 | 1 | 1 | 0 | 0 | 0 | 0 | 1 | 5 |
| <u>EYA1</u>      | 1 | 0 | 0 | 1 | 1 | 1 | 0 | 0 | 0 | 1 | 5 |
| <u>EYA1</u>      | 1 | 0 | 0 | 1 | 1 | 1 | 0 | 0 | 0 | 1 | 5 |
| <u>EYA1</u>      | 1 | 0 | 0 | 1 | 1 | 1 | 0 | 0 | 0 | 1 | 5 |
| <u>ACSL1</u>     | 1 | 1 | 0 | 1 | 1 | 0 | 0 | 0 | 0 | 1 | 5 |
| <u>BPTF</u>      | 1 | 0 | 0 | 1 | 1 | 1 | 0 | 0 | 0 | 1 | 5 |
| <u>FBN2</u>      | 1 | 1 | 0 | 1 | 1 | 0 | 0 | 0 | 0 | 1 | 5 |
| <u>ARL5B</u>     | 1 | 1 | 0 | 1 | 1 | 0 | 0 | 0 | 0 | 1 | 5 |
| <u>FKBP1A</u>    | 1 | 1 | 0 | 1 | 1 | 0 | 0 | 0 | 0 | 1 | 5 |
| <u>PHLDA1</u>    | 1 | 1 | 0 | 1 | 1 | 0 | 0 | 0 | 0 | 1 | 5 |
| <u>USP33</u>     | 1 | 1 | 0 | 1 | 1 | 0 | 0 | 0 | 0 | 1 | 5 |
| <u>DOPEY1</u>    | 1 | 1 | 0 | 1 | 1 | 0 | 0 | 0 | 0 | 1 | 5 |
| <u>KIAA0423</u>  | 1 | 1 | 0 | 1 | 1 | 0 | 0 | 0 | 0 | 1 | 5 |
| <u>RTF1</u>      | 1 | 1 | 0 | 1 | 1 | 0 | 0 | 0 | 0 | 1 | 5 |
| <u>GPD1L</u>     | 1 | 1 | 0 | 1 | 1 | 0 | 0 | 0 | 0 | 1 | 5 |
| <u>KANK1</u>     | 1 | 0 | 0 | 1 | 1 | 1 | 0 | 0 | 0 | 1 | 5 |
| <u>KIAA0182</u>  | 1 | 1 | 0 | 1 | 1 | 0 | 0 | 0 | 0 | 1 | 5 |
| <u>TBC1D1</u>    | 1 | 1 | 0 | 1 | 1 | 0 | 0 | 0 | 0 | 1 | 5 |
| <u>HISPPD1</u>   | 1 | 1 | 0 | 1 | 1 | 0 | 0 | 0 | 0 | 1 | 5 |
| <u>DNAJC13</u>   | 1 | 1 | 0 | 1 | 1 | 0 | 0 | 0 | 0 | 1 | 5 |
| <u>SYNE1</u>     | 0 | 1 | 0 | 1 | 1 | 1 | 0 | 0 | 0 | 1 | 5 |
| <u>PHF3</u>      | 1 | 1 | 0 | 1 | 1 | 0 | 0 | 0 | 0 | 1 | 5 |
| <u>CBX7</u>      | 1 | 1 | 0 | 1 | 1 | 0 | 0 | 0 | 0 | 1 | 5 |
| <u>CENTB2</u>    | 1 | 1 | 0 | 1 | 1 | 0 | 0 | 0 | 0 | 1 | 5 |
| <u>ZNF281</u>    | 1 | 1 | 0 | 1 | 1 | 1 | 0 | 0 | 0 | 0 | 5 |
| <u>LYCAT</u>     | 1 | 0 | 0 | 1 | 1 | 1 | 0 | 0 | 0 | 1 | 5 |
| <u>NAALADL2</u>  | 1 | 1 | 0 | 1 | 1 | 0 | 0 | 0 | 0 | 1 | 5 |
| <u>GABRA1</u>    | 1 | 0 | 0 | 1 | 1 | 1 | 0 | 0 | 0 | 1 | 5 |
| <u>MAP3K7IP3</u> | 1 | 1 | 0 | 1 | 1 | 0 | 0 | 0 | 0 | 1 | 5 |
| <u>GALNT1</u>    | 1 | 1 | 0 | 1 | 1 | 0 | 0 | 0 | 0 | 1 | 5 |
| <u>ABI3BP</u>    | 1 | 1 | 0 | 1 | 1 | 0 | 0 | 0 | 0 | 1 | 5 |
| <u>GPR124</u>    | 1 | 1 | 0 | 1 | 1 | 1 | 0 | 0 | 0 | 0 | 5 |
| <u>OSBPL3</u>    | 1 | 0 | 0 | 1 | 1 | 1 | 0 | 0 | 0 | 1 | 5 |
| <u>OSBPL3</u>    | 1 | 0 | 0 | 1 | 1 | 1 | 0 | 0 | 0 | 1 | 5 |
| <u>OSBPL3</u>    | 1 | 0 | 0 | 1 | 1 | 1 | 0 | 0 | 0 | 1 | 5 |
| <u>WSB1</u>      | 1 | 1 | 0 | 1 | 1 | 0 | 0 | 0 | 0 | 1 | 5 |
| <u>LRRC32</u>    | 1 | 1 | 0 | 1 | 1 | 0 | 0 | 0 | 0 | 1 | 5 |
| <u>ARL5A</u>     | 1 | 1 | 0 | 1 | 1 | 0 | 0 | 0 | 0 | 1 | 5 |
| <u>SACS</u>      | 1 | 1 | 0 | 1 | 1 | 0 | 0 | 0 | 0 | 1 | 5 |
| <u>GATM</u>      | 1 | 1 | 0 | 1 | 1 | 0 | 0 | 0 | 0 | 1 | 5 |



|                |   |   |   |   |   |   |   |   |   |   |   |
|----------------|---|---|---|---|---|---|---|---|---|---|---|
| <u>NR6A1</u>   | 1 | 0 | 0 | 1 | 1 | 1 | 0 | 0 | 0 | 1 | 5 |
| <u>GREM1</u>   | 1 | 1 | 0 | 1 | 1 | 0 | 0 | 0 | 0 | 1 | 5 |
| <u>B4GALT1</u> | 1 | 1 | 0 | 1 | 1 | 0 | 0 | 0 | 0 | 1 | 5 |
| <u>RABGEF1</u> | 1 | 1 | 0 | 1 | 1 | 0 | 0 | 0 | 0 | 1 | 5 |
| <u>GOLGA1</u>  | 1 | 1 | 0 | 1 | 1 | 0 | 0 | 0 | 0 | 1 | 5 |
| <u>ZNF615</u>  | 1 | 1 | 0 | 1 | 1 | 0 | 0 | 0 | 0 | 1 | 5 |
| <u>ANGPT2</u>  | 1 | 1 | 0 | 1 | 1 | 0 | 0 | 0 | 0 | 1 | 5 |
| <u>ATP11C</u>  | 1 | 1 | 0 | 1 | 1 | 0 | 0 | 0 | 0 | 1 | 5 |
| <u>NR3C1</u>   | 1 | 0 | 0 | 1 | 1 | 1 | 0 | 0 | 0 | 1 | 5 |
| <u>SENP1</u>   | 1 | 1 | 0 | 1 | 1 | 0 | 0 | 0 | 0 | 1 | 5 |
| <u>HOXB5</u>   | 1 | 1 | 0 | 1 | 1 | 0 | 0 | 0 | 0 | 1 | 5 |
| <u>HOXC8</u>   | 1 | 1 | 0 | 1 | 1 | 0 | 0 | 0 | 0 | 1 | 5 |
| <u>RSPO2</u>   | 1 | 1 | 0 | 1 | 1 | 0 | 0 | 0 | 0 | 1 | 5 |
| <u>CYR61</u>   | 1 | 1 | 0 | 1 | 1 | 0 | 0 | 0 | 0 | 1 | 5 |
| <u>IL1A</u>    | 1 | 1 | 0 | 1 | 1 | 0 | 0 | 0 | 0 | 1 | 5 |
| <u>ITGA3</u>   | 1 | 1 | 0 | 1 | 1 | 0 | 0 | 0 | 0 | 1 | 5 |
| <u>ITGA3</u>   | 1 | 1 | 0 | 1 | 1 | 0 | 0 | 0 | 0 | 1 | 5 |
| <u>ITGB8</u>   | 1 | 1 | 0 | 1 | 1 | 0 | 0 | 0 | 0 | 1 | 5 |
| <u>ZC3H6</u>   | 1 | 1 | 0 | 1 | 1 | 0 | 0 | 0 | 0 | 1 | 5 |
| <u>KPNA1</u>   | 1 | 1 | 0 | 1 | 1 | 0 | 0 | 0 | 0 | 1 | 5 |
| <u>LBR</u>     | 1 | 1 | 0 | 1 | 1 | 0 | 0 | 0 | 0 | 1 | 5 |
| <u>LPP</u>     | 1 | 1 | 0 | 1 | 1 | 0 | 0 | 0 | 0 | 1 | 5 |
| <u>SMAD7</u>   | 1 | 1 | 0 | 1 | 1 | 0 | 0 | 0 | 0 | 1 | 5 |
| <u>MAT2A</u>   | 1 | 1 | 0 | 1 | 1 | 0 | 0 | 0 | 0 | 1 | 5 |
| <u>ADAM11</u>  | 1 | 1 | 0 | 1 | 1 | 0 | 0 | 0 | 0 | 1 | 5 |
| <u>MEIS2</u>   | 1 | 1 | 0 | 1 | 1 | 1 | 0 | 0 | 0 | 0 | 5 |
| <u>MEIS2</u>   | 1 | 1 | 0 | 1 | 1 | 1 | 0 | 0 | 0 | 0 | 5 |
| <u>MAP3K3</u>  | 1 | 0 | 0 | 1 | 1 | 1 | 0 | 0 | 0 | 1 | 5 |
| <u>MAP3K10</u> | 1 | 1 | 0 | 1 | 1 | 0 | 0 | 0 | 0 | 1 | 5 |
| <u>AFF1</u>    | 1 | 1 | 0 | 1 | 1 | 0 | 0 | 0 | 0 | 1 | 5 |
| <u>MMP14</u>   | 1 | 1 | 0 | 1 | 1 | 0 | 0 | 0 | 0 | 1 | 5 |
| <u>MYH10</u>   | 1 | 1 | 0 | 1 | 1 | 0 | 0 | 0 | 0 | 1 | 5 |
| <u>ATP1B1</u>  | 0 | 1 | 0 | 1 | 1 | 1 | 0 | 0 | 0 | 1 | 5 |
| <u>ATP1B1</u>  | 1 | 0 | 0 | 1 | 1 | 1 | 0 | 0 | 0 | 1 | 5 |
| <u>ATP2B1</u>  | 1 | 1 | 0 | 1 | 1 | 0 | 0 | 0 | 0 | 1 | 5 |
| <u>ATP2B1</u>  | 1 | 1 | 0 | 1 | 1 | 0 | 0 | 0 | 0 | 1 | 5 |
| <u>ATP2B2</u>  | 1 | 0 | 0 | 1 | 1 | 1 | 0 | 0 | 0 | 1 | 5 |
| <u>MINK1</u>   | 1 | 1 | 0 | 1 | 1 | 0 | 0 | 0 | 0 | 1 | 5 |
| <u>PAM</u>     | 1 | 0 | 0 | 1 | 1 | 1 | 0 | 0 | 0 | 1 | 5 |
| <u>PAM</u>     | 1 | 0 | 0 | 1 | 1 | 1 | 0 | 0 | 0 | 1 | 5 |
| <u>PAWR</u>    | 1 | 1 | 0 | 1 | 1 | 0 | 0 | 0 | 0 | 1 | 5 |

|                 |   |   |   |   |   |   |   |   |   |   |   |
|-----------------|---|---|---|---|---|---|---|---|---|---|---|
| <u>C5orf5</u>   | 1 | 1 | 0 | 1 | 1 | 1 | 0 | 0 | 0 | 0 | 5 |
| <u>MEX3C</u>    | 1 | 1 | 0 | 1 | 1 | 0 | 0 | 0 | 0 | 1 | 5 |
| <u>YTHDF2</u>   | 1 | 1 | 0 | 1 | 1 | 0 | 0 | 0 | 0 | 1 | 5 |
| <u>TAF9B</u>    | 1 | 1 | 0 | 1 | 1 | 0 | 0 | 0 | 0 | 1 | 5 |
| <u>CAB39</u>    | 1 | 1 | 0 | 1 | 1 | 1 | 0 | 0 | 0 | 0 | 5 |
| <u>SERPINB5</u> | 1 | 1 | 0 | 1 | 1 | 0 | 0 | 0 | 0 | 1 | 5 |
| <u>PKNOX1</u>   | 1 | 1 | 0 | 1 | 1 | 0 | 0 | 0 | 0 | 1 | 5 |
| <u>PLAG1</u>    | 1 | 0 | 0 | 1 | 1 | 1 | 0 | 0 | 0 | 1 | 5 |
| <u>PLS1</u>     | 1 | 1 | 0 | 1 | 1 | 0 | 0 | 0 | 0 | 1 | 5 |
| <u>CSNK1G1</u>  | 1 | 1 | 0 | 1 | 1 | 0 | 0 | 0 | 0 | 1 | 5 |
| <u>DCUN1D1</u>  | 1 | 1 | 0 | 1 | 1 | 0 | 0 | 0 | 0 | 1 | 5 |
| <u>KCNK10</u>   | 1 | 1 | 0 | 1 | 1 | 0 | 0 | 0 | 0 | 1 | 5 |
| <u>KIAA1128</u> | 1 | 1 | 0 | 1 | 1 | 0 | 0 | 0 | 0 | 1 | 5 |
| <u>RBM47</u>    | 1 | 0 | 0 | 1 | 1 | 1 | 0 | 0 | 0 | 1 | 5 |
| <u>EPB41L4B</u> | 1 | 1 | 0 | 1 | 1 | 0 | 0 | 0 | 0 | 1 | 5 |
| <u>CCNJ</u>     | 1 | 0 | 0 | 1 | 1 | 1 | 0 | 0 | 0 | 1 | 5 |
| <u>RSBN1</u>    | 1 | 1 | 0 | 1 | 1 | 0 | 0 | 0 | 0 | 1 | 5 |
| <u>AFTPH</u>    | 1 | 0 | 0 | 1 | 1 | 1 | 0 | 0 | 0 | 1 | 5 |
| <u>ZNF280D</u>  | 1 | 1 | 0 | 1 | 1 | 0 | 0 | 0 | 0 | 1 | 5 |
| <u>FLJ20160</u> | 1 | 1 | 0 | 1 | 1 | 0 | 0 | 0 | 0 | 1 | 5 |
| <u>SEMA4C</u>   | 1 | 1 | 0 | 1 | 1 | 0 | 0 | 0 | 0 | 1 | 5 |
| <u>TMEM16A</u>  | 1 | 1 | 0 | 1 | 1 | 0 | 0 | 0 | 0 | 1 | 5 |
| <u>PLEKHJ1</u>  | 1 | 1 | 0 | 1 | 1 | 0 | 0 | 0 | 0 | 1 | 5 |
| <u>LRRC8D</u>   | 1 | 1 | 0 | 1 | 1 | 0 | 0 | 0 | 0 | 1 | 5 |
| <u>MSL2L1</u>   | 1 | 1 | 0 | 1 | 1 | 0 | 0 | 0 | 0 | 1 | 5 |
| <u>PPP2R2C</u>  | 1 | 0 | 0 | 1 | 1 | 1 | 0 | 0 | 0 | 1 | 5 |
| <u>LIN7C</u>    | 1 | 1 | 0 | 1 | 1 | 0 | 0 | 0 | 0 | 1 | 5 |
| <u>PPP3R1</u>   | 0 | 1 | 0 | 1 | 1 | 1 | 0 | 0 | 0 | 1 | 5 |
| <u>STRBP</u>    | 1 | 1 | 0 | 1 | 1 | 1 | 0 | 0 | 0 | 0 | 5 |
| <u>SOX6</u>     | 1 | 0 | 0 | 1 | 1 | 1 | 0 | 0 | 0 | 1 | 5 |
| <u>CDKN2AIP</u> | 1 | 1 | 0 | 1 | 1 | 0 | 0 | 0 | 0 | 1 | 5 |
| <u>PNRC2</u>    | 1 | 1 | 0 | 1 | 1 | 0 | 0 | 0 | 0 | 1 | 5 |
| <u>RBM22</u>    | 1 | 1 | 0 | 1 | 1 | 0 | 0 | 0 | 0 | 1 | 5 |
| <u>LMO3</u>     | 1 | 0 | 0 | 1 | 1 | 1 | 0 | 0 | 0 | 1 | 5 |
| <u>SEPT3</u>    | 1 | 1 | 0 | 1 | 1 | 0 | 0 | 0 | 0 | 1 | 5 |
| <u>MAP2K1</u>   | 1 | 1 | 0 | 1 | 1 | 0 | 0 | 0 | 0 | 1 | 5 |
| <u>PCDHAC2</u>  | 0 | 1 | 0 | 1 | 1 | 1 | 0 | 0 | 0 | 1 | 5 |
| <u>PCDHAC1</u>  | 0 | 1 | 0 | 1 | 1 | 1 | 0 | 0 | 0 | 1 | 5 |
| <u>PCDHA10</u>  | 0 | 1 | 0 | 1 | 1 | 1 | 0 | 0 | 0 | 1 | 5 |
| <u>PCDHA10</u>  | 0 | 1 | 0 | 1 | 1 | 1 | 0 | 0 | 0 | 1 | 5 |
| <u>PCDHA5</u>   | 0 | 1 | 0 | 1 | 1 | 1 | 0 | 0 | 0 | 1 | 5 |

|                 |   |   |   |   |   |   |   |   |   |   |   |
|-----------------|---|---|---|---|---|---|---|---|---|---|---|
| <u>PCDHA2</u>   | 0 | 1 | 0 | 1 | 1 | 1 | 0 | 0 | 0 | 1 | 5 |
| <u>PSAP</u>     | 1 | 1 | 0 | 1 | 1 | 0 | 0 | 0 | 0 | 1 | 5 |
| <u>INPP5E</u>   | 1 | 1 | 0 | 1 | 1 | 0 | 0 | 0 | 0 | 1 | 5 |
| <u>TRIM39</u>   | 1 | 1 | 0 | 1 | 1 | 0 | 0 | 0 | 0 | 1 | 5 |
| <u>RGMA</u>     | 1 | 1 | 0 | 1 | 1 | 0 | 0 | 0 | 0 | 1 | 5 |
| <u>TULP4</u>    | 1 | 1 | 0 | 1 | 1 | 0 | 0 | 0 | 0 | 1 | 5 |
| <u>PCNP</u>     | 1 | 1 | 0 | 1 | 1 | 0 | 0 | 0 | 0 | 1 | 5 |
| <u>PEL1</u>     | 1 | 1 | 0 | 1 | 1 | 1 | 0 | 0 | 0 | 0 | 5 |
| <u>DPP10</u>    | 1 | 1 | 0 | 1 | 1 | 0 | 0 | 0 | 0 | 1 | 5 |
| <u>ZBTB4</u>    | 1 | 1 | 0 | 1 | 1 | 0 | 0 | 0 | 0 | 1 | 5 |
| <u>SEMA4G</u>   | 1 | 1 | 0 | 1 | 1 | 0 | 0 | 0 | 0 | 1 | 5 |
| <u>RBBP7</u>    | 1 | 1 | 0 | 1 | 1 | 0 | 0 | 0 | 0 | 1 | 5 |
| <u>SENP2</u>    | 1 | 1 | 0 | 1 | 1 | 0 | 0 | 0 | 0 | 1 | 5 |
| <u>RNF2</u>     | 1 | 1 | 0 | 1 | 1 | 0 | 0 | 0 | 0 | 1 | 5 |
| <u>BCL7A</u>    | 1 | 1 | 0 | 1 | 1 | 1 | 0 | 0 | 0 | 0 | 5 |
| <u>CLIP1</u>    | 1 | 1 | 0 | 1 | 1 | 0 | 0 | 0 | 0 | 1 | 5 |
| <u>ATXN1</u>    | 1 | 0 | 0 | 1 | 1 | 1 | 0 | 0 | 0 | 1 | 5 |
| <u>PKNOX2</u>   | 1 | 1 | 0 | 1 | 1 | 0 | 0 | 0 | 0 | 1 | 5 |
| <u>XPO4</u>     | 1 | 1 | 0 | 1 | 1 | 0 | 0 | 0 | 0 | 1 | 5 |
| <u>S100BPB</u>  | 1 | 1 | 0 | 1 | 1 | 0 | 0 | 0 | 0 | 1 | 5 |
| <u>C1orf149</u> | 1 | 1 | 0 | 1 | 1 | 0 | 0 | 0 | 0 | 1 | 5 |
| <u>FNDC3B</u>   | 1 | 1 | 0 | 1 | 1 | 0 | 0 | 0 | 0 | 1 | 5 |
| <u>SLC2A3</u>   | 1 | 1 | 0 | 1 | 1 | 0 | 0 | 0 | 0 | 1 | 5 |
| <u>BMPR2</u>    | 1 | 1 | 0 | 1 | 1 | 0 | 0 | 0 | 0 | 1 | 5 |
| <u>TRAK2</u>    | 1 | 1 | 0 | 1 | 1 | 0 | 0 | 0 | 0 | 1 | 5 |
| <u>SOX5</u>     | 1 | 0 | 0 | 1 | 1 | 1 | 0 | 0 | 0 | 1 | 5 |
| <u>SOX5</u>     | 1 | 0 | 0 | 1 | 1 | 1 | 0 | 0 | 0 | 1 | 5 |
| <u>ZFP36L1</u>  | 0 | 1 | 0 | 1 | 1 | 1 | 0 | 0 | 0 | 1 | 5 |
| <u>STC1</u>     | 1 | 1 | 0 | 1 | 1 | 0 | 0 | 0 | 0 | 1 | 5 |
| <u>TGFBI</u>    | 1 | 1 | 0 | 1 | 1 | 0 | 0 | 0 | 0 | 1 | 5 |
| <u>TWIST1</u>   | 1 | 1 | 0 | 1 | 1 | 1 | 0 | 0 | 0 | 0 | 5 |
| <u>UBE2B</u>    | 1 | 1 | 0 | 1 | 1 | 0 | 0 | 0 | 0 | 1 | 5 |
| <u>UBP1</u>     | 1 | 0 | 0 | 1 | 1 | 1 | 0 | 0 | 0 | 1 | 5 |
| <u>ZIC1</u>     | 1 | 0 | 0 | 1 | 1 | 1 | 0 | 0 | 0 | 1 | 5 |
| <u>PCGF2</u>    | 1 | 1 | 0 | 1 | 1 | 0 | 0 | 0 | 0 | 1 | 5 |
| <u>CACNB2</u>   | 1 | 1 | 0 | 1 | 1 | 0 | 0 | 0 | 0 | 1 | 5 |
| <u>DERL1</u>    | 1 | 1 | 0 | 1 | 1 | 0 | 0 | 0 | 0 | 1 | 5 |
| <u>CDC73</u>    | 1 | 1 | 0 | 1 | 1 | 0 | 0 | 0 | 0 | 1 | 5 |
| <u>LIN28</u>    | 1 | 1 | 0 | 1 | 1 | 0 | 0 | 0 | 0 | 1 | 5 |
| <u>NR4A3</u>    | 1 | 0 | 0 | 1 | 1 | 1 | 0 | 0 | 0 | 1 | 5 |
| <u>NARG1</u>    | 1 | 1 | 0 | 1 | 1 | 0 | 0 | 0 | 0 | 1 | 5 |

|                 |   |   |   |   |   |   |   |   |   |   |   |
|-----------------|---|---|---|---|---|---|---|---|---|---|---|
| <u>RNF34</u>    | 1 | 1 | 0 | 1 | 1 | 0 | 0 | 0 | 0 | 1 | 5 |
| <u>C13orf23</u> | 1 | 1 | 0 | 1 | 1 | 0 | 0 | 0 | 0 | 1 | 5 |
| <u>CAMK2G</u>   | 1 | 0 | 0 | 1 | 1 | 1 | 0 | 0 | 0 | 1 | 5 |
| <u>CAMK2G</u>   | 1 | 0 | 0 | 1 | 1 | 1 | 0 | 0 | 0 | 1 | 5 |
| <u>CAMK2G</u>   | 1 | 0 | 0 | 1 | 1 | 1 | 0 | 0 | 0 | 1 | 5 |
| <u>SPRY4</u>    | 1 | 0 | 0 | 1 | 1 | 1 | 0 | 0 | 0 | 1 | 5 |
| <u>FZD4</u>     | 1 | 1 | 0 | 1 | 1 | 0 | 0 | 0 | 0 | 1 | 5 |
| <u>C11orf56</u> | 1 | 1 | 0 | 1 | 1 | 0 | 0 | 0 | 0 | 1 | 5 |
| <u>CASP10</u>   | 1 | 1 | 0 | 1 | 1 | 0 | 0 | 0 | 0 | 1 | 5 |
| <u>RECK</u>     | 1 | 1 | 0 | 1 | 1 | 0 | 0 | 0 | 0 | 1 | 5 |
| <u>CARD11</u>   | 1 | 1 | 0 | 1 | 1 | 0 | 0 | 0 | 0 | 1 | 5 |
| <u>OGT</u>      | 1 | 1 | 0 | 1 | 1 | 0 | 0 | 0 | 0 | 1 | 5 |
| <u>CDC42BPA</u> | 1 | 1 | 0 | 1 | 1 | 0 | 0 | 0 | 0 | 1 | 5 |
| <u>ADO</u>      | 1 | 1 | 0 | 1 | 1 | 0 | 0 | 0 | 0 | 1 | 5 |
| <u>FAM73B</u>   | 1 | 1 | 0 | 1 | 1 | 0 | 0 | 0 | 0 | 1 | 5 |
| <u>API5</u>     | 1 | 1 | 0 | 1 | 1 | 0 | 0 | 0 | 0 | 1 | 5 |
| <u>CGGBP1</u>   | 1 | 1 | 0 | 1 | 1 | 0 | 0 | 0 | 0 | 1 | 5 |
| <u>BHLHB2</u>   | 1 | 1 | 0 | 1 | 1 | 0 | 0 | 0 | 0 | 1 | 5 |
| <u>TNFSF11</u>  | 1 | 1 | 0 | 1 | 1 | 0 | 0 | 0 | 0 | 1 | 5 |
| <u>RUNX1</u>    | 1 | 0 | 0 | 1 | 1 | 1 | 0 | 0 | 0 | 1 | 5 |
| <u>CBFA2T3</u>  | 1 | 1 | 0 | 1 | 1 | 0 | 0 | 0 | 0 | 1 | 5 |
| <u>EED</u>      | 1 | 1 | 0 | 1 | 1 | 0 | 0 | 0 | 0 | 1 | 5 |
| <u>EED</u>      | 1 | 1 | 0 | 1 | 1 | 0 | 0 | 0 | 0 | 1 | 5 |
| <u>CCNK</u>     | 0 | 1 | 0 | 1 | 1 | 1 | 0 | 0 | 0 | 1 | 5 |
| <u>PER2</u>     | 1 | 1 | 0 | 1 | 1 | 0 | 0 | 0 | 0 | 1 | 5 |
| <u>DHX57</u>    | 1 | 1 | 0 | 1 | 1 | 0 | 0 | 0 | 0 | 1 | 5 |
| <u>LONRF1</u>   | 1 | 1 | 0 | 1 | 1 | 0 | 0 | 0 | 0 | 1 | 5 |
| <u>YTHDC1</u>   | 1 | 0 | 0 | 1 | 1 | 1 | 0 | 0 | 0 | 1 | 5 |
| <u>CD4</u>      | 1 | 1 | 0 | 1 | 1 | 0 | 0 | 0 | 0 | 1 | 5 |
| <u>C5orf13</u>  | 1 | 0 | 0 | 1 | 1 | 1 | 0 | 0 | 0 | 1 | 5 |
| <u>NRXN1</u>    | 1 | 0 | 0 | 1 | 1 | 1 | 0 | 0 | 0 | 1 | 5 |
| <u>AKAP7</u>    | 1 | 0 | 0 | 1 | 1 | 1 | 0 | 0 | 0 | 1 | 5 |
| <u>AKAP7</u>    | 1 | 0 | 0 | 1 | 1 | 1 | 0 | 0 | 0 | 1 | 5 |
| <u>AKAP6</u>    | 1 | 1 | 0 | 1 | 1 | 0 | 0 | 0 | 0 | 1 | 5 |
| <u>ATG5</u>     | 1 | 1 | 0 | 1 | 1 | 0 | 0 | 0 | 0 | 1 | 5 |
| <u>ADAMTS1</u>  | 1 | 1 | 0 | 1 | 1 | 0 | 0 | 0 | 0 | 1 | 5 |
| <u>CLOCK</u>    | 1 | 1 | 0 | 1 | 1 | 1 | 0 | 0 | 0 | 0 | 5 |
| <u>SEC24C</u>   | 1 | 0 | 0 | 1 | 1 | 1 | 0 | 0 | 0 | 1 | 5 |
| <u>PCDHA9</u>   | 0 | 1 | 0 | 1 | 1 | 1 | 0 | 0 | 0 | 1 | 5 |
| <u>KIAA0195</u> | 1 | 1 | 0 | 1 | 1 | 0 | 0 | 0 | 0 | 1 | 5 |
| <u>BCLAF1</u>   | 1 | 1 | 0 | 1 | 1 | 0 | 0 | 0 | 0 | 1 | 5 |

|                 |   |   |   |   |   |   |   |   |   |   |   |
|-----------------|---|---|---|---|---|---|---|---|---|---|---|
| <u>TSC22D2</u>  | 1 | 1 | 0 | 1 | 1 | 0 | 0 | 0 | 0 | 1 | 5 |
| <u>KIAA0528</u> | 1 | 1 | 0 | 1 | 1 | 0 | 0 | 0 | 0 | 1 | 5 |
| <u>G3BP2</u>    | 1 | 0 | 0 | 1 | 1 | 1 | 0 | 0 | 0 | 1 | 5 |
| <u>G3BP2</u>    | 1 | 0 | 0 | 1 | 1 | 1 | 0 | 0 | 0 | 1 | 5 |
| <u>NR1D2</u>    | 1 | 1 | 0 | 1 | 1 | 0 | 0 | 0 | 0 | 1 | 5 |
| <u>E2F7</u>     | 1 | 1 | 0 | 0 | 1 | 1 | 0 | 0 | 0 | 1 | 5 |
| <u>C3orf59</u>  | 1 | 1 | 0 | 0 | 1 | 1 | 0 | 0 | 0 | 1 | 5 |
| <u>DUSP5</u>    | 1 | 1 | 0 | 0 | 1 | 1 | 0 | 0 | 0 | 1 | 5 |
| <u>PLCL2</u>    | 1 | 1 | 0 | 0 | 1 | 1 | 0 | 0 | 0 | 1 | 5 |
| <u>TRIM2</u>    | 1 | 1 | 0 | 0 | 1 | 1 | 0 | 0 | 0 | 1 | 5 |
| <u>CLASP1</u>   | 1 | 1 | 0 | 0 | 1 | 1 | 0 | 0 | 0 | 1 | 5 |
| <u>FBXO33</u>   | 1 | 1 | 0 | 0 | 1 | 1 | 0 | 0 | 0 | 1 | 5 |
| <u>MAMDC2</u>   | 1 | 1 | 0 | 0 | 1 | 1 | 0 | 0 | 0 | 1 | 5 |
| <u>FAM126B</u>  | 1 | 1 | 0 | 0 | 1 | 1 | 0 | 0 | 0 | 1 | 5 |
| <u>INPP5A</u>   | 1 | 1 | 0 | 0 | 1 | 1 | 0 | 0 | 0 | 1 | 5 |
| <u>KPNB1</u>    | 1 | 1 | 0 | 0 | 1 | 1 | 0 | 0 | 0 | 1 | 5 |
| <u>PAM</u>      | 1 | 1 | 0 | 0 | 1 | 1 | 0 | 0 | 0 | 1 | 5 |
| <u>RAPH1</u>    | 1 | 1 | 0 | 0 | 1 | 1 | 0 | 0 | 0 | 1 | 5 |
| <u>ST8SIA4</u>  | 1 | 1 | 0 | 0 | 1 | 1 | 0 | 0 | 0 | 1 | 5 |
| <u>FBXO11</u>   | 1 | 1 | 0 | 0 | 1 | 1 | 0 | 0 | 0 | 1 | 5 |
| <u>KCNE3</u>    | 1 | 1 | 0 | 1 | 0 | 0 | 1 | 0 | 0 | 1 | 5 |
| <u>PDCD6IP</u>  | 1 | 0 | 1 | 1 | 0 | 0 | 1 | 0 | 0 | 1 | 5 |
| <u>SH2D3C</u>   | 1 | 1 | 0 | 1 | 1 | 0 | 1 | 0 | 0 | 0 | 5 |
| <u>ACTR2</u>    | 1 | 1 | 0 | 1 | 0 | 0 | 1 | 0 | 0 | 1 | 5 |
| <u>ABI2</u>     | 1 | 1 | 0 | 1 | 0 | 0 | 1 | 0 | 0 | 1 | 5 |
| <u>INADL</u>    | 1 | 1 | 0 | 1 | 0 | 0 | 1 | 0 | 0 | 1 | 5 |
| <u>CTDSPL</u>   | 1 | 0 | 0 | 1 | 1 | 1 | 0 | 0 | 0 | 1 | 5 |
| <u>EFS</u>      | 1 | 1 | 0 | 1 | 0 | 0 | 1 | 0 | 0 | 1 | 5 |
| <u>ADAR</u>     | 1 | 1 | 0 | 1 | 0 | 0 | 1 | 0 | 0 | 1 | 5 |
| <u>CDR2</u>     | 1 | 1 | 0 | 1 | 0 | 0 | 1 | 0 | 0 | 1 | 5 |
| <u>DLC1</u>     | 1 | 1 | 0 | 1 | 0 | 0 | 1 | 0 | 0 | 1 | 5 |
| <u>ATP8A1</u>   | 1 | 1 | 0 | 1 | 0 | 0 | 1 | 0 | 0 | 1 | 5 |
| <u>ADARB1</u>   | 1 | 0 | 1 | 1 | 0 | 0 | 1 | 0 | 0 | 1 | 5 |
| <u>ADARB1</u>   | 1 | 1 | 0 | 1 | 1 | 0 | 0 | 0 | 0 | 1 | 5 |
| <u>PGRMC2</u>   | 1 | 1 | 0 | 1 | 0 | 0 | 1 | 0 | 0 | 1 | 5 |
| <u>SEC24B</u>   | 1 | 1 | 0 | 1 | 0 | 0 | 1 | 0 | 1 | 0 | 5 |
| <u>MERTK</u>    | 1 | 1 | 0 | 1 | 0 | 0 | 1 | 0 | 0 | 1 | 5 |
| <u>CRTAP</u>    | 1 | 1 | 0 | 1 | 0 | 0 | 1 | 0 | 0 | 1 | 5 |
| <u>SEMA4F</u>   | 1 | 1 | 0 | 1 | 0 | 0 | 1 | 0 | 0 | 1 | 5 |
| <u>HYOU1</u>    | 1 | 0 | 0 | 1 | 0 | 0 | 1 | 0 | 1 | 1 | 5 |
| <u>ARPC1A</u>   | 0 | 1 | 1 | 1 | 0 | 0 | 1 | 0 | 0 | 1 | 5 |

|                  |   |   |   |   |   |   |   |   |   |   |   |
|------------------|---|---|---|---|---|---|---|---|---|---|---|
| <u>AGPAT1</u>    | 1 | 1 | 0 | 1 | 1 | 0 | 0 | 0 | 0 | 1 | 5 |
| <u>SPTLC1</u>    | 1 | 1 | 0 | 1 | 0 | 0 | 1 | 0 | 0 | 1 | 5 |
| <u>MAB21L2</u>   | 1 | 1 | 0 | 1 | 0 | 0 | 1 | 0 | 0 | 1 | 5 |
| <u>POLR3F</u>    | 1 | 1 | 0 | 1 | 0 | 0 | 1 | 0 | 0 | 1 | 5 |
| <u>CUGBP2</u>    | 1 | 1 | 0 | 1 | 0 | 0 | 1 | 0 | 0 | 1 | 5 |
| <u>RRAGA</u>     | 1 | 1 | 0 | 1 | 1 | 0 | 1 | 0 | 0 | 0 | 5 |
| <u>NFAT5</u>     | 1 | 1 | 0 | 1 | 1 | 0 | 0 | 0 | 0 | 1 | 5 |
| <u>CFL2</u>      | 1 | 1 | 0 | 1 | 0 | 0 | 1 | 0 | 0 | 1 | 5 |
| <u>TCFL5</u>     | 1 | 1 | 0 | 1 | 0 | 0 | 1 | 0 | 0 | 1 | 5 |
| <u>NUP50</u>     | 1 | 1 | 0 | 1 | 0 | 0 | 1 | 0 | 0 | 1 | 5 |
| <u>JARID1B</u>   | 1 | 1 | 0 | 1 | 0 | 0 | 1 | 0 | 0 | 1 | 5 |
| <u>HBS1L</u>     | 1 | 1 | 0 | 1 | 0 | 0 | 1 | 0 | 0 | 1 | 5 |
| <u>ZMYND11</u>   | 1 | 0 | 1 | 1 | 0 | 0 | 1 | 0 | 0 | 1 | 5 |
| <u>NPFFR2</u>    | 1 | 1 | 0 | 1 | 0 | 0 | 1 | 0 | 0 | 1 | 5 |
| <u>BLCAP</u>     | 1 | 1 | 0 | 1 | 0 | 0 | 1 | 0 | 0 | 1 | 5 |
| <u>EDAR</u>      | 1 | 1 | 0 | 1 | 0 | 0 | 1 | 0 | 0 | 1 | 5 |
| <u>PNRC1</u>     | 1 | 1 | 0 | 1 | 0 | 0 | 1 | 0 | 0 | 1 | 5 |
| <u>CKAP4</u>     | 1 | 1 | 0 | 1 | 0 | 0 | 1 | 0 | 0 | 1 | 5 |
| <u>TMED10</u>    | 1 | 1 | 0 | 1 | 0 | 0 | 1 | 0 | 0 | 1 | 5 |
| <u>UOCR</u>      | 1 | 1 | 0 | 1 | 0 | 0 | 1 | 1 | 0 | 0 | 5 |
| <u>TLK2</u>      | 1 | 1 | 0 | 1 | 0 | 0 | 1 | 0 | 0 | 1 | 5 |
| <u>KDEL2</u>     | 1 | 1 | 0 | 1 | 0 | 0 | 1 | 0 | 0 | 1 | 5 |
| <u>KDEL3</u>     | 1 | 1 | 0 | 1 | 0 | 0 | 1 | 0 | 0 | 1 | 5 |
| <u>RCBTB2</u>    | 1 | 1 | 0 | 1 | 0 | 0 | 1 | 0 | 0 | 1 | 5 |
| <u>POLS</u>      | 1 | 1 | 0 | 1 | 0 | 0 | 1 | 0 | 0 | 1 | 5 |
| <u>CPSF6</u>     | 0 | 1 | 1 | 1 | 0 | 0 | 1 | 0 | 0 | 1 | 5 |
| <u>TOPBP1</u>    | 1 | 1 | 0 | 1 | 0 | 0 | 1 | 0 | 0 | 1 | 5 |
| <u>TPPP</u>      | 1 | 1 | 0 | 1 | 0 | 0 | 1 | 0 | 0 | 1 | 5 |
| <u>ESM1</u>      | 0 | 1 | 0 | 1 | 1 | 1 | 0 | 0 | 0 | 1 | 5 |
| <u>ADAMTS8</u>   | 1 | 1 | 0 | 1 | 0 | 0 | 1 | 0 | 0 | 1 | 5 |
| <u>CIT</u>       | 1 | 1 | 0 | 1 | 0 | 0 | 1 | 0 | 0 | 1 | 5 |
| <u>PTPRT</u>     | 1 | 1 | 0 | 1 | 0 | 0 | 1 | 0 | 0 | 1 | 5 |
| <u>AP4S1</u>     | 1 | 1 | 0 | 1 | 1 | 0 | 1 | 0 | 0 | 0 | 5 |
| <u>ERLIN2</u>    | 1 | 1 | 0 | 1 | 0 | 0 | 1 | 0 | 0 | 1 | 5 |
| <u>NUDT4</u>     | 1 | 0 | 1 | 1 | 0 | 0 | 1 | 0 | 0 | 1 | 5 |
| <u>FSTL1</u>     | 1 | 1 | 0 | 1 | 0 | 0 | 1 | 0 | 0 | 1 | 5 |
| <u>CHKA</u>      | 1 | 1 | 0 | 1 | 0 | 0 | 1 | 0 | 0 | 1 | 5 |
| <u>POLI</u>      | 0 | 1 | 1 | 1 | 0 | 0 | 1 | 0 | 0 | 1 | 5 |
| <u>CHML</u>      | 1 | 1 | 0 | 1 | 0 | 0 | 1 | 0 | 0 | 1 | 5 |
| <u>HPS5</u>      | 1 | 1 | 0 | 1 | 0 | 0 | 1 | 0 | 0 | 1 | 5 |
| <u>C14orf126</u> | 1 | 1 | 0 | 1 | 0 | 0 | 1 | 0 | 0 | 1 | 5 |

|           |   |   |   |   |   |   |   |   |   |   |   |
|-----------|---|---|---|---|---|---|---|---|---|---|---|
| CHP       | 1 | 1 | 0 | 1 | 0 | 0 | 1 | 0 | 0 | 1 | 5 |
| KLF12     | 1 | 1 | 0 | 1 | 0 | 0 | 1 | 0 | 0 | 1 | 5 |
| BTBD14B   | 1 | 1 | 0 | 1 | 0 | 0 | 1 | 0 | 0 | 1 | 5 |
| ADCY7     | 1 | 1 | 0 | 1 | 0 | 0 | 1 | 0 | 0 | 1 | 5 |
| LYPLA2    | 1 | 1 | 0 | 1 | 0 | 0 | 1 | 0 | 0 | 1 | 5 |
| MGAT4A    | 1 | 1 | 0 | 1 | 0 | 0 | 1 | 0 | 0 | 1 | 5 |
| SLC46A1   | 1 | 1 | 0 | 1 | 0 | 0 | 1 | 0 | 0 | 1 | 5 |
| LARP4     | 1 | 0 | 1 | 1 | 0 | 0 | 1 | 0 | 0 | 1 | 5 |
| SFT2D1    | 1 | 1 | 0 | 1 | 0 | 0 | 1 | 0 | 0 | 1 | 5 |
| TRIM9     | 1 | 1 | 0 | 1 | 0 | 0 | 1 | 0 | 0 | 1 | 5 |
| TRIM9     | 1 | 1 | 0 | 1 | 1 | 0 | 0 | 0 | 0 | 1 | 5 |
| CHRNA2    | 1 | 1 | 0 | 1 | 0 | 0 | 1 | 0 | 0 | 1 | 5 |
| MAL2      | 1 | 1 | 0 | 1 | 0 | 0 | 1 | 0 | 0 | 1 | 5 |
| GPRIN1    | 1 | 1 | 0 | 1 | 0 | 0 | 1 | 0 | 0 | 1 | 5 |
| SLC25A25  | 1 | 0 | 0 | 1 | 1 | 1 | 0 | 0 | 0 | 1 | 5 |
| TMEM132B  | 1 | 1 | 0 | 1 | 0 | 0 | 1 | 0 | 0 | 1 | 5 |
| CCDC85A   | 1 | 1 | 0 | 1 | 0 | 0 | 1 | 0 | 0 | 1 | 5 |
| SORCS1    | 1 | 1 | 0 | 1 | 0 | 0 | 1 | 0 | 0 | 1 | 5 |
| TMEM123   | 1 | 1 | 0 | 1 | 0 | 0 | 1 | 0 | 0 | 1 | 5 |
| SLC26A9   | 1 | 1 | 0 | 1 | 0 | 0 | 1 | 0 | 0 | 1 | 5 |
| SLC26A7   | 1 | 1 | 0 | 1 | 0 | 0 | 1 | 0 | 0 | 1 | 5 |
| KCTD12    | 1 | 1 | 0 | 1 | 0 | 0 | 1 | 0 | 0 | 1 | 5 |
| ARL11     | 1 | 1 | 0 | 1 | 0 | 0 | 1 | 0 | 0 | 1 | 5 |
| C16orf75  | 1 | 1 | 0 | 1 | 0 | 0 | 1 | 0 | 0 | 1 | 5 |
| LYSMD3    | 1 | 1 | 0 | 1 | 0 | 0 | 1 | 0 | 0 | 1 | 5 |
| LOC116236 | 1 | 1 | 0 | 1 | 0 | 0 | 1 | 0 | 0 | 1 | 5 |
| RAB39B    | 1 | 1 | 0 | 1 | 0 | 0 | 1 | 0 | 0 | 1 | 5 |
| C6orf192  | 1 | 1 | 0 | 1 | 0 | 0 | 1 | 0 | 0 | 1 | 5 |
| CENTD1    | 1 | 1 | 0 | 1 | 0 | 0 | 1 | 0 | 0 | 1 | 5 |
| SH2D1B    | 1 | 1 | 0 | 1 | 0 | 0 | 1 | 0 | 0 | 1 | 5 |
| RAB3IP    | 1 | 0 | 1 | 1 | 0 | 0 | 1 | 0 | 0 | 1 | 5 |
| CLCN6     | 1 | 1 | 0 | 1 | 0 | 0 | 1 | 0 | 0 | 1 | 5 |
| C10orf4   | 1 | 1 | 0 | 1 | 0 | 0 | 1 | 0 | 0 | 1 | 5 |
| C10orf78  | 1 | 1 | 0 | 1 | 1 | 0 | 0 | 0 | 0 | 1 | 5 |
| C10orf78  | 1 | 0 | 0 | 1 | 1 | 0 | 1 | 0 | 0 | 1 | 5 |
| LRRK2     | 1 | 1 | 0 | 1 | 0 | 0 | 1 | 0 | 0 | 1 | 5 |
| IKIP      | 1 | 1 | 0 | 1 | 0 | 0 | 1 | 0 | 0 | 1 | 5 |
| BTBD11    | 1 | 1 | 0 | 1 | 0 | 0 | 1 | 0 | 0 | 1 | 5 |
| SLAIN1    | 1 | 1 | 0 | 1 | 0 | 0 | 1 | 0 | 1 | 0 | 5 |
| TRAPPC6B  | 1 | 1 | 0 | 1 | 0 | 0 | 1 | 0 | 0 | 1 | 5 |
| SOCS4     | 1 | 0 | 1 | 1 | 0 | 0 | 1 | 0 | 0 | 1 | 5 |

|           |   |   |   |   |   |   |   |   |   |   |   |
|-----------|---|---|---|---|---|---|---|---|---|---|---|
| JUNDM2    | 1 | 0 | 0 | 1 | 1 | 0 | 1 | 0 | 0 | 1 | 5 |
| SLC24A4   | 1 | 1 | 0 | 1 | 0 | 0 | 1 | 0 | 0 | 1 | 5 |
| MSI2      | 1 | 1 | 0 | 1 | 0 | 0 | 1 | 0 | 0 | 1 | 5 |
| CD300LB   | 1 | 1 | 0 | 1 | 0 | 0 | 1 | 0 | 0 | 1 | 5 |
| ZNF792    | 1 | 1 | 0 | 1 | 0 | 0 | 1 | 0 | 0 | 1 | 5 |
| ANKLE1    | 1 | 1 | 0 | 1 | 0 | 0 | 1 | 0 | 0 | 1 | 5 |
| ADH4      | 1 | 1 | 0 | 1 | 0 | 0 | 1 | 0 | 0 | 1 | 5 |
| C1orf93   | 1 | 1 | 0 | 1 | 0 | 0 | 1 | 0 | 0 | 1 | 5 |
| C1orf83   | 1 | 1 | 0 | 1 | 0 | 0 | 1 | 0 | 0 | 1 | 5 |
| UBXD3     | 1 | 1 | 0 | 1 | 0 | 0 | 1 | 0 | 0 | 1 | 5 |
| C1orf131  | 1 | 1 | 0 | 1 | 0 | 0 | 1 | 0 | 0 | 1 | 5 |
| KLF17     | 1 | 1 | 0 | 1 | 0 | 0 | 1 | 0 | 0 | 1 | 5 |
| COL5A1    | 1 | 1 | 0 | 1 | 0 | 0 | 1 | 0 | 0 | 1 | 5 |
| C22orf25  | 1 | 1 | 0 | 1 | 0 | 0 | 1 | 0 | 0 | 1 | 5 |
| COL6A3    | 1 | 1 | 0 | 1 | 0 | 0 | 1 | 0 | 0 | 1 | 5 |
| C2orf60   | 1 | 1 | 0 | 1 | 0 | 0 | 1 | 0 | 0 | 1 | 5 |
| CMPK2     | 1 | 1 | 0 | 1 | 0 | 0 | 1 | 0 | 0 | 1 | 5 |
| TMEM18    | 1 | 1 | 0 | 1 | 0 | 0 | 1 | 0 | 0 | 1 | 5 |
| FLJ40298  | 1 | 1 | 0 | 1 | 0 | 0 | 1 | 0 | 0 | 1 | 5 |
| ACMSD     | 1 | 1 | 0 | 1 | 0 | 0 | 1 | 0 | 0 | 1 | 5 |
| RFTN2     | 1 | 1 | 0 | 1 | 0 | 0 | 1 | 0 | 0 | 1 | 5 |
| ACVR1C    | 1 | 1 | 0 | 1 | 0 | 0 | 1 | 0 | 0 | 1 | 5 |
| UBR3      | 1 | 1 | 0 | 1 | 1 | 0 | 1 | 0 | 0 | 0 | 5 |
| CPNE4     | 1 | 1 | 0 | 1 | 0 | 0 | 1 | 0 | 0 | 1 | 5 |
| FAM43A    | 1 | 1 | 0 | 1 | 0 | 0 | 1 | 0 | 0 | 1 | 5 |
| SLC31A1   | 1 | 1 | 0 | 1 | 1 | 0 | 1 | 0 | 0 | 0 | 5 |
| LIN54     | 1 | 1 | 0 | 1 | 0 | 0 | 1 | 1 | 0 | 0 | 5 |
| SPATA18   | 1 | 1 | 0 | 1 | 0 | 0 | 1 | 0 | 0 | 1 | 5 |
| CPEB2     | 1 | 0 | 0 | 1 | 1 | 1 | 0 | 0 | 0 | 1 | 5 |
| C5orf33   | 1 | 1 | 0 | 1 | 0 | 0 | 1 | 0 | 0 | 1 | 5 |
| NCOA7     | 1 | 1 | 0 | 1 | 0 | 0 | 1 | 0 | 0 | 1 | 5 |
| HINT3     | 1 | 1 | 0 | 1 | 0 | 0 | 1 | 0 | 0 | 1 | 5 |
| CD109     | 1 | 1 | 0 | 1 | 0 | 0 | 1 | 0 | 0 | 1 | 5 |
| COX11     | 1 | 1 | 0 | 1 | 0 | 0 | 1 | 0 | 0 | 1 | 5 |
| C7orf57   | 1 | 1 | 0 | 1 | 0 | 0 | 1 | 0 | 0 | 1 | 5 |
| TMEM71    | 1 | 1 | 0 | 1 | 0 | 0 | 1 | 0 | 0 | 1 | 5 |
| LOC137886 | 1 | 1 | 0 | 1 | 0 | 0 | 1 | 0 | 0 | 1 | 5 |
| CREB1     | 1 | 0 | 0 | 1 | 1 | 1 | 0 | 0 | 0 | 1 | 5 |
| CREBL2    | 1 | 1 | 0 | 1 | 0 | 0 | 1 | 0 | 0 | 1 | 5 |
| WDR40B    | 1 | 1 | 0 | 1 | 0 | 0 | 1 | 0 | 0 | 1 | 5 |
| CRH       | 1 | 1 | 0 | 1 | 0 | 0 | 1 | 0 | 0 | 1 | 5 |



|                 |   |   |   |   |   |   |   |   |   |   |   |
|-----------------|---|---|---|---|---|---|---|---|---|---|---|
| <u>FAM123B</u>  | 1 | 1 | 0 | 1 | 0 | 0 | 1 | 0 | 0 | 1 | 5 |
| <u>CRKL</u>     | 1 | 1 | 0 | 1 | 0 | 0 | 1 | 0 | 0 | 1 | 5 |
| <u>ASB5</u>     | 1 | 1 | 0 | 1 | 0 | 0 | 1 | 0 | 0 | 1 | 5 |
| <u>CRY2</u>     | 1 | 1 | 0 | 1 | 0 | 0 | 1 | 0 | 0 | 1 | 5 |
| <u>ZNF280B</u>  | 1 | 1 | 0 | 1 | 0 | 0 | 1 | 0 | 0 | 1 | 5 |
| <u>ADPRH</u>    | 1 | 1 | 0 | 1 | 0 | 0 | 1 | 0 | 0 | 1 | 5 |
| <u>C10orf46</u> | 1 | 1 | 0 | 1 | 0 | 0 | 1 | 0 | 0 | 1 | 5 |
| <u>FAM76B</u>   | 1 | 1 | 0 | 1 | 0 | 0 | 1 | 0 | 0 | 1 | 5 |
| <u>SPTY2D1</u>  | 1 | 1 | 0 | 1 | 0 | 0 | 1 | 0 | 0 | 1 | 5 |
| <u>TMEM86A</u>  | 1 | 1 | 0 | 1 | 0 | 0 | 1 | 0 | 0 | 1 | 5 |
| <u>FLJ32549</u> | 1 | 1 | 0 | 1 | 0 | 0 | 1 | 0 | 0 | 1 | 5 |
| <u>C13orf30</u> | 1 | 1 | 0 | 1 | 0 | 0 | 1 | 0 | 0 | 1 | 5 |
| <u>PRIMA1</u>   | 1 | 1 | 0 | 1 | 0 | 0 | 1 | 0 | 0 | 1 | 5 |
| <u>CMTM4</u>    | 1 | 1 | 0 | 1 | 0 | 0 | 1 | 0 | 0 | 1 | 5 |
| <u>GSG1L</u>    | 1 | 1 | 0 | 1 | 0 | 0 | 1 | 0 | 0 | 1 | 5 |
| <u>SLFN13</u>   | 1 | 1 | 0 | 1 | 0 | 0 | 1 | 0 | 0 | 1 | 5 |
| <u>AMAC1</u>    | 1 | 1 | 0 | 1 | 0 | 0 | 1 | 0 | 0 | 1 | 5 |
| <u>C18orf25</u> | 1 | 1 | 0 | 1 | 0 | 0 | 1 | 0 | 0 | 1 | 5 |
| <u>ZNF418</u>   | 1 | 1 | 0 | 1 | 0 | 0 | 1 | 0 | 0 | 1 | 5 |
| <u>ZNF417</u>   | 1 | 1 | 0 | 1 | 0 | 0 | 1 | 0 | 0 | 1 | 5 |
| <u>ZNF420</u>   | 1 | 1 | 0 | 1 | 0 | 0 | 1 | 0 | 0 | 1 | 5 |
| <u>C19orf25</u> | 1 | 1 | 0 | 1 | 0 | 0 | 1 | 0 | 0 | 1 | 5 |
| <u>ZNF569</u>   | 1 | 1 | 0 | 1 | 0 | 0 | 1 | 0 | 0 | 1 | 5 |
| <u>C1orf52</u>  | 1 | 1 | 0 | 1 | 0 | 0 | 1 | 0 | 0 | 1 | 5 |
| <u>EXOC8</u>    | 1 | 1 | 0 | 1 | 0 | 0 | 1 | 0 | 0 | 1 | 5 |
| <u>PDIK1L</u>   | 1 | 1 | 0 | 1 | 0 | 0 | 1 | 0 | 0 | 1 | 5 |
| <u>BNIPL</u>    | 1 | 1 | 0 | 1 | 0 | 0 | 1 | 0 | 0 | 1 | 5 |
| <u>C1orf84</u>  | 0 | 1 | 1 | 1 | 0 | 0 | 1 | 0 | 0 | 1 | 5 |
| <u>CTNND1</u>   | 1 | 1 | 0 | 1 | 0 | 0 | 1 | 0 | 0 | 1 | 5 |
| <u>PROM2</u>    | 1 | 1 | 0 | 1 | 0 | 0 | 1 | 0 | 0 | 1 | 5 |
| <u>ZNF385B</u>  | 1 | 1 | 0 | 1 | 1 | 0 | 1 | 0 | 0 | 0 | 5 |
| <u>FAM84A</u>   | 1 | 1 | 0 | 1 | 0 | 0 | 1 | 0 | 0 | 1 | 5 |
| <u>CTSO</u>     | 1 | 1 | 0 | 1 | 0 | 0 | 1 | 0 | 0 | 1 | 5 |
| <u>RNF38</u>    | 1 | 0 | 0 | 1 | 0 | 0 | 1 | 1 | 0 | 1 | 5 |
| <u>IGSF11</u>   | 1 | 0 | 1 | 1 | 0 | 0 | 1 | 0 | 0 | 1 | 5 |
| <u>SRFBP1</u>   | 1 | 1 | 0 | 1 | 0 | 0 | 1 | 0 | 0 | 1 | 5 |
| <u>PLEKHG4B</u> | 1 | 1 | 0 | 1 | 0 | 0 | 1 | 0 | 0 | 1 | 5 |
| <u>C6orf151</u> | 1 | 1 | 0 | 1 | 0 | 0 | 1 | 0 | 0 | 1 | 5 |
| <u>MBOAT1</u>   | 1 | 1 | 0 | 1 | 0 | 0 | 1 | 0 | 0 | 1 | 5 |
| <u>ABCA13</u>   | 1 | 1 | 0 | 1 | 0 | 0 | 1 | 0 | 0 | 1 | 5 |
| <u>CYP2C8</u>   | 1 | 1 | 0 | 1 | 0 | 0 | 1 | 0 | 0 | 1 | 5 |

|                  |   |   |   |   |   |   |   |   |   |   |   |
|------------------|---|---|---|---|---|---|---|---|---|---|---|
| <u>ADRBK2</u>    | 1 | 1 | 0 | 1 | 0 | 0 | 1 | 0 | 0 | 1 | 5 |
| <u>VPS13B</u>    | 1 | 0 | 0 | 1 | 0 | 0 | 1 | 1 | 0 | 1 | 5 |
| <u>CYP7A1</u>    | 1 | 1 | 0 | 1 | 0 | 0 | 1 | 0 | 0 | 1 | 5 |
| <u>FAM120AOS</u> | 1 | 1 | 0 | 1 | 0 | 0 | 1 | 0 | 0 | 1 | 5 |
| <u>CYP11B1</u>   | 1 | 1 | 0 | 1 | 0 | 0 | 1 | 0 | 0 | 1 | 5 |
| <u>FAM122B</u>   | 1 | 1 | 0 | 1 | 0 | 0 | 1 | 0 | 0 | 1 | 5 |
| <u>TMTC2</u>     | 1 | 1 | 0 | 1 | 0 | 0 | 1 | 0 | 0 | 1 | 5 |
| <u>MGC24039</u>  | 1 | 1 | 0 | 1 | 0 | 0 | 1 | 0 | 0 | 1 | 5 |
| <u>CCDC60</u>    | 1 | 1 | 0 | 1 | 0 | 0 | 1 | 0 | 0 | 1 | 5 |
| <u>GPR180</u>    | 1 | 1 | 0 | 1 | 0 | 0 | 1 | 0 | 0 | 1 | 5 |
| <u>STOML3</u>    | 1 | 1 | 0 | 1 | 0 | 0 | 1 | 0 | 0 | 1 | 5 |
| <u>C1orf26</u>   | 1 | 1 | 0 | 1 | 0 | 0 | 1 | 0 | 0 | 1 | 5 |
| <u>TMEM92</u>    | 1 | 1 | 0 | 1 | 0 | 0 | 1 | 0 | 0 | 1 | 5 |
| <u>RHBDL3</u>    | 1 | 1 | 0 | 1 | 0 | 0 | 1 | 0 | 0 | 1 | 5 |
| <u>DBT</u>       | 1 | 1 | 0 | 1 | 0 | 0 | 1 | 0 | 0 | 1 | 5 |
| <u>ZNF540</u>    | 1 | 1 | 0 | 1 | 0 | 0 | 1 | 0 | 0 | 1 | 5 |
| <u>GBP6</u>      | 1 | 1 | 0 | 1 | 0 | 0 | 1 | 0 | 0 | 1 | 5 |
| <u>PAP2D</u>     | 1 | 1 | 0 | 1 | 0 | 0 | 1 | 0 | 0 | 1 | 5 |
| <u>C1orf71</u>   | 1 | 1 | 0 | 1 | 0 | 0 | 1 | 0 | 0 | 1 | 5 |
| <u>AP1G1</u>     | 1 | 0 | 1 | 1 | 0 | 0 | 1 | 0 | 0 | 1 | 5 |
| <u>AP1G1</u>     | 1 | 1 | 0 | 1 | 1 | 0 | 0 | 0 | 0 | 1 | 5 |
| <u>DCX</u>       | 1 | 1 | 0 | 1 | 0 | 0 | 1 | 0 | 0 | 1 | 5 |
| <u>PRICKLE2</u>  | 1 | 1 | 0 | 1 | 0 | 0 | 1 | 0 | 0 | 1 | 5 |
| <u>SLC30A8</u>   | 1 | 1 | 0 | 1 | 0 | 0 | 1 | 0 | 0 | 1 | 5 |
| <u>INDOL1</u>    | 1 | 1 | 0 | 1 | 0 | 0 | 1 | 0 | 0 | 1 | 5 |
| <u>QSOX2</u>     | 1 | 1 | 0 | 1 | 0 | 0 | 1 | 0 | 0 | 1 | 5 |
| <u>GLIS3</u>     | 1 | 1 | 0 | 1 | 0 | 0 | 1 | 0 | 0 | 1 | 5 |
| <u>FAM46D</u>    | 1 | 1 | 0 | 1 | 0 | 0 | 1 | 0 | 0 | 1 | 5 |
| <u>FAM47B</u>    | 1 | 1 | 0 | 1 | 0 | 0 | 1 | 0 | 0 | 1 | 5 |
| <u>COMMD6</u>    | 1 | 1 | 0 | 1 | 0 | 0 | 1 | 0 | 0 | 1 | 5 |
| <u>KCNG3</u>     | 1 | 1 | 0 | 1 | 0 | 0 | 1 | 0 | 0 | 1 | 5 |
| <u>DIAPH1</u>    | 1 | 1 | 0 | 1 | 0 | 0 | 1 | 0 | 0 | 1 | 5 |
| <u>DKC1</u>      | 1 | 1 | 0 | 1 | 0 | 0 | 1 | 0 | 0 | 1 | 5 |
| <u>DNAH8</u>     | 0 | 1 | 1 | 1 | 0 | 0 | 1 | 0 | 0 | 1 | 5 |
| <u>DR1</u>       | 1 | 1 | 0 | 1 | 0 | 0 | 1 | 0 | 0 | 1 | 5 |
| <u>DSC1</u>      | 1 | 1 | 0 | 1 | 0 | 0 | 1 | 0 | 0 | 1 | 5 |
| <u>AGT</u>       | 1 | 1 | 0 | 1 | 0 | 0 | 1 | 0 | 0 | 1 | 5 |
| <u>DTNA</u>      | 1 | 1 | 0 | 1 | 1 | 0 | 0 | 0 | 0 | 1 | 5 |
| <u>DUSP3</u>     | 1 | 1 | 0 | 1 | 0 | 0 | 1 | 0 | 0 | 1 | 5 |
| <u>TOR1A</u>     | 1 | 1 | 0 | 1 | 0 | 0 | 1 | 0 | 0 | 1 | 5 |
| <u>E2F1</u>      | 1 | 1 | 0 | 1 | 0 | 0 | 1 | 0 | 0 | 1 | 5 |

|                  |   |   |   |   |   |   |   |   |   |   |   |
|------------------|---|---|---|---|---|---|---|---|---|---|---|
| <u>ABCA1</u>     | 1 | 1 | 0 | 1 | 0 | 0 | 1 | 0 | 0 | 1 | 5 |
| <u>EDNRA</u>     | 1 | 1 | 0 | 1 | 0 | 0 | 1 | 0 | 0 | 1 | 5 |
| <u>EIF2C4</u>    | 1 | 1 | 0 | 1 | 0 | 0 | 1 | 0 | 0 | 1 | 5 |
| <u>EGR1</u>      | 1 | 1 | 0 | 1 | 0 | 0 | 1 | 0 | 0 | 1 | 5 |
| <u>P76</u>       | 1 | 1 | 0 | 1 | 0 | 0 | 1 | 0 | 0 | 1 | 5 |
| <u>FAM71C</u>    | 1 | 1 | 0 | 1 | 0 | 0 | 1 | 0 | 0 | 1 | 5 |
| <u>ARID2</u>     | 1 | 1 | 0 | 1 | 0 | 0 | 1 | 0 | 0 | 1 | 5 |
| <u>EIF2S3</u>    | 1 | 1 | 0 | 1 | 0 | 0 | 1 | 0 | 0 | 1 | 5 |
| <u>ELAVL3</u>    | 1 | 1 | 0 | 1 | 0 | 0 | 1 | 0 | 0 | 1 | 5 |
| <u>SLC5A9</u>    | 1 | 1 | 0 | 1 | 0 | 0 | 1 | 0 | 0 | 1 | 5 |
| <u>TXLNA</u>     | 1 | 1 | 0 | 1 | 0 | 0 | 1 | 0 | 0 | 1 | 5 |
| <u>C2orf13</u>   | 1 | 1 | 0 | 1 | 0 | 0 | 1 | 0 | 0 | 1 | 5 |
| <u>PRR6</u>      | 1 | 1 | 0 | 1 | 0 | 0 | 1 | 0 | 0 | 1 | 5 |
| <u>CCDC125</u>   | 1 | 1 | 0 | 1 | 0 | 0 | 1 | 0 | 0 | 1 | 5 |
| <u>C9orf91</u>   | 1 | 1 | 0 | 1 | 0 | 0 | 1 | 0 | 0 | 1 | 5 |
| <u>C9orf25</u>   | 1 | 1 | 0 | 1 | 0 | 0 | 1 | 0 | 0 | 1 | 5 |
| <u>ZNF449</u>    | 1 | 1 | 0 | 1 | 0 | 0 | 1 | 0 | 0 | 1 | 5 |
| <u>LOC203547</u> | 1 | 1 | 0 | 1 | 0 | 0 | 1 | 0 | 0 | 1 | 5 |
| <u>EPHA3</u>     | 1 | 1 | 0 | 1 | 0 | 0 | 1 | 0 | 0 | 1 | 5 |
| <u>EPHA7</u>     | 1 | 1 | 0 | 1 | 0 | 0 | 1 | 0 | 0 | 1 | 5 |
| <u>EPHB1</u>     | 1 | 1 | 0 | 1 | 0 | 0 | 1 | 0 | 0 | 1 | 5 |
| <u>HIPK1</u>     | 1 | 1 | 0 | 1 | 0 | 0 | 1 | 0 | 0 | 1 | 5 |
| <u>STX2</u>      | 1 | 1 | 0 | 1 | 0 | 0 | 1 | 0 | 0 | 1 | 5 |
| <u>C3orf58</u>   | 1 | 1 | 0 | 1 | 0 | 0 | 1 | 0 | 0 | 1 | 5 |
| <u>EPS15</u>     | 1 | 1 | 0 | 1 | 0 | 0 | 1 | 0 | 0 | 1 | 5 |
| <u>SLC36A1</u>   | 1 | 1 | 0 | 1 | 0 | 0 | 1 | 0 | 0 | 1 | 5 |
| <u>ERBB4</u>     | 1 | 1 | 0 | 1 | 0 | 0 | 1 | 0 | 0 | 1 | 5 |
| <u>EYA4</u>      | 1 | 0 | 0 | 1 | 1 | 0 | 1 | 0 | 0 | 1 | 5 |
| <u>EYA4</u>      | 1 | 1 | 0 | 1 | 1 | 0 | 0 | 0 | 0 | 1 | 5 |
| <u>AKT2</u>      | 1 | 1 | 0 | 1 | 0 | 0 | 1 | 0 | 0 | 1 | 5 |
| <u>ESR1</u>      | 1 | 0 | 0 | 1 | 1 | 1 | 0 | 0 | 0 | 1 | 5 |
| <u>ETS1</u>      | 1 | 0 | 0 | 1 | 1 | 0 | 1 | 0 | 0 | 1 | 5 |
| <u>EYA1</u>      | 1 | 0 | 0 | 1 | 1 | 1 | 0 | 0 | 0 | 1 | 5 |
| <u>EYA1</u>      | 1 | 0 | 0 | 1 | 1 | 1 | 0 | 0 | 0 | 1 | 5 |
| <u>BPTF</u>      | 1 | 0 | 0 | 1 | 1 | 1 | 0 | 0 | 0 | 1 | 5 |
| <u>C10orf56</u>  | 1 | 1 | 0 | 1 | 0 | 0 | 1 | 0 | 0 | 1 | 5 |
| <u>RTKN2</u>     | 1 | 1 | 0 | 1 | 0 | 0 | 1 | 0 | 0 | 1 | 5 |
| <u>HNRPA3</u>    | 1 | 1 | 0 | 1 | 0 | 0 | 1 | 0 | 0 | 1 | 5 |
| <u>FAM26D</u>    | 1 | 1 | 0 | 1 | 0 | 0 | 1 | 0 | 0 | 1 | 5 |
| <u>C6orf170</u>  | 1 | 1 | 0 | 1 | 0 | 0 | 1 | 0 | 0 | 1 | 5 |
| <u>OPN5</u>      | 1 | 1 | 0 | 1 | 0 | 0 | 1 | 0 | 0 | 1 | 5 |

|                 |   |   |   |   |   |   |   |   |   |   |   |
|-----------------|---|---|---|---|---|---|---|---|---|---|---|
| <u>GPR116</u>   | 1 | 1 | 0 | 1 | 0 | 0 | 1 | 0 | 0 | 1 | 5 |
| <u>C6orf223</u> | 1 | 1 | 0 | 1 | 0 | 0 | 1 | 0 | 0 | 1 | 5 |
| <u>C6orf128</u> | 1 | 1 | 0 | 1 | 0 | 0 | 1 | 0 | 0 | 1 | 5 |
| <u>FDFT1</u>    | 1 | 1 | 0 | 1 | 0 | 0 | 1 | 0 | 0 | 1 | 5 |
| <u>LNX2</u>     | 1 | 1 | 0 | 1 | 0 | 0 | 1 | 0 | 0 | 1 | 5 |
| <u>SLC35F1</u>  | 1 | 1 | 0 | 1 | 0 | 0 | 1 | 0 | 0 | 1 | 5 |
| <u>FDX1</u>     | 1 | 1 | 0 | 1 | 0 | 0 | 1 | 0 | 0 | 1 | 5 |
| <u>SEMA3D</u>   | 1 | 1 | 0 | 1 | 0 | 0 | 1 | 0 | 0 | 1 | 5 |
| <u>FGF7</u>     | 1 | 1 | 0 | 1 | 0 | 0 | 1 | 0 | 0 | 1 | 5 |
| <u>FGFR1</u>    | 1 | 1 | 0 | 1 | 0 | 0 | 1 | 0 | 0 | 1 | 5 |
| <u>NLGN4Y</u>   | 1 | 1 | 0 | 1 | 0 | 0 | 1 | 0 | 0 | 1 | 5 |
| <u>ZFP30</u>    | 1 | 1 | 0 | 1 | 0 | 0 | 1 | 0 | 0 | 1 | 5 |
| <u>VASH1</u>    | 1 | 1 | 0 | 1 | 0 | 0 | 1 | 0 | 0 | 1 | 5 |
| <u>AAK1</u>     | 0 | 1 | 1 | 1 | 0 | 0 | 1 | 0 | 0 | 1 | 5 |
| <u>FNDC3A</u>   | 1 | 1 | 0 | 1 | 0 | 0 | 1 | 0 | 0 | 1 | 5 |
| <u>MON1B</u>    | 1 | 1 | 0 | 1 | 0 | 0 | 1 | 0 | 0 | 1 | 5 |
| <u>FKBP4</u>    | 1 | 1 | 0 | 1 | 1 | 0 | 1 | 0 | 0 | 0 | 5 |
| <u>DIS3</u>     | 1 | 1 | 0 | 1 | 0 | 0 | 1 | 0 | 0 | 1 | 5 |
| <u>ARHGEF15</u> | 1 | 1 | 0 | 1 | 0 | 0 | 1 | 0 | 0 | 1 | 5 |
| <u>EPN2</u>     | 1 | 1 | 0 | 1 | 0 | 0 | 1 | 0 | 0 | 1 | 5 |
| <u>TRAK1</u>    | 0 | 1 | 1 | 1 | 0 | 0 | 1 | 0 | 0 | 1 | 5 |
| <u>NCBP2</u>    | 1 | 1 | 0 | 1 | 0 | 0 | 1 | 0 | 0 | 1 | 5 |
| <u>MAPRE1</u>   | 1 | 1 | 0 | 1 | 0 | 0 | 1 | 0 | 1 | 0 | 5 |
| <u>TPX2</u>     | 1 | 1 | 0 | 1 | 0 | 0 | 1 | 0 | 0 | 1 | 5 |
| <u>DIP2C</u>    | 1 | 1 | 0 | 1 | 0 | 0 | 1 | 0 | 0 | 1 | 5 |
| <u>SORCS3</u>   | 1 | 1 | 0 | 1 | 0 | 0 | 1 | 0 | 0 | 1 | 5 |
| <u>KIAA0265</u> | 1 | 1 | 0 | 1 | 1 | 0 | 1 | 0 | 0 | 0 | 5 |
| <u>FBXO21</u>   | 1 | 1 | 0 | 1 | 0 | 0 | 1 | 0 | 0 | 1 | 5 |
| <u>CNOT1</u>    | 1 | 1 | 0 | 1 | 0 | 0 | 1 | 0 | 0 | 1 | 5 |
| <u>TMCC1</u>    | 1 | 1 | 0 | 1 | 0 | 0 | 1 | 0 | 0 | 1 | 5 |
| <u>PDZRN3</u>   | 1 | 1 | 0 | 1 | 0 | 0 | 1 | 0 | 0 | 1 | 5 |
| <u>XPO7</u>     | 0 | 1 | 1 | 1 | 0 | 0 | 1 | 0 | 0 | 1 | 5 |
| <u>MON2</u>     | 1 | 1 | 0 | 1 | 0 | 0 | 1 | 0 | 0 | 1 | 5 |
| <u>PDXDC1</u>   | 1 | 1 | 0 | 1 | 0 | 0 | 1 | 0 | 0 | 1 | 5 |
| <u>PDS5B</u>    | 1 | 1 | 0 | 1 | 1 | 0 | 1 | 0 | 0 | 0 | 5 |
| <u>NMNAT2</u>   | 1 | 1 | 0 | 1 | 0 | 0 | 1 | 0 | 0 | 1 | 5 |
| <u>GGA2</u>     | 1 | 1 | 0 | 1 | 0 | 0 | 1 | 0 | 0 | 1 | 5 |
| <u>SETX</u>     | 1 | 1 | 0 | 1 | 0 | 0 | 1 | 0 | 0 | 1 | 5 |
| <u>KIAA0090</u> | 1 | 1 | 0 | 1 | 0 | 0 | 1 | 0 | 0 | 1 | 5 |
| <u>RRP1B</u>    | 1 | 1 | 0 | 1 | 0 | 0 | 1 | 0 | 0 | 1 | 5 |
| <u>KIAA0241</u> | 1 | 1 | 0 | 1 | 0 | 0 | 1 | 0 | 0 | 1 | 5 |

|                  |   |   |   |   |   |   |   |   |   |   |   |
|------------------|---|---|---|---|---|---|---|---|---|---|---|
| <u>TRIM35</u>    | 1 | 1 | 0 | 1 | 0 | 0 | 1 | 0 | 0 | 1 | 5 |
| <u>MRPS27</u>    | 1 | 1 | 0 | 1 | 0 | 0 | 1 | 0 | 0 | 1 | 5 |
| <u>SPG20</u>     | 1 | 1 | 0 | 1 | 0 | 0 | 1 | 0 | 0 | 1 | 5 |
| <u>MAP3K7IP2</u> | 1 | 1 | 0 | 1 | 0 | 0 | 1 | 0 | 0 | 1 | 5 |
| <u>N4BP3</u>     | 1 | 1 | 0 | 1 | 0 | 0 | 1 | 0 | 0 | 1 | 5 |
| <u>GRAMD4</u>    | 1 | 1 | 0 | 1 | 0 | 0 | 1 | 1 | 0 | 0 | 5 |
| <u>CLCC1</u>     | 1 | 1 | 0 | 1 | 0 | 0 | 1 | 0 | 0 | 1 | 5 |
| <u>TBC1D9</u>    | 1 | 1 | 0 | 1 | 0 | 0 | 1 | 0 | 0 | 1 | 5 |
| <u>SEPT7</u>     | 1 | 1 | 0 | 1 | 0 | 0 | 1 | 0 | 0 | 1 | 5 |
| <u>FLOT2</u>     | 1 | 1 | 0 | 1 | 0 | 0 | 1 | 0 | 0 | 1 | 5 |
| <u>ATP11B</u>    | 1 | 1 | 0 | 1 | 0 | 0 | 1 | 0 | 0 | 1 | 5 |
| <u>ZFR2</u>      | 1 | 1 | 0 | 1 | 0 | 0 | 1 | 0 | 0 | 1 | 5 |
| <u>DTX4</u>      | 1 | 1 | 0 | 1 | 0 | 0 | 1 | 0 | 0 | 1 | 5 |
| <u>SNF1LK2</u>   | 1 | 1 | 0 | 1 | 0 | 0 | 1 | 0 | 0 | 1 | 5 |
| <u>PACS2</u>     | 1 | 1 | 0 | 1 | 0 | 0 | 1 | 0 | 0 | 1 | 5 |
| <u>COBL</u>      | 1 | 1 | 0 | 1 | 0 | 0 | 1 | 0 | 0 | 1 | 5 |
| <u>ATP11A</u>    | 1 | 1 | 0 | 1 | 0 | 0 | 1 | 0 | 0 | 1 | 5 |
| <u>KIAA1024</u>  | 1 | 1 | 0 | 1 | 0 | 0 | 1 | 0 | 0 | 1 | 5 |
| <u>ANKRD12</u>   | 1 | 1 | 0 | 1 | 0 | 0 | 1 | 0 | 0 | 1 | 5 |
| <u>CAMTA1</u>    | 1 | 1 | 0 | 1 | 0 | 0 | 1 | 0 | 0 | 1 | 5 |
| <u>CAMSAP1L1</u> | 1 | 1 | 0 | 1 | 0 | 0 | 1 | 0 | 0 | 1 | 5 |
| <u>SMG6</u>      | 1 | 1 | 0 | 1 | 0 | 0 | 1 | 0 | 0 | 1 | 5 |
| <u>BICD2</u>     | 1 | 1 | 0 | 1 | 1 | 0 | 1 | 0 | 0 | 0 | 5 |
| <u>ICOSLG</u>    | 1 | 1 | 0 | 1 | 0 | 0 | 1 | 0 | 0 | 1 | 5 |
| <u>SLC9A8</u>    | 1 | 1 | 0 | 1 | 0 | 0 | 1 | 0 | 0 | 1 | 5 |
| <u>SASH1</u>     | 1 | 1 | 0 | 1 | 0 | 0 | 1 | 0 | 0 | 1 | 5 |
| <u>WDR7</u>      | 1 | 1 | 0 | 1 | 0 | 0 | 1 | 0 | 0 | 1 | 5 |
| <u>KIAA1045</u>  | 1 | 1 | 0 | 1 | 0 | 0 | 1 | 0 | 0 | 1 | 5 |
| <u>SR140</u>     | 1 | 1 | 0 | 1 | 0 | 0 | 1 | 0 | 0 | 1 | 5 |
| <u>PSD3</u>      | 1 | 1 | 0 | 1 | 0 | 0 | 1 | 0 | 0 | 1 | 5 |
| <u>ARHGEF12</u>  | 1 | 1 | 0 | 1 | 0 | 0 | 1 | 0 | 0 | 1 | 5 |
| <u>SRGAP2</u>    | 1 | 1 | 0 | 1 | 0 | 0 | 1 | 0 | 0 | 1 | 5 |
| <u>SPECC1L</u>   | 1 | 0 | 0 | 1 | 1 | 0 | 1 | 0 | 0 | 1 | 5 |
| <u>ZDHHC17</u>   | 1 | 1 | 0 | 1 | 0 | 0 | 1 | 0 | 0 | 1 | 5 |
| <u>NCAPH</u>     | 1 | 1 | 0 | 1 | 0 | 0 | 1 | 0 | 0 | 1 | 5 |
| <u>FRAT2</u>     | 1 | 1 | 0 | 1 | 0 | 0 | 1 | 0 | 0 | 1 | 5 |
| <u>EXOSC2</u>    | 1 | 1 | 0 | 1 | 0 | 0 | 1 | 0 | 0 | 1 | 5 |
| <u>FREQ</u>      | 1 | 1 | 0 | 1 | 0 | 0 | 1 | 0 | 0 | 1 | 5 |
| <u>ICMT</u>      | 1 | 1 | 0 | 1 | 0 | 0 | 1 | 0 | 0 | 1 | 5 |
| <u>POFUT1</u>    | 1 | 1 | 0 | 1 | 0 | 0 | 1 | 0 | 0 | 1 | 5 |
| <u>KCTD2</u>     | 1 | 1 | 0 | 1 | 0 | 0 | 1 | 0 | 0 | 1 | 5 |

|                 |   |   |   |   |   |   |   |   |   |   |   |
|-----------------|---|---|---|---|---|---|---|---|---|---|---|
| <u>HYAL4</u>    | 1 | 1 | 0 | 1 | 0 | 0 | 1 | 0 | 0 | 1 | 5 |
| <u>DDX58</u>    | 1 | 1 | 0 | 1 | 0 | 0 | 1 | 0 | 0 | 1 | 5 |
| <u>FPRL2</u>    | 1 | 1 | 0 | 1 | 0 | 0 | 1 | 0 | 0 | 1 | 5 |
| <u>CD2AP</u>    | 1 | 1 | 0 | 1 | 0 | 0 | 1 | 0 | 0 | 1 | 5 |
| <u>ZMYND8</u>   | 1 | 1 | 0 | 1 | 1 | 0 | 1 | 0 | 0 | 0 | 5 |
| <u>PRND</u>     | 1 | 1 | 0 | 1 | 0 | 0 | 1 | 0 | 0 | 1 | 5 |
| <u>STX12</u>    | 1 | 1 | 0 | 1 | 0 | 0 | 1 | 0 | 0 | 1 | 5 |
| <u>SGK3</u>     | 1 | 1 | 0 | 1 | 0 | 0 | 1 | 0 | 0 | 1 | 5 |
| <u>RAB38</u>    | 1 | 1 | 0 | 1 | 0 | 0 | 1 | 0 | 0 | 1 | 5 |
| <u>SDF2L1</u>   | 1 | 1 | 0 | 1 | 1 | 0 | 1 | 0 | 0 | 0 | 5 |
| <u>MTCH2</u>    | 1 | 1 | 0 | 1 | 1 | 0 | 1 | 0 | 0 | 0 | 5 |
| <u>PANX1</u>    | 1 | 1 | 0 | 1 | 0 | 0 | 1 | 0 | 0 | 1 | 5 |
| <u>VGLL2</u>    | 1 | 1 | 0 | 1 | 0 | 0 | 1 | 0 | 0 | 1 | 5 |
| <u>ATP6V0D2</u> | 1 | 1 | 0 | 1 | 0 | 0 | 1 | 0 | 0 | 1 | 5 |
| <u>CNOT6L</u>   | 1 | 1 | 0 | 1 | 0 | 0 | 1 | 0 | 0 | 1 | 5 |
| <u>LACE1</u>    | 1 | 1 | 0 | 1 | 0 | 0 | 1 | 0 | 0 | 1 | 5 |
| <u>FUT4</u>     | 1 | 1 | 0 | 1 | 0 | 0 | 1 | 0 | 0 | 1 | 5 |
| <u>STXBP4</u>   | 1 | 1 | 0 | 1 | 0 | 0 | 1 | 0 | 0 | 1 | 5 |
| <u>SRD5A2L2</u> | 1 | 1 | 0 | 1 | 0 | 0 | 1 | 0 | 0 | 1 | 5 |
| <u>KDSR</u>     | 1 | 1 | 0 | 1 | 0 | 0 | 1 | 0 | 0 | 1 | 5 |
| <u>RICTOR</u>   | 1 | 1 | 0 | 1 | 0 | 0 | 1 | 0 | 0 | 1 | 5 |
| <u>FYB</u>      | 1 | 1 | 0 | 1 | 0 | 0 | 1 | 0 | 0 | 1 | 5 |
| <u>CADM2</u>    | 1 | 1 | 0 | 1 | 1 | 0 | 1 | 0 | 0 | 0 | 5 |
| <u>LASS6</u>    | 1 | 1 | 0 | 1 | 0 | 0 | 1 | 0 | 0 | 1 | 5 |
| <u>YTHDF3</u>   | 0 | 1 | 0 | 1 | 1 | 0 | 1 | 0 | 0 | 1 | 5 |
| <u>MGC50559</u> | 1 | 0 | 1 | 1 | 0 | 0 | 1 | 0 | 0 | 1 | 5 |
| <u>RNF169</u>   | 1 | 1 | 0 | 1 | 0 | 0 | 1 | 0 | 0 | 1 | 5 |
| <u>FAM26E</u>   | 1 | 1 | 0 | 1 | 0 | 0 | 1 | 0 | 0 | 1 | 5 |
| <u>MCM9</u>     | 0 | 1 | 0 | 1 | 0 | 0 | 1 | 1 | 0 | 1 | 5 |
| <u>LYG2</u>     | 1 | 1 | 0 | 1 | 0 | 0 | 1 | 0 | 0 | 1 | 5 |
| <u>GABRA1</u>   | 1 | 0 | 0 | 1 | 1 | 1 | 0 | 0 | 0 | 1 | 5 |
| <u>PAN3</u>     | 1 | 1 | 0 | 1 | 0 | 0 | 1 | 0 | 0 | 1 | 5 |
| <u>ZNF549</u>   | 1 | 1 | 0 | 1 | 0 | 0 | 1 | 0 | 0 | 1 | 5 |
| <u>GABRB2</u>   | 1 | 1 | 0 | 1 | 0 | 0 | 1 | 0 | 0 | 1 | 5 |
| <u>GK5</u>      | 1 | 1 | 0 | 1 | 0 | 0 | 1 | 0 | 0 | 1 | 5 |
| <u>GABRG2</u>   | 1 | 1 | 0 | 1 | 0 | 0 | 1 | 0 | 0 | 1 | 5 |
| <u>WDR72</u>    | 1 | 1 | 0 | 1 | 0 | 0 | 1 | 0 | 0 | 1 | 5 |
| <u>C10orf67</u> | 1 | 1 | 0 | 1 | 0 | 0 | 1 | 0 | 0 | 1 | 5 |
| <u>NEGR1</u>    | 1 | 1 | 0 | 1 | 0 | 0 | 1 | 0 | 0 | 1 | 5 |
| <u>C11orf41</u> | 0 | 1 | 1 | 1 | 0 | 0 | 1 | 0 | 0 | 1 | 5 |
| <u>DNAJB5</u>   | 1 | 0 | 0 | 1 | 1 | 0 | 1 | 0 | 0 | 1 | 5 |

|                 |   |   |   |   |   |   |   |   |   |   |   |
|-----------------|---|---|---|---|---|---|---|---|---|---|---|
| <u>ABTB2</u>    | 1 | 1 | 0 | 1 | 0 | 0 | 1 | 0 | 0 | 1 | 5 |
| <u>FAM119B</u>  | 1 | 1 | 0 | 1 | 0 | 0 | 1 | 0 | 0 | 1 | 5 |
| <u>GALNT2</u>   | 1 | 1 | 0 | 1 | 0 | 0 | 1 | 0 | 0 | 1 | 5 |
| <u>IFFO</u>     | 1 | 1 | 0 | 1 | 0 | 0 | 1 | 0 | 0 | 1 | 5 |
| <u>GALNT3</u>   | 1 | 1 | 0 | 1 | 0 | 0 | 1 | 0 | 0 | 1 | 5 |
| <u>C1orf43</u>  | 1 | 1 | 0 | 1 | 0 | 0 | 1 | 0 | 0 | 1 | 5 |
| <u>THUMPD3</u>  | 1 | 1 | 0 | 1 | 0 | 0 | 1 | 0 | 0 | 1 | 5 |
| <u>NSL1</u>     | 1 | 1 | 0 | 1 | 0 | 0 | 1 | 0 | 0 | 1 | 5 |
| <u>C2CD2</u>    | 1 | 1 | 0 | 1 | 0 | 0 | 1 | 0 | 0 | 1 | 5 |
| <u>DAK</u>      | 1 | 1 | 0 | 1 | 0 | 0 | 1 | 0 | 0 | 1 | 5 |
| <u>ODZ4</u>     | 1 | 1 | 0 | 1 | 0 | 0 | 1 | 0 | 0 | 1 | 5 |
| <u>OSBPL3</u>   | 1 | 0 | 0 | 1 | 1 | 1 | 0 | 0 | 0 | 1 | 5 |
| <u>OSBPL3</u>   | 1 | 0 | 0 | 1 | 1 | 1 | 0 | 0 | 0 | 1 | 5 |
| <u>OSBPL3</u>   | 1 | 0 | 0 | 1 | 1 | 1 | 0 | 0 | 0 | 1 | 5 |
| <u>SUSD5</u>    | 1 | 1 | 0 | 1 | 0 | 0 | 1 | 0 | 0 | 1 | 5 |
| <u>ATRNL1</u>   | 1 | 1 | 0 | 1 | 0 | 0 | 1 | 0 | 0 | 1 | 5 |
| <u>ZNF294</u>   | 1 | 1 | 0 | 1 | 0 | 0 | 1 | 0 | 0 | 1 | 5 |
| <u>KIAA0888</u> | 1 | 1 | 0 | 1 | 0 | 0 | 1 | 0 | 0 | 1 | 5 |
| <u>AUTS2</u>    | 1 | 1 | 0 | 1 | 0 | 0 | 1 | 0 | 0 | 1 | 5 |
| <u>KLK13</u>    | 1 | 1 | 0 | 1 | 0 | 0 | 1 | 0 | 0 | 1 | 5 |
| <u>WDR21A</u>   | 1 | 1 | 0 | 1 | 0 | 0 | 1 | 0 | 0 | 1 | 5 |
| <u>TANC2</u>    | 1 | 1 | 0 | 1 | 0 | 0 | 1 | 0 | 0 | 1 | 5 |
| <u>TCTN3</u>    | 1 | 1 | 0 | 1 | 0 | 0 | 1 | 0 | 0 | 1 | 5 |
| <u>FBXW2</u>    | 1 | 1 | 0 | 1 | 0 | 0 | 1 | 0 | 0 | 1 | 5 |
| <u>GATA2</u>    | 1 | 1 | 0 | 1 | 0 | 0 | 1 | 0 | 0 | 1 | 5 |
| <u>FBXO5</u>    | 1 | 1 | 0 | 1 | 0 | 0 | 1 | 0 | 0 | 1 | 5 |
| <u>VPS33B</u>   | 1 | 1 | 0 | 1 | 0 | 0 | 1 | 0 | 0 | 1 | 5 |
| <u>LHX6</u>     | 1 | 1 | 0 | 1 | 0 | 0 | 1 | 0 | 0 | 1 | 5 |
| <u>NR6A1</u>    | 1 | 0 | 0 | 1 | 1 | 1 | 0 | 0 | 0 | 1 | 5 |
| <u>CNNM3</u>    | 1 | 1 | 0 | 1 | 0 | 0 | 1 | 0 | 0 | 1 | 5 |
| <u>CKAP2</u>    | 1 | 1 | 0 | 1 | 0 | 0 | 1 | 0 | 0 | 1 | 5 |
| <u>GDI1</u>     | 1 | 1 | 0 | 1 | 0 | 0 | 1 | 0 | 0 | 1 | 5 |
| <u>HS6ST3</u>   | 0 | 1 | 1 | 1 | 0 | 0 | 1 | 0 | 0 | 1 | 5 |
| <u>MDGA1</u>    | 1 | 1 | 0 | 1 | 0 | 0 | 1 | 0 | 0 | 1 | 5 |
| <u>RPS6KC1</u>  | 1 | 1 | 0 | 1 | 0 | 0 | 1 | 0 | 0 | 1 | 5 |
| <u>GGT7</u>     | 1 | 1 | 0 | 1 | 1 | 0 | 1 | 0 | 0 | 0 | 5 |
| <u>CHORDC1</u>  | 1 | 1 | 0 | 1 | 0 | 0 | 1 | 0 | 0 | 1 | 5 |
| <u>SEC22A</u>   | 1 | 1 | 0 | 1 | 0 | 0 | 1 | 1 | 0 | 0 | 5 |
| <u>VPS41</u>    | 1 | 1 | 0 | 1 | 0 | 0 | 1 | 0 | 0 | 1 | 5 |
| <u>CACYBP</u>   | 1 | 1 | 0 | 1 | 0 | 0 | 1 | 0 | 0 | 1 | 5 |
| <u>EIF2AK1</u>  | 1 | 1 | 0 | 1 | 0 | 0 | 1 | 0 | 0 | 1 | 5 |

|                  |   |   |   |   |   |   |   |   |   |   |   |
|------------------|---|---|---|---|---|---|---|---|---|---|---|
| <u>TMEM28</u>    | 1 | 1 | 0 | 1 | 1 | 0 | 1 | 0 | 0 | 0 | 5 |
| <u>DISC1</u>     | 1 | 1 | 0 | 1 | 0 | 0 | 1 | 0 | 0 | 1 | 5 |
| <u>ZNF364</u>    | 1 | 1 | 0 | 1 | 0 | 0 | 1 | 0 | 0 | 1 | 5 |
| <u>PCDH11X</u>   | 1 | 1 | 0 | 1 | 0 | 0 | 1 | 0 | 0 | 1 | 5 |
| <u>POLM</u>      | 1 | 1 | 0 | 1 | 0 | 0 | 1 | 0 | 0 | 1 | 5 |
| <u>GNS</u>       | 1 | 1 | 0 | 1 | 0 | 0 | 1 | 0 | 0 | 1 | 5 |
| <u>GOLGA3</u>    | 1 | 1 | 0 | 1 | 0 | 0 | 1 | 0 | 0 | 1 | 5 |
| <u>GOT1</u>      | 1 | 1 | 0 | 1 | 0 | 0 | 1 | 0 | 0 | 1 | 5 |
| <u>GPD2</u>      | 1 | 0 | 1 | 1 | 0 | 0 | 1 | 0 | 0 | 1 | 5 |
| <u>GPLD1</u>     | 1 | 1 | 0 | 1 | 0 | 0 | 1 | 0 | 0 | 1 | 5 |
| <u>WDR51B</u>    | 1 | 1 | 0 | 1 | 0 | 0 | 1 | 0 | 0 | 1 | 5 |
| <u>STK32C</u>    | 1 | 1 | 0 | 1 | 0 | 0 | 1 | 0 | 0 | 1 | 5 |
| <u>PGM2L1</u>    | 1 | 1 | 0 | 1 | 0 | 0 | 1 | 0 | 0 | 1 | 5 |
| <u>DPY19L2</u>   | 1 | 1 | 0 | 1 | 0 | 0 | 1 | 0 | 0 | 1 | 5 |
| <u>FAM100B</u>   | 1 | 1 | 0 | 1 | 0 | 0 | 1 | 0 | 0 | 1 | 5 |
| <u>TMEM105</u>   | 1 | 1 | 0 | 1 | 0 | 0 | 1 | 0 | 0 | 1 | 5 |
| <u>ZADH2</u>     | 1 | 1 | 0 | 1 | 0 | 0 | 1 | 0 | 0 | 1 | 5 |
| <u>ZNF547</u>    | 1 | 1 | 0 | 1 | 0 | 0 | 1 | 0 | 0 | 1 | 5 |
| <u>C19orf54</u>  | 1 | 1 | 0 | 1 | 0 | 0 | 1 | 0 | 0 | 1 | 5 |
| <u>ZNF575</u>    | 1 | 1 | 0 | 1 | 0 | 0 | 1 | 0 | 0 | 1 | 5 |
| <u>ZNF545</u>    | 0 | 1 | 1 | 1 | 0 | 0 | 1 | 0 | 0 | 1 | 5 |
| <u>GPR22</u>     | 1 | 1 | 0 | 1 | 0 | 0 | 1 | 0 | 0 | 1 | 5 |
| <u>FAM102B</u>   | 1 | 1 | 0 | 1 | 0 | 0 | 1 | 0 | 0 | 1 | 5 |
| <u>SYPL2</u>     | 1 | 1 | 0 | 1 | 0 | 0 | 1 | 0 | 0 | 1 | 5 |
| <u>GPR26</u>     | 1 | 1 | 0 | 1 | 0 | 0 | 1 | 1 | 0 | 0 | 5 |
| <u>RABL3</u>     | 1 | 1 | 0 | 1 | 0 | 0 | 1 | 0 | 0 | 1 | 5 |
| <u>C3orf23</u>   | 1 | 1 | 0 | 1 | 0 | 0 | 1 | 0 | 0 | 1 | 5 |
| <u>LOC285636</u> | 1 | 1 | 0 | 1 | 0 | 0 | 1 | 0 | 0 | 1 | 5 |
| <u>SFRS12IP1</u> | 1 | 1 | 0 | 1 | 0 | 0 | 1 | 0 | 0 | 1 | 5 |
| <u>ANK1</u>      | 1 | 1 | 0 | 1 | 0 | 0 | 1 | 0 | 0 | 1 | 5 |
| <u>ILDR1</u>     | 1 | 1 | 0 | 1 | 0 | 0 | 1 | 0 | 0 | 1 | 5 |
| <u>MKNK2</u>     | 1 | 1 | 0 | 1 | 0 | 0 | 1 | 0 | 0 | 1 | 5 |
| <u>GRB10</u>     | 1 | 0 | 1 | 1 | 0 | 0 | 1 | 0 | 0 | 1 | 5 |
| <u>C16orf72</u>  | 1 | 1 | 0 | 1 | 0 | 0 | 1 | 0 | 0 | 1 | 5 |
| <u>NR3C1</u>     | 1 | 0 | 0 | 1 | 1 | 1 | 0 | 0 | 0 | 1 | 5 |
| <u>NR3C1</u>     | 1 | 0 | 1 | 1 | 0 | 0 | 1 | 0 | 0 | 1 | 5 |
| <u>RNASEN</u>    | 1 | 1 | 0 | 1 | 0 | 0 | 1 | 0 | 0 | 1 | 5 |
| <u>CXCL1</u>     | 0 | 1 | 1 | 1 | 0 | 0 | 1 | 0 | 0 | 1 | 5 |
| <u>GTF2E1</u>    | 1 | 1 | 0 | 1 | 0 | 0 | 1 | 0 | 0 | 1 | 5 |
| <u>GTF2H1</u>    | 1 | 1 | 0 | 1 | 0 | 0 | 1 | 0 | 0 | 1 | 5 |
| <u>TFCP2L1</u>   | 1 | 1 | 0 | 1 | 0 | 0 | 1 | 0 | 0 | 1 | 5 |



|         |   |   |   |   |   |   |   |   |   |   |   |
|---------|---|---|---|---|---|---|---|---|---|---|---|
| H3F3B   | 1 | 1 | 0 | 1 | 0 | 0 | 1 | 0 | 0 | 1 | 5 |
| HTT     | 1 | 1 | 0 | 1 | 0 | 0 | 1 | 0 | 0 | 1 | 5 |
| HLA-C   | 1 | 1 | 0 | 1 | 0 | 0 | 1 | 0 | 0 | 1 | 5 |
| HMGB3   | 1 | 1 | 0 | 1 | 0 | 0 | 1 | 0 | 0 | 1 | 5 |
| HMGCL   | 1 | 1 | 0 | 1 | 0 | 0 | 1 | 0 | 0 | 1 | 5 |
| HNF4G   | 1 | 1 | 0 | 1 | 0 | 0 | 1 | 0 | 0 | 1 | 5 |
| HNMT    | 1 | 1 | 0 | 1 | 0 | 0 | 1 | 0 | 0 | 1 | 5 |
| ACACB   | 1 | 1 | 0 | 1 | 0 | 0 | 1 | 0 | 0 | 1 | 5 |
| HOXC11  | 1 | 1 | 0 | 1 | 0 | 0 | 1 | 0 | 0 | 1 | 5 |
| HPGD    | 1 | 1 | 0 | 1 | 0 | 0 | 1 | 0 | 0 | 1 | 5 |
| HRB     | 1 | 0 | 0 | 1 | 1 | 0 | 1 | 0 | 0 | 1 | 5 |
| HRBL    | 1 | 1 | 0 | 1 | 0 | 0 | 1 | 0 | 0 | 1 | 5 |
| HRH1    | 1 | 0 | 1 | 1 | 0 | 0 | 1 | 0 | 0 | 1 | 5 |
| HSD3B1  | 1 | 1 | 0 | 1 | 0 | 0 | 1 | 0 | 0 | 1 | 5 |
| HSD11B1 | 1 | 1 | 0 | 1 | 0 | 0 | 1 | 0 | 0 | 1 | 5 |
| HSPA1L  | 1 | 1 | 0 | 1 | 0 | 0 | 0 | 0 | 1 | 1 | 5 |
| XIAP    | 1 | 1 | 0 | 1 | 0 | 0 | 1 | 0 | 0 | 1 | 5 |
| BIRC5   | 1 | 1 | 0 | 1 | 0 | 0 | 1 | 0 | 0 | 1 | 5 |
| DNAJB1  | 1 | 1 | 0 | 1 | 0 | 0 | 1 | 0 | 0 | 1 | 5 |
| HTR2C   | 1 | 1 | 0 | 1 | 0 | 0 | 1 | 0 | 0 | 1 | 5 |
| IRF8    | 1 | 1 | 0 | 1 | 0 | 0 | 1 | 0 | 0 | 1 | 5 |
| ZC3H12B | 1 | 1 | 0 | 1 | 0 | 0 | 1 | 0 | 0 | 1 | 5 |
| IDH1    | 1 | 1 | 0 | 1 | 0 | 0 | 1 | 0 | 0 | 1 | 5 |
| IDH3A   | 1 | 1 | 0 | 1 | 0 | 0 | 1 | 0 | 0 | 1 | 5 |
| ZSCAN22 | 1 | 1 | 0 | 1 | 0 | 0 | 1 | 0 | 0 | 1 | 5 |
| PLCXD3  | 1 | 1 | 0 | 1 | 0 | 0 | 1 | 0 | 0 | 1 | 5 |
| MTX3    | 0 | 1 | 1 | 1 | 0 | 0 | 1 | 0 | 0 | 1 | 5 |
| IFNG    | 1 | 1 | 0 | 1 | 0 | 0 | 1 | 0 | 0 | 1 | 5 |
| ZNF81   | 1 | 1 | 0 | 1 | 0 | 0 | 1 | 0 | 0 | 1 | 5 |
| FAM33A  | 1 | 1 | 0 | 1 | 0 | 0 | 1 | 0 | 0 | 1 | 5 |
| BMP8A   | 1 | 1 | 0 | 1 | 0 | 0 | 1 | 0 | 0 | 1 | 5 |
| IL1B    | 1 | 1 | 0 | 1 | 0 | 0 | 1 | 0 | 0 | 1 | 5 |
| IL1R1   | 1 | 1 | 0 | 1 | 0 | 0 | 1 | 0 | 0 | 1 | 5 |
| IL1RAP  | 1 | 1 | 0 | 1 | 0 | 0 | 1 | 0 | 0 | 1 | 5 |
| FASLG   | 1 | 1 | 0 | 1 | 0 | 0 | 1 | 0 | 0 | 1 | 5 |
| IL7     | 1 | 1 | 0 | 1 | 0 | 0 | 1 | 0 | 0 | 1 | 5 |
| IL10RA  | 1 | 1 | 0 | 1 | 0 | 0 | 1 | 0 | 0 | 1 | 5 |
| AQP2    | 1 | 1 | 0 | 1 | 0 | 0 | 1 | 0 | 0 | 1 | 5 |
| FAM101B | 1 | 1 | 0 | 1 | 0 | 0 | 1 | 0 | 0 | 1 | 5 |
| ZBTB41  | 1 | 1 | 0 | 1 | 0 | 0 | 1 | 0 | 0 | 1 | 5 |
| IL16    | 1 | 1 | 0 | 1 | 0 | 0 | 1 | 0 | 0 | 1 | 5 |

|                  |   |   |   |   |   |   |   |   |   |   |   |
|------------------|---|---|---|---|---|---|---|---|---|---|---|
| <u>AQP4</u>      | 1 | 1 | 0 | 1 | 0 | 0 | 1 | 0 | 0 | 1 | 5 |
| <u>IMPG1</u>     | 1 | 1 | 0 | 1 | 0 | 0 | 1 | 0 | 0 | 1 | 5 |
| <u>INCENP</u>    | 1 | 1 | 0 | 1 | 0 | 0 | 1 | 0 | 0 | 1 | 5 |
| <u>INSR</u>      | 1 | 1 | 0 | 1 | 0 | 0 | 1 | 0 | 0 | 1 | 5 |
| <u>IREB2</u>     | 1 | 1 | 0 | 1 | 0 | 0 | 1 | 0 | 0 | 1 | 5 |
| <u>IRF5</u>      | 1 | 0 | 1 | 1 | 0 | 0 | 1 | 0 | 0 | 1 | 5 |
| <u>ITGA3</u>     | 1 | 1 | 0 | 1 | 1 | 0 | 0 | 0 | 0 | 1 | 5 |
| <u>ITPR2</u>     | 1 | 1 | 0 | 1 | 0 | 0 | 1 | 0 | 0 | 1 | 5 |
| <u>KCNA1</u>     | 1 | 1 | 0 | 1 | 0 | 0 | 1 | 0 | 0 | 1 | 5 |
| <u>KCNB1</u>     | 1 | 1 | 0 | 1 | 0 | 0 | 1 | 0 | 0 | 1 | 5 |
| <u>SFT2D2</u>    | 1 | 1 | 0 | 1 | 0 | 0 | 1 | 0 | 0 | 1 | 5 |
| <u>LHFPL3</u>    | 0 | 1 | 1 | 1 | 0 | 0 | 1 | 0 | 0 | 1 | 5 |
| <u>KCNJ2</u>     | 1 | 1 | 0 | 1 | 0 | 0 | 1 | 0 | 0 | 1 | 5 |
| <u>KCNJ5</u>     | 1 | 1 | 0 | 1 | 0 | 0 | 1 | 0 | 0 | 1 | 5 |
| <u>KCNJ10</u>    | 1 | 1 | 0 | 1 | 0 | 0 | 1 | 0 | 0 | 1 | 5 |
| <u>CA13</u>      | 1 | 1 | 0 | 1 | 0 | 0 | 1 | 0 | 0 | 1 | 5 |
| <u>KCNN1</u>     | 1 | 1 | 0 | 1 | 0 | 0 | 1 | 0 | 0 | 1 | 5 |
| <u>KIF5A</u>     | 1 | 1 | 0 | 1 | 0 | 0 | 1 | 0 | 0 | 1 | 5 |
| <u>ARF6</u>      | 0 | 1 | 1 | 1 | 0 | 0 | 1 | 0 | 0 | 1 | 5 |
| <u>TNPO1</u>     | 1 | 0 | 1 | 1 | 0 | 0 | 1 | 0 | 0 | 1 | 5 |
| <u>C6orf190</u>  | 1 | 1 | 0 | 1 | 0 | 0 | 1 | 0 | 0 | 1 | 5 |
| <u>SH2D4B</u>    | 1 | 1 | 0 | 1 | 0 | 0 | 1 | 0 | 0 | 1 | 5 |
| <u>LOC387856</u> | 1 | 1 | 0 | 1 | 0 | 0 | 1 | 0 | 0 | 1 | 5 |
| <u>NHLRC3</u>    | 1 | 1 | 0 | 1 | 0 | 0 | 1 | 0 | 0 | 1 | 5 |
| <u>C15orf52</u>  | 1 | 1 | 0 | 1 | 0 | 0 | 1 | 0 | 0 | 1 | 5 |
| <u>SBK1</u>      | 1 | 1 | 0 | 1 | 0 | 0 | 1 | 0 | 0 | 1 | 5 |
| <u>YPEL2</u>     | 1 | 1 | 0 | 1 | 0 | 0 | 1 | 0 | 0 | 1 | 5 |
| <u>LOC388610</u> | 0 | 1 | 1 | 1 | 0 | 0 | 1 | 0 | 0 | 1 | 5 |
| <u>VGLL3</u>     | 1 | 1 | 0 | 1 | 0 | 0 | 1 | 0 | 0 | 1 | 5 |
| <u>CCDC4</u>     | 1 | 1 | 0 | 1 | 0 | 0 | 1 | 0 | 0 | 1 | 5 |
| <u>IYD</u>       | 1 | 1 | 0 | 1 | 0 | 0 | 1 | 0 | 0 | 1 | 5 |
| <u>RHOG</u>      | 1 | 1 | 0 | 1 | 0 | 0 | 1 | 0 | 0 | 1 | 5 |
| <u>LAMC1</u>     | 1 | 1 | 0 | 1 | 0 | 0 | 1 | 0 | 0 | 1 | 5 |
| <u>LAMC2</u>     | 1 | 1 | 0 | 1 | 0 | 0 | 1 | 1 | 0 | 0 | 5 |
| <u>ARHGAP5</u>   | 1 | 1 | 0 | 1 | 0 | 0 | 1 | 0 | 0 | 1 | 5 |
| <u>LDLR</u>      | 1 | 1 | 0 | 1 | 0 | 0 | 1 | 0 | 0 | 1 | 5 |
| <u>LIF</u>       | 1 | 1 | 0 | 1 | 0 | 0 | 1 | 0 | 0 | 1 | 5 |
| <u>FADS1</u>     | 1 | 1 | 0 | 1 | 0 | 0 | 1 | 0 | 0 | 1 | 5 |
| <u>FAM102A</u>   | 1 | 1 | 0 | 1 | 0 | 0 | 1 | 0 | 0 | 1 | 5 |
| <u>ARL1</u>      | 1 | 1 | 0 | 1 | 0 | 0 | 1 | 0 | 0 | 1 | 5 |
| <u>C15orf54</u>  | 1 | 1 | 0 | 1 | 0 | 0 | 1 | 0 | 0 | 1 | 5 |

|                    |   |   |   |   |   |   |   |   |   |   |   |
|--------------------|---|---|---|---|---|---|---|---|---|---|---|
| <u>SAMD12</u>      | 1 | 1 | 0 | 1 | 0 | 0 | 1 | 0 | 0 | 1 | 5 |
| <u>SNX30</u>       | 1 | 1 | 0 | 1 | 0 | 0 | 1 | 0 | 0 | 1 | 5 |
| <u>MCART6</u>      | 1 | 1 | 0 | 1 | 0 | 0 | 1 | 0 | 0 | 1 | 5 |
| <u>C10orf132</u>   | 1 | 1 | 0 | 1 | 0 | 0 | 1 | 0 | 0 | 1 | 5 |
| <u>ARL3</u>        | 1 | 1 | 0 | 1 | 0 | 0 | 1 | 0 | 0 | 1 | 5 |
| <u>LRP4</u>        | 1 | 1 | 0 | 1 | 0 | 0 | 1 | 0 | 0 | 1 | 5 |
| <u>HAPLN4</u>      | 1 | 1 | 0 | 1 | 0 | 0 | 1 | 0 | 0 | 1 | 5 |
| <u>SMAD2</u>       | 1 | 1 | 0 | 1 | 0 | 0 | 1 | 0 | 0 | 1 | 5 |
| <u>ARRB2</u>       | 1 | 1 | 0 | 1 | 0 | 0 | 1 | 0 | 0 | 1 | 5 |
| <u>MAF</u>         | 1 | 1 | 0 | 1 | 0 | 0 | 1 | 0 | 0 | 1 | 5 |
| <u>MAGEA4</u>      | 1 | 0 | 1 | 1 | 0 | 0 | 1 | 0 | 0 | 1 | 5 |
| <u>MAN2A2</u>      | 1 | 1 | 0 | 1 | 0 | 0 | 1 | 0 | 0 | 1 | 5 |
| <u>MAOA</u>        | 1 | 1 | 0 | 1 | 0 | 0 | 1 | 0 | 0 | 1 | 5 |
| <u>MAP2</u>        | 1 | 1 | 0 | 1 | 0 | 0 | 1 | 0 | 0 | 1 | 5 |
| <u>MATN3</u>       | 0 | 1 | 1 | 1 | 0 | 0 | 1 | 0 | 0 | 1 | 5 |
| <u>MBNL1</u>       | 1 | 0 | 1 | 1 | 0 | 0 | 1 | 0 | 0 | 1 | 5 |
| <u>MBP</u>         | 1 | 1 | 0 | 1 | 0 | 0 | 1 | 0 | 0 | 1 | 5 |
| <u>MC2R</u>        | 1 | 1 | 0 | 1 | 0 | 0 | 1 | 0 | 0 | 1 | 5 |
| <u>MCC</u>         | 0 | 1 | 1 | 1 | 0 | 0 | 1 | 0 | 0 | 1 | 5 |
| <u>CHST6</u>       | 1 | 1 | 0 | 1 | 0 | 0 | 1 | 0 | 0 | 1 | 5 |
| <u>MCM3</u>        | 1 | 1 | 0 | 1 | 0 | 0 | 1 | 0 | 1 | 0 | 5 |
| <u>MCM6</u>        | 1 | 1 | 0 | 1 | 0 | 0 | 1 | 0 | 0 | 1 | 5 |
| <u>ME2</u>         | 1 | 1 | 0 | 1 | 0 | 0 | 1 | 0 | 0 | 1 | 5 |
| <u>MECP2</u>       | 1 | 0 | 0 | 1 | 1 | 0 | 1 | 0 | 0 | 1 | 5 |
| <u>MEIS2</u>       | 1 | 1 | 0 | 1 | 1 | 1 | 0 | 0 | 0 | 0 | 5 |
| <u>MEIS2</u>       | 1 | 1 | 0 | 1 | 1 | 1 | 0 | 0 | 0 | 0 | 5 |
| <u>MEST</u>        | 1 | 1 | 0 | 1 | 0 | 0 | 1 | 0 | 0 | 1 | 5 |
| <u>MAP3K9</u>      | 1 | 1 | 0 | 1 | 0 | 0 | 1 | 0 | 0 | 1 | 5 |
| <u>MMP7</u>        | 1 | 1 | 0 | 1 | 0 | 0 | 1 | 0 | 0 | 1 | 5 |
| <u>MMP8</u>        | 1 | 1 | 0 | 1 | 0 | 0 | 1 | 0 | 0 | 1 | 5 |
| <u>MMP10</u>       | 1 | 1 | 0 | 1 | 0 | 0 | 1 | 0 | 0 | 1 | 5 |
| <u>MMP13</u>       | 1 | 1 | 0 | 1 | 0 | 0 | 1 | 1 | 0 | 0 | 5 |
| <u>MN1</u>         | 1 | 1 | 0 | 1 | 0 | 0 | 1 | 1 | 0 | 0 | 5 |
| <u>MPP3</u>        | 1 | 1 | 0 | 1 | 0 | 0 | 1 | 0 | 0 | 1 | 5 |
| <u>LOC440087</u>   | 1 | 1 | 0 | 1 | 0 | 0 | 1 | 0 | 0 | 1 | 5 |
| <u>RP11-11C5.2</u> | 1 | 1 | 0 | 1 | 0 | 0 | 1 | 0 | 0 | 1 | 5 |
| <u>MSII</u>        | 1 | 1 | 0 | 1 | 0 | 0 | 1 | 0 | 0 | 1 | 5 |
| <u>MSR1</u>        | 1 | 1 | 0 | 1 | 0 | 0 | 1 | 0 | 0 | 1 | 5 |
| <u>MTAP</u>        | 1 | 1 | 0 | 1 | 0 | 0 | 1 | 0 | 0 | 1 | 5 |
| <u>MTF1</u>        | 1 | 1 | 0 | 1 | 0 | 0 | 1 | 0 | 0 | 1 | 5 |
| <u>ASTN1</u>       | 1 | 1 | 0 | 1 | 0 | 0 | 1 | 0 | 0 | 1 | 5 |

|                |   |   |   |   |   |   |   |   |   |   |   |
|----------------|---|---|---|---|---|---|---|---|---|---|---|
| <u>MYCN</u>    | 1 | 1 | 0 | 1 | 1 | 0 | 1 | 0 | 0 | 0 | 5 |
| <u>ZFH3</u>    | 1 | 1 | 0 | 1 | 0 | 0 | 1 | 0 | 0 | 1 | 5 |
| <u>MYO5A</u>   | 1 | 1 | 0 | 1 | 0 | 0 | 1 | 0 | 0 | 1 | 5 |
| <u>MYO5B</u>   | 1 | 1 | 0 | 1 | 0 | 0 | 1 | 0 | 0 | 1 | 5 |
| <u>NBL1</u>    | 1 | 1 | 0 | 1 | 0 | 0 | 1 | 1 | 0 | 0 | 5 |
| <u>NCBP1</u>   | 1 | 1 | 0 | 1 | 0 | 0 | 1 | 0 | 0 | 1 | 5 |
| <u>NF1</u>     | 1 | 1 | 0 | 1 | 0 | 0 | 1 | 0 | 0 | 1 | 5 |
| <u>NFYC</u>    | 1 | 0 | 0 | 1 | 0 | 0 | 1 | 0 | 1 | 1 | 5 |
| <u>ATP1B1</u>  | 0 | 1 | 0 | 1 | 1 | 1 | 0 | 0 | 0 | 1 | 5 |
| <u>NKTR</u>    | 1 | 1 | 0 | 1 | 0 | 0 | 1 | 0 | 0 | 1 | 5 |
| <u>NKX2-2</u>  | 1 | 1 | 0 | 1 | 1 | 0 | 1 | 0 | 0 | 0 | 5 |
| <u>NOTCH4</u>  | 1 | 1 | 1 | 1 | 0 | 0 | 0 | 0 | 0 | 1 | 5 |
| <u>NPAT</u>    | 1 | 1 | 0 | 1 | 0 | 0 | 1 | 0 | 0 | 1 | 5 |
| <u>NPM1</u>    | 0 | 1 | 0 | 1 | 1 | 1 | 1 | 0 | 0 | 0 | 5 |
| <u>NRF1</u>    | 1 | 1 | 0 | 1 | 0 | 0 | 1 | 0 | 0 | 1 | 5 |
| <u>ATP2B1</u>  | 1 | 1 | 0 | 1 | 1 | 0 | 0 | 0 | 0 | 1 | 5 |
| <u>NSF</u>     | 1 | 1 | 0 | 1 | 0 | 0 | 1 | 0 | 0 | 1 | 5 |
| <u>ATP2B2</u>  | 1 | 0 | 0 | 1 | 1 | 1 | 0 | 0 | 0 | 1 | 5 |
| <u>ATP2B3</u>  | 1 | 1 | 0 | 1 | 0 | 0 | 1 | 0 | 0 | 1 | 5 |
| <u>OPRK1</u>   | 1 | 1 | 0 | 1 | 0 | 0 | 1 | 0 | 0 | 1 | 5 |
| <u>PEBP1</u>   | 1 | 1 | 0 | 1 | 0 | 0 | 1 | 0 | 0 | 1 | 5 |
| <u>RRM2B</u>   | 1 | 1 | 0 | 1 | 0 | 0 | 1 | 0 | 0 | 1 | 5 |
| <u>PAM</u>     | 1 | 0 | 0 | 1 | 1 | 1 | 0 | 0 | 0 | 1 | 5 |
| <u>PAM</u>     | 1 | 0 | 0 | 1 | 1 | 1 | 0 | 0 | 0 | 1 | 5 |
| <u>PARN</u>    | 1 | 1 | 0 | 1 | 0 | 0 | 1 | 0 | 0 | 1 | 5 |
| <u>PAX5</u>    | 1 | 1 | 0 | 1 | 0 | 0 | 1 | 0 | 0 | 1 | 5 |
| <u>SPOCK3</u>  | 1 | 1 | 0 | 1 | 0 | 0 | 1 | 0 | 0 | 1 | 5 |
| <u>RNF141</u>  | 1 | 1 | 0 | 1 | 0 | 0 | 1 | 0 | 0 | 1 | 5 |
| <u>PCBP1</u>   | 1 | 1 | 0 | 1 | 1 | 0 | 1 | 0 | 0 | 0 | 5 |
| <u>PDE11A</u>  | 1 | 1 | 0 | 1 | 0 | 0 | 1 | 0 | 0 | 1 | 5 |
| <u>ACOX1</u>   | 1 | 1 | 0 | 1 | 0 | 0 | 1 | 0 | 0 | 1 | 5 |
| <u>SLC35C2</u> | 1 | 0 | 1 | 1 | 0 | 0 | 1 | 0 | 0 | 1 | 5 |
| <u>ASCC1</u>   | 1 | 1 | 0 | 1 | 0 | 0 | 1 | 0 | 0 | 1 | 5 |
| <u>EXOSC3</u>  | 1 | 1 | 0 | 1 | 0 | 0 | 1 | 0 | 0 | 1 | 5 |
| <u>TMED7</u>   | 1 | 1 | 0 | 1 | 0 | 0 | 1 | 0 | 0 | 1 | 5 |
| <u>VPS36</u>   | 1 | 1 | 0 | 1 | 0 | 0 | 1 | 0 | 0 | 1 | 5 |
| <u>FAM152A</u> | 1 | 1 | 0 | 1 | 0 | 0 | 1 | 0 | 0 | 1 | 5 |
| <u>ST8SIA3</u> | 1 | 1 | 0 | 1 | 0 | 0 | 1 | 0 | 0 | 1 | 5 |
| <u>FAM135B</u> | 1 | 1 | 0 | 1 | 0 | 0 | 1 | 0 | 0 | 1 | 5 |
| <u>TXNDC12</u> | 1 | 1 | 0 | 1 | 0 | 0 | 1 | 0 | 0 | 1 | 5 |
| <u>SH3GLB1</u> | 1 | 1 | 0 | 1 | 0 | 0 | 1 | 0 | 0 | 1 | 5 |

|                 |   |   |   |   |   |   |   |   |   |   |   |
|-----------------|---|---|---|---|---|---|---|---|---|---|---|
| <u>METTL9</u>   | 1 | 1 | 0 | 1 | 0 | 0 | 1 | 1 | 0 | 0 | 5 |
| <u>GOLGA7</u>   | 1 | 0 | 0 | 1 | 0 | 0 | 1 | 0 | 1 | 1 | 5 |
| <u>ASB3</u>     | 1 | 0 | 0 | 1 | 0 | 0 | 1 | 1 | 0 | 1 | 5 |
| <u>MYO15A</u>   | 1 | 1 | 0 | 1 | 0 | 0 | 1 | 0 | 0 | 1 | 5 |
| <u>VRK3</u>     | 1 | 1 | 0 | 1 | 0 | 0 | 1 | 0 | 0 | 1 | 5 |
| <u>PDZD11</u>   | 1 | 1 | 0 | 1 | 0 | 0 | 1 | 0 | 0 | 1 | 5 |
| <u>KLF3</u>     | 0 | 1 | 1 | 1 | 0 | 0 | 1 | 0 | 0 | 1 | 5 |
| <u>ZNF571</u>   | 1 | 1 | 0 | 1 | 0 | 0 | 1 | 0 | 0 | 1 | 5 |
| <u>RBJ</u>      | 1 | 1 | 0 | 1 | 0 | 0 | 1 | 0 | 0 | 1 | 5 |
| <u>C1RL</u>     | 1 | 1 | 0 | 1 | 0 | 0 | 1 | 0 | 0 | 1 | 5 |
| <u>CRNKL1</u>   | 1 | 1 | 0 | 1 | 0 | 0 | 1 | 0 | 0 | 1 | 5 |
| <u>KLRF1</u>    | 1 | 1 | 0 | 1 | 0 | 0 | 1 | 0 | 0 | 1 | 5 |
| <u>CRLF3</u>    | 1 | 1 | 0 | 1 | 0 | 0 | 1 | 0 | 0 | 1 | 5 |
| <u>PDE2A</u>    | 1 | 1 | 0 | 1 | 0 | 0 | 1 | 0 | 1 | 0 | 5 |
| <u>PDE3B</u>    | 1 | 1 | 0 | 1 | 0 | 0 | 1 | 0 | 0 | 1 | 5 |
| <u>PCYOX1</u>   | 1 | 1 | 0 | 1 | 0 | 0 | 1 | 0 | 0 | 1 | 5 |
| <u>ANKFY1</u>   | 1 | 1 | 0 | 1 | 0 | 0 | 1 | 0 | 0 | 1 | 5 |
| <u>C22orf28</u> | 1 | 1 | 0 | 1 | 0 | 0 | 1 | 0 | 0 | 1 | 5 |
| <u>GTSE1</u>    | 1 | 1 | 0 | 1 | 0 | 0 | 1 | 0 | 0 | 1 | 5 |
| <u>PCF11</u>    | 1 | 1 | 0 | 1 | 1 | 0 | 1 | 0 | 0 | 0 | 5 |
| <u>TRIM33</u>   | 1 | 1 | 0 | 1 | 0 | 0 | 1 | 0 | 0 | 1 | 5 |
| <u>TAF9B</u>    | 1 | 1 | 0 | 1 | 1 | 0 | 0 | 0 | 0 | 1 | 5 |
| <u>ASB1</u>     | 1 | 1 | 0 | 1 | 0 | 0 | 1 | 0 | 0 | 1 | 5 |
| <u>SUFU</u>     | 1 | 1 | 0 | 1 | 0 | 0 | 1 | 0 | 0 | 1 | 5 |
| <u>PDPK1</u>    | 1 | 1 | 0 | 1 | 0 | 0 | 1 | 0 | 0 | 1 | 5 |
| <u>ZNF44</u>    | 1 | 0 | 1 | 1 | 0 | 0 | 1 | 0 | 0 | 1 | 5 |
| <u>CAB39</u>    | 1 | 1 | 0 | 1 | 1 | 1 | 0 | 0 | 0 | 0 | 5 |
| <u>CMPK1</u>    | 1 | 1 | 0 | 1 | 0 | 0 | 1 | 0 | 0 | 1 | 5 |
| <u>POLR3K</u>   | 1 | 1 | 0 | 1 | 0 | 0 | 1 | 0 | 0 | 1 | 5 |
| <u>UPB1</u>     | 1 | 1 | 0 | 1 | 0 | 0 | 1 | 0 | 0 | 1 | 5 |
| <u>RAB8B</u>    | 1 | 1 | 0 | 1 | 0 | 0 | 1 | 0 | 0 | 1 | 5 |
| <u>ZAK</u>      | 1 | 0 | 0 | 1 | 0 | 0 | 1 | 1 | 0 | 1 | 5 |
| <u>SIX4</u>     | 1 | 1 | 0 | 1 | 0 | 0 | 1 | 0 | 0 | 1 | 5 |
| <u>PF4V1</u>    | 1 | 1 | 0 | 1 | 0 | 0 | 1 | 0 | 0 | 1 | 5 |
| <u>ATP8B1</u>   | 1 | 1 | 0 | 1 | 0 | 0 | 1 | 0 | 0 | 1 | 5 |
| <u>PFTK1</u>    | 1 | 1 | 0 | 1 | 1 | 0 | 1 | 0 | 0 | 0 | 5 |
| <u>ATP6V1A</u>  | 1 | 1 | 0 | 1 | 0 | 0 | 1 | 0 | 0 | 1 | 5 |
| <u>SERPIN9</u>  | 1 | 1 | 0 | 1 | 0 | 0 | 1 | 0 | 0 | 1 | 5 |
| <u>PIK3C2A</u>  | 0 | 1 | 1 | 1 | 0 | 0 | 1 | 0 | 0 | 1 | 5 |
| <u>PIN4</u>     | 1 | 1 | 0 | 1 | 0 | 0 | 1 | 0 | 0 | 1 | 5 |
| <u>PKD2</u>     | 1 | 1 | 0 | 1 | 0 | 0 | 1 | 0 | 0 | 1 | 5 |

|                 |   |   |   |   |   |   |   |   |   |   |   |
|-----------------|---|---|---|---|---|---|---|---|---|---|---|
| <u>PKP2</u>     | 1 | 0 | 1 | 1 | 0 | 0 | 1 | 0 | 0 | 1 | 5 |
| <u>CHIC1</u>    | 1 | 1 | 0 | 1 | 0 | 0 | 1 | 0 | 0 | 1 | 5 |
| <u>PANK1</u>    | 1 | 1 | 0 | 1 | 0 | 0 | 1 | 0 | 0 | 1 | 5 |
| <u>PLEK</u>     | 1 | 1 | 0 | 1 | 0 | 0 | 1 | 0 | 0 | 1 | 5 |
| <u>PML</u>      | 1 | 1 | 0 | 1 | 0 | 0 | 1 | 0 | 0 | 1 | 5 |
| <u>ATP7B</u>    | 1 | 1 | 0 | 1 | 0 | 0 | 1 | 0 | 0 | 1 | 5 |
| <u>FAM3B</u>    | 1 | 1 | 0 | 1 | 0 | 0 | 1 | 0 | 0 | 1 | 5 |
| <u>GNG2</u>     | 1 | 1 | 0 | 1 | 0 | 0 | 1 | 0 | 0 | 1 | 5 |
| <u>GDAP1</u>    | 1 | 1 | 0 | 1 | 0 | 0 | 1 | 0 | 0 | 1 | 5 |
| <u>POLR2K</u>   | 1 | 1 | 0 | 1 | 0 | 0 | 1 | 0 | 0 | 1 | 5 |
| <u>POMC</u>     | 1 | 0 | 1 | 1 | 0 | 0 | 1 | 0 | 0 | 1 | 5 |
| <u>XRN1</u>     | 1 | 0 | 1 | 1 | 0 | 0 | 1 | 0 | 0 | 1 | 5 |
| <u>TXNDC10</u>  | 1 | 1 | 0 | 1 | 0 | 0 | 1 | 0 | 0 | 1 | 5 |
| <u>RBM47</u>    | 1 | 0 | 0 | 1 | 1 | 1 | 0 | 0 | 0 | 1 | 5 |
| <u>POU3F2</u>   | 1 | 1 | 0 | 1 | 0 | 0 | 1 | 0 | 0 | 1 | 5 |
| <u>CCNJ</u>     | 1 | 0 | 0 | 1 | 1 | 1 | 0 | 0 | 0 | 1 | 5 |
| <u>KIAA1383</u> | 1 | 1 | 0 | 1 | 0 | 0 | 1 | 0 | 0 | 1 | 5 |
| <u>PPARA</u>    | 1 | 0 | 1 | 1 | 0 | 0 | 1 | 0 | 0 | 1 | 5 |
| <u>TBC1D13</u>  | 1 | 1 | 0 | 1 | 0 | 0 | 1 | 0 | 0 | 1 | 5 |
| <u>TMEM106B</u> | 1 | 0 | 1 | 1 | 0 | 0 | 1 | 0 | 0 | 1 | 5 |
| <u>MARCH5</u>   | 1 | 1 | 0 | 1 | 0 | 0 | 1 | 0 | 0 | 1 | 5 |
| <u>EPDR1</u>    | 1 | 1 | 0 | 1 | 0 | 0 | 1 | 0 | 0 | 1 | 5 |
| <u>BNC2</u>     | 1 | 1 | 0 | 1 | 0 | 0 | 1 | 0 | 0 | 1 | 5 |
| <u>KLHL24</u>   | 1 | 1 | 0 | 1 | 0 | 0 | 1 | 0 | 0 | 1 | 5 |
| <u>AFTPH</u>    | 1 | 0 | 0 | 1 | 1 | 1 | 0 | 0 | 0 | 1 | 5 |
| <u>BSPRY</u>    | 1 | 1 | 0 | 1 | 0 | 0 | 1 | 0 | 0 | 1 | 5 |
| <u>RBM35A</u>   | 1 | 1 | 0 | 1 | 0 | 0 | 0 | 0 | 1 | 1 | 5 |
| <u>FAM46C</u>   | 1 | 1 | 0 | 1 | 0 | 0 | 1 | 0 | 0 | 1 | 5 |
| <u>PGPEP1</u>   | 1 | 1 | 0 | 1 | 0 | 0 | 1 | 0 | 0 | 1 | 5 |
| <u>C9orf167</u> | 1 | 1 | 0 | 1 | 0 | 0 | 1 | 0 | 0 | 1 | 5 |
| <u>C4orf30</u>  | 1 | 1 | 0 | 1 | 0 | 0 | 1 | 0 | 0 | 1 | 5 |
| <u>ZCCHC2</u>   | 1 | 1 | 0 | 1 | 0 | 0 | 1 | 0 | 0 | 1 | 5 |
| <u>UHRF1BP1</u> | 1 | 1 | 0 | 1 | 0 | 0 | 1 | 0 | 0 | 1 | 5 |
| <u>FLJ20309</u> | 0 | 1 | 1 | 1 | 0 | 0 | 1 | 0 | 0 | 1 | 5 |
| <u>RNF43</u>    | 1 | 1 | 0 | 1 | 0 | 0 | 1 | 0 | 0 | 1 | 5 |
| <u>ELOVL2</u>   | 1 | 1 | 0 | 1 | 0 | 0 | 1 | 0 | 0 | 1 | 5 |
| <u>CMTM6</u>    | 1 | 1 | 0 | 1 | 0 | 0 | 1 | 0 | 0 | 1 | 5 |
| <u>PPL</u>      | 1 | 1 | 0 | 1 | 0 | 0 | 1 | 0 | 1 | 0 | 5 |
| <u>OCIAD1</u>   | 1 | 0 | 1 | 1 | 0 | 0 | 1 | 0 | 0 | 1 | 5 |
| <u>RNF125</u>   | 1 | 1 | 0 | 1 | 0 | 0 | 1 | 0 | 0 | 1 | 5 |
| <u>TRSPAP1</u>  | 1 | 1 | 0 | 1 | 0 | 0 | 1 | 0 | 0 | 1 | 5 |

|                  |   |   |   |   |   |   |   |   |   |   |   |
|------------------|---|---|---|---|---|---|---|---|---|---|---|
| <u>C1orf27</u>   | 1 | 1 | 0 | 1 | 0 | 0 | 1 | 0 | 0 | 1 | 5 |
| <u>FAM120C</u>   | 1 | 1 | 0 | 1 | 0 | 0 | 1 | 0 | 0 | 1 | 5 |
| <u>SLC25A38</u>  | 1 | 1 | 0 | 1 | 0 | 0 | 1 | 0 | 0 | 1 | 5 |
| <u>C2orf42</u>   | 1 | 1 | 0 | 1 | 0 | 0 | 1 | 0 | 1 | 0 | 5 |
| <u>TMCO3</u>     | 1 | 1 | 0 | 1 | 0 | 0 | 1 | 0 | 0 | 1 | 5 |
| <u>FLJ20699</u>  | 1 | 1 | 0 | 1 | 0 | 0 | 1 | 0 | 0 | 1 | 5 |
| <u>PHIP</u>      | 1 | 1 | 0 | 1 | 1 | 0 | 1 | 0 | 0 | 0 | 5 |
| <u>BANK1</u>     | 1 | 1 | 0 | 1 | 0 | 0 | 1 | 0 | 0 | 1 | 5 |
| <u>USP47</u>     | 1 | 1 | 0 | 1 | 0 | 0 | 1 | 0 | 0 | 1 | 5 |
| <u>NOL8</u>      | 1 | 1 | 0 | 1 | 0 | 0 | 1 | 0 | 0 | 1 | 5 |
| <u>CDCA4</u>     | 1 | 1 | 0 | 1 | 0 | 0 | 1 | 0 | 0 | 1 | 5 |
| <u>TMEM45A</u>   | 1 | 1 | 0 | 1 | 0 | 0 | 1 | 0 | 0 | 1 | 5 |
| <u>IFT57</u>     | 1 | 1 | 0 | 1 | 0 | 0 | 1 | 0 | 0 | 1 | 5 |
| <u>C10orf118</u> | 1 | 1 | 0 | 1 | 0 | 0 | 1 | 0 | 0 | 1 | 5 |
| <u>ATG2B</u>     | 1 | 1 | 0 | 1 | 0 | 0 | 1 | 0 | 0 | 1 | 5 |
| <u>AGGF1</u>     | 1 | 1 | 0 | 1 | 0 | 0 | 1 | 0 | 0 | 1 | 5 |
| <u>LRRC8D</u>    | 1 | 1 | 0 | 1 | 1 | 0 | 0 | 0 | 0 | 1 | 5 |
| <u>THAP1</u>     | 1 | 1 | 0 | 1 | 0 | 0 | 1 | 0 | 0 | 1 | 5 |
| <u>C12orf35</u>  | 1 | 1 | 0 | 1 | 0 | 0 | 1 | 0 | 0 | 1 | 5 |
| <u>P15RS</u>     | 1 | 1 | 0 | 1 | 0 | 0 | 1 | 0 | 0 | 1 | 5 |
| <u>APPL2</u>     | 1 | 1 | 0 | 1 | 0 | 0 | 1 | 0 | 0 | 1 | 5 |
| <u>PPP2R3A</u>   | 1 | 1 | 0 | 1 | 0 | 0 | 1 | 0 | 0 | 1 | 5 |
| <u>UBA6</u>      | 1 | 1 | 0 | 1 | 0 | 0 | 1 | 0 | 0 | 1 | 5 |
| <u>TMEM19</u>    | 1 | 1 | 0 | 1 | 0 | 0 | 1 | 0 | 0 | 1 | 5 |
| <u>UBE2W</u>     | 1 | 1 | 0 | 1 | 0 | 0 | 1 | 0 | 0 | 1 | 5 |
| <u>TMEM40</u>    | 1 | 1 | 0 | 1 | 0 | 0 | 1 | 0 | 0 | 1 | 5 |
| <u>SPTLC3</u>    | 1 | 1 | 0 | 1 | 0 | 0 | 1 | 0 | 0 | 1 | 5 |
| <u>PEF1</u>      | 1 | 1 | 0 | 1 | 0 | 0 | 1 | 0 | 0 | 1 | 5 |
| <u>RFK</u>       | 1 | 1 | 0 | 1 | 0 | 0 | 1 | 0 | 0 | 1 | 5 |
| <u>TMEM144</u>   | 1 | 1 | 0 | 1 | 0 | 0 | 1 | 0 | 0 | 1 | 5 |
| <u>FLJ11184</u>  | 1 | 1 | 0 | 1 | 0 | 0 | 1 | 0 | 0 | 1 | 5 |
| <u>AGPAT5</u>    | 1 | 1 | 0 | 1 | 0 | 0 | 1 | 0 | 0 | 1 | 5 |
| <u>C10orf59</u>  | 1 | 1 | 0 | 1 | 0 | 0 | 1 | 0 | 0 | 1 | 5 |
| <u>PHCA</u>      | 1 | 1 | 0 | 1 | 0 | 0 | 1 | 0 | 0 | 1 | 5 |
| <u>DRAM</u>      | 1 | 1 | 0 | 1 | 0 | 0 | 1 | 0 | 0 | 1 | 5 |
| <u>WDR33</u>     | 1 | 1 | 0 | 1 | 0 | 0 | 1 | 0 | 0 | 1 | 5 |
| <u>P14K2A</u>    | 0 | 1 | 0 | 1 | 1 | 0 | 1 | 0 | 0 | 1 | 5 |
| <u>HEMGN</u>     | 1 | 0 | 1 | 1 | 0 | 0 | 1 | 0 | 0 | 1 | 5 |
| <u>MCM10</u>     | 1 | 1 | 0 | 1 | 0 | 0 | 1 | 0 | 0 | 1 | 5 |
| <u>YOD1</u>      | 1 | 1 | 0 | 1 | 0 | 0 | 1 | 0 | 0 | 1 | 5 |
| <u>TNFRSF19</u>  | 1 | 1 | 0 | 1 | 0 | 0 | 1 | 0 | 0 | 1 | 5 |

|                 |   |   |   |   |   |   |   |   |   |   |   |
|-----------------|---|---|---|---|---|---|---|---|---|---|---|
| <u>ELAC1</u>    | 1 | 1 | 0 | 1 | 0 | 0 | 1 | 0 | 0 | 1 | 5 |
| <u>SOX6</u>     | 1 | 0 | 1 | 1 | 0 | 0 | 1 | 0 | 0 | 1 | 5 |
| <u>SOX6</u>     | 1 | 0 | 0 | 1 | 1 | 1 | 0 | 0 | 0 | 1 | 5 |
| <u>GALNT10</u>  | 1 | 1 | 0 | 1 | 0 | 0 | 1 | 0 | 0 | 1 | 5 |
| <u>C2orf29</u>  | 1 | 1 | 0 | 1 | 0 | 0 | 1 | 0 | 0 | 1 | 5 |
| <u>CHRNA9</u>   | 1 | 1 | 0 | 1 | 0 | 0 | 1 | 0 | 0 | 1 | 5 |
| <u>ITLN1</u>    | 1 | 1 | 0 | 1 | 0 | 0 | 1 | 1 | 0 | 0 | 5 |
| <u>PPP1R9A</u>  | 1 | 0 | 1 | 1 | 0 | 0 | 1 | 0 | 0 | 1 | 5 |
| <u>FERMT1</u>   | 1 | 1 | 0 | 1 | 0 | 0 | 1 | 0 | 0 | 1 | 5 |
| <u>THUMPD1</u>  | 1 | 1 | 0 | 1 | 0 | 0 | 1 | 0 | 0 | 1 | 5 |
| <u>ZDHHC7</u>   | 1 | 0 | 0 | 1 | 1 | 0 | 1 | 0 | 0 | 1 | 5 |
| <u>TBC1D22B</u> | 1 | 1 | 0 | 1 | 0 | 0 | 1 | 0 | 0 | 1 | 5 |
| <u>ZNF673</u>   | 1 | 1 | 1 | 1 | 0 | 0 | 0 | 0 | 0 | 1 | 5 |
| <u>RAB20</u>    | 1 | 1 | 0 | 1 | 0 | 0 | 1 | 1 | 0 | 0 | 5 |
| <u>TMEM127</u>  | 1 | 1 | 0 | 1 | 0 | 0 | 1 | 0 | 0 | 1 | 5 |
| <u>DENND4C</u>  | 1 | 1 | 0 | 1 | 0 | 0 | 1 | 0 | 0 | 1 | 5 |
| <u>C10orf6</u>  | 1 | 1 | 0 | 1 | 0 | 0 | 1 | 0 | 0 | 1 | 5 |
| <u>ENAH</u>     | 1 | 1 | 0 | 1 | 0 | 0 | 1 | 0 | 0 | 1 | 5 |
| <u>SEPT11</u>   | 1 | 1 | 0 | 1 | 0 | 0 | 1 | 0 | 0 | 1 | 5 |
| <u>TMEM30A</u>  | 1 | 1 | 0 | 1 | 0 | 0 | 1 | 0 | 0 | 1 | 5 |
| <u>ZNF701</u>   | 1 | 1 | 0 | 1 | 0 | 0 | 1 | 0 | 0 | 1 | 5 |
| <u>H2AFJ</u>    | 1 | 1 | 0 | 1 | 0 | 0 | 1 | 0 | 0 | 1 | 5 |
| <u>SCN3B</u>    | 1 | 1 | 0 | 1 | 0 | 0 | 1 | 0 | 0 | 1 | 5 |
| <u>DCP1A</u>    | 1 | 1 | 0 | 1 | 0 | 0 | 1 | 0 | 0 | 1 | 5 |
| <u>LRP2BP</u>   | 1 | 1 | 0 | 1 | 0 | 0 | 1 | 0 | 0 | 1 | 5 |
| <u>ACTR10</u>   | 1 | 1 | 0 | 1 | 0 | 0 | 1 | 0 | 0 | 1 | 5 |
| <u>LANCL2</u>   | 1 | 1 | 0 | 1 | 0 | 0 | 1 | 0 | 0 | 1 | 5 |
| <u>PRKG1</u>    | 1 | 1 | 0 | 1 | 0 | 0 | 1 | 0 | 0 | 1 | 5 |
| <u>SEPT3</u>    | 1 | 0 | 0 | 1 | 1 | 0 | 1 | 0 | 0 | 1 | 5 |
| <u>SEPT3</u>    | 1 | 1 | 0 | 1 | 1 | 0 | 0 | 0 | 0 | 1 | 5 |
| <u>SLC25A40</u> | 1 | 1 | 0 | 1 | 0 | 0 | 1 | 1 | 0 | 0 | 5 |
| <u>PRKX</u>     | 1 | 1 | 0 | 1 | 0 | 0 | 1 | 0 | 0 | 1 | 5 |
| <u>PCDHB6</u>   | 1 | 1 | 0 | 1 | 0 | 0 | 1 | 0 | 0 | 1 | 5 |
| <u>PCDHB3</u>   | 1 | 1 | 0 | 1 | 0 | 0 | 1 | 0 | 0 | 1 | 5 |
| <u>PCDHA10</u>  | 0 | 1 | 0 | 1 | 1 | 1 | 0 | 0 | 0 | 1 | 5 |
| <u>ANKH</u>     | 1 | 1 | 0 | 1 | 0 | 0 | 1 | 0 | 0 | 1 | 5 |
| <u>ZNF253</u>   | 1 | 1 | 0 | 1 | 0 | 0 | 1 | 0 | 0 | 1 | 5 |
| <u>YLPM1</u>    | 0 | 1 | 1 | 1 | 0 | 0 | 1 | 0 | 0 | 1 | 5 |
| <u>RNF20</u>    | 1 | 1 | 0 | 1 | 0 | 0 | 1 | 0 | 0 | 1 | 5 |
| <u>WDR45L</u>   | 1 | 1 | 0 | 1 | 0 | 0 | 1 | 0 | 0 | 1 | 5 |
| <u>PROX1</u>    | 1 | 1 | 0 | 1 | 0 | 0 | 1 | 0 | 0 | 1 | 5 |



|                 |   |   |   |   |   |   |   |   |   |   |   |
|-----------------|---|---|---|---|---|---|---|---|---|---|---|
| <u>PRMT8</u>    | 1 | 1 | 0 | 1 | 0 | 0 | 1 | 0 | 0 | 1 | 5 |
| <u>PSAP</u>     | 1 | 1 | 0 | 1 | 1 | 0 | 0 | 0 | 0 | 1 | 5 |
| <u>CYP26B1</u>  | 1 | 1 | 0 | 1 | 0 | 0 | 1 | 0 | 0 | 1 | 5 |
| <u>TRIM39</u>   | 1 | 1 | 0 | 1 | 1 | 0 | 0 | 0 | 0 | 1 | 5 |
| <u>MUC13</u>    | 1 | 1 | 0 | 1 | 0 | 0 | 1 | 0 | 0 | 1 | 5 |
| <u>PSG3</u>     | 0 | 1 | 1 | 1 | 0 | 0 | 1 | 0 | 0 | 1 | 5 |
| <u>ZC3HAV1</u>  | 1 | 1 | 0 | 1 | 0 | 0 | 1 | 0 | 0 | 1 | 5 |
| <u>AGPAT3</u>   | 1 | 1 | 0 | 1 | 0 | 0 | 1 | 0 | 0 | 1 | 5 |
| <u>AGPAT4</u>   | 1 | 1 | 0 | 1 | 0 | 0 | 1 | 0 | 0 | 1 | 5 |
| <u>SPIRE1</u>   | 1 | 1 | 1 | 1 | 0 | 0 | 0 | 0 | 0 | 1 | 5 |
| <u>DHX33</u>    | 1 | 1 | 0 | 1 | 0 | 0 | 1 | 0 | 0 | 1 | 5 |
| <u>C11orf75</u> | 1 | 1 | 0 | 1 | 0 | 0 | 1 | 0 | 0 | 1 | 5 |
| <u>C11orf30</u> | 1 | 1 | 0 | 1 | 0 | 0 | 1 | 0 | 0 | 1 | 5 |
| <u>ACN9</u>     | 1 | 1 | 0 | 1 | 0 | 0 | 1 | 0 | 0 | 1 | 5 |
| <u>C12orf5</u>  | 1 | 1 | 0 | 1 | 0 | 0 | 1 | 0 | 0 | 1 | 5 |
| <u>PHTF2</u>    | 1 | 1 | 1 | 1 | 0 | 0 | 0 | 0 | 0 | 1 | 5 |
| <u>SLC39A10</u> | 1 | 1 | 0 | 1 | 0 | 0 | 0 | 1 | 0 | 1 | 5 |
| <u>KIAA1199</u> | 1 | 1 | 0 | 1 | 0 | 0 | 1 | 0 | 0 | 1 | 5 |
| <u>PTEN</u>     | 1 | 1 | 0 | 1 | 0 | 0 | 1 | 0 | 0 | 1 | 5 |
| <u>SENP7</u>    | 1 | 1 | 0 | 1 | 1 | 0 | 1 | 0 | 0 | 0 | 5 |
| <u>AICDA</u>    | 1 | 1 | 0 | 1 | 0 | 0 | 1 | 0 | 0 | 1 | 5 |
| <u>PTGIS</u>    | 1 | 1 | 0 | 1 | 0 | 0 | 1 | 0 | 0 | 1 | 5 |
| <u>C3orf14</u>  | 1 | 1 | 0 | 1 | 0 | 0 | 1 | 0 | 0 | 1 | 5 |
| <u>SLC24A3</u>  | 1 | 1 | 0 | 1 | 0 | 0 | 1 | 0 | 0 | 1 | 5 |
| <u>NDRG3</u>    | 1 | 1 | 0 | 1 | 0 | 0 | 1 | 0 | 0 | 1 | 5 |
| <u>GALNTL1</u>  | 1 | 1 | 0 | 1 | 0 | 0 | 1 | 0 | 0 | 1 | 5 |
| <u>FAM40B</u>   | 1 | 1 | 0 | 1 | 0 | 0 | 1 | 0 | 0 | 1 | 5 |
| <u>CNOT6</u>    | 1 | 1 | 0 | 1 | 0 | 0 | 1 | 0 | 0 | 1 | 5 |
| <u>USP31</u>    | 0 | 1 | 1 | 1 | 0 | 0 | 1 | 0 | 0 | 1 | 5 |
| <u>KIAA1211</u> | 1 | 1 | 0 | 1 | 0 | 0 | 1 | 0 | 0 | 1 | 5 |
| <u>COG6</u>     | 1 | 1 | 0 | 1 | 0 | 0 | 1 | 0 | 0 | 1 | 5 |
| <u>HECW2</u>    | 1 | 1 | 0 | 1 | 0 | 0 | 1 | 0 | 0 | 1 | 5 |
| <u>CASKIN1</u>  | 1 | 1 | 0 | 1 | 0 | 0 | 1 | 0 | 0 | 1 | 5 |
| <u>CGN</u>      | 1 | 1 | 0 | 1 | 0 | 0 | 1 | 0 | 0 | 1 | 5 |
| <u>NUFIP2</u>   | 0 | 1 | 1 | 1 | 0 | 0 | 1 | 0 | 0 | 1 | 5 |
| <u>ARHGAP20</u> | 1 | 1 | 0 | 1 | 0 | 0 | 1 | 0 | 0 | 1 | 5 |
| <u>TRMT5</u>    | 1 | 1 | 0 | 1 | 0 | 0 | 1 | 0 | 0 | 1 | 5 |
| <u>KIAA1407</u> | 1 | 1 | 0 | 1 | 0 | 0 | 1 | 0 | 0 | 1 | 5 |
| <u>DIP2B</u>    | 1 | 1 | 0 | 1 | 0 | 0 | 1 | 0 | 0 | 1 | 5 |
| <u>KIAA1467</u> | 1 | 1 | 0 | 1 | 0 | 0 | 1 | 0 | 0 | 1 | 5 |
| <u>SHROOM3</u>  | 1 | 1 | 0 | 1 | 0 | 0 | 1 | 0 | 0 | 1 | 5 |

|          |   |   |   |   |   |   |   |   |   |   |   |
|----------|---|---|---|---|---|---|---|---|---|---|---|
| ZBTB2    | 1 | 1 | 0 | 1 | 0 | 0 | 1 | 0 | 0 | 1 | 5 |
| ZFAT     | 1 | 1 | 0 | 1 | 0 | 0 | 1 | 0 | 0 | 1 | 5 |
| KIAA1486 | 1 | 1 | 0 | 1 | 0 | 0 | 1 | 0 | 0 | 1 | 5 |
| DPP10    | 1 | 1 | 0 | 1 | 1 | 0 | 0 | 0 | 0 | 1 | 5 |
| DPP10    | 1 | 0 | 0 | 1 | 1 | 0 | 1 | 0 | 0 | 1 | 5 |
| GPAM     | 1 | 1 | 0 | 1 | 0 | 0 | 1 | 0 | 0 | 1 | 5 |
| ALS2     | 1 | 1 | 0 | 1 | 1 | 0 | 1 | 0 | 0 | 0 | 5 |
| CACHD1   | 1 | 1 | 0 | 1 | 0 | 0 | 1 | 0 | 1 | 0 | 5 |
| KIAA1576 | 1 | 1 | 0 | 1 | 0 | 0 | 1 | 0 | 0 | 1 | 5 |
| USP37    | 1 | 1 | 0 | 1 | 0 | 0 | 1 | 0 | 0 | 1 | 5 |
| DDX55    | 1 | 1 | 0 | 1 | 0 | 0 | 1 | 0 | 0 | 1 | 5 |
| FANCM    | 1 | 1 | 0 | 1 | 0 | 0 | 1 | 0 | 0 | 1 | 5 |
| DENND1A  | 1 | 1 | 0 | 1 | 0 | 0 | 1 | 0 | 0 | 1 | 5 |
| KIAA1609 | 1 | 1 | 0 | 1 | 0 | 0 | 1 | 0 | 0 | 1 | 5 |
| KIAA1632 | 1 | 1 | 0 | 1 | 0 | 0 | 1 | 0 | 0 | 1 | 5 |
| PTPN3    | 1 | 1 | 0 | 1 | 0 | 0 | 1 | 0 | 0 | 1 | 5 |
| RBAK     | 1 | 1 | 0 | 1 | 0 | 0 | 1 | 0 | 0 | 1 | 5 |
| SLAMF7   | 1 | 1 | 0 | 1 | 0 | 0 | 1 | 0 | 0 | 1 | 5 |
| PTPRC    | 1 | 1 | 0 | 1 | 0 | 0 | 1 | 0 | 0 | 1 | 5 |
| NKX3-2   | 1 | 1 | 0 | 1 | 0 | 0 | 1 | 0 | 0 | 1 | 5 |
| PTPRE    | 1 | 1 | 0 | 1 | 0 | 0 | 1 | 0 | 0 | 1 | 5 |
| PURB     | 0 | 1 | 0 | 1 | 1 | 0 | 1 | 0 | 0 | 1 | 5 |
| CREBZF   | 0 | 1 | 1 | 1 | 0 | 0 | 1 | 0 | 0 | 1 | 5 |
| FAM108C1 | 1 | 1 | 0 | 1 | 0 | 0 | 1 | 0 | 0 | 1 | 5 |
| C2orf77  | 1 | 1 | 0 | 1 | 0 | 0 | 1 | 0 | 0 | 1 | 5 |
| RAD23B   | 1 | 1 | 0 | 1 | 0 | 0 | 1 | 0 | 0 | 1 | 5 |
| RAG1     | 1 | 1 | 0 | 1 | 0 | 0 | 1 | 1 | 0 | 0 | 5 |
| RALA     | 1 | 1 | 0 | 1 | 0 | 0 | 1 | 0 | 0 | 1 | 5 |
| PLEKHA1  | 1 | 1 | 0 | 1 | 0 | 0 | 1 | 0 | 0 | 1 | 5 |
| BCL2     | 1 | 1 | 0 | 1 | 0 | 0 | 1 | 0 | 0 | 1 | 5 |
| RFC3     | 1 | 1 | 0 | 1 | 0 | 0 | 1 | 0 | 0 | 1 | 5 |
| RFX2     | 1 | 1 | 0 | 1 | 0 | 0 | 1 | 0 | 0 | 1 | 5 |
| RGS16    | 1 | 1 | 0 | 1 | 0 | 0 | 1 | 0 | 0 | 1 | 5 |
| RNASEL   | 1 | 1 | 0 | 1 | 0 | 0 | 1 | 0 | 0 | 1 | 5 |
| RNF6     | 1 | 0 | 1 | 1 | 0 | 0 | 1 | 0 | 0 | 1 | 5 |
| C2orf43  | 1 | 1 | 0 | 1 | 0 | 0 | 1 | 0 | 0 | 1 | 5 |
| DHX35    | 1 | 1 | 0 | 1 | 0 | 0 | 1 | 1 | 0 | 0 | 5 |
| HCN2     | 1 | 1 | 0 | 1 | 0 | 0 | 1 | 0 | 0 | 1 | 5 |
| RP2      | 1 | 1 | 0 | 1 | 0 | 0 | 1 | 0 | 0 | 1 | 5 |
| RPL15    | 1 | 1 | 0 | 1 | 0 | 0 | 1 | 0 | 0 | 1 | 5 |
| RPL28    | 1 | 1 | 0 | 1 | 0 | 0 | 1 | 0 | 0 | 1 | 5 |

|                      |   |   |   |   |   |   |   |   |   |   |   |
|----------------------|---|---|---|---|---|---|---|---|---|---|---|
| <u>RPN2</u>          | 1 | 1 | 0 | 1 | 0 | 0 | 1 | 0 | 0 | 1 | 5 |
| <u>ZNF704</u>        | 1 | 1 | 0 | 1 | 0 | 0 | 1 | 0 | 0 | 1 | 5 |
| <u>SALL2</u>         | 1 | 1 | 0 | 1 | 0 | 0 | 1 | 0 | 0 | 1 | 5 |
| <u>SCN9A</u>         | 0 | 1 | 1 | 1 | 0 | 0 | 1 | 0 | 0 | 1 | 5 |
| <u>CCL8</u>          | 1 | 1 | 0 | 1 | 0 | 0 | 1 | 0 | 0 | 1 | 5 |
| <u>CCL13</u>         | 1 | 1 | 0 | 1 | 0 | 0 | 1 | 0 | 0 | 1 | 5 |
| <u>CXCL5</u>         | 1 | 1 | 0 | 1 | 0 | 0 | 1 | 0 | 0 | 1 | 5 |
| <u>SDC2</u>          | 1 | 1 | 0 | 1 | 0 | 0 | 1 | 0 | 0 | 1 | 5 |
| <u>PRDM1</u>         | 1 | 1 | 0 | 1 | 0 | 0 | 1 | 0 | 0 | 1 | 5 |
| <u>NAPB</u>          | 1 | 1 | 0 | 1 | 0 | 0 | 1 | 0 | 0 | 1 | 5 |
| <u>XPNPEP3</u>       | 1 | 1 | 0 | 1 | 0 | 0 | 1 | 0 | 0 | 1 | 5 |
| <u>MRPS14</u>        | 1 | 1 | 0 | 1 | 0 | 0 | 1 | 0 | 0 | 1 | 5 |
| <u>ZNF667</u>        | 1 | 1 | 0 | 1 | 0 | 0 | 1 | 0 | 0 | 1 | 5 |
| <u>PRDM15</u>        | 1 | 1 | 0 | 1 | 0 | 0 | 1 | 0 | 0 | 1 | 5 |
| <u>CDH23</u>         | 1 | 1 | 0 | 1 | 0 | 0 | 1 | 0 | 0 | 1 | 5 |
| <u>XYLT1</u>         | 1 | 1 | 0 | 1 | 0 | 0 | 1 | 0 | 0 | 1 | 5 |
| <u>NCAPG</u>         | 1 | 1 | 0 | 1 | 0 | 0 | 1 | 0 | 0 | 1 | 5 |
| <u>NECAB1</u>        | 1 | 1 | 0 | 1 | 0 | 0 | 1 | 0 | 0 | 1 | 5 |
| <u>SPATA1</u>        | 0 | 1 | 1 | 1 | 0 | 0 | 1 | 0 | 0 | 1 | 5 |
| <u>C14orf4</u>       | 0 | 1 | 0 | 1 | 1 | 0 | 1 | 0 | 0 | 1 | 5 |
| <u>PDLIM2</u>        | 1 | 1 | 0 | 1 | 0 | 0 | 1 | 0 | 0 | 1 | 5 |
| <u>SFRP4</u>         | 1 | 1 | 0 | 1 | 0 | 0 | 1 | 0 | 0 | 1 | 5 |
| <u>DKFZP686E2158</u> | 1 | 1 | 0 | 1 | 0 | 0 | 1 | 0 | 0 | 1 | 5 |
| <u>SOX17</u>         | 1 | 1 | 0 | 1 | 0 | 0 | 1 | 0 | 0 | 1 | 5 |
| <u>HHIP</u>          | 1 | 1 | 0 | 1 | 0 | 0 | 1 | 0 | 0 | 1 | 5 |
| <u>CENTD3</u>        | 1 | 1 | 0 | 1 | 0 | 0 | 1 | 0 | 0 | 1 | 5 |
| <u>C5orf28</u>       | 1 | 1 | 0 | 1 | 0 | 0 | 1 | 0 | 0 | 1 | 5 |
| <u>MRPS25</u>        | 1 | 1 | 0 | 1 | 0 | 0 | 1 | 0 | 0 | 1 | 5 |
| <u>NOM1</u>          | 1 | 1 | 0 | 1 | 0 | 0 | 1 | 0 | 0 | 1 | 5 |
| <u>SCG5</u>          | 1 | 0 | 0 | 1 | 0 | 0 | 1 | 0 | 1 | 1 | 5 |
| <u>C15orf56</u>      | 1 | 1 | 0 | 1 | 0 | 0 | 1 | 0 | 0 | 1 | 5 |
| <u>ITSN1</u>         | 1 | 1 | 0 | 1 | 0 | 0 | 1 | 0 | 0 | 1 | 5 |
| <u>GIGYF1</u>        | 1 | 1 | 0 | 1 | 0 | 0 | 1 | 0 | 0 | 1 | 5 |
| <u>SHB</u>           | 1 | 1 | 0 | 1 | 0 | 0 | 1 | 0 | 0 | 1 | 5 |
| <u>ATPAF1</u>        | 1 | 1 | 0 | 1 | 0 | 0 | 1 | 0 | 0 | 1 | 5 |
| <u>CREB3L2</u>       | 1 | 1 | 0 | 1 | 0 | 0 | 1 | 0 | 0 | 1 | 5 |
| <u>ARV1</u>          | 1 | 1 | 0 | 1 | 0 | 0 | 1 | 1 | 0 | 0 | 5 |
| <u>IL25</u>          | 1 | 0 | 1 | 1 | 0 | 0 | 1 | 0 | 0 | 1 | 5 |
| <u>YTHDC2</u>        | 1 | 1 | 0 | 1 | 0 | 0 | 1 | 0 | 0 | 1 | 5 |
| <u>SLA</u>           | 1 | 0 | 1 | 1 | 0 | 0 | 1 | 0 | 0 | 1 | 5 |

|                |   |   |   |   |   |   |   |   |   |   |   |
|----------------|---|---|---|---|---|---|---|---|---|---|---|
| <u>SLC1A2</u>  | 1 | 1 | 0 | 1 | 0 | 0 | 1 | 0 | 0 | 1 | 5 |
| <u>SLC2A1</u>  | 0 | 1 | 1 | 1 | 0 | 0 | 1 | 0 | 0 | 1 | 5 |
| <u>PCDH15</u>  | 0 | 0 | 1 | 1 | 0 | 0 | 1 | 0 | 1 | 1 | 5 |
| <u>ZNF649</u>  | 1 | 1 | 0 | 1 | 0 | 0 | 1 | 0 | 0 | 1 | 5 |
| <u>SLC7A1</u>  | 1 | 1 | 0 | 1 | 0 | 0 | 1 | 0 | 0 | 1 | 5 |
| <u>BMP8B</u>   | 1 | 1 | 0 | 1 | 0 | 0 | 1 | 0 | 0 | 1 | 5 |
| <u>SLC22A3</u> | 1 | 1 | 0 | 1 | 0 | 0 | 1 | 0 | 0 | 1 | 5 |
| <u>SLC22A2</u> | 1 | 1 | 0 | 1 | 0 | 0 | 1 | 0 | 0 | 1 | 5 |
| <u>SLN</u>     | 1 | 1 | 0 | 1 | 0 | 0 | 1 | 0 | 0 | 1 | 5 |
| <u>HLTF</u>    | 1 | 1 | 0 | 1 | 0 | 0 | 1 | 0 | 0 | 1 | 5 |
| <u>BOLL</u>    | 1 | 0 | 1 | 1 | 0 | 0 | 1 | 0 | 0 | 1 | 5 |
| <u>SUMO3</u>   | 1 | 1 | 0 | 1 | 0 | 0 | 1 | 0 | 0 | 1 | 5 |
| <u>SIGLEC1</u> | 1 | 1 | 0 | 1 | 0 | 0 | 1 | 0 | 0 | 1 | 5 |
| <u>SNX1</u>    | 1 | 1 | 0 | 1 | 0 | 0 | 1 | 0 | 0 | 1 | 5 |
| <u>SNTB2</u>   | 1 | 1 | 0 | 1 | 0 | 0 | 1 | 0 | 0 | 1 | 5 |
| <u>SOS1</u>    | 1 | 1 | 1 | 1 | 0 | 0 | 0 | 0 | 0 | 1 | 5 |
| <u>SOX5</u>    | 1 | 0 | 0 | 1 | 1 | 1 | 0 | 0 | 0 | 1 | 5 |
| <u>SP1</u>     | 1 | 1 | 0 | 1 | 0 | 0 | 1 | 0 | 0 | 1 | 5 |
| <u>SPTBN1</u>  | 1 | 1 | 0 | 1 | 0 | 0 | 1 | 0 | 0 | 1 | 5 |
| <u>SRF</u>     | 1 | 1 | 0 | 1 | 0 | 0 | 1 | 0 | 0 | 1 | 5 |
| <u>SSB</u>     | 1 | 1 | 1 | 1 | 0 | 0 | 1 | 0 | 0 | 0 | 5 |
| <u>STAT3</u>   | 1 | 1 | 0 | 1 | 0 | 0 | 1 | 0 | 0 | 1 | 5 |
| <u>STK4</u>    | 1 | 1 | 0 | 1 | 0 | 0 | 1 | 0 | 0 | 1 | 5 |
| <u>VAMP1</u>   | 1 | 1 | 0 | 1 | 0 | 0 | 1 | 1 | 0 | 0 | 5 |
| <u>KLF9</u>    | 1 | 1 | 0 | 1 | 0 | 0 | 1 | 0 | 0 | 1 | 5 |
| <u>TAP2</u>    | 1 | 1 | 1 | 1 | 0 | 0 | 0 | 0 | 0 | 1 | 5 |
| <u>TBXA2R</u>  | 1 | 1 | 1 | 1 | 0 | 0 | 1 | 0 | 0 | 0 | 5 |
| <u>HNF1B</u>   | 1 | 1 | 0 | 1 | 0 | 0 | 1 | 0 | 0 | 1 | 5 |
| <u>C2orf3</u>  | 1 | 0 | 1 | 1 | 0 | 0 | 1 | 0 | 0 | 1 | 5 |
| <u>ACTC1</u>   | 1 | 1 | 0 | 1 | 0 | 0 | 1 | 0 | 0 | 1 | 5 |
| <u>TEAD1</u>   | 1 | 1 | 0 | 1 | 0 | 0 | 1 | 0 | 0 | 1 | 5 |
| <u>TFPI</u>    | 1 | 1 | 0 | 1 | 0 | 0 | 1 | 0 | 0 | 1 | 5 |
| <u>TFRC</u>    | 1 | 0 | 1 | 1 | 0 | 0 | 1 | 0 | 0 | 1 | 5 |
| <u>TGFA</u>    | 0 | 1 | 0 | 1 | 0 | 0 | 1 | 1 | 0 | 1 | 5 |
| <u>TGFBR2</u>  | 1 | 1 | 0 | 1 | 0 | 0 | 1 | 0 | 0 | 1 | 5 |
| <u>TGFBR3</u>  | 1 | 1 | 0 | 1 | 0 | 0 | 1 | 1 | 0 | 0 | 5 |
| <u>TIAL1</u>   | 1 | 1 | 0 | 1 | 0 | 0 | 1 | 0 | 0 | 1 | 5 |
| <u>TLOC1</u>   | 1 | 1 | 0 | 1 | 0 | 0 | 1 | 0 | 0 | 1 | 5 |
| <u>TMEM1</u>   | 1 | 1 | 0 | 1 | 0 | 0 | 1 | 0 | 0 | 1 | 5 |
| <u>TMPRSS2</u> | 1 | 0 | 1 | 1 | 0 | 0 | 1 | 0 | 0 | 1 | 5 |
| <u>TPD52</u>   | 1 | 1 | 0 | 1 | 0 | 0 | 1 | 0 | 0 | 1 | 5 |

|                  |   |   |   |   |   |   |   |   |   |   |   |
|------------------|---|---|---|---|---|---|---|---|---|---|---|
| <u>TRAF1</u>     | 1 | 1 | 0 | 1 | 0 | 0 | 1 | 0 | 0 | 1 | 5 |
| <u>TRPC1</u>     | 1 | 1 | 0 | 1 | 0 | 0 | 1 | 0 | 0 | 1 | 5 |
| <u>TRPC6</u>     | 1 | 1 | 0 | 1 | 0 | 0 | 1 | 0 | 0 | 1 | 5 |
| <u>TUB</u>       | 1 | 1 | 0 | 1 | 0 | 0 | 1 | 0 | 0 | 1 | 5 |
| <u>TXK</u>       | 1 | 1 | 0 | 1 | 0 | 0 | 1 | 0 | 0 | 1 | 5 |
| <u>UBE2A</u>     | 1 | 0 | 1 | 1 | 0 | 0 | 1 | 0 | 0 | 1 | 5 |
| <u>USH2A</u>     | 1 | 1 | 0 | 1 | 0 | 0 | 1 | 0 | 0 | 1 | 5 |
| <u>UVRAG</u>     | 1 | 1 | 0 | 1 | 0 | 0 | 1 | 0 | 0 | 1 | 5 |
| <u>VCAM1</u>     | 1 | 1 | 0 | 1 | 0 | 0 | 1 | 0 | 0 | 1 | 5 |
| <u>VIPR2</u>     | 1 | 1 | 0 | 1 | 0 | 0 | 1 | 0 | 0 | 1 | 5 |
| <u>WFS1</u>      | 1 | 1 | 0 | 1 | 0 | 0 | 1 | 0 | 0 | 1 | 5 |
| <u>WHSC1</u>     | 1 | 1 | 0 | 1 | 0 | 0 | 1 | 0 | 0 | 1 | 5 |
| <u>WNT11</u>     | 1 | 1 | 0 | 1 | 1 | 0 | 1 | 0 | 0 | 0 | 5 |
| <u>LOC751071</u> | 1 | 1 | 0 | 1 | 0 | 0 | 1 | 0 | 0 | 1 | 5 |
| <u>YWHAB</u>     | 1 | 1 | 0 | 1 | 0 | 0 | 1 | 0 | 0 | 1 | 5 |
| <u>SF1</u>       | 1 | 1 | 0 | 1 | 0 | 0 | 1 | 0 | 0 | 1 | 5 |
| <u>ZFX</u>       | 1 | 1 | 0 | 1 | 0 | 0 | 1 | 0 | 0 | 1 | 5 |
| <u>ZFY</u>       | 1 | 1 | 0 | 1 | 0 | 0 | 1 | 0 | 1 | 0 | 5 |
| <u>ZNF33B</u>    | 1 | 1 | 0 | 1 | 0 | 0 | 1 | 0 | 0 | 1 | 5 |
| <u>ZKSCAN1</u>   | 1 | 1 | 0 | 1 | 0 | 0 | 1 | 0 | 0 | 1 | 5 |
| <u>ZNF37A</u>    | 1 | 0 | 1 | 1 | 0 | 0 | 1 | 0 | 0 | 1 | 5 |
| <u>CA3</u>       | 1 | 1 | 0 | 1 | 0 | 0 | 1 | 0 | 0 | 1 | 5 |
| <u>ZNF75</u>     | 1 | 1 | 0 | 1 | 0 | 0 | 1 | 0 | 0 | 1 | 5 |
| <u>CA8</u>       | 1 | 1 | 0 | 1 | 0 | 0 | 1 | 0 | 0 | 1 | 5 |
| <u>ZNF131</u>    | 1 | 1 | 0 | 1 | 0 | 0 | 1 | 0 | 0 | 1 | 5 |
| <u>ZNF175</u>    | 1 | 1 | 0 | 1 | 0 | 0 | 1 | 0 | 0 | 1 | 5 |
| <u>ZNF207</u>    | 1 | 1 | 0 | 1 | 0 | 0 | 1 | 0 | 0 | 1 | 5 |
| <u>ZNF229</u>    | 1 | 1 | 0 | 1 | 0 | 0 | 1 | 0 | 0 | 1 | 5 |
| <u>ZNF236</u>    | 1 | 1 | 0 | 1 | 0 | 0 | 1 | 0 | 0 | 1 | 5 |
| <u>LRP8</u>      | 1 | 1 | 0 | 1 | 0 | 0 | 1 | 0 | 0 | 1 | 5 |
| <u>EVI5</u>      | 1 | 1 | 0 | 1 | 0 | 0 | 1 | 0 | 0 | 1 | 5 |
| <u>CACNB2</u>    | 1 | 0 | 0 | 1 | 1 | 0 | 1 | 0 | 0 | 1 | 5 |
| <u>CACNB2</u>    | 1 | 1 | 0 | 1 | 1 | 0 | 0 | 0 | 0 | 1 | 5 |
| <u>SLMAP</u>     | 1 | 1 | 0 | 1 | 0 | 0 | 1 | 0 | 0 | 1 | 5 |
| <u>OTUB2</u>     | 1 | 1 | 0 | 1 | 0 | 0 | 1 | 0 | 0 | 1 | 5 |
| <u>ZNF655</u>    | 1 | 0 | 1 | 1 | 0 | 0 | 1 | 0 | 0 | 1 | 5 |
| <u>SECISBP2</u>  | 1 | 1 | 0 | 1 | 0 | 0 | 1 | 0 | 0 | 1 | 5 |
| <u>REEP5</u>     | 1 | 1 | 0 | 1 | 0 | 0 | 1 | 0 | 0 | 1 | 5 |
| <u>TRPM8</u>     | 1 | 1 | 0 | 1 | 0 | 0 | 1 | 0 | 0 | 1 | 5 |
| <u>C1orf50</u>   | 1 | 1 | 0 | 1 | 0 | 0 | 1 | 0 | 0 | 1 | 5 |
| <u>C19orf42</u>  | 1 | 1 | 0 | 1 | 0 | 0 | 1 | 0 | 0 | 1 | 5 |

|                  |   |   |   |   |   |   |   |   |   |   |   |
|------------------|---|---|---|---|---|---|---|---|---|---|---|
| <u>C1orf116</u>  | 1 | 1 | 0 | 1 | 0 | 0 | 1 | 0 | 0 | 1 | 5 |
| <u>FCRL2</u>     | 1 | 1 | 0 | 1 | 0 | 0 | 1 | 1 | 0 | 0 | 5 |
| <u>C4orf15</u>   | 1 | 1 | 1 | 1 | 0 | 0 | 1 | 0 | 0 | 0 | 5 |
| <u>RNF128</u>    | 1 | 1 | 0 | 1 | 0 | 0 | 1 | 0 | 0 | 1 | 5 |
| <u>MUL1</u>      | 1 | 1 | 0 | 1 | 0 | 0 | 1 | 0 | 0 | 1 | 5 |
| <u>FAM118B</u>   | 1 | 1 | 0 | 1 | 0 | 0 | 1 | 0 | 1 | 0 | 5 |
| <u>RIC3</u>      | 1 | 1 | 0 | 1 | 0 | 0 | 1 | 0 | 0 | 1 | 5 |
| <u>ACSS3</u>     | 1 | 1 | 0 | 1 | 0 | 0 | 1 | 0 | 0 | 1 | 5 |
| <u>PANK3</u>     | 1 | 1 | 0 | 1 | 0 | 0 | 1 | 0 | 0 | 1 | 5 |
| <u>DYNC2H1</u>   | 0 | 1 | 1 | 1 | 0 | 0 | 1 | 0 | 0 | 1 | 5 |
| <u>ZNF329</u>    | 0 | 1 | 1 | 1 | 0 | 0 | 1 | 0 | 0 | 1 | 5 |
| <u>ZYG11B</u>    | 1 | 1 | 0 | 1 | 0 | 0 | 1 | 0 | 0 | 1 | 5 |
| <u>NOL9</u>      | 1 | 1 | 0 | 1 | 0 | 0 | 1 | 0 | 0 | 1 | 5 |
| <u>CCDC51</u>    | 1 | 1 | 0 | 1 | 0 | 0 | 1 | 0 | 0 | 1 | 5 |
| <u>PPCS</u>      | 1 | 1 | 0 | 1 | 0 | 0 | 1 | 0 | 0 | 1 | 5 |
| <u>TBL1XR1</u>   | 0 | 1 | 1 | 1 | 0 | 0 | 1 | 0 | 0 | 1 | 5 |
| <u>TTLL7</u>     | 1 | 1 | 0 | 1 | 0 | 0 | 1 | 0 | 0 | 1 | 5 |
| <u>ZNF419</u>    | 1 | 1 | 0 | 1 | 0 | 0 | 1 | 0 | 0 | 1 | 5 |
| <u>ZNF750</u>    | 1 | 1 | 0 | 1 | 0 | 0 | 1 | 0 | 0 | 1 | 5 |
| <u>ALG9</u>      | 1 | 0 | 1 | 1 | 0 | 0 | 1 | 0 | 0 | 1 | 5 |
| <u>VASH2</u>     | 1 | 1 | 0 | 1 | 0 | 0 | 1 | 0 | 0 | 1 | 5 |
| <u>GSTCD</u>     | 1 | 0 | 1 | 1 | 0 | 0 | 1 | 0 | 0 | 1 | 5 |
| <u>NPAL2</u>     | 1 | 1 | 0 | 1 | 0 | 0 | 1 | 0 | 0 | 1 | 5 |
| <u>ZMYM1</u>     | 1 | 1 | 0 | 1 | 0 | 0 | 1 | 0 | 0 | 1 | 5 |
| <u>PIP4K2C</u>   | 1 | 1 | 0 | 1 | 0 | 0 | 1 | 0 | 0 | 1 | 5 |
| <u>TUBAL3</u>    | 1 | 1 | 0 | 1 | 0 | 0 | 1 | 0 | 0 | 1 | 5 |
| <u>THSD4</u>     | 1 | 1 | 0 | 1 | 0 | 0 | 1 | 0 | 0 | 1 | 5 |
| <u>ZNF212</u>    | 1 | 1 | 0 | 1 | 0 | 0 | 1 | 0 | 0 | 1 | 5 |
| <u>MAP9</u>      | 1 | 1 | 0 | 1 | 0 | 0 | 1 | 0 | 0 | 1 | 5 |
| <u>LPCAT1</u>    | 1 | 1 | 0 | 1 | 0 | 0 | 1 | 0 | 0 | 1 | 5 |
| <u>C10orf119</u> | 1 | 1 | 0 | 1 | 0 | 0 | 1 | 0 | 0 | 1 | 5 |
| <u>FLJ14213</u>  | 1 | 1 | 0 | 1 | 0 | 0 | 1 | 0 | 0 | 1 | 5 |
| <u>UBXD6</u>     | 1 | 1 | 0 | 1 | 0 | 0 | 1 | 0 | 0 | 1 | 5 |
| <u>SLC35E1</u>   | 1 | 1 | 0 | 1 | 0 | 0 | 1 | 0 | 0 | 1 | 5 |
| <u>C7orf58</u>   | 1 | 1 | 0 | 1 | 0 | 0 | 1 | 0 | 0 | 1 | 5 |
| <u>NIP30</u>     | 1 | 1 | 0 | 1 | 0 | 0 | 1 | 0 | 0 | 1 | 5 |
| <u>PANK2</u>     | 1 | 1 | 0 | 1 | 0 | 0 | 1 | 0 | 0 | 1 | 5 |
| <u>TRPM3</u>     | 1 | 1 | 0 | 1 | 0 | 0 | 1 | 0 | 0 | 1 | 5 |
| <u>C2orf37</u>   | 1 | 1 | 0 | 1 | 0 | 0 | 1 | 0 | 0 | 1 | 5 |
| <u>VCPIP1</u>    | 1 | 1 | 0 | 1 | 0 | 0 | 1 | 0 | 0 | 1 | 5 |
| <u>C6orf97</u>   | 1 | 1 | 0 | 1 | 0 | 0 | 1 | 0 | 0 | 1 | 5 |

|                   |   |   |   |   |   |   |   |   |   |   |   |
|-------------------|---|---|---|---|---|---|---|---|---|---|---|
| <u>NR4A3</u>      | 1 | 0 | 0 | 1 | 1 | 1 | 0 | 0 | 0 | 1 | 5 |
| <u>PQLC1</u>      | 1 | 1 | 0 | 1 | 0 | 0 | 1 | 0 | 0 | 1 | 5 |
| <u>IFT74</u>      | 1 | 0 | 1 | 1 | 0 | 0 | 1 | 0 | 1 | 0 | 5 |
| <u>SPSB1</u>      | 1 | 1 | 0 | 1 | 0 | 0 | 1 | 0 | 0 | 1 | 5 |
| <u>RNF34</u>      | 1 | 1 | 0 | 1 | 1 | 0 | 0 | 0 | 0 | 1 | 5 |
| <u>CCDC92</u>     | 1 | 1 | 0 | 1 | 0 | 0 | 1 | 0 | 0 | 1 | 5 |
| <u>TM2D3</u>      | 1 | 1 | 0 | 1 | 0 | 0 | 1 | 1 | 0 | 0 | 5 |
| <u>COQ10B</u>     | 1 | 1 | 0 | 1 | 0 | 0 | 1 | 0 | 0 | 1 | 5 |
| <u>LHX3</u>       | 1 | 1 | 0 | 1 | 0 | 0 | 1 | 0 | 0 | 1 | 5 |
| <u>WDR26</u>      | 1 | 1 | 0 | 1 | 0 | 0 | 1 | 0 | 0 | 1 | 5 |
| <u>C16orf70</u>   | 1 | 1 | 0 | 1 | 0 | 0 | 1 | 0 | 0 | 1 | 5 |
| <u>CCDC6</u>      | 1 | 1 | 0 | 1 | 0 | 0 | 1 | 0 | 0 | 1 | 5 |
| <u>ZKSCAN3</u>    | 0 | 1 | 1 | 1 | 0 | 0 | 1 | 0 | 0 | 1 | 5 |
| <u>WDR82</u>      | 1 | 1 | 0 | 1 | 0 | 0 | 1 | 0 | 0 | 1 | 5 |
| <u>WDR23</u>      | 1 | 0 | 0 | 1 | 0 | 0 | 1 | 1 | 0 | 1 | 5 |
| <u>CSRP3</u>      | 1 | 1 | 0 | 1 | 0 | 0 | 1 | 0 | 0 | 1 | 5 |
| <u>THSD7B</u>     | 1 | 1 | 0 | 1 | 0 | 0 | 1 | 0 | 0 | 1 | 5 |
| <u>ITIH5</u>      | 1 | 1 | 0 | 1 | 0 | 0 | 1 | 0 | 0 | 1 | 5 |
| <u>WNT5B</u>      | 1 | 1 | 0 | 1 | 0 | 0 | 1 | 0 | 0 | 1 | 5 |
| <u>ZBP1</u>       | 1 | 1 | 0 | 1 | 0 | 0 | 1 | 0 | 0 | 1 | 5 |
| <u>OR51E2</u>     | 1 | 1 | 0 | 1 | 0 | 0 | 1 | 0 | 0 | 1 | 5 |
| <u>GAN</u>        | 1 | 1 | 0 | 1 | 0 | 0 | 1 | 0 | 0 | 1 | 5 |
| <u>SYNC1</u>      | 1 | 1 | 0 | 1 | 0 | 0 | 1 | 0 | 0 | 1 | 5 |
| <u>COL21A1</u>    | 1 | 1 | 0 | 1 | 1 | 0 | 1 | 0 | 0 | 0 | 5 |
| <u>SNX27</u>      | 1 | 1 | 0 | 1 | 0 | 0 | 1 | 0 | 0 | 1 | 5 |
| <u>COIL</u>       | 1 | 1 | 0 | 1 | 0 | 0 | 1 | 0 | 0 | 1 | 5 |
| <u>CCNL2</u>      | 0 | 1 | 1 | 1 | 0 | 0 | 1 | 0 | 0 | 1 | 5 |
| <u>CAMK2G</u>     | 1 | 0 | 0 | 1 | 1 | 1 | 0 | 0 | 0 | 1 | 5 |
| <u>CAMK2G</u>     | 1 | 0 | 0 | 1 | 1 | 1 | 0 | 0 | 0 | 1 | 5 |
| <u>CAMK2G</u>     | 1 | 0 | 0 | 1 | 1 | 1 | 0 | 0 | 0 | 1 | 5 |
| <u>ST6GALNAC5</u> | 1 | 1 | 0 | 1 | 0 | 0 | 1 | 0 | 0 | 1 | 5 |
| <u>LAS1L</u>      | 1 | 1 | 0 | 1 | 0 | 0 | 1 | 0 | 0 | 1 | 5 |
| <u>NCOA3</u>      | 1 | 1 | 0 | 1 | 0 | 0 | 1 | 0 | 0 | 1 | 5 |
| <u>HDHD1A</u>     | 1 | 0 | 1 | 1 | 0 | 0 | 1 | 0 | 0 | 1 | 5 |
| <u>SMC1A</u>      | 1 | 1 | 0 | 1 | 0 | 0 | 1 | 0 | 0 | 1 | 5 |
| <u>UBL4A</u>      | 1 | 1 | 0 | 1 | 0 | 0 | 1 | 0 | 0 | 1 | 5 |
| <u>CAPZA2</u>     | 1 | 1 | 0 | 1 | 0 | 0 | 1 | 0 | 0 | 1 | 5 |
| <u>BRAP</u>       | 1 | 1 | 1 | 1 | 0 | 0 | 0 | 0 | 1 | 0 | 5 |
| <u>FCRL5</u>      | 1 | 1 | 0 | 1 | 0 | 0 | 1 | 0 | 0 | 1 | 5 |
| <u>RAB33B</u>     | 1 | 1 | 0 | 1 | 0 | 0 | 1 | 0 | 0 | 1 | 5 |
| <u>CASP2</u>      | 1 | 1 | 0 | 1 | 0 | 0 | 1 | 0 | 0 | 1 | 5 |

|                  |   |   |   |   |   |   |   |   |   |   |   |
|------------------|---|---|---|---|---|---|---|---|---|---|---|
| <u>TMEM47</u>    | 1 | 1 | 0 | 1 | 0 | 0 | 1 | 0 | 0 | 1 | 5 |
| <u>AMMECR1L</u>  | 1 | 1 | 0 | 1 | 0 | 0 | 1 | 0 | 0 | 1 | 5 |
| <u>C19orf12</u>  | 1 | 0 | 1 | 1 | 0 | 0 | 1 | 0 | 0 | 1 | 5 |
| <u>FAM107B</u>   | 1 | 1 | 0 | 1 | 0 | 0 | 1 | 0 | 0 | 1 | 5 |
| <u>C8orf13</u>   | 1 | 1 | 0 | 1 | 0 | 0 | 1 | 0 | 0 | 1 | 5 |
| <u>CRISPLD1</u>  | 1 | 1 | 0 | 1 | 0 | 0 | 1 | 0 | 0 | 1 | 5 |
| <u>FRMD8</u>     | 1 | 1 | 0 | 1 | 0 | 0 | 1 | 0 | 0 | 1 | 5 |
| <u>SYT16</u>     | 1 | 1 | 0 | 1 | 0 | 0 | 1 | 0 | 0 | 1 | 5 |
| <u>TMTC1</u>     | 1 | 1 | 0 | 1 | 0 | 0 | 1 | 0 | 0 | 1 | 5 |
| <u>TTLL2</u>     | 1 | 1 | 0 | 1 | 0 | 0 | 1 | 0 | 0 | 1 | 5 |
| <u>KCTD10</u>    | 1 | 1 | 0 | 1 | 0 | 0 | 1 | 0 | 0 | 1 | 5 |
| <u>TMEM133</u>   | 1 | 1 | 0 | 1 | 1 | 0 | 1 | 0 | 0 | 0 | 5 |
| <u>PIP4K2B</u>   | 1 | 1 | 0 | 1 | 0 | 0 | 1 | 0 | 0 | 1 | 5 |
| <u>ANKRD27</u>   | 1 | 1 | 0 | 1 | 0 | 0 | 1 | 0 | 0 | 1 | 5 |
| <u>ULK1</u>      | 1 | 1 | 0 | 1 | 0 | 0 | 1 | 0 | 0 | 1 | 5 |
| <u>ZNRF3</u>     | 1 | 1 | 0 | 1 | 0 | 0 | 1 | 0 | 0 | 1 | 5 |
| <u>SLC7A6OS</u>  | 1 | 1 | 0 | 1 | 0 | 0 | 1 | 0 | 0 | 1 | 5 |
| <u>ZDHHC18</u>   | 1 | 1 | 0 | 1 | 0 | 0 | 1 | 0 | 0 | 1 | 5 |
| <u>MED10</u>     | 1 | 1 | 0 | 1 | 0 | 0 | 1 | 0 | 0 | 1 | 5 |
| <u>SLC37A3</u>   | 1 | 1 | 0 | 1 | 0 | 0 | 1 | 0 | 0 | 1 | 5 |
| <u>HSDL2</u>     | 1 | 1 | 0 | 1 | 0 | 0 | 1 | 0 | 0 | 1 | 5 |
| <u>YIPF4</u>     | 1 | 1 | 0 | 1 | 0 | 0 | 1 | 0 | 0 | 1 | 5 |
| <u>STK24</u>     | 1 | 1 | 0 | 1 | 0 | 0 | 1 | 0 | 0 | 1 | 5 |
| <u>BRMS1L</u>    | 1 | 1 | 0 | 1 | 0 | 0 | 1 | 0 | 1 | 0 | 5 |
| <u>PCGF5</u>     | 1 | 1 | 0 | 1 | 0 | 0 | 1 | 0 | 0 | 1 | 5 |
| <u>SOAT2</u>     | 1 | 1 | 0 | 1 | 0 | 0 | 1 | 0 | 0 | 1 | 5 |
| <u>KIAA1826</u>  | 1 | 1 | 0 | 1 | 0 | 0 | 1 | 0 | 0 | 1 | 5 |
| <u>LCOR</u>      | 1 | 1 | 0 | 1 | 0 | 0 | 1 | 0 | 0 | 1 | 5 |
| <u>BTBD12</u>    | 1 | 1 | 0 | 1 | 0 | 0 | 1 | 0 | 0 | 1 | 5 |
| <u>MEGF11</u>    | 1 | 1 | 0 | 1 | 0 | 0 | 1 | 0 | 0 | 1 | 5 |
| <u>ZNF527</u>    | 0 | 1 | 1 | 1 | 0 | 0 | 1 | 0 | 0 | 1 | 5 |
| <u>C14orf142</u> | 1 | 1 | 0 | 1 | 0 | 0 | 1 | 0 | 0 | 1 | 5 |
| <u>KIAA1853</u>  | 1 | 1 | 0 | 1 | 0 | 0 | 1 | 0 | 0 | 1 | 5 |
| <u>ACSS1</u>     | 1 | 1 | 0 | 1 | 0 | 0 | 1 | 0 | 0 | 1 | 5 |
| <u>KBTBD8</u>    | 1 | 1 | 0 | 1 | 0 | 0 | 1 | 0 | 0 | 1 | 5 |
| <u>TMEM185A</u>  | 1 | 1 | 0 | 1 | 0 | 0 | 1 | 0 | 0 | 1 | 5 |
| <u>PARD6G</u>    | 1 | 1 | 0 | 1 | 0 | 0 | 1 | 0 | 0 | 1 | 5 |
| <u>KLF11</u>     | 1 | 1 | 0 | 1 | 0 | 0 | 1 | 0 | 0 | 1 | 5 |
| <u>TTBK1</u>     | 1 | 1 | 0 | 1 | 0 | 0 | 1 | 0 | 0 | 1 | 5 |
| <u>CCDC62</u>    | 1 | 1 | 0 | 1 | 0 | 0 | 1 | 0 | 0 | 1 | 5 |
| <u>GPT2</u>      | 1 | 1 | 0 | 1 | 0 | 0 | 1 | 1 | 0 | 0 | 5 |



|                 |   |   |   |   |   |   |   |   |   |   |   |
|-----------------|---|---|---|---|---|---|---|---|---|---|---|
| <u>FCRLA</u>    | 1 | 1 | 0 | 1 | 0 | 0 | 1 | 0 | 0 | 1 | 5 |
| <u>MINA</u>     | 1 | 0 | 1 | 1 | 0 | 0 | 1 | 0 | 0 | 1 | 5 |
| <u>RPUSD4</u>   | 1 | 1 | 0 | 1 | 0 | 0 | 1 | 0 | 0 | 1 | 5 |
| <u>C9orf100</u> | 1 | 1 | 0 | 1 | 0 | 0 | 1 | 0 | 0 | 1 | 5 |
| <u>SLC35B4</u>  | 1 | 1 | 0 | 1 | 0 | 0 | 1 | 0 | 0 | 1 | 5 |
| <u>ZNF587</u>   | 1 | 1 | 0 | 1 | 0 | 0 | 1 | 0 | 0 | 1 | 5 |
| <u>LRP11</u>    | 1 | 1 | 0 | 1 | 0 | 0 | 1 | 0 | 0 | 1 | 5 |
| <u>FIBCD1</u>   | 1 | 1 | 0 | 1 | 0 | 0 | 1 | 0 | 0 | 1 | 5 |
| <u>RAB2B</u>    | 1 | 1 | 0 | 1 | 0 | 0 | 1 | 0 | 0 | 1 | 5 |
| <u>RANBP3</u>   | 1 | 1 | 0 | 1 | 0 | 0 | 1 | 0 | 0 | 1 | 5 |
| <u>ARHGAP19</u> | 1 | 1 | 0 | 1 | 0 | 0 | 1 | 1 | 0 | 0 | 5 |
| <u>C18orf45</u> | 1 | 1 | 0 | 1 | 0 | 0 | 1 | 0 | 0 | 1 | 5 |
| <u>DDO</u>      | 1 | 1 | 0 | 1 | 0 | 0 | 1 | 0 | 0 | 1 | 5 |
| <u>KRTAP4-5</u> | 1 | 1 | 0 | 1 | 0 | 0 | 1 | 0 | 0 | 1 | 5 |
| <u>CYP4F2</u>   | 1 | 1 | 0 | 1 | 0 | 0 | 1 | 0 | 0 | 1 | 5 |
| <u>CSDA</u>     | 1 | 1 | 0 | 1 | 1 | 0 | 1 | 0 | 0 | 0 | 5 |
| <u>ALG2</u>     | 1 | 1 | 0 | 1 | 0 | 0 | 1 | 0 | 0 | 1 | 5 |
| <u>EAF1</u>     | 1 | 1 | 0 | 1 | 0 | 0 | 1 | 0 | 0 | 1 | 5 |
| <u>ZIC5</u>     | 1 | 1 | 0 | 1 | 0 | 0 | 1 | 0 | 0 | 1 | 5 |
| <u>CGGBP1</u>   | 1 | 1 | 0 | 1 | 1 | 0 | 0 | 0 | 0 | 1 | 5 |
| <u>ZNF518B</u>  | 1 | 1 | 0 | 1 | 0 | 0 | 1 | 0 | 0 | 1 | 5 |
| <u>FHDC1</u>    | 1 | 1 | 0 | 1 | 0 | 0 | 1 | 0 | 0 | 1 | 5 |
| <u>SELI</u>     | 1 | 1 | 0 | 1 | 0 | 0 | 1 | 0 | 0 | 1 | 5 |
| <u>CDC14A</u>   | 1 | 1 | 0 | 1 | 0 | 0 | 1 | 0 | 0 | 1 | 5 |
| <u>PDXK</u>     | 1 | 1 | 0 | 1 | 0 | 0 | 1 | 0 | 0 | 1 | 5 |
| <u>CASK</u>     | 1 | 1 | 1 | 1 | 0 | 0 | 1 | 0 | 0 | 0 | 5 |
| <u>GTPBP10</u>  | 1 | 1 | 0 | 1 | 0 | 0 | 1 | 0 | 0 | 1 | 5 |
| <u>ACTL6A</u>   | 1 | 0 | 0 | 1 | 1 | 0 | 1 | 0 | 0 | 1 | 5 |
| <u>TNFSF11</u>  | 1 | 1 | 0 | 1 | 1 | 0 | 0 | 0 | 0 | 1 | 5 |
| <u>SLC25A12</u> | 1 | 1 | 0 | 1 | 0 | 0 | 1 | 0 | 0 | 1 | 5 |
| <u>KCNK5</u>    | 1 | 1 | 0 | 1 | 0 | 0 | 1 | 0 | 0 | 1 | 5 |
| <u>DDX3Y</u>    | 1 | 0 | 1 | 1 | 0 | 0 | 0 | 1 | 0 | 1 | 5 |
| <u>CBL</u>      | 1 | 1 | 0 | 1 | 0 | 0 | 1 | 0 | 0 | 1 | 5 |
| <u>SLC4A4</u>   | 1 | 1 | 0 | 1 | 0 | 0 | 1 | 0 | 0 | 1 | 5 |
| <u>STX11</u>    | 1 | 1 | 0 | 1 | 0 | 0 | 1 | 0 | 0 | 1 | 5 |
| <u>GALNT4</u>   | 0 | 1 | 1 | 1 | 0 | 0 | 1 | 0 | 0 | 1 | 5 |
| <u>NOL4</u>     | 1 | 1 | 0 | 1 | 0 | 0 | 1 | 0 | 0 | 1 | 5 |
| <u>SNX4</u>     | 1 | 1 | 0 | 1 | 0 | 0 | 1 | 0 | 0 | 1 | 5 |
| <u>C19orf2</u>  | 1 | 1 | 0 | 1 | 0 | 0 | 1 | 0 | 0 | 1 | 5 |
| <u>EED</u>      | 1 | 1 | 0 | 1 | 1 | 0 | 0 | 0 | 0 | 1 | 5 |
| <u>ADAM9</u>    | 1 | 1 | 0 | 1 | 1 | 0 | 1 | 0 | 0 | 0 | 5 |

|                   |   |   |   |   |   |   |   |   |   |   |   |
|-------------------|---|---|---|---|---|---|---|---|---|---|---|
| <u>MTMR1</u>      | 1 | 1 | 0 | 1 | 0 | 0 | 1 | 0 | 0 | 1 | 5 |
| <u>CCNK</u>       | 0 | 1 | 1 | 1 | 0 | 0 | 1 | 0 | 0 | 1 | 5 |
| <u>CCNK</u>       | 0 | 1 | 0 | 1 | 1 | 1 | 0 | 0 | 0 | 1 | 5 |
| <u>WDR22</u>      | 1 | 1 | 0 | 1 | 0 | 0 | 1 | 0 | 0 | 1 | 5 |
| <u>AKAP4</u>      | 1 | 1 | 0 | 1 | 0 | 0 | 1 | 0 | 0 | 1 | 5 |
| <u>PRPF4B</u>     | 1 | 1 | 0 | 1 | 0 | 0 | 1 | 0 | 0 | 1 | 5 |
| <u>HERC3</u>      | 1 | 1 | 0 | 1 | 0 | 0 | 1 | 0 | 0 | 1 | 5 |
| <u>BSN</u>        | 1 | 1 | 0 | 1 | 0 | 0 | 1 | 0 | 0 | 1 | 5 |
| <u>MBD4</u>       | 1 | 1 | 0 | 1 | 0 | 0 | 1 | 0 | 0 | 1 | 5 |
| <u>AP3D1</u>      | 1 | 1 | 0 | 1 | 0 | 0 | 1 | 0 | 0 | 1 | 5 |
| <u>BTRC</u>       | 1 | 1 | 0 | 1 | 0 | 0 | 1 | 0 | 0 | 1 | 5 |
| <u>P4HA2</u>      | 1 | 0 | 0 | 1 | 0 | 0 | 1 | 0 | 1 | 1 | 5 |
| <u>NAV1</u>       | 1 | 1 | 0 | 1 | 0 | 0 | 1 | 0 | 0 | 1 | 5 |
| <u>SEC16B</u>     | 1 | 1 | 0 | 1 | 0 | 0 | 1 | 0 | 0 | 1 | 5 |
| <u>STBD1</u>      | 1 | 1 | 0 | 1 | 0 | 0 | 1 | 0 | 0 | 1 | 5 |
| <u>KBTBD6</u>     | 1 | 1 | 0 | 1 | 0 | 0 | 1 | 0 | 0 | 1 | 5 |
| <u>CCNF</u>       | 1 | 1 | 0 | 1 | 0 | 0 | 1 | 0 | 0 | 1 | 5 |
| <u>LIMD1</u>      | 1 | 1 | 0 | 1 | 0 | 0 | 1 | 0 | 0 | 1 | 5 |
| <u>KALRN</u>      | 1 | 1 | 0 | 1 | 0 | 0 | 1 | 0 | 0 | 1 | 5 |
| <u>CDKL2</u>      | 1 | 1 | 0 | 1 | 0 | 0 | 1 | 0 | 0 | 1 | 5 |
| <u>CCNG1</u>      | 1 | 0 | 1 | 1 | 0 | 0 | 1 | 0 | 0 | 1 | 5 |
| <u>UBE2CBP</u>    | 0 | 1 | 0 | 1 | 0 | 0 | 1 | 1 | 0 | 1 | 5 |
| <u>TAF1A</u>      | 0 | 1 | 1 | 1 | 0 | 0 | 1 | 0 | 0 | 1 | 5 |
| <u>SEMA5A</u>     | 1 | 1 | 0 | 1 | 0 | 0 | 1 | 0 | 0 | 1 | 5 |
| <u>LYRM7</u>      | 1 | 1 | 0 | 1 | 0 | 0 | 1 | 0 | 0 | 1 | 5 |
| <u>SYT7</u>       | 1 | 1 | 0 | 1 | 0 | 0 | 1 | 0 | 0 | 1 | 5 |
| <u>IL33</u>       | 1 | 1 | 0 | 1 | 0 | 0 | 1 | 0 | 0 | 1 | 5 |
| <u>USP14</u>      | 1 | 1 | 0 | 1 | 0 | 0 | 1 | 0 | 0 | 1 | 5 |
| <u>ACVR1B</u>     | 1 | 1 | 0 | 1 | 0 | 0 | 1 | 0 | 0 | 1 | 5 |
| <u>MTMR6</u>      | 1 | 1 | 0 | 1 | 0 | 0 | 1 | 0 | 0 | 1 | 5 |
| <u>CDKN2AIPNL</u> | 0 | 1 | 1 | 1 | 0 | 0 | 1 | 0 | 0 | 1 | 5 |
| <u>CBFA2T2</u>    | 1 | 0 | 0 | 1 | 1 | 0 | 1 | 0 | 0 | 1 | 5 |
| <u>RASL10B</u>    | 1 | 1 | 0 | 1 | 0 | 0 | 1 | 0 | 0 | 1 | 5 |
| <u>ZNF765</u>     | 1 | 1 | 0 | 1 | 0 | 0 | 1 | 0 | 0 | 1 | 5 |
| <u>SFRS2IP</u>    | 1 | 1 | 0 | 1 | 0 | 0 | 1 | 0 | 0 | 1 | 5 |
| <u>YTHDC1</u>     | 1 | 0 | 0 | 1 | 1 | 1 | 0 | 0 | 0 | 1 | 5 |
| <u>ARHGEF2</u>    | 1 | 0 | 0 | 1 | 1 | 0 | 1 | 1 | 0 | 0 | 5 |
| <u>DDX21</u>      | 1 | 1 | 0 | 1 | 0 | 0 | 1 | 0 | 0 | 1 | 5 |
| <u>FAM58A</u>     | 1 | 1 | 0 | 1 | 0 | 0 | 1 | 0 | 0 | 1 | 5 |
| <u>GLYATL1</u>    | 1 | 1 | 0 | 1 | 0 | 0 | 1 | 0 | 0 | 1 | 5 |
| <u>PNMA1</u>      | 0 | 1 | 1 | 1 | 0 | 0 | 1 | 0 | 0 | 1 | 5 |

|                  |   |   |   |   |   |   |   |   |   |   |   |
|------------------|---|---|---|---|---|---|---|---|---|---|---|
| <u>CACNA2D2</u>  | 1 | 0 | 0 | 1 | 1 | 0 | 1 | 0 | 0 | 1 | 5 |
| <u>MOBKL1A</u>   | 1 | 1 | 0 | 1 | 0 | 0 | 1 | 0 | 0 | 1 | 5 |
| <u>CCDC102A</u>  | 1 | 1 | 0 | 1 | 0 | 0 | 1 | 0 | 0 | 1 | 5 |
| <u>PERLD1</u>    | 1 | 1 | 0 | 1 | 0 | 0 | 1 | 0 | 0 | 1 | 5 |
| <u>B4GALT6</u>   | 1 | 1 | 0 | 1 | 0 | 0 | 1 | 0 | 0 | 1 | 5 |
| <u>KL</u>        | 1 | 1 | 0 | 1 | 0 | 0 | 1 | 0 | 0 | 1 | 5 |
| <u>SLC9A3R1</u>  | 1 | 1 | 0 | 1 | 0 | 0 | 1 | 0 | 0 | 1 | 5 |
| <u>ADIPOQ</u>    | 1 | 1 | 0 | 1 | 0 | 0 | 1 | 0 | 0 | 1 | 5 |
| <u>KIF3B</u>     | 1 | 1 | 0 | 1 | 0 | 0 | 1 | 0 | 0 | 1 | 5 |
| <u>NRXN1</u>     | 1 | 0 | 0 | 1 | 1 | 1 | 0 | 0 | 0 | 1 | 5 |
| <u>CIAO1</u>     | 1 | 1 | 0 | 1 | 0 | 0 | 1 | 0 | 0 | 1 | 5 |
| <u>TGFBRAP1</u>  | 1 | 0 | 1 | 1 | 0 | 0 | 1 | 0 | 0 | 1 | 5 |
| <u>ACVRL1</u>    | 1 | 0 | 0 | 1 | 0 | 0 | 1 | 0 | 1 | 1 | 5 |
| <u>ZRANB2</u>    | 1 | 1 | 0 | 1 | 0 | 0 | 1 | 0 | 0 | 1 | 5 |
| <u>TMPRSS11D</u> | 1 | 1 | 0 | 1 | 0 | 0 | 1 | 0 | 0 | 1 | 5 |
| <u>SFXN5</u>     | 1 | 1 | 0 | 1 | 0 | 0 | 1 | 0 | 0 | 1 | 5 |
| <u>ZNF264</u>    | 1 | 1 | 0 | 1 | 0 | 0 | 1 | 0 | 0 | 1 | 5 |
| <u>H2AFV</u>     | 0 | 1 | 1 | 1 | 0 | 0 | 1 | 0 | 0 | 1 | 5 |
| <u>MED26</u>     | 1 | 1 | 0 | 1 | 0 | 0 | 1 | 0 | 0 | 1 | 5 |
| <u>QKI</u>       | 1 | 1 | 0 | 1 | 0 | 0 | 1 | 0 | 0 | 1 | 5 |
| <u>HAND2</u>     | 1 | 1 | 0 | 1 | 0 | 0 | 1 | 0 | 0 | 1 | 5 |
| <u>AKAP7</u>     | 1 | 0 | 0 | 1 | 1 | 1 | 0 | 0 | 0 | 1 | 5 |
| <u>AKAP7</u>     | 1 | 0 | 0 | 1 | 1 | 1 | 0 | 0 | 0 | 1 | 5 |
| <u>PCYT1B</u>    | 1 | 1 | 0 | 1 | 0 | 0 | 1 | 0 | 0 | 1 | 5 |
| <u>AKAP5</u>     | 0 | 1 | 1 | 1 | 0 | 0 | 1 | 0 | 0 | 1 | 5 |
| <u>SLC4A7</u>    | 1 | 1 | 0 | 1 | 0 | 0 | 1 | 0 | 0 | 1 | 5 |
| <u>BAG5</u>      | 1 | 1 | 0 | 1 | 0 | 0 | 1 | 0 | 0 | 1 | 5 |
| <u>H6PD</u>      | 1 | 1 | 0 | 1 | 0 | 0 | 1 | 0 | 0 | 1 | 5 |
| <u>TSGA14</u>    | 1 | 1 | 0 | 1 | 0 | 0 | 1 | 0 | 0 | 1 | 5 |
| <u>CD48</u>      | 0 | 1 | 1 | 1 | 0 | 0 | 1 | 0 | 0 | 1 | 5 |
| <u>CD59</u>      | 1 | 1 | 0 | 1 | 0 | 0 | 0 | 1 | 0 | 1 | 5 |
| <u>CEP135</u>    | 1 | 1 | 0 | 1 | 0 | 0 | 1 | 0 | 0 | 1 | 5 |
| <u>EDEM1</u>     | 1 | 1 | 0 | 1 | 0 | 0 | 1 | 0 | 0 | 1 | 5 |
| <u>USP6NL</u>    | 1 | 1 | 0 | 1 | 0 | 0 | 1 | 0 | 0 | 1 | 5 |
| <u>SEC14L5</u>   | 1 | 1 | 0 | 1 | 0 | 0 | 1 | 0 | 0 | 1 | 5 |
| <u>SEMA3E</u>    | 1 | 1 | 0 | 1 | 0 | 0 | 1 | 0 | 0 | 1 | 5 |
| <u>KIAA0408</u>  | 1 | 1 | 0 | 1 | 0 | 0 | 1 | 0 | 0 | 1 | 5 |
| <u>CP110</u>     | 1 | 1 | 0 | 1 | 0 | 0 | 1 | 0 | 0 | 1 | 5 |
| <u>PCDHA9</u>    | 1 | 1 | 0 | 1 | 0 | 0 | 1 | 0 | 0 | 1 | 5 |
| <u>PCDHA9</u>    | 0 | 1 | 0 | 1 | 1 | 1 | 0 | 0 | 0 | 1 | 5 |
| <u>ZFYVE16</u>   | 1 | 0 | 1 | 1 | 0 | 0 | 1 | 0 | 0 | 1 | 5 |

|                 |   |   |   |   |   |   |   |   |   |   |   |
|-----------------|---|---|---|---|---|---|---|---|---|---|---|
| <u>RASSF2</u>   | 1 | 0 | 1 | 1 | 0 | 0 | 1 | 0 | 0 | 1 | 5 |
| <u>SERTAD2</u>  | 1 | 1 | 0 | 1 | 0 | 0 | 1 | 0 | 0 | 1 | 5 |
| <u>KIAA0494</u> | 1 | 1 | 0 | 1 | 0 | 0 | 1 | 0 | 0 | 1 | 5 |
| <u>GIT2</u>     | 1 | 1 | 0 | 1 | 0 | 0 | 1 | 0 | 0 | 1 | 5 |
| <u>SPATA2</u>   | 1 | 1 | 0 | 1 | 0 | 0 | 1 | 0 | 0 | 1 | 5 |
| <u>ZBTB24</u>   | 1 | 1 | 0 | 1 | 0 | 0 | 1 | 0 | 0 | 1 | 5 |
| <u>GAB2</u>     | 1 | 0 | 0 | 1 | 0 | 0 | 1 | 1 | 0 | 1 | 5 |
| <u>MFAP3L</u>   | 1 | 1 | 0 | 1 | 0 | 0 | 1 | 0 | 0 | 1 | 5 |
| <u>CEP350</u>   | 1 | 1 | 0 | 1 | 0 | 0 | 1 | 0 | 0 | 1 | 5 |
| <u>PJA2</u>     | 1 | 1 | 0 | 1 | 0 | 0 | 1 | 0 | 0 | 1 | 5 |
| <u>DDX46</u>    | 1 | 1 | 0 | 1 | 0 | 0 | 1 | 0 | 0 | 1 | 5 |
| <u>LBA1</u>     | 1 | 1 | 0 | 1 | 0 | 0 | 1 | 0 | 0 | 1 | 5 |
| <u>SMG7</u>     | 1 | 1 | 0 | 1 | 0 | 0 | 1 | 0 | 0 | 1 | 5 |
| <u>SV2A</u>     | 1 | 1 | 0 | 1 | 0 | 0 | 1 | 0 | 0 | 1 | 5 |
| <u>G3BP2</u>    | 1 | 0 | 0 | 1 | 1 | 1 | 0 | 0 | 0 | 1 | 5 |
| <u>G3BP2</u>    | 1 | 0 | 0 | 1 | 1 | 1 | 0 | 0 | 0 | 1 | 5 |
| <u>KBTBD11</u>  | 1 | 1 | 0 | 1 | 0 | 0 | 1 | 0 | 0 | 1 | 5 |
| <u>HELZ</u>     | 1 | 1 | 0 | 1 | 0 | 0 | 1 | 0 | 0 | 1 | 5 |
| <u>RBM8A</u>    | 1 | 1 | 0 | 1 | 0 | 0 | 1 | 0 | 0 | 1 | 5 |
| <u>HS3ST3A1</u> | 1 | 1 | 0 | 1 | 0 | 0 | 1 | 0 | 0 | 1 | 5 |
| <u>HS3ST2</u>   | 1 | 1 | 0 | 1 | 0 | 0 | 1 | 0 | 0 | 1 | 5 |
| <u>SLC23A2</u>  | 1 | 1 | 0 | 1 | 0 | 0 | 1 | 0 | 0 | 1 | 5 |
| <u>TNFSF15</u>  | 1 | 1 | 0 | 1 | 0 | 0 | 1 | 0 | 0 | 1 | 5 |
| <u>REC8</u>     | 1 | 1 | 0 | 1 | 0 | 0 | 1 | 0 | 0 | 1 | 5 |
| <u>ROD1</u>     | 1 | 0 | 1 | 1 | 0 | 0 | 1 | 0 | 0 | 1 | 5 |
| <u>DGCR2</u>    | 1 | 1 | 0 | 1 | 0 | 0 | 1 | 0 | 0 | 1 | 5 |
| <u>SFRS14</u>   | 1 | 1 | 1 | 0 | 0 | 0 | 1 | 0 | 0 | 1 | 5 |
| <u>ARL6IP5</u>  | 1 | 1 | 1 | 0 | 0 | 0 | 1 | 0 | 0 | 1 | 5 |
| <u>CTCF</u>     | 1 | 1 | 0 | 0 | 1 | 0 | 1 | 0 | 0 | 1 | 5 |
| <u>SEC24A</u>   | 1 | 1 | 1 | 0 | 0 | 0 | 1 | 0 | 0 | 1 | 5 |
| <u>OSBPL1A</u>  | 1 | 1 | 0 | 0 | 0 | 0 | 1 | 0 | 1 | 1 | 5 |
| <u>DIS3L</u>    | 1 | 0 | 0 | 0 | 0 | 0 | 1 | 1 | 1 | 1 | 5 |
| <u>ZNF441</u>   | 1 | 1 | 1 | 0 | 0 | 0 | 1 | 0 | 0 | 1 | 5 |
| <u>NLRP8</u>    | 1 | 1 | 0 | 0 | 0 | 0 | 1 | 1 | 0 | 1 | 5 |
| <u>ZFP28</u>    | 1 | 1 | 1 | 0 | 0 | 0 | 1 | 0 | 0 | 1 | 5 |
| <u>ZNF563</u>   | 1 | 1 | 1 | 0 | 0 | 0 | 1 | 0 | 0 | 1 | 5 |
| <u>ZNF558</u>   | 1 | 1 | 0 | 0 | 0 | 0 | 1 | 1 | 0 | 1 | 5 |
| <u>C5orf41</u>  | 1 | 1 | 1 | 0 | 0 | 0 | 1 | 0 | 0 | 1 | 5 |
| <u>TRDMT1</u>   | 1 | 1 | 1 | 0 | 0 | 0 | 1 | 0 | 0 | 1 | 5 |
| <u>ZNF626</u>   | 1 | 1 | 1 | 0 | 0 | 0 | 1 | 0 | 0 | 1 | 5 |
| <u>KIAA2018</u> | 1 | 1 | 0 | 0 | 0 | 0 | 1 | 0 | 1 | 1 | 5 |

|                 |   |   |   |   |   |   |   |   |   |   |   |
|-----------------|---|---|---|---|---|---|---|---|---|---|---|
| <u>SAMD9L</u>   | 1 | 1 | 1 | 0 | 0 | 0 | 1 | 0 | 0 | 1 | 5 |
| <u>PALLD</u>    | 1 | 1 | 0 | 0 | 1 | 0 | 1 | 0 | 0 | 1 | 5 |
| <u>TRIM2</u>    | 1 | 1 | 0 | 0 | 1 | 1 | 0 | 0 | 0 | 1 | 5 |
| <u>SLC7A11</u>  | 1 | 1 | 1 | 0 | 0 | 0 | 1 | 0 | 0 | 1 | 5 |
| <u>FUCA1</u>    | 1 | 1 | 1 | 0 | 0 | 0 | 1 | 0 | 0 | 1 | 5 |
| <u>ARMC8</u>    | 1 | 1 | 0 | 0 | 0 | 0 | 1 | 0 | 1 | 1 | 5 |
| <u>MRPL13</u>   | 1 | 1 | 1 | 0 | 0 | 0 | 1 | 0 | 0 | 1 | 5 |
| <u>HMBS</u>     | 1 | 1 | 0 | 0 | 0 | 0 | 1 | 0 | 1 | 1 | 5 |
| <u>FREM2</u>    | 1 | 1 | 0 | 0 | 0 | 0 | 1 | 1 | 0 | 1 | 5 |
| <u>ITGA2</u>    | 1 | 1 | 1 | 0 | 0 | 0 | 1 | 0 | 0 | 1 | 5 |
| <u>NFIB</u>     | 1 | 1 | 1 | 0 | 0 | 0 | 1 | 0 | 0 | 1 | 5 |
| <u>CDON</u>     | 1 | 1 | 1 | 0 | 0 | 0 | 1 | 0 | 0 | 1 | 5 |
| <u>TMED5</u>    | 1 | 1 | 0 | 0 | 1 | 0 | 1 | 0 | 0 | 1 | 5 |
| <u>KCTD3</u>    | 1 | 1 | 1 | 0 | 0 | 0 | 1 | 0 | 0 | 1 | 5 |
| <u>PDK4</u>     | 1 | 1 | 0 | 0 | 1 | 0 | 1 | 0 | 0 | 1 | 5 |
| <u>DDIT4</u>    | 1 | 1 | 1 | 0 | 0 | 0 | 1 | 0 | 0 | 1 | 5 |
| <u>PPP1CB</u>   | 1 | 0 | 0 | 0 | 1 | 1 | 1 | 0 | 0 | 1 | 5 |
| <u>MAGOHB</u>   | 1 | 1 | 1 | 0 | 0 | 0 | 1 | 0 | 0 | 1 | 5 |
| <u>LGI2</u>     | 1 | 1 | 1 | 0 | 0 | 0 | 1 | 0 | 0 | 1 | 5 |
| <u>DNAJA4</u>   | 1 | 1 | 1 | 0 | 0 | 0 | 1 | 0 | 0 | 1 | 5 |
| <u>ETNK1</u>    | 1 | 1 | 0 | 0 | 0 | 0 | 1 | 0 | 1 | 1 | 5 |
| <u>FAM46A</u>   | 1 | 1 | 0 | 0 | 0 | 0 | 1 | 1 | 0 | 1 | 5 |
| <u>NPAL3</u>    | 1 | 1 | 0 | 0 | 0 | 0 | 1 | 1 | 0 | 1 | 5 |
| <u>HEG1</u>     | 1 | 1 | 0 | 0 | 0 | 0 | 1 | 1 | 0 | 1 | 5 |
| <u>BCHE</u>     | 1 | 1 | 1 | 0 | 0 | 0 | 1 | 0 | 0 | 1 | 5 |
| <u>SFRS7</u>    | 1 | 1 | 1 | 0 | 0 | 0 | 1 | 0 | 0 | 1 | 5 |
| <u>CCDC14</u>   | 1 | 1 | 1 | 0 | 0 | 0 | 1 | 0 | 0 | 1 | 5 |
| <u>WNK1</u>     | 1 | 1 | 1 | 0 | 0 | 0 | 1 | 0 | 0 | 1 | 5 |
| <u>TAF5</u>     | 1 | 1 | 0 | 0 | 1 | 0 | 1 | 0 | 0 | 1 | 5 |
| <u>THBS4</u>    | 1 | 1 | 0 | 0 | 0 | 0 | 1 | 0 | 1 | 1 | 5 |
| <u>WHSC2</u>    | 1 | 1 | 1 | 0 | 0 | 0 | 1 | 0 | 0 | 1 | 5 |
| <u>ZNF74</u>    | 1 | 1 | 1 | 0 | 0 | 0 | 1 | 0 | 0 | 1 | 5 |
| <u>ZNF136</u>   | 1 | 1 | 1 | 0 | 0 | 0 | 1 | 0 | 0 | 1 | 5 |
| <u>ZNF140</u>   | 1 | 1 | 1 | 0 | 0 | 0 | 1 | 0 | 0 | 1 | 5 |
| <u>NARG1L</u>   | 1 | 1 | 0 | 0 | 0 | 0 | 1 | 0 | 1 | 1 | 5 |
| <u>C15orf29</u> | 1 | 1 | 1 | 0 | 0 | 0 | 1 | 0 | 0 | 1 | 5 |
| <u>ZNF606</u>   | 1 | 1 | 1 | 0 | 0 | 0 | 1 | 0 | 0 | 1 | 5 |
| <u>SGPP1</u>    | 1 | 1 | 0 | 0 | 1 | 0 | 1 | 0 | 0 | 1 | 5 |
| <u>B3GNT5</u>   | 1 | 1 | 1 | 0 | 0 | 0 | 1 | 0 | 0 | 1 | 5 |
| <u>ZNF644</u>   | 1 | 1 | 0 | 0 | 1 | 1 | 1 | 0 | 0 | 0 | 5 |
| <u>ZNF559</u>   | 1 | 1 | 1 | 0 | 0 | 0 | 1 | 0 | 0 | 1 | 5 |

|                 |   |   |   |   |   |   |   |   |   |   |   |
|-----------------|---|---|---|---|---|---|---|---|---|---|---|
| <u>RGS5</u>     | 1 | 1 | 1 | 0 | 0 | 0 | 1 | 0 | 0 | 1 | 5 |
| <u>C12orf34</u> | 1 | 1 | 0 | 0 | 1 | 1 | 1 | 0 | 0 | 0 | 5 |
| <u>STC2</u>     | 1 | 1 | 1 | 0 | 0 | 0 | 1 | 0 | 0 | 1 | 5 |
| <u>CCNB1</u>    | 1 | 1 | 1 | 0 | 0 | 0 | 1 | 0 | 0 | 1 | 5 |
| <u>REPS2</u>    | 1 | 1 | 1 | 0 | 0 | 0 | 1 | 0 | 0 | 1 | 5 |
| <u>SLC24A1</u>  | 1 | 1 | 1 | 0 | 0 | 0 | 1 | 0 | 0 | 1 | 5 |
| <u>CD163</u>    | 1 | 1 | 0 | 0 | 1 | 0 | 1 | 0 | 0 | 1 | 5 |
| <u>NRXN3</u>    | 1 | 1 | 0 | 0 | 1 | 0 | 1 | 0 | 0 | 1 | 5 |
| <u>ZNF592</u>   | 1 | 1 | 1 | 0 | 0 | 0 | 1 | 0 | 0 | 1 | 5 |
| <u>FAM53B</u>   | 1 | 1 | 0 | 0 | 0 | 0 | 1 | 1 | 0 | 1 | 5 |
| <u>HERPUD1</u>  | 1 | 1 | 0 | 0 | 1 | 1 | 1 | 0 | 0 | 0 | 5 |
| <u>DNAJC6</u>   | 1 | 1 | 0 | 0 | 0 | 0 | 1 | 1 | 0 | 1 | 5 |
| <u>JARID1A</u>  | 0 | 1 | 1 | 0 | 1 | 0 | 1 | 0 | 0 | 1 | 5 |
| <u>RGS2</u>     | 0 | 1 | 0 | 0 | 0 | 0 | 1 | 1 | 1 | 1 | 5 |
| <u>ABI1</u>     | 1 | 1 | 0 | 1 | 0 | 0 | 0 | 0 | 0 | 1 | 4 |
| <u>KCNE3</u>    | 1 | 1 | 0 | 1 | 0 | 0 | 0 | 0 | 0 | 1 | 4 |
| <u>ZBTB33</u>   | 1 | 1 | 0 | 1 | 0 | 0 | 0 | 0 | 0 | 1 | 4 |
| <u>BCL2L11</u>  | 1 | 0 | 0 | 1 | 1 | 0 | 0 | 0 | 0 | 1 | 4 |
| <u>SH2B3</u>    | 1 | 1 | 0 | 1 | 0 | 0 | 0 | 0 | 0 | 1 | 4 |
| <u>HMG2L1</u>   | 1 | 1 | 0 | 1 | 0 | 0 | 0 | 0 | 0 | 1 | 4 |
| <u>SH2D3C</u>   | 1 | 1 | 0 | 1 | 1 | 0 | 0 | 0 | 0 | 0 | 4 |
| <u>GJC1</u>     | 1 | 1 | 0 | 1 | 0 | 0 | 0 | 0 | 0 | 1 | 4 |
| <u>ACTR2</u>    | 1 | 1 | 0 | 1 | 0 | 0 | 0 | 0 | 0 | 1 | 4 |
| <u>CLEC3A</u>   | 1 | 1 | 0 | 1 | 0 | 0 | 0 | 0 | 0 | 1 | 4 |
| <u>FAM13A1</u>  | 1 | 1 | 0 | 1 | 0 | 0 | 0 | 0 | 0 | 1 | 4 |
| <u>SFRS14</u>   | 1 | 1 | 0 | 1 | 0 | 0 | 0 | 0 | 0 | 1 | 4 |
| <u>GPR64</u>    | 1 | 1 | 0 | 1 | 0 | 0 | 0 | 0 | 0 | 1 | 4 |
| <u>ABI2</u>     | 1 | 1 | 0 | 1 | 0 | 0 | 0 | 0 | 0 | 1 | 4 |
| <u>ZNF197</u>   | 1 | 1 | 0 | 1 | 0 | 0 | 0 | 0 | 0 | 1 | 4 |
| <u>CALCRL</u>   | 1 | 1 | 0 | 1 | 0 | 0 | 0 | 0 | 0 | 1 | 4 |
| <u>TRIM13</u>   | 1 | 0 | 0 | 1 | 1 | 1 | 0 | 0 | 0 | 0 | 4 |
| <u>TRIM13</u>   | 1 | 0 | 0 | 1 | 1 | 1 | 0 | 0 | 0 | 0 | 4 |
| <u>TRIM13</u>   | 1 | 0 | 0 | 1 | 1 | 1 | 0 | 0 | 0 | 0 | 4 |
| <u>INADL</u>    | 1 | 1 | 0 | 1 | 0 | 0 | 0 | 0 | 0 | 1 | 4 |
| <u>CTDSPL</u>   | 1 | 1 | 0 | 1 | 0 | 0 | 0 | 0 | 0 | 1 | 4 |
| <u>CDK8</u>     | 1 | 1 | 0 | 1 | 0 | 0 | 0 | 0 | 0 | 1 | 4 |
| <u>KCNMB2</u>   | 1 | 1 | 0 | 1 | 0 | 0 | 0 | 0 | 0 | 1 | 4 |
| <u>CDKN1B</u>   | 1 | 1 | 0 | 1 | 0 | 0 | 0 | 0 | 0 | 1 | 4 |
| <u>EFS</u>      | 1 | 1 | 0 | 1 | 0 | 0 | 0 | 0 | 0 | 1 | 4 |
| <u>PRSS16</u>   | 1 | 1 | 0 | 1 | 0 | 0 | 0 | 0 | 0 | 1 | 4 |
| <u>PAK4</u>     | 1 | 1 | 0 | 1 | 0 | 0 | 0 | 0 | 0 | 1 | 4 |

|                |   |   |   |   |   |   |   |   |   |   |   |
|----------------|---|---|---|---|---|---|---|---|---|---|---|
| <u>ADAR</u>    | 1 | 1 | 0 | 1 | 0 | 0 | 0 | 0 | 0 | 1 | 4 |
| <u>CDKN3</u>   | 1 | 1 | 0 | 1 | 0 | 0 | 0 | 0 | 0 | 1 | 4 |
| <u>PCGF3</u>   | 1 | 1 | 0 | 1 | 0 | 0 | 0 | 0 | 0 | 1 | 4 |
| <u>CDR2</u>    | 1 | 1 | 0 | 1 | 0 | 0 | 0 | 0 | 0 | 1 | 4 |
| <u>DLC1</u>    | 1 | 1 | 0 | 1 | 0 | 0 | 0 | 0 | 0 | 1 | 4 |
| <u>ATP8A1</u>  | 1 | 1 | 0 | 1 | 0 | 0 | 0 | 0 | 0 | 1 | 4 |
| <u>ADARB1</u>  | 1 | 0 | 0 | 1 | 1 | 0 | 0 | 0 | 0 | 1 | 4 |
| <u>PGRMC2</u>  | 1 | 1 | 0 | 1 | 0 | 0 | 0 | 0 | 0 | 1 | 4 |
| <u>TIMM17A</u> | 1 | 1 | 0 | 1 | 0 | 0 | 0 | 0 | 0 | 1 | 4 |
| <u>MERTK</u>   | 1 | 1 | 0 | 1 | 0 | 0 | 0 | 0 | 0 | 1 | 4 |
| <u>SLC9A6</u>  | 1 | 1 | 0 | 1 | 0 | 0 | 0 | 0 | 0 | 1 | 4 |
| <u>SLC9A6</u>  | 1 | 0 | 0 | 1 | 1 | 0 | 0 | 0 | 0 | 1 | 4 |
| <u>CRTAP</u>   | 1 | 1 | 0 | 1 | 0 | 0 | 0 | 0 | 0 | 1 | 4 |
| <u>ENOX2</u>   | 1 | 1 | 0 | 1 | 0 | 0 | 0 | 0 | 0 | 1 | 4 |
| <u>SEMA4F</u>  | 1 | 1 | 0 | 1 | 0 | 0 | 0 | 0 | 0 | 1 | 4 |
| <u>SEMA3C</u>  | 1 | 1 | 0 | 1 | 0 | 0 | 0 | 0 | 0 | 1 | 4 |
| <u>HYOU1</u>   | 1 | 1 | 0 | 1 | 0 | 0 | 0 | 0 | 0 | 1 | 4 |
| <u>NEBL</u>    | 1 | 1 | 0 | 1 | 0 | 0 | 0 | 0 | 0 | 1 | 4 |
| <u>CEBPG</u>   | 1 | 1 | 0 | 1 | 0 | 0 | 0 | 0 | 0 | 1 | 4 |
| <u>PROCR</u>   | 1 | 1 | 0 | 1 | 0 | 0 | 0 | 0 | 0 | 1 | 4 |
| <u>AGPAT1</u>  | 1 | 0 | 0 | 1 | 1 | 0 | 0 | 0 | 0 | 1 | 4 |
| <u>SPTLC1</u>  | 1 | 1 | 0 | 1 | 0 | 0 | 0 | 0 | 0 | 1 | 4 |
| <u>SPTLC1</u>  | 1 | 1 | 0 | 1 | 0 | 0 | 0 | 0 | 0 | 1 | 4 |
| <u>SLC19A2</u> | 1 | 1 | 0 | 1 | 0 | 0 | 0 | 0 | 0 | 1 | 4 |
| <u>MAB21L2</u> | 1 | 1 | 0 | 1 | 0 | 0 | 0 | 0 | 0 | 1 | 4 |
| <u>POLR3F</u>  | 1 | 1 | 0 | 1 | 0 | 0 | 0 | 0 | 0 | 1 | 4 |
| <u>POLR3G</u>  | 1 | 1 | 0 | 1 | 0 | 0 | 0 | 0 | 0 | 1 | 4 |
| <u>EXOC5</u>   | 1 | 1 | 0 | 1 | 0 | 0 | 0 | 0 | 0 | 1 | 4 |
| <u>MTX2</u>    | 1 | 1 | 0 | 1 | 0 | 0 | 0 | 0 | 0 | 1 | 4 |
| <u>CUGBP2</u>  | 1 | 1 | 0 | 1 | 0 | 0 | 0 | 0 | 0 | 1 | 4 |
| <u>RRAGA</u>   | 1 | 1 | 0 | 1 | 1 | 0 | 0 | 0 | 0 | 0 | 4 |
| <u>FUT9</u>    | 1 | 1 | 0 | 1 | 0 | 0 | 0 | 0 | 0 | 1 | 4 |
| <u>CETN3</u>   | 1 | 1 | 0 | 1 | 0 | 0 | 0 | 0 | 0 | 1 | 4 |
| <u>C1orf2</u>  | 1 | 0 | 0 | 1 | 1 | 0 | 0 | 0 | 0 | 1 | 4 |
| <u>POLQ</u>    | 1 | 1 | 0 | 1 | 0 | 0 | 0 | 0 | 0 | 1 | 4 |
| <u>NFAT5</u>   | 1 | 0 | 0 | 1 | 1 | 0 | 0 | 0 | 0 | 1 | 4 |
| <u>NFAT5</u>   | 1 | 0 | 0 | 1 | 1 | 0 | 0 | 0 | 0 | 1 | 4 |
| <u>NFAT5</u>   | 1 | 0 | 0 | 1 | 1 | 0 | 0 | 0 | 0 | 1 | 4 |
| <u>CFL2</u>    | 1 | 1 | 0 | 1 | 0 | 0 | 0 | 0 | 0 | 1 | 4 |
| <u>TCFL5</u>   | 1 | 1 | 0 | 1 | 0 | 0 | 0 | 0 | 0 | 1 | 4 |
| <u>NUP50</u>   | 1 | 1 | 0 | 1 | 0 | 0 | 0 | 0 | 0 | 1 | 4 |

|         |   |   |   |   |   |   |   |   |   |   |   |
|---------|---|---|---|---|---|---|---|---|---|---|---|
| JARID1B | 1 | 1 | 0 | 1 | 0 | 0 | 0 | 0 | 0 | 1 | 4 |
| HBS1L   | 1 | 1 | 0 | 1 | 0 | 0 | 0 | 0 | 0 | 1 | 4 |
| GJB6    | 1 | 1 | 0 | 1 | 0 | 0 | 0 | 0 | 0 | 1 | 4 |
| FRS2    | 1 | 1 | 0 | 1 | 0 | 0 | 0 | 0 | 0 | 1 | 4 |
| ADAM28  | 1 | 1 | 0 | 1 | 0 | 0 | 0 | 0 | 0 | 1 | 4 |
| NPFFR2  | 1 | 1 | 0 | 1 | 0 | 0 | 0 | 0 | 0 | 1 | 4 |
| GPR83   | 1 | 1 | 0 | 1 | 0 | 0 | 0 | 0 | 0 | 1 | 4 |
| MALT1   | 1 | 1 | 0 | 1 | 0 | 0 | 0 | 0 | 0 | 1 | 4 |
| BLCAP   | 1 | 1 | 0 | 1 | 0 | 0 | 0 | 0 | 0 | 1 | 4 |
| EDAR    | 1 | 1 | 0 | 1 | 0 | 0 | 0 | 0 | 0 | 1 | 4 |
| SPIN1   | 1 | 1 | 0 | 1 | 0 | 0 | 0 | 0 | 0 | 1 | 4 |
| PRDX3   | 1 | 1 | 0 | 1 | 0 | 0 | 0 | 0 | 0 | 1 | 4 |
| PNRC1   | 1 | 1 | 0 | 1 | 0 | 0 | 0 | 0 | 0 | 1 | 4 |
| RAB40B  | 1 | 1 | 0 | 1 | 0 | 0 | 0 | 0 | 0 | 1 | 4 |
| CKAP4   | 1 | 1 | 0 | 1 | 0 | 0 | 0 | 0 | 0 | 1 | 4 |
| TMED10  | 1 | 1 | 0 | 1 | 0 | 0 | 0 | 0 | 0 | 1 | 4 |
| METAP2  | 1 | 1 | 0 | 1 | 0 | 0 | 0 | 0 | 0 | 1 | 4 |
| KIF2C   | 1 | 1 | 0 | 1 | 0 | 0 | 0 | 0 | 0 | 1 | 4 |
| TLK2    | 1 | 1 | 0 | 1 | 0 | 0 | 0 | 0 | 0 | 1 | 4 |
| KDELR2  | 1 | 1 | 0 | 1 | 0 | 0 | 0 | 0 | 0 | 1 | 4 |
| KDELR2  | 1 | 1 | 0 | 1 | 0 | 0 | 0 | 0 | 0 | 1 | 4 |
| KDELR3  | 1 | 1 | 0 | 1 | 0 | 0 | 0 | 0 | 0 | 1 | 4 |
| RCBTB2  | 1 | 1 | 0 | 1 | 0 | 0 | 0 | 0 | 0 | 1 | 4 |
| POLS    | 1 | 1 | 0 | 1 | 0 | 0 | 0 | 0 | 0 | 1 | 4 |
| NUDT21  | 1 | 1 | 0 | 1 | 0 | 0 | 0 | 0 | 0 | 1 | 4 |
| DDX52   | 1 | 1 | 0 | 1 | 0 | 0 | 0 | 0 | 0 | 1 | 4 |
| RAPGEF4 | 1 | 1 | 0 | 1 | 0 | 0 | 0 | 0 | 0 | 1 | 4 |
| TOPBP1  | 1 | 1 | 0 | 1 | 0 | 0 | 0 | 0 | 0 | 1 | 4 |
| TPPP    | 1 | 1 | 0 | 1 | 0 | 0 | 0 | 0 | 0 | 1 | 4 |
| DIDO1   | 1 | 1 | 0 | 1 | 0 | 0 | 0 | 0 | 0 | 1 | 4 |
| ADAMTS8 | 1 | 1 | 0 | 1 | 0 | 0 | 0 | 0 | 0 | 1 | 4 |
| ADAMTS5 | 1 | 1 | 0 | 1 | 0 | 0 | 0 | 0 | 0 | 1 | 4 |
| PRDM4   | 1 | 1 | 0 | 1 | 0 | 0 | 0 | 0 | 0 | 1 | 4 |
| CIT     | 1 | 1 | 0 | 1 | 0 | 0 | 0 | 0 | 0 | 1 | 4 |
| PTPRT   | 1 | 1 | 0 | 1 | 0 | 0 | 0 | 0 | 0 | 1 | 4 |
| KIF3A   | 1 | 1 | 0 | 1 | 0 | 0 | 0 | 0 | 0 | 1 | 4 |
| AP4S1   | 1 | 1 | 0 | 1 | 1 | 0 | 0 | 0 | 0 | 0 | 4 |
| ERLIN2  | 1 | 1 | 0 | 1 | 0 | 0 | 0 | 0 | 0 | 1 | 4 |
| NUDT4   | 1 | 1 | 0 | 1 | 0 | 0 | 0 | 0 | 0 | 1 | 4 |
| FSTL1   | 1 | 1 | 0 | 1 | 0 | 0 | 0 | 0 | 0 | 1 | 4 |
| PSIP1   | 1 | 1 | 0 | 1 | 0 | 0 | 0 | 0 | 0 | 1 | 4 |



|                  |   |   |   |   |   |   |   |   |   |   |   |
|------------------|---|---|---|---|---|---|---|---|---|---|---|
| <u>FAM107A</u>   | 1 | 1 | 0 | 1 | 0 | 0 | 0 | 0 | 0 | 1 | 4 |
| <u>ZNF277</u>    | 1 | 1 | 0 | 1 | 0 | 0 | 0 | 0 | 0 | 1 | 4 |
| <u>CHKA</u>      | 1 | 1 | 0 | 1 | 0 | 0 | 0 | 0 | 0 | 1 | 4 |
| <u>WIF1</u>      | 1 | 1 | 0 | 1 | 0 | 0 | 0 | 0 | 0 | 1 | 4 |
| <u>DDX20</u>     | 1 | 1 | 0 | 1 | 0 | 0 | 0 | 0 | 0 | 1 | 4 |
| <u>CHML</u>      | 1 | 1 | 0 | 1 | 0 | 0 | 0 | 0 | 0 | 1 | 4 |
| <u>HPS5</u>      | 1 | 1 | 0 | 1 | 0 | 0 | 0 | 0 | 0 | 1 | 4 |
| <u>CA5B</u>      | 1 | 1 | 0 | 1 | 0 | 0 | 0 | 0 | 0 | 1 | 4 |
| <u>C14orf126</u> | 1 | 1 | 0 | 1 | 0 | 0 | 0 | 0 | 0 | 1 | 4 |
| <u>C6orf117</u>  | 1 | 1 | 0 | 1 | 0 | 0 | 0 | 0 | 0 | 1 | 4 |
| <u>CHP</u>       | 1 | 1 | 0 | 1 | 0 | 0 | 0 | 0 | 0 | 1 | 4 |
| <u>KLF12</u>     | 1 | 1 | 0 | 1 | 0 | 0 | 0 | 0 | 0 | 1 | 4 |
| <u>BTBD14B</u>   | 1 | 1 | 0 | 1 | 0 | 0 | 0 | 0 | 0 | 1 | 4 |
| <u>ADCY7</u>     | 1 | 1 | 0 | 1 | 0 | 0 | 0 | 0 | 0 | 1 | 4 |
| <u>LYPLA2</u>    | 1 | 1 | 0 | 1 | 0 | 0 | 0 | 0 | 0 | 1 | 4 |
| <u>MGAT4A</u>    | 1 | 1 | 0 | 1 | 0 | 0 | 0 | 0 | 0 | 1 | 4 |
| <u>SLC46A1</u>   | 1 | 1 | 0 | 1 | 0 | 0 | 0 | 0 | 0 | 1 | 4 |
| <u>LARP4</u>     | 1 | 1 | 0 | 1 | 0 | 0 | 0 | 0 | 0 | 1 | 4 |
| <u>TMEM106A</u>  | 1 | 1 | 0 | 1 | 0 | 0 | 0 | 0 | 0 | 1 | 4 |
| <u>PDAP1</u>     | 1 | 1 | 0 | 1 | 0 | 0 | 0 | 0 | 0 | 1 | 4 |
| <u>SFT2D1</u>    | 1 | 1 | 0 | 1 | 0 | 0 | 0 | 0 | 0 | 1 | 4 |
| <u>RNF13</u>     | 1 | 1 | 0 | 1 | 0 | 0 | 0 | 0 | 0 | 1 | 4 |
| <u>TRIM9</u>     | 1 | 1 | 0 | 1 | 0 | 0 | 0 | 0 | 0 | 1 | 4 |
| <u>CHRNA2</u>    | 1 | 1 | 0 | 1 | 0 | 0 | 0 | 0 | 0 | 1 | 4 |
| <u>MAL2</u>      | 1 | 1 | 0 | 1 | 0 | 0 | 0 | 0 | 0 | 1 | 4 |
| <u>ERMAP</u>     | 1 | 1 | 0 | 1 | 0 | 0 | 0 | 0 | 0 | 1 | 4 |
| <u>GPRIN1</u>    | 1 | 1 | 0 | 1 | 0 | 0 | 0 | 0 | 0 | 1 | 4 |
| <u>SLC25A25</u>  | 1 | 1 | 0 | 1 | 0 | 0 | 0 | 0 | 0 | 1 | 4 |
| <u>FMNL2</u>     | 1 | 1 | 0 | 1 | 0 | 0 | 0 | 0 | 0 | 1 | 4 |
| <u>TMEM132B</u>  | 1 | 1 | 0 | 1 | 0 | 0 | 0 | 0 | 0 | 1 | 4 |
| <u>CCDC85A</u>   | 1 | 1 | 0 | 1 | 0 | 0 | 0 | 0 | 0 | 1 | 4 |
| <u>SORCS1</u>    | 1 | 1 | 0 | 1 | 0 | 0 | 0 | 0 | 0 | 1 | 4 |
| <u>SORCS1</u>    | 1 | 1 | 0 | 1 | 0 | 0 | 0 | 0 | 0 | 1 | 4 |
| <u>OSBPL8</u>    | 1 | 0 | 0 | 1 | 1 | 0 | 0 | 0 | 0 | 1 | 4 |
| <u>OSBPL11</u>   | 1 | 1 | 0 | 1 | 0 | 0 | 0 | 0 | 0 | 1 | 4 |
| <u>C1QTNF7</u>   | 1 | 1 | 0 | 1 | 0 | 0 | 0 | 0 | 0 | 1 | 4 |
| <u>TMEM123</u>   | 1 | 1 | 0 | 1 | 0 | 0 | 0 | 0 | 0 | 1 | 4 |
| <u>SLC26A9</u>   | 1 | 1 | 0 | 1 | 0 | 0 | 0 | 0 | 0 | 1 | 4 |
| <u>SLC26A7</u>   | 1 | 1 | 0 | 1 | 0 | 0 | 0 | 0 | 0 | 1 | 4 |
| <u>KCTD12</u>    | 1 | 1 | 0 | 1 | 0 | 0 | 0 | 0 | 0 | 1 | 4 |
| <u>CISH</u>      | 1 | 1 | 0 | 1 | 0 | 0 | 0 | 0 | 0 | 1 | 4 |

|                  |   |   |   |   |   |   |   |   |   |   |   |
|------------------|---|---|---|---|---|---|---|---|---|---|---|
| <u>RASGRP4</u>   | 1 | 1 | 0 | 1 | 0 | 0 | 0 | 0 | 0 | 1 | 4 |
| <u>C12orf56</u>  | 1 | 1 | 0 | 1 | 0 | 0 | 0 | 0 | 0 | 1 | 4 |
| <u>ARL11</u>     | 1 | 1 | 0 | 1 | 0 | 0 | 0 | 0 | 0 | 1 | 4 |
| <u>C16orf75</u>  | 1 | 1 | 0 | 1 | 0 | 0 | 0 | 0 | 0 | 1 | 4 |
| <u>LYSMD3</u>    | 1 | 1 | 0 | 1 | 0 | 0 | 0 | 0 | 0 | 1 | 4 |
| <u>LOC116236</u> | 1 | 1 | 0 | 1 | 0 | 0 | 0 | 0 | 0 | 1 | 4 |
| <u>IL22RA2</u>   | 1 | 1 | 0 | 1 | 0 | 0 | 0 | 0 | 0 | 1 | 4 |
| <u>RAB39B</u>    | 1 | 1 | 0 | 1 | 0 | 0 | 0 | 0 | 0 | 1 | 4 |
| <u>C6orf192</u>  | 1 | 1 | 0 | 1 | 0 | 0 | 0 | 0 | 0 | 1 | 4 |
| <u>CENTD1</u>    | 1 | 1 | 0 | 1 | 0 | 0 | 0 | 0 | 0 | 1 | 4 |
| <u>TADA1L</u>    | 1 | 1 | 0 | 1 | 0 | 0 | 0 | 0 | 0 | 1 | 4 |
| <u>MIA2</u>      | 1 | 1 | 0 | 1 | 0 | 0 | 0 | 0 | 0 | 1 | 4 |
| <u>SH2D1B</u>    | 1 | 1 | 0 | 1 | 0 | 0 | 0 | 0 | 0 | 1 | 4 |
| <u>RAB3IP</u>    | 1 | 1 | 0 | 1 | 0 | 0 | 0 | 0 | 0 | 1 | 4 |
| <u>RAB3IP</u>    | 1 | 1 | 0 | 1 | 0 | 0 | 0 | 0 | 0 | 1 | 4 |
| <u>ADD1</u>      | 1 | 1 | 0 | 1 | 0 | 0 | 0 | 0 | 0 | 1 | 4 |
| <u>CLCN5</u>     | 1 | 1 | 0 | 1 | 0 | 0 | 0 | 0 | 0 | 1 | 4 |
| <u>CLCN6</u>     | 1 | 1 | 0 | 1 | 0 | 0 | 0 | 0 | 0 | 1 | 4 |
| <u>C10orf83</u>  | 1 | 1 | 0 | 1 | 0 | 0 | 0 | 0 | 0 | 1 | 4 |
| <u>ZFYVE27</u>   | 1 | 1 | 0 | 1 | 0 | 0 | 0 | 0 | 0 | 1 | 4 |
| <u>C10orf4</u>   | 1 | 1 | 0 | 1 | 0 | 0 | 0 | 0 | 0 | 1 | 4 |
| <u>C10orf78</u>  | 1 | 0 | 0 | 1 | 1 | 0 | 0 | 0 | 0 | 1 | 4 |
| <u>C10orf104</u> | 1 | 1 | 0 | 1 | 0 | 0 | 0 | 0 | 0 | 1 | 4 |
| <u>TPP1</u>      | 1 | 1 | 0 | 1 | 0 | 0 | 0 | 0 | 0 | 1 | 4 |
| <u>FAT3</u>      | 1 | 1 | 0 | 1 | 0 | 0 | 0 | 0 | 0 | 1 | 4 |
| <u>LRRK2</u>     | 1 | 1 | 0 | 1 | 0 | 0 | 0 | 0 | 0 | 1 | 4 |
| <u>IKIP</u>      | 1 | 1 | 0 | 1 | 0 | 0 | 0 | 0 | 0 | 1 | 4 |
| <u>BTBD11</u>    | 1 | 1 | 0 | 1 | 0 | 0 | 0 | 0 | 0 | 1 | 4 |
| <u>SLAIN1</u>    | 1 | 0 | 0 | 1 | 1 | 1 | 0 | 0 | 0 | 0 | 4 |
| <u>C14orf28</u>  | 1 | 1 | 0 | 1 | 0 | 0 | 0 | 0 | 0 | 1 | 4 |
| <u>TRAPPC6B</u>  | 1 | 1 | 0 | 1 | 0 | 0 | 0 | 0 | 0 | 1 | 4 |
| <u>SOCS4</u>     | 1 | 1 | 0 | 1 | 0 | 0 | 0 | 0 | 0 | 1 | 4 |
| <u>JUNDM2</u>    | 1 | 0 | 0 | 1 | 1 | 0 | 0 | 0 | 0 | 1 | 4 |
| <u>SLC24A4</u>   | 1 | 1 | 0 | 1 | 0 | 0 | 0 | 0 | 0 | 1 | 4 |
| <u>CCR3</u>      | 1 | 1 | 0 | 1 | 0 | 0 | 0 | 0 | 0 | 1 | 4 |
| <u>NIPA1</u>     | 1 | 1 | 0 | 1 | 0 | 0 | 0 | 0 | 0 | 1 | 4 |
| <u>WHDC1</u>     | 1 | 1 | 0 | 1 | 0 | 0 | 0 | 0 | 0 | 1 | 4 |
| <u>MSI2</u>      | 1 | 1 | 0 | 1 | 0 | 0 | 0 | 0 | 0 | 1 | 4 |
| <u>CD300LB</u>   | 1 | 1 | 0 | 1 | 0 | 0 | 0 | 0 | 0 | 1 | 4 |
| <u>ZNF491</u>    | 1 | 1 | 0 | 1 | 0 | 0 | 0 | 0 | 0 | 1 | 4 |
| <u>ZNF440</u>    | 1 | 1 | 0 | 1 | 0 | 0 | 0 | 0 | 0 | 1 | 4 |

|                 |   |   |   |   |   |   |   |   |   |   |   |
|-----------------|---|---|---|---|---|---|---|---|---|---|---|
| <u>ZNF792</u>   | 1 | 1 | 0 | 1 | 0 | 0 | 0 | 0 | 0 | 1 | 4 |
| <u>ANKLE1</u>   | 1 | 1 | 0 | 1 | 0 | 0 | 0 | 0 | 0 | 1 | 4 |
| <u>SHE</u>      | 1 | 1 | 0 | 1 | 0 | 0 | 0 | 0 | 0 | 1 | 4 |
| <u>C1orf96</u>  | 1 | 1 | 0 | 1 | 0 | 0 | 0 | 0 | 0 | 1 | 4 |
| <u>C1orf161</u> | 1 | 1 | 0 | 1 | 0 | 0 | 0 | 0 | 0 | 1 | 4 |
| <u>ADH4</u>     | 1 | 1 | 0 | 1 | 0 | 0 | 0 | 0 | 0 | 1 | 4 |
| <u>C1orf93</u>  | 1 | 1 | 0 | 1 | 0 | 0 | 0 | 0 | 0 | 1 | 4 |
| <u>C1orf83</u>  | 1 | 1 | 0 | 1 | 0 | 0 | 0 | 0 | 0 | 1 | 4 |
| <u>UBXD3</u>    | 1 | 1 | 0 | 1 | 0 | 0 | 0 | 0 | 0 | 1 | 4 |
| <u>UHMK1</u>    | 1 | 1 | 0 | 1 | 0 | 0 | 0 | 0 | 0 | 1 | 4 |
| <u>C1orf131</u> | 1 | 1 | 0 | 1 | 0 | 0 | 0 | 0 | 0 | 1 | 4 |
| <u>KLF17</u>    | 1 | 1 | 0 | 1 | 0 | 0 | 0 | 0 | 0 | 1 | 4 |
| <u>COL5A1</u>   | 1 | 1 | 0 | 1 | 0 | 0 | 0 | 0 | 0 | 1 | 4 |
| <u>C22orf25</u> | 1 | 1 | 0 | 1 | 0 | 0 | 0 | 0 | 0 | 1 | 4 |
| <u>COL6A3</u>   | 1 | 1 | 0 | 1 | 0 | 0 | 0 | 0 | 0 | 1 | 4 |
| <u>C2orf60</u>  | 1 | 1 | 0 | 1 | 0 | 0 | 0 | 0 | 0 | 1 | 4 |
| <u>CMPK2</u>    | 1 | 1 | 0 | 1 | 0 | 0 | 0 | 0 | 0 | 1 | 4 |
| <u>TMEM18</u>   | 1 | 1 | 0 | 1 | 0 | 0 | 0 | 0 | 0 | 1 | 4 |
| <u>FLJ40298</u> | 1 | 1 | 0 | 1 | 0 | 0 | 0 | 0 | 0 | 1 | 4 |
| <u>ACMSD</u>    | 1 | 1 | 0 | 1 | 0 | 0 | 0 | 0 | 0 | 1 | 4 |
| <u>RFTN2</u>    | 1 | 1 | 0 | 1 | 0 | 0 | 0 | 0 | 0 | 1 | 4 |
| <u>AP1S3</u>    | 1 | 1 | 0 | 1 | 0 | 0 | 0 | 0 | 0 | 1 | 4 |
| <u>ACVR1C</u>   | 1 | 1 | 0 | 1 | 0 | 0 | 0 | 0 | 0 | 1 | 4 |
| <u>UBR3</u>     | 1 | 1 | 0 | 1 | 1 | 0 | 0 | 0 | 0 | 0 | 4 |
| <u>ALS2CR12</u> | 1 | 1 | 0 | 1 | 0 | 0 | 0 | 0 | 0 | 1 | 4 |
| <u>MDH1B</u>    | 1 | 1 | 0 | 1 | 0 | 0 | 0 | 0 | 0 | 1 | 4 |
| <u>COL19A1</u>  | 1 | 1 | 0 | 1 | 0 | 0 | 0 | 0 | 0 | 1 | 4 |
| <u>CPNE4</u>    | 1 | 1 | 0 | 1 | 0 | 0 | 0 | 0 | 0 | 1 | 4 |
| <u>KCNH8</u>    | 1 | 1 | 0 | 1 | 0 | 0 | 0 | 0 | 0 | 1 | 4 |
| <u>CD200R1</u>  | 1 | 1 | 0 | 1 | 0 | 0 | 0 | 0 | 0 | 1 | 4 |
| <u>DCBLD2</u>   | 1 | 1 | 0 | 1 | 0 | 0 | 0 | 0 | 0 | 1 | 4 |
| <u>FAM43A</u>   | 1 | 1 | 0 | 1 | 0 | 0 | 0 | 0 | 0 | 1 | 4 |
| <u>SLC31A1</u>  | 1 | 1 | 0 | 1 | 1 | 0 | 0 | 0 | 0 | 0 | 4 |
| <u>TMEM207</u>  | 1 | 1 | 0 | 1 | 0 | 0 | 0 | 0 | 0 | 1 | 4 |
| <u>SYNPR</u>    | 1 | 1 | 0 | 1 | 0 | 0 | 0 | 0 | 0 | 1 | 4 |
| <u>SYNPR</u>    | 1 | 0 | 0 | 1 | 1 | 0 | 0 | 0 | 0 | 1 | 4 |
| <u>MAP3K8</u>   | 1 | 1 | 0 | 1 | 0 | 0 | 0 | 0 | 0 | 1 | 4 |
| <u>SPATA18</u>  | 1 | 1 | 0 | 1 | 0 | 0 | 0 | 0 | 0 | 1 | 4 |
| <u>PRRC1</u>    | 1 | 1 | 0 | 1 | 0 | 0 | 0 | 0 | 0 | 1 | 4 |
| <u>C5orf33</u>  | 1 | 1 | 0 | 1 | 0 | 0 | 0 | 0 | 0 | 1 | 4 |
| <u>DNAJC21</u>  | 1 | 1 | 0 | 1 | 0 | 0 | 0 | 0 | 0 | 1 | 4 |

|                  |   |   |   |   |   |   |   |   |   |   |   |
|------------------|---|---|---|---|---|---|---|---|---|---|---|
| <u>DNAJC21</u>   | 1 | 0 | 0 | 1 | 1 | 0 | 0 | 0 | 0 | 1 | 4 |
| <u>WDR36</u>     | 1 | 1 | 0 | 1 | 0 | 0 | 0 | 0 | 0 | 1 | 4 |
| <u>NCOA7</u>     | 1 | 1 | 0 | 1 | 0 | 0 | 0 | 0 | 0 | 1 | 4 |
| <u>HINT3</u>     | 1 | 1 | 0 | 1 | 0 | 0 | 0 | 0 | 0 | 1 | 4 |
| <u>CD109</u>     | 1 | 1 | 0 | 1 | 0 | 0 | 0 | 0 | 0 | 1 | 4 |
| <u>COX11</u>     | 1 | 1 | 0 | 1 | 0 | 0 | 0 | 0 | 0 | 1 | 4 |
| <u>C7orf57</u>   | 1 | 1 | 0 | 1 | 0 | 0 | 0 | 0 | 0 | 1 | 4 |
| <u>CPOX</u>      | 1 | 1 | 0 | 1 | 0 | 0 | 0 | 0 | 0 | 1 | 4 |
| <u>TMEM71</u>    | 1 | 1 | 0 | 1 | 0 | 0 | 0 | 0 | 0 | 1 | 4 |
| <u>LOC137886</u> | 1 | 1 | 0 | 1 | 0 | 0 | 0 | 0 | 0 | 1 | 4 |
| <u>PTPDC1</u>    | 1 | 1 | 0 | 1 | 0 | 0 | 0 | 0 | 0 | 1 | 4 |
| <u>C9orf23</u>   | 1 | 1 | 0 | 1 | 0 | 0 | 0 | 0 | 0 | 1 | 4 |
| <u>CREBL2</u>    | 1 | 1 | 0 | 1 | 0 | 0 | 0 | 0 | 0 | 1 | 4 |
| <u>WDR40B</u>    | 1 | 1 | 0 | 1 | 0 | 0 | 0 | 0 | 0 | 1 | 4 |
| <u>CRH</u>       | 1 | 1 | 0 | 1 | 0 | 0 | 0 | 0 | 0 | 1 | 4 |
| <u>FAM123B</u>   | 1 | 1 | 0 | 1 | 0 | 0 | 0 | 0 | 0 | 1 | 4 |
| <u>CRKL</u>      | 1 | 1 | 0 | 1 | 0 | 0 | 0 | 0 | 0 | 1 | 4 |
| <u>ASB5</u>      | 1 | 1 | 0 | 1 | 0 | 0 | 0 | 0 | 0 | 1 | 4 |
| <u>CRY2</u>      | 1 | 1 | 0 | 1 | 0 | 0 | 0 | 0 | 0 | 1 | 4 |
| <u>ZNF280B</u>   | 1 | 1 | 0 | 1 | 0 | 0 | 0 | 0 | 0 | 1 | 4 |
| <u>PABPC5</u>    | 1 | 1 | 0 | 1 | 0 | 0 | 0 | 0 | 0 | 1 | 4 |
| <u>ADPRH</u>     | 1 | 1 | 0 | 1 | 0 | 0 | 0 | 0 | 0 | 1 | 4 |
| <u>MPP7</u>      | 1 | 1 | 0 | 1 | 0 | 0 | 0 | 0 | 0 | 1 | 4 |
| <u>VTI1A</u>     | 1 | 1 | 0 | 1 | 0 | 0 | 0 | 0 | 0 | 1 | 4 |
| <u>C10orf46</u>  | 1 | 1 | 0 | 1 | 0 | 0 | 0 | 0 | 0 | 1 | 4 |
| <u>XRRA1</u>     | 1 | 1 | 0 | 1 | 0 | 0 | 0 | 0 | 0 | 1 | 4 |
| <u>FAM76B</u>    | 1 | 1 | 0 | 1 | 0 | 0 | 0 | 0 | 0 | 1 | 4 |
| <u>SPTY2D1</u>   | 1 | 1 | 0 | 1 | 0 | 0 | 0 | 0 | 0 | 1 | 4 |
| <u>TMEM86A</u>   | 1 | 1 | 0 | 1 | 0 | 0 | 0 | 0 | 0 | 1 | 4 |
| <u>FLJ32549</u>  | 1 | 1 | 0 | 1 | 0 | 0 | 0 | 0 | 0 | 1 | 4 |
| <u>C13orf30</u>  | 1 | 1 | 0 | 1 | 0 | 0 | 0 | 0 | 0 | 1 | 4 |
| <u>PRIMA1</u>    | 1 | 1 | 0 | 1 | 0 | 0 | 0 | 0 | 0 | 1 | 4 |
| <u>CSNK2A2</u>   | 1 | 1 | 0 | 1 | 0 | 0 | 0 | 0 | 0 | 1 | 4 |
| <u>CMTM4</u>     | 1 | 1 | 0 | 1 | 0 | 0 | 0 | 0 | 0 | 1 | 4 |
| <u>GSG1L</u>     | 1 | 1 | 0 | 1 | 0 | 0 | 0 | 0 | 0 | 1 | 4 |
| <u>CCDC42</u>    | 1 | 1 | 0 | 1 | 0 | 0 | 0 | 0 | 0 | 1 | 4 |
| <u>SLFN13</u>    | 1 | 1 | 0 | 1 | 0 | 0 | 0 | 0 | 0 | 1 | 4 |
| <u>AMAC1</u>     | 1 | 1 | 0 | 1 | 0 | 0 | 0 | 0 | 0 | 1 | 4 |
| <u>C18orf25</u>  | 1 | 1 | 0 | 1 | 0 | 0 | 0 | 0 | 0 | 1 | 4 |
| <u>ZNF418</u>    | 1 | 1 | 0 | 1 | 0 | 0 | 0 | 0 | 0 | 1 | 4 |
| <u>ZNF417</u>    | 1 | 1 | 0 | 1 | 0 | 0 | 0 | 0 | 0 | 1 | 4 |

|           |   |   |   |   |   |   |   |   |   |   |   |
|-----------|---|---|---|---|---|---|---|---|---|---|---|
| ZNF420    | 1 | 1 | 0 | 1 | 0 | 0 | 0 | 0 | 0 | 1 | 4 |
| C19orf25  | 1 | 1 | 0 | 1 | 0 | 0 | 0 | 0 | 0 | 1 | 4 |
| ZNF569    | 1 | 1 | 0 | 1 | 0 | 0 | 0 | 0 | 0 | 1 | 4 |
| C1orf52   | 1 | 1 | 0 | 1 | 0 | 0 | 0 | 0 | 0 | 1 | 4 |
| CTGF      | 1 | 1 | 0 | 1 | 0 | 0 | 0 | 0 | 0 | 1 | 4 |
| EXOC8     | 1 | 1 | 0 | 1 | 0 | 0 | 0 | 0 | 0 | 1 | 4 |
| PDIK1L    | 1 | 1 | 0 | 1 | 0 | 0 | 0 | 0 | 0 | 1 | 4 |
| BNIP1     | 1 | 1 | 0 | 1 | 0 | 0 | 0 | 0 | 0 | 1 | 4 |
| CTNNA1    | 1 | 1 | 0 | 1 | 0 | 0 | 0 | 0 | 0 | 1 | 4 |
| CTNND1    | 1 | 1 | 0 | 1 | 0 | 0 | 0 | 0 | 0 | 1 | 4 |
| CCT8L2    | 1 | 1 | 0 | 1 | 0 | 0 | 0 | 0 | 0 | 1 | 4 |
| CCDC117   | 1 | 1 | 0 | 1 | 0 | 0 | 0 | 0 | 0 | 1 | 4 |
| PROM2     | 1 | 1 | 0 | 1 | 0 | 0 | 0 | 0 | 0 | 1 | 4 |
| ZNF385B   | 1 | 1 | 0 | 1 | 1 | 0 | 0 | 0 | 0 | 0 | 4 |
| FAM84A    | 1 | 1 | 0 | 1 | 0 | 0 | 0 | 0 | 0 | 1 | 4 |
| GPR155    | 1 | 1 | 0 | 1 | 0 | 0 | 0 | 0 | 0 | 1 | 4 |
| TTC14     | 1 | 1 | 0 | 1 | 0 | 0 | 0 | 0 | 0 | 1 | 4 |
| TTC14     | 1 | 1 | 0 | 1 | 0 | 0 | 0 | 0 | 0 | 1 | 4 |
| CTSO      | 1 | 1 | 0 | 1 | 0 | 0 | 0 | 0 | 0 | 1 | 4 |
| RNF38     | 1 | 1 | 0 | 1 | 0 | 0 | 0 | 0 | 0 | 1 | 4 |
| IGSF11    | 1 | 1 | 0 | 1 | 0 | 0 | 0 | 0 | 0 | 1 | 4 |
| CCDC100   | 1 | 1 | 0 | 1 | 0 | 0 | 0 | 0 | 0 | 1 | 4 |
| LOC153364 | 1 | 1 | 0 | 1 | 0 | 0 | 0 | 0 | 0 | 1 | 4 |
| SRFBP1    | 1 | 1 | 0 | 1 | 0 | 0 | 0 | 0 | 0 | 1 | 4 |
| PLEKHG4B  | 1 | 1 | 0 | 1 | 0 | 0 | 0 | 0 | 0 | 1 | 4 |
| CYLD      | 1 | 1 | 0 | 1 | 0 | 0 | 0 | 0 | 0 | 1 | 4 |
| C6orf151  | 1 | 1 | 0 | 1 | 0 | 0 | 0 | 0 | 0 | 1 | 4 |
| CNKS3     | 1 | 1 | 0 | 1 | 0 | 0 | 0 | 0 | 0 | 1 | 4 |
| MBOAT1    | 1 | 1 | 0 | 1 | 0 | 0 | 0 | 0 | 0 | 1 | 4 |
| NKAIN2    | 1 | 1 | 0 | 1 | 0 | 0 | 0 | 0 | 0 | 1 | 4 |
| ABCA13    | 1 | 1 | 0 | 1 | 0 | 0 | 0 | 0 | 0 | 1 | 4 |
| FLJ31818  | 1 | 1 | 0 | 1 | 0 | 0 | 0 | 0 | 0 | 1 | 4 |
| RBM33     | 1 | 1 | 0 | 1 | 0 | 0 | 0 | 0 | 0 | 1 | 4 |
| CYP2C8    | 1 | 1 | 0 | 1 | 0 | 0 | 0 | 0 | 0 | 1 | 4 |
| ADRBK1    | 1 | 1 | 0 | 1 | 0 | 0 | 0 | 0 | 0 | 1 | 4 |
| ADRBK2    | 1 | 1 | 0 | 1 | 0 | 0 | 0 | 0 | 0 | 1 | 4 |
| ESCO2     | 1 | 1 | 0 | 1 | 0 | 0 | 0 | 0 | 0 | 1 | 4 |
| VPS13B    | 1 | 1 | 0 | 1 | 0 | 0 | 0 | 0 | 0 | 1 | 4 |
| RLBP1L1   | 1 | 1 | 0 | 1 | 0 | 0 | 0 | 0 | 0 | 1 | 4 |
| CYP7A1    | 1 | 1 | 0 | 1 | 0 | 0 | 0 | 0 | 0 | 1 | 4 |
| FAM120AOS | 1 | 1 | 0 | 1 | 0 | 0 | 0 | 0 | 0 | 1 | 4 |

|          |   |   |   |   |   |   |   |   |   |   |   |
|----------|---|---|---|---|---|---|---|---|---|---|---|
| ZNF483   | 1 | 1 | 0 | 1 | 0 | 0 | 0 | 0 | 0 | 1 | 4 |
| CYP11B1  | 1 | 1 | 0 | 1 | 0 | 0 | 0 | 0 | 0 | 1 | 4 |
| PRUNE2   | 1 | 1 | 0 | 1 | 0 | 0 | 0 | 0 | 0 | 1 | 4 |
| CYP19A1  | 1 | 1 | 0 | 1 | 0 | 0 | 0 | 0 | 0 | 1 | 4 |
| FAM122B  | 1 | 1 | 0 | 1 | 0 | 0 | 0 | 0 | 0 | 1 | 4 |
| TMTC2    | 1 | 1 | 0 | 1 | 0 | 0 | 0 | 0 | 0 | 1 | 4 |
| MGC24039 | 1 | 1 | 0 | 1 | 0 | 0 | 0 | 0 | 0 | 1 | 4 |
| SLC5A8   | 1 | 1 | 0 | 1 | 0 | 0 | 0 | 0 | 0 | 1 | 4 |
| CCDC60   | 1 | 1 | 0 | 1 | 0 | 0 | 0 | 0 | 0 | 1 | 4 |
| DGKH     | 1 | 1 | 0 | 1 | 0 | 0 | 0 | 0 | 0 | 1 | 4 |
| DGKH     | 1 | 1 | 0 | 1 | 0 | 0 | 0 | 0 | 0 | 1 | 4 |
| GPR180   | 1 | 1 | 0 | 1 | 0 | 0 | 0 | 0 | 0 | 1 | 4 |
| STOML3   | 1 | 1 | 0 | 1 | 0 | 0 | 0 | 0 | 0 | 1 | 4 |
| DARS     | 1 | 1 | 0 | 1 | 0 | 0 | 0 | 0 | 0 | 1 | 4 |
| C15orf26 | 1 | 1 | 0 | 1 | 0 | 0 | 0 | 0 | 0 | 1 | 4 |
| EXDL1    | 1 | 1 | 0 | 1 | 0 | 0 | 0 | 0 | 0 | 1 | 4 |
| TMEM92   | 1 | 1 | 0 | 1 | 0 | 0 | 0 | 0 | 0 | 1 | 4 |
| RHBDL3   | 1 | 1 | 0 | 1 | 0 | 0 | 0 | 0 | 0 | 1 | 4 |
| DBT      | 1 | 1 | 0 | 1 | 0 | 0 | 0 | 0 | 0 | 1 | 4 |
| ZNF781   | 1 | 1 | 0 | 1 | 0 | 0 | 0 | 0 | 0 | 1 | 4 |
| ZNF540   | 1 | 1 | 0 | 1 | 0 | 0 | 0 | 0 | 0 | 1 | 4 |
| GBP6     | 1 | 1 | 0 | 1 | 0 | 0 | 0 | 0 | 0 | 1 | 4 |
| DCN      | 1 | 1 | 0 | 1 | 0 | 0 | 0 | 0 | 0 | 1 | 4 |
| DCN      | 1 | 1 | 0 | 1 | 0 | 0 | 0 | 0 | 0 | 1 | 4 |
| PAP2D    | 1 | 1 | 0 | 1 | 0 | 0 | 0 | 0 | 0 | 1 | 4 |
| TOR1AIP2 | 1 | 1 | 0 | 1 | 0 | 0 | 0 | 0 | 0 | 1 | 4 |
| C1orf71  | 1 | 1 | 0 | 1 | 0 | 0 | 0 | 0 | 0 | 1 | 4 |
| DCX      | 1 | 1 | 0 | 1 | 0 | 0 | 0 | 0 | 0 | 1 | 4 |
| LONRF2   | 1 | 1 | 0 | 1 | 0 | 0 | 0 | 0 | 0 | 1 | 4 |
| DDX3X    | 1 | 1 | 0 | 1 | 0 | 0 | 0 | 0 | 0 | 1 | 4 |
| AES      | 1 | 1 | 0 | 1 | 0 | 0 | 0 | 0 | 0 | 1 | 4 |
| PRICKLE2 | 1 | 1 | 0 | 1 | 0 | 0 | 0 | 0 | 0 | 1 | 4 |
| RASSF6   | 1 | 1 | 0 | 1 | 0 | 0 | 0 | 0 | 0 | 1 | 4 |
| MIER3    | 1 | 1 | 0 | 1 | 0 | 0 | 0 | 0 | 0 | 1 | 4 |
| SLC30A8  | 1 | 1 | 0 | 1 | 0 | 0 | 0 | 0 | 0 | 1 | 4 |
| TMEM64   | 1 | 1 | 0 | 1 | 0 | 0 | 0 | 0 | 0 | 1 | 4 |
| INDOL1   | 1 | 1 | 0 | 1 | 0 | 0 | 0 | 0 | 0 | 1 | 4 |
| OLFML2A  | 1 | 1 | 0 | 1 | 0 | 0 | 0 | 0 | 0 | 1 | 4 |
| QSOX2    | 1 | 1 | 0 | 1 | 0 | 0 | 0 | 0 | 0 | 1 | 4 |
| GLIS3    | 1 | 1 | 0 | 1 | 0 | 0 | 0 | 0 | 0 | 1 | 4 |
| FAM46D   | 1 | 1 | 0 | 1 | 0 | 0 | 0 | 0 | 0 | 1 | 4 |

|                 |   |   |   |   |   |   |   |   |   |   |   |
|-----------------|---|---|---|---|---|---|---|---|---|---|---|
| <u>FAM47B</u>   | 1 | 1 | 0 | 1 | 0 | 0 | 0 | 0 | 0 | 1 | 4 |
| <u>COMMD6</u>   | 1 | 1 | 0 | 1 | 0 | 0 | 0 | 0 | 0 | 1 | 4 |
| <u>KCNG3</u>    | 1 | 1 | 0 | 1 | 0 | 0 | 0 | 0 | 0 | 1 | 4 |
| <u>SYNPO2</u>   | 1 | 1 | 0 | 1 | 0 | 0 | 0 | 0 | 0 | 1 | 4 |
| <u>SYNPO2</u>   | 1 | 1 | 0 | 1 | 0 | 0 | 0 | 0 | 0 | 1 | 4 |
| <u>DIAPH1</u>   | 1 | 1 | 0 | 1 | 0 | 0 | 0 | 0 | 0 | 1 | 4 |
| <u>DIO2</u>     | 0 | 1 | 0 | 1 | 1 | 0 | 0 | 0 | 0 | 1 | 4 |
| <u>DKC1</u>     | 1 | 1 | 0 | 1 | 0 | 0 | 0 | 0 | 0 | 1 | 4 |
| <u>DR1</u>      | 1 | 1 | 0 | 1 | 0 | 0 | 0 | 0 | 0 | 1 | 4 |
| <u>DSC1</u>     | 1 | 1 | 0 | 1 | 0 | 0 | 0 | 0 | 0 | 1 | 4 |
| <u>DSC1</u>     | 1 | 1 | 0 | 1 | 0 | 0 | 0 | 0 | 0 | 1 | 4 |
| <u>DSC3</u>     | 1 | 1 | 0 | 1 | 0 | 0 | 0 | 0 | 0 | 1 | 4 |
| <u>DSC3</u>     | 1 | 1 | 0 | 1 | 0 | 0 | 0 | 0 | 0 | 1 | 4 |
| <u>AGT</u>      | 1 | 1 | 0 | 1 | 0 | 0 | 0 | 0 | 0 | 1 | 4 |
| <u>DTNA</u>     | 1 | 1 | 0 | 1 | 0 | 0 | 0 | 0 | 0 | 1 | 4 |
| <u>DTNA</u>     | 1 | 0 | 0 | 1 | 1 | 0 | 0 | 0 | 0 | 1 | 4 |
| <u>DUSP3</u>    | 1 | 1 | 0 | 1 | 0 | 0 | 0 | 0 | 0 | 1 | 4 |
| <u>TOR1A</u>    | 1 | 1 | 0 | 1 | 0 | 0 | 0 | 0 | 0 | 1 | 4 |
| <u>E2F1</u>     | 1 | 1 | 0 | 1 | 0 | 0 | 0 | 0 | 0 | 1 | 4 |
| <u>ABCA1</u>    | 1 | 1 | 0 | 1 | 0 | 0 | 0 | 0 | 0 | 1 | 4 |
| <u>EDG1</u>     | 1 | 1 | 0 | 1 | 0 | 0 | 0 | 0 | 0 | 1 | 4 |
| <u>EDNRA</u>    | 1 | 1 | 0 | 1 | 0 | 0 | 0 | 0 | 0 | 1 | 4 |
| <u>HIGD2A</u>   | 1 | 1 | 0 | 1 | 0 | 0 | 0 | 0 | 0 | 1 | 4 |
| <u>EIF2C4</u>   | 1 | 1 | 0 | 1 | 0 | 0 | 0 | 0 | 0 | 1 | 4 |
| <u>MEGF9</u>    | 1 | 1 | 0 | 1 | 0 | 0 | 0 | 0 | 0 | 1 | 4 |
| <u>EGR1</u>     | 1 | 1 | 0 | 1 | 0 | 0 | 0 | 0 | 0 | 1 | 4 |
| <u>P76</u>      | 1 | 1 | 0 | 1 | 0 | 0 | 0 | 0 | 0 | 1 | 4 |
| <u>FAM71C</u>   | 1 | 1 | 0 | 1 | 0 | 0 | 0 | 0 | 0 | 1 | 4 |
| <u>ARID2</u>    | 1 | 1 | 0 | 1 | 0 | 0 | 0 | 0 | 0 | 1 | 4 |
| <u>EIF2S3</u>   | 1 | 1 | 0 | 1 | 0 | 0 | 0 | 0 | 0 | 1 | 4 |
| <u>ELAVL2</u>   | 1 | 1 | 0 | 1 | 0 | 0 | 0 | 0 | 0 | 1 | 4 |
| <u>ELAVL3</u>   | 1 | 1 | 0 | 1 | 0 | 0 | 0 | 0 | 0 | 1 | 4 |
| <u>C19orf59</u> | 1 | 1 | 0 | 1 | 0 | 0 | 0 | 0 | 0 | 1 | 4 |
| <u>SLC5A9</u>   | 1 | 1 | 0 | 1 | 0 | 0 | 0 | 0 | 0 | 1 | 4 |
| <u>TXLNA</u>    | 1 | 1 | 0 | 1 | 0 | 0 | 0 | 0 | 0 | 1 | 4 |
| <u>CREG2</u>    | 1 | 1 | 0 | 1 | 0 | 0 | 0 | 0 | 0 | 1 | 4 |
| <u>C2orf13</u>  | 1 | 1 | 0 | 1 | 0 | 0 | 0 | 0 | 0 | 1 | 4 |
| <u>FBXO45</u>   | 1 | 1 | 0 | 1 | 0 | 0 | 0 | 0 | 0 | 1 | 4 |
| <u>PRR6</u>     | 1 | 1 | 0 | 1 | 0 | 0 | 0 | 0 | 0 | 1 | 4 |
| <u>CCDC125</u>  | 1 | 1 | 0 | 1 | 0 | 0 | 0 | 0 | 0 | 1 | 4 |
| <u>C5orf29</u>  | 1 | 1 | 0 | 1 | 0 | 0 | 0 | 0 | 0 | 1 | 4 |

|                  |   |   |   |   |   |   |   |   |   |   |   |
|------------------|---|---|---|---|---|---|---|---|---|---|---|
| <u>TUBB</u>      | 1 | 1 | 0 | 1 | 0 | 0 | 0 | 0 | 0 | 1 | 4 |
| <u>C9orf91</u>   | 1 | 1 | 0 | 1 | 0 | 0 | 0 | 0 | 0 | 1 | 4 |
| <u>C9orf25</u>   | 1 | 1 | 0 | 1 | 0 | 0 | 0 | 0 | 0 | 1 | 4 |
| <u>EPB41</u>     | 1 | 1 | 0 | 1 | 0 | 0 | 0 | 0 | 0 | 1 | 4 |
| <u>ZNF449</u>    | 1 | 1 | 0 | 1 | 0 | 0 | 0 | 0 | 0 | 1 | 4 |
| <u>LOC203547</u> | 1 | 1 | 0 | 1 | 0 | 0 | 0 | 0 | 0 | 1 | 4 |
| <u>EPHA3</u>     | 1 | 1 | 0 | 1 | 0 | 0 | 0 | 0 | 0 | 1 | 4 |
| <u>LASS3</u>     | 1 | 1 | 0 | 1 | 0 | 0 | 0 | 0 | 0 | 1 | 4 |
| <u>EPHA7</u>     | 1 | 1 | 0 | 1 | 0 | 0 | 0 | 0 | 0 | 1 | 4 |
| <u>EPHB1</u>     | 1 | 1 | 0 | 1 | 0 | 0 | 0 | 0 | 0 | 1 | 4 |
| <u>HIPK1</u>     | 1 | 1 | 0 | 1 | 0 | 0 | 0 | 0 | 0 | 1 | 4 |
| <u>STX2</u>      | 1 | 1 | 0 | 1 | 0 | 0 | 0 | 0 | 0 | 1 | 4 |
| <u>STX2</u>      | 1 | 1 | 0 | 1 | 0 | 0 | 0 | 0 | 0 | 1 | 4 |
| <u>C3orf58</u>   | 1 | 1 | 0 | 1 | 0 | 0 | 0 | 0 | 0 | 1 | 4 |
| <u>CLN8</u>      | 1 | 1 | 0 | 1 | 0 | 0 | 0 | 0 | 0 | 1 | 4 |
| <u>EPS15</u>     | 1 | 1 | 0 | 1 | 0 | 0 | 0 | 0 | 0 | 1 | 4 |
| <u>SLC36A1</u>   | 1 | 1 | 0 | 1 | 0 | 0 | 0 | 0 | 0 | 1 | 4 |
| <u>ERBB4</u>     | 1 | 1 | 0 | 1 | 0 | 0 | 0 | 0 | 0 | 1 | 4 |
| <u>EREG</u>      | 1 | 1 | 0 | 1 | 0 | 0 | 0 | 0 | 0 | 1 | 4 |
| <u>EYA4</u>      | 1 | 0 | 0 | 1 | 1 | 0 | 0 | 0 | 0 | 1 | 4 |
| <u>EYA4</u>      | 1 | 0 | 0 | 1 | 1 | 0 | 0 | 0 | 0 | 1 | 4 |
| <u>ERG</u>       | 1 | 1 | 0 | 1 | 0 | 0 | 0 | 0 | 0 | 1 | 4 |
| <u>AKT2</u>      | 1 | 1 | 0 | 1 | 0 | 0 | 0 | 0 | 0 | 1 | 4 |
| <u>ESR1</u>      | 1 | 1 | 0 | 1 | 0 | 0 | 0 | 0 | 0 | 1 | 4 |
| <u>ETS1</u>      | 1 | 0 | 0 | 1 | 1 | 0 | 0 | 0 | 0 | 1 | 4 |
| <u>EVI2A</u>     | 1 | 1 | 0 | 1 | 0 | 0 | 0 | 0 | 0 | 1 | 4 |
| <u>EXT2</u>      | 1 | 1 | 0 | 1 | 0 | 0 | 0 | 0 | 0 | 1 | 4 |
| <u>F2R</u>       | 1 | 1 | 0 | 1 | 0 | 0 | 0 | 0 | 0 | 1 | 4 |
| <u>F5</u>        | 1 | 1 | 0 | 1 | 0 | 0 | 0 | 0 | 0 | 1 | 4 |
| <u>F11</u>       | 1 | 1 | 0 | 1 | 0 | 0 | 0 | 0 | 0 | 1 | 4 |
| <u>C10orf56</u>  | 1 | 1 | 0 | 1 | 0 | 0 | 0 | 0 | 0 | 1 | 4 |
| <u>RTKN2</u>     | 1 | 1 | 0 | 1 | 0 | 0 | 0 | 0 | 0 | 1 | 4 |
| <u>PLAC1L</u>    | 1 | 1 | 0 | 1 | 0 | 0 | 0 | 0 | 0 | 1 | 4 |
| <u>HNRPA3</u>    | 1 | 1 | 0 | 1 | 0 | 0 | 0 | 0 | 0 | 1 | 4 |
| <u>C10orf38</u>  | 1 | 1 | 0 | 1 | 0 | 0 | 0 | 0 | 0 | 1 | 4 |
| <u>CPNE2</u>     | 1 | 1 | 0 | 1 | 0 | 0 | 0 | 0 | 0 | 1 | 4 |
| <u>C6orf199</u>  | 1 | 1 | 0 | 1 | 0 | 0 | 0 | 0 | 0 | 1 | 4 |
| <u>FAM26D</u>    | 1 | 1 | 0 | 1 | 0 | 0 | 0 | 0 | 0 | 1 | 4 |
| <u>C6orf170</u>  | 1 | 1 | 0 | 1 | 0 | 0 | 0 | 0 | 0 | 1 | 4 |
| <u>OPN5</u>      | 1 | 1 | 0 | 1 | 0 | 0 | 0 | 0 | 0 | 1 | 4 |
| <u>GPR116</u>    | 1 | 1 | 0 | 1 | 0 | 0 | 0 | 0 | 0 | 1 | 4 |



|                 |   |   |   |   |   |   |   |   |   |   |   |
|-----------------|---|---|---|---|---|---|---|---|---|---|---|
| <u>C6orf223</u> | 1 | 1 | 0 | 1 | 0 | 0 | 0 | 0 | 0 | 1 | 4 |
| <u>C6orf128</u> | 1 | 1 | 0 | 1 | 0 | 0 | 0 | 0 | 0 | 1 | 4 |
| <u>C6orf89</u>  | 1 | 1 | 0 | 1 | 0 | 0 | 0 | 0 | 0 | 1 | 4 |
| <u>RNF182</u>   | 0 | 1 | 0 | 1 | 1 | 0 | 0 | 0 | 0 | 1 | 4 |
| <u>FKTN</u>     | 1 | 1 | 0 | 1 | 0 | 0 | 0 | 0 | 0 | 1 | 4 |
| <u>TWISTNB</u>  | 1 | 1 | 0 | 1 | 0 | 0 | 0 | 0 | 0 | 1 | 4 |
| <u>FOKK1</u>    | 1 | 1 | 0 | 1 | 0 | 0 | 0 | 0 | 0 | 1 | 4 |
| <u>FDFT1</u>    | 1 | 1 | 0 | 1 | 0 | 0 | 0 | 0 | 0 | 1 | 4 |
| <u>LNX2</u>     | 1 | 1 | 0 | 1 | 0 | 0 | 0 | 0 | 0 | 1 | 4 |
| <u>SLC35F1</u>  | 1 | 1 | 0 | 1 | 0 | 0 | 0 | 0 | 0 | 1 | 4 |
| <u>ALDH9A1</u>  | 1 | 1 | 0 | 1 | 0 | 0 | 0 | 0 | 0 | 1 | 4 |
| <u>FDX1</u>     | 1 | 1 | 0 | 1 | 0 | 0 | 0 | 0 | 0 | 1 | 4 |
| <u>ZNRF2</u>    | 1 | 1 | 0 | 1 | 0 | 0 | 0 | 0 | 0 | 1 | 4 |
| <u>SEMA3D</u>   | 1 | 1 | 0 | 1 | 0 | 0 | 0 | 0 | 0 | 1 | 4 |
| <u>FGF7</u>     | 1 | 1 | 0 | 1 | 0 | 0 | 0 | 0 | 0 | 1 | 4 |
| <u>FGFR1</u>    | 1 | 1 | 0 | 1 | 0 | 0 | 0 | 0 | 0 | 1 | 4 |
| <u>TFEC</u>     | 1 | 1 | 0 | 1 | 0 | 0 | 0 | 0 | 0 | 1 | 4 |
| <u>FKBP1A</u>   | 1 | 1 | 0 | 1 | 0 | 0 | 0 | 0 | 0 | 1 | 4 |
| <u>MTF2</u>     | 1 | 1 | 0 | 1 | 0 | 0 | 0 | 0 | 0 | 1 | 4 |
| <u>NLGN4Y</u>   | 1 | 1 | 0 | 1 | 0 | 0 | 0 | 0 | 0 | 1 | 4 |
| <u>ZFP30</u>    | 1 | 1 | 0 | 1 | 0 | 0 | 0 | 0 | 0 | 1 | 4 |
| <u>VASH1</u>    | 1 | 1 | 0 | 1 | 0 | 0 | 0 | 0 | 0 | 1 | 4 |
| <u>FNDC3A</u>   | 1 | 1 | 0 | 1 | 0 | 0 | 0 | 0 | 0 | 1 | 4 |
| <u>FNDC3A</u>   | 1 | 0 | 0 | 1 | 1 | 0 | 0 | 0 | 0 | 1 | 4 |
| <u>MON1B</u>    | 1 | 1 | 0 | 1 | 0 | 0 | 0 | 0 | 0 | 1 | 4 |
| <u>FKBP4</u>    | 1 | 1 | 0 | 1 | 1 | 0 | 0 | 0 | 0 | 0 | 4 |
| <u>DIS3</u>     | 1 | 1 | 0 | 1 | 0 | 0 | 0 | 0 | 0 | 1 | 4 |
| <u>ARHGEF15</u> | 1 | 1 | 0 | 1 | 0 | 0 | 0 | 0 | 0 | 1 | 4 |
| <u>CARD8</u>    | 1 | 1 | 0 | 1 | 0 | 0 | 0 | 0 | 0 | 1 | 4 |
| <u>EPN2</u>     | 1 | 1 | 0 | 1 | 0 | 0 | 0 | 0 | 0 | 1 | 4 |
| <u>MTMR15</u>   | 1 | 1 | 0 | 1 | 0 | 0 | 0 | 0 | 0 | 1 | 4 |
| <u>NCBP2</u>    | 1 | 1 | 0 | 1 | 0 | 0 | 0 | 0 | 0 | 1 | 4 |
| <u>TPX2</u>     | 1 | 1 | 0 | 1 | 0 | 0 | 0 | 0 | 0 | 1 | 4 |
| <u>DIP2C</u>    | 1 | 1 | 0 | 1 | 0 | 0 | 0 | 0 | 0 | 1 | 4 |
| <u>SORCS3</u>   | 1 | 1 | 0 | 1 | 0 | 0 | 0 | 0 | 0 | 1 | 4 |
| <u>MYH15</u>    | 1 | 1 | 0 | 1 | 0 | 0 | 0 | 0 | 0 | 1 | 4 |
| <u>WDFY3</u>    | 1 | 1 | 0 | 1 | 0 | 0 | 0 | 0 | 0 | 1 | 4 |
| <u>DAAM1</u>    | 1 | 1 | 0 | 1 | 0 | 0 | 0 | 0 | 0 | 1 | 4 |
| <u>KIAA0265</u> | 1 | 1 | 0 | 1 | 1 | 0 | 0 | 0 | 0 | 0 | 4 |
| <u>FBXO21</u>   | 1 | 1 | 0 | 1 | 0 | 0 | 0 | 0 | 0 | 1 | 4 |
| <u>CNOT1</u>    | 1 | 1 | 0 | 1 | 0 | 0 | 0 | 0 | 0 | 1 | 4 |

|                  |   |   |   |   |   |   |   |   |   |   |   |
|------------------|---|---|---|---|---|---|---|---|---|---|---|
| <u>TMCC1</u>     | 1 | 1 | 0 | 1 | 0 | 0 | 0 | 0 | 0 | 1 | 4 |
| <u>PDZRN3</u>    | 1 | 1 | 0 | 1 | 0 | 0 | 0 | 0 | 0 | 1 | 4 |
| <u>PHLPPL</u>    | 1 | 1 | 0 | 1 | 0 | 0 | 0 | 0 | 0 | 1 | 4 |
| <u>MON2</u>      | 1 | 1 | 0 | 1 | 0 | 0 | 0 | 0 | 0 | 1 | 4 |
| <u>PDXDC1</u>    | 1 | 1 | 0 | 1 | 0 | 0 | 0 | 0 | 0 | 1 | 4 |
| <u>PDS5B</u>     | 1 | 1 | 0 | 1 | 1 | 0 | 0 | 0 | 0 | 0 | 4 |
| <u>ENDOD1</u>    | 1 | 1 | 0 | 1 | 0 | 0 | 0 | 0 | 0 | 1 | 4 |
| <u>NMNAT2</u>    | 1 | 1 | 0 | 1 | 0 | 0 | 0 | 0 | 0 | 1 | 4 |
| <u>GGA2</u>      | 1 | 1 | 0 | 1 | 0 | 0 | 0 | 0 | 0 | 1 | 4 |
| <u>SETX</u>      | 1 | 1 | 0 | 1 | 0 | 0 | 0 | 0 | 0 | 1 | 4 |
| <u>KIAA0090</u>  | 1 | 1 | 0 | 1 | 0 | 0 | 0 | 0 | 0 | 1 | 4 |
| <u>RRP1B</u>     | 1 | 1 | 0 | 1 | 0 | 0 | 0 | 0 | 0 | 1 | 4 |
| <u>KIAA0241</u>  | 1 | 1 | 0 | 1 | 0 | 0 | 0 | 0 | 0 | 1 | 4 |
| <u>TRIM35</u>    | 1 | 1 | 0 | 1 | 0 | 0 | 0 | 0 | 0 | 1 | 4 |
| <u>ARHGAP26</u>  | 1 | 1 | 0 | 1 | 0 | 0 | 0 | 0 | 0 | 1 | 4 |
| <u>TBC1D2B</u>   | 1 | 1 | 0 | 1 | 0 | 0 | 0 | 0 | 0 | 1 | 4 |
| <u>TBC1D2B</u>   | 1 | 1 | 0 | 1 | 0 | 0 | 0 | 0 | 0 | 1 | 4 |
| <u>MRPS27</u>    | 1 | 1 | 0 | 1 | 0 | 0 | 0 | 0 | 0 | 1 | 4 |
| <u>SPG20</u>     | 1 | 1 | 0 | 1 | 0 | 0 | 0 | 0 | 0 | 1 | 4 |
| <u>MAP3K7IP2</u> | 1 | 1 | 0 | 1 | 0 | 0 | 0 | 0 | 0 | 1 | 4 |
| <u>CAMTA2</u>    | 1 | 1 | 0 | 1 | 0 | 0 | 0 | 0 | 0 | 1 | 4 |
| <u>EPB41L3</u>   | 1 | 1 | 0 | 1 | 0 | 0 | 0 | 0 | 0 | 1 | 4 |
| <u>N4BP3</u>     | 1 | 1 | 0 | 1 | 0 | 0 | 0 | 0 | 0 | 1 | 4 |
| <u>CLCC1</u>     | 1 | 1 | 0 | 1 | 0 | 0 | 0 | 0 | 0 | 1 | 4 |
| <u>TBC1D9</u>    | 1 | 1 | 0 | 1 | 0 | 0 | 0 | 0 | 0 | 1 | 4 |
| <u>METAP1</u>    | 1 | 1 | 0 | 1 | 0 | 0 | 0 | 0 | 0 | 1 | 4 |
| <u>SEPT7</u>     | 1 | 1 | 0 | 1 | 0 | 0 | 0 | 0 | 0 | 1 | 4 |
| <u>SEPT7</u>     | 1 | 1 | 0 | 1 | 0 | 0 | 0 | 0 | 0 | 1 | 4 |
| <u>RCOR1</u>     | 1 | 1 | 0 | 1 | 0 | 0 | 0 | 0 | 0 | 1 | 4 |
| <u>FLOT2</u>     | 1 | 1 | 0 | 1 | 0 | 0 | 0 | 0 | 0 | 1 | 4 |
| <u>ATP11B</u>    | 1 | 1 | 0 | 1 | 0 | 0 | 0 | 0 | 0 | 1 | 4 |
| <u>BAT2D1</u>    | 1 | 1 | 0 | 1 | 0 | 0 | 0 | 0 | 0 | 1 | 4 |
| <u>ZFR2</u>      | 1 | 1 | 0 | 1 | 0 | 0 | 0 | 0 | 0 | 1 | 4 |
| <u>DTX4</u>      | 1 | 1 | 0 | 1 | 0 | 0 | 0 | 0 | 0 | 1 | 4 |
| <u>VPS13A</u>    | 1 | 1 | 0 | 1 | 0 | 0 | 0 | 0 | 0 | 1 | 4 |
| <u>VPS13A</u>    | 1 | 1 | 0 | 1 | 0 | 0 | 0 | 0 | 0 | 1 | 4 |
| <u>SNF1LK2</u>   | 1 | 1 | 0 | 1 | 0 | 0 | 0 | 0 | 0 | 1 | 4 |
| <u>PACS2</u>     | 1 | 1 | 0 | 1 | 0 | 0 | 0 | 0 | 0 | 1 | 4 |
| <u>COBL</u>      | 1 | 1 | 0 | 1 | 0 | 0 | 0 | 0 | 0 | 1 | 4 |
| <u>ATP11A</u>    | 1 | 1 | 0 | 1 | 0 | 0 | 0 | 0 | 0 | 1 | 4 |
| <u>ATP11A</u>    | 1 | 1 | 0 | 1 | 0 | 0 | 0 | 0 | 0 | 1 | 4 |

|                  |   |   |   |   |   |   |   |   |   |   |   |
|------------------|---|---|---|---|---|---|---|---|---|---|---|
| <u>KIAA1024</u>  | 1 | 1 | 0 | 1 | 0 | 0 | 0 | 0 | 0 | 1 | 4 |
| <u>ANKRD12</u>   | 1 | 1 | 0 | 1 | 0 | 0 | 0 | 0 | 0 | 1 | 4 |
| <u>CAMTA1</u>    | 1 | 1 | 0 | 1 | 0 | 0 | 0 | 0 | 0 | 1 | 4 |
| <u>TSPYL4</u>    | 1 | 1 | 0 | 1 | 0 | 0 | 0 | 0 | 0 | 1 | 4 |
| <u>CAMSAP1L1</u> | 1 | 1 | 0 | 1 | 0 | 0 | 0 | 0 | 0 | 1 | 4 |
| <u>KIAA0664</u>  | 1 | 1 | 0 | 1 | 0 | 0 | 0 | 0 | 0 | 1 | 4 |
| <u>SMG6</u>      | 1 | 1 | 0 | 1 | 0 | 0 | 0 | 0 | 0 | 1 | 4 |
| <u>BICD2</u>     | 1 | 1 | 0 | 1 | 1 | 0 | 0 | 0 | 0 | 0 | 4 |
| <u>ATMIN</u>     | 1 | 1 | 0 | 1 | 0 | 0 | 0 | 0 | 0 | 1 | 4 |
| <u>WSCD1</u>     | 1 | 1 | 0 | 1 | 0 | 0 | 0 | 0 | 0 | 1 | 4 |
| <u>TMEM194</u>   | 1 | 1 | 0 | 1 | 0 | 0 | 0 | 0 | 0 | 1 | 4 |
| <u>ICOSLG</u>    | 1 | 1 | 0 | 1 | 0 | 0 | 0 | 0 | 0 | 1 | 4 |
| <u>DMXL2</u>     | 1 | 1 | 0 | 1 | 0 | 0 | 0 | 0 | 0 | 1 | 4 |
| <u>SLC9A8</u>    | 1 | 1 | 0 | 1 | 0 | 0 | 0 | 0 | 0 | 1 | 4 |
| <u>SASH1</u>     | 1 | 1 | 0 | 1 | 0 | 0 | 0 | 0 | 0 | 1 | 4 |
| <u>DPY19L1</u>   | 1 | 1 | 0 | 1 | 0 | 0 | 0 | 0 | 0 | 1 | 4 |
| <u>WDR7</u>      | 1 | 1 | 0 | 1 | 0 | 0 | 0 | 0 | 0 | 1 | 4 |
| <u>AFF2</u>      | 1 | 1 | 0 | 1 | 0 | 0 | 0 | 0 | 0 | 1 | 4 |
| <u>SYNE1</u>     | 0 | 0 | 0 | 1 | 1 | 1 | 0 | 0 | 0 | 1 | 4 |
| <u>SYNE1</u>     | 0 | 0 | 0 | 1 | 1 | 1 | 0 | 0 | 0 | 1 | 4 |
| <u>SYNE1</u>     | 0 | 0 | 0 | 1 | 1 | 1 | 0 | 0 | 0 | 1 | 4 |
| <u>KIAA1045</u>  | 1 | 1 | 0 | 1 | 0 | 0 | 0 | 0 | 0 | 1 | 4 |
| <u>SR140</u>     | 1 | 1 | 0 | 1 | 0 | 0 | 0 | 0 | 0 | 1 | 4 |
| <u>FNBP4</u>     | 1 | 1 | 0 | 1 | 0 | 0 | 0 | 0 | 0 | 1 | 4 |
| <u>PSD3</u>      | 1 | 1 | 0 | 1 | 0 | 0 | 0 | 0 | 0 | 1 | 4 |
| <u>ARHGEF12</u>  | 1 | 1 | 0 | 1 | 0 | 0 | 0 | 0 | 0 | 1 | 4 |
| <u>KIAA0895</u>  | 1 | 1 | 0 | 1 | 0 | 0 | 0 | 0 | 0 | 1 | 4 |
| <u>SRGAP2</u>    | 1 | 1 | 0 | 1 | 0 | 0 | 0 | 0 | 0 | 1 | 4 |
| <u>SPECC1L</u>   | 1 | 0 | 0 | 1 | 1 | 0 | 0 | 0 | 0 | 1 | 4 |
| <u>ZDHHC17</u>   | 1 | 1 | 0 | 1 | 0 | 0 | 0 | 0 | 0 | 1 | 4 |
| <u>NCAPH</u>     | 1 | 1 | 0 | 1 | 0 | 0 | 0 | 0 | 0 | 1 | 4 |
| <u>FRAT2</u>     | 1 | 1 | 0 | 1 | 0 | 0 | 0 | 0 | 0 | 1 | 4 |
| <u>EXOSC2</u>    | 1 | 1 | 0 | 1 | 0 | 0 | 0 | 0 | 0 | 1 | 4 |
| <u>FREQ</u>      | 1 | 1 | 0 | 1 | 0 | 0 | 0 | 0 | 0 | 1 | 4 |
| <u>HEY1</u>      | 1 | 1 | 0 | 1 | 0 | 0 | 0 | 0 | 0 | 1 | 4 |
| <u>ICMT</u>      | 1 | 1 | 0 | 1 | 0 | 0 | 0 | 0 | 0 | 1 | 4 |
| <u>NPTXR</u>     | 0 | 1 | 0 | 1 | 1 | 0 | 0 | 0 | 0 | 1 | 4 |
| <u>HEY2</u>      | 1 | 1 | 0 | 1 | 0 | 0 | 0 | 0 | 0 | 1 | 4 |
| <u>ZFYVE26</u>   | 1 | 1 | 0 | 1 | 0 | 0 | 0 | 0 | 0 | 1 | 4 |
| <u>TMEM131</u>   | 1 | 1 | 0 | 1 | 0 | 0 | 0 | 0 | 0 | 1 | 4 |
| <u>POFUT1</u>    | 1 | 1 | 0 | 1 | 0 | 0 | 0 | 0 | 0 | 1 | 4 |

|                 |   |   |   |   |   |   |   |   |   |   |   |
|-----------------|---|---|---|---|---|---|---|---|---|---|---|
| <u>KCTD2</u>    | 1 | 1 | 0 | 1 | 0 | 0 | 0 | 0 | 0 | 1 | 4 |
| <u>MORC3</u>    | 1 | 1 | 0 | 1 | 0 | 0 | 0 | 0 | 0 | 1 | 4 |
| <u>HYAL4</u>    | 1 | 1 | 0 | 1 | 0 | 0 | 0 | 0 | 0 | 1 | 4 |
| <u>ARL2BP</u>   | 1 | 1 | 0 | 1 | 0 | 0 | 0 | 0 | 0 | 1 | 4 |
| <u>DDAH1</u>    | 1 | 1 | 0 | 1 | 0 | 0 | 0 | 0 | 0 | 1 | 4 |
| <u>FPRL1</u>    | 1 | 1 | 0 | 1 | 0 | 0 | 0 | 0 | 0 | 1 | 4 |
| <u>DDX58</u>    | 1 | 1 | 0 | 1 | 0 | 0 | 0 | 0 | 0 | 1 | 4 |
| <u>FPRL2</u>    | 1 | 1 | 0 | 1 | 0 | 0 | 0 | 0 | 0 | 1 | 4 |
| <u>CORO1C</u>   | 1 | 1 | 0 | 1 | 0 | 0 | 0 | 0 | 0 | 1 | 4 |
| <u>CD2AP</u>    | 1 | 1 | 0 | 1 | 0 | 0 | 0 | 0 | 0 | 1 | 4 |
| <u>MKRN1</u>    | 1 | 1 | 0 | 1 | 0 | 0 | 0 | 0 | 0 | 1 | 4 |
| <u>ZMYND8</u>   | 1 | 1 | 0 | 1 | 1 | 0 | 0 | 0 | 0 | 0 | 4 |
| <u>PRND</u>     | 1 | 1 | 0 | 1 | 0 | 0 | 0 | 0 | 0 | 1 | 4 |
| <u>STX12</u>    | 1 | 1 | 0 | 1 | 0 | 0 | 0 | 0 | 0 | 1 | 4 |
| <u>SGK3</u>     | 1 | 1 | 0 | 1 | 0 | 0 | 0 | 0 | 0 | 1 | 4 |
| <u>RAB38</u>    | 1 | 1 | 0 | 1 | 0 | 0 | 0 | 0 | 0 | 1 | 4 |
| <u>C15orf2</u>  | 1 | 1 | 0 | 1 | 0 | 0 | 0 | 0 | 0 | 1 | 4 |
| <u>SDF2L1</u>   | 1 | 1 | 0 | 1 | 1 | 0 | 0 | 0 | 0 | 0 | 4 |
| <u>PITPNB</u>   | 1 | 1 | 0 | 1 | 0 | 0 | 0 | 0 | 0 | 1 | 4 |
| <u>MTCH2</u>    | 1 | 1 | 0 | 1 | 1 | 0 | 0 | 0 | 0 | 0 | 4 |
| <u>PANX1</u>    | 1 | 1 | 0 | 1 | 0 | 0 | 0 | 0 | 0 | 1 | 4 |
| <u>VGLL2</u>    | 1 | 1 | 0 | 1 | 0 | 0 | 0 | 0 | 0 | 1 | 4 |
| <u>ATP6V0D2</u> | 1 | 1 | 0 | 1 | 0 | 0 | 0 | 0 | 0 | 1 | 4 |
| <u>ATP6V1C2</u> | 1 | 1 | 0 | 1 | 0 | 0 | 0 | 0 | 0 | 1 | 4 |
| <u>CNOT6L</u>   | 1 | 1 | 0 | 1 | 0 | 0 | 0 | 0 | 0 | 1 | 4 |
| <u>LACE1</u>    | 1 | 1 | 0 | 1 | 0 | 0 | 0 | 0 | 0 | 1 | 4 |
| <u>FUT1</u>     | 1 | 1 | 0 | 1 | 0 | 0 | 0 | 0 | 0 | 1 | 4 |
| <u>FUT4</u>     | 1 | 1 | 0 | 1 | 0 | 0 | 0 | 0 | 0 | 1 | 4 |
| <u>ZNF396</u>   | 1 | 1 | 0 | 1 | 0 | 0 | 0 | 0 | 0 | 1 | 4 |
| <u>STXBP4</u>   | 1 | 1 | 0 | 1 | 0 | 0 | 0 | 0 | 0 | 1 | 4 |
| <u>SRD5A2L2</u> | 1 | 1 | 0 | 1 | 0 | 0 | 0 | 0 | 0 | 1 | 4 |
| <u>KDSR</u>     | 1 | 1 | 0 | 1 | 0 | 0 | 0 | 0 | 0 | 1 | 4 |
| <u>RICTOR</u>   | 1 | 1 | 0 | 1 | 0 | 0 | 0 | 0 | 0 | 1 | 4 |
| <u>FYB</u>      | 1 | 1 | 0 | 1 | 0 | 0 | 0 | 0 | 0 | 1 | 4 |
| <u>CADM2</u>    | 1 | 1 | 0 | 1 | 1 | 0 | 0 | 0 | 0 | 0 | 4 |
| <u>CCDC75</u>   | 1 | 1 | 0 | 1 | 0 | 0 | 0 | 0 | 0 | 1 | 4 |
| <u>LASS6</u>    | 1 | 1 | 0 | 1 | 0 | 0 | 0 | 0 | 0 | 1 | 4 |
| <u>YTHDF3</u>   | 0 | 1 | 0 | 1 | 1 | 0 | 0 | 0 | 0 | 1 | 4 |
| <u>RNF169</u>   | 1 | 1 | 0 | 1 | 0 | 0 | 0 | 0 | 0 | 1 | 4 |
| <u>FAM26E</u>   | 1 | 1 | 0 | 1 | 0 | 0 | 0 | 0 | 0 | 1 | 4 |
| <u>LYG2</u>     | 1 | 1 | 0 | 1 | 0 | 0 | 0 | 0 | 0 | 1 | 4 |

|                      |   |   |   |   |   |   |   |   |   |   |   |
|----------------------|---|---|---|---|---|---|---|---|---|---|---|
| <u>GABRA1</u>        | 1 | 1 | 0 | 1 | 0 | 0 | 0 | 0 | 0 | 1 | 4 |
| <u>RNF144B</u>       | 1 | 1 | 0 | 1 | 0 | 0 | 0 | 0 | 0 | 1 | 4 |
| <u>GABRA4</u>        | 1 | 1 | 0 | 1 | 0 | 0 | 0 | 0 | 0 | 1 | 4 |
| <u>C3orf43</u>       | 1 | 1 | 0 | 1 | 0 | 0 | 0 | 0 | 0 | 1 | 4 |
| <u>PAN3</u>          | 1 | 1 | 0 | 1 | 0 | 0 | 0 | 0 | 0 | 1 | 4 |
| <u>ZNF549</u>        | 1 | 1 | 0 | 1 | 0 | 0 | 0 | 0 | 0 | 1 | 4 |
| <u>GABRB2</u>        | 1 | 1 | 0 | 1 | 0 | 0 | 0 | 0 | 0 | 1 | 4 |
| <u>TMEM196</u>       | 1 | 1 | 0 | 1 | 0 | 0 | 0 | 0 | 0 | 1 | 4 |
| <u>GK5</u>           | 1 | 1 | 0 | 1 | 0 | 0 | 0 | 0 | 0 | 1 | 4 |
| <u>ST6GALNAC3</u>    | 1 | 1 | 0 | 1 | 0 | 0 | 0 | 0 | 0 | 1 | 4 |
| <u>GABRG1</u>        | 1 | 1 | 0 | 1 | 0 | 0 | 0 | 0 | 0 | 1 | 4 |
| <u>GABRG2</u>        | 1 | 1 | 0 | 1 | 0 | 0 | 0 | 0 | 0 | 1 | 4 |
| <u>WDR72</u>         | 1 | 1 | 0 | 1 | 0 | 0 | 0 | 0 | 0 | 1 | 4 |
| <u>C10orf67</u>      | 1 | 1 | 0 | 1 | 0 | 0 | 0 | 0 | 0 | 1 | 4 |
| <u>NEGR1</u>         | 1 | 1 | 0 | 1 | 0 | 0 | 0 | 0 | 0 | 1 | 4 |
| <u>SVIP</u>          | 1 | 1 | 0 | 1 | 0 | 0 | 0 | 0 | 0 | 1 | 4 |
| <u>DNAJB5</u>        | 1 | 0 | 0 | 1 | 1 | 0 | 0 | 0 | 0 | 1 | 4 |
| <u>NIPBL</u>         | 1 | 1 | 0 | 1 | 0 | 0 | 0 | 0 | 0 | 1 | 4 |
| <u>ABTB2</u>         | 1 | 1 | 0 | 1 | 0 | 0 | 0 | 0 | 0 | 1 | 4 |
| <u>DKFZP564O0823</u> | 1 | 1 | 0 | 1 | 0 | 0 | 0 | 0 | 0 | 1 | 4 |
| <u>FAM119B</u>       | 1 | 1 | 0 | 1 | 0 | 0 | 0 | 0 | 0 | 1 | 4 |
| <u>FAM119B</u>       | 1 | 1 | 0 | 1 | 0 | 0 | 0 | 0 | 0 | 1 | 4 |
| <u>GALNT2</u>        | 1 | 1 | 0 | 1 | 0 | 0 | 0 | 0 | 0 | 1 | 4 |
| <u>IFFO</u>          | 1 | 1 | 0 | 1 | 0 | 0 | 0 | 0 | 0 | 1 | 4 |
| <u>AHCTF1</u>        | 1 | 1 | 0 | 1 | 0 | 0 | 0 | 0 | 0 | 1 | 4 |
| <u>GALNT3</u>        | 1 | 1 | 0 | 1 | 0 | 0 | 0 | 0 | 0 | 1 | 4 |
| <u>C1orf43</u>       | 1 | 1 | 0 | 1 | 0 | 0 | 0 | 0 | 0 | 1 | 4 |
| <u>THUMPD3</u>       | 1 | 1 | 0 | 1 | 0 | 0 | 0 | 0 | 0 | 1 | 4 |
| <u>NSL1</u>          | 1 | 1 | 0 | 1 | 0 | 0 | 0 | 0 | 0 | 1 | 4 |
| <u>NSL1</u>          | 1 | 1 | 0 | 1 | 0 | 0 | 0 | 0 | 0 | 1 | 4 |
| <u>SAMHD1</u>        | 1 | 1 | 0 | 1 | 0 | 0 | 0 | 0 | 0 | 1 | 4 |
| <u>C2CD2</u>         | 1 | 1 | 0 | 1 | 0 | 0 | 0 | 0 | 0 | 1 | 4 |
| <u>CHMP2B</u>        | 1 | 1 | 0 | 1 | 0 | 0 | 0 | 0 | 0 | 1 | 4 |
| <u>DAK</u>           | 1 | 1 | 0 | 1 | 0 | 0 | 0 | 0 | 0 | 1 | 4 |
| <u>ZZZ3</u>          | 1 | 1 | 0 | 1 | 0 | 0 | 0 | 0 | 0 | 1 | 4 |
| <u>ODZ4</u>          | 1 | 1 | 0 | 1 | 0 | 0 | 0 | 0 | 0 | 1 | 4 |
| <u>L3MBTL</u>        | 1 | 1 | 0 | 1 | 0 | 0 | 0 | 0 | 0 | 1 | 4 |
| <u>SUSD5</u>         | 1 | 1 | 0 | 1 | 0 | 0 | 0 | 0 | 0 | 1 | 4 |
| <u>ATRNL1</u>        | 1 | 1 | 0 | 1 | 0 | 0 | 0 | 0 | 0 | 1 | 4 |
| <u>PIP3-E</u>        | 1 | 1 | 0 | 1 | 0 | 0 | 0 | 0 | 0 | 1 | 4 |

|          |   |   |   |   |   |   |   |   |   |   |   |
|----------|---|---|---|---|---|---|---|---|---|---|---|
| ZNF294   | 1 | 1 | 0 | 1 | 0 | 0 | 0 | 0 | 0 | 1 | 4 |
| KIAA0888 | 1 | 1 | 0 | 1 | 0 | 0 | 0 | 0 | 0 | 1 | 4 |
| AUTS2    | 1 | 1 | 0 | 1 | 0 | 0 | 0 | 0 | 0 | 1 | 4 |
| ERC2     | 1 | 1 | 0 | 1 | 0 | 0 | 0 | 0 | 0 | 1 | 4 |
| KLK13    | 1 | 1 | 0 | 1 | 0 | 0 | 0 | 0 | 0 | 1 | 4 |
| WDR21A   | 1 | 1 | 0 | 1 | 0 | 0 | 0 | 0 | 0 | 1 | 4 |
| TANC2    | 1 | 1 | 0 | 1 | 0 | 0 | 0 | 0 | 0 | 1 | 4 |
| WSB1     | 1 | 0 | 0 | 1 | 1 | 0 | 0 | 0 | 0 | 1 | 4 |
| TCTN3    | 1 | 1 | 0 | 1 | 0 | 0 | 0 | 0 | 0 | 1 | 4 |
| TTLL3    | 1 | 1 | 0 | 1 | 0 | 0 | 0 | 0 | 0 | 1 | 4 |
| FBXW2    | 1 | 1 | 0 | 1 | 0 | 0 | 0 | 0 | 0 | 1 | 4 |
| PTPN22   | 1 | 1 | 0 | 1 | 0 | 0 | 0 | 0 | 0 | 1 | 4 |
| FBXL3    | 1 | 1 | 0 | 1 | 0 | 0 | 0 | 0 | 0 | 1 | 4 |
| ARL5A    | 1 | 0 | 0 | 1 | 1 | 0 | 0 | 0 | 0 | 1 | 4 |
| GATA2    | 1 | 1 | 0 | 1 | 0 | 0 | 0 | 0 | 0 | 1 | 4 |
| PLDN     | 1 | 1 | 0 | 1 | 0 | 0 | 0 | 0 | 0 | 1 | 4 |
| FBXO5    | 1 | 1 | 0 | 1 | 0 | 0 | 0 | 0 | 0 | 1 | 4 |
| VPS33B   | 1 | 1 | 0 | 1 | 0 | 0 | 0 | 0 | 0 | 1 | 4 |
| EHF      | 1 | 1 | 0 | 1 | 0 | 0 | 0 | 0 | 0 | 1 | 4 |
| LHX6     | 1 | 1 | 0 | 1 | 0 | 0 | 0 | 0 | 0 | 1 | 4 |
| LHX6     | 1 | 1 | 0 | 1 | 0 | 0 | 0 | 0 | 0 | 1 | 4 |
| CNNM3    | 1 | 1 | 0 | 1 | 0 | 0 | 0 | 0 | 0 | 1 | 4 |
| GCNT2    | 1 | 1 | 0 | 1 | 0 | 0 | 0 | 0 | 0 | 1 | 4 |
| LATS2    | 1 | 1 | 0 | 1 | 0 | 0 | 0 | 0 | 0 | 1 | 4 |
| CKAP2    | 1 | 1 | 0 | 1 | 0 | 0 | 0 | 0 | 0 | 1 | 4 |
| MSTN     | 1 | 1 | 0 | 1 | 0 | 0 | 0 | 0 | 0 | 1 | 4 |
| GDI1     | 1 | 1 | 0 | 1 | 0 | 0 | 0 | 0 | 0 | 1 | 4 |
| MDGA1    | 1 | 1 | 0 | 1 | 0 | 0 | 0 | 0 | 0 | 1 | 4 |
| NUFIP1   | 1 | 1 | 0 | 1 | 0 | 0 | 0 | 0 | 0 | 1 | 4 |
| RPS6KC1  | 1 | 1 | 0 | 1 | 0 | 0 | 0 | 0 | 0 | 1 | 4 |
| GGT7     | 1 | 1 | 0 | 1 | 1 | 0 | 0 | 0 | 0 | 0 | 4 |
| CHORDC1  | 1 | 1 | 0 | 1 | 0 | 0 | 0 | 0 | 0 | 1 | 4 |
| ACAD8    | 1 | 1 | 0 | 1 | 0 | 0 | 0 | 0 | 0 | 1 | 4 |
| D4S234E  | 1 | 1 | 0 | 1 | 0 | 0 | 0 | 0 | 0 | 1 | 4 |
| GHITM    | 1 | 1 | 0 | 1 | 0 | 0 | 0 | 0 | 0 | 1 | 4 |
| VPS41    | 1 | 1 | 0 | 1 | 0 | 0 | 0 | 0 | 0 | 1 | 4 |
| TAF5L    | 1 | 1 | 0 | 1 | 0 | 0 | 0 | 0 | 0 | 1 | 4 |
| GK       | 1 | 1 | 0 | 1 | 0 | 0 | 0 | 0 | 0 | 1 | 4 |
| CACYBP   | 1 | 1 | 0 | 1 | 0 | 0 | 0 | 0 | 0 | 1 | 4 |
| EIF2AK1  | 1 | 1 | 0 | 1 | 0 | 0 | 0 | 0 | 0 | 1 | 4 |
| TMEM28   | 1 | 1 | 0 | 1 | 1 | 0 | 0 | 0 | 0 | 0 | 4 |

|                 |   |   |   |   |   |   |   |   |   |   |   |
|-----------------|---|---|---|---|---|---|---|---|---|---|---|
| <u>SNX5</u>     | 1 | 1 | 0 | 1 | 0 | 0 | 0 | 0 | 0 | 1 | 4 |
| <u>ASAH1</u>    | 1 | 1 | 0 | 1 | 0 | 0 | 0 | 0 | 0 | 1 | 4 |
| <u>ASAH1</u>    | 1 | 1 | 0 | 1 | 0 | 0 | 0 | 0 | 0 | 1 | 4 |
| <u>DISC1</u>    | 1 | 1 | 0 | 1 | 0 | 0 | 0 | 0 | 0 | 1 | 4 |
| <u>DISC1</u>    | 1 | 1 | 0 | 1 | 0 | 0 | 0 | 0 | 0 | 1 | 4 |
| <u>OXGR1</u>    | 1 | 1 | 0 | 1 | 0 | 0 | 0 | 0 | 0 | 1 | 4 |
| <u>COO2</u>     | 1 | 1 | 0 | 1 | 0 | 0 | 0 | 0 | 0 | 1 | 4 |
| <u>ARFIP1</u>   | 1 | 1 | 0 | 1 | 0 | 0 | 0 | 0 | 0 | 1 | 4 |
| <u>BBS9</u>     | 1 | 1 | 0 | 1 | 0 | 0 | 0 | 0 | 0 | 1 | 4 |
| <u>ZNF364</u>   | 1 | 1 | 0 | 1 | 0 | 0 | 0 | 0 | 0 | 1 | 4 |
| <u>ZNF544</u>   | 1 | 1 | 0 | 1 | 0 | 0 | 0 | 0 | 0 | 1 | 4 |
| <u>PCDH11X</u>  | 1 | 1 | 0 | 1 | 0 | 0 | 0 | 0 | 0 | 1 | 4 |
| <u>POLM</u>     | 1 | 1 | 0 | 1 | 0 | 0 | 0 | 0 | 0 | 1 | 4 |
| <u>GLRX</u>     | 1 | 1 | 0 | 1 | 0 | 0 | 0 | 0 | 0 | 1 | 4 |
| <u>GLRX</u>     | 1 | 1 | 0 | 1 | 0 | 0 | 0 | 0 | 0 | 1 | 4 |
| <u>GNA12</u>    | 1 | 1 | 0 | 1 | 0 | 0 | 0 | 0 | 0 | 1 | 4 |
| <u>GNS</u>      | 1 | 1 | 0 | 1 | 0 | 0 | 0 | 0 | 0 | 1 | 4 |
| <u>GOLGA3</u>   | 1 | 1 | 0 | 1 | 0 | 0 | 0 | 0 | 0 | 1 | 4 |
| <u>GOT1</u>     | 1 | 1 | 0 | 1 | 0 | 0 | 0 | 0 | 0 | 1 | 4 |
| <u>GP5</u>      | 1 | 1 | 0 | 1 | 0 | 0 | 0 | 0 | 0 | 1 | 4 |
| <u>GPD2</u>     | 1 | 1 | 0 | 1 | 0 | 0 | 0 | 0 | 0 | 1 | 4 |
| <u>GPLD1</u>    | 1 | 1 | 0 | 1 | 0 | 0 | 0 | 0 | 0 | 1 | 4 |
| <u>GPM6A</u>    | 1 | 1 | 0 | 1 | 0 | 0 | 0 | 0 | 0 | 1 | 4 |
| <u>WDR51B</u>   | 1 | 1 | 0 | 1 | 0 | 0 | 0 | 0 | 0 | 1 | 4 |
| <u>STK32C</u>   | 1 | 1 | 0 | 1 | 0 | 0 | 0 | 0 | 0 | 1 | 4 |
| <u>BLOC1S2</u>  | 1 | 1 | 0 | 1 | 0 | 0 | 0 | 0 | 0 | 1 | 4 |
| <u>PGM2L1</u>   | 1 | 1 | 0 | 1 | 0 | 0 | 0 | 0 | 0 | 1 | 4 |
| <u>DPY19L2</u>  | 1 | 1 | 0 | 1 | 0 | 0 | 0 | 0 | 0 | 1 | 4 |
| <u>GPR137C</u>  | 1 | 1 | 0 | 1 | 0 | 0 | 0 | 0 | 0 | 1 | 4 |
| <u>PRTG</u>     | 1 | 1 | 0 | 1 | 0 | 0 | 0 | 0 | 0 | 1 | 4 |
| <u>FAM100B</u>  | 1 | 1 | 0 | 1 | 0 | 0 | 0 | 0 | 0 | 1 | 4 |
| <u>TMEM105</u>  | 1 | 1 | 0 | 1 | 0 | 0 | 0 | 0 | 0 | 1 | 4 |
| <u>ZADH2</u>    | 1 | 1 | 0 | 1 | 0 | 0 | 0 | 0 | 0 | 1 | 4 |
| <u>ZNF547</u>   | 1 | 1 | 0 | 1 | 0 | 0 | 0 | 0 | 0 | 1 | 4 |
| <u>ZNF776</u>   | 1 | 1 | 0 | 1 | 0 | 0 | 0 | 0 | 0 | 1 | 4 |
| <u>C19orf54</u> | 1 | 1 | 0 | 1 | 0 | 0 | 0 | 0 | 0 | 1 | 4 |
| <u>ZNF575</u>   | 1 | 1 | 0 | 1 | 0 | 0 | 0 | 0 | 0 | 1 | 4 |
| <u>GPR22</u>    | 1 | 1 | 0 | 1 | 0 | 0 | 0 | 0 | 0 | 1 | 4 |
| <u>FAM102B</u>  | 1 | 1 | 0 | 1 | 0 | 0 | 0 | 0 | 0 | 1 | 4 |
| <u>SYPL2</u>    | 1 | 1 | 0 | 1 | 0 | 0 | 0 | 0 | 0 | 1 | 4 |
| <u>ZNF326</u>   | 1 | 1 | 0 | 1 | 0 | 0 | 0 | 0 | 0 | 1 | 4 |

|                  |   |   |   |   |   |   |   |   |   |   |   |
|------------------|---|---|---|---|---|---|---|---|---|---|---|
| <u>RABL3</u>     | 1 | 1 | 0 | 1 | 0 | 0 | 0 | 0 | 0 | 1 | 4 |
| <u>C3orf23</u>   | 1 | 1 | 0 | 1 | 0 | 0 | 0 | 0 | 0 | 1 | 4 |
| <u>GPRIN3</u>    | 1 | 1 | 0 | 1 | 0 | 0 | 0 | 0 | 0 | 1 | 4 |
| <u>C5orf36</u>   | 1 | 1 | 0 | 1 | 0 | 0 | 0 | 0 | 0 | 1 | 4 |
| <u>LOC285636</u> | 1 | 1 | 0 | 1 | 0 | 0 | 0 | 0 | 0 | 1 | 4 |
| <u>SFRS12IP1</u> | 1 | 1 | 0 | 1 | 0 | 0 | 0 | 0 | 0 | 1 | 4 |
| <u>TREML4</u>    | 1 | 1 | 0 | 1 | 0 | 0 | 0 | 0 | 0 | 1 | 4 |
| <u>ANK1</u>      | 1 | 1 | 0 | 1 | 0 | 0 | 0 | 0 | 0 | 1 | 4 |
| <u>EFHA2</u>     | 1 | 1 | 0 | 1 | 0 | 0 | 0 | 0 | 0 | 1 | 4 |
| <u>ATP11C</u>    | 1 | 1 | 0 | 1 | 0 | 0 | 0 | 0 | 0 | 1 | 4 |
| <u>ILDR1</u>     | 1 | 1 | 0 | 1 | 0 | 0 | 0 | 0 | 0 | 1 | 4 |
| <u>MKKN2</u>     | 1 | 1 | 0 | 1 | 0 | 0 | 0 | 0 | 0 | 1 | 4 |
| <u>GRB10</u>     | 1 | 1 | 0 | 1 | 0 | 0 | 0 | 0 | 0 | 1 | 4 |
| <u>OSTM1</u>     | 1 | 1 | 0 | 1 | 0 | 0 | 0 | 0 | 0 | 1 | 4 |
| <u>MRPS18B</u>   | 1 | 1 | 0 | 1 | 0 | 0 | 0 | 0 | 0 | 1 | 4 |
| <u>TMEM14A</u>   | 1 | 1 | 0 | 1 | 0 | 0 | 0 | 0 | 0 | 1 | 4 |
| <u>C16orf72</u>  | 1 | 1 | 0 | 1 | 0 | 0 | 0 | 0 | 0 | 1 | 4 |
| <u>NR3C1</u>     | 1 | 1 | 0 | 1 | 0 | 0 | 0 | 0 | 0 | 1 | 4 |
| <u>NR3C1</u>     | 1 | 1 | 0 | 1 | 0 | 0 | 0 | 0 | 0 | 1 | 4 |
| <u>HSPC159</u>   | 1 | 1 | 0 | 1 | 0 | 0 | 0 | 0 | 0 | 1 | 4 |
| <u>SLC25A4</u>   | 1 | 1 | 0 | 1 | 0 | 0 | 0 | 0 | 0 | 1 | 4 |
| <u>RNASEN</u>    | 1 | 1 | 0 | 1 | 0 | 0 | 0 | 0 | 0 | 1 | 4 |
| <u>GRM1</u>      | 1 | 1 | 0 | 1 | 0 | 0 | 0 | 0 | 0 | 1 | 4 |
| <u>GRM1</u>      | 1 | 1 | 0 | 1 | 0 | 0 | 0 | 0 | 0 | 1 | 4 |
| <u>GRM5</u>      | 0 | 0 | 0 | 1 | 1 | 1 | 0 | 0 | 0 | 1 | 4 |
| <u>GRM8</u>      | 0 | 1 | 0 | 1 | 1 | 1 | 0 | 0 | 0 | 0 | 4 |
| <u>CXCL2</u>     | 1 | 1 | 0 | 1 | 0 | 0 | 0 | 0 | 0 | 1 | 4 |
| <u>GTF2E1</u>    | 1 | 1 | 0 | 1 | 0 | 0 | 0 | 0 | 0 | 1 | 4 |
| <u>GTF2H1</u>    | 1 | 1 | 0 | 1 | 0 | 0 | 0 | 0 | 0 | 1 | 4 |
| <u>GUCA1B</u>    | 1 | 1 | 0 | 1 | 0 | 0 | 0 | 0 | 0 | 1 | 4 |
| <u>YPEL1</u>     | 1 | 1 | 0 | 1 | 0 | 0 | 0 | 0 | 0 | 1 | 4 |
| <u>TFCP2L1</u>   | 1 | 1 | 0 | 1 | 0 | 0 | 0 | 0 | 0 | 1 | 4 |
| <u>HIG2</u>      | 1 | 1 | 0 | 1 | 0 | 0 | 0 | 0 | 0 | 1 | 4 |
| <u>GYPA</u>      | 1 | 1 | 0 | 1 | 0 | 0 | 0 | 0 | 0 | 1 | 4 |
| <u>DSE</u>       | 1 | 1 | 0 | 1 | 0 | 0 | 0 | 0 | 0 | 1 | 4 |
| <u>SLC25A24</u>  | 1 | 1 | 0 | 1 | 0 | 0 | 0 | 0 | 0 | 1 | 4 |
| <u>DMGDH</u>     | 1 | 1 | 0 | 1 | 0 | 0 | 0 | 0 | 0 | 1 | 4 |
| <u>H3F3B</u>     | 1 | 1 | 0 | 1 | 0 | 0 | 0 | 0 | 0 | 1 | 4 |
| <u>HTT</u>       | 1 | 1 | 0 | 1 | 0 | 0 | 0 | 0 | 0 | 1 | 4 |
| <u>EMR2</u>      | 1 | 1 | 0 | 1 | 0 | 0 | 0 | 0 | 0 | 1 | 4 |
| <u>ANXA6</u>     | 1 | 1 | 0 | 1 | 0 | 0 | 0 | 0 | 0 | 1 | 4 |



|                 |   |   |   |   |   |   |   |   |   |   |   |
|-----------------|---|---|---|---|---|---|---|---|---|---|---|
| <u>HK2</u>      | 1 | 1 | 0 | 1 | 0 | 0 | 0 | 0 | 0 | 1 | 4 |
| <u>HLA-C</u>    | 1 | 1 | 0 | 1 | 0 | 0 | 0 | 0 | 0 | 1 | 4 |
| <u>ANXA11</u>   | 1 | 1 | 0 | 1 | 0 | 0 | 0 | 0 | 0 | 1 | 4 |
| <u>HMGB2</u>    | 1 | 1 | 0 | 1 | 0 | 0 | 0 | 0 | 0 | 1 | 4 |
| <u>HMGB3</u>    | 1 | 1 | 0 | 1 | 0 | 0 | 0 | 0 | 0 | 1 | 4 |
| <u>HMGCL</u>    | 1 | 1 | 0 | 1 | 0 | 0 | 0 | 0 | 0 | 1 | 4 |
| <u>HNF4G</u>    | 1 | 1 | 0 | 1 | 0 | 0 | 0 | 0 | 0 | 1 | 4 |
| <u>HNMT</u>     | 1 | 1 | 0 | 1 | 0 | 0 | 0 | 0 | 0 | 1 | 4 |
| <u>HNRNPC</u>   | 1 | 1 | 0 | 1 | 0 | 0 | 0 | 0 | 0 | 1 | 4 |
| <u>HOXA1</u>    | 1 | 1 | 0 | 1 | 0 | 0 | 0 | 0 | 0 | 1 | 4 |
| <u>HOXA1</u>    | 1 | 1 | 0 | 1 | 0 | 0 | 0 | 0 | 0 | 1 | 4 |
| <u>ACACB</u>    | 1 | 1 | 0 | 1 | 0 | 0 | 0 | 0 | 0 | 1 | 4 |
| <u>HOXB4</u>    | 1 | 1 | 0 | 1 | 0 | 0 | 0 | 0 | 0 | 1 | 4 |
| <u>HOXC11</u>   | 1 | 1 | 0 | 1 | 0 | 0 | 0 | 0 | 0 | 1 | 4 |
| <u>HOXD1</u>    | 1 | 1 | 0 | 1 | 0 | 0 | 0 | 0 | 0 | 1 | 4 |
| <u>HOXD3</u>    | 1 | 1 | 0 | 1 | 0 | 0 | 0 | 0 | 0 | 1 | 4 |
| <u>HPGD</u>     | 1 | 1 | 0 | 1 | 0 | 0 | 0 | 0 | 0 | 1 | 4 |
| <u>HRB</u>      | 1 | 0 | 0 | 1 | 1 | 0 | 0 | 0 | 0 | 1 | 4 |
| <u>HRBL</u>     | 1 | 1 | 0 | 1 | 0 | 0 | 0 | 0 | 0 | 1 | 4 |
| <u>HRH1</u>     | 1 | 1 | 0 | 1 | 0 | 0 | 0 | 0 | 0 | 1 | 4 |
| <u>HSD3B1</u>   | 1 | 1 | 0 | 1 | 0 | 0 | 0 | 0 | 0 | 1 | 4 |
| <u>HSD11B1</u>  | 1 | 1 | 0 | 1 | 0 | 0 | 0 | 0 | 0 | 1 | 4 |
| <u>HSPA1L</u>   | 1 | 1 | 0 | 1 | 0 | 0 | 0 | 0 | 0 | 1 | 4 |
| <u>XIAP</u>     | 1 | 1 | 0 | 1 | 0 | 0 | 0 | 0 | 0 | 1 | 4 |
| <u>BIRC5</u>    | 1 | 1 | 0 | 1 | 0 | 0 | 0 | 0 | 0 | 1 | 4 |
| <u>BIRC5</u>    | 1 | 1 | 0 | 1 | 0 | 0 | 0 | 0 | 0 | 1 | 4 |
| <u>DNAJB1</u>   | 1 | 1 | 0 | 1 | 0 | 0 | 0 | 0 | 0 | 1 | 4 |
| <u>HTR2C</u>    | 1 | 1 | 0 | 1 | 0 | 0 | 0 | 0 | 0 | 1 | 4 |
| <u>IRF8</u>     | 1 | 1 | 0 | 1 | 0 | 0 | 0 | 0 | 0 | 1 | 4 |
| <u>TMEM173</u>  | 1 | 1 | 0 | 1 | 0 | 0 | 0 | 0 | 0 | 1 | 4 |
| <u>MYLK4</u>    | 1 | 1 | 0 | 1 | 0 | 0 | 0 | 0 | 0 | 1 | 4 |
| <u>KIAA2022</u> | 1 | 1 | 0 | 1 | 0 | 0 | 0 | 0 | 0 | 1 | 4 |
| <u>ZC3H12B</u>  | 1 | 1 | 0 | 1 | 0 | 0 | 0 | 0 | 0 | 1 | 4 |
| <u>IDH1</u>     | 1 | 1 | 0 | 1 | 0 | 0 | 0 | 0 | 0 | 1 | 4 |
| <u>IDH3A</u>    | 1 | 1 | 0 | 1 | 0 | 0 | 0 | 0 | 0 | 1 | 4 |
| <u>GLDN</u>     | 1 | 1 | 0 | 1 | 0 | 0 | 0 | 0 | 0 | 1 | 4 |
| <u>ZNF677</u>   | 1 | 1 | 0 | 1 | 0 | 0 | 0 | 0 | 0 | 1 | 4 |
| <u>ZSCAN22</u>  | 1 | 1 | 0 | 1 | 0 | 0 | 0 | 0 | 0 | 1 | 4 |
| <u>PLCXD3</u>   | 1 | 1 | 0 | 1 | 0 | 0 | 0 | 0 | 0 | 1 | 4 |
| <u>IFNG</u>     | 1 | 1 | 0 | 1 | 0 | 0 | 0 | 0 | 0 | 1 | 4 |
| <u>ZNF81</u>    | 1 | 1 | 0 | 1 | 0 | 0 | 0 | 0 | 0 | 1 | 4 |

|                 |   |   |   |   |   |   |   |   |   |   |   |
|-----------------|---|---|---|---|---|---|---|---|---|---|---|
| <u>IGF1</u>     | 1 | 1 | 0 | 1 | 0 | 0 | 0 | 0 | 0 | 1 | 4 |
| <u>IGF1</u>     | 1 | 1 | 0 | 1 | 0 | 0 | 0 | 0 | 0 | 1 | 4 |
| <u>FAM33A</u>   | 1 | 1 | 0 | 1 | 0 | 0 | 0 | 0 | 0 | 1 | 4 |
| <u>FAM33A</u>   | 1 | 1 | 0 | 1 | 0 | 0 | 0 | 0 | 0 | 1 | 4 |
| <u>ICHTHYIN</u> | 1 | 1 | 0 | 1 | 0 | 0 | 0 | 0 | 0 | 1 | 4 |
| <u>HCN1</u>     | 1 | 1 | 0 | 1 | 0 | 0 | 0 | 0 | 0 | 1 | 4 |
| <u>BMP8A</u>    | 1 | 1 | 0 | 1 | 0 | 0 | 0 | 0 | 0 | 1 | 4 |
| <u>FAS</u>      | 1 | 1 | 0 | 1 | 0 | 0 | 0 | 0 | 0 | 1 | 4 |
| <u>FAS</u>      | 1 | 1 | 0 | 1 | 0 | 0 | 0 | 0 | 0 | 1 | 4 |
| <u>IL1B</u>     | 1 | 1 | 0 | 1 | 0 | 0 | 0 | 0 | 0 | 1 | 4 |
| <u>IL1R1</u>    | 1 | 1 | 0 | 1 | 0 | 0 | 0 | 0 | 0 | 1 | 4 |
| <u>IL1RAP</u>   | 1 | 1 | 0 | 1 | 0 | 0 | 0 | 0 | 0 | 1 | 4 |
| <u>IL1RAP</u>   | 1 | 1 | 0 | 1 | 0 | 0 | 0 | 0 | 0 | 1 | 4 |
| <u>IL2</u>      | 1 | 1 | 0 | 1 | 0 | 0 | 0 | 0 | 0 | 1 | 4 |
| <u>FASLG</u>    | 1 | 1 | 0 | 1 | 0 | 0 | 0 | 0 | 0 | 1 | 4 |
| <u>IL7</u>      | 1 | 1 | 0 | 1 | 0 | 0 | 0 | 0 | 0 | 1 | 4 |
| <u>IL10RA</u>   | 1 | 1 | 0 | 1 | 0 | 0 | 0 | 0 | 0 | 1 | 4 |
| <u>AQP2</u>     | 1 | 1 | 0 | 1 | 0 | 0 | 0 | 0 | 0 | 1 | 4 |
| <u>FAM101B</u>  | 1 | 1 | 0 | 1 | 0 | 0 | 0 | 0 | 0 | 1 | 4 |
| <u>ZBTB41</u>   | 1 | 1 | 0 | 1 | 0 | 0 | 0 | 0 | 0 | 1 | 4 |
| <u>IL16</u>     | 1 | 1 | 0 | 1 | 0 | 0 | 0 | 0 | 0 | 1 | 4 |
| <u>ILF3</u>     | 1 | 1 | 0 | 1 | 0 | 0 | 0 | 0 | 0 | 1 | 4 |
| <u>AQP4</u>     | 1 | 1 | 0 | 1 | 0 | 0 | 0 | 0 | 0 | 1 | 4 |
| <u>IMPG1</u>    | 1 | 1 | 0 | 1 | 0 | 0 | 0 | 0 | 0 | 1 | 4 |
| <u>INCENP</u>   | 1 | 1 | 0 | 1 | 0 | 0 | 0 | 0 | 0 | 1 | 4 |
| <u>INSR</u>     | 1 | 1 | 0 | 1 | 0 | 0 | 0 | 0 | 0 | 1 | 4 |
| <u>ITGA6</u>    | 1 | 1 | 0 | 1 | 0 | 0 | 0 | 0 | 0 | 1 | 4 |
| <u>IREB2</u>    | 1 | 1 | 0 | 1 | 0 | 0 | 0 | 0 | 0 | 1 | 4 |
| <u>AQP9</u>     | 1 | 1 | 0 | 1 | 0 | 0 | 0 | 0 | 0 | 1 | 4 |
| <u>ITPR2</u>    | 1 | 1 | 0 | 1 | 0 | 0 | 0 | 0 | 0 | 1 | 4 |
| <u>JAK2</u>     | 1 | 1 | 0 | 1 | 0 | 0 | 0 | 0 | 0 | 1 | 4 |
| <u>KCNA1</u>    | 1 | 1 | 0 | 1 | 0 | 0 | 0 | 0 | 0 | 1 | 4 |
| <u>KCNB1</u>    | 1 | 1 | 0 | 1 | 0 | 0 | 0 | 0 | 0 | 1 | 4 |
| <u>SFT2D2</u>   | 1 | 1 | 0 | 1 | 0 | 0 | 0 | 0 | 0 | 1 | 4 |
| <u>C3orf62</u>  | 1 | 1 | 0 | 1 | 0 | 0 | 0 | 0 | 0 | 1 | 4 |
| <u>KCNJ1</u>    | 1 | 1 | 0 | 1 | 0 | 0 | 0 | 0 | 0 | 1 | 4 |
| <u>KCNJ2</u>    | 1 | 1 | 0 | 1 | 0 | 0 | 0 | 0 | 0 | 1 | 4 |
| <u>KCNJ5</u>    | 1 | 1 | 0 | 1 | 0 | 0 | 0 | 0 | 0 | 1 | 4 |
| <u>KCNJ10</u>   | 1 | 1 | 0 | 1 | 0 | 0 | 0 | 0 | 0 | 1 | 4 |
| <u>CA13</u>     | 1 | 1 | 0 | 1 | 0 | 0 | 0 | 0 | 0 | 1 | 4 |
| <u>KCNMA1</u>   | 1 | 1 | 0 | 1 | 0 | 0 | 0 | 0 | 0 | 1 | 4 |

|                  |   |   |   |   |   |   |   |   |   |   |   |
|------------------|---|---|---|---|---|---|---|---|---|---|---|
| <u>KCNN1</u>     | 1 | 1 | 0 | 1 | 0 | 0 | 0 | 0 | 0 | 1 | 4 |
| <u>KIF5A</u>     | 1 | 1 | 0 | 1 | 0 | 0 | 0 | 0 | 0 | 1 | 4 |
| <u>KIF5C</u>     | 1 | 1 | 0 | 1 | 0 | 0 | 0 | 0 | 0 | 1 | 4 |
| <u>KPNA4</u>     | 1 | 1 | 0 | 1 | 0 | 0 | 0 | 0 | 0 | 1 | 4 |
| <u>TNPO1</u>     | 1 | 1 | 0 | 1 | 0 | 0 | 0 | 0 | 0 | 1 | 4 |
| <u>RANBP5</u>    | 1 | 1 | 0 | 1 | 0 | 0 | 0 | 0 | 0 | 1 | 4 |
| <u>C6orf190</u>  | 1 | 1 | 0 | 1 | 0 | 0 | 0 | 0 | 0 | 1 | 4 |
| <u>SH2D4B</u>    | 1 | 1 | 0 | 1 | 0 | 0 | 0 | 0 | 0 | 1 | 4 |
| <u>LOC387856</u> | 1 | 1 | 0 | 1 | 0 | 0 | 0 | 0 | 0 | 1 | 4 |
| <u>NHLRC3</u>    | 1 | 1 | 0 | 1 | 0 | 0 | 0 | 0 | 0 | 1 | 4 |
| <u>C15orf52</u>  | 1 | 1 | 0 | 1 | 0 | 0 | 0 | 0 | 0 | 1 | 4 |
| <u>SBK1</u>      | 1 | 1 | 0 | 1 | 0 | 0 | 0 | 0 | 0 | 1 | 4 |
| <u>YPEL2</u>     | 1 | 1 | 0 | 1 | 0 | 0 | 0 | 0 | 0 | 1 | 4 |
| <u>VGLL3</u>     | 1 | 1 | 0 | 1 | 0 | 0 | 0 | 0 | 0 | 1 | 4 |
| <u>CCDC4</u>     | 1 | 1 | 0 | 1 | 0 | 0 | 0 | 0 | 0 | 1 | 4 |
| <u>IYD</u>       | 1 | 1 | 0 | 1 | 0 | 0 | 0 | 0 | 0 | 1 | 4 |
| <u>RHOG</u>      | 1 | 1 | 0 | 1 | 0 | 0 | 0 | 0 | 0 | 1 | 4 |
| <u>LAMC1</u>     | 1 | 1 | 0 | 1 | 0 | 0 | 0 | 0 | 0 | 1 | 4 |
| <u>LBR</u>       | 1 | 0 | 0 | 1 | 1 | 0 | 0 | 0 | 0 | 1 | 4 |
| <u>ARHGAP5</u>   | 1 | 1 | 0 | 1 | 0 | 0 | 0 | 0 | 0 | 1 | 4 |
| <u>LDLR</u>      | 1 | 1 | 0 | 1 | 0 | 0 | 0 | 0 | 0 | 1 | 4 |
| <u>LIF</u>       | 1 | 1 | 0 | 1 | 0 | 0 | 0 | 0 | 0 | 1 | 4 |
| <u>LIFR</u>      | 1 | 1 | 0 | 1 | 0 | 0 | 0 | 0 | 0 | 1 | 4 |
| <u>ABLIM1</u>    | 1 | 1 | 0 | 1 | 0 | 0 | 0 | 0 | 0 | 1 | 4 |
| <u>FADS1</u>     | 1 | 1 | 0 | 1 | 0 | 0 | 0 | 0 | 0 | 1 | 4 |
| <u>FAM102A</u>   | 1 | 1 | 0 | 1 | 0 | 0 | 0 | 0 | 0 | 1 | 4 |
| <u>LMAN1</u>     | 1 | 1 | 0 | 1 | 0 | 0 | 0 | 0 | 0 | 1 | 4 |
| <u>ARL1</u>      | 1 | 1 | 0 | 1 | 0 | 0 | 0 | 0 | 0 | 1 | 4 |
| <u>LOC400120</u> | 1 | 1 | 0 | 1 | 0 | 0 | 0 | 0 | 0 | 1 | 4 |
| <u>C15orf54</u>  | 1 | 1 | 0 | 1 | 0 | 0 | 0 | 0 | 0 | 1 | 4 |
| <u>SAMD12</u>    | 1 | 1 | 0 | 1 | 0 | 0 | 0 | 0 | 0 | 1 | 4 |
| <u>SAMD12</u>    | 1 | 1 | 0 | 1 | 0 | 0 | 0 | 0 | 0 | 1 | 4 |
| <u>SNX30</u>     | 1 | 1 | 0 | 1 | 0 | 0 | 0 | 0 | 0 | 1 | 4 |
| <u>MCART6</u>    | 1 | 1 | 0 | 1 | 0 | 0 | 0 | 0 | 0 | 1 | 4 |
| <u>C10orf132</u> | 1 | 1 | 0 | 1 | 0 | 0 | 0 | 0 | 0 | 1 | 4 |
| <u>ARL3</u>      | 1 | 1 | 0 | 1 | 0 | 0 | 0 | 0 | 0 | 1 | 4 |
| <u>ZBTB34</u>    | 1 | 1 | 0 | 1 | 0 | 0 | 0 | 0 | 0 | 1 | 4 |
| <u>LRP4</u>      | 1 | 1 | 0 | 1 | 0 | 0 | 0 | 0 | 0 | 1 | 4 |
| <u>HAPLN4</u>    | 1 | 1 | 0 | 1 | 0 | 0 | 0 | 0 | 0 | 1 | 4 |
| <u>LTBP2</u>     | 1 | 1 | 0 | 1 | 0 | 0 | 0 | 0 | 0 | 1 | 4 |
| <u>CAPRN1</u>    | 1 | 1 | 0 | 1 | 0 | 0 | 0 | 0 | 0 | 1 | 4 |

|               |   |   |   |   |   |   |   |   |   |   |   |
|---------------|---|---|---|---|---|---|---|---|---|---|---|
| <u>CAPRN1</u> | 1 | 1 | 0 | 1 | 0 | 0 | 0 | 0 | 0 | 1 | 4 |
| <u>SMAD2</u>  | 1 | 1 | 0 | 1 | 0 | 0 | 0 | 0 | 0 | 1 | 4 |
| <u>ARRB2</u>  | 1 | 1 | 0 | 1 | 0 | 0 | 0 | 0 | 0 | 1 | 4 |
| <u>MAF</u>    | 1 | 1 | 0 | 1 | 0 | 0 | 0 | 0 | 0 | 1 | 4 |
| <u>MAGEA4</u> | 1 | 1 | 0 | 1 | 0 | 0 | 0 | 0 | 0 | 1 | 4 |
| <u>STS</u>    | 1 | 1 | 0 | 1 | 0 | 0 | 0 | 0 | 0 | 1 | 4 |
| <u>MAN2A2</u> | 1 | 1 | 0 | 1 | 0 | 0 | 0 | 0 | 0 | 1 | 4 |
| <u>MAOA</u>   | 1 | 1 | 0 | 1 | 0 | 0 | 0 | 0 | 0 | 1 | 4 |
| <u>MAP2</u>   | 1 | 1 | 0 | 1 | 0 | 0 | 0 | 0 | 0 | 1 | 4 |
| <u>MAPT</u>   | 1 | 1 | 0 | 1 | 0 | 0 | 0 | 0 | 0 | 1 | 4 |
| <u>MARK1</u>  | 1 | 1 | 0 | 1 | 0 | 0 | 0 | 0 | 0 | 1 | 4 |
| <u>MBNL1</u>  | 1 | 1 | 0 | 1 | 0 | 0 | 0 | 0 | 0 | 1 | 4 |
| <u>MBP</u>    | 1 | 1 | 0 | 1 | 0 | 0 | 0 | 0 | 0 | 1 | 4 |
| <u>MBP</u>    | 1 | 1 | 0 | 1 | 0 | 0 | 0 | 0 | 0 | 1 | 4 |
| <u>MC2R</u>   | 1 | 1 | 0 | 1 | 0 | 0 | 0 | 0 | 0 | 1 | 4 |
| <u>CHST6</u>  | 1 | 1 | 0 | 1 | 0 | 0 | 0 | 0 | 0 | 1 | 4 |
| <u>MCM6</u>   | 1 | 1 | 0 | 1 | 0 | 0 | 0 | 0 | 0 | 1 | 4 |
| <u>CD46</u>   | 1 | 1 | 0 | 1 | 0 | 0 | 0 | 0 | 0 | 1 | 4 |
| <u>ME2</u>    | 1 | 1 | 0 | 1 | 0 | 0 | 0 | 0 | 0 | 1 | 4 |
| <u>MECP2</u>  | 1 | 0 | 0 | 1 | 1 | 0 | 0 | 0 | 0 | 1 | 4 |
| <u>MEIS2</u>  | 1 | 0 | 0 | 1 | 1 | 1 | 0 | 0 | 0 | 0 | 4 |
| <u>MEIS2</u>  | 1 | 0 | 0 | 1 | 1 | 1 | 0 | 0 | 0 | 0 | 4 |
| <u>MEIS2</u>  | 1 | 0 | 0 | 1 | 1 | 1 | 0 | 0 | 0 | 0 | 4 |
| <u>MEIS2</u>  | 1 | 0 | 0 | 1 | 1 | 1 | 0 | 0 | 0 | 0 | 4 |
| <u>MEIS2</u>  | 1 | 0 | 0 | 1 | 1 | 1 | 0 | 0 | 0 | 0 | 4 |
| <u>MEST</u>   | 1 | 1 | 0 | 1 | 0 | 0 | 0 | 0 | 0 | 1 | 4 |
| <u>KITLG</u>  | 1 | 1 | 0 | 1 | 0 | 0 | 0 | 0 | 0 | 1 | 4 |
| <u>MIP</u>    | 1 | 1 | 0 | 1 | 0 | 0 | 0 | 0 | 0 | 1 | 4 |
| <u>ATXN3</u>  | 1 | 1 | 0 | 1 | 0 | 0 | 0 | 0 | 0 | 1 | 4 |
| <u>MKLN1</u>  | 1 | 1 | 0 | 1 | 0 | 0 | 0 | 0 | 0 | 1 | 4 |
| <u>MLF1</u>   | 1 | 1 | 0 | 1 | 0 | 0 | 0 | 0 | 0 | 1 | 4 |
| <u>MAP3K9</u> | 1 | 1 | 0 | 1 | 0 | 0 | 0 | 0 | 0 | 1 | 4 |
| <u>MMP7</u>   | 1 | 1 | 0 | 1 | 0 | 0 | 0 | 0 | 0 | 1 | 4 |
| <u>MMP8</u>   | 1 | 1 | 0 | 1 | 0 | 0 | 0 | 0 | 0 | 1 | 4 |
| <u>MMP10</u>  | 1 | 1 | 0 | 1 | 0 | 0 | 0 | 0 | 0 | 1 | 4 |
| <u>MOG</u>    | 1 | 1 | 0 | 1 | 0 | 0 | 0 | 0 | 0 | 1 | 4 |
| <u>MOG</u>    | 1 | 1 | 0 | 1 | 0 | 0 | 0 | 0 | 0 | 1 | 4 |
| <u>MOG</u>    | 1 | 1 | 0 | 1 | 0 | 0 | 0 | 0 | 0 | 1 | 4 |
| <u>MOG</u>    | 1 | 1 | 0 | 1 | 0 | 0 | 0 | 0 | 0 | 1 | 4 |
| <u>MOG</u>    | 1 | 1 | 0 | 1 | 0 | 0 | 0 | 0 | 0 | 1 | 4 |
| <u>MPP3</u>   | 1 | 1 | 0 | 1 | 0 | 0 | 0 | 0 | 0 | 1 | 4 |

|                    |   |   |   |   |   |   |   |   |   |   |   |
|--------------------|---|---|---|---|---|---|---|---|---|---|---|
| <u>LOC440087</u>   | 1 | 1 | 0 | 1 | 0 | 0 | 0 | 0 | 0 | 1 | 4 |
| <u>RP11-11C5.2</u> | 1 | 1 | 0 | 1 | 0 | 0 | 0 | 0 | 0 | 1 | 4 |
| <u>CCDC88C</u>     | 1 | 1 | 0 | 1 | 0 | 0 | 0 | 0 | 0 | 1 | 4 |
| <u>MSI1</u>        | 1 | 1 | 0 | 1 | 0 | 0 | 0 | 0 | 0 | 1 | 4 |
| <u>MSR1</u>        | 1 | 1 | 0 | 1 | 0 | 0 | 0 | 0 | 0 | 1 | 4 |
| <u>MTAP</u>        | 1 | 1 | 0 | 1 | 0 | 0 | 0 | 0 | 0 | 1 | 4 |
| <u>MTF1</u>        | 1 | 1 | 0 | 1 | 0 | 0 | 0 | 0 | 0 | 1 | 4 |
| <u>MUC7</u>        | 1 | 1 | 0 | 1 | 0 | 0 | 0 | 0 | 0 | 1 | 4 |
| <u>ASTN1</u>       | 1 | 1 | 0 | 1 | 0 | 0 | 0 | 0 | 0 | 1 | 4 |
| <u>MYBPC1</u>      | 0 | 1 | 0 | 1 | 1 | 1 | 0 | 0 | 0 | 0 | 4 |
| <u>MYCN</u>        | 1 | 1 | 0 | 1 | 1 | 0 | 0 | 0 | 0 | 0 | 4 |
| <u>ZFH3</u>        | 1 | 1 | 0 | 1 | 0 | 0 | 0 | 0 | 0 | 1 | 4 |
| <u>MYO1E</u>       | 1 | 1 | 0 | 1 | 0 | 0 | 0 | 0 | 0 | 1 | 4 |
| <u>MYO5A</u>       | 1 | 1 | 0 | 1 | 0 | 0 | 0 | 0 | 0 | 1 | 4 |
| <u>MYO5B</u>       | 1 | 1 | 0 | 1 | 0 | 0 | 0 | 0 | 0 | 1 | 4 |
| <u>MYO6</u>        | 1 | 1 | 0 | 1 | 0 | 0 | 0 | 0 | 0 | 1 | 4 |
| <u>MYO9B</u>       | 1 | 1 | 0 | 1 | 0 | 0 | 0 | 0 | 0 | 1 | 4 |
| <u>MYO9B</u>       | 1 | 1 | 0 | 1 | 0 | 0 | 0 | 0 | 0 | 1 | 4 |
| <u>PPP1R12B</u>    | 1 | 0 | 0 | 1 | 1 | 0 | 0 | 0 | 0 | 1 | 4 |
| <u>PPP1R12B</u>    | 0 | 1 | 0 | 1 | 1 | 0 | 0 | 0 | 0 | 1 | 4 |
| <u>NBN</u>         | 1 | 1 | 0 | 1 | 0 | 0 | 0 | 0 | 0 | 1 | 4 |
| <u>NCBP1</u>       | 1 | 1 | 0 | 1 | 0 | 0 | 0 | 0 | 0 | 1 | 4 |
| <u>ATM</u>         | 1 | 1 | 0 | 1 | 0 | 0 | 0 | 0 | 0 | 1 | 4 |
| <u>RERE</u>        | 1 | 1 | 0 | 1 | 0 | 0 | 0 | 0 | 0 | 1 | 4 |
| <u>SEPT2</u>       | 1 | 1 | 0 | 1 | 0 | 0 | 0 | 0 | 0 | 1 | 4 |
| <u>NF1</u>         | 1 | 1 | 0 | 1 | 0 | 0 | 0 | 0 | 0 | 1 | 4 |
| <u>NFYB</u>        | 1 | 1 | 0 | 1 | 0 | 0 | 0 | 0 | 0 | 1 | 4 |
| <u>ATP1B2</u>      | 1 | 1 | 0 | 1 | 0 | 0 | 0 | 0 | 0 | 1 | 4 |
| <u>NKTR</u>        | 1 | 1 | 0 | 1 | 0 | 0 | 0 | 0 | 0 | 1 | 4 |
| <u>NKX2-2</u>      | 1 | 1 | 0 | 1 | 1 | 0 | 0 | 0 | 0 | 0 | 4 |
| <u>CNOT2</u>       | 1 | 1 | 0 | 1 | 0 | 0 | 0 | 0 | 0 | 1 | 4 |
| <u>NOTCH2</u>      | 1 | 1 | 0 | 1 | 0 | 0 | 0 | 0 | 0 | 1 | 4 |
| <u>NOTCH4</u>      | 1 | 1 | 0 | 1 | 0 | 0 | 0 | 0 | 0 | 1 | 4 |
| <u>NOVA1</u>       | 0 | 0 | 0 | 1 | 1 | 1 | 0 | 0 | 0 | 1 | 4 |
| <u>NPAT</u>        | 1 | 1 | 0 | 1 | 0 | 0 | 0 | 0 | 0 | 1 | 4 |
| <u>NPM1</u>        | 0 | 1 | 0 | 1 | 1 | 1 | 0 | 0 | 0 | 0 | 4 |
| <u>NRAS</u>        | 1 | 1 | 0 | 1 | 0 | 0 | 0 | 0 | 0 | 1 | 4 |
| <u>NRF1</u>        | 1 | 1 | 0 | 1 | 0 | 0 | 0 | 0 | 0 | 1 | 4 |
| <u>NSF</u>         | 1 | 1 | 0 | 1 | 0 | 0 | 0 | 0 | 0 | 1 | 4 |
| <u>ATP2B3</u>      | 1 | 1 | 0 | 1 | 0 | 0 | 0 | 0 | 0 | 1 | 4 |
| <u>NTS</u>         | 1 | 1 | 0 | 1 | 0 | 0 | 0 | 0 | 0 | 1 | 4 |

|                  |   |   |   |   |   |   |   |   |   |   |   |
|------------------|---|---|---|---|---|---|---|---|---|---|---|
| <u>LOC493869</u> | 1 | 1 | 0 | 1 | 0 | 0 | 0 | 0 | 0 | 1 | 4 |
| <u>OGN</u>       | 1 | 1 | 0 | 1 | 0 | 0 | 0 | 0 | 0 | 1 | 4 |
| <u>TNFRSF11B</u> | 1 | 1 | 0 | 1 | 0 | 0 | 0 | 0 | 0 | 1 | 4 |
| <u>ZNF295</u>    | 1 | 1 | 0 | 1 | 0 | 0 | 0 | 0 | 0 | 1 | 4 |
| <u>OPRK1</u>     | 1 | 1 | 0 | 1 | 0 | 0 | 0 | 0 | 0 | 1 | 4 |
| <u>PEBP1</u>     | 1 | 1 | 0 | 1 | 0 | 0 | 0 | 0 | 0 | 1 | 4 |
| <u>RRM2B</u>     | 1 | 1 | 0 | 1 | 0 | 0 | 0 | 0 | 0 | 1 | 4 |
| <u>MINK1</u>     | 1 | 0 | 0 | 1 | 1 | 0 | 0 | 0 | 0 | 1 | 4 |
| <u>SERPINE1</u>  | 1 | 1 | 0 | 1 | 0 | 0 | 0 | 0 | 0 | 1 | 4 |
| <u>ITSN2</u>     | 1 | 1 | 0 | 1 | 0 | 0 | 0 | 0 | 0 | 1 | 4 |
| <u>PAK2</u>      | 1 | 1 | 0 | 1 | 0 | 0 | 0 | 0 | 0 | 1 | 4 |
| <u>ARHGEF3</u>   | 1 | 1 | 0 | 1 | 0 | 0 | 0 | 0 | 0 | 1 | 4 |
| <u>PARK2</u>     | 1 | 1 | 0 | 1 | 0 | 0 | 0 | 0 | 0 | 1 | 4 |
| <u>PARN</u>      | 1 | 1 | 0 | 1 | 0 | 0 | 0 | 0 | 0 | 1 | 4 |
| <u>PAX5</u>      | 1 | 1 | 0 | 1 | 0 | 0 | 0 | 0 | 0 | 1 | 4 |
| <u>AK3</u>       | 1 | 1 | 0 | 1 | 0 | 0 | 0 | 0 | 0 | 1 | 4 |
| <u>PAX9</u>      | 1 | 1 | 0 | 1 | 0 | 0 | 0 | 0 | 0 | 1 | 4 |
| <u>SPOCK3</u>    | 1 | 1 | 0 | 1 | 0 | 0 | 0 | 0 | 0 | 1 | 4 |
| <u>RNF141</u>    | 1 | 1 | 0 | 1 | 0 | 0 | 0 | 0 | 0 | 1 | 4 |
| <u>PCBP1</u>     | 1 | 1 | 0 | 1 | 1 | 0 | 0 | 0 | 0 | 0 | 4 |
| <u>PDE11A</u>    | 1 | 1 | 0 | 1 | 0 | 0 | 0 | 0 | 0 | 1 | 4 |
| <u>ACOX1</u>     | 1 | 1 | 0 | 1 | 0 | 0 | 0 | 0 | 0 | 1 | 4 |
| <u>SLC35C2</u>   | 1 | 1 | 0 | 1 | 0 | 0 | 0 | 0 | 0 | 1 | 4 |
| <u>ASCC1</u>     | 1 | 1 | 0 | 1 | 0 | 0 | 0 | 0 | 0 | 1 | 4 |
| <u>EXOSC3</u>    | 1 | 1 | 0 | 1 | 0 | 0 | 0 | 0 | 0 | 1 | 4 |
| <u>EXOSC3</u>    | 1 | 1 | 0 | 1 | 0 | 0 | 0 | 0 | 0 | 1 | 4 |
| <u>TMED7</u>     | 1 | 1 | 0 | 1 | 0 | 0 | 0 | 0 | 0 | 1 | 4 |
| <u>RRP15</u>     | 1 | 1 | 0 | 1 | 0 | 0 | 0 | 0 | 0 | 1 | 4 |
| <u>MRPS16</u>    | 1 | 1 | 0 | 1 | 0 | 0 | 0 | 0 | 0 | 1 | 4 |
| <u>VPS36</u>     | 1 | 1 | 0 | 1 | 0 | 0 | 0 | 0 | 0 | 1 | 4 |
| <u>FAM152A</u>   | 1 | 1 | 0 | 1 | 0 | 0 | 0 | 0 | 0 | 1 | 4 |
| <u>ST8SIA3</u>   | 1 | 1 | 0 | 1 | 0 | 0 | 0 | 0 | 0 | 1 | 4 |
| <u>FAM135B</u>   | 1 | 1 | 0 | 1 | 0 | 0 | 0 | 0 | 0 | 1 | 4 |
| <u>TXNDC12</u>   | 1 | 1 | 0 | 1 | 0 | 0 | 0 | 0 | 0 | 1 | 4 |
| <u>KLHL5</u>     | 1 | 1 | 0 | 1 | 0 | 0 | 0 | 0 | 0 | 1 | 4 |
| <u>KLHL5</u>     | 1 | 0 | 0 | 1 | 1 | 0 | 0 | 0 | 0 | 1 | 4 |
| <u>SH3GLB1</u>   | 1 | 1 | 0 | 1 | 0 | 0 | 0 | 0 | 0 | 1 | 4 |
| <u>FAM82B</u>    | 1 | 1 | 0 | 1 | 0 | 0 | 0 | 0 | 0 | 1 | 4 |
| <u>ASB3</u>      | 1 | 1 | 0 | 1 | 0 | 0 | 0 | 0 | 0 | 1 | 4 |
| <u>MYO15A</u>    | 1 | 1 | 0 | 1 | 0 | 0 | 0 | 0 | 0 | 1 | 4 |
| <u>SS18L2</u>    | 1 | 1 | 0 | 1 | 0 | 0 | 0 | 0 | 0 | 1 | 4 |

|                  |   |   |   |   |   |   |   |   |   |   |   |
|------------------|---|---|---|---|---|---|---|---|---|---|---|
| <u>CLDN18</u>    | 1 | 1 | 0 | 1 | 0 | 0 | 0 | 0 | 0 | 1 | 4 |
| <u>PCSK1</u>     | 1 | 1 | 0 | 1 | 0 | 0 | 0 | 0 | 0 | 1 | 4 |
| <u>VRK3</u>      | 1 | 1 | 0 | 1 | 0 | 0 | 0 | 0 | 0 | 1 | 4 |
| <u>PDZD11</u>    | 1 | 1 | 0 | 1 | 0 | 0 | 0 | 0 | 0 | 1 | 4 |
| <u>ZNF571</u>    | 1 | 1 | 0 | 1 | 0 | 0 | 0 | 0 | 0 | 1 | 4 |
| <u>RBJ</u>       | 1 | 1 | 0 | 1 | 0 | 0 | 0 | 0 | 0 | 1 | 4 |
| <u>C1RL</u>      | 1 | 1 | 0 | 1 | 0 | 0 | 0 | 0 | 0 | 1 | 4 |
| <u>SLC25A37</u>  | 1 | 1 | 0 | 1 | 0 | 0 | 0 | 0 | 0 | 1 | 4 |
| <u>PLAC8</u>     | 1 | 1 | 0 | 1 | 0 | 0 | 0 | 0 | 0 | 1 | 4 |
| <u>PLAC8</u>     | 1 | 1 | 0 | 1 | 0 | 0 | 0 | 0 | 0 | 1 | 4 |
| <u>SPG21</u>     | 1 | 1 | 0 | 1 | 0 | 0 | 0 | 0 | 0 | 1 | 4 |
| <u>CRNKL1</u>    | 1 | 1 | 0 | 1 | 0 | 0 | 0 | 0 | 0 | 1 | 4 |
| <u>KLRF1</u>     | 1 | 1 | 0 | 1 | 0 | 0 | 0 | 0 | 0 | 1 | 4 |
| <u>HOOK1</u>     | 1 | 1 | 0 | 1 | 0 | 0 | 0 | 0 | 0 | 1 | 4 |
| <u>CDC40</u>     | 1 | 1 | 0 | 1 | 0 | 0 | 0 | 0 | 0 | 1 | 4 |
| <u>CRLF3</u>     | 1 | 1 | 0 | 1 | 0 | 0 | 0 | 0 | 0 | 1 | 4 |
| <u>WNT16</u>     | 1 | 1 | 0 | 1 | 0 | 0 | 0 | 0 | 0 | 1 | 4 |
| <u>PDE3B</u>     | 1 | 1 | 0 | 1 | 0 | 0 | 0 | 0 | 0 | 1 | 4 |
| <u>PRKAG2</u>    | 1 | 1 | 0 | 1 | 0 | 0 | 0 | 0 | 0 | 1 | 4 |
| <u>PCYOX1</u>    | 1 | 1 | 0 | 1 | 0 | 0 | 0 | 0 | 0 | 1 | 4 |
| <u>ANKFY1</u>    | 1 | 1 | 0 | 1 | 0 | 0 | 0 | 0 | 0 | 1 | 4 |
| <u>C22orf28</u>  | 1 | 1 | 0 | 1 | 0 | 0 | 0 | 0 | 0 | 1 | 4 |
| <u>GTSE1</u>     | 1 | 1 | 0 | 1 | 0 | 0 | 0 | 0 | 0 | 1 | 4 |
| <u>C14orf129</u> | 1 | 1 | 0 | 1 | 0 | 0 | 0 | 0 | 0 | 1 | 4 |
| <u>PCF11</u>     | 1 | 1 | 0 | 1 | 1 | 0 | 0 | 0 | 0 | 0 | 4 |
| <u>TRIM33</u>    | 1 | 1 | 0 | 1 | 0 | 0 | 0 | 0 | 0 | 1 | 4 |
| <u>PDK1</u>      | 1 | 1 | 0 | 1 | 0 | 0 | 0 | 0 | 0 | 1 | 4 |
| <u>MRPS23</u>    | 1 | 1 | 0 | 1 | 0 | 0 | 0 | 0 | 0 | 1 | 4 |
| <u>ZFR</u>       | 1 | 1 | 0 | 1 | 0 | 0 | 0 | 0 | 0 | 1 | 4 |
| <u>ASB1</u>      | 1 | 1 | 0 | 1 | 0 | 0 | 0 | 0 | 0 | 1 | 4 |
| <u>ENPP1</u>     | 1 | 1 | 0 | 1 | 0 | 0 | 0 | 0 | 0 | 1 | 4 |
| <u>SUFU</u>      | 1 | 1 | 0 | 1 | 0 | 0 | 0 | 0 | 0 | 1 | 4 |
| <u>PDPK1</u>     | 1 | 1 | 0 | 1 | 0 | 0 | 0 | 0 | 0 | 1 | 4 |
| <u>SELT</u>      | 1 | 1 | 0 | 1 | 0 | 0 | 0 | 0 | 0 | 1 | 4 |
| <u>SLC26A4</u>   | 1 | 1 | 0 | 1 | 0 | 0 | 0 | 0 | 0 | 1 | 4 |
| <u>CMPK1</u>     | 1 | 1 | 0 | 1 | 0 | 0 | 0 | 0 | 0 | 1 | 4 |
| <u>POLR3K</u>    | 1 | 1 | 0 | 1 | 0 | 0 | 0 | 0 | 0 | 1 | 4 |
| <u>UPB1</u>      | 1 | 1 | 0 | 1 | 0 | 0 | 0 | 0 | 0 | 1 | 4 |
| <u>RAB8B</u>     | 1 | 1 | 0 | 1 | 0 | 0 | 0 | 0 | 0 | 1 | 4 |
| <u>ZAK</u>       | 1 | 1 | 0 | 1 | 0 | 0 | 0 | 0 | 0 | 1 | 4 |
| <u>SIX4</u>      | 1 | 1 | 0 | 1 | 0 | 0 | 0 | 0 | 0 | 1 | 4 |

|                 |   |   |   |   |   |   |   |   |   |   |   |
|-----------------|---|---|---|---|---|---|---|---|---|---|---|
| <u>PEX13</u>    | 1 | 1 | 0 | 1 | 0 | 0 | 0 | 0 | 0 | 1 | 4 |
| <u>PF4V1</u>    | 1 | 1 | 0 | 1 | 0 | 0 | 0 | 0 | 0 | 1 | 4 |
| <u>PFAS</u>     | 1 | 1 | 0 | 1 | 0 | 0 | 0 | 0 | 0 | 1 | 4 |
| <u>ATP8B1</u>   | 1 | 1 | 0 | 1 | 0 | 0 | 0 | 0 | 0 | 1 | 4 |
| <u>PFTK1</u>    | 1 | 1 | 0 | 1 | 1 | 0 | 0 | 0 | 0 | 0 | 4 |
| <u>ATP6V1A</u>  | 1 | 1 | 0 | 1 | 0 | 0 | 0 | 0 | 0 | 1 | 4 |
| <u>PGR</u>      | 1 | 1 | 0 | 1 | 0 | 0 | 0 | 0 | 0 | 1 | 4 |
| <u>SERPINB9</u> | 1 | 1 | 0 | 1 | 0 | 0 | 0 | 0 | 0 | 1 | 4 |
| <u>PIN4</u>     | 1 | 1 | 0 | 1 | 0 | 0 | 0 | 0 | 0 | 1 | 4 |
| <u>PKD2</u>     | 1 | 1 | 0 | 1 | 0 | 0 | 0 | 0 | 0 | 1 | 4 |
| <u>PKP2</u>     | 1 | 1 | 0 | 1 | 0 | 0 | 0 | 0 | 0 | 1 | 4 |
| <u>PLA2G4A</u>  | 1 | 1 | 0 | 1 | 0 | 0 | 0 | 0 | 0 | 1 | 4 |
| <u>PLAG1</u>    | 1 | 1 | 0 | 1 | 0 | 0 | 0 | 0 | 0 | 1 | 4 |
| <u>PLAU</u>     | 1 | 1 | 0 | 1 | 0 | 0 | 0 | 0 | 0 | 1 | 4 |
| <u>BCL11A</u>   | 1 | 1 | 0 | 1 | 0 | 0 | 0 | 0 | 0 | 1 | 4 |
| <u>CHIC1</u>    | 1 | 1 | 0 | 1 | 0 | 0 | 0 | 0 | 0 | 1 | 4 |
| <u>PANK1</u>    | 1 | 1 | 0 | 1 | 0 | 0 | 0 | 0 | 0 | 1 | 4 |
| <u>PLD1</u>     | 1 | 1 | 0 | 1 | 0 | 0 | 0 | 0 | 0 | 1 | 4 |
| <u>PLEK</u>     | 1 | 1 | 0 | 1 | 0 | 0 | 0 | 0 | 0 | 1 | 4 |
| <u>PLP1</u>     | 1 | 1 | 0 | 1 | 1 | 0 | 0 | 0 | 0 | 0 | 4 |
| <u>PMAIP1</u>   | 1 | 1 | 0 | 1 | 0 | 0 | 0 | 0 | 0 | 1 | 4 |
| <u>PML</u>      | 1 | 1 | 0 | 1 | 0 | 0 | 0 | 0 | 0 | 1 | 4 |
| <u>ATP7B</u>    | 1 | 1 | 0 | 1 | 0 | 0 | 0 | 0 | 0 | 1 | 4 |
| <u>BRWD1</u>    | 1 | 1 | 0 | 1 | 0 | 0 | 0 | 0 | 0 | 1 | 4 |
| <u>BRWD1</u>    | 1 | 1 | 0 | 1 | 0 | 0 | 0 | 0 | 0 | 1 | 4 |
| <u>BRWD1</u>    | 1 | 1 | 0 | 1 | 0 | 0 | 0 | 0 | 0 | 1 | 4 |
| <u>FAM3B</u>    | 1 | 1 | 0 | 1 | 0 | 0 | 0 | 0 | 0 | 1 | 4 |
| <u>GPR88</u>    | 1 | 1 | 0 | 1 | 0 | 0 | 0 | 0 | 0 | 1 | 4 |
| <u>UBL3</u>     | 1 | 1 | 0 | 1 | 0 | 0 | 0 | 0 | 0 | 1 | 4 |
| <u>PODXL</u>    | 1 | 1 | 0 | 1 | 0 | 0 | 0 | 0 | 0 | 1 | 4 |
| <u>KCNK10</u>   | 1 | 0 | 0 | 1 | 1 | 0 | 0 | 0 | 0 | 1 | 4 |
| <u>KCNK10</u>   | 1 | 0 | 0 | 1 | 1 | 0 | 0 | 0 | 0 | 1 | 4 |
| <u>POLA1</u>    | 1 | 1 | 0 | 1 | 0 | 0 | 0 | 0 | 0 | 1 | 4 |
| <u>GNG2</u>     | 1 | 1 | 0 | 1 | 0 | 0 | 0 | 0 | 0 | 1 | 4 |
| <u>GDAP1</u>    | 1 | 1 | 0 | 1 | 0 | 0 | 0 | 0 | 0 | 1 | 4 |
| <u>HAO1</u>     | 1 | 1 | 0 | 1 | 0 | 0 | 0 | 0 | 0 | 1 | 4 |
| <u>POLR2K</u>   | 1 | 1 | 0 | 1 | 0 | 0 | 0 | 0 | 0 | 1 | 4 |
| <u>SIAE</u>     | 1 | 1 | 0 | 1 | 0 | 0 | 0 | 0 | 0 | 1 | 4 |
| <u>POMC</u>     | 1 | 1 | 0 | 1 | 0 | 0 | 0 | 0 | 0 | 1 | 4 |
| <u>RIN2</u>     | 1 | 1 | 0 | 1 | 0 | 0 | 0 | 0 | 0 | 1 | 4 |
| <u>XRN1</u>     | 1 | 1 | 0 | 1 | 0 | 0 | 0 | 0 | 0 | 1 | 4 |



|                 |   |   |   |   |   |   |   |   |   |   |   |
|-----------------|---|---|---|---|---|---|---|---|---|---|---|
| <u>SMCR7L</u>   | 1 | 1 | 0 | 1 | 0 | 0 | 0 | 0 | 0 | 1 | 4 |
| <u>NLE1</u>     | 1 | 1 | 0 | 1 | 0 | 0 | 0 | 0 | 0 | 1 | 4 |
| <u>TXNDC10</u>  | 1 | 1 | 0 | 1 | 0 | 0 | 0 | 0 | 0 | 1 | 4 |
| <u>RBM47</u>    | 1 | 1 | 0 | 1 | 0 | 0 | 0 | 0 | 0 | 1 | 4 |
| <u>DHX29</u>    | 1 | 1 | 0 | 1 | 0 | 0 | 0 | 0 | 0 | 1 | 4 |
| <u>POU3F2</u>   | 1 | 1 | 0 | 1 | 0 | 0 | 0 | 0 | 0 | 1 | 4 |
| <u>MTMR12</u>   | 1 | 1 | 0 | 1 | 0 | 0 | 0 | 0 | 0 | 1 | 4 |
| <u>CCNJ</u>     | 1 | 1 | 0 | 1 | 0 | 0 | 0 | 0 | 0 | 1 | 4 |
| <u>KIAA1383</u> | 1 | 1 | 0 | 1 | 0 | 0 | 0 | 0 | 0 | 1 | 4 |
| <u>PPARA</u>    | 1 | 1 | 0 | 1 | 0 | 0 | 0 | 0 | 0 | 1 | 4 |
| <u>TBC1D13</u>  | 1 | 1 | 0 | 1 | 0 | 0 | 0 | 0 | 0 | 1 | 4 |
| <u>TMEM106B</u> | 1 | 1 | 0 | 1 | 0 | 0 | 0 | 0 | 0 | 1 | 4 |
| <u>MARCH5</u>   | 1 | 1 | 0 | 1 | 0 | 0 | 0 | 0 | 0 | 1 | 4 |
| <u>OTUD4</u>    | 1 | 1 | 0 | 1 | 0 | 0 | 0 | 0 | 0 | 1 | 4 |
| <u>EPDR1</u>    | 1 | 1 | 0 | 1 | 0 | 0 | 0 | 0 | 0 | 1 | 4 |
| <u>ZRANB1</u>   | 1 | 1 | 0 | 1 | 0 | 0 | 0 | 0 | 0 | 1 | 4 |
| <u>TET2</u>     | 1 | 1 | 0 | 1 | 0 | 0 | 0 | 0 | 0 | 1 | 4 |
| <u>BNC2</u>     | 1 | 1 | 0 | 1 | 0 | 0 | 0 | 0 | 0 | 1 | 4 |
| <u>KLHL24</u>   | 1 | 1 | 0 | 1 | 0 | 0 | 0 | 0 | 0 | 1 | 4 |
| <u>CNNM2</u>    | 1 | 1 | 0 | 1 | 0 | 0 | 0 | 0 | 0 | 1 | 4 |
| <u>ZNF586</u>   | 1 | 1 | 0 | 1 | 0 | 0 | 0 | 0 | 0 | 1 | 4 |
| <u>AFTPH</u>    | 0 | 0 | 0 | 1 | 1 | 1 | 0 | 0 | 0 | 1 | 4 |
| <u>ZNF280D</u>  | 1 | 0 | 0 | 1 | 1 | 0 | 0 | 0 | 0 | 1 | 4 |
| <u>BSPRY</u>    | 1 | 1 | 0 | 1 | 0 | 0 | 0 | 0 | 0 | 1 | 4 |
| <u>RBM35A</u>   | 1 | 1 | 0 | 1 | 0 | 0 | 0 | 0 | 0 | 1 | 4 |
| <u>PAQR5</u>    | 1 | 1 | 0 | 1 | 0 | 0 | 0 | 0 | 0 | 1 | 4 |
| <u>FAM46C</u>   | 1 | 1 | 0 | 1 | 0 | 0 | 0 | 0 | 0 | 1 | 4 |
| <u>PGPEP1</u>   | 1 | 1 | 0 | 1 | 0 | 0 | 0 | 0 | 0 | 1 | 4 |
| <u>C9orf167</u> | 1 | 1 | 0 | 1 | 0 | 0 | 0 | 0 | 0 | 1 | 4 |
| <u>C4orf30</u>  | 1 | 1 | 0 | 1 | 0 | 0 | 0 | 0 | 0 | 1 | 4 |
| <u>ZCCHC2</u>   | 1 | 1 | 0 | 1 | 0 | 0 | 0 | 0 | 0 | 1 | 4 |
| <u>UHRF1BP1</u> | 1 | 1 | 0 | 1 | 0 | 0 | 0 | 0 | 0 | 1 | 4 |
| <u>RNF43</u>    | 1 | 1 | 0 | 1 | 0 | 0 | 0 | 0 | 0 | 1 | 4 |
| <u>ELOVL2</u>   | 1 | 1 | 0 | 1 | 0 | 0 | 0 | 0 | 0 | 1 | 4 |
| <u>CMTM6</u>    | 1 | 1 | 0 | 1 | 0 | 0 | 0 | 0 | 0 | 1 | 4 |
| <u>OCIAD1</u>   | 1 | 1 | 0 | 1 | 0 | 0 | 0 | 0 | 0 | 1 | 4 |
| <u>OCIAD1</u>   | 1 | 1 | 0 | 1 | 0 | 0 | 0 | 0 | 0 | 1 | 4 |
| <u>RNF125</u>   | 1 | 1 | 0 | 1 | 0 | 0 | 0 | 0 | 0 | 1 | 4 |
| <u>PPM1B</u>    | 1 | 1 | 0 | 1 | 0 | 0 | 0 | 0 | 0 | 1 | 4 |
| <u>TRSPAP1</u>  | 1 | 1 | 0 | 1 | 0 | 0 | 0 | 0 | 0 | 1 | 4 |
| <u>C1orf27</u>  | 1 | 1 | 0 | 1 | 0 | 0 | 0 | 0 | 0 | 1 | 4 |

|                  |   |   |   |   |   |   |   |   |   |   |   |
|------------------|---|---|---|---|---|---|---|---|---|---|---|
| <u>FAM120C</u>   | 1 | 1 | 0 | 1 | 0 | 0 | 0 | 0 | 0 | 1 | 4 |
| <u>C1orf109</u>  | 1 | 1 | 0 | 1 | 0 | 0 | 0 | 0 | 0 | 1 | 4 |
| <u>SLC25A38</u>  | 1 | 1 | 0 | 1 | 0 | 0 | 0 | 0 | 0 | 1 | 4 |
| <u>MOSC2</u>     | 1 | 1 | 0 | 1 | 0 | 0 | 0 | 0 | 0 | 1 | 4 |
| <u>TMCO3</u>     | 1 | 1 | 0 | 1 | 0 | 0 | 0 | 0 | 0 | 1 | 4 |
| <u>FLJ20699</u>  | 1 | 1 | 0 | 1 | 0 | 0 | 0 | 0 | 0 | 1 | 4 |
| <u>PHIP</u>      | 1 | 1 | 0 | 1 | 1 | 0 | 0 | 0 | 0 | 0 | 4 |
| <u>BANK1</u>     | 1 | 1 | 0 | 1 | 0 | 0 | 0 | 0 | 0 | 1 | 4 |
| <u>FAM70A</u>    | 1 | 1 | 0 | 1 | 0 | 0 | 0 | 0 | 0 | 1 | 4 |
| <u>HEATR3</u>    | 1 | 1 | 0 | 1 | 0 | 0 | 0 | 0 | 0 | 1 | 4 |
| <u>USP47</u>     | 1 | 1 | 0 | 1 | 0 | 0 | 0 | 0 | 0 | 1 | 4 |
| <u>NOL8</u>      | 1 | 1 | 0 | 1 | 0 | 0 | 0 | 0 | 0 | 1 | 4 |
| <u>PTCD3</u>     | 1 | 1 | 0 | 1 | 0 | 0 | 0 | 0 | 0 | 1 | 4 |
| <u>CDC44</u>     | 1 | 1 | 0 | 1 | 0 | 0 | 0 | 0 | 0 | 1 | 4 |
| <u>CDC44</u>     | 1 | 1 | 0 | 1 | 0 | 0 | 0 | 0 | 0 | 1 | 4 |
| <u>PPP1R2</u>    | 1 | 1 | 0 | 1 | 0 | 0 | 0 | 0 | 0 | 1 | 4 |
| <u>ATG16L1</u>   | 1 | 1 | 0 | 1 | 0 | 0 | 0 | 0 | 0 | 1 | 4 |
| <u>AIM1L</u>     | 1 | 1 | 0 | 1 | 0 | 0 | 0 | 0 | 0 | 1 | 4 |
| <u>PPP1R3C</u>   | 1 | 1 | 0 | 1 | 0 | 0 | 0 | 0 | 0 | 1 | 4 |
| <u>TMEM45A</u>   | 1 | 1 | 0 | 1 | 0 | 0 | 0 | 0 | 0 | 1 | 4 |
| <u>IFT57</u>     | 1 | 1 | 0 | 1 | 0 | 0 | 0 | 0 | 0 | 1 | 4 |
| <u>SOBP</u>      | 1 | 1 | 0 | 1 | 0 | 0 | 0 | 0 | 0 | 1 | 4 |
| <u>C10orf118</u> | 1 | 1 | 0 | 1 | 0 | 0 | 0 | 0 | 0 | 1 | 4 |
| <u>PPP1R3D</u>   | 1 | 1 | 0 | 1 | 0 | 0 | 0 | 0 | 0 | 1 | 4 |
| <u>C8orf32</u>   | 1 | 1 | 0 | 1 | 0 | 0 | 0 | 0 | 0 | 1 | 4 |
| <u>ATG2B</u>     | 1 | 1 | 0 | 1 | 0 | 0 | 0 | 0 | 0 | 1 | 4 |
| <u>AGGF1</u>     | 1 | 1 | 0 | 1 | 0 | 0 | 0 | 0 | 0 | 1 | 4 |
| <u>FIGN</u>      | 1 | 1 | 0 | 1 | 0 | 0 | 0 | 0 | 0 | 1 | 4 |
| <u>THAP1</u>     | 1 | 1 | 0 | 1 | 0 | 0 | 0 | 0 | 0 | 1 | 4 |
| <u>THAP1</u>     | 1 | 1 | 0 | 1 | 0 | 0 | 0 | 0 | 0 | 1 | 4 |
| <u>ARMC1</u>     | 1 | 1 | 0 | 1 | 0 | 0 | 0 | 0 | 0 | 1 | 4 |
| <u>TMEM33</u>    | 1 | 1 | 0 | 1 | 0 | 0 | 0 | 0 | 0 | 1 | 4 |
| <u>SHO1</u>      | 1 | 1 | 0 | 1 | 0 | 0 | 0 | 0 | 0 | 1 | 4 |
| <u>C20orf12</u>  | 1 | 1 | 0 | 1 | 0 | 0 | 0 | 0 | 0 | 1 | 4 |
| <u>PBRM1</u>     | 1 | 1 | 0 | 1 | 0 | 0 | 0 | 0 | 0 | 1 | 4 |
| <u>C12orf35</u>  | 1 | 1 | 0 | 1 | 0 | 0 | 0 | 0 | 0 | 1 | 4 |
| <u>PI5RS</u>     | 1 | 1 | 0 | 1 | 0 | 0 | 0 | 0 | 0 | 1 | 4 |
| <u>APPL2</u>     | 1 | 1 | 0 | 1 | 0 | 0 | 0 | 0 | 0 | 1 | 4 |
| <u>PPP2R3A</u>   | 1 | 1 | 0 | 1 | 0 | 0 | 0 | 0 | 0 | 1 | 4 |
| <u>UBA6</u>      | 1 | 1 | 0 | 1 | 0 | 0 | 0 | 0 | 0 | 1 | 4 |
| <u>CCDC25</u>    | 1 | 1 | 0 | 1 | 0 | 0 | 0 | 0 | 0 | 1 | 4 |

|                 |   |   |   |   |   |   |   |   |   |   |   |
|-----------------|---|---|---|---|---|---|---|---|---|---|---|
| <u>ASXL2</u>    | 1 | 1 | 0 | 1 | 0 | 0 | 0 | 0 | 0 | 1 | 4 |
| <u>TMEM19</u>   | 1 | 1 | 0 | 1 | 0 | 0 | 0 | 0 | 0 | 1 | 4 |
| <u>ZNF654</u>   | 1 | 1 | 0 | 1 | 0 | 0 | 0 | 0 | 0 | 1 | 4 |
| <u>UBE2W</u>    | 1 | 1 | 0 | 1 | 0 | 0 | 0 | 0 | 0 | 1 | 4 |
| <u>TMEM40</u>   | 1 | 1 | 0 | 1 | 0 | 0 | 0 | 0 | 0 | 1 | 4 |
| <u>SPTLC3</u>   | 1 | 1 | 0 | 1 | 0 | 0 | 0 | 0 | 0 | 1 | 4 |
| <u>PEF1</u>     | 1 | 1 | 0 | 1 | 0 | 0 | 0 | 0 | 0 | 1 | 4 |
| <u>RFK</u>      | 1 | 1 | 0 | 1 | 0 | 0 | 0 | 0 | 0 | 1 | 4 |
| <u>TMEM144</u>  | 1 | 1 | 0 | 1 | 0 | 0 | 0 | 0 | 0 | 1 | 4 |
| <u>C2orf29</u>  | 1 | 1 | 0 | 1 | 0 | 0 | 0 | 0 | 0 | 1 | 4 |
| <u>FLJ11184</u> | 1 | 1 | 0 | 1 | 0 | 0 | 0 | 0 | 0 | 1 | 4 |
| <u>AGPAT5</u>   | 1 | 1 | 0 | 1 | 0 | 0 | 0 | 0 | 0 | 1 | 4 |
| <u>C10orf59</u> | 1 | 1 | 0 | 1 | 0 | 0 | 0 | 0 | 0 | 1 | 4 |
| <u>PHCA</u>     | 1 | 1 | 0 | 1 | 0 | 0 | 0 | 0 | 0 | 1 | 4 |
| <u>DRAM</u>     | 1 | 1 | 0 | 1 | 0 | 0 | 0 | 0 | 0 | 1 | 4 |
| <u>WDR33</u>    | 1 | 1 | 0 | 1 | 0 | 0 | 0 | 0 | 0 | 1 | 4 |
| <u>WDR33</u>    | 1 | 1 | 0 | 1 | 0 | 0 | 0 | 0 | 0 | 1 | 4 |
| <u>LAPTM4B</u>  | 1 | 1 | 0 | 1 | 0 | 0 | 0 | 0 | 0 | 1 | 4 |
| <u>SLC22A15</u> | 1 | 1 | 0 | 1 | 0 | 0 | 0 | 0 | 0 | 1 | 4 |
| <u>PI4K2A</u>   | 0 | 1 | 0 | 1 | 1 | 0 | 0 | 0 | 0 | 1 | 4 |
| <u>HEMGN</u>    | 1 | 1 | 0 | 1 | 0 | 0 | 0 | 0 | 0 | 1 | 4 |
| <u>MCM10</u>    | 1 | 1 | 0 | 1 | 0 | 0 | 0 | 0 | 0 | 1 | 4 |
| <u>YOD1</u>     | 1 | 1 | 0 | 1 | 0 | 0 | 0 | 0 | 0 | 1 | 4 |
| <u>TNFRSF19</u> | 1 | 1 | 0 | 1 | 0 | 0 | 0 | 0 | 0 | 1 | 4 |
| <u>ELAC1</u>    | 1 | 1 | 0 | 1 | 0 | 0 | 0 | 0 | 0 | 1 | 4 |
| <u>ZNF823</u>   | 1 | 1 | 0 | 1 | 0 | 0 | 0 | 0 | 0 | 1 | 4 |
| <u>GALNT10</u>  | 1 | 1 | 0 | 1 | 0 | 0 | 0 | 0 | 0 | 1 | 4 |
| <u>C2orf29</u>  | 1 | 1 | 0 | 1 | 0 | 0 | 0 | 0 | 0 | 1 | 4 |
| <u>CHRNA9</u>   | 1 | 1 | 0 | 1 | 0 | 0 | 0 | 0 | 0 | 1 | 4 |
| <u>FERMT1</u>   | 1 | 1 | 0 | 1 | 0 | 0 | 0 | 0 | 0 | 1 | 4 |
| <u>DOCK10</u>   | 1 | 1 | 0 | 1 | 0 | 0 | 0 | 0 | 0 | 1 | 4 |
| <u>THUMPDI</u>  | 1 | 1 | 0 | 1 | 0 | 0 | 0 | 0 | 0 | 1 | 4 |
| <u>ZDHHC7</u>   | 1 | 0 | 0 | 1 | 1 | 0 | 0 | 0 | 0 | 1 | 4 |
| <u>TBC1D22B</u> | 1 | 1 | 0 | 1 | 0 | 0 | 0 | 0 | 0 | 1 | 4 |
| <u>ZNF673</u>   | 1 | 1 | 0 | 1 | 0 | 0 | 0 | 0 | 0 | 1 | 4 |
| <u>ZNF673</u>   | 1 | 1 | 0 | 1 | 0 | 0 | 0 | 0 | 0 | 1 | 4 |
| <u>TMEM127</u>  | 1 | 1 | 0 | 1 | 0 | 0 | 0 | 0 | 0 | 1 | 4 |
| <u>DENND4C</u>  | 1 | 1 | 0 | 1 | 0 | 0 | 0 | 0 | 0 | 1 | 4 |
| <u>RUFY2</u>    | 1 | 1 | 0 | 1 | 0 | 0 | 0 | 0 | 0 | 1 | 4 |
| <u>C10orf6</u>  | 1 | 1 | 0 | 1 | 0 | 0 | 0 | 0 | 0 | 1 | 4 |
| <u>ENAH</u>     | 1 | 1 | 0 | 1 | 0 | 0 | 0 | 0 | 0 | 1 | 4 |

|                     |   |   |   |   |   |   |   |   |   |   |   |
|---------------------|---|---|---|---|---|---|---|---|---|---|---|
| <u>CCAR1</u>        | 1 | 1 | 0 | 1 | 0 | 0 | 0 | 0 | 0 | 1 | 4 |
| <u>AGK</u>          | 1 | 1 | 0 | 1 | 0 | 0 | 0 | 0 | 0 | 1 | 4 |
| <u>TMEM34</u>       | 1 | 1 | 0 | 1 | 0 | 0 | 0 | 0 | 0 | 1 | 4 |
| <u>SEPT11</u>       | 1 | 1 | 0 | 1 | 0 | 0 | 0 | 0 | 0 | 1 | 4 |
| <u>TMEM30A</u>      | 1 | 1 | 0 | 1 | 0 | 0 | 0 | 0 | 0 | 1 | 4 |
| <u>ZNF701</u>       | 1 | 1 | 0 | 1 | 0 | 0 | 0 | 0 | 0 | 1 | 4 |
| <u>H2AFJ</u>        | 1 | 1 | 0 | 1 | 0 | 0 | 0 | 0 | 0 | 1 | 4 |
| <u>ZNF83</u>        | 1 | 1 | 0 | 1 | 0 | 0 | 0 | 0 | 0 | 1 | 4 |
| <u>EXOC2</u>        | 1 | 1 | 0 | 1 | 0 | 0 | 0 | 0 | 0 | 1 | 4 |
| <u>PRKCA</u>        | 1 | 1 | 0 | 1 | 0 | 0 | 0 | 0 | 0 | 1 | 4 |
| <u>FLJ11171</u>     | 1 | 1 | 0 | 1 | 0 | 0 | 0 | 0 | 0 | 1 | 4 |
| <u>CSGALNACT1</u>   | 1 | 1 | 0 | 1 | 0 | 0 | 0 | 0 | 0 | 1 | 4 |
| <u>PCID2</u>        | 1 | 1 | 0 | 1 | 0 | 0 | 0 | 0 | 0 | 1 | 4 |
| <u>SCN3B</u>        | 1 | 1 | 0 | 1 | 0 | 0 | 0 | 0 | 0 | 1 | 4 |
| <u>DCP1A</u>        | 1 | 1 | 0 | 1 | 0 | 0 | 0 | 0 | 0 | 1 | 4 |
| <u>LRP2BP</u>       | 1 | 1 | 0 | 1 | 0 | 0 | 0 | 0 | 0 | 1 | 4 |
| <u>PAG1</u>         | 1 | 1 | 0 | 1 | 0 | 0 | 0 | 0 | 0 | 1 | 4 |
| <u>TEX2</u>         | 1 | 1 | 0 | 1 | 0 | 0 | 0 | 0 | 0 | 1 | 4 |
| <u>TMEM165</u>      | 1 | 1 | 0 | 1 | 0 | 0 | 0 | 0 | 0 | 1 | 4 |
| <u>ACTR10</u>       | 1 | 1 | 0 | 1 | 0 | 0 | 0 | 0 | 0 | 1 | 4 |
| <u>MLL5</u>         | 1 | 1 | 0 | 1 | 0 | 0 | 0 | 0 | 0 | 1 | 4 |
| <u>LANCL2</u>       | 1 | 1 | 0 | 1 | 0 | 0 | 0 | 0 | 0 | 1 | 4 |
| <u>PRKG1</u>        | 1 | 1 | 0 | 1 | 0 | 0 | 0 | 0 | 0 | 1 | 4 |
| <u>NKRF</u>         | 1 | 1 | 0 | 1 | 0 | 0 | 0 | 0 | 0 | 1 | 4 |
| <u>MAPK1</u>        | 1 | 1 | 0 | 1 | 0 | 0 | 0 | 0 | 0 | 1 | 4 |
| <u>SEPT3</u>        | 1 | 0 | 0 | 1 | 1 | 0 | 0 | 0 | 0 | 1 | 4 |
| <u>PRKX</u>         | 1 | 1 | 0 | 1 | 0 | 0 | 0 | 0 | 0 | 1 | 4 |
| <u>PCDHB6</u>       | 1 | 1 | 0 | 1 | 0 | 0 | 0 | 0 | 0 | 1 | 4 |
| <u>PCDHB3</u>       | 1 | 1 | 0 | 1 | 0 | 0 | 0 | 0 | 0 | 1 | 4 |
| <u>ANKH</u>         | 1 | 1 | 0 | 1 | 0 | 0 | 0 | 0 | 0 | 1 | 4 |
| <u>MOSPD1</u>       | 1 | 1 | 0 | 1 | 0 | 0 | 0 | 0 | 0 | 1 | 4 |
| <u>ZNF253</u>       | 1 | 1 | 0 | 1 | 0 | 0 | 0 | 0 | 0 | 1 | 4 |
| <u>RNF20</u>        | 1 | 1 | 0 | 1 | 0 | 0 | 0 | 0 | 0 | 1 | 4 |
| <u>RP5-1022P6.2</u> | 1 | 1 | 0 | 1 | 0 | 0 | 0 | 0 | 0 | 1 | 4 |
| <u>WDR45L</u>       | 1 | 1 | 0 | 1 | 0 | 0 | 0 | 0 | 0 | 1 | 4 |
| <u>PROX1</u>        | 1 | 1 | 0 | 1 | 0 | 0 | 0 | 0 | 0 | 1 | 4 |
| <u>PRMT8</u>        | 1 | 1 | 0 | 1 | 0 | 0 | 0 | 0 | 0 | 1 | 4 |
| <u>CYP26B1</u>      | 1 | 1 | 0 | 1 | 0 | 0 | 0 | 0 | 0 | 1 | 4 |
| <u>TRIM39</u>       | 1 | 0 | 0 | 1 | 1 | 0 | 0 | 0 | 0 | 1 | 4 |
| <u>MUC13</u>        | 1 | 1 | 0 | 1 | 0 | 0 | 0 | 0 | 0 | 1 | 4 |
| <u>PSG9</u>         | 1 | 1 | 0 | 1 | 0 | 0 | 0 | 0 | 0 | 1 | 4 |

|          |   |   |   |   |   |   |   |   |   |   |   |
|----------|---|---|---|---|---|---|---|---|---|---|---|
| ZC3HAV1  | 1 | 1 | 0 | 1 | 0 | 0 | 0 | 0 | 0 | 1 | 4 |
| AGPAT3   | 1 | 1 | 0 | 1 | 0 | 0 | 0 | 0 | 0 | 1 | 4 |
| AGPAT4   | 1 | 1 | 0 | 1 | 0 | 0 | 0 | 0 | 0 | 1 | 4 |
| SPIRE1   | 1 | 1 | 0 | 1 | 0 | 0 | 0 | 0 | 0 | 1 | 4 |
| SMARCAD1 | 1 | 1 | 0 | 1 | 0 | 0 | 0 | 0 | 0 | 1 | 4 |
| DHX33    | 1 | 1 | 0 | 1 | 0 | 0 | 0 | 0 | 0 | 1 | 4 |
| C11orf75 | 1 | 1 | 0 | 1 | 0 | 0 | 0 | 0 | 0 | 1 | 4 |
| C11orf30 | 1 | 1 | 0 | 1 | 0 | 0 | 0 | 0 | 0 | 1 | 4 |
| PRDM10   | 1 | 1 | 0 | 1 | 1 | 0 | 0 | 0 | 0 | 0 | 4 |
| TULP4    | 1 | 1 | 0 | 1 | 0 | 0 | 0 | 0 | 0 | 1 | 4 |
| CABC1    | 1 | 1 | 0 | 1 | 0 | 0 | 0 | 0 | 0 | 1 | 4 |
| BAAT     | 1 | 1 | 0 | 1 | 0 | 0 | 0 | 0 | 0 | 1 | 4 |
| ACN9     | 1 | 1 | 0 | 1 | 0 | 0 | 0 | 0 | 0 | 1 | 4 |
| PARP11   | 1 | 1 | 0 | 1 | 0 | 0 | 0 | 0 | 0 | 1 | 4 |
| C12orf5  | 1 | 1 | 0 | 1 | 0 | 0 | 0 | 0 | 0 | 1 | 4 |
| GOPC     | 1 | 1 | 0 | 1 | 0 | 0 | 0 | 0 | 0 | 1 | 4 |
| PAK7     | 1 | 1 | 0 | 1 | 0 | 0 | 0 | 0 | 0 | 1 | 4 |
| KIAA1219 | 1 | 1 | 0 | 1 | 0 | 0 | 0 | 0 | 0 | 1 | 4 |
| PHTF2    | 1 | 1 | 0 | 1 | 0 | 0 | 0 | 0 | 0 | 1 | 4 |
| SLC39A10 | 1 | 1 | 0 | 1 | 0 | 0 | 0 | 0 | 0 | 1 | 4 |
| ANKRD50  | 1 | 1 | 0 | 1 | 0 | 0 | 0 | 0 | 0 | 1 | 4 |
| GPR126   | 1 | 1 | 0 | 1 | 0 | 0 | 0 | 0 | 0 | 1 | 4 |
| KIAA1199 | 1 | 1 | 0 | 1 | 0 | 0 | 0 | 0 | 0 | 1 | 4 |
| PTEN     | 1 | 1 | 0 | 1 | 0 | 0 | 0 | 0 | 0 | 1 | 4 |
| PTGER3   | 1 | 1 | 0 | 1 | 0 | 0 | 0 | 0 | 0 | 1 | 4 |
| SENP7    | 1 | 1 | 0 | 1 | 1 | 0 | 0 | 0 | 0 | 0 | 4 |
| AICDA    | 1 | 1 | 0 | 1 | 0 | 0 | 0 | 0 | 0 | 1 | 4 |
| TMEM27   | 1 | 1 | 0 | 1 | 0 | 0 | 0 | 0 | 0 | 1 | 4 |
| PTGIS    | 1 | 1 | 0 | 1 | 0 | 0 | 0 | 0 | 0 | 1 | 4 |
| C3orf14  | 1 | 1 | 0 | 1 | 0 | 0 | 0 | 0 | 0 | 1 | 4 |
| SLC24A3  | 1 | 1 | 0 | 1 | 0 | 0 | 0 | 0 | 0 | 1 | 4 |
| PTGS2    | 1 | 1 | 0 | 1 | 0 | 0 | 0 | 0 | 0 | 1 | 4 |
| NDRG3    | 1 | 1 | 0 | 1 | 0 | 0 | 0 | 0 | 0 | 1 | 4 |
| NDRG2    | 1 | 1 | 0 | 1 | 0 | 0 | 0 | 0 | 0 | 1 | 4 |
| BIRC6    | 1 | 1 | 0 | 1 | 0 | 0 | 0 | 0 | 0 | 1 | 4 |
| GALNTL1  | 1 | 1 | 0 | 1 | 0 | 0 | 0 | 0 | 0 | 1 | 4 |
| FAM40B   | 1 | 1 | 0 | 1 | 0 | 0 | 0 | 0 | 0 | 1 | 4 |
| ERMN     | 1 | 1 | 0 | 1 | 0 | 0 | 0 | 0 | 0 | 1 | 4 |
| CNOT6    | 1 | 1 | 0 | 1 | 0 | 0 | 0 | 0 | 0 | 1 | 4 |
| KIAA1211 | 1 | 1 | 0 | 1 | 0 | 0 | 0 | 0 | 0 | 1 | 4 |
| NLN      | 1 | 1 | 0 | 1 | 0 | 0 | 0 | 0 | 0 | 1 | 4 |

|                 |   |   |   |   |   |   |   |   |   |   |   |
|-----------------|---|---|---|---|---|---|---|---|---|---|---|
| <u>MTUS1</u>    | 1 | 1 | 0 | 1 | 0 | 0 | 0 | 0 | 0 | 1 | 4 |
| <u>COG6</u>     | 1 | 1 | 0 | 1 | 0 | 0 | 0 | 0 | 0 | 1 | 4 |
| <u>HECW2</u>    | 1 | 1 | 0 | 1 | 0 | 0 | 0 | 0 | 0 | 1 | 4 |
| <u>CASKIN1</u>  | 1 | 1 | 0 | 1 | 0 | 0 | 0 | 0 | 0 | 1 | 4 |
| <u>PCDH19</u>   | 1 | 1 | 0 | 1 | 0 | 0 | 0 | 0 | 0 | 1 | 4 |
| <u>CGN</u>      | 1 | 1 | 0 | 1 | 0 | 0 | 0 | 0 | 0 | 1 | 4 |
| <u>TBC1D14</u>  | 1 | 1 | 0 | 1 | 0 | 0 | 0 | 0 | 0 | 1 | 4 |
| <u>ZNF398</u>   | 1 | 1 | 0 | 1 | 0 | 0 | 0 | 0 | 0 | 1 | 4 |
| <u>KLHDC5</u>   | 1 | 1 | 0 | 1 | 0 | 0 | 0 | 0 | 0 | 1 | 4 |
| <u>IFT80</u>    | 1 | 1 | 0 | 1 | 0 | 0 | 0 | 0 | 0 | 1 | 4 |
| <u>ARHGAP20</u> | 1 | 1 | 0 | 1 | 0 | 0 | 0 | 0 | 0 | 1 | 4 |
| <u>TRMT5</u>    | 1 | 1 | 0 | 1 | 0 | 0 | 0 | 0 | 0 | 1 | 4 |
| <u>KIAA1407</u> | 1 | 1 | 0 | 1 | 0 | 0 | 0 | 0 | 0 | 1 | 4 |
| <u>TMEM181</u>  | 1 | 1 | 0 | 1 | 0 | 0 | 0 | 0 | 0 | 1 | 4 |
| <u>WDFY1</u>    | 1 | 1 | 0 | 1 | 0 | 0 | 0 | 0 | 0 | 1 | 4 |
| <u>SLAIN2</u>   | 1 | 1 | 0 | 1 | 0 | 0 | 0 | 0 | 0 | 1 | 4 |
| <u>DIP2B</u>    | 1 | 1 | 0 | 1 | 0 | 0 | 0 | 0 | 0 | 1 | 4 |
| <u>KIAA1467</u> | 1 | 1 | 0 | 1 | 0 | 0 | 0 | 0 | 0 | 1 | 4 |
| <u>SHROOM3</u>  | 1 | 1 | 0 | 1 | 0 | 0 | 0 | 0 | 0 | 1 | 4 |
| <u>ZBTB2</u>    | 1 | 1 | 0 | 1 | 0 | 0 | 0 | 0 | 0 | 1 | 4 |
| <u>ZFAT</u>     | 1 | 1 | 0 | 1 | 0 | 0 | 0 | 0 | 0 | 1 | 4 |
| <u>KIAA1486</u> | 1 | 1 | 0 | 1 | 0 | 0 | 0 | 0 | 0 | 1 | 4 |
| <u>DPP10</u>    | 1 | 0 | 0 | 1 | 1 | 0 | 0 | 0 | 0 | 1 | 4 |
| <u>KIAA1553</u> | 1 | 1 | 0 | 1 | 0 | 0 | 0 | 0 | 0 | 1 | 4 |
| <u>ZFP14</u>    | 1 | 1 | 0 | 1 | 0 | 0 | 0 | 0 | 0 | 1 | 4 |
| <u>GPAM</u>     | 1 | 1 | 0 | 1 | 0 | 0 | 0 | 0 | 0 | 1 | 4 |
| <u>ALS2</u>     | 1 | 1 | 0 | 1 | 1 | 0 | 0 | 0 | 0 | 0 | 4 |
| <u>KIAA1576</u> | 1 | 1 | 0 | 1 | 0 | 0 | 0 | 0 | 0 | 1 | 4 |
| <u>USP37</u>    | 1 | 1 | 0 | 1 | 0 | 0 | 0 | 0 | 0 | 1 | 4 |
| <u>DDX55</u>    | 1 | 1 | 0 | 1 | 0 | 0 | 0 | 0 | 0 | 1 | 4 |
| <u>FANCM</u>    | 1 | 1 | 0 | 1 | 0 | 0 | 0 | 0 | 0 | 1 | 4 |
| <u>DENND1A</u>  | 1 | 1 | 0 | 1 | 0 | 0 | 0 | 0 | 0 | 1 | 4 |
| <u>KIAA1609</u> | 1 | 1 | 0 | 1 | 0 | 0 | 0 | 0 | 0 | 1 | 4 |
| <u>KIAA1632</u> | 1 | 1 | 0 | 1 | 0 | 0 | 0 | 0 | 0 | 1 | 4 |
| <u>PTPN3</u>    | 1 | 1 | 0 | 1 | 0 | 0 | 0 | 0 | 0 | 1 | 4 |
| <u>RBAK</u>     | 1 | 1 | 0 | 1 | 0 | 0 | 0 | 0 | 0 | 1 | 4 |
| <u>SLAMF7</u>   | 1 | 1 | 0 | 1 | 0 | 0 | 0 | 0 | 0 | 1 | 4 |
| <u>PTPRB</u>    | 1 | 1 | 0 | 1 | 0 | 0 | 0 | 0 | 0 | 1 | 4 |
| <u>PTPRC</u>    | 1 | 1 | 0 | 1 | 0 | 0 | 0 | 0 | 0 | 1 | 4 |
| <u>NKX3-2</u>   | 1 | 1 | 0 | 1 | 0 | 0 | 0 | 0 | 0 | 1 | 4 |
| <u>PTPRE</u>    | 1 | 1 | 0 | 1 | 0 | 0 | 0 | 0 | 0 | 1 | 4 |

|                 |   |   |   |   |   |   |   |   |   |   |   |
|-----------------|---|---|---|---|---|---|---|---|---|---|---|
| <u>PURB</u>     | 0 | 1 | 0 | 1 | 1 | 0 | 0 | 0 | 0 | 1 | 4 |
| <u>PXMP3</u>    | 1 | 1 | 0 | 1 | 0 | 0 | 0 | 0 | 0 | 1 | 4 |
| <u>FAM108C1</u> | 1 | 1 | 0 | 1 | 0 | 0 | 0 | 0 | 0 | 1 | 4 |
| <u>C2orf77</u>  | 1 | 1 | 0 | 1 | 0 | 0 | 0 | 0 | 0 | 1 | 4 |
| <u>MLL3</u>     | 1 | 1 | 0 | 1 | 0 | 0 | 0 | 0 | 0 | 1 | 4 |
| <u>SELK</u>     | 1 | 1 | 0 | 1 | 0 | 0 | 0 | 0 | 0 | 1 | 4 |
| <u>RBM25</u>    | 1 | 1 | 0 | 1 | 0 | 0 | 0 | 0 | 0 | 1 | 4 |
| <u>DMRT3</u>    | 1 | 1 | 0 | 1 | 0 | 0 | 0 | 0 | 0 | 1 | 4 |
| <u>RAD23B</u>   | 1 | 1 | 0 | 1 | 0 | 0 | 0 | 0 | 0 | 1 | 4 |
| <u>RALA</u>     | 1 | 1 | 0 | 1 | 0 | 0 | 0 | 0 | 0 | 1 | 4 |
| <u>ACTA2</u>    | 1 | 1 | 0 | 1 | 0 | 0 | 0 | 0 | 0 | 1 | 4 |
| <u>RAP2A</u>    | 1 | 1 | 0 | 1 | 0 | 0 | 0 | 0 | 0 | 1 | 4 |
| <u>JARID1A</u>  | 1 | 1 | 0 | 1 | 0 | 0 | 0 | 0 | 0 | 1 | 4 |
| <u>PLEKHA1</u>  | 1 | 1 | 0 | 1 | 0 | 0 | 0 | 0 | 0 | 1 | 4 |
| <u>GNB4</u>     | 1 | 1 | 0 | 1 | 0 | 0 | 0 | 0 | 0 | 1 | 4 |
| <u>BCL2</u>     | 1 | 1 | 0 | 1 | 0 | 0 | 0 | 0 | 0 | 1 | 4 |
| <u>PRPH2</u>    | 1 | 1 | 0 | 1 | 0 | 0 | 0 | 0 | 0 | 1 | 4 |
| <u>RECQL</u>    | 1 | 1 | 0 | 1 | 0 | 0 | 0 | 0 | 0 | 1 | 4 |
| <u>RFC1</u>     | 1 | 1 | 0 | 1 | 0 | 0 | 0 | 0 | 0 | 1 | 4 |
| <u>RFC3</u>     | 1 | 1 | 0 | 1 | 0 | 0 | 0 | 0 | 0 | 1 | 4 |
| <u>RFX2</u>     | 1 | 1 | 0 | 1 | 0 | 0 | 0 | 0 | 0 | 1 | 4 |
| <u>RGS16</u>    | 1 | 1 | 0 | 1 | 0 | 0 | 0 | 0 | 0 | 1 | 4 |
| <u>BCL6</u>     | 0 | 0 | 0 | 1 | 1 | 1 | 0 | 0 | 0 | 1 | 4 |
| <u>RNASEL</u>   | 1 | 1 | 0 | 1 | 0 | 0 | 0 | 0 | 0 | 1 | 4 |
| <u>TGIF2</u>    | 1 | 1 | 0 | 1 | 0 | 0 | 0 | 0 | 0 | 1 | 4 |
| <u>MRPS35</u>   | 1 | 1 | 0 | 1 | 0 | 0 | 0 | 0 | 0 | 1 | 4 |
| <u>RNF6</u>     | 1 | 1 | 0 | 1 | 0 | 0 | 0 | 0 | 0 | 1 | 4 |
| <u>C2orf43</u>  | 1 | 1 | 0 | 1 | 0 | 0 | 0 | 0 | 0 | 1 | 4 |
| <u>SCOC</u>     | 1 | 0 | 0 | 1 | 1 | 0 | 0 | 0 | 0 | 1 | 4 |
| <u>ROBO2</u>    | 1 | 1 | 0 | 1 | 0 | 0 | 0 | 0 | 0 | 1 | 4 |
| <u>HCN2</u>     | 1 | 1 | 0 | 1 | 0 | 0 | 0 | 0 | 0 | 1 | 4 |
| <u>RP2</u>      | 1 | 1 | 0 | 1 | 0 | 0 | 0 | 0 | 0 | 1 | 4 |
| <u>RPE65</u>    | 1 | 1 | 0 | 1 | 0 | 0 | 0 | 0 | 0 | 1 | 4 |
| <u>RPL15</u>    | 1 | 1 | 0 | 1 | 0 | 0 | 0 | 0 | 0 | 1 | 4 |
| <u>RPL28</u>    | 1 | 1 | 0 | 1 | 0 | 0 | 0 | 0 | 0 | 1 | 4 |
| <u>RPN2</u>     | 1 | 1 | 0 | 1 | 0 | 0 | 0 | 0 | 0 | 1 | 4 |
| <u>ZNF704</u>   | 1 | 1 | 0 | 1 | 0 | 0 | 0 | 0 | 0 | 1 | 4 |
| <u>RPS6KA3</u>  | 1 | 1 | 0 | 1 | 0 | 0 | 0 | 0 | 0 | 1 | 4 |
| <u>RPS6KB1</u>  | 1 | 1 | 0 | 1 | 0 | 0 | 0 | 0 | 0 | 1 | 4 |
| <u>CLIP1</u>    | 1 | 0 | 0 | 1 | 1 | 0 | 0 | 0 | 0 | 1 | 4 |
| <u>RYR3</u>     | 1 | 1 | 0 | 1 | 0 | 0 | 0 | 0 | 0 | 1 | 4 |

|                      |   |   |   |   |   |   |   |   |   |   |   |
|----------------------|---|---|---|---|---|---|---|---|---|---|---|
| <u>SALL2</u>         | 1 | 1 | 0 | 1 | 0 | 0 | 0 | 0 | 0 | 1 | 4 |
| <u>SC5DL</u>         | 1 | 1 | 0 | 1 | 0 | 0 | 0 | 0 | 0 | 1 | 4 |
| <u>ATXN1</u>         | 1 | 1 | 0 | 1 | 0 | 0 | 0 | 0 | 0 | 1 | 4 |
| <u>SCD</u>           | 1 | 1 | 0 | 1 | 0 | 0 | 0 | 0 | 0 | 1 | 4 |
| <u>CCL8</u>          | 1 | 1 | 0 | 1 | 0 | 0 | 0 | 0 | 0 | 1 | 4 |
| <u>CCL13</u>         | 1 | 1 | 0 | 1 | 0 | 0 | 0 | 0 | 0 | 1 | 4 |
| <u>CCL22</u>         | 1 | 1 | 0 | 1 | 0 | 0 | 0 | 0 | 0 | 1 | 4 |
| <u>CXCL5</u>         | 1 | 1 | 0 | 1 | 0 | 0 | 0 | 0 | 0 | 1 | 4 |
| <u>SDC2</u>          | 1 | 1 | 0 | 1 | 0 | 0 | 0 | 0 | 0 | 1 | 4 |
| <u>SH2D4A</u>        | 1 | 1 | 0 | 1 | 0 | 0 | 0 | 0 | 0 | 1 | 4 |
| <u>PRDM1</u>         | 1 | 1 | 0 | 1 | 0 | 0 | 0 | 0 | 0 | 1 | 4 |
| <u>NAPB</u>          | 1 | 1 | 0 | 1 | 0 | 0 | 0 | 0 | 0 | 1 | 4 |
| <u>ANKRD5</u>        | 1 | 1 | 0 | 1 | 0 | 0 | 0 | 0 | 0 | 1 | 4 |
| <u>XPNPEP3</u>       | 1 | 1 | 0 | 1 | 0 | 0 | 0 | 0 | 0 | 1 | 4 |
| <u>MRPS14</u>        | 1 | 1 | 0 | 1 | 0 | 0 | 0 | 0 | 0 | 1 | 4 |
| <u>ZNF667</u>        | 1 | 1 | 0 | 1 | 0 | 0 | 0 | 0 | 0 | 1 | 4 |
| <u>PRDM15</u>        | 1 | 1 | 0 | 1 | 0 | 0 | 0 | 0 | 0 | 1 | 4 |
| <u>SELE</u>          | 1 | 1 | 0 | 1 | 0 | 0 | 0 | 0 | 0 | 1 | 4 |
| <u>RBM26</u>         | 1 | 1 | 0 | 1 | 0 | 0 | 0 | 0 | 0 | 1 | 4 |
| <u>CDH23</u>         | 1 | 1 | 0 | 1 | 0 | 0 | 0 | 0 | 0 | 1 | 4 |
| <u>XYLT1</u>         | 1 | 1 | 0 | 1 | 0 | 0 | 0 | 0 | 0 | 1 | 4 |
| <u>ZFYVE20</u>       | 1 | 1 | 0 | 1 | 0 | 0 | 0 | 0 | 0 | 1 | 4 |
| <u>NCAPG</u>         | 1 | 1 | 0 | 1 | 0 | 0 | 0 | 0 | 0 | 1 | 4 |
| <u>MAP2K4</u>        | 1 | 1 | 0 | 1 | 0 | 0 | 0 | 0 | 0 | 1 | 4 |
| <u>NECAB1</u>        | 1 | 1 | 0 | 1 | 0 | 0 | 0 | 0 | 0 | 1 | 4 |
| <u>C14orf4</u>       | 0 | 1 | 0 | 1 | 1 | 0 | 0 | 0 | 0 | 1 | 4 |
| <u>PDLIM2</u>        | 1 | 1 | 0 | 1 | 0 | 0 | 0 | 0 | 0 | 1 | 4 |
| <u>SFRP4</u>         | 1 | 1 | 0 | 1 | 0 | 0 | 0 | 0 | 0 | 1 | 4 |
| <u>SFRS1</u>         | 1 | 1 | 0 | 1 | 0 | 0 | 0 | 0 | 0 | 1 | 4 |
| <u>PAPD5</u>         | 1 | 1 | 0 | 1 | 0 | 0 | 0 | 0 | 0 | 1 | 4 |
| <u>SFRS5</u>         | 1 | 1 | 0 | 1 | 0 | 0 | 0 | 0 | 0 | 1 | 4 |
| <u>DKFZP686E2158</u> | 1 | 1 | 0 | 1 | 0 | 0 | 0 | 0 | 0 | 1 | 4 |
| <u>SOX17</u>         | 1 | 1 | 0 | 1 | 0 | 0 | 0 | 0 | 0 | 1 | 4 |
| <u>HHIP</u>          | 1 | 1 | 0 | 1 | 0 | 0 | 0 | 0 | 0 | 1 | 4 |
| <u>RGS18</u>         | 1 | 1 | 0 | 1 | 0 | 0 | 0 | 0 | 0 | 1 | 4 |
| <u>CENTD3</u>        | 1 | 1 | 0 | 1 | 0 | 0 | 0 | 0 | 0 | 1 | 4 |
| <u>C5orf28</u>       | 1 | 1 | 0 | 1 | 0 | 0 | 0 | 0 | 0 | 1 | 4 |
| <u>TMEM168</u>       | 1 | 1 | 0 | 1 | 0 | 0 | 0 | 0 | 0 | 1 | 4 |
| <u>SUDS3</u>         | 1 | 1 | 0 | 1 | 0 | 0 | 0 | 0 | 0 | 1 | 4 |
| <u>C14orf135</u>     | 1 | 1 | 0 | 1 | 0 | 0 | 0 | 0 | 0 | 1 | 4 |



|                 |   |   |   |   |   |   |   |   |   |   |   |
|-----------------|---|---|---|---|---|---|---|---|---|---|---|
| <u>MRPS25</u>   | 1 | 1 | 0 | 1 | 0 | 0 | 0 | 0 | 0 | 1 | 4 |
| <u>NOM1</u>     | 1 | 1 | 0 | 1 | 0 | 0 | 0 | 0 | 0 | 1 | 4 |
| <u>C15orf56</u> | 1 | 1 | 0 | 1 | 0 | 0 | 0 | 0 | 0 | 1 | 4 |
| <u>ITSN1</u>    | 1 | 1 | 0 | 1 | 0 | 0 | 0 | 0 | 0 | 1 | 4 |
| <u>GIGYF1</u>   | 1 | 1 | 0 | 1 | 0 | 0 | 0 | 0 | 0 | 1 | 4 |
| <u>SHB</u>      | 1 | 1 | 0 | 1 | 0 | 0 | 0 | 0 | 0 | 1 | 4 |
| <u>ACBD3</u>    | 1 | 1 | 0 | 1 | 0 | 0 | 0 | 0 | 0 | 1 | 4 |
| <u>ATPAF1</u>   | 1 | 1 | 0 | 1 | 0 | 0 | 0 | 0 | 0 | 1 | 4 |
| <u>TNS3</u>     | 1 | 1 | 0 | 1 | 0 | 0 | 0 | 0 | 0 | 1 | 4 |
| <u>CREB3L2</u>  | 1 | 1 | 0 | 1 | 0 | 0 | 0 | 0 | 0 | 1 | 4 |
| <u>IPPK</u>     | 1 | 1 | 0 | 1 | 0 | 0 | 0 | 0 | 0 | 1 | 4 |
| <u>RABL5</u>    | 1 | 1 | 0 | 1 | 0 | 0 | 0 | 0 | 0 | 1 | 4 |
| <u>DEPDC6</u>   | 1 | 1 | 0 | 1 | 0 | 0 | 0 | 0 | 0 | 1 | 4 |
| <u>IL25</u>     | 1 | 1 | 0 | 1 | 0 | 0 | 0 | 0 | 0 | 1 | 4 |
| <u>ST3GAL1</u>  | 1 | 1 | 0 | 1 | 0 | 0 | 0 | 0 | 0 | 1 | 4 |
| <u>YTHDC2</u>   | 1 | 1 | 0 | 1 | 0 | 0 | 0 | 0 | 0 | 1 | 4 |
| <u>SLC13A3</u>  | 1 | 1 | 0 | 1 | 0 | 0 | 0 | 0 | 0 | 1 | 4 |
| <u>USP46</u>    | 1 | 1 | 0 | 1 | 0 | 0 | 0 | 0 | 0 | 1 | 4 |
| <u>TTC23</u>    | 1 | 1 | 0 | 1 | 0 | 0 | 0 | 0 | 0 | 1 | 4 |
| <u>SLA</u>      | 1 | 1 | 0 | 1 | 0 | 0 | 0 | 0 | 0 | 1 | 4 |
| <u>REEP1</u>    | 1 | 1 | 0 | 1 | 0 | 0 | 0 | 0 | 0 | 1 | 4 |
| <u>GPBP1</u>    | 1 | 1 | 0 | 1 | 0 | 0 | 0 | 0 | 0 | 1 | 4 |
| <u>SLC1A2</u>   | 1 | 1 | 0 | 1 | 0 | 0 | 0 | 0 | 0 | 1 | 4 |
| <u>ALS2CR4</u>  | 1 | 1 | 0 | 1 | 0 | 0 | 0 | 0 | 0 | 1 | 4 |
| <u>TMEM135</u>  | 1 | 1 | 0 | 1 | 0 | 0 | 0 | 0 | 0 | 1 | 4 |
| <u>SLC3A1</u>   | 1 | 1 | 0 | 1 | 0 | 0 | 0 | 0 | 0 | 1 | 4 |
| <u>ZNF649</u>   | 1 | 1 | 0 | 1 | 0 | 0 | 0 | 0 | 0 | 1 | 4 |
| <u>SLC5A3</u>   | 1 | 1 | 0 | 1 | 0 | 0 | 0 | 0 | 0 | 1 | 4 |
| <u>SLC7A1</u>   | 1 | 1 | 0 | 1 | 0 | 0 | 0 | 0 | 0 | 1 | 4 |
| <u>SLC7A2</u>   | 1 | 1 | 0 | 1 | 0 | 0 | 0 | 0 | 0 | 1 | 4 |
| <u>SLC11A1</u>  | 1 | 1 | 0 | 1 | 0 | 0 | 0 | 0 | 0 | 1 | 4 |
| <u>BMP8B</u>    | 1 | 1 | 0 | 1 | 0 | 0 | 0 | 0 | 0 | 1 | 4 |
| <u>SLC22A3</u>  | 1 | 1 | 0 | 1 | 0 | 0 | 0 | 0 | 0 | 1 | 4 |
| <u>SLC22A2</u>  | 1 | 1 | 0 | 1 | 0 | 0 | 0 | 0 | 0 | 1 | 4 |
| <u>SLN</u>      | 1 | 1 | 0 | 1 | 0 | 0 | 0 | 0 | 0 | 1 | 4 |
| <u>HLTF</u>     | 1 | 1 | 0 | 1 | 0 | 0 | 0 | 0 | 0 | 1 | 4 |
| <u>HLTF</u>     | 1 | 1 | 0 | 1 | 0 | 0 | 0 | 0 | 0 | 1 | 4 |
| <u>PLEKHA3</u>  | 1 | 1 | 0 | 1 | 0 | 0 | 0 | 0 | 0 | 1 | 4 |
| <u>PHACTR4</u>  | 1 | 1 | 0 | 1 | 0 | 0 | 0 | 0 | 0 | 1 | 4 |
| <u>CAPRIN2</u>  | 1 | 1 | 0 | 1 | 0 | 0 | 0 | 0 | 0 | 1 | 4 |
| <u>MTMR9</u>    | 1 | 1 | 0 | 1 | 0 | 0 | 0 | 0 | 0 | 1 | 4 |

|                |   |   |   |   |   |   |   |   |   |   |   |
|----------------|---|---|---|---|---|---|---|---|---|---|---|
| <u>BOLL</u>    | 1 | 1 | 0 | 1 | 0 | 0 | 0 | 0 | 0 | 1 | 4 |
| <u>SUMO3</u>   | 1 | 1 | 0 | 1 | 0 | 0 | 0 | 0 | 0 | 1 | 4 |
| <u>SIGLEC1</u> | 1 | 1 | 0 | 1 | 0 | 0 | 0 | 0 | 0 | 1 | 4 |
| <u>SNAP25</u>  | 1 | 1 | 0 | 1 | 0 | 0 | 0 | 0 | 0 | 1 | 4 |
| <u>SNAPC3</u>  | 1 | 1 | 0 | 1 | 0 | 0 | 0 | 0 | 0 | 1 | 4 |
| <u>SNX1</u>    | 1 | 1 | 0 | 1 | 0 | 0 | 0 | 0 | 0 | 1 | 4 |
| <u>SNTB2</u>   | 1 | 1 | 0 | 1 | 0 | 0 | 0 | 0 | 0 | 1 | 4 |
| <u>SON</u>     | 0 | 1 | 0 | 1 | 1 | 1 | 0 | 0 | 0 | 0 | 4 |
| <u>SOS1</u>    | 1 | 1 | 0 | 1 | 0 | 0 | 0 | 0 | 0 | 1 | 4 |
| <u>SP1</u>     | 1 | 1 | 0 | 1 | 0 | 0 | 0 | 0 | 0 | 1 | 4 |
| <u>SPAG1</u>   | 1 | 1 | 0 | 1 | 0 | 0 | 0 | 0 | 0 | 1 | 4 |
| <u>SPOCK1</u>  | 1 | 1 | 0 | 1 | 0 | 0 | 0 | 0 | 0 | 1 | 4 |
| <u>SPP1</u>    | 1 | 1 | 0 | 1 | 0 | 0 | 0 | 0 | 0 | 1 | 4 |
| <u>SPTBN1</u>  | 1 | 1 | 0 | 1 | 0 | 0 | 0 | 0 | 0 | 1 | 4 |
| <u>SRF</u>     | 1 | 1 | 0 | 1 | 0 | 0 | 0 | 0 | 0 | 1 | 4 |
| <u>SRPK2</u>   | 1 | 1 | 0 | 1 | 0 | 0 | 0 | 0 | 0 | 1 | 4 |
| <u>SSR3</u>    | 1 | 1 | 0 | 1 | 0 | 0 | 0 | 0 | 0 | 1 | 4 |
| <u>STAT3</u>   | 1 | 1 | 0 | 1 | 0 | 0 | 0 | 0 | 0 | 1 | 4 |
| <u>STCH</u>    | 1 | 1 | 0 | 1 | 0 | 0 | 0 | 0 | 0 | 1 | 4 |
| <u>STK4</u>    | 1 | 1 | 0 | 1 | 0 | 0 | 0 | 0 | 0 | 1 | 4 |
| <u>SULT1C2</u> | 1 | 1 | 0 | 1 | 0 | 0 | 0 | 0 | 0 | 1 | 4 |
| <u>KLF9</u>    | 1 | 1 | 0 | 1 | 0 | 0 | 0 | 0 | 0 | 1 | 4 |
| <u>TAF4</u>    | 1 | 1 | 0 | 1 | 0 | 0 | 0 | 0 | 0 | 1 | 4 |
| <u>TAP2</u>    | 1 | 1 | 0 | 1 | 0 | 0 | 0 | 0 | 0 | 1 | 4 |
| <u>TBCD</u>    | 1 | 1 | 0 | 1 | 0 | 0 | 0 | 0 | 0 | 1 | 4 |
| <u>TBL1X</u>   | 1 | 1 | 0 | 1 | 0 | 0 | 0 | 0 | 0 | 1 | 4 |
| <u>HNF1B</u>   | 1 | 1 | 0 | 1 | 0 | 0 | 0 | 0 | 0 | 1 | 4 |
| <u>ACTC1</u>   | 1 | 1 | 0 | 1 | 0 | 0 | 0 | 0 | 0 | 1 | 4 |
| <u>TEAD1</u>   | 1 | 1 | 0 | 1 | 0 | 0 | 0 | 0 | 0 | 1 | 4 |
| <u>TFPI</u>    | 1 | 1 | 0 | 1 | 0 | 0 | 0 | 0 | 0 | 1 | 4 |
| <u>TFRC</u>    | 1 | 1 | 0 | 1 | 0 | 0 | 0 | 0 | 0 | 1 | 4 |
| <u>TGFBR1</u>  | 1 | 1 | 0 | 1 | 0 | 0 | 0 | 0 | 0 | 1 | 4 |
| <u>TGFBR2</u>  | 1 | 1 | 0 | 1 | 0 | 0 | 0 | 0 | 0 | 1 | 4 |
| <u>THRB</u>    | 1 | 1 | 0 | 1 | 0 | 0 | 0 | 0 | 0 | 1 | 4 |
| <u>TIAL1</u>   | 1 | 1 | 0 | 1 | 0 | 0 | 0 | 0 | 0 | 1 | 4 |
| <u>TLOC1</u>   | 1 | 1 | 0 | 1 | 0 | 0 | 0 | 0 | 0 | 1 | 4 |
| <u>TLR4</u>    | 1 | 1 | 0 | 1 | 0 | 0 | 0 | 0 | 0 | 1 | 4 |
| <u>TSPAN8</u>  | 1 | 1 | 0 | 1 | 0 | 0 | 0 | 0 | 0 | 1 | 4 |
| <u>TMEM1</u>   | 1 | 1 | 0 | 1 | 0 | 0 | 0 | 0 | 0 | 1 | 4 |
| <u>TMF1</u>    | 1 | 1 | 0 | 1 | 0 | 0 | 0 | 0 | 0 | 1 | 4 |
| <u>TNFAIP1</u> | 1 | 1 | 0 | 1 | 0 | 0 | 0 | 0 | 0 | 1 | 4 |

|           |   |   |   |   |   |   |   |   |   |   |   |
|-----------|---|---|---|---|---|---|---|---|---|---|---|
| TNFAIP6   | 1 | 1 | 0 | 1 | 0 | 0 | 0 | 0 | 0 | 1 | 4 |
| TPD52     | 1 | 1 | 0 | 1 | 0 | 0 | 0 | 0 | 0 | 1 | 4 |
| NR2C2     | 1 | 1 | 0 | 1 | 0 | 0 | 0 | 0 | 0 | 1 | 4 |
| TRAF1     | 1 | 1 | 0 | 1 | 0 | 0 | 0 | 0 | 0 | 1 | 4 |
| TRPC1     | 1 | 1 | 0 | 1 | 0 | 0 | 0 | 0 | 0 | 1 | 4 |
| TRPC6     | 1 | 1 | 0 | 1 | 0 | 0 | 0 | 0 | 0 | 1 | 4 |
| TSG101    | 1 | 1 | 0 | 1 | 0 | 0 | 0 | 0 | 0 | 1 | 4 |
| DNAJC7    | 1 | 1 | 0 | 1 | 0 | 0 | 0 | 0 | 0 | 1 | 4 |
| TUB       | 1 | 1 | 0 | 1 | 0 | 0 | 0 | 0 | 0 | 1 | 4 |
| D2HGDH    | 1 | 1 | 0 | 1 | 0 | 0 | 0 | 0 | 0 | 1 | 4 |
| TNFSF4    | 1 | 1 | 0 | 1 | 0 | 0 | 0 | 0 | 0 | 1 | 4 |
| TXK       | 1 | 1 | 0 | 1 | 0 | 0 | 0 | 0 | 0 | 1 | 4 |
| UBE2A     | 1 | 1 | 0 | 1 | 0 | 0 | 0 | 0 | 0 | 1 | 4 |
| UBE2D1    | 1 | 1 | 0 | 1 | 0 | 0 | 0 | 0 | 0 | 1 | 4 |
| UBP1      | 1 | 1 | 0 | 1 | 0 | 0 | 0 | 0 | 0 | 1 | 4 |
| USH2A     | 1 | 1 | 0 | 1 | 0 | 0 | 0 | 0 | 0 | 1 | 4 |
| UVRAG     | 1 | 1 | 0 | 1 | 0 | 0 | 0 | 0 | 0 | 1 | 4 |
| VBP1      | 1 | 1 | 0 | 1 | 0 | 0 | 0 | 0 | 0 | 1 | 4 |
| VCAM1     | 1 | 1 | 0 | 1 | 0 | 0 | 0 | 0 | 0 | 1 | 4 |
| VDR       | 1 | 1 | 0 | 1 | 0 | 0 | 0 | 0 | 0 | 1 | 4 |
| VIP       | 1 | 1 | 0 | 1 | 0 | 0 | 0 | 0 | 0 | 1 | 4 |
| VIPR2     | 1 | 1 | 0 | 1 | 0 | 0 | 0 | 0 | 0 | 1 | 4 |
| WFS1      | 1 | 1 | 0 | 1 | 0 | 0 | 0 | 0 | 0 | 1 | 4 |
| WHSC1     | 1 | 1 | 0 | 1 | 0 | 0 | 0 | 0 | 0 | 1 | 4 |
| WHSC1     | 1 | 1 | 0 | 1 | 0 | 0 | 0 | 0 | 0 | 1 | 4 |
| WNT11     | 1 | 1 | 0 | 1 | 1 | 0 | 0 | 0 | 0 | 0 | 4 |
| LOC751071 | 1 | 1 | 0 | 1 | 0 | 0 | 0 | 0 | 0 | 1 | 4 |
| YWHAB     | 1 | 1 | 0 | 1 | 0 | 0 | 0 | 0 | 0 | 1 | 4 |
| C18orf1   | 1 | 1 | 0 | 1 | 0 | 0 | 0 | 0 | 0 | 1 | 4 |
| SF1       | 1 | 1 | 0 | 1 | 0 | 0 | 0 | 0 | 0 | 1 | 4 |
| SF1       | 1 | 1 | 0 | 1 | 0 | 0 | 0 | 0 | 0 | 1 | 4 |
| ZFX       | 1 | 1 | 0 | 1 | 0 | 0 | 0 | 0 | 0 | 1 | 4 |
| ZNF14     | 1 | 1 | 0 | 1 | 0 | 0 | 0 | 0 | 0 | 1 | 4 |
| ZNF33B    | 1 | 1 | 0 | 1 | 0 | 0 | 0 | 0 | 0 | 1 | 4 |
| ZKSCAN1   | 1 | 1 | 0 | 1 | 0 | 0 | 0 | 0 | 0 | 1 | 4 |
| CA3       | 1 | 1 | 0 | 1 | 0 | 0 | 0 | 0 | 0 | 1 | 4 |
| ZNF75     | 1 | 1 | 0 | 1 | 0 | 0 | 0 | 0 | 0 | 1 | 4 |
| ZNF84     | 1 | 1 | 0 | 1 | 0 | 0 | 0 | 0 | 0 | 1 | 4 |
| CA8       | 1 | 1 | 0 | 1 | 0 | 0 | 0 | 0 | 0 | 1 | 4 |
| ZNF124    | 1 | 1 | 0 | 1 | 0 | 0 | 0 | 0 | 0 | 1 | 4 |
| ZNF131    | 1 | 1 | 0 | 1 | 0 | 0 | 0 | 0 | 0 | 1 | 4 |

|                  |   |   |   |   |   |   |   |   |   |   |   |
|------------------|---|---|---|---|---|---|---|---|---|---|---|
| <u>ZNF175</u>    | 1 | 1 | 0 | 1 | 0 | 0 | 0 | 0 | 0 | 1 | 4 |
| <u>ZNF207</u>    | 1 | 1 | 0 | 1 | 0 | 0 | 0 | 0 | 0 | 1 | 4 |
| <u>ZNF207</u>    | 1 | 0 | 0 | 1 | 1 | 0 | 0 | 0 | 0 | 1 | 4 |
| <u>ZFAND5</u>    | 1 | 1 | 0 | 1 | 0 | 0 | 0 | 0 | 0 | 1 | 4 |
| <u>ZFAND5</u>    | 1 | 0 | 0 | 1 | 1 | 0 | 0 | 0 | 0 | 1 | 4 |
| <u>ZNF217</u>    | 1 | 1 | 0 | 1 | 0 | 0 | 0 | 0 | 0 | 1 | 4 |
| <u>ZNF229</u>    | 1 | 1 | 0 | 1 | 0 | 0 | 0 | 0 | 0 | 1 | 4 |
| <u>ZNF236</u>    | 1 | 1 | 0 | 1 | 0 | 0 | 0 | 0 | 0 | 1 | 4 |
| <u>LRP8</u>      | 1 | 1 | 0 | 1 | 0 | 0 | 0 | 0 | 0 | 1 | 4 |
| <u>EVI5</u>      | 1 | 1 | 0 | 1 | 0 | 0 | 0 | 0 | 0 | 1 | 4 |
| <u>CACNB2</u>    | 1 | 0 | 0 | 1 | 1 | 0 | 0 | 0 | 0 | 1 | 4 |
| <u>CACNB2</u>    | 1 | 0 | 0 | 1 | 1 | 0 | 0 | 0 | 0 | 1 | 4 |
| <u>CACNB2</u>    | 1 | 0 | 0 | 1 | 1 | 0 | 0 | 0 | 0 | 1 | 4 |
| <u>CACNB2</u>    | 1 | 0 | 0 | 1 | 1 | 0 | 0 | 0 | 0 | 1 | 4 |
| <u>CACNB2</u>    | 1 | 0 | 0 | 1 | 1 | 0 | 0 | 0 | 0 | 1 | 4 |
| <u>GCS1</u>      | 1 | 1 | 0 | 1 | 0 | 0 | 0 | 0 | 0 | 1 | 4 |
| <u>SLMAP</u>     | 1 | 1 | 0 | 1 | 0 | 0 | 0 | 0 | 0 | 1 | 4 |
| <u>OTUB2</u>     | 1 | 1 | 0 | 1 | 0 | 0 | 0 | 0 | 0 | 1 | 4 |
| <u>C7orf24</u>   | 1 | 1 | 0 | 1 | 0 | 0 | 0 | 0 | 0 | 1 | 4 |
| <u>ZNF655</u>    | 1 | 1 | 0 | 1 | 0 | 0 | 0 | 0 | 0 | 1 | 4 |
| <u>SECISBP2</u>  | 1 | 1 | 0 | 1 | 0 | 0 | 0 | 0 | 0 | 1 | 4 |
| <u>REEP5</u>     | 1 | 1 | 0 | 1 | 0 | 0 | 0 | 0 | 0 | 1 | 4 |
| <u>TRPM8</u>     | 1 | 1 | 0 | 1 | 0 | 0 | 0 | 0 | 0 | 1 | 4 |
| <u>C1orf50</u>   | 1 | 1 | 0 | 1 | 0 | 0 | 0 | 0 | 0 | 1 | 4 |
| <u>C19orf42</u>  | 1 | 1 | 0 | 1 | 0 | 0 | 0 | 0 | 0 | 1 | 4 |
| <u>C1orf116</u>  | 1 | 1 | 0 | 1 | 0 | 0 | 0 | 0 | 0 | 1 | 4 |
| <u>JOSD3</u>     | 1 | 1 | 0 | 1 | 0 | 0 | 0 | 0 | 0 | 1 | 4 |
| <u>APOO</u>      | 1 | 1 | 0 | 1 | 0 | 0 | 0 | 0 | 0 | 1 | 4 |
| <u>C20orf121</u> | 1 | 1 | 0 | 1 | 0 | 0 | 0 | 0 | 0 | 1 | 4 |
| <u>ZNF557</u>    | 1 | 1 | 0 | 1 | 0 | 0 | 0 | 0 | 0 | 1 | 4 |
| <u>CALB1</u>     | 1 | 1 | 0 | 1 | 0 | 0 | 0 | 0 | 0 | 1 | 4 |
| <u>RNF128</u>    | 1 | 1 | 0 | 1 | 0 | 0 | 0 | 0 | 0 | 1 | 4 |
| <u>MUL1</u>      | 1 | 1 | 0 | 1 | 0 | 0 | 0 | 0 | 0 | 1 | 4 |
| <u>RIC3</u>      | 1 | 1 | 0 | 1 | 0 | 0 | 0 | 0 | 0 | 1 | 4 |
| <u>ACSS3</u>     | 1 | 1 | 0 | 1 | 0 | 0 | 0 | 0 | 0 | 1 | 4 |
| <u>OGFRL1</u>    | 1 | 1 | 0 | 1 | 0 | 0 | 0 | 0 | 0 | 1 | 4 |
| <u>SH3TC2</u>    | 1 | 1 | 0 | 1 | 0 | 0 | 0 | 0 | 0 | 1 | 4 |
| <u>PANK3</u>     | 1 | 1 | 0 | 1 | 0 | 0 | 0 | 0 | 0 | 1 | 4 |
| <u>NARG2</u>     | 1 | 1 | 0 | 1 | 0 | 0 | 0 | 0 | 0 | 1 | 4 |
| <u>SMC6</u>      | 1 | 1 | 0 | 1 | 0 | 0 | 0 | 0 | 0 | 1 | 4 |
| <u>STEAP4</u>    | 1 | 1 | 0 | 1 | 0 | 0 | 0 | 0 | 0 | 1 | 4 |

|                  |   |   |   |   |   |   |   |   |   |   |   |
|------------------|---|---|---|---|---|---|---|---|---|---|---|
| <u>ZYG11B</u>    | 1 | 1 | 0 | 1 | 0 | 0 | 0 | 0 | 0 | 1 | 4 |
| <u>NOL9</u>      | 1 | 1 | 0 | 1 | 0 | 0 | 0 | 0 | 0 | 1 | 4 |
| <u>CCDC51</u>    | 1 | 1 | 0 | 1 | 0 | 0 | 0 | 0 | 0 | 1 | 4 |
| <u>PPCS</u>      | 1 | 1 | 0 | 1 | 0 | 0 | 0 | 0 | 0 | 1 | 4 |
| <u>NSUN7</u>     | 1 | 1 | 0 | 1 | 0 | 0 | 0 | 0 | 0 | 1 | 4 |
| <u>TTLL7</u>     | 1 | 1 | 0 | 1 | 0 | 0 | 0 | 0 | 0 | 1 | 4 |
| <u>ZNF419</u>    | 1 | 1 | 0 | 1 | 0 | 0 | 0 | 0 | 0 | 1 | 4 |
| <u>ZNF750</u>    | 1 | 1 | 0 | 1 | 0 | 0 | 0 | 0 | 0 | 1 | 4 |
| <u>TXNDC15</u>   | 1 | 1 | 0 | 1 | 0 | 0 | 0 | 0 | 0 | 1 | 4 |
| <u>ALG9</u>      | 1 | 1 | 0 | 1 | 0 | 0 | 0 | 0 | 0 | 1 | 4 |
| <u>ALS2CR8</u>   | 1 | 1 | 0 | 1 | 0 | 0 | 0 | 0 | 0 | 1 | 4 |
| <u>VASH2</u>     | 1 | 1 | 0 | 1 | 0 | 0 | 0 | 0 | 0 | 1 | 4 |
| <u>NPAL2</u>     | 1 | 1 | 0 | 1 | 0 | 0 | 0 | 0 | 0 | 1 | 4 |
| <u>ZMYM1</u>     | 1 | 1 | 0 | 1 | 0 | 0 | 0 | 0 | 0 | 1 | 4 |
| <u>OSER1</u>     | 1 | 1 | 0 | 1 | 0 | 0 | 0 | 0 | 0 | 1 | 4 |
| <u>SGK269</u>    | 1 | 1 | 0 | 1 | 0 | 0 | 0 | 0 | 0 | 1 | 4 |
| <u>PIP4K2C</u>   | 1 | 1 | 0 | 1 | 0 | 0 | 0 | 0 | 0 | 1 | 4 |
| <u>TUBAL3</u>    | 1 | 1 | 0 | 1 | 0 | 0 | 0 | 0 | 0 | 1 | 4 |
| <u>RPAP2</u>     | 1 | 1 | 0 | 1 | 0 | 0 | 0 | 0 | 0 | 1 | 4 |
| <u>THSD4</u>     | 1 | 1 | 0 | 1 | 0 | 0 | 0 | 0 | 0 | 1 | 4 |
| <u>ZNF212</u>    | 1 | 1 | 0 | 1 | 0 | 0 | 0 | 0 | 0 | 1 | 4 |
| <u>MAP9</u>      | 1 | 1 | 0 | 1 | 0 | 0 | 0 | 0 | 0 | 1 | 4 |
| <u>LPCAT1</u>    | 1 | 1 | 0 | 1 | 0 | 0 | 0 | 0 | 0 | 1 | 4 |
| <u>C10orf119</u> | 1 | 1 | 0 | 1 | 0 | 0 | 0 | 0 | 0 | 1 | 4 |
| <u>FLJ14213</u>  | 1 | 1 | 0 | 1 | 0 | 0 | 0 | 0 | 0 | 1 | 4 |
| <u>CALCR</u>     | 1 | 1 | 0 | 1 | 0 | 0 | 0 | 0 | 0 | 1 | 4 |
| <u>TUSC3</u>     | 1 | 1 | 0 | 1 | 0 | 0 | 0 | 0 | 0 | 1 | 4 |
| <u>TUSC3</u>     | 1 | 1 | 0 | 1 | 0 | 0 | 0 | 0 | 0 | 1 | 4 |
| <u>C2orf54</u>   | 1 | 1 | 0 | 1 | 0 | 0 | 0 | 0 | 0 | 1 | 4 |
| <u>UBXD6</u>     | 1 | 1 | 0 | 1 | 0 | 0 | 0 | 0 | 0 | 1 | 4 |
| <u>SLC35E1</u>   | 1 | 1 | 0 | 1 | 0 | 0 | 0 | 0 | 0 | 1 | 4 |
| <u>C6orf134</u>  | 1 | 1 | 0 | 1 | 0 | 0 | 0 | 0 | 0 | 1 | 4 |
| <u>C7orf58</u>   | 1 | 1 | 0 | 1 | 0 | 0 | 0 | 0 | 0 | 1 | 4 |
| <u>DNAJB14</u>   | 1 | 1 | 0 | 1 | 0 | 0 | 0 | 0 | 0 | 1 | 4 |
| <u>NIP30</u>     | 1 | 1 | 0 | 1 | 0 | 0 | 0 | 0 | 0 | 1 | 4 |
| <u>PHC3</u>      | 1 | 1 | 0 | 1 | 0 | 0 | 0 | 0 | 0 | 1 | 4 |
| <u>PANK2</u>     | 1 | 1 | 0 | 1 | 0 | 0 | 0 | 0 | 0 | 1 | 4 |
| <u>TRPM3</u>     | 1 | 1 | 0 | 1 | 0 | 0 | 0 | 0 | 0 | 1 | 4 |
| <u>C2orf37</u>   | 1 | 1 | 0 | 1 | 0 | 0 | 0 | 0 | 0 | 1 | 4 |
| <u>CALM1</u>     | 1 | 1 | 0 | 1 | 0 | 0 | 0 | 0 | 0 | 1 | 4 |
| <u>VCPIP1</u>    | 1 | 1 | 0 | 1 | 0 | 0 | 0 | 0 | 0 | 1 | 4 |

|                   |   |   |   |   |   |   |   |   |   |   |   |
|-------------------|---|---|---|---|---|---|---|---|---|---|---|
| <u>C6orf97</u>    | 1 | 1 | 0 | 1 | 0 | 0 | 0 | 0 | 0 | 1 | 4 |
| <u>NR4A3</u>      | 0 | 0 | 0 | 1 | 1 | 1 | 0 | 0 | 0 | 1 | 4 |
| <u>THOC7</u>      | 1 | 1 | 0 | 1 | 0 | 0 | 0 | 0 | 0 | 1 | 4 |
| <u>PQLC1</u>      | 1 | 1 | 0 | 1 | 0 | 0 | 0 | 0 | 0 | 1 | 4 |
| <u>SPSB1</u>      | 1 | 1 | 0 | 1 | 0 | 0 | 0 | 0 | 0 | 1 | 4 |
| <u>RNF34</u>      | 1 | 0 | 0 | 1 | 1 | 0 | 0 | 0 | 0 | 1 | 4 |
| <u>C13orf23</u>   | 1 | 0 | 0 | 1 | 1 | 0 | 0 | 0 | 0 | 1 | 4 |
| <u>CCDC92</u>     | 1 | 1 | 0 | 1 | 0 | 0 | 0 | 0 | 0 | 1 | 4 |
| <u>COQ10B</u>     | 1 | 1 | 0 | 1 | 0 | 0 | 0 | 0 | 0 | 1 | 4 |
| <u>LHX3</u>       | 1 | 1 | 0 | 1 | 0 | 0 | 0 | 0 | 0 | 1 | 4 |
| <u>WDR26</u>      | 1 | 1 | 0 | 1 | 0 | 0 | 0 | 0 | 0 | 1 | 4 |
| <u>C16orf70</u>   | 1 | 1 | 0 | 1 | 0 | 0 | 0 | 0 | 0 | 1 | 4 |
| <u>CCDC6</u>      | 1 | 1 | 0 | 1 | 0 | 0 | 0 | 0 | 0 | 1 | 4 |
| <u>WDR82</u>      | 1 | 1 | 0 | 1 | 0 | 0 | 0 | 0 | 0 | 1 | 4 |
| <u>COASY</u>      | 1 | 1 | 0 | 1 | 0 | 0 | 0 | 0 | 0 | 1 | 4 |
| <u>SHOC2</u>      | 1 | 1 | 0 | 1 | 0 | 0 | 0 | 0 | 0 | 1 | 4 |
| <u>CSRP3</u>      | 1 | 1 | 0 | 1 | 0 | 0 | 0 | 0 | 0 | 1 | 4 |
| <u>SNIP</u>       | 1 | 1 | 0 | 1 | 0 | 0 | 0 | 0 | 0 | 1 | 4 |
| <u>THSD7B</u>     | 1 | 1 | 0 | 1 | 0 | 0 | 0 | 0 | 0 | 1 | 4 |
| <u>ITIH5</u>      | 1 | 1 | 0 | 1 | 0 | 0 | 0 | 0 | 0 | 1 | 4 |
| <u>ITIH5</u>      | 1 | 1 | 0 | 1 | 0 | 0 | 0 | 0 | 0 | 1 | 4 |
| <u>ZNF436</u>     | 1 | 1 | 0 | 1 | 0 | 0 | 0 | 0 | 0 | 1 | 4 |
| <u>KIAA1715</u>   | 1 | 1 | 0 | 1 | 0 | 0 | 0 | 0 | 0 | 1 | 4 |
| <u>WNT5B</u>      | 1 | 1 | 0 | 1 | 0 | 0 | 0 | 0 | 0 | 1 | 4 |
| <u>ZBP1</u>       | 1 | 1 | 0 | 1 | 0 | 0 | 0 | 0 | 0 | 1 | 4 |
| <u>SLC25A32</u>   | 1 | 1 | 0 | 1 | 0 | 0 | 0 | 0 | 0 | 1 | 4 |
| <u>OR51E2</u>     | 1 | 1 | 0 | 1 | 0 | 0 | 0 | 0 | 0 | 1 | 4 |
| <u>CALU</u>       | 1 | 1 | 0 | 1 | 0 | 0 | 0 | 0 | 0 | 1 | 4 |
| <u>GAN</u>        | 1 | 1 | 0 | 1 | 0 | 0 | 0 | 0 | 0 | 1 | 4 |
| <u>SYNC1</u>      | 1 | 1 | 0 | 1 | 0 | 0 | 0 | 0 | 0 | 1 | 4 |
| <u>FAM117A</u>    | 1 | 1 | 0 | 1 | 1 | 0 | 0 | 0 | 0 | 0 | 4 |
| <u>C1orf21</u>    | 1 | 1 | 0 | 1 | 0 | 0 | 0 | 0 | 0 | 1 | 4 |
| <u>COL21A1</u>    | 1 | 1 | 0 | 1 | 1 | 0 | 0 | 0 | 0 | 0 | 4 |
| <u>SNX27</u>      | 1 | 1 | 0 | 1 | 0 | 0 | 0 | 0 | 0 | 1 | 4 |
| <u>COIL</u>       | 1 | 1 | 0 | 1 | 0 | 0 | 0 | 0 | 0 | 1 | 4 |
| <u>CAMK2D</u>     | 1 | 1 | 0 | 1 | 0 | 0 | 0 | 0 | 0 | 1 | 4 |
| <u>CAMK2D</u>     | 1 | 1 | 0 | 1 | 0 | 0 | 0 | 0 | 0 | 1 | 4 |
| <u>CAMK2G</u>     | 0 | 0 | 0 | 1 | 1 | 1 | 0 | 0 | 0 | 1 | 4 |
| <u>VANGL1</u>     | 1 | 1 | 0 | 1 | 0 | 0 | 0 | 0 | 0 | 1 | 4 |
| <u>SPRY4</u>      | 1 | 1 | 0 | 1 | 0 | 0 | 0 | 0 | 0 | 1 | 4 |
| <u>ST6GALNAC5</u> | 1 | 1 | 0 | 1 | 0 | 0 | 0 | 0 | 0 | 1 | 4 |

|                 |   |   |   |   |   |   |   |   |   |   |   |
|-----------------|---|---|---|---|---|---|---|---|---|---|---|
| <u>LASIL</u>    | 1 | 1 | 0 | 1 | 0 | 0 | 0 | 0 | 0 | 1 | 4 |
| <u>NCOA3</u>    | 1 | 1 | 0 | 1 | 0 | 0 | 0 | 0 | 0 | 1 | 4 |
| <u>USP9X</u>    | 1 | 1 | 0 | 1 | 0 | 0 | 0 | 0 | 0 | 1 | 4 |
| <u>SMC1A</u>    | 1 | 1 | 0 | 1 | 0 | 0 | 0 | 0 | 0 | 1 | 4 |
| <u>UBL4A</u>    | 1 | 1 | 0 | 1 | 0 | 0 | 0 | 0 | 0 | 1 | 4 |
| <u>USP9Y</u>    | 1 | 1 | 0 | 1 | 0 | 0 | 0 | 0 | 0 | 1 | 4 |
| <u>TRRAP</u>    | 1 | 1 | 0 | 1 | 0 | 0 | 0 | 0 | 0 | 1 | 4 |
| <u>CAPZA2</u>   | 1 | 1 | 0 | 1 | 0 | 0 | 0 | 0 | 0 | 1 | 4 |
| <u>PICALM</u>   | 1 | 1 | 0 | 1 | 0 | 0 | 0 | 0 | 0 | 1 | 4 |
| <u>PCDH11Y</u>  | 1 | 1 | 0 | 1 | 0 | 0 | 0 | 0 | 0 | 1 | 4 |
| <u>FCRL5</u>    | 1 | 1 | 0 | 1 | 0 | 0 | 0 | 0 | 0 | 1 | 4 |
| <u>RAB33B</u>   | 1 | 1 | 0 | 1 | 0 | 0 | 0 | 0 | 0 | 1 | 4 |
| <u>CASP2</u>    | 1 | 1 | 0 | 1 | 0 | 0 | 0 | 0 | 0 | 1 | 4 |
| <u>CASP2</u>    | 1 | 1 | 0 | 1 | 0 | 0 | 0 | 0 | 0 | 1 | 4 |
| <u>THAP2</u>    | 1 | 1 | 0 | 1 | 0 | 0 | 0 | 0 | 0 | 1 | 4 |
| <u>NUDT12</u>   | 1 | 1 | 0 | 1 | 0 | 0 | 0 | 0 | 0 | 1 | 4 |
| <u>SOX7</u>     | 1 | 1 | 0 | 1 | 0 | 0 | 0 | 0 | 0 | 1 | 4 |
| <u>TMEM47</u>   | 1 | 1 | 0 | 1 | 0 | 0 | 0 | 0 | 0 | 1 | 4 |
| <u>AMMECR1L</u> | 1 | 1 | 0 | 1 | 0 | 0 | 0 | 0 | 0 | 1 | 4 |
| <u>C19orf12</u> | 1 | 1 | 0 | 1 | 0 | 0 | 0 | 0 | 0 | 1 | 4 |
| <u>FAM107B</u>  | 1 | 1 | 0 | 1 | 0 | 0 | 0 | 0 | 0 | 1 | 4 |
| <u>C8orf13</u>  | 1 | 1 | 0 | 1 | 0 | 0 | 0 | 0 | 0 | 1 | 4 |
| <u>CRISPLD1</u> | 1 | 1 | 0 | 1 | 0 | 0 | 0 | 0 | 0 | 1 | 4 |
| <u>JAM3</u>     | 1 | 1 | 0 | 1 | 0 | 0 | 0 | 0 | 0 | 1 | 4 |
| <u>ATG10</u>    | 1 | 1 | 0 | 1 | 0 | 0 | 0 | 0 | 0 | 1 | 4 |
| <u>FRMD8</u>    | 1 | 1 | 0 | 1 | 0 | 0 | 0 | 0 | 0 | 1 | 4 |
| <u>SYT15</u>    | 1 | 1 | 0 | 1 | 0 | 0 | 0 | 0 | 0 | 1 | 4 |
| <u>SYT16</u>    | 1 | 1 | 0 | 1 | 0 | 0 | 0 | 0 | 0 | 1 | 4 |
| <u>TMTC1</u>    | 1 | 1 | 0 | 1 | 0 | 0 | 0 | 0 | 0 | 1 | 4 |
| <u>TTLL2</u>    | 1 | 1 | 0 | 1 | 0 | 0 | 0 | 0 | 0 | 1 | 4 |
| <u>KCTD10</u>   | 1 | 1 | 0 | 1 | 0 | 0 | 0 | 0 | 0 | 1 | 4 |
| <u>TMEM133</u>  | 1 | 1 | 0 | 1 | 1 | 0 | 0 | 0 | 0 | 0 | 4 |
| <u>PIP4K2B</u>  | 1 | 1 | 0 | 1 | 0 | 0 | 0 | 0 | 0 | 1 | 4 |
| <u>NCALD</u>    | 1 | 1 | 0 | 1 | 0 | 0 | 0 | 0 | 0 | 1 | 4 |
| <u>NCALD</u>    | 1 | 0 | 0 | 1 | 1 | 0 | 0 | 0 | 0 | 1 | 4 |
| <u>KATNAL1</u>  | 1 | 1 | 0 | 1 | 0 | 0 | 0 | 0 | 0 | 1 | 4 |
| <u>SLC10A7</u>  | 1 | 1 | 0 | 1 | 0 | 0 | 0 | 0 | 0 | 1 | 4 |
| <u>ANKRD27</u>  | 1 | 1 | 0 | 1 | 0 | 0 | 0 | 0 | 0 | 1 | 4 |
| <u>ULK1</u>     | 1 | 1 | 0 | 1 | 0 | 0 | 0 | 0 | 0 | 1 | 4 |
| <u>USP42</u>    | 1 | 1 | 0 | 1 | 0 | 0 | 0 | 0 | 0 | 1 | 4 |
| <u>ZNRF3</u>    | 1 | 1 | 0 | 1 | 0 | 0 | 0 | 0 | 0 | 1 | 4 |

|                  |   |   |   |   |   |   |   |   |   |   |   |
|------------------|---|---|---|---|---|---|---|---|---|---|---|
| <u>SLC7A6OS</u>  | 1 | 1 | 0 | 1 | 0 | 0 | 0 | 0 | 0 | 1 | 4 |
| <u>ZNF644</u>    | 1 | 0 | 0 | 1 | 1 | 1 | 0 | 0 | 0 | 0 | 4 |
| <u>ZNF644</u>    | 1 | 0 | 0 | 1 | 1 | 1 | 0 | 0 | 0 | 0 | 4 |
| <u>ZDHC18</u>    | 1 | 1 | 0 | 1 | 0 | 0 | 0 | 0 | 0 | 1 | 4 |
| <u>MED10</u>     | 1 | 1 | 0 | 1 | 0 | 0 | 0 | 0 | 0 | 1 | 4 |
| <u>CAMKK1</u>    | 1 | 1 | 0 | 1 | 0 | 0 | 0 | 0 | 0 | 1 | 4 |
| <u>SLC37A3</u>   | 1 | 1 | 0 | 1 | 0 | 0 | 0 | 0 | 0 | 1 | 4 |
| <u>SLC37A3</u>   | 1 | 1 | 0 | 1 | 0 | 0 | 0 | 0 | 0 | 1 | 4 |
| <u>HSDL2</u>     | 1 | 1 | 0 | 1 | 0 | 0 | 0 | 0 | 0 | 1 | 4 |
| <u>YIPF4</u>     | 1 | 1 | 0 | 1 | 0 | 0 | 0 | 0 | 0 | 1 | 4 |
| <u>STK24</u>     | 1 | 1 | 0 | 1 | 0 | 0 | 0 | 0 | 0 | 1 | 4 |
| <u>BTBD10</u>    | 1 | 1 | 0 | 1 | 0 | 0 | 0 | 0 | 0 | 1 | 4 |
| <u>MGC13057</u>  | 1 | 1 | 0 | 1 | 0 | 0 | 0 | 0 | 0 | 1 | 4 |
| <u>ING5</u>      | 1 | 1 | 0 | 1 | 0 | 0 | 0 | 0 | 0 | 1 | 4 |
| <u>CASP10</u>    | 1 | 0 | 0 | 1 | 1 | 0 | 0 | 0 | 0 | 1 | 4 |
| <u>PCGF5</u>     | 1 | 1 | 0 | 1 | 0 | 0 | 0 | 0 | 0 | 1 | 4 |
| <u>SOAT2</u>     | 1 | 1 | 0 | 1 | 0 | 0 | 0 | 0 | 0 | 1 | 4 |
| <u>HOOK3</u>     | 1 | 1 | 0 | 1 | 0 | 0 | 0 | 0 | 0 | 1 | 4 |
| <u>NSMAF</u>     | 1 | 0 | 0 | 1 | 1 | 0 | 0 | 0 | 0 | 1 | 4 |
| <u>C15orf48</u>  | 1 | 1 | 0 | 1 | 0 | 0 | 0 | 0 | 0 | 1 | 4 |
| <u>KIAA1826</u>  | 1 | 1 | 0 | 1 | 0 | 0 | 0 | 0 | 0 | 1 | 4 |
| <u>LCOR</u>      | 1 | 1 | 0 | 1 | 0 | 0 | 0 | 0 | 0 | 1 | 4 |
| <u>BTBD12</u>    | 1 | 1 | 0 | 1 | 0 | 0 | 0 | 0 | 0 | 1 | 4 |
| <u>MEGF11</u>    | 1 | 1 | 0 | 1 | 0 | 0 | 0 | 0 | 0 | 1 | 4 |
| <u>MEGF10</u>    | 1 | 1 | 0 | 1 | 0 | 0 | 0 | 0 | 0 | 1 | 4 |
| <u>C14orf142</u> | 1 | 1 | 0 | 1 | 0 | 0 | 0 | 0 | 0 | 1 | 4 |
| <u>KIAA1853</u>  | 1 | 1 | 0 | 1 | 0 | 0 | 0 | 0 | 0 | 1 | 4 |
| <u>ACSS1</u>     | 1 | 1 | 0 | 1 | 0 | 0 | 0 | 0 | 0 | 1 | 4 |
| <u>KBTBD8</u>    | 1 | 1 | 0 | 1 | 0 | 0 | 0 | 0 | 0 | 1 | 4 |
| <u>TMEM185A</u>  | 1 | 1 | 0 | 1 | 0 | 0 | 0 | 0 | 0 | 1 | 4 |
| <u>PAR6G</u>     | 1 | 1 | 0 | 1 | 0 | 0 | 0 | 0 | 0 | 1 | 4 |
| <u>KLF11</u>     | 1 | 1 | 0 | 1 | 0 | 0 | 0 | 0 | 0 | 1 | 4 |
| <u>ZNF594</u>    | 1 | 1 | 0 | 1 | 0 | 0 | 0 | 0 | 0 | 1 | 4 |
| <u>TTBK1</u>     | 1 | 1 | 0 | 1 | 0 | 0 | 0 | 0 | 0 | 1 | 4 |
| <u>CCDC62</u>    | 1 | 1 | 0 | 1 | 0 | 0 | 0 | 0 | 0 | 1 | 4 |
| <u>GTPBP3</u>    | 1 | 1 | 0 | 1 | 0 | 0 | 0 | 0 | 0 | 1 | 4 |
| <u>PSRC1</u>     | 1 | 1 | 0 | 1 | 0 | 0 | 0 | 0 | 0 | 1 | 4 |
| <u>OGT</u>       | 1 | 0 | 0 | 1 | 1 | 0 | 0 | 0 | 0 | 1 | 4 |
| <u>CDC42BPA</u>  | 1 | 0 | 0 | 1 | 1 | 0 | 0 | 0 | 0 | 1 | 4 |
| <u>FCRLA</u>     | 1 | 1 | 0 | 1 | 0 | 0 | 0 | 0 | 0 | 1 | 4 |
| <u>MINA</u>      | 1 | 1 | 0 | 1 | 0 | 0 | 0 | 0 | 0 | 1 | 4 |



|          |   |   |   |   |   |   |   |   |   |   |   |
|----------|---|---|---|---|---|---|---|---|---|---|---|
| ZNF514   | 1 | 1 | 0 | 1 | 0 | 0 | 0 | 0 | 0 | 1 | 4 |
| RPUSD4   | 1 | 1 | 0 | 1 | 0 | 0 | 0 | 0 | 0 | 1 | 4 |
| NFATC2IP | 1 | 1 | 0 | 1 | 0 | 0 | 0 | 0 | 0 | 1 | 4 |
| C9orf100 | 1 | 1 | 0 | 1 | 0 | 0 | 0 | 0 | 0 | 1 | 4 |
| ZNF341   | 1 | 1 | 0 | 1 | 0 | 0 | 0 | 0 | 0 | 1 | 4 |
| ZNF382   | 1 | 1 | 0 | 1 | 0 | 0 | 0 | 0 | 0 | 1 | 4 |
| SLC35B4  | 1 | 1 | 0 | 1 | 0 | 0 | 0 | 0 | 0 | 1 | 4 |
| ZNF587   | 1 | 1 | 0 | 1 | 0 | 0 | 0 | 0 | 0 | 1 | 4 |
| LRP11    | 1 | 1 | 0 | 1 | 0 | 0 | 0 | 0 | 0 | 1 | 4 |
| ALG10    | 1 | 1 | 0 | 1 | 0 | 0 | 0 | 0 | 0 | 1 | 4 |
| FIBCD1   | 1 | 1 | 0 | 1 | 0 | 0 | 0 | 0 | 0 | 1 | 4 |
| RAB2B    | 1 | 1 | 0 | 1 | 0 | 0 | 0 | 0 | 0 | 1 | 4 |
| ABHD13   | 1 | 1 | 0 | 1 | 0 | 0 | 0 | 0 | 0 | 1 | 4 |
| LTV1     | 1 | 1 | 0 | 1 | 0 | 0 | 0 | 0 | 0 | 1 | 4 |
| RANBP3   | 1 | 1 | 0 | 1 | 0 | 0 | 0 | 0 | 0 | 1 | 4 |
| PPFIA1   | 1 | 1 | 0 | 1 | 0 | 0 | 0 | 0 | 0 | 1 | 4 |
| C18orf45 | 1 | 1 | 0 | 1 | 0 | 0 | 0 | 0 | 0 | 1 | 4 |
| GAS7     | 1 | 1 | 0 | 1 | 0 | 0 | 0 | 0 | 0 | 1 | 4 |
| DDO      | 1 | 1 | 0 | 1 | 0 | 0 | 0 | 0 | 0 | 1 | 4 |
| KRTAP4-5 | 1 | 1 | 0 | 1 | 0 | 0 | 0 | 0 | 0 | 1 | 4 |
| CYP4F2   | 1 | 1 | 0 | 1 | 0 | 0 | 0 | 0 | 0 | 1 | 4 |
| CSDA     | 1 | 1 | 0 | 1 | 1 | 0 | 0 | 0 | 0 | 0 | 4 |
| CBX4     | 1 | 1 | 0 | 1 | 0 | 0 | 0 | 0 | 0 | 1 | 4 |
| ALG2     | 1 | 1 | 0 | 1 | 0 | 0 | 0 | 0 | 0 | 1 | 4 |
| EAF1     | 1 | 1 | 0 | 1 | 0 | 0 | 0 | 0 | 0 | 1 | 4 |
| ZIC5     | 1 | 1 | 0 | 1 | 0 | 0 | 0 | 0 | 0 | 1 | 4 |
| DCLK3    | 1 | 1 | 0 | 1 | 0 | 0 | 0 | 0 | 0 | 1 | 4 |
| ZNF518B  | 1 | 1 | 0 | 1 | 0 | 0 | 0 | 0 | 0 | 1 | 4 |
| FHDC1    | 1 | 1 | 0 | 1 | 0 | 0 | 0 | 0 | 0 | 1 | 4 |
| SSH2     | 1 | 1 | 0 | 1 | 0 | 0 | 0 | 0 | 0 | 1 | 4 |
| SELI     | 1 | 1 | 0 | 1 | 0 | 0 | 0 | 0 | 0 | 1 | 4 |
| CDC14B   | 1 | 1 | 0 | 1 | 0 | 0 | 0 | 0 | 0 | 1 | 4 |
| CDC14A   | 1 | 1 | 0 | 1 | 0 | 0 | 0 | 0 | 0 | 1 | 4 |
| PRPF18   | 1 | 1 | 0 | 1 | 0 | 0 | 0 | 0 | 0 | 1 | 4 |
| KMO      | 1 | 1 | 0 | 1 | 0 | 0 | 0 | 0 | 0 | 1 | 4 |
| PDXK     | 1 | 1 | 0 | 1 | 0 | 0 | 0 | 0 | 0 | 1 | 4 |
| MADD     | 1 | 1 | 0 | 1 | 0 | 0 | 0 | 0 | 0 | 1 | 4 |
| GTPBP10  | 1 | 1 | 0 | 1 | 0 | 0 | 0 | 0 | 0 | 1 | 4 |
| ACTL6A   | 1 | 0 | 0 | 1 | 1 | 0 | 0 | 0 | 0 | 1 | 4 |
| ACTL6A   | 1 | 0 | 0 | 1 | 1 | 0 | 0 | 0 | 0 | 1 | 4 |
| SLC25A12 | 1 | 1 | 0 | 1 | 0 | 0 | 0 | 0 | 0 | 1 | 4 |

|                  |   |   |   |   |   |   |   |   |   |   |   |
|------------------|---|---|---|---|---|---|---|---|---|---|---|
| <u>PLA2G4C</u>   | 1 | 1 | 0 | 1 | 0 | 0 | 0 | 0 | 0 | 1 | 4 |
| <u>USO1</u>      | 1 | 1 | 0 | 1 | 0 | 0 | 0 | 0 | 0 | 1 | 4 |
| <u>TP63</u>      | 1 | 1 | 0 | 1 | 0 | 0 | 0 | 0 | 0 | 1 | 4 |
| <u>TP63</u>      | 1 | 1 | 0 | 1 | 0 | 0 | 0 | 0 | 0 | 1 | 4 |
| <u>CBFA2T3</u>   | 1 | 0 | 0 | 1 | 1 | 0 | 0 | 0 | 0 | 1 | 4 |
| <u>KCNK5</u>     | 1 | 1 | 0 | 1 | 0 | 0 | 0 | 0 | 0 | 1 | 4 |
| <u>DDX3Y</u>     | 1 | 1 | 0 | 1 | 0 | 0 | 0 | 0 | 0 | 1 | 4 |
| <u>PDE5A</u>     | 1 | 1 | 0 | 1 | 0 | 0 | 0 | 0 | 0 | 1 | 4 |
| <u>TNKS</u>      | 1 | 1 | 0 | 1 | 0 | 0 | 0 | 0 | 0 | 1 | 4 |
| <u>CBL</u>       | 1 | 1 | 0 | 1 | 0 | 0 | 0 | 0 | 0 | 1 | 4 |
| <u>SLC4A4</u>    | 1 | 1 | 0 | 1 | 0 | 0 | 0 | 0 | 0 | 1 | 4 |
| <u>STX11</u>     | 1 | 1 | 0 | 1 | 0 | 0 | 0 | 0 | 0 | 1 | 4 |
| <u>B3GALT1</u>   | 1 | 1 | 0 | 1 | 0 | 0 | 0 | 0 | 0 | 1 | 4 |
| <u>NOL4</u>      | 1 | 1 | 0 | 1 | 0 | 0 | 0 | 0 | 0 | 1 | 4 |
| <u>PNPT1</u>     | 1 | 1 | 0 | 1 | 0 | 0 | 0 | 0 | 0 | 1 | 4 |
| <u>SNX4</u>      | 1 | 1 | 0 | 1 | 0 | 0 | 0 | 0 | 0 | 1 | 4 |
| <u>C19orf2</u>   | 1 | 1 | 0 | 1 | 0 | 0 | 0 | 0 | 0 | 1 | 4 |
| <u>RNMT</u>      | 1 | 1 | 0 | 1 | 0 | 0 | 0 | 0 | 0 | 1 | 4 |
| <u>ADAM9</u>     | 1 | 1 | 0 | 1 | 1 | 0 | 0 | 0 | 0 | 0 | 4 |
| <u>MTMR1</u>     | 1 | 1 | 0 | 1 | 0 | 0 | 0 | 0 | 0 | 1 | 4 |
| <u>TNFRSF10B</u> | 1 | 1 | 0 | 1 | 0 | 0 | 0 | 0 | 0 | 1 | 4 |
| <u>SUCLG2</u>    | 1 | 1 | 0 | 1 | 0 | 0 | 0 | 0 | 0 | 1 | 4 |
| <u>WDR22</u>     | 1 | 1 | 0 | 1 | 0 | 0 | 0 | 0 | 0 | 1 | 4 |
| <u>AKAP4</u>     | 1 | 1 | 0 | 1 | 0 | 0 | 0 | 0 | 0 | 1 | 4 |
| <u>PER3</u>      | 1 | 1 | 0 | 1 | 0 | 0 | 0 | 0 | 0 | 1 | 4 |
| <u>ARHGEF7</u>   | 0 | 0 | 0 | 1 | 1 | 1 | 0 | 0 | 0 | 1 | 4 |
| <u>PRPF4B</u>    | 1 | 1 | 0 | 1 | 0 | 0 | 0 | 0 | 0 | 1 | 4 |
| <u>TIMELESS</u>  | 1 | 1 | 0 | 1 | 0 | 0 | 0 | 0 | 0 | 1 | 4 |
| <u>HERC3</u>     | 1 | 1 | 0 | 1 | 0 | 0 | 0 | 0 | 0 | 1 | 4 |
| <u>BSN</u>       | 1 | 1 | 0 | 1 | 0 | 0 | 0 | 0 | 0 | 1 | 4 |
| <u>MBD4</u>      | 1 | 1 | 0 | 1 | 0 | 0 | 0 | 0 | 0 | 1 | 4 |
| <u>WASF1</u>     | 1 | 1 | 0 | 1 | 0 | 0 | 0 | 0 | 0 | 1 | 4 |
| <u>AP3D1</u>     | 1 | 1 | 0 | 1 | 0 | 0 | 0 | 0 | 0 | 1 | 4 |
| <u>BTRC</u>      | 1 | 1 | 0 | 1 | 0 | 0 | 0 | 0 | 0 | 1 | 4 |
| <u>WASL</u>      | 1 | 1 | 0 | 1 | 0 | 0 | 0 | 0 | 0 | 1 | 4 |
| <u>HPS4</u>      | 1 | 1 | 0 | 1 | 0 | 0 | 0 | 0 | 0 | 1 | 4 |
| <u>NAV1</u>      | 1 | 1 | 0 | 1 | 0 | 0 | 0 | 0 | 0 | 1 | 4 |
| <u>SEC16B</u>    | 1 | 1 | 0 | 1 | 0 | 0 | 0 | 0 | 0 | 1 | 4 |
| <u>STBD1</u>     | 1 | 1 | 0 | 1 | 0 | 0 | 0 | 0 | 0 | 1 | 4 |
| <u>KBTD6</u>     | 1 | 1 | 0 | 1 | 0 | 0 | 0 | 0 | 0 | 1 | 4 |
| <u>CCNF</u>      | 1 | 1 | 0 | 1 | 0 | 0 | 0 | 0 | 0 | 1 | 4 |

|                 |   |   |   |   |   |   |   |   |   |   |   |
|-----------------|---|---|---|---|---|---|---|---|---|---|---|
| <u>LIMD1</u>    | 1 | 1 | 0 | 1 | 0 | 0 | 0 | 0 | 0 | 1 | 4 |
| <u>KALRN</u>    | 1 | 1 | 0 | 1 | 0 | 0 | 0 | 0 | 0 | 1 | 4 |
| <u>KALRN</u>    | 1 | 1 | 0 | 1 | 0 | 0 | 0 | 0 | 0 | 1 | 4 |
| <u>CDKL2</u>    | 1 | 1 | 0 | 1 | 0 | 0 | 0 | 0 | 0 | 1 | 4 |
| <u>CCNG1</u>    | 1 | 1 | 0 | 1 | 0 | 0 | 0 | 0 | 0 | 1 | 4 |
| <u>PHLDB2</u>   | 1 | 1 | 0 | 1 | 0 | 0 | 0 | 0 | 0 | 1 | 4 |
| <u>FRMD7</u>    | 1 | 1 | 0 | 1 | 0 | 0 | 0 | 0 | 0 | 1 | 4 |
| <u>UNC5A</u>    | 1 | 1 | 0 | 1 | 0 | 0 | 0 | 0 | 0 | 1 | 4 |
| <u>RNF8</u>     | 1 | 1 | 0 | 1 | 0 | 0 | 0 | 0 | 0 | 1 | 4 |
| <u>RNF8</u>     | 1 | 1 | 0 | 1 | 0 | 0 | 0 | 0 | 0 | 1 | 4 |
| <u>FAM105B</u>  | 1 | 1 | 0 | 1 | 0 | 0 | 0 | 0 | 0 | 1 | 4 |
| <u>SEMA5A</u>   | 1 | 1 | 0 | 1 | 0 | 0 | 0 | 0 | 0 | 1 | 4 |
| <u>SPAG9</u>    | 1 | 1 | 0 | 1 | 0 | 0 | 0 | 0 | 0 | 1 | 4 |
| <u>MAP7</u>     | 1 | 1 | 0 | 1 | 0 | 0 | 0 | 0 | 0 | 1 | 4 |
| <u>SLC7A6</u>   | 1 | 1 | 0 | 1 | 0 | 0 | 0 | 0 | 0 | 1 | 4 |
| <u>ZNF700</u>   | 1 | 1 | 0 | 1 | 0 | 0 | 0 | 0 | 0 | 1 | 4 |
| <u>ZNF439</u>   | 1 | 1 | 0 | 1 | 0 | 0 | 0 | 0 | 0 | 1 | 4 |
| <u>LYRM7</u>    | 1 | 1 | 0 | 1 | 0 | 0 | 0 | 0 | 0 | 1 | 4 |
| <u>SYT7</u>     | 1 | 1 | 0 | 1 | 0 | 0 | 0 | 0 | 0 | 1 | 4 |
| <u>CCDC126</u>  | 1 | 1 | 0 | 1 | 0 | 0 | 0 | 0 | 0 | 1 | 4 |
| <u>CLDN10</u>   | 1 | 1 | 0 | 1 | 0 | 0 | 0 | 0 | 0 | 1 | 4 |
| <u>CLDN8</u>    | 1 | 1 | 0 | 1 | 0 | 0 | 0 | 0 | 0 | 1 | 4 |
| <u>DIRAS3</u>   | 1 | 1 | 0 | 1 | 0 | 0 | 0 | 0 | 0 | 1 | 4 |
| <u>ZNF479</u>   | 1 | 1 | 0 | 1 | 0 | 0 | 0 | 0 | 0 | 1 | 4 |
| <u>IL33</u>     | 1 | 1 | 0 | 1 | 0 | 0 | 0 | 0 | 0 | 1 | 4 |
| <u>USP14</u>    | 1 | 1 | 0 | 1 | 0 | 0 | 0 | 0 | 0 | 1 | 4 |
| <u>ACVR1B</u>   | 1 | 1 | 0 | 1 | 0 | 0 | 0 | 0 | 0 | 1 | 4 |
| <u>MTMR6</u>    | 1 | 1 | 0 | 1 | 0 | 0 | 0 | 0 | 0 | 1 | 4 |
| <u>C12orf29</u> | 1 | 1 | 0 | 1 | 0 | 0 | 0 | 0 | 0 | 1 | 4 |
| <u>CD1E</u>     | 1 | 1 | 0 | 1 | 0 | 0 | 0 | 0 | 0 | 1 | 4 |
| <u>CD1E</u>     | 1 | 1 | 0 | 1 | 0 | 0 | 0 | 0 | 0 | 1 | 4 |
| <u>DDX60L</u>   | 1 | 1 | 0 | 1 | 0 | 0 | 0 | 0 | 0 | 1 | 4 |
| <u>CBFA2T2</u>  | 1 | 0 | 0 | 1 | 1 | 0 | 0 | 0 | 0 | 1 | 4 |
| <u>ISX</u>      | 1 | 1 | 0 | 1 | 0 | 0 | 0 | 0 | 0 | 1 | 4 |
| <u>RASL10B</u>  | 1 | 1 | 0 | 1 | 0 | 0 | 0 | 0 | 0 | 1 | 4 |
| <u>ATPAF2</u>   | 1 | 1 | 0 | 1 | 0 | 0 | 0 | 0 | 0 | 1 | 4 |
| <u>ZNF765</u>   | 1 | 1 | 0 | 1 | 0 | 0 | 0 | 0 | 0 | 1 | 4 |
| <u>MYADM</u>    | 1 | 1 | 0 | 1 | 0 | 0 | 0 | 0 | 0 | 1 | 4 |
| <u>SFRS2IP</u>  | 1 | 1 | 0 | 1 | 0 | 0 | 0 | 0 | 0 | 1 | 4 |
| <u>YTHDC1</u>   | 1 | 1 | 0 | 1 | 0 | 0 | 0 | 0 | 0 | 1 | 4 |
| <u>C14orf43</u> | 1 | 1 | 0 | 1 | 0 | 0 | 0 | 0 | 0 | 1 | 4 |

|                  |   |   |   |   |   |   |   |   |   |   |   |
|------------------|---|---|---|---|---|---|---|---|---|---|---|
| <u>C14orf43</u>  | 1 | 0 | 0 | 1 | 1 | 0 | 0 | 0 | 0 | 1 | 4 |
| <u>CABLES1</u>   | 1 | 1 | 0 | 1 | 0 | 0 | 0 | 0 | 0 | 1 | 4 |
| <u>DDX21</u>     | 1 | 1 | 0 | 1 | 0 | 0 | 0 | 0 | 0 | 1 | 4 |
| <u>ARRDC4</u>    | 1 | 1 | 0 | 1 | 0 | 0 | 0 | 0 | 0 | 1 | 4 |
| <u>FAM58A</u>    | 1 | 1 | 0 | 1 | 0 | 0 | 0 | 0 | 0 | 1 | 4 |
| <u>LMBRD2</u>    | 1 | 1 | 0 | 1 | 0 | 0 | 0 | 0 | 0 | 1 | 4 |
| <u>DLGAP2</u>    | 1 | 1 | 0 | 1 | 0 | 0 | 0 | 0 | 0 | 1 | 4 |
| <u>GLYATL1</u>   | 1 | 1 | 0 | 1 | 0 | 0 | 0 | 0 | 0 | 1 | 4 |
| <u>CACNA2D2</u>  | 1 | 0 | 0 | 1 | 1 | 0 | 0 | 0 | 0 | 1 | 4 |
| <u>MOBKL1A</u>   | 1 | 1 | 0 | 1 | 0 | 0 | 0 | 0 | 0 | 1 | 4 |
| <u>TIFA</u>      | 1 | 1 | 0 | 1 | 0 | 0 | 0 | 0 | 0 | 1 | 4 |
| <u>CCDC102A</u>  | 1 | 1 | 0 | 1 | 0 | 0 | 0 | 0 | 0 | 1 | 4 |
| <u>ADAMTSL1</u>  | 1 | 1 | 0 | 1 | 0 | 0 | 0 | 0 | 0 | 1 | 4 |
| <u>ACVR2B</u>    | 1 | 1 | 0 | 1 | 0 | 0 | 0 | 0 | 0 | 1 | 4 |
| <u>MS4A1</u>     | 1 | 1 | 0 | 1 | 0 | 0 | 0 | 0 | 0 | 1 | 4 |
| <u>PERLD1</u>    | 1 | 1 | 0 | 1 | 0 | 0 | 0 | 0 | 0 | 1 | 4 |
| <u>B4GALT6</u>   | 1 | 1 | 0 | 1 | 0 | 0 | 0 | 0 | 0 | 1 | 4 |
| <u>MAPK1IP1L</u> | 1 | 1 | 0 | 1 | 0 | 0 | 0 | 0 | 0 | 1 | 4 |
| <u>CACNA2D4</u>  | 1 | 1 | 0 | 1 | 0 | 0 | 0 | 0 | 0 | 1 | 4 |
| <u>MGC21874</u>  | 1 | 1 | 0 | 1 | 0 | 0 | 0 | 0 | 0 | 1 | 4 |
| <u>KL</u>        | 1 | 1 | 0 | 1 | 0 | 0 | 0 | 0 | 0 | 1 | 4 |
| <u>ARHGAP18</u>  | 1 | 1 | 0 | 1 | 0 | 0 | 0 | 0 | 0 | 1 | 4 |
| <u>CADPS2</u>    | 1 | 1 | 0 | 1 | 0 | 0 | 0 | 0 | 0 | 1 | 4 |
| <u>SLC9A3R1</u>  | 1 | 1 | 0 | 1 | 0 | 0 | 0 | 0 | 0 | 1 | 4 |
| <u>ADIPOQ</u>    | 1 | 1 | 0 | 1 | 0 | 0 | 0 | 0 | 0 | 1 | 4 |
| <u>KIF3B</u>     | 1 | 1 | 0 | 1 | 0 | 0 | 0 | 0 | 0 | 1 | 4 |
| <u>CIAO1</u>     | 1 | 1 | 0 | 1 | 0 | 0 | 0 | 0 | 0 | 1 | 4 |
| <u>ACVRL1</u>    | 1 | 1 | 0 | 1 | 0 | 0 | 0 | 0 | 0 | 1 | 4 |
| <u>ZRANB2</u>    | 1 | 1 | 0 | 1 | 0 | 0 | 0 | 0 | 0 | 1 | 4 |
| <u>TMPRSS11D</u> | 1 | 1 | 0 | 1 | 0 | 0 | 0 | 0 | 0 | 1 | 4 |
| <u>SFXN5</u>     | 1 | 1 | 0 | 1 | 0 | 0 | 0 | 0 | 0 | 1 | 4 |
| <u>SYTL4</u>     | 1 | 1 | 0 | 1 | 0 | 0 | 0 | 0 | 0 | 1 | 4 |
| <u>ARHGAP12</u>  | 1 | 1 | 0 | 1 | 0 | 0 | 0 | 0 | 0 | 1 | 4 |
| <u>ZNF264</u>    | 1 | 1 | 0 | 1 | 0 | 0 | 0 | 0 | 0 | 1 | 4 |
| <u>CDYL</u>      | 0 | 0 | 0 | 1 | 1 | 1 | 0 | 0 | 0 | 1 | 4 |
| <u>CDYL</u>      | 0 | 0 | 0 | 1 | 1 | 1 | 0 | 0 | 0 | 1 | 4 |
| <u>MED26</u>     | 1 | 1 | 0 | 1 | 0 | 0 | 0 | 0 | 0 | 1 | 4 |
| <u>OKI</u>       | 1 | 1 | 0 | 1 | 0 | 0 | 0 | 0 | 0 | 1 | 4 |
| <u>OKI</u>       | 1 | 1 | 0 | 1 | 0 | 0 | 0 | 0 | 0 | 1 | 4 |
| <u>GGPS1</u>     | 1 | 1 | 0 | 1 | 0 | 0 | 0 | 0 | 0 | 1 | 4 |
| <u>HAND2</u>     | 1 | 1 | 0 | 1 | 0 | 0 | 0 | 0 | 0 | 1 | 4 |

|                 |   |   |   |   |   |   |   |   |   |   |   |
|-----------------|---|---|---|---|---|---|---|---|---|---|---|
| <u>PCYT1B</u>   | 1 | 1 | 0 | 1 | 0 | 0 | 0 | 0 | 0 | 1 | 4 |
| <u>MED20</u>    | 1 | 1 | 0 | 1 | 0 | 0 | 0 | 0 | 0 | 1 | 4 |
| <u>ONECUT2</u>  | 1 | 1 | 0 | 1 | 0 | 0 | 0 | 0 | 0 | 1 | 4 |
| <u>SLC4A7</u>   | 1 | 1 | 0 | 1 | 0 | 0 | 0 | 0 | 0 | 1 | 4 |
| <u>SLC4A8</u>   | 1 | 1 | 0 | 1 | 0 | 0 | 0 | 0 | 0 | 1 | 4 |
| <u>EEF1E1</u>   | 1 | 1 | 0 | 1 | 0 | 0 | 0 | 0 | 0 | 1 | 4 |
| <u>BAG5</u>     | 1 | 1 | 0 | 1 | 0 | 0 | 0 | 0 | 0 | 1 | 4 |
| <u>BAG4</u>     | 1 | 1 | 0 | 1 | 0 | 0 | 0 | 0 | 0 | 1 | 4 |
| <u>BAG2</u>     | 1 | 1 | 0 | 1 | 0 | 0 | 0 | 0 | 0 | 1 | 4 |
| <u>ENTPD6</u>   | 1 | 1 | 0 | 1 | 0 | 0 | 0 | 0 | 0 | 1 | 4 |
| <u>H6PD</u>     | 1 | 1 | 0 | 1 | 0 | 0 | 0 | 0 | 0 | 1 | 4 |
| <u>TSGA14</u>   | 1 | 1 | 0 | 1 | 0 | 0 | 0 | 0 | 0 | 1 | 4 |
| <u>CREB5</u>    | 1 | 1 | 0 | 1 | 0 | 0 | 0 | 0 | 0 | 1 | 4 |
| <u>RNF14</u>    | 1 | 1 | 0 | 1 | 0 | 0 | 0 | 0 | 0 | 1 | 4 |
| <u>GDA</u>      | 1 | 1 | 0 | 1 | 0 | 0 | 0 | 0 | 0 | 1 | 4 |
| <u>MTL5</u>     | 1 | 1 | 0 | 1 | 0 | 0 | 0 | 0 | 0 | 1 | 4 |
| <u>MTL5</u>     | 1 | 1 | 0 | 1 | 0 | 0 | 0 | 0 | 0 | 1 | 4 |
| <u>GCC2</u>     | 1 | 1 | 0 | 1 | 0 | 0 | 0 | 0 | 0 | 1 | 4 |
| <u>HS2ST1</u>   | 1 | 1 | 0 | 1 | 0 | 0 | 0 | 0 | 0 | 1 | 4 |
| <u>SOCS5</u>    | 1 | 1 | 0 | 1 | 0 | 0 | 0 | 0 | 0 | 1 | 4 |
| <u>CD59</u>     | 1 | 1 | 0 | 1 | 0 | 0 | 0 | 0 | 0 | 1 | 4 |
| <u>CEP135</u>   | 1 | 1 | 0 | 1 | 0 | 0 | 0 | 0 | 0 | 1 | 4 |
| <u>WSCD2</u>    | 1 | 1 | 0 | 1 | 0 | 0 | 0 | 0 | 0 | 1 | 4 |
| <u>CD69</u>     | 1 | 1 | 0 | 1 | 0 | 0 | 0 | 0 | 0 | 1 | 4 |
| <u>EDEM1</u>    | 1 | 1 | 0 | 1 | 0 | 0 | 0 | 0 | 0 | 1 | 4 |
| <u>ACYP1</u>    | 1 | 1 | 0 | 1 | 0 | 0 | 0 | 0 | 0 | 1 | 4 |
| <u>ACYP1</u>    | 1 | 1 | 0 | 1 | 0 | 0 | 0 | 0 | 0 | 1 | 4 |
| <u>KIAA0226</u> | 1 | 1 | 0 | 1 | 0 | 0 | 0 | 0 | 0 | 1 | 4 |
| <u>USP6NL</u>   | 1 | 1 | 0 | 1 | 0 | 0 | 0 | 0 | 0 | 1 | 4 |
| <u>SEC14L5</u>  | 1 | 1 | 0 | 1 | 0 | 0 | 0 | 0 | 0 | 1 | 4 |
| <u>NOS1AP</u>   | 1 | 1 | 0 | 1 | 0 | 0 | 0 | 0 | 0 | 1 | 4 |
| <u>SEMA3E</u>   | 1 | 1 | 0 | 1 | 0 | 0 | 0 | 0 | 0 | 1 | 4 |
| <u>KIAA0408</u> | 1 | 1 | 0 | 1 | 0 | 0 | 0 | 0 | 0 | 1 | 4 |
| <u>DOCK4</u>    | 1 | 1 | 0 | 1 | 0 | 0 | 0 | 0 | 0 | 1 | 4 |
| <u>CP110</u>    | 1 | 1 | 0 | 1 | 0 | 0 | 0 | 0 | 0 | 1 | 4 |
| <u>SLK</u>      | 1 | 1 | 0 | 1 | 0 | 0 | 0 | 0 | 0 | 1 | 4 |
| <u>PHACTR2</u>  | 1 | 1 | 0 | 1 | 0 | 0 | 0 | 0 | 0 | 1 | 4 |
| <u>PCDHA9</u>   | 1 | 1 | 0 | 1 | 0 | 0 | 0 | 0 | 0 | 1 | 4 |
| <u>ZFYVE16</u>  | 1 | 1 | 0 | 1 | 0 | 0 | 0 | 0 | 0 | 1 | 4 |
| <u>KIAA0247</u> | 1 | 1 | 0 | 1 | 0 | 0 | 0 | 0 | 0 | 1 | 4 |
| <u>RASSF2</u>   | 1 | 1 | 0 | 1 | 0 | 0 | 0 | 0 | 0 | 1 | 4 |

|                  |   |   |   |   |   |   |   |   |   |   |   |
|------------------|---|---|---|---|---|---|---|---|---|---|---|
| <u>RAPGEF5</u>   | 1 | 1 | 0 | 1 | 0 | 0 | 0 | 0 | 0 | 1 | 4 |
| <u>SERTAD2</u>   | 1 | 1 | 0 | 1 | 0 | 0 | 0 | 0 | 0 | 1 | 4 |
| <u>DAZAP2</u>    | 1 | 0 | 0 | 1 | 1 | 0 | 0 | 0 | 0 | 1 | 4 |
| <u>KIAA0494</u>  | 1 | 1 | 0 | 1 | 0 | 0 | 0 | 0 | 0 | 1 | 4 |
| <u>GIT2</u>      | 1 | 1 | 0 | 1 | 0 | 0 | 0 | 0 | 0 | 1 | 4 |
| <u>SPATA2</u>    | 1 | 1 | 0 | 1 | 0 | 0 | 0 | 0 | 0 | 1 | 4 |
| <u>ARHGEF17</u>  | 1 | 1 | 0 | 1 | 0 | 0 | 0 | 0 | 0 | 1 | 4 |
| <u>MELK</u>      | 1 | 1 | 0 | 1 | 0 | 0 | 0 | 0 | 0 | 1 | 4 |
| <u>ZBTB24</u>    | 1 | 1 | 0 | 1 | 0 | 0 | 0 | 0 | 0 | 1 | 4 |
| <u>GAB2</u>      | 1 | 1 | 0 | 1 | 0 | 0 | 0 | 0 | 0 | 1 | 4 |
| <u>MFAP3L</u>    | 1 | 1 | 0 | 1 | 0 | 0 | 0 | 0 | 0 | 1 | 4 |
| <u>CEP350</u>    | 1 | 1 | 0 | 1 | 0 | 0 | 0 | 0 | 0 | 1 | 4 |
| <u>PJA2</u>      | 1 | 1 | 0 | 1 | 0 | 0 | 0 | 0 | 0 | 1 | 4 |
| <u>ZC3H11A</u>   | 1 | 1 | 0 | 1 | 0 | 0 | 0 | 0 | 0 | 1 | 4 |
| <u>DDX46</u>     | 1 | 1 | 0 | 1 | 0 | 0 | 0 | 0 | 0 | 1 | 4 |
| <u>LBA1</u>      | 1 | 1 | 0 | 1 | 0 | 0 | 0 | 0 | 0 | 1 | 4 |
| <u>TBC1D4</u>    | 1 | 1 | 0 | 1 | 0 | 0 | 0 | 0 | 0 | 1 | 4 |
| <u>OSBPL2</u>    | 1 | 1 | 0 | 1 | 0 | 0 | 0 | 0 | 0 | 1 | 4 |
| <u>SMG7</u>      | 1 | 1 | 0 | 1 | 0 | 0 | 0 | 0 | 0 | 1 | 4 |
| <u>KIAA0196</u>  | 1 | 1 | 0 | 1 | 0 | 0 | 0 | 0 | 0 | 1 | 4 |
| <u>SV2A</u>      | 1 | 1 | 0 | 1 | 0 | 0 | 0 | 0 | 0 | 1 | 4 |
| <u>KBTBD11</u>   | 1 | 1 | 0 | 1 | 0 | 0 | 0 | 0 | 0 | 1 | 4 |
| <u>ZBTB40</u>    | 1 | 1 | 0 | 1 | 0 | 0 | 0 | 0 | 0 | 1 | 4 |
| <u>LPGAT1</u>    | 1 | 1 | 0 | 1 | 0 | 0 | 0 | 0 | 0 | 1 | 4 |
| <u>CDC25A</u>    | 1 | 1 | 0 | 1 | 0 | 0 | 0 | 0 | 0 | 1 | 4 |
| <u>HELZ</u>      | 1 | 1 | 0 | 1 | 0 | 0 | 0 | 0 | 0 | 1 | 4 |
| <u>RBM8A</u>     | 1 | 1 | 0 | 1 | 0 | 0 | 0 | 0 | 0 | 1 | 4 |
| <u>HS3ST3A1</u>  | 1 | 1 | 0 | 1 | 0 | 0 | 0 | 0 | 0 | 1 | 4 |
| <u>HS3ST2</u>    | 1 | 1 | 0 | 1 | 0 | 0 | 0 | 0 | 0 | 1 | 4 |
| <u>SLC23A2</u>   | 1 | 1 | 0 | 1 | 0 | 0 | 0 | 0 | 0 | 1 | 4 |
| <u>TNFSF15</u>   | 1 | 1 | 0 | 1 | 0 | 0 | 0 | 0 | 0 | 1 | 4 |
| <u>REC8</u>      | 1 | 1 | 0 | 1 | 0 | 0 | 0 | 0 | 0 | 1 | 4 |
| <u>DGCR2</u>     | 1 | 1 | 0 | 1 | 0 | 0 | 0 | 0 | 0 | 1 | 4 |
| <u>CTCF</u>      | 1 | 1 | 0 | 0 | 1 | 0 | 0 | 0 | 0 | 1 | 4 |
| <u>FLJ38973</u>  | 1 | 1 | 0 | 0 | 1 | 0 | 0 | 0 | 0 | 1 | 4 |
| <u>BTBD3</u>     | 1 | 0 | 0 | 0 | 1 | 1 | 0 | 0 | 0 | 1 | 4 |
| <u>PALLD</u>     | 1 | 1 | 0 | 0 | 1 | 0 | 0 | 0 | 0 | 1 | 4 |
| <u>NPTN</u>      | 1 | 0 | 0 | 0 | 1 | 1 | 0 | 0 | 0 | 1 | 4 |
| <u>LOC388272</u> | 1 | 1 | 0 | 0 | 1 | 0 | 0 | 0 | 0 | 1 | 4 |
| <u>NPC1</u>      | 1 | 1 | 0 | 0 | 1 | 0 | 0 | 0 | 0 | 1 | 4 |
| <u>ATP2A2</u>    | 1 | 1 | 0 | 0 | 1 | 1 | 0 | 0 | 0 | 0 | 4 |

|                 |   |   |   |   |   |   |   |   |   |   |   |
|-----------------|---|---|---|---|---|---|---|---|---|---|---|
| <u>PAM</u>      | 1 | 0 | 0 | 0 | 1 | 1 | 0 | 0 | 0 | 1 | 4 |
| <u>TMED5</u>    | 1 | 1 | 0 | 0 | 1 | 0 | 0 | 0 | 0 | 1 | 4 |
| <u>PDK4</u>     | 1 | 1 | 0 | 0 | 1 | 0 | 0 | 0 | 0 | 1 | 4 |
| <u>PPP1CB</u>   | 1 | 0 | 0 | 0 | 1 | 1 | 0 | 0 | 0 | 1 | 4 |
| <u>PRKCD</u>    | 1 | 0 | 0 | 0 | 1 | 1 | 0 | 0 | 0 | 1 | 4 |
| <u>PTPN9</u>    | 1 | 1 | 0 | 0 | 1 | 0 | 0 | 0 | 0 | 1 | 4 |
| <u>PAPOLG</u>   | 1 | 1 | 0 | 0 | 1 | 0 | 0 | 0 | 0 | 1 | 4 |
| <u>TAF5</u>     | 1 | 1 | 0 | 0 | 1 | 0 | 0 | 0 | 0 | 1 | 4 |
| <u>HSP90B1</u>  | 1 | 1 | 0 | 0 | 1 | 0 | 0 | 0 | 0 | 1 | 4 |
| <u>SGPP1</u>    | 1 | 1 | 0 | 0 | 1 | 0 | 0 | 0 | 0 | 1 | 4 |
| <u>ZNF644</u>   | 1 | 1 | 0 | 0 | 1 | 1 | 0 | 0 | 0 | 0 | 4 |
| <u>ATRN</u>     | 1 | 1 | 0 | 0 | 1 | 0 | 0 | 0 | 0 | 1 | 4 |
| <u>C12orf34</u> | 1 | 1 | 0 | 0 | 1 | 1 | 0 | 0 | 0 | 0 | 4 |
| <u>ACTL6A</u>   | 1 | 1 | 0 | 0 | 1 | 0 | 0 | 0 | 0 | 1 | 4 |
| <u>RAB11A</u>   | 1 | 1 | 0 | 0 | 1 | 0 | 0 | 0 | 0 | 1 | 4 |
| <u>CACNA2D2</u> | 1 | 1 | 0 | 0 | 1 | 0 | 0 | 0 | 0 | 1 | 4 |
| <u>CD163</u>    | 1 | 1 | 0 | 0 | 1 | 0 | 0 | 0 | 0 | 1 | 4 |
| <u>CD163</u>    | 1 | 1 | 0 | 0 | 1 | 0 | 0 | 0 | 0 | 1 | 4 |
| <u>NRXN3</u>    | 1 | 1 | 0 | 0 | 1 | 0 | 0 | 0 | 0 | 1 | 4 |
| <u>PUM1</u>     | 1 | 0 | 0 | 0 | 1 | 1 | 0 | 0 | 0 | 1 | 4 |
| <u>HERPUD1</u>  | 1 | 1 | 0 | 0 | 1 | 1 | 0 | 0 | 0 | 0 | 4 |
| <u>PCDHA3</u>   | 0 | 1 | 0 | 0 | 1 | 1 | 0 | 0 | 0 | 1 | 4 |
| <u>ABI1</u>     | 1 | 1 | 0 | 1 | 0 | 0 | 0 | 0 | 0 | 1 | 4 |
| <u>GNPDA1</u>   | 1 | 1 | 0 | 1 | 0 | 0 | 1 | 0 | 0 | 0 | 4 |
| <u>BCL2L11</u>  | 1 | 0 | 0 | 1 | 1 | 0 | 0 | 0 | 0 | 1 | 4 |
| <u>HMG2L1</u>   | 1 | 1 | 0 | 1 | 0 | 0 | 0 | 0 | 0 | 1 | 4 |
| <u>SMC4</u>     | 1 | 0 | 0 | 1 | 0 | 0 | 1 | 1 | 0 | 0 | 4 |
| <u>GJC1</u>     | 1 | 1 | 0 | 1 | 0 | 0 | 0 | 0 | 0 | 1 | 4 |
| <u>GJC1</u>     | 1 | 0 | 0 | 1 | 0 | 0 | 1 | 0 | 0 | 1 | 4 |
| <u>RWDD2B</u>   | 1 | 1 | 0 | 1 | 0 | 0 | 1 | 0 | 0 | 0 | 4 |
| <u>SGK2</u>     | 1 | 1 | 0 | 1 | 0 | 0 | 1 | 0 | 0 | 0 | 4 |
| <u>ARL4C</u>    | 1 | 1 | 0 | 1 | 0 | 0 | 1 | 0 | 0 | 0 | 4 |
| <u>SFRS14</u>   | 1 | 1 | 0 | 1 | 0 | 0 | 0 | 0 | 0 | 1 | 4 |
| <u>GPR64</u>    | 1 | 1 | 0 | 1 | 0 | 0 | 0 | 0 | 0 | 1 | 4 |
| <u>GPR64</u>    | 1 | 0 | 0 | 1 | 0 | 0 | 1 | 0 | 0 | 1 | 4 |
| <u>ZNF197</u>   | 1 | 1 | 0 | 1 | 0 | 0 | 0 | 0 | 0 | 1 | 4 |
| <u>DHRS9</u>    | 1 | 0 | 0 | 1 | 0 | 0 | 1 | 0 | 0 | 1 | 4 |
| <u>NME6</u>     | 1 | 1 | 0 | 1 | 0 | 0 | 1 | 0 | 0 | 0 | 4 |
| <u>TRIM13</u>   | 1 | 0 | 0 | 1 | 1 | 1 | 0 | 0 | 0 | 0 | 4 |
| <u>TRIM13</u>   | 1 | 0 | 0 | 1 | 1 | 1 | 0 | 0 | 0 | 0 | 4 |
| <u>EIF1</u>     | 1 | 1 | 0 | 1 | 0 | 0 | 1 | 0 | 0 | 0 | 4 |

|               |   |   |   |   |   |   |   |   |   |   |   |
|---------------|---|---|---|---|---|---|---|---|---|---|---|
| <u>CDK6</u>   | 1 | 0 | 0 | 1 | 0 | 0 | 1 | 0 | 0 | 1 | 4 |
| <u>AP3S2</u>  | 1 | 0 | 0 | 1 | 0 | 0 | 1 | 0 | 0 | 1 | 4 |
| <u>GLYAT</u>  | 1 | 1 | 0 | 1 | 0 | 0 | 1 | 0 | 0 | 0 | 4 |
| <u>BET1</u>   | 0 | 1 | 0 | 1 | 0 | 0 | 1 | 0 | 0 | 1 | 4 |
| <u>PAK4</u>   | 1 | 0 | 0 | 1 | 0 | 0 | 1 | 0 | 0 | 1 | 4 |
| <u>PAK4</u>   | 1 | 1 | 0 | 1 | 0 | 0 | 0 | 0 | 0 | 1 | 4 |
| <u>COX4NB</u> | 1 | 1 | 0 | 1 | 0 | 0 | 1 | 0 | 0 | 0 | 4 |
| <u>ADARB1</u> | 1 | 0 | 0 | 1 | 1 | 0 | 0 | 0 | 0 | 1 | 4 |
| <u>VAV3</u>   | 1 | 1 | 0 | 1 | 0 | 0 | 1 | 0 | 0 | 0 | 4 |
| <u>SLC9A6</u> | 1 | 0 | 0 | 1 | 1 | 0 | 0 | 0 | 0 | 1 | 4 |
| <u>STK25</u>  | 1 | 1 | 0 | 1 | 0 | 0 | 1 | 0 | 0 | 0 | 4 |
| <u>CEBPA</u>  | 0 | 1 | 0 | 1 | 0 | 0 | 1 | 0 | 0 | 1 | 4 |
| <u>HYOU1</u>  | 1 | 1 | 0 | 1 | 0 | 0 | 0 | 0 | 0 | 1 | 4 |
| <u>AGPAT1</u> | 1 | 0 | 0 | 1 | 1 | 0 | 0 | 0 | 0 | 1 | 4 |
| <u>SPTLC1</u> | 1 | 1 | 0 | 1 | 0 | 0 | 0 | 0 | 0 | 1 | 4 |
| <u>MTX2</u>   | 1 | 1 | 0 | 1 | 0 | 0 | 0 | 0 | 0 | 1 | 4 |
| <u>YKT6</u>   | 1 | 1 | 0 | 1 | 0 | 0 | 1 | 0 | 0 | 0 | 4 |
| <u>PNMA2</u>  | 0 | 1 | 0 | 1 | 0 | 0 | 1 | 0 | 0 | 1 | 4 |
| <u>C1orf2</u> | 1 | 0 | 0 | 1 | 1 | 0 | 0 | 0 | 0 | 1 | 4 |
| <u>CFL1</u>   | 1 | 1 | 0 | 1 | 0 | 0 | 1 | 0 | 0 | 0 | 4 |
| <u>NFAT5</u>  | 1 | 0 | 0 | 1 | 1 | 0 | 0 | 0 | 0 | 1 | 4 |
| <u>NFAT5</u>  | 1 | 0 | 0 | 1 | 1 | 0 | 0 | 0 | 0 | 1 | 4 |
| <u>CTSC</u>   | 0 | 1 | 0 | 1 | 0 | 0 | 1 | 0 | 0 | 1 | 4 |
| <u>GJB6</u>   | 1 | 1 | 0 | 1 | 0 | 0 | 0 | 0 | 0 | 1 | 4 |
| <u>FRS2</u>   | 1 | 1 | 0 | 1 | 0 | 0 | 0 | 0 | 0 | 1 | 4 |
| <u>FRS2</u>   | 1 | 0 | 0 | 1 | 0 | 0 | 1 | 0 | 0 | 1 | 4 |
| <u>C5orf3</u> | 1 | 1 | 0 | 1 | 0 | 0 | 1 | 0 | 0 | 0 | 4 |
| <u>PDE10A</u> | 1 | 0 | 0 | 1 | 0 | 0 | 1 | 0 | 0 | 1 | 4 |
| <u>MSL3L1</u> | 1 | 1 | 0 | 1 | 0 | 0 | 1 | 0 | 0 | 0 | 4 |
| <u>GCN1L1</u> | 1 | 1 | 0 | 1 | 0 | 0 | 1 | 0 | 0 | 0 | 4 |
| <u>KDEL2</u>  | 1 | 1 | 0 | 1 | 0 | 0 | 0 | 0 | 0 | 1 | 4 |
| <u>LILRB3</u> | 0 | 1 | 0 | 1 | 0 | 0 | 1 | 0 | 0 | 1 | 4 |
| <u>DDX52</u>  | 1 | 1 | 0 | 1 | 0 | 0 | 0 | 0 | 0 | 1 | 4 |
| <u>DDX52</u>  | 0 | 0 | 1 | 1 | 0 | 0 | 1 | 0 | 0 | 1 | 4 |
| <u>CHD2</u>   | 0 | 1 | 0 | 1 | 0 | 0 | 1 | 0 | 0 | 1 | 4 |
| <u>DIDO1</u>  | 1 | 1 | 0 | 1 | 0 | 0 | 0 | 0 | 0 | 1 | 4 |
| <u>BTN2A1</u> | 1 | 1 | 0 | 1 | 0 | 0 | 1 | 0 | 0 | 0 | 4 |
| <u>ZWINT</u>  | 1 | 1 | 0 | 1 | 0 | 0 | 1 | 0 | 0 | 0 | 4 |
| <u>DMC1</u>   | 1 | 1 | 0 | 1 | 0 | 0 | 1 | 0 | 0 | 0 | 4 |
| <u>NUDT4</u>  | 1 | 1 | 0 | 1 | 0 | 0 | 0 | 0 | 0 | 1 | 4 |
| <u>PSIP1</u>  | 1 | 1 | 0 | 1 | 0 | 0 | 0 | 0 | 0 | 1 | 4 |



|                 |   |   |   |   |   |   |   |   |   |   |   |
|-----------------|---|---|---|---|---|---|---|---|---|---|---|
| <u>PSIP1</u>    | 1 | 0 | 0 | 1 | 0 | 0 | 1 | 0 | 0 | 1 | 4 |
| <u>FAM107A</u>  | 1 | 1 | 0 | 1 | 0 | 0 | 0 | 0 | 0 | 1 | 4 |
| <u>FAM107A</u>  | 1 | 0 | 0 | 1 | 0 | 0 | 1 | 0 | 0 | 1 | 4 |
| <u>LZTS1</u>    | 1 | 1 | 0 | 1 | 0 | 0 | 1 | 0 | 0 | 0 | 4 |
| <u>ADCY6</u>    | 1 | 1 | 0 | 1 | 0 | 0 | 1 | 0 | 0 | 0 | 4 |
| <u>LARP4</u>    | 1 | 1 | 0 | 1 | 0 | 0 | 0 | 0 | 0 | 1 | 4 |
| <u>TMEM106A</u> | 1 | 1 | 0 | 1 | 0 | 0 | 0 | 0 | 0 | 1 | 4 |
| <u>RNF13</u>    | 1 | 0 | 0 | 1 | 0 | 0 | 1 | 0 | 0 | 1 | 4 |
| <u>RNF13</u>    | 1 | 1 | 0 | 1 | 0 | 0 | 0 | 0 | 0 | 1 | 4 |
| <u>ZNF257</u>   | 0 | 1 | 0 | 1 | 0 | 0 | 1 | 0 | 0 | 1 | 4 |
| <u>PALM2</u>    | 0 | 0 | 1 | 1 | 0 | 0 | 1 | 0 | 0 | 1 | 4 |
| <u>EFHC1</u>    | 0 | 1 | 0 | 1 | 0 | 0 | 1 | 0 | 0 | 1 | 4 |
| <u>CHRNE</u>    | 1 | 1 | 0 | 1 | 0 | 0 | 1 | 0 | 0 | 0 | 4 |
| <u>ERMAP</u>    | 1 | 1 | 0 | 1 | 0 | 0 | 0 | 0 | 0 | 1 | 4 |
| <u>SORCS1</u>   | 1 | 1 | 0 | 1 | 0 | 0 | 0 | 0 | 0 | 1 | 4 |
| <u>OSBPL8</u>   | 1 | 0 | 0 | 1 | 1 | 0 | 0 | 0 | 0 | 1 | 4 |
| <u>C1QTNF3</u>  | 1 | 1 | 0 | 1 | 0 | 0 | 1 | 0 | 0 | 0 | 4 |
| <u>C1QTNF7</u>  | 1 | 1 | 0 | 1 | 0 | 0 | 0 | 0 | 0 | 1 | 4 |
| <u>ZNF618</u>   | 0 | 1 | 0 | 1 | 0 | 0 | 1 | 0 | 0 | 1 | 4 |
| <u>MARCH3</u>   | 1 | 1 | 0 | 1 | 0 | 0 | 1 | 0 | 0 | 0 | 4 |
| <u>OMA1</u>     | 1 | 1 | 0 | 1 | 0 | 0 | 1 | 0 | 0 | 0 | 4 |
| <u>GBP4</u>     | 1 | 1 | 0 | 1 | 0 | 0 | 1 | 0 | 0 | 0 | 4 |
| <u>CISH</u>     | 1 | 1 | 0 | 1 | 0 | 0 | 0 | 0 | 0 | 1 | 4 |
| <u>LRRC58</u>   | 0 | 1 | 0 | 1 | 0 | 0 | 1 | 0 | 0 | 1 | 4 |
| <u>IL22RA2</u>  | 1 | 1 | 0 | 1 | 0 | 0 | 0 | 0 | 0 | 1 | 4 |
| <u>LEAP2</u>    | 1 | 1 | 0 | 1 | 0 | 0 | 1 | 0 | 0 | 0 | 4 |
| <u>RAB3IP</u>   | 1 | 1 | 0 | 1 | 0 | 0 | 0 | 0 | 0 | 1 | 4 |
| <u>RAB3IP</u>   | 1 | 1 | 0 | 1 | 0 | 0 | 0 | 0 | 0 | 1 | 4 |
| <u>MRGPRX2</u>  | 1 | 1 | 0 | 1 | 0 | 0 | 1 | 0 | 0 | 0 | 4 |
| <u>ADD1</u>     | 1 | 1 | 0 | 1 | 0 | 0 | 0 | 0 | 0 | 1 | 4 |
| <u>ADD1</u>     | 1 | 0 | 0 | 1 | 0 | 0 | 1 | 0 | 0 | 1 | 4 |
| <u>CLCN4</u>    | 0 | 1 | 0 | 1 | 0 | 0 | 1 | 0 | 0 | 1 | 4 |
| <u>CLCN5</u>    | 1 | 1 | 0 | 1 | 0 | 0 | 0 | 0 | 0 | 1 | 4 |
| <u>ANTXR2</u>   | 0 | 1 | 0 | 1 | 0 | 0 | 1 | 0 | 0 | 1 | 4 |
| <u>FAM24A</u>   | 1 | 1 | 0 | 1 | 0 | 0 | 1 | 0 | 0 | 0 | 4 |
| <u>C1orf83</u>  | 1 | 1 | 0 | 1 | 0 | 0 | 0 | 0 | 0 | 1 | 4 |
| <u>C1orf83</u>  | 1 | 0 | 0 | 1 | 0 | 0 | 1 | 0 | 0 | 1 | 4 |
| <u>ZFYVE27</u>  | 1 | 0 | 0 | 1 | 0 | 0 | 1 | 0 | 0 | 1 | 4 |
| <u>ZFYVE27</u>  | 1 | 1 | 0 | 1 | 0 | 0 | 0 | 0 | 0 | 1 | 4 |
| <u>PNLIPRP3</u> | 1 | 1 | 0 | 1 | 0 | 0 | 1 | 0 | 0 | 0 | 4 |
| <u>CLTC</u>     | 1 | 1 | 0 | 1 | 0 | 0 | 1 | 0 | 0 | 0 | 4 |

|                  |   |   |   |   |   |   |   |   |   |   |   |
|------------------|---|---|---|---|---|---|---|---|---|---|---|
| <u>SLAIN1</u>    | 1 | 0 | 0 | 1 | 1 | 1 | 0 | 0 | 0 | 0 | 4 |
| <u>SOCS4</u>     | 1 | 1 | 0 | 1 | 0 | 0 | 0 | 0 | 0 | 1 | 4 |
| <u>CCR3</u>      | 1 | 1 | 0 | 1 | 0 | 0 | 0 | 0 | 0 | 1 | 4 |
| <u>SLC38A10</u>  | 1 | 1 | 0 | 1 | 0 | 0 | 1 | 0 | 0 | 0 | 4 |
| <u>CANT1</u>     | 1 | 0 | 0 | 1 | 0 | 0 | 1 | 0 | 0 | 1 | 4 |
| <u>USH1G</u>     | 1 | 1 | 0 | 1 | 0 | 0 | 1 | 0 | 0 | 0 | 4 |
| <u>C18orf37</u>  | 1 | 1 | 0 | 1 | 0 | 0 | 1 | 0 | 0 | 0 | 4 |
| <u>COL1A2</u>    | 1 | 1 | 0 | 1 | 0 | 0 | 1 | 0 | 0 | 0 | 4 |
| <u>C20orf85</u>  | 1 | 1 | 0 | 1 | 0 | 0 | 1 | 0 | 0 | 0 | 4 |
| <u>TBC1D20</u>   | 1 | 1 | 0 | 1 | 0 | 0 | 1 | 0 | 0 | 0 | 4 |
| <u>C22orf39</u>  | 0 | 1 | 0 | 1 | 0 | 0 | 1 | 0 | 0 | 1 | 4 |
| <u>XIRP2</u>     | 1 | 1 | 0 | 1 | 0 | 0 | 1 | 0 | 0 | 0 | 4 |
| <u>LOC130074</u> | 1 | 1 | 0 | 1 | 0 | 0 | 1 | 0 | 0 | 0 | 4 |
| <u>ALS2CR12</u>  | 1 | 1 | 0 | 1 | 0 | 0 | 0 | 0 | 0 | 1 | 4 |
| <u>ALS2CR12</u>  | 1 | 0 | 0 | 1 | 0 | 0 | 1 | 0 | 0 | 1 | 4 |
| <u>LYPD6</u>     | 1 | 1 | 0 | 1 | 0 | 0 | 1 | 0 | 0 | 0 | 4 |
| <u>CD200R1</u>   | 1 | 0 | 0 | 1 | 0 | 0 | 1 | 0 | 0 | 1 | 4 |
| <u>CD200R1</u>   | 1 | 1 | 0 | 1 | 0 | 0 | 0 | 0 | 0 | 1 | 4 |
| <u>GLYCTK</u>    | 1 | 1 | 0 | 1 | 0 | 0 | 1 | 0 | 0 | 0 | 4 |
| <u>SYNPR</u>     | 1 | 1 | 0 | 1 | 0 | 0 | 0 | 0 | 0 | 1 | 4 |
| <u>TMEM155</u>   | 1 | 1 | 0 | 1 | 0 | 0 | 1 | 0 | 0 | 0 | 4 |
| <u>DNAJC21</u>   | 1 | 1 | 0 | 1 | 0 | 0 | 0 | 0 | 0 | 1 | 4 |
| <u>GRPEL2</u>    | 1 | 1 | 0 | 1 | 0 | 0 | 1 | 0 | 0 | 0 | 4 |
| <u>ADAT2</u>     | 0 | 1 | 0 | 1 | 0 | 0 | 1 | 0 | 0 | 1 | 4 |
| <u>ADORA2A</u>   | 1 | 1 | 0 | 1 | 0 | 0 | 1 | 0 | 0 | 0 | 4 |
| <u>PM20D2</u>    | 1 | 1 | 0 | 1 | 0 | 0 | 1 | 0 | 0 | 0 | 4 |
| <u>CP</u>        | 1 | 1 | 0 | 1 | 0 | 0 | 1 | 0 | 0 | 0 | 4 |
| <u>LRGUK</u>     | 1 | 1 | 0 | 1 | 0 | 0 | 1 | 0 | 0 | 0 | 4 |
| <u>WDR21C</u>    | 0 | 1 | 0 | 1 | 0 | 0 | 1 | 0 | 0 | 1 | 4 |
| <u>PTPDC1</u>    | 1 | 1 | 0 | 1 | 0 | 0 | 0 | 0 | 0 | 1 | 4 |
| <u>PTPDC1</u>    | 1 | 0 | 0 | 1 | 0 | 0 | 1 | 0 | 0 | 1 | 4 |
| <u>C9orf23</u>   | 1 | 1 | 0 | 1 | 0 | 0 | 0 | 0 | 0 | 1 | 4 |
| <u>C9orf23</u>   | 1 | 0 | 0 | 1 | 0 | 0 | 1 | 0 | 0 | 1 | 4 |
| <u>CRHBP</u>     | 1 | 1 | 0 | 1 | 0 | 0 | 1 | 0 | 0 | 0 | 4 |
| <u>MYO3B</u>     | 1 | 1 | 0 | 1 | 0 | 0 | 1 | 0 | 0 | 0 | 4 |
| <u>RIMS4</u>     | 1 | 1 | 0 | 1 | 0 | 0 | 1 | 0 | 0 | 0 | 4 |
| <u>UBE2F</u>     | 1 | 1 | 0 | 1 | 0 | 0 | 1 | 0 | 0 | 0 | 4 |
| <u>SMCR8</u>     | 0 | 1 | 0 | 1 | 0 | 0 | 1 | 0 | 0 | 1 | 4 |
| <u>C5orf20</u>   | 0 | 1 | 0 | 1 | 0 | 0 | 1 | 0 | 0 | 1 | 4 |
| <u>UBQLNL</u>    | 1 | 1 | 0 | 1 | 0 | 0 | 1 | 0 | 0 | 0 | 4 |
| <u>KDEL2</u>     | 1 | 1 | 0 | 1 | 0 | 0 | 1 | 0 | 0 | 0 | 4 |

|                  |   |   |   |   |   |   |   |   |   |   |   |
|------------------|---|---|---|---|---|---|---|---|---|---|---|
| <u>ALG10B</u>    | 0 | 1 | 0 | 1 | 0 | 0 | 1 | 0 | 0 | 1 | 4 |
| <u>ZNF664</u>    | 0 | 1 | 0 | 1 | 0 | 0 | 1 | 0 | 0 | 1 | 4 |
| <u>RDH12</u>     | 1 | 1 | 0 | 1 | 0 | 0 | 1 | 0 | 0 | 0 | 4 |
| <u>ZADH1</u>     | 1 | 0 | 0 | 1 | 0 | 0 | 1 | 0 | 0 | 1 | 4 |
| <u>C16orf71</u>  | 1 | 1 | 0 | 1 | 0 | 0 | 1 | 0 | 0 | 0 | 4 |
| <u>TOM1L2</u>    | 0 | 1 | 0 | 1 | 0 | 0 | 1 | 0 | 0 | 1 | 4 |
| <u>ZNRF4</u>     | 1 | 1 | 0 | 1 | 0 | 0 | 1 | 0 | 0 | 0 | 4 |
| <u>CTBS</u>      | 0 | 1 | 0 | 1 | 0 | 0 | 1 | 0 | 0 | 1 | 4 |
| <u>CTH</u>       | 1 | 1 | 0 | 1 | 0 | 0 | 1 | 0 | 0 | 0 | 4 |
| <u>FBXO41</u>    | 0 | 1 | 0 | 1 | 0 | 0 | 1 | 0 | 0 | 1 | 4 |
| <u>ARL6IP6</u>   | 1 | 1 | 0 | 1 | 0 | 0 | 1 | 0 | 0 | 0 | 4 |
| <u>SLC16A14</u>  | 1 | 1 | 0 | 1 | 0 | 0 | 1 | 0 | 0 | 0 | 4 |
| <u>GPR155</u>    | 1 | 0 | 0 | 1 | 0 | 0 | 1 | 0 | 0 | 1 | 4 |
| <u>GPR155</u>    | 1 | 1 | 0 | 1 | 0 | 0 | 0 | 0 | 0 | 1 | 4 |
| <u>TTC14</u>     | 1 | 1 | 0 | 1 | 0 | 0 | 0 | 0 | 0 | 1 | 4 |
| <u>RNF38</u>     | 1 | 1 | 0 | 1 | 0 | 0 | 0 | 0 | 0 | 1 | 4 |
| <u>IGSF11</u>    | 1 | 1 | 0 | 1 | 0 | 0 | 0 | 0 | 0 | 1 | 4 |
| <u>NFXL1</u>     | 1 | 1 | 0 | 1 | 0 | 0 | 1 | 0 | 0 | 0 | 4 |
| <u>CCDC112</u>   | 1 | 0 | 0 | 1 | 0 | 0 | 1 | 0 | 1 | 0 | 4 |
| <u>CYLD</u>      | 1 | 1 | 0 | 1 | 0 | 0 | 0 | 0 | 0 | 1 | 4 |
| <u>CYLD</u>      | 1 | 0 | 0 | 1 | 0 | 0 | 1 | 0 | 0 | 1 | 4 |
| <u>ZNF425</u>    | 1 | 1 | 0 | 1 | 0 | 0 | 1 | 0 | 0 | 0 | 4 |
| <u>RBM33</u>     | 1 | 1 | 0 | 1 | 0 | 0 | 0 | 0 | 0 | 1 | 4 |
| <u>VPS13B</u>    | 1 | 1 | 0 | 1 | 0 | 0 | 0 | 0 | 0 | 1 | 4 |
| <u>FAM91A1</u>   | 1 | 1 | 0 | 1 | 0 | 0 | 1 | 0 | 0 | 0 | 4 |
| <u>ZNF483</u>    | 1 | 1 | 0 | 1 | 0 | 0 | 0 | 0 | 0 | 1 | 4 |
| <u>PRUNE2</u>    | 1 | 1 | 0 | 1 | 0 | 0 | 0 | 0 | 0 | 1 | 4 |
| <u>CYP19A1</u>   | 1 | 1 | 0 | 1 | 0 | 0 | 0 | 0 | 0 | 1 | 4 |
| <u>CYP19A1</u>   | 1 | 0 | 0 | 1 | 0 | 0 | 1 | 0 | 0 | 1 | 4 |
| <u>DACH1</u>     | 1 | 1 | 0 | 1 | 0 | 0 | 1 | 0 | 0 | 0 | 4 |
| <u>DAD1</u>      | 1 | 1 | 0 | 1 | 0 | 0 | 1 | 0 | 0 | 0 | 4 |
| <u>CLEC12A</u>   | 0 | 1 | 0 | 1 | 0 | 0 | 1 | 0 | 0 | 1 | 4 |
| <u>DGKH</u>      | 1 | 1 | 0 | 1 | 0 | 0 | 0 | 0 | 0 | 1 | 4 |
| <u>LOC162073</u> | 0 | 1 | 0 | 1 | 0 | 0 | 1 | 0 | 0 | 1 | 4 |
| <u>C18orf54</u>  | 1 | 0 | 0 | 1 | 0 | 0 | 1 | 0 | 0 | 1 | 4 |
| <u>ZNF320</u>    | 0 | 1 | 0 | 1 | 0 | 0 | 1 | 0 | 0 | 1 | 4 |
| <u>DCN</u>       | 1 | 1 | 0 | 1 | 0 | 0 | 0 | 0 | 0 | 1 | 4 |
| <u>DCN</u>       | 1 | 1 | 0 | 1 | 0 | 0 | 0 | 0 | 0 | 1 | 4 |
| <u>SPATA5</u>    | 0 | 1 | 0 | 1 | 0 | 0 | 1 | 0 | 0 | 1 | 4 |
| <u>COL22A1</u>   | 1 | 1 | 0 | 1 | 0 | 0 | 1 | 0 | 0 | 0 | 4 |
| <u>SNX31</u>     | 1 | 1 | 0 | 1 | 0 | 0 | 1 | 0 | 0 | 0 | 4 |

|           |   |   |   |   |   |   |   |   |   |   |   |
|-----------|---|---|---|---|---|---|---|---|---|---|---|
| S100Z     | 0 | 1 | 0 | 1 | 0 | 0 | 1 | 0 | 0 | 1 | 4 |
| ADAMTS17  | 1 | 1 | 0 | 1 | 0 | 0 | 1 | 0 | 0 | 0 | 4 |
| SYNPO2    | 1 | 1 | 0 | 1 | 0 | 0 | 0 | 0 | 0 | 1 | 4 |
| SYNPO2    | 1 | 1 | 0 | 1 | 0 | 0 | 0 | 0 | 0 | 1 | 4 |
| DIO2      | 0 | 1 | 0 | 1 | 1 | 0 | 0 | 0 | 0 | 1 | 4 |
| DIO2      | 0 | 0 | 0 | 1 | 1 | 0 | 1 | 0 | 0 | 1 | 4 |
| ACAN      | 0 | 1 | 0 | 1 | 0 | 0 | 1 | 0 | 0 | 1 | 4 |
| AGL       | 1 | 0 | 0 | 1 | 0 | 0 | 1 | 0 | 0 | 1 | 4 |
| DRP2      | 0 | 1 | 0 | 1 | 0 | 0 | 1 | 0 | 0 | 1 | 4 |
| DSC1      | 1 | 1 | 0 | 1 | 0 | 0 | 0 | 0 | 0 | 1 | 4 |
| DSC3      | 1 | 1 | 0 | 1 | 0 | 0 | 0 | 0 | 0 | 1 | 4 |
| SLC26A2   | 1 | 1 | 0 | 1 | 0 | 0 | 1 | 0 | 0 | 0 | 4 |
| DTNA      | 1 | 1 | 0 | 1 | 0 | 0 | 0 | 0 | 0 | 1 | 4 |
| DTNA      | 1 | 0 | 0 | 1 | 1 | 0 | 0 | 0 | 0 | 1 | 4 |
| DTNA      | 1 | 0 | 0 | 1 | 0 | 0 | 1 | 0 | 0 | 1 | 4 |
| AGTR1     | 0 | 0 | 1 | 1 | 0 | 0 | 1 | 0 | 0 | 1 | 4 |
| AGXT      | 1 | 1 | 0 | 1 | 0 | 0 | 1 | 0 | 0 | 0 | 4 |
| EDA       | 1 | 1 | 0 | 1 | 0 | 0 | 1 | 0 | 0 | 0 | 4 |
| AHR       | 0 | 1 | 0 | 1 | 0 | 0 | 1 | 0 | 0 | 1 | 4 |
| EIF1AX    | 0 | 1 | 0 | 1 | 0 | 0 | 1 | 0 | 0 | 1 | 4 |
| LOC196415 | 0 | 1 | 0 | 1 | 0 | 0 | 1 | 0 | 0 | 1 | 4 |
| C12orf12  | 0 | 1 | 0 | 1 | 0 | 0 | 1 | 0 | 0 | 1 | 4 |
| GRAMD2    | 1 | 1 | 0 | 1 | 0 | 0 | 1 | 0 | 0 | 0 | 4 |
| ACSF3     | 1 | 0 | 0 | 1 | 0 | 0 | 1 | 0 | 0 | 1 | 4 |
| EIF4EBP2  | 1 | 1 | 0 | 1 | 0 | 0 | 1 | 0 | 0 | 0 | 4 |
| DZIP1L    | 1 | 1 | 0 | 1 | 0 | 0 | 1 | 0 | 0 | 0 | 4 |
| C1orf69   | 1 | 1 | 0 | 1 | 0 | 0 | 1 | 0 | 0 | 0 | 4 |
| TAPT1     | 0 | 1 | 0 | 1 | 0 | 0 | 1 | 0 | 0 | 1 | 4 |
| TUBB      | 1 | 1 | 0 | 1 | 0 | 0 | 0 | 0 | 0 | 1 | 4 |
| EPB41     | 1 | 0 | 0 | 1 | 0 | 0 | 1 | 0 | 0 | 1 | 4 |
| EPB41     | 1 | 1 | 0 | 1 | 0 | 0 | 0 | 0 | 0 | 1 | 4 |
| DDX26B    | 1 | 1 | 0 | 1 | 0 | 0 | 1 | 0 | 0 | 0 | 4 |
| STX2      | 1 | 1 | 0 | 1 | 0 | 0 | 0 | 0 | 0 | 1 | 4 |
| EYA4      | 1 | 0 | 0 | 1 | 1 | 0 | 0 | 0 | 0 | 1 | 4 |
| ERG       | 1 | 0 | 0 | 1 | 0 | 0 | 1 | 0 | 0 | 1 | 4 |
| ERG       | 1 | 1 | 0 | 1 | 0 | 0 | 0 | 0 | 0 | 1 | 4 |
| ESR1      | 1 | 1 | 0 | 1 | 0 | 0 | 0 | 0 | 0 | 1 | 4 |
| ESR1      | 1 | 0 | 1 | 1 | 0 | 0 | 0 | 0 | 0 | 1 | 4 |
| EVI2A     | 1 | 1 | 0 | 1 | 0 | 0 | 0 | 0 | 0 | 1 | 4 |
| EXT2      | 0 | 0 | 0 | 1 | 0 | 0 | 1 | 0 | 1 | 1 | 4 |
| EXT2      | 1 | 1 | 0 | 1 | 0 | 0 | 0 | 0 | 0 | 1 | 4 |

|                 |   |   |   |   |   |   |   |   |   |   |   |
|-----------------|---|---|---|---|---|---|---|---|---|---|---|
| <u>TY SND1</u>  | 1 | 1 | 0 | 1 | 0 | 0 | 1 | 0 | 0 | 0 | 4 |
| <u>SLC39A12</u> | 1 | 0 | 0 | 1 | 1 | 0 | 1 | 0 | 0 | 0 | 4 |
| <u>FKTN</u>     | 0 | 0 | 0 | 1 | 0 | 0 | 1 | 1 | 0 | 1 | 4 |
| <u>FKTN</u>     | 1 | 1 | 0 | 1 | 0 | 0 | 0 | 0 | 0 | 1 | 4 |
| <u>ATXN7L1</u>  | 1 | 1 | 0 | 1 | 0 | 0 | 0 | 1 | 0 | 0 | 4 |
| <u>GPC5</u>     | 0 | 1 | 0 | 1 | 0 | 0 | 1 | 0 | 0 | 1 | 4 |
| <u>FKBP1A</u>   | 1 | 1 | 0 | 1 | 0 | 0 | 0 | 0 | 0 | 1 | 4 |
| <u>ZNF652</u>   | 0 | 1 | 0 | 1 | 0 | 0 | 1 | 0 | 0 | 1 | 4 |
| <u>FNDC3A</u>   | 1 | 0 | 0 | 1 | 1 | 0 | 0 | 0 | 0 | 1 | 4 |
| <u>KIN</u>      | 1 | 1 | 0 | 1 | 0 | 0 | 1 | 0 | 0 | 0 | 4 |
| <u>PCNX</u>     | 0 | 1 | 0 | 1 | 0 | 0 | 1 | 0 | 0 | 1 | 4 |
| <u>LIMCH1</u>   | 0 | 1 | 0 | 1 | 0 | 0 | 1 | 0 | 0 | 1 | 4 |
| <u>RAB21</u>    | 1 | 1 | 0 | 1 | 0 | 0 | 1 | 0 | 0 | 0 | 4 |
| <u>FNBP1</u>    | 1 | 1 | 0 | 1 | 0 | 0 | 1 | 0 | 0 | 0 | 4 |
| <u>KIF1B</u>    | 1 | 1 | 0 | 1 | 0 | 0 | 1 | 0 | 0 | 0 | 4 |
| <u>TBC1D2B</u>  | 1 | 1 | 0 | 1 | 0 | 0 | 0 | 0 | 0 | 1 | 4 |
| <u>TBC1D2B</u>  | 1 | 1 | 0 | 1 | 0 | 0 | 0 | 0 | 0 | 1 | 4 |
| <u>GARNL4</u>   | 0 | 1 | 0 | 1 | 0 | 0 | 1 | 0 | 0 | 1 | 4 |
| <u>SEPT6</u>    | 1 | 1 | 0 | 1 | 0 | 0 | 1 | 0 | 0 | 0 | 4 |
| <u>SEPT7</u>    | 1 | 1 | 0 | 1 | 0 | 0 | 0 | 0 | 0 | 1 | 4 |
| <u>CEP68</u>    | 1 | 1 | 0 | 1 | 0 | 0 | 1 | 0 | 0 | 0 | 4 |
| <u>RGL1</u>     | 1 | 1 | 0 | 1 | 0 | 0 | 1 | 0 | 0 | 0 | 4 |
| <u>JMJD6</u>    | 0 | 1 | 0 | 1 | 0 | 0 | 1 | 0 | 0 | 1 | 4 |
| <u>VPS13A</u>   | 1 | 1 | 0 | 1 | 0 | 0 | 0 | 0 | 0 | 1 | 4 |
| <u>ANKRD28</u>  | 1 | 1 | 0 | 1 | 0 | 0 | 1 | 0 | 0 | 0 | 4 |
| <u>ATP11A</u>   | 1 | 1 | 0 | 1 | 0 | 0 | 0 | 0 | 0 | 1 | 4 |
| <u>IQCE</u>     | 0 | 1 | 0 | 1 | 0 | 0 | 1 | 0 | 0 | 1 | 4 |
| <u>TMEM194</u>  | 1 | 1 | 0 | 1 | 0 | 0 | 0 | 0 | 0 | 1 | 4 |
| <u>KIAA0467</u> | 0 | 1 | 0 | 1 | 0 | 0 | 1 | 0 | 0 | 1 | 4 |
| <u>SYNE1</u>    | 0 | 0 | 0 | 1 | 1 | 1 | 0 | 0 | 0 | 1 | 4 |
| <u>SYNE1</u>    | 0 | 0 | 0 | 1 | 1 | 1 | 0 | 0 | 0 | 1 | 4 |
| <u>SYNE1</u>    | 0 | 0 | 0 | 1 | 1 | 1 | 0 | 0 | 0 | 1 | 4 |
| <u>KIAA0895</u> | 1 | 1 | 0 | 1 | 0 | 0 | 0 | 0 | 0 | 1 | 4 |
| <u>KIAA0895</u> | 1 | 0 | 0 | 1 | 0 | 0 | 1 | 0 | 0 | 1 | 4 |
| <u>RHOQ</u>     | 1 | 1 | 0 | 1 | 0 | 0 | 1 | 0 | 0 | 0 | 4 |
| <u>HEY1</u>     | 1 | 0 | 0 | 1 | 0 | 0 | 1 | 0 | 0 | 1 | 4 |
| <u>HEY1</u>     | 1 | 1 | 0 | 1 | 0 | 0 | 0 | 0 | 0 | 1 | 4 |
| <u>KIAA0240</u> | 1 | 1 | 0 | 1 | 0 | 0 | 1 | 0 | 0 | 0 | 4 |
| <u>DDAH1</u>    | 1 | 1 | 0 | 1 | 0 | 0 | 0 | 0 | 0 | 1 | 4 |
| <u>FPRL1</u>    | 1 | 1 | 0 | 1 | 0 | 0 | 0 | 0 | 0 | 1 | 4 |
| <u>FPRL1</u>    | 0 | 0 | 0 | 1 | 0 | 0 | 1 | 1 | 0 | 1 | 4 |

|                |   |   |   |   |   |   |   |   |   |   |   |
|----------------|---|---|---|---|---|---|---|---|---|---|---|
| <u>RUSC1</u>   | 0 | 1 | 0 | 1 | 0 | 0 | 1 | 0 | 0 | 1 | 4 |
| <u>KPNA6</u>   | 1 | 1 | 0 | 1 | 0 | 0 | 1 | 0 | 0 | 0 | 4 |
| <u>PRKD3</u>   | 1 | 1 | 0 | 1 | 0 | 0 | 1 | 0 | 0 | 0 | 4 |
| <u>EID1</u>    | 0 | 1 | 0 | 1 | 0 | 0 | 1 | 0 | 0 | 1 | 4 |
| <u>BHMT2</u>   | 1 | 1 | 0 | 1 | 0 | 0 | 1 | 0 | 0 | 0 | 4 |
| <u>IFIT5</u>   | 1 | 1 | 0 | 1 | 0 | 0 | 1 | 0 | 0 | 0 | 4 |
| <u>STAC3</u>   | 1 | 1 | 0 | 1 | 0 | 0 | 1 | 0 | 0 | 0 | 4 |
| <u>FUT5</u>    | 0 | 1 | 0 | 1 | 0 | 0 | 1 | 0 | 0 | 1 | 4 |
| <u>TMEM9</u>   | 1 | 1 | 0 | 1 | 0 | 0 | 1 | 0 | 0 | 0 | 4 |
| <u>GABRA1</u>  | 1 | 0 | 1 | 1 | 0 | 0 | 0 | 0 | 0 | 1 | 4 |
| <u>GABRA1</u>  | 1 | 1 | 0 | 1 | 0 | 0 | 0 | 0 | 0 | 1 | 4 |
| <u>BCL6B</u>   | 0 | 1 | 0 | 1 | 0 | 0 | 1 | 0 | 0 | 1 | 4 |
| <u>CCRN4L</u>  | 1 | 1 | 0 | 1 | 0 | 0 | 1 | 0 | 0 | 0 | 4 |
| <u>PRDX5</u>   | 1 | 1 | 0 | 1 | 0 | 0 | 1 | 0 | 0 | 0 | 4 |
| <u>NIPBL</u>   | 1 | 1 | 0 | 1 | 0 | 0 | 0 | 0 | 0 | 1 | 4 |
| <u>ZNF345</u>  | 0 | 1 | 0 | 1 | 0 | 0 | 1 | 0 | 0 | 1 | 4 |
| <u>FAM119B</u> | 1 | 1 | 0 | 1 | 0 | 0 | 0 | 0 | 0 | 1 | 4 |
| <u>RNF19A</u>  | 1 | 0 | 0 | 1 | 0 | 0 | 1 | 0 | 0 | 1 | 4 |
| <u>RCHY1</u>   | 1 | 1 | 0 | 1 | 0 | 0 | 1 | 0 | 0 | 0 | 4 |
| <u>HSPA12A</u> | 1 | 1 | 0 | 1 | 0 | 0 | 1 | 0 | 0 | 0 | 4 |
| <u>MYRIP</u>   | 1 | 1 | 0 | 1 | 0 | 0 | 1 | 0 | 0 | 0 | 4 |
| <u>NSL1</u>    | 1 | 1 | 0 | 1 | 0 | 0 | 0 | 0 | 0 | 1 | 4 |
| <u>L3MBTL</u>  | 1 | 1 | 0 | 1 | 0 | 0 | 0 | 0 | 0 | 1 | 4 |
| <u>L3MBTL</u>  | 1 | 0 | 0 | 1 | 0 | 0 | 1 | 0 | 0 | 1 | 4 |
| <u>PIP3-E</u>  | 1 | 1 | 0 | 1 | 0 | 0 | 0 | 0 | 0 | 1 | 4 |
| <u>CHD5</u>    | 1 | 1 | 0 | 1 | 0 | 0 | 1 | 0 | 0 | 0 | 4 |
| <u>MAGI3</u>   | 1 | 0 | 0 | 1 | 0 | 0 | 1 | 0 | 0 | 1 | 4 |
| <u>DNM3</u>    | 0 | 1 | 0 | 1 | 0 | 0 | 1 | 0 | 0 | 1 | 4 |
| <u>HERC4</u>   | 1 | 1 | 0 | 1 | 0 | 0 | 1 | 0 | 0 | 0 | 4 |
| <u>WSB1</u>    | 1 | 0 | 0 | 1 | 1 | 0 | 0 | 0 | 0 | 1 | 4 |
| <u>TTLL3</u>   | 1 | 1 | 0 | 1 | 0 | 0 | 0 | 0 | 0 | 1 | 4 |
| <u>RSL1D1</u>  | 1 | 1 | 0 | 1 | 0 | 0 | 1 | 0 | 0 | 0 | 4 |
| <u>ARL5A</u>   | 1 | 0 | 0 | 1 | 1 | 0 | 0 | 0 | 0 | 1 | 4 |
| <u>GBP1</u>    | 1 | 1 | 0 | 1 | 0 | 0 | 1 | 0 | 0 | 0 | 4 |
| <u>LHX6</u>    | 1 | 1 | 0 | 1 | 0 | 0 | 0 | 0 | 0 | 1 | 4 |
| <u>GCNT2</u>   | 1 | 0 | 0 | 1 | 0 | 0 | 1 | 0 | 0 | 1 | 4 |
| <u>GCNT2</u>   | 1 | 1 | 0 | 1 | 0 | 0 | 0 | 0 | 0 | 1 | 4 |
| <u>AMFR</u>    | 1 | 1 | 0 | 1 | 0 | 0 | 1 | 0 | 0 | 0 | 4 |
| <u>GFRA1</u>   | 0 | 1 | 0 | 1 | 0 | 0 | 1 | 0 | 0 | 1 | 4 |
| <u>HTF9C</u>   | 1 | 1 | 0 | 1 | 0 | 0 | 1 | 0 | 0 | 0 | 4 |
| <u>D4S234E</u> | 1 | 1 | 0 | 1 | 0 | 0 | 0 | 0 | 0 | 1 | 4 |

|           |   |   |   |   |   |   |   |   |   |   |   |
|-----------|---|---|---|---|---|---|---|---|---|---|---|
| D4S234E   | 1 | 0 | 0 | 1 | 0 | 0 | 1 | 0 | 0 | 1 | 4 |
| DAPP1     | 1 | 1 | 0 | 1 | 0 | 0 | 1 | 0 | 0 | 0 | 4 |
| GK        | 1 | 1 | 0 | 1 | 0 | 0 | 0 | 0 | 0 | 1 | 4 |
| INVS      | 1 | 1 | 0 | 1 | 0 | 0 | 1 | 0 | 0 | 0 | 4 |
| SNX5      | 1 | 1 | 0 | 1 | 0 | 0 | 0 | 0 | 0 | 1 | 4 |
| ASAH1     | 1 | 1 | 0 | 1 | 0 | 0 | 0 | 0 | 0 | 1 | 4 |
| DISC1     | 1 | 1 | 0 | 1 | 0 | 0 | 0 | 0 | 0 | 1 | 4 |
| SERP1     | 1 | 1 | 0 | 1 | 0 | 0 | 1 | 0 | 0 | 0 | 4 |
| GLRX      | 1 | 1 | 0 | 1 | 0 | 0 | 0 | 0 | 0 | 1 | 4 |
| GPD2      | 1 | 1 | 0 | 1 | 0 | 0 | 0 | 0 | 0 | 1 | 4 |
| GPM6A     | 1 | 1 | 0 | 1 | 0 | 0 | 0 | 0 | 0 | 1 | 4 |
| GPM6A     | 1 | 0 | 0 | 1 | 0 | 0 | 1 | 0 | 0 | 1 | 4 |
| GPR3      | 1 | 1 | 0 | 1 | 0 | 0 | 1 | 0 | 0 | 0 | 4 |
| BLOC1S2   | 1 | 0 | 0 | 1 | 0 | 0 | 1 | 0 | 0 | 1 | 4 |
| BLOC1S2   | 1 | 1 | 0 | 1 | 0 | 0 | 0 | 0 | 0 | 1 | 4 |
| C11orf47  | 1 | 0 | 0 | 1 | 0 | 0 | 1 | 0 | 0 | 1 | 4 |
| KSR2      | 0 | 1 | 0 | 1 | 0 | 0 | 1 | 0 | 0 | 1 | 4 |
| GLT8D3    | 0 | 1 | 0 | 1 | 0 | 0 | 1 | 0 | 0 | 1 | 4 |
| LOC283514 | 1 | 1 | 0 | 1 | 0 | 0 | 1 | 0 | 0 | 0 | 4 |
| FLJ39743  | 0 | 1 | 0 | 1 | 0 | 0 | 1 | 0 | 0 | 1 | 4 |
| FLJ35220  | 0 | 1 | 0 | 1 | 0 | 0 | 1 | 0 | 0 | 1 | 4 |
| ZNF326    | 1 | 1 | 0 | 1 | 0 | 0 | 0 | 0 | 0 | 1 | 4 |
| FAM80A    | 0 | 1 | 1 | 1 | 0 | 0 | 0 | 0 | 0 | 1 | 4 |
| NKIRAS1   | 1 | 1 | 0 | 1 | 0 | 0 | 1 | 0 | 0 | 0 | 4 |
| DPY19L4   | 1 | 1 | 0 | 1 | 0 | 0 | 1 | 0 | 0 | 0 | 4 |
| C9orf47   | 1 | 0 | 0 | 1 | 0 | 0 | 1 | 0 | 0 | 1 | 4 |
| ATP11C    | 1 | 1 | 0 | 1 | 0 | 0 | 0 | 0 | 0 | 1 | 4 |
| GRB10     | 1 | 1 | 0 | 1 | 0 | 0 | 0 | 0 | 0 | 1 | 4 |
| MRPS18B   | 1 | 1 | 0 | 1 | 0 | 0 | 0 | 0 | 0 | 1 | 4 |
| MRPL42    | 1 | 1 | 0 | 1 | 0 | 0 | 1 | 0 | 0 | 0 | 4 |
| NR3C1     | 1 | 1 | 0 | 1 | 0 | 0 | 0 | 0 | 0 | 1 | 4 |
| NR3C1     | 1 | 1 | 0 | 1 | 0 | 0 | 0 | 0 | 0 | 1 | 4 |
| GRLF1     | 0 | 1 | 0 | 1 | 0 | 0 | 1 | 0 | 0 | 1 | 4 |
| GRM1      | 1 | 1 | 0 | 1 | 0 | 0 | 0 | 0 | 0 | 1 | 4 |
| GRM1      | 1 | 1 | 0 | 1 | 0 | 0 | 0 | 0 | 0 | 1 | 4 |
| GRM8      | 0 | 1 | 0 | 1 | 1 | 1 | 0 | 0 | 0 | 0 | 4 |
| GSK3B     | 0 | 1 | 0 | 1 | 0 | 0 | 1 | 0 | 1 | 0 | 4 |
| TMOD3     | 1 | 1 | 0 | 1 | 0 | 0 | 1 | 0 | 0 | 0 | 4 |
| HIG2      | 1 | 1 | 0 | 1 | 0 | 0 | 0 | 0 | 0 | 1 | 4 |
| HIG2      | 1 | 0 | 0 | 1 | 0 | 0 | 1 | 0 | 0 | 1 | 4 |
| DSE       | 1 | 1 | 0 | 1 | 0 | 0 | 0 | 0 | 0 | 1 | 4 |

|                 |   |   |   |   |   |   |   |   |   |   |   |
|-----------------|---|---|---|---|---|---|---|---|---|---|---|
| <u>DSE</u>      | 1 | 0 | 0 | 1 | 0 | 0 | 1 | 0 | 0 | 1 | 4 |
| <u>PADI1</u>    | 1 | 1 | 0 | 1 | 0 | 0 | 1 | 0 | 0 | 0 | 4 |
| <u>MDFIC</u>    | 1 | 1 | 0 | 1 | 0 | 0 | 1 | 0 | 0 | 0 | 4 |
| <u>NXPH1</u>    | 1 | 1 | 0 | 1 | 0 | 0 | 1 | 0 | 0 | 0 | 4 |
| <u>EMR2</u>     | 1 | 0 | 0 | 1 | 0 | 0 | 1 | 0 | 0 | 1 | 4 |
| <u>EMR2</u>     | 1 | 1 | 0 | 1 | 0 | 0 | 0 | 0 | 0 | 1 | 4 |
| <u>CDR2L</u>    | 1 | 1 | 0 | 1 | 0 | 0 | 1 | 0 | 0 | 0 | 4 |
| <u>UBE2K</u>    | 0 | 1 | 0 | 1 | 0 | 0 | 1 | 0 | 0 | 1 | 4 |
| <u>HLA-B</u>    | 0 | 1 | 0 | 1 | 0 | 0 | 1 | 0 | 0 | 1 | 4 |
| <u>ANXA11</u>   | 1 | 1 | 0 | 1 | 0 | 0 | 0 | 0 | 0 | 1 | 4 |
| <u>ANXA11</u>   | 1 | 0 | 0 | 1 | 0 | 0 | 1 | 0 | 0 | 1 | 4 |
| <u>HMGB2</u>    | 1 | 1 | 0 | 1 | 0 | 0 | 0 | 0 | 0 | 1 | 4 |
| <u>HMGCS1</u>   | 1 | 0 | 0 | 1 | 0 | 0 | 1 | 0 | 0 | 1 | 4 |
| <u>HNRNPC</u>   | 1 | 1 | 0 | 1 | 0 | 0 | 0 | 0 | 0 | 1 | 4 |
| <u>HOXA1</u>    | 1 | 1 | 0 | 1 | 0 | 0 | 0 | 0 | 0 | 1 | 4 |
| <u>HOXA3</u>    | 1 | 0 | 0 | 1 | 0 | 0 | 1 | 0 | 0 | 1 | 4 |
| <u>HOXA7</u>    | 1 | 1 | 0 | 1 | 0 | 0 | 1 | 0 | 0 | 0 | 4 |
| <u>HRH1</u>     | 1 | 1 | 0 | 1 | 0 | 0 | 0 | 0 | 0 | 1 | 4 |
| <u>BIRC5</u>    | 1 | 1 | 0 | 1 | 0 | 0 | 0 | 0 | 0 | 1 | 4 |
| <u>UBAC2</u>    | 1 | 0 | 0 | 1 | 0 | 0 | 1 | 0 | 0 | 1 | 4 |
| <u>C17orf51</u> | 0 | 1 | 1 | 1 | 0 | 0 | 0 | 0 | 0 | 1 | 4 |
| <u>ICT1</u>     | 1 | 1 | 0 | 1 | 0 | 0 | 1 | 0 | 0 | 0 | 4 |
| <u>C3orf35</u>  | 0 | 1 | 0 | 1 | 0 | 0 | 1 | 0 | 0 | 1 | 4 |
| <u>ZDHHC21</u>  | 1 | 1 | 0 | 1 | 0 | 0 | 1 | 0 | 0 | 0 | 4 |
| <u>C11orf53</u> | 1 | 1 | 0 | 1 | 0 | 0 | 1 | 0 | 0 | 0 | 4 |
| <u>STAC2</u>    | 1 | 1 | 0 | 1 | 0 | 0 | 1 | 0 | 0 | 0 | 4 |
| <u>SH3MD4</u>   | 0 | 1 | 0 | 1 | 0 | 0 | 1 | 0 | 0 | 1 | 4 |
| <u>IGF1</u>     | 1 | 1 | 0 | 1 | 0 | 0 | 0 | 0 | 0 | 1 | 4 |
| <u>IGF1</u>     | 1 | 1 | 0 | 1 | 0 | 0 | 0 | 0 | 0 | 1 | 4 |
| <u>FAM33A</u>   | 1 | 1 | 0 | 1 | 0 | 0 | 0 | 0 | 0 | 1 | 4 |
| <u>SLCO4C1</u>  | 1 | 1 | 0 | 1 | 0 | 0 | 1 | 0 | 0 | 0 | 4 |
| <u>TICAM2</u>   | 0 | 1 | 0 | 1 | 0 | 0 | 1 | 0 | 0 | 1 | 4 |
| <u>FAS</u>      | 1 | 1 | 0 | 1 | 0 | 0 | 0 | 0 | 0 | 1 | 4 |
| <u>IL1RAP</u>   | 1 | 1 | 0 | 1 | 0 | 0 | 0 | 0 | 0 | 1 | 4 |
| <u>IL10</u>     | 1 | 1 | 0 | 1 | 0 | 0 | 1 | 0 | 0 | 0 | 4 |
| <u>IL12B</u>    | 1 | 1 | 0 | 1 | 0 | 0 | 1 | 0 | 0 | 0 | 4 |
| <u>IL13RA2</u>  | 1 | 1 | 0 | 1 | 0 | 0 | 1 | 0 | 0 | 0 | 4 |
| <u>ITGA6</u>    | 1 | 0 | 0 | 1 | 0 | 0 | 1 | 0 | 0 | 1 | 4 |
| <u>ITGA6</u>    | 1 | 1 | 0 | 1 | 0 | 0 | 0 | 0 | 0 | 1 | 4 |
| <u>TRIM23</u>   | 1 | 1 | 0 | 1 | 0 | 0 | 1 | 0 | 0 | 0 | 4 |
| <u>C7orf52</u>  | 1 | 1 | 0 | 1 | 0 | 0 | 1 | 0 | 0 | 0 | 4 |



|                     |   |   |   |   |   |   |   |   |   |   |   |
|---------------------|---|---|---|---|---|---|---|---|---|---|---|
| <u>KCNJ1</u>        | 1 | 1 | 0 | 1 | 0 | 0 | 0 | 0 | 0 | 1 | 4 |
| <u>KCNJ1</u>        | 1 | 0 | 0 | 1 | 0 | 0 | 1 | 0 | 0 | 1 | 4 |
| <u>TNPO1</u>        | 1 | 1 | 0 | 1 | 0 | 0 | 0 | 0 | 0 | 1 | 4 |
| <u>KRT82</u>        | 1 | 1 | 0 | 1 | 0 | 0 | 1 | 0 | 0 | 0 | 4 |
| <u>LOC389073</u>    | 1 | 1 | 0 | 1 | 0 | 0 | 1 | 0 | 0 | 0 | 4 |
| <u>LAMA3</u>        | 1 | 1 | 0 | 1 | 0 | 0 | 1 | 0 | 0 | 0 | 4 |
| <u>NUDT19</u>       | 0 | 1 | 0 | 1 | 0 | 0 | 1 | 0 | 0 | 1 | 4 |
| <u>TRIM61</u>       | 1 | 1 | 0 | 1 | 0 | 0 | 1 | 0 | 0 | 0 | 4 |
| <u>LBR</u>          | 1 | 0 | 0 | 1 | 1 | 0 | 0 | 0 | 0 | 1 | 4 |
| <u>LCP1</u>         | 1 | 1 | 0 | 1 | 0 | 0 | 1 | 0 | 0 | 0 | 4 |
| <u>LEP</u>          | 1 | 1 | 0 | 1 | 0 | 0 | 1 | 0 | 0 | 0 | 4 |
| <u>LIFR</u>         | 1 | 0 | 1 | 1 | 0 | 0 | 0 | 0 | 0 | 1 | 4 |
| <u>LIFR</u>         | 1 | 1 | 0 | 1 | 0 | 0 | 0 | 0 | 0 | 1 | 4 |
| <u>LIG4</u>         | 1 | 0 | 0 | 1 | 0 | 0 | 1 | 0 | 0 | 1 | 4 |
| <u>ABLIM1</u>       | 1 | 0 | 0 | 1 | 0 | 0 | 1 | 0 | 0 | 1 | 4 |
| <u>ABLIM1</u>       | 1 | 1 | 0 | 1 | 0 | 0 | 0 | 0 | 0 | 1 | 4 |
| <u>METTL10</u>      | 1 | 1 | 0 | 1 | 0 | 0 | 1 | 0 | 0 | 0 | 4 |
| <u>FLJ45803</u>     | 0 | 1 | 0 | 1 | 0 | 0 | 1 | 1 | 0 | 0 | 4 |
| <u>RP5-1103G7.6</u> | 1 | 1 | 0 | 1 | 0 | 0 | 1 | 0 | 0 | 0 | 4 |
| <u>C8orf59</u>      | 0 | 0 | 1 | 1 | 0 | 0 | 1 | 0 | 0 | 1 | 4 |
| <u>SAMD12</u>       | 1 | 1 | 0 | 1 | 0 | 0 | 0 | 0 | 0 | 1 | 4 |
| <u>LRP6</u>         | 0 | 1 | 0 | 1 | 0 | 0 | 1 | 0 | 0 | 1 | 4 |
| <u>TM4SF1</u>       | 1 | 1 | 0 | 1 | 0 | 0 | 1 | 0 | 0 | 0 | 4 |
| <u>CAPRIN1</u>      | 1 | 1 | 0 | 1 | 0 | 0 | 0 | 0 | 0 | 1 | 4 |
| <u>MAGEA4</u>       | 1 | 1 | 0 | 1 | 0 | 0 | 0 | 0 | 0 | 1 | 4 |
| <u>MAP6</u>         | 0 | 1 | 0 | 1 | 0 | 0 | 1 | 0 | 0 | 1 | 4 |
| <u>MAPT</u>         | 1 | 1 | 0 | 1 | 0 | 0 | 0 | 0 | 0 | 1 | 4 |
| <u>MBNL1</u>        | 1 | 1 | 0 | 1 | 0 | 0 | 0 | 0 | 0 | 1 | 4 |
| <u>MBP</u>          | 1 | 1 | 0 | 1 | 0 | 0 | 0 | 0 | 0 | 1 | 4 |
| <u>CD46</u>         | 1 | 0 | 0 | 1 | 0 | 0 | 1 | 0 | 0 | 1 | 4 |
| <u>CD46</u>         | 1 | 1 | 0 | 1 | 0 | 0 | 0 | 0 | 0 | 1 | 4 |
| <u>MEF2A</u>        | 1 | 1 | 0 | 1 | 0 | 0 | 1 | 0 | 0 | 0 | 4 |
| <u>MEIS2</u>        | 1 | 0 | 0 | 1 | 1 | 1 | 0 | 0 | 0 | 0 | 4 |
| <u>MEIS2</u>        | 1 | 0 | 0 | 1 | 1 | 1 | 0 | 0 | 0 | 0 | 4 |
| <u>MEIS2</u>        | 1 | 0 | 0 | 1 | 1 | 1 | 0 | 0 | 0 | 0 | 4 |
| <u>MEIS2</u>        | 1 | 0 | 0 | 1 | 1 | 1 | 0 | 0 | 0 | 0 | 4 |
| <u>MGAT3</u>        | 1 | 0 | 0 | 1 | 0 | 0 | 1 | 0 | 0 | 1 | 4 |
| <u>MKI67</u>        | 1 | 1 | 0 | 1 | 0 | 0 | 1 | 0 | 0 | 0 | 4 |
| <u>MLF1</u>         | 1 | 1 | 0 | 1 | 0 | 0 | 0 | 0 | 0 | 1 | 4 |
| <u>MME</u>          | 0 | 0 | 1 | 1 | 0 | 0 | 1 | 0 | 0 | 1 | 4 |
| <u>MOBP</u>         | 1 | 1 | 0 | 1 | 0 | 0 | 1 | 0 | 0 | 0 | 4 |

|                 |   |   |   |   |   |   |   |   |   |   |   |
|-----------------|---|---|---|---|---|---|---|---|---|---|---|
| <u>MOCS2</u>    | 1 | 1 | 0 | 1 | 0 | 0 | 1 | 0 | 0 | 0 | 4 |
| <u>MOG</u>      | 1 | 1 | 0 | 1 | 0 | 0 | 0 | 0 | 0 | 1 | 4 |
| <u>MOG</u>      | 1 | 1 | 0 | 1 | 0 | 0 | 0 | 0 | 0 | 1 | 4 |
| <u>MOG</u>      | 1 | 1 | 0 | 1 | 0 | 0 | 0 | 0 | 0 | 1 | 4 |
| <u>MOG</u>      | 1 | 1 | 0 | 1 | 0 | 0 | 0 | 0 | 0 | 1 | 4 |
| <u>MOG</u>      | 1 | 1 | 0 | 1 | 0 | 0 | 0 | 0 | 0 | 1 | 4 |
| <u>EIF2AK4</u>  | 1 | 1 | 0 | 1 | 0 | 0 | 1 | 0 | 0 | 0 | 4 |
| <u>UNC13C</u>   | 1 | 1 | 0 | 1 | 0 | 0 | 1 | 0 | 0 | 0 | 4 |
| <u>MTHFR</u>    | 1 | 1 | 0 | 1 | 0 | 0 | 1 | 0 | 0 | 0 | 4 |
| <u>MTM1</u>     | 1 | 1 | 0 | 1 | 0 | 0 | 1 | 0 | 0 | 0 | 4 |
| <u>MUT</u>      | 1 | 1 | 0 | 1 | 0 | 0 | 1 | 0 | 0 | 0 | 4 |
| <u>MYBL1</u>    | 0 | 1 | 0 | 1 | 0 | 0 | 1 | 0 | 0 | 1 | 4 |
| <u>MYBPC1</u>   | 0 | 1 | 0 | 1 | 1 | 1 | 0 | 0 | 0 | 0 | 4 |
| <u>MYL1</u>     | 1 | 1 | 0 | 1 | 0 | 0 | 1 | 0 | 0 | 0 | 4 |
| <u>MYO7B</u>    | 1 | 1 | 0 | 1 | 0 | 0 | 1 | 0 | 0 | 0 | 4 |
| <u>MYO9B</u>    | 1 | 1 | 0 | 1 | 0 | 0 | 0 | 0 | 0 | 1 | 4 |
| <u>MYO9B</u>    | 1 | 1 | 0 | 1 | 0 | 0 | 0 | 0 | 0 | 1 | 4 |
| <u>MYO10</u>    | 0 | 1 | 0 | 1 | 0 | 0 | 1 | 0 | 0 | 1 | 4 |
| <u>PPP1R12B</u> | 1 | 0 | 0 | 1 | 1 | 0 | 0 | 0 | 0 | 1 | 4 |
| <u>NAP1L2</u>   | 1 | 1 | 0 | 1 | 0 | 0 | 1 | 0 | 0 | 0 | 4 |
| <u>NBN</u>      | 1 | 1 | 0 | 1 | 0 | 0 | 0 | 0 | 0 | 1 | 4 |
| <u>NCL</u>      | 1 | 1 | 0 | 1 | 0 | 0 | 1 | 0 | 0 | 0 | 4 |
| <u>NDUFB1</u>   | 0 | 1 | 0 | 1 | 1 | 0 | 1 | 0 | 0 | 0 | 4 |
| <u>RERE</u>     | 1 | 1 | 0 | 1 | 0 | 0 | 0 | 0 | 0 | 1 | 4 |
| <u>RERE</u>     | 1 | 0 | 0 | 1 | 0 | 0 | 1 | 0 | 0 | 1 | 4 |
| <u>SEPT2</u>    | 1 | 0 | 0 | 1 | 0 | 0 | 1 | 0 | 0 | 1 | 4 |
| <u>SEPT2</u>    | 1 | 1 | 0 | 1 | 0 | 0 | 0 | 0 | 0 | 1 | 4 |
| <u>NEO1</u>     | 0 | 1 | 0 | 1 | 0 | 0 | 1 | 0 | 0 | 1 | 4 |
| <u>NFATC4</u>   | 1 | 0 | 0 | 1 | 0 | 0 | 1 | 0 | 0 | 1 | 4 |
| <u>NOS1</u>     | 1 | 1 | 0 | 1 | 0 | 0 | 1 | 0 | 0 | 0 | 4 |
| <u>NOS3</u>     | 1 | 1 | 0 | 1 | 0 | 0 | 1 | 0 | 0 | 0 | 4 |
| <u>CNOT4</u>    | 0 | 1 | 0 | 1 | 0 | 0 | 1 | 0 | 0 | 1 | 4 |
| <u>NOVA1</u>    | 0 | 0 | 0 | 1 | 1 | 1 | 0 | 0 | 0 | 1 | 4 |
| <u>ROR2</u>     | 1 | 1 | 0 | 1 | 0 | 0 | 1 | 0 | 0 | 0 | 4 |
| <u>OCA2</u>     | 1 | 1 | 0 | 1 | 0 | 0 | 1 | 0 | 0 | 0 | 4 |
| <u>OGN</u>      | 1 | 1 | 0 | 1 | 0 | 0 | 0 | 0 | 0 | 1 | 4 |
| <u>OGN</u>      | 1 | 0 | 0 | 1 | 0 | 0 | 1 | 0 | 0 | 1 | 4 |
| <u>ZNF295</u>   | 1 | 0 | 0 | 1 | 0 | 0 | 1 | 0 | 0 | 1 | 4 |
| <u>ZNF295</u>   | 1 | 1 | 0 | 1 | 0 | 0 | 0 | 0 | 0 | 1 | 4 |
| <u>SCAPER</u>   | 0 | 1 | 0 | 1 | 0 | 0 | 1 | 0 | 0 | 1 | 4 |
| <u>MINK1</u>    | 1 | 0 | 0 | 1 | 1 | 0 | 0 | 0 | 0 | 1 | 4 |

|                 |   |   |   |   |   |   |   |   |   |   |   |
|-----------------|---|---|---|---|---|---|---|---|---|---|---|
| <u>PAFAH1B2</u> | 1 | 1 | 0 | 1 | 0 | 0 | 1 | 0 | 0 | 0 | 4 |
| <u>DUOX2</u>    | 1 | 1 | 0 | 1 | 0 | 0 | 1 | 0 | 0 | 0 | 4 |
| <u>ARHGEF3</u>  | 1 | 1 | 0 | 1 | 0 | 0 | 0 | 0 | 0 | 1 | 4 |
| <u>ARHGEF3</u>  | 1 | 0 | 1 | 1 | 0 | 0 | 0 | 0 | 0 | 1 | 4 |
| <u>SLC35C2</u>  | 1 | 1 | 0 | 1 | 0 | 0 | 0 | 0 | 0 | 1 | 4 |
| <u>EXOSC3</u>   | 1 | 1 | 0 | 1 | 0 | 0 | 0 | 0 | 0 | 1 | 4 |
| <u>GOLT1B</u>   | 1 | 1 | 0 | 1 | 0 | 0 | 1 | 0 | 0 | 0 | 4 |
| <u>KLHL5</u>    | 1 | 0 | 0 | 1 | 1 | 0 | 0 | 0 | 0 | 1 | 4 |
| <u>ASB3</u>     | 1 | 1 | 0 | 1 | 0 | 0 | 0 | 0 | 0 | 1 | 4 |
| <u>CYB5R4</u>   | 1 | 1 | 0 | 1 | 0 | 0 | 1 | 0 | 0 | 0 | 4 |
| <u>CLDN18</u>   | 1 | 1 | 0 | 1 | 0 | 0 | 0 | 0 | 0 | 1 | 4 |
| <u>CLDN18</u>   | 1 | 0 | 0 | 1 | 0 | 0 | 1 | 0 | 0 | 1 | 4 |
| <u>PHF20</u>    | 1 | 1 | 0 | 1 | 0 | 0 | 1 | 0 | 0 | 0 | 4 |
| <u>PLAC8</u>    | 1 | 1 | 0 | 1 | 0 | 0 | 0 | 0 | 0 | 1 | 4 |
| <u>PLAC8</u>    | 1 | 1 | 0 | 1 | 0 | 0 | 0 | 0 | 0 | 1 | 4 |
| <u>MRPL35</u>   | 1 | 1 | 0 | 1 | 0 | 0 | 1 | 0 | 0 | 0 | 4 |
| <u>DACT1</u>    | 1 | 1 | 0 | 1 | 0 | 0 | 1 | 0 | 0 | 0 | 4 |
| <u>ZNF117</u>   | 0 | 1 | 0 | 1 | 0 | 0 | 1 | 0 | 0 | 1 | 4 |
| <u>UBE2J1</u>   | 0 | 1 | 0 | 1 | 0 | 0 | 1 | 0 | 0 | 1 | 4 |
| <u>TRIAP1</u>   | 1 | 1 | 0 | 1 | 0 | 0 | 1 | 0 | 0 | 0 | 4 |
| <u>VTA1</u>     | 1 | 1 | 0 | 1 | 0 | 0 | 1 | 0 | 0 | 0 | 4 |
| <u>ARMCX3</u>   | 1 | 0 | 0 | 1 | 0 | 0 | 1 | 0 | 0 | 1 | 4 |
| <u>KLF13</u>    | 1 | 1 | 0 | 1 | 0 | 0 | 1 | 0 | 0 | 0 | 4 |
| <u>VPS24</u>    | 1 | 0 | 0 | 1 | 0 | 0 | 1 | 0 | 0 | 1 | 4 |
| <u>TM7SF3</u>   | 0 | 1 | 0 | 1 | 0 | 0 | 0 | 1 | 0 | 1 | 4 |
| <u>ZAK</u>      | 1 | 1 | 0 | 1 | 0 | 0 | 0 | 0 | 0 | 1 | 4 |
| <u>PKHD1</u>    | 1 | 1 | 0 | 1 | 0 | 0 | 1 | 0 | 0 | 0 | 4 |
| <u>PKP2</u>     | 1 | 1 | 0 | 1 | 0 | 0 | 0 | 0 | 0 | 1 | 4 |
| <u>PLA2G5</u>   | 1 | 1 | 0 | 1 | 0 | 0 | 1 | 0 | 0 | 0 | 4 |
| <u>PLAG1</u>    | 1 | 1 | 0 | 1 | 0 | 0 | 0 | 0 | 0 | 1 | 4 |
| <u>PLP1</u>     | 1 | 1 | 0 | 1 | 1 | 0 | 0 | 0 | 0 | 0 | 4 |
| <u>BRWD1</u>    | 1 | 1 | 0 | 1 | 0 | 0 | 0 | 0 | 0 | 1 | 4 |
| <u>BRWD1</u>    | 1 | 1 | 0 | 1 | 0 | 0 | 0 | 0 | 0 | 1 | 4 |
| <u>PODXL</u>    | 1 | 0 | 0 | 1 | 0 | 0 | 1 | 0 | 0 | 1 | 4 |
| <u>PODXL</u>    | 1 | 1 | 0 | 1 | 0 | 0 | 0 | 0 | 0 | 1 | 4 |
| <u>KCNK10</u>   | 1 | 0 | 0 | 1 | 1 | 0 | 0 | 0 | 0 | 1 | 4 |
| <u>KCNK10</u>   | 1 | 0 | 0 | 1 | 1 | 0 | 0 | 0 | 0 | 1 | 4 |
| <u>POMC</u>     | 1 | 1 | 0 | 1 | 0 | 0 | 0 | 0 | 0 | 1 | 4 |
| <u>DNAJC10</u>  | 1 | 1 | 0 | 1 | 0 | 0 | 1 | 0 | 0 | 0 | 4 |
| <u>XRN1</u>     | 1 | 1 | 0 | 1 | 0 | 0 | 0 | 0 | 0 | 1 | 4 |
| <u>NLE1</u>     | 1 | 0 | 0 | 1 | 0 | 0 | 1 | 0 | 0 | 1 | 4 |

|                    |   |   |   |   |   |   |   |   |   |   |   |
|--------------------|---|---|---|---|---|---|---|---|---|---|---|
| <u>NLE1</u>        | 1 | 1 | 0 | 1 | 0 | 0 | 0 | 0 | 0 | 1 | 4 |
| <u>CCDC93</u>      | 1 | 1 | 0 | 1 | 0 | 0 | 1 | 0 | 0 | 0 | 4 |
| <u>USP53</u>       | 0 | 1 | 0 | 1 | 0 | 0 | 1 | 0 | 0 | 1 | 4 |
| <u>GNL3L</u>       | 1 | 1 | 0 | 1 | 0 | 0 | 1 | 0 | 0 | 0 | 4 |
| <u>LZTFL1</u>      | 1 | 1 | 0 | 1 | 0 | 0 | 1 | 0 | 0 | 0 | 4 |
| <u>CCNJ</u>        | 1 | 1 | 0 | 1 | 0 | 0 | 0 | 0 | 0 | 1 | 4 |
| <u>PPARA</u>       | 1 | 1 | 0 | 1 | 0 | 0 | 0 | 0 | 0 | 1 | 4 |
| <u>TMEM106B</u>    | 1 | 1 | 0 | 1 | 0 | 0 | 0 | 0 | 0 | 1 | 4 |
| <u>PPM2C</u>       | 1 | 0 | 0 | 1 | 0 | 0 | 1 | 0 | 0 | 1 | 4 |
| <u>TRIM44</u>      | 0 | 1 | 0 | 1 | 0 | 0 | 1 | 0 | 0 | 1 | 4 |
| <u>TET2</u>        | 1 | 1 | 0 | 1 | 0 | 0 | 0 | 0 | 0 | 1 | 4 |
| <u>AFTPH</u>       | 0 | 0 | 0 | 1 | 1 | 1 | 0 | 0 | 0 | 1 | 4 |
| <u>ZNF280D</u>     | 1 | 0 | 0 | 1 | 1 | 0 | 0 | 0 | 0 | 1 | 4 |
| <u>GDAP2</u>       | 1 | 1 | 0 | 1 | 0 | 0 | 1 | 0 | 0 | 0 | 4 |
| <u>BIVM</u>        | 1 | 0 | 0 | 1 | 0 | 0 | 1 | 0 | 0 | 1 | 4 |
| <u>PAQR5</u>       | 1 | 0 | 0 | 1 | 0 | 0 | 1 | 0 | 0 | 1 | 4 |
| <u>PAQR5</u>       | 1 | 1 | 0 | 1 | 0 | 0 | 0 | 0 | 0 | 1 | 4 |
| <u>GON4L</u>       | 1 | 1 | 0 | 1 | 0 | 0 | 1 | 0 | 0 | 0 | 4 |
| <u>bA16L21.2.1</u> | 1 | 1 | 0 | 1 | 0 | 0 | 1 | 0 | 0 | 0 | 4 |
| <u>RP11-35N6.1</u> | 1 | 1 | 0 | 1 | 0 | 0 | 1 | 0 | 0 | 0 | 4 |
| <u>MTMR10</u>      | 0 | 1 | 0 | 1 | 0 | 0 | 1 | 0 | 0 | 1 | 4 |
| <u>LAX1</u>        | 1 | 1 | 0 | 1 | 0 | 0 | 1 | 0 | 0 | 0 | 4 |
| <u>RASIP1</u>      | 1 | 1 | 0 | 1 | 0 | 0 | 1 | 0 | 0 | 0 | 4 |
| <u>UBE2R2</u>      | 1 | 1 | 0 | 1 | 0 | 0 | 1 | 0 | 0 | 0 | 4 |
| <u>RG9MTD1</u>     | 0 | 1 | 0 | 1 | 0 | 0 | 1 | 0 | 0 | 1 | 4 |
| <u>OCIAD1</u>      | 1 | 1 | 0 | 1 | 0 | 0 | 0 | 0 | 0 | 1 | 4 |
| <u>OCIAD1</u>      | 1 | 1 | 0 | 1 | 0 | 0 | 0 | 0 | 0 | 1 | 4 |
| <u>PRPF39</u>      | 1 | 1 | 0 | 1 | 0 | 0 | 1 | 0 | 0 | 0 | 4 |
| <u>CDCA4</u>       | 1 | 1 | 0 | 1 | 0 | 0 | 0 | 0 | 0 | 1 | 4 |
| <u>C9orf68</u>     | 0 | 1 | 0 | 1 | 0 | 0 | 1 | 0 | 0 | 1 | 4 |
| <u>MED9</u>        | 1 | 1 | 0 | 1 | 0 | 0 | 1 | 0 | 0 | 0 | 4 |
| <u>SAMD4B</u>      | 1 | 1 | 0 | 1 | 0 | 0 | 1 | 0 | 0 | 0 | 4 |
| <u>THAP1</u>       | 1 | 1 | 0 | 1 | 0 | 0 | 0 | 0 | 0 | 1 | 4 |
| <u>SDAD1</u>       | 1 | 1 | 0 | 1 | 0 | 0 | 1 | 0 | 0 | 0 | 4 |
| <u>SLC25A36</u>    | 0 | 1 | 0 | 1 | 0 | 0 | 1 | 0 | 0 | 1 | 4 |
| <u>VPS13D</u>      | 1 | 1 | 0 | 1 | 0 | 0 | 1 | 0 | 0 | 0 | 4 |
| <u>PBRM1</u>       | 1 | 1 | 0 | 1 | 0 | 0 | 0 | 0 | 0 | 1 | 4 |
| <u>PBRM1</u>       | 1 | 0 | 0 | 1 | 0 | 0 | 1 | 0 | 0 | 1 | 4 |
| <u>TMEM206</u>     | 1 | 1 | 0 | 1 | 0 | 0 | 1 | 0 | 0 | 0 | 4 |
| <u>FLJ11151</u>    | 0 | 1 | 0 | 1 | 0 | 0 | 1 | 0 | 0 | 1 | 4 |
| <u>WDR33</u>       | 1 | 1 | 0 | 1 | 0 | 0 | 0 | 0 | 0 | 1 | 4 |

|                   |   |   |   |   |   |   |   |   |   |   |   |
|-------------------|---|---|---|---|---|---|---|---|---|---|---|
| <u>HEMGN</u>      | 1 | 1 | 0 | 1 | 0 | 0 | 0 | 0 | 0 | 1 | 4 |
| <u>PRCP</u>       | 1 | 0 | 0 | 1 | 0 | 0 | 1 | 0 | 0 | 1 | 4 |
| <u>SLC30A10</u>   | 1 | 1 | 0 | 1 | 0 | 0 | 1 | 0 | 0 | 0 | 4 |
| <u>RBM38</u>      | 1 | 1 | 0 | 1 | 0 | 0 | 1 | 0 | 0 | 0 | 4 |
| <u>PLXNA3</u>     | 1 | 1 | 0 | 1 | 0 | 0 | 1 | 0 | 0 | 0 | 4 |
| <u>DDX60</u>      | 1 | 0 | 0 | 1 | 0 | 0 | 1 | 0 | 0 | 1 | 4 |
| <u>PRKAA2</u>     | 0 | 1 | 0 | 1 | 0 | 0 | 1 | 0 | 0 | 1 | 4 |
| <u>ZNF673</u>     | 1 | 1 | 0 | 1 | 0 | 0 | 0 | 0 | 0 | 1 | 4 |
| <u>PRPF40A</u>    | 0 | 1 | 0 | 1 | 0 | 0 | 1 | 0 | 0 | 1 | 4 |
| <u>ASF1B</u>      | 1 | 1 | 0 | 1 | 0 | 0 | 1 | 0 | 0 | 0 | 4 |
| <u>PARVA</u>      | 1 | 1 | 0 | 1 | 0 | 0 | 1 | 0 | 0 | 0 | 4 |
| <u>ZNF83</u>      | 0 | 0 | 1 | 1 | 0 | 0 | 1 | 0 | 0 | 1 | 4 |
| <u>ZNF83</u>      | 1 | 1 | 0 | 1 | 0 | 0 | 0 | 0 | 0 | 1 | 4 |
| <u>PRKAR2B</u>    | 1 | 1 | 0 | 1 | 0 | 0 | 1 | 0 | 0 | 0 | 4 |
| <u>FLJ11171</u>   | 1 | 1 | 0 | 1 | 0 | 0 | 0 | 0 | 0 | 1 | 4 |
| <u>FLJ11171</u>   | 1 | 0 | 0 | 1 | 0 | 0 | 1 | 0 | 0 | 1 | 4 |
| <u>CSGALNACT1</u> | 1 | 1 | 0 | 1 | 0 | 0 | 0 | 0 | 0 | 1 | 4 |
| <u>FOXJ2</u>      | 1 | 1 | 0 | 1 | 0 | 0 | 1 | 0 | 0 | 0 | 4 |
| <u>IQWD1</u>      | 1 | 1 | 0 | 1 | 0 | 0 | 1 | 0 | 0 | 0 | 4 |
| <u>CAND1</u>      | 1 | 1 | 0 | 1 | 0 | 0 | 1 | 0 | 0 | 0 | 4 |
| <u>MLL5</u>       | 1 | 1 | 0 | 1 | 0 | 0 | 0 | 0 | 0 | 1 | 4 |
| <u>C20orf24</u>   | 1 | 1 | 0 | 1 | 0 | 0 | 1 | 0 | 0 | 0 | 4 |
| <u>FAM54B</u>     | 1 | 0 | 0 | 1 | 0 | 0 | 1 | 0 | 0 | 1 | 4 |
| <u>PRM1</u>       | 1 | 1 | 0 | 1 | 0 | 0 | 1 | 0 | 0 | 0 | 4 |
| <u>PRRG1</u>      | 1 | 0 | 0 | 1 | 0 | 0 | 1 | 0 | 0 | 1 | 4 |
| <u>KLK7</u>       | 0 | 1 | 0 | 1 | 0 | 0 | 1 | 0 | 0 | 1 | 4 |
| <u>PSAP</u>       | 1 | 0 | 0 | 1 | 0 | 0 | 1 | 0 | 0 | 1 | 4 |
| <u>TRIM39</u>     | 1 | 0 | 0 | 1 | 1 | 0 | 0 | 0 | 0 | 1 | 4 |
| <u>KCNK13</u>     | 1 | 1 | 0 | 1 | 0 | 0 | 1 | 0 | 0 | 0 | 4 |
| <u>JPH1</u>       | 1 | 1 | 0 | 1 | 0 | 0 | 1 | 0 | 0 | 0 | 4 |
| <u>PSG5</u>       | 0 | 0 | 1 | 1 | 0 | 0 | 1 | 0 | 0 | 1 | 4 |
| <u>PSG11</u>      | 0 | 0 | 1 | 1 | 0 | 0 | 1 | 0 | 0 | 1 | 4 |
| <u>KCMF1</u>      | 0 | 1 | 0 | 1 | 0 | 0 | 1 | 0 | 0 | 1 | 4 |
| <u>PAPOLB</u>     | 0 | 1 | 0 | 1 | 0 | 0 | 1 | 0 | 0 | 1 | 4 |
| <u>SMARCAD1</u>   | 1 | 1 | 0 | 1 | 0 | 0 | 0 | 0 | 0 | 1 | 4 |
| <u>MEPE</u>       | 0 | 1 | 0 | 1 | 0 | 0 | 1 | 0 | 0 | 1 | 4 |
| <u>KTELC1</u>     | 1 | 1 | 0 | 1 | 0 | 0 | 1 | 0 | 0 | 0 | 4 |
| <u>TULP4</u>      | 1 | 1 | 0 | 1 | 0 | 0 | 0 | 0 | 0 | 1 | 4 |
| <u>BAAT</u>       | 1 | 1 | 0 | 1 | 0 | 0 | 0 | 0 | 0 | 1 | 4 |
| <u>ENTPD7</u>     | 0 | 1 | 0 | 1 | 0 | 0 | 1 | 0 | 0 | 1 | 4 |
| <u>CPA6</u>       | 1 | 1 | 0 | 1 | 0 | 0 | 1 | 0 | 0 | 0 | 4 |

|                 |   |   |   |   |   |   |   |   |   |   |   |
|-----------------|---|---|---|---|---|---|---|---|---|---|---|
| <u>GOPC</u>     | 1 | 1 | 0 | 1 | 0 | 0 | 0 | 0 | 0 | 1 | 4 |
| <u>GOPC</u>     | 1 | 0 | 0 | 1 | 0 | 0 | 1 | 0 | 0 | 1 | 4 |
| <u>PAK7</u>     | 1 | 1 | 0 | 1 | 0 | 0 | 0 | 0 | 0 | 1 | 4 |
| <u>LYRM1</u>    | 1 | 0 | 1 | 1 | 0 | 0 | 0 | 0 | 0 | 1 | 4 |
| <u>PSMD13</u>   | 1 | 0 | 0 | 1 | 0 | 0 | 1 | 1 | 0 | 0 | 4 |
| <u>ZNF248</u>   | 0 | 1 | 0 | 1 | 0 | 0 | 1 | 0 | 0 | 1 | 4 |
| <u>GPR126</u>   | 1 | 1 | 0 | 1 | 0 | 0 | 0 | 0 | 0 | 1 | 4 |
| <u>LYRM2</u>    | 0 | 1 | 0 | 1 | 0 | 0 | 1 | 0 | 0 | 1 | 4 |
| <u>NDRG2</u>    | 1 | 0 | 0 | 1 | 0 | 0 | 1 | 0 | 0 | 1 | 4 |
| <u>NDRG2</u>    | 1 | 1 | 0 | 1 | 0 | 0 | 0 | 0 | 0 | 1 | 4 |
| <u>SLC12A5</u>  | 1 | 0 | 0 | 1 | 0 | 0 | 1 | 0 | 0 | 1 | 4 |
| <u>ERMN</u>     | 1 | 1 | 0 | 1 | 0 | 0 | 0 | 0 | 0 | 1 | 4 |
| <u>ERMN</u>     | 1 | 0 | 0 | 1 | 0 | 0 | 1 | 0 | 0 | 1 | 4 |
| <u>ZNF398</u>   | 1 | 0 | 0 | 1 | 0 | 0 | 1 | 0 | 0 | 1 | 4 |
| <u>ZNF398</u>   | 1 | 1 | 0 | 1 | 0 | 0 | 0 | 0 | 0 | 1 | 4 |
| <u>AADAACL1</u> | 1 | 0 | 0 | 1 | 0 | 0 | 1 | 0 | 0 | 1 | 4 |
| <u>KIAA1377</u> | 1 | 1 | 0 | 1 | 0 | 0 | 1 | 0 | 0 | 0 | 4 |
| <u>FAM135A</u>  | 1 | 0 | 0 | 1 | 0 | 0 | 1 | 0 | 0 | 1 | 4 |
| <u>KIAA1549</u> | 0 | 1 | 0 | 1 | 0 | 0 | 1 | 0 | 0 | 1 | 4 |
| <u>ZNF317</u>   | 1 | 1 | 0 | 1 | 0 | 0 | 1 | 0 | 0 | 0 | 4 |
| <u>NOPE</u>     | 1 | 1 | 0 | 1 | 0 | 0 | 1 | 0 | 0 | 0 | 4 |
| <u>SF4</u>      | 1 | 1 | 0 | 1 | 0 | 0 | 1 | 0 | 0 | 0 | 4 |
| <u>PTPRD</u>    | 1 | 1 | 0 | 1 | 0 | 0 | 1 | 0 | 0 | 0 | 4 |
| <u>PWP2</u>     | 0 | 1 | 0 | 1 | 0 | 0 | 1 | 0 | 0 | 1 | 4 |
| <u>PXMP2</u>    | 0 | 1 | 0 | 1 | 0 | 0 | 1 | 0 | 0 | 1 | 4 |
| <u>PXMP3</u>    | 1 | 1 | 0 | 1 | 0 | 0 | 0 | 0 | 0 | 1 | 4 |
| <u>RHOU</u>     | 1 | 1 | 0 | 1 | 0 | 0 | 1 | 0 | 0 | 0 | 4 |
| <u>C6orf115</u> | 1 | 1 | 0 | 1 | 0 | 0 | 1 | 0 | 0 | 0 | 4 |
| <u>JARID1A</u>  | 1 | 1 | 0 | 1 | 0 | 0 | 0 | 0 | 0 | 1 | 4 |
| <u>RBL2</u>     | 1 | 1 | 0 | 1 | 0 | 0 | 1 | 0 | 0 | 0 | 4 |
| <u>RECQL</u>    | 1 | 0 | 0 | 1 | 0 | 0 | 1 | 0 | 0 | 1 | 4 |
| <u>RECQL</u>    | 1 | 1 | 0 | 1 | 0 | 0 | 0 | 0 | 0 | 1 | 4 |
| <u>BCL2L2</u>   | 1 | 1 | 0 | 1 | 0 | 0 | 1 | 0 | 0 | 0 | 4 |
| <u>RGS13</u>    | 1 | 0 | 0 | 1 | 0 | 0 | 1 | 0 | 0 | 1 | 4 |
| <u>RIT1</u>     | 1 | 1 | 0 | 1 | 0 | 0 | 1 | 0 | 0 | 0 | 4 |
| <u>BCL6</u>     | 0 | 0 | 0 | 1 | 1 | 1 | 0 | 0 | 0 | 1 | 4 |
| <u>RNF6</u>     | 1 | 1 | 0 | 1 | 0 | 0 | 0 | 0 | 0 | 1 | 4 |
| <u>HPSE2</u>    | 1 | 1 | 0 | 1 | 0 | 0 | 1 | 0 | 0 | 0 | 4 |
| <u>CLIP1</u>    | 1 | 0 | 0 | 1 | 1 | 0 | 0 | 0 | 0 | 1 | 4 |
| <u>RTN1</u>     | 1 | 1 | 0 | 1 | 0 | 0 | 1 | 0 | 0 | 0 | 4 |
| <u>SC5DL</u>    | 1 | 0 | 0 | 1 | 0 | 0 | 1 | 0 | 0 | 1 | 4 |

|                  |   |   |   |   |   |   |   |   |   |   |   |
|------------------|---|---|---|---|---|---|---|---|---|---|---|
| <u>SC5DL</u>     | 1 | 1 | 0 | 1 | 0 | 0 | 0 | 0 | 0 | 1 | 4 |
| <u>ATXN1</u>     | 1 | 1 | 0 | 1 | 0 | 0 | 0 | 0 | 0 | 1 | 4 |
| <u>SCN2B</u>     | 1 | 1 | 0 | 1 | 0 | 0 | 1 | 0 | 0 | 0 | 4 |
| <u>C10orf84</u>  | 1 | 0 | 0 | 1 | 0 | 0 | 1 | 0 | 0 | 1 | 4 |
| <u>ANKRD5</u>    | 1 | 0 | 0 | 1 | 0 | 0 | 1 | 0 | 0 | 1 | 4 |
| <u>ANKRD5</u>    | 1 | 1 | 0 | 1 | 0 | 0 | 0 | 0 | 0 | 1 | 4 |
| <u>FIGNL1</u>    | 1 | 1 | 0 | 1 | 0 | 0 | 1 | 0 | 0 | 0 | 4 |
| <u>ZNF674</u>    | 0 | 1 | 0 | 1 | 0 | 0 | 1 | 0 | 0 | 1 | 4 |
| <u>SFRP5</u>     | 1 | 1 | 0 | 1 | 0 | 0 | 1 | 0 | 0 | 0 | 4 |
| <u>SFRS1</u>     | 0 | 1 | 0 | 1 | 0 | 0 | 1 | 0 | 0 | 1 | 4 |
| <u>SFRS1</u>     | 1 | 1 | 0 | 1 | 0 | 0 | 0 | 0 | 0 | 1 | 4 |
| <u>SFRS3</u>     | 1 | 1 | 0 | 1 | 0 | 0 | 1 | 0 | 0 | 0 | 4 |
| <u>SFRS5</u>     | 1 | 0 | 0 | 1 | 0 | 0 | 1 | 0 | 0 | 1 | 4 |
| <u>SFRS5</u>     | 1 | 1 | 0 | 1 | 0 | 0 | 0 | 0 | 0 | 1 | 4 |
| <u>ZFP106</u>    | 1 | 1 | 0 | 1 | 0 | 0 | 1 | 0 | 0 | 0 | 4 |
| <u>LOC644096</u> | 1 | 1 | 0 | 1 | 0 | 0 | 1 | 0 | 0 | 0 | 4 |
| <u>CSMD1</u>     | 0 | 1 | 0 | 1 | 0 | 0 | 1 | 0 | 0 | 1 | 4 |
| <u>SH3BP2</u>    | 1 | 0 | 0 | 1 | 0 | 0 | 1 | 0 | 0 | 1 | 4 |
| <u>CTAGE1</u>    | 0 | 1 | 0 | 1 | 0 | 0 | 1 | 0 | 0 | 1 | 4 |
| <u>CRTC3</u>     | 0 | 1 | 0 | 1 | 0 | 0 | 1 | 1 | 0 | 0 | 4 |
| <u>RABL5</u>     | 1 | 1 | 0 | 1 | 0 | 0 | 0 | 0 | 0 | 1 | 4 |
| <u>RMND5A</u>    | 0 | 1 | 0 | 1 | 0 | 0 | 1 | 1 | 0 | 0 | 4 |
| <u>IL25</u>      | 1 | 1 | 0 | 1 | 0 | 0 | 0 | 0 | 0 | 1 | 4 |
| <u>ST3GAL1</u>   | 1 | 0 | 0 | 1 | 0 | 0 | 1 | 0 | 0 | 1 | 4 |
| <u>ST3GAL1</u>   | 1 | 1 | 0 | 1 | 0 | 0 | 0 | 0 | 0 | 1 | 4 |
| <u>SLC13A3</u>   | 1 | 0 | 0 | 1 | 0 | 0 | 1 | 0 | 0 | 1 | 4 |
| <u>SLC13A3</u>   | 1 | 1 | 0 | 1 | 0 | 0 | 0 | 0 | 0 | 1 | 4 |
| <u>USP46</u>     | 1 | 1 | 0 | 1 | 0 | 0 | 0 | 0 | 0 | 1 | 4 |
| <u>PCDH20</u>    | 1 | 1 | 0 | 1 | 0 | 0 | 1 | 0 | 0 | 0 | 4 |
| <u>TTC23</u>     | 1 | 0 | 0 | 1 | 0 | 0 | 1 | 0 | 0 | 1 | 4 |
| <u>TTC23</u>     | 1 | 1 | 0 | 1 | 0 | 0 | 0 | 0 | 0 | 1 | 4 |
| <u>MRPS9</u>     | 1 | 1 | 0 | 1 | 0 | 0 | 1 | 0 | 0 | 0 | 4 |
| <u>BMP2</u>      | 1 | 1 | 0 | 1 | 0 | 0 | 1 | 0 | 0 | 0 | 4 |
| <u>SKP1</u>      | 0 | 1 | 1 | 1 | 0 | 0 | 0 | 0 | 0 | 1 | 4 |
| <u>SLA</u>       | 1 | 1 | 0 | 1 | 0 | 0 | 0 | 0 | 0 | 1 | 4 |
| <u>GPBP1</u>     | 1 | 0 | 1 | 1 | 0 | 0 | 0 | 0 | 0 | 1 | 4 |
| <u>GPBP1</u>     | 1 | 1 | 0 | 1 | 0 | 0 | 0 | 0 | 0 | 1 | 4 |
| <u>ALS2CR4</u>   | 1 | 0 | 0 | 1 | 0 | 0 | 1 | 0 | 0 | 1 | 4 |
| <u>ALS2CR4</u>   | 1 | 1 | 0 | 1 | 0 | 0 | 0 | 0 | 0 | 1 | 4 |
| <u>BMP3</u>      | 0 | 1 | 0 | 1 | 0 | 0 | 1 | 0 | 0 | 1 | 4 |
| <u>SLC16A2</u>   | 1 | 1 | 0 | 1 | 0 | 0 | 1 | 0 | 0 | 0 | 4 |

|                  |   |   |   |   |   |   |   |   |   |   |   |
|------------------|---|---|---|---|---|---|---|---|---|---|---|
| <u>HLTF</u>      | 1 | 1 | 0 | 1 | 0 | 0 | 0 | 0 | 0 | 1 | 4 |
| <u>KCTD14</u>    | 1 | 1 | 0 | 1 | 0 | 0 | 1 | 0 | 0 | 0 | 4 |
| <u>BOLL</u>      | 1 | 1 | 0 | 1 | 0 | 0 | 0 | 0 | 0 | 1 | 4 |
| <u>SOD3</u>      | 1 | 1 | 0 | 1 | 0 | 0 | 1 | 0 | 0 | 0 | 4 |
| <u>BOK</u>       | 1 | 1 | 0 | 1 | 0 | 0 | 1 | 0 | 0 | 0 | 4 |
| <u>SOX9</u>      | 1 | 1 | 0 | 1 | 0 | 0 | 1 | 0 | 0 | 0 | 4 |
| <u>SPAG1</u>     | 1 | 0 | 0 | 1 | 0 | 0 | 1 | 0 | 0 | 1 | 4 |
| <u>SPAG1</u>     | 1 | 1 | 0 | 1 | 0 | 0 | 0 | 0 | 0 | 1 | 4 |
| <u>SRI</u>       | 0 | 1 | 0 | 1 | 0 | 0 | 1 | 0 | 0 | 1 | 4 |
| <u>SREBF2</u>    | 1 | 1 | 0 | 1 | 0 | 0 | 1 | 0 | 0 | 0 | 4 |
| <u>SRPK2</u>     | 1 | 1 | 0 | 1 | 0 | 0 | 0 | 0 | 0 | 1 | 4 |
| <u>ZFP36L2</u>   | 0 | 1 | 1 | 1 | 0 | 0 | 1 | 0 | 0 | 0 | 4 |
| <u>SYN2</u>      | 0 | 1 | 0 | 1 | 0 | 0 | 1 | 0 | 0 | 1 | 4 |
| <u>CNTN2</u>     | 1 | 1 | 0 | 1 | 0 | 0 | 1 | 0 | 0 | 0 | 4 |
| <u>TCF4</u>      | 0 | 1 | 0 | 1 | 0 | 0 | 1 | 0 | 0 | 1 | 4 |
| <u>TFDP1</u>     | 1 | 1 | 0 | 1 | 0 | 0 | 1 | 0 | 0 | 0 | 4 |
| <u>TFRC</u>      | 1 | 1 | 0 | 1 | 0 | 0 | 0 | 0 | 0 | 1 | 4 |
| <u>THRB</u>      | 1 | 1 | 0 | 1 | 0 | 0 | 0 | 0 | 0 | 1 | 4 |
| <u>TIA1</u>      | 0 | 1 | 1 | 1 | 0 | 0 | 1 | 0 | 0 | 0 | 4 |
| <u>TSPAN7</u>    | 1 | 1 | 0 | 1 | 0 | 0 | 1 | 0 | 0 | 0 | 4 |
| <u>GPR137B</u>   | 1 | 1 | 0 | 1 | 0 | 0 | 1 | 0 | 0 | 0 | 4 |
| <u>TNF</u>       | 0 | 1 | 1 | 1 | 0 | 0 | 0 | 0 | 0 | 1 | 4 |
| <u>TNS1</u>      | 0 | 1 | 0 | 1 | 0 | 0 | 1 | 0 | 0 | 1 | 4 |
| <u>TPD52L2</u>   | 1 | 1 | 0 | 1 | 0 | 0 | 1 | 0 | 0 | 0 | 4 |
| <u>TRPS1</u>     | 1 | 1 | 0 | 1 | 0 | 0 | 1 | 0 | 0 | 0 | 4 |
| <u>TSC1</u>      | 1 | 1 | 0 | 1 | 0 | 0 | 1 | 0 | 0 | 0 | 4 |
| <u>C5AR1</u>     | 1 | 1 | 0 | 1 | 0 | 0 | 1 | 0 | 0 | 0 | 4 |
| <u>D2HGDH</u>    | 1 | 1 | 0 | 1 | 0 | 0 | 0 | 0 | 0 | 1 | 4 |
| <u>C6orf35</u>   | 0 | 1 | 1 | 1 | 0 | 0 | 0 | 0 | 0 | 1 | 4 |
| <u>LOC729830</u> | 0 | 1 | 0 | 1 | 0 | 0 | 1 | 0 | 0 | 1 | 4 |
| <u>UBE2A</u>     | 1 | 1 | 0 | 1 | 0 | 0 | 0 | 0 | 0 | 1 | 4 |
| <u>UBE2G1</u>    | 1 | 1 | 0 | 1 | 0 | 0 | 1 | 0 | 0 | 0 | 4 |
| <u>UBP1</u>      | 1 | 1 | 0 | 1 | 0 | 0 | 0 | 0 | 0 | 1 | 4 |
| <u>VDR</u>       | 1 | 1 | 0 | 1 | 0 | 0 | 0 | 0 | 0 | 1 | 4 |
| <u>VEGFA</u>     | 1 | 1 | 0 | 1 | 0 | 0 | 1 | 0 | 0 | 0 | 4 |
| <u>WHSC1</u>     | 1 | 1 | 0 | 1 | 0 | 0 | 0 | 0 | 0 | 1 | 4 |
| <u>XG</u>        | 1 | 0 | 0 | 1 | 0 | 0 | 1 | 0 | 0 | 1 | 4 |
| <u>C18orf1</u>   | 1 | 0 | 0 | 1 | 0 | 0 | 1 | 0 | 0 | 1 | 4 |
| <u>C18orf1</u>   | 1 | 1 | 0 | 1 | 0 | 0 | 0 | 0 | 0 | 1 | 4 |
| <u>SF1</u>       | 1 | 1 | 0 | 1 | 0 | 0 | 0 | 0 | 0 | 1 | 4 |
| <u>ZSCAN20</u>   | 1 | 1 | 0 | 1 | 0 | 0 | 1 | 0 | 0 | 0 | 4 |



|           |   |   |   |   |   |   |   |   |   |   |   |
|-----------|---|---|---|---|---|---|---|---|---|---|---|
| ZNF35     | 1 | 1 | 0 | 1 | 0 | 0 | 1 | 0 | 0 | 0 | 4 |
| ZNF84     | 1 | 1 | 0 | 1 | 0 | 0 | 0 | 0 | 0 | 1 | 4 |
| ZNF84     | 1 | 0 | 0 | 1 | 0 | 0 | 1 | 0 | 0 | 1 | 4 |
| PSAPL1    | 1 | 1 | 0 | 1 | 0 | 0 | 1 | 0 | 0 | 0 | 4 |
| ZNF148    | 0 | 1 | 0 | 1 | 0 | 0 | 1 | 0 | 0 | 1 | 4 |
| ZNF154    | 0 | 1 | 0 | 1 | 0 | 0 | 1 | 0 | 0 | 1 | 4 |
| VEZF1     | 1 | 1 | 0 | 1 | 0 | 0 | 1 | 0 | 0 | 0 | 4 |
| ZNF200    | 1 | 0 | 0 | 1 | 0 | 0 | 1 | 0 | 0 | 1 | 4 |
| ZNF207    | 1 | 0 | 0 | 1 | 1 | 0 | 0 | 0 | 0 | 1 | 4 |
| ZNF208    | 1 | 1 | 0 | 1 | 0 | 0 | 1 | 0 | 0 | 0 | 4 |
| ZFAND5    | 1 | 0 | 0 | 1 | 0 | 0 | 1 | 0 | 0 | 1 | 4 |
| ZFAND5    | 1 | 1 | 0 | 1 | 0 | 0 | 0 | 0 | 0 | 1 | 4 |
| ZFAND5    | 1 | 0 | 0 | 1 | 1 | 0 | 0 | 0 | 0 | 1 | 4 |
| FAM18A    | 0 | 1 | 0 | 1 | 0 | 0 | 1 | 0 | 0 | 1 | 4 |
| CACNB2    | 1 | 0 | 0 | 1 | 1 | 0 | 0 | 0 | 0 | 1 | 4 |
| CACNB2    | 1 | 0 | 0 | 1 | 1 | 0 | 0 | 0 | 0 | 1 | 4 |
| CACNB2    | 1 | 0 | 0 | 1 | 1 | 0 | 0 | 0 | 0 | 1 | 4 |
| CACNB2    | 1 | 0 | 0 | 1 | 1 | 0 | 0 | 0 | 0 | 1 | 4 |
| SEMA3B    | 0 | 1 | 0 | 1 | 0 | 0 | 1 | 0 | 0 | 1 | 4 |
| ZNF655    | 1 | 1 | 0 | 1 | 0 | 0 | 0 | 0 | 0 | 1 | 4 |
| CARD14    | 1 | 1 | 0 | 1 | 0 | 0 | 1 | 0 | 0 | 0 | 4 |
| JOSD3     | 1 | 1 | 0 | 1 | 0 | 0 | 0 | 0 | 0 | 1 | 4 |
| C20orf121 | 1 | 1 | 0 | 1 | 0 | 0 | 0 | 0 | 0 | 1 | 4 |
| C20orf121 | 1 | 0 | 0 | 1 | 0 | 0 | 1 | 0 | 0 | 1 | 4 |
| ZNF557    | 1 | 1 | 0 | 1 | 0 | 0 | 0 | 0 | 0 | 1 | 4 |
| ZNF557    | 1 | 0 | 0 | 1 | 0 | 0 | 1 | 0 | 0 | 1 | 4 |
| ZXDC      | 1 | 1 | 0 | 1 | 0 | 0 | 1 | 0 | 0 | 0 | 4 |
| LRRC2     | 1 | 1 | 0 | 1 | 0 | 0 | 1 | 0 | 0 | 0 | 4 |
| EPM2A     | 1 | 1 | 0 | 1 | 0 | 0 | 1 | 0 | 0 | 0 | 4 |
| ATP13A3   | 1 | 1 | 0 | 1 | 0 | 0 | 1 | 0 | 0 | 0 | 4 |
| C1orf113  | 1 | 0 | 0 | 1 | 0 | 0 | 1 | 0 | 0 | 1 | 4 |
| ZFHX4     | 0 | 1 | 0 | 1 | 0 | 0 | 1 | 0 | 0 | 1 | 4 |
| ALG9      | 1 | 1 | 0 | 1 | 0 | 0 | 0 | 0 | 0 | 1 | 4 |
| ALS2CR8   | 1 | 1 | 0 | 1 | 0 | 0 | 0 | 0 | 0 | 1 | 4 |
| ALS2CR8   | 1 | 0 | 0 | 1 | 0 | 0 | 1 | 0 | 0 | 1 | 4 |
| METTL8    | 0 | 1 | 0 | 1 | 0 | 0 | 1 | 0 | 0 | 1 | 4 |
| NAT11     | 1 | 1 | 0 | 1 | 0 | 0 | 1 | 0 | 0 | 0 | 4 |
| FAM124B   | 1 | 1 | 0 | 1 | 0 | 0 | 1 | 0 | 0 | 0 | 4 |
| TUSC3     | 1 | 1 | 0 | 1 | 0 | 0 | 0 | 0 | 0 | 1 | 4 |
| SCD5      | 1 | 1 | 0 | 1 | 0 | 0 | 1 | 0 | 0 | 0 | 4 |
| C6orf134  | 1 | 1 | 0 | 1 | 0 | 0 | 0 | 0 | 0 | 1 | 4 |

|                  |   |   |   |   |   |   |   |   |   |   |   |
|------------------|---|---|---|---|---|---|---|---|---|---|---|
| <u>ZNF767</u>    | 0 | 0 | 1 | 1 | 0 | 0 | 1 | 0 | 0 | 1 | 4 |
| <u>DNAJB14</u>   | 1 | 1 | 0 | 1 | 0 | 0 | 0 | 0 | 0 | 1 | 4 |
| <u>ANKRD53</u>   | 1 | 0 | 0 | 1 | 0 | 0 | 1 | 1 | 0 | 0 | 4 |
| <u>C10orf88</u>  | 0 | 1 | 0 | 1 | 0 | 0 | 1 | 0 | 0 | 1 | 4 |
| <u>WWC2</u>      | 0 | 1 | 0 | 1 | 0 | 0 | 1 | 0 | 0 | 1 | 4 |
| <u>ZFP2</u>      | 0 | 1 | 0 | 1 | 0 | 0 | 1 | 0 | 0 | 1 | 4 |
| <u>OPA3</u>      | 0 | 1 | 0 | 1 | 0 | 0 | 1 | 0 | 0 | 1 | 4 |
| <u>C13orf23</u>  | 1 | 0 | 0 | 1 | 1 | 0 | 0 | 0 | 0 | 1 | 4 |
| <u>RAB11FIP1</u> | 1 | 1 | 0 | 1 | 0 | 0 | 1 | 0 | 0 | 0 | 4 |
| <u>CUBN</u>      | 0 | 1 | 0 | 1 | 0 | 0 | 1 | 0 | 0 | 1 | 4 |
| <u>COASY</u>     | 1 | 1 | 0 | 1 | 0 | 0 | 0 | 0 | 0 | 1 | 4 |
| <u>COASY</u>     | 1 | 0 | 0 | 1 | 0 | 0 | 1 | 0 | 0 | 1 | 4 |
| <u>ADAM12</u>    | 1 | 1 | 0 | 1 | 0 | 0 | 1 | 0 | 0 | 0 | 4 |
| <u>TMEM22</u>    | 1 | 0 | 0 | 1 | 0 | 0 | 1 | 0 | 0 | 1 | 4 |
| <u>KHDC1</u>     | 0 | 1 | 0 | 1 | 0 | 0 | 1 | 0 | 0 | 1 | 4 |
| <u>ITIH5</u>     | 1 | 1 | 0 | 1 | 0 | 0 | 0 | 0 | 0 | 1 | 4 |
| <u>CALM3</u>     | 1 | 1 | 0 | 1 | 0 | 0 | 1 | 0 | 0 | 0 | 4 |
| <u>ZNF436</u>    | 1 | 0 | 0 | 1 | 0 | 0 | 1 | 0 | 0 | 1 | 4 |
| <u>ZNF436</u>    | 1 | 1 | 0 | 1 | 0 | 0 | 0 | 0 | 0 | 1 | 4 |
| <u>ZFP91</u>     | 1 | 1 | 0 | 1 | 0 | 0 | 1 | 0 | 0 | 0 | 4 |
| <u>APOL6</u>     | 0 | 1 | 0 | 1 | 0 | 0 | 1 | 0 | 0 | 1 | 4 |
| <u>HMGA2</u>     | 0 | 1 | 0 | 1 | 0 | 0 | 1 | 0 | 0 | 1 | 4 |
| <u>ST8SIA2</u>   | 1 | 1 | 0 | 1 | 0 | 0 | 1 | 0 | 0 | 0 | 4 |
| <u>CALU</u>      | 1 | 1 | 0 | 1 | 0 | 0 | 0 | 0 | 0 | 1 | 4 |
| <u>HM13</u>      | 0 | 1 | 0 | 1 | 0 | 0 | 1 | 0 | 0 | 1 | 4 |
| <u>SLC38A1</u>   | 1 | 0 | 0 | 1 | 0 | 0 | 1 | 0 | 0 | 1 | 4 |
| <u>TSPAN14</u>   | 1 | 1 | 0 | 1 | 0 | 0 | 1 | 0 | 0 | 0 | 4 |
| <u>CAMK2D</u>    | 1 | 1 | 0 | 1 | 0 | 0 | 0 | 0 | 0 | 1 | 4 |
| <u>CAMK2D</u>    | 1 | 1 | 0 | 1 | 0 | 0 | 0 | 0 | 0 | 1 | 4 |
| <u>CAMK2G</u>    | 0 | 0 | 0 | 1 | 1 | 1 | 0 | 0 | 0 | 1 | 4 |
| <u>RNF146</u>    | 1 | 1 | 0 | 1 | 0 | 0 | 1 | 0 | 0 | 0 | 4 |
| <u>SPRY4</u>     | 1 | 1 | 0 | 1 | 0 | 0 | 0 | 0 | 0 | 1 | 4 |
| <u>CABLES2</u>   | 1 | 1 | 0 | 1 | 0 | 0 | 1 | 0 | 0 | 0 | 4 |
| <u>NRIP1</u>     | 1 | 1 | 0 | 1 | 0 | 0 | 1 | 0 | 0 | 0 | 4 |
| <u>JARID1C</u>   | 1 | 1 | 0 | 1 | 0 | 0 | 1 | 0 | 0 | 0 | 4 |
| <u>CASP1</u>     | 0 | 1 | 0 | 1 | 0 | 0 | 1 | 0 | 0 | 1 | 4 |
| <u>CASP2</u>     | 1 | 1 | 0 | 1 | 0 | 0 | 0 | 0 | 0 | 1 | 4 |
| <u>CHST9</u>     | 0 | 1 | 0 | 1 | 0 | 0 | 1 | 0 | 1 | 0 | 4 |
| <u>DNAL1</u>     | 0 | 1 | 1 | 1 | 0 | 0 | 0 | 0 | 0 | 1 | 4 |
| <u>C19orf12</u>  | 1 | 1 | 0 | 1 | 0 | 0 | 0 | 0 | 0 | 1 | 4 |
| <u>DYNLRB1</u>   | 1 | 1 | 0 | 1 | 0 | 0 | 1 | 0 | 0 | 0 | 4 |

|                 |   |   |   |   |   |   |   |   |   |   |   |
|-----------------|---|---|---|---|---|---|---|---|---|---|---|
| <u>CD99L2</u>   | 1 | 1 | 0 | 1 | 0 | 0 | 1 | 0 | 0 | 0 | 4 |
| <u>ATG10</u>    | 1 | 1 | 0 | 1 | 0 | 0 | 0 | 0 | 0 | 1 | 4 |
| <u>NCALD</u>    | 1 | 1 | 0 | 1 | 0 | 0 | 0 | 0 | 0 | 1 | 4 |
| <u>NCALD</u>    | 1 | 0 | 0 | 1 | 0 | 0 | 1 | 0 | 0 | 1 | 4 |
| <u>NCALD</u>    | 1 | 0 | 0 | 1 | 1 | 0 | 0 | 0 | 0 | 1 | 4 |
| <u>TMPRSS13</u> | 1 | 1 | 0 | 1 | 0 | 0 | 1 | 0 | 0 | 0 | 4 |
| <u>KATNAL1</u>  | 1 | 1 | 0 | 1 | 0 | 0 | 0 | 0 | 0 | 1 | 4 |
| <u>KATNAL1</u>  | 1 | 0 | 0 | 1 | 0 | 0 | 1 | 0 | 0 | 1 | 4 |
| <u>MAGT1</u>    | 1 | 1 | 0 | 1 | 0 | 0 | 1 | 0 | 0 | 0 | 4 |
| <u>CASP8</u>    | 1 | 1 | 0 | 1 | 0 | 0 | 1 | 0 | 0 | 0 | 4 |
| <u>ARL6</u>     | 1 | 0 | 0 | 1 | 0 | 0 | 1 | 0 | 1 | 0 | 4 |
| <u>ZNF644</u>   | 1 | 0 | 0 | 1 | 1 | 1 | 0 | 0 | 0 | 0 | 4 |
| <u>ZNF644</u>   | 1 | 0 | 0 | 1 | 1 | 1 | 0 | 0 | 0 | 0 | 4 |
| <u>STX7</u>     | 1 | 1 | 1 | 1 | 0 | 0 | 0 | 0 | 0 | 0 | 4 |
| <u>RHBDD1</u>   | 1 | 1 | 0 | 1 | 0 | 0 | 1 | 0 | 0 | 0 | 4 |
| <u>CAMKK1</u>   | 1 | 0 | 0 | 1 | 0 | 0 | 1 | 0 | 0 | 1 | 4 |
| <u>CAMKK1</u>   | 1 | 1 | 0 | 1 | 0 | 0 | 0 | 0 | 0 | 1 | 4 |
| <u>SLC37A3</u>  | 1 | 1 | 0 | 1 | 0 | 0 | 0 | 0 | 0 | 1 | 4 |
| <u>MGC13057</u> | 1 | 0 | 0 | 1 | 0 | 0 | 1 | 0 | 0 | 1 | 4 |
| <u>MGC13057</u> | 1 | 1 | 0 | 1 | 0 | 0 | 0 | 0 | 0 | 1 | 4 |
| <u>CASP10</u>   | 1 | 0 | 0 | 1 | 1 | 0 | 0 | 0 | 0 | 1 | 4 |
| <u>GPR123</u>   | 1 | 0 | 0 | 1 | 0 | 0 | 1 | 0 | 0 | 1 | 4 |
| <u>ZNF333</u>   | 1 | 1 | 0 | 1 | 0 | 0 | 1 | 0 | 0 | 0 | 4 |
| <u>DYRK2</u>    | 0 | 1 | 0 | 1 | 0 | 0 | 1 | 0 | 0 | 1 | 4 |
| <u>ZNF512</u>   | 0 | 1 | 0 | 1 | 0 | 0 | 1 | 0 | 0 | 1 | 4 |
| <u>L3MBTL3</u>  | 1 | 1 | 0 | 1 | 0 | 0 | 1 | 0 | 0 | 0 | 4 |
| <u>CUL4B</u>    | 1 | 1 | 0 | 1 | 0 | 0 | 1 | 0 | 0 | 0 | 4 |
| <u>JPH4</u>     | 1 | 0 | 0 | 1 | 0 | 0 | 1 | 0 | 0 | 1 | 4 |
| <u>PGBD1</u>    | 1 | 1 | 0 | 1 | 0 | 0 | 1 | 0 | 0 | 0 | 4 |
| <u>GPR174</u>   | 0 | 1 | 0 | 1 | 0 | 0 | 1 | 0 | 0 | 1 | 4 |
| <u>N-PAC</u>    | 1 | 1 | 0 | 1 | 0 | 0 | 1 | 0 | 0 | 0 | 4 |
| <u>SORBS2</u>   | 1 | 0 | 0 | 1 | 0 | 0 | 1 | 0 | 0 | 1 | 4 |
| <u>GTPBP3</u>   | 1 | 1 | 0 | 1 | 0 | 0 | 0 | 0 | 0 | 1 | 4 |
| <u>PSRC1</u>    | 0 | 0 | 1 | 1 | 0 | 0 | 1 | 0 | 0 | 1 | 4 |
| <u>PSRC1</u>    | 1 | 1 | 0 | 1 | 0 | 0 | 0 | 0 | 0 | 1 | 4 |
| <u>OGT</u>      | 1 | 0 | 0 | 1 | 1 | 0 | 0 | 0 | 0 | 1 | 4 |
| <u>CDC42BPA</u> | 1 | 0 | 0 | 1 | 1 | 0 | 0 | 0 | 0 | 1 | 4 |
| <u>MINA</u>     | 1 | 1 | 0 | 1 | 0 | 0 | 0 | 0 | 0 | 1 | 4 |
| <u>HAVCR2</u>   | 1 | 1 | 0 | 1 | 0 | 0 | 1 | 0 | 0 | 0 | 4 |
| <u>ZNF566</u>   | 1 | 0 | 0 | 1 | 0 | 0 | 1 | 0 | 0 | 1 | 4 |
| <u>MAEL</u>     | 1 | 1 | 0 | 1 | 0 | 0 | 1 | 0 | 0 | 0 | 4 |

|                 |   |   |   |   |   |   |   |   |   |   |   |
|-----------------|---|---|---|---|---|---|---|---|---|---|---|
| <u>UBASH3B</u>  | 1 | 1 | 0 | 1 | 0 | 0 | 1 | 0 | 0 | 0 | 4 |
| <u>PPFIBP1</u>  | 1 | 1 | 0 | 1 | 0 | 0 | 1 | 0 | 0 | 0 | 4 |
| <u>USP45</u>    | 0 | 1 | 0 | 1 | 0 | 0 | 1 | 0 | 0 | 1 | 4 |
| <u>CNTNAP4</u>  | 1 | 0 | 0 | 1 | 0 | 0 | 1 | 0 | 0 | 1 | 4 |
| <u>CGGBP1</u>   | 1 | 0 | 0 | 1 | 0 | 0 | 1 | 0 | 0 | 1 | 4 |
| <u>KIAA1751</u> | 1 | 1 | 0 | 1 | 0 | 0 | 1 | 0 | 0 | 0 | 4 |
| <u>DIXDC1</u>   | 1 | 0 | 0 | 1 | 0 | 0 | 1 | 0 | 0 | 1 | 4 |
| <u>TANC1</u>    | 1 | 1 | 0 | 1 | 0 | 0 | 1 | 0 | 0 | 0 | 4 |
| <u>MADD</u>     | 1 | 1 | 0 | 1 | 0 | 0 | 0 | 0 | 0 | 1 | 4 |
| <u>ACTL6A</u>   | 1 | 0 | 0 | 1 | 1 | 0 | 0 | 0 | 0 | 1 | 4 |
| <u>TP63</u>     | 1 | 1 | 0 | 1 | 0 | 0 | 0 | 0 | 0 | 1 | 4 |
| <u>JRK</u>      | 0 | 1 | 0 | 1 | 0 | 0 | 1 | 0 | 0 | 1 | 4 |
| <u>CBFA2T3</u>  | 1 | 0 | 0 | 1 | 1 | 0 | 0 | 0 | 0 | 1 | 4 |
| <u>ABCB11</u>   | 1 | 1 | 0 | 1 | 0 | 0 | 1 | 0 | 0 | 0 | 4 |
| <u>DDX3Y</u>    | 1 | 1 | 0 | 1 | 0 | 0 | 0 | 0 | 0 | 1 | 4 |
| <u>TNK1</u>     | 0 | 1 | 0 | 1 | 0 | 0 | 1 | 0 | 0 | 1 | 4 |
| <u>TRADD</u>    | 1 | 1 | 0 | 1 | 0 | 0 | 1 | 0 | 0 | 0 | 4 |
| <u>ADAM19</u>   | 1 | 1 | 0 | 1 | 0 | 0 | 1 | 0 | 0 | 0 | 4 |
| <u>GBF1</u>     | 1 | 1 | 0 | 1 | 0 | 0 | 1 | 0 | 0 | 0 | 4 |
| <u>RIOK3</u>    | 0 | 1 | 0 | 1 | 0 | 0 | 1 | 0 | 0 | 1 | 4 |
| <u>INPP4B</u>   | 0 | 0 | 0 | 1 | 0 | 0 | 1 | 0 | 1 | 1 | 4 |
| <u>CES2</u>     | 1 | 1 | 0 | 1 | 0 | 0 | 1 | 0 | 0 | 0 | 4 |
| <u>IQGAP1</u>   | 1 | 1 | 0 | 1 | 0 | 0 | 1 | 0 | 0 | 0 | 4 |
| <u>DDEF2</u>    | 1 | 1 | 0 | 1 | 0 | 0 | 1 | 0 | 0 | 0 | 4 |
| <u>ARHGEF7</u>  | 0 | 0 | 0 | 1 | 1 | 1 | 0 | 0 | 0 | 1 | 4 |
| <u>MTMR3</u>    | 0 | 1 | 0 | 1 | 0 | 0 | 1 | 0 | 0 | 1 | 4 |
| <u>GYG2</u>     | 1 | 1 | 0 | 1 | 0 | 0 | 1 | 0 | 0 | 0 | 4 |
| <u>MBD2</u>     | 1 | 1 | 0 | 1 | 0 | 0 | 1 | 0 | 0 | 0 | 4 |
| <u>SKAP2</u>    | 1 | 1 | 0 | 1 | 0 | 0 | 1 | 0 | 0 | 0 | 4 |
| <u>WASF1</u>    | 1 | 1 | 0 | 1 | 0 | 0 | 0 | 0 | 0 | 1 | 4 |
| <u>WASF1</u>    | 1 | 0 | 0 | 1 | 0 | 0 | 1 | 0 | 0 | 1 | 4 |
| <u>HPS4</u>     | 1 | 0 | 0 | 1 | 0 | 0 | 1 | 0 | 0 | 1 | 4 |
| <u>HPS4</u>     | 1 | 1 | 0 | 1 | 0 | 0 | 0 | 0 | 0 | 1 | 4 |
| <u>KLHL6</u>    | 1 | 1 | 0 | 1 | 0 | 0 | 1 | 0 | 0 | 0 | 4 |
| <u>SLC25A21</u> | 1 | 1 | 0 | 1 | 0 | 0 | 1 | 0 | 0 | 0 | 4 |
| <u>HSPB3</u>    | 1 | 1 | 0 | 1 | 0 | 0 | 1 | 0 | 0 | 0 | 4 |
| <u>KALRN</u>    | 1 | 1 | 0 | 1 | 0 | 0 | 0 | 0 | 0 | 1 | 4 |
| <u>CCNG1</u>    | 1 | 1 | 0 | 1 | 0 | 0 | 0 | 0 | 0 | 1 | 4 |
| <u>PHLDB2</u>   | 1 | 1 | 0 | 1 | 0 | 0 | 0 | 0 | 0 | 1 | 4 |
| <u>ZSWIM1</u>   | 0 | 1 | 0 | 1 | 0 | 0 | 1 | 0 | 0 | 1 | 4 |
| <u>RNF8</u>     | 1 | 1 | 0 | 1 | 0 | 0 | 0 | 0 | 0 | 1 | 4 |

|                 |   |   |   |   |   |   |   |   |   |   |   |
|-----------------|---|---|---|---|---|---|---|---|---|---|---|
| <u>C5orf30</u>  | 1 | 1 | 0 | 1 | 0 | 0 | 1 | 0 | 0 | 0 | 4 |
| <u>SPAG9</u>    | 1 | 1 | 0 | 1 | 0 | 0 | 0 | 0 | 0 | 1 | 4 |
| <u>CCDC109A</u> | 1 | 1 | 0 | 1 | 0 | 0 | 1 | 0 | 0 | 0 | 4 |
| <u>SLC7A6</u>   | 1 | 1 | 0 | 1 | 0 | 0 | 0 | 0 | 0 | 1 | 4 |
| <u>COX19</u>    | 0 | 1 | 0 | 1 | 0 | 0 | 1 | 0 | 0 | 1 | 4 |
| <u>CLDN10</u>   | 1 | 1 | 0 | 1 | 0 | 0 | 0 | 0 | 0 | 1 | 4 |
| <u>CLDN10</u>   | 1 | 0 | 0 | 1 | 0 | 0 | 1 | 0 | 0 | 1 | 4 |
| <u>FAM104B</u>  | 1 | 1 | 0 | 1 | 0 | 0 | 1 | 0 | 0 | 0 | 4 |
| <u>ZNF598</u>   | 1 | 1 | 0 | 1 | 0 | 0 | 1 | 0 | 0 | 0 | 4 |
| <u>ZNF697</u>   | 0 | 1 | 0 | 1 | 0 | 0 | 1 | 0 | 0 | 1 | 4 |
| <u>CCDC149</u>  | 0 | 1 | 0 | 1 | 0 | 0 | 1 | 0 | 0 | 1 | 4 |
| <u>CD1C</u>     | 1 | 1 | 0 | 1 | 0 | 0 | 1 | 0 | 0 | 0 | 4 |
| <u>L3MBTL4</u>  | 0 | 1 | 0 | 1 | 0 | 0 | 1 | 0 | 0 | 1 | 4 |
| <u>CD1E</u>     | 1 | 1 | 0 | 1 | 0 | 0 | 0 | 0 | 0 | 1 | 4 |
| <u>MYADM</u>    | 1 | 0 | 0 | 1 | 0 | 0 | 1 | 0 | 0 | 1 | 4 |
| <u>MYADM</u>    | 1 | 1 | 0 | 1 | 0 | 0 | 0 | 0 | 0 | 1 | 4 |
| <u>C14orf43</u> | 1 | 1 | 0 | 1 | 0 | 0 | 0 | 0 | 0 | 1 | 4 |
| <u>CABLES1</u>  | 1 | 1 | 0 | 1 | 0 | 0 | 0 | 0 | 0 | 1 | 4 |
| <u>TTC5</u>     | 1 | 1 | 0 | 1 | 0 | 0 | 1 | 0 | 0 | 0 | 4 |
| <u>SNX29</u>    | 1 | 1 | 0 | 1 | 0 | 0 | 1 | 0 | 0 | 0 | 4 |
| <u>LRRFIP1</u>  | 1 | 0 | 0 | 1 | 0 | 0 | 1 | 0 | 0 | 1 | 4 |
| <u>NOLC1</u>    | 1 | 1 | 0 | 1 | 0 | 0 | 1 | 0 | 0 | 0 | 4 |
| <u>STK17B</u>   | 1 | 1 | 0 | 1 | 0 | 0 | 1 | 0 | 0 | 0 | 4 |
| <u>MED14</u>    | 1 | 1 | 0 | 1 | 0 | 0 | 1 | 0 | 0 | 0 | 4 |
| <u>MS4A1</u>    | 1 | 1 | 0 | 1 | 0 | 0 | 0 | 0 | 0 | 1 | 4 |
| <u>TRIP13</u>   | 1 | 1 | 0 | 1 | 0 | 0 | 1 | 0 | 0 | 0 | 4 |
| <u>CER1</u>     | 1 | 1 | 0 | 1 | 0 | 0 | 1 | 0 | 0 | 0 | 4 |
| <u>MGC16169</u> | 1 | 0 | 0 | 1 | 0 | 0 | 1 | 0 | 0 | 1 | 4 |
| <u>CADPS2</u>   | 1 | 1 | 0 | 1 | 0 | 0 | 0 | 0 | 0 | 1 | 4 |
| <u>CADPS2</u>   | 1 | 0 | 0 | 1 | 0 | 0 | 1 | 0 | 0 | 1 | 4 |
| <u>LIPG</u>     | 1 | 1 | 0 | 1 | 0 | 0 | 1 | 0 | 0 | 0 | 4 |
| <u>ACVRL1</u>   | 1 | 1 | 0 | 1 | 0 | 0 | 0 | 0 | 0 | 1 | 4 |
| <u>ARHGAP29</u> | 1 | 1 | 0 | 1 | 0 | 0 | 1 | 0 | 0 | 0 | 4 |
| <u>SYTL4</u>    | 1 | 1 | 0 | 1 | 0 | 0 | 0 | 0 | 0 | 1 | 4 |
| <u>SYTL4</u>    | 1 | 0 | 0 | 1 | 0 | 0 | 1 | 0 | 0 | 1 | 4 |
| <u>TP53INP1</u> | 1 | 1 | 0 | 1 | 0 | 0 | 1 | 0 | 0 | 0 | 4 |
| <u>CDYL</u>     | 0 | 0 | 0 | 1 | 1 | 1 | 0 | 0 | 0 | 1 | 4 |
| <u>OKI</u>      | 1 | 1 | 0 | 1 | 0 | 0 | 0 | 0 | 0 | 1 | 4 |
| <u>GGPS1</u>    | 1 | 1 | 0 | 1 | 0 | 0 | 0 | 0 | 0 | 1 | 4 |
| <u>GGPS1</u>    | 1 | 0 | 0 | 1 | 0 | 0 | 1 | 0 | 0 | 1 | 4 |
| <u>RASAL2</u>   | 1 | 1 | 0 | 1 | 0 | 0 | 1 | 0 | 0 | 0 | 4 |

|                 |   |   |   |   |   |   |   |   |   |   |   |
|-----------------|---|---|---|---|---|---|---|---|---|---|---|
| <u>GAL3ST1</u>  | 1 | 1 | 0 | 1 | 0 | 0 | 1 | 0 | 0 | 0 | 4 |
| <u>SCAMP1</u>   | 1 | 1 | 0 | 1 | 0 | 0 | 1 | 0 | 0 | 0 | 4 |
| <u>EI24</u>     | 1 | 1 | 0 | 1 | 0 | 0 | 1 | 0 | 0 | 0 | 4 |
| <u>PUNC</u>     | 0 | 1 | 0 | 1 | 0 | 0 | 1 | 0 | 0 | 1 | 4 |
| <u>PREPL</u>    | 1 | 1 | 0 | 1 | 0 | 0 | 1 | 0 | 0 | 0 | 4 |
| <u>AKAP12</u>   | 1 | 1 | 0 | 1 | 0 | 0 | 1 | 0 | 0 | 0 | 4 |
| <u>RNF14</u>    | 1 | 1 | 0 | 1 | 0 | 0 | 0 | 0 | 0 | 1 | 4 |
| <u>RNF7</u>     | 1 | 1 | 0 | 1 | 0 | 0 | 1 | 0 | 0 | 0 | 4 |
| <u>MTL5</u>     | 1 | 1 | 0 | 1 | 0 | 0 | 0 | 0 | 0 | 1 | 4 |
| <u>FNIP1</u>    | 0 | 0 | 1 | 1 | 0 | 0 | 1 | 0 | 0 | 1 | 4 |
| <u>SOCS5</u>    | 1 | 1 | 0 | 1 | 0 | 0 | 0 | 0 | 0 | 1 | 4 |
| <u>SOCS5</u>    | 1 | 0 | 0 | 1 | 0 | 0 | 1 | 0 | 0 | 1 | 4 |
| <u>PDE4DIP</u>  | 0 | 1 | 0 | 1 | 0 | 0 | 1 | 0 | 0 | 1 | 4 |
| <u>SLC25A44</u> | 1 | 1 | 0 | 1 | 0 | 0 | 1 | 0 | 0 | 0 | 4 |
| <u>DEPDC5</u>   | 1 | 0 | 0 | 1 | 0 | 0 | 1 | 0 | 1 | 0 | 4 |
| <u>ACYP1</u>    | 1 | 1 | 0 | 1 | 0 | 0 | 0 | 0 | 0 | 1 | 4 |
| <u>ULK2</u>     | 0 | 1 | 0 | 1 | 0 | 0 | 1 | 0 | 0 | 1 | 4 |
| <u>NOS1AP</u>   | 1 | 1 | 0 | 1 | 0 | 0 | 0 | 0 | 0 | 1 | 4 |
| <u>KIAA0513</u> | 1 | 1 | 0 | 1 | 0 | 0 | 1 | 0 | 0 | 0 | 4 |
| <u>ZFYVE16</u>  | 1 | 1 | 0 | 1 | 0 | 0 | 0 | 0 | 0 | 1 | 4 |
| <u>RASSF2</u>   | 1 | 1 | 0 | 1 | 0 | 0 | 0 | 0 | 0 | 1 | 4 |
| <u>KIAA0232</u> | 1 | 0 | 0 | 1 | 0 | 0 | 1 | 0 | 0 | 1 | 4 |
| <u>MRPL19</u>   | 1 | 1 | 0 | 1 | 0 | 0 | 1 | 0 | 0 | 0 | 4 |
| <u>KIAA0427</u> | 1 | 0 | 0 | 1 | 0 | 0 | 1 | 0 | 0 | 1 | 4 |
| <u>GAB2</u>     | 1 | 1 | 0 | 1 | 0 | 0 | 0 | 0 | 0 | 1 | 4 |
| <u>TMEM24</u>   | 1 | 1 | 0 | 1 | 0 | 0 | 1 | 0 | 0 | 0 | 4 |
| <u>TLK1</u>     | 0 | 0 | 0 | 1 | 0 | 0 | 1 | 0 | 1 | 1 | 4 |
| <u>SUPT7L</u>   | 1 | 1 | 0 | 1 | 0 | 0 | 1 | 0 | 0 | 0 | 4 |
| <u>SEC16A</u>   | 1 | 1 | 0 | 1 | 0 | 0 | 1 | 0 | 0 | 0 | 4 |
| <u>ZBTB40</u>   | 1 | 0 | 0 | 1 | 0 | 0 | 1 | 0 | 0 | 1 | 4 |
| <u>ZBTB40</u>   | 1 | 1 | 0 | 1 | 0 | 0 | 0 | 0 | 0 | 1 | 4 |
| <u>CD302</u>    | 0 | 0 | 1 | 1 | 0 | 0 | 1 | 0 | 0 | 1 | 4 |
| <u>DOPEY2</u>   | 1 | 1 | 0 | 1 | 0 | 0 | 1 | 0 | 0 | 0 | 4 |
| <u>ARPC1B</u>   | 1 | 1 | 0 | 0 | 0 | 0 | 1 | 0 | 0 | 1 | 4 |
| <u>CTDSP2</u>   | 1 | 1 | 0 | 0 | 0 | 0 | 1 | 0 | 0 | 1 | 4 |
| <u>ZNF197</u>   | 1 | 1 | 0 | 0 | 0 | 0 | 1 | 0 | 0 | 1 | 4 |
| <u>USPL1</u>    | 1 | 1 | 0 | 0 | 0 | 0 | 1 | 0 | 0 | 1 | 4 |
| <u>DENND4A</u>  | 1 | 1 | 0 | 0 | 0 | 0 | 0 | 1 | 1 | 0 | 4 |
| <u>STAG1</u>    | 1 | 1 | 0 | 0 | 0 | 0 | 1 | 0 | 0 | 1 | 4 |
| <u>CDX2</u>     | 1 | 1 | 0 | 0 | 0 | 0 | 1 | 0 | 0 | 1 | 4 |
| <u>BAIAP2</u>   | 1 | 0 | 0 | 0 | 1 | 0 | 1 | 0 | 0 | 1 | 4 |

|                |   |   |   |   |   |   |   |   |   |   |   |
|----------------|---|---|---|---|---|---|---|---|---|---|---|
| <u>CREB3</u>   | 1 | 1 | 0 | 0 | 0 | 0 | 1 | 0 | 0 | 1 | 4 |
| <u>PDLIM5</u>  | 1 | 1 | 0 | 0 | 0 | 0 | 1 | 0 | 0 | 1 | 4 |
| <u>CHL1</u>    | 1 | 1 | 0 | 0 | 0 | 0 | 1 | 0 | 0 | 1 | 4 |
| <u>ZNF266</u>  | 1 | 0 | 1 | 0 | 0 | 0 | 1 | 0 | 0 | 1 | 4 |
| <u>ADCY2</u>   | 1 | 1 | 0 | 0 | 0 | 0 | 1 | 0 | 0 | 1 | 4 |
| <u>C7orf16</u> | 1 | 1 | 0 | 0 | 0 | 0 | 1 | 0 | 0 | 1 | 4 |
| <u>HNRNPA0</u> | 1 | 1 | 0 | 0 | 0 | 0 | 1 | 0 | 0 | 1 | 4 |
| <u>STMN2</u>   | 1 | 1 | 0 | 0 | 0 | 0 | 1 | 0 | 0 | 1 | 4 |
| <u>DIDO1</u>   | 1 | 1 | 0 | 0 | 0 | 0 | 1 | 0 | 0 | 1 | 4 |
| <u>RASSF1</u>  | 1 | 1 | 0 | 0 | 0 | 0 | 1 | 0 | 0 | 1 | 4 |
| <u>CHN1</u>    | 1 | 1 | 0 | 0 | 1 | 0 | 1 | 0 | 0 | 0 | 4 |
| <u>CHN2</u>    | 1 | 1 | 0 | 0 | 1 | 0 | 1 | 0 | 0 | 0 | 4 |
| <u>CASC4</u>   | 1 | 1 | 0 | 0 | 0 | 0 | 1 | 0 | 0 | 1 | 4 |
| <u>SLC2A13</u> | 1 | 1 | 0 | 0 | 0 | 0 | 1 | 0 | 0 | 1 | 4 |
| <u>IL22RA2</u> | 1 | 1 | 0 | 0 | 0 | 0 | 1 | 0 | 0 | 1 | 4 |
| <u>TDRD9</u>   | 1 | 1 | 0 | 0 | 0 | 0 | 1 | 0 | 1 | 0 | 4 |
| <u>COL4A1</u>  | 1 | 1 | 0 | 0 | 0 | 0 | 1 | 0 | 0 | 1 | 4 |
| <u>RNF183</u>  | 1 | 1 | 0 | 0 | 0 | 0 | 1 | 0 | 0 | 1 | 4 |
| <u>CSNK1G3</u> | 1 | 1 | 0 | 0 | 0 | 0 | 1 | 0 | 0 | 1 | 4 |
| <u>RC3H1</u>   | 1 | 1 | 0 | 0 | 0 | 0 | 1 | 0 | 0 | 1 | 4 |
| <u>ZSWIM2</u>  | 1 | 1 | 0 | 0 | 0 | 0 | 1 | 0 | 0 | 1 | 4 |
| <u>ZXDB</u>    | 1 | 1 | 0 | 0 | 0 | 0 | 1 | 0 | 0 | 1 | 4 |
| <u>CDC20B</u>  | 1 | 1 | 0 | 0 | 0 | 0 | 1 | 0 | 0 | 1 | 4 |
| <u>C9orf71</u> | 1 | 1 | 0 | 0 | 0 | 0 | 1 | 0 | 0 | 1 | 4 |
| <u>DLD</u>     | 1 | 1 | 0 | 0 | 0 | 0 | 1 | 0 | 0 | 1 | 4 |
| <u>EDG3</u>    | 1 | 1 | 0 | 0 | 0 | 0 | 1 | 0 | 0 | 1 | 4 |
| <u>EVI2A</u>   | 1 | 0 | 1 | 0 | 0 | 0 | 1 | 0 | 0 | 1 | 4 |
| <u>FBN1</u>    | 1 | 1 | 0 | 0 | 0 | 0 | 1 | 0 | 0 | 1 | 4 |
| <u>FGF12</u>   | 1 | 1 | 0 | 0 | 0 | 0 | 1 | 0 | 0 | 1 | 4 |
| <u>LMTK2</u>   | 1 | 1 | 0 | 0 | 0 | 0 | 1 | 0 | 0 | 1 | 4 |
| <u>SLITRK3</u> | 1 | 1 | 0 | 0 | 1 | 0 | 1 | 0 | 0 | 0 | 4 |
| <u>ZNF510</u>  | 1 | 1 | 0 | 0 | 0 | 0 | 1 | 0 | 0 | 1 | 4 |
| <u>BTBD3</u>   | 1 | 0 | 0 | 0 | 1 | 1 | 0 | 0 | 0 | 1 | 4 |
| <u>SACM1L</u>  | 1 | 1 | 0 | 0 | 0 | 0 | 1 | 0 | 0 | 1 | 4 |
| <u>GOLGA8A</u> | 1 | 1 | 0 | 0 | 0 | 0 | 1 | 0 | 0 | 1 | 4 |
| <u>ZNF292</u>  | 1 | 1 | 0 | 0 | 0 | 0 | 1 | 0 | 0 | 1 | 4 |
| <u>WAPAL</u>   | 1 | 1 | 0 | 0 | 0 | 0 | 1 | 0 | 0 | 1 | 4 |
| <u>SARM1</u>   | 1 | 1 | 0 | 0 | 0 | 0 | 1 | 0 | 0 | 1 | 4 |
| <u>TNRC6B</u>  | 1 | 0 | 1 | 0 | 0 | 0 | 1 | 0 | 0 | 1 | 4 |
| <u>ZCCHC14</u> | 1 | 1 | 0 | 0 | 0 | 0 | 1 | 0 | 0 | 1 | 4 |
| <u>RFTN1</u>   | 1 | 1 | 0 | 0 | 0 | 0 | 1 | 1 | 0 | 0 | 4 |

|                    |   |   |   |   |   |   |   |   |   |   |   |
|--------------------|---|---|---|---|---|---|---|---|---|---|---|
| <u>LARP5</u>       | 1 | 1 | 0 | 0 | 0 | 0 | 1 | 0 | 0 | 1 | 4 |
| <u>OTUD3</u>       | 1 | 1 | 0 | 0 | 0 | 0 | 1 | 0 | 0 | 1 | 4 |
| <u>CRB1</u>        | 1 | 1 | 0 | 0 | 0 | 0 | 1 | 0 | 0 | 1 | 4 |
| <u>AP4E1</u>       | 1 | 1 | 0 | 0 | 0 | 0 | 1 | 0 | 0 | 1 | 4 |
| <u>SF3B1</u>       | 1 | 1 | 0 | 0 | 1 | 0 | 1 | 0 | 0 | 0 | 4 |
| <u>RABGAP1</u>     | 1 | 1 | 0 | 0 | 0 | 0 | 1 | 0 | 0 | 1 | 4 |
| <u>SCML4</u>       | 1 | 1 | 0 | 0 | 0 | 0 | 1 | 0 | 0 | 1 | 4 |
| <u>KLHL3</u>       | 1 | 1 | 0 | 0 | 0 | 0 | 1 | 0 | 0 | 1 | 4 |
| <u>CNNM1</u>       | 1 | 1 | 0 | 0 | 0 | 0 | 1 | 1 | 0 | 0 | 4 |
| <u>NPTN</u>        | 1 | 0 | 0 | 0 | 1 | 1 | 0 | 0 | 0 | 1 | 4 |
| <u>ZBTB11</u>      | 1 | 1 | 0 | 0 | 0 | 0 | 1 | 0 | 0 | 1 | 4 |
| <u>AFF4</u>        | 1 | 1 | 0 | 0 | 0 | 0 | 1 | 0 | 0 | 1 | 4 |
| <u>SNX5</u>        | 1 | 0 | 1 | 0 | 0 | 0 | 1 | 0 | 0 | 1 | 4 |
| <u>ANGPT1</u>      | 1 | 1 | 0 | 0 | 0 | 0 | 1 | 0 | 0 | 1 | 4 |
| <u>TPRG1</u>       | 1 | 1 | 0 | 0 | 0 | 0 | 1 | 0 | 0 | 1 | 4 |
| <u>FRYL</u>        | 1 | 1 | 0 | 0 | 0 | 0 | 1 | 0 | 0 | 1 | 4 |
| <u>TUSC5</u>       | 1 | 1 | 0 | 0 | 0 | 0 | 1 | 0 | 0 | 1 | 4 |
| <u>GYS2</u>        | 1 | 1 | 0 | 0 | 0 | 0 | 1 | 0 | 0 | 1 | 4 |
| <u>ERO1L</u>       | 1 | 1 | 0 | 0 | 0 | 0 | 1 | 0 | 0 | 1 | 4 |
| <u>HSF2</u>        | 1 | 1 | 0 | 0 | 0 | 0 | 1 | 0 | 0 | 1 | 4 |
| <u>HSP90AB1</u>    | 1 | 0 | 0 | 0 | 0 | 0 | 1 | 1 | 1 | 0 | 4 |
| <u>LUZP2</u>       | 1 | 1 | 0 | 0 | 0 | 0 | 1 | 0 | 0 | 1 | 4 |
| <u>IFNAR1</u>      | 1 | 1 | 0 | 0 | 0 | 0 | 1 | 1 | 0 | 0 | 4 |
| <u>IGFBP4</u>      | 1 | 1 | 0 | 0 | 0 | 0 | 1 | 0 | 0 | 1 | 4 |
| <u>IL2RB</u>       | 1 | 1 | 0 | 0 | 0 | 0 | 1 | 0 | 0 | 1 | 4 |
| <u>KCNC2</u>       | 1 | 1 | 0 | 0 | 0 | 0 | 1 | 0 | 0 | 1 | 4 |
| <u>KCNS2</u>       | 1 | 1 | 0 | 0 | 0 | 0 | 1 | 0 | 0 | 1 | 4 |
| <u>hCG_1985469</u> | 1 | 1 | 0 | 0 | 0 | 0 | 1 | 0 | 0 | 1 | 4 |
| <u>LY75</u>        | 1 | 1 | 0 | 0 | 0 | 0 | 1 | 0 | 0 | 1 | 4 |
| <u>SMAD3</u>       | 1 | 1 | 0 | 0 | 0 | 0 | 1 | 0 | 0 | 1 | 4 |
| <u>MTR</u>         | 1 | 1 | 0 | 0 | 0 | 0 | 1 | 0 | 0 | 1 | 4 |
| <u>NEFH</u>        | 1 | 1 | 0 | 0 | 0 | 0 | 1 | 0 | 0 | 1 | 4 |
| <u>NRCAM</u>       | 1 | 1 | 0 | 0 | 0 | 0 | 1 | 0 | 0 | 1 | 4 |
| <u>PAM</u>         | 1 | 0 | 0 | 0 | 1 | 1 | 0 | 0 | 0 | 1 | 4 |
| <u>F11R</u>        | 1 | 1 | 0 | 0 | 0 | 0 | 1 | 0 | 0 | 1 | 4 |
| <u>TRAT1</u>       | 1 | 1 | 0 | 0 | 0 | 0 | 1 | 0 | 0 | 1 | 4 |
| <u>NIN</u>         | 1 | 1 | 0 | 0 | 0 | 0 | 1 | 0 | 0 | 1 | 4 |
| <u>HEMK1</u>       | 1 | 1 | 0 | 0 | 0 | 0 | 1 | 0 | 0 | 1 | 4 |
| <u>PIGA</u>        | 1 | 1 | 0 | 0 | 0 | 0 | 1 | 0 | 0 | 1 | 4 |
| <u>C21orf91</u>    | 1 | 1 | 0 | 0 | 0 | 0 | 1 | 0 | 0 | 1 | 4 |
| <u>NDFIP2</u>      | 1 | 1 | 0 | 0 | 0 | 0 | 1 | 0 | 0 | 1 | 4 |



|                 |   |   |   |   |   |   |   |   |   |   |   |
|-----------------|---|---|---|---|---|---|---|---|---|---|---|
| PPA1            | 1 | 1 | 0 | 0 | 0 | 0 | 1 | 0 | 1 | 0 | 4 |
| TET2            | 1 | 1 | 0 | 0 | 0 | 0 | 0 | 1 | 0 | 1 | 4 |
| FBXO34          | 1 | 0 | 1 | 0 | 0 | 0 | 1 | 0 | 0 | 1 | 4 |
| SRGN            | 1 | 1 | 0 | 0 | 0 | 0 | 1 | 0 | 0 | 1 | 4 |
| DDEFL1          | 1 | 1 | 0 | 0 | 0 | 0 | 1 | 0 | 0 | 1 | 4 |
| KIAA1333        | 1 | 1 | 0 | 0 | 0 | 0 | 1 | 0 | 0 | 1 | 4 |
| LMBRD1          | 1 | 1 | 0 | 0 | 0 | 0 | 1 | 0 | 1 | 0 | 4 |
| MBNL3           | 1 | 1 | 0 | 0 | 0 | 0 | 1 | 0 | 0 | 1 | 4 |
| KIAA1217        | 1 | 1 | 0 | 0 | 0 | 0 | 1 | 0 | 0 | 1 | 4 |
| CCBL2           | 1 | 1 | 0 | 0 | 1 | 0 | 1 | 0 | 0 | 0 | 4 |
| GPR126          | 1 | 1 | 0 | 0 | 0 | 0 | 1 | 0 | 0 | 1 | 4 |
| SERINC1         | 1 | 1 | 0 | 0 | 0 | 0 | 1 | 0 | 0 | 1 | 4 |
| ALPK3           | 1 | 1 | 0 | 0 | 0 | 0 | 1 | 0 | 0 | 1 | 4 |
| KIAA1522        | 1 | 1 | 0 | 0 | 0 | 0 | 1 | 1 | 0 | 0 | 4 |
| PEX19           | 1 | 1 | 0 | 0 | 0 | 0 | 1 | 0 | 0 | 1 | 4 |
| QDPR            | 1 | 1 | 0 | 0 | 0 | 0 | 1 | 0 | 0 | 1 | 4 |
| MRPL12          | 1 | 1 | 0 | 0 | 0 | 0 | 1 | 0 | 0 | 1 | 4 |
| SORT1           | 1 | 1 | 0 | 0 | 0 | 0 | 1 | 0 | 0 | 1 | 4 |
| ELTD1           | 1 | 1 | 0 | 0 | 0 | 0 | 1 | 0 | 0 | 1 | 4 |
| SGCB            | 1 | 1 | 0 | 0 | 0 | 0 | 1 | 0 | 0 | 1 | 4 |
| DDX31           | 1 | 1 | 0 | 0 | 0 | 0 | 1 | 0 | 0 | 1 | 4 |
| RFXDC2          | 1 | 1 | 0 | 0 | 0 | 0 | 1 | 0 | 0 | 1 | 4 |
| LEFTY2          | 1 | 1 | 0 | 0 | 0 | 0 | 1 | 0 | 0 | 1 | 4 |
| TTF1            | 1 | 1 | 0 | 0 | 0 | 0 | 1 | 0 | 0 | 1 | 4 |
| VLDLR           | 1 | 1 | 0 | 0 | 0 | 0 | 1 | 0 | 1 | 0 | 4 |
| DEK             | 1 | 1 | 0 | 0 | 0 | 0 | 1 | 0 | 0 | 1 | 4 |
| MCPH1           | 1 | 1 | 0 | 0 | 0 | 0 | 1 | 0 | 0 | 1 | 4 |
| ASRGL1          | 1 | 1 | 0 | 0 | 0 | 0 | 1 | 0 | 0 | 1 | 4 |
| CUL5            | 1 | 1 | 0 | 0 | 0 | 0 | 1 | 0 | 0 | 1 | 4 |
| KBTBD7          | 1 | 1 | 0 | 0 | 0 | 0 | 1 | 0 | 0 | 1 | 4 |
| ZIC4            | 1 | 1 | 0 | 0 | 0 | 0 | 1 | 0 | 0 | 1 | 4 |
| EEA1            | 1 | 1 | 0 | 0 | 0 | 0 | 1 | 0 | 0 | 1 | 4 |
| SLITRK2         | 1 | 0 | 0 | 0 | 1 | 0 | 1 | 0 | 0 | 1 | 4 |
| BEX2            | 1 | 1 | 0 | 0 | 0 | 0 | 1 | 0 | 0 | 1 | 4 |
| PLXDC2          | 1 | 1 | 0 | 0 | 0 | 0 | 1 | 0 | 1 | 0 | 4 |
| SLC43A1         | 1 | 1 | 0 | 0 | 0 | 0 | 1 | 0 | 0 | 1 | 4 |
| LL22NC03-75B3.6 | 1 | 1 | 0 | 0 | 0 | 0 | 1 | 0 | 0 | 1 | 4 |
| MADD            | 1 | 1 | 0 | 0 | 0 | 0 | 1 | 0 | 0 | 1 | 4 |
| ACTL6A          | 1 | 1 | 0 | 0 | 1 | 0 | 0 | 0 | 0 | 1 | 4 |
| TNFSF11         | 1 | 0 | 0 | 0 | 1 | 0 | 1 | 0 | 0 | 1 | 4 |

|                 |   |   |   |   |   |   |   |   |   |   |   |
|-----------------|---|---|---|---|---|---|---|---|---|---|---|
| <u>CRADD</u>    | 1 | 1 | 0 | 0 | 0 | 0 | 1 | 0 | 0 | 1 | 4 |
| <u>ACTN2</u>    | 1 | 1 | 0 | 0 | 0 | 0 | 1 | 0 | 0 | 1 | 4 |
| <u>IL18R1</u>   | 1 | 1 | 0 | 0 | 0 | 0 | 1 | 0 | 0 | 1 | 4 |
| <u>VNN2</u>     | 1 | 1 | 0 | 0 | 0 | 0 | 1 | 0 | 0 | 1 | 4 |
| <u>KRIT1</u>    | 1 | 0 | 1 | 0 | 0 | 0 | 1 | 0 | 0 | 1 | 4 |
| <u>TMEM116</u>  | 1 | 1 | 0 | 0 | 0 | 0 | 1 | 0 | 0 | 1 | 4 |
| <u>ZNF468</u>   | 1 | 0 | 1 | 0 | 0 | 0 | 1 | 0 | 0 | 1 | 4 |
| <u>STARD13</u>  | 1 | 1 | 1 | 0 | 0 | 0 | 1 | 0 | 0 | 0 | 4 |
| <u>TMSB4Y</u>   | 1 | 1 | 0 | 0 | 0 | 0 | 1 | 0 | 0 | 1 | 4 |
| <u>MTMR7</u>    | 1 | 1 | 0 | 0 | 0 | 0 | 1 | 0 | 0 | 1 | 4 |
| <u>DGKI</u>     | 1 | 1 | 0 | 0 | 0 | 0 | 1 | 0 | 0 | 1 | 4 |
| <u>DSEL</u>     | 1 | 1 | 0 | 0 | 0 | 0 | 1 | 0 | 0 | 1 | 4 |
| <u>LRAT</u>     | 1 | 1 | 0 | 0 | 0 | 0 | 1 | 0 | 0 | 1 | 4 |
| <u>CACNA2D2</u> | 1 | 1 | 0 | 0 | 1 | 0 | 0 | 0 | 0 | 1 | 4 |
| <u>CD163</u>    | 1 | 1 | 0 | 0 | 1 | 0 | 0 | 0 | 0 | 1 | 4 |
| <u>HOMER2</u>   | 1 | 1 | 0 | 0 | 0 | 0 | 1 | 0 | 0 | 1 | 4 |
| <u>SLC25A27</u> | 1 | 1 | 0 | 0 | 0 | 0 | 1 | 0 | 0 | 1 | 4 |
| <u>PMPCB</u>    | 1 | 1 | 0 | 0 | 0 | 0 | 1 | 0 | 0 | 1 | 4 |
| <u>UBE3C</u>    | 1 | 1 | 0 | 0 | 0 | 0 | 1 | 0 | 0 | 1 | 4 |
| <u>PUM1</u>     | 1 | 1 | 0 | 0 | 0 | 0 | 1 | 0 | 0 | 1 | 4 |
| <u>PUM1</u>     | 1 | 0 | 0 | 0 | 1 | 1 | 0 | 0 | 0 | 1 | 4 |
| <u>KIAA0152</u> | 1 | 1 | 0 | 0 | 0 | 0 | 1 | 0 | 0 | 1 | 4 |
| <u>KCNE2</u>    | 1 | 1 | 0 | 0 | 0 | 0 | 1 | 0 | 0 | 1 | 4 |
| <u>NAALAD2</u>  | 0 | 1 | 0 | 0 | 0 | 0 | 1 | 0 | 1 | 1 | 4 |
| <u>SMNDC1</u>   | 0 | 1 | 0 | 0 | 0 | 0 | 1 | 0 | 1 | 1 | 4 |
| <u>HEXIM1</u>   | 0 | 1 | 0 | 0 | 0 | 0 | 1 | 1 | 0 | 1 | 4 |
| <u>RALBP1</u>   | 0 | 1 | 0 | 0 | 0 | 0 | 1 | 0 | 1 | 1 | 4 |
| <u>ATF7</u>     | 0 | 1 | 0 | 0 | 0 | 0 | 1 | 0 | 1 | 1 | 4 |
| <u>DUSP10</u>   | 0 | 1 | 0 | 0 | 0 | 0 | 1 | 0 | 1 | 1 | 4 |
| <u>CYP2U1</u>   | 0 | 1 | 0 | 0 | 0 | 0 | 1 | 1 | 0 | 1 | 4 |
| <u>SLFN5</u>    | 0 | 1 | 0 | 0 | 0 | 0 | 1 | 1 | 0 | 1 | 4 |
| <u>DUSP6</u>    | 0 | 1 | 0 | 0 | 0 | 0 | 1 | 0 | 1 | 1 | 4 |
| <u>EGR2</u>     | 0 | 1 | 0 | 0 | 0 | 0 | 1 | 0 | 1 | 1 | 4 |
| <u>EIF5</u>     | 0 | 1 | 0 | 0 | 0 | 0 | 1 | 1 | 0 | 1 | 4 |
| <u>PLD5</u>     | 0 | 1 | 0 | 0 | 0 | 0 | 1 | 0 | 1 | 1 | 4 |
| <u>PXT1</u>     | 0 | 1 | 0 | 0 | 0 | 0 | 1 | 1 | 0 | 1 | 4 |
| <u>FGF2</u>     | 0 | 1 | 0 | 0 | 0 | 0 | 1 | 1 | 0 | 1 | 4 |
| <u>FGFR2</u>    | 0 | 1 | 0 | 0 | 0 | 0 | 1 | 0 | 1 | 1 | 4 |
| <u>ELL2</u>     | 0 | 1 | 0 | 0 | 0 | 0 | 1 | 1 | 0 | 1 | 4 |
| <u>FLII</u>     | 0 | 1 | 0 | 0 | 0 | 0 | 1 | 0 | 1 | 1 | 4 |
| <u>MOBKL3</u>   | 0 | 1 | 0 | 0 | 0 | 0 | 1 | 0 | 1 | 1 | 4 |

|          |   |   |   |   |   |   |   |   |   |   |   |
|----------|---|---|---|---|---|---|---|---|---|---|---|
| ZNF521   | 0 | 1 | 0 | 0 | 0 | 0 | 1 | 1 | 1 | 0 | 4 |
| FAM44A   | 0 | 1 | 0 | 0 | 1 | 0 | 1 | 0 | 0 | 1 | 4 |
| ULK3     | 0 | 1 | 0 | 0 | 0 | 0 | 1 | 1 | 0 | 1 | 4 |
| HNRPK    | 0 | 1 | 0 | 0 | 0 | 0 | 1 | 0 | 1 | 1 | 4 |
| ARF3     | 0 | 1 | 0 | 0 | 0 | 0 | 1 | 1 | 0 | 1 | 4 |
| LASPI    | 0 | 1 | 0 | 0 | 0 | 0 | 1 | 1 | 0 | 1 | 4 |
| FLJ40142 | 0 | 1 | 0 | 0 | 0 | 0 | 1 | 1 | 0 | 1 | 4 |
| LPL      | 0 | 1 | 0 | 0 | 0 | 0 | 1 | 1 | 1 | 0 | 4 |
| MGAT2    | 0 | 1 | 0 | 0 | 0 | 0 | 1 | 0 | 1 | 1 | 4 |
| ACLY     | 0 | 1 | 0 | 0 | 0 | 0 | 1 | 0 | 1 | 1 | 4 |
| NFYA     | 0 | 1 | 0 | 0 | 0 | 0 | 1 | 1 | 0 | 1 | 4 |
| FBXO40   | 0 | 1 | 0 | 0 | 0 | 0 | 1 | 1 | 0 | 1 | 4 |
| PLCG1    | 0 | 1 | 0 | 0 | 0 | 0 | 1 | 0 | 1 | 1 | 4 |
| VPS37C   | 0 | 1 | 0 | 0 | 0 | 0 | 1 | 1 | 0 | 1 | 4 |
| TMEM9B   | 0 | 1 | 0 | 0 | 0 | 0 | 1 | 0 | 1 | 1 | 4 |
| ACTR3B   | 0 | 1 | 0 | 0 | 0 | 0 | 1 | 1 | 1 | 0 | 4 |
| FAM80B   | 0 | 1 | 0 | 0 | 0 | 0 | 1 | 0 | 1 | 1 | 4 |
| STIM2    | 0 | 1 | 0 | 0 | 0 | 0 | 1 | 1 | 0 | 1 | 4 |
| OBFC2A   | 0 | 1 | 0 | 0 | 0 | 0 | 1 | 1 | 0 | 1 | 4 |
| TLL2     | 0 | 1 | 0 | 0 | 0 | 0 | 1 | 1 | 0 | 1 | 4 |
| MORC4    | 0 | 1 | 0 | 0 | 0 | 0 | 1 | 0 | 1 | 1 | 4 |
| TMEFF1   | 0 | 1 | 0 | 0 | 0 | 0 | 1 | 0 | 1 | 1 | 4 |
| SUCLA2   | 0 | 1 | 0 | 0 | 0 | 0 | 1 | 0 | 1 | 1 | 4 |
| C9orf30  | 0 | 1 | 0 | 0 | 0 | 0 | 1 | 0 | 1 | 1 | 4 |
| NOG      | 0 | 1 | 0 | 0 | 0 | 0 | 1 | 0 | 1 | 1 | 4 |
| SCARB2   | 0 | 1 | 0 | 0 | 0 | 0 | 1 | 1 | 0 | 1 | 4 |
| FAM131B  | 0 | 1 | 0 | 0 | 0 | 0 | 1 | 1 | 0 | 1 | 4 |
| FANCD2   | 0 | 0 | 0 | 0 | 0 | 0 | 1 | 1 | 1 | 1 | 4 |
| ABI1     | 1 | 0 | 0 | 1 | 0 | 0 | 0 | 0 | 0 | 1 | 3 |
| ABI1     | 1 | 0 | 0 | 1 | 0 | 0 | 0 | 0 | 0 | 1 | 3 |
| ABI1     | 1 | 0 | 0 | 1 | 0 | 0 | 0 | 0 | 0 | 1 | 3 |
| GNPDA1   | 1 | 1 | 0 | 1 | 0 | 0 | 0 | 0 | 0 | 0 | 3 |
| PDCD6IP  | 1 | 0 | 0 | 1 | 0 | 0 | 0 | 0 | 0 | 1 | 3 |
| SMC4     | 1 | 1 | 0 | 1 | 0 | 0 | 0 | 0 | 0 | 0 | 3 |
| GJC1     | 1 | 0 | 0 | 1 | 0 | 0 | 0 | 0 | 0 | 1 | 3 |
| RWDD2B   | 1 | 1 | 0 | 1 | 0 | 0 | 0 | 0 | 0 | 0 | 3 |
| ACTR2    | 1 | 0 | 0 | 1 | 0 | 0 | 0 | 0 | 0 | 1 | 3 |
| SGK2     | 1 | 1 | 0 | 1 | 0 | 0 | 0 | 0 | 0 | 0 | 3 |
| ARL4C    | 1 | 1 | 0 | 1 | 0 | 0 | 0 | 0 | 0 | 0 | 3 |
| FAM13A1  | 1 | 0 | 0 | 1 | 0 | 0 | 0 | 0 | 0 | 1 | 3 |
| G3BP1    | 1 | 1 | 0 | 1 | 0 | 0 | 0 | 0 | 0 | 0 | 3 |

|                 |   |   |   |   |   |   |   |   |   |   |   |
|-----------------|---|---|---|---|---|---|---|---|---|---|---|
| <u>GPR64</u>    | 1 | 0 | 0 | 1 | 0 | 0 | 0 | 0 | 0 | 1 | 3 |
| <u>GPR64</u>    | 1 | 0 | 0 | 1 | 0 | 0 | 0 | 0 | 0 | 1 | 3 |
| <u>GPR64</u>    | 1 | 0 | 0 | 1 | 0 | 0 | 0 | 0 | 0 | 1 | 3 |
| <u>AASS</u>     | 0 | 1 | 0 | 1 | 0 | 0 | 0 | 0 | 0 | 1 | 3 |
| <u>DHRS9</u>    | 1 | 0 | 0 | 1 | 0 | 0 | 0 | 0 | 0 | 1 | 3 |
| <u>DHRS9</u>    | 1 | 0 | 0 | 1 | 0 | 0 | 0 | 0 | 0 | 1 | 3 |
| <u>NME6</u>     | 1 | 1 | 0 | 1 | 0 | 0 | 0 | 0 | 0 | 0 | 3 |
| <u>TRIM13</u>   | 1 | 1 | 0 | 1 | 0 | 0 | 0 | 0 | 0 | 0 | 3 |
| <u>EIF1</u>     | 1 | 1 | 0 | 1 | 0 | 0 | 0 | 0 | 0 | 0 | 3 |
| <u>CDK6</u>     | 1 | 0 | 0 | 1 | 0 | 0 | 0 | 0 | 0 | 1 | 3 |
| <u>AP3S2</u>    | 1 | 0 | 0 | 1 | 0 | 0 | 0 | 0 | 0 | 1 | 3 |
| <u>KCNMB2</u>   | 1 | 0 | 0 | 1 | 0 | 0 | 0 | 0 | 0 | 1 | 3 |
| <u>GLYAT</u>    | 1 | 1 | 0 | 1 | 0 | 0 | 0 | 0 | 0 | 0 | 3 |
| <u>EFS</u>      | 1 | 0 | 0 | 1 | 0 | 0 | 0 | 0 | 0 | 1 | 3 |
| <u>BET1</u>     | 0 | 1 | 0 | 1 | 0 | 0 | 0 | 0 | 0 | 1 | 3 |
| <u>PAK4</u>     | 1 | 0 | 0 | 1 | 0 | 0 | 0 | 0 | 0 | 1 | 3 |
| <u>ADAR</u>     | 1 | 0 | 0 | 1 | 0 | 0 | 0 | 0 | 0 | 1 | 3 |
| <u>ADAR</u>     | 1 | 0 | 0 | 1 | 0 | 0 | 0 | 0 | 0 | 1 | 3 |
| <u>ADAR</u>     | 1 | 0 | 0 | 1 | 0 | 0 | 0 | 0 | 0 | 1 | 3 |
| <u>B3GALT5</u>  | 0 | 1 | 0 | 1 | 0 | 0 | 0 | 0 | 0 | 1 | 3 |
| <u>B3GALT5</u>  | 1 | 0 | 0 | 1 | 0 | 0 | 0 | 0 | 0 | 1 | 3 |
| <u>COX4NB</u>   | 1 | 1 | 0 | 1 | 0 | 0 | 0 | 0 | 0 | 0 | 3 |
| <u>CDKN3</u>    | 1 | 0 | 0 | 1 | 0 | 0 | 0 | 0 | 0 | 1 | 3 |
| <u>DLC1</u>     | 1 | 0 | 0 | 1 | 0 | 0 | 0 | 0 | 0 | 1 | 3 |
| <u>ATP8A1</u>   | 1 | 0 | 0 | 1 | 0 | 0 | 0 | 0 | 0 | 1 | 3 |
| <u>ADARB1</u>   | 1 | 0 | 0 | 1 | 0 | 0 | 0 | 0 | 0 | 1 | 3 |
| <u>SEC24B</u>   | 1 | 1 | 0 | 1 | 0 | 0 | 0 | 0 | 0 | 0 | 3 |
| <u>VAV3</u>     | 1 | 1 | 0 | 1 | 0 | 0 | 0 | 0 | 0 | 0 | 3 |
| <u>CAP1</u>     | 1 | 1 | 0 | 1 | 0 | 0 | 0 | 0 | 0 | 0 | 3 |
| <u>STK25</u>    | 1 | 1 | 0 | 1 | 0 | 0 | 0 | 0 | 0 | 0 | 3 |
| <u>ENOX2</u>    | 1 | 0 | 0 | 1 | 0 | 0 | 0 | 0 | 0 | 1 | 3 |
| <u>CEBPA</u>    | 0 | 1 | 0 | 1 | 0 | 0 | 0 | 0 | 0 | 1 | 3 |
| <u>HYOU1</u>    | 1 | 0 | 0 | 1 | 0 | 0 | 0 | 0 | 0 | 1 | 3 |
| <u>NEBL</u>     | 1 | 0 | 0 | 1 | 0 | 0 | 0 | 0 | 0 | 1 | 3 |
| <u>ARPC1A</u>   | 0 | 1 | 0 | 1 | 0 | 0 | 0 | 0 | 0 | 1 | 3 |
| <u>PDLIM5</u>   | 1 | 0 | 0 | 1 | 0 | 0 | 0 | 0 | 0 | 1 | 3 |
| <u>TRIM3</u>    | 1 | 0 | 0 | 1 | 0 | 0 | 0 | 0 | 0 | 1 | 3 |
| <u>ERLIN1</u>   | 1 | 1 | 0 | 1 | 0 | 0 | 0 | 0 | 0 | 0 | 3 |
| <u>RAD51AP1</u> | 1 | 1 | 0 | 1 | 0 | 0 | 0 | 0 | 0 | 0 | 3 |
| <u>IGF2BP2</u>  | 1 | 0 | 0 | 1 | 0 | 0 | 0 | 0 | 0 | 1 | 3 |
| <u>YKT6</u>     | 1 | 1 | 0 | 1 | 0 | 0 | 0 | 0 | 0 | 0 | 3 |

|                |   |   |   |   |   |   |   |   |   |   |   |
|----------------|---|---|---|---|---|---|---|---|---|---|---|
| <u>CUGBP2</u>  | 1 | 0 | 0 | 1 | 0 | 0 | 0 | 0 | 0 | 1 | 3 |
| <u>CUGBP2</u>  | 1 | 0 | 0 | 1 | 0 | 0 | 0 | 0 | 0 | 1 | 3 |
| <u>PNMA2</u>   | 0 | 1 | 0 | 1 | 0 | 0 | 0 | 0 | 0 | 1 | 3 |
| <u>CFL1</u>    | 1 | 1 | 0 | 1 | 0 | 0 | 0 | 0 | 0 | 0 | 3 |
| <u>NFAT5</u>   | 1 | 0 | 0 | 1 | 0 | 0 | 0 | 0 | 0 | 1 | 3 |
| <u>CFL2</u>    | 1 | 0 | 0 | 1 | 0 | 0 | 0 | 0 | 0 | 1 | 3 |
| <u>CTSC</u>    | 0 | 1 | 0 | 1 | 0 | 0 | 0 | 0 | 0 | 1 | 3 |
| <u>CTSC</u>    | 0 | 1 | 0 | 1 | 0 | 0 | 0 | 0 | 0 | 1 | 3 |
| <u>NUP50</u>   | 1 | 0 | 0 | 1 | 0 | 0 | 0 | 0 | 0 | 1 | 3 |
| <u>ZMYND11</u> | 1 | 0 | 0 | 1 | 0 | 0 | 0 | 0 | 0 | 1 | 3 |
| <u>GJB6</u>    | 1 | 0 | 0 | 1 | 0 | 0 | 0 | 0 | 0 | 1 | 3 |
| <u>GJB6</u>    | 1 | 0 | 0 | 1 | 0 | 0 | 0 | 0 | 0 | 1 | 3 |
| <u>FRS2</u>    | 1 | 0 | 0 | 1 | 0 | 0 | 0 | 0 | 0 | 1 | 3 |
| <u>C5orf3</u>  | 1 | 1 | 0 | 1 | 0 | 0 | 0 | 0 | 0 | 0 | 3 |
| <u>PDE10A</u>  | 1 | 0 | 0 | 1 | 0 | 0 | 0 | 0 | 0 | 1 | 3 |
| <u>NPFFR2</u>  | 1 | 0 | 0 | 1 | 0 | 0 | 0 | 0 | 0 | 1 | 3 |
| <u>MALT1</u>   | 1 | 0 | 0 | 1 | 0 | 0 | 0 | 0 | 0 | 1 | 3 |
| <u>TCERG1</u>  | 1 | 0 | 0 | 1 | 0 | 0 | 0 | 0 | 0 | 1 | 3 |
| <u>SUB1</u>    | 1 | 1 | 0 | 1 | 0 | 0 | 0 | 0 | 0 | 0 | 3 |
| <u>PRDX3</u>   | 1 | 0 | 0 | 1 | 0 | 0 | 0 | 0 | 0 | 1 | 3 |
| <u>MSL3L1</u>  | 1 | 1 | 0 | 1 | 0 | 0 | 0 | 0 | 0 | 0 | 3 |
| <u>IFI44L</u>  | 0 | 1 | 0 | 1 | 0 | 0 | 0 | 0 | 0 | 1 | 3 |
| <u>UOCR</u>    | 1 | 1 | 0 | 1 | 0 | 0 | 0 | 0 | 0 | 0 | 3 |
| <u>GCN1L1</u>  | 1 | 1 | 0 | 1 | 0 | 0 | 0 | 0 | 0 | 0 | 3 |
| <u>TLK2</u>    | 1 | 0 | 0 | 1 | 0 | 0 | 0 | 0 | 0 | 1 | 3 |
| <u>LILRB3</u>  | 0 | 1 | 0 | 1 | 0 | 0 | 0 | 0 | 0 | 1 | 3 |
| <u>CPSF6</u>   | 0 | 1 | 0 | 1 | 0 | 0 | 0 | 0 | 0 | 1 | 3 |
| <u>CHD2</u>    | 0 | 1 | 0 | 1 | 0 | 0 | 0 | 0 | 0 | 1 | 3 |
| <u>RAPGEF4</u> | 1 | 0 | 0 | 1 | 0 | 0 | 0 | 0 | 0 | 1 | 3 |
| <u>DIDO1</u>   | 1 | 0 | 0 | 1 | 0 | 0 | 0 | 0 | 0 | 1 | 3 |
| <u>DIDO1</u>   | 1 | 0 | 0 | 1 | 0 | 0 | 0 | 0 | 0 | 1 | 3 |
| <u>BTN2A1</u>  | 1 | 1 | 0 | 1 | 0 | 0 | 0 | 0 | 0 | 0 | 3 |
| <u>PTPRT</u>   | 1 | 0 | 0 | 1 | 0 | 0 | 0 | 0 | 0 | 1 | 3 |
| <u>ZWINT</u>   | 1 | 1 | 0 | 1 | 0 | 0 | 0 | 0 | 0 | 0 | 3 |
| <u>ZWINT</u>   | 1 | 1 | 0 | 1 | 0 | 0 | 0 | 0 | 0 | 0 | 3 |
| <u>DMC1</u>    | 1 | 1 | 0 | 1 | 0 | 0 | 0 | 0 | 0 | 0 | 3 |
| <u>NUDT4</u>   | 1 | 0 | 0 | 1 | 0 | 0 | 0 | 0 | 0 | 1 | 3 |
| <u>PSIP1</u>   | 1 | 0 | 0 | 1 | 0 | 0 | 0 | 0 | 0 | 1 | 3 |
| <u>PSIP1</u>   | 1 | 0 | 0 | 1 | 0 | 0 | 0 | 0 | 0 | 1 | 3 |
| <u>FAM107A</u> | 1 | 0 | 0 | 1 | 0 | 0 | 0 | 0 | 0 | 1 | 3 |
| <u>LZTS1</u>   | 1 | 1 | 0 | 1 | 0 | 0 | 0 | 0 | 0 | 0 | 3 |

|                 |   |   |   |   |   |   |   |   |   |   |   |
|-----------------|---|---|---|---|---|---|---|---|---|---|---|
| <u>RASSF1</u>   | 1 | 0 | 0 | 1 | 0 | 0 | 0 | 0 | 0 | 1 | 3 |
| <u>RASSF1</u>   | 1 | 0 | 0 | 1 | 0 | 0 | 0 | 0 | 0 | 1 | 3 |
| <u>RASSF1</u>   | 1 | 0 | 0 | 1 | 0 | 0 | 0 | 0 | 0 | 1 | 3 |
| <u>CHKA</u>     | 1 | 0 | 0 | 1 | 0 | 0 | 0 | 0 | 0 | 1 | 3 |
| <u>ADCY6</u>    | 1 | 1 | 0 | 1 | 0 | 0 | 0 | 0 | 0 | 0 | 3 |
| <u>POLI</u>     | 0 | 1 | 0 | 1 | 0 | 0 | 0 | 0 | 0 | 1 | 3 |
| <u>HPS5</u>     | 1 | 0 | 0 | 1 | 0 | 0 | 0 | 0 | 0 | 1 | 3 |
| <u>HPS5</u>     | 1 | 0 | 0 | 1 | 0 | 0 | 0 | 0 | 0 | 1 | 3 |
| <u>RNF24</u>    | 0 | 1 | 0 | 1 | 0 | 0 | 0 | 0 | 0 | 1 | 3 |
| <u>LARP4</u>    | 1 | 0 | 0 | 1 | 0 | 0 | 0 | 0 | 0 | 1 | 3 |
| <u>LARP4</u>    | 1 | 0 | 0 | 1 | 0 | 0 | 0 | 0 | 0 | 1 | 3 |
| <u>RNF13</u>    | 1 | 0 | 0 | 1 | 0 | 0 | 0 | 0 | 0 | 1 | 3 |
| <u>ZNF257</u>   | 0 | 1 | 0 | 1 | 0 | 0 | 0 | 0 | 0 | 1 | 3 |
| <u>PALM2</u>    | 0 | 1 | 0 | 1 | 0 | 0 | 0 | 0 | 0 | 1 | 3 |
| <u>EFHC1</u>    | 0 | 1 | 0 | 1 | 0 | 0 | 0 | 0 | 0 | 1 | 3 |
| <u>CHRNE</u>    | 1 | 1 | 0 | 1 | 0 | 0 | 0 | 0 | 0 | 0 | 3 |
| <u>ERMAP</u>    | 1 | 0 | 0 | 1 | 0 | 0 | 0 | 0 | 0 | 1 | 3 |
| <u>SLC25A25</u> | 1 | 0 | 0 | 1 | 0 | 0 | 0 | 0 | 0 | 1 | 3 |
| <u>SLC25A25</u> | 1 | 0 | 0 | 1 | 0 | 0 | 0 | 0 | 0 | 1 | 3 |
| <u>OSBPL1A</u>  | 1 | 0 | 0 | 1 | 0 | 0 | 0 | 0 | 0 | 1 | 3 |
| <u>C1QTNF3</u>  | 1 | 1 | 0 | 1 | 0 | 0 | 0 | 0 | 0 | 0 | 3 |
| <u>ZNF618</u>   | 0 | 1 | 0 | 1 | 0 | 0 | 0 | 0 | 0 | 1 | 3 |
| <u>MARCH3</u>   | 1 | 1 | 0 | 1 | 0 | 0 | 0 | 0 | 0 | 0 | 3 |
| <u>OMA1</u>     | 1 | 1 | 0 | 1 | 0 | 0 | 0 | 0 | 0 | 0 | 3 |
| <u>GBP4</u>     | 1 | 1 | 0 | 1 | 0 | 0 | 0 | 0 | 0 | 0 | 3 |
| <u>CISH</u>     | 1 | 0 | 0 | 1 | 0 | 0 | 0 | 0 | 0 | 1 | 3 |
| <u>LRRC58</u>   | 0 | 1 | 0 | 1 | 0 | 0 | 0 | 0 | 0 | 1 | 3 |
| <u>IL22RA2</u>  | 1 | 0 | 0 | 1 | 0 | 0 | 0 | 0 | 0 | 1 | 3 |
| <u>LEAP2</u>    | 1 | 1 | 0 | 1 | 0 | 0 | 0 | 0 | 0 | 0 | 3 |
| <u>RAB3IP</u>   | 1 | 0 | 0 | 1 | 0 | 0 | 0 | 0 | 0 | 1 | 3 |
| <u>RAB3IP</u>   | 1 | 0 | 0 | 1 | 0 | 0 | 0 | 0 | 0 | 1 | 3 |
| <u>RAB3IP</u>   | 1 | 0 | 0 | 1 | 0 | 0 | 0 | 0 | 0 | 1 | 3 |
| <u>MRGPRX2</u>  | 1 | 1 | 0 | 1 | 0 | 0 | 0 | 0 | 0 | 0 | 3 |
| <u>ADD1</u>     | 1 | 0 | 0 | 1 | 0 | 0 | 0 | 0 | 0 | 1 | 3 |
| <u>ADD1</u>     | 1 | 0 | 0 | 1 | 0 | 0 | 0 | 0 | 0 | 1 | 3 |
| <u>ADD1</u>     | 1 | 0 | 0 | 1 | 0 | 0 | 0 | 0 | 0 | 1 | 3 |
| <u>CLCN4</u>    | 0 | 1 | 0 | 1 | 0 | 0 | 0 | 0 | 0 | 1 | 3 |
| <u>CLCN5</u>    | 1 | 0 | 0 | 1 | 0 | 0 | 0 | 0 | 0 | 1 | 3 |
| <u>CLCN5</u>    | 1 | 0 | 0 | 1 | 0 | 0 | 0 | 0 | 0 | 1 | 3 |
| <u>ANTXR2</u>   | 0 | 1 | 0 | 1 | 0 | 0 | 0 | 0 | 0 | 1 | 3 |
| <u>FAM24A</u>   | 1 | 1 | 0 | 1 | 0 | 0 | 0 | 0 | 0 | 0 | 3 |

|                  |   |   |   |   |   |   |   |   |   |   |   |
|------------------|---|---|---|---|---|---|---|---|---|---|---|
| <u>C10orf83</u>  | 1 | 0 | 0 | 1 | 0 | 0 | 0 | 0 | 0 | 1 | 3 |
| <u>ZFYVE27</u>   | 1 | 0 | 0 | 1 | 0 | 0 | 0 | 0 | 0 | 1 | 3 |
| <u>ZFYVE27</u>   | 1 | 0 | 0 | 1 | 0 | 0 | 0 | 0 | 0 | 1 | 3 |
| <u>PNLIPRP3</u>  | 1 | 1 | 0 | 1 | 0 | 0 | 0 | 0 | 0 | 0 | 3 |
| <u>CLTC</u>      | 1 | 1 | 0 | 1 | 0 | 0 | 0 | 0 | 0 | 0 | 3 |
| <u>BTBD11</u>    | 1 | 0 | 0 | 1 | 0 | 0 | 0 | 0 | 0 | 1 | 3 |
| <u>SLAIN1</u>    | 1 | 1 | 0 | 1 | 0 | 0 | 0 | 0 | 0 | 0 | 3 |
| <u>TRAPPC6B</u>  | 1 | 0 | 0 | 1 | 0 | 0 | 0 | 0 | 0 | 1 | 3 |
| <u>SOCS4</u>     | 1 | 0 | 0 | 1 | 0 | 0 | 0 | 0 | 0 | 1 | 3 |
| <u>SLC24A4</u>   | 1 | 0 | 0 | 1 | 0 | 0 | 0 | 0 | 0 | 1 | 3 |
| <u>SLC24A4</u>   | 1 | 0 | 0 | 1 | 0 | 0 | 0 | 0 | 0 | 1 | 3 |
| <u>CCR6</u>      | 1 | 1 | 0 | 1 | 0 | 0 | 0 | 0 | 0 | 0 | 3 |
| <u>SLC38A10</u>  | 1 | 1 | 0 | 1 | 0 | 0 | 0 | 0 | 0 | 0 | 3 |
| <u>CANT1</u>     | 1 | 0 | 0 | 1 | 0 | 0 | 0 | 0 | 0 | 1 | 3 |
| <u>USH1G</u>     | 1 | 1 | 0 | 1 | 0 | 0 | 0 | 0 | 0 | 0 | 3 |
| <u>C18orf37</u>  | 1 | 1 | 0 | 1 | 0 | 0 | 0 | 0 | 0 | 0 | 3 |
| <u>CNGB1</u>     | 1 | 1 | 0 | 1 | 0 | 0 | 0 | 0 | 0 | 0 | 3 |
| <u>CNR1</u>      | 1 | 0 | 0 | 1 | 0 | 0 | 0 | 0 | 0 | 1 | 3 |
| <u>COL1A2</u>    | 1 | 1 | 0 | 1 | 0 | 0 | 0 | 0 | 0 | 0 | 3 |
| <u>C20orf85</u>  | 1 | 1 | 0 | 1 | 0 | 0 | 0 | 0 | 0 | 0 | 3 |
| <u>TBC1D20</u>   | 1 | 1 | 0 | 1 | 0 | 0 | 0 | 0 | 0 | 0 | 3 |
| <u>C22orf39</u>  | 0 | 1 | 0 | 1 | 0 | 0 | 0 | 0 | 0 | 1 | 3 |
| <u>COL6A3</u>    | 1 | 0 | 0 | 1 | 0 | 0 | 0 | 0 | 0 | 1 | 3 |
| <u>COL6A3</u>    | 1 | 0 | 0 | 1 | 0 | 0 | 0 | 0 | 0 | 1 | 3 |
| <u>COL6A3</u>    | 1 | 0 | 0 | 1 | 0 | 0 | 0 | 0 | 0 | 1 | 3 |
| <u>COL6A3</u>    | 1 | 0 | 0 | 1 | 0 | 0 | 0 | 0 | 0 | 1 | 3 |
| <u>XIRP2</u>     | 1 | 1 | 0 | 1 | 0 | 0 | 0 | 0 | 0 | 0 | 3 |
| <u>LOC130074</u> | 1 | 1 | 0 | 1 | 0 | 0 | 0 | 0 | 0 | 0 | 3 |
| <u>ACVR1C</u>    | 1 | 0 | 0 | 1 | 0 | 0 | 0 | 0 | 0 | 1 | 3 |
| <u>ACVR1C</u>    | 1 | 0 | 0 | 1 | 0 | 0 | 0 | 0 | 0 | 1 | 3 |
| <u>ACVR1C</u>    | 1 | 0 | 0 | 1 | 0 | 0 | 0 | 0 | 0 | 1 | 3 |
| <u>ALS2CR12</u>  | 1 | 0 | 0 | 1 | 0 | 0 | 0 | 0 | 0 | 1 | 3 |
| <u>LYPD6</u>     | 1 | 1 | 0 | 1 | 0 | 0 | 0 | 0 | 0 | 0 | 3 |
| <u>CD200R1</u>   | 1 | 0 | 0 | 1 | 0 | 0 | 0 | 0 | 0 | 1 | 3 |
| <u>GLYCTK</u>    | 1 | 1 | 0 | 1 | 0 | 0 | 0 | 0 | 0 | 0 | 3 |
| <u>TMEM155</u>   | 1 | 1 | 0 | 1 | 0 | 0 | 0 | 0 | 0 | 0 | 3 |
| <u>PABPC4L</u>   | 0 | 1 | 0 | 1 | 0 | 0 | 0 | 0 | 0 | 1 | 3 |
| <u>LIN54</u>     | 1 | 1 | 0 | 1 | 0 | 0 | 0 | 0 | 0 | 0 | 3 |
| <u>JMY</u>       | 1 | 1 | 0 | 1 | 0 | 0 | 0 | 0 | 0 | 0 | 3 |
| <u>GRPEL2</u>    | 1 | 1 | 0 | 1 | 0 | 0 | 0 | 0 | 0 | 0 | 3 |
| <u>ADAT2</u>     | 0 | 1 | 0 | 1 | 0 | 0 | 0 | 0 | 0 | 1 | 3 |

|                 |   |   |   |   |   |   |   |   |   |   |   |
|-----------------|---|---|---|---|---|---|---|---|---|---|---|
| <u>ADORA2A</u>  | 1 | 1 | 0 | 1 | 0 | 0 | 0 | 0 | 0 | 0 | 3 |
| <u>PM20D2</u>   | 1 | 1 | 0 | 1 | 0 | 0 | 0 | 0 | 0 | 0 | 3 |
| <u>CP</u>       | 1 | 1 | 0 | 1 | 0 | 0 | 0 | 0 | 0 | 0 | 3 |
| <u>LRGUK</u>    | 1 | 1 | 0 | 1 | 0 | 0 | 0 | 0 | 0 | 0 | 3 |
| <u>WDR21C</u>   | 0 | 1 | 0 | 1 | 0 | 0 | 0 | 0 | 0 | 1 | 3 |
| <u>PTPDC1</u>   | 1 | 0 | 0 | 1 | 0 | 0 | 0 | 0 | 0 | 1 | 3 |
| <u>CREBBP</u>   | 1 | 0 | 0 | 1 | 0 | 0 | 0 | 0 | 0 | 1 | 3 |
| <u>C9orf23</u>  | 1 | 0 | 0 | 1 | 0 | 0 | 0 | 0 | 0 | 1 | 3 |
| <u>CREM</u>     | 1 | 1 | 0 | 1 | 0 | 0 | 0 | 0 | 0 | 0 | 3 |
| <u>CRHBP</u>    | 1 | 1 | 0 | 1 | 0 | 0 | 0 | 0 | 0 | 0 | 3 |
| <u>MYO3B</u>    | 1 | 1 | 0 | 1 | 0 | 0 | 0 | 0 | 0 | 0 | 3 |
| <u>RIMS4</u>    | 1 | 1 | 0 | 1 | 0 | 0 | 0 | 0 | 0 | 0 | 3 |
| <u>UBE2F</u>    | 1 | 1 | 0 | 1 | 0 | 0 | 0 | 0 | 0 | 0 | 3 |
| <u>SMCR8</u>    | 0 | 1 | 0 | 1 | 0 | 0 | 0 | 0 | 0 | 1 | 3 |
| <u>SIRPA</u>    | 1 | 1 | 0 | 1 | 0 | 0 | 0 | 0 | 0 | 0 | 3 |
| <u>C5orf20</u>  | 0 | 1 | 0 | 1 | 0 | 0 | 0 | 0 | 0 | 1 | 3 |
| <u>UBQLNL</u>   | 1 | 1 | 0 | 1 | 0 | 0 | 0 | 0 | 0 | 0 | 3 |
| <u>KDEL2</u>    | 1 | 1 | 0 | 1 | 0 | 0 | 0 | 0 | 0 | 0 | 3 |
| <u>ALG10B</u>   | 0 | 1 | 0 | 1 | 0 | 0 | 0 | 0 | 0 | 1 | 3 |
| <u>ZNF664</u>   | 0 | 1 | 0 | 1 | 0 | 0 | 0 | 0 | 0 | 1 | 3 |
| <u>RDH12</u>    | 1 | 1 | 0 | 1 | 0 | 0 | 0 | 0 | 0 | 0 | 3 |
| <u>ABHD12B</u>  | 1 | 1 | 0 | 1 | 0 | 0 | 0 | 0 | 0 | 0 | 3 |
| <u>ZADH1</u>    | 1 | 0 | 0 | 1 | 0 | 0 | 0 | 0 | 0 | 1 | 3 |
| <u>GSG1L</u>    | 1 | 0 | 0 | 1 | 0 | 0 | 0 | 0 | 0 | 1 | 3 |
| <u>C16orf71</u> | 1 | 1 | 0 | 1 | 0 | 0 | 0 | 0 | 0 | 0 | 3 |
| <u>TOM1L2</u>   | 0 | 1 | 0 | 1 | 0 | 0 | 0 | 0 | 0 | 1 | 3 |
| <u>ZNRF4</u>    | 1 | 1 | 0 | 1 | 0 | 0 | 0 | 0 | 0 | 0 | 3 |
| <u>CTBS</u>     | 0 | 1 | 0 | 1 | 0 | 0 | 0 | 0 | 0 | 1 | 3 |
| <u>CTH</u>      | 1 | 1 | 0 | 1 | 0 | 0 | 0 | 0 | 0 | 0 | 3 |
| <u>C1orf84</u>  | 0 | 1 | 0 | 1 | 0 | 0 | 0 | 0 | 0 | 1 | 3 |
| <u>CCDC17</u>   | 0 | 1 | 0 | 1 | 0 | 0 | 0 | 0 | 0 | 1 | 3 |
| <u>CTNND1</u>   | 1 | 0 | 0 | 1 | 0 | 0 | 0 | 0 | 0 | 1 | 3 |
| <u>CTNND1</u>   | 1 | 0 | 0 | 1 | 0 | 0 | 0 | 0 | 0 | 1 | 3 |
| <u>CTNND1</u>   | 1 | 0 | 0 | 1 | 0 | 0 | 0 | 0 | 0 | 1 | 3 |
| <u>CTNND1</u>   | 1 | 0 | 0 | 1 | 0 | 0 | 0 | 0 | 0 | 1 | 3 |
| <u>CTNND1</u>   | 1 | 0 | 0 | 1 | 0 | 0 | 0 | 0 | 0 | 1 | 3 |
| <u>CTNND1</u>   | 1 | 0 | 0 | 1 | 0 | 0 | 0 | 0 | 0 | 1 | 3 |
| <u>CTNND1</u>   | 1 | 0 | 0 | 1 | 0 | 0 | 0 | 0 | 0 | 1 | 3 |
| <u>CTNND1</u>   | 1 | 0 | 0 | 1 | 0 | 0 | 0 | 0 | 0 | 1 | 3 |
| <u>CTNND1</u>   | 1 | 0 | 0 | 1 | 0 | 0 | 0 | 0 | 0 | 1 | 3 |
| <u>CTNND1</u>   | 1 | 0 | 0 | 1 | 0 | 0 | 0 | 0 | 0 | 1 | 3 |
| <u>FBXO41</u>   | 0 | 1 | 0 | 1 | 0 | 0 | 0 | 0 | 0 | 1 | 3 |
| <u>ARL6IP6</u>  | 1 | 1 | 0 | 1 | 0 | 0 | 0 | 0 | 0 | 0 | 3 |
| <u>FAM119A</u>  | 0 | 1 | 0 | 1 | 0 | 0 | 0 | 0 | 0 | 1 | 3 |



|                  |   |   |   |   |   |   |   |   |   |   |   |
|------------------|---|---|---|---|---|---|---|---|---|---|---|
| <u>SLC16A14</u>  | 1 | 1 | 0 | 1 | 0 | 0 | 0 | 0 | 0 | 0 | 3 |
| <u>GPR155</u>    | 1 | 0 | 0 | 1 | 0 | 0 | 0 | 0 | 0 | 1 | 3 |
| <u>RNF38</u>     | 1 | 0 | 0 | 1 | 0 | 0 | 0 | 0 | 0 | 1 | 3 |
| <u>RNF38</u>     | 1 | 0 | 0 | 1 | 0 | 0 | 0 | 0 | 0 | 1 | 3 |
| <u>RNF38</u>     | 1 | 0 | 0 | 1 | 0 | 0 | 0 | 0 | 0 | 1 | 3 |
| <u>CNTN4</u>     | 0 | 0 | 0 | 1 | 1 | 0 | 0 | 0 | 0 | 1 | 3 |
| <u>IGSF11</u>    | 1 | 0 | 0 | 1 | 0 | 0 | 0 | 0 | 0 | 1 | 3 |
| <u>NFXL1</u>     | 1 | 1 | 0 | 1 | 0 | 0 | 0 | 0 | 0 | 0 | 3 |
| <u>CCDC112</u>   | 1 | 1 | 0 | 1 | 0 | 0 | 0 | 0 | 0 | 0 | 3 |
| <u>CYLD</u>      | 1 | 0 | 0 | 1 | 0 | 0 | 0 | 0 | 0 | 1 | 3 |
| <u>CYLD</u>      | 1 | 0 | 0 | 1 | 0 | 0 | 0 | 0 | 0 | 1 | 3 |
| <u>ZNF425</u>    | 1 | 1 | 0 | 1 | 0 | 0 | 0 | 0 | 0 | 0 | 3 |
| <u>VPS13B</u>    | 1 | 0 | 0 | 1 | 0 | 0 | 0 | 0 | 0 | 1 | 3 |
| <u>FAM91A1</u>   | 1 | 1 | 0 | 1 | 0 | 0 | 0 | 0 | 0 | 0 | 3 |
| <u>CYP11B1</u>   | 1 | 0 | 0 | 1 | 0 | 0 | 0 | 0 | 0 | 1 | 3 |
| <u>CYP19A1</u>   | 1 | 0 | 0 | 1 | 0 | 0 | 0 | 0 | 0 | 1 | 3 |
| <u>CYP26A1</u>   | 0 | 1 | 0 | 1 | 0 | 0 | 0 | 0 | 0 | 1 | 3 |
| <u>DACH1</u>     | 1 | 1 | 0 | 1 | 0 | 0 | 0 | 0 | 0 | 0 | 3 |
| <u>DAD1</u>      | 1 | 1 | 0 | 1 | 0 | 0 | 0 | 0 | 0 | 0 | 3 |
| <u>CLEC12A</u>   | 0 | 1 | 0 | 1 | 0 | 0 | 0 | 0 | 0 | 1 | 3 |
| <u>LOC162073</u> | 0 | 1 | 0 | 1 | 0 | 0 | 0 | 0 | 0 | 1 | 3 |
| <u>C18orf54</u>  | 1 | 0 | 0 | 1 | 0 | 0 | 0 | 0 | 0 | 1 | 3 |
| <u>ZNF320</u>    | 0 | 1 | 0 | 1 | 0 | 0 | 0 | 0 | 0 | 1 | 3 |
| <u>DCN</u>       | 1 | 0 | 0 | 1 | 0 | 0 | 0 | 0 | 0 | 1 | 3 |
| <u>DCN</u>       | 1 | 0 | 0 | 1 | 0 | 0 | 0 | 0 | 0 | 1 | 3 |
| <u>DCN</u>       | 1 | 0 | 0 | 1 | 0 | 0 | 0 | 0 | 0 | 1 | 3 |
| <u>PAP2D</u>     | 1 | 0 | 0 | 1 | 0 | 0 | 0 | 0 | 0 | 1 | 3 |
| <u>AP1G1</u>     | 1 | 0 | 0 | 1 | 0 | 0 | 0 | 0 | 0 | 1 | 3 |
| <u>DCX</u>       | 1 | 0 | 0 | 1 | 0 | 0 | 0 | 0 | 0 | 1 | 3 |
| <u>DCX</u>       | 1 | 0 | 0 | 1 | 0 | 0 | 0 | 0 | 0 | 1 | 3 |
| <u>AES</u>       | 1 | 0 | 0 | 1 | 0 | 0 | 0 | 0 | 0 | 1 | 3 |
| <u>SPATA5</u>    | 0 | 1 | 0 | 1 | 0 | 0 | 0 | 0 | 0 | 1 | 3 |
| <u>RASSF6</u>    | 1 | 0 | 0 | 1 | 0 | 0 | 0 | 0 | 0 | 1 | 3 |
| <u>COL22A1</u>   | 1 | 1 | 0 | 1 | 0 | 0 | 0 | 0 | 0 | 0 | 3 |
| <u>SNX31</u>     | 1 | 1 | 0 | 1 | 0 | 0 | 0 | 0 | 0 | 0 | 3 |
| <u>GLIS3</u>     | 1 | 0 | 0 | 1 | 0 | 0 | 0 | 0 | 0 | 1 | 3 |
| <u>S100Z</u>     | 0 | 1 | 0 | 1 | 0 | 0 | 0 | 0 | 0 | 1 | 3 |
| <u>COMMD6</u>    | 1 | 0 | 0 | 1 | 0 | 0 | 0 | 0 | 0 | 1 | 3 |
| <u>ADAMTS17</u>  | 1 | 1 | 0 | 1 | 0 | 0 | 0 | 0 | 0 | 0 | 3 |
| <u>KCNG3</u>     | 1 | 0 | 0 | 1 | 0 | 0 | 0 | 0 | 0 | 1 | 3 |
| <u>DIAPH1</u>    | 1 | 0 | 0 | 1 | 0 | 0 | 0 | 0 | 0 | 1 | 3 |

|                  |   |   |   |   |   |   |   |   |   |   |   |
|------------------|---|---|---|---|---|---|---|---|---|---|---|
| <u>DIO2</u>      | 0 | 0 | 0 | 1 | 1 | 0 | 0 | 0 | 0 | 1 | 3 |
| <u>DLX1</u>      | 1 | 1 | 0 | 1 | 0 | 0 | 0 | 0 | 0 | 0 | 3 |
| <u>ACAN</u>      | 0 | 1 | 0 | 1 | 0 | 0 | 0 | 0 | 0 | 1 | 3 |
| <u>DNAH8</u>     | 0 | 1 | 0 | 1 | 0 | 0 | 0 | 0 | 0 | 1 | 3 |
| <u>AGL</u>       | 1 | 0 | 0 | 1 | 0 | 0 | 0 | 0 | 0 | 1 | 3 |
| <u>AGL</u>       | 1 | 0 | 0 | 1 | 0 | 0 | 0 | 0 | 0 | 1 | 3 |
| <u>AGL</u>       | 1 | 0 | 0 | 1 | 0 | 0 | 0 | 0 | 0 | 1 | 3 |
| <u>AGL</u>       | 1 | 0 | 0 | 1 | 0 | 0 | 0 | 0 | 0 | 1 | 3 |
| <u>AGL</u>       | 1 | 0 | 0 | 1 | 0 | 0 | 0 | 0 | 0 | 1 | 3 |
| <u>DPP6</u>      | 1 | 0 | 0 | 1 | 0 | 0 | 0 | 0 | 0 | 1 | 3 |
| <u>DPP6</u>      | 0 | 1 | 0 | 1 | 0 | 0 | 0 | 0 | 0 | 1 | 3 |
| <u>DRP2</u>      | 0 | 1 | 0 | 1 | 0 | 0 | 0 | 0 | 0 | 1 | 3 |
| <u>SLC26A2</u>   | 1 | 1 | 0 | 1 | 0 | 0 | 0 | 0 | 0 | 0 | 3 |
| <u>DTNA</u>      | 0 | 1 | 0 | 1 | 0 | 0 | 0 | 0 | 0 | 1 | 3 |
| <u>DTNA</u>      | 1 | 0 | 0 | 1 | 0 | 0 | 0 | 0 | 0 | 1 | 3 |
| <u>DTNA</u>      | 1 | 0 | 0 | 1 | 0 | 0 | 0 | 0 | 0 | 1 | 3 |
| <u>DTNA</u>      | 0 | 0 | 0 | 1 | 1 | 0 | 0 | 0 | 0 | 1 | 3 |
| <u>DTNA</u>      | 1 | 0 | 0 | 1 | 0 | 0 | 0 | 0 | 0 | 1 | 3 |
| <u>DTNA</u>      | 0 | 0 | 0 | 1 | 1 | 0 | 0 | 0 | 0 | 1 | 3 |
| <u>AGTR1</u>     | 1 | 0 | 0 | 1 | 0 | 0 | 0 | 0 | 0 | 1 | 3 |
| <u>AGTR1</u>     | 0 | 1 | 0 | 1 | 0 | 0 | 0 | 0 | 0 | 1 | 3 |
| <u>AGTR1</u>     | 1 | 0 | 0 | 1 | 0 | 0 | 0 | 0 | 0 | 1 | 3 |
| <u>E2F5</u>      | 1 | 0 | 0 | 1 | 0 | 0 | 0 | 0 | 0 | 1 | 3 |
| <u>AGXT</u>      | 1 | 1 | 0 | 1 | 0 | 0 | 0 | 0 | 0 | 0 | 3 |
| <u>EDA</u>       | 1 | 1 | 0 | 1 | 0 | 0 | 0 | 0 | 0 | 0 | 3 |
| <u>EDNRB</u>     | 1 | 1 | 0 | 1 | 0 | 0 | 0 | 0 | 0 | 0 | 3 |
| <u>AHR</u>       | 0 | 1 | 0 | 1 | 0 | 0 | 0 | 0 | 0 | 1 | 3 |
| <u>EIF1AX</u>    | 0 | 1 | 0 | 1 | 0 | 0 | 0 | 0 | 0 | 1 | 3 |
| <u>LOC196415</u> | 0 | 1 | 0 | 1 | 0 | 0 | 0 | 0 | 0 | 1 | 3 |
| <u>C12orf12</u>  | 0 | 1 | 0 | 1 | 0 | 0 | 0 | 0 | 0 | 1 | 3 |
| <u>GRAMD2</u>    | 1 | 1 | 0 | 1 | 0 | 0 | 0 | 0 | 0 | 0 | 3 |
| <u>ACSF3</u>     | 1 | 0 | 0 | 1 | 0 | 0 | 0 | 0 | 0 | 1 | 3 |
| <u>EIF4EBP2</u>  | 1 | 1 | 0 | 1 | 0 | 0 | 0 | 0 | 0 | 0 | 3 |
| <u>DZIP1L</u>    | 1 | 1 | 0 | 1 | 0 | 0 | 0 | 0 | 0 | 0 | 3 |
| <u>ELAVL3</u>    | 1 | 0 | 0 | 1 | 0 | 0 | 0 | 0 | 0 | 1 | 3 |
| <u>ELAVL4</u>    | 1 | 1 | 0 | 1 | 0 | 0 | 0 | 0 | 0 | 0 | 3 |
| <u>KRTCAP2</u>   | 0 | 1 | 0 | 1 | 0 | 0 | 0 | 0 | 0 | 1 | 3 |
| <u>C1orf69</u>   | 1 | 1 | 0 | 1 | 0 | 0 | 0 | 0 | 0 | 0 | 3 |
| <u>TAPT1</u>     | 0 | 1 | 0 | 1 | 0 | 0 | 0 | 0 | 0 | 1 | 3 |
| <u>ENSA</u>      | 0 | 1 | 0 | 1 | 0 | 0 | 0 | 0 | 0 | 1 | 3 |
| <u>EPB41</u>     | 1 | 0 | 0 | 1 | 0 | 0 | 0 | 0 | 0 | 1 | 3 |

|                 |   |   |   |   |   |   |   |   |   |   |   |
|-----------------|---|---|---|---|---|---|---|---|---|---|---|
| <u>EPB41</u>    | 1 | 0 | 0 | 1 | 0 | 0 | 0 | 0 | 0 | 1 | 3 |
| <u>DDX26B</u>   | 1 | 1 | 0 | 1 | 0 | 0 | 0 | 0 | 0 | 0 | 3 |
| <u>HIPK1</u>    | 1 | 0 | 0 | 1 | 0 | 0 | 0 | 0 | 0 | 1 | 3 |
| <u>HIPK1</u>    | 1 | 0 | 0 | 1 | 0 | 0 | 0 | 0 | 0 | 1 | 3 |
| <u>SLC44A5</u>  | 1 | 1 | 0 | 1 | 0 | 0 | 0 | 0 | 0 | 0 | 3 |
| <u>C3orf58</u>  | 1 | 0 | 0 | 1 | 0 | 0 | 0 | 0 | 0 | 1 | 3 |
| <u>ERBB4</u>    | 1 | 0 | 0 | 1 | 0 | 0 | 0 | 0 | 0 | 1 | 3 |
| <u>ERG</u>      | 1 | 0 | 0 | 1 | 0 | 0 | 0 | 0 | 0 | 1 | 3 |
| <u>ESR1</u>     | 1 | 0 | 0 | 1 | 0 | 0 | 0 | 0 | 0 | 1 | 3 |
| <u>ESR1</u>     | 1 | 0 | 0 | 1 | 0 | 0 | 0 | 0 | 0 | 1 | 3 |
| <u>ESRRG</u>    | 1 | 1 | 0 | 1 | 0 | 0 | 0 | 0 | 0 | 0 | 3 |
| <u>TYSND1</u>   | 1 | 1 | 0 | 1 | 0 | 0 | 0 | 0 | 0 | 0 | 3 |
| <u>TYSND1</u>   | 1 | 1 | 0 | 1 | 0 | 0 | 0 | 0 | 0 | 0 | 3 |
| <u>SLC39A12</u> | 1 | 0 | 0 | 1 | 1 | 0 | 0 | 0 | 0 | 0 | 3 |
| <u>GPR116</u>   | 1 | 0 | 0 | 1 | 0 | 0 | 0 | 0 | 0 | 1 | 3 |
| <u>ATXN7L1</u>  | 1 | 1 | 0 | 1 | 0 | 0 | 0 | 0 | 0 | 0 | 3 |
| <u>FGF1</u>     | 0 | 1 | 0 | 1 | 0 | 0 | 0 | 0 | 0 | 1 | 3 |
| <u>FGF12</u>    | 1 | 0 | 0 | 1 | 0 | 0 | 0 | 0 | 0 | 1 | 3 |
| <u>FGFR1</u>    | 1 | 0 | 0 | 1 | 0 | 0 | 0 | 0 | 0 | 1 | 3 |
| <u>FGFR1</u>    | 1 | 0 | 0 | 1 | 0 | 0 | 0 | 0 | 0 | 1 | 3 |
| <u>FGFR1</u>    | 1 | 0 | 0 | 1 | 0 | 0 | 0 | 0 | 0 | 1 | 3 |
| <u>GPC5</u>     | 0 | 1 | 0 | 1 | 0 | 0 | 0 | 0 | 0 | 1 | 3 |
| <u>TFEC</u>     | 1 | 0 | 0 | 1 | 0 | 0 | 0 | 0 | 0 | 1 | 3 |
| <u>ZNF652</u>   | 0 | 1 | 0 | 1 | 0 | 0 | 0 | 0 | 0 | 1 | 3 |
| <u>AAK1</u>     | 0 | 1 | 0 | 1 | 0 | 0 | 0 | 0 | 0 | 1 | 3 |
| <u>ICK</u>      | 1 | 1 | 0 | 1 | 0 | 0 | 0 | 0 | 0 | 0 | 3 |
| <u>DIS3</u>     | 1 | 0 | 0 | 1 | 0 | 0 | 0 | 0 | 0 | 1 | 3 |
| <u>EPN2</u>     | 1 | 0 | 0 | 1 | 0 | 0 | 0 | 0 | 0 | 1 | 3 |
| <u>EPN2</u>     | 1 | 0 | 0 | 1 | 0 | 0 | 0 | 0 | 0 | 1 | 3 |
| <u>TRAK1</u>    | 0 | 1 | 0 | 1 | 0 | 0 | 0 | 0 | 0 | 1 | 3 |
| <u>NCBP2</u>    | 1 | 0 | 0 | 1 | 0 | 0 | 0 | 0 | 0 | 1 | 3 |
| <u>MAPRE1</u>   | 1 | 1 | 0 | 1 | 0 | 0 | 0 | 0 | 0 | 0 | 3 |
| <u>KIN</u>      | 1 | 1 | 0 | 1 | 0 | 0 | 0 | 0 | 0 | 0 | 3 |
| <u>PCNX</u>     | 0 | 1 | 0 | 1 | 0 | 0 | 0 | 0 | 0 | 1 | 3 |
| <u>LIMCH1</u>   | 0 | 1 | 0 | 1 | 0 | 0 | 0 | 0 | 0 | 1 | 3 |
| <u>RAB21</u>    | 1 | 1 | 0 | 1 | 0 | 0 | 0 | 0 | 0 | 0 | 3 |
| <u>FBXO21</u>   | 1 | 0 | 0 | 1 | 0 | 0 | 0 | 0 | 0 | 1 | 3 |
| <u>TMCC1</u>    | 1 | 0 | 0 | 1 | 0 | 0 | 0 | 0 | 0 | 1 | 3 |
| <u>XPO7</u>     | 0 | 1 | 0 | 1 | 0 | 0 | 0 | 0 | 0 | 1 | 3 |
| <u>FNBP1</u>    | 1 | 1 | 0 | 1 | 0 | 0 | 0 | 0 | 0 | 0 | 3 |
| <u>NMNAT2</u>   | 1 | 0 | 0 | 1 | 0 | 0 | 0 | 0 | 0 | 1 | 3 |

|          |   |   |   |   |   |   |   |   |   |   |   |
|----------|---|---|---|---|---|---|---|---|---|---|---|
| PEG10    | 0 | 1 | 0 | 1 | 0 | 0 | 0 | 0 | 0 | 1 | 3 |
| KIF1B    | 1 | 1 | 0 | 1 | 0 | 0 | 0 | 0 | 0 | 0 | 3 |
| KIF1B    | 1 | 1 | 0 | 1 | 0 | 0 | 0 | 0 | 0 | 0 | 3 |
| GARNL4   | 0 | 1 | 0 | 1 | 0 | 0 | 0 | 0 | 0 | 1 | 3 |
| TNRC6B   | 1 | 0 | 0 | 1 | 0 | 0 | 0 | 0 | 0 | 1 | 3 |
| GRAMD4   | 1 | 1 | 0 | 1 | 0 | 0 | 0 | 0 | 0 | 0 | 3 |
| CLCC1    | 1 | 0 | 0 | 1 | 0 | 0 | 0 | 0 | 0 | 1 | 3 |
| SEPT6    | 1 | 1 | 0 | 1 | 0 | 0 | 0 | 0 | 0 | 0 | 3 |
| SNX13    | 1 | 1 | 0 | 1 | 0 | 0 | 0 | 0 | 0 | 0 | 3 |
| SEPT7    | 1 | 0 | 0 | 1 | 0 | 0 | 0 | 0 | 0 | 1 | 3 |
| SEPT7    | 1 | 0 | 0 | 1 | 0 | 0 | 0 | 0 | 0 | 1 | 3 |
| CEP68    | 1 | 1 | 0 | 1 | 0 | 0 | 0 | 0 | 0 | 0 | 3 |
| RGL1     | 1 | 1 | 0 | 1 | 0 | 0 | 0 | 0 | 0 | 0 | 3 |
| ATG4B    | 1 | 1 | 0 | 1 | 0 | 0 | 0 | 0 | 0 | 0 | 3 |
| ATG4B    | 1 | 1 | 0 | 1 | 0 | 0 | 0 | 0 | 0 | 0 | 3 |
| PSME4    | 0 | 1 | 0 | 1 | 0 | 0 | 0 | 0 | 0 | 1 | 3 |
| JMJD6    | 0 | 1 | 0 | 1 | 0 | 0 | 0 | 0 | 0 | 1 | 3 |
| VPS13A   | 1 | 0 | 0 | 1 | 0 | 0 | 0 | 0 | 0 | 1 | 3 |
| PACS2    | 1 | 0 | 0 | 1 | 0 | 0 | 0 | 0 | 0 | 1 | 3 |
| ANKRD28  | 1 | 1 | 0 | 1 | 0 | 0 | 0 | 0 | 0 | 0 | 3 |
| ANKRD12  | 1 | 0 | 0 | 1 | 0 | 0 | 0 | 0 | 0 | 1 | 3 |
| IQCE     | 0 | 1 | 0 | 1 | 0 | 0 | 0 | 0 | 0 | 1 | 3 |
| TMEM194  | 1 | 0 | 0 | 1 | 0 | 0 | 0 | 0 | 0 | 1 | 3 |
| KIAA0467 | 0 | 1 | 0 | 1 | 0 | 0 | 0 | 0 | 0 | 1 | 3 |
| WDR7     | 1 | 0 | 0 | 1 | 0 | 0 | 0 | 0 | 0 | 1 | 3 |
| KIAA0895 | 1 | 0 | 0 | 1 | 0 | 0 | 0 | 0 | 0 | 1 | 3 |
| FREQ     | 1 | 0 | 0 | 1 | 0 | 0 | 0 | 0 | 0 | 1 | 3 |
| RHOQ     | 1 | 1 | 0 | 1 | 0 | 0 | 0 | 0 | 0 | 0 | 3 |
| HEY1     | 1 | 0 | 0 | 1 | 0 | 0 | 0 | 0 | 0 | 1 | 3 |
| KIAA0240 | 1 | 1 | 0 | 1 | 0 | 0 | 0 | 0 | 0 | 0 | 3 |
| SLC39A14 | 1 | 0 | 0 | 1 | 0 | 0 | 0 | 0 | 0 | 1 | 3 |
| SLC39A14 | 1 | 0 | 0 | 1 | 0 | 0 | 0 | 0 | 0 | 1 | 3 |
| NNT      | 0 | 1 | 0 | 1 | 0 | 0 | 0 | 0 | 0 | 1 | 3 |
| ZMYND8   | 1 | 0 | 0 | 1 | 1 | 0 | 0 | 0 | 0 | 0 | 3 |
| ZMYND8   | 1 | 0 | 0 | 1 | 1 | 0 | 0 | 0 | 0 | 0 | 3 |
| RUSC1    | 0 | 1 | 0 | 1 | 0 | 0 | 0 | 0 | 0 | 1 | 3 |
| KPNA6    | 1 | 1 | 0 | 1 | 0 | 0 | 0 | 0 | 0 | 0 | 3 |
| SGK3     | 1 | 0 | 0 | 1 | 0 | 0 | 0 | 0 | 0 | 1 | 3 |
| SGK3     | 1 | 0 | 0 | 1 | 0 | 0 | 0 | 0 | 0 | 1 | 3 |
| PRKD3    | 1 | 1 | 0 | 1 | 0 | 0 | 0 | 0 | 0 | 0 | 3 |
| EID1     | 0 | 1 | 0 | 1 | 0 | 0 | 0 | 0 | 0 | 1 | 3 |

|                 |   |   |   |   |   |   |   |   |   |   |   |
|-----------------|---|---|---|---|---|---|---|---|---|---|---|
| <u>BHMT2</u>    | 1 | 1 | 0 | 1 | 0 | 0 | 0 | 0 | 0 | 0 | 3 |
| <u>IFIT5</u>    | 1 | 1 | 0 | 1 | 0 | 0 | 0 | 0 | 0 | 0 | 3 |
| <u>VGLL2</u>    | 1 | 0 | 0 | 1 | 0 | 0 | 0 | 0 | 0 | 1 | 3 |
| <u>STAC3</u>    | 1 | 1 | 0 | 1 | 0 | 0 | 0 | 0 | 0 | 0 | 3 |
| <u>CENPI</u>    | 0 | 1 | 0 | 1 | 0 | 0 | 0 | 0 | 0 | 1 | 3 |
| <u>FUT5</u>     | 0 | 1 | 0 | 1 | 0 | 0 | 0 | 0 | 0 | 1 | 3 |
| <u>TMEM9</u>    | 1 | 1 | 0 | 1 | 0 | 0 | 0 | 0 | 0 | 0 | 3 |
| <u>C22orf30</u> | 1 | 1 | 0 | 1 | 0 | 0 | 0 | 0 | 0 | 0 | 3 |
| <u>FYB</u>      | 1 | 0 | 0 | 1 | 0 | 0 | 0 | 0 | 0 | 1 | 3 |
| <u>MGC50559</u> | 1 | 0 | 0 | 1 | 0 | 0 | 0 | 0 | 0 | 1 | 3 |
| <u>MCM9</u>     | 0 | 1 | 0 | 1 | 0 | 0 | 0 | 0 | 0 | 1 | 3 |
| <u>GABRA1</u>   | 1 | 0 | 0 | 1 | 0 | 0 | 0 | 0 | 0 | 1 | 3 |
| <u>GABRA1</u>   | 1 | 0 | 0 | 1 | 0 | 0 | 0 | 0 | 0 | 1 | 3 |
| <u>GABRA1</u>   | 1 | 0 | 0 | 1 | 0 | 0 | 0 | 0 | 0 | 1 | 3 |
| <u>GABRA1</u>   | 1 | 0 | 0 | 1 | 0 | 0 | 0 | 0 | 0 | 1 | 3 |
| <u>GABRA1</u>   | 1 | 0 | 0 | 1 | 0 | 0 | 0 | 0 | 0 | 1 | 3 |
| <u>BCL6B</u>    | 0 | 1 | 0 | 1 | 0 | 0 | 0 | 0 | 0 | 1 | 3 |
| <u>GABRB2</u>   | 1 | 0 | 0 | 1 | 0 | 0 | 0 | 0 | 0 | 1 | 3 |
| <u>GABRG2</u>   | 1 | 0 | 0 | 1 | 0 | 0 | 0 | 0 | 0 | 1 | 3 |
| <u>GAD2</u>     | 1 | 1 | 0 | 1 | 0 | 0 | 0 | 0 | 0 | 0 | 3 |
| <u>C11orf41</u> | 0 | 1 | 0 | 1 | 0 | 0 | 0 | 0 | 0 | 1 | 3 |
| <u>KLK5</u>     | 1 | 1 | 0 | 1 | 0 | 0 | 0 | 0 | 0 | 0 | 3 |
| <u>CCRN4L</u>   | 1 | 1 | 0 | 1 | 0 | 0 | 0 | 0 | 0 | 0 | 3 |
| <u>PRDX5</u>    | 1 | 1 | 0 | 1 | 0 | 0 | 0 | 0 | 0 | 0 | 3 |
| <u>ZNF345</u>   | 0 | 1 | 0 | 1 | 0 | 0 | 0 | 0 | 0 | 1 | 3 |
| <u>ARMC8</u>    | 1 | 0 | 0 | 1 | 0 | 0 | 0 | 0 | 0 | 1 | 3 |
| <u>ARMC8</u>    | 1 | 0 | 0 | 1 | 0 | 0 | 0 | 0 | 0 | 1 | 3 |
| <u>RNF19A</u>   | 0 | 1 | 0 | 1 | 0 | 0 | 0 | 0 | 0 | 1 | 3 |
| <u>RNF19A</u>   | 1 | 0 | 0 | 1 | 0 | 0 | 0 | 0 | 0 | 1 | 3 |
| <u>RCHY1</u>    | 1 | 1 | 0 | 1 | 0 | 0 | 0 | 0 | 0 | 0 | 3 |
| <u>RCHY1</u>    | 1 | 1 | 0 | 1 | 0 | 0 | 0 | 0 | 0 | 0 | 3 |
| <u>IFFO</u>     | 1 | 0 | 0 | 1 | 0 | 0 | 0 | 0 | 0 | 1 | 3 |
| <u>C1orf43</u>  | 1 | 0 | 0 | 1 | 0 | 0 | 0 | 0 | 0 | 1 | 3 |
| <u>C1orf43</u>  | 1 | 0 | 0 | 1 | 0 | 0 | 0 | 0 | 0 | 1 | 3 |
| <u>THUMPD3</u>  | 1 | 0 | 0 | 1 | 0 | 0 | 0 | 0 | 0 | 1 | 3 |
| <u>HSPA12A</u>  | 1 | 1 | 0 | 1 | 0 | 0 | 0 | 0 | 0 | 0 | 3 |
| <u>MYRIP</u>    | 1 | 1 | 0 | 1 | 0 | 0 | 0 | 0 | 0 | 0 | 3 |
| <u>GANC</u>     | 0 | 1 | 0 | 1 | 0 | 0 | 0 | 0 | 0 | 1 | 3 |
| <u>SFRS18</u>   | 0 | 1 | 0 | 1 | 0 | 0 | 0 | 0 | 0 | 1 | 3 |
| <u>C2CD2</u>    | 1 | 0 | 0 | 1 | 0 | 0 | 0 | 0 | 0 | 1 | 3 |
| <u>LOC26010</u> | 0 | 1 | 0 | 1 | 0 | 0 | 0 | 0 | 0 | 1 | 3 |

|                 |   |   |   |   |   |   |   |   |   |   |   |
|-----------------|---|---|---|---|---|---|---|---|---|---|---|
| <u>L3MBTL</u>   | 1 | 0 | 0 | 1 | 0 | 0 | 0 | 0 | 0 | 1 | 3 |
| <u>PIP3-E</u>   | 1 | 0 | 0 | 1 | 0 | 0 | 0 | 0 | 0 | 1 | 3 |
| <u>PIP3-E</u>   | 1 | 0 | 0 | 1 | 0 | 0 | 0 | 0 | 0 | 1 | 3 |
| <u>CHD5</u>     | 1 | 1 | 0 | 1 | 0 | 0 | 0 | 0 | 0 | 0 | 3 |
| <u>MAGI3</u>    | 1 | 0 | 0 | 1 | 0 | 0 | 0 | 0 | 0 | 1 | 3 |
| <u>DNM3</u>     | 0 | 1 | 0 | 1 | 0 | 0 | 0 | 0 | 0 | 1 | 3 |
| <u>HERC4</u>    | 1 | 1 | 0 | 1 | 0 | 0 | 0 | 0 | 0 | 0 | 3 |
| <u>WDR21A</u>   | 1 | 0 | 0 | 1 | 0 | 0 | 0 | 0 | 0 | 1 | 3 |
| <u>LRRC32</u>   | 1 | 0 | 0 | 1 | 0 | 0 | 0 | 0 | 0 | 1 | 3 |
| <u>RSL1D1</u>   | 1 | 1 | 0 | 1 | 0 | 0 | 0 | 0 | 0 | 0 | 3 |
| <u>RGS22</u>    | 0 | 1 | 0 | 1 | 0 | 0 | 0 | 0 | 0 | 1 | 3 |
| <u>ARL5A</u>    | 1 | 0 | 0 | 1 | 0 | 0 | 0 | 0 | 0 | 1 | 3 |
| <u>GBP1</u>     | 1 | 1 | 0 | 1 | 0 | 0 | 0 | 0 | 0 | 0 | 3 |
| <u>CNNM3</u>    | 1 | 0 | 0 | 1 | 0 | 0 | 0 | 0 | 0 | 1 | 3 |
| <u>GCNT2</u>    | 1 | 0 | 0 | 1 | 0 | 0 | 0 | 0 | 0 | 1 | 3 |
| <u>GCNT2</u>    | 1 | 0 | 0 | 1 | 0 | 0 | 0 | 0 | 0 | 1 | 3 |
| <u>CKAP2</u>    | 1 | 0 | 0 | 1 | 0 | 0 | 0 | 0 | 0 | 1 | 3 |
| <u>HS6ST3</u>   | 0 | 1 | 0 | 1 | 0 | 0 | 0 | 0 | 0 | 1 | 3 |
| <u>AMFR</u>     | 1 | 1 | 0 | 1 | 0 | 0 | 0 | 0 | 0 | 0 | 3 |
| <u>GFRA1</u>    | 0 | 1 | 0 | 1 | 0 | 0 | 0 | 0 | 0 | 1 | 3 |
| <u>SEC22A</u>   | 1 | 1 | 0 | 1 | 0 | 0 | 0 | 0 | 0 | 0 | 3 |
| <u>ABL2</u>     | 0 | 1 | 0 | 1 | 0 | 0 | 0 | 0 | 0 | 1 | 3 |
| <u>HTF9C</u>    | 1 | 1 | 0 | 1 | 0 | 0 | 0 | 0 | 0 | 0 | 3 |
| <u>D4S234E</u>  | 1 | 0 | 0 | 1 | 0 | 0 | 0 | 0 | 0 | 1 | 3 |
| <u>DAPP1</u>    | 1 | 1 | 0 | 1 | 0 | 0 | 0 | 0 | 0 | 0 | 3 |
| <u>VPS41</u>    | 1 | 0 | 0 | 1 | 0 | 0 | 0 | 0 | 0 | 1 | 3 |
| <u>GK</u>       | 1 | 0 | 0 | 1 | 0 | 0 | 0 | 0 | 0 | 1 | 3 |
| <u>CACYBP</u>   | 1 | 0 | 0 | 1 | 0 | 0 | 0 | 0 | 0 | 1 | 3 |
| <u>INVS</u>     | 1 | 1 | 0 | 1 | 0 | 0 | 0 | 0 | 0 | 0 | 3 |
| <u>SERP1</u>    | 1 | 1 | 0 | 1 | 0 | 0 | 0 | 0 | 0 | 0 | 3 |
| <u>ARFIP1</u>   | 1 | 0 | 0 | 1 | 0 | 0 | 0 | 0 | 0 | 1 | 3 |
| <u>BBS9</u>     | 1 | 0 | 0 | 1 | 0 | 0 | 0 | 0 | 0 | 1 | 3 |
| <u>BBS9</u>     | 1 | 0 | 0 | 1 | 0 | 0 | 0 | 0 | 0 | 1 | 3 |
| <u>PCDH11X</u>  | 1 | 0 | 0 | 1 | 0 | 0 | 0 | 0 | 0 | 1 | 3 |
| <u>PCLO</u>     | 0 | 1 | 0 | 1 | 0 | 0 | 0 | 0 | 0 | 1 | 3 |
| <u>GPD2</u>     | 1 | 0 | 0 | 1 | 0 | 0 | 0 | 0 | 0 | 1 | 3 |
| <u>GPM6A</u>    | 1 | 0 | 0 | 1 | 0 | 0 | 0 | 0 | 0 | 1 | 3 |
| <u>GPM6A</u>    | 1 | 0 | 0 | 1 | 0 | 0 | 0 | 0 | 0 | 1 | 3 |
| <u>GPR3</u>     | 1 | 1 | 0 | 1 | 0 | 0 | 0 | 0 | 0 | 0 | 3 |
| <u>BLOC1S2</u>  | 1 | 0 | 0 | 1 | 0 | 0 | 0 | 0 | 0 | 1 | 3 |
| <u>C11orf47</u> | 1 | 0 | 0 | 1 | 0 | 0 | 0 | 0 | 0 | 1 | 3 |

|                  |   |   |   |   |   |   |   |   |   |   |   |
|------------------|---|---|---|---|---|---|---|---|---|---|---|
| <u>KSR2</u>      | 0 | 1 | 0 | 1 | 0 | 0 | 0 | 0 | 0 | 1 | 3 |
| <u>GLT8D3</u>    | 0 | 1 | 0 | 1 | 0 | 0 | 0 | 0 | 0 | 1 | 3 |
| <u>LOC283514</u> | 1 | 1 | 0 | 1 | 0 | 0 | 0 | 0 | 0 | 0 | 3 |
| <u>C14orf178</u> | 0 | 1 | 0 | 1 | 0 | 0 | 0 | 0 | 0 | 1 | 3 |
| <u>FLJ39743</u>  | 0 | 1 | 0 | 1 | 0 | 0 | 0 | 0 | 0 | 1 | 3 |
| <u>FLJ35220</u>  | 0 | 1 | 0 | 1 | 0 | 0 | 0 | 0 | 0 | 1 | 3 |
| <u>ZNF545</u>    | 0 | 1 | 0 | 1 | 0 | 0 | 0 | 0 | 0 | 1 | 3 |
| <u>FAM80A</u>    | 0 | 1 | 0 | 1 | 0 | 0 | 0 | 0 | 0 | 1 | 3 |
| <u>GPR26</u>     | 1 | 1 | 0 | 1 | 0 | 0 | 0 | 0 | 0 | 0 | 3 |
| <u>ANGPT2</u>    | 1 | 0 | 0 | 1 | 0 | 0 | 0 | 0 | 0 | 1 | 3 |
| <u>ANGPT2</u>    | 1 | 0 | 0 | 1 | 0 | 0 | 0 | 0 | 0 | 1 | 3 |
| <u>NKIRAS1</u>   | 1 | 1 | 0 | 1 | 0 | 0 | 0 | 0 | 0 | 0 | 3 |
| <u>ZNF621</u>    | 1 | 1 | 0 | 1 | 0 | 0 | 0 | 0 | 0 | 0 | 3 |
| <u>C3orf23</u>   | 1 | 0 | 0 | 1 | 0 | 0 | 0 | 0 | 0 | 1 | 3 |
| <u>RNF212</u>    | 1 | 1 | 0 | 1 | 0 | 0 | 0 | 0 | 0 | 0 | 3 |
| <u>RNF212</u>    | 1 | 1 | 0 | 1 | 0 | 0 | 0 | 0 | 0 | 0 | 3 |
| <u>ANK1</u>      | 1 | 0 | 0 | 1 | 0 | 0 | 0 | 0 | 0 | 1 | 3 |
| <u>ANK1</u>      | 1 | 0 | 0 | 1 | 0 | 0 | 0 | 0 | 0 | 1 | 3 |
| <u>ANK1</u>      | 1 | 0 | 0 | 1 | 0 | 0 | 0 | 0 | 0 | 1 | 3 |
| <u>ANK1</u>      | 1 | 0 | 0 | 1 | 0 | 0 | 0 | 0 | 0 | 1 | 3 |
| <u>DPY19L4</u>   | 1 | 1 | 0 | 1 | 0 | 0 | 0 | 0 | 0 | 0 | 3 |
| <u>C9orf47</u>   | 1 | 0 | 0 | 1 | 0 | 0 | 0 | 0 | 0 | 1 | 3 |
| <u>MGC39900</u>  | 0 | 1 | 0 | 1 | 0 | 0 | 0 | 0 | 0 | 1 | 3 |
| <u>GRB10</u>     | 1 | 0 | 0 | 1 | 0 | 0 | 0 | 0 | 0 | 1 | 3 |
| <u>GRB10</u>     | 1 | 0 | 0 | 1 | 0 | 0 | 0 | 0 | 0 | 1 | 3 |
| <u>GRB10</u>     | 1 | 0 | 0 | 1 | 0 | 0 | 0 | 0 | 0 | 1 | 3 |
| <u>GRIA2</u>     | 1 | 0 | 0 | 1 | 0 | 0 | 0 | 0 | 0 | 1 | 3 |
| <u>GRIA2</u>     | 1 | 0 | 0 | 1 | 0 | 0 | 0 | 0 | 0 | 1 | 3 |
| <u>MRPL42</u>    | 1 | 1 | 0 | 1 | 0 | 0 | 0 | 0 | 0 | 0 | 3 |
| <u>GRIK3</u>     | 0 | 1 | 0 | 1 | 0 | 0 | 0 | 0 | 0 | 1 | 3 |
| <u>HIPK2</u>     | 0 | 1 | 0 | 1 | 0 | 0 | 0 | 0 | 0 | 1 | 3 |
| <u>GRIN2A</u>    | 1 | 1 | 0 | 1 | 0 | 0 | 0 | 0 | 0 | 0 | 3 |
| <u>NR3C1</u>     | 1 | 0 | 0 | 1 | 0 | 0 | 0 | 0 | 0 | 1 | 3 |
| <u>NR3C1</u>     | 1 | 0 | 0 | 1 | 0 | 0 | 0 | 0 | 0 | 1 | 3 |
| <u>NR3C1</u>     | 1 | 0 | 0 | 1 | 0 | 0 | 0 | 0 | 0 | 1 | 3 |
| <u>NR3C1</u>     | 1 | 0 | 0 | 1 | 0 | 0 | 0 | 0 | 0 | 1 | 3 |
| <u>GRLF1</u>     | 0 | 1 | 0 | 1 | 0 | 0 | 0 | 0 | 0 | 1 | 3 |
| <u>RNASEN</u>    | 1 | 0 | 0 | 1 | 0 | 0 | 0 | 0 | 0 | 1 | 3 |
| <u>TAGLN3</u>    | 1 | 1 | 0 | 1 | 0 | 0 | 0 | 0 | 0 | 0 | 3 |
| <u>RACGAP1</u>   | 1 | 1 | 0 | 1 | 0 | 0 | 0 | 0 | 0 | 0 | 3 |
| <u>CXCL1</u>     | 0 | 1 | 0 | 1 | 0 | 0 | 0 | 0 | 0 | 1 | 3 |

|                 |   |   |   |   |   |   |   |   |   |   |   |
|-----------------|---|---|---|---|---|---|---|---|---|---|---|
| <u>TMOD3</u>    | 1 | 1 | 0 | 1 | 0 | 0 | 0 | 0 | 0 | 0 | 3 |
| <u>GRHL1</u>    | 1 | 1 | 0 | 1 | 0 | 0 | 0 | 0 | 0 | 0 | 3 |
| <u>HIG2</u>     | 1 | 0 | 0 | 1 | 0 | 0 | 0 | 0 | 0 | 1 | 3 |
| <u>DSE</u>      | 1 | 0 | 0 | 1 | 0 | 0 | 0 | 0 | 0 | 1 | 3 |
| <u>PADI1</u>    | 1 | 1 | 0 | 1 | 0 | 0 | 0 | 0 | 0 | 0 | 3 |
| <u>SLC25A24</u> | 1 | 0 | 0 | 1 | 0 | 0 | 0 | 0 | 0 | 1 | 3 |
| <u>MDFIC</u>    | 1 | 1 | 0 | 1 | 0 | 0 | 0 | 0 | 0 | 0 | 3 |
| <u>NXPH1</u>    | 1 | 1 | 0 | 1 | 0 | 0 | 0 | 0 | 0 | 0 | 3 |
| <u>SH3KBP1</u>  | 1 | 1 | 0 | 1 | 0 | 0 | 0 | 0 | 0 | 0 | 3 |
| <u>EMR2</u>     | 1 | 0 | 0 | 1 | 0 | 0 | 0 | 0 | 0 | 1 | 3 |
| <u>EMR2</u>     | 1 | 0 | 0 | 1 | 0 | 0 | 0 | 0 | 0 | 1 | 3 |
| <u>EMR2</u>     | 1 | 0 | 0 | 1 | 0 | 0 | 0 | 0 | 0 | 1 | 3 |
| <u>EMR2</u>     | 1 | 0 | 0 | 1 | 0 | 0 | 0 | 0 | 0 | 1 | 3 |
| <u>CDR2L</u>    | 1 | 1 | 0 | 1 | 0 | 0 | 0 | 0 | 0 | 0 | 3 |
| <u>UBE2K</u>    | 0 | 1 | 0 | 1 | 0 | 0 | 0 | 0 | 0 | 1 | 3 |
| <u>HLA-B</u>    | 0 | 1 | 0 | 1 | 0 | 0 | 0 | 0 | 0 | 1 | 3 |
| <u>ANXA11</u>   | 1 | 0 | 0 | 1 | 0 | 0 | 0 | 0 | 0 | 1 | 3 |
| <u>ANXA11</u>   | 1 | 0 | 0 | 1 | 0 | 0 | 0 | 0 | 0 | 1 | 3 |
| <u>HMBS</u>     | 1 | 0 | 0 | 1 | 0 | 0 | 0 | 0 | 0 | 1 | 3 |
| <u>HMGB2</u>    | 1 | 0 | 0 | 1 | 0 | 0 | 0 | 0 | 0 | 1 | 3 |
| <u>HMGB2</u>    | 1 | 0 | 0 | 1 | 0 | 0 | 0 | 0 | 0 | 1 | 3 |
| <u>HMGCS1</u>   | 1 | 0 | 0 | 1 | 0 | 0 | 0 | 0 | 0 | 1 | 3 |
| <u>EIF4E3</u>   | 1 | 1 | 0 | 1 | 0 | 0 | 0 | 0 | 0 | 0 | 3 |
| <u>HNRNPC</u>   | 1 | 0 | 0 | 1 | 0 | 0 | 0 | 0 | 0 | 1 | 3 |
| <u>HOXA3</u>    | 1 | 0 | 0 | 1 | 0 | 0 | 0 | 0 | 0 | 1 | 3 |
| <u>HOXA3</u>    | 1 | 0 | 0 | 1 | 0 | 0 | 0 | 0 | 0 | 1 | 3 |
| <u>HOXA3</u>    | 0 | 1 | 0 | 1 | 0 | 0 | 0 | 0 | 0 | 1 | 3 |
| <u>HOXA7</u>    | 1 | 1 | 0 | 1 | 0 | 0 | 0 | 0 | 0 | 0 | 3 |
| <u>HRH1</u>     | 1 | 0 | 0 | 1 | 0 | 0 | 0 | 0 | 0 | 1 | 3 |
| <u>HRH1</u>     | 1 | 0 | 0 | 1 | 0 | 0 | 0 | 0 | 0 | 1 | 3 |
| <u>HRH1</u>     | 1 | 0 | 0 | 1 | 0 | 0 | 0 | 0 | 0 | 1 | 3 |
| <u>PRMT2</u>    | 0 | 1 | 0 | 1 | 0 | 0 | 0 | 0 | 0 | 1 | 3 |
| <u>HSD11B1</u>  | 1 | 0 | 0 | 1 | 0 | 0 | 0 | 0 | 0 | 1 | 3 |
| <u>BIRC5</u>    | 1 | 0 | 0 | 1 | 0 | 0 | 0 | 0 | 0 | 1 | 3 |
| <u>UBAC2</u>    | 1 | 0 | 0 | 1 | 0 | 0 | 0 | 0 | 0 | 1 | 3 |
| <u>C17orf51</u> | 0 | 1 | 0 | 1 | 0 | 0 | 0 | 0 | 0 | 1 | 3 |
| <u>ICT1</u>     | 1 | 1 | 0 | 1 | 0 | 0 | 0 | 0 | 0 | 0 | 3 |
| <u>C3orf35</u>  | 0 | 1 | 0 | 1 | 0 | 0 | 0 | 0 | 0 | 1 | 3 |
| <u>ZDHHC21</u>  | 1 | 1 | 0 | 1 | 0 | 0 | 0 | 0 | 0 | 0 | 3 |
| <u>C11orf53</u> | 1 | 1 | 0 | 1 | 0 | 0 | 0 | 0 | 0 | 0 | 3 |
| <u>STAC2</u>    | 1 | 1 | 0 | 1 | 0 | 0 | 0 | 0 | 0 | 0 | 3 |



|                  |   |   |   |   |   |   |   |   |   |   |   |
|------------------|---|---|---|---|---|---|---|---|---|---|---|
| <u>SH3MD4</u>    | 0 | 1 | 0 | 1 | 0 | 0 | 0 | 0 | 0 | 1 | 3 |
| <u>MTX3</u>      | 0 | 1 | 0 | 1 | 0 | 0 | 0 | 0 | 0 | 1 | 3 |
| <u>7A5</u>       | 0 | 1 | 0 | 1 | 0 | 0 | 0 | 0 | 0 | 1 | 3 |
| <u>IGF1</u>      | 1 | 0 | 0 | 1 | 0 | 0 | 0 | 0 | 0 | 1 | 3 |
| <u>IGFBP3</u>    | 1 | 1 | 0 | 1 | 0 | 0 | 0 | 0 | 0 | 0 | 3 |
| <u>SLCO4C1</u>   | 1 | 1 | 0 | 1 | 0 | 0 | 0 | 0 | 0 | 0 | 3 |
| <u>TICAM2</u>    | 0 | 1 | 0 | 1 | 0 | 0 | 0 | 0 | 0 | 1 | 3 |
| <u>IGLL1</u>     | 1 | 1 | 0 | 1 | 0 | 0 | 0 | 0 | 0 | 0 | 3 |
| <u>FAS</u>       | 1 | 0 | 0 | 1 | 0 | 0 | 0 | 0 | 0 | 1 | 3 |
| <u>FAS</u>       | 0 | 1 | 0 | 1 | 0 | 0 | 0 | 0 | 0 | 1 | 3 |
| <u>IL6ST</u>     | 1 | 1 | 0 | 1 | 0 | 0 | 0 | 0 | 0 | 0 | 3 |
| <u>IL10</u>      | 1 | 1 | 0 | 1 | 0 | 0 | 0 | 0 | 0 | 0 | 3 |
| <u>IL12B</u>     | 1 | 1 | 0 | 1 | 0 | 0 | 0 | 0 | 0 | 0 | 3 |
| <u>IL13RA2</u>   | 1 | 1 | 0 | 1 | 0 | 0 | 0 | 0 | 0 | 0 | 3 |
| <u>IL16</u>      | 1 | 0 | 0 | 1 | 0 | 0 | 0 | 0 | 0 | 1 | 3 |
| <u>INCENP</u>    | 1 | 0 | 0 | 1 | 0 | 0 | 0 | 0 | 0 | 1 | 3 |
| <u>ING1</u>      | 1 | 1 | 0 | 1 | 0 | 0 | 0 | 0 | 0 | 0 | 3 |
| <u>INSR</u>      | 1 | 0 | 0 | 1 | 0 | 0 | 0 | 0 | 0 | 1 | 3 |
| <u>ITGA6</u>     | 1 | 0 | 0 | 1 | 0 | 0 | 0 | 0 | 0 | 1 | 3 |
| <u>IRF5</u>      | 1 | 0 | 0 | 1 | 0 | 0 | 0 | 0 | 0 | 1 | 3 |
| <u>IRF5</u>      | 1 | 0 | 0 | 1 | 0 | 0 | 0 | 0 | 0 | 1 | 3 |
| <u>IRF5</u>      | 1 | 0 | 0 | 1 | 0 | 0 | 0 | 0 | 0 | 1 | 3 |
| <u>IRF5</u>      | 0 | 1 | 0 | 1 | 0 | 0 | 0 | 0 | 0 | 1 | 3 |
| <u>IRF5</u>      | 1 | 0 | 0 | 1 | 0 | 0 | 0 | 0 | 0 | 1 | 3 |
| <u>IVD</u>       | 0 | 1 | 0 | 1 | 0 | 0 | 0 | 0 | 0 | 1 | 3 |
| <u>TRIM23</u>    | 1 | 1 | 0 | 1 | 0 | 0 | 0 | 0 | 0 | 0 | 3 |
| <u>KCNC2</u>     | 1 | 0 | 0 | 1 | 0 | 0 | 0 | 0 | 0 | 1 | 3 |
| <u>C7orf52</u>   | 1 | 1 | 0 | 1 | 0 | 0 | 0 | 0 | 0 | 0 | 3 |
| <u>LHFPL3</u>    | 0 | 1 | 0 | 1 | 0 | 0 | 0 | 0 | 0 | 1 | 3 |
| <u>KCNJ1</u>     | 1 | 0 | 0 | 1 | 0 | 0 | 0 | 0 | 0 | 1 | 3 |
| <u>KCNJ1</u>     | 1 | 0 | 0 | 1 | 0 | 0 | 0 | 0 | 0 | 1 | 3 |
| <u>KCNJ1</u>     | 1 | 0 | 0 | 1 | 0 | 0 | 0 | 0 | 0 | 1 | 3 |
| <u>KCNJ1</u>     | 1 | 0 | 0 | 1 | 0 | 0 | 0 | 0 | 0 | 1 | 3 |
| <u>KCNMA1</u>    | 1 | 0 | 0 | 1 | 0 | 0 | 0 | 0 | 0 | 1 | 3 |
| <u>ARF6</u>      | 0 | 1 | 0 | 1 | 0 | 0 | 0 | 0 | 0 | 1 | 3 |
| <u>TNPO1</u>     | 1 | 0 | 0 | 1 | 0 | 0 | 0 | 0 | 0 | 1 | 3 |
| <u>NHLRC3</u>    | 1 | 0 | 0 | 1 | 0 | 0 | 0 | 0 | 0 | 1 | 3 |
| <u>LOC388610</u> | 0 | 1 | 0 | 1 | 0 | 0 | 0 | 0 | 0 | 1 | 3 |
| <u>KRT82</u>     | 1 | 1 | 0 | 1 | 0 | 0 | 0 | 0 | 0 | 0 | 3 |
| <u>LOC389073</u> | 1 | 1 | 0 | 1 | 0 | 0 | 0 | 0 | 0 | 0 | 3 |
| <u>LAMA3</u>     | 1 | 1 | 0 | 1 | 0 | 0 | 0 | 0 | 0 | 0 | 3 |

|                     |   |   |   |   |   |   |   |   |   |   |   |
|---------------------|---|---|---|---|---|---|---|---|---|---|---|
| <u>NUDT19</u>       | 0 | 1 | 0 | 1 | 0 | 0 | 0 | 0 | 0 | 1 | 3 |
| <u>TRIM61</u>       | 1 | 1 | 0 | 1 | 0 | 0 | 0 | 0 | 0 | 0 | 3 |
| <u>LAMC2</u>        | 1 | 1 | 0 | 1 | 0 | 0 | 0 | 0 | 0 | 0 | 3 |
| <u>LCP1</u>         | 1 | 1 | 0 | 1 | 0 | 0 | 0 | 0 | 0 | 0 | 3 |
| <u>ARHGAP5</u>      | 1 | 0 | 0 | 1 | 0 | 0 | 0 | 0 | 0 | 1 | 3 |
| <u>ARHGAP6</u>      | 1 | 1 | 0 | 1 | 0 | 0 | 0 | 0 | 0 | 0 | 3 |
| <u>LEP</u>          | 1 | 1 | 0 | 1 | 0 | 0 | 0 | 0 | 0 | 0 | 3 |
| <u>LIFR</u>         | 1 | 0 | 0 | 1 | 0 | 0 | 0 | 0 | 0 | 1 | 3 |
| <u>LIG4</u>         | 1 | 0 | 0 | 1 | 0 | 0 | 0 | 0 | 0 | 1 | 3 |
| <u>LIG4</u>         | 1 | 0 | 0 | 1 | 0 | 0 | 0 | 0 | 0 | 1 | 3 |
| <u>LIG4</u>         | 0 | 1 | 0 | 1 | 0 | 0 | 0 | 0 | 0 | 1 | 3 |
| <u>ABLIM1</u>       | 1 | 0 | 0 | 1 | 0 | 0 | 0 | 0 | 0 | 1 | 3 |
| <u>ABLIM1</u>       | 1 | 0 | 0 | 1 | 0 | 0 | 0 | 0 | 0 | 1 | 3 |
| <u>ABLIM1</u>       | 1 | 0 | 0 | 1 | 0 | 0 | 0 | 0 | 0 | 1 | 3 |
| <u>LIMK2</u>        | 1 | 1 | 0 | 1 | 0 | 0 | 0 | 0 | 0 | 0 | 3 |
| <u>FAM102A</u>      | 1 | 0 | 0 | 1 | 0 | 0 | 0 | 0 | 0 | 1 | 3 |
| <u>METTL10</u>      | 1 | 1 | 0 | 1 | 0 | 0 | 0 | 0 | 0 | 0 | 3 |
| <u>RP5-1103G7.6</u> | 1 | 1 | 0 | 1 | 0 | 0 | 0 | 0 | 0 | 0 | 3 |
| <u>LMX1B</u>        | 0 | 1 | 0 | 1 | 0 | 0 | 0 | 0 | 0 | 1 | 3 |
| <u>C8orf59</u>      | 0 | 1 | 0 | 1 | 0 | 0 | 0 | 0 | 0 | 1 | 3 |
| <u>LRP6</u>         | 0 | 1 | 0 | 1 | 0 | 0 | 0 | 0 | 0 | 1 | 3 |
| <u>TM4SF1</u>       | 1 | 1 | 0 | 1 | 0 | 0 | 0 | 0 | 0 | 0 | 3 |
| <u>SMAD2</u>        | 1 | 0 | 0 | 1 | 0 | 0 | 0 | 0 | 0 | 1 | 3 |
| <u>ARRB2</u>        | 1 | 0 | 0 | 1 | 0 | 0 | 0 | 0 | 0 | 1 | 3 |
| <u>MAGEA4</u>       | 1 | 0 | 0 | 1 | 0 | 0 | 0 | 0 | 0 | 1 | 3 |
| <u>MAGEA4</u>       | 1 | 0 | 0 | 1 | 0 | 0 | 0 | 0 | 0 | 1 | 3 |
| <u>MAGEA4</u>       | 1 | 0 | 0 | 1 | 0 | 0 | 0 | 0 | 0 | 1 | 3 |
| <u>MAGEB1</u>       | 1 | 1 | 0 | 1 | 0 | 0 | 0 | 0 | 0 | 0 | 3 |
| <u>MAP2</u>         | 1 | 0 | 0 | 1 | 0 | 0 | 0 | 0 | 0 | 1 | 3 |
| <u>MAP2</u>         | 1 | 0 | 0 | 1 | 0 | 0 | 0 | 0 | 0 | 1 | 3 |
| <u>MAP6</u>         | 0 | 1 | 0 | 1 | 0 | 0 | 0 | 0 | 0 | 1 | 3 |
| <u>MAPT</u>         | 1 | 0 | 0 | 1 | 0 | 0 | 0 | 0 | 0 | 1 | 3 |
| <u>MAPT</u>         | 1 | 0 | 0 | 1 | 0 | 0 | 0 | 0 | 0 | 1 | 3 |
| <u>MAPT</u>         | 1 | 0 | 0 | 1 | 0 | 0 | 0 | 0 | 0 | 1 | 3 |
| <u>MAPT</u>         | 1 | 0 | 0 | 1 | 0 | 0 | 0 | 0 | 0 | 1 | 3 |
| <u>MAPT</u>         | 1 | 0 | 0 | 1 | 0 | 0 | 0 | 0 | 0 | 1 | 3 |
| <u>MAPT</u>         | 1 | 0 | 0 | 1 | 0 | 0 | 0 | 0 | 0 | 1 | 3 |
| <u>MAPT</u>         | 1 | 0 | 0 | 1 | 0 | 0 | 0 | 0 | 0 | 1 | 3 |
| <u>MATN3</u>        | 0 | 1 | 0 | 1 | 0 | 0 | 0 | 0 | 0 | 1 | 3 |
| <u>MBNL1</u>        | 1 | 0 | 0 | 1 | 0 | 0 | 0 | 0 | 0 | 1 | 3 |
| <u>MBNL1</u>        | 1 | 0 | 0 | 1 | 0 | 0 | 0 | 0 | 0 | 1 | 3 |
| <u>MBNL1</u>        | 1 | 0 | 0 | 1 | 0 | 0 | 0 | 0 | 0 | 1 | 3 |
| <u>MBNL1</u>        | 1 | 0 | 0 | 1 | 0 | 0 | 0 | 0 | 0 | 1 | 3 |

|                |   |   |   |   |   |   |   |   |   |   |   |
|----------------|---|---|---|---|---|---|---|---|---|---|---|
| <u>MBNL1</u>   | 1 | 0 | 0 | 1 | 0 | 0 | 0 | 0 | 0 | 1 | 3 |
| <u>MBNL1</u>   | 1 | 0 | 0 | 1 | 0 | 0 | 0 | 0 | 0 | 1 | 3 |
| <u>MBP</u>     | 1 | 0 | 0 | 1 | 0 | 0 | 0 | 0 | 0 | 1 | 3 |
| <u>MBP</u>     | 1 | 0 | 0 | 1 | 0 | 0 | 0 | 0 | 0 | 1 | 3 |
| <u>MBP</u>     | 1 | 0 | 0 | 1 | 0 | 0 | 0 | 0 | 0 | 1 | 3 |
| <u>MBP</u>     | 1 | 0 | 0 | 1 | 0 | 0 | 0 | 0 | 0 | 1 | 3 |
| <u>MCC</u>     | 0 | 1 | 0 | 1 | 0 | 0 | 0 | 0 | 0 | 1 | 3 |
| <u>MCM3</u>    | 1 | 1 | 0 | 1 | 0 | 0 | 0 | 0 | 0 | 0 | 3 |
| <u>CD46</u>    | 1 | 0 | 0 | 1 | 0 | 0 | 0 | 0 | 0 | 1 | 3 |
| <u>CD46</u>    | 1 | 0 | 0 | 1 | 0 | 0 | 0 | 0 | 0 | 1 | 3 |
| <u>CD46</u>    | 1 | 0 | 0 | 1 | 0 | 0 | 0 | 0 | 0 | 1 | 3 |
| <u>CD46</u>    | 1 | 0 | 0 | 1 | 0 | 0 | 0 | 0 | 0 | 1 | 3 |
| <u>CD46</u>    | 1 | 0 | 0 | 1 | 0 | 0 | 0 | 0 | 0 | 1 | 3 |
| <u>CD46</u>    | 1 | 0 | 0 | 1 | 0 | 0 | 0 | 0 | 0 | 1 | 3 |
| <u>CD46</u>    | 0 | 1 | 0 | 1 | 0 | 0 | 0 | 0 | 0 | 1 | 3 |
| <u>CD46</u>    | 1 | 0 | 0 | 1 | 0 | 0 | 0 | 0 | 0 | 1 | 3 |
| <u>MEF2A</u>   | 1 | 1 | 0 | 1 | 0 | 0 | 0 | 0 | 0 | 0 | 3 |
| <u>MEST</u>    | 1 | 0 | 0 | 1 | 0 | 0 | 0 | 0 | 0 | 1 | 3 |
| <u>MEST</u>    | 1 | 0 | 0 | 1 | 0 | 0 | 0 | 0 | 0 | 1 | 3 |
| <u>MGAT3</u>   | 0 | 1 | 0 | 1 | 0 | 0 | 0 | 0 | 0 | 1 | 3 |
| <u>MGAT3</u>   | 1 | 0 | 0 | 1 | 0 | 0 | 0 | 0 | 0 | 1 | 3 |
| <u>KITLG</u>   | 1 | 0 | 0 | 1 | 0 | 0 | 0 | 0 | 0 | 1 | 3 |
| <u>ATXN3</u>   | 1 | 0 | 0 | 1 | 0 | 0 | 0 | 0 | 0 | 1 | 3 |
| <u>ATXN3</u>   | 1 | 0 | 0 | 1 | 0 | 0 | 0 | 0 | 0 | 1 | 3 |
| <u>ATXN3</u>   | 1 | 0 | 0 | 1 | 0 | 0 | 0 | 0 | 0 | 1 | 3 |
| <u>MKI67</u>   | 1 | 1 | 0 | 1 | 0 | 0 | 0 | 0 | 0 | 0 | 3 |
| <u>MLF1</u>    | 1 | 0 | 0 | 1 | 0 | 0 | 0 | 0 | 0 | 1 | 3 |
| <u>MLF1</u>    | 1 | 0 | 0 | 1 | 0 | 0 | 0 | 0 | 0 | 1 | 3 |
| <u>MME</u>     | 0 | 1 | 0 | 1 | 0 | 0 | 0 | 0 | 0 | 1 | 3 |
| <u>MMP13</u>   | 1 | 1 | 0 | 1 | 0 | 0 | 0 | 0 | 0 | 0 | 3 |
| <u>MN1</u>     | 1 | 1 | 0 | 1 | 0 | 0 | 0 | 0 | 0 | 0 | 3 |
| <u>MOBP</u>    | 1 | 1 | 0 | 1 | 0 | 0 | 0 | 0 | 0 | 0 | 3 |
| <u>MOCS2</u>   | 1 | 1 | 0 | 1 | 0 | 0 | 0 | 0 | 0 | 0 | 3 |
| <u>MOCS2</u>   | 1 | 1 | 0 | 1 | 0 | 0 | 0 | 0 | 0 | 0 | 3 |
| <u>MOG</u>     | 1 | 0 | 0 | 1 | 0 | 0 | 0 | 0 | 0 | 1 | 3 |
| <u>MOG</u>     | 1 | 0 | 0 | 1 | 0 | 0 | 0 | 0 | 0 | 1 | 3 |
| <u>MOG</u>     | 1 | 0 | 0 | 1 | 0 | 0 | 0 | 0 | 0 | 1 | 3 |
| <u>MOG</u>     | 0 | 1 | 0 | 1 | 0 | 0 | 0 | 0 | 0 | 1 | 3 |
| <u>EIF2AK4</u> | 1 | 1 | 0 | 1 | 0 | 0 | 0 | 0 | 0 | 0 | 3 |
| <u>UNC13C</u>  | 1 | 1 | 0 | 1 | 0 | 0 | 0 | 0 | 0 | 0 | 3 |
| <u>MSR1</u>    | 1 | 0 | 0 | 1 | 0 | 0 | 0 | 0 | 0 | 1 | 3 |

|                 |   |   |   |   |   |   |   |   |   |   |   |
|-----------------|---|---|---|---|---|---|---|---|---|---|---|
| <u>MTHFR</u>    | 1 | 1 | 0 | 1 | 0 | 0 | 0 | 0 | 0 | 0 | 3 |
| <u>MTM1</u>     | 1 | 1 | 0 | 1 | 0 | 0 | 0 | 0 | 0 | 0 | 3 |
| <u>MUT</u>      | 1 | 1 | 0 | 1 | 0 | 0 | 0 | 0 | 0 | 0 | 3 |
| <u>MYBL1</u>    | 0 | 1 | 0 | 1 | 0 | 0 | 0 | 0 | 0 | 1 | 3 |
| <u>MYBPC1</u>   | 0 | 0 | 0 | 1 | 1 | 1 | 0 | 0 | 0 | 0 | 3 |
| <u>MYL1</u>     | 1 | 1 | 0 | 1 | 0 | 0 | 0 | 0 | 0 | 0 | 3 |
| <u>MYO7B</u>    | 1 | 1 | 0 | 1 | 0 | 0 | 0 | 0 | 0 | 0 | 3 |
| <u>MYO10</u>    | 0 | 1 | 0 | 1 | 0 | 0 | 0 | 0 | 0 | 1 | 3 |
| <u>NAP1L2</u>   | 1 | 1 | 0 | 1 | 0 | 0 | 0 | 0 | 0 | 0 | 3 |
| <u>NBL1</u>     | 1 | 1 | 0 | 1 | 0 | 0 | 0 | 0 | 0 | 0 | 3 |
| <u>NCL</u>      | 1 | 1 | 0 | 1 | 0 | 0 | 0 | 0 | 0 | 0 | 3 |
| <u>NDUFB1</u>   | 0 | 1 | 0 | 1 | 1 | 0 | 0 | 0 | 0 | 0 | 3 |
| <u>RERE</u>     | 1 | 0 | 0 | 1 | 0 | 0 | 0 | 0 | 0 | 1 | 3 |
| <u>RERE</u>     | 1 | 0 | 0 | 1 | 0 | 0 | 0 | 0 | 0 | 1 | 3 |
| <u>SEPT2</u>    | 1 | 0 | 0 | 1 | 0 | 0 | 0 | 0 | 0 | 1 | 3 |
| <u>SEPT2</u>    | 1 | 0 | 0 | 1 | 0 | 0 | 0 | 0 | 0 | 1 | 3 |
| <u>SEPT2</u>    | 1 | 0 | 0 | 1 | 0 | 0 | 0 | 0 | 0 | 1 | 3 |
| <u>NEO1</u>     | 0 | 1 | 0 | 1 | 0 | 0 | 0 | 0 | 0 | 1 | 3 |
| <u>NF1</u>      | 1 | 0 | 0 | 1 | 0 | 0 | 0 | 0 | 0 | 1 | 3 |
| <u>NFATC4</u>   | 1 | 0 | 0 | 1 | 0 | 0 | 0 | 0 | 0 | 1 | 3 |
| <u>NFYC</u>     | 1 | 0 | 0 | 1 | 0 | 0 | 0 | 0 | 0 | 1 | 3 |
| <u>NOS1</u>     | 1 | 1 | 0 | 1 | 0 | 0 | 0 | 0 | 0 | 0 | 3 |
| <u>NOS3</u>     | 1 | 1 | 0 | 1 | 0 | 0 | 0 | 0 | 0 | 0 | 3 |
| <u>CNOT4</u>    | 0 | 1 | 0 | 1 | 0 | 0 | 0 | 0 | 0 | 1 | 3 |
| <u>NPM1</u>     | 0 | 0 | 0 | 1 | 1 | 1 | 0 | 0 | 0 | 0 | 3 |
| <u>NRCAM</u>    | 1 | 0 | 0 | 1 | 0 | 0 | 0 | 0 | 0 | 1 | 3 |
| <u>NRF1</u>     | 1 | 0 | 0 | 1 | 0 | 0 | 0 | 0 | 0 | 1 | 3 |
| <u>ROR2</u>     | 1 | 1 | 0 | 1 | 0 | 0 | 0 | 0 | 0 | 0 | 3 |
| <u>OCA2</u>     | 1 | 1 | 0 | 1 | 0 | 0 | 0 | 0 | 0 | 0 | 3 |
| <u>OGN</u>      | 1 | 0 | 0 | 1 | 0 | 0 | 0 | 0 | 0 | 1 | 3 |
| <u>ZNF295</u>   | 1 | 0 | 0 | 1 | 0 | 0 | 0 | 0 | 0 | 1 | 3 |
| <u>ZNF295</u>   | 1 | 0 | 0 | 1 | 0 | 0 | 0 | 0 | 0 | 1 | 3 |
| <u>SCAPER</u>   | 0 | 1 | 0 | 1 | 0 | 0 | 0 | 0 | 0 | 1 | 3 |
| <u>MINK1</u>    | 1 | 0 | 0 | 1 | 0 | 0 | 0 | 0 | 0 | 1 | 3 |
| <u>MINK1</u>    | 0 | 0 | 0 | 1 | 1 | 0 | 0 | 0 | 0 | 1 | 3 |
| <u>PAFAH1B2</u> | 1 | 1 | 0 | 1 | 0 | 0 | 0 | 0 | 0 | 0 | 3 |
| <u>DUOX2</u>    | 1 | 1 | 0 | 1 | 0 | 0 | 0 | 0 | 0 | 0 | 3 |
| <u>ITSN2</u>    | 1 | 0 | 0 | 1 | 0 | 0 | 0 | 0 | 0 | 1 | 3 |
| <u>ARHGEF3</u>  | 1 | 0 | 0 | 1 | 0 | 0 | 0 | 0 | 0 | 1 | 3 |
| <u>ARHGEF3</u>  | 1 | 0 | 0 | 1 | 0 | 0 | 0 | 0 | 0 | 1 | 3 |
| <u>PARK2</u>    | 1 | 0 | 0 | 1 | 0 | 0 | 0 | 0 | 0 | 1 | 3 |

|                |   |   |   |   |   |   |   |   |   |   |   |
|----------------|---|---|---|---|---|---|---|---|---|---|---|
| <u>PARK2</u>   | 1 | 0 | 0 | 1 | 0 | 0 | 0 | 0 | 0 | 1 | 3 |
| <u>PARN</u>    | 1 | 0 | 0 | 1 | 0 | 0 | 0 | 0 | 0 | 1 | 3 |
| <u>SPOCK3</u>  | 1 | 0 | 0 | 1 | 0 | 0 | 0 | 0 | 0 | 1 | 3 |
| <u>PDE11A</u>  | 1 | 0 | 0 | 1 | 0 | 0 | 0 | 0 | 0 | 1 | 3 |
| <u>PDE11A</u>  | 1 | 0 | 0 | 1 | 0 | 0 | 0 | 0 | 0 | 1 | 3 |
| <u>ACOX1</u>   | 1 | 0 | 0 | 1 | 0 | 0 | 0 | 0 | 0 | 1 | 3 |
| <u>SLC35C2</u> | 1 | 0 | 0 | 1 | 0 | 0 | 0 | 0 | 0 | 1 | 3 |
| <u>SLC35C2</u> | 1 | 0 | 0 | 1 | 0 | 0 | 0 | 0 | 0 | 1 | 3 |
| <u>GOLT1B</u>  | 1 | 1 | 0 | 1 | 0 | 0 | 0 | 0 | 0 | 0 | 3 |
| <u>KLHL5</u>   | 1 | 0 | 0 | 1 | 0 | 0 | 0 | 0 | 0 | 1 | 3 |
| <u>PHF20L1</u> | 1 | 0 | 0 | 1 | 0 | 0 | 0 | 0 | 0 | 1 | 3 |
| <u>METTL9</u>  | 1 | 1 | 0 | 1 | 0 | 0 | 0 | 0 | 0 | 0 | 3 |
| <u>GOLGA7</u>  | 1 | 0 | 0 | 1 | 0 | 0 | 0 | 0 | 0 | 1 | 3 |
| <u>ASB3</u>    | 1 | 0 | 0 | 1 | 0 | 0 | 0 | 0 | 0 | 1 | 3 |
| <u>IRAK4</u>   | 0 | 1 | 0 | 1 | 0 | 0 | 0 | 0 | 0 | 1 | 3 |
| <u>CYB5R4</u>  | 1 | 1 | 0 | 1 | 0 | 0 | 0 | 0 | 0 | 0 | 3 |
| <u>CLDN18</u>  | 1 | 0 | 0 | 1 | 0 | 0 | 0 | 0 | 0 | 1 | 3 |
| <u>PHF20</u>   | 1 | 1 | 0 | 1 | 0 | 0 | 0 | 0 | 0 | 0 | 3 |
| <u>VRK3</u>    | 1 | 0 | 0 | 1 | 0 | 0 | 0 | 0 | 0 | 1 | 3 |
| <u>KLF3</u>    | 0 | 1 | 0 | 1 | 0 | 0 | 0 | 0 | 0 | 1 | 3 |
| <u>C4orf18</u> | 1 | 1 | 0 | 1 | 0 | 0 | 0 | 0 | 0 | 0 | 3 |
| <u>PLAC8</u>   | 1 | 0 | 0 | 1 | 0 | 0 | 0 | 0 | 0 | 1 | 3 |
| <u>MRPL35</u>  | 1 | 1 | 0 | 1 | 0 | 0 | 0 | 0 | 0 | 0 | 3 |
| <u>SPG21</u>   | 1 | 0 | 0 | 1 | 0 | 0 | 0 | 0 | 0 | 1 | 3 |
| <u>SPG21</u>   | 1 | 0 | 0 | 1 | 0 | 0 | 0 | 0 | 0 | 1 | 3 |
| <u>DACT1</u>   | 1 | 1 | 0 | 1 | 0 | 0 | 0 | 0 | 0 | 0 | 3 |
| <u>ZNF117</u>  | 0 | 1 | 0 | 1 | 0 | 0 | 0 | 0 | 0 | 1 | 3 |
| <u>PDE2A</u>   | 1 | 1 | 0 | 1 | 0 | 0 | 0 | 0 | 0 | 0 | 3 |
| <u>WNT16</u>   | 1 | 0 | 0 | 1 | 0 | 0 | 0 | 0 | 0 | 1 | 3 |
| <u>PRKAG2</u>  | 1 | 0 | 0 | 1 | 0 | 0 | 0 | 0 | 0 | 1 | 3 |
| <u>PRKAG2</u>  | 1 | 0 | 0 | 1 | 0 | 0 | 0 | 0 | 0 | 1 | 3 |
| <u>UBE2J1</u>  | 0 | 1 | 0 | 1 | 0 | 0 | 0 | 0 | 0 | 1 | 3 |
| <u>TRIAP1</u>  | 1 | 1 | 0 | 1 | 0 | 0 | 0 | 0 | 0 | 0 | 3 |
| <u>VTA1</u>    | 1 | 1 | 0 | 1 | 0 | 0 | 0 | 0 | 0 | 0 | 3 |
| <u>ARMCX3</u>  | 1 | 0 | 0 | 1 | 0 | 0 | 0 | 0 | 0 | 1 | 3 |
| <u>ARMCX3</u>  | 0 | 1 | 0 | 1 | 0 | 0 | 0 | 0 | 0 | 1 | 3 |
| <u>TRIM33</u>  | 1 | 0 | 0 | 1 | 0 | 0 | 0 | 0 | 0 | 1 | 3 |
| <u>KLF13</u>   | 1 | 1 | 0 | 1 | 0 | 0 | 0 | 0 | 0 | 0 | 3 |
| <u>VPS24</u>   | 1 | 0 | 0 | 1 | 0 | 0 | 0 | 0 | 0 | 1 | 3 |
| <u>VPS24</u>   | 1 | 0 | 0 | 1 | 0 | 0 | 0 | 0 | 0 | 1 | 3 |
| <u>PDPK1</u>   | 1 | 0 | 0 | 1 | 0 | 0 | 0 | 0 | 0 | 1 | 3 |

|          |   |   |   |   |   |   |   |   |   |   |   |
|----------|---|---|---|---|---|---|---|---|---|---|---|
| ZNF44    | 1 | 0 | 0 | 1 | 0 | 0 | 0 | 0 | 0 | 1 | 3 |
| TM7SF3   | 0 | 1 | 0 | 1 | 0 | 0 | 0 | 0 | 0 | 1 | 3 |
| ZAK      | 1 | 0 | 0 | 1 | 0 | 0 | 0 | 0 | 0 | 1 | 3 |
| ACP1     | 0 | 1 | 0 | 1 | 0 | 0 | 0 | 0 | 0 | 1 | 3 |
| PHKA1    | 1 | 0 | 0 | 1 | 0 | 0 | 0 | 0 | 0 | 1 | 3 |
| SERPINI1 | 1 | 1 | 0 | 1 | 0 | 0 | 0 | 0 | 0 | 0 | 3 |
| PIGA     | 1 | 0 | 0 | 1 | 0 | 0 | 0 | 0 | 0 | 1 | 3 |
| PIK3C2A  | 0 | 1 | 0 | 1 | 0 | 0 | 0 | 0 | 0 | 1 | 3 |
| PKHD1    | 1 | 1 | 0 | 1 | 0 | 0 | 0 | 0 | 0 | 0 | 3 |
| PKP2     | 1 | 0 | 0 | 1 | 0 | 0 | 0 | 0 | 0 | 1 | 3 |
| PLA2G5   | 1 | 1 | 0 | 1 | 0 | 0 | 0 | 0 | 0 | 0 | 3 |
| PLAG1    | 1 | 0 | 0 | 1 | 0 | 0 | 0 | 0 | 0 | 1 | 3 |
| PANK1    | 1 | 0 | 0 | 1 | 0 | 0 | 0 | 0 | 0 | 1 | 3 |
| PANK1    | 1 | 0 | 0 | 1 | 0 | 0 | 0 | 0 | 0 | 1 | 3 |
| PLD1     | 1 | 0 | 0 | 1 | 0 | 0 | 0 | 0 | 0 | 1 | 3 |
| PLP1     | 1 | 0 | 0 | 1 | 1 | 0 | 0 | 0 | 0 | 0 | 3 |
| PLRG1    | 1 | 1 | 0 | 1 | 0 | 0 | 0 | 0 | 0 | 0 | 3 |
| ATP7B    | 1 | 0 | 0 | 1 | 0 | 0 | 0 | 0 | 0 | 1 | 3 |
| PODXL    | 1 | 0 | 0 | 1 | 0 | 0 | 0 | 0 | 0 | 1 | 3 |
| POLH     | 0 | 1 | 0 | 1 | 0 | 0 | 0 | 0 | 0 | 1 | 3 |
| GDAP1    | 1 | 0 | 0 | 1 | 0 | 0 | 0 | 0 | 0 | 1 | 3 |
| POMC     | 1 | 0 | 0 | 1 | 0 | 0 | 0 | 0 | 0 | 1 | 3 |
| DNAJC10  | 1 | 1 | 0 | 1 | 0 | 0 | 0 | 0 | 0 | 0 | 3 |
| RBM27    | 0 | 1 | 0 | 1 | 0 | 0 | 0 | 0 | 0 | 1 | 3 |
| XRN1     | 1 | 0 | 0 | 1 | 0 | 0 | 0 | 0 | 0 | 1 | 3 |
| NLE1     | 1 | 0 | 0 | 1 | 0 | 0 | 0 | 0 | 0 | 1 | 3 |
| CCDC93   | 1 | 1 | 0 | 1 | 0 | 0 | 0 | 0 | 0 | 0 | 3 |
| USP53    | 0 | 1 | 0 | 1 | 0 | 0 | 0 | 0 | 0 | 1 | 3 |
| GNL3L    | 1 | 1 | 0 | 1 | 0 | 0 | 0 | 0 | 0 | 0 | 3 |
| LZTFL1   | 1 | 1 | 0 | 1 | 0 | 0 | 0 | 0 | 0 | 0 | 3 |
| PPARA    | 1 | 0 | 0 | 1 | 0 | 0 | 0 | 0 | 0 | 1 | 3 |
| TMEM106B | 1 | 0 | 0 | 1 | 0 | 0 | 0 | 0 | 0 | 1 | 3 |
| PPM2C    | 1 | 0 | 0 | 1 | 0 | 0 | 0 | 0 | 0 | 1 | 3 |
| OTUD4    | 0 | 0 | 0 | 1 | 1 | 0 | 0 | 0 | 0 | 1 | 3 |
| TRIM44   | 0 | 1 | 0 | 1 | 0 | 0 | 0 | 0 | 0 | 1 | 3 |
| CNNM2    | 1 | 0 | 0 | 1 | 0 | 0 | 0 | 0 | 0 | 1 | 3 |
| GDAP2    | 1 | 1 | 0 | 1 | 0 | 0 | 0 | 0 | 0 | 0 | 3 |
| BIVM     | 1 | 0 | 0 | 1 | 0 | 0 | 0 | 0 | 0 | 1 | 3 |
| RBM35A   | 1 | 0 | 0 | 1 | 0 | 0 | 0 | 0 | 0 | 1 | 3 |
| RBM35A   | 1 | 0 | 0 | 1 | 0 | 0 | 0 | 0 | 0 | 1 | 3 |
| RBM35A   | 0 | 1 | 0 | 1 | 0 | 0 | 0 | 0 | 0 | 1 | 3 |

|                    |   |   |   |   |   |   |   |   |   |   |   |
|--------------------|---|---|---|---|---|---|---|---|---|---|---|
| <u>PAQR5</u>       | 1 | 0 | 0 | 1 | 0 | 0 | 0 | 0 | 0 | 1 | 3 |
| <u>GON4L</u>       | 1 | 1 | 0 | 1 | 0 | 0 | 0 | 0 | 0 | 0 | 3 |
| <u>bA16L21.2.1</u> | 1 | 1 | 0 | 1 | 0 | 0 | 0 | 0 | 0 | 0 | 3 |
| <u>RP11-35N6.1</u> | 1 | 1 | 0 | 1 | 0 | 0 | 0 | 0 | 0 | 0 | 3 |
| <u>FLJ20309</u>    | 0 | 1 | 0 | 1 | 0 | 0 | 0 | 0 | 0 | 1 | 3 |
| <u>MTMR10</u>      | 0 | 1 | 0 | 1 | 0 | 0 | 0 | 0 | 0 | 1 | 3 |
| <u>LAX1</u>        | 1 | 1 | 0 | 1 | 0 | 0 | 0 | 0 | 0 | 0 | 3 |
| <u>RASIP1</u>      | 1 | 1 | 0 | 1 | 0 | 0 | 0 | 0 | 0 | 0 | 3 |
| <u>UBE2R2</u>      | 1 | 1 | 0 | 1 | 0 | 0 | 0 | 0 | 0 | 0 | 3 |
| <u>PPL</u>         | 1 | 1 | 0 | 1 | 0 | 0 | 0 | 0 | 0 | 0 | 3 |
| <u>RG9MTD1</u>     | 0 | 1 | 0 | 1 | 0 | 0 | 0 | 0 | 0 | 1 | 3 |
| <u>OCIAD1</u>      | 1 | 0 | 0 | 1 | 0 | 0 | 0 | 0 | 0 | 1 | 3 |
| <u>OCIAD1</u>      | 1 | 0 | 0 | 1 | 0 | 0 | 0 | 0 | 0 | 1 | 3 |
| <u>OCIAD1</u>      | 1 | 0 | 0 | 1 | 0 | 0 | 0 | 0 | 0 | 1 | 3 |
| <u>LPCAT2</u>      | 0 | 1 | 0 | 1 | 0 | 0 | 0 | 0 | 0 | 1 | 3 |
| <u>C2orf42</u>     | 1 | 1 | 0 | 1 | 0 | 0 | 0 | 0 | 0 | 0 | 3 |
| <u>PRPF39</u>      | 1 | 1 | 0 | 1 | 0 | 0 | 0 | 0 | 0 | 0 | 3 |
| <u>BANK1</u>       | 1 | 0 | 0 | 1 | 0 | 0 | 0 | 0 | 0 | 1 | 3 |
| <u>BANK1</u>       | 1 | 0 | 0 | 1 | 0 | 0 | 0 | 0 | 0 | 1 | 3 |
| <u>FAM70A</u>      | 1 | 0 | 0 | 1 | 0 | 0 | 0 | 0 | 0 | 1 | 3 |
| <u>FAM70A</u>      | 1 | 0 | 0 | 1 | 0 | 0 | 0 | 0 | 0 | 1 | 3 |
| <u>ATG16L1</u>     | 1 | 0 | 0 | 1 | 0 | 0 | 0 | 0 | 0 | 1 | 3 |
| <u>C9orf68</u>     | 0 | 1 | 0 | 1 | 0 | 0 | 0 | 0 | 0 | 1 | 3 |
| <u>MED9</u>        | 1 | 1 | 0 | 1 | 0 | 0 | 0 | 0 | 0 | 0 | 3 |
| <u>SAMD4B</u>      | 1 | 1 | 0 | 1 | 0 | 0 | 0 | 0 | 0 | 0 | 3 |
| <u>RALGPS2</u>     | 1 | 1 | 0 | 1 | 0 | 0 | 0 | 0 | 0 | 0 | 3 |
| <u>LRRC8D</u>      | 1 | 0 | 0 | 1 | 0 | 0 | 0 | 0 | 0 | 1 | 3 |
| <u>DALRD3</u>      | 1 | 1 | 0 | 1 | 0 | 0 | 0 | 0 | 0 | 0 | 3 |
| <u>SDAD1</u>       | 1 | 1 | 0 | 1 | 0 | 0 | 0 | 0 | 0 | 0 | 3 |
| <u>SLC25A36</u>    | 0 | 1 | 0 | 1 | 0 | 0 | 0 | 0 | 0 | 1 | 3 |
| <u>VPS13D</u>      | 1 | 1 | 0 | 1 | 0 | 0 | 0 | 0 | 0 | 0 | 3 |
| <u>PBRM1</u>       | 1 | 0 | 0 | 1 | 0 | 0 | 0 | 0 | 0 | 1 | 3 |
| <u>PBRM1</u>       | 1 | 0 | 0 | 1 | 0 | 0 | 0 | 0 | 0 | 1 | 3 |
| <u>PPP2R3A</u>     | 1 | 0 | 0 | 1 | 0 | 0 | 0 | 0 | 0 | 1 | 3 |
| <u>TMEM206</u>     | 1 | 1 | 0 | 1 | 0 | 0 | 0 | 0 | 0 | 0 | 3 |
| <u>PSPC1</u>       | 0 | 1 | 0 | 1 | 0 | 0 | 0 | 0 | 0 | 1 | 3 |
| <u>UBE2W</u>       | 1 | 0 | 0 | 1 | 0 | 0 | 0 | 0 | 0 | 1 | 3 |
| <u>FLJ11151</u>    | 0 | 1 | 0 | 1 | 0 | 0 | 0 | 0 | 0 | 1 | 3 |
| <u>HEMGN</u>       | 1 | 0 | 0 | 1 | 0 | 0 | 0 | 0 | 0 | 1 | 3 |
| <u>MCM10</u>       | 1 | 0 | 0 | 1 | 0 | 0 | 0 | 0 | 0 | 1 | 3 |
| <u>DNAJA4</u>      | 1 | 0 | 0 | 1 | 0 | 0 | 0 | 0 | 0 | 1 | 3 |

|                   |   |   |   |   |   |   |   |   |   |   |   |
|-------------------|---|---|---|---|---|---|---|---|---|---|---|
| <u>DNAJA4</u>     | 1 | 0 | 0 | 1 | 0 | 0 | 0 | 0 | 0 | 1 | 3 |
| <u>PRCP</u>       | 1 | 0 | 0 | 1 | 0 | 0 | 0 | 0 | 0 | 1 | 3 |
| <u>SLC30A10</u>   | 1 | 1 | 0 | 1 | 0 | 0 | 0 | 0 | 0 | 0 | 3 |
| <u>RBM38</u>      | 1 | 1 | 0 | 1 | 0 | 0 | 0 | 0 | 0 | 0 | 3 |
| <u>RBM38</u>      | 1 | 1 | 0 | 1 | 0 | 0 | 0 | 0 | 0 | 0 | 3 |
| <u>SOX6</u>       | 1 | 0 | 0 | 1 | 0 | 0 | 0 | 0 | 0 | 1 | 3 |
| <u>PLXNA3</u>     | 1 | 1 | 0 | 1 | 0 | 0 | 0 | 0 | 0 | 0 | 3 |
| <u>BMP2K</u>      | 1 | 0 | 0 | 1 | 0 | 0 | 0 | 0 | 0 | 1 | 3 |
| <u>ITLN1</u>      | 1 | 1 | 0 | 1 | 0 | 0 | 0 | 0 | 0 | 0 | 3 |
| <u>DDX60</u>      | 1 | 0 | 0 | 1 | 0 | 0 | 0 | 0 | 0 | 1 | 3 |
| <u>PPP1R9A</u>    | 1 | 0 | 0 | 1 | 0 | 0 | 0 | 0 | 0 | 1 | 3 |
| <u>PRKAA2</u>     | 0 | 1 | 0 | 1 | 0 | 0 | 0 | 0 | 0 | 1 | 3 |
| <u>ZNF673</u>     | 1 | 0 | 0 | 1 | 0 | 0 | 0 | 0 | 0 | 1 | 3 |
| <u>ZNF673</u>     | 1 | 0 | 0 | 1 | 0 | 0 | 0 | 0 | 0 | 1 | 3 |
| <u>RAB20</u>      | 1 | 1 | 0 | 1 | 0 | 0 | 0 | 0 | 0 | 0 | 3 |
| <u>PRPF40A</u>    | 0 | 1 | 0 | 1 | 0 | 0 | 0 | 0 | 0 | 1 | 3 |
| <u>KIAA1310</u>   | 1 | 1 | 0 | 1 | 0 | 0 | 0 | 0 | 0 | 0 | 3 |
| <u>ASF1B</u>      | 1 | 1 | 0 | 1 | 0 | 0 | 0 | 0 | 0 | 0 | 3 |
| <u>C17orf63</u>   | 0 | 1 | 0 | 1 | 0 | 0 | 0 | 0 | 0 | 1 | 3 |
| <u>PARVA</u>      | 1 | 1 | 0 | 1 | 0 | 0 | 0 | 0 | 0 | 0 | 3 |
| <u>ZNF83</u>      | 1 | 0 | 0 | 1 | 0 | 0 | 0 | 0 | 0 | 1 | 3 |
| <u>PRKAR2B</u>    | 1 | 1 | 0 | 1 | 0 | 0 | 0 | 0 | 0 | 0 | 3 |
| <u>FLJ11171</u>   | 1 | 0 | 0 | 1 | 0 | 0 | 0 | 0 | 0 | 1 | 3 |
| <u>CSGALNACT1</u> | 1 | 0 | 0 | 1 | 0 | 0 | 0 | 0 | 0 | 1 | 3 |
| <u>SCN3B</u>      | 1 | 0 | 0 | 1 | 0 | 0 | 0 | 0 | 0 | 1 | 3 |
| <u>TRERF1</u>     | 1 | 1 | 0 | 1 | 0 | 0 | 0 | 0 | 0 | 0 | 3 |
| <u>FOXJ2</u>      | 1 | 1 | 0 | 1 | 0 | 0 | 0 | 0 | 0 | 0 | 3 |
| <u>BDP1</u>       | 1 | 1 | 0 | 1 | 0 | 0 | 0 | 0 | 0 | 0 | 3 |
| <u>IQWD1</u>      | 1 | 1 | 0 | 1 | 0 | 0 | 0 | 0 | 0 | 0 | 3 |
| <u>CAND1</u>      | 1 | 1 | 0 | 1 | 0 | 0 | 0 | 0 | 0 | 0 | 3 |
| <u>MLL5</u>       | 1 | 0 | 0 | 1 | 0 | 0 | 0 | 0 | 0 | 1 | 3 |
| <u>PRKG1</u>      | 1 | 0 | 0 | 1 | 0 | 0 | 0 | 0 | 0 | 1 | 3 |
| <u>C20orf24</u>   | 1 | 1 | 0 | 1 | 0 | 0 | 0 | 0 | 0 | 0 | 3 |
| <u>C20orf24</u>   | 1 | 1 | 0 | 1 | 0 | 0 | 0 | 0 | 0 | 0 | 3 |
| <u>SLC25A40</u>   | 1 | 1 | 0 | 1 | 0 | 0 | 0 | 0 | 0 | 0 | 3 |
| <u>FAM54B</u>     | 1 | 0 | 0 | 1 | 0 | 0 | 0 | 0 | 0 | 1 | 3 |
| <u>FAM54B</u>     | 1 | 0 | 0 | 1 | 0 | 0 | 0 | 0 | 0 | 1 | 3 |
| <u>FAM54B</u>     | 1 | 0 | 0 | 1 | 0 | 0 | 0 | 0 | 0 | 1 | 3 |
| <u>PRM1</u>       | 1 | 1 | 0 | 1 | 0 | 0 | 0 | 0 | 0 | 0 | 3 |
| <u>YLPM1</u>      | 0 | 1 | 0 | 1 | 0 | 0 | 0 | 0 | 0 | 1 | 3 |
| <u>LRR8A</u>      | 1 | 1 | 0 | 1 | 0 | 0 | 0 | 0 | 0 | 0 | 3 |



|                 |   |   |   |   |   |   |   |   |   |   |   |
|-----------------|---|---|---|---|---|---|---|---|---|---|---|
| <u>PRRG1</u>    | 1 | 0 | 0 | 1 | 0 | 0 | 0 | 0 | 0 | 1 | 3 |
| <u>KLK7</u>     | 0 | 1 | 0 | 1 | 0 | 0 | 0 | 0 | 0 | 1 | 3 |
| <u>PSAP</u>     | 1 | 0 | 0 | 1 | 0 | 0 | 0 | 0 | 0 | 1 | 3 |
| <u>KCNK13</u>   | 1 | 1 | 0 | 1 | 0 | 0 | 0 | 0 | 0 | 0 | 3 |
| <u>JPH1</u>     | 1 | 1 | 0 | 1 | 0 | 0 | 0 | 0 | 0 | 0 | 3 |
| <u>PSG3</u>     | 0 | 1 | 0 | 1 | 0 | 0 | 0 | 0 | 0 | 1 | 3 |
| <u>PSG5</u>     | 0 | 1 | 0 | 1 | 0 | 0 | 0 | 0 | 0 | 1 | 3 |
| <u>PSG11</u>    | 0 | 1 | 0 | 1 | 0 | 0 | 0 | 0 | 0 | 1 | 3 |
| <u>KCMF1</u>    | 0 | 1 | 0 | 1 | 0 | 0 | 0 | 0 | 0 | 1 | 3 |
| <u>AGPAT3</u>   | 1 | 0 | 0 | 1 | 0 | 0 | 0 | 0 | 0 | 1 | 3 |
| <u>ANKS1B</u>   | 1 | 0 | 0 | 1 | 1 | 0 | 0 | 0 | 0 | 0 | 3 |
| <u>C1orf119</u> | 0 | 1 | 0 | 1 | 0 | 0 | 0 | 0 | 0 | 1 | 3 |
| <u>PAPOLB</u>   | 0 | 1 | 0 | 1 | 0 | 0 | 0 | 0 | 0 | 1 | 3 |
| <u>SPIRE1</u>   | 1 | 0 | 0 | 1 | 0 | 0 | 0 | 0 | 0 | 1 | 3 |
| <u>SMARCAD1</u> | 1 | 0 | 0 | 1 | 0 | 0 | 0 | 0 | 0 | 1 | 3 |
| <u>SMARCAD1</u> | 1 | 0 | 0 | 1 | 0 | 0 | 0 | 0 | 0 | 1 | 3 |
| <u>MEPE</u>     | 0 | 1 | 0 | 1 | 0 | 0 | 0 | 0 | 0 | 1 | 3 |
| <u>PRDM10</u>   | 1 | 0 | 0 | 1 | 1 | 0 | 0 | 0 | 0 | 0 | 3 |
| <u>PRDM10</u>   | 1 | 0 | 0 | 1 | 1 | 0 | 0 | 0 | 0 | 0 | 3 |
| <u>PRDM10</u>   | 1 | 0 | 0 | 1 | 1 | 0 | 0 | 0 | 0 | 0 | 3 |
| <u>KTELC1</u>   | 1 | 1 | 0 | 1 | 0 | 0 | 0 | 0 | 0 | 0 | 3 |
| <u>ENTPD7</u>   | 0 | 1 | 0 | 1 | 0 | 0 | 0 | 0 | 0 | 1 | 3 |
| <u>CPA6</u>     | 1 | 1 | 0 | 1 | 0 | 0 | 0 | 0 | 0 | 0 | 3 |
| <u>BACH1</u>    | 1 | 1 | 0 | 1 | 0 | 0 | 0 | 0 | 0 | 0 | 3 |
| <u>GOPC</u>     | 1 | 0 | 0 | 1 | 0 | 0 | 0 | 0 | 0 | 1 | 3 |
| <u>LYRM1</u>    | 1 | 0 | 0 | 1 | 0 | 0 | 0 | 0 | 0 | 1 | 3 |
| <u>LYRM1</u>    | 1 | 0 | 0 | 1 | 0 | 0 | 0 | 0 | 0 | 1 | 3 |
| <u>C6orf162</u> | 1 | 1 | 0 | 1 | 0 | 0 | 0 | 0 | 0 | 0 | 3 |
| <u>SMURF1</u>   | 1 | 1 | 0 | 1 | 0 | 0 | 0 | 0 | 0 | 0 | 3 |
| <u>PHTF2</u>    | 1 | 0 | 0 | 1 | 0 | 0 | 0 | 0 | 0 | 1 | 3 |
| <u>PHTF2</u>    | 1 | 0 | 0 | 1 | 0 | 0 | 0 | 0 | 0 | 1 | 3 |
| <u>KIAA1191</u> | 1 | 1 | 0 | 1 | 0 | 0 | 0 | 0 | 0 | 0 | 3 |
| <u>SLC39A10</u> | 1 | 0 | 0 | 1 | 0 | 0 | 0 | 0 | 0 | 1 | 3 |
| <u>PSMD13</u>   | 1 | 1 | 0 | 1 | 0 | 0 | 0 | 0 | 0 | 0 | 3 |
| <u>ZNF248</u>   | 0 | 1 | 0 | 1 | 0 | 0 | 0 | 0 | 0 | 1 | 3 |
| <u>GPR126</u>   | 1 | 0 | 0 | 1 | 0 | 0 | 0 | 0 | 0 | 1 | 3 |
| <u>SMEK2</u>    | 1 | 1 | 0 | 1 | 0 | 0 | 0 | 0 | 0 | 0 | 3 |
| <u>LYRM2</u>    | 0 | 1 | 0 | 1 | 0 | 0 | 0 | 0 | 0 | 1 | 3 |
| <u>PTCH1</u>    | 0 | 1 | 0 | 1 | 0 | 0 | 0 | 0 | 0 | 1 | 3 |
| <u>NDRG3</u>    | 1 | 0 | 0 | 1 | 0 | 0 | 0 | 0 | 0 | 1 | 3 |
| <u>NDRG2</u>    | 1 | 0 | 0 | 1 | 0 | 0 | 0 | 0 | 0 | 1 | 3 |

|                 |   |   |   |   |   |   |   |   |   |   |   |
|-----------------|---|---|---|---|---|---|---|---|---|---|---|
| <u>NDRG2</u>    | 1 | 0 | 0 | 1 | 0 | 0 | 0 | 0 | 0 | 1 | 3 |
| <u>NDRG2</u>    | 1 | 0 | 0 | 1 | 0 | 0 | 0 | 0 | 0 | 1 | 3 |
| <u>NDRG2</u>    | 1 | 0 | 0 | 1 | 0 | 0 | 0 | 0 | 0 | 1 | 3 |
| <u>NDRG2</u>    | 1 | 0 | 0 | 1 | 0 | 0 | 0 | 0 | 0 | 1 | 3 |
| <u>NDRG2</u>    | 1 | 0 | 0 | 1 | 0 | 0 | 0 | 0 | 0 | 1 | 3 |
| <u>SLC12A5</u>  | 1 | 0 | 0 | 1 | 0 | 0 | 0 | 0 | 0 | 1 | 3 |
| <u>ERMN</u>     | 1 | 0 | 0 | 1 | 0 | 0 | 0 | 0 | 0 | 1 | 3 |
| <u>USP31</u>    | 0 | 1 | 0 | 1 | 0 | 0 | 0 | 0 | 0 | 1 | 3 |
| <u>NLGN4X</u>   | 1 | 1 | 0 | 1 | 0 | 0 | 0 | 0 | 0 | 0 | 3 |
| <u>MTUS1</u>    | 1 | 0 | 0 | 1 | 0 | 0 | 0 | 0 | 0 | 1 | 3 |
| <u>MTUS1</u>    | 1 | 0 | 0 | 1 | 0 | 0 | 0 | 0 | 0 | 1 | 3 |
| <u>MTUS1</u>    | 1 | 0 | 0 | 1 | 0 | 0 | 0 | 0 | 0 | 1 | 3 |
| <u>PCDH19</u>   | 1 | 0 | 0 | 1 | 0 | 0 | 0 | 0 | 0 | 1 | 3 |
| <u>NUFIP2</u>   | 0 | 1 | 0 | 1 | 0 | 0 | 0 | 0 | 0 | 1 | 3 |
| <u>TBC1D14</u>  | 1 | 0 | 0 | 1 | 0 | 0 | 0 | 0 | 0 | 1 | 3 |
| <u>TBC1D14</u>  | 1 | 0 | 0 | 1 | 0 | 0 | 0 | 0 | 0 | 1 | 3 |
| <u>ZNF398</u>   | 1 | 0 | 0 | 1 | 0 | 0 | 0 | 0 | 0 | 1 | 3 |
| <u>AADACL1</u>  | 1 | 0 | 0 | 1 | 0 | 0 | 0 | 0 | 0 | 1 | 3 |
| <u>STAMBPL1</u> | 0 | 1 | 0 | 1 | 0 | 0 | 0 | 0 | 0 | 1 | 3 |
| <u>KIAA1377</u> | 1 | 1 | 0 | 1 | 0 | 0 | 0 | 0 | 0 | 0 | 3 |
| <u>FAM135A</u>  | 1 | 0 | 0 | 1 | 0 | 0 | 0 | 0 | 0 | 1 | 3 |
| <u>FAM135A</u>  | 1 | 0 | 0 | 1 | 0 | 0 | 0 | 0 | 0 | 1 | 3 |
| <u>KIAA1549</u> | 0 | 1 | 0 | 1 | 0 | 0 | 0 | 0 | 0 | 1 | 3 |
| <u>CACHD1</u>   | 1 | 1 | 0 | 1 | 0 | 0 | 0 | 0 | 0 | 0 | 3 |
| <u>ZNF317</u>   | 1 | 1 | 0 | 1 | 0 | 0 | 0 | 0 | 0 | 0 | 3 |
| <u>NOPE</u>     | 1 | 1 | 0 | 1 | 0 | 0 | 0 | 0 | 0 | 0 | 3 |
| <u>SF4</u>      | 1 | 1 | 0 | 1 | 0 | 0 | 0 | 0 | 0 | 0 | 3 |
| <u>CYP4F11</u>  | 1 | 1 | 0 | 1 | 0 | 0 | 0 | 0 | 0 | 0 | 3 |
| <u>PTPRB</u>    | 1 | 0 | 0 | 1 | 0 | 0 | 0 | 0 | 0 | 1 | 3 |
| <u>PTPRC</u>    | 1 | 0 | 0 | 1 | 0 | 0 | 0 | 0 | 0 | 1 | 3 |
| <u>PTPRD</u>    | 1 | 1 | 0 | 1 | 0 | 0 | 0 | 0 | 0 | 0 | 3 |
| <u>PTPRE</u>    | 1 | 0 | 0 | 1 | 0 | 0 | 0 | 0 | 0 | 1 | 3 |
| <u>PWP2</u>     | 0 | 1 | 0 | 1 | 0 | 0 | 0 | 0 | 0 | 1 | 3 |
| <u>PXMP2</u>    | 0 | 1 | 0 | 1 | 0 | 0 | 0 | 0 | 0 | 1 | 3 |
| <u>RHOU</u>     | 1 | 1 | 0 | 1 | 0 | 0 | 0 | 0 | 0 | 0 | 3 |
| <u>CREBZF</u>   | 0 | 1 | 0 | 1 | 0 | 0 | 0 | 0 | 0 | 1 | 3 |
| <u>C6orf115</u> | 1 | 1 | 0 | 1 | 0 | 0 | 0 | 0 | 0 | 0 | 3 |
| <u>RRAGD</u>    | 1 | 1 | 0 | 1 | 0 | 0 | 0 | 0 | 0 | 0 | 3 |
| <u>RAG1</u>     | 1 | 1 | 0 | 1 | 0 | 0 | 0 | 0 | 0 | 0 | 3 |
| <u>PLEKHA1</u>  | 1 | 0 | 0 | 1 | 0 | 0 | 0 | 0 | 0 | 1 | 3 |
| <u>RBL2</u>     | 1 | 1 | 0 | 1 | 0 | 0 | 0 | 0 | 0 | 0 | 3 |

|                  |   |   |   |   |   |   |   |   |   |   |   |
|------------------|---|---|---|---|---|---|---|---|---|---|---|
| <u>RBMS2</u>     | 0 | 1 | 0 | 1 | 0 | 0 | 0 | 0 | 0 | 1 | 3 |
| <u>RECQL</u>     | 1 | 0 | 0 | 1 | 0 | 0 | 0 | 0 | 0 | 1 | 3 |
| <u>BCL2L2</u>    | 1 | 1 | 0 | 1 | 0 | 0 | 0 | 0 | 0 | 0 | 3 |
| <u>RGS13</u>     | 1 | 0 | 0 | 1 | 0 | 0 | 0 | 0 | 0 | 1 | 3 |
| <u>RGS13</u>     | 0 | 1 | 0 | 1 | 0 | 0 | 0 | 0 | 0 | 1 | 3 |
| <u>RIT1</u>      | 1 | 1 | 0 | 1 | 0 | 0 | 0 | 0 | 0 | 0 | 3 |
| <u>BCL6</u>      | 1 | 0 | 0 | 1 | 0 | 0 | 0 | 0 | 0 | 1 | 3 |
| <u>RNF6</u>      | 1 | 0 | 0 | 1 | 0 | 0 | 0 | 0 | 0 | 1 | 3 |
| <u>RNF6</u>      | 1 | 0 | 0 | 1 | 0 | 0 | 0 | 0 | 0 | 1 | 3 |
| <u>HPSE2</u>     | 1 | 1 | 0 | 1 | 0 | 0 | 0 | 0 | 0 | 0 | 3 |
| <u>DHX35</u>     | 1 | 1 | 0 | 1 | 0 | 0 | 0 | 0 | 0 | 0 | 3 |
| <u>ROBO2</u>     | 1 | 0 | 0 | 1 | 0 | 0 | 0 | 0 | 0 | 1 | 3 |
| <u>BDH1</u>      | 1 | 1 | 0 | 1 | 0 | 0 | 0 | 0 | 0 | 0 | 3 |
| <u>RTN1</u>      | 1 | 1 | 0 | 1 | 0 | 0 | 0 | 0 | 0 | 0 | 3 |
| <u>SC5DL</u>     | 1 | 0 | 0 | 1 | 0 | 0 | 0 | 0 | 0 | 1 | 3 |
| <u>SCN2B</u>     | 1 | 1 | 0 | 1 | 0 | 0 | 0 | 0 | 0 | 0 | 3 |
| <u>SCN9A</u>     | 0 | 1 | 0 | 1 | 0 | 0 | 0 | 0 | 0 | 1 | 3 |
| <u>CXCL12</u>    | 0 | 1 | 0 | 1 | 0 | 0 | 0 | 0 | 0 | 1 | 3 |
| <u>C10orf84</u>  | 1 | 0 | 0 | 1 | 0 | 0 | 0 | 0 | 0 | 1 | 3 |
| <u>PRDM1</u>     | 1 | 0 | 0 | 1 | 0 | 0 | 0 | 0 | 0 | 1 | 3 |
| <u>ANKRD5</u>    | 1 | 0 | 0 | 1 | 0 | 0 | 0 | 0 | 0 | 1 | 3 |
| <u>FIGNL1</u>    | 1 | 1 | 0 | 1 | 0 | 0 | 0 | 0 | 0 | 0 | 3 |
| <u>PERP</u>      | 0 | 1 | 0 | 1 | 0 | 0 | 0 | 0 | 0 | 1 | 3 |
| <u>NPAS3</u>     | 1 | 1 | 0 | 1 | 0 | 0 | 0 | 0 | 0 | 0 | 3 |
| <u>ZNF674</u>    | 0 | 1 | 0 | 1 | 0 | 0 | 0 | 0 | 0 | 1 | 3 |
| <u>SPATA1</u>    | 0 | 1 | 0 | 1 | 0 | 0 | 0 | 0 | 0 | 1 | 3 |
| <u>SFRP5</u>     | 1 | 1 | 0 | 1 | 0 | 0 | 0 | 0 | 0 | 0 | 3 |
| <u>SFRS1</u>     | 0 | 1 | 0 | 1 | 0 | 0 | 0 | 0 | 0 | 1 | 3 |
| <u>SFRS3</u>     | 1 | 1 | 0 | 1 | 0 | 0 | 0 | 0 | 0 | 0 | 3 |
| <u>PAPD5</u>     | 1 | 0 | 0 | 1 | 0 | 0 | 0 | 0 | 0 | 1 | 3 |
| <u>SFRS5</u>     | 1 | 0 | 0 | 1 | 0 | 0 | 0 | 0 | 0 | 1 | 3 |
| <u>ZFP106</u>    | 1 | 1 | 0 | 1 | 0 | 0 | 0 | 0 | 0 | 0 | 3 |
| <u>LOC644096</u> | 1 | 1 | 0 | 1 | 0 | 0 | 0 | 0 | 0 | 0 | 3 |
| <u>SCG5</u>      | 1 | 0 | 0 | 1 | 0 | 0 | 0 | 0 | 0 | 1 | 3 |
| <u>CSMD1</u>     | 0 | 1 | 0 | 1 | 0 | 0 | 0 | 0 | 0 | 1 | 3 |
| <u>CXorf30</u>   | 0 | 1 | 0 | 1 | 0 | 0 | 0 | 0 | 0 | 1 | 3 |
| <u>SH3BP2</u>    | 1 | 0 | 0 | 1 | 0 | 0 | 0 | 0 | 0 | 1 | 3 |
| <u>SH3BP2</u>    | 1 | 0 | 0 | 1 | 0 | 0 | 0 | 0 | 0 | 1 | 3 |
| <u>ITSN1</u>     | 1 | 0 | 0 | 1 | 0 | 0 | 0 | 0 | 0 | 1 | 3 |
| <u>CTAGE1</u>    | 0 | 1 | 0 | 1 | 0 | 0 | 0 | 0 | 0 | 1 | 3 |
| <u>ATPAF1</u>    | 1 | 0 | 0 | 1 | 0 | 0 | 0 | 0 | 0 | 1 | 3 |

|                |   |   |   |   |   |   |   |   |   |   |   |
|----------------|---|---|---|---|---|---|---|---|---|---|---|
| <u>TBC1D15</u> | 0 | 1 | 0 | 1 | 0 | 0 | 0 | 0 | 0 | 1 | 3 |
| <u>RABL5</u>   | 1 | 0 | 0 | 1 | 0 | 0 | 0 | 0 | 0 | 1 | 3 |
| <u>RABL5</u>   | 1 | 0 | 0 | 1 | 0 | 0 | 0 | 0 | 0 | 1 | 3 |
| <u>ARV1</u>    | 1 | 1 | 0 | 1 | 0 | 0 | 0 | 0 | 0 | 0 | 3 |
| <u>IL25</u>    | 1 | 0 | 0 | 1 | 0 | 0 | 0 | 0 | 0 | 1 | 3 |
| <u>ST3GAL1</u> | 1 | 0 | 0 | 1 | 0 | 0 | 0 | 0 | 0 | 1 | 3 |
| <u>SLC13A3</u> | 1 | 0 | 0 | 1 | 0 | 0 | 0 | 0 | 0 | 1 | 3 |
| <u>USP46</u>   | 1 | 0 | 0 | 1 | 0 | 0 | 0 | 0 | 0 | 1 | 3 |
| <u>PCDH20</u>  | 1 | 1 | 0 | 1 | 0 | 0 | 0 | 0 | 0 | 0 | 3 |
| <u>ST8SIA1</u> | 0 | 1 | 0 | 1 | 0 | 0 | 0 | 0 | 0 | 1 | 3 |
| <u>TTC23</u>   | 1 | 0 | 0 | 1 | 0 | 0 | 0 | 0 | 0 | 1 | 3 |
| <u>TTC23</u>   | 1 | 0 | 0 | 1 | 0 | 0 | 0 | 0 | 0 | 1 | 3 |
| <u>TTC23</u>   | 1 | 0 | 0 | 1 | 0 | 0 | 0 | 0 | 0 | 1 | 3 |
| <u>TTC23</u>   | 1 | 0 | 0 | 1 | 0 | 0 | 0 | 0 | 0 | 1 | 3 |
| <u>TTC23</u>   | 1 | 0 | 0 | 1 | 0 | 0 | 0 | 0 | 0 | 1 | 3 |
| <u>MRPS9</u>   | 1 | 1 | 0 | 1 | 0 | 0 | 0 | 0 | 0 | 0 | 3 |
| <u>BMP2</u>    | 1 | 1 | 0 | 1 | 0 | 0 | 0 | 0 | 0 | 0 | 3 |
| <u>SKP1</u>    | 0 | 1 | 0 | 1 | 0 | 0 | 0 | 0 | 0 | 1 | 3 |
| <u>SKP1</u>    | 0 | 1 | 0 | 1 | 0 | 0 | 0 | 0 | 0 | 1 | 3 |
| <u>NDRG4</u>   | 1 | 0 | 0 | 1 | 0 | 0 | 0 | 0 | 0 | 1 | 3 |
| <u>NDRG4</u>   | 1 | 0 | 0 | 1 | 0 | 0 | 0 | 0 | 0 | 1 | 3 |
| <u>SLA</u>     | 1 | 0 | 0 | 1 | 0 | 0 | 0 | 0 | 0 | 1 | 3 |
| <u>SLA</u>     | 1 | 0 | 0 | 1 | 0 | 0 | 0 | 0 | 0 | 1 | 3 |
| <u>GPBP1</u>   | 1 | 0 | 0 | 1 | 0 | 0 | 0 | 0 | 0 | 1 | 3 |
| <u>ALS2CR4</u> | 1 | 0 | 0 | 1 | 0 | 0 | 0 | 0 | 0 | 1 | 3 |
| <u>BMP3</u>    | 0 | 1 | 0 | 1 | 0 | 0 | 0 | 0 | 0 | 1 | 3 |
| <u>SLC2A1</u>  | 0 | 1 | 0 | 1 | 0 | 0 | 0 | 0 | 0 | 1 | 3 |
| <u>SLC7A2</u>  | 1 | 0 | 0 | 1 | 0 | 0 | 0 | 0 | 0 | 1 | 3 |
| <u>SLC16A2</u> | 1 | 1 | 0 | 1 | 0 | 0 | 0 | 0 | 0 | 0 | 3 |
| <u>SLIT1</u>   | 1 | 1 | 0 | 1 | 0 | 0 | 0 | 0 | 0 | 0 | 3 |
| <u>PHACTR4</u> | 1 | 0 | 0 | 1 | 0 | 0 | 0 | 0 | 0 | 1 | 3 |
| <u>CAPRIN2</u> | 1 | 0 | 0 | 1 | 0 | 0 | 0 | 0 | 0 | 1 | 3 |
| <u>KCTD14</u>  | 1 | 1 | 0 | 1 | 0 | 0 | 0 | 0 | 0 | 0 | 3 |
| <u>SMARCC2</u> | 1 | 1 | 0 | 1 | 0 | 0 | 0 | 0 | 0 | 0 | 3 |
| <u>BOLL</u>    | 1 | 0 | 0 | 1 | 0 | 0 | 0 | 0 | 0 | 1 | 3 |
| <u>SNAP25</u>  | 1 | 0 | 0 | 1 | 0 | 0 | 0 | 0 | 0 | 1 | 3 |
| <u>SNTB1</u>   | 0 | 1 | 0 | 1 | 0 | 0 | 0 | 0 | 0 | 1 | 3 |
| <u>SNX1</u>    | 1 | 0 | 0 | 1 | 0 | 0 | 0 | 0 | 0 | 1 | 3 |
| <u>SNX1</u>    | 1 | 0 | 0 | 1 | 0 | 0 | 0 | 0 | 0 | 1 | 3 |
| <u>SOD3</u>    | 1 | 1 | 0 | 1 | 0 | 0 | 0 | 0 | 0 | 0 | 3 |
| <u>BOK</u>     | 1 | 1 | 0 | 1 | 0 | 0 | 0 | 0 | 0 | 0 | 3 |

|                |   |   |   |   |   |   |   |   |   |   |   |
|----------------|---|---|---|---|---|---|---|---|---|---|---|
| <u>SOX9</u>    | 1 | 1 | 0 | 1 | 0 | 0 | 0 | 0 | 0 | 0 | 3 |
| <u>SP3</u>     | 1 | 1 | 0 | 1 | 0 | 0 | 0 | 0 | 0 | 0 | 3 |
| <u>SP100</u>   | 1 | 1 | 0 | 1 | 0 | 0 | 0 | 0 | 0 | 0 | 3 |
| <u>SPAG1</u>   | 1 | 0 | 0 | 1 | 0 | 0 | 0 | 0 | 0 | 1 | 3 |
| <u>SPP1</u>    | 1 | 0 | 0 | 1 | 0 | 0 | 0 | 0 | 0 | 1 | 3 |
| <u>SPP1</u>    | 1 | 0 | 0 | 1 | 0 | 0 | 0 | 0 | 0 | 1 | 3 |
| <u>SRI</u>     | 0 | 1 | 0 | 1 | 0 | 0 | 0 | 0 | 0 | 1 | 3 |
| <u>SREBF2</u>  | 1 | 1 | 0 | 1 | 0 | 0 | 0 | 0 | 0 | 0 | 3 |
| <u>SRPK2</u>   | 1 | 0 | 0 | 1 | 0 | 0 | 0 | 0 | 0 | 1 | 3 |
| <u>SSB</u>     | 1 | 1 | 0 | 1 | 0 | 0 | 0 | 0 | 0 | 0 | 3 |
| <u>SSR1</u>    | 0 | 1 | 0 | 1 | 0 | 0 | 0 | 0 | 0 | 1 | 3 |
| <u>STAT3</u>   | 1 | 0 | 0 | 1 | 0 | 0 | 0 | 0 | 0 | 1 | 3 |
| <u>STAT3</u>   | 0 | 1 | 0 | 1 | 0 | 0 | 0 | 0 | 0 | 1 | 3 |
| <u>STYX</u>    | 1 | 1 | 0 | 1 | 0 | 0 | 0 | 0 | 0 | 0 | 3 |
| <u>SULT1C2</u> | 1 | 0 | 0 | 1 | 0 | 0 | 0 | 0 | 0 | 1 | 3 |
| <u>VAMP1</u>   | 1 | 1 | 0 | 1 | 0 | 0 | 0 | 0 | 0 | 0 | 3 |
| <u>SYN2</u>    | 0 | 1 | 0 | 1 | 0 | 0 | 0 | 0 | 0 | 1 | 3 |
| <u>CNTN2</u>   | 1 | 1 | 0 | 1 | 0 | 0 | 0 | 0 | 0 | 0 | 3 |
| <u>TBXA2R</u>  | 1 | 1 | 0 | 1 | 0 | 0 | 0 | 0 | 0 | 0 | 3 |
| <u>TCF4</u>    | 0 | 1 | 0 | 1 | 0 | 0 | 0 | 0 | 0 | 1 | 3 |
| <u>C2orf3</u>  | 1 | 0 | 0 | 1 | 0 | 0 | 0 | 0 | 0 | 1 | 3 |
| <u>TFDP1</u>   | 1 | 1 | 0 | 1 | 0 | 0 | 0 | 0 | 0 | 0 | 3 |
| <u>TFRC</u>    | 1 | 0 | 0 | 1 | 0 | 0 | 0 | 0 | 0 | 1 | 3 |
| <u>TGFA</u>    | 0 | 1 | 0 | 1 | 0 | 0 | 0 | 0 | 0 | 1 | 3 |
| <u>TGFBR1</u>  | 1 | 0 | 0 | 1 | 0 | 0 | 0 | 0 | 0 | 1 | 3 |
| <u>TGFBR2</u>  | 1 | 0 | 0 | 1 | 0 | 0 | 0 | 0 | 0 | 1 | 3 |
| <u>TGFBR3</u>  | 1 | 1 | 0 | 1 | 0 | 0 | 0 | 0 | 0 | 0 | 3 |
| <u>THRB</u>    | 1 | 0 | 0 | 1 | 0 | 0 | 0 | 0 | 0 | 1 | 3 |
| <u>THRB</u>    | 1 | 0 | 0 | 1 | 0 | 0 | 0 | 0 | 0 | 1 | 3 |
| <u>TIAL1</u>   | 1 | 0 | 0 | 1 | 0 | 0 | 0 | 0 | 0 | 1 | 3 |
| <u>TSPAN7</u>  | 1 | 1 | 0 | 1 | 0 | 0 | 0 | 0 | 0 | 0 | 3 |
| <u>GPR137B</u> | 1 | 1 | 0 | 1 | 0 | 0 | 0 | 0 | 0 | 0 | 3 |
| <u>TMPRSS2</u> | 1 | 0 | 0 | 1 | 0 | 0 | 0 | 0 | 0 | 1 | 3 |
| <u>TNF</u>     | 0 | 1 | 0 | 1 | 0 | 0 | 0 | 0 | 0 | 1 | 3 |
| <u>TNS1</u>    | 0 | 1 | 0 | 1 | 0 | 0 | 0 | 0 | 0 | 1 | 3 |
| <u>TPD52</u>   | 1 | 0 | 0 | 1 | 0 | 0 | 0 | 0 | 0 | 1 | 3 |
| <u>TPD52L2</u> | 1 | 1 | 0 | 1 | 0 | 0 | 0 | 0 | 0 | 0 | 3 |
| <u>TRPS1</u>   | 1 | 1 | 0 | 1 | 0 | 0 | 0 | 0 | 0 | 0 | 3 |
| <u>TSC1</u>    | 1 | 1 | 0 | 1 | 0 | 0 | 0 | 0 | 0 | 0 | 3 |
| <u>TUB</u>     | 1 | 0 | 0 | 1 | 0 | 0 | 0 | 0 | 0 | 1 | 3 |
| <u>C5AR1</u>   | 1 | 1 | 0 | 1 | 0 | 0 | 0 | 0 | 0 | 0 | 3 |

|           |   |   |   |   |   |   |   |   |   |   |   |
|-----------|---|---|---|---|---|---|---|---|---|---|---|
| TUFM      | 0 | 1 | 0 | 1 | 0 | 0 | 0 | 0 | 0 | 1 | 3 |
| FLJ78302  | 1 | 1 | 0 | 1 | 0 | 0 | 0 | 0 | 0 | 0 | 3 |
| C6orf35   | 0 | 1 | 0 | 1 | 0 | 0 | 0 | 0 | 0 | 1 | 3 |
| TXNRD1    | 1 | 1 | 0 | 1 | 0 | 0 | 0 | 0 | 0 | 0 | 3 |
| LOC729830 | 0 | 1 | 0 | 1 | 0 | 0 | 0 | 0 | 0 | 1 | 3 |
| UBE2A     | 1 | 0 | 0 | 1 | 0 | 0 | 0 | 0 | 0 | 1 | 3 |
| UBE2A     | 1 | 0 | 0 | 1 | 0 | 0 | 0 | 0 | 0 | 1 | 3 |
| UBE2G1    | 1 | 1 | 0 | 1 | 0 | 0 | 0 | 0 | 0 | 0 | 3 |
| UBE3A     | 1 | 1 | 0 | 1 | 0 | 0 | 0 | 0 | 0 | 0 | 3 |
| UBP1      | 1 | 0 | 0 | 1 | 0 | 0 | 0 | 0 | 0 | 1 | 3 |
| VCAM1     | 1 | 0 | 0 | 1 | 0 | 0 | 0 | 0 | 0 | 1 | 3 |
| VEGFA     | 1 | 1 | 0 | 1 | 0 | 0 | 0 | 0 | 0 | 0 | 3 |
| VEGFA     | 1 | 1 | 0 | 1 | 0 | 0 | 0 | 0 | 0 | 0 | 3 |
| VEGFA     | 1 | 1 | 0 | 1 | 0 | 0 | 0 | 0 | 0 | 0 | 3 |
| VIP       | 1 | 0 | 0 | 1 | 0 | 0 | 0 | 0 | 0 | 1 | 3 |
| TRPV1     | 1 | 1 | 0 | 1 | 0 | 0 | 0 | 0 | 0 | 0 | 3 |
| WHSC1     | 1 | 0 | 0 | 1 | 0 | 0 | 0 | 0 | 0 | 1 | 3 |
| WHSC1     | 1 | 0 | 0 | 1 | 0 | 0 | 0 | 0 | 0 | 1 | 3 |
| WHSC1     | 1 | 0 | 0 | 1 | 0 | 0 | 0 | 0 | 0 | 1 | 3 |
| XG        | 1 | 0 | 0 | 1 | 0 | 0 | 0 | 0 | 0 | 1 | 3 |
| YWHAB     | 1 | 0 | 0 | 1 | 0 | 0 | 0 | 0 | 0 | 1 | 3 |
| C18orf1   | 1 | 0 | 0 | 1 | 0 | 0 | 0 | 0 | 0 | 1 | 3 |
| C18orf1   | 1 | 0 | 0 | 1 | 0 | 0 | 0 | 0 | 0 | 1 | 3 |
| C18orf1   | 1 | 0 | 0 | 1 | 0 | 0 | 0 | 0 | 0 | 1 | 3 |
| C18orf1   | 1 | 0 | 0 | 1 | 0 | 0 | 0 | 0 | 0 | 1 | 3 |
| C18orf1   | 1 | 0 | 0 | 1 | 0 | 0 | 0 | 0 | 0 | 1 | 3 |
| SF1       | 1 | 0 | 0 | 1 | 0 | 0 | 0 | 0 | 0 | 1 | 3 |
| ZFY       | 1 | 1 | 0 | 1 | 0 | 0 | 0 | 0 | 0 | 0 | 3 |
| ZSCAN20   | 1 | 1 | 0 | 1 | 0 | 0 | 0 | 0 | 0 | 0 | 3 |
| ZNF35     | 1 | 1 | 0 | 1 | 0 | 0 | 0 | 0 | 0 | 0 | 3 |
| ZNF37A    | 1 | 0 | 0 | 1 | 0 | 0 | 0 | 0 | 0 | 1 | 3 |
| ZNF84     | 1 | 0 | 0 | 1 | 0 | 0 | 0 | 0 | 0 | 1 | 3 |
| PSAPL1    | 1 | 1 | 0 | 1 | 0 | 0 | 0 | 0 | 0 | 0 | 3 |
| ZNF133    | 1 | 1 | 0 | 1 | 0 | 0 | 0 | 0 | 0 | 0 | 3 |
| ZNF148    | 0 | 1 | 0 | 1 | 0 | 0 | 0 | 0 | 0 | 1 | 3 |
| ZNF154    | 0 | 1 | 0 | 1 | 0 | 0 | 0 | 0 | 0 | 1 | 3 |
| VEZF1     | 1 | 1 | 0 | 1 | 0 | 0 | 0 | 0 | 0 | 0 | 3 |
| ZNF200    | 1 | 0 | 0 | 1 | 0 | 0 | 0 | 0 | 0 | 1 | 3 |
| ZNF200    | 1 | 0 | 0 | 1 | 0 | 0 | 0 | 0 | 0 | 1 | 3 |
| ZNF207    | 1 | 0 | 0 | 1 | 0 | 0 | 0 | 0 | 0 | 1 | 3 |
| ZNF208    | 1 | 1 | 0 | 1 | 0 | 0 | 0 | 0 | 0 | 0 | 3 |

|           |   |   |   |   |   |   |   |   |   |   |   |
|-----------|---|---|---|---|---|---|---|---|---|---|---|
| ZFAND5    | 1 | 0 | 0 | 1 | 0 | 0 | 0 | 0 | 0 | 1 | 3 |
| LRP8      | 1 | 0 | 0 | 1 | 0 | 0 | 0 | 0 | 0 | 1 | 3 |
| LRP8      | 1 | 0 | 0 | 1 | 0 | 0 | 0 | 0 | 0 | 1 | 3 |
| LRP8      | 1 | 0 | 0 | 1 | 0 | 0 | 0 | 0 | 0 | 1 | 3 |
| FAM18A    | 0 | 1 | 0 | 1 | 0 | 0 | 0 | 0 | 0 | 1 | 3 |
| CACNB2    | 0 | 0 | 0 | 1 | 1 | 0 | 0 | 0 | 0 | 1 | 3 |
| SEMA3B    | 0 | 1 | 0 | 1 | 0 | 0 | 0 | 0 | 0 | 1 | 3 |
| ZNF655    | 1 | 0 | 0 | 1 | 0 | 0 | 0 | 0 | 0 | 1 | 3 |
| ZNF655    | 1 | 0 | 0 | 1 | 0 | 0 | 0 | 0 | 0 | 1 | 3 |
| CARD14    | 1 | 1 | 0 | 1 | 0 | 0 | 0 | 0 | 0 | 0 | 3 |
| C20orf121 | 1 | 0 | 0 | 1 | 0 | 0 | 0 | 0 | 0 | 1 | 3 |
| ZNF557    | 1 | 0 | 0 | 1 | 0 | 0 | 0 | 0 | 0 | 1 | 3 |
| ZNF557    | 1 | 0 | 0 | 1 | 0 | 0 | 0 | 0 | 0 | 1 | 3 |
| ZXDC      | 1 | 1 | 0 | 1 | 0 | 0 | 0 | 0 | 0 | 0 | 3 |
| FCRL2     | 1 | 1 | 0 | 1 | 0 | 0 | 0 | 0 | 0 | 0 | 3 |
| C4orf15   | 1 | 1 | 0 | 1 | 0 | 0 | 0 | 0 | 0 | 0 | 3 |
| LRRC2     | 1 | 1 | 0 | 1 | 0 | 0 | 0 | 0 | 0 | 0 | 3 |
| EPM2A     | 1 | 1 | 0 | 1 | 0 | 0 | 0 | 0 | 0 | 0 | 3 |
| EPM2A     | 1 | 1 | 0 | 1 | 0 | 0 | 0 | 0 | 0 | 0 | 3 |
| ATP13A3   | 1 | 1 | 0 | 1 | 0 | 0 | 0 | 0 | 0 | 0 | 3 |
| RNF128    | 1 | 0 | 0 | 1 | 0 | 0 | 0 | 0 | 0 | 1 | 3 |
| CALCA     | 0 | 1 | 0 | 1 | 0 | 0 | 0 | 0 | 0 | 1 | 3 |
| FAM118B   | 1 | 1 | 0 | 1 | 0 | 0 | 0 | 0 | 0 | 0 | 3 |
| C1orf108  | 1 | 1 | 0 | 1 | 0 | 0 | 0 | 0 | 0 | 0 | 3 |
| DYNC2H1   | 0 | 1 | 0 | 1 | 0 | 0 | 0 | 0 | 0 | 1 | 3 |
| PPP1R3B   | 0 | 1 | 0 | 1 | 0 | 0 | 0 | 0 | 0 | 1 | 3 |
| NARG2     | 1 | 0 | 0 | 1 | 0 | 0 | 0 | 0 | 0 | 1 | 3 |
| ZNF329    | 0 | 1 | 0 | 1 | 0 | 0 | 0 | 0 | 0 | 1 | 3 |
| FASTKD1   | 0 | 1 | 0 | 1 | 0 | 0 | 0 | 0 | 0 | 1 | 3 |
| PPCS      | 1 | 0 | 0 | 1 | 0 | 0 | 0 | 0 | 0 | 1 | 3 |
| TBL1XR1   | 0 | 1 | 0 | 1 | 0 | 0 | 0 | 0 | 0 | 1 | 3 |
| C1orf113  | 1 | 0 | 0 | 1 | 0 | 0 | 0 | 0 | 0 | 1 | 3 |
| ZNF419    | 1 | 0 | 0 | 1 | 0 | 0 | 0 | 0 | 0 | 1 | 3 |
| ZNF419    | 1 | 0 | 0 | 1 | 0 | 0 | 0 | 0 | 0 | 1 | 3 |
| ZNF419    | 1 | 0 | 0 | 1 | 0 | 0 | 0 | 0 | 0 | 1 | 3 |
| ZNF419    | 1 | 0 | 0 | 1 | 0 | 0 | 0 | 0 | 0 | 1 | 3 |
| ZNF419    | 1 | 0 | 0 | 1 | 0 | 0 | 0 | 0 | 0 | 1 | 3 |
| ZFHX4     | 0 | 1 | 0 | 1 | 0 | 0 | 0 | 0 | 0 | 1 | 3 |
| ALG9      | 1 | 0 | 0 | 1 | 0 | 0 | 0 | 0 | 0 | 1 | 3 |
| ALG9      | 1 | 0 | 0 | 1 | 0 | 0 | 0 | 0 | 0 | 1 | 3 |
| ALS2CR8   | 1 | 0 | 0 | 1 | 0 | 0 | 0 | 0 | 0 | 1 | 3 |

|                  |   |   |   |   |   |   |   |   |   |   |   |
|------------------|---|---|---|---|---|---|---|---|---|---|---|
| <u>GSTCD</u>     | 1 | 0 | 0 | 1 | 0 | 0 | 0 | 0 | 0 | 1 | 3 |
| <u>METTL8</u>    | 0 | 1 | 0 | 1 | 0 | 0 | 0 | 0 | 0 | 1 | 3 |
| <u>NAT11</u>     | 1 | 1 | 0 | 1 | 0 | 0 | 0 | 0 | 0 | 0 | 3 |
| <u>FAM124B</u>   | 1 | 1 | 0 | 1 | 0 | 0 | 0 | 0 | 0 | 0 | 3 |
| <u>C2orf54</u>   | 1 | 0 | 0 | 1 | 0 | 0 | 0 | 0 | 0 | 1 | 3 |
| <u>KIAA0319L</u> | 1 | 1 | 0 | 1 | 0 | 0 | 0 | 0 | 0 | 0 | 3 |
| <u>SYNPO2L</u>   | 1 | 1 | 0 | 1 | 0 | 0 | 0 | 0 | 0 | 0 | 3 |
| <u>MYST3</u>     | 1 | 1 | 0 | 1 | 0 | 0 | 0 | 0 | 0 | 0 | 3 |
| <u>SCD5</u>      | 1 | 1 | 0 | 1 | 0 | 0 | 0 | 0 | 0 | 0 | 3 |
| <u>C10orf88</u>  | 0 | 1 | 0 | 1 | 0 | 0 | 0 | 0 | 0 | 1 | 3 |
| <u>WWC2</u>      | 0 | 1 | 0 | 1 | 0 | 0 | 0 | 0 | 0 | 1 | 3 |
| <u>PANK2</u>     | 1 | 0 | 0 | 1 | 0 | 0 | 0 | 0 | 0 | 1 | 3 |
| <u>PANK2</u>     | 1 | 0 | 0 | 1 | 0 | 0 | 0 | 0 | 0 | 1 | 3 |
| <u>SEMA6D</u>    | 0 | 1 | 0 | 1 | 0 | 0 | 0 | 0 | 0 | 1 | 3 |
| <u>TRPM3</u>     | 1 | 0 | 0 | 1 | 0 | 0 | 0 | 0 | 0 | 1 | 3 |
| <u>TRPM3</u>     | 1 | 0 | 0 | 1 | 0 | 0 | 0 | 0 | 0 | 1 | 3 |
| <u>TRPM3</u>     | 1 | 0 | 0 | 1 | 0 | 0 | 0 | 0 | 0 | 1 | 3 |
| <u>ZFP2</u>      | 0 | 1 | 0 | 1 | 0 | 0 | 0 | 0 | 0 | 1 | 3 |
| <u>ASRGL1</u>    | 1 | 0 | 0 | 1 | 0 | 0 | 0 | 0 | 0 | 1 | 3 |
| <u>IFT74</u>     | 1 | 1 | 0 | 1 | 0 | 0 | 0 | 0 | 0 | 0 | 3 |
| <u>OPA3</u>      | 0 | 1 | 0 | 1 | 0 | 0 | 0 | 0 | 0 | 1 | 3 |
| <u>TM2D3</u>     | 1 | 1 | 0 | 1 | 0 | 0 | 0 | 0 | 0 | 0 | 3 |
| <u>LHX3</u>      | 1 | 0 | 0 | 1 | 0 | 0 | 0 | 0 | 0 | 1 | 3 |
| <u>RAB11FIP1</u> | 1 | 1 | 0 | 1 | 0 | 0 | 0 | 0 | 0 | 0 | 3 |
| <u>MLLT10</u>    | 0 | 1 | 0 | 1 | 0 | 0 | 0 | 0 | 0 | 1 | 3 |
| <u>MLLT10</u>    | 1 | 0 | 0 | 1 | 0 | 0 | 0 | 0 | 0 | 1 | 3 |
| <u>CUBN</u>      | 0 | 1 | 0 | 1 | 0 | 0 | 0 | 0 | 0 | 1 | 3 |
| <u>ZKSCAN3</u>   | 0 | 1 | 0 | 1 | 0 | 0 | 0 | 0 | 0 | 1 | 3 |
| <u>WDR23</u>     | 1 | 0 | 0 | 1 | 0 | 0 | 0 | 0 | 0 | 1 | 3 |
| <u>WDR23</u>     | 1 | 0 | 0 | 1 | 0 | 0 | 0 | 0 | 0 | 1 | 3 |
| <u>COASY</u>     | 1 | 0 | 0 | 1 | 0 | 0 | 0 | 0 | 0 | 1 | 3 |
| <u>COASY</u>     | 1 | 0 | 0 | 1 | 0 | 0 | 0 | 0 | 0 | 1 | 3 |
| <u>COASY</u>     | 1 | 0 | 0 | 1 | 0 | 0 | 0 | 0 | 0 | 1 | 3 |
| <u>COASY</u>     | 1 | 0 | 0 | 1 | 0 | 0 | 0 | 0 | 0 | 1 | 3 |
| <u>ADAM12</u>    | 1 | 1 | 0 | 1 | 0 | 0 | 0 | 0 | 0 | 0 | 3 |
| <u>TMEM22</u>    | 1 | 0 | 0 | 1 | 0 | 0 | 0 | 0 | 0 | 1 | 3 |
| <u>TMEM22</u>    | 1 | 0 | 0 | 1 | 0 | 0 | 0 | 0 | 0 | 1 | 3 |
| <u>KHDC1</u>     | 0 | 1 | 0 | 1 | 0 | 0 | 0 | 0 | 0 | 1 | 3 |
| <u>ITIH5</u>     | 1 | 0 | 0 | 1 | 0 | 0 | 0 | 0 | 0 | 1 | 3 |
| <u>CALM3</u>     | 1 | 1 | 0 | 1 | 0 | 0 | 0 | 0 | 0 | 0 | 3 |
| <u>ZNF436</u>    | 1 | 0 | 0 | 1 | 0 | 0 | 0 | 0 | 0 | 1 | 3 |



|          |   |   |   |   |   |   |   |   |   |   |   |
|----------|---|---|---|---|---|---|---|---|---|---|---|
| ZFP91    | 1 | 1 | 0 | 1 | 0 | 0 | 0 | 0 | 0 | 0 | 3 |
| APOL6    | 0 | 1 | 0 | 1 | 0 | 0 | 0 | 0 | 0 | 1 | 3 |
| HMGA2    | 0 | 1 | 0 | 1 | 0 | 0 | 0 | 0 | 0 | 1 | 3 |
| WNT5B    | 1 | 0 | 0 | 1 | 0 | 0 | 0 | 0 | 0 | 1 | 3 |
| ANP32A   | 1 | 1 | 0 | 1 | 0 | 0 | 0 | 0 | 0 | 0 | 3 |
| ST8SIA2  | 1 | 1 | 0 | 1 | 0 | 0 | 0 | 0 | 0 | 0 | 3 |
| CALU     | 1 | 0 | 0 | 1 | 0 | 0 | 0 | 0 | 0 | 1 | 3 |
| TAF15    | 0 | 1 | 0 | 1 | 0 | 0 | 0 | 0 | 0 | 1 | 3 |
| HM13     | 0 | 1 | 0 | 1 | 0 | 0 | 0 | 0 | 0 | 1 | 3 |
| SLC38A1  | 1 | 0 | 0 | 1 | 0 | 0 | 0 | 0 | 0 | 1 | 3 |
| TSPAN14  | 1 | 1 | 0 | 1 | 0 | 0 | 0 | 0 | 0 | 0 | 3 |
| CCNL2    | 0 | 1 | 0 | 1 | 0 | 0 | 0 | 0 | 0 | 1 | 3 |
| RNF146   | 1 | 1 | 0 | 1 | 0 | 0 | 0 | 0 | 0 | 0 | 3 |
| CABLES2  | 1 | 1 | 0 | 1 | 0 | 0 | 0 | 0 | 0 | 0 | 3 |
| NCOA3    | 1 | 0 | 0 | 1 | 0 | 0 | 0 | 0 | 0 | 1 | 3 |
| NRIP1    | 1 | 1 | 0 | 1 | 0 | 0 | 0 | 0 | 0 | 0 | 3 |
| HDHD1A   | 1 | 0 | 0 | 1 | 0 | 0 | 0 | 0 | 0 | 1 | 3 |
| USP9X    | 1 | 0 | 0 | 1 | 0 | 0 | 0 | 0 | 0 | 1 | 3 |
| JARID1C  | 1 | 1 | 0 | 1 | 0 | 0 | 0 | 0 | 0 | 0 | 3 |
| COLQ     | 1 | 1 | 0 | 1 | 0 | 0 | 0 | 0 | 0 | 0 | 3 |
| PICALM   | 1 | 0 | 0 | 1 | 0 | 0 | 0 | 0 | 0 | 1 | 3 |
| ACOX3    | 0 | 1 | 0 | 1 | 0 | 0 | 0 | 0 | 0 | 1 | 3 |
| BRAP     | 1 | 1 | 0 | 1 | 0 | 0 | 0 | 0 | 0 | 0 | 3 |
| CASP1    | 0 | 1 | 0 | 1 | 0 | 0 | 0 | 0 | 0 | 1 | 3 |
| LRRC48   | 0 | 1 | 0 | 1 | 0 | 0 | 0 | 0 | 0 | 1 | 3 |
| HIST1H3D | 0 | 1 | 0 | 1 | 0 | 0 | 0 | 0 | 0 | 1 | 3 |
| DNAL1    | 0 | 1 | 0 | 1 | 0 | 0 | 0 | 0 | 0 | 1 | 3 |
| C19orf12 | 1 | 0 | 0 | 1 | 0 | 0 | 0 | 0 | 0 | 1 | 3 |
| DYNLRB1  | 1 | 1 | 0 | 1 | 0 | 0 | 0 | 0 | 0 | 0 | 3 |
| CD99L2   | 1 | 1 | 0 | 1 | 0 | 0 | 0 | 0 | 0 | 0 | 3 |
| FCAMR    | 1 | 1 | 0 | 1 | 0 | 0 | 0 | 0 | 0 | 0 | 3 |
| NCALD    | 1 | 0 | 0 | 1 | 0 | 0 | 0 | 0 | 0 | 1 | 3 |
| NCALD    | 1 | 0 | 0 | 1 | 0 | 0 | 0 | 0 | 0 | 1 | 3 |
| TMPRSS13 | 1 | 1 | 0 | 1 | 0 | 0 | 0 | 0 | 0 | 0 | 3 |
| KATNAL1  | 1 | 0 | 0 | 1 | 0 | 0 | 0 | 0 | 0 | 1 | 3 |
| MAGT1    | 1 | 1 | 0 | 1 | 0 | 0 | 0 | 0 | 0 | 0 | 3 |
| C11orf56 | 1 | 0 | 0 | 1 | 0 | 0 | 0 | 0 | 0 | 1 | 3 |
| CASP8    | 1 | 1 | 0 | 1 | 0 | 0 | 0 | 0 | 0 | 0 | 3 |
| CASP8    | 1 | 1 | 0 | 1 | 0 | 0 | 0 | 0 | 0 | 0 | 3 |
| ARL6     | 1 | 1 | 0 | 1 | 0 | 0 | 0 | 0 | 0 | 0 | 3 |
| STX7     | 1 | 1 | 0 | 1 | 0 | 0 | 0 | 0 | 0 | 0 | 3 |

|                 |   |   |   |   |   |   |   |   |   |   |   |
|-----------------|---|---|---|---|---|---|---|---|---|---|---|
| <u>RHBDD1</u>   | 1 | 1 | 0 | 1 | 0 | 0 | 0 | 0 | 0 | 0 | 3 |
| <u>CAMKK1</u>   | 1 | 0 | 0 | 1 | 0 | 0 | 0 | 0 | 0 | 1 | 3 |
| <u>STK24</u>    | 1 | 0 | 0 | 1 | 0 | 0 | 0 | 0 | 0 | 1 | 3 |
| <u>MGC13057</u> | 1 | 0 | 0 | 1 | 0 | 0 | 0 | 0 | 0 | 1 | 3 |
| <u>BRMS1L</u>   | 1 | 1 | 0 | 1 | 0 | 0 | 0 | 0 | 0 | 0 | 3 |
| <u>NCK2</u>     | 1 | 1 | 0 | 1 | 0 | 0 | 0 | 0 | 0 | 0 | 3 |
| <u>NCK2</u>     | 1 | 1 | 0 | 1 | 0 | 0 | 0 | 0 | 0 | 0 | 3 |
| <u>C15orf48</u> | 1 | 0 | 0 | 1 | 0 | 0 | 0 | 0 | 0 | 1 | 3 |
| <u>GPR123</u>   | 1 | 0 | 0 | 1 | 0 | 0 | 0 | 0 | 0 | 1 | 3 |
| <u>ZNF333</u>   | 1 | 1 | 0 | 1 | 0 | 0 | 0 | 0 | 0 | 0 | 3 |
| <u>DYRK2</u>    | 0 | 1 | 0 | 1 | 0 | 0 | 0 | 0 | 0 | 1 | 3 |
| <u>ZNF512</u>   | 0 | 1 | 0 | 1 | 0 | 0 | 0 | 0 | 0 | 1 | 3 |
| <u>L3MBTL3</u>  | 1 | 1 | 0 | 1 | 0 | 0 | 0 | 0 | 0 | 0 | 3 |
| <u>CUL4B</u>    | 1 | 1 | 0 | 1 | 0 | 0 | 0 | 0 | 0 | 0 | 3 |
| <u>JPH4</u>     | 1 | 0 | 0 | 1 | 0 | 0 | 0 | 0 | 0 | 1 | 3 |
| <u>ZNF527</u>   | 0 | 1 | 0 | 1 | 0 | 0 | 0 | 0 | 0 | 1 | 3 |
| <u>PGBD1</u>    | 1 | 1 | 0 | 1 | 0 | 0 | 0 | 0 | 0 | 0 | 3 |
| <u>PARD6B</u>   | 0 | 1 | 0 | 1 | 0 | 0 | 0 | 0 | 0 | 1 | 3 |
| <u>GPR174</u>   | 0 | 1 | 0 | 1 | 0 | 0 | 0 | 0 | 0 | 1 | 3 |
| <u>N-PAC</u>    | 1 | 1 | 0 | 1 | 0 | 0 | 0 | 0 | 0 | 0 | 3 |
| <u>SORBS2</u>   | 1 | 0 | 0 | 1 | 0 | 0 | 0 | 0 | 0 | 1 | 3 |
| <u>SORBS2</u>   | 1 | 0 | 0 | 1 | 0 | 0 | 0 | 0 | 0 | 1 | 3 |
| <u>GTPBP3</u>   | 1 | 0 | 0 | 1 | 0 | 0 | 0 | 0 | 0 | 1 | 3 |
| <u>GPT2</u>     | 1 | 1 | 0 | 1 | 0 | 0 | 0 | 0 | 0 | 0 | 3 |
| <u>PSRC1</u>    | 1 | 0 | 0 | 1 | 0 | 0 | 0 | 0 | 0 | 1 | 3 |
| <u>MINA</u>     | 1 | 0 | 0 | 1 | 0 | 0 | 0 | 0 | 0 | 1 | 3 |
| <u>MINA</u>     | 1 | 0 | 0 | 1 | 0 | 0 | 0 | 0 | 0 | 1 | 3 |
| <u>PTPN5</u>    | 1 | 1 | 0 | 1 | 0 | 0 | 0 | 0 | 0 | 0 | 3 |
| <u>HAVCR2</u>   | 1 | 1 | 0 | 1 | 0 | 0 | 0 | 0 | 0 | 0 | 3 |
| <u>TBRG1</u>    | 0 | 1 | 0 | 1 | 0 | 0 | 0 | 0 | 0 | 1 | 3 |
| <u>ZNF566</u>   | 1 | 0 | 0 | 1 | 0 | 0 | 0 | 0 | 0 | 1 | 3 |
| <u>MAEL</u>     | 1 | 1 | 0 | 1 | 0 | 0 | 0 | 0 | 0 | 0 | 3 |
| <u>UBASH3B</u>  | 1 | 1 | 0 | 1 | 0 | 0 | 0 | 0 | 0 | 0 | 3 |
| <u>PPFIBP1</u>  | 1 | 1 | 0 | 1 | 0 | 0 | 0 | 0 | 0 | 0 | 3 |
| <u>RANBP3</u>   | 1 | 0 | 0 | 1 | 0 | 0 | 0 | 0 | 0 | 1 | 3 |
| <u>RANBP3</u>   | 1 | 0 | 0 | 1 | 0 | 0 | 0 | 0 | 0 | 1 | 3 |
| <u>ARHGAP19</u> | 1 | 1 | 0 | 1 | 0 | 0 | 0 | 0 | 0 | 0 | 3 |
| <u>PIGY</u>     | 1 | 1 | 0 | 1 | 0 | 0 | 0 | 0 | 0 | 0 | 3 |
| <u>USP45</u>    | 0 | 1 | 0 | 1 | 0 | 0 | 0 | 0 | 0 | 1 | 3 |
| <u>PIK3R3</u>   | 1 | 0 | 0 | 1 | 0 | 0 | 0 | 0 | 0 | 1 | 3 |
| <u>GAS7</u>     | 1 | 0 | 0 | 1 | 0 | 0 | 0 | 0 | 0 | 1 | 3 |

|                  |   |   |   |   |   |   |   |   |   |   |   |
|------------------|---|---|---|---|---|---|---|---|---|---|---|
| <u>GAS7</u>      | 1 | 0 | 0 | 1 | 0 | 0 | 0 | 0 | 0 | 1 | 3 |
| <u>GAS7</u>      | 1 | 0 | 0 | 1 | 0 | 0 | 0 | 0 | 0 | 1 | 3 |
| <u>DDO</u>       | 1 | 0 | 0 | 1 | 0 | 0 | 0 | 0 | 0 | 1 | 3 |
| <u>CNTNAP4</u>   | 1 | 0 | 0 | 1 | 0 | 0 | 0 | 0 | 0 | 1 | 3 |
| <u>CGGBP1</u>    | 1 | 0 | 0 | 1 | 0 | 0 | 0 | 0 | 0 | 1 | 3 |
| <u>KIAA1751</u>  | 1 | 1 | 0 | 1 | 0 | 0 | 0 | 0 | 0 | 0 | 3 |
| <u>DIXDC1</u>    | 1 | 0 | 0 | 1 | 0 | 0 | 0 | 0 | 0 | 1 | 3 |
| <u>TANC1</u>     | 1 | 1 | 0 | 1 | 0 | 0 | 0 | 0 | 0 | 0 | 3 |
| <u>CDC14B</u>    | 1 | 0 | 0 | 1 | 0 | 0 | 0 | 0 | 0 | 1 | 3 |
| <u>CDC14B</u>    | 1 | 0 | 0 | 1 | 0 | 0 | 0 | 0 | 0 | 1 | 3 |
| <u>MADD</u>      | 1 | 0 | 0 | 1 | 0 | 0 | 0 | 0 | 0 | 1 | 3 |
| <u>MADD</u>      | 1 | 0 | 0 | 1 | 0 | 0 | 0 | 0 | 0 | 1 | 3 |
| <u>MADD</u>      | 1 | 0 | 0 | 1 | 0 | 0 | 0 | 0 | 0 | 1 | 3 |
| <u>MADD</u>      | 1 | 0 | 0 | 1 | 0 | 0 | 0 | 0 | 0 | 1 | 3 |
| <u>MADD</u>      | 1 | 0 | 0 | 1 | 0 | 0 | 0 | 0 | 0 | 1 | 3 |
| <u>KHSRP</u>     | 0 | 1 | 0 | 1 | 0 | 0 | 0 | 0 | 0 | 1 | 3 |
| <u>CASK</u>      | 1 | 1 | 0 | 1 | 0 | 0 | 0 | 0 | 0 | 0 | 3 |
| <u>GTPBP10</u>   | 1 | 0 | 0 | 1 | 0 | 0 | 0 | 0 | 0 | 1 | 3 |
| <u>TP63</u>      | 1 | 0 | 0 | 1 | 0 | 0 | 0 | 0 | 0 | 1 | 3 |
| <u>TP63</u>      | 1 | 0 | 0 | 1 | 0 | 0 | 0 | 0 | 0 | 1 | 3 |
| <u>JRK</u>       | 0 | 1 | 0 | 1 | 0 | 0 | 0 | 0 | 0 | 1 | 3 |
| <u>ABCB11</u>    | 1 | 1 | 0 | 1 | 0 | 0 | 0 | 0 | 0 | 0 | 3 |
| <u>DDX3Y</u>     | 1 | 0 | 0 | 1 | 0 | 0 | 0 | 0 | 0 | 1 | 3 |
| <u>PDE5A</u>     | 1 | 0 | 0 | 1 | 0 | 0 | 0 | 0 | 0 | 1 | 3 |
| <u>SLC4A4</u>    | 1 | 0 | 0 | 1 | 0 | 0 | 0 | 0 | 0 | 1 | 3 |
| <u>GALNT4</u>    | 0 | 1 | 0 | 1 | 0 | 0 | 0 | 0 | 0 | 1 | 3 |
| <u>TNK1</u>      | 0 | 1 | 0 | 1 | 0 | 0 | 0 | 0 | 0 | 1 | 3 |
| <u>TRADD</u>     | 1 | 1 | 0 | 1 | 0 | 0 | 0 | 0 | 0 | 0 | 3 |
| <u>C19orf2</u>   | 1 | 0 | 0 | 1 | 0 | 0 | 0 | 0 | 0 | 1 | 3 |
| <u>ADAM19</u>    | 1 | 1 | 0 | 1 | 0 | 0 | 0 | 0 | 0 | 0 | 3 |
| <u>GBF1</u>      | 1 | 1 | 0 | 1 | 0 | 0 | 0 | 0 | 0 | 0 | 3 |
| <u>RIOK3</u>     | 0 | 1 | 0 | 1 | 0 | 0 | 0 | 0 | 0 | 1 | 3 |
| <u>TNFRSF10B</u> | 1 | 0 | 0 | 1 | 0 | 0 | 0 | 0 | 0 | 1 | 3 |
| <u>CCNK</u>      | 0 | 1 | 0 | 1 | 0 | 0 | 0 | 0 | 0 | 1 | 3 |
| <u>INPP4B</u>    | 0 | 1 | 0 | 1 | 0 | 0 | 0 | 0 | 0 | 1 | 3 |
| <u>CES2</u>      | 1 | 1 | 0 | 1 | 0 | 0 | 0 | 0 | 0 | 0 | 3 |
| <u>IQGAP1</u>    | 1 | 1 | 0 | 1 | 0 | 0 | 0 | 0 | 0 | 0 | 3 |
| <u>CCBL1</u>     | 1 | 1 | 0 | 1 | 0 | 0 | 0 | 0 | 0 | 0 | 3 |
| <u>AKAP4</u>     | 1 | 0 | 0 | 1 | 0 | 0 | 0 | 0 | 0 | 1 | 3 |
| <u>DDEF2</u>     | 1 | 1 | 0 | 1 | 0 | 0 | 0 | 0 | 0 | 0 | 3 |
| <u>VNN2</u>      | 1 | 0 | 0 | 1 | 0 | 0 | 0 | 0 | 0 | 1 | 3 |

|                 |   |   |   |   |   |   |   |   |   |   |   |
|-----------------|---|---|---|---|---|---|---|---|---|---|---|
| <u>KRIT1</u>    | 1 | 0 | 0 | 1 | 0 | 0 | 0 | 0 | 0 | 1 | 3 |
| <u>KRIT1</u>    | 1 | 0 | 0 | 1 | 0 | 0 | 0 | 0 | 0 | 1 | 3 |
| <u>MTMR3</u>    | 0 | 1 | 0 | 1 | 0 | 0 | 0 | 0 | 0 | 1 | 3 |
| <u>GYG2</u>     | 1 | 1 | 0 | 1 | 0 | 0 | 0 | 0 | 0 | 0 | 3 |
| <u>TRIM4</u>    | 1 | 1 | 0 | 1 | 0 | 0 | 0 | 0 | 0 | 0 | 3 |
| <u>MBD2</u>     | 1 | 1 | 0 | 1 | 0 | 0 | 0 | 0 | 0 | 0 | 3 |
| <u>SKAP2</u>    | 1 | 1 | 0 | 1 | 0 | 0 | 0 | 0 | 0 | 0 | 3 |
| <u>WASF1</u>    | 1 | 0 | 0 | 1 | 0 | 0 | 0 | 0 | 0 | 1 | 3 |
| <u>WASF1</u>    | 1 | 0 | 0 | 1 | 0 | 0 | 0 | 0 | 0 | 1 | 3 |
| <u>WASF1</u>    | 1 | 0 | 0 | 1 | 0 | 0 | 0 | 0 | 0 | 1 | 3 |
| <u>AP3D1</u>    | 1 | 0 | 0 | 1 | 0 | 0 | 0 | 0 | 0 | 1 | 3 |
| <u>BTRC</u>     | 1 | 0 | 0 | 1 | 0 | 0 | 0 | 0 | 0 | 1 | 3 |
| <u>P4HA2</u>    | 1 | 0 | 0 | 1 | 0 | 0 | 0 | 0 | 0 | 1 | 3 |
| <u>P4HA2</u>    | 1 | 0 | 0 | 1 | 0 | 0 | 0 | 0 | 0 | 1 | 3 |
| <u>P4HA2</u>    | 1 | 0 | 0 | 1 | 0 | 0 | 0 | 0 | 0 | 1 | 3 |
| <u>HPS4</u>     | 1 | 0 | 0 | 1 | 0 | 0 | 0 | 0 | 0 | 1 | 3 |
| <u>FAM125B</u>  | 0 | 1 | 0 | 1 | 0 | 0 | 0 | 0 | 0 | 1 | 3 |
| <u>KLHL6</u>    | 1 | 1 | 0 | 1 | 0 | 0 | 0 | 0 | 0 | 0 | 3 |
| <u>SLC25A21</u> | 1 | 1 | 0 | 1 | 0 | 0 | 0 | 0 | 0 | 0 | 3 |
| <u>HSPB3</u>    | 1 | 1 | 0 | 1 | 0 | 0 | 0 | 0 | 0 | 0 | 3 |
| <u>KALRN</u>    | 1 | 0 | 0 | 1 | 0 | 0 | 0 | 0 | 0 | 1 | 3 |
| <u>CCNG1</u>    | 1 | 0 | 0 | 1 | 0 | 0 | 0 | 0 | 0 | 1 | 3 |
| <u>UBE2CBP</u>  | 0 | 1 | 0 | 1 | 0 | 0 | 0 | 0 | 0 | 1 | 3 |
| <u>PHLDB2</u>   | 1 | 0 | 0 | 1 | 0 | 0 | 0 | 0 | 0 | 1 | 3 |
| <u>PHLDB2</u>   | 1 | 0 | 0 | 1 | 0 | 0 | 0 | 0 | 0 | 1 | 3 |
| <u>TAF1A</u>    | 0 | 1 | 0 | 1 | 0 | 0 | 0 | 0 | 0 | 1 | 3 |
| <u>ZSWIM1</u>   | 0 | 1 | 0 | 1 | 0 | 0 | 0 | 0 | 0 | 1 | 3 |
| <u>C5orf30</u>  | 1 | 1 | 0 | 1 | 0 | 0 | 0 | 0 | 0 | 0 | 3 |
| <u>SPAG9</u>    | 1 | 0 | 0 | 1 | 0 | 0 | 0 | 0 | 0 | 1 | 3 |
| <u>C12orf23</u> | 0 | 1 | 0 | 1 | 0 | 0 | 0 | 0 | 0 | 1 | 3 |
| <u>CCDC109A</u> | 1 | 1 | 0 | 1 | 0 | 0 | 0 | 0 | 0 | 0 | 3 |
| <u>COX19</u>    | 0 | 1 | 0 | 1 | 0 | 0 | 0 | 0 | 0 | 1 | 3 |
| <u>CLDN10</u>   | 1 | 0 | 0 | 1 | 0 | 0 | 0 | 0 | 0 | 1 | 3 |
| <u>FAM104B</u>  | 1 | 1 | 0 | 1 | 0 | 0 | 0 | 0 | 0 | 0 | 3 |
| <u>ZNF598</u>   | 1 | 1 | 0 | 1 | 0 | 0 | 0 | 0 | 0 | 0 | 3 |
| <u>ZNF697</u>   | 0 | 1 | 0 | 1 | 0 | 0 | 0 | 0 | 0 | 1 | 3 |
| <u>USP14</u>    | 1 | 0 | 0 | 1 | 0 | 0 | 0 | 0 | 0 | 1 | 3 |
| <u>CCDC149</u>  | 0 | 1 | 0 | 1 | 0 | 0 | 0 | 0 | 0 | 1 | 3 |
| <u>CD1C</u>     | 1 | 1 | 0 | 1 | 0 | 0 | 0 | 0 | 0 | 0 | 3 |
| <u>L3MBTL4</u>  | 0 | 1 | 0 | 1 | 0 | 0 | 0 | 0 | 0 | 1 | 3 |
| <u>CD1E</u>     | 1 | 0 | 0 | 1 | 0 | 0 | 0 | 0 | 0 | 1 | 3 |

|                   |   |   |   |   |   |   |   |   |   |   |   |
|-------------------|---|---|---|---|---|---|---|---|---|---|---|
| <u>CD1E</u>       | 1 | 0 | 0 | 1 | 0 | 0 | 0 | 0 | 0 | 1 | 3 |
| <u>CD1E</u>       | 1 | 0 | 0 | 1 | 0 | 0 | 0 | 0 | 0 | 1 | 3 |
| <u>CD1E</u>       | 1 | 0 | 0 | 1 | 0 | 0 | 0 | 0 | 0 | 1 | 3 |
| <u>CDKN2AIPNL</u> | 0 | 1 | 0 | 1 | 0 | 0 | 0 | 0 | 0 | 1 | 3 |
| <u>CBFA2T2</u>    | 1 | 0 | 0 | 1 | 0 | 0 | 0 | 0 | 0 | 1 | 3 |
| <u>ZNF502</u>     | 1 | 1 | 0 | 1 | 0 | 0 | 0 | 0 | 0 | 0 | 3 |
| <u>EXO1</u>       | 1 | 1 | 0 | 1 | 0 | 0 | 0 | 0 | 0 | 0 | 3 |
| <u>SLFN11</u>     | 0 | 1 | 0 | 1 | 0 | 0 | 0 | 0 | 0 | 1 | 3 |
| <u>SLFN11</u>     | 1 | 0 | 0 | 1 | 0 | 0 | 0 | 0 | 0 | 1 | 3 |
| <u>SLFN11</u>     | 1 | 0 | 0 | 1 | 0 | 0 | 0 | 0 | 0 | 1 | 3 |
| <u>MYADM</u>      | 1 | 0 | 0 | 1 | 0 | 0 | 0 | 0 | 0 | 1 | 3 |
| <u>MYADM</u>      | 1 | 0 | 0 | 1 | 0 | 0 | 0 | 0 | 0 | 1 | 3 |
| <u>MYADM</u>      | 1 | 0 | 0 | 1 | 0 | 0 | 0 | 0 | 0 | 1 | 3 |
| <u>NEK9</u>       | 1 | 1 | 0 | 1 | 0 | 0 | 0 | 0 | 0 | 0 | 3 |
| <u>CABLES1</u>    | 1 | 0 | 0 | 1 | 0 | 0 | 0 | 0 | 0 | 1 | 3 |
| <u>ARHGEF2</u>    | 1 | 0 | 0 | 1 | 1 | 0 | 0 | 0 | 0 | 0 | 3 |
| <u>WDR20</u>      | 0 | 0 | 0 | 1 | 1 | 1 | 0 | 0 | 0 | 0 | 3 |
| <u>WDR20</u>      | 0 | 0 | 0 | 1 | 1 | 1 | 0 | 0 | 0 | 0 | 3 |
| <u>REPS2</u>      | 1 | 0 | 0 | 1 | 0 | 0 | 0 | 0 | 0 | 1 | 3 |
| <u>TTC5</u>       | 1 | 1 | 0 | 1 | 0 | 0 | 0 | 0 | 0 | 0 | 3 |
| <u>FAM58A</u>     | 1 | 0 | 0 | 1 | 0 | 0 | 0 | 0 | 0 | 1 | 3 |
| <u>SNX29</u>      | 1 | 1 | 0 | 1 | 0 | 0 | 0 | 0 | 0 | 0 | 3 |
| <u>LRRFIP1</u>    | 1 | 0 | 0 | 1 | 0 | 0 | 0 | 0 | 0 | 1 | 3 |
| <u>NOLC1</u>      | 1 | 1 | 0 | 1 | 0 | 0 | 0 | 0 | 0 | 0 | 3 |
| <u>MAGI1</u>      | 0 | 0 | 0 | 1 | 1 | 0 | 0 | 0 | 0 | 1 | 3 |
| <u>PNMA1</u>      | 0 | 1 | 0 | 1 | 0 | 0 | 0 | 0 | 0 | 1 | 3 |
| <u>RPS6KA5</u>    | 1 | 1 | 0 | 1 | 0 | 0 | 0 | 0 | 0 | 0 | 3 |
| <u>STK17B</u>     | 1 | 1 | 0 | 1 | 0 | 0 | 0 | 0 | 0 | 0 | 3 |
| <u>MED14</u>      | 1 | 1 | 0 | 1 | 0 | 0 | 0 | 0 | 0 | 0 | 3 |
| <u>TRIP13</u>     | 1 | 1 | 0 | 1 | 0 | 0 | 0 | 0 | 0 | 0 | 3 |
| <u>CER1</u>       | 1 | 1 | 0 | 1 | 0 | 0 | 0 | 0 | 0 | 0 | 3 |
| <u>ANUBL1</u>     | 0 | 1 | 0 | 1 | 0 | 0 | 0 | 0 | 0 | 1 | 3 |
| <u>MGC16169</u>   | 1 | 0 | 0 | 1 | 0 | 0 | 0 | 0 | 0 | 1 | 3 |
| <u>CADPS2</u>     | 1 | 0 | 0 | 1 | 0 | 0 | 0 | 0 | 0 | 1 | 3 |
| <u>LIPG</u>       | 1 | 1 | 0 | 1 | 0 | 0 | 0 | 0 | 0 | 0 | 3 |
| <u>TGFBRAP1</u>   | 1 | 0 | 0 | 1 | 0 | 0 | 0 | 0 | 0 | 1 | 3 |
| <u>ACVRL1</u>     | 1 | 0 | 0 | 1 | 0 | 0 | 0 | 0 | 0 | 1 | 3 |
| <u>RECOL5</u>     | 1 | 1 | 0 | 1 | 0 | 0 | 0 | 0 | 0 | 0 | 3 |
| <u>ARHGAP29</u>   | 1 | 1 | 0 | 1 | 0 | 0 | 0 | 0 | 0 | 0 | 3 |
| <u>SYTL4</u>      | 1 | 0 | 0 | 1 | 0 | 0 | 0 | 0 | 0 | 1 | 3 |
| <u>H2AFV</u>      | 0 | 1 | 0 | 1 | 0 | 0 | 0 | 0 | 0 | 1 | 3 |

|                 |   |   |   |   |   |   |   |   |   |   |   |
|-----------------|---|---|---|---|---|---|---|---|---|---|---|
| <u>TP53INP1</u> | 1 | 1 | 0 | 1 | 0 | 0 | 0 | 0 | 0 | 0 | 3 |
| <u>NCR2</u>     | 0 | 1 | 0 | 1 | 0 | 0 | 0 | 0 | 0 | 1 | 3 |
| <u>QKI</u>      | 1 | 0 | 0 | 1 | 0 | 0 | 0 | 0 | 0 | 1 | 3 |
| <u>GGPS1</u>    | 1 | 0 | 0 | 1 | 0 | 0 | 0 | 0 | 0 | 1 | 3 |
| <u>HOMER2</u>   | 1 | 0 | 0 | 1 | 0 | 0 | 0 | 0 | 0 | 1 | 3 |
| <u>HOMER2</u>   | 1 | 0 | 0 | 1 | 0 | 0 | 0 | 0 | 0 | 1 | 3 |
| <u>HOMER2</u>   | 1 | 0 | 0 | 1 | 0 | 0 | 0 | 0 | 0 | 1 | 3 |
| <u>RASAL2</u>   | 1 | 1 | 0 | 1 | 0 | 0 | 0 | 0 | 0 | 0 | 3 |
| <u>AKAP5</u>    | 0 | 1 | 0 | 1 | 0 | 0 | 0 | 0 | 0 | 1 | 3 |
| <u>SLC4A8</u>   | 1 | 0 | 0 | 1 | 0 | 0 | 0 | 0 | 0 | 1 | 3 |
| <u>GAL3ST1</u>  | 1 | 1 | 0 | 1 | 0 | 0 | 0 | 0 | 0 | 0 | 3 |
| <u>SCAMP1</u>   | 1 | 1 | 0 | 1 | 0 | 0 | 0 | 0 | 0 | 0 | 3 |
| <u>BAG5</u>     | 1 | 0 | 0 | 1 | 0 | 0 | 0 | 0 | 0 | 1 | 3 |
| <u>BAG5</u>     | 1 | 0 | 0 | 1 | 0 | 0 | 0 | 0 | 0 | 1 | 3 |
| <u>ENTPD1</u>   | 0 | 1 | 0 | 1 | 0 | 0 | 0 | 0 | 0 | 1 | 3 |
| <u>EI24</u>     | 1 | 1 | 0 | 1 | 0 | 0 | 0 | 0 | 0 | 0 | 3 |
| <u>EI24</u>     | 1 | 1 | 0 | 1 | 0 | 0 | 0 | 0 | 0 | 0 | 3 |
| <u>PUNC</u>     | 0 | 1 | 0 | 1 | 0 | 0 | 0 | 0 | 0 | 1 | 3 |
| <u>PREPL</u>    | 1 | 1 | 0 | 1 | 0 | 0 | 0 | 0 | 0 | 0 | 3 |
| <u>CREB5</u>    | 1 | 0 | 0 | 1 | 0 | 0 | 0 | 0 | 0 | 1 | 3 |
| <u>CREB5</u>    | 1 | 0 | 0 | 1 | 0 | 0 | 0 | 0 | 0 | 1 | 3 |
| <u>CREB5</u>    | 1 | 0 | 0 | 1 | 0 | 0 | 0 | 0 | 0 | 1 | 3 |
| <u>AKAP12</u>   | 1 | 1 | 0 | 1 | 0 | 0 | 0 | 0 | 0 | 0 | 3 |
| <u>RNF14</u>    | 1 | 0 | 0 | 1 | 0 | 0 | 0 | 0 | 0 | 1 | 3 |
| <u>RNF14</u>    | 1 | 0 | 0 | 1 | 0 | 0 | 0 | 0 | 0 | 1 | 3 |
| <u>RNF7</u>     | 1 | 1 | 0 | 1 | 0 | 0 | 0 | 0 | 0 | 0 | 3 |
| <u>RNF7</u>     | 1 | 1 | 0 | 1 | 0 | 0 | 0 | 0 | 0 | 0 | 3 |
| <u>CD48</u>     | 0 | 1 | 0 | 1 | 0 | 0 | 0 | 0 | 0 | 1 | 3 |
| <u>FNIP1</u>    | 0 | 1 | 0 | 1 | 0 | 0 | 0 | 0 | 0 | 1 | 3 |
| <u>SOCS5</u>    | 1 | 0 | 0 | 1 | 0 | 0 | 0 | 0 | 0 | 1 | 3 |
| <u>PDE4DIP</u>  | 0 | 1 | 0 | 1 | 0 | 0 | 0 | 0 | 0 | 1 | 3 |
| <u>CD59</u>     | 1 | 0 | 0 | 1 | 0 | 0 | 0 | 0 | 0 | 1 | 3 |
| <u>CD59</u>     | 1 | 0 | 0 | 1 | 0 | 0 | 0 | 0 | 0 | 1 | 3 |
| <u>CD59</u>     | 1 | 0 | 0 | 1 | 0 | 0 | 0 | 0 | 0 | 1 | 3 |
| <u>CD59</u>     | 1 | 0 | 0 | 1 | 0 | 0 | 0 | 0 | 0 | 1 | 3 |
| <u>CD59</u>     | 1 | 0 | 0 | 1 | 0 | 0 | 0 | 0 | 0 | 1 | 3 |
| <u>SDC3</u>     | 1 | 1 | 0 | 1 | 0 | 0 | 0 | 0 | 0 | 0 | 3 |
| <u>SLC25A44</u> | 1 | 1 | 0 | 1 | 0 | 0 | 0 | 0 | 0 | 0 | 3 |
| <u>ULK2</u>     | 0 | 1 | 0 | 1 | 0 | 0 | 0 | 0 | 0 | 1 | 3 |
| <u>PHACTR2</u>  | 1 | 0 | 0 | 1 | 0 | 0 | 0 | 0 | 0 | 1 | 3 |
| <u>PHACTR2</u>  | 1 | 0 | 0 | 1 | 0 | 0 | 0 | 0 | 0 | 1 | 3 |











|                 |   |   |   |   |   |   |   |   |   |   |   |
|-----------------|---|---|---|---|---|---|---|---|---|---|---|
| <u>LGI2</u>     | 1 | 1 | 0 | 0 | 0 | 0 | 0 | 0 | 0 | 1 | 3 |
| <u>DNAJA4</u>   | 1 | 1 | 0 | 0 | 0 | 0 | 0 | 0 | 0 | 1 | 3 |
| <u>PRCP</u>     | 1 | 1 | 0 | 0 | 0 | 0 | 0 | 0 | 0 | 1 | 3 |
| <u>ETNK1</u>    | 1 | 1 | 0 | 0 | 0 | 0 | 0 | 0 | 0 | 1 | 3 |
| <u>ETNK1</u>    | 1 | 1 | 0 | 0 | 0 | 0 | 0 | 0 | 0 | 1 | 3 |
| <u>SRGN</u>     | 1 | 1 | 0 | 0 | 0 | 0 | 0 | 0 | 0 | 1 | 3 |
| <u>FAM46A</u>   | 1 | 1 | 0 | 0 | 0 | 0 | 0 | 0 | 0 | 1 | 3 |
| <u>DDEFL1</u>   | 1 | 1 | 0 | 0 | 0 | 0 | 0 | 0 | 0 | 1 | 3 |
| <u>KIAA1333</u> | 1 | 1 | 0 | 0 | 0 | 0 | 0 | 0 | 0 | 1 | 3 |
| <u>MBNL3</u>    | 1 | 1 | 0 | 0 | 0 | 0 | 0 | 0 | 0 | 1 | 3 |
| <u>MBNL3</u>    | 1 | 1 | 0 | 0 | 0 | 0 | 0 | 0 | 0 | 1 | 3 |
| <u>FAM54B</u>   | 1 | 1 | 0 | 0 | 0 | 0 | 0 | 0 | 0 | 1 | 3 |
| <u>KIAA1217</u> | 1 | 1 | 0 | 0 | 0 | 0 | 0 | 0 | 0 | 1 | 3 |
| <u>CCBL2</u>    | 1 | 1 | 0 | 0 | 1 | 0 | 0 | 0 | 0 | 0 | 3 |
| <u>ZC3HAV1</u>  | 1 | 1 | 0 | 0 | 0 | 0 | 0 | 0 | 0 | 1 | 3 |
| <u>CASC5</u>    | 1 | 1 | 0 | 0 | 0 | 0 | 0 | 0 | 0 | 1 | 3 |
| <u>LYRM1</u>    | 1 | 1 | 0 | 0 | 0 | 0 | 0 | 0 | 0 | 1 | 3 |
| <u>PHTF2</u>    | 1 | 1 | 0 | 0 | 0 | 0 | 0 | 0 | 0 | 1 | 3 |
| <u>NPAL3</u>    | 1 | 1 | 0 | 0 | 0 | 0 | 0 | 0 | 0 | 1 | 3 |
| <u>GPR126</u>   | 1 | 1 | 0 | 0 | 0 | 0 | 0 | 0 | 0 | 1 | 3 |
| <u>PTGER3</u>   | 1 | 1 | 0 | 0 | 0 | 0 | 0 | 0 | 0 | 1 | 3 |
| <u>HEG1</u>     | 1 | 1 | 0 | 0 | 0 | 0 | 0 | 0 | 0 | 1 | 3 |
| <u>SERINC1</u>  | 1 | 1 | 0 | 0 | 0 | 0 | 0 | 0 | 0 | 1 | 3 |
| <u>ALPK3</u>    | 1 | 1 | 0 | 0 | 0 | 0 | 0 | 0 | 0 | 1 | 3 |
| <u>SIPA1L2</u>  | 1 | 1 | 0 | 0 | 0 | 0 | 0 | 0 | 0 | 1 | 3 |
| <u>PTBP2</u>    | 1 | 1 | 0 | 0 | 0 | 0 | 0 | 0 | 0 | 1 | 3 |
| <u>PEX19</u>    | 1 | 1 | 0 | 0 | 0 | 0 | 0 | 0 | 0 | 1 | 3 |
| <u>QDPR</u>     | 1 | 1 | 0 | 0 | 0 | 0 | 0 | 0 | 0 | 1 | 3 |
| <u>BCHE</u>     | 1 | 1 | 0 | 0 | 0 | 0 | 0 | 0 | 0 | 1 | 3 |
| <u>RFC3</u>     | 1 | 1 | 0 | 0 | 0 | 0 | 0 | 0 | 0 | 1 | 3 |
| <u>AASDHPPT</u> | 1 | 1 | 0 | 0 | 0 | 0 | 0 | 0 | 0 | 1 | 3 |
| <u>MRPL12</u>   | 1 | 1 | 0 | 0 | 0 | 0 | 0 | 0 | 0 | 1 | 3 |
| <u>SORT1</u>    | 1 | 1 | 0 | 0 | 0 | 0 | 0 | 0 | 0 | 1 | 3 |
| <u>ELTD1</u>    | 1 | 1 | 0 | 0 | 0 | 0 | 0 | 0 | 0 | 1 | 3 |
| <u>SFRS7</u>    | 1 | 1 | 0 | 0 | 0 | 0 | 0 | 0 | 0 | 1 | 3 |
| <u>SGCB</u>     | 1 | 1 | 0 | 0 | 0 | 0 | 0 | 0 | 0 | 1 | 3 |
| <u>CCDC14</u>   | 1 | 1 | 0 | 0 | 0 | 0 | 0 | 0 | 0 | 1 | 3 |
| <u>DDX31</u>    | 1 | 1 | 0 | 0 | 0 | 0 | 0 | 0 | 0 | 1 | 3 |
| <u>RFXDC2</u>   | 1 | 1 | 0 | 0 | 0 | 0 | 0 | 0 | 0 | 1 | 3 |
| <u>NDRG4</u>    | 1 | 1 | 0 | 0 | 0 | 0 | 0 | 0 | 0 | 1 | 3 |
| <u>GPBP1</u>    | 1 | 0 | 0 | 0 | 1 | 0 | 0 | 0 | 0 | 1 | 3 |



|                 |   |   |   |   |   |   |   |   |   |   |   |
|-----------------|---|---|---|---|---|---|---|---|---|---|---|
| <u>CNTNAP4</u>  | 1 | 1 | 0 | 0 | 0 | 0 | 0 | 0 | 0 | 1 | 3 |
| <u>DIXDC1</u>   | 1 | 1 | 0 | 0 | 0 | 0 | 0 | 0 | 0 | 1 | 3 |
| <u>MADD</u>     | 1 | 1 | 0 | 0 | 0 | 0 | 0 | 0 | 0 | 1 | 3 |
| <u>TNFSF11</u>  | 1 | 0 | 0 | 0 | 1 | 0 | 0 | 0 | 0 | 1 | 3 |
| <u>RUNX1</u>    | 1 | 1 | 0 | 0 | 0 | 0 | 0 | 0 | 0 | 1 | 3 |
| <u>STC2</u>     | 1 | 1 | 0 | 0 | 0 | 0 | 0 | 0 | 0 | 1 | 3 |
| <u>B4GALT4</u>  | 1 | 1 | 0 | 0 | 0 | 0 | 0 | 0 | 0 | 1 | 3 |
| <u>CRADD</u>    | 1 | 1 | 0 | 0 | 0 | 0 | 0 | 0 | 0 | 1 | 3 |
| <u>ACTN2</u>    | 1 | 1 | 0 | 0 | 0 | 0 | 0 | 0 | 0 | 1 | 3 |
| <u>IL18R1</u>   | 1 | 1 | 0 | 0 | 0 | 0 | 0 | 0 | 0 | 1 | 3 |
| <u>SYNJ1</u>    | 1 | 1 | 0 | 0 | 0 | 0 | 0 | 0 | 0 | 1 | 3 |
| <u>VNN2</u>     | 1 | 1 | 0 | 0 | 0 | 0 | 0 | 0 | 0 | 1 | 3 |
| <u>KRIT1</u>    | 1 | 1 | 0 | 0 | 0 | 0 | 0 | 0 | 0 | 1 | 3 |
| <u>CCNB1</u>    | 1 | 1 | 0 | 0 | 0 | 0 | 0 | 0 | 0 | 1 | 3 |
| <u>TMEM116</u>  | 1 | 1 | 0 | 0 | 0 | 0 | 0 | 0 | 0 | 1 | 3 |
| <u>ZNF468</u>   | 1 | 1 | 0 | 0 | 0 | 0 | 0 | 0 | 0 | 1 | 3 |
| <u>TMSB4Y</u>   | 1 | 1 | 0 | 0 | 0 | 0 | 0 | 0 | 0 | 1 | 3 |
| <u>MTMR7</u>    | 1 | 1 | 0 | 0 | 0 | 0 | 0 | 0 | 0 | 1 | 3 |
| <u>CBFA2T2</u>  | 1 | 1 | 0 | 0 | 0 | 0 | 0 | 0 | 0 | 1 | 3 |
| <u>DGKI</u>     | 1 | 1 | 0 | 0 | 0 | 0 | 0 | 0 | 0 | 1 | 3 |
| <u>REPS2</u>    | 1 | 1 | 0 | 0 | 0 | 0 | 0 | 0 | 0 | 1 | 3 |
| <u>SLC24A1</u>  | 1 | 1 | 0 | 0 | 0 | 0 | 0 | 0 | 0 | 1 | 3 |
| <u>DSEL</u>     | 1 | 1 | 0 | 0 | 0 | 0 | 0 | 0 | 0 | 1 | 3 |
| <u>LRAT</u>     | 1 | 1 | 0 | 0 | 0 | 0 | 0 | 0 | 0 | 1 | 3 |
| <u>NRXN3</u>    | 1 | 0 | 0 | 0 | 1 | 0 | 0 | 0 | 0 | 1 | 3 |
| <u>ZRANB2</u>   | 1 | 1 | 0 | 0 | 0 | 0 | 0 | 0 | 0 | 1 | 3 |
| <u>C21orf66</u> | 1 | 1 | 0 | 0 | 0 | 0 | 0 | 0 | 0 | 1 | 3 |
| <u>QKI</u>      | 1 | 1 | 0 | 0 | 0 | 0 | 0 | 0 | 0 | 1 | 3 |
| <u>HOMER2</u>   | 1 | 1 | 0 | 0 | 0 | 0 | 0 | 0 | 0 | 1 | 3 |
| <u>SLC25A27</u> | 1 | 1 | 0 | 0 | 0 | 0 | 0 | 0 | 0 | 1 | 3 |
| <u>PMPCB</u>    | 1 | 1 | 0 | 0 | 0 | 0 | 0 | 0 | 0 | 1 | 3 |
| <u>ZNF592</u>   | 1 | 1 | 0 | 0 | 0 | 0 | 0 | 0 | 0 | 1 | 3 |
| <u>FAM53B</u>   | 1 | 1 | 0 | 0 | 0 | 0 | 0 | 0 | 0 | 1 | 3 |
| <u>UBE3C</u>    | 1 | 1 | 0 | 0 | 0 | 0 | 0 | 0 | 0 | 1 | 3 |
| <u>PUM1</u>     | 1 | 1 | 0 | 0 | 0 | 0 | 0 | 0 | 0 | 1 | 3 |
| <u>KIAA0152</u> | 1 | 1 | 0 | 0 | 0 | 0 | 0 | 0 | 0 | 1 | 3 |
| <u>GIT2</u>     | 1 | 1 | 0 | 0 | 0 | 0 | 0 | 0 | 0 | 1 | 3 |
| <u>DNAJC6</u>   | 1 | 1 | 0 | 0 | 0 | 0 | 0 | 0 | 0 | 1 | 3 |
| <u>KCNE2</u>    | 1 | 1 | 0 | 0 | 0 | 0 | 0 | 0 | 0 | 1 | 3 |
| <u>FAM44A</u>   | 0 | 1 | 0 | 0 | 1 | 0 | 0 | 0 | 0 | 1 | 3 |
| <u>JARID1A</u>  | 0 | 1 | 0 | 0 | 1 | 0 | 0 | 0 | 0 | 1 | 3 |

|                 |   |   |   |   |   |   |   |   |   |   |   |
|-----------------|---|---|---|---|---|---|---|---|---|---|---|
| <u>ABI1</u>     | 1 | 0 | 0 | 1 | 0 | 0 | 0 | 0 | 0 | 1 | 3 |
| <u>ABI1</u>     | 1 | 0 | 0 | 1 | 0 | 0 | 0 | 0 | 0 | 1 | 3 |
| <u>PDCD6</u>    | 0 | 1 | 0 | 1 | 0 | 0 | 1 | 0 | 0 | 0 | 3 |
| <u>HMG2L1</u>   | 0 | 0 | 0 | 1 | 0 | 0 | 1 | 0 | 0 | 1 | 3 |
| <u>SMC4</u>     | 1 | 1 | 0 | 1 | 0 | 0 | 0 | 0 | 0 | 0 | 3 |
| <u>ACTR2</u>    | 1 | 0 | 0 | 1 | 0 | 0 | 0 | 0 | 0 | 1 | 3 |
| <u>AKAP9</u>    | 0 | 0 | 0 | 1 | 0 | 0 | 1 | 0 | 1 | 0 | 3 |
| <u>FAM13A1</u>  | 1 | 0 | 0 | 1 | 0 | 0 | 0 | 0 | 0 | 1 | 3 |
| <u>G3BP1</u>    | 1 | 1 | 0 | 1 | 0 | 0 | 0 | 0 | 0 | 0 | 3 |
| <u>GPR64</u>    | 1 | 0 | 0 | 1 | 0 | 0 | 0 | 0 | 0 | 1 | 3 |
| <u>GPR64</u>    | 1 | 0 | 0 | 1 | 0 | 0 | 0 | 0 | 0 | 1 | 3 |
| <u>AASS</u>     | 0 | 1 | 0 | 1 | 0 | 0 | 0 | 0 | 0 | 1 | 3 |
| <u>DHRS9</u>    | 1 | 0 | 0 | 1 | 0 | 0 | 0 | 0 | 0 | 1 | 3 |
| <u>ODZ1</u>     | 1 | 0 | 0 | 1 | 0 | 0 | 1 | 0 | 0 | 0 | 3 |
| <u>TRIM13</u>   | 1 | 1 | 0 | 1 | 0 | 0 | 0 | 0 | 0 | 0 | 3 |
| <u>KCNMB2</u>   | 1 | 0 | 0 | 1 | 0 | 0 | 0 | 0 | 0 | 1 | 3 |
| <u>EFS</u>      | 1 | 0 | 0 | 1 | 0 | 0 | 0 | 0 | 0 | 1 | 3 |
| <u>ADAR</u>     | 1 | 0 | 0 | 1 | 0 | 0 | 0 | 0 | 0 | 1 | 3 |
| <u>ADAR</u>     | 1 | 0 | 0 | 1 | 0 | 0 | 0 | 0 | 0 | 1 | 3 |
| <u>ADAR</u>     | 1 | 0 | 0 | 1 | 0 | 0 | 0 | 0 | 0 | 1 | 3 |
| <u>B3GALT5</u>  | 0 | 1 | 0 | 1 | 0 | 0 | 0 | 0 | 0 | 1 | 3 |
| <u>B3GALT5</u>  | 1 | 0 | 0 | 1 | 0 | 0 | 0 | 0 | 0 | 1 | 3 |
| <u>B3GALT5</u>  | 0 | 0 | 0 | 1 | 0 | 0 | 1 | 0 | 0 | 1 | 3 |
| <u>CDKN3</u>    | 1 | 0 | 0 | 1 | 0 | 0 | 0 | 0 | 0 | 1 | 3 |
| <u>DLC1</u>     | 1 | 0 | 0 | 1 | 0 | 0 | 0 | 0 | 0 | 1 | 3 |
| <u>ATP8A1</u>   | 1 | 0 | 0 | 1 | 0 | 0 | 0 | 0 | 0 | 1 | 3 |
| <u>CAP1</u>     | 1 | 1 | 0 | 1 | 0 | 0 | 0 | 0 | 0 | 0 | 3 |
| <u>CAP1</u>     | 1 | 0 | 0 | 1 | 0 | 0 | 1 | 0 | 0 | 0 | 3 |
| <u>ENOX2</u>    | 1 | 0 | 0 | 1 | 0 | 0 | 0 | 0 | 0 | 1 | 3 |
| <u>NEBL</u>     | 1 | 0 | 0 | 1 | 0 | 0 | 0 | 0 | 0 | 1 | 3 |
| <u>PDLIM5</u>   | 1 | 0 | 0 | 1 | 0 | 0 | 0 | 0 | 0 | 1 | 3 |
| <u>ERLIN1</u>   | 1 | 1 | 0 | 1 | 0 | 0 | 0 | 0 | 0 | 0 | 3 |
| <u>ERLIN1</u>   | 1 | 0 | 0 | 1 | 0 | 0 | 1 | 0 | 0 | 0 | 3 |
| <u>RAD51AP1</u> | 1 | 1 | 0 | 1 | 0 | 0 | 0 | 0 | 0 | 0 | 3 |
| <u>IGF2BP2</u>  | 1 | 0 | 0 | 1 | 0 | 0 | 0 | 0 | 0 | 1 | 3 |
| <u>MTX2</u>     | 0 | 0 | 0 | 1 | 0 | 0 | 1 | 0 | 0 | 1 | 3 |
| <u>CUGBP2</u>   | 1 | 0 | 0 | 1 | 0 | 0 | 0 | 0 | 0 | 1 | 3 |
| <u>CUGBP2</u>   | 1 | 0 | 0 | 1 | 0 | 0 | 0 | 0 | 0 | 1 | 3 |
| <u>NFAT5</u>    | 1 | 0 | 0 | 1 | 0 | 0 | 0 | 0 | 0 | 1 | 3 |
| <u>CFL2</u>     | 1 | 0 | 0 | 1 | 0 | 0 | 0 | 0 | 0 | 1 | 3 |
| <u>KLRA1</u>    | 0 | 0 | 0 | 1 | 0 | 0 | 1 | 0 | 0 | 1 | 3 |

|                 |   |   |   |   |   |   |   |   |   |   |   |
|-----------------|---|---|---|---|---|---|---|---|---|---|---|
| <u>CTSC</u>     | 0 | 1 | 0 | 1 | 0 | 0 | 0 | 0 | 0 | 1 | 3 |
| <u>NUP50</u>    | 1 | 0 | 0 | 1 | 0 | 0 | 0 | 0 | 0 | 1 | 3 |
| <u>WDR4</u>     | 1 | 0 | 0 | 1 | 0 | 0 | 1 | 0 | 0 | 0 | 3 |
| <u>GJB6</u>     | 1 | 0 | 0 | 1 | 0 | 0 | 0 | 0 | 0 | 1 | 3 |
| <u>GJB6</u>     | 1 | 0 | 0 | 1 | 0 | 0 | 0 | 0 | 0 | 1 | 3 |
| <u>NPFFR2</u>   | 1 | 0 | 0 | 1 | 0 | 0 | 0 | 0 | 0 | 1 | 3 |
| <u>MALT1</u>    | 1 | 0 | 0 | 1 | 0 | 0 | 0 | 0 | 0 | 1 | 3 |
| <u>TCERG1</u>   | 1 | 0 | 0 | 1 | 0 | 0 | 0 | 0 | 0 | 1 | 3 |
| <u>SUB1</u>     | 1 | 1 | 0 | 1 | 0 | 0 | 0 | 0 | 0 | 0 | 3 |
| <u>SFRS2B</u>   | 0 | 1 | 0 | 1 | 0 | 0 | 1 | 0 | 0 | 0 | 3 |
| <u>PRDX3</u>    | 1 | 0 | 0 | 1 | 0 | 0 | 0 | 0 | 0 | 1 | 3 |
| <u>IFI44L</u>   | 0 | 1 | 0 | 1 | 0 | 0 | 0 | 0 | 0 | 1 | 3 |
| <u>TLK2</u>     | 1 | 0 | 0 | 1 | 0 | 0 | 0 | 0 | 0 | 1 | 3 |
| <u>RAPGEF4</u>  | 1 | 0 | 0 | 1 | 0 | 0 | 0 | 0 | 0 | 1 | 3 |
| <u>DIDO1</u>    | 1 | 0 | 0 | 1 | 0 | 0 | 0 | 0 | 0 | 1 | 3 |
| <u>DIDO1</u>    | 1 | 0 | 0 | 1 | 0 | 0 | 0 | 0 | 0 | 1 | 3 |
| <u>PTPRT</u>    | 1 | 0 | 0 | 1 | 0 | 0 | 0 | 0 | 0 | 1 | 3 |
| <u>ZWINT</u>    | 1 | 1 | 0 | 1 | 0 | 0 | 0 | 0 | 0 | 0 | 3 |
| <u>PSIP1</u>    | 1 | 0 | 0 | 1 | 0 | 0 | 0 | 0 | 0 | 1 | 3 |
| <u>INMT</u>     | 0 | 1 | 0 | 1 | 0 | 0 | 1 | 0 | 0 | 0 | 3 |
| <u>RASSF1</u>   | 1 | 0 | 0 | 1 | 0 | 0 | 0 | 0 | 0 | 1 | 3 |
| <u>RASSF1</u>   | 1 | 0 | 0 | 1 | 0 | 0 | 0 | 0 | 0 | 1 | 3 |
| <u>RASSF1</u>   | 1 | 0 | 0 | 1 | 0 | 0 | 0 | 0 | 0 | 1 | 3 |
| <u>CHKA</u>     | 1 | 0 | 0 | 1 | 0 | 0 | 0 | 0 | 0 | 1 | 3 |
| <u>CHKB</u>     | 0 | 0 | 0 | 1 | 0 | 0 | 1 | 0 | 0 | 1 | 3 |
| <u>HPS5</u>     | 1 | 0 | 0 | 1 | 0 | 0 | 0 | 0 | 0 | 1 | 3 |
| <u>HPS5</u>     | 1 | 0 | 0 | 1 | 0 | 0 | 0 | 0 | 0 | 1 | 3 |
| <u>RNF24</u>    | 0 | 1 | 0 | 1 | 0 | 0 | 0 | 0 | 0 | 1 | 3 |
| <u>LARP4</u>    | 1 | 0 | 0 | 1 | 0 | 0 | 0 | 0 | 0 | 1 | 3 |
| <u>PALM2</u>    | 0 | 1 | 0 | 1 | 0 | 0 | 0 | 0 | 0 | 1 | 3 |
| <u>SLC25A25</u> | 1 | 0 | 0 | 1 | 0 | 0 | 0 | 0 | 0 | 1 | 3 |
| <u>SLC25A25</u> | 1 | 0 | 0 | 1 | 0 | 0 | 0 | 0 | 0 | 1 | 3 |
| <u>PWWP2A</u>   | 0 | 0 | 0 | 1 | 0 | 0 | 1 | 0 | 0 | 1 | 3 |
| <u>FHAD1</u>    | 0 | 1 | 1 | 1 | 0 | 0 | 0 | 0 | 0 | 0 | 3 |
| <u>OSBPL1A</u>  | 1 | 0 | 0 | 1 | 0 | 0 | 0 | 0 | 0 | 1 | 3 |
| <u>CIDEA</u>    | 0 | 1 | 0 | 1 | 0 | 0 | 1 | 0 | 0 | 0 | 3 |
| <u>CISH</u>     | 1 | 0 | 0 | 1 | 0 | 0 | 0 | 0 | 0 | 1 | 3 |
| <u>FAM122A</u>  | 0 | 1 | 0 | 1 | 0 | 0 | 1 | 0 | 0 | 0 | 3 |
| <u>IL22RA2</u>  | 1 | 0 | 0 | 1 | 0 | 0 | 0 | 0 | 0 | 1 | 3 |
| <u>RAB3IP</u>   | 1 | 0 | 0 | 1 | 0 | 0 | 0 | 0 | 0 | 1 | 3 |
| <u>RAB3IP</u>   | 1 | 0 | 0 | 1 | 0 | 0 | 0 | 0 | 0 | 1 | 3 |

|                 |   |   |   |   |   |   |   |   |   |   |   |
|-----------------|---|---|---|---|---|---|---|---|---|---|---|
| <u>ADD1</u>     | 1 | 0 | 0 | 1 | 0 | 0 | 0 | 0 | 0 | 1 | 3 |
| <u>ADD1</u>     | 1 | 0 | 0 | 1 | 0 | 0 | 0 | 0 | 0 | 1 | 3 |
| <u>CLCN5</u>    | 1 | 0 | 0 | 1 | 0 | 0 | 0 | 0 | 0 | 1 | 3 |
| <u>CLCN5</u>    | 1 | 0 | 0 | 1 | 0 | 0 | 0 | 0 | 0 | 1 | 3 |
| <u>ZFYVE27</u>  | 1 | 0 | 0 | 1 | 0 | 0 | 0 | 0 | 0 | 1 | 3 |
| <u>BTBD11</u>   | 1 | 0 | 0 | 1 | 0 | 0 | 0 | 0 | 0 | 1 | 3 |
| <u>TRAPPC6B</u> | 1 | 0 | 0 | 1 | 0 | 0 | 0 | 0 | 0 | 1 | 3 |
| <u>SLC24A4</u>  | 1 | 0 | 0 | 1 | 0 | 0 | 0 | 0 | 0 | 1 | 3 |
| <u>SLC24A4</u>  | 1 | 0 | 0 | 1 | 0 | 0 | 0 | 0 | 0 | 1 | 3 |
| <u>CCR3</u>     | 0 | 0 | 0 | 1 | 0 | 0 | 1 | 0 | 0 | 1 | 3 |
| <u>CCR6</u>     | 1 | 1 | 0 | 1 | 0 | 0 | 0 | 0 | 0 | 0 | 3 |
| <u>CCR6</u>     | 1 | 0 | 0 | 1 | 0 | 0 | 1 | 0 | 0 | 0 | 3 |
| <u>CNGB1</u>    | 1 | 1 | 0 | 1 | 0 | 0 | 0 | 0 | 0 | 0 | 3 |
| <u>CNR1</u>     | 1 | 0 | 0 | 1 | 0 | 0 | 0 | 0 | 0 | 1 | 3 |
| <u>COL6A3</u>   | 1 | 0 | 0 | 1 | 0 | 0 | 0 | 0 | 0 | 1 | 3 |
| <u>COL6A3</u>   | 1 | 0 | 0 | 1 | 0 | 0 | 0 | 0 | 0 | 1 | 3 |
| <u>COL6A3</u>   | 1 | 0 | 0 | 1 | 0 | 0 | 0 | 0 | 0 | 1 | 3 |
| <u>COL6A3</u>   | 1 | 0 | 0 | 1 | 0 | 0 | 0 | 0 | 0 | 1 | 3 |
| <u>ACVR1C</u>   | 1 | 0 | 0 | 1 | 0 | 0 | 0 | 0 | 0 | 1 | 3 |
| <u>ACVR1C</u>   | 1 | 0 | 0 | 1 | 0 | 0 | 0 | 0 | 0 | 1 | 3 |
| <u>ACVR1C</u>   | 1 | 0 | 0 | 1 | 0 | 0 | 0 | 0 | 0 | 1 | 3 |
| <u>FLJ44379</u> | 0 | 1 | 0 | 1 | 0 | 0 | 1 | 0 | 0 | 0 | 3 |
| <u>PABPC4L</u>  | 0 | 1 | 0 | 1 | 0 | 0 | 0 | 0 | 0 | 1 | 3 |
| <u>JMY</u>      | 1 | 1 | 0 | 1 | 0 | 0 | 0 | 0 | 0 | 0 | 3 |
| <u>SRrp35</u>   | 0 | 1 | 0 | 1 | 0 | 0 | 1 | 0 | 0 | 0 | 3 |
| <u>COX15</u>    | 0 | 1 | 0 | 1 | 0 | 0 | 1 | 0 | 0 | 0 | 3 |
| <u>CPT1B</u>    | 0 | 0 | 0 | 1 | 0 | 0 | 1 | 0 | 0 | 1 | 3 |
| <u>CREBBP</u>   | 1 | 0 | 0 | 1 | 0 | 0 | 0 | 0 | 0 | 1 | 3 |
| <u>CREM</u>     | 1 | 1 | 0 | 1 | 0 | 0 | 0 | 0 | 0 | 0 | 3 |
| <u>CREM</u>     | 1 | 0 | 0 | 1 | 0 | 0 | 1 | 0 | 0 | 0 | 3 |
| <u>SIRPA</u>    | 1 | 0 | 0 | 1 | 0 | 0 | 1 | 0 | 0 | 0 | 3 |
| <u>SIRPA</u>    | 1 | 1 | 0 | 1 | 0 | 0 | 0 | 0 | 0 | 0 | 3 |
| <u>B3GALTL</u>  | 0 | 1 | 0 | 1 | 0 | 0 | 1 | 0 | 0 | 0 | 3 |
| <u>ABHD12B</u>  | 1 | 1 | 0 | 1 | 0 | 0 | 0 | 0 | 0 | 0 | 3 |
| <u>VCAN</u>     | 0 | 1 | 1 | 1 | 0 | 0 | 0 | 0 | 0 | 0 | 3 |
| <u>GSG1L</u>    | 1 | 0 | 0 | 1 | 0 | 0 | 0 | 0 | 0 | 1 | 3 |
| <u>CCDC17</u>   | 0 | 1 | 0 | 1 | 0 | 0 | 0 | 0 | 0 | 1 | 3 |
| <u>CTNND1</u>   | 1 | 0 | 0 | 1 | 0 | 0 | 0 | 0 | 0 | 1 | 3 |
| <u>CTNND1</u>   | 1 | 0 | 0 | 1 | 0 | 0 | 0 | 0 | 0 | 1 | 3 |
| <u>CTNND1</u>   | 1 | 0 | 0 | 1 | 0 | 0 | 0 | 0 | 0 | 1 | 3 |
| <u>CTNND1</u>   | 1 | 0 | 0 | 1 | 0 | 0 | 0 | 0 | 0 | 1 | 3 |



|                |   |   |   |   |   |   |   |   |   |   |   |
|----------------|---|---|---|---|---|---|---|---|---|---|---|
| <u>CTNND1</u>  | 1 | 0 | 0 | 1 | 0 | 0 | 0 | 0 | 0 | 1 | 3 |
| <u>CTNND1</u>  | 1 | 0 | 0 | 1 | 0 | 0 | 0 | 0 | 0 | 1 | 3 |
| <u>CTNND1</u>  | 1 | 0 | 0 | 1 | 0 | 0 | 0 | 0 | 0 | 1 | 3 |
| <u>NFAM1</u>   | 0 | 1 | 0 | 1 | 0 | 0 | 1 | 0 | 0 | 0 | 3 |
| <u>TTC30B</u>  | 0 | 1 | 0 | 1 | 0 | 0 | 1 | 0 | 0 | 0 | 3 |
| <u>FAM119A</u> | 0 | 1 | 0 | 1 | 0 | 0 | 0 | 0 | 0 | 1 | 3 |
| <u>RNF38</u>   | 1 | 0 | 0 | 1 | 0 | 0 | 0 | 0 | 0 | 1 | 3 |
| <u>RNF38</u>   | 1 | 0 | 0 | 1 | 0 | 0 | 0 | 0 | 0 | 1 | 3 |
| <u>CNTN4</u>   | 0 | 0 | 0 | 1 | 1 | 0 | 0 | 0 | 0 | 1 | 3 |
| <u>CCDC112</u> | 1 | 1 | 0 | 1 | 0 | 0 | 0 | 0 | 0 | 0 | 3 |
| <u>CYLD</u>    | 1 | 0 | 0 | 1 | 0 | 0 | 0 | 0 | 0 | 1 | 3 |
| <u>CYP11B1</u> | 1 | 0 | 0 | 1 | 0 | 0 | 0 | 0 | 0 | 1 | 3 |
| <u>CYP26A1</u> | 0 | 1 | 0 | 1 | 0 | 0 | 0 | 0 | 0 | 1 | 3 |
| <u>DCN</u>     | 1 | 0 | 0 | 1 | 0 | 0 | 0 | 0 | 0 | 1 | 3 |
| <u>DCN</u>     | 1 | 0 | 0 | 1 | 0 | 0 | 0 | 0 | 0 | 1 | 3 |
| <u>PAP2D</u>   | 1 | 0 | 0 | 1 | 0 | 0 | 0 | 0 | 0 | 1 | 3 |
| <u>DCX</u>     | 1 | 0 | 0 | 1 | 0 | 0 | 0 | 0 | 0 | 1 | 3 |
| <u>DCX</u>     | 1 | 0 | 0 | 1 | 0 | 0 | 0 | 0 | 0 | 1 | 3 |
| <u>AES</u>     | 1 | 0 | 0 | 1 | 0 | 0 | 0 | 0 | 0 | 1 | 3 |
| <u>RASSF6</u>  | 1 | 0 | 0 | 1 | 0 | 0 | 0 | 0 | 0 | 1 | 3 |
| <u>GLIS3</u>   | 1 | 0 | 0 | 1 | 0 | 0 | 0 | 0 | 0 | 1 | 3 |
| <u>COMMD6</u>  | 1 | 0 | 0 | 1 | 0 | 0 | 0 | 0 | 0 | 1 | 3 |
| <u>KCNG3</u>   | 1 | 0 | 0 | 1 | 0 | 0 | 0 | 0 | 0 | 1 | 3 |
| <u>DIAPH1</u>  | 1 | 0 | 0 | 1 | 0 | 0 | 0 | 0 | 0 | 1 | 3 |
| <u>DLX1</u>    | 1 | 1 | 0 | 1 | 0 | 0 | 0 | 0 | 0 | 0 | 3 |
| <u>AGL</u>     | 1 | 0 | 0 | 1 | 0 | 0 | 0 | 0 | 0 | 1 | 3 |
| <u>AGL</u>     | 1 | 0 | 0 | 1 | 0 | 0 | 0 | 0 | 0 | 1 | 3 |
| <u>AGL</u>     | 1 | 0 | 0 | 1 | 0 | 0 | 0 | 0 | 0 | 1 | 3 |
| <u>AGL</u>     | 1 | 0 | 0 | 1 | 0 | 0 | 0 | 0 | 0 | 1 | 3 |
| <u>DPP6</u>    | 0 | 0 | 0 | 1 | 0 | 0 | 1 | 0 | 0 | 1 | 3 |
| <u>DPP6</u>    | 1 | 0 | 0 | 1 | 0 | 0 | 0 | 0 | 0 | 1 | 3 |
| <u>DPP6</u>    | 0 | 1 | 0 | 1 | 0 | 0 | 0 | 0 | 0 | 1 | 3 |
| <u>DTNA</u>    | 0 | 1 | 0 | 1 | 0 | 0 | 0 | 0 | 0 | 1 | 3 |
| <u>DTNA</u>    | 1 | 0 | 0 | 1 | 0 | 0 | 0 | 0 | 0 | 1 | 3 |
| <u>DTNA</u>    | 0 | 0 | 0 | 1 | 1 | 0 | 0 | 0 | 0 | 1 | 3 |
| <u>DTNA</u>    | 1 | 0 | 0 | 1 | 0 | 0 | 0 | 0 | 0 | 1 | 3 |
| <u>DTNA</u>    | 0 | 0 | 0 | 1 | 1 | 0 | 0 | 0 | 0 | 1 | 3 |
| <u>AGTR1</u>   | 1 | 0 | 0 | 1 | 0 | 0 | 0 | 0 | 0 | 1 | 3 |
| <u>AGTR1</u>   | 0 | 1 | 0 | 1 | 0 | 0 | 0 | 0 | 0 | 1 | 3 |
| <u>AGTR1</u>   | 1 | 0 | 0 | 1 | 0 | 0 | 0 | 0 | 0 | 1 | 3 |
| <u>E2F5</u>    | 1 | 0 | 0 | 1 | 0 | 0 | 0 | 0 | 0 | 1 | 3 |

|                 |   |   |   |   |   |   |   |   |   |   |   |
|-----------------|---|---|---|---|---|---|---|---|---|---|---|
| <u>EDNRB</u>    | 1 | 1 | 0 | 1 | 0 | 0 | 0 | 0 | 0 | 0 | 3 |
| <u>EDNRB</u>    | 1 | 0 | 0 | 1 | 0 | 0 | 0 | 1 | 0 | 0 | 3 |
| <u>ELAVL3</u>   | 1 | 0 | 0 | 1 | 0 | 0 | 0 | 0 | 0 | 1 | 3 |
| <u>ELAVL4</u>   | 1 | 1 | 0 | 1 | 0 | 0 | 0 | 0 | 0 | 0 | 3 |
| <u>FAM76A</u>   | 1 | 0 | 0 | 1 | 0 | 0 | 1 | 0 | 0 | 0 | 3 |
| <u>KRTCAP2</u>  | 0 | 1 | 0 | 1 | 0 | 0 | 0 | 0 | 0 | 1 | 3 |
| <u>SLC39A11</u> | 1 | 0 | 0 | 1 | 0 | 0 | 1 | 0 | 0 | 0 | 3 |
| <u>ENSA</u>     | 0 | 1 | 0 | 1 | 0 | 0 | 0 | 0 | 0 | 1 | 3 |
| <u>EPB41</u>    | 1 | 0 | 0 | 1 | 0 | 0 | 0 | 0 | 0 | 1 | 3 |
| <u>HIPK1</u>    | 1 | 0 | 0 | 1 | 0 | 0 | 0 | 0 | 0 | 1 | 3 |
| <u>HIPK1</u>    | 1 | 0 | 0 | 1 | 0 | 0 | 0 | 0 | 0 | 1 | 3 |
| <u>SLC44A5</u>  | 1 | 1 | 0 | 1 | 0 | 0 | 0 | 0 | 0 | 0 | 3 |
| <u>C3orf58</u>  | 1 | 0 | 0 | 1 | 0 | 0 | 0 | 0 | 0 | 1 | 3 |
| <u>ERBB4</u>    | 1 | 0 | 0 | 1 | 0 | 0 | 0 | 0 | 0 | 1 | 3 |
| <u>ESR1</u>     | 1 | 0 | 0 | 1 | 0 | 0 | 0 | 0 | 0 | 1 | 3 |
| <u>ESRRG</u>    | 1 | 1 | 0 | 1 | 0 | 0 | 0 | 0 | 0 | 0 | 3 |
| <u>ESRRG</u>    | 1 | 0 | 0 | 1 | 0 | 0 | 1 | 0 | 0 | 0 | 3 |
| <u>FANCF</u>    | 0 | 1 | 0 | 1 | 0 | 0 | 1 | 0 | 0 | 0 | 3 |
| <u>TYSND1</u>   | 1 | 1 | 0 | 1 | 0 | 0 | 0 | 0 | 0 | 0 | 3 |
| <u>GPR116</u>   | 1 | 0 | 0 | 1 | 0 | 0 | 0 | 0 | 0 | 1 | 3 |
| <u>C10orf30</u> | 0 | 1 | 0 | 1 | 0 | 0 | 1 | 0 | 0 | 0 | 3 |
| <u>FGF1</u>     | 0 | 1 | 0 | 1 | 0 | 0 | 0 | 0 | 0 | 1 | 3 |
| <u>FGF12</u>    | 1 | 0 | 0 | 1 | 0 | 0 | 0 | 0 | 0 | 1 | 3 |
| <u>FGFR1</u>    | 1 | 0 | 0 | 1 | 0 | 0 | 0 | 0 | 0 | 1 | 3 |
| <u>FGFR1</u>    | 1 | 0 | 0 | 1 | 0 | 0 | 0 | 0 | 0 | 1 | 3 |
| <u>FGFR1</u>    | 1 | 0 | 0 | 1 | 0 | 0 | 0 | 0 | 0 | 1 | 3 |
| <u>TFEC</u>     | 1 | 0 | 0 | 1 | 0 | 0 | 0 | 0 | 0 | 1 | 3 |
| <u>ICK</u>      | 1 | 1 | 0 | 1 | 0 | 0 | 0 | 0 | 0 | 0 | 3 |
| <u>ICK</u>      | 1 | 0 | 0 | 1 | 0 | 0 | 1 | 0 | 0 | 0 | 3 |
| <u>DIS3</u>     | 1 | 0 | 0 | 1 | 0 | 0 | 0 | 0 | 0 | 1 | 3 |
| <u>EPN2</u>     | 1 | 0 | 0 | 1 | 0 | 0 | 0 | 0 | 0 | 1 | 3 |
| <u>EPN2</u>     | 1 | 0 | 0 | 1 | 0 | 0 | 0 | 0 | 0 | 1 | 3 |
| <u>NCBP2</u>    | 1 | 0 | 0 | 1 | 0 | 0 | 0 | 0 | 0 | 1 | 3 |
| <u>FBXO21</u>   | 1 | 0 | 0 | 1 | 0 | 0 | 0 | 0 | 0 | 1 | 3 |
| <u>TMCC1</u>    | 1 | 0 | 0 | 1 | 0 | 0 | 0 | 0 | 0 | 1 | 3 |
| <u>NMNAT2</u>   | 1 | 0 | 0 | 1 | 0 | 0 | 0 | 0 | 0 | 1 | 3 |
| <u>PEG10</u>    | 0 | 0 | 0 | 1 | 0 | 0 | 1 | 0 | 0 | 1 | 3 |
| <u>PEG10</u>    | 0 | 1 | 0 | 1 | 0 | 0 | 0 | 0 | 0 | 1 | 3 |
| <u>KIF1B</u>    | 1 | 1 | 0 | 1 | 0 | 0 | 0 | 0 | 0 | 0 | 3 |
| <u>TNRC6B</u>   | 1 | 0 | 0 | 1 | 0 | 0 | 0 | 0 | 0 | 1 | 3 |
| <u>CLCC1</u>    | 1 | 0 | 0 | 1 | 0 | 0 | 0 | 0 | 0 | 1 | 3 |

|                 |   |   |   |   |   |   |   |   |   |   |   |
|-----------------|---|---|---|---|---|---|---|---|---|---|---|
| <u>SNX13</u>    | 1 | 1 | 0 | 1 | 0 | 0 | 0 | 0 | 0 | 0 | 3 |
| <u>SEPT7</u>    | 1 | 0 | 0 | 1 | 0 | 0 | 0 | 0 | 0 | 1 | 3 |
| <u>SEPT7</u>    | 1 | 0 | 0 | 1 | 0 | 0 | 0 | 0 | 0 | 1 | 3 |
| <u>ATG4B</u>    | 1 | 1 | 0 | 1 | 0 | 0 | 0 | 0 | 0 | 0 | 3 |
| <u>ATG4B</u>    | 1 | 1 | 0 | 1 | 0 | 0 | 0 | 0 | 0 | 0 | 3 |
| <u>PSME4</u>    | 0 | 1 | 0 | 1 | 0 | 0 | 0 | 0 | 0 | 1 | 3 |
| <u>FBXO28</u>   | 0 | 1 | 0 | 1 | 0 | 0 | 1 | 0 | 0 | 0 | 3 |
| <u>VPS13A</u>   | 1 | 0 | 0 | 1 | 0 | 0 | 0 | 0 | 0 | 1 | 3 |
| <u>PACS2</u>    | 1 | 0 | 0 | 1 | 0 | 0 | 0 | 0 | 0 | 1 | 3 |
| <u>ANKRD12</u>  | 1 | 0 | 0 | 1 | 0 | 0 | 0 | 0 | 0 | 1 | 3 |
| <u>TMEM194</u>  | 1 | 0 | 0 | 1 | 0 | 0 | 0 | 0 | 0 | 1 | 3 |
| <u>WDR7</u>     | 1 | 0 | 0 | 1 | 0 | 0 | 0 | 0 | 0 | 1 | 3 |
| <u>FREQ</u>     | 1 | 0 | 0 | 1 | 0 | 0 | 0 | 0 | 0 | 1 | 3 |
| <u>SLC39A14</u> | 1 | 0 | 0 | 1 | 0 | 0 | 0 | 0 | 0 | 1 | 3 |
| <u>SLC39A14</u> | 1 | 0 | 0 | 1 | 0 | 0 | 0 | 0 | 0 | 1 | 3 |
| <u>NNT</u>      | 0 | 0 | 0 | 1 | 0 | 0 | 1 | 0 | 0 | 1 | 3 |
| <u>NNT</u>      | 0 | 1 | 0 | 1 | 0 | 0 | 0 | 0 | 0 | 1 | 3 |
| <u>ZMYND8</u>   | 1 | 0 | 0 | 1 | 1 | 0 | 0 | 0 | 0 | 0 | 3 |
| <u>ZMYND8</u>   | 1 | 0 | 0 | 1 | 1 | 0 | 0 | 0 | 0 | 0 | 3 |
| <u>SGK3</u>     | 1 | 0 | 0 | 1 | 0 | 0 | 0 | 0 | 0 | 1 | 3 |
| <u>SGK3</u>     | 1 | 0 | 0 | 1 | 0 | 0 | 0 | 0 | 0 | 1 | 3 |
| <u>VGLL2</u>    | 1 | 0 | 0 | 1 | 0 | 0 | 0 | 0 | 0 | 1 | 3 |
| <u>CENPI</u>    | 0 | 1 | 0 | 1 | 0 | 0 | 0 | 0 | 0 | 1 | 3 |
| <u>C22orf30</u> | 1 | 1 | 0 | 1 | 0 | 0 | 0 | 0 | 0 | 0 | 3 |
| <u>FYB</u>      | 1 | 0 | 0 | 1 | 0 | 0 | 0 | 0 | 0 | 1 | 3 |
| <u>GABRA1</u>   | 1 | 0 | 0 | 1 | 0 | 0 | 0 | 0 | 0 | 1 | 3 |
| <u>GABRA1</u>   | 1 | 0 | 0 | 1 | 0 | 0 | 0 | 0 | 0 | 1 | 3 |
| <u>GABRA1</u>   | 1 | 0 | 0 | 1 | 0 | 0 | 0 | 0 | 0 | 1 | 3 |
| <u>GABRA1</u>   | 1 | 0 | 0 | 1 | 0 | 0 | 0 | 0 | 0 | 1 | 3 |
| <u>GABRA1</u>   | 1 | 0 | 0 | 1 | 0 | 0 | 0 | 0 | 0 | 1 | 3 |
| <u>GABRB2</u>   | 1 | 0 | 0 | 1 | 0 | 0 | 0 | 0 | 0 | 1 | 3 |
| <u>GABRG2</u>   | 1 | 0 | 0 | 1 | 0 | 0 | 0 | 0 | 0 | 1 | 3 |
| <u>GAD2</u>     | 1 | 1 | 0 | 1 | 0 | 0 | 0 | 0 | 0 | 0 | 3 |
| <u>KLK5</u>     | 1 | 1 | 0 | 1 | 0 | 0 | 0 | 0 | 0 | 0 | 3 |
| <u>KLK5</u>     | 1 | 0 | 0 | 1 | 0 | 0 | 1 | 0 | 0 | 0 | 3 |
| <u>GALK2</u>    | 1 | 0 | 0 | 1 | 0 | 0 | 1 | 0 | 0 | 0 | 3 |
| <u>ARMC8</u>    | 1 | 0 | 0 | 1 | 0 | 0 | 0 | 0 | 0 | 1 | 3 |
| <u>ARMC8</u>    | 1 | 0 | 0 | 1 | 0 | 0 | 0 | 0 | 0 | 1 | 3 |
| <u>RNF19A</u>   | 0 | 1 | 0 | 1 | 0 | 0 | 0 | 0 | 0 | 1 | 3 |
| <u>RCHY1</u>    | 1 | 1 | 0 | 1 | 0 | 0 | 0 | 0 | 0 | 0 | 3 |
| <u>IFFO</u>     | 1 | 0 | 0 | 1 | 0 | 0 | 0 | 0 | 0 | 1 | 3 |
| <u>C1orf43</u>  | 1 | 0 | 0 | 1 | 0 | 0 | 0 | 0 | 0 | 1 | 3 |

|                  |   |   |   |   |   |   |   |   |   |   |   |
|------------------|---|---|---|---|---|---|---|---|---|---|---|
| <u>C1orf43</u>   | 1 | 0 | 0 | 1 | 0 | 0 | 0 | 0 | 0 | 1 | 3 |
| <u>THUMPD3</u>   | 1 | 0 | 0 | 1 | 0 | 0 | 0 | 0 | 0 | 1 | 3 |
| <u>GANC</u>      | 0 | 1 | 0 | 1 | 0 | 0 | 0 | 0 | 0 | 1 | 3 |
| <u>SFRS18</u>    | 0 | 1 | 0 | 1 | 0 | 0 | 0 | 0 | 0 | 1 | 3 |
| <u>SFRS18</u>    | 0 | 0 | 0 | 1 | 0 | 0 | 1 | 0 | 0 | 1 | 3 |
| <u>C2CD2</u>     | 1 | 0 | 0 | 1 | 0 | 0 | 0 | 0 | 0 | 1 | 3 |
| <u>LOC26010</u>  | 0 | 0 | 0 | 1 | 0 | 0 | 1 | 0 | 0 | 1 | 3 |
| <u>LOC26010</u>  | 0 | 1 | 0 | 1 | 0 | 0 | 0 | 0 | 0 | 1 | 3 |
| <u>PIP3-E</u>    | 1 | 0 | 0 | 1 | 0 | 0 | 0 | 0 | 0 | 1 | 3 |
| <u>PIP3-E</u>    | 1 | 0 | 0 | 1 | 0 | 0 | 0 | 0 | 0 | 1 | 3 |
| <u>GIGYF2</u>    | 0 | 0 | 0 | 1 | 0 | 0 | 1 | 0 | 0 | 1 | 3 |
| <u>SGEF</u>      | 0 | 1 | 0 | 1 | 0 | 0 | 1 | 0 | 0 | 0 | 3 |
| <u>WDR21A</u>    | 1 | 0 | 0 | 1 | 0 | 0 | 0 | 0 | 0 | 1 | 3 |
| <u>TTLL3</u>     | 0 | 0 | 0 | 1 | 0 | 0 | 1 | 0 | 0 | 1 | 3 |
| <u>LRRC32</u>    | 1 | 0 | 0 | 1 | 0 | 0 | 0 | 0 | 0 | 1 | 3 |
| <u>RGS22</u>     | 0 | 1 | 0 | 1 | 0 | 0 | 0 | 0 | 0 | 1 | 3 |
| <u>ARL5A</u>     | 1 | 0 | 0 | 1 | 0 | 0 | 0 | 0 | 0 | 1 | 3 |
| <u>FBXL5</u>     | 0 | 0 | 0 | 1 | 0 | 0 | 1 | 0 | 0 | 1 | 3 |
| <u>FBXO24</u>    | 1 | 0 | 0 | 1 | 0 | 0 | 1 | 0 | 0 | 0 | 3 |
| <u>CNNM3</u>     | 1 | 0 | 0 | 1 | 0 | 0 | 0 | 0 | 0 | 1 | 3 |
| <u>GCNT2</u>     | 1 | 0 | 0 | 1 | 0 | 0 | 0 | 0 | 0 | 1 | 3 |
| <u>CKAP2</u>     | 1 | 0 | 0 | 1 | 0 | 0 | 0 | 0 | 0 | 1 | 3 |
| <u>ABL2</u>      | 0 | 1 | 0 | 1 | 0 | 0 | 0 | 0 | 0 | 1 | 3 |
| <u>ABL2</u>      | 0 | 0 | 0 | 1 | 0 | 0 | 1 | 0 | 0 | 1 | 3 |
| <u>VPS41</u>     | 1 | 0 | 0 | 1 | 0 | 0 | 0 | 0 | 0 | 1 | 3 |
| <u>GK</u>        | 1 | 0 | 0 | 1 | 0 | 0 | 0 | 0 | 0 | 1 | 3 |
| <u>CACYBP</u>    | 1 | 0 | 0 | 1 | 0 | 0 | 0 | 0 | 0 | 1 | 3 |
| <u>ARFIP1</u>    | 1 | 0 | 0 | 1 | 0 | 0 | 0 | 0 | 0 | 1 | 3 |
| <u>BBS9</u>      | 1 | 0 | 0 | 1 | 0 | 0 | 0 | 0 | 0 | 1 | 3 |
| <u>BBS9</u>      | 1 | 0 | 0 | 1 | 0 | 0 | 0 | 0 | 0 | 1 | 3 |
| <u>PCDH11X</u>   | 1 | 0 | 0 | 1 | 0 | 0 | 0 | 0 | 0 | 1 | 3 |
| <u>CECR2</u>     | 0 | 0 | 0 | 1 | 0 | 0 | 1 | 0 | 0 | 1 | 3 |
| <u>PCLO</u>      | 0 | 1 | 0 | 1 | 0 | 0 | 0 | 0 | 0 | 1 | 3 |
| <u>GPM6A</u>     | 1 | 0 | 0 | 1 | 0 | 0 | 0 | 0 | 0 | 1 | 3 |
| <u>C14orf178</u> | 0 | 1 | 0 | 1 | 0 | 0 | 0 | 0 | 0 | 1 | 3 |
| <u>ANGPT2</u>    | 1 | 0 | 0 | 1 | 0 | 0 | 0 | 0 | 0 | 1 | 3 |
| <u>ANGPT2</u>    | 1 | 0 | 0 | 1 | 0 | 0 | 0 | 0 | 0 | 1 | 3 |
| <u>ZNF621</u>    | 1 | 1 | 0 | 1 | 0 | 0 | 0 | 0 | 0 | 0 | 3 |
| <u>ZNF621</u>    | 1 | 0 | 0 | 1 | 0 | 0 | 1 | 0 | 0 | 0 | 3 |
| <u>C3orf23</u>   | 1 | 0 | 0 | 1 | 0 | 0 | 0 | 0 | 0 | 1 | 3 |
| <u>RNF212</u>    | 1 | 1 | 0 | 1 | 0 | 0 | 0 | 0 | 0 | 0 | 3 |

|                 |   |   |   |   |   |   |   |   |   |   |   |
|-----------------|---|---|---|---|---|---|---|---|---|---|---|
| <u>RNF212</u>   | 1 | 1 | 0 | 1 | 0 | 0 | 0 | 0 | 0 | 0 | 3 |
| <u>ANK1</u>     | 1 | 0 | 0 | 1 | 0 | 0 | 0 | 0 | 0 | 1 | 3 |
| <u>ANK1</u>     | 1 | 0 | 0 | 1 | 0 | 0 | 0 | 0 | 0 | 1 | 3 |
| <u>ANK1</u>     | 1 | 0 | 0 | 1 | 0 | 0 | 0 | 0 | 0 | 1 | 3 |
| <u>ANK1</u>     | 1 | 0 | 0 | 1 | 0 | 0 | 0 | 0 | 0 | 1 | 3 |
| <u>MGC39900</u> | 0 | 1 | 0 | 1 | 0 | 0 | 0 | 0 | 0 | 1 | 3 |
| <u>GRB10</u>    | 1 | 0 | 0 | 1 | 0 | 0 | 0 | 0 | 0 | 1 | 3 |
| <u>GRB10</u>    | 1 | 0 | 0 | 1 | 0 | 0 | 0 | 0 | 0 | 1 | 3 |
| <u>GRIA2</u>    | 1 | 0 | 0 | 1 | 0 | 0 | 0 | 0 | 0 | 1 | 3 |
| <u>GRIA2</u>    | 1 | 0 | 0 | 1 | 0 | 0 | 0 | 0 | 0 | 1 | 3 |
| <u>IFT81</u>    | 0 | 0 | 1 | 1 | 0 | 0 | 1 | 0 | 0 | 0 | 3 |
| <u>GRIK3</u>    | 0 | 1 | 0 | 1 | 0 | 0 | 0 | 0 | 0 | 1 | 3 |
| <u>HIPK2</u>    | 0 | 1 | 0 | 1 | 0 | 0 | 0 | 0 | 0 | 1 | 3 |
| <u>GRIN2A</u>   | 1 | 1 | 0 | 1 | 0 | 0 | 0 | 0 | 0 | 0 | 3 |
| <u>NR3C1</u>    | 1 | 0 | 0 | 1 | 0 | 0 | 0 | 0 | 0 | 1 | 3 |
| <u>NR3C1</u>    | 1 | 0 | 0 | 1 | 0 | 0 | 0 | 0 | 0 | 1 | 3 |
| <u>NR3C1</u>    | 1 | 0 | 0 | 1 | 0 | 0 | 0 | 0 | 0 | 1 | 3 |
| <u>RNASEN</u>   | 1 | 0 | 0 | 1 | 0 | 0 | 0 | 0 | 0 | 1 | 3 |
| <u>TAGLN3</u>   | 1 | 1 | 0 | 1 | 0 | 0 | 0 | 0 | 0 | 0 | 3 |
| <u>TAGLN3</u>   | 1 | 0 | 0 | 1 | 0 | 0 | 1 | 0 | 0 | 0 | 3 |
| <u>RACGAP1</u>  | 1 | 0 | 0 | 1 | 0 | 0 | 0 | 0 | 1 | 0 | 3 |
| <u>RACGAP1</u>  | 1 | 1 | 0 | 1 | 0 | 0 | 0 | 0 | 0 | 0 | 3 |
| <u>GRHL1</u>    | 1 | 1 | 0 | 1 | 0 | 0 | 0 | 0 | 0 | 0 | 3 |
| <u>SLC25A24</u> | 1 | 0 | 0 | 1 | 0 | 0 | 0 | 0 | 0 | 1 | 3 |
| <u>SH3KBP1</u>  | 1 | 1 | 0 | 1 | 0 | 0 | 0 | 0 | 0 | 0 | 3 |
| <u>HBD</u>      | 0 | 1 | 0 | 1 | 0 | 0 | 1 | 0 | 0 | 0 | 3 |
| <u>EMR2</u>     | 1 | 0 | 0 | 1 | 0 | 0 | 0 | 0 | 0 | 1 | 3 |
| <u>EMR2</u>     | 1 | 0 | 0 | 1 | 0 | 0 | 0 | 0 | 0 | 1 | 3 |
| <u>EMR2</u>     | 1 | 0 | 0 | 1 | 0 | 0 | 0 | 0 | 0 | 1 | 3 |
| <u>ANXA11</u>   | 1 | 0 | 0 | 1 | 0 | 0 | 0 | 0 | 0 | 1 | 3 |
| <u>HMBS</u>     | 1 | 0 | 0 | 1 | 0 | 0 | 0 | 0 | 0 | 1 | 3 |
| <u>HMGB2</u>    | 1 | 0 | 0 | 1 | 0 | 0 | 0 | 0 | 0 | 1 | 3 |
| <u>EIF4E3</u>   | 1 | 1 | 0 | 1 | 0 | 0 | 0 | 0 | 0 | 0 | 3 |
| <u>HNRNPC</u>   | 1 | 0 | 0 | 1 | 0 | 0 | 0 | 0 | 0 | 1 | 3 |
| <u>HNRNPC</u>   | 0 | 0 | 0 | 1 | 0 | 0 | 1 | 0 | 0 | 1 | 3 |
| <u>APBA1</u>    | 0 | 1 | 0 | 1 | 0 | 0 | 1 | 0 | 0 | 0 | 3 |
| <u>HOXA3</u>    | 1 | 0 | 0 | 1 | 0 | 0 | 0 | 0 | 0 | 1 | 3 |
| <u>HOXA3</u>    | 0 | 1 | 0 | 1 | 0 | 0 | 0 | 0 | 0 | 1 | 3 |
| <u>HRH1</u>     | 1 | 0 | 0 | 1 | 0 | 0 | 0 | 0 | 0 | 1 | 3 |
| <u>HRH1</u>     | 1 | 0 | 0 | 1 | 0 | 0 | 0 | 0 | 0 | 1 | 3 |
| <u>PRMT2</u>    | 0 | 1 | 0 | 1 | 0 | 0 | 0 | 0 | 0 | 1 | 3 |

|                  |   |   |   |   |   |   |   |   |   |   |   |
|------------------|---|---|---|---|---|---|---|---|---|---|---|
| <u>PRMT2</u>     | 0 | 0 | 0 | 1 | 0 | 0 | 1 | 0 | 0 | 1 | 3 |
| <u>HSD11B1</u>   | 1 | 0 | 0 | 1 | 0 | 0 | 0 | 0 | 0 | 1 | 3 |
| <u>BIRC5</u>     | 1 | 0 | 0 | 1 | 0 | 0 | 0 | 0 | 0 | 1 | 3 |
| <u>CHSY3</u>     | 0 | 1 | 0 | 1 | 0 | 0 | 1 | 0 | 0 | 0 | 3 |
| <u>7A5</u>       | 0 | 1 | 0 | 1 | 0 | 0 | 0 | 0 | 0 | 1 | 3 |
| <u>IGF1</u>      | 1 | 0 | 0 | 1 | 0 | 0 | 0 | 0 | 0 | 1 | 3 |
| <u>IGFBP3</u>    | 1 | 1 | 0 | 1 | 0 | 0 | 0 | 0 | 0 | 0 | 3 |
| <u>IGFBP3</u>    | 1 | 0 | 0 | 1 | 0 | 0 | 1 | 0 | 0 | 0 | 3 |
| <u>IGLL1</u>     | 1 | 1 | 0 | 1 | 0 | 0 | 0 | 0 | 0 | 0 | 3 |
| <u>FAS</u>       | 1 | 0 | 0 | 1 | 0 | 0 | 0 | 0 | 0 | 1 | 3 |
| <u>FAS</u>       | 0 | 1 | 0 | 1 | 0 | 0 | 0 | 0 | 0 | 1 | 3 |
| <u>IL6ST</u>     | 1 | 1 | 0 | 1 | 0 | 0 | 0 | 0 | 0 | 0 | 3 |
| <u>IL16</u>      | 1 | 0 | 0 | 1 | 0 | 0 | 0 | 0 | 0 | 1 | 3 |
| <u>INCENP</u>    | 1 | 0 | 0 | 1 | 0 | 0 | 0 | 0 | 0 | 1 | 3 |
| <u>ING1</u>      | 1 | 1 | 0 | 1 | 0 | 0 | 0 | 0 | 0 | 0 | 3 |
| <u>INSR</u>      | 1 | 0 | 0 | 1 | 0 | 0 | 0 | 0 | 0 | 1 | 3 |
| <u>IRF5</u>      | 1 | 0 | 0 | 1 | 0 | 0 | 0 | 0 | 0 | 1 | 3 |
| <u>IRF5</u>      | 1 | 0 | 0 | 1 | 0 | 0 | 0 | 0 | 0 | 1 | 3 |
| <u>IRF5</u>      | 0 | 1 | 0 | 1 | 0 | 0 | 0 | 0 | 0 | 1 | 3 |
| <u>IRF5</u>      | 1 | 0 | 0 | 1 | 0 | 0 | 0 | 0 | 0 | 1 | 3 |
| <u>IRS1</u>      | 0 | 1 | 0 | 1 | 0 | 0 | 1 | 0 | 0 | 0 | 3 |
| <u>IVD</u>       | 0 | 1 | 0 | 1 | 0 | 0 | 0 | 0 | 0 | 1 | 3 |
| <u>KCNA3</u>     | 0 | 1 | 0 | 1 | 0 | 0 | 1 | 0 | 0 | 0 | 3 |
| <u>KCNA6</u>     | 0 | 1 | 0 | 1 | 0 | 0 | 1 | 0 | 0 | 0 | 3 |
| <u>KCNC2</u>     | 1 | 0 | 0 | 1 | 0 | 0 | 0 | 0 | 0 | 1 | 3 |
| <u>PTAR1</u>     | 0 | 1 | 0 | 1 | 0 | 0 | 1 | 0 | 0 | 0 | 3 |
| <u>KCNJ1</u>     | 1 | 0 | 0 | 1 | 0 | 0 | 0 | 0 | 0 | 1 | 3 |
| <u>KCNJ1</u>     | 1 | 0 | 0 | 1 | 0 | 0 | 0 | 0 | 0 | 1 | 3 |
| <u>KCNJ1</u>     | 1 | 0 | 0 | 1 | 0 | 0 | 0 | 0 | 0 | 1 | 3 |
| <u>KCNMA1</u>    | 1 | 0 | 0 | 1 | 0 | 0 | 0 | 0 | 0 | 1 | 3 |
| <u>KIR2DL1</u>   | 0 | 0 | 0 | 1 | 0 | 0 | 1 | 0 | 0 | 1 | 3 |
| <u>CC2D2B</u>    | 1 | 0 | 0 | 1 | 0 | 0 | 1 | 0 | 0 | 0 | 3 |
| <u>NHLRC3</u>    | 1 | 0 | 0 | 1 | 0 | 0 | 0 | 0 | 0 | 1 | 3 |
| <u>LOC388503</u> | 0 | 0 | 0 | 1 | 0 | 0 | 1 | 0 | 0 | 1 | 3 |
| <u>LAMP2</u>     | 0 | 1 | 1 | 1 | 0 | 0 | 0 | 0 | 0 | 0 | 3 |
| <u>ARHGAP5</u>   | 1 | 0 | 0 | 1 | 0 | 0 | 0 | 0 | 0 | 1 | 3 |
| <u>ARHGAP6</u>   | 1 | 1 | 0 | 1 | 0 | 0 | 0 | 0 | 0 | 0 | 3 |
| <u>LIG4</u>      | 1 | 0 | 0 | 1 | 0 | 0 | 0 | 0 | 0 | 1 | 3 |
| <u>LIG4</u>      | 0 | 1 | 0 | 1 | 0 | 0 | 0 | 0 | 0 | 1 | 3 |
| <u>ABLIM1</u>    | 1 | 0 | 0 | 1 | 0 | 0 | 0 | 0 | 0 | 1 | 3 |
| <u>ABLIM1</u>    | 1 | 0 | 0 | 1 | 0 | 0 | 0 | 0 | 0 | 1 | 3 |

|                 |   |   |   |   |   |   |   |   |   |   |   |
|-----------------|---|---|---|---|---|---|---|---|---|---|---|
| <u>LIMK2</u>    | 1 | 1 | 0 | 1 | 0 | 0 | 0 | 0 | 0 | 0 | 3 |
| <u>LIMK2</u>    | 1 | 0 | 0 | 1 | 0 | 0 | 1 | 0 | 0 | 0 | 3 |
| <u>FAM102A</u>  | 1 | 0 | 0 | 1 | 0 | 0 | 0 | 0 | 0 | 1 | 3 |
| <u>FLJ42957</u> | 0 | 0 | 0 | 1 | 0 | 0 | 1 | 0 | 0 | 1 | 3 |
| <u>FLJ13137</u> | 0 | 0 | 0 | 1 | 0 | 0 | 1 | 0 | 0 | 1 | 3 |
| <u>LMX1B</u>    | 0 | 1 | 0 | 1 | 0 | 0 | 0 | 0 | 0 | 1 | 3 |
| <u>C8orf59</u>  | 0 | 1 | 0 | 1 | 0 | 0 | 0 | 0 | 0 | 1 | 3 |
| <u>SMAD2</u>    | 1 | 0 | 0 | 1 | 0 | 0 | 0 | 0 | 0 | 1 | 3 |
| <u>ARRB2</u>    | 1 | 0 | 0 | 1 | 0 | 0 | 0 | 0 | 0 | 1 | 3 |
| <u>MAGEA4</u>   | 1 | 0 | 0 | 1 | 0 | 0 | 0 | 0 | 0 | 1 | 3 |
| <u>MAGEA4</u>   | 1 | 0 | 0 | 1 | 0 | 0 | 0 | 0 | 0 | 1 | 3 |
| <u>MAGEB1</u>   | 1 | 1 | 0 | 1 | 0 | 0 | 0 | 0 | 0 | 0 | 3 |
| <u>MAP2</u>     | 1 | 0 | 0 | 1 | 0 | 0 | 0 | 0 | 0 | 1 | 3 |
| <u>MAP2</u>     | 1 | 0 | 0 | 1 | 0 | 0 | 0 | 0 | 0 | 1 | 3 |
| <u>MAPT</u>     | 1 | 0 | 0 | 1 | 0 | 0 | 0 | 0 | 0 | 1 | 3 |
| <u>MAPT</u>     | 1 | 0 | 0 | 1 | 0 | 0 | 0 | 0 | 0 | 1 | 3 |
| <u>MAPT</u>     | 1 | 0 | 0 | 1 | 0 | 0 | 0 | 0 | 0 | 1 | 3 |
| <u>MAPT</u>     | 1 | 0 | 0 | 1 | 0 | 0 | 0 | 0 | 0 | 1 | 3 |
| <u>MAPT</u>     | 1 | 0 | 0 | 1 | 0 | 0 | 0 | 0 | 0 | 1 | 3 |
| <u>MAPT</u>     | 1 | 0 | 0 | 1 | 0 | 0 | 0 | 0 | 0 | 1 | 3 |
| <u>MAPT</u>     | 1 | 0 | 0 | 1 | 0 | 0 | 0 | 0 | 0 | 1 | 3 |
| <u>MATN2</u>    | 0 | 1 | 0 | 1 | 0 | 0 | 1 | 0 | 0 | 0 | 3 |
| <u>MBNL1</u>    | 1 | 0 | 0 | 1 | 0 | 0 | 0 | 0 | 0 | 1 | 3 |
| <u>MBNL1</u>    | 1 | 0 | 0 | 1 | 0 | 0 | 0 | 0 | 0 | 1 | 3 |
| <u>MBNL1</u>    | 1 | 0 | 0 | 1 | 0 | 0 | 0 | 0 | 0 | 1 | 3 |
| <u>MBNL1</u>    | 1 | 0 | 0 | 1 | 0 | 0 | 0 | 0 | 0 | 1 | 3 |
| <u>MBNL1</u>    | 1 | 0 | 0 | 1 | 0 | 0 | 0 | 0 | 0 | 1 | 3 |
| <u>MBNL1</u>    | 1 | 0 | 0 | 1 | 0 | 0 | 0 | 0 | 0 | 1 | 3 |
| <u>MBP</u>      | 1 | 0 | 0 | 1 | 0 | 0 | 0 | 0 | 0 | 1 | 3 |
| <u>MBP</u>      | 1 | 0 | 0 | 1 | 0 | 0 | 0 | 0 | 0 | 1 | 3 |
| <u>MBP</u>      | 1 | 0 | 0 | 1 | 0 | 0 | 0 | 0 | 0 | 1 | 3 |
| <u>MBP</u>      | 1 | 0 | 0 | 1 | 0 | 0 | 0 | 0 | 0 | 1 | 3 |
| <u>MBP</u>      | 1 | 0 | 0 | 1 | 0 | 0 | 0 | 0 | 0 | 1 | 3 |
| <u>CD46</u>     | 1 | 0 | 0 | 1 | 0 | 0 | 0 | 0 | 0 | 1 | 3 |
| <u>CD46</u>     | 1 | 0 | 0 | 1 | 0 | 0 | 0 | 0 | 0 | 1 | 3 |
| <u>CD46</u>     | 1 | 0 | 0 | 1 | 0 | 0 | 0 | 0 | 0 | 1 | 3 |
| <u>CD46</u>     | 1 | 0 | 0 | 1 | 0 | 0 | 0 | 0 | 0 | 1 | 3 |
| <u>CD46</u>     | 1 | 0 | 0 | 1 | 0 | 0 | 0 | 0 | 0 | 1 | 3 |
| <u>CD46</u>     | 1 | 0 | 0 | 1 | 0 | 0 | 0 | 0 | 0 | 1 | 3 |
| <u>CD46</u>     | 0 | 1 | 0 | 1 | 0 | 0 | 0 | 0 | 0 | 1 | 3 |
| <u>CD46</u>     | 1 | 0 | 0 | 1 | 0 | 0 | 0 | 0 | 0 | 1 | 3 |
| <u>MDM4</u>     | 0 | 1 | 0 | 1 | 0 | 0 | 1 | 0 | 0 | 0 | 3 |
| <u>MEST</u>     | 1 | 0 | 0 | 1 | 0 | 0 | 0 | 0 | 0 | 1 | 3 |
| <u>MEST</u>     | 1 | 0 | 0 | 1 | 0 | 0 | 0 | 0 | 0 | 1 | 3 |
| <u>MFAP3</u>    | 0 | 1 | 0 | 1 | 0 | 0 | 1 | 0 | 0 | 0 | 3 |
| <u>MGAT3</u>    | 0 | 1 | 0 | 1 | 0 | 0 | 0 | 0 | 0 | 1 | 3 |

|                |   |   |   |   |   |   |   |   |   |   |   |
|----------------|---|---|---|---|---|---|---|---|---|---|---|
| <u>KITLG</u>   | 1 | 0 | 0 | 1 | 0 | 0 | 0 | 0 | 0 | 1 | 3 |
| <u>ATXN3</u>   | 1 | 0 | 0 | 1 | 0 | 0 | 0 | 0 | 0 | 1 | 3 |
| <u>ATXN3</u>   | 1 | 0 | 0 | 1 | 0 | 0 | 0 | 0 | 0 | 1 | 3 |
| <u>ATXN3</u>   | 1 | 0 | 0 | 1 | 0 | 0 | 0 | 0 | 0 | 1 | 3 |
| <u>MLF1</u>    | 1 | 0 | 0 | 1 | 0 | 0 | 0 | 0 | 0 | 1 | 3 |
| <u>MLF1</u>    | 1 | 0 | 0 | 1 | 0 | 0 | 0 | 0 | 0 | 1 | 3 |
| <u>MLLT4</u>   | 0 | 1 | 0 | 1 | 0 | 0 | 1 | 0 | 0 | 0 | 3 |
| <u>MME</u>     | 0 | 1 | 0 | 1 | 0 | 0 | 0 | 0 | 0 | 1 | 3 |
| <u>MOCS2</u>   | 1 | 1 | 0 | 1 | 0 | 0 | 0 | 0 | 0 | 0 | 3 |
| <u>MOG</u>     | 1 | 0 | 0 | 1 | 0 | 0 | 0 | 0 | 0 | 1 | 3 |
| <u>MOG</u>     | 1 | 0 | 0 | 1 | 0 | 0 | 0 | 0 | 0 | 1 | 3 |
| <u>MOG</u>     | 1 | 0 | 0 | 1 | 0 | 0 | 0 | 0 | 0 | 1 | 3 |
| <u>MOG</u>     | 0 | 1 | 0 | 1 | 0 | 0 | 0 | 0 | 0 | 1 | 3 |
| <u>MTHFD2L</u> | 0 | 0 | 0 | 1 | 0 | 0 | 1 | 0 | 0 | 1 | 3 |
| <u>MSR1</u>    | 1 | 0 | 0 | 1 | 0 | 0 | 0 | 0 | 0 | 1 | 3 |
| <u>MYBPC1</u>  | 0 | 0 | 0 | 1 | 1 | 1 | 0 | 0 | 0 | 0 | 3 |
| <u>ATF1</u>    | 0 | 1 | 0 | 1 | 0 | 0 | 1 | 0 | 0 | 0 | 3 |
| <u>NBN</u>     | 0 | 0 | 0 | 1 | 0 | 0 | 1 | 0 | 0 | 1 | 3 |
| <u>RERE</u>    | 1 | 0 | 0 | 1 | 0 | 0 | 0 | 0 | 0 | 1 | 3 |
| <u>SEPT2</u>   | 1 | 0 | 0 | 1 | 0 | 0 | 0 | 0 | 0 | 1 | 3 |
| <u>SEPT2</u>   | 1 | 0 | 0 | 1 | 0 | 0 | 0 | 0 | 0 | 1 | 3 |
| <u>NELL2</u>   | 1 | 0 | 0 | 1 | 0 | 0 | 1 | 0 | 0 | 0 | 3 |
| <u>NF1</u>     | 1 | 0 | 0 | 1 | 0 | 0 | 0 | 0 | 0 | 1 | 3 |
| <u>NPM1</u>    | 0 | 0 | 0 | 1 | 1 | 1 | 0 | 0 | 0 | 0 | 3 |
| <u>NRCAM</u>   | 1 | 0 | 0 | 1 | 0 | 0 | 0 | 0 | 0 | 1 | 3 |
| <u>NRF1</u>    | 1 | 0 | 0 | 1 | 0 | 0 | 0 | 0 | 0 | 1 | 3 |
| <u>ZNF295</u>  | 1 | 0 | 0 | 1 | 0 | 0 | 0 | 0 | 0 | 1 | 3 |
| <u>SPRN</u>    | 0 | 1 | 0 | 1 | 0 | 0 | 1 | 0 | 0 | 0 | 3 |
| <u>MINK1</u>   | 1 | 0 | 0 | 1 | 0 | 0 | 0 | 0 | 0 | 1 | 3 |
| <u>MINK1</u>   | 0 | 0 | 0 | 1 | 1 | 0 | 0 | 0 | 0 | 1 | 3 |
| <u>Dec-01</u>  | 0 | 1 | 0 | 1 | 0 | 0 | 1 | 0 | 0 | 0 | 3 |
| <u>ITSN2</u>   | 1 | 0 | 0 | 1 | 0 | 0 | 0 | 0 | 0 | 1 | 3 |
| <u>TMEM16G</u> | 0 | 1 | 0 | 1 | 0 | 0 | 1 | 0 | 0 | 0 | 3 |
| <u>ARHGEF3</u> | 1 | 0 | 0 | 1 | 0 | 0 | 0 | 0 | 0 | 1 | 3 |
| <u>PARK2</u>   | 1 | 0 | 0 | 1 | 0 | 0 | 0 | 0 | 0 | 1 | 3 |
| <u>PARK2</u>   | 1 | 0 | 0 | 1 | 0 | 0 | 0 | 0 | 0 | 1 | 3 |
| <u>PARN</u>    | 1 | 0 | 0 | 1 | 0 | 0 | 0 | 0 | 0 | 1 | 3 |
| <u>PAX6</u>    | 0 | 0 | 1 | 1 | 0 | 0 | 1 | 0 | 0 | 0 | 3 |
| <u>SPOCK3</u>  | 1 | 0 | 0 | 1 | 0 | 0 | 0 | 0 | 0 | 1 | 3 |
| <u>PDE11A</u>  | 1 | 0 | 0 | 1 | 0 | 0 | 0 | 0 | 0 | 1 | 3 |
| <u>PDE11A</u>  | 1 | 0 | 0 | 1 | 0 | 0 | 0 | 0 | 0 | 1 | 3 |



|                 |   |   |   |   |   |   |   |   |   |   |   |
|-----------------|---|---|---|---|---|---|---|---|---|---|---|
| <u>PCDH7</u>    | 0 | 0 | 0 | 1 | 0 | 0 | 1 | 0 | 0 | 1 | 3 |
| <u>ACOX1</u>    | 1 | 0 | 0 | 1 | 0 | 0 | 0 | 0 | 0 | 1 | 3 |
| <u>SLC35C2</u>  | 1 | 0 | 0 | 1 | 0 | 0 | 0 | 0 | 0 | 1 | 3 |
| <u>KLHL5</u>    | 1 | 0 | 0 | 1 | 0 | 0 | 0 | 0 | 0 | 1 | 3 |
| <u>PHF20L1</u>  | 1 | 0 | 0 | 1 | 0 | 0 | 0 | 0 | 0 | 1 | 3 |
| <u>CCDC41</u>   | 0 | 0 | 0 | 1 | 0 | 0 | 1 | 0 | 0 | 1 | 3 |
| <u>IRAK4</u>    | 0 | 1 | 0 | 1 | 0 | 0 | 0 | 0 | 0 | 1 | 3 |
| <u>ZNF639</u>   | 0 | 1 | 0 | 1 | 0 | 0 | 1 | 0 | 0 | 0 | 3 |
| <u>VRK3</u>     | 1 | 0 | 0 | 1 | 0 | 0 | 0 | 0 | 0 | 1 | 3 |
| <u>C4orf18</u>  | 1 | 1 | 0 | 1 | 0 | 0 | 0 | 0 | 0 | 0 | 3 |
| <u>C4orf18</u>  | 1 | 0 | 0 | 1 | 0 | 0 | 1 | 0 | 0 | 0 | 3 |
| <u>PLAC8</u>    | 1 | 0 | 0 | 1 | 0 | 0 | 0 | 0 | 0 | 1 | 3 |
| <u>SPG21</u>    | 1 | 0 | 0 | 1 | 0 | 0 | 0 | 0 | 0 | 1 | 3 |
| <u>SPG21</u>    | 1 | 0 | 0 | 1 | 0 | 0 | 0 | 0 | 0 | 1 | 3 |
| <u>WNT16</u>    | 1 | 0 | 0 | 1 | 0 | 0 | 0 | 0 | 0 | 1 | 3 |
| <u>PRKAG2</u>   | 1 | 0 | 0 | 1 | 0 | 0 | 0 | 0 | 0 | 1 | 3 |
| <u>PRKAG2</u>   | 1 | 0 | 0 | 1 | 0 | 0 | 0 | 0 | 0 | 1 | 3 |
| <u>ARMCX3</u>   | 0 | 1 | 0 | 1 | 0 | 0 | 0 | 0 | 0 | 1 | 3 |
| <u>AZIN1</u>    | 1 | 0 | 0 | 1 | 0 | 0 | 1 | 0 | 0 | 0 | 3 |
| <u>TRIM33</u>   | 1 | 0 | 0 | 1 | 0 | 0 | 0 | 0 | 0 | 1 | 3 |
| <u>VPS24</u>    | 1 | 0 | 0 | 1 | 0 | 0 | 0 | 0 | 0 | 1 | 3 |
| <u>PDPK1</u>    | 1 | 0 | 0 | 1 | 0 | 0 | 0 | 0 | 0 | 1 | 3 |
| <u>PEG3</u>     | 1 | 0 | 0 | 1 | 0 | 0 | 1 | 0 | 0 | 0 | 3 |
| <u>ACPI</u>     | 0 | 1 | 0 | 1 | 0 | 0 | 0 | 0 | 0 | 1 | 3 |
| <u>PHKA1</u>    | 1 | 0 | 0 | 1 | 0 | 0 | 0 | 0 | 0 | 1 | 3 |
| <u>SERPINI1</u> | 1 | 1 | 0 | 1 | 0 | 0 | 0 | 0 | 0 | 0 | 3 |
| <u>SERPINI1</u> | 1 | 0 | 0 | 1 | 0 | 0 | 1 | 0 | 0 | 0 | 3 |
| <u>PIGA</u>     | 1 | 0 | 0 | 1 | 0 | 0 | 0 | 0 | 0 | 1 | 3 |
| <u>PIP4K2A</u>  | 0 | 1 | 0 | 1 | 0 | 0 | 1 | 0 | 0 | 0 | 3 |
| <u>PLAG1</u>    | 1 | 0 | 0 | 1 | 0 | 0 | 0 | 0 | 0 | 1 | 3 |
| <u>PANK1</u>    | 1 | 0 | 0 | 1 | 0 | 0 | 0 | 0 | 0 | 1 | 3 |
| <u>PANK1</u>    | 1 | 0 | 0 | 1 | 0 | 0 | 0 | 0 | 0 | 1 | 3 |
| <u>PLD1</u>     | 1 | 0 | 0 | 1 | 0 | 0 | 0 | 0 | 0 | 1 | 3 |
| <u>PLP1</u>     | 1 | 0 | 0 | 1 | 1 | 0 | 0 | 0 | 0 | 0 | 3 |
| <u>PLRG1</u>    | 1 | 1 | 0 | 1 | 0 | 0 | 0 | 0 | 0 | 0 | 3 |
| <u>ATP7B</u>    | 1 | 0 | 0 | 1 | 0 | 0 | 0 | 0 | 0 | 1 | 3 |
| <u>PNN</u>      | 0 | 1 | 0 | 1 | 0 | 0 | 1 | 0 | 0 | 0 | 3 |
| <u>POLH</u>     | 0 | 1 | 0 | 1 | 0 | 0 | 0 | 0 | 0 | 1 | 3 |
| <u>GDAP1</u>    | 1 | 0 | 0 | 1 | 0 | 0 | 0 | 0 | 0 | 1 | 3 |
| <u>RBM27</u>    | 0 | 1 | 0 | 1 | 0 | 0 | 0 | 0 | 0 | 1 | 3 |
| <u>OTUD4</u>    | 0 | 0 | 0 | 1 | 1 | 0 | 0 | 0 | 0 | 1 | 3 |

|                   |   |   |   |   |   |   |   |   |   |   |   |
|-------------------|---|---|---|---|---|---|---|---|---|---|---|
| <u>C17orf59</u>   | 0 | 1 | 0 | 1 | 0 | 0 | 1 | 0 | 0 | 0 | 3 |
| <u>CNNM2</u>      | 1 | 0 | 0 | 1 | 0 | 0 | 0 | 0 | 0 | 1 | 3 |
| <u>RBM35A</u>     | 1 | 0 | 0 | 1 | 0 | 0 | 0 | 0 | 0 | 1 | 3 |
| <u>RBM35A</u>     | 1 | 0 | 0 | 1 | 0 | 0 | 0 | 0 | 0 | 1 | 3 |
| <u>RBM35A</u>     | 0 | 1 | 0 | 1 | 0 | 0 | 0 | 0 | 0 | 1 | 3 |
| <u>CTF8</u>       | 1 | 0 | 0 | 1 | 0 | 0 | 1 | 0 | 0 | 0 | 3 |
| <u>OCIAD1</u>     | 1 | 0 | 0 | 1 | 0 | 0 | 0 | 0 | 0 | 1 | 3 |
| <u>OCIAD1</u>     | 1 | 0 | 0 | 1 | 0 | 0 | 0 | 0 | 0 | 1 | 3 |
| <u>LPCAT2</u>     | 0 | 1 | 0 | 1 | 0 | 0 | 0 | 0 | 0 | 1 | 3 |
| <u>PIGX</u>       | 0 | 1 | 0 | 1 | 0 | 0 | 1 | 0 | 0 | 0 | 3 |
| <u>ACPP</u>       | 1 | 0 | 0 | 1 | 0 | 0 | 1 | 0 | 0 | 0 | 3 |
| <u>BANK1</u>      | 1 | 0 | 0 | 1 | 0 | 0 | 0 | 0 | 0 | 1 | 3 |
| <u>BANK1</u>      | 1 | 0 | 0 | 1 | 0 | 0 | 0 | 0 | 0 | 1 | 3 |
| <u>FAM70A</u>     | 1 | 0 | 0 | 1 | 0 | 0 | 0 | 0 | 0 | 1 | 3 |
| <u>FAM70A</u>     | 1 | 0 | 0 | 1 | 0 | 0 | 0 | 0 | 0 | 1 | 3 |
| <u>ATG16L1</u>    | 1 | 0 | 0 | 1 | 0 | 0 | 0 | 0 | 0 | 1 | 3 |
| <u>C9orf40</u>    | 0 | 1 | 0 | 1 | 0 | 0 | 1 | 0 | 0 | 0 | 3 |
| <u>FLJ10213</u>   | 0 | 1 | 0 | 1 | 0 | 0 | 1 | 0 | 0 | 0 | 3 |
| <u>RALGPS2</u>    | 1 | 1 | 0 | 1 | 0 | 0 | 0 | 0 | 0 | 0 | 3 |
| <u>LRRC8D</u>     | 1 | 0 | 0 | 1 | 0 | 0 | 0 | 0 | 0 | 1 | 3 |
| <u>DALRD3</u>     | 1 | 1 | 0 | 1 | 0 | 0 | 0 | 0 | 0 | 0 | 3 |
| <u>PBRM1</u>      | 1 | 0 | 0 | 1 | 0 | 0 | 0 | 0 | 0 | 1 | 3 |
| <u>PPP2R3A</u>    | 1 | 0 | 0 | 1 | 0 | 0 | 0 | 0 | 0 | 1 | 3 |
| <u>IMP3</u>       | 0 | 1 | 0 | 1 | 0 | 0 | 1 | 0 | 0 | 0 | 3 |
| <u>UBE2W</u>      | 1 | 0 | 0 | 1 | 0 | 0 | 0 | 0 | 0 | 1 | 3 |
| <u>MCM10</u>      | 1 | 0 | 0 | 1 | 0 | 0 | 0 | 0 | 0 | 1 | 3 |
| <u>DNAJA4</u>     | 1 | 0 | 0 | 1 | 0 | 0 | 0 | 0 | 0 | 1 | 3 |
| <u>DNAJA4</u>     | 1 | 0 | 0 | 1 | 0 | 0 | 0 | 0 | 0 | 1 | 3 |
| <u>SLC35E3</u>    | 0 | 1 | 0 | 1 | 0 | 0 | 1 | 0 | 0 | 0 | 3 |
| <u>RBM38</u>      | 1 | 1 | 0 | 1 | 0 | 0 | 0 | 0 | 0 | 0 | 3 |
| <u>BMP2K</u>      | 1 | 0 | 0 | 1 | 0 | 0 | 0 | 0 | 0 | 1 | 3 |
| <u>ZNF673</u>     | 1 | 0 | 0 | 1 | 0 | 0 | 0 | 0 | 0 | 1 | 3 |
| <u>ZNF673</u>     | 1 | 0 | 0 | 1 | 0 | 0 | 0 | 0 | 0 | 1 | 3 |
| <u>KIAA1310</u>   | 1 | 1 | 0 | 1 | 0 | 0 | 0 | 0 | 0 | 0 | 3 |
| <u>KIAA1310</u>   | 1 | 0 | 0 | 1 | 0 | 0 | 1 | 0 | 0 | 0 | 3 |
| <u>C17orf63</u>   | 0 | 1 | 0 | 1 | 0 | 0 | 0 | 0 | 0 | 1 | 3 |
| <u>C17orf63</u>   | 0 | 0 | 0 | 1 | 0 | 0 | 1 | 0 | 0 | 1 | 3 |
| <u>ZNF83</u>      | 1 | 0 | 0 | 1 | 0 | 0 | 0 | 0 | 0 | 1 | 3 |
| <u>CSGALNACT1</u> | 1 | 0 | 0 | 1 | 0 | 0 | 0 | 0 | 0 | 1 | 3 |
| <u>SCN3B</u>      | 1 | 0 | 0 | 1 | 0 | 0 | 0 | 0 | 0 | 1 | 3 |
| <u>TRERF1</u>     | 1 | 1 | 0 | 1 | 0 | 0 | 0 | 0 | 0 | 0 | 3 |

|                 |   |   |   |   |   |   |   |   |   |   |   |
|-----------------|---|---|---|---|---|---|---|---|---|---|---|
| <u>BDP1</u>     | 1 | 1 | 0 | 1 | 0 | 0 | 0 | 0 | 0 | 0 | 3 |
| <u>C3orf10</u>  | 0 | 1 | 0 | 1 | 0 | 0 | 1 | 0 | 0 | 0 | 3 |
| <u>PRKG1</u>    | 1 | 0 | 0 | 1 | 0 | 0 | 0 | 0 | 0 | 1 | 3 |
| <u>C20orf24</u> | 1 | 1 | 0 | 1 | 0 | 0 | 0 | 0 | 0 | 0 | 3 |
| <u>FAM54B</u>   | 1 | 0 | 0 | 1 | 0 | 0 | 0 | 0 | 0 | 1 | 3 |
| <u>FAM54B</u>   | 1 | 0 | 0 | 1 | 0 | 0 | 0 | 0 | 0 | 1 | 3 |
| <u>LMOD3</u>    | 0 | 1 | 0 | 1 | 0 | 0 | 1 | 0 | 0 | 0 | 3 |
| <u>LRRC8A</u>   | 1 | 0 | 0 | 1 | 0 | 0 | 0 | 0 | 1 | 0 | 3 |
| <u>LRRC8A</u>   | 1 | 1 | 0 | 1 | 0 | 0 | 0 | 0 | 0 | 0 | 3 |
| <u>PSG2</u>     | 0 | 1 | 0 | 1 | 0 | 0 | 1 | 0 | 0 | 0 | 3 |
| <u>PSG5</u>     | 0 | 1 | 0 | 1 | 0 | 0 | 0 | 0 | 0 | 1 | 3 |
| <u>PSG11</u>    | 0 | 1 | 0 | 1 | 0 | 0 | 0 | 0 | 0 | 1 | 3 |
| <u>AGPAT3</u>   | 1 | 0 | 0 | 1 | 0 | 0 | 0 | 0 | 0 | 1 | 3 |
| <u>ANKS1B</u>   | 1 | 0 | 0 | 1 | 1 | 0 | 0 | 0 | 0 | 0 | 3 |
| <u>C1orf119</u> | 0 | 1 | 0 | 1 | 0 | 0 | 0 | 0 | 0 | 1 | 3 |
| <u>SPIRE1</u>   | 1 | 0 | 0 | 1 | 0 | 0 | 0 | 0 | 0 | 1 | 3 |
| <u>SMARCAD1</u> | 1 | 0 | 0 | 1 | 0 | 0 | 0 | 0 | 0 | 1 | 3 |
| <u>SMARCAD1</u> | 1 | 0 | 0 | 1 | 0 | 0 | 0 | 0 | 0 | 1 | 3 |
| <u>PRDM10</u>   | 1 | 0 | 0 | 1 | 1 | 0 | 0 | 0 | 0 | 0 | 3 |
| <u>PRDM10</u>   | 1 | 0 | 0 | 1 | 1 | 0 | 0 | 0 | 0 | 0 | 3 |
| <u>PRDM10</u>   | 1 | 0 | 0 | 1 | 1 | 0 | 0 | 0 | 0 | 0 | 3 |
| <u>BAAT</u>     | 0 | 0 | 0 | 1 | 0 | 0 | 1 | 0 | 0 | 1 | 3 |
| <u>BACH1</u>    | 1 | 1 | 0 | 1 | 0 | 0 | 0 | 0 | 0 | 0 | 3 |
| <u>BACH1</u>    | 1 | 0 | 0 | 1 | 0 | 0 | 1 | 0 | 0 | 0 | 3 |
| <u>LYRM1</u>    | 1 | 0 | 0 | 1 | 0 | 0 | 0 | 0 | 0 | 1 | 3 |
| <u>C6orf162</u> | 1 | 0 | 0 | 1 | 0 | 0 | 1 | 0 | 0 | 0 | 3 |
| <u>C6orf162</u> | 1 | 1 | 0 | 1 | 0 | 0 | 0 | 0 | 0 | 0 | 3 |
| <u>SMURF1</u>   | 1 | 0 | 0 | 1 | 0 | 0 | 1 | 0 | 0 | 0 | 3 |
| <u>SMURF1</u>   | 1 | 1 | 0 | 1 | 0 | 0 | 0 | 0 | 0 | 0 | 3 |
| <u>PHTF2</u>    | 1 | 0 | 0 | 1 | 0 | 0 | 0 | 0 | 0 | 1 | 3 |
| <u>PHTF2</u>    | 1 | 0 | 0 | 1 | 0 | 0 | 0 | 0 | 0 | 1 | 3 |
| <u>KIAA1191</u> | 1 | 1 | 0 | 1 | 0 | 0 | 0 | 0 | 0 | 0 | 3 |
| <u>KIAA1191</u> | 1 | 0 | 0 | 1 | 0 | 0 | 1 | 0 | 0 | 0 | 3 |
| <u>SLC39A10</u> | 1 | 0 | 0 | 1 | 0 | 0 | 0 | 0 | 0 | 1 | 3 |
| <u>PSMD13</u>   | 1 | 1 | 0 | 1 | 0 | 0 | 0 | 0 | 0 | 0 | 3 |
| <u>GPR126</u>   | 1 | 0 | 0 | 1 | 0 | 0 | 0 | 0 | 0 | 1 | 3 |
| <u>C13orf1</u>  | 0 | 1 | 0 | 1 | 0 | 0 | 1 | 0 | 0 | 0 | 3 |
| <u>ERGIC1</u>   | 0 | 0 | 0 | 1 | 0 | 0 | 1 | 0 | 0 | 1 | 3 |
| <u>SMEK2</u>    | 1 | 1 | 0 | 1 | 0 | 0 | 0 | 0 | 0 | 0 | 3 |
| <u>PTCH1</u>    | 0 | 1 | 0 | 1 | 0 | 0 | 0 | 0 | 0 | 1 | 3 |
| <u>PTCH1</u>    | 0 | 0 | 0 | 1 | 0 | 0 | 1 | 0 | 0 | 1 | 3 |

|                 |   |   |   |   |   |   |   |   |   |   |   |
|-----------------|---|---|---|---|---|---|---|---|---|---|---|
| <u>NDRG3</u>    | 1 | 0 | 0 | 1 | 0 | 0 | 0 | 0 | 0 | 1 | 3 |
| <u>NDRG2</u>    | 1 | 0 | 0 | 1 | 0 | 0 | 0 | 0 | 0 | 1 | 3 |
| <u>NDRG2</u>    | 1 | 0 | 0 | 1 | 0 | 0 | 0 | 0 | 0 | 1 | 3 |
| <u>NDRG2</u>    | 1 | 0 | 0 | 1 | 0 | 0 | 0 | 0 | 0 | 1 | 3 |
| <u>NDRG2</u>    | 1 | 0 | 0 | 1 | 0 | 0 | 0 | 0 | 0 | 1 | 3 |
| <u>NDRG2</u>    | 1 | 0 | 0 | 1 | 0 | 0 | 0 | 0 | 0 | 1 | 3 |
| <u>NLGN4X</u>   | 1 | 0 | 0 | 1 | 0 | 0 | 1 | 0 | 0 | 0 | 3 |
| <u>NLGN4X</u>   | 1 | 1 | 0 | 1 | 0 | 0 | 0 | 0 | 0 | 0 | 3 |
| <u>MTUS1</u>    | 1 | 0 | 0 | 1 | 0 | 0 | 0 | 0 | 0 | 1 | 3 |
| <u>MTUS1</u>    | 1 | 0 | 0 | 1 | 0 | 0 | 0 | 0 | 0 | 1 | 3 |
| <u>MTUS1</u>    | 1 | 0 | 0 | 1 | 0 | 0 | 0 | 0 | 0 | 1 | 3 |
| <u>PCDH19</u>   | 1 | 0 | 0 | 1 | 0 | 0 | 0 | 0 | 0 | 1 | 3 |
| <u>TBC1D14</u>  | 1 | 0 | 0 | 1 | 0 | 0 | 0 | 0 | 0 | 1 | 3 |
| <u>TBC1D14</u>  | 1 | 0 | 0 | 1 | 0 | 0 | 0 | 0 | 0 | 1 | 3 |
| <u>STAMBPL1</u> | 0 | 1 | 0 | 1 | 0 | 0 | 0 | 0 | 0 | 1 | 3 |
| <u>FAM135A</u>  | 1 | 0 | 0 | 1 | 0 | 0 | 0 | 0 | 0 | 1 | 3 |
| <u>FNIP2</u>    | 0 | 1 | 0 | 1 | 0 | 0 | 1 | 0 | 0 | 0 | 3 |
| <u>C8orf79</u>  | 0 | 1 | 0 | 1 | 0 | 0 | 1 | 0 | 0 | 0 | 3 |
| <u>CYP4F11</u>  | 1 | 1 | 0 | 1 | 0 | 0 | 0 | 0 | 0 | 0 | 3 |
| <u>CYP4F11</u>  | 1 | 0 | 0 | 1 | 0 | 0 | 1 | 0 | 0 | 0 | 3 |
| <u>PTPRB</u>    | 1 | 0 | 0 | 1 | 0 | 0 | 0 | 0 | 0 | 1 | 3 |
| <u>PTPRC</u>    | 1 | 0 | 0 | 1 | 0 | 0 | 0 | 0 | 0 | 1 | 3 |
| <u>PTPRE</u>    | 1 | 0 | 0 | 1 | 0 | 0 | 0 | 0 | 0 | 1 | 3 |
| <u>PXMP3</u>    | 0 | 0 | 0 | 1 | 0 | 0 | 1 | 0 | 0 | 1 | 3 |
| <u>RRAGD</u>    | 1 | 1 | 0 | 1 | 0 | 0 | 0 | 0 | 0 | 0 | 3 |
| <u>PLEKHA1</u>  | 1 | 0 | 0 | 1 | 0 | 0 | 0 | 0 | 0 | 1 | 3 |
| <u>RBMS2</u>    | 0 | 1 | 0 | 1 | 0 | 0 | 0 | 0 | 0 | 1 | 3 |
| <u>RGS13</u>    | 0 | 1 | 0 | 1 | 0 | 0 | 0 | 0 | 0 | 1 | 3 |
| <u>RNASE4</u>   | 1 | 0 | 0 | 1 | 0 | 0 | 1 | 0 | 0 | 0 | 3 |
| <u>BCL6</u>     | 1 | 0 | 0 | 1 | 0 | 0 | 0 | 0 | 0 | 1 | 3 |
| <u>RNF6</u>     | 1 | 0 | 0 | 1 | 0 | 0 | 0 | 0 | 0 | 1 | 3 |
| <u>ROBO2</u>    | 1 | 0 | 0 | 1 | 0 | 0 | 0 | 0 | 0 | 1 | 3 |
| <u>RORA</u>     | 0 | 1 | 0 | 1 | 0 | 0 | 1 | 0 | 0 | 0 | 3 |
| <u>BDH1</u>     | 1 | 1 | 0 | 1 | 0 | 0 | 0 | 0 | 0 | 0 | 3 |
| <u>BDH1</u>     | 1 | 0 | 0 | 1 | 0 | 0 | 1 | 0 | 0 | 0 | 3 |
| <u>ATXN7</u>    | 0 | 1 | 1 | 1 | 0 | 0 | 0 | 0 | 0 | 0 | 3 |
| <u>SCP2</u>     | 0 | 1 | 0 | 1 | 0 | 0 | 1 | 0 | 0 | 0 | 3 |
| <u>CXCL12</u>   | 0 | 1 | 0 | 1 | 0 | 0 | 0 | 0 | 0 | 1 | 3 |
| <u>PRDM1</u>    | 1 | 0 | 0 | 1 | 0 | 0 | 0 | 0 | 0 | 1 | 3 |
| <u>PERP</u>     | 0 | 1 | 0 | 1 | 0 | 0 | 0 | 0 | 0 | 1 | 3 |
| <u>NPAS3</u>    | 1 | 1 | 0 | 1 | 0 | 0 | 0 | 0 | 0 | 0 | 3 |

|                    |   |   |   |   |   |   |   |   |   |   |   |
|--------------------|---|---|---|---|---|---|---|---|---|---|---|
| <u>PAPD5</u>       | 1 | 0 | 0 | 1 | 0 | 0 | 0 | 0 | 0 | 1 | 3 |
| <u>LOC643641</u>   | 0 | 1 | 0 | 1 | 0 | 0 | 1 | 0 | 0 | 0 | 3 |
| <u>hCG_1776018</u> | 0 | 1 | 0 | 1 | 0 | 0 | 1 | 0 | 0 | 0 | 3 |
| <u>SGK1</u>        | 1 | 0 | 0 | 1 | 0 | 0 | 1 | 0 | 0 | 0 | 3 |
| <u>CXorf30</u>     | 0 | 1 | 0 | 1 | 0 | 0 | 0 | 0 | 0 | 1 | 3 |
| <u>SH3BP2</u>      | 1 | 0 | 0 | 1 | 0 | 0 | 0 | 0 | 0 | 1 | 3 |
| <u>ITSN1</u>       | 1 | 0 | 0 | 1 | 0 | 0 | 0 | 0 | 0 | 1 | 3 |
| <u>C3orf65</u>     | 0 | 0 | 0 | 1 | 0 | 0 | 1 | 0 | 0 | 1 | 3 |
| <u>NUCKS1</u>      | 0 | 1 | 1 | 1 | 0 | 0 | 0 | 0 | 0 | 0 | 3 |
| <u>ATPAF1</u>      | 1 | 0 | 0 | 1 | 0 | 0 | 0 | 0 | 0 | 1 | 3 |
| <u>TBC1D15</u>     | 0 | 1 | 0 | 1 | 0 | 0 | 0 | 0 | 0 | 1 | 3 |
| <u>C1orf176</u>    | 0 | 1 | 0 | 1 | 0 | 0 | 1 | 0 | 0 | 0 | 3 |
| <u>RABL5</u>       | 1 | 0 | 0 | 1 | 0 | 0 | 0 | 0 | 0 | 1 | 3 |
| <u>RABL5</u>       | 1 | 0 | 0 | 1 | 0 | 0 | 0 | 0 | 0 | 1 | 3 |
| <u>USP46</u>       | 1 | 0 | 0 | 1 | 0 | 0 | 0 | 0 | 0 | 1 | 3 |
| <u>ST8SIA1</u>     | 0 | 1 | 0 | 1 | 0 | 0 | 0 | 0 | 0 | 1 | 3 |
| <u>TTC23</u>       | 1 | 0 | 0 | 1 | 0 | 0 | 0 | 0 | 0 | 1 | 3 |
| <u>TTC23</u>       | 1 | 0 | 0 | 1 | 0 | 0 | 0 | 0 | 0 | 1 | 3 |
| <u>TTC23</u>       | 1 | 0 | 0 | 1 | 0 | 0 | 0 | 0 | 0 | 1 | 3 |
| <u>TTC23</u>       | 1 | 0 | 0 | 1 | 0 | 0 | 0 | 0 | 0 | 1 | 3 |
| <u>SKP1</u>        | 0 | 1 | 0 | 1 | 0 | 0 | 0 | 0 | 0 | 1 | 3 |
| <u>NDRG4</u>       | 1 | 0 | 0 | 1 | 0 | 0 | 0 | 0 | 0 | 1 | 3 |
| <u>NDRG4</u>       | 1 | 0 | 0 | 1 | 0 | 0 | 0 | 0 | 0 | 1 | 3 |
| <u>SLA</u>         | 1 | 0 | 0 | 1 | 0 | 0 | 0 | 0 | 0 | 1 | 3 |
| <u>SLC7A2</u>      | 1 | 0 | 0 | 1 | 0 | 0 | 0 | 0 | 0 | 1 | 3 |
| <u>SLIT1</u>       | 1 | 1 | 0 | 1 | 0 | 0 | 0 | 0 | 0 | 0 | 3 |
| <u>PHACTR4</u>     | 1 | 0 | 0 | 1 | 0 | 0 | 0 | 0 | 0 | 1 | 3 |
| <u>CAPRN2</u>      | 1 | 0 | 0 | 1 | 0 | 0 | 0 | 0 | 0 | 1 | 3 |
| <u>SMARCC2</u>     | 1 | 1 | 0 | 1 | 0 | 0 | 0 | 0 | 0 | 0 | 3 |
| <u>SNAP25</u>      | 1 | 0 | 0 | 1 | 0 | 0 | 0 | 0 | 0 | 1 | 3 |
| <u>SNTB1</u>       | 0 | 1 | 0 | 1 | 0 | 0 | 0 | 0 | 0 | 1 | 3 |
| <u>SNX1</u>        | 1 | 0 | 0 | 1 | 0 | 0 | 0 | 0 | 0 | 1 | 3 |
| <u>SNX1</u>        | 1 | 0 | 0 | 1 | 0 | 0 | 0 | 0 | 0 | 1 | 3 |
| <u>SP3</u>         | 1 | 0 | 0 | 1 | 0 | 0 | 1 | 0 | 0 | 0 | 3 |
| <u>SP3</u>         | 1 | 1 | 0 | 1 | 0 | 0 | 0 | 0 | 0 | 0 | 3 |
| <u>SP100</u>       | 1 | 1 | 0 | 1 | 0 | 0 | 0 | 0 | 0 | 0 | 3 |
| <u>SPP1</u>        | 1 | 0 | 0 | 1 | 0 | 0 | 0 | 0 | 0 | 1 | 3 |
| <u>SPP1</u>        | 1 | 0 | 0 | 1 | 0 | 0 | 0 | 0 | 0 | 1 | 3 |
| <u>SSR1</u>        | 0 | 1 | 0 | 1 | 0 | 0 | 0 | 0 | 0 | 1 | 3 |
| <u>STAT3</u>       | 1 | 0 | 0 | 1 | 0 | 0 | 0 | 0 | 0 | 1 | 3 |
| <u>STAT3</u>       | 0 | 1 | 0 | 1 | 0 | 0 | 0 | 0 | 0 | 1 | 3 |

|                 |   |   |   |   |   |   |   |   |   |   |   |
|-----------------|---|---|---|---|---|---|---|---|---|---|---|
| <u>STYX</u>     | 1 | 1 | 0 | 1 | 0 | 0 | 0 | 0 | 0 | 0 | 3 |
| <u>STYX</u>     | 1 | 0 | 0 | 1 | 0 | 0 | 1 | 0 | 0 | 0 | 3 |
| <u>SULT1C2</u>  | 1 | 0 | 0 | 1 | 0 | 0 | 0 | 0 | 0 | 1 | 3 |
| <u>TGFB1</u>    | 1 | 0 | 0 | 1 | 0 | 0 | 0 | 0 | 0 | 1 | 3 |
| <u>TGFB2</u>    | 1 | 0 | 0 | 1 | 0 | 0 | 0 | 0 | 0 | 1 | 3 |
| <u>THRB</u>     | 1 | 0 | 0 | 1 | 0 | 0 | 0 | 0 | 0 | 1 | 3 |
| <u>THRB</u>     | 1 | 0 | 0 | 1 | 0 | 0 | 0 | 0 | 0 | 1 | 3 |
| <u>TIAL1</u>    | 1 | 0 | 0 | 1 | 0 | 0 | 0 | 0 | 0 | 1 | 3 |
| <u>TPD52</u>    | 1 | 0 | 0 | 1 | 0 | 0 | 0 | 0 | 0 | 1 | 3 |
| <u>TUB</u>      | 1 | 0 | 0 | 1 | 0 | 0 | 0 | 0 | 0 | 1 | 3 |
| <u>TUFM</u>     | 0 | 1 | 0 | 1 | 0 | 0 | 0 | 0 | 0 | 1 | 3 |
| <u>FLJ78302</u> | 1 | 1 | 0 | 1 | 0 | 0 | 0 | 0 | 0 | 0 | 3 |
| <u>TXNRD1</u>   | 1 | 1 | 0 | 1 | 0 | 0 | 0 | 0 | 0 | 0 | 3 |
| <u>TXNRD1</u>   | 1 | 0 | 0 | 1 | 0 | 0 | 1 | 0 | 0 | 0 | 3 |
| <u>UBE2A</u>    | 1 | 0 | 0 | 1 | 0 | 0 | 0 | 0 | 0 | 1 | 3 |
| <u>UBE3A</u>    | 1 | 1 | 0 | 1 | 0 | 0 | 0 | 0 | 0 | 0 | 3 |
| <u>UBE3A</u>    | 1 | 0 | 0 | 1 | 0 | 0 | 1 | 0 | 0 | 0 | 3 |
| <u>UBP1</u>     | 1 | 0 | 0 | 1 | 0 | 0 | 0 | 0 | 0 | 1 | 3 |
| <u>UTY</u>      | 1 | 0 | 0 | 1 | 0 | 0 | 1 | 0 | 0 | 0 | 3 |
| <u>VCAM1</u>    | 1 | 0 | 0 | 1 | 0 | 0 | 0 | 0 | 0 | 1 | 3 |
| <u>VEGFA</u>    | 1 | 1 | 0 | 1 | 0 | 0 | 0 | 0 | 0 | 0 | 3 |
| <u>VEGFA</u>    | 1 | 1 | 0 | 1 | 0 | 0 | 0 | 0 | 0 | 0 | 3 |
| <u>VIP</u>      | 1 | 0 | 0 | 1 | 0 | 0 | 0 | 0 | 0 | 1 | 3 |
| <u>TRPV1</u>    | 1 | 1 | 0 | 1 | 0 | 0 | 0 | 0 | 0 | 0 | 3 |
| <u>TRPV1</u>    | 1 | 0 | 0 | 1 | 0 | 0 | 1 | 0 | 0 | 0 | 3 |
| <u>WHSC1</u>    | 1 | 0 | 0 | 1 | 0 | 0 | 0 | 0 | 0 | 1 | 3 |
| <u>WHSC1</u>    | 1 | 0 | 0 | 1 | 0 | 0 | 0 | 0 | 0 | 1 | 3 |
| <u>WHSC1</u>    | 1 | 0 | 0 | 1 | 0 | 0 | 0 | 0 | 0 | 1 | 3 |
| <u>YWHAB</u>    | 1 | 0 | 0 | 1 | 0 | 0 | 0 | 0 | 0 | 1 | 3 |
| <u>C18orf1</u>  | 1 | 0 | 0 | 1 | 0 | 0 | 0 | 0 | 0 | 1 | 3 |
| <u>C18orf1</u>  | 1 | 0 | 0 | 1 | 0 | 0 | 0 | 0 | 0 | 1 | 3 |
| <u>C18orf1</u>  | 1 | 0 | 0 | 1 | 0 | 0 | 0 | 0 | 0 | 1 | 3 |
| <u>C18orf1</u>  | 1 | 0 | 0 | 1 | 0 | 0 | 0 | 0 | 0 | 1 | 3 |
| <u>SF1</u>      | 1 | 0 | 0 | 1 | 0 | 0 | 0 | 0 | 0 | 1 | 3 |
| <u>ZNF133</u>   | 1 | 1 | 0 | 1 | 0 | 0 | 0 | 0 | 0 | 0 | 3 |
| <u>ZNF133</u>   | 1 | 0 | 0 | 1 | 0 | 0 | 1 | 0 | 0 | 0 | 3 |
| <u>ZNF200</u>   | 1 | 0 | 0 | 1 | 0 | 0 | 0 | 0 | 0 | 1 | 3 |
| <u>ZNF207</u>   | 1 | 0 | 0 | 1 | 0 | 0 | 0 | 0 | 0 | 1 | 3 |
| <u>LRP8</u>     | 1 | 0 | 0 | 1 | 0 | 0 | 0 | 0 | 0 | 1 | 3 |
| <u>LRP8</u>     | 1 | 0 | 0 | 1 | 0 | 0 | 0 | 0 | 0 | 1 | 3 |
| <u>LRP8</u>     | 1 | 0 | 0 | 1 | 0 | 0 | 0 | 0 | 0 | 1 | 3 |

|                  |   |   |   |   |   |   |   |   |   |   |   |
|------------------|---|---|---|---|---|---|---|---|---|---|---|
| <u>CACNB2</u>    | 0 | 0 | 0 | 1 | 1 | 0 | 0 | 0 | 0 | 1 | 3 |
| <u>ZNF655</u>    | 1 | 0 | 0 | 1 | 0 | 0 | 0 | 0 | 0 | 1 | 3 |
| <u>CHCHD7</u>    | 0 | 0 | 1 | 1 | 0 | 0 | 1 | 0 | 0 | 0 | 3 |
| <u>ZNF557</u>    | 1 | 0 | 0 | 1 | 0 | 0 | 0 | 0 | 0 | 1 | 3 |
| <u>EPM2A</u>     | 1 | 1 | 0 | 1 | 0 | 0 | 0 | 0 | 0 | 0 | 3 |
| <u>RNF128</u>    | 1 | 0 | 0 | 1 | 0 | 0 | 0 | 0 | 0 | 1 | 3 |
| <u>CALCA</u>     | 0 | 1 | 0 | 1 | 0 | 0 | 0 | 0 | 0 | 1 | 3 |
| <u>HMBOX1</u>    | 1 | 0 | 0 | 1 | 0 | 0 | 1 | 0 | 0 | 0 | 3 |
| <u>C1orf108</u>  | 1 | 1 | 0 | 1 | 0 | 0 | 0 | 0 | 0 | 0 | 3 |
| <u>NARG2</u>     | 1 | 0 | 0 | 1 | 0 | 0 | 0 | 0 | 0 | 1 | 3 |
| <u>FASTKD1</u>   | 0 | 1 | 0 | 1 | 0 | 0 | 0 | 0 | 0 | 1 | 3 |
| <u>C14orf169</u> | 0 | 1 | 0 | 1 | 0 | 0 | 1 | 0 | 0 | 0 | 3 |
| <u>PPCS</u>      | 1 | 0 | 0 | 1 | 0 | 0 | 0 | 0 | 0 | 1 | 3 |
| <u>C10orf68</u>  | 0 | 1 | 0 | 1 | 0 | 0 | 1 | 0 | 0 | 0 | 3 |
| <u>ZNF419</u>    | 1 | 0 | 0 | 1 | 0 | 0 | 0 | 0 | 0 | 1 | 3 |
| <u>ZNF419</u>    | 1 | 0 | 0 | 1 | 0 | 0 | 0 | 0 | 0 | 1 | 3 |
| <u>ZNF419</u>    | 1 | 0 | 0 | 1 | 0 | 0 | 0 | 0 | 0 | 1 | 3 |
| <u>ZNF419</u>    | 1 | 0 | 0 | 1 | 0 | 0 | 0 | 0 | 0 | 1 | 3 |
| <u>ZNF419</u>    | 1 | 0 | 0 | 1 | 0 | 0 | 0 | 0 | 0 | 1 | 3 |
| <u>ACBD4</u>     | 1 | 0 | 0 | 1 | 0 | 0 | 1 | 0 | 0 | 0 | 3 |
| <u>ALG9</u>      | 1 | 0 | 0 | 1 | 0 | 0 | 0 | 0 | 0 | 1 | 3 |
| <u>JMJD5</u>     | 1 | 0 | 0 | 1 | 0 | 0 | 1 | 0 | 0 | 0 | 3 |
| <u>C2orf54</u>   | 1 | 0 | 0 | 1 | 0 | 0 | 0 | 0 | 0 | 1 | 3 |
| <u>KIAA0319L</u> | 1 | 1 | 0 | 1 | 0 | 0 | 0 | 0 | 0 | 0 | 3 |
| <u>SYNPO2L</u>   | 1 | 1 | 0 | 1 | 0 | 0 | 0 | 0 | 0 | 0 | 3 |
| <u>MYST3</u>     | 1 | 0 | 0 | 1 | 0 | 0 | 1 | 0 | 0 | 0 | 3 |
| <u>MYST3</u>     | 1 | 1 | 0 | 1 | 0 | 0 | 0 | 0 | 0 | 0 | 3 |
| <u>DNAJB14</u>   | 0 | 0 | 0 | 1 | 0 | 0 | 1 | 0 | 0 | 1 | 3 |
| <u>PANK2</u>     | 1 | 0 | 0 | 1 | 0 | 0 | 0 | 0 | 0 | 1 | 3 |
| <u>PANK2</u>     | 1 | 0 | 0 | 1 | 0 | 0 | 0 | 0 | 0 | 1 | 3 |
| <u>SEMA6D</u>    | 0 | 1 | 0 | 1 | 0 | 0 | 0 | 0 | 0 | 1 | 3 |
| <u>TRPM3</u>     | 1 | 0 | 0 | 1 | 0 | 0 | 0 | 0 | 0 | 1 | 3 |
| <u>TRPM3</u>     | 1 | 0 | 0 | 1 | 0 | 0 | 0 | 0 | 0 | 1 | 3 |
| <u>TRPM3</u>     | 1 | 0 | 0 | 1 | 0 | 0 | 0 | 0 | 0 | 1 | 3 |
| <u>ASRGL1</u>    | 1 | 0 | 0 | 1 | 0 | 0 | 0 | 0 | 0 | 1 | 3 |
| <u>IFT74</u>     | 1 | 1 | 0 | 1 | 0 | 0 | 0 | 0 | 0 | 0 | 3 |
| <u>LHX3</u>      | 1 | 0 | 0 | 1 | 0 | 0 | 0 | 0 | 0 | 1 | 3 |
| <u>MLLT10</u>    | 0 | 1 | 0 | 1 | 0 | 0 | 0 | 0 | 0 | 1 | 3 |
| <u>WDR23</u>     | 1 | 0 | 0 | 1 | 0 | 0 | 0 | 0 | 0 | 1 | 3 |
| <u>COASY</u>     | 1 | 0 | 0 | 1 | 0 | 0 | 0 | 0 | 0 | 1 | 3 |
| <u>COASY</u>     | 1 | 0 | 0 | 1 | 0 | 0 | 0 | 0 | 0 | 1 | 3 |

|                 |   |   |   |   |   |   |   |   |   |   |   |
|-----------------|---|---|---|---|---|---|---|---|---|---|---|
| <u>COASY</u>    | 1 | 0 | 0 | 1 | 0 | 0 | 0 | 0 | 0 | 1 | 3 |
| <u>TMEM22</u>   | 1 | 0 | 0 | 1 | 0 | 0 | 0 | 0 | 0 | 1 | 3 |
| <u>ITIH5</u>    | 1 | 0 | 0 | 1 | 0 | 0 | 0 | 0 | 0 | 1 | 3 |
| <u>WNT5B</u>    | 1 | 0 | 0 | 1 | 0 | 0 | 0 | 0 | 0 | 1 | 3 |
| <u>ANP32A</u>   | 1 | 1 | 0 | 1 | 0 | 0 | 0 | 0 | 0 | 0 | 3 |
| <u>CALU</u>     | 1 | 0 | 0 | 1 | 0 | 0 | 0 | 0 | 0 | 1 | 3 |
| <u>TAF15</u>    | 0 | 1 | 0 | 1 | 0 | 0 | 0 | 0 | 0 | 1 | 3 |
| <u>NCOA3</u>    | 1 | 0 | 0 | 1 | 0 | 0 | 0 | 0 | 0 | 1 | 3 |
| <u>USP9X</u>    | 1 | 0 | 0 | 1 | 0 | 0 | 0 | 0 | 0 | 1 | 3 |
| <u>COLQ</u>     | 1 | 1 | 0 | 1 | 0 | 0 | 0 | 0 | 0 | 0 | 3 |
| <u>COLQ</u>     | 1 | 0 | 0 | 1 | 0 | 0 | 1 | 0 | 0 | 0 | 3 |
| <u>PICALM</u>   | 1 | 0 | 0 | 1 | 0 | 0 | 0 | 0 | 0 | 1 | 3 |
| <u>ACOX3</u>    | 0 | 1 | 0 | 1 | 0 | 0 | 0 | 0 | 0 | 1 | 3 |
| <u>LRRC48</u>   | 0 | 1 | 0 | 1 | 0 | 0 | 0 | 0 | 0 | 1 | 3 |
| <u>DDX59</u>    | 0 | 0 | 0 | 1 | 0 | 0 | 1 | 0 | 0 | 1 | 3 |
| <u>HIST1H3D</u> | 0 | 1 | 0 | 1 | 0 | 0 | 0 | 0 | 0 | 1 | 3 |
| <u>FCAMR</u>    | 1 | 1 | 0 | 1 | 0 | 0 | 0 | 0 | 0 | 0 | 3 |
| <u>NCALD</u>    | 1 | 0 | 0 | 1 | 0 | 0 | 0 | 0 | 0 | 1 | 3 |
| <u>C11orf56</u> | 1 | 0 | 0 | 1 | 0 | 0 | 0 | 0 | 0 | 1 | 3 |
| <u>CASP8</u>    | 1 | 1 | 0 | 1 | 0 | 0 | 0 | 0 | 0 | 0 | 3 |
| <u>ARL6</u>     | 1 | 1 | 0 | 1 | 0 | 0 | 0 | 0 | 0 | 0 | 3 |
| <u>STK24</u>    | 1 | 0 | 0 | 1 | 0 | 0 | 0 | 0 | 0 | 1 | 3 |
| <u>NCK2</u>     | 1 | 1 | 0 | 1 | 0 | 0 | 0 | 0 | 0 | 0 | 3 |
| <u>NCK2</u>     | 1 | 1 | 0 | 1 | 0 | 0 | 0 | 0 | 0 | 0 | 3 |
| <u>C15orf48</u> | 1 | 0 | 0 | 1 | 0 | 0 | 0 | 0 | 0 | 1 | 3 |
| <u>PARD6B</u>   | 0 | 1 | 0 | 1 | 0 | 0 | 0 | 0 | 0 | 1 | 3 |
| <u>SORBS2</u>   | 1 | 0 | 0 | 1 | 0 | 0 | 0 | 0 | 0 | 1 | 3 |
| <u>GTPBP3</u>   | 1 | 0 | 0 | 1 | 0 | 0 | 0 | 0 | 0 | 1 | 3 |
| <u>PSRC1</u>    | 1 | 0 | 0 | 1 | 0 | 0 | 0 | 0 | 0 | 1 | 3 |
| <u>MINA</u>     | 1 | 0 | 0 | 1 | 0 | 0 | 0 | 0 | 0 | 1 | 3 |
| <u>PTPN5</u>    | 1 | 0 | 0 | 1 | 0 | 0 | 1 | 0 | 0 | 0 | 3 |
| <u>PTPN5</u>    | 1 | 1 | 0 | 1 | 0 | 0 | 0 | 0 | 0 | 0 | 3 |
| <u>TBRG1</u>    | 0 | 1 | 0 | 1 | 0 | 0 | 0 | 0 | 0 | 1 | 3 |
| <u>RANBP3</u>   | 1 | 0 | 0 | 1 | 0 | 0 | 0 | 0 | 0 | 1 | 3 |
| <u>RANBP3</u>   | 1 | 0 | 0 | 1 | 0 | 0 | 0 | 0 | 0 | 1 | 3 |
| <u>PIGY</u>     | 1 | 1 | 0 | 1 | 0 | 0 | 0 | 0 | 0 | 0 | 3 |
| <u>PIK3R3</u>   | 1 | 0 | 0 | 1 | 0 | 0 | 0 | 0 | 0 | 1 | 3 |
| <u>GAS7</u>     | 1 | 0 | 0 | 1 | 0 | 0 | 0 | 0 | 0 | 1 | 3 |
| <u>GAS7</u>     | 1 | 0 | 0 | 1 | 0 | 0 | 0 | 0 | 0 | 1 | 3 |
| <u>GAS7</u>     | 1 | 0 | 0 | 1 | 0 | 0 | 0 | 0 | 0 | 1 | 3 |
| <u>DDO</u>      | 1 | 0 | 0 | 1 | 0 | 0 | 0 | 0 | 0 | 1 | 3 |



|                  |   |   |   |   |   |   |   |   |   |   |   |
|------------------|---|---|---|---|---|---|---|---|---|---|---|
| <u>SHANK3</u>    | 0 | 1 | 0 | 1 | 0 | 0 | 1 | 0 | 0 | 0 | 3 |
| <u>CDC14B</u>    | 1 | 0 | 0 | 1 | 0 | 0 | 0 | 0 | 0 | 1 | 3 |
| <u>CDC14B</u>    | 1 | 0 | 0 | 1 | 0 | 0 | 0 | 0 | 0 | 1 | 3 |
| <u>MADD</u>      | 1 | 0 | 0 | 1 | 0 | 0 | 0 | 0 | 0 | 1 | 3 |
| <u>MADD</u>      | 1 | 0 | 0 | 1 | 0 | 0 | 0 | 0 | 0 | 1 | 3 |
| <u>MADD</u>      | 1 | 0 | 0 | 1 | 0 | 0 | 0 | 0 | 0 | 1 | 3 |
| <u>MADD</u>      | 1 | 0 | 0 | 1 | 0 | 0 | 0 | 0 | 0 | 1 | 3 |
| <u>MADD</u>      | 1 | 0 | 0 | 1 | 0 | 0 | 0 | 0 | 0 | 1 | 3 |
| <u>KHSRP</u>     | 0 | 1 | 0 | 1 | 0 | 0 | 0 | 0 | 0 | 1 | 3 |
| <u>GTPBP10</u>   | 1 | 0 | 0 | 1 | 0 | 0 | 0 | 0 | 0 | 1 | 3 |
| <u>TP63</u>      | 1 | 0 | 0 | 1 | 0 | 0 | 0 | 0 | 0 | 1 | 3 |
| <u>TP63</u>      | 1 | 0 | 0 | 1 | 0 | 0 | 0 | 0 | 0 | 1 | 3 |
| <u>PDE5A</u>     | 1 | 0 | 0 | 1 | 0 | 0 | 0 | 0 | 0 | 1 | 3 |
| <u>SLC4A4</u>    | 1 | 0 | 0 | 1 | 0 | 0 | 0 | 0 | 0 | 1 | 3 |
| <u>C19orf2</u>   | 1 | 0 | 0 | 1 | 0 | 0 | 0 | 0 | 0 | 1 | 3 |
| <u>TNFRSF10B</u> | 1 | 0 | 0 | 1 | 0 | 0 | 0 | 0 | 0 | 1 | 3 |
| <u>INPP4B</u>    | 0 | 1 | 0 | 1 | 0 | 0 | 0 | 0 | 0 | 1 | 3 |
| <u>CCBL1</u>     | 1 | 1 | 0 | 1 | 0 | 0 | 0 | 0 | 0 | 0 | 3 |
| <u>AKAP4</u>     | 1 | 0 | 0 | 1 | 0 | 0 | 0 | 0 | 0 | 1 | 3 |
| <u>VNN2</u>      | 1 | 0 | 0 | 1 | 0 | 0 | 0 | 0 | 0 | 1 | 3 |
| <u>KRIT1</u>     | 1 | 0 | 0 | 1 | 0 | 0 | 0 | 0 | 0 | 1 | 3 |
| <u>KRIT1</u>     | 1 | 0 | 0 | 1 | 0 | 0 | 0 | 0 | 0 | 1 | 3 |
| <u>TRIM4</u>     | 1 | 0 | 0 | 1 | 0 | 0 | 1 | 0 | 0 | 0 | 3 |
| <u>TRIM4</u>     | 1 | 1 | 0 | 1 | 0 | 0 | 0 | 0 | 0 | 0 | 3 |
| <u>WASF1</u>     | 1 | 0 | 0 | 1 | 0 | 0 | 0 | 0 | 0 | 1 | 3 |
| <u>WASF1</u>     | 1 | 0 | 0 | 1 | 0 | 0 | 0 | 0 | 0 | 1 | 3 |
| <u>AP3D1</u>     | 1 | 0 | 0 | 1 | 0 | 0 | 0 | 0 | 0 | 1 | 3 |
| <u>BTRC</u>      | 1 | 0 | 0 | 1 | 0 | 0 | 0 | 0 | 0 | 1 | 3 |
| <u>P4HA2</u>     | 1 | 0 | 0 | 1 | 0 | 0 | 0 | 0 | 0 | 1 | 3 |
| <u>P4HA2</u>     | 1 | 0 | 0 | 1 | 0 | 0 | 0 | 0 | 0 | 1 | 3 |
| <u>FAM125B</u>   | 0 | 1 | 0 | 1 | 0 | 0 | 0 | 0 | 0 | 1 | 3 |
| <u>KALRN</u>     | 1 | 0 | 0 | 1 | 0 | 0 | 0 | 0 | 0 | 1 | 3 |
| <u>PHLDB2</u>    | 1 | 0 | 0 | 1 | 0 | 0 | 0 | 0 | 0 | 1 | 3 |
| <u>PHLDB2</u>    | 1 | 0 | 0 | 1 | 0 | 0 | 0 | 0 | 0 | 1 | 3 |
| <u>TMEM41A</u>   | 0 | 1 | 0 | 1 | 0 | 0 | 1 | 0 | 0 | 0 | 3 |
| <u>SPAG9</u>     | 1 | 0 | 0 | 1 | 0 | 0 | 0 | 0 | 0 | 1 | 3 |
| <u>C12orf23</u>  | 0 | 1 | 0 | 1 | 0 | 0 | 0 | 0 | 0 | 1 | 3 |
| <u>SLC7A6</u>    | 0 | 0 | 0 | 1 | 0 | 0 | 1 | 0 | 0 | 1 | 3 |
| <u>TBX18</u>     | 0 | 1 | 0 | 1 | 0 | 0 | 1 | 0 | 0 | 0 | 3 |
| <u>USP14</u>     | 1 | 0 | 0 | 1 | 0 | 0 | 0 | 0 | 0 | 1 | 3 |
| <u>CD1E</u>      | 1 | 0 | 0 | 1 | 0 | 0 | 0 | 0 | 0 | 1 | 3 |

|         |   |   |   |   |   |   |   |   |   |   |   |
|---------|---|---|---|---|---|---|---|---|---|---|---|
| CD1E    | 1 | 0 | 0 | 1 | 0 | 0 | 0 | 0 | 0 | 1 | 3 |
| CD1E    | 1 | 0 | 0 | 1 | 0 | 0 | 0 | 0 | 0 | 1 | 3 |
| CD1E    | 1 | 0 | 0 | 1 | 0 | 0 | 0 | 0 | 0 | 1 | 3 |
| CBFA2T2 | 1 | 0 | 0 | 1 | 0 | 0 | 0 | 0 | 0 | 1 | 3 |
| ZNF502  | 1 | 1 | 0 | 1 | 0 | 0 | 0 | 0 | 0 | 0 | 3 |
| ZNF502  | 1 | 0 | 0 | 1 | 0 | 0 | 1 | 0 | 0 | 0 | 3 |
| SESTD1  | 0 | 1 | 0 | 1 | 0 | 0 | 0 | 0 | 1 | 0 | 3 |
| EXO1    | 1 | 1 | 0 | 1 | 0 | 0 | 0 | 0 | 0 | 0 | 3 |
| SLFN11  | 0 | 0 | 0 | 1 | 0 | 0 | 1 | 0 | 0 | 1 | 3 |
| SLFN11  | 0 | 1 | 0 | 1 | 0 | 0 | 0 | 0 | 0 | 1 | 3 |
| SLFN11  | 1 | 0 | 0 | 1 | 0 | 0 | 0 | 0 | 0 | 1 | 3 |
| SLFN11  | 1 | 0 | 0 | 1 | 0 | 0 | 0 | 0 | 0 | 1 | 3 |
| CHURC1  | 0 | 0 | 0 | 1 | 0 | 0 | 1 | 0 | 0 | 1 | 3 |
| MYADM   | 1 | 0 | 0 | 1 | 0 | 0 | 0 | 0 | 0 | 1 | 3 |
| MYADM   | 1 | 0 | 0 | 1 | 0 | 0 | 0 | 0 | 0 | 1 | 3 |
| NEK9    | 1 | 1 | 0 | 1 | 0 | 0 | 0 | 0 | 0 | 0 | 3 |
| CABLES1 | 1 | 0 | 0 | 1 | 0 | 0 | 0 | 0 | 0 | 1 | 3 |
| WDR20   | 0 | 0 | 0 | 1 | 1 | 1 | 0 | 0 | 0 | 0 | 3 |
| WDR20   | 0 | 0 | 0 | 1 | 1 | 1 | 0 | 0 | 0 | 0 | 3 |
| BUB3    | 0 | 1 | 0 | 1 | 0 | 0 | 0 | 0 | 1 | 0 | 3 |
| REPS2   | 1 | 0 | 0 | 1 | 0 | 0 | 0 | 0 | 0 | 1 | 3 |
| FAM58A  | 1 | 0 | 0 | 1 | 0 | 0 | 0 | 0 | 0 | 1 | 3 |
| MAGI1   | 0 | 0 | 0 | 1 | 1 | 0 | 0 | 0 | 0 | 1 | 3 |
| MS4A1   | 0 | 0 | 0 | 1 | 0 | 0 | 1 | 0 | 0 | 1 | 3 |
| ANUBL1  | 0 | 1 | 0 | 1 | 0 | 0 | 0 | 0 | 0 | 1 | 3 |
| RECQL5  | 1 | 1 | 0 | 1 | 0 | 0 | 0 | 0 | 0 | 0 | 3 |
| TMEM203 | 0 | 1 | 0 | 1 | 0 | 0 | 1 | 0 | 0 | 0 | 3 |
| NCR2    | 0 | 1 | 0 | 1 | 0 | 0 | 0 | 0 | 0 | 1 | 3 |
| QKI     | 1 | 0 | 0 | 1 | 0 | 0 | 0 | 0 | 0 | 1 | 3 |
| HOMER2  | 1 | 0 | 0 | 1 | 0 | 0 | 0 | 0 | 0 | 1 | 3 |
| HOMER2  | 1 | 0 | 0 | 1 | 0 | 0 | 0 | 0 | 0 | 1 | 3 |
| HOMER2  | 1 | 0 | 0 | 1 | 0 | 0 | 0 | 0 | 0 | 1 | 3 |
| SLC4A8  | 1 | 0 | 0 | 1 | 0 | 0 | 0 | 0 | 0 | 1 | 3 |
| BAG5    | 1 | 0 | 0 | 1 | 0 | 0 | 0 | 0 | 0 | 1 | 3 |
| BAG5    | 1 | 0 | 0 | 1 | 0 | 0 | 0 | 0 | 0 | 1 | 3 |
| ENTPD1  | 0 | 1 | 0 | 1 | 0 | 0 | 0 | 0 | 0 | 1 | 3 |
| ENTPD1  | 0 | 0 | 0 | 1 | 0 | 0 | 1 | 0 | 0 | 1 | 3 |
| EI24    | 1 | 1 | 0 | 1 | 0 | 0 | 0 | 0 | 0 | 0 | 3 |
| CREB5   | 1 | 0 | 0 | 1 | 0 | 0 | 0 | 0 | 0 | 1 | 3 |
| CREB5   | 1 | 0 | 0 | 1 | 0 | 0 | 0 | 0 | 0 | 1 | 3 |
| CREB5   | 1 | 0 | 0 | 1 | 0 | 0 | 0 | 0 | 0 | 1 | 3 |

|                 |   |   |   |   |   |   |   |   |   |   |   |
|-----------------|---|---|---|---|---|---|---|---|---|---|---|
| <u>WTAP</u>     | 0 | 1 | 0 | 1 | 0 | 0 | 1 | 0 | 0 | 0 | 3 |
| <u>RNF14</u>    | 1 | 0 | 0 | 1 | 0 | 0 | 0 | 0 | 0 | 1 | 3 |
| <u>RNF14</u>    | 1 | 0 | 0 | 1 | 0 | 0 | 0 | 0 | 0 | 1 | 3 |
| <u>RNF7</u>     | 1 | 1 | 0 | 1 | 0 | 0 | 0 | 0 | 0 | 0 | 3 |
| <u>FNIP1</u>    | 0 | 1 | 0 | 1 | 0 | 0 | 0 | 0 | 0 | 1 | 3 |
| <u>CD59</u>     | 1 | 0 | 0 | 1 | 0 | 0 | 0 | 0 | 0 | 1 | 3 |
| <u>CD59</u>     | 1 | 0 | 0 | 1 | 0 | 0 | 0 | 0 | 0 | 1 | 3 |
| <u>CD59</u>     | 1 | 0 | 0 | 1 | 0 | 0 | 0 | 0 | 0 | 1 | 3 |
| <u>CD59</u>     | 1 | 0 | 0 | 1 | 0 | 0 | 0 | 0 | 0 | 1 | 3 |
| <u>CD59</u>     | 1 | 0 | 0 | 1 | 0 | 0 | 0 | 0 | 0 | 1 | 3 |
| <u>SDC3</u>     | 1 | 1 | 0 | 1 | 0 | 0 | 0 | 0 | 0 | 0 | 3 |
| <u>PHACTR2</u>  | 1 | 0 | 0 | 1 | 0 | 0 | 0 | 0 | 0 | 1 | 3 |
| <u>PHACTR2</u>  | 1 | 0 | 0 | 1 | 0 | 0 | 0 | 0 | 0 | 1 | 3 |
| <u>PHACTR2</u>  | 1 | 0 | 0 | 1 | 0 | 0 | 0 | 0 | 0 | 1 | 3 |
| <u>BCLAF1</u>   | 1 | 0 | 0 | 1 | 0 | 0 | 0 | 0 | 0 | 1 | 3 |
| <u>BCLAF1</u>   | 1 | 0 | 0 | 1 | 0 | 0 | 0 | 0 | 0 | 1 | 3 |
| <u>KIAA0232</u> | 0 | 1 | 0 | 1 | 0 | 0 | 0 | 0 | 0 | 1 | 3 |
| <u>MATR3</u>    | 1 | 1 | 0 | 1 | 0 | 0 | 0 | 0 | 0 | 0 | 3 |
| <u>MATR3</u>    | 1 | 0 | 0 | 1 | 0 | 0 | 1 | 0 | 0 | 0 | 3 |
| <u>BMS1</u>     | 0 | 1 | 0 | 1 | 0 | 0 | 0 | 0 | 1 | 0 | 3 |
| <u>SCRN1</u>    | 1 | 0 | 0 | 1 | 0 | 0 | 1 | 0 | 0 | 0 | 3 |
| <u>GIT2</u>     | 1 | 0 | 0 | 1 | 0 | 0 | 0 | 0 | 0 | 1 | 3 |
| <u>GIT2</u>     | 1 | 0 | 0 | 1 | 0 | 0 | 0 | 0 | 0 | 1 | 3 |
| <u>CDC2</u>     | 1 | 1 | 0 | 1 | 0 | 0 | 0 | 0 | 0 | 0 | 3 |
| <u>HEPH</u>     | 1 | 1 | 0 | 1 | 0 | 0 | 0 | 0 | 0 | 0 | 3 |
| <u>MFAP3L</u>   | 1 | 0 | 0 | 1 | 0 | 0 | 0 | 0 | 0 | 1 | 3 |
| <u>OSBPL2</u>   | 1 | 0 | 0 | 1 | 0 | 0 | 0 | 0 | 0 | 1 | 3 |
| <u>SMG7</u>     | 1 | 0 | 0 | 1 | 0 | 0 | 0 | 0 | 0 | 1 | 3 |
| <u>SMG7</u>     | 1 | 0 | 0 | 1 | 0 | 0 | 0 | 0 | 0 | 1 | 3 |
| <u>CDC25A</u>   | 1 | 0 | 0 | 1 | 0 | 0 | 0 | 0 | 0 | 1 | 3 |
| <u>SLC23A2</u>  | 1 | 0 | 0 | 1 | 0 | 0 | 0 | 0 | 0 | 1 | 3 |
| <u>REC8</u>     | 1 | 0 | 0 | 1 | 0 | 0 | 0 | 0 | 0 | 1 | 3 |
| <u>G3BP1</u>    | 1 | 0 | 0 | 0 | 0 | 0 | 1 | 1 | 0 | 0 | 3 |
| <u>MBNL2</u>    | 1 | 0 | 0 | 0 | 1 | 0 | 0 | 0 | 0 | 1 | 3 |
| <u>APPBP2</u>   | 1 | 1 | 0 | 0 | 0 | 0 | 1 | 0 | 0 | 0 | 3 |
| <u>TRIM3</u>    | 1 | 1 | 0 | 0 | 0 | 0 | 0 | 0 | 0 | 1 | 3 |
| <u>IVNS1ABP</u> | 1 | 0 | 0 | 0 | 0 | 0 | 0 | 0 | 1 | 1 | 3 |
| <u>POSTN</u>    | 1 | 1 | 0 | 0 | 0 | 0 | 1 | 0 | 0 | 0 | 3 |
| <u>TOB2</u>     | 1 | 1 | 0 | 0 | 0 | 0 | 1 | 0 | 0 | 0 | 3 |
| <u>ZNF266</u>   | 1 | 1 | 0 | 0 | 0 | 0 | 0 | 0 | 0 | 1 | 3 |
| <u>ZNF274</u>   | 1 | 0 | 0 | 0 | 0 | 0 | 1 | 0 | 0 | 1 | 3 |

|                  |   |   |   |   |   |   |   |   |   |   |   |
|------------------|---|---|---|---|---|---|---|---|---|---|---|
| <u>PDE10A</u>    | 1 | 1 | 0 | 0 | 0 | 0 | 0 | 0 | 0 | 1 | 3 |
| <u>AP3M2</u>     | 1 | 1 | 0 | 0 | 0 | 0 | 0 | 0 | 0 | 1 | 3 |
| <u>C10orf116</u> | 1 | 1 | 0 | 0 | 0 | 0 | 1 | 0 | 0 | 0 | 3 |
| <u>ERLIN2</u>    | 1 | 1 | 0 | 0 | 0 | 0 | 0 | 0 | 0 | 1 | 3 |
| <u>AKAP11</u>    | 1 | 1 | 0 | 0 | 0 | 0 | 1 | 0 | 0 | 0 | 3 |
| <u>OSBPL6</u>    | 1 | 1 | 0 | 0 | 0 | 0 | 0 | 0 | 0 | 1 | 3 |
| <u>SLC26A9</u>   | 1 | 1 | 0 | 0 | 0 | 0 | 0 | 0 | 0 | 1 | 3 |
| <u>SLC26A7</u>   | 1 | 1 | 0 | 0 | 0 | 0 | 0 | 0 | 0 | 1 | 3 |
| <u>ZNF573</u>    | 1 | 1 | 0 | 0 | 0 | 0 | 1 | 0 | 0 | 0 | 3 |
| <u>NUDT16</u>    | 1 | 1 | 0 | 0 | 0 | 0 | 1 | 0 | 0 | 0 | 3 |
| <u>CTNNB1</u>    | 1 | 1 | 0 | 0 | 0 | 0 | 1 | 0 | 0 | 0 | 3 |
| <u>TXLNB</u>     | 1 | 1 | 0 | 0 | 0 | 0 | 1 | 0 | 0 | 0 | 3 |
| <u>SYNPO2</u>    | 1 | 1 | 0 | 0 | 0 | 0 | 0 | 0 | 0 | 1 | 3 |
| <u>ZNF675</u>    | 1 | 1 | 0 | 0 | 0 | 0 | 1 | 0 | 0 | 0 | 3 |
| <u>AGL</u>       | 1 | 1 | 0 | 0 | 0 | 0 | 0 | 0 | 0 | 1 | 3 |
| <u>ACSF3</u>     | 1 | 1 | 0 | 0 | 0 | 0 | 0 | 0 | 0 | 1 | 3 |
| <u>ZNF626</u>    | 1 | 1 | 0 | 0 | 0 | 0 | 0 | 0 | 0 | 1 | 3 |
| <u>EMR1</u>      | 1 | 1 | 0 | 0 | 0 | 0 | 1 | 0 | 0 | 0 | 3 |
| <u>EVII</u>      | 1 | 0 | 0 | 0 | 0 | 0 | 1 | 0 | 1 | 0 | 3 |
| <u>USP33</u>     | 1 | 0 | 0 | 0 | 1 | 0 | 0 | 0 | 0 | 1 | 3 |
| <u>SMG1</u>      | 1 | 1 | 0 | 0 | 0 | 0 | 1 | 0 | 0 | 0 | 3 |
| <u>NCOA6</u>     | 1 | 1 | 0 | 0 | 0 | 0 | 1 | 0 | 0 | 0 | 3 |
| <u>RHOBTB2</u>   | 1 | 0 | 0 | 0 | 0 | 0 | 1 | 1 | 0 | 0 | 3 |
| <u>MGA</u>       | 1 | 0 | 0 | 0 | 0 | 0 | 1 | 0 | 0 | 1 | 3 |
| <u>BICD2</u>     | 1 | 1 | 0 | 0 | 1 | 0 | 0 | 0 | 0 | 0 | 3 |
| <u>C20orf103</u> | 1 | 1 | 0 | 0 | 0 | 0 | 1 | 0 | 0 | 0 | 3 |
| <u>MTHFD1L</u>   | 1 | 1 | 0 | 0 | 0 | 0 | 1 | 0 | 0 | 0 | 3 |
| <u>IBTK</u>      | 1 | 0 | 0 | 0 | 0 | 0 | 1 | 0 | 0 | 1 | 3 |
| <u>RAI14</u>     | 1 | 0 | 0 | 0 | 0 | 0 | 1 | 0 | 0 | 1 | 3 |
| <u>FBXL5</u>     | 1 | 1 | 0 | 0 | 0 | 0 | 0 | 0 | 0 | 1 | 3 |
| <u>LCE2B</u>     | 1 | 1 | 0 | 0 | 0 | 0 | 1 | 0 | 0 | 0 | 3 |
| <u>AP3M1</u>     | 1 | 1 | 0 | 0 | 0 | 0 | 0 | 0 | 0 | 1 | 3 |
| <u>AP3M1</u>     | 1 | 0 | 0 | 0 | 0 | 0 | 1 | 0 | 0 | 1 | 3 |
| <u>ZNF326</u>    | 1 | 1 | 0 | 0 | 0 | 0 | 0 | 0 | 0 | 1 | 3 |
| <u>C3orf23</u>   | 1 | 1 | 0 | 0 | 0 | 0 | 0 | 0 | 0 | 1 | 3 |
| <u>PURG</u>      | 1 | 1 | 0 | 0 | 0 | 0 | 1 | 0 | 0 | 0 | 3 |
| <u>HMGCS1</u>    | 1 | 1 | 0 | 0 | 0 | 0 | 0 | 0 | 0 | 1 | 3 |
| <u>RAB37</u>     | 1 | 1 | 0 | 0 | 0 | 0 | 1 | 0 | 0 | 0 | 3 |
| <u>ITGA4</u>     | 1 | 1 | 0 | 0 | 0 | 0 | 1 | 0 | 0 | 0 | 3 |
| <u>ITGAL</u>     | 1 | 1 | 0 | 0 | 0 | 0 | 1 | 0 | 0 | 0 | 3 |
| <u>KALI</u>      | 1 | 1 | 0 | 0 | 0 | 0 | 1 | 0 | 0 | 0 | 3 |

|                   |   |   |   |   |   |   |   |   |   |   |   |
|-------------------|---|---|---|---|---|---|---|---|---|---|---|
| <u>FLG2</u>       | 1 | 1 | 0 | 0 | 0 | 0 | 1 | 0 | 0 | 0 | 3 |
| <u>ZNF793</u>     | 1 | 1 | 0 | 0 | 0 | 0 | 1 | 0 | 0 | 0 | 3 |
| <u>MECP2</u>      | 1 | 1 | 0 | 0 | 0 | 0 | 0 | 0 | 0 | 1 | 3 |
| <u>MET</u>        | 1 | 1 | 0 | 0 | 0 | 0 | 0 | 0 | 0 | 1 | 3 |
| <u>MET</u>        | 1 | 0 | 1 | 0 | 0 | 0 | 0 | 0 | 0 | 1 | 3 |
| <u>NPHP1</u>      | 1 | 0 | 0 | 0 | 0 | 0 | 1 | 0 | 0 | 1 | 3 |
| <u>SLC11A2</u>    | 1 | 1 | 0 | 0 | 0 | 0 | 1 | 0 | 0 | 0 | 3 |
| <u>ATP2B3</u>     | 1 | 1 | 0 | 0 | 0 | 0 | 0 | 0 | 0 | 1 | 3 |
| <u>GOLGA7</u>     | 1 | 1 | 0 | 0 | 0 | 0 | 0 | 0 | 0 | 1 | 3 |
| <u>CCDC41</u>     | 1 | 1 | 0 | 0 | 0 | 0 | 0 | 0 | 0 | 1 | 3 |
| <u>ZDHHC2</u>     | 1 | 1 | 0 | 0 | 0 | 0 | 1 | 0 | 0 | 0 | 3 |
| <u>NCKIPSD</u>    | 1 | 1 | 0 | 0 | 0 | 0 | 1 | 0 | 0 | 0 | 3 |
| <u>PDHA2</u>      | 1 | 1 | 0 | 0 | 0 | 0 | 1 | 0 | 0 | 0 | 3 |
| <u>PHKA1</u>      | 1 | 1 | 0 | 0 | 0 | 0 | 0 | 0 | 0 | 1 | 3 |
| <u>SERPINB13</u>  | 1 | 1 | 0 | 0 | 0 | 0 | 1 | 0 | 0 | 0 | 3 |
| <u>PML</u>        | 1 | 1 | 0 | 0 | 0 | 0 | 0 | 0 | 0 | 1 | 3 |
| <u>C21orf91</u>   | 1 | 1 | 0 | 0 | 0 | 0 | 0 | 0 | 0 | 1 | 3 |
| <u>GFOD1</u>      | 1 | 1 | 0 | 0 | 0 | 0 | 1 | 0 | 0 | 0 | 3 |
| <u>EXOC6</u>      | 1 | 1 | 0 | 0 | 0 | 0 | 1 | 0 | 0 | 0 | 3 |
| <u>CROT</u>       | 1 | 1 | 0 | 0 | 0 | 0 | 1 | 0 | 0 | 0 | 3 |
| <u>ZNF562</u>     | 1 | 1 | 0 | 0 | 0 | 0 | 0 | 0 | 0 | 1 | 3 |
| <u>PID1</u>       | 1 | 1 | 0 | 0 | 0 | 0 | 1 | 0 | 0 | 0 | 3 |
| <u>FBXO34</u>     | 1 | 1 | 0 | 0 | 0 | 0 | 0 | 0 | 0 | 1 | 3 |
| <u>SLC38A4</u>    | 1 | 0 | 0 | 0 | 0 | 0 | 1 | 0 | 0 | 1 | 3 |
| <u>BSDC1</u>      | 1 | 1 | 0 | 0 | 0 | 0 | 1 | 0 | 0 | 0 | 3 |
| <u>ARMC4</u>      | 1 | 1 | 0 | 0 | 0 | 0 | 1 | 0 | 0 | 0 | 3 |
| <u>DALRD3</u>     | 1 | 0 | 0 | 0 | 1 | 0 | 1 | 0 | 0 | 0 | 3 |
| <u>CSGALNACT2</u> | 1 | 1 | 0 | 0 | 0 | 0 | 1 | 0 | 0 | 0 | 3 |
| <u>PRCP</u>       | 1 | 1 | 0 | 0 | 0 | 0 | 0 | 0 | 0 | 1 | 3 |
| <u>ETNK1</u>      | 1 | 1 | 0 | 0 | 0 | 0 | 0 | 0 | 0 | 1 | 3 |
| <u>MBNL3</u>      | 1 | 1 | 0 | 0 | 0 | 0 | 0 | 0 | 0 | 1 | 3 |
| <u>FAM54B</u>     | 1 | 1 | 0 | 0 | 0 | 0 | 0 | 0 | 0 | 1 | 3 |
| <u>C8orf44</u>    | 1 | 1 | 0 | 0 | 0 | 0 | 1 | 0 | 0 | 0 | 3 |
| <u>ZC3HAV1</u>    | 1 | 1 | 0 | 0 | 0 | 0 | 0 | 0 | 0 | 1 | 3 |
| <u>CASC5</u>      | 1 | 1 | 0 | 0 | 0 | 0 | 0 | 0 | 0 | 1 | 3 |
| <u>CASC5</u>      | 1 | 0 | 0 | 0 | 0 | 0 | 1 | 0 | 0 | 1 | 3 |
| <u>PAK7</u>       | 1 | 0 | 0 | 0 | 0 | 0 | 1 | 0 | 0 | 1 | 3 |
| <u>LYRM1</u>      | 1 | 1 | 0 | 0 | 0 | 0 | 0 | 0 | 0 | 1 | 3 |
| <u>PHTF2</u>      | 1 | 1 | 0 | 0 | 0 | 0 | 0 | 0 | 0 | 1 | 3 |
| <u>PTGER3</u>     | 1 | 1 | 0 | 0 | 0 | 0 | 0 | 0 | 0 | 1 | 3 |
| <u>TMCC3</u>      | 1 | 1 | 0 | 0 | 0 | 0 | 1 | 0 | 0 | 0 | 3 |

|                 |   |   |   |   |   |   |   |   |   |   |   |
|-----------------|---|---|---|---|---|---|---|---|---|---|---|
| <u>GATAD2B</u>  | 1 | 1 | 0 | 0 | 0 | 0 | 1 | 0 | 0 | 0 | 3 |
| <u>RABGGTB</u>  | 1 | 1 | 0 | 0 | 0 | 0 | 1 | 0 | 0 | 0 | 3 |
| <u>ZNF350</u>   | 1 | 1 | 0 | 0 | 0 | 0 | 1 | 0 | 0 | 0 | 3 |
| <u>RFC3</u>     | 1 | 1 | 0 | 0 | 0 | 0 | 0 | 0 | 0 | 1 | 3 |
| <u>NDRG4</u>    | 1 | 1 | 0 | 0 | 0 | 0 | 0 | 0 | 0 | 1 | 3 |
| <u>GPBP1</u>    | 1 | 0 | 0 | 0 | 1 | 0 | 0 | 0 | 0 | 1 | 3 |
| <u>RAPH1</u>    | 1 | 1 | 0 | 0 | 0 | 0 | 0 | 0 | 0 | 1 | 3 |
| <u>SSX5</u>     | 1 | 0 | 0 | 0 | 0 | 0 | 1 | 1 | 0 | 0 | 3 |
| <u>C5</u>       | 1 | 1 | 0 | 0 | 0 | 0 | 1 | 0 | 0 | 0 | 3 |
| <u>USH2A</u>    | 1 | 1 | 0 | 0 | 0 | 0 | 0 | 0 | 0 | 1 | 3 |
| <u>UTRN</u>     | 1 | 1 | 0 | 0 | 0 | 0 | 1 | 0 | 0 | 0 | 3 |
| <u>VDR</u>      | 1 | 0 | 0 | 0 | 0 | 0 | 1 | 0 | 0 | 1 | 3 |
| <u>ZNF37A</u>   | 1 | 1 | 0 | 0 | 0 | 0 | 0 | 0 | 0 | 1 | 3 |
| <u>ZNF85</u>    | 1 | 1 | 0 | 0 | 0 | 0 | 1 | 0 | 0 | 0 | 3 |
| <u>ZNF135</u>   | 1 | 0 | 0 | 0 | 0 | 0 | 0 | 1 | 0 | 1 | 3 |
| <u>ZNF200</u>   | 1 | 1 | 0 | 0 | 0 | 0 | 0 | 0 | 0 | 1 | 3 |
| <u>CACNB2</u>   | 1 | 0 | 0 | 0 | 1 | 0 | 0 | 0 | 0 | 1 | 3 |
| <u>CACNB4</u>   | 1 | 1 | 0 | 0 | 0 | 0 | 0 | 0 | 0 | 1 | 3 |
| <u>CACNB4</u>   | 1 | 0 | 0 | 0 | 0 | 0 | 1 | 0 | 0 | 1 | 3 |
| <u>ZNF655</u>   | 1 | 1 | 0 | 0 | 0 | 0 | 0 | 0 | 0 | 1 | 3 |
| <u>ZNF655</u>   | 1 | 0 | 0 | 0 | 1 | 0 | 0 | 0 | 0 | 1 | 3 |
| <u>GSTCD</u>    | 1 | 1 | 0 | 0 | 0 | 0 | 0 | 0 | 0 | 1 | 3 |
| <u>MMRN2</u>    | 1 | 1 | 0 | 0 | 0 | 0 | 1 | 0 | 0 | 0 | 3 |
| <u>C13orf18</u> | 1 | 0 | 0 | 0 | 0 | 0 | 1 | 0 | 0 | 1 | 3 |
| <u>TMEM22</u>   | 1 | 1 | 0 | 0 | 0 | 0 | 0 | 0 | 0 | 1 | 3 |
| <u>SLC38A1</u>  | 1 | 1 | 0 | 0 | 0 | 0 | 0 | 0 | 0 | 1 | 3 |
| <u>CAMK2D</u>   | 1 | 1 | 0 | 0 | 0 | 0 | 0 | 0 | 0 | 1 | 3 |
| <u>CCDC62</u>   | 1 | 1 | 0 | 0 | 0 | 0 | 0 | 0 | 0 | 1 | 3 |
| <u>PSRC1</u>    | 1 | 1 | 0 | 0 | 0 | 0 | 0 | 0 | 0 | 1 | 3 |
| <u>ORAI1</u>    | 1 | 0 | 0 | 0 | 0 | 0 | 1 | 1 | 0 | 0 | 3 |
| <u>CNTNAP4</u>  | 1 | 1 | 0 | 0 | 0 | 0 | 0 | 0 | 0 | 1 | 3 |
| <u>DIXDC1</u>   | 1 | 1 | 0 | 0 | 0 | 0 | 0 | 0 | 0 | 1 | 3 |
| <u>RUNX1</u>    | 1 | 1 | 0 | 0 | 0 | 0 | 0 | 0 | 0 | 1 | 3 |
| <u>STX16</u>    | 1 | 1 | 0 | 0 | 0 | 0 | 1 | 0 | 0 | 0 | 3 |
| <u>B4GALT4</u>  | 1 | 1 | 0 | 0 | 0 | 0 | 0 | 0 | 0 | 1 | 3 |
| <u>B4GALT4</u>  | 1 | 0 | 0 | 0 | 0 | 0 | 1 | 0 | 0 | 1 | 3 |
| <u>APLN</u>     | 1 | 1 | 0 | 0 | 0 | 0 | 1 | 0 | 0 | 0 | 3 |
| <u>SYNJ1</u>    | 1 | 1 | 0 | 0 | 0 | 0 | 0 | 0 | 0 | 1 | 3 |
| <u>SYNJ1</u>    | 1 | 0 | 0 | 0 | 0 | 0 | 1 | 0 | 0 | 1 | 3 |
| <u>KRIT1</u>    | 1 | 1 | 0 | 0 | 0 | 0 | 0 | 0 | 0 | 1 | 3 |
| <u>KLHL13</u>   | 1 | 1 | 0 | 0 | 0 | 0 | 1 | 0 | 0 | 0 | 3 |

|          |   |   |   |   |   |   |   |   |   |   |   |
|----------|---|---|---|---|---|---|---|---|---|---|---|
| ZNF468   | 1 | 1 | 0 | 0 | 0 | 0 | 0 | 0 | 0 | 1 | 3 |
| UBE2M    | 1 | 1 | 0 | 0 | 0 | 0 | 1 | 0 | 0 | 0 | 3 |
| MTA1     | 1 | 1 | 0 | 0 | 0 | 0 | 1 | 0 | 0 | 0 | 3 |
| CBFA2T2  | 1 | 1 | 0 | 0 | 0 | 0 | 0 | 0 | 0 | 1 | 3 |
| BTF3L4   | 1 | 1 | 0 | 0 | 0 | 0 | 1 | 0 | 0 | 0 | 3 |
| VAPB     | 1 | 1 | 0 | 0 | 0 | 0 | 1 | 0 | 0 | 0 | 3 |
| NRXN3    | 1 | 0 | 0 | 0 | 1 | 0 | 0 | 0 | 0 | 1 | 3 |
| ZRANB2   | 1 | 1 | 0 | 0 | 0 | 0 | 0 | 0 | 0 | 1 | 3 |
| QKI      | 1 | 1 | 0 | 0 | 0 | 0 | 0 | 0 | 0 | 1 | 3 |
| MPHOSPH1 | 1 | 1 | 0 | 0 | 0 | 0 | 1 | 0 | 0 | 0 | 3 |
| RNF14    | 1 | 0 | 0 | 0 | 0 | 0 | 1 | 0 | 0 | 1 | 3 |
| GIT2     | 1 | 1 | 0 | 0 | 0 | 0 | 0 | 0 | 0 | 1 | 3 |
| PIGK     | 0 | 1 | 0 | 0 | 0 | 0 | 1 | 0 | 0 | 1 | 3 |
| UST      | 0 | 1 | 0 | 0 | 0 | 0 | 1 | 0 | 0 | 1 | 3 |
| NAMPT    | 0 | 1 | 0 | 0 | 0 | 0 | 1 | 0 | 0 | 1 | 3 |
| YAF2     | 0 | 1 | 0 | 0 | 0 | 0 | 1 | 0 | 0 | 1 | 3 |
| SORBS3   | 0 | 1 | 0 | 0 | 0 | 0 | 1 | 0 | 0 | 1 | 3 |
| STX6     | 0 | 1 | 0 | 0 | 0 | 0 | 1 | 0 | 0 | 1 | 3 |
| IGSF6    | 0 | 1 | 0 | 0 | 0 | 0 | 1 | 0 | 0 | 1 | 3 |
| NET1     | 0 | 1 | 0 | 0 | 0 | 0 | 1 | 0 | 0 | 1 | 3 |
| DNAJA2   | 0 | 1 | 0 | 0 | 0 | 0 | 1 | 0 | 0 | 1 | 3 |
| MAEA     | 0 | 1 | 0 | 0 | 0 | 0 | 1 | 0 | 0 | 1 | 3 |
| MARCH6   | 0 | 1 | 0 | 0 | 0 | 0 | 1 | 0 | 0 | 1 | 3 |
| BPNT1    | 0 | 1 | 0 | 0 | 0 | 0 | 1 | 0 | 0 | 1 | 3 |
| SCML2    | 0 | 1 | 0 | 0 | 0 | 0 | 1 | 0 | 0 | 1 | 3 |
| CDIPT    | 0 | 1 | 0 | 0 | 0 | 0 | 1 | 0 | 0 | 1 | 3 |
| ARIH2    | 0 | 1 | 0 | 0 | 0 | 0 | 1 | 0 | 0 | 1 | 3 |
| OLFM1    | 0 | 1 | 0 | 0 | 0 | 0 | 1 | 0 | 0 | 1 | 3 |
| COG5     | 0 | 1 | 0 | 0 | 0 | 0 | 1 | 0 | 0 | 1 | 3 |
| CHERP    | 0 | 1 | 0 | 0 | 0 | 0 | 1 | 0 | 0 | 1 | 3 |
| RPP30    | 0 | 1 | 0 | 0 | 0 | 0 | 1 | 0 | 0 | 1 | 3 |
| SLC34A2  | 0 | 1 | 0 | 0 | 0 | 0 | 1 | 0 | 0 | 1 | 3 |
| RBCK1    | 0 | 1 | 0 | 0 | 0 | 0 | 1 | 0 | 0 | 1 | 3 |
| IGF2BP3  | 0 | 1 | 0 | 0 | 0 | 0 | 1 | 0 | 0 | 1 | 3 |
| SCGB1D2  | 0 | 1 | 0 | 0 | 0 | 0 | 1 | 0 | 0 | 1 | 3 |
| SCGB1D1  | 0 | 1 | 0 | 0 | 0 | 0 | 1 | 0 | 0 | 1 | 3 |
| RAI1     | 0 | 1 | 0 | 0 | 0 | 0 | 1 | 0 | 0 | 1 | 3 |
| GRAP     | 0 | 1 | 0 | 0 | 0 | 0 | 1 | 0 | 0 | 1 | 3 |
| IQGAP2   | 0 | 1 | 0 | 0 | 0 | 0 | 1 | 0 | 0 | 1 | 3 |
| WASF3    | 0 | 1 | 0 | 0 | 0 | 0 | 1 | 0 | 0 | 1 | 3 |
| FGL2     | 0 | 1 | 0 | 0 | 0 | 0 | 1 | 0 | 0 | 1 | 3 |

|                 |   |   |   |   |   |   |   |   |   |   |   |
|-----------------|---|---|---|---|---|---|---|---|---|---|---|
| <u>LILRA1</u>   | 0 | 1 | 0 | 0 | 0 | 0 | 1 | 0 | 0 | 1 | 3 |
| <u>SLC35D2</u>  | 0 | 1 | 0 | 0 | 0 | 0 | 1 | 0 | 0 | 1 | 3 |
| <u>CHD1</u>     | 0 | 1 | 0 | 0 | 0 | 0 | 1 | 0 | 0 | 1 | 3 |
| <u>CEP110</u>   | 0 | 1 | 0 | 0 | 0 | 0 | 1 | 0 | 0 | 1 | 3 |
| <u>C10orf10</u> | 0 | 1 | 0 | 0 | 0 | 0 | 1 | 0 | 0 | 1 | 3 |
| <u>TMEM115</u>  | 0 | 1 | 0 | 0 | 0 | 0 | 1 | 0 | 0 | 1 | 3 |
| <u>HHLA2</u>    | 0 | 1 | 0 | 0 | 0 | 0 | 1 | 0 | 0 | 1 | 3 |
| <u>LDB3</u>     | 0 | 1 | 0 | 0 | 0 | 0 | 1 | 0 | 0 | 1 | 3 |
| <u>SOX21</u>    | 0 | 1 | 0 | 0 | 0 | 0 | 1 | 0 | 0 | 1 | 3 |
| <u>BAZ1A</u>    | 0 | 1 | 0 | 0 | 0 | 0 | 1 | 0 | 0 | 1 | 3 |
| <u>MAP4K5</u>   | 0 | 1 | 0 | 0 | 0 | 0 | 1 | 0 | 1 | 0 | 3 |
| <u>CHM</u>      | 0 | 1 | 0 | 0 | 0 | 0 | 1 | 0 | 0 | 1 | 3 |
| <u>RASSF8</u>   | 0 | 1 | 0 | 0 | 0 | 0 | 1 | 0 | 0 | 1 | 3 |
| <u>PRKCDBP</u>  | 0 | 1 | 0 | 0 | 0 | 0 | 1 | 0 | 0 | 1 | 3 |
| <u>GLCC11</u>   | 0 | 1 | 0 | 0 | 0 | 0 | 1 | 0 | 0 | 1 | 3 |
| <u>CHRM5</u>    | 0 | 1 | 0 | 0 | 0 | 0 | 1 | 0 | 0 | 1 | 3 |
| <u>CHRNA3</u>   | 0 | 1 | 0 | 0 | 0 | 0 | 1 | 0 | 0 | 1 | 3 |
| <u>SLC35A4</u>  | 0 | 1 | 0 | 0 | 0 | 0 | 1 | 0 | 0 | 1 | 3 |
| <u>TMEM200A</u> | 0 | 1 | 0 | 0 | 0 | 0 | 1 | 0 | 0 | 1 | 3 |
| <u>C1QTNF2</u>  | 0 | 1 | 0 | 0 | 0 | 0 | 1 | 0 | 0 | 1 | 3 |
| <u>ZNF501</u>   | 0 | 1 | 0 | 0 | 0 | 0 | 1 | 0 | 0 | 1 | 3 |
| <u>DIRC1</u>    | 0 | 1 | 0 | 0 | 0 | 0 | 1 | 0 | 0 | 1 | 3 |
| <u>OLFM3</u>    | 0 | 1 | 0 | 0 | 0 | 0 | 1 | 0 | 0 | 1 | 3 |
| <u>EXOSC6</u>   | 0 | 1 | 0 | 0 | 0 | 0 | 1 | 0 | 0 | 1 | 3 |
| <u>ZNF511</u>   | 0 | 1 | 0 | 0 | 0 | 0 | 1 | 0 | 0 | 1 | 3 |
| <u>PIK3AP1</u>  | 0 | 1 | 0 | 0 | 0 | 0 | 1 | 0 | 0 | 1 | 3 |
| <u>ANKRD22</u>  | 0 | 1 | 0 | 0 | 0 | 0 | 1 | 0 | 0 | 1 | 3 |
| <u>CLIC2</u>    | 0 | 1 | 0 | 0 | 0 | 0 | 1 | 0 | 0 | 1 | 3 |
| <u>CYP2R1</u>   | 0 | 1 | 0 | 0 | 0 | 0 | 1 | 0 | 0 | 1 | 3 |
| <u>TMEM132D</u> | 0 | 1 | 0 | 0 | 0 | 0 | 1 | 0 | 0 | 1 | 3 |
| <u>SP7</u>      | 0 | 1 | 0 | 0 | 0 | 0 | 1 | 0 | 0 | 1 | 3 |
| <u>PPIL5</u>    | 0 | 1 | 0 | 0 | 0 | 0 | 1 | 0 | 1 | 0 | 3 |
| <u>ISCA2</u>    | 0 | 1 | 0 | 0 | 0 | 0 | 1 | 0 | 0 | 1 | 3 |
| <u>CCR1</u>     | 0 | 1 | 0 | 0 | 0 | 0 | 1 | 0 | 0 | 1 | 3 |
| <u>C16orf63</u> | 0 | 1 | 0 | 0 | 0 | 0 | 1 | 0 | 0 | 1 | 3 |
| <u>C16orf55</u> | 0 | 1 | 0 | 0 | 0 | 0 | 1 | 0 | 0 | 1 | 3 |
| <u>ADH1B</u>    | 0 | 1 | 0 | 0 | 0 | 0 | 1 | 0 | 0 | 1 | 3 |
| <u>RNF19B</u>   | 0 | 1 | 0 | 0 | 0 | 0 | 0 | 0 | 1 | 1 | 3 |
| <u>TATDN3</u>   | 0 | 1 | 0 | 0 | 0 | 0 | 1 | 0 | 0 | 1 | 3 |
| <u>ZNF831</u>   | 0 | 1 | 0 | 0 | 0 | 0 | 1 | 0 | 0 | 1 | 3 |
| <u>COL4A5</u>   | 0 | 1 | 0 | 0 | 0 | 0 | 1 | 0 | 0 | 1 | 3 |



|                      |   |   |   |   |   |   |   |   |   |   |   |
|----------------------|---|---|---|---|---|---|---|---|---|---|---|
| <u>COL10A1</u>       | 0 | 1 | 0 | 0 | 0 | 0 | 1 | 0 | 0 | 1 | 3 |
| <u>ICA1L</u>         | 0 | 1 | 0 | 0 | 0 | 0 | 1 | 0 | 0 | 1 | 3 |
| <u>DKFZp667G2110</u> | 0 | 1 | 0 | 0 | 0 | 0 | 1 | 0 | 0 | 1 | 3 |
| <u>ENPP6</u>         | 0 | 1 | 0 | 0 | 0 | 0 | 1 | 1 | 0 | 0 | 3 |
| <u>LOC136242</u>     | 0 | 1 | 0 | 0 | 0 | 0 | 1 | 0 | 0 | 1 | 3 |
| <u>ZNF572</u>        | 0 | 1 | 0 | 0 | 0 | 0 | 1 | 0 | 0 | 1 | 3 |
| <u>HDX</u>           | 0 | 1 | 0 | 0 | 0 | 0 | 1 | 0 | 0 | 1 | 3 |
| <u>TRPM6</u>         | 0 | 1 | 0 | 0 | 0 | 0 | 1 | 0 | 0 | 1 | 3 |
| <u>TRUB1</u>         | 0 | 1 | 0 | 0 | 0 | 0 | 1 | 0 | 0 | 1 | 3 |
| <u>LYSMD4</u>        | 0 | 1 | 0 | 0 | 0 | 0 | 1 | 0 | 0 | 1 | 3 |
| <u>FAM81A</u>        | 0 | 1 | 0 | 0 | 0 | 0 | 1 | 0 | 0 | 1 | 3 |
| <u>ZFP90</u>         | 0 | 1 | 0 | 0 | 0 | 0 | 1 | 0 | 0 | 1 | 3 |
| <u>UNC45B</u>        | 0 | 1 | 0 | 0 | 0 | 0 | 1 | 0 | 0 | 1 | 3 |
| <u>ZNF480</u>        | 0 | 1 | 0 | 0 | 0 | 0 | 1 | 0 | 0 | 1 | 3 |
| <u>CSTF3</u>         | 0 | 1 | 0 | 0 | 0 | 0 | 1 | 0 | 0 | 1 | 3 |
| <u>ZNF582</u>        | 0 | 1 | 0 | 0 | 0 | 0 | 1 | 0 | 0 | 1 | 3 |
| <u>ZNF681</u>        | 0 | 1 | 0 | 0 | 0 | 0 | 1 | 0 | 0 | 1 | 3 |
| <u>SLC35F3</u>       | 0 | 1 | 0 | 0 | 0 | 0 | 1 | 0 | 0 | 1 | 3 |
| <u>HFE2</u>          | 0 | 1 | 0 | 0 | 0 | 0 | 1 | 0 | 0 | 1 | 3 |
| <u>C1orf76</u>       | 0 | 1 | 0 | 0 | 0 | 0 | 1 | 0 | 0 | 1 | 3 |
| <u>MFSD4</u>         | 0 | 1 | 0 | 0 | 0 | 0 | 1 | 0 | 0 | 1 | 3 |
| <u>SLC30A7</u>       | 0 | 1 | 0 | 0 | 0 | 0 | 1 | 0 | 0 | 1 | 3 |
| <u>DNAJB7</u>        | 0 | 1 | 0 | 0 | 0 | 0 | 1 | 0 | 0 | 1 | 3 |
| <u>SMYD1</u>         | 0 | 1 | 0 | 0 | 0 | 0 | 1 | 0 | 0 | 1 | 3 |
| <u>ALS2CR13</u>      | 0 | 1 | 0 | 0 | 0 | 0 | 1 | 0 | 0 | 1 | 3 |
| <u>CTSE</u>          | 0 | 1 | 0 | 0 | 0 | 0 | 1 | 0 | 0 | 1 | 3 |
| <u>BTLA</u>          | 0 | 1 | 0 | 0 | 0 | 0 | 1 | 0 | 0 | 1 | 3 |
| <u>ZCWPW2</u>        | 0 | 1 | 0 | 0 | 0 | 0 | 1 | 0 | 0 | 1 | 3 |
| <u>CMTM8</u>         | 0 | 1 | 0 | 0 | 0 | 0 | 1 | 0 | 0 | 1 | 3 |
| <u>DAB2IP</u>        | 0 | 1 | 0 | 0 | 0 | 0 | 1 | 0 | 1 | 0 | 3 |
| <u>SPINK5L3</u>      | 0 | 1 | 0 | 0 | 0 | 0 | 1 | 0 | 0 | 1 | 3 |
| <u>TMEM161B</u>      | 0 | 1 | 0 | 0 | 0 | 0 | 1 | 0 | 0 | 1 | 3 |
| <u>CYBB</u>          | 0 | 1 | 0 | 0 | 0 | 0 | 1 | 0 | 0 | 1 | 3 |
| <u>ARSK</u>          | 0 | 1 | 0 | 0 | 0 | 0 | 1 | 0 | 0 | 1 | 3 |
| <u>FAM81B</u>        | 0 | 1 | 0 | 0 | 0 | 0 | 1 | 0 | 0 | 1 | 3 |
| <u>CYP1B1</u>        | 0 | 1 | 0 | 0 | 0 | 0 | 1 | 0 | 0 | 1 | 3 |
| <u>AMOTL1</u>        | 0 | 1 | 0 | 0 | 0 | 0 | 1 | 0 | 0 | 1 | 3 |
| <u>RDH10</u>         | 0 | 1 | 0 | 0 | 0 | 0 | 1 | 0 | 1 | 0 | 3 |
| <u>MOSPD2</u>        | 0 | 1 | 0 | 0 | 0 | 0 | 1 | 0 | 0 | 1 | 3 |
| <u>CCDC67</u>        | 0 | 1 | 0 | 0 | 0 | 0 | 1 | 0 | 0 | 1 | 3 |

|                  |   |   |   |   |   |   |   |   |   |   |   |
|------------------|---|---|---|---|---|---|---|---|---|---|---|
| <u>TMTC3</u>     | 0 | 1 | 0 | 0 | 0 | 0 | 1 | 0 | 0 | 1 | 3 |
| <u>ZNF564</u>    | 0 | 1 | 0 | 0 | 0 | 0 | 1 | 1 | 0 | 0 | 3 |
| <u>ZNF100</u>    | 0 | 1 | 0 | 0 | 0 | 0 | 1 | 0 | 0 | 1 | 3 |
| <u>BBS12</u>     | 0 | 1 | 0 | 0 | 0 | 0 | 1 | 0 | 0 | 1 | 3 |
| <u>DCLK2</u>     | 0 | 1 | 0 | 0 | 0 | 0 | 1 | 0 | 0 | 1 | 3 |
| <u>DCP2</u>      | 0 | 1 | 0 | 0 | 0 | 0 | 1 | 0 | 0 | 1 | 3 |
| <u>LIX1</u>      | 0 | 1 | 0 | 0 | 0 | 0 | 1 | 0 | 0 | 1 | 3 |
| <u>BMPER</u>     | 0 | 1 | 0 | 0 | 0 | 0 | 1 | 0 | 0 | 1 | 3 |
| <u>ADAMTS19</u>  | 0 | 1 | 0 | 0 | 0 | 0 | 1 | 0 | 0 | 1 | 3 |
| <u>DSC2</u>      | 0 | 1 | 0 | 0 | 0 | 0 | 1 | 0 | 0 | 1 | 3 |
| <u>E2F2</u>      | 0 | 1 | 0 | 0 | 0 | 0 | 1 | 0 | 0 | 1 | 3 |
| <u>EDN3</u>      | 0 | 1 | 0 | 0 | 0 | 0 | 1 | 0 | 0 | 1 | 3 |
| <u>CELSR3</u>    | 0 | 1 | 0 | 0 | 0 | 0 | 1 | 0 | 0 | 1 | 3 |
| <u>EHHADH</u>    | 0 | 1 | 0 | 0 | 0 | 0 | 1 | 0 | 0 | 1 | 3 |
| <u>ZNF585A</u>   | 0 | 1 | 0 | 0 | 0 | 0 | 1 | 0 | 0 | 1 | 3 |
| <u>ELN</u>       | 0 | 1 | 0 | 0 | 0 | 0 | 1 | 0 | 0 | 1 | 3 |
| <u>LOC201229</u> | 0 | 1 | 0 | 0 | 0 | 0 | 1 | 0 | 0 | 1 | 3 |
| <u>RAB12</u>     | 0 | 1 | 0 | 0 | 0 | 0 | 1 | 1 | 0 | 0 | 3 |
| <u>FAM116A</u>   | 0 | 1 | 0 | 0 | 0 | 0 | 1 | 0 | 0 | 1 | 3 |
| <u>EMX2</u>      | 0 | 1 | 0 | 0 | 0 | 0 | 1 | 0 | 0 | 1 | 3 |
| <u>AIM1</u>      | 0 | 1 | 0 | 0 | 0 | 0 | 1 | 0 | 0 | 1 | 3 |
| <u>C9orf72</u>   | 0 | 1 | 0 | 0 | 0 | 0 | 1 | 0 | 0 | 1 | 3 |
| <u>NRK</u>       | 0 | 1 | 0 | 0 | 0 | 0 | 1 | 0 | 0 | 1 | 3 |
| <u>STOM</u>      | 0 | 1 | 0 | 0 | 0 | 0 | 1 | 0 | 0 | 1 | 3 |
| <u>ERF</u>       | 0 | 1 | 0 | 0 | 0 | 0 | 1 | 0 | 0 | 1 | 3 |
| <u>EXTL2</u>     | 0 | 1 | 0 | 0 | 0 | 0 | 1 | 0 | 0 | 1 | 3 |
| <u>FABP2</u>     | 0 | 1 | 0 | 0 | 0 | 0 | 1 | 0 | 0 | 1 | 3 |
| <u>FABP7</u>     | 0 | 1 | 0 | 0 | 0 | 0 | 1 | 0 | 0 | 1 | 3 |
| <u>ATAD3C</u>    | 0 | 1 | 0 | 0 | 0 | 0 | 1 | 0 | 0 | 1 | 3 |
| <u>ZNF25</u>     | 0 | 1 | 0 | 0 | 0 | 0 | 1 | 0 | 0 | 1 | 3 |
| <u>PATL1</u>     | 0 | 1 | 0 | 0 | 0 | 0 | 1 | 0 | 0 | 1 | 3 |
| <u>ORAOV1</u>    | 0 | 1 | 0 | 0 | 0 | 0 | 1 | 0 | 0 | 1 | 3 |
| <u>KIF6</u>      | 0 | 1 | 0 | 0 | 0 | 0 | 1 | 0 | 0 | 1 | 3 |
| <u>AOF1</u>      | 0 | 1 | 0 | 0 | 0 | 0 | 1 | 0 | 0 | 1 | 3 |
| <u>FCGRT</u>     | 0 | 1 | 0 | 0 | 0 | 0 | 1 | 0 | 0 | 1 | 3 |
| <u>KCTD20</u>    | 0 | 1 | 0 | 0 | 0 | 0 | 1 | 0 | 0 | 1 | 3 |
| <u>FECH</u>      | 0 | 1 | 0 | 0 | 0 | 0 | 1 | 0 | 0 | 1 | 3 |
| <u>ALDH3A2</u>   | 0 | 1 | 0 | 0 | 0 | 0 | 1 | 0 | 0 | 1 | 3 |
| <u>CASC3</u>     | 0 | 1 | 0 | 0 | 0 | 0 | 1 | 0 | 0 | 1 | 3 |
| <u>PLEKHA6</u>   | 0 | 1 | 0 | 0 | 0 | 0 | 1 | 0 | 0 | 1 | 3 |
| <u>INPP5F</u>    | 0 | 1 | 0 | 0 | 0 | 0 | 1 | 0 | 0 | 1 | 3 |

|                     |   |   |   |   |   |   |   |   |   |   |   |
|---------------------|---|---|---|---|---|---|---|---|---|---|---|
| <u>MLXIP</u>        | 0 | 1 | 0 | 0 | 0 | 0 | 1 | 0 | 0 | 1 | 3 |
| <u>CLSTN1</u>       | 0 | 1 | 0 | 0 | 0 | 0 | 1 | 0 | 0 | 1 | 3 |
| <u>CD93</u>         | 0 | 1 | 0 | 0 | 0 | 0 | 1 | 0 | 0 | 1 | 3 |
| <u>RAB18</u>        | 0 | 1 | 0 | 0 | 0 | 0 | 1 | 0 | 0 | 1 | 3 |
| <u>RPIA</u>         | 0 | 1 | 0 | 0 | 0 | 0 | 1 | 0 | 0 | 1 | 3 |
| <u>RP4-691N24.1</u> | 0 | 1 | 0 | 0 | 0 | 0 | 1 | 0 | 0 | 1 | 3 |
| <u>UNC13A</u>       | 0 | 1 | 0 | 0 | 0 | 0 | 1 | 0 | 0 | 1 | 3 |
| <u>ZNF609</u>       | 0 | 1 | 0 | 0 | 0 | 0 | 1 | 0 | 0 | 1 | 3 |
| <u>MYCBP2</u>       | 0 | 1 | 0 | 0 | 0 | 0 | 1 | 0 | 0 | 1 | 3 |
| <u>ANKLE2</u>       | 0 | 1 | 0 | 0 | 0 | 0 | 1 | 0 | 0 | 1 | 3 |
| <u>MLANA</u>        | 0 | 1 | 0 | 0 | 0 | 0 | 1 | 0 | 0 | 1 | 3 |
| <u>LPIN1</u>        | 0 | 1 | 0 | 0 | 0 | 0 | 1 | 0 | 0 | 1 | 3 |
| <u>DIP2A</u>        | 0 | 1 | 0 | 0 | 0 | 0 | 0 | 0 | 1 | 1 | 3 |
| <u>MESDC2</u>       | 0 | 1 | 0 | 0 | 0 | 0 | 1 | 1 | 0 | 0 | 3 |
| <u>ARHGEF9</u>      | 0 | 1 | 0 | 0 | 0 | 0 | 1 | 0 | 0 | 1 | 3 |
| <u>PLCB1</u>        | 0 | 1 | 0 | 0 | 0 | 0 | 1 | 0 | 0 | 1 | 3 |
| <u>FLT4</u>         | 0 | 1 | 0 | 0 | 0 | 0 | 1 | 0 | 1 | 0 | 3 |
| <u>CLEC16A</u>      | 0 | 1 | 0 | 0 | 0 | 0 | 1 | 0 | 0 | 1 | 3 |
| <u>KIF13B</u>       | 0 | 1 | 0 | 0 | 0 | 0 | 1 | 0 | 0 | 1 | 3 |
| <u>C22orf9</u>      | 0 | 1 | 0 | 0 | 0 | 0 | 1 | 0 | 0 | 1 | 3 |
| <u>FMR1</u>         | 0 | 1 | 0 | 0 | 0 | 0 | 1 | 0 | 0 | 1 | 3 |
| <u>RPGRIP1L</u>     | 0 | 1 | 0 | 0 | 0 | 0 | 1 | 0 | 0 | 1 | 3 |
| <u>DMN</u>          | 0 | 1 | 0 | 0 | 0 | 0 | 1 | 0 | 0 | 1 | 3 |
| <u>SMCHD1</u>       | 0 | 1 | 0 | 0 | 0 | 0 | 1 | 0 | 0 | 1 | 3 |
| <u>KIAA0841</u>     | 0 | 1 | 0 | 0 | 0 | 0 | 1 | 0 | 0 | 1 | 3 |
| <u>NUDCD3</u>       | 0 | 1 | 0 | 0 | 0 | 0 | 1 | 0 | 0 | 1 | 3 |
| <u>SIRT3</u>        | 0 | 1 | 0 | 0 | 0 | 0 | 1 | 0 | 0 | 1 | 3 |
| <u>ABCB10</u>       | 0 | 1 | 0 | 0 | 0 | 0 | 1 | 0 | 0 | 1 | 3 |
| <u>SEC11A</u>       | 0 | 1 | 0 | 0 | 0 | 0 | 1 | 0 | 0 | 1 | 3 |
| <u>TTC9</u>         | 0 | 1 | 0 | 0 | 0 | 0 | 1 | 0 | 0 | 1 | 3 |
| <u>RPL13A</u>       | 0 | 1 | 0 | 0 | 0 | 0 | 1 | 0 | 0 | 1 | 3 |
| <u>TTC33</u>        | 0 | 1 | 0 | 0 | 0 | 0 | 1 | 0 | 0 | 1 | 3 |
| <u>TSPAN12</u>      | 0 | 1 | 0 | 0 | 0 | 0 | 1 | 0 | 0 | 1 | 3 |
| <u>TMEM50A</u>      | 0 | 1 | 0 | 0 | 0 | 0 | 1 | 0 | 0 | 1 | 3 |
| <u>SSBP2</u>        | 0 | 1 | 0 | 0 | 0 | 0 | 1 | 0 | 0 | 1 | 3 |
| <u>C9orf5</u>       | 0 | 1 | 0 | 0 | 0 | 0 | 1 | 0 | 0 | 1 | 3 |
| <u>OSBP2</u>        | 0 | 1 | 0 | 0 | 0 | 0 | 1 | 0 | 0 | 1 | 3 |
| <u>FLRT2</u>        | 0 | 1 | 0 | 0 | 0 | 0 | 1 | 0 | 0 | 1 | 3 |
| <u>FXN</u>          | 0 | 1 | 0 | 0 | 0 | 0 | 1 | 0 | 0 | 1 | 3 |
| <u>SLC17A8</u>      | 0 | 1 | 0 | 0 | 0 | 0 | 1 | 0 | 0 | 1 | 3 |
| <u>ADAM2</u>        | 0 | 1 | 0 | 0 | 0 | 0 | 1 | 0 | 0 | 1 | 3 |

|                 |   |   |   |   |   |   |   |   |   |   |   |
|-----------------|---|---|---|---|---|---|---|---|---|---|---|
| <u>FNDC5</u>    | 0 | 1 | 0 | 0 | 0 | 0 | 1 | 0 | 0 | 1 | 3 |
| <u>EBF3</u>     | 0 | 1 | 0 | 0 | 0 | 0 | 1 | 0 | 0 | 1 | 3 |
| <u>MSRB3</u>    | 0 | 1 | 0 | 0 | 0 | 0 | 1 | 0 | 0 | 1 | 3 |
| <u>FLJ25778</u> | 0 | 1 | 0 | 0 | 0 | 0 | 1 | 0 | 0 | 1 | 3 |
| <u>LRRC57</u>   | 0 | 1 | 0 | 0 | 0 | 0 | 1 | 0 | 0 | 1 | 3 |
| <u>COL29A1</u>  | 0 | 1 | 0 | 0 | 0 | 0 | 1 | 0 | 0 | 1 | 3 |
| <u>GABRB3</u>   | 0 | 1 | 0 | 0 | 0 | 0 | 1 | 0 | 0 | 1 | 3 |
| <u>MAP7D2</u>   | 0 | 1 | 0 | 0 | 0 | 0 | 1 | 0 | 0 | 1 | 3 |
| <u>RIPK5</u>    | 0 | 1 | 0 | 0 | 0 | 0 | 1 | 0 | 0 | 1 | 3 |
| <u>GCA</u>      | 0 | 1 | 0 | 0 | 0 | 0 | 1 | 0 | 0 | 1 | 3 |
| <u>HIGD1A</u>   | 0 | 1 | 0 | 0 | 0 | 0 | 1 | 0 | 0 | 1 | 3 |
| <u>FGFR1OP2</u> | 0 | 1 | 0 | 0 | 0 | 0 | 1 | 0 | 0 | 1 | 3 |
| <u>GAS1</u>     | 0 | 1 | 0 | 0 | 0 | 0 | 1 | 0 | 0 | 1 | 3 |
| <u>AMD1</u>     | 0 | 1 | 0 | 0 | 0 | 0 | 1 | 0 | 0 | 1 | 3 |
| <u>FBXO2</u>    | 0 | 1 | 0 | 0 | 0 | 0 | 1 | 0 | 0 | 1 | 3 |
| <u>FBXO25</u>   | 0 | 1 | 0 | 0 | 0 | 0 | 1 | 1 | 0 | 0 | 3 |
| <u>MYCBP</u>    | 0 | 1 | 0 | 0 | 0 | 0 | 1 | 0 | 0 | 1 | 3 |
| <u>GBAS</u>     | 0 | 1 | 0 | 0 | 0 | 0 | 1 | 0 | 0 | 1 | 3 |
| <u>TIMM10</u>   | 0 | 1 | 0 | 0 | 0 | 0 | 1 | 0 | 0 | 1 | 3 |
| <u>MYEOV</u>    | 0 | 1 | 0 | 0 | 0 | 0 | 1 | 0 | 0 | 1 | 3 |
| <u>NAPIL5</u>   | 0 | 1 | 0 | 0 | 0 | 0 | 1 | 0 | 0 | 1 | 3 |
| <u>GHR</u>      | 0 | 1 | 0 | 0 | 0 | 0 | 1 | 0 | 0 | 1 | 3 |
| <u>RANBP6</u>   | 0 | 1 | 0 | 0 | 0 | 0 | 1 | 0 | 0 | 1 | 3 |
| <u>NBEA</u>     | 0 | 1 | 0 | 0 | 0 | 0 | 1 | 0 | 0 | 1 | 3 |
| <u>RNF11</u>    | 0 | 1 | 0 | 0 | 0 | 0 | 1 | 0 | 0 | 1 | 3 |
| <u>GJA3</u>     | 0 | 1 | 0 | 0 | 0 | 0 | 1 | 0 | 0 | 1 | 3 |
| <u>C1orf107</u> | 0 | 1 | 0 | 0 | 0 | 0 | 1 | 0 | 0 | 1 | 3 |
| <u>STAU2</u>    | 0 | 1 | 0 | 0 | 0 | 0 | 1 | 0 | 0 | 1 | 3 |
| <u>BHLHB5</u>   | 0 | 1 | 0 | 0 | 0 | 0 | 1 | 0 | 1 | 0 | 3 |
| <u>GLI2</u>     | 0 | 1 | 0 | 0 | 0 | 0 | 1 | 0 | 0 | 1 | 3 |
| <u>EML4</u>     | 0 | 1 | 0 | 0 | 0 | 0 | 1 | 0 | 0 | 1 | 3 |
| <u>GMFB</u>     | 0 | 1 | 0 | 0 | 0 | 0 | 1 | 0 | 0 | 1 | 3 |
| <u>GNAI1</u>    | 0 | 1 | 0 | 0 | 0 | 0 | 1 | 0 | 0 | 1 | 3 |
| <u>GNAI3</u>    | 0 | 1 | 0 | 0 | 0 | 0 | 1 | 0 | 0 | 1 | 3 |
| <u>GNAZ</u>     | 0 | 1 | 0 | 0 | 0 | 0 | 1 | 0 | 0 | 1 | 3 |
| <u>GNRHR</u>    | 0 | 1 | 0 | 0 | 0 | 0 | 1 | 0 | 0 | 1 | 3 |
| <u>GPD1</u>     | 0 | 1 | 0 | 0 | 0 | 0 | 1 | 0 | 0 | 1 | 3 |
| <u>P4HA3</u>    | 0 | 1 | 0 | 0 | 0 | 0 | 1 | 0 | 0 | 1 | 3 |
| <u>ANKRD52</u>  | 0 | 1 | 0 | 0 | 0 | 0 | 1 | 0 | 0 | 1 | 3 |
| <u>PIGW</u>     | 0 | 1 | 0 | 0 | 0 | 0 | 1 | 0 | 0 | 1 | 3 |
| <u>GDPD1</u>    | 0 | 1 | 0 | 0 | 0 | 0 | 1 | 0 | 0 | 1 | 3 |

|                  |   |   |   |   |   |   |   |   |   |   |   |
|------------------|---|---|---|---|---|---|---|---|---|---|---|
| <u>ZIK1</u>      | 0 | 1 | 0 | 0 | 0 | 0 | 1 | 0 | 0 | 1 | 3 |
| <u>ZNF283</u>    | 0 | 1 | 0 | 0 | 0 | 0 | 1 | 0 | 0 | 1 | 3 |
| <u>FLJ40235</u>  | 0 | 1 | 0 | 0 | 0 | 0 | 1 | 0 | 0 | 1 | 3 |
| <u>ZNF493</u>    | 0 | 1 | 0 | 0 | 0 | 0 | 1 | 0 | 0 | 1 | 3 |
| <u>C3orf64</u>   | 0 | 1 | 0 | 0 | 0 | 0 | 1 | 0 | 0 | 1 | 3 |
| <u>LOC285382</u> | 0 | 1 | 0 | 0 | 0 | 0 | 1 | 0 | 0 | 1 | 3 |
| <u>WDR21B</u>    | 0 | 1 | 0 | 0 | 0 | 0 | 1 | 0 | 0 | 1 | 3 |
| <u>GRK6</u>      | 0 | 1 | 0 | 0 | 0 | 0 | 1 | 0 | 0 | 1 | 3 |
| <u>GRB14</u>     | 0 | 1 | 0 | 0 | 0 | 0 | 1 | 0 | 0 | 1 | 3 |
| <u>GRIA3</u>     | 0 | 1 | 0 | 0 | 0 | 0 | 1 | 0 | 0 | 1 | 3 |
| <u>GRID1</u>     | 0 | 1 | 0 | 0 | 0 | 0 | 1 | 0 | 0 | 1 | 3 |
| <u>GRM7</u>      | 0 | 1 | 0 | 0 | 0 | 0 | 1 | 0 | 0 | 1 | 3 |
| <u>CXCL3</u>     | 0 | 1 | 0 | 0 | 0 | 0 | 1 | 0 | 0 | 1 | 3 |
| <u>GRSF1</u>     | 0 | 1 | 0 | 0 | 0 | 0 | 1 | 0 | 0 | 1 | 3 |
| <u>GTF2I</u>     | 0 | 1 | 0 | 0 | 0 | 0 | 1 | 0 | 0 | 1 | 3 |
| <u>CARD10</u>    | 0 | 1 | 0 | 0 | 0 | 0 | 1 | 0 | 0 | 1 | 3 |
| <u>GPR171</u>    | 0 | 1 | 0 | 0 | 0 | 0 | 1 | 0 | 0 | 1 | 3 |
| <u>NME7</u>      | 0 | 1 | 0 | 0 | 0 | 0 | 1 | 0 | 1 | 0 | 3 |
| <u>H1FO</u>      | 0 | 1 | 0 | 0 | 0 | 0 | 1 | 0 | 0 | 1 | 3 |
| <u>VSX1</u>      | 0 | 1 | 0 | 0 | 0 | 0 | 1 | 0 | 0 | 1 | 3 |
| <u>KCNIP2</u>    | 0 | 1 | 0 | 0 | 0 | 0 | 1 | 0 | 0 | 1 | 3 |
| <u>HGF</u>       | 0 | 1 | 0 | 0 | 0 | 0 | 1 | 0 | 0 | 1 | 3 |
| <u>MNX1</u>      | 0 | 1 | 0 | 0 | 0 | 0 | 1 | 0 | 0 | 1 | 3 |
| <u>HMGB1</u>     | 0 | 1 | 0 | 0 | 0 | 0 | 1 | 0 | 0 | 1 | 3 |
| <u>HNRPH1</u>    | 0 | 1 | 0 | 0 | 0 | 0 | 1 | 0 | 0 | 1 | 3 |
| <u>HOXB8</u>     | 0 | 1 | 0 | 0 | 0 | 0 | 1 | 0 | 0 | 1 | 3 |
| <u>HOXB9</u>     | 0 | 1 | 0 | 0 | 0 | 0 | 1 | 0 | 0 | 1 | 3 |
| <u>APEH</u>      | 0 | 1 | 0 | 0 | 0 | 0 | 1 | 0 | 1 | 0 | 3 |
| <u>HSPA5</u>     | 0 | 1 | 0 | 0 | 0 | 0 | 1 | 0 | 0 | 1 | 3 |
| <u>APLP2</u>     | 0 | 1 | 0 | 0 | 0 | 0 | 1 | 0 | 0 | 1 | 3 |
| <u>FOXP2</u>     | 0 | 1 | 0 | 0 | 0 | 0 | 1 | 0 | 0 | 1 | 3 |
| <u>HTR1F</u>     | 0 | 1 | 0 | 0 | 0 | 0 | 1 | 0 | 0 | 1 | 3 |
| <u>HTR7</u>      | 0 | 1 | 0 | 0 | 0 | 0 | 1 | 0 | 0 | 1 | 3 |
| <u>CLEC4D</u>    | 0 | 1 | 0 | 0 | 0 | 0 | 1 | 0 | 0 | 1 | 3 |
| <u>FAM19A2</u>   | 0 | 1 | 0 | 0 | 0 | 0 | 1 | 0 | 0 | 1 | 3 |
| <u>ZNF260</u>    | 0 | 1 | 0 | 0 | 0 | 0 | 1 | 0 | 0 | 1 | 3 |
| <u>SLC35D3</u>   | 0 | 1 | 0 | 0 | 0 | 0 | 1 | 0 | 0 | 1 | 3 |
| <u>IDS</u>       | 0 | 1 | 0 | 0 | 0 | 0 | 1 | 0 | 0 | 1 | 3 |
| <u>LOC342897</u> | 0 | 1 | 0 | 0 | 0 | 0 | 1 | 0 | 0 | 1 | 3 |
| <u>IFRD1</u>     | 0 | 1 | 0 | 0 | 0 | 0 | 1 | 0 | 0 | 1 | 3 |
| <u>RILPL1</u>    | 0 | 1 | 0 | 0 | 0 | 0 | 1 | 0 | 0 | 1 | 3 |

|                  |   |   |   |   |   |   |   |   |   |   |   |
|------------------|---|---|---|---|---|---|---|---|---|---|---|
| <u>IL12RB2</u>   | 0 | 1 | 0 | 0 | 0 | 0 | 1 | 0 | 0 | 1 | 3 |
| <u>FOXK2</u>     | 0 | 1 | 0 | 0 | 0 | 0 | 1 | 0 | 0 | 1 | 3 |
| <u>INSIG1</u>    | 0 | 1 | 0 | 0 | 0 | 0 | 1 | 0 | 0 | 1 | 3 |
| <u>ITGB3</u>     | 0 | 1 | 0 | 0 | 0 | 0 | 1 | 0 | 0 | 1 | 3 |
| <u>ITPKB</u>     | 0 | 1 | 0 | 0 | 0 | 0 | 1 | 0 | 0 | 1 | 3 |
| <u>TEPP</u>      | 0 | 1 | 0 | 0 | 0 | 0 | 1 | 0 | 0 | 1 | 3 |
| <u>KCNC4</u>     | 0 | 1 | 0 | 0 | 0 | 0 | 1 | 0 | 1 | 0 | 3 |
| <u>FAM73A</u>    | 0 | 1 | 0 | 0 | 0 | 0 | 1 | 0 | 0 | 1 | 3 |
| <u>RBM43</u>     | 0 | 1 | 0 | 0 | 0 | 0 | 1 | 0 | 0 | 1 | 3 |
| <u>RAB15</u>     | 0 | 1 | 0 | 0 | 0 | 0 | 1 | 0 | 0 | 1 | 3 |
| <u>KCNJ12</u>    | 0 | 1 | 0 | 0 | 0 | 0 | 1 | 0 | 0 | 1 | 3 |
| <u>KCNJ13</u>    | 0 | 1 | 0 | 0 | 0 | 0 | 1 | 0 | 0 | 1 | 3 |
| <u>KCNMB1</u>    | 0 | 1 | 0 | 0 | 0 | 0 | 1 | 0 | 0 | 1 | 3 |
| <u>KRT2</u>      | 0 | 1 | 0 | 0 | 0 | 0 | 1 | 0 | 0 | 1 | 3 |
| <u>KRT5</u>      | 0 | 1 | 0 | 0 | 0 | 0 | 1 | 0 | 0 | 1 | 3 |
| <u>RGS9BP</u>    | 0 | 1 | 0 | 0 | 0 | 0 | 1 | 0 | 0 | 1 | 3 |
| <u>ZNF470</u>    | 0 | 1 | 0 | 0 | 0 | 0 | 1 | 0 | 0 | 1 | 3 |
| <u>FLJ34931</u>  | 0 | 1 | 0 | 0 | 0 | 0 | 1 | 0 | 0 | 1 | 3 |
| <u>FLJ41603</u>  | 0 | 1 | 0 | 0 | 0 | 0 | 1 | 0 | 0 | 1 | 3 |
| <u>SAMD5</u>     | 0 | 1 | 0 | 0 | 0 | 0 | 1 | 0 | 0 | 1 | 3 |
| <u>RBM12B</u>    | 0 | 1 | 0 | 0 | 0 | 0 | 1 | 0 | 0 | 1 | 3 |
| <u>ZNF321</u>    | 0 | 1 | 0 | 0 | 0 | 0 | 1 | 0 | 0 | 1 | 3 |
| <u>LMO7</u>      | 0 | 1 | 0 | 0 | 0 | 0 | 1 | 0 | 0 | 1 | 3 |
| <u>LMX1A</u>     | 0 | 1 | 0 | 0 | 0 | 0 | 1 | 0 | 0 | 1 | 3 |
| <u>KLHL31</u>    | 0 | 1 | 0 | 0 | 0 | 0 | 1 | 0 | 0 | 1 | 3 |
| <u>LRP2</u>      | 0 | 1 | 0 | 0 | 0 | 0 | 1 | 0 | 0 | 1 | 3 |
| <u>MARCKS</u>    | 0 | 1 | 0 | 0 | 0 | 0 | 1 | 0 | 0 | 1 | 3 |
| <u>ACCN2</u>     | 0 | 1 | 0 | 0 | 0 | 0 | 1 | 0 | 0 | 1 | 3 |
| <u>MAGEA1</u>    | 0 | 1 | 0 | 0 | 0 | 0 | 1 | 0 | 0 | 1 | 3 |
| <u>MAGEA5</u>    | 0 | 1 | 0 | 0 | 0 | 0 | 1 | 0 | 0 | 1 | 3 |
| <u>ARSB</u>      | 0 | 1 | 0 | 0 | 0 | 0 | 1 | 0 | 0 | 1 | 3 |
| <u>MAGEB2</u>    | 0 | 1 | 0 | 0 | 0 | 0 | 1 | 0 | 0 | 1 | 3 |
| <u>MAGEB3</u>    | 0 | 1 | 0 | 0 | 0 | 0 | 1 | 0 | 0 | 1 | 3 |
| <u>MAGEB4</u>    | 0 | 1 | 0 | 0 | 0 | 0 | 1 | 0 | 0 | 1 | 3 |
| <u>MCL1</u>      | 0 | 1 | 0 | 0 | 0 | 0 | 1 | 0 | 0 | 1 | 3 |
| <u>ME1</u>       | 0 | 1 | 0 | 0 | 0 | 0 | 1 | 0 | 0 | 1 | 3 |
| <u>METTL1</u>    | 0 | 1 | 0 | 0 | 0 | 0 | 1 | 0 | 0 | 1 | 3 |
| <u>MITF</u>      | 0 | 1 | 0 | 0 | 0 | 0 | 1 | 0 | 0 | 1 | 3 |
| <u>MLLT6</u>     | 0 | 1 | 0 | 0 | 0 | 0 | 1 | 0 | 1 | 0 | 3 |
| <u>MMP1</u>      | 0 | 1 | 0 | 0 | 0 | 0 | 1 | 0 | 0 | 1 | 3 |
| <u>LOC441108</u> | 0 | 1 | 0 | 0 | 0 | 0 | 1 | 0 | 0 | 1 | 3 |

|                 |   |   |   |   |   |   |   |   |   |   |   |
|-----------------|---|---|---|---|---|---|---|---|---|---|---|
| <u>FAM47C</u>   | 0 | 1 | 0 | 0 | 0 | 0 | 1 | 0 | 0 | 1 | 3 |
| <u>MYO1C</u>    | 0 | 1 | 0 | 0 | 0 | 0 | 1 | 0 | 0 | 1 | 3 |
| <u>NAB1</u>     | 0 | 1 | 0 | 0 | 0 | 0 | 1 | 0 | 0 | 1 | 3 |
| <u>NDUFAB1</u>  | 0 | 1 | 0 | 0 | 0 | 0 | 1 | 0 | 1 | 0 | 3 |
| <u>NMT1</u>     | 0 | 1 | 0 | 0 | 0 | 0 | 1 | 0 | 0 | 1 | 3 |
| <u>NT5E</u>     | 0 | 1 | 0 | 0 | 0 | 0 | 1 | 0 | 0 | 1 | 3 |
| <u>ATP2B4</u>   | 0 | 1 | 0 | 0 | 0 | 0 | 1 | 0 | 0 | 1 | 3 |
| <u>OAT</u>      | 0 | 1 | 0 | 0 | 0 | 0 | 1 | 0 | 0 | 1 | 3 |
| <u>CLDN20</u>   | 0 | 1 | 0 | 0 | 0 | 0 | 1 | 0 | 0 | 1 | 3 |
| <u>OXTR</u>     | 0 | 1 | 0 | 0 | 0 | 0 | 1 | 0 | 0 | 1 | 3 |
| <u>PAFAH1B1</u> | 0 | 1 | 0 | 0 | 0 | 0 | 1 | 0 | 0 | 1 | 3 |
| <u>SLC45A1</u>  | 0 | 1 | 0 | 0 | 0 | 0 | 1 | 0 | 0 | 1 | 3 |
| <u>PAPPA</u>    | 0 | 1 | 0 | 0 | 0 | 0 | 1 | 1 | 0 | 0 | 3 |
| <u>HDGFRP3</u>  | 0 | 1 | 0 | 0 | 0 | 0 | 1 | 0 | 1 | 0 | 3 |
| <u>PDCL</u>     | 0 | 1 | 0 | 0 | 0 | 0 | 1 | 0 | 0 | 1 | 3 |
| <u>IMPG2</u>    | 0 | 1 | 0 | 0 | 0 | 0 | 1 | 0 | 0 | 1 | 3 |
| <u>NMD3</u>     | 0 | 1 | 0 | 0 | 0 | 0 | 1 | 0 | 0 | 1 | 3 |
| <u>CUTC</u>     | 0 | 1 | 0 | 0 | 0 | 0 | 1 | 0 | 1 | 0 | 3 |
| <u>RNFT1</u>    | 0 | 1 | 0 | 0 | 0 | 0 | 1 | 0 | 0 | 1 | 3 |
| <u>INSIG2</u>   | 0 | 1 | 0 | 0 | 0 | 0 | 1 | 0 | 0 | 1 | 3 |
| <u>HSD17B12</u> | 0 | 1 | 0 | 0 | 0 | 0 | 1 | 0 | 0 | 1 | 3 |
| <u>HSD17B11</u> | 0 | 1 | 0 | 0 | 0 | 0 | 1 | 0 | 0 | 1 | 3 |
| <u>PCTK2</u>    | 0 | 1 | 0 | 0 | 0 | 0 | 1 | 0 | 0 | 1 | 3 |
| <u>CHCHD8</u>   | 0 | 1 | 0 | 0 | 0 | 0 | 1 | 1 | 0 | 0 | 3 |
| <u>TXNDC3</u>   | 0 | 1 | 0 | 0 | 0 | 0 | 1 | 0 | 0 | 1 | 3 |
| <u>PDCD2</u>    | 0 | 1 | 0 | 0 | 0 | 0 | 1 | 0 | 0 | 1 | 3 |
| <u>ZNF589</u>   | 0 | 1 | 0 | 0 | 0 | 0 | 1 | 0 | 0 | 1 | 3 |
| <u>SNX9</u>     | 0 | 1 | 0 | 0 | 0 | 0 | 1 | 0 | 0 | 1 | 3 |
| <u>CTDSPL2</u>  | 0 | 1 | 0 | 0 | 0 | 0 | 1 | 0 | 0 | 1 | 3 |
| <u>PDE1B</u>    | 0 | 1 | 0 | 0 | 0 | 0 | 1 | 0 | 0 | 1 | 3 |
| <u>PPHLN1</u>   | 0 | 1 | 0 | 0 | 0 | 0 | 1 | 0 | 0 | 1 | 3 |
| <u>PEX5L</u>    | 0 | 1 | 0 | 0 | 0 | 0 | 0 | 0 | 1 | 1 | 3 |
| <u>RAB6B</u>    | 0 | 1 | 0 | 0 | 0 | 0 | 1 | 0 | 0 | 1 | 3 |
| <u>PDGFRB</u>   | 0 | 1 | 0 | 0 | 0 | 0 | 1 | 0 | 0 | 1 | 3 |
| <u>PPIL1</u>    | 0 | 1 | 0 | 0 | 0 | 0 | 1 | 0 | 0 | 1 | 3 |
| <u>GPRC5B</u>   | 0 | 1 | 0 | 0 | 0 | 0 | 1 | 0 | 0 | 1 | 3 |
| <u>RAB23</u>    | 0 | 1 | 0 | 0 | 0 | 0 | 1 | 0 | 0 | 1 | 3 |
| <u>ERAP1</u>    | 0 | 1 | 0 | 0 | 0 | 0 | 1 | 0 | 0 | 1 | 3 |
| <u>ATP5G3</u>   | 0 | 1 | 0 | 0 | 0 | 0 | 1 | 0 | 0 | 1 | 3 |
| <u>PEX1</u>     | 0 | 1 | 0 | 0 | 0 | 0 | 1 | 0 | 0 | 1 | 3 |
| <u>PFKFB2</u>   | 0 | 1 | 0 | 0 | 0 | 0 | 1 | 0 | 0 | 1 | 3 |

|                  |   |   |   |   |   |   |   |   |   |   |   |
|------------------|---|---|---|---|---|---|---|---|---|---|---|
| <u>PFKFB4</u>    | 0 | 1 | 0 | 0 | 0 | 0 | 1 | 0 | 0 | 1 | 3 |
| <u>PHF2</u>      | 0 | 1 | 0 | 0 | 0 | 0 | 1 | 0 | 0 | 1 | 3 |
| <u>PIK3R1</u>    | 0 | 1 | 0 | 0 | 0 | 0 | 1 | 0 | 0 | 1 | 3 |
| <u>PITPNA</u>    | 0 | 1 | 0 | 0 | 0 | 0 | 1 | 0 | 0 | 1 | 3 |
| <u>PLCB4</u>     | 0 | 1 | 0 | 0 | 0 | 0 | 1 | 0 | 1 | 0 | 3 |
| <u>CLIC6</u>     | 0 | 1 | 0 | 0 | 0 | 0 | 1 | 0 | 0 | 1 | 3 |
| <u>POLR2D</u>    | 0 | 1 | 0 | 0 | 0 | 0 | 1 | 0 | 0 | 1 | 3 |
| <u>ANKIB1</u>    | 0 | 1 | 0 | 0 | 0 | 0 | 0 | 0 | 1 | 1 | 3 |
| <u>DGCR8</u>     | 0 | 1 | 0 | 0 | 0 | 0 | 1 | 1 | 0 | 0 | 3 |
| <u>APBB1IP</u>   | 0 | 1 | 0 | 0 | 0 | 0 | 1 | 0 | 0 | 1 | 3 |
| <u>POU2F2</u>    | 0 | 1 | 0 | 0 | 0 | 0 | 1 | 0 | 0 | 1 | 3 |
| <u>MRPL50</u>    | 0 | 1 | 0 | 0 | 0 | 0 | 1 | 0 | 0 | 1 | 3 |
| <u>TOMM7</u>     | 0 | 1 | 0 | 0 | 0 | 0 | 1 | 0 | 0 | 1 | 3 |
| <u>SGTB</u>      | 0 | 1 | 0 | 0 | 0 | 0 | 1 | 0 | 0 | 1 | 3 |
| <u>ATRX</u>      | 0 | 1 | 0 | 0 | 0 | 0 | 1 | 0 | 0 | 1 | 3 |
| <u>FAM63B</u>    | 0 | 1 | 0 | 0 | 0 | 0 | 1 | 0 | 0 | 1 | 3 |
| <u>MED1</u>      | 0 | 1 | 0 | 0 | 0 | 0 | 1 | 0 | 0 | 1 | 3 |
| <u>KIF1A</u>     | 0 | 1 | 0 | 0 | 0 | 0 | 1 | 0 | 0 | 1 | 3 |
| <u>SLC6A20</u>   | 0 | 1 | 0 | 0 | 0 | 0 | 1 | 0 | 0 | 1 | 3 |
| <u>TMED9</u>     | 0 | 1 | 0 | 0 | 0 | 0 | 1 | 0 | 0 | 1 | 3 |
| <u>DNAJB12</u>   | 0 | 1 | 0 | 0 | 0 | 0 | 1 | 0 | 0 | 1 | 3 |
| <u>MBTD1</u>     | 0 | 1 | 0 | 0 | 0 | 0 | 1 | 0 | 0 | 1 | 3 |
| <u>FAM29A</u>    | 0 | 1 | 0 | 0 | 0 | 0 | 1 | 0 | 0 | 1 | 3 |
| <u>KLHL28</u>    | 0 | 1 | 0 | 0 | 0 | 0 | 1 | 0 | 0 | 1 | 3 |
| <u>TRPM7</u>     | 0 | 1 | 0 | 0 | 0 | 0 | 1 | 0 | 0 | 1 | 3 |
| <u>GIN1</u>      | 0 | 1 | 0 | 0 | 0 | 0 | 1 | 0 | 0 | 1 | 3 |
| <u>VPS13C</u>    | 0 | 1 | 0 | 0 | 0 | 0 | 1 | 0 | 0 | 1 | 3 |
| <u>SYTL2</u>     | 0 | 1 | 0 | 0 | 0 | 0 | 1 | 0 | 0 | 1 | 3 |
| <u>DEF8</u>      | 0 | 1 | 0 | 0 | 0 | 0 | 1 | 1 | 0 | 0 | 3 |
| <u>HEATR2</u>    | 0 | 1 | 0 | 0 | 0 | 0 | 1 | 0 | 0 | 1 | 3 |
| <u>IMPAD1</u>    | 0 | 1 | 0 | 0 | 0 | 0 | 1 | 0 | 0 | 1 | 3 |
| <u>COMMD8</u>    | 0 | 1 | 0 | 0 | 0 | 0 | 1 | 0 | 0 | 1 | 3 |
| <u>C1orf56</u>   | 0 | 1 | 0 | 0 | 0 | 0 | 1 | 0 | 0 | 1 | 3 |
| <u>ACSM5</u>     | 0 | 1 | 0 | 0 | 0 | 0 | 1 | 0 | 0 | 1 | 3 |
| <u>ZNF770</u>    | 0 | 1 | 0 | 0 | 0 | 0 | 1 | 0 | 0 | 1 | 3 |
| <u>HERC6</u>     | 0 | 1 | 0 | 0 | 0 | 0 | 1 | 0 | 0 | 1 | 3 |
| <u>C14orf119</u> | 0 | 1 | 0 | 0 | 0 | 0 | 1 | 0 | 0 | 1 | 3 |
| <u>PLEKHB2</u>   | 0 | 1 | 0 | 0 | 0 | 0 | 1 | 0 | 0 | 1 | 3 |
| <u>C7orf42</u>   | 0 | 1 | 0 | 0 | 0 | 0 | 0 | 0 | 1 | 1 | 3 |
| <u>WDR60</u>     | 0 | 1 | 0 | 0 | 0 | 0 | 1 | 0 | 0 | 1 | 3 |
| <u>ARHGAP17</u>  | 0 | 1 | 0 | 0 | 0 | 0 | 1 | 0 | 0 | 1 | 3 |



|                 |   |   |   |   |   |   |   |   |   |   |   |
|-----------------|---|---|---|---|---|---|---|---|---|---|---|
| <u>C6orf166</u> | 0 | 1 | 0 | 0 | 0 | 0 | 1 | 0 | 0 | 1 | 3 |
| <u>GOLPH3L</u>  | 0 | 1 | 0 | 0 | 0 | 0 | 1 | 0 | 0 | 1 | 3 |
| <u>TMEM57</u>   | 0 | 1 | 0 | 0 | 0 | 0 | 1 | 0 | 0 | 1 | 3 |
| <u>PNMAL1</u>   | 0 | 1 | 0 | 0 | 0 | 0 | 1 | 0 | 0 | 1 | 3 |
| <u>PANK4</u>    | 0 | 1 | 0 | 0 | 0 | 0 | 1 | 0 | 0 | 1 | 3 |
| <u>MCOLN3</u>   | 0 | 1 | 0 | 0 | 0 | 0 | 1 | 0 | 0 | 1 | 3 |
| <u>C4orf19</u>  | 0 | 1 | 0 | 0 | 0 | 0 | 1 | 0 | 0 | 1 | 3 |
| <u>CCDC91</u>   | 0 | 1 | 0 | 0 | 0 | 0 | 1 | 0 | 0 | 1 | 3 |
| <u>CNO</u>      | 0 | 1 | 0 | 0 | 0 | 0 | 1 | 0 | 0 | 1 | 3 |
| <u>SYNJ2BP</u>  | 0 | 1 | 0 | 0 | 0 | 0 | 1 | 0 | 0 | 1 | 3 |
| <u>LSG1</u>     | 0 | 1 | 0 | 0 | 0 | 0 | 1 | 0 | 0 | 1 | 3 |
| <u>STYK1</u>    | 0 | 1 | 0 | 0 | 0 | 0 | 1 | 0 | 0 | 1 | 3 |
| <u>C4orf16</u>  | 0 | 1 | 0 | 0 | 0 | 0 | 1 | 0 | 0 | 1 | 3 |
| <u>TRPV6</u>    | 0 | 1 | 0 | 0 | 0 | 0 | 1 | 0 | 0 | 1 | 3 |
| <u>TRIM36</u>   | 0 | 1 | 0 | 0 | 0 | 0 | 1 | 0 | 0 | 1 | 3 |
| <u>FAM48A</u>   | 0 | 1 | 0 | 0 | 0 | 0 | 1 | 0 | 0 | 1 | 3 |
| <u>UBE2Q1</u>   | 0 | 1 | 0 | 0 | 0 | 0 | 1 | 0 | 0 | 1 | 3 |
| <u>CCDC132</u>  | 0 | 1 | 0 | 0 | 0 | 0 | 1 | 0 | 0 | 1 | 3 |
| <u>KIF16B</u>   | 0 | 1 | 0 | 0 | 0 | 0 | 1 | 0 | 0 | 1 | 3 |
| <u>AMBRA1</u>   | 0 | 1 | 0 | 0 | 0 | 0 | 1 | 0 | 1 | 0 | 3 |
| <u>PRKAB1</u>   | 0 | 1 | 0 | 0 | 0 | 0 | 1 | 0 | 0 | 1 | 3 |
| <u>HIF1AN</u>   | 0 | 1 | 0 | 0 | 0 | 0 | 1 | 0 | 0 | 1 | 3 |
| <u>MFN1</u>     | 0 | 1 | 0 | 0 | 0 | 0 | 1 | 0 | 1 | 0 | 3 |
| <u>ODZ3</u>     | 0 | 1 | 0 | 0 | 0 | 0 | 1 | 0 | 0 | 1 | 3 |
| <u>CEP72</u>    | 0 | 1 | 0 | 0 | 0 | 0 | 1 | 0 | 0 | 1 | 3 |
| <u>PRKCI</u>    | 0 | 1 | 0 | 0 | 0 | 0 | 1 | 0 | 0 | 1 | 3 |
| <u>WWC3</u>     | 0 | 1 | 0 | 0 | 0 | 0 | 1 | 0 | 0 | 1 | 3 |
| <u>PKN2</u>     | 0 | 1 | 0 | 0 | 0 | 0 | 1 | 0 | 0 | 1 | 3 |
| <u>PRKD1</u>    | 0 | 1 | 0 | 0 | 0 | 0 | 1 | 0 | 0 | 1 | 3 |
| <u>WSB2</u>     | 0 | 1 | 0 | 0 | 0 | 0 | 1 | 0 | 0 | 1 | 3 |
| <u>NXT2</u>     | 0 | 1 | 0 | 0 | 0 | 0 | 1 | 0 | 0 | 1 | 3 |
| <u>MYO5C</u>    | 0 | 1 | 0 | 0 | 0 | 0 | 1 | 0 | 1 | 0 | 3 |
| <u>BCAP29</u>   | 0 | 1 | 0 | 0 | 0 | 0 | 1 | 0 | 0 | 1 | 3 |
| <u>PDGFC</u>    | 0 | 1 | 0 | 0 | 0 | 0 | 1 | 0 | 0 | 1 | 3 |
| <u>PCDHB7</u>   | 0 | 1 | 0 | 0 | 0 | 0 | 1 | 0 | 0 | 1 | 3 |
| <u>PRKY</u>     | 0 | 1 | 0 | 0 | 0 | 0 | 1 | 0 | 0 | 1 | 3 |
| <u>PRLR</u>     | 0 | 1 | 0 | 0 | 0 | 0 | 1 | 0 | 0 | 1 | 3 |
| <u>EIF5A2</u>   | 0 | 1 | 0 | 0 | 0 | 0 | 1 | 0 | 0 | 1 | 3 |
| <u>SUCNR1</u>   | 0 | 1 | 0 | 0 | 0 | 0 | 1 | 0 | 0 | 1 | 3 |
| <u>SPHK2</u>    | 0 | 1 | 0 | 0 | 0 | 0 | 1 | 0 | 0 | 1 | 3 |
| <u>RAD18</u>    | 0 | 1 | 0 | 0 | 0 | 0 | 1 | 0 | 0 | 1 | 3 |

|                 |   |   |   |   |   |   |   |   |   |   |   |
|-----------------|---|---|---|---|---|---|---|---|---|---|---|
| <u>MDM1</u>     | 0 | 1 | 0 | 0 | 0 | 0 | 1 | 0 | 0 | 1 | 3 |
| <u>ANKMY2</u>   | 0 | 1 | 0 | 0 | 0 | 0 | 1 | 0 | 0 | 1 | 3 |
| <u>JPH2</u>     | 0 | 1 | 0 | 0 | 0 | 0 | 1 | 0 | 0 | 1 | 3 |
| <u>ZMIZ1</u>    | 0 | 1 | 0 | 0 | 0 | 0 | 1 | 0 | 0 | 1 | 3 |
| <u>KIAA1147</u> | 0 | 1 | 0 | 0 | 0 | 0 | 1 | 1 | 0 | 0 | 3 |
| <u>ATP8B2</u>   | 0 | 1 | 0 | 0 | 0 | 0 | 1 | 0 | 0 | 1 | 3 |
| <u>PTGFR</u>    | 0 | 1 | 0 | 0 | 0 | 0 | 1 | 0 | 0 | 1 | 3 |
| <u>MRS2</u>     | 0 | 1 | 0 | 0 | 0 | 0 | 1 | 0 | 0 | 1 | 3 |
| <u>RAB22A</u>   | 0 | 1 | 0 | 0 | 0 | 0 | 1 | 0 | 0 | 1 | 3 |
| <u>CYP20A1</u>  | 0 | 1 | 0 | 0 | 0 | 0 | 1 | 0 | 0 | 1 | 3 |
| <u>PTGS1</u>    | 0 | 1 | 0 | 0 | 0 | 0 | 1 | 0 | 0 | 1 | 3 |
| <u>ZNF490</u>   | 0 | 1 | 0 | 0 | 0 | 0 | 1 | 0 | 0 | 1 | 3 |
| <u>SRGAP1</u>   | 0 | 1 | 0 | 0 | 0 | 0 | 1 | 0 | 0 | 1 | 3 |
| <u>KCTD16</u>   | 0 | 1 | 0 | 0 | 0 | 0 | 1 | 0 | 0 | 1 | 3 |
| <u>MIB1</u>     | 0 | 1 | 0 | 0 | 0 | 0 | 1 | 0 | 0 | 1 | 3 |
| <u>ZNF624</u>   | 0 | 1 | 0 | 0 | 0 | 0 | 1 | 0 | 0 | 1 | 3 |
| <u>KLHL14</u>   | 0 | 1 | 0 | 0 | 0 | 0 | 1 | 0 | 0 | 1 | 3 |
| <u>ZNF319</u>   | 0 | 1 | 0 | 0 | 0 | 0 | 1 | 0 | 0 | 1 | 3 |
| <u>ZNF471</u>   | 0 | 1 | 0 | 0 | 0 | 0 | 1 | 0 | 0 | 1 | 3 |
| <u>KIAA1430</u> | 0 | 1 | 0 | 0 | 0 | 0 | 1 | 0 | 0 | 1 | 3 |
| <u>KIAA1622</u> | 0 | 1 | 0 | 0 | 0 | 0 | 1 | 0 | 0 | 1 | 3 |
| <u>PTPRR</u>    | 0 | 1 | 0 | 0 | 0 | 0 | 1 | 0 | 0 | 1 | 3 |
| <u>ABCD3</u>    | 0 | 1 | 0 | 0 | 0 | 0 | 1 | 0 | 0 | 1 | 3 |
| <u>MS4A7</u>    | 0 | 1 | 0 | 0 | 0 | 0 | 1 | 0 | 0 | 1 | 3 |
| <u>BCAT1</u>    | 0 | 1 | 0 | 0 | 0 | 0 | 1 | 0 | 0 | 1 | 3 |
| <u>RAB1A</u>    | 0 | 1 | 0 | 0 | 0 | 0 | 1 | 0 | 0 | 1 | 3 |
| <u>RAB3IL1</u>  | 0 | 1 | 0 | 0 | 0 | 0 | 1 | 0 | 0 | 1 | 3 |
| <u>RAB4A</u>    | 0 | 1 | 0 | 0 | 0 | 0 | 1 | 0 | 0 | 1 | 3 |
| <u>RAP1GDS1</u> | 0 | 1 | 0 | 0 | 0 | 0 | 1 | 0 | 0 | 1 | 3 |
| <u>RB1</u>      | 0 | 1 | 0 | 0 | 0 | 0 | 1 | 0 | 0 | 1 | 3 |
| <u>PLEKHA2</u>  | 0 | 1 | 0 | 0 | 0 | 0 | 1 | 0 | 0 | 1 | 3 |
| <u>KLHL12</u>   | 0 | 1 | 0 | 0 | 0 | 0 | 1 | 0 | 0 | 1 | 3 |
| <u>RDX</u>      | 0 | 1 | 0 | 0 | 0 | 0 | 1 | 0 | 0 | 1 | 3 |
| <u>RFX4</u>     | 0 | 1 | 0 | 0 | 0 | 0 | 1 | 0 | 0 | 1 | 3 |
| <u>RGS1</u>     | 0 | 1 | 0 | 0 | 0 | 0 | 1 | 0 | 0 | 1 | 3 |
| <u>SAV1</u>     | 0 | 1 | 0 | 0 | 0 | 0 | 1 | 0 | 0 | 1 | 3 |
| <u>FASTKD5</u>  | 0 | 1 | 0 | 0 | 0 | 0 | 1 | 0 | 0 | 1 | 3 |
| <u>SMAP1</u>    | 0 | 1 | 0 | 0 | 0 | 0 | 1 | 0 | 0 | 1 | 3 |
| <u>BCL9</u>     | 0 | 1 | 0 | 0 | 0 | 0 | 1 | 0 | 0 | 1 | 3 |
| <u>RORB</u>     | 0 | 1 | 0 | 0 | 0 | 0 | 1 | 0 | 0 | 1 | 3 |
| <u>BCR</u>      | 0 | 1 | 0 | 0 | 0 | 0 | 1 | 0 | 0 | 1 | 3 |

|                 |   |   |   |   |   |   |   |   |   |   |   |
|-----------------|---|---|---|---|---|---|---|---|---|---|---|
| <u>RPL27A</u>   | 0 | 1 | 0 | 0 | 0 | 0 | 1 | 0 | 0 | 1 | 3 |
| <u>RREB1</u>    | 0 | 1 | 0 | 0 | 0 | 0 | 1 | 0 | 0 | 1 | 3 |
| <u>RSU1</u>     | 0 | 1 | 0 | 0 | 0 | 0 | 1 | 0 | 0 | 1 | 3 |
| <u>MAPK12</u>   | 0 | 1 | 0 | 0 | 0 | 0 | 1 | 0 | 0 | 1 | 3 |
| <u>SCML1</u>    | 0 | 1 | 0 | 0 | 0 | 0 | 1 | 0 | 0 | 1 | 3 |
| <u>SCN4A</u>    | 0 | 1 | 0 | 0 | 0 | 0 | 1 | 0 | 0 | 1 | 3 |
| <u>SCN4B</u>    | 0 | 1 | 0 | 0 | 0 | 0 | 1 | 0 | 0 | 1 | 3 |
| <u>PBLD</u>     | 0 | 1 | 0 | 0 | 0 | 0 | 1 | 0 | 0 | 1 | 3 |
| <u>LRRC4</u>    | 0 | 1 | 0 | 0 | 0 | 0 | 1 | 0 | 0 | 1 | 3 |
| <u>C10orf54</u> | 0 | 1 | 0 | 0 | 0 | 0 | 1 | 0 | 0 | 1 | 3 |
| <u>ABCG5</u>    | 0 | 1 | 0 | 0 | 0 | 0 | 1 | 0 | 0 | 1 | 3 |
| <u>LMBR1</u>    | 0 | 1 | 0 | 0 | 0 | 0 | 1 | 0 | 0 | 1 | 3 |
| <u>NFKBIZ</u>   | 0 | 1 | 0 | 0 | 0 | 0 | 1 | 0 | 0 | 1 | 3 |
| <u>MMP25</u>    | 0 | 1 | 0 | 0 | 0 | 0 | 1 | 0 | 0 | 1 | 3 |
| <u>GREM2</u>    | 0 | 1 | 0 | 0 | 0 | 0 | 1 | 0 | 0 | 1 | 3 |
| <u>SFTPB</u>    | 0 | 1 | 0 | 0 | 0 | 0 | 1 | 1 | 0 | 0 | 3 |
| <u>GPR135</u>   | 0 | 1 | 0 | 0 | 0 | 0 | 1 | 0 | 0 | 1 | 3 |
| <u>UNKL</u>     | 0 | 1 | 0 | 0 | 0 | 0 | 1 | 0 | 0 | 1 | 3 |
| <u>C6orf106</u> | 0 | 1 | 0 | 0 | 0 | 0 | 1 | 0 | 0 | 1 | 3 |
| <u>IQCH</u>     | 0 | 1 | 0 | 0 | 0 | 0 | 1 | 0 | 0 | 1 | 3 |
| <u>CDCP1</u>    | 0 | 1 | 0 | 0 | 0 | 0 | 1 | 1 | 0 | 0 | 3 |
| <u>RANBP17</u>  | 0 | 1 | 0 | 0 | 0 | 0 | 1 | 0 | 0 | 1 | 3 |
| <u>MRPL34</u>   | 0 | 1 | 0 | 0 | 0 | 0 | 1 | 0 | 0 | 1 | 3 |
| <u>SMTN</u>     | 0 | 1 | 0 | 0 | 0 | 0 | 1 | 0 | 1 | 0 | 3 |
| <u>SLC8A1</u>   | 0 | 1 | 0 | 0 | 0 | 0 | 1 | 0 | 0 | 1 | 3 |
| <u>SLC9A2</u>   | 0 | 1 | 0 | 0 | 0 | 0 | 1 | 0 | 0 | 1 | 3 |
| <u>SLC16A1</u>  | 0 | 1 | 0 | 0 | 0 | 0 | 1 | 0 | 0 | 1 | 3 |
| <u>SNAI2</u>    | 0 | 1 | 0 | 0 | 0 | 0 | 1 | 0 | 0 | 1 | 3 |
| <u>SNAPC1</u>   | 0 | 1 | 0 | 0 | 0 | 0 | 1 | 0 | 0 | 1 | 3 |
| <u>SOAT1</u>    | 0 | 1 | 0 | 0 | 0 | 0 | 1 | 0 | 0 | 1 | 3 |
| <u>SOX11</u>    | 0 | 1 | 0 | 0 | 0 | 0 | 1 | 0 | 0 | 1 | 3 |
| <u>SSTR2</u>    | 0 | 1 | 0 | 0 | 0 | 0 | 1 | 0 | 0 | 1 | 3 |
| <u>STAU1</u>    | 0 | 1 | 0 | 0 | 0 | 0 | 1 | 0 | 0 | 1 | 3 |
| <u>STK10</u>    | 0 | 1 | 0 | 0 | 0 | 0 | 1 | 0 | 0 | 1 | 3 |
| <u>MED22</u>    | 0 | 1 | 0 | 0 | 0 | 0 | 1 | 0 | 0 | 1 | 3 |
| <u>BTC</u>      | 0 | 1 | 0 | 0 | 0 | 0 | 1 | 0 | 0 | 1 | 3 |
| <u>SYPL1</u>    | 0 | 1 | 0 | 0 | 0 | 0 | 1 | 0 | 0 | 1 | 3 |
| <u>SYT4</u>     | 0 | 1 | 0 | 0 | 0 | 0 | 1 | 0 | 0 | 1 | 3 |
| <u>TACC1</u>    | 0 | 1 | 0 | 0 | 0 | 0 | 1 | 0 | 0 | 1 | 3 |
| <u>TAF2</u>     | 0 | 1 | 0 | 0 | 0 | 0 | 1 | 0 | 0 | 1 | 3 |
| <u>TAF4B</u>    | 0 | 1 | 0 | 0 | 0 | 0 | 1 | 0 | 0 | 1 | 3 |

|          |   |   |   |   |   |   |   |   |   |   |   |
|----------|---|---|---|---|---|---|---|---|---|---|---|
| TAF7     | 0 | 1 | 0 | 0 | 0 | 0 | 1 | 0 | 0 | 1 | 3 |
| TEF      | 0 | 1 | 0 | 0 | 0 | 0 | 1 | 0 | 0 | 1 | 3 |
| THBS1    | 0 | 1 | 0 | 0 | 0 | 0 | 1 | 0 | 0 | 1 | 3 |
| THBS2    | 0 | 1 | 0 | 0 | 0 | 0 | 1 | 0 | 0 | 1 | 3 |
| TIAM1    | 0 | 1 | 0 | 0 | 0 | 0 | 1 | 0 | 1 | 0 | 3 |
| TNNI1    | 0 | 1 | 0 | 0 | 0 | 0 | 1 | 0 | 0 | 1 | 3 |
| TNP1     | 0 | 1 | 0 | 0 | 0 | 0 | 1 | 0 | 0 | 1 | 3 |
| TRAF5    | 0 | 1 | 0 | 0 | 0 | 0 | 1 | 0 | 0 | 1 | 3 |
| TUFT1    | 0 | 1 | 0 | 0 | 0 | 0 | 1 | 0 | 0 | 1 | 3 |
| TULP3    | 0 | 1 | 0 | 0 | 0 | 0 | 1 | 0 | 0 | 1 | 3 |
| UBE2E1   | 0 | 1 | 0 | 0 | 0 | 0 | 1 | 0 | 0 | 1 | 3 |
| UBE2L3   | 0 | 1 | 0 | 0 | 0 | 0 | 1 | 0 | 0 | 1 | 3 |
| UGDH     | 0 | 1 | 0 | 0 | 0 | 0 | 1 | 0 | 0 | 1 | 3 |
| VSNL1    | 0 | 1 | 0 | 0 | 0 | 0 | 1 | 0 | 0 | 1 | 3 |
| WNT5A    | 0 | 1 | 0 | 0 | 0 | 0 | 1 | 0 | 0 | 1 | 3 |
| YY1      | 0 | 1 | 0 | 0 | 0 | 0 | 1 | 0 | 0 | 1 | 3 |
| ZFP161   | 0 | 1 | 0 | 0 | 0 | 0 | 1 | 0 | 0 | 1 | 3 |
| ZNF12    | 0 | 1 | 0 | 0 | 0 | 0 | 1 | 0 | 0 | 1 | 3 |
| ZNF33A   | 0 | 1 | 0 | 0 | 0 | 0 | 1 | 0 | 0 | 1 | 3 |
| TRIM25   | 0 | 1 | 0 | 0 | 0 | 0 | 1 | 0 | 0 | 1 | 3 |
| ZNF180   | 0 | 1 | 0 | 0 | 0 | 0 | 1 | 0 | 0 | 1 | 3 |
| ZNF192   | 0 | 1 | 0 | 0 | 0 | 0 | 1 | 0 | 0 | 1 | 3 |
| CACNA1E  | 0 | 1 | 0 | 0 | 0 | 0 | 1 | 0 | 0 | 1 | 3 |
| ZNF228   | 0 | 1 | 0 | 0 | 0 | 0 | 1 | 0 | 0 | 1 | 3 |
| ZNF230   | 0 | 1 | 0 | 0 | 0 | 0 | 1 | 0 | 0 | 1 | 3 |
| LAPTM5   | 0 | 1 | 0 | 0 | 0 | 0 | 1 | 0 | 0 | 1 | 3 |
| BTG2     | 0 | 1 | 0 | 0 | 0 | 0 | 1 | 0 | 0 | 1 | 3 |
| PXDN     | 0 | 1 | 0 | 0 | 0 | 0 | 1 | 0 | 0 | 1 | 3 |
| AHNAK    | 0 | 1 | 0 | 0 | 0 | 0 | 1 | 0 | 0 | 1 | 3 |
| ALDH5A1  | 0 | 1 | 0 | 0 | 0 | 0 | 1 | 0 | 0 | 1 | 3 |
| MFSD11   | 0 | 1 | 0 | 0 | 0 | 0 | 1 | 0 | 0 | 1 | 3 |
| BRCC3    | 0 | 1 | 0 | 0 | 0 | 0 | 1 | 0 | 0 | 1 | 3 |
| ZBED2    | 0 | 1 | 0 | 0 | 0 | 0 | 1 | 0 | 0 | 1 | 3 |
| RNF219   | 0 | 1 | 0 | 0 | 0 | 0 | 1 | 0 | 0 | 1 | 3 |
| ADIPOR2  | 0 | 1 | 0 | 0 | 0 | 0 | 1 | 0 | 0 | 1 | 3 |
| C5orf23  | 0 | 1 | 0 | 0 | 0 | 0 | 1 | 0 | 0 | 1 | 3 |
| VTCN1    | 0 | 1 | 0 | 0 | 0 | 0 | 1 | 0 | 0 | 1 | 3 |
| C22orf29 | 0 | 1 | 0 | 0 | 0 | 0 | 1 | 0 | 0 | 1 | 3 |
| MANEA    | 0 | 1 | 0 | 0 | 0 | 0 | 1 | 0 | 0 | 1 | 3 |
| GLT25D1  | 0 | 1 | 0 | 0 | 0 | 0 | 1 | 0 | 0 | 1 | 3 |
| MAFK     | 0 | 1 | 0 | 0 | 0 | 0 | 1 | 0 | 0 | 1 | 3 |

|                 |   |   |   |   |   |   |   |   |   |   |   |
|-----------------|---|---|---|---|---|---|---|---|---|---|---|
| <u>SNIP1</u>    | 0 | 1 | 0 | 0 | 0 | 0 | 1 | 0 | 0 | 1 | 3 |
| <u>MOBKL2B</u>  | 0 | 1 | 0 | 0 | 0 | 0 | 1 | 0 | 0 | 1 | 3 |
| <u>C13orf34</u> | 0 | 1 | 0 | 0 | 0 | 0 | 1 | 0 | 0 | 1 | 3 |
| <u>L2HGDH</u>   | 0 | 1 | 0 | 0 | 0 | 0 | 1 | 0 | 0 | 1 | 3 |
| <u>CALD1</u>    | 0 | 1 | 0 | 0 | 0 | 0 | 1 | 0 | 0 | 1 | 3 |
| <u>FLJ13611</u> | 0 | 1 | 0 | 0 | 0 | 0 | 1 | 0 | 0 | 1 | 3 |
| <u>C12orf30</u> | 0 | 1 | 0 | 0 | 0 | 0 | 1 | 0 | 0 | 1 | 3 |
| <u>SEMA6D</u>   | 0 | 1 | 0 | 0 | 0 | 0 | 1 | 0 | 0 | 1 | 3 |
| <u>SIKE</u>     | 0 | 1 | 0 | 0 | 0 | 0 | 1 | 0 | 0 | 1 | 3 |
| <u>FUZ</u>      | 0 | 1 | 0 | 0 | 0 | 0 | 1 | 0 | 0 | 1 | 3 |
| <u>NUBPL</u>    | 0 | 1 | 0 | 0 | 0 | 0 | 1 | 0 | 0 | 1 | 3 |
| <u>CEP63</u>    | 0 | 1 | 0 | 0 | 0 | 0 | 1 | 0 | 0 | 1 | 3 |
| <u>PDGFD</u>    | 0 | 1 | 0 | 0 | 0 | 0 | 1 | 0 | 0 | 1 | 3 |
| <u>LRRC27</u>   | 0 | 1 | 0 | 0 | 0 | 0 | 1 | 0 | 0 | 1 | 3 |
| <u>DNAJC5</u>   | 0 | 1 | 0 | 0 | 0 | 0 | 1 | 1 | 0 | 0 | 3 |
| <u>WDR61</u>    | 0 | 1 | 0 | 0 | 0 | 0 | 1 | 0 | 0 | 1 | 3 |
| <u>PDHX</u>     | 0 | 1 | 0 | 0 | 0 | 0 | 1 | 0 | 0 | 1 | 3 |
| <u>TSGA10</u>   | 0 | 1 | 0 | 0 | 0 | 0 | 1 | 0 | 1 | 0 | 3 |
| <u>AKNA</u>     | 0 | 1 | 0 | 0 | 0 | 0 | 1 | 0 | 0 | 1 | 3 |
| <u>KIAA1712</u> | 0 | 1 | 0 | 0 | 0 | 0 | 1 | 0 | 0 | 1 | 3 |
| <u>EEPD1</u>    | 0 | 1 | 0 | 0 | 0 | 0 | 1 | 1 | 0 | 0 | 3 |
| <u>JHDM1D</u>   | 0 | 1 | 0 | 0 | 0 | 0 | 1 | 0 | 0 | 1 | 3 |
| <u>SETD7</u>    | 0 | 1 | 0 | 0 | 0 | 0 | 1 | 0 | 0 | 1 | 3 |
| <u>GJA9</u>     | 0 | 1 | 0 | 0 | 0 | 0 | 1 | 0 | 0 | 1 | 3 |
| <u>CALR</u>     | 0 | 1 | 0 | 0 | 0 | 0 | 1 | 0 | 0 | 1 | 3 |
| <u>TXNDC1</u>   | 0 | 1 | 0 | 0 | 0 | 0 | 1 | 0 | 0 | 1 | 3 |
| <u>FAM130A1</u> | 0 | 1 | 0 | 0 | 0 | 0 | 1 | 0 | 0 | 1 | 3 |
| <u>CAB39L</u>   | 0 | 1 | 0 | 0 | 0 | 0 | 1 | 0 | 0 | 1 | 3 |
| <u>DIAPH3</u>   | 0 | 1 | 0 | 0 | 0 | 0 | 1 | 0 | 0 | 1 | 3 |
| <u>TMEM49</u>   | 0 | 1 | 0 | 0 | 0 | 0 | 1 | 0 | 1 | 0 | 3 |
| <u>ISCA1</u>    | 0 | 1 | 0 | 0 | 0 | 0 | 1 | 0 | 0 | 1 | 3 |
| <u>SFXN3</u>    | 0 | 1 | 0 | 0 | 0 | 0 | 1 | 0 | 0 | 1 | 3 |
| <u>ACOX3</u>    | 0 | 1 | 0 | 0 | 0 | 0 | 1 | 0 | 0 | 1 | 3 |
| <u>HSDL1</u>    | 0 | 1 | 0 | 0 | 0 | 0 | 1 | 0 | 0 | 1 | 3 |
| <u>NRIP2</u>    | 0 | 1 | 0 | 0 | 0 | 0 | 1 | 1 | 0 | 0 | 3 |
| <u>ITCH</u>     | 0 | 1 | 0 | 0 | 0 | 0 | 1 | 0 | 0 | 1 | 3 |
| <u>BCDO2</u>    | 0 | 1 | 0 | 0 | 0 | 0 | 1 | 0 | 0 | 1 | 3 |
| <u>SLC25A2</u>  | 0 | 1 | 0 | 0 | 0 | 0 | 1 | 0 | 0 | 1 | 3 |
| <u>CTTNBP2</u>  | 0 | 1 | 0 | 0 | 0 | 0 | 1 | 0 | 0 | 1 | 3 |
| <u>KREMEN1</u>  | 0 | 1 | 0 | 0 | 0 | 0 | 1 | 0 | 0 | 1 | 3 |
| <u>ARID5B</u>   | 0 | 1 | 0 | 0 | 0 | 0 | 1 | 0 | 0 | 1 | 3 |

|                 |   |   |   |   |   |   |   |   |   |   |   |
|-----------------|---|---|---|---|---|---|---|---|---|---|---|
| <u>MLSTD2</u>   | 0 | 1 | 0 | 0 | 0 | 0 | 1 | 0 | 0 | 1 | 3 |
| <u>NBPF3</u>    | 0 | 1 | 0 | 0 | 0 | 0 | 1 | 0 | 0 | 1 | 3 |
| <u>MGC3207</u>  | 0 | 1 | 0 | 0 | 0 | 0 | 1 | 0 | 0 | 1 | 3 |
| <u>C12orf31</u> | 0 | 1 | 0 | 0 | 0 | 0 | 1 | 0 | 0 | 1 | 3 |
| <u>HPS3</u>     | 0 | 1 | 0 | 0 | 0 | 0 | 1 | 0 | 0 | 1 | 3 |
| <u>ZNF528</u>   | 0 | 1 | 0 | 0 | 0 | 0 | 1 | 0 | 0 | 1 | 3 |
| <u>KIAA1804</u> | 0 | 1 | 0 | 0 | 0 | 0 | 1 | 0 | 0 | 1 | 3 |
| <u>PHYHIPL</u>  | 0 | 1 | 0 | 0 | 0 | 0 | 1 | 0 | 0 | 1 | 3 |
| <u>SLC12A8</u>  | 0 | 1 | 0 | 0 | 0 | 0 | 1 | 0 | 0 | 1 | 3 |
| <u>TPST2</u>    | 0 | 1 | 0 | 0 | 0 | 0 | 1 | 0 | 0 | 1 | 3 |
| <u>CASR</u>     | 0 | 1 | 0 | 0 | 0 | 0 | 1 | 0 | 0 | 1 | 3 |
| <u>TRIM55</u>   | 0 | 1 | 0 | 0 | 0 | 0 | 1 | 0 | 1 | 0 | 3 |
| <u>CNDP1</u>    | 0 | 1 | 0 | 0 | 0 | 0 | 1 | 0 | 0 | 1 | 3 |
| <u>ZNF577</u>   | 0 | 1 | 0 | 0 | 0 | 0 | 1 | 1 | 0 | 0 | 3 |
| <u>TXNDC17</u>  | 0 | 1 | 0 | 0 | 0 | 0 | 1 | 0 | 0 | 1 | 3 |
| <u>RNFT2</u>    | 0 | 1 | 0 | 0 | 0 | 0 | 1 | 0 | 0 | 1 | 3 |
| <u>NDST2</u>    | 0 | 1 | 0 | 0 | 0 | 0 | 1 | 0 | 0 | 1 | 3 |
| <u>ZCCHC3</u>   | 0 | 1 | 0 | 0 | 0 | 0 | 1 | 0 | 0 | 1 | 3 |
| <u>C4orf35</u>  | 0 | 1 | 0 | 0 | 0 | 0 | 1 | 0 | 0 | 1 | 3 |
| <u>ZC3H12C</u>  | 0 | 1 | 0 | 0 | 0 | 0 | 1 | 0 | 0 | 1 | 3 |
| <u>GFM1</u>     | 0 | 1 | 0 | 0 | 0 | 0 | 1 | 0 | 0 | 1 | 3 |
| <u>CDS2</u>     | 0 | 1 | 0 | 0 | 0 | 0 | 1 | 0 | 0 | 1 | 3 |
| <u>NRP1</u>     | 0 | 1 | 0 | 0 | 0 | 0 | 1 | 0 | 0 | 1 | 3 |
| <u>CD84</u>     | 0 | 1 | 0 | 0 | 0 | 0 | 1 | 0 | 0 | 1 | 3 |
| <u>SOCS2</u>    | 0 | 1 | 0 | 0 | 0 | 0 | 1 | 0 | 0 | 1 | 3 |
| <u>ARHGEF7</u>  | 0 | 1 | 1 | 0 | 0 | 0 | 0 | 0 | 0 | 1 | 3 |
| <u>AP1S2</u>    | 0 | 1 | 0 | 0 | 0 | 0 | 1 | 0 | 0 | 1 | 3 |
| <u>GAL3ST3</u>  | 0 | 1 | 0 | 0 | 0 | 0 | 1 | 0 | 0 | 1 | 3 |
| <u>NAV2</u>     | 0 | 1 | 0 | 0 | 0 | 0 | 1 | 0 | 0 | 1 | 3 |
| <u>AQP10</u>    | 0 | 1 | 0 | 0 | 0 | 0 | 1 | 0 | 0 | 1 | 3 |
| <u>TRPA1</u>    | 0 | 1 | 0 | 0 | 0 | 0 | 1 | 0 | 0 | 1 | 3 |
| <u>ATPBD4</u>   | 0 | 1 | 0 | 0 | 0 | 0 | 1 | 0 | 0 | 1 | 3 |
| <u>SOCS3</u>    | 0 | 1 | 0 | 0 | 0 | 0 | 1 | 0 | 0 | 1 | 3 |
| <u>CH25H</u>    | 0 | 1 | 0 | 0 | 0 | 0 | 1 | 0 | 0 | 1 | 3 |
| <u>BMF</u>      | 0 | 1 | 0 | 0 | 0 | 0 | 1 | 0 | 0 | 1 | 3 |
| <u>N4BP2L1</u>  | 0 | 1 | 0 | 0 | 0 | 0 | 1 | 0 | 0 | 1 | 3 |
| <u>CLDN12</u>   | 0 | 1 | 0 | 0 | 0 | 0 | 1 | 0 | 0 | 1 | 3 |
| <u>ANGEL2</u>   | 0 | 1 | 0 | 0 | 0 | 0 | 1 | 0 | 0 | 1 | 3 |
| <u>EIF1AY</u>   | 0 | 1 | 0 | 0 | 0 | 0 | 1 | 0 | 0 | 1 | 3 |
| <u>DNAJA3</u>   | 0 | 1 | 0 | 0 | 0 | 0 | 1 | 0 | 0 | 1 | 3 |
| <u>CCDC34</u>   | 0 | 1 | 0 | 0 | 0 | 0 | 1 | 0 | 0 | 1 | 3 |

|                 |   |   |   |   |   |   |   |   |   |   |   |
|-----------------|---|---|---|---|---|---|---|---|---|---|---|
| <u>SLC16A4</u>  | 0 | 1 | 0 | 0 | 0 | 0 | 1 | 0 | 0 | 1 | 3 |
| <u>FAM44B</u>   | 0 | 1 | 0 | 0 | 0 | 0 | 1 | 0 | 0 | 1 | 3 |
| <u>RABEP1</u>   | 0 | 1 | 0 | 0 | 0 | 0 | 1 | 0 | 0 | 1 | 3 |
| <u>LOC91461</u> | 0 | 1 | 0 | 0 | 0 | 0 | 1 | 0 | 0 | 1 | 3 |
| <u>RSAD2</u>    | 0 | 1 | 0 | 0 | 0 | 0 | 1 | 0 | 0 | 1 | 3 |
| <u>ZNF830</u>   | 0 | 1 | 0 | 0 | 0 | 0 | 1 | 0 | 0 | 1 | 3 |
| <u>NEXN</u>     | 0 | 1 | 0 | 0 | 0 | 0 | 1 | 0 | 1 | 0 | 3 |
| <u>KIAA1919</u> | 0 | 1 | 0 | 0 | 0 | 0 | 1 | 0 | 0 | 1 | 3 |
| <u>CHMP7</u>    | 0 | 1 | 0 | 0 | 0 | 0 | 1 | 0 | 0 | 1 | 3 |
| <u>MYLK3</u>    | 0 | 1 | 0 | 0 | 0 | 0 | 1 | 0 | 0 | 1 | 3 |
| <u>UBTD2</u>    | 0 | 1 | 0 | 0 | 0 | 0 | 1 | 0 | 0 | 1 | 3 |
| <u>MAGI1</u>    | 0 | 1 | 0 | 0 | 0 | 0 | 1 | 0 | 0 | 1 | 3 |
| <u>ZNF461</u>   | 0 | 1 | 0 | 0 | 0 | 0 | 1 | 0 | 0 | 1 | 3 |
| <u>MEX3A</u>    | 0 | 1 | 0 | 0 | 0 | 0 | 1 | 0 | 0 | 1 | 3 |
| <u>CCDC64</u>   | 0 | 1 | 0 | 0 | 0 | 0 | 1 | 0 | 0 | 1 | 3 |
| <u>STK17A</u>   | 0 | 1 | 0 | 0 | 0 | 0 | 1 | 0 | 0 | 1 | 3 |
| <u>GPR37L1</u>  | 0 | 1 | 0 | 0 | 0 | 0 | 1 | 0 | 0 | 1 | 3 |
| <u>EDG5</u>     | 0 | 1 | 0 | 0 | 0 | 0 | 1 | 0 | 0 | 1 | 3 |
| <u>SOCS6</u>    | 0 | 1 | 0 | 0 | 0 | 0 | 1 | 0 | 0 | 1 | 3 |
| <u>MMP20</u>    | 0 | 1 | 0 | 0 | 0 | 0 | 1 | 0 | 0 | 1 | 3 |
| <u>B4GALT5</u>  | 0 | 1 | 0 | 0 | 0 | 0 | 1 | 0 | 0 | 1 | 3 |
| <u>TMEM32</u>   | 0 | 1 | 0 | 0 | 0 | 0 | 1 | 0 | 0 | 1 | 3 |
| <u>ZNF670</u>   | 0 | 1 | 0 | 0 | 0 | 0 | 1 | 0 | 0 | 1 | 3 |
| <u>HSPC105</u>  | 0 | 1 | 0 | 0 | 0 | 0 | 1 | 0 | 0 | 1 | 3 |
| <u>UBE4A</u>    | 0 | 1 | 0 | 0 | 0 | 0 | 1 | 0 | 0 | 1 | 3 |
| <u>CD28</u>     | 0 | 1 | 0 | 0 | 0 | 0 | 1 | 0 | 0 | 1 | 3 |
| <u>TTYH2</u>    | 0 | 1 | 0 | 0 | 0 | 0 | 1 | 1 | 0 | 0 | 3 |
| <u>MAP4K4</u>   | 0 | 1 | 0 | 0 | 0 | 0 | 1 | 0 | 0 | 1 | 3 |
| <u>LY86</u>     | 0 | 1 | 0 | 0 | 0 | 0 | 1 | 0 | 0 | 1 | 3 |
| <u>FHL5</u>     | 0 | 1 | 0 | 0 | 0 | 0 | 1 | 0 | 0 | 1 | 3 |
| <u>PSMF1</u>    | 0 | 1 | 0 | 0 | 0 | 0 | 1 | 0 | 0 | 1 | 3 |
| <u>SPTLC2</u>   | 0 | 1 | 0 | 0 | 0 | 0 | 1 | 1 | 0 | 0 | 3 |
| <u>CD47</u>     | 0 | 1 | 0 | 0 | 0 | 0 | 1 | 0 | 0 | 1 | 3 |
| <u>RGS6</u>     | 0 | 1 | 0 | 0 | 0 | 0 | 1 | 0 | 0 | 1 | 3 |
| <u>FEZ1</u>     | 0 | 1 | 0 | 0 | 0 | 0 | 1 | 0 | 0 | 1 | 3 |
| <u>N4BP1</u>    | 0 | 1 | 0 | 0 | 0 | 0 | 1 | 0 | 0 | 1 | 3 |
| <u>CLINT1</u>   | 0 | 1 | 0 | 0 | 0 | 0 | 1 | 0 | 0 | 1 | 3 |
| <u>RAPGEF2</u>  | 0 | 1 | 0 | 0 | 0 | 0 | 1 | 0 | 0 | 1 | 3 |
| <u>ZNF536</u>   | 0 | 1 | 0 | 0 | 0 | 0 | 1 | 0 | 0 | 1 | 3 |
| <u>HDAC4</u>    | 0 | 1 | 0 | 0 | 0 | 0 | 1 | 0 | 0 | 1 | 3 |
| <u>KIAA0101</u> | 0 | 1 | 0 | 0 | 0 | 0 | 1 | 0 | 0 | 1 | 3 |

|                 |   |   |   |   |   |   |   |   |   |   |   |
|-----------------|---|---|---|---|---|---|---|---|---|---|---|
| <u>TM9SF4</u>   | 0 | 1 | 0 | 0 | 0 | 0 | 1 | 0 | 0 | 1 | 3 |
| <u>RIMS3</u>    | 0 | 1 | 0 | 0 | 0 | 0 | 1 | 0 | 0 | 1 | 3 |
| <u>MTSS1</u>    | 0 | 1 | 0 | 0 | 0 | 0 | 1 | 0 | 0 | 1 | 3 |
| <u>TOMM20</u>   | 0 | 1 | 0 | 0 | 0 | 0 | 1 | 0 | 0 | 1 | 3 |
| <u>KIAA0753</u> | 0 | 1 | 0 | 0 | 0 | 0 | 1 | 0 | 0 | 1 | 3 |
| <u>KIAA0644</u> | 0 | 1 | 0 | 0 | 0 | 0 | 1 | 0 | 0 | 1 | 3 |
| <u>DENND4B</u>  | 0 | 1 | 0 | 0 | 0 | 0 | 1 | 0 | 1 | 0 | 3 |
| <u>FAM20B</u>   | 0 | 1 | 0 | 0 | 0 | 0 | 1 | 0 | 0 | 1 | 3 |
| <u>MAFB</u>     | 0 | 1 | 0 | 0 | 0 | 0 | 1 | 0 | 0 | 1 | 3 |
| <u>AMMECR1</u>  | 0 | 1 | 0 | 0 | 0 | 0 | 1 | 0 | 0 | 1 | 3 |
| <u>USP15</u>    | 0 | 1 | 0 | 0 | 0 | 0 | 1 | 0 | 0 | 1 | 3 |
| <u>MED13</u>    | 0 | 1 | 0 | 0 | 0 | 0 | 1 | 0 | 0 | 1 | 3 |
| <u>ANUBL1</u>   | 0 | 0 | 1 | 0 | 0 | 0 | 1 | 0 | 0 | 1 | 3 |
| <u>PDHB</u>     | 0 | 0 | 0 | 0 | 0 | 0 | 1 | 0 | 1 | 1 | 3 |
| <u>MED29</u>    | 0 | 0 | 0 | 0 | 0 | 0 | 1 | 1 | 0 | 1 | 3 |
| <u>FGB</u>      | 0 | 0 | 0 | 0 | 0 | 0 | 1 | 0 | 1 | 1 | 3 |
| <u>PLXNA4</u>   | 0 | 0 | 0 | 0 | 0 | 0 | 1 | 1 | 0 | 1 | 3 |
| <u>MFN2</u>     | 0 | 0 | 0 | 0 | 0 | 0 | 1 | 1 | 0 | 1 | 3 |
| <u>ACSL3</u>    | 0 | 0 | 0 | 0 | 0 | 0 | 1 | 0 | 1 | 1 | 3 |
| <u>MEF2D</u>    | 0 | 0 | 0 | 0 | 0 | 0 | 1 | 1 | 0 | 1 | 3 |
| <u>ABCC3</u>    | 0 | 0 | 0 | 0 | 0 | 0 | 1 | 1 | 1 | 0 | 3 |
| <u>HMGCR</u>    | 0 | 0 | 0 | 0 | 0 | 0 | 1 | 1 | 1 | 0 | 3 |
| <u>NPLOC4</u>   | 0 | 0 | 0 | 0 | 0 | 0 | 1 | 1 | 0 | 1 | 3 |
| <u>FGF23</u>    | 0 | 0 | 0 | 0 | 0 | 0 | 1 | 1 | 0 | 1 | 3 |
| <u>NFX1</u>     | 0 | 0 | 0 | 0 | 0 | 0 | 1 | 0 | 1 | 1 | 3 |
| <u>CCDC88A</u>  | 0 | 0 | 0 | 0 | 0 | 0 | 1 | 1 | 0 | 1 | 3 |
| <u>LARP6</u>    | 0 | 0 | 0 | 0 | 0 | 0 | 1 | 1 | 1 | 0 | 3 |
| <u>DEPDC1B</u>  | 0 | 0 | 0 | 0 | 0 | 0 | 1 | 0 | 1 | 1 | 3 |
| <u>FZD5</u>     | 0 | 0 | 0 | 0 | 0 | 0 | 1 | 1 | 0 | 1 | 3 |
| <u>PURA</u>     | 0 | 0 | 0 | 0 | 0 | 0 | 1 | 1 | 1 | 0 | 3 |
| <u>CAPN7</u>    | 0 | 0 | 0 | 0 | 0 | 0 | 1 | 1 | 0 | 1 | 3 |
| <u>HHAT</u>     | 0 | 0 | 0 | 0 | 0 | 0 | 1 | 1 | 0 | 1 | 3 |
| <u>TRAM2</u>    | 0 | 0 | 0 | 0 | 0 | 0 | 1 | 1 | 0 | 1 | 3 |
| <u>ERC1</u>     | 0 | 0 | 0 | 0 | 0 | 0 | 1 | 1 | 0 | 1 | 3 |
| <u>PLS3</u>     | 0 | 0 | 0 | 0 | 0 | 0 | 1 | 0 | 1 | 1 | 3 |
| <u>MLL4</u>     | 0 | 0 | 0 | 0 | 0 | 0 | 1 | 0 | 1 | 1 | 3 |
| <u>UBTF</u>     | 0 | 0 | 0 | 0 | 0 | 0 | 1 | 1 | 0 | 1 | 3 |
| <u>CES3</u>     | 0 | 0 | 0 | 0 | 0 | 0 | 1 | 1 | 0 | 1 | 3 |
| <u>DIO3</u>     | 0 | 0 | 0 | 0 | 0 | 0 | 1 | 1 | 0 | 1 | 3 |
| <u>SEMA3A</u>   | 0 | 0 | 0 | 0 | 0 | 0 | 1 | 0 | 1 | 1 | 3 |
| <u>CCDC146</u>  | 0 | 0 | 0 | 0 | 0 | 0 | 0 | 1 | 1 | 1 | 3 |



|                 |   |   |   |   |   |   |   |   |   |   |   |
|-----------------|---|---|---|---|---|---|---|---|---|---|---|
| <u>HDHD2</u>    | 0 | 0 | 0 | 0 | 0 | 0 | 0 | 1 | 1 | 1 | 3 |
| <u>PDCD6</u>    | 0 | 1 | 0 | 1 | 0 | 0 | 0 | 0 | 0 | 0 | 2 |
| <u>HCN4</u>     | 0 | 1 | 0 | 1 | 0 | 0 | 0 | 0 | 0 | 0 | 2 |
| <u>HMG2L1</u>   | 0 | 0 | 0 | 1 | 0 | 0 | 0 | 0 | 0 | 1 | 2 |
| <u>HMG2L1</u>   | 0 | 0 | 0 | 1 | 0 | 0 | 0 | 0 | 0 | 1 | 2 |
| <u>SH2D3C</u>   | 1 | 0 | 0 | 1 | 0 | 0 | 0 | 0 | 0 | 0 | 2 |
| <u>SMC4</u>     | 1 | 0 | 0 | 1 | 0 | 0 | 0 | 0 | 0 | 0 | 2 |
| <u>GPC6</u>     | 0 | 1 | 0 | 1 | 0 | 0 | 0 | 0 | 0 | 0 | 2 |
| <u>SGK2</u>     | 1 | 0 | 0 | 1 | 0 | 0 | 0 | 0 | 0 | 0 | 2 |
| <u>AKAP9</u>    | 1 | 0 | 0 | 1 | 0 | 0 | 0 | 0 | 0 | 0 | 2 |
| <u>CDH17</u>    | 0 | 1 | 0 | 1 | 0 | 0 | 0 | 0 | 0 | 0 | 2 |
| <u>ODZ1</u>     | 1 | 0 | 0 | 1 | 0 | 0 | 0 | 0 | 0 | 0 | 2 |
| <u>PAK4</u>     | 0 | 0 | 0 | 1 | 0 | 0 | 0 | 0 | 0 | 1 | 2 |
| <u>B3GALT5</u>  | 0 | 0 | 0 | 1 | 0 | 0 | 0 | 0 | 0 | 1 | 2 |
| <u>B3GALT5</u>  | 0 | 0 | 0 | 1 | 0 | 0 | 0 | 0 | 0 | 1 | 2 |
| <u>MRV11</u>    | 0 | 1 | 0 | 1 | 0 | 0 | 0 | 0 | 0 | 0 | 2 |
| <u>ADARB1</u>   | 0 | 0 | 0 | 1 | 0 | 0 | 0 | 0 | 0 | 1 | 2 |
| <u>CDS1</u>     | 0 | 1 | 0 | 1 | 0 | 0 | 0 | 0 | 0 | 0 | 2 |
| <u>SEC24B</u>   | 1 | 0 | 0 | 1 | 0 | 0 | 0 | 0 | 0 | 0 | 2 |
| <u>RBM14</u>    | 0 | 1 | 0 | 1 | 0 | 0 | 0 | 0 | 0 | 0 | 2 |
| <u>VAV3</u>     | 1 | 0 | 0 | 1 | 0 | 0 | 0 | 0 | 0 | 0 | 2 |
| <u>CAP1</u>     | 1 | 0 | 0 | 1 | 0 | 0 | 0 | 0 | 0 | 0 | 2 |
| <u>TACC2</u>    | 0 | 1 | 0 | 1 | 0 | 0 | 0 | 0 | 0 | 0 | 2 |
| <u>ERLIN1</u>   | 1 | 0 | 0 | 1 | 0 | 0 | 0 | 0 | 0 | 0 | 2 |
| <u>RAD51AP1</u> | 1 | 0 | 0 | 1 | 0 | 0 | 0 | 0 | 0 | 0 | 2 |
| <u>MTX2</u>     | 0 | 0 | 0 | 1 | 0 | 0 | 0 | 0 | 0 | 1 | 2 |
| <u>KLRA1</u>    | 0 | 0 | 0 | 1 | 0 | 0 | 0 | 0 | 0 | 1 | 2 |
| <u>ZNF271</u>   | 0 | 0 | 0 | 1 | 0 | 0 | 0 | 0 | 0 | 1 | 2 |
| <u>ZNF271</u>   | 0 | 0 | 0 | 1 | 0 | 0 | 0 | 0 | 0 | 1 | 2 |
| <u>WDR4</u>     | 1 | 0 | 0 | 1 | 0 | 0 | 0 | 0 | 0 | 0 | 2 |
| <u>SFRS2B</u>   | 0 | 1 | 0 | 1 | 0 | 0 | 0 | 0 | 0 | 0 | 2 |
| <u>C11orf58</u> | 0 | 1 | 0 | 1 | 0 | 0 | 0 | 0 | 0 | 0 | 2 |
| <u>AP3M2</u>    | 0 | 0 | 0 | 1 | 0 | 0 | 0 | 0 | 0 | 1 | 2 |
| <u>LILRB3</u>   | 0 | 0 | 0 | 1 | 0 | 0 | 0 | 0 | 0 | 1 | 2 |
| <u>MID2</u>     | 0 | 1 | 0 | 1 | 0 | 0 | 0 | 0 | 0 | 0 | 2 |
| <u>DDX52</u>    | 0 | 0 | 0 | 1 | 0 | 0 | 0 | 0 | 0 | 1 | 2 |
| <u>WWP1</u>     | 0 | 0 | 0 | 1 | 0 | 0 | 0 | 0 | 0 | 1 | 2 |
| <u>ZWINT</u>    | 1 | 0 | 0 | 1 | 0 | 0 | 0 | 0 | 0 | 0 | 2 |
| <u>INMT</u>     | 0 | 1 | 0 | 1 | 0 | 0 | 0 | 0 | 0 | 0 | 2 |
| <u>CHKB</u>     | 0 | 0 | 0 | 1 | 0 | 0 | 0 | 0 | 0 | 1 | 2 |
| <u>RNF24</u>    | 0 | 0 | 0 | 1 | 0 | 0 | 0 | 0 | 0 | 1 | 2 |

|                 |   |   |   |   |   |   |   |   |   |   |   |
|-----------------|---|---|---|---|---|---|---|---|---|---|---|
| <u>RNF24</u>    | 0 | 0 | 0 | 1 | 0 | 0 | 0 | 0 | 0 | 1 | 2 |
| <u>CHN2</u>     | 1 | 0 | 0 | 1 | 0 | 0 | 0 | 0 | 0 | 0 | 2 |
| <u>KLF8</u>     | 0 | 1 | 0 | 1 | 0 | 0 | 0 | 0 | 0 | 0 | 2 |
| <u>MED8</u>     | 0 | 0 | 0 | 1 | 1 | 0 | 0 | 0 | 0 | 0 | 2 |
| <u>RNF13</u>    | 0 | 0 | 0 | 1 | 0 | 0 | 0 | 0 | 0 | 1 | 2 |
| <u>RNF13</u>    | 0 | 0 | 0 | 1 | 0 | 0 | 0 | 0 | 0 | 1 | 2 |
| <u>PALM2</u>    | 0 | 0 | 0 | 1 | 0 | 0 | 0 | 0 | 0 | 1 | 2 |
| <u>PWWP2A</u>   | 0 | 0 | 0 | 1 | 0 | 0 | 0 | 0 | 0 | 1 | 2 |
| <u>FHAD1</u>    | 0 | 1 | 0 | 1 | 0 | 0 | 0 | 0 | 0 | 0 | 2 |
| <u>C1QTNF3</u>  | 1 | 0 | 0 | 1 | 0 | 0 | 0 | 0 | 0 | 0 | 2 |
| <u>CIDEA</u>    | 1 | 0 | 0 | 1 | 0 | 0 | 0 | 0 | 0 | 0 | 2 |
| <u>CIDEA</u>    | 0 | 1 | 0 | 1 | 0 | 0 | 0 | 0 | 0 | 0 | 2 |
| <u>FAM122A</u>  | 0 | 1 | 0 | 1 | 0 | 0 | 0 | 0 | 0 | 0 | 2 |
| <u>CENTD1</u>   | 0 | 0 | 0 | 1 | 0 | 0 | 0 | 0 | 0 | 1 | 2 |
| <u>GALNTL2</u>  | 0 | 1 | 0 | 1 | 0 | 0 | 0 | 0 | 0 | 0 | 2 |
| <u>CCR3</u>     | 0 | 0 | 0 | 1 | 0 | 0 | 0 | 0 | 0 | 1 | 2 |
| <u>CCR6</u>     | 1 | 0 | 0 | 1 | 0 | 0 | 0 | 0 | 0 | 0 | 2 |
| <u>C18orf19</u> | 0 | 1 | 0 | 1 | 0 | 0 | 0 | 0 | 0 | 0 | 2 |
| <u>C18orf37</u> | 1 | 0 | 0 | 1 | 0 | 0 | 0 | 0 | 0 | 0 | 2 |
| <u>IRGQ</u>     | 0 | 1 | 0 | 1 | 0 | 0 | 0 | 0 | 0 | 0 | 2 |
| <u>C19orf28</u> | 0 | 1 | 0 | 1 | 0 | 0 | 0 | 0 | 0 | 0 | 2 |
| <u>FLJ44379</u> | 0 | 1 | 0 | 1 | 0 | 0 | 0 | 0 | 0 | 0 | 2 |
| <u>LIN54</u>    | 1 | 0 | 0 | 1 | 0 | 0 | 0 | 0 | 0 | 0 | 2 |
| <u>LIN54</u>    | 1 | 0 | 0 | 1 | 0 | 0 | 0 | 0 | 0 | 0 | 2 |
| <u>STXBP5</u>   | 0 | 1 | 0 | 1 | 0 | 0 | 0 | 0 | 0 | 0 | 2 |
| <u>NCOA7</u>    | 0 | 0 | 0 | 1 | 0 | 0 | 0 | 0 | 0 | 1 | 2 |
| <u>SRrp35</u>   | 0 | 1 | 0 | 1 | 0 | 0 | 0 | 0 | 0 | 0 | 2 |
| <u>COX15</u>    | 0 | 1 | 0 | 1 | 0 | 0 | 0 | 0 | 0 | 0 | 2 |
| <u>COX15</u>    | 0 | 1 | 0 | 1 | 0 | 0 | 0 | 0 | 0 | 0 | 2 |
| <u>CPB2</u>     | 0 | 1 | 0 | 1 | 0 | 0 | 0 | 0 | 0 | 0 | 2 |
| <u>CPT1A</u>    | 0 | 1 | 0 | 1 | 0 | 0 | 0 | 0 | 0 | 0 | 2 |
| <u>VPS37A</u>   | 0 | 1 | 0 | 1 | 0 | 0 | 0 | 0 | 0 | 0 | 2 |
| <u>CPT1B</u>    | 0 | 0 | 0 | 1 | 0 | 0 | 0 | 0 | 0 | 1 | 2 |
| <u>CREM</u>     | 1 | 0 | 0 | 1 | 0 | 0 | 0 | 0 | 0 | 0 | 2 |
| <u>CREM</u>     | 1 | 0 | 0 | 1 | 0 | 0 | 0 | 0 | 0 | 0 | 2 |
| <u>CREM</u>     | 1 | 0 | 0 | 1 | 0 | 0 | 0 | 0 | 0 | 0 | 2 |
| <u>CREM</u>     | 1 | 0 | 0 | 1 | 0 | 0 | 0 | 0 | 0 | 0 | 2 |
| <u>CREM</u>     | 1 | 0 | 0 | 1 | 0 | 0 | 0 | 0 | 0 | 0 | 2 |
| <u>CREM</u>     | 1 | 0 | 0 | 1 | 0 | 0 | 0 | 0 | 0 | 0 | 2 |
| <u>CREM</u>     | 1 | 0 | 0 | 1 | 0 | 0 | 0 | 0 | 0 | 0 | 2 |
| <u>CREM</u>     | 1 | 0 | 0 | 1 | 0 | 0 | 0 | 0 | 0 | 0 | 2 |
| <u>HAPLN1</u>   | 0 | 1 | 0 | 1 | 0 | 0 | 0 | 0 | 0 | 0 | 2 |

|                  |   |   |   |   |   |   |   |   |   |   |   |
|------------------|---|---|---|---|---|---|---|---|---|---|---|
| <u>ASB7</u>      | 0 | 1 | 0 | 1 | 0 | 0 | 0 | 0 | 0 | 0 | 2 |
| <u>MYO3B</u>     | 1 | 0 | 0 | 1 | 0 | 0 | 0 | 0 | 0 | 0 | 2 |
| <u>C20orf112</u> | 0 | 1 | 0 | 1 | 0 | 0 | 0 | 0 | 0 | 0 | 2 |
| <u>SIRPA</u>     | 1 | 0 | 0 | 1 | 0 | 0 | 0 | 0 | 0 | 0 | 2 |
| <u>SIRPA</u>     | 1 | 0 | 0 | 1 | 0 | 0 | 0 | 0 | 0 | 0 | 2 |
| <u>DNHD1</u>     | 1 | 0 | 0 | 1 | 0 | 0 | 0 | 0 | 0 | 0 | 2 |
| <u>WDR66</u>     | 0 | 1 | 0 | 1 | 0 | 0 | 0 | 0 | 0 | 0 | 2 |
| <u>B3GALTL</u>   | 0 | 1 | 0 | 1 | 0 | 0 | 0 | 0 | 0 | 0 | 2 |
| <u>VCAN</u>      | 0 | 1 | 0 | 1 | 0 | 0 | 0 | 0 | 0 | 0 | 2 |
| <u>TOM1L2</u>    | 0 | 0 | 0 | 1 | 0 | 0 | 0 | 0 | 0 | 1 | 2 |
| <u>CTH</u>       | 1 | 0 | 0 | 1 | 0 | 0 | 0 | 0 | 0 | 0 | 2 |
| <u>CCDC17</u>    | 0 | 0 | 0 | 1 | 0 | 0 | 0 | 0 | 0 | 1 | 2 |
| <u>CTNND1</u>    | 0 | 0 | 0 | 1 | 0 | 0 | 0 | 0 | 0 | 1 | 2 |
| <u>CTNND1</u>    | 0 | 0 | 0 | 1 | 0 | 0 | 0 | 0 | 0 | 1 | 2 |
| <u>CTNND1</u>    | 0 | 0 | 0 | 1 | 0 | 0 | 0 | 0 | 0 | 1 | 2 |
| <u>CTNND1</u>    | 0 | 0 | 0 | 1 | 0 | 0 | 0 | 0 | 0 | 1 | 2 |
| <u>CTNND1</u>    | 0 | 0 | 0 | 1 | 0 | 0 | 0 | 0 | 0 | 1 | 2 |
| <u>CTNND1</u>    | 0 | 0 | 0 | 1 | 0 | 0 | 0 | 0 | 0 | 1 | 2 |
| <u>NFAM1</u>     | 0 | 1 | 0 | 1 | 0 | 0 | 0 | 0 | 0 | 0 | 2 |
| <u>TTC30B</u>    | 0 | 1 | 0 | 1 | 0 | 0 | 0 | 0 | 0 | 0 | 2 |
| <u>ZNF385B</u>   | 1 | 0 | 0 | 1 | 0 | 0 | 0 | 0 | 0 | 0 | 2 |
| <u>ZNF385B</u>   | 1 | 0 | 0 | 1 | 0 | 0 | 0 | 0 | 0 | 0 | 2 |
| <u>FAM119A</u>   | 0 | 0 | 0 | 1 | 0 | 0 | 0 | 0 | 0 | 1 | 2 |
| <u>SGOL2</u>     | 0 | 1 | 0 | 1 | 0 | 0 | 0 | 0 | 0 | 0 | 2 |
| <u>CCDC50</u>    | 0 | 1 | 0 | 1 | 0 | 0 | 0 | 0 | 0 | 0 | 2 |
| <u>CCDC112</u>   | 1 | 0 | 0 | 1 | 0 | 0 | 0 | 0 | 0 | 0 | 2 |
| <u>RUNDC3B</u>   | 0 | 1 | 0 | 1 | 0 | 0 | 0 | 0 | 0 | 0 | 2 |
| <u>RPESP</u>     | 0 | 1 | 0 | 1 | 0 | 0 | 0 | 0 | 0 | 0 | 2 |
| <u>CYP26A1</u>   | 0 | 0 | 0 | 1 | 0 | 0 | 0 | 0 | 0 | 1 | 2 |
| <u>DACH1</u>     | 1 | 0 | 0 | 1 | 0 | 0 | 0 | 0 | 0 | 0 | 2 |
| <u>DACH1</u>     | 1 | 0 | 0 | 1 | 0 | 0 | 0 | 0 | 0 | 0 | 2 |
| <u>CLEC12A</u>   | 0 | 0 | 0 | 1 | 0 | 0 | 0 | 0 | 0 | 1 | 2 |
| <u>DGKB</u>      | 0 | 1 | 0 | 1 | 0 | 0 | 0 | 0 | 0 | 0 | 2 |
| <u>DAXX</u>      | 1 | 0 | 0 | 1 | 0 | 0 | 0 | 0 | 0 | 0 | 2 |
| <u>DDX5</u>      | 0 | 1 | 0 | 1 | 0 | 0 | 0 | 0 | 0 | 0 | 2 |
| <u>AES</u>       | 0 | 0 | 0 | 1 | 0 | 0 | 0 | 0 | 0 | 1 | 2 |
| <u>PSORS1C1</u>  | 0 | 1 | 0 | 1 | 0 | 0 | 0 | 0 | 0 | 0 | 2 |
| <u>DIO2</u>      | 0 | 0 | 0 | 1 | 0 | 0 | 0 | 0 | 0 | 1 | 2 |
| <u>ACAN</u>      | 0 | 0 | 0 | 1 | 0 | 0 | 0 | 0 | 0 | 1 | 2 |
| <u>TRDMT1</u>    | 0 | 0 | 0 | 1 | 0 | 0 | 0 | 0 | 0 | 1 | 2 |
| <u>TRDMT1</u>    | 0 | 0 | 0 | 1 | 0 | 0 | 0 | 0 | 0 | 1 | 2 |
| <u>DPP6</u>      | 0 | 0 | 0 | 1 | 0 | 0 | 0 | 0 | 0 | 1 | 2 |

|                 |   |   |   |   |   |   |   |   |   |   |   |
|-----------------|---|---|---|---|---|---|---|---|---|---|---|
| <u>AGTR1</u>    | 0 | 0 | 0 | 1 | 0 | 0 | 0 | 0 | 0 | 1 | 2 |
| <u>AGTR1</u>    | 0 | 0 | 0 | 1 | 0 | 0 | 0 | 0 | 0 | 1 | 2 |
| <u>E2F5</u>     | 0 | 0 | 0 | 1 | 0 | 0 | 0 | 0 | 0 | 1 | 2 |
| <u>EDA</u>      | 1 | 0 | 0 | 1 | 0 | 0 | 0 | 0 | 0 | 0 | 2 |
| <u>EDNRB</u>    | 1 | 0 | 0 | 1 | 0 | 0 | 0 | 0 | 0 | 0 | 2 |
| <u>FAM76A</u>   | 1 | 0 | 0 | 1 | 0 | 0 | 0 | 0 | 0 | 0 | 2 |
| <u>SLC39A11</u> | 1 | 0 | 0 | 1 | 0 | 0 | 0 | 0 | 0 | 0 | 2 |
| <u>EMP2</u>     | 0 | 1 | 0 | 1 | 0 | 0 | 0 | 0 | 0 | 0 | 2 |
| <u>ESRRG</u>    | 1 | 0 | 0 | 1 | 0 | 0 | 0 | 0 | 0 | 0 | 2 |
| <u>ESRRG</u>    | 1 | 0 | 0 | 1 | 0 | 0 | 0 | 0 | 0 | 0 | 2 |
| <u>EXT2</u>     | 0 | 0 | 0 | 1 | 0 | 0 | 0 | 0 | 0 | 1 | 2 |
| <u>FANCF</u>    | 0 | 1 | 0 | 1 | 0 | 0 | 0 | 0 | 0 | 0 | 2 |
| <u>UNC5B</u>    | 0 | 1 | 0 | 1 | 0 | 0 | 0 | 0 | 0 | 0 | 2 |
| <u>DOK6</u>     | 0 | 1 | 0 | 1 | 0 | 0 | 0 | 0 | 0 | 0 | 2 |
| <u>OPN5</u>     | 0 | 0 | 0 | 1 | 0 | 0 | 0 | 0 | 0 | 1 | 2 |
| <u>FKTN</u>     | 0 | 0 | 0 | 1 | 0 | 0 | 0 | 0 | 0 | 1 | 2 |
| <u>C10orf30</u> | 0 | 1 | 0 | 1 | 0 | 0 | 0 | 0 | 0 | 0 | 2 |
| <u>FGF9</u>     | 0 | 1 | 0 | 1 | 0 | 0 | 0 | 0 | 0 | 0 | 2 |
| <u>ICK</u>      | 1 | 0 | 0 | 1 | 0 | 0 | 0 | 0 | 0 | 0 | 2 |
| <u>RUFY3</u>    | 0 | 1 | 0 | 1 | 0 | 0 | 0 | 0 | 0 | 0 | 2 |
| <u>LIMCH1</u>   | 0 | 0 | 0 | 1 | 0 | 0 | 0 | 0 | 0 | 1 | 2 |
| <u>LIMCH1</u>   | 0 | 0 | 0 | 1 | 0 | 0 | 0 | 0 | 0 | 1 | 2 |
| <u>LIMCH1</u>   | 0 | 0 | 0 | 1 | 0 | 0 | 0 | 0 | 0 | 1 | 2 |
| <u>LIMCH1</u>   | 0 | 0 | 0 | 1 | 0 | 0 | 0 | 0 | 0 | 1 | 2 |
| <u>WDFY3</u>    | 0 | 0 | 0 | 1 | 0 | 0 | 0 | 0 | 0 | 1 | 2 |
| <u>TMCC1</u>    | 0 | 0 | 0 | 1 | 0 | 0 | 0 | 0 | 0 | 1 | 2 |
| <u>XPO7</u>     | 0 | 0 | 0 | 1 | 0 | 0 | 0 | 0 | 0 | 1 | 2 |
| <u>XPO7</u>     | 0 | 0 | 0 | 1 | 0 | 0 | 0 | 0 | 0 | 1 | 2 |
| <u>PEG10</u>    | 0 | 0 | 0 | 1 | 0 | 0 | 0 | 0 | 0 | 1 | 2 |
| <u>GARNL4</u>   | 0 | 0 | 0 | 1 | 0 | 0 | 0 | 0 | 0 | 1 | 2 |
| <u>FBXO28</u>   | 0 | 1 | 0 | 1 | 0 | 0 | 0 | 0 | 0 | 0 | 2 |
| <u>IQCE</u>     | 0 | 0 | 0 | 1 | 0 | 0 | 0 | 0 | 0 | 1 | 2 |
| <u>SF3B3</u>    | 0 | 1 | 0 | 1 | 0 | 0 | 0 | 0 | 0 | 0 | 2 |
| <u>ABCA5</u>    | 0 | 1 | 0 | 1 | 0 | 0 | 0 | 0 | 0 | 0 | 2 |
| <u>CBX5</u>     | 0 | 1 | 0 | 1 | 0 | 0 | 0 | 0 | 0 | 0 | 2 |
| <u>NNT</u>      | 0 | 0 | 0 | 1 | 0 | 0 | 0 | 0 | 0 | 1 | 2 |
| <u>DDAH1</u>    | 0 | 0 | 0 | 1 | 0 | 0 | 0 | 0 | 0 | 1 | 2 |
| <u>FPRL1</u>    | 0 | 0 | 0 | 1 | 0 | 0 | 0 | 0 | 0 | 1 | 2 |
| <u>PATZ1</u>    | 0 | 1 | 0 | 1 | 0 | 0 | 0 | 0 | 0 | 0 | 2 |
| <u>RUSC1</u>    | 0 | 0 | 0 | 1 | 0 | 0 | 0 | 0 | 0 | 1 | 2 |
| <u>RUSC1</u>    | 0 | 0 | 0 | 1 | 0 | 0 | 0 | 0 | 0 | 1 | 2 |

|                 |   |   |   |   |   |   |   |   |   |   |   |
|-----------------|---|---|---|---|---|---|---|---|---|---|---|
| <u>RUSC1</u>    | 0 | 0 | 0 | 1 | 0 | 0 | 0 | 0 | 0 | 1 | 2 |
| <u>GAB1</u>     | 0 | 1 | 0 | 1 | 0 | 0 | 0 | 0 | 0 | 0 | 2 |
| <u>MFSD8</u>    | 0 | 1 | 0 | 1 | 0 | 0 | 0 | 0 | 0 | 0 | 2 |
| <u>KLK5</u>     | 1 | 0 | 0 | 1 | 0 | 0 | 0 | 0 | 0 | 0 | 2 |
| <u>KLK5</u>     | 1 | 0 | 0 | 1 | 0 | 0 | 0 | 0 | 0 | 0 | 2 |
| <u>ARIH1</u>    | 0 | 1 | 0 | 1 | 0 | 0 | 0 | 0 | 0 | 0 | 2 |
| <u>PRDX5</u>    | 1 | 0 | 0 | 1 | 0 | 0 | 0 | 0 | 0 | 0 | 2 |
| <u>PRDX5</u>    | 1 | 0 | 0 | 1 | 0 | 0 | 0 | 0 | 0 | 0 | 2 |
| <u>GALK2</u>    | 1 | 0 | 0 | 1 | 0 | 0 | 0 | 0 | 0 | 0 | 2 |
| <u>RCHY1</u>    | 1 | 0 | 0 | 1 | 0 | 0 | 0 | 0 | 0 | 0 | 2 |
| <u>IFFO</u>     | 0 | 0 | 0 | 1 | 0 | 0 | 0 | 0 | 0 | 1 | 2 |
| <u>SFRS18</u>   | 0 | 0 | 0 | 1 | 0 | 0 | 0 | 0 | 0 | 1 | 2 |
| <u>TMEM87A</u>  | 0 | 1 | 0 | 1 | 0 | 0 | 0 | 0 | 0 | 0 | 2 |
| <u>LOC26010</u> | 0 | 0 | 0 | 1 | 0 | 0 | 0 | 0 | 0 | 1 | 2 |
| <u>LOC26010</u> | 0 | 0 | 0 | 1 | 0 | 0 | 0 | 0 | 0 | 1 | 2 |
| <u>LOC26010</u> | 0 | 0 | 0 | 1 | 0 | 0 | 0 | 0 | 0 | 1 | 2 |
| <u>SETBP1</u>   | 0 | 1 | 0 | 1 | 0 | 0 | 0 | 0 | 0 | 0 | 2 |
| <u>GIGYF2</u>   | 0 | 0 | 0 | 1 | 0 | 0 | 0 | 0 | 0 | 1 | 2 |
| <u>GIGYF2</u>   | 0 | 0 | 0 | 1 | 0 | 0 | 0 | 0 | 0 | 1 | 2 |
| <u>GIGYF2</u>   | 0 | 0 | 0 | 1 | 0 | 0 | 0 | 0 | 0 | 1 | 2 |
| <u>SGEF</u>     | 0 | 1 | 0 | 1 | 0 | 0 | 0 | 0 | 0 | 0 | 2 |
| <u>HERC4</u>    | 1 | 0 | 0 | 1 | 0 | 0 | 0 | 0 | 0 | 0 | 2 |
| <u>TTLL3</u>    | 0 | 0 | 0 | 1 | 0 | 0 | 0 | 0 | 0 | 1 | 2 |
| <u>FBXL5</u>    | 0 | 0 | 0 | 1 | 0 | 0 | 0 | 0 | 0 | 1 | 2 |
| <u>FBXO24</u>   | 1 | 0 | 0 | 1 | 0 | 0 | 0 | 0 | 0 | 0 | 2 |
| <u>GFPT1</u>    | 0 | 1 | 0 | 1 | 0 | 0 | 0 | 0 | 0 | 0 | 2 |
| <u>GFRA1</u>    | 0 | 0 | 0 | 1 | 0 | 0 | 0 | 0 | 0 | 1 | 2 |
| <u>ABL2</u>     | 0 | 0 | 0 | 1 | 0 | 0 | 0 | 0 | 0 | 1 | 2 |
| <u>EIF2AK1</u>  | 0 | 0 | 0 | 1 | 0 | 0 | 0 | 0 | 0 | 1 | 2 |
| <u>CECR2</u>    | 0 | 0 | 0 | 1 | 0 | 0 | 0 | 0 | 0 | 1 | 2 |
| <u>GNAO1</u>    | 0 | 1 | 0 | 1 | 0 | 0 | 0 | 0 | 0 | 0 | 2 |
| <u>GNAO1</u>    | 0 | 1 | 0 | 1 | 0 | 0 | 0 | 0 | 0 | 0 | 2 |
| <u>GNAT1</u>    | 0 | 1 | 0 | 1 | 0 | 0 | 0 | 0 | 0 | 0 | 2 |
| <u>GNAT1</u>    | 0 | 1 | 0 | 1 | 0 | 0 | 0 | 0 | 0 | 0 | 2 |
| <u>SLCO3A1</u>  | 0 | 1 | 0 | 1 | 0 | 0 | 0 | 0 | 0 | 0 | 2 |
| <u>GLT8D3</u>   | 0 | 0 | 0 | 1 | 0 | 0 | 0 | 0 | 0 | 1 | 2 |
| <u>LYPD5</u>    | 0 | 0 | 0 | 1 | 0 | 0 | 0 | 0 | 0 | 1 | 2 |
| <u>ZNF621</u>   | 1 | 0 | 0 | 1 | 0 | 0 | 0 | 0 | 0 | 0 | 2 |
| <u>C9orf126</u> | 0 | 1 | 0 | 1 | 0 | 0 | 0 | 0 | 0 | 0 | 2 |
| <u>MRPL42</u>   | 1 | 0 | 0 | 1 | 0 | 0 | 0 | 0 | 0 | 0 | 2 |
| <u>MRPL42</u>   | 1 | 0 | 0 | 1 | 0 | 0 | 0 | 0 | 0 | 0 | 2 |

|                |   |   |   |   |   |   |   |   |   |   |   |
|----------------|---|---|---|---|---|---|---|---|---|---|---|
| <u>MCTS1</u>   | 0 | 1 | 0 | 1 | 0 | 0 | 0 | 0 | 0 | 0 | 2 |
| <u>HIPK2</u>   | 0 | 0 | 0 | 1 | 0 | 0 | 0 | 0 | 0 | 1 | 2 |
| <u>GRIN2A</u>  | 1 | 0 | 0 | 1 | 0 | 0 | 0 | 0 | 0 | 0 | 2 |
| <u>MRPL22</u>  | 0 | 1 | 0 | 1 | 0 | 0 | 0 | 0 | 0 | 0 | 2 |
| <u>TAGLN3</u>  | 1 | 0 | 0 | 1 | 0 | 0 | 0 | 0 | 0 | 0 | 2 |
| <u>TAGLN3</u>  | 1 | 0 | 0 | 1 | 0 | 0 | 0 | 0 | 0 | 0 | 2 |
| <u>RACGAP1</u> | 1 | 0 | 0 | 1 | 0 | 0 | 0 | 0 | 0 | 0 | 2 |
| <u>RACGAP1</u> | 1 | 0 | 0 | 1 | 0 | 0 | 0 | 0 | 0 | 0 | 2 |
| <u>GRM8</u>    | 0 | 1 | 0 | 1 | 0 | 0 | 0 | 0 | 0 | 0 | 2 |
| <u>GSK3B</u>   | 0 | 1 | 0 | 1 | 0 | 0 | 0 | 0 | 0 | 0 | 2 |
| <u>ALG6</u>    | 0 | 1 | 0 | 1 | 0 | 0 | 0 | 0 | 0 | 0 | 2 |
| <u>SH3KBP1</u> | 1 | 0 | 0 | 1 | 0 | 0 | 0 | 0 | 0 | 0 | 2 |
| <u>HBD</u>     | 0 | 1 | 0 | 1 | 0 | 0 | 0 | 0 | 0 | 0 | 2 |
| <u>EMR2</u>    | 0 | 0 | 0 | 1 | 0 | 0 | 0 | 0 | 0 | 1 | 2 |
| <u>EMR2</u>    | 0 | 0 | 0 | 1 | 0 | 0 | 0 | 0 | 0 | 1 | 2 |
| <u>ANXA6</u>   | 0 | 0 | 0 | 1 | 0 | 0 | 0 | 0 | 0 | 1 | 2 |
| <u>UBE2K</u>   | 0 | 0 | 0 | 1 | 0 | 0 | 0 | 0 | 0 | 1 | 2 |
| <u>EIF4E3</u>  | 1 | 0 | 0 | 1 | 0 | 0 | 0 | 0 | 0 | 0 | 2 |
| <u>EIF4E3</u>  | 1 | 0 | 0 | 1 | 0 | 0 | 0 | 0 | 0 | 0 | 2 |
| <u>HNRNPC</u>  | 0 | 0 | 0 | 1 | 0 | 0 | 0 | 0 | 0 | 1 | 2 |
| <u>HNRNPC</u>  | 0 | 0 | 0 | 1 | 0 | 0 | 0 | 0 | 0 | 1 | 2 |
| <u>APBA1</u>   | 0 | 1 | 0 | 1 | 0 | 0 | 0 | 0 | 0 | 0 | 2 |
| <u>PRMT2</u>   | 0 | 0 | 0 | 1 | 0 | 0 | 0 | 0 | 0 | 1 | 2 |
| <u>CHSY3</u>   | 0 | 1 | 0 | 1 | 0 | 0 | 0 | 0 | 0 | 0 | 2 |
| <u>IGFBP3</u>  | 1 | 0 | 0 | 1 | 0 | 0 | 0 | 0 | 0 | 0 | 2 |
| <u>FAS</u>     | 0 | 0 | 0 | 1 | 0 | 0 | 0 | 0 | 0 | 1 | 2 |
| <u>FAS</u>     | 0 | 0 | 0 | 1 | 0 | 0 | 0 | 0 | 0 | 1 | 2 |
| <u>FAS</u>     | 0 | 0 | 0 | 1 | 0 | 0 | 0 | 0 | 0 | 1 | 2 |
| <u>FAS</u>     | 0 | 0 | 0 | 1 | 0 | 0 | 0 | 0 | 0 | 1 | 2 |
| <u>AQP4</u>    | 0 | 0 | 0 | 1 | 0 | 0 | 0 | 0 | 0 | 1 | 2 |
| <u>ING1</u>    | 1 | 0 | 0 | 1 | 0 | 0 | 0 | 0 | 0 | 0 | 2 |
| <u>ING1</u>    | 1 | 0 | 0 | 1 | 0 | 0 | 0 | 0 | 0 | 0 | 2 |
| <u>INPP4A</u>  | 0 | 1 | 0 | 1 | 0 | 0 | 0 | 0 | 0 | 0 | 2 |
| <u>IRF5</u>    | 0 | 0 | 0 | 1 | 0 | 0 | 0 | 0 | 0 | 1 | 2 |
| <u>IRF5</u>    | 0 | 0 | 0 | 1 | 0 | 0 | 0 | 0 | 0 | 1 | 2 |
| <u>IRS1</u>    | 0 | 1 | 0 | 1 | 0 | 0 | 0 | 0 | 0 | 0 | 2 |
| <u>ITGB1</u>   | 0 | 1 | 0 | 1 | 0 | 0 | 0 | 0 | 0 | 0 | 2 |
| <u>KCNA3</u>   | 0 | 1 | 0 | 1 | 0 | 0 | 0 | 0 | 0 | 0 | 2 |
| <u>KCNA6</u>   | 0 | 1 | 0 | 1 | 0 | 0 | 0 | 0 | 0 | 0 | 2 |
| <u>KCNH1</u>   | 0 | 1 | 0 | 1 | 0 | 0 | 0 | 0 | 0 | 0 | 2 |
| <u>PTAR1</u>   | 0 | 1 | 0 | 1 | 0 | 0 | 0 | 0 | 0 | 0 | 2 |

|                  |   |   |   |   |   |   |   |   |   |   |   |
|------------------|---|---|---|---|---|---|---|---|---|---|---|
| <u>KIR2DL1</u>   | 0 | 0 | 0 | 1 | 0 | 0 | 0 | 0 | 0 | 1 | 2 |
| <u>CC2D2B</u>    | 1 | 0 | 0 | 1 | 0 | 0 | 0 | 0 | 0 | 0 | 2 |
| <u>LOC388503</u> | 0 | 0 | 0 | 1 | 0 | 0 | 0 | 0 | 0 | 1 | 2 |
| <u>LOC388969</u> | 0 | 1 | 0 | 1 | 0 | 0 | 0 | 0 | 0 | 0 | 2 |
| <u>LAMA3</u>     | 1 | 0 | 0 | 1 | 0 | 0 | 0 | 0 | 0 | 0 | 2 |
| <u>LAMA3</u>     | 1 | 0 | 0 | 1 | 0 | 0 | 0 | 0 | 0 | 0 | 2 |
| <u>LAMP2</u>     | 0 | 1 | 0 | 1 | 0 | 0 | 0 | 0 | 0 | 0 | 2 |
| <u>LAMP2</u>     | 0 | 1 | 0 | 1 | 0 | 0 | 0 | 0 | 0 | 0 | 2 |
| <u>ARHGAP6</u>   | 1 | 0 | 0 | 1 | 0 | 0 | 0 | 0 | 0 | 0 | 2 |
| <u>LIMK2</u>     | 1 | 0 | 0 | 1 | 0 | 0 | 0 | 0 | 0 | 0 | 2 |
| <u>FLJ45803</u>  | 0 | 1 | 0 | 1 | 0 | 0 | 0 | 0 | 0 | 0 | 2 |
| <u>FLJ42957</u>  | 0 | 0 | 0 | 1 | 0 | 0 | 0 | 0 | 0 | 1 | 2 |
| <u>FLJ13137</u>  | 0 | 0 | 0 | 1 | 0 | 0 | 0 | 0 | 0 | 1 | 2 |
| <u>C8orf59</u>   | 0 | 0 | 0 | 1 | 0 | 0 | 0 | 0 | 0 | 1 | 2 |
| <u>C8orf59</u>   | 0 | 0 | 0 | 1 | 0 | 0 | 0 | 0 | 0 | 1 | 2 |
| <u>C8orf59</u>   | 0 | 0 | 0 | 1 | 0 | 0 | 0 | 0 | 0 | 1 | 2 |
| <u>LOX</u>       | 0 | 1 | 0 | 1 | 0 | 0 | 0 | 0 | 0 | 0 | 2 |
| <u>GTF2H5</u>    | 0 | 1 | 0 | 1 | 0 | 0 | 0 | 0 | 0 | 0 | 2 |
| <u>SMAD5</u>     | 1 | 0 | 0 | 1 | 0 | 0 | 0 | 0 | 0 | 0 | 2 |
| <u>MAGEB1</u>    | 1 | 0 | 0 | 1 | 0 | 0 | 0 | 0 | 0 | 0 | 2 |
| <u>ARSD</u>      | 0 | 1 | 0 | 1 | 0 | 0 | 0 | 0 | 0 | 0 | 2 |
| <u>MATN2</u>     | 0 | 1 | 0 | 1 | 0 | 0 | 0 | 0 | 0 | 0 | 2 |
| <u>MCC</u>       | 0 | 0 | 0 | 1 | 0 | 0 | 0 | 0 | 0 | 1 | 2 |
| <u>CD46</u>      | 0 | 0 | 0 | 1 | 0 | 0 | 0 | 0 | 0 | 1 | 2 |
| <u>CD46</u>      | 0 | 0 | 0 | 1 | 0 | 0 | 0 | 0 | 0 | 1 | 2 |
| <u>CD46</u>      | 0 | 0 | 0 | 1 | 0 | 0 | 0 | 0 | 0 | 1 | 2 |
| <u>CD46</u>      | 0 | 0 | 0 | 1 | 0 | 0 | 0 | 0 | 0 | 1 | 2 |
| <u>MDM2</u>      | 0 | 1 | 0 | 1 | 0 | 0 | 0 | 0 | 0 | 0 | 2 |
| <u>MDM2</u>      | 0 | 1 | 0 | 1 | 0 | 0 | 0 | 0 | 0 | 0 | 2 |
| <u>MDM2</u>      | 0 | 1 | 0 | 1 | 0 | 0 | 0 | 0 | 0 | 0 | 2 |
| <u>MDM4</u>      | 0 | 1 | 0 | 1 | 0 | 0 | 0 | 0 | 0 | 0 | 2 |
| <u>MEF2A</u>     | 1 | 0 | 0 | 1 | 0 | 0 | 0 | 0 | 0 | 0 | 2 |
| <u>MEF2A</u>     | 1 | 0 | 0 | 1 | 0 | 0 | 0 | 0 | 0 | 0 | 2 |
| <u>MEF2A</u>     | 1 | 0 | 0 | 1 | 0 | 0 | 0 | 0 | 0 | 0 | 2 |
| <u>MFAP3</u>     | 0 | 1 | 0 | 1 | 0 | 0 | 0 | 0 | 0 | 0 | 2 |
| <u>MLLT4</u>     | 0 | 1 | 0 | 1 | 0 | 0 | 0 | 0 | 0 | 0 | 2 |
| <u>MME</u>       | 0 | 0 | 0 | 1 | 0 | 0 | 0 | 0 | 0 | 1 | 2 |
| <u>MME</u>       | 0 | 0 | 0 | 1 | 0 | 0 | 0 | 0 | 0 | 1 | 2 |
| <u>MME</u>       | 0 | 0 | 0 | 1 | 0 | 0 | 0 | 0 | 0 | 1 | 2 |
| <u>MTHFD2L</u>   | 0 | 0 | 0 | 1 | 0 | 0 | 0 | 0 | 0 | 1 | 2 |
| <u>ASPH</u>      | 0 | 1 | 0 | 1 | 0 | 0 | 0 | 0 | 0 | 0 | 2 |

|                 |   |   |   |   |   |   |   |   |   |   |   |
|-----------------|---|---|---|---|---|---|---|---|---|---|---|
| <u>ASPH</u>     | 0 | 1 | 0 | 1 | 0 | 0 | 0 | 0 | 0 | 0 | 2 |
| <u>MYL1</u>     | 1 | 0 | 0 | 1 | 0 | 0 | 0 | 0 | 0 | 0 | 2 |
| <u>ATF1</u>     | 0 | 1 | 0 | 1 | 0 | 0 | 0 | 0 | 0 | 0 | 2 |
| <u>NAP1L1</u>   | 0 | 1 | 0 | 1 | 0 | 0 | 0 | 0 | 0 | 0 | 2 |
| <u>NBL1</u>     | 1 | 0 | 0 | 1 | 0 | 0 | 0 | 0 | 0 | 0 | 2 |
| <u>NUBP1</u>    | 0 | 1 | 0 | 1 | 0 | 0 | 0 | 0 | 0 | 0 | 2 |
| <u>NBN</u>      | 0 | 0 | 0 | 1 | 0 | 0 | 0 | 0 | 0 | 1 | 2 |
| <u>ATM</u>      | 0 | 0 | 0 | 1 | 0 | 0 | 0 | 0 | 0 | 1 | 2 |
| <u>NELL2</u>    | 1 | 0 | 0 | 1 | 0 | 0 | 0 | 0 | 0 | 0 | 2 |
| <u>NF2</u>      | 0 | 1 | 0 | 1 | 0 | 0 | 0 | 0 | 0 | 0 | 2 |
| <u>NRCAM</u>    | 0 | 0 | 0 | 1 | 0 | 0 | 0 | 0 | 0 | 1 | 2 |
| <u>NTRK2</u>    | 0 | 0 | 0 | 1 | 0 | 0 | 0 | 0 | 0 | 1 | 2 |
| <u>OGN</u>      | 0 | 0 | 0 | 1 | 0 | 0 | 0 | 0 | 0 | 1 | 2 |
| <u>SPRN</u>     | 0 | 1 | 0 | 1 | 0 | 0 | 0 | 0 | 0 | 0 | 2 |
| <u>Dec-01</u>   | 0 | 1 | 0 | 1 | 0 | 0 | 0 | 0 | 0 | 0 | 2 |
| <u>TMEM16G</u>  | 0 | 1 | 0 | 1 | 0 | 0 | 0 | 0 | 0 | 0 | 2 |
| <u>PAX6</u>     | 0 | 1 | 0 | 1 | 0 | 0 | 0 | 0 | 0 | 0 | 2 |
| <u>F11R</u>     | 0 | 0 | 0 | 1 | 0 | 0 | 0 | 0 | 0 | 1 | 2 |
| <u>PBX1</u>     | 0 | 1 | 0 | 1 | 0 | 0 | 0 | 0 | 0 | 0 | 2 |
| <u>PCBP2</u>    | 0 | 1 | 0 | 1 | 0 | 0 | 0 | 0 | 0 | 0 | 2 |
| <u>PCDH7</u>    | 0 | 0 | 0 | 1 | 0 | 0 | 0 | 0 | 0 | 1 | 2 |
| <u>ABHD5</u>    | 0 | 1 | 0 | 1 | 0 | 0 | 0 | 0 | 0 | 0 | 2 |
| <u>METTL9</u>   | 1 | 0 | 0 | 1 | 0 | 0 | 0 | 0 | 0 | 0 | 2 |
| <u>SUV420H1</u> | 0 | 1 | 0 | 1 | 0 | 0 | 0 | 0 | 0 | 0 | 2 |
| <u>RNF12</u>    | 0 | 1 | 0 | 1 | 0 | 0 | 0 | 0 | 0 | 0 | 2 |
| <u>CCDC41</u>   | 0 | 0 | 0 | 1 | 0 | 0 | 0 | 0 | 0 | 1 | 2 |
| <u>IRAK4</u>    | 0 | 0 | 0 | 1 | 0 | 0 | 0 | 0 | 0 | 1 | 2 |
| <u>TUBE1</u>    | 0 | 1 | 0 | 1 | 0 | 0 | 0 | 0 | 0 | 0 | 2 |
| <u>ZNF639</u>   | 0 | 1 | 0 | 1 | 0 | 0 | 0 | 0 | 0 | 0 | 2 |
| <u>C5orf5</u>   | 1 | 0 | 0 | 1 | 0 | 0 | 0 | 0 | 0 | 0 | 2 |
| <u>C5orf5</u>   | 1 | 0 | 0 | 1 | 0 | 0 | 0 | 0 | 0 | 0 | 2 |
| <u>C4orf18</u>  | 1 | 0 | 0 | 1 | 0 | 0 | 0 | 0 | 0 | 0 | 2 |
| <u>C4orf18</u>  | 1 | 0 | 0 | 1 | 0 | 0 | 0 | 0 | 0 | 0 | 2 |
| <u>DACT1</u>    | 1 | 0 | 0 | 1 | 0 | 0 | 0 | 0 | 0 | 0 | 2 |
| <u>MBTPS2</u>   | 0 | 1 | 0 | 1 | 0 | 0 | 0 | 0 | 0 | 0 | 2 |
| <u>NCKIPSD</u>  | 1 | 0 | 0 | 1 | 0 | 0 | 0 | 0 | 0 | 0 | 2 |
| <u>ARMCX3</u>   | 0 | 0 | 0 | 1 | 0 | 0 | 0 | 0 | 0 | 1 | 2 |
| <u>AZIN1</u>    | 1 | 0 | 0 | 1 | 0 | 0 | 0 | 0 | 0 | 0 | 2 |
| <u>FKBP7</u>    | 0 | 1 | 0 | 1 | 0 | 0 | 0 | 0 | 0 | 0 | 2 |
| <u>CAB39</u>    | 1 | 0 | 0 | 1 | 0 | 0 | 0 | 0 | 0 | 0 | 2 |
| <u>CAB39</u>    | 1 | 0 | 0 | 1 | 0 | 0 | 0 | 0 | 0 | 0 | 2 |



|                    |   |   |   |   |   |   |   |   |   |   |   |
|--------------------|---|---|---|---|---|---|---|---|---|---|---|
| <u>PEG3</u>        | 1 | 0 | 0 | 1 | 0 | 0 | 0 | 0 | 0 | 0 | 2 |
| <u>PFKFB2</u>      | 0 | 0 | 0 | 1 | 0 | 0 | 0 | 0 | 0 | 1 | 2 |
| <u>SERPINA1</u>    | 0 | 1 | 0 | 1 | 0 | 0 | 0 | 0 | 0 | 0 | 2 |
| <u>SERPINI1</u>    | 1 | 0 | 0 | 1 | 0 | 0 | 0 | 0 | 0 | 0 | 2 |
| <u>PIP4K2A</u>     | 0 | 1 | 0 | 1 | 0 | 0 | 0 | 0 | 0 | 0 | 2 |
| <u>PLP1</u>        | 1 | 0 | 0 | 1 | 0 | 0 | 0 | 0 | 0 | 0 | 2 |
| <u>PNN</u>         | 0 | 1 | 0 | 1 | 0 | 0 | 0 | 0 | 0 | 0 | 2 |
| <u>FAM105A</u>     | 0 | 1 | 0 | 1 | 0 | 0 | 0 | 0 | 0 | 0 | 2 |
| <u>EGLN1</u>       | 0 | 1 | 0 | 1 | 0 | 0 | 0 | 0 | 0 | 0 | 2 |
| <u>FLJ20674</u>    | 0 | 1 | 0 | 1 | 0 | 0 | 0 | 0 | 0 | 0 | 2 |
| <u>A2BP1</u>       | 0 | 1 | 0 | 1 | 0 | 0 | 0 | 0 | 0 | 0 | 2 |
| <u>A2BP1</u>       | 0 | 1 | 0 | 1 | 0 | 0 | 0 | 0 | 0 | 0 | 2 |
| <u>C17orf59</u>    | 0 | 1 | 0 | 1 | 0 | 0 | 0 | 0 | 0 | 0 | 2 |
| <u>ZNF586</u>      | 0 | 0 | 0 | 1 | 0 | 0 | 0 | 0 | 0 | 1 | 2 |
| <u>ZNF280D</u>     | 0 | 0 | 0 | 1 | 0 | 0 | 0 | 0 | 0 | 1 | 2 |
| <u>RP11-35N6.1</u> | 1 | 0 | 0 | 1 | 0 | 0 | 0 | 0 | 0 | 0 | 2 |
| <u>CTF8</u>        | 1 | 0 | 0 | 1 | 0 | 0 | 0 | 0 | 0 | 0 | 2 |
| <u>CTF8</u>        | 0 | 1 | 0 | 1 | 0 | 0 | 0 | 0 | 0 | 0 | 2 |
| <u>CTF8</u>        | 1 | 0 | 0 | 1 | 0 | 0 | 0 | 0 | 0 | 0 | 2 |
| <u>PIGX</u>        | 0 | 1 | 0 | 1 | 0 | 0 | 0 | 0 | 0 | 0 | 2 |
| <u>ACPP</u>        | 1 | 0 | 0 | 1 | 0 | 0 | 0 | 0 | 0 | 0 | 2 |
| <u>PID1</u>        | 1 | 0 | 0 | 1 | 0 | 0 | 0 | 0 | 0 | 0 | 2 |
| <u>AIM1L</u>       | 0 | 0 | 0 | 1 | 0 | 0 | 0 | 0 | 0 | 1 | 2 |
| <u>C9orf40</u>     | 0 | 1 | 0 | 1 | 0 | 0 | 0 | 0 | 0 | 0 | 2 |
| <u>FLJ10213</u>    | 0 | 1 | 0 | 1 | 0 | 0 | 0 | 0 | 0 | 0 | 2 |
| <u>SLC25A36</u>    | 0 | 0 | 0 | 1 | 0 | 0 | 0 | 0 | 0 | 1 | 2 |
| <u>VPS13D</u>      | 1 | 0 | 0 | 1 | 0 | 0 | 0 | 0 | 0 | 0 | 2 |
| <u>BBS7</u>        | 0 | 1 | 0 | 1 | 0 | 0 | 0 | 0 | 0 | 0 | 2 |
| <u>LEPREL1</u>     | 0 | 1 | 0 | 1 | 0 | 0 | 0 | 0 | 0 | 0 | 2 |
| <u>PPP2R5C</u>     | 0 | 1 | 0 | 1 | 0 | 0 | 0 | 0 | 0 | 0 | 2 |
| <u>IMP3</u>        | 0 | 1 | 0 | 1 | 0 | 0 | 0 | 0 | 0 | 0 | 2 |
| <u>QRSL1</u>       | 0 | 1 | 0 | 1 | 0 | 0 | 0 | 0 | 0 | 0 | 2 |
| <u>FLJ11151</u>    | 0 | 0 | 0 | 1 | 0 | 0 | 0 | 0 | 0 | 1 | 2 |
| <u>PPP6C</u>       | 0 | 1 | 0 | 1 | 0 | 0 | 0 | 0 | 0 | 0 | 2 |
| <u>SLC35E3</u>     | 0 | 1 | 0 | 1 | 0 | 0 | 0 | 0 | 0 | 0 | 2 |
| <u>DDX43</u>       | 0 | 1 | 0 | 1 | 0 | 0 | 0 | 0 | 0 | 0 | 2 |
| <u>GALNT10</u>     | 0 | 0 | 0 | 1 | 0 | 0 | 0 | 0 | 0 | 1 | 2 |
| <u>KIAA1310</u>    | 1 | 0 | 0 | 1 | 0 | 0 | 0 | 0 | 0 | 0 | 2 |
| <u>C17orf63</u>    | 0 | 0 | 0 | 1 | 0 | 0 | 0 | 0 | 0 | 1 | 2 |
| <u>ZNF83</u>       | 0 | 0 | 0 | 1 | 0 | 0 | 0 | 0 | 0 | 1 | 2 |
| <u>ZNF83</u>       | 0 | 0 | 0 | 1 | 0 | 0 | 0 | 0 | 0 | 1 | 2 |



|                    |   |   |   |   |   |   |   |   |   |   |   |
|--------------------|---|---|---|---|---|---|---|---|---|---|---|
| <u>PTPRC</u>       | 0 | 0 | 0 | 1 | 0 | 0 | 0 | 0 | 0 | 1 | 2 |
| <u>PTPRD</u>       | 1 | 0 | 0 | 1 | 0 | 0 | 0 | 0 | 0 | 0 | 2 |
| <u>PTPRD</u>       | 1 | 0 | 0 | 1 | 0 | 0 | 0 | 0 | 0 | 0 | 2 |
| <u>PTPRD</u>       | 1 | 0 | 0 | 1 | 0 | 0 | 0 | 0 | 0 | 0 | 2 |
| <u>PTPRJ</u>       | 0 | 1 | 0 | 1 | 0 | 0 | 0 | 0 | 0 | 0 | 2 |
| <u>PVR</u>         | 0 | 1 | 0 | 1 | 0 | 0 | 0 | 0 | 0 | 0 | 2 |
| <u>PEX19</u>       | 0 | 0 | 0 | 1 | 0 | 0 | 0 | 0 | 0 | 1 | 2 |
| <u>PXMP3</u>       | 0 | 0 | 0 | 1 | 0 | 0 | 0 | 0 | 0 | 1 | 2 |
| <u>RBMS1</u>       | 0 | 1 | 0 | 1 | 0 | 0 | 0 | 0 | 0 | 0 | 2 |
| <u>RNASE4</u>      | 1 | 0 | 0 | 1 | 0 | 0 | 0 | 0 | 0 | 0 | 2 |
| <u>RNASE4</u>      | 1 | 0 | 0 | 1 | 0 | 0 | 0 | 0 | 0 | 0 | 2 |
| <u>RORA</u>        | 0 | 1 | 0 | 1 | 0 | 0 | 0 | 0 | 0 | 0 | 2 |
| <u>BDH1</u>        | 1 | 0 | 0 | 1 | 0 | 0 | 0 | 0 | 0 | 0 | 2 |
| <u>BDH1</u>        | 1 | 0 | 0 | 1 | 0 | 0 | 0 | 0 | 0 | 0 | 2 |
| <u>RTN1</u>        | 1 | 0 | 0 | 1 | 0 | 0 | 0 | 0 | 0 | 0 | 2 |
| <u>RTN1</u>        | 1 | 0 | 0 | 1 | 0 | 0 | 0 | 0 | 0 | 0 | 2 |
| <u>ATXN7</u>       | 0 | 1 | 0 | 1 | 0 | 0 | 0 | 0 | 0 | 0 | 2 |
| <u>SCP2</u>        | 0 | 1 | 0 | 1 | 0 | 0 | 0 | 0 | 0 | 0 | 2 |
| <u>SCP2</u>        | 0 | 1 | 0 | 1 | 0 | 0 | 0 | 0 | 0 | 0 | 2 |
| <u>NPAS3</u>       | 1 | 0 | 0 | 1 | 0 | 0 | 0 | 0 | 0 | 0 | 2 |
| <u>ERAP2</u>       | 0 | 1 | 0 | 1 | 0 | 0 | 0 | 0 | 0 | 0 | 2 |
| <u>ARL6IP2</u>     | 1 | 0 | 0 | 1 | 0 | 0 | 0 | 0 | 0 | 0 | 2 |
| <u>MS4A6A</u>      | 0 | 0 | 0 | 1 | 0 | 0 | 0 | 0 | 0 | 1 | 2 |
| <u>LOC643641</u>   | 0 | 1 | 0 | 1 | 0 | 0 | 0 | 0 | 0 | 0 | 2 |
| <u>hCG_1776018</u> | 0 | 1 | 0 | 1 | 0 | 0 | 0 | 0 | 0 | 0 | 2 |
| <u>SGK1</u>        | 1 | 0 | 0 | 1 | 0 | 0 | 0 | 0 | 0 | 0 | 2 |
| <u>C3orf65</u>     | 0 | 0 | 0 | 1 | 0 | 0 | 0 | 0 | 0 | 1 | 2 |
| <u>NUCKS1</u>      | 0 | 1 | 0 | 1 | 0 | 0 | 0 | 0 | 0 | 0 | 2 |
| <u>CRTC3</u>       | 0 | 1 | 0 | 1 | 0 | 0 | 0 | 0 | 0 | 0 | 2 |
| <u>C1orf176</u>    | 0 | 1 | 0 | 1 | 0 | 0 | 0 | 0 | 0 | 0 | 2 |
| <u>RABL5</u>       | 0 | 0 | 0 | 1 | 0 | 0 | 0 | 0 | 0 | 1 | 2 |
| <u>RMND5A</u>      | 0 | 1 | 0 | 1 | 0 | 0 | 0 | 0 | 0 | 0 | 2 |
| <u>PCDH15</u>      | 0 | 0 | 0 | 1 | 0 | 0 | 0 | 0 | 0 | 1 | 2 |
| <u>SLC12A3</u>     | 0 | 1 | 0 | 1 | 0 | 0 | 0 | 0 | 0 | 0 | 2 |
| <u>SLCO1A2</u>     | 0 | 1 | 0 | 1 | 0 | 0 | 0 | 0 | 0 | 0 | 2 |
| <u>SMARCC2</u>     | 1 | 0 | 0 | 1 | 0 | 0 | 0 | 0 | 0 | 0 | 2 |
| <u>SMARCC2</u>     | 1 | 0 | 0 | 1 | 0 | 0 | 0 | 0 | 0 | 0 | 2 |
| <u>SP3</u>         | 1 | 0 | 0 | 1 | 0 | 0 | 0 | 0 | 0 | 0 | 2 |
| <u>SRI</u>         | 0 | 0 | 0 | 1 | 0 | 0 | 0 | 0 | 0 | 1 | 2 |
| <u>ZFP36L2</u>     | 0 | 1 | 0 | 1 | 0 | 0 | 0 | 0 | 0 | 0 | 2 |
| <u>STYX</u>        | 1 | 0 | 0 | 1 | 0 | 0 | 0 | 0 | 0 | 0 | 2 |

|                  |   |   |   |   |   |   |   |   |   |   |   |
|------------------|---|---|---|---|---|---|---|---|---|---|---|
| <u>TAF9</u>      | 0 | 1 | 0 | 1 | 0 | 0 | 0 | 0 | 0 | 0 | 2 |
| <u>TBXA2R</u>    | 1 | 0 | 0 | 1 | 0 | 0 | 0 | 0 | 0 | 0 | 2 |
| <u>TCF4</u>      | 0 | 0 | 0 | 1 | 0 | 0 | 0 | 0 | 0 | 1 | 2 |
| <u>BTG1</u>      | 0 | 1 | 0 | 1 | 0 | 0 | 0 | 0 | 0 | 0 | 2 |
| <u>TGFA</u>      | 0 | 0 | 0 | 1 | 0 | 0 | 0 | 0 | 0 | 1 | 2 |
| <u>TIA1</u>      | 0 | 1 | 0 | 1 | 0 | 0 | 0 | 0 | 0 | 0 | 2 |
| <u>TPD52L2</u>   | 1 | 0 | 0 | 1 | 0 | 0 | 0 | 0 | 0 | 0 | 2 |
| <u>TPD52L2</u>   | 1 | 0 | 0 | 1 | 0 | 0 | 0 | 0 | 0 | 0 | 2 |
| <u>TPD52L2</u>   | 1 | 0 | 0 | 1 | 0 | 0 | 0 | 0 | 0 | 0 | 2 |
| <u>TPD52L2</u>   | 1 | 0 | 0 | 1 | 0 | 0 | 0 | 0 | 0 | 0 | 2 |
| <u>TPD52L2</u>   | 1 | 0 | 0 | 1 | 0 | 0 | 0 | 0 | 0 | 0 | 2 |
| <u>TPM3</u>      | 0 | 1 | 0 | 1 | 0 | 0 | 0 | 0 | 0 | 0 | 2 |
| <u>TSHR</u>      | 0 | 1 | 0 | 1 | 0 | 0 | 0 | 0 | 0 | 0 | 2 |
| <u>TXNRD1</u>    | 1 | 0 | 0 | 1 | 0 | 0 | 0 | 0 | 0 | 0 | 2 |
| <u>TXNRD1</u>    | 1 | 0 | 0 | 1 | 0 | 0 | 0 | 0 | 0 | 0 | 2 |
| <u>UBE3A</u>     | 1 | 0 | 0 | 1 | 0 | 0 | 0 | 0 | 0 | 0 | 2 |
| <u>UBE3A</u>     | 1 | 0 | 0 | 1 | 0 | 0 | 0 | 0 | 0 | 0 | 2 |
| <u>UTY</u>       | 1 | 0 | 0 | 1 | 0 | 0 | 0 | 0 | 0 | 0 | 2 |
| <u>VEGFA</u>     | 1 | 0 | 0 | 1 | 0 | 0 | 0 | 0 | 0 | 0 | 2 |
| <u>VEGFA</u>     | 1 | 0 | 0 | 1 | 0 | 0 | 0 | 0 | 0 | 0 | 2 |
| <u>VEGFA</u>     | 1 | 0 | 0 | 1 | 0 | 0 | 0 | 0 | 0 | 0 | 2 |
| <u>VEGFA</u>     | 1 | 0 | 0 | 1 | 0 | 0 | 0 | 0 | 0 | 0 | 2 |
| <u>TRPV1</u>     | 1 | 0 | 0 | 1 | 0 | 0 | 0 | 0 | 0 | 0 | 2 |
| <u>TRPV1</u>     | 1 | 0 | 0 | 1 | 0 | 0 | 0 | 0 | 0 | 0 | 2 |
| <u>ZNF133</u>    | 1 | 0 | 0 | 1 | 0 | 0 | 0 | 0 | 0 | 0 | 2 |
| <u>C1orf116</u>  | 0 | 0 | 0 | 1 | 0 | 0 | 0 | 0 | 0 | 1 | 2 |
| <u>CHCHD7</u>    | 0 | 1 | 0 | 1 | 0 | 0 | 0 | 0 | 0 | 0 | 2 |
| <u>CHCHD7</u>    | 0 | 1 | 0 | 1 | 0 | 0 | 0 | 0 | 0 | 0 | 2 |
| <u>CALCA</u>     | 0 | 0 | 0 | 1 | 0 | 0 | 0 | 0 | 0 | 1 | 2 |
| <u>HMBOX1</u>    | 1 | 0 | 0 | 1 | 0 | 0 | 0 | 0 | 0 | 0 | 2 |
| <u>RPAP3</u>     | 0 | 1 | 0 | 1 | 0 | 0 | 0 | 0 | 0 | 0 | 2 |
| <u>SAP30L</u>    | 0 | 1 | 0 | 1 | 0 | 0 | 0 | 0 | 0 | 0 | 2 |
| <u>C14orf169</u> | 0 | 1 | 0 | 1 | 0 | 0 | 0 | 0 | 0 | 0 | 2 |
| <u>C10orf68</u>  | 0 | 1 | 0 | 1 | 0 | 0 | 0 | 0 | 0 | 0 | 2 |
| <u>ZNF419</u>    | 0 | 0 | 0 | 1 | 0 | 0 | 0 | 0 | 0 | 1 | 2 |
| <u>ACBD4</u>     | 1 | 0 | 0 | 1 | 0 | 0 | 0 | 0 | 0 | 0 | 2 |
| <u>CLMN</u>      | 0 | 1 | 0 | 1 | 0 | 0 | 0 | 0 | 0 | 0 | 2 |
| <u>ALG9</u>      | 0 | 0 | 0 | 1 | 0 | 0 | 0 | 0 | 0 | 1 | 2 |
| <u>JMJD5</u>     | 1 | 0 | 0 | 1 | 0 | 0 | 0 | 0 | 0 | 0 | 2 |
| <u>CBLL1</u>     | 0 | 1 | 0 | 1 | 0 | 0 | 0 | 0 | 0 | 0 | 2 |
| <u>SYNPO2L</u>   | 1 | 0 | 0 | 1 | 0 | 0 | 0 | 0 | 0 | 0 | 2 |

|                  |   |   |   |   |   |   |   |   |   |   |   |
|------------------|---|---|---|---|---|---|---|---|---|---|---|
| <u>MYST3</u>     | 1 | 0 | 0 | 1 | 0 | 0 | 0 | 0 | 0 | 0 | 2 |
| <u>MYST3</u>     | 1 | 0 | 0 | 1 | 0 | 0 | 0 | 0 | 0 | 0 | 2 |
| <u>ZNF767</u>    | 0 | 0 | 0 | 1 | 0 | 0 | 0 | 0 | 0 | 1 | 2 |
| <u>DNAJB14</u>   | 0 | 0 | 0 | 1 | 0 | 0 | 0 | 0 | 0 | 1 | 2 |
| <u>OBFC1</u>     | 0 | 1 | 0 | 1 | 0 | 0 | 0 | 0 | 0 | 0 | 2 |
| <u>ANKRD53</u>   | 1 | 0 | 0 | 1 | 0 | 0 | 0 | 0 | 0 | 0 | 2 |
| <u>TRPM3</u>     | 0 | 0 | 0 | 1 | 0 | 0 | 0 | 0 | 0 | 1 | 2 |
| <u>IFT74</u>     | 1 | 0 | 0 | 1 | 0 | 0 | 0 | 0 | 0 | 0 | 2 |
| <u>TM2D3</u>     | 1 | 0 | 0 | 1 | 0 | 0 | 0 | 0 | 0 | 0 | 2 |
| <u>RAB11FIP1</u> | 1 | 0 | 0 | 1 | 0 | 0 | 0 | 0 | 0 | 0 | 2 |
| <u>WDR26</u>     | 0 | 0 | 0 | 1 | 0 | 0 | 0 | 0 | 0 | 1 | 2 |
| <u>ADAM12</u>    | 1 | 0 | 0 | 1 | 0 | 0 | 0 | 0 | 0 | 0 | 2 |
| <u>CSRP3</u>     | 0 | 0 | 0 | 1 | 0 | 0 | 0 | 0 | 0 | 1 | 2 |
| <u>SSPN</u>      | 0 | 1 | 0 | 1 | 0 | 0 | 0 | 0 | 0 | 0 | 2 |
| <u>TAF15</u>     | 0 | 0 | 0 | 1 | 0 | 0 | 0 | 0 | 0 | 1 | 2 |
| <u>PLA2G12A</u>  | 0 | 1 | 0 | 1 | 0 | 0 | 0 | 0 | 0 | 0 | 2 |
| <u>TSPAN14</u>   | 1 | 0 | 0 | 1 | 0 | 0 | 0 | 0 | 0 | 0 | 2 |
| <u>COLO</u>      | 1 | 0 | 0 | 1 | 0 | 0 | 0 | 0 | 0 | 0 | 2 |
| <u>COLO</u>      | 1 | 0 | 0 | 1 | 0 | 0 | 0 | 0 | 0 | 0 | 2 |
| <u>CASP1</u>     | 0 | 0 | 0 | 1 | 0 | 0 | 0 | 0 | 0 | 1 | 2 |
| <u>CASP1</u>     | 0 | 0 | 0 | 1 | 0 | 0 | 0 | 0 | 0 | 1 | 2 |
| <u>CASP1</u>     | 0 | 0 | 0 | 1 | 0 | 0 | 0 | 0 | 0 | 1 | 2 |
| <u>LRRC48</u>    | 0 | 0 | 0 | 1 | 0 | 0 | 0 | 0 | 0 | 1 | 2 |
| <u>APH1B</u>     | 0 | 1 | 0 | 1 | 0 | 0 | 0 | 0 | 0 | 0 | 2 |
| <u>DDX59</u>     | 0 | 0 | 0 | 1 | 0 | 0 | 0 | 0 | 0 | 1 | 2 |
| <u>CHST9</u>     | 0 | 1 | 0 | 1 | 0 | 0 | 0 | 0 | 0 | 0 | 2 |
| <u>CD99L2</u>    | 1 | 0 | 0 | 1 | 0 | 0 | 0 | 0 | 0 | 0 | 2 |
| <u>ATG10</u>     | 0 | 0 | 0 | 1 | 0 | 0 | 0 | 0 | 0 | 1 | 2 |
| <u>MRO</u>       | 0 | 1 | 0 | 1 | 0 | 0 | 0 | 0 | 0 | 0 | 2 |
| <u>FCAMR</u>     | 0 | 1 | 0 | 1 | 0 | 0 | 0 | 0 | 0 | 0 | 2 |
| <u>FCAMR</u>     | 1 | 0 | 0 | 1 | 0 | 0 | 0 | 0 | 0 | 0 | 2 |
| <u>NCALD</u>     | 0 | 0 | 0 | 1 | 0 | 0 | 0 | 0 | 0 | 1 | 2 |
| <u>NCALD</u>     | 0 | 0 | 0 | 1 | 0 | 0 | 0 | 0 | 0 | 1 | 2 |
| <u>NCALD</u>     | 0 | 0 | 0 | 1 | 0 | 0 | 0 | 0 | 0 | 1 | 2 |
| <u>NCALD</u>     | 0 | 0 | 0 | 1 | 0 | 0 | 0 | 0 | 0 | 1 | 2 |
| <u>REG4</u>      | 0 | 1 | 0 | 1 | 0 | 0 | 0 | 0 | 0 | 0 | 2 |
| <u>CASP8</u>     | 1 | 0 | 0 | 1 | 0 | 0 | 0 | 0 | 0 | 0 | 2 |
| <u>CASP8</u>     | 1 | 0 | 0 | 1 | 0 | 0 | 0 | 0 | 0 | 0 | 2 |
| <u>CASP8</u>     | 1 | 0 | 0 | 1 | 0 | 0 | 0 | 0 | 0 | 0 | 2 |
| <u>CASP8</u>     | 1 | 0 | 0 | 1 | 0 | 0 | 0 | 0 | 0 | 0 | 2 |
| <u>ARL6</u>      | 1 | 0 | 0 | 1 | 0 | 0 | 0 | 0 | 0 | 0 | 2 |

|                 |   |   |   |   |   |   |   |   |   |   |   |
|-----------------|---|---|---|---|---|---|---|---|---|---|---|
| <u>ANTXR1</u>   | 0 | 1 | 0 | 1 | 0 | 0 | 0 | 0 | 0 | 0 | 2 |
| <u>MGC13057</u> | 0 | 0 | 0 | 1 | 0 | 0 | 0 | 0 | 0 | 1 | 2 |
| <u>C8orf53</u>  | 0 | 1 | 0 | 1 | 0 | 0 | 0 | 0 | 0 | 0 | 2 |
| <u>DYRK2</u>    | 0 | 0 | 0 | 1 | 0 | 0 | 0 | 0 | 0 | 1 | 2 |
| <u>L3MBTL3</u>  | 1 | 0 | 0 | 1 | 0 | 0 | 0 | 0 | 0 | 0 | 2 |
| <u>ZMAT1</u>    | 1 | 0 | 0 | 1 | 0 | 0 | 0 | 0 | 0 | 0 | 2 |
| <u>CUL4B</u>    | 1 | 0 | 0 | 1 | 0 | 0 | 0 | 0 | 0 | 0 | 2 |
| <u>ST6GAL2</u>  | 0 | 1 | 0 | 1 | 0 | 0 | 0 | 0 | 0 | 0 | 2 |
| <u>GTPBP3</u>   | 0 | 0 | 0 | 1 | 0 | 0 | 0 | 0 | 0 | 1 | 2 |
| <u>PSRC1</u>    | 0 | 0 | 0 | 1 | 0 | 0 | 0 | 0 | 0 | 1 | 2 |
| <u>PTPN5</u>    | 1 | 0 | 0 | 1 | 0 | 0 | 0 | 0 | 0 | 0 | 2 |
| <u>PTPN5</u>    | 1 | 0 | 0 | 1 | 0 | 0 | 0 | 0 | 0 | 0 | 2 |
| <u>PEX3</u>     | 0 | 1 | 0 | 1 | 0 | 0 | 0 | 0 | 0 | 0 | 2 |
| <u>DGKE</u>     | 0 | 1 | 0 | 1 | 0 | 0 | 0 | 0 | 0 | 0 | 2 |
| <u>SHANK3</u>   | 0 | 1 | 0 | 1 | 0 | 0 | 0 | 0 | 0 | 0 | 2 |
| <u>AGPS</u>     | 0 | 1 | 0 | 1 | 0 | 0 | 0 | 0 | 0 | 0 | 2 |
| <u>CASK</u>     | 1 | 0 | 0 | 1 | 0 | 0 | 0 | 0 | 0 | 0 | 2 |
| <u>CASK</u>     | 1 | 0 | 0 | 1 | 0 | 0 | 0 | 0 | 0 | 0 | 2 |
| <u>SCARF1</u>   | 0 | 1 | 0 | 1 | 0 | 0 | 0 | 0 | 0 | 0 | 2 |
| <u>STX16</u>    | 1 | 0 | 0 | 1 | 0 | 0 | 0 | 0 | 0 | 0 | 2 |
| <u>B3GALT2</u>  | 0 | 1 | 0 | 1 | 0 | 0 | 0 | 0 | 0 | 0 | 2 |
| <u>INPP4B</u>   | 0 | 0 | 0 | 1 | 0 | 0 | 0 | 0 | 0 | 1 | 2 |
| <u>CCBL1</u>    | 1 | 0 | 0 | 1 | 0 | 0 | 0 | 0 | 0 | 0 | 2 |
| <u>CCBL1</u>    | 1 | 0 | 0 | 1 | 0 | 0 | 0 | 0 | 0 | 0 | 2 |
| <u>ARHGEF7</u>  | 0 | 0 | 0 | 1 | 0 | 0 | 0 | 0 | 0 | 1 | 2 |
| <u>MTMR3</u>    | 0 | 0 | 0 | 1 | 0 | 0 | 0 | 0 | 0 | 1 | 2 |
| <u>MTMR3</u>    | 0 | 0 | 0 | 1 | 0 | 0 | 0 | 0 | 0 | 1 | 2 |
| <u>TRIM4</u>    | 1 | 0 | 0 | 1 | 0 | 0 | 0 | 0 | 0 | 0 | 2 |
| <u>USP13</u>    | 0 | 1 | 0 | 1 | 0 | 0 | 0 | 0 | 0 | 0 | 2 |
| <u>CCNG2</u>    | 0 | 1 | 0 | 1 | 0 | 0 | 0 | 0 | 0 | 0 | 2 |
| <u>TAF1A</u>    | 0 | 0 | 0 | 1 | 0 | 0 | 0 | 0 | 0 | 1 | 2 |
| <u>TMEM41A</u>  | 0 | 1 | 0 | 1 | 0 | 0 | 0 | 0 | 0 | 0 | 2 |
| <u>SLC7A6</u>   | 0 | 0 | 0 | 1 | 0 | 0 | 0 | 0 | 0 | 1 | 2 |
| <u>STARD13</u>  | 1 | 0 | 0 | 1 | 0 | 0 | 0 | 0 | 0 | 0 | 2 |
| <u>STARD13</u>  | 1 | 0 | 0 | 1 | 0 | 0 | 0 | 0 | 0 | 0 | 2 |
| <u>TBX18</u>    | 0 | 1 | 0 | 1 | 0 | 0 | 0 | 0 | 0 | 0 | 2 |
| <u>ZNF502</u>   | 1 | 0 | 0 | 1 | 0 | 0 | 0 | 0 | 0 | 0 | 2 |
| <u>ZNF502</u>   | 1 | 0 | 0 | 1 | 0 | 0 | 0 | 0 | 0 | 0 | 2 |
| <u>ZNF502</u>   | 1 | 0 | 0 | 1 | 0 | 0 | 0 | 0 | 0 | 0 | 2 |
| <u>SESTD1</u>   | 0 | 1 | 0 | 1 | 0 | 0 | 0 | 0 | 0 | 0 | 2 |
| <u>SLFN11</u>   | 0 | 0 | 0 | 1 | 0 | 0 | 0 | 0 | 0 | 1 | 2 |





































































|                 |   |   |   |   |   |   |   |   |   |   |   |
|-----------------|---|---|---|---|---|---|---|---|---|---|---|
| <u>TMEM32</u>   | 0 | 1 | 0 | 0 | 0 | 0 | 0 | 0 | 0 | 1 | 2 |
| <u>ZNF670</u>   | 0 | 1 | 0 | 0 | 0 | 0 | 0 | 0 | 0 | 1 | 2 |
| <u>HSPC105</u>  | 0 | 1 | 0 | 0 | 0 | 0 | 0 | 0 | 0 | 1 | 2 |
| <u>UBE4A</u>    | 0 | 1 | 0 | 0 | 0 | 0 | 0 | 0 | 0 | 1 | 2 |
| <u>CD28</u>     | 0 | 1 | 0 | 0 | 0 | 0 | 0 | 0 | 0 | 1 | 2 |
| <u>SEP15</u>    | 0 | 1 | 0 | 0 | 0 | 0 | 0 | 0 | 0 | 1 | 2 |
| <u>SEP15</u>    | 0 | 1 | 0 | 0 | 0 | 0 | 0 | 0 | 0 | 1 | 2 |
| <u>MAP4K4</u>   | 0 | 1 | 0 | 0 | 0 | 0 | 0 | 0 | 0 | 1 | 2 |
| <u>LY86</u>     | 0 | 1 | 0 | 0 | 0 | 0 | 0 | 0 | 0 | 1 | 2 |
| <u>FHL5</u>     | 0 | 1 | 0 | 0 | 0 | 0 | 0 | 0 | 0 | 1 | 2 |
| <u>PSMF1</u>    | 0 | 1 | 0 | 0 | 0 | 0 | 0 | 0 | 0 | 1 | 2 |
| <u>SCARB2</u>   | 0 | 1 | 0 | 0 | 0 | 0 | 0 | 0 | 0 | 1 | 2 |
| <u>STXBP5L</u>  | 0 | 1 | 0 | 0 | 0 | 0 | 0 | 0 | 0 | 1 | 2 |
| <u>CD47</u>     | 0 | 1 | 0 | 0 | 0 | 0 | 0 | 0 | 0 | 1 | 2 |
| <u>CD47</u>     | 0 | 1 | 0 | 0 | 0 | 0 | 0 | 0 | 0 | 1 | 2 |
| <u>RGS6</u>     | 0 | 1 | 0 | 0 | 0 | 0 | 0 | 0 | 0 | 1 | 2 |
| <u>FEZ1</u>     | 0 | 1 | 0 | 0 | 0 | 0 | 0 | 0 | 0 | 1 | 2 |
| <u>N4BP1</u>    | 0 | 1 | 0 | 0 | 0 | 0 | 0 | 0 | 0 | 1 | 2 |
| <u>CLINT1</u>   | 0 | 1 | 0 | 0 | 0 | 0 | 0 | 0 | 0 | 1 | 2 |
| <u>VGLL4</u>    | 0 | 1 | 0 | 0 | 0 | 0 | 0 | 0 | 0 | 1 | 2 |
| <u>RAPGEF2</u>  | 0 | 1 | 0 | 0 | 0 | 0 | 0 | 0 | 0 | 1 | 2 |
| <u>FAM131B</u>  | 0 | 1 | 0 | 0 | 0 | 0 | 0 | 0 | 0 | 1 | 2 |
| <u>HDAC9</u>    | 0 | 1 | 0 | 0 | 0 | 0 | 0 | 0 | 0 | 1 | 2 |
| <u>ZNF536</u>   | 0 | 1 | 0 | 0 | 0 | 0 | 0 | 0 | 0 | 1 | 2 |
| <u>HDAC4</u>    | 0 | 1 | 0 | 0 | 0 | 0 | 0 | 0 | 0 | 1 | 2 |
| <u>KIAA0101</u> | 0 | 1 | 0 | 0 | 0 | 0 | 0 | 0 | 0 | 1 | 2 |
| <u>KIAA0101</u> | 0 | 1 | 0 | 0 | 0 | 0 | 0 | 0 | 0 | 1 | 2 |
| <u>TM9SF4</u>   | 0 | 1 | 0 | 0 | 0 | 0 | 0 | 0 | 0 | 1 | 2 |
| <u>RIMS3</u>    | 0 | 1 | 0 | 0 | 0 | 0 | 0 | 0 | 0 | 1 | 2 |
| <u>MTSS1</u>    | 0 | 1 | 0 | 0 | 0 | 0 | 0 | 0 | 0 | 1 | 2 |
| <u>TOMM20</u>   | 0 | 1 | 0 | 0 | 0 | 0 | 0 | 0 | 0 | 1 | 2 |
| <u>KIAA0753</u> | 0 | 1 | 0 | 0 | 0 | 0 | 0 | 0 | 0 | 1 | 2 |
| <u>KIAA0644</u> | 0 | 1 | 0 | 0 | 0 | 0 | 0 | 0 | 0 | 1 | 2 |
| <u>FAM20B</u>   | 0 | 1 | 0 | 0 | 0 | 0 | 0 | 0 | 0 | 1 | 2 |
| <u>MAFB</u>     | 0 | 1 | 0 | 0 | 0 | 0 | 0 | 0 | 0 | 1 | 2 |
| <u>AMMECR1</u>  | 0 | 1 | 0 | 0 | 0 | 0 | 0 | 0 | 0 | 1 | 2 |
| <u>USP15</u>    | 0 | 1 | 0 | 0 | 0 | 0 | 0 | 0 | 0 | 1 | 2 |
| <u>CDC27</u>    | 0 | 1 | 0 | 0 | 0 | 0 | 0 | 0 | 0 | 1 | 2 |
| <u>MED13</u>    | 0 | 1 | 0 | 0 | 0 | 0 | 0 | 0 | 0 | 1 | 2 |
| <u>PAK4</u>     | 0 | 0 | 0 | 0 | 1 | 0 | 0 | 0 | 0 | 1 | 2 |
| <u>MYBPC1</u>   | 0 | 0 | 0 | 0 | 1 | 1 | 0 | 0 | 0 | 0 | 2 |

|                 |   |   |   |   |   |   |   |   |   |   |   |
|-----------------|---|---|---|---|---|---|---|---|---|---|---|
| <u>WDR20</u>    | 0 | 0 | 0 | 0 | 1 | 1 | 0 | 0 | 0 | 0 | 2 |
| <u>HCN4</u>     | 0 | 1 | 0 | 1 | 0 | 0 | 0 | 0 | 0 | 0 | 2 |
| <u>HMG2L1</u>   | 0 | 0 | 0 | 1 | 0 | 0 | 0 | 0 | 0 | 1 | 2 |
| <u>SH2D3C</u>   | 1 | 0 | 0 | 1 | 0 | 0 | 0 | 0 | 0 | 0 | 2 |
| <u>GPC6</u>     | 0 | 1 | 0 | 1 | 0 | 0 | 0 | 0 | 0 | 0 | 2 |
| <u>SGK2</u>     | 1 | 0 | 0 | 1 | 0 | 0 | 0 | 0 | 0 | 0 | 2 |
| <u>AKAP9</u>    | 1 | 0 | 0 | 1 | 0 | 0 | 0 | 0 | 0 | 0 | 2 |
| <u>CDH17</u>    | 0 | 1 | 0 | 1 | 0 | 0 | 0 | 0 | 0 | 0 | 2 |
| <u>ATP6AP2</u>  | 0 | 0 | 0 | 1 | 0 | 0 | 1 | 0 | 0 | 0 | 2 |
| <u>PAK4</u>     | 0 | 0 | 0 | 1 | 0 | 0 | 0 | 0 | 0 | 1 | 2 |
| <u>B3GALT5</u>  | 0 | 0 | 0 | 1 | 0 | 0 | 0 | 0 | 0 | 1 | 2 |
| <u>MRV11</u>    | 0 | 1 | 0 | 1 | 0 | 0 | 0 | 0 | 0 | 0 | 2 |
| <u>MRV11</u>    | 0 | 0 | 0 | 1 | 0 | 0 | 1 | 0 | 0 | 0 | 2 |
| <u>ADARB1</u>   | 0 | 0 | 0 | 1 | 0 | 0 | 0 | 0 | 0 | 1 | 2 |
| <u>CDS1</u>     | 0 | 1 | 0 | 1 | 0 | 0 | 0 | 0 | 0 | 0 | 2 |
| <u>SEC24B</u>   | 1 | 0 | 0 | 1 | 0 | 0 | 0 | 0 | 0 | 0 | 2 |
| <u>RBM14</u>    | 0 | 1 | 0 | 1 | 0 | 0 | 0 | 0 | 0 | 0 | 2 |
| <u>VAV3</u>     | 1 | 0 | 0 | 1 | 0 | 0 | 0 | 0 | 0 | 0 | 2 |
| <u>TACC2</u>    | 0 | 1 | 0 | 1 | 0 | 0 | 0 | 0 | 0 | 0 | 2 |
| <u>RAD51AP1</u> | 1 | 0 | 0 | 1 | 0 | 0 | 0 | 0 | 0 | 0 | 2 |
| <u>ZNF271</u>   | 0 | 0 | 0 | 1 | 0 | 0 | 0 | 0 | 0 | 1 | 2 |
| <u>ZNF271</u>   | 0 | 0 | 0 | 1 | 0 | 0 | 0 | 0 | 0 | 1 | 2 |
| <u>C11orf58</u> | 0 | 1 | 0 | 1 | 0 | 0 | 0 | 0 | 0 | 0 | 2 |
| <u>AP3M2</u>    | 0 | 0 | 0 | 1 | 0 | 0 | 0 | 0 | 0 | 1 | 2 |
| <u>IL24</u>     | 0 | 0 | 0 | 1 | 0 | 0 | 1 | 0 | 0 | 0 | 2 |
| <u>LILRB3</u>   | 0 | 0 | 0 | 1 | 0 | 0 | 0 | 0 | 0 | 1 | 2 |
| <u>MID2</u>     | 0 | 1 | 0 | 1 | 0 | 0 | 0 | 0 | 0 | 0 | 2 |
| <u>WWP1</u>     | 0 | 0 | 0 | 1 | 0 | 0 | 0 | 0 | 0 | 1 | 2 |
| <u>ZWINT</u>    | 1 | 0 | 0 | 1 | 0 | 0 | 0 | 0 | 0 | 0 | 2 |
| <u>RNF24</u>    | 0 | 0 | 0 | 1 | 0 | 0 | 0 | 0 | 0 | 1 | 2 |
| <u>RNF24</u>    | 0 | 0 | 0 | 1 | 0 | 0 | 0 | 0 | 0 | 1 | 2 |
| <u>CHN2</u>     | 1 | 0 | 0 | 1 | 0 | 0 | 0 | 0 | 0 | 0 | 2 |
| <u>KLF8</u>     | 0 | 1 | 0 | 1 | 0 | 0 | 0 | 0 | 0 | 0 | 2 |
| <u>MED8</u>     | 0 | 0 | 0 | 1 | 1 | 0 | 0 | 0 | 0 | 0 | 2 |
| <u>RNF13</u>    | 0 | 0 | 0 | 1 | 0 | 0 | 0 | 0 | 0 | 1 | 2 |
| <u>RNF13</u>    | 0 | 0 | 0 | 1 | 0 | 0 | 0 | 0 | 0 | 1 | 2 |
| <u>C1QTNF3</u>  | 1 | 0 | 0 | 1 | 0 | 0 | 0 | 0 | 0 | 0 | 2 |
| <u>CIDEA</u>    | 1 | 0 | 0 | 1 | 0 | 0 | 0 | 0 | 0 | 0 | 2 |
| <u>CENTD1</u>   | 0 | 0 | 0 | 1 | 0 | 0 | 0 | 0 | 0 | 1 | 2 |
| <u>GALNTL2</u>  | 0 | 1 | 0 | 1 | 0 | 0 | 0 | 0 | 0 | 0 | 2 |
| <u>C18orf19</u> | 0 | 0 | 0 | 1 | 0 | 0 | 1 | 0 | 0 | 0 | 2 |

|                  |   |   |   |   |   |   |   |   |   |   |   |
|------------------|---|---|---|---|---|---|---|---|---|---|---|
| <u>C18orf19</u>  | 0 | 1 | 0 | 1 | 0 | 0 | 0 | 0 | 0 | 0 | 2 |
| <u>C18orf37</u>  | 1 | 0 | 0 | 1 | 0 | 0 | 0 | 0 | 0 | 0 | 2 |
| <u>IRGQ</u>      | 0 | 1 | 0 | 1 | 0 | 0 | 0 | 0 | 0 | 0 | 2 |
| <u>C19orf28</u>  | 0 | 1 | 0 | 1 | 0 | 0 | 0 | 0 | 0 | 0 | 2 |
| <u>LIN54</u>     | 1 | 0 | 0 | 1 | 0 | 0 | 0 | 0 | 0 | 0 | 2 |
| <u>LIN54</u>     | 1 | 0 | 0 | 1 | 0 | 0 | 0 | 0 | 0 | 0 | 2 |
| <u>STXBP5</u>    | 0 | 0 | 0 | 1 | 0 | 0 | 0 | 0 | 1 | 0 | 2 |
| <u>STXBP5</u>    | 0 | 1 | 0 | 1 | 0 | 0 | 0 | 0 | 0 | 0 | 2 |
| <u>NCOA7</u>     | 0 | 0 | 0 | 1 | 0 | 0 | 0 | 0 | 0 | 1 | 2 |
| <u>COX15</u>     | 0 | 1 | 0 | 1 | 0 | 0 | 0 | 0 | 0 | 0 | 2 |
| <u>CPB2</u>      | 0 | 1 | 0 | 1 | 0 | 0 | 0 | 0 | 0 | 0 | 2 |
| <u>CPT1A</u>     | 0 | 1 | 0 | 1 | 0 | 0 | 0 | 0 | 0 | 0 | 2 |
| <u>VPS37A</u>    | 0 | 1 | 0 | 1 | 0 | 0 | 0 | 0 | 0 | 0 | 2 |
| <u>CREM</u>      | 1 | 0 | 0 | 1 | 0 | 0 | 0 | 0 | 0 | 0 | 2 |
| <u>CREM</u>      | 1 | 0 | 0 | 1 | 0 | 0 | 0 | 0 | 0 | 0 | 2 |
| <u>CREM</u>      | 1 | 0 | 0 | 1 | 0 | 0 | 0 | 0 | 0 | 0 | 2 |
| <u>CREM</u>      | 1 | 0 | 0 | 1 | 0 | 0 | 0 | 0 | 0 | 0 | 2 |
| <u>CREM</u>      | 1 | 0 | 0 | 1 | 0 | 0 | 0 | 0 | 0 | 0 | 2 |
| <u>CREM</u>      | 1 | 0 | 0 | 1 | 0 | 0 | 0 | 0 | 0 | 0 | 2 |
| <u>CREM</u>      | 1 | 0 | 0 | 1 | 0 | 0 | 0 | 0 | 0 | 0 | 2 |
| <u>HAPLN1</u>    | 0 | 1 | 0 | 1 | 0 | 0 | 0 | 0 | 0 | 0 | 2 |
| <u>ASB7</u>      | 0 | 1 | 0 | 1 | 0 | 0 | 0 | 0 | 0 | 0 | 2 |
| <u>MYO3B</u>     | 1 | 0 | 0 | 1 | 0 | 0 | 0 | 0 | 0 | 0 | 2 |
| <u>C20orf112</u> | 0 | 1 | 0 | 1 | 0 | 0 | 0 | 0 | 0 | 0 | 2 |
| <u>SIRPA</u>     | 1 | 0 | 0 | 1 | 0 | 0 | 0 | 0 | 0 | 0 | 2 |
| <u>DNHD1</u>     | 1 | 0 | 0 | 1 | 0 | 0 | 0 | 0 | 0 | 0 | 2 |
| <u>WDR66</u>     | 0 | 1 | 0 | 1 | 0 | 0 | 0 | 0 | 0 | 0 | 2 |
| <u>TOM1L2</u>    | 0 | 0 | 0 | 1 | 0 | 0 | 0 | 0 | 0 | 1 | 2 |
| <u>CTH</u>       | 1 | 0 | 0 | 1 | 0 | 0 | 0 | 0 | 0 | 0 | 2 |
| <u>CCDC17</u>    | 0 | 0 | 0 | 1 | 0 | 0 | 0 | 0 | 0 | 1 | 2 |
| <u>CTNND1</u>    | 0 | 0 | 0 | 1 | 0 | 0 | 0 | 0 | 0 | 1 | 2 |
| <u>CTNND1</u>    | 0 | 0 | 0 | 1 | 0 | 0 | 0 | 0 | 0 | 1 | 2 |
| <u>CTNND1</u>    | 0 | 0 | 0 | 1 | 0 | 0 | 0 | 0 | 0 | 1 | 2 |
| <u>CTNND1</u>    | 0 | 0 | 0 | 1 | 0 | 0 | 0 | 0 | 0 | 1 | 2 |
| <u>CTNND1</u>    | 0 | 0 | 0 | 1 | 0 | 0 | 0 | 0 | 0 | 1 | 2 |
| <u>ZNF385B</u>   | 1 | 0 | 0 | 1 | 0 | 0 | 0 | 0 | 0 | 0 | 2 |
| <u>ZNF385B</u>   | 1 | 0 | 0 | 1 | 0 | 0 | 0 | 0 | 0 | 0 | 2 |
| <u>FAM119A</u>   | 0 | 0 | 0 | 1 | 0 | 0 | 0 | 0 | 0 | 1 | 2 |
| <u>SGOL2</u>     | 0 | 1 | 0 | 1 | 0 | 0 | 0 | 0 | 0 | 0 | 2 |
| <u>CCDC50</u>    | 0 | 1 | 0 | 1 | 0 | 0 | 0 | 0 | 0 | 0 | 2 |
| <u>RUNDC3B</u>   | 0 | 1 | 0 | 1 | 0 | 0 | 0 | 0 | 0 | 0 | 2 |
| <u>RPESP</u>     | 0 | 1 | 0 | 1 | 0 | 0 | 0 | 0 | 0 | 0 | 2 |

|                 |   |   |   |   |   |   |   |   |   |   |   |
|-----------------|---|---|---|---|---|---|---|---|---|---|---|
| <u>CYP26A1</u>  | 0 | 0 | 0 | 1 | 0 | 0 | 0 | 0 | 0 | 1 | 2 |
| <u>DACH1</u>    | 1 | 0 | 0 | 1 | 0 | 0 | 0 | 0 | 0 | 0 | 2 |
| <u>DACH1</u>    | 1 | 0 | 0 | 1 | 0 | 0 | 0 | 0 | 0 | 0 | 2 |
| <u>CLEC12A</u>  | 0 | 0 | 0 | 1 | 0 | 0 | 0 | 0 | 0 | 1 | 2 |
| <u>DGKB</u>     | 0 | 1 | 0 | 1 | 0 | 0 | 0 | 0 | 0 | 0 | 2 |
| <u>DAXX</u>     | 1 | 0 | 0 | 1 | 0 | 0 | 0 | 0 | 0 | 0 | 2 |
| <u>DDX5</u>     | 0 | 1 | 0 | 1 | 0 | 0 | 0 | 0 | 0 | 0 | 2 |
| <u>AES</u>      | 0 | 0 | 0 | 1 | 0 | 0 | 0 | 0 | 0 | 1 | 2 |
| <u>PSORS1C1</u> | 0 | 1 | 0 | 1 | 0 | 0 | 0 | 0 | 0 | 0 | 2 |
| <u>DIO2</u>     | 0 | 0 | 0 | 1 | 0 | 0 | 0 | 0 | 0 | 1 | 2 |
| <u>ACAN</u>     | 0 | 0 | 0 | 1 | 0 | 0 | 0 | 0 | 0 | 1 | 2 |
| <u>TRDMT1</u>   | 0 | 0 | 0 | 1 | 0 | 0 | 0 | 0 | 0 | 1 | 2 |
| <u>TRDMT1</u>   | 0 | 0 | 0 | 1 | 0 | 0 | 0 | 0 | 0 | 1 | 2 |
| <u>AGTR1</u>    | 0 | 0 | 0 | 1 | 0 | 0 | 0 | 0 | 0 | 1 | 2 |
| <u>E2F5</u>     | 0 | 0 | 0 | 1 | 0 | 0 | 0 | 0 | 0 | 1 | 2 |
| <u>EDA</u>      | 1 | 0 | 0 | 1 | 0 | 0 | 0 | 0 | 0 | 0 | 2 |
| <u>EMP2</u>     | 0 | 1 | 0 | 1 | 0 | 0 | 0 | 0 | 0 | 0 | 2 |
| <u>ESRRG</u>    | 1 | 0 | 0 | 1 | 0 | 0 | 0 | 0 | 0 | 0 | 2 |
| <u>UNC5B</u>    | 0 | 1 | 0 | 1 | 0 | 0 | 0 | 0 | 0 | 0 | 2 |
| <u>DOK6</u>     | 0 | 1 | 0 | 1 | 0 | 0 | 0 | 0 | 0 | 0 | 2 |
| <u>OPN5</u>     | 0 | 0 | 0 | 1 | 0 | 0 | 0 | 0 | 0 | 1 | 2 |
| <u>FGF9</u>     | 0 | 1 | 0 | 1 | 0 | 0 | 0 | 0 | 0 | 0 | 2 |
| <u>RUFY3</u>    | 0 | 1 | 0 | 1 | 0 | 0 | 0 | 0 | 0 | 0 | 2 |
| <u>FBXL11</u>   | 0 | 0 | 0 | 1 | 0 | 0 | 1 | 0 | 0 | 0 | 2 |
| <u>LIMCH1</u>   | 0 | 0 | 0 | 1 | 0 | 0 | 0 | 0 | 0 | 1 | 2 |
| <u>LIMCH1</u>   | 0 | 0 | 0 | 1 | 0 | 0 | 0 | 0 | 0 | 1 | 2 |
| <u>LIMCH1</u>   | 0 | 0 | 0 | 1 | 0 | 0 | 0 | 0 | 0 | 1 | 2 |
| <u>LIMCH1</u>   | 0 | 0 | 0 | 1 | 0 | 0 | 0 | 0 | 0 | 1 | 2 |
| <u>WDFY3</u>    | 0 | 0 | 0 | 1 | 0 | 0 | 0 | 0 | 0 | 1 | 2 |
| <u>TMCC1</u>    | 0 | 0 | 0 | 1 | 0 | 0 | 0 | 0 | 0 | 1 | 2 |
| <u>XPO7</u>     | 0 | 0 | 0 | 1 | 0 | 0 | 0 | 0 | 0 | 1 | 2 |
| <u>XPO7</u>     | 0 | 0 | 0 | 1 | 0 | 0 | 0 | 0 | 0 | 1 | 2 |
| <u>ZBTB43</u>   | 0 | 0 | 0 | 1 | 0 | 0 | 1 | 0 | 0 | 0 | 2 |
| <u>GARNL4</u>   | 0 | 0 | 0 | 1 | 0 | 0 | 0 | 0 | 0 | 1 | 2 |
| <u>IQCE</u>     | 0 | 0 | 0 | 1 | 0 | 0 | 0 | 0 | 0 | 1 | 2 |
| <u>SF3B3</u>    | 0 | 1 | 0 | 1 | 0 | 0 | 0 | 0 | 0 | 0 | 2 |
| <u>ABCA5</u>    | 0 | 1 | 0 | 1 | 0 | 0 | 0 | 0 | 0 | 0 | 2 |
| <u>CBX5</u>     | 0 | 1 | 0 | 1 | 0 | 0 | 0 | 0 | 0 | 0 | 2 |
| <u>DDAH1</u>    | 0 | 0 | 0 | 1 | 0 | 0 | 0 | 0 | 0 | 1 | 2 |
| <u>PATZ1</u>    | 0 | 1 | 0 | 1 | 0 | 0 | 0 | 0 | 0 | 0 | 2 |
| <u>RUSC1</u>    | 0 | 0 | 0 | 1 | 0 | 0 | 0 | 0 | 0 | 1 | 2 |



|                 |   |   |   |   |   |   |   |   |   |   |   |
|-----------------|---|---|---|---|---|---|---|---|---|---|---|
| <u>RUSC1</u>    | 0 | 0 | 0 | 1 | 0 | 0 | 0 | 0 | 0 | 1 | 2 |
| <u>RUSC1</u>    | 0 | 0 | 0 | 1 | 0 | 0 | 0 | 0 | 0 | 1 | 2 |
| <u>GAB1</u>     | 0 | 1 | 0 | 1 | 0 | 0 | 0 | 0 | 0 | 0 | 2 |
| <u>MFSD8</u>    | 0 | 1 | 0 | 1 | 0 | 0 | 0 | 0 | 0 | 0 | 2 |
| <u>KLK5</u>     | 1 | 0 | 0 | 1 | 0 | 0 | 0 | 0 | 0 | 0 | 2 |
| <u>ARIH1</u>    | 0 | 1 | 0 | 1 | 0 | 0 | 0 | 0 | 0 | 0 | 2 |
| <u>PRDX5</u>    | 1 | 0 | 0 | 1 | 0 | 0 | 0 | 0 | 0 | 0 | 2 |
| <u>PRDX5</u>    | 1 | 0 | 0 | 1 | 0 | 0 | 0 | 0 | 0 | 0 | 2 |
| <u>RCHY1</u>    | 1 | 0 | 0 | 1 | 0 | 0 | 0 | 0 | 0 | 0 | 2 |
| <u>IFFO</u>     | 0 | 0 | 0 | 1 | 0 | 0 | 0 | 0 | 0 | 1 | 2 |
| <u>TMEM87A</u>  | 0 | 1 | 0 | 1 | 0 | 0 | 0 | 0 | 0 | 0 | 2 |
| <u>LOC26010</u> | 0 | 0 | 0 | 1 | 0 | 0 | 0 | 0 | 0 | 1 | 2 |
| <u>LOC26010</u> | 0 | 0 | 0 | 1 | 0 | 0 | 0 | 0 | 0 | 1 | 2 |
| <u>SETBP1</u>   | 0 | 1 | 0 | 1 | 0 | 0 | 0 | 0 | 0 | 0 | 2 |
| <u>GIGYF2</u>   | 0 | 0 | 0 | 1 | 0 | 0 | 0 | 0 | 0 | 1 | 2 |
| <u>GIGYF2</u>   | 0 | 0 | 0 | 1 | 0 | 0 | 0 | 0 | 0 | 1 | 2 |
| <u>HERC4</u>    | 1 | 0 | 0 | 1 | 0 | 0 | 0 | 0 | 0 | 0 | 2 |
| <u>GFPT1</u>    | 0 | 1 | 0 | 1 | 0 | 0 | 0 | 0 | 0 | 0 | 2 |
| <u>GFRA1</u>    | 0 | 0 | 0 | 1 | 0 | 0 | 0 | 0 | 0 | 1 | 2 |
| <u>EIF2AK1</u>  | 0 | 0 | 0 | 1 | 0 | 0 | 0 | 0 | 0 | 1 | 2 |
| <u>GNAO1</u>    | 0 | 1 | 0 | 1 | 0 | 0 | 0 | 0 | 0 | 0 | 2 |
| <u>GNAO1</u>    | 0 | 1 | 0 | 1 | 0 | 0 | 0 | 0 | 0 | 0 | 2 |
| <u>GNAT1</u>    | 0 | 1 | 0 | 1 | 0 | 0 | 0 | 0 | 0 | 0 | 2 |
| <u>GNAT1</u>    | 0 | 1 | 0 | 1 | 0 | 0 | 0 | 0 | 0 | 0 | 2 |
| <u>SLCO3A1</u>  | 0 | 1 | 0 | 1 | 0 | 0 | 0 | 0 | 0 | 0 | 2 |
| <u>C12orf64</u> | 0 | 0 | 0 | 1 | 0 | 0 | 1 | 0 | 0 | 0 | 2 |
| <u>GLT8D3</u>   | 0 | 0 | 0 | 1 | 0 | 0 | 0 | 0 | 0 | 1 | 2 |
| <u>LYPD5</u>    | 0 | 0 | 0 | 1 | 0 | 0 | 0 | 0 | 0 | 1 | 2 |
| <u>C9orf126</u> | 0 | 1 | 0 | 1 | 0 | 0 | 0 | 0 | 0 | 0 | 2 |
| <u>MRPL42</u>   | 1 | 0 | 0 | 1 | 0 | 0 | 0 | 0 | 0 | 0 | 2 |
| <u>MRPL42</u>   | 1 | 0 | 0 | 1 | 0 | 0 | 0 | 0 | 0 | 0 | 2 |
| <u>MCTS1</u>    | 0 | 1 | 0 | 1 | 0 | 0 | 0 | 0 | 0 | 0 | 2 |
| <u>HIPK2</u>    | 0 | 0 | 0 | 1 | 0 | 0 | 0 | 0 | 0 | 1 | 2 |
| <u>GRIN2A</u>   | 1 | 0 | 0 | 1 | 0 | 0 | 0 | 0 | 0 | 0 | 2 |
| <u>MRPL22</u>   | 0 | 1 | 0 | 1 | 0 | 0 | 0 | 0 | 0 | 0 | 2 |
| <u>TAGLN3</u>   | 1 | 0 | 0 | 1 | 0 | 0 | 0 | 0 | 0 | 0 | 2 |
| <u>RACGAP1</u>  | 1 | 0 | 0 | 1 | 0 | 0 | 0 | 0 | 0 | 0 | 2 |
| <u>GRM8</u>     | 0 | 1 | 0 | 1 | 0 | 0 | 0 | 0 | 0 | 0 | 2 |
| <u>GRHL1</u>    | 0 | 0 | 0 | 1 | 0 | 0 | 1 | 0 | 0 | 0 | 2 |
| <u>ALG6</u>     | 0 | 1 | 0 | 1 | 0 | 0 | 0 | 0 | 0 | 0 | 2 |
| <u>SH3KBP1</u>  | 1 | 0 | 0 | 1 | 0 | 0 | 0 | 0 | 0 | 0 | 2 |

|                  |   |   |   |   |   |   |   |   |   |   |   |
|------------------|---|---|---|---|---|---|---|---|---|---|---|
| <u>EMR2</u>      | 0 | 0 | 0 | 1 | 0 | 0 | 0 | 0 | 0 | 1 | 2 |
| <u>EMR2</u>      | 0 | 0 | 0 | 1 | 0 | 0 | 0 | 0 | 0 | 1 | 2 |
| <u>ANXA6</u>     | 0 | 0 | 0 | 1 | 0 | 0 | 0 | 0 | 0 | 1 | 2 |
| <u>UBE2K</u>     | 0 | 0 | 0 | 1 | 0 | 0 | 0 | 0 | 0 | 1 | 2 |
| <u>EIF4E3</u>    | 1 | 0 | 0 | 1 | 0 | 0 | 0 | 0 | 0 | 0 | 2 |
| <u>EIF4E3</u>    | 1 | 0 | 0 | 1 | 0 | 0 | 0 | 0 | 0 | 0 | 2 |
| <u>HNRNPC</u>    | 0 | 0 | 0 | 1 | 0 | 0 | 0 | 0 | 0 | 1 | 2 |
| <u>FAS</u>       | 0 | 0 | 0 | 1 | 0 | 0 | 0 | 0 | 0 | 1 | 2 |
| <u>FAS</u>       | 0 | 0 | 0 | 1 | 0 | 0 | 0 | 0 | 0 | 1 | 2 |
| <u>FAS</u>       | 0 | 0 | 0 | 1 | 0 | 0 | 0 | 0 | 0 | 1 | 2 |
| <u>FAS</u>       | 0 | 0 | 0 | 1 | 0 | 0 | 0 | 0 | 0 | 1 | 2 |
| <u>AQP4</u>      | 0 | 0 | 0 | 1 | 0 | 0 | 0 | 0 | 0 | 1 | 2 |
| <u>ING1</u>      | 1 | 0 | 0 | 1 | 0 | 0 | 0 | 0 | 0 | 0 | 2 |
| <u>ING1</u>      | 1 | 0 | 0 | 1 | 0 | 0 | 0 | 0 | 0 | 0 | 2 |
| <u>INPP4A</u>    | 0 | 1 | 0 | 1 | 0 | 0 | 0 | 0 | 0 | 0 | 2 |
| <u>IRF5</u>      | 0 | 0 | 0 | 1 | 0 | 0 | 0 | 0 | 0 | 1 | 2 |
| <u>IRF5</u>      | 0 | 0 | 0 | 1 | 0 | 0 | 0 | 0 | 0 | 1 | 2 |
| <u>ITGB1</u>     | 0 | 1 | 0 | 1 | 0 | 0 | 0 | 0 | 0 | 0 | 2 |
| <u>KCNG1</u>     | 0 | 0 | 0 | 1 | 0 | 0 | 1 | 0 | 0 | 0 | 2 |
| <u>KCNH1</u>     | 0 | 1 | 0 | 1 | 0 | 0 | 0 | 0 | 0 | 0 | 2 |
| <u>LOC388969</u> | 0 | 1 | 0 | 1 | 0 | 0 | 0 | 0 | 0 | 0 | 2 |
| <u>LAMA3</u>     | 1 | 0 | 0 | 1 | 0 | 0 | 0 | 0 | 0 | 0 | 2 |
| <u>LAMA3</u>     | 1 | 0 | 0 | 1 | 0 | 0 | 0 | 0 | 0 | 0 | 2 |
| <u>LAMP2</u>     | 0 | 1 | 0 | 1 | 0 | 0 | 0 | 0 | 0 | 0 | 2 |
| <u>ARHGAP6</u>   | 0 | 0 | 0 | 1 | 0 | 0 | 1 | 0 | 0 | 0 | 2 |
| <u>ARHGAP6</u>   | 1 | 0 | 0 | 1 | 0 | 0 | 0 | 0 | 0 | 0 | 2 |
| <u>C8orf59</u>   | 0 | 0 | 0 | 1 | 0 | 0 | 0 | 0 | 0 | 1 | 2 |
| <u>C8orf59</u>   | 0 | 0 | 0 | 1 | 0 | 0 | 0 | 0 | 0 | 1 | 2 |
| <u>LOX</u>       | 0 | 1 | 0 | 1 | 0 | 0 | 0 | 0 | 0 | 0 | 2 |
| <u>GTF2H5</u>    | 0 | 1 | 0 | 1 | 0 | 0 | 0 | 0 | 0 | 0 | 2 |
| <u>SMAD5</u>     | 0 | 0 | 0 | 1 | 0 | 0 | 1 | 0 | 0 | 0 | 2 |
| <u>SMAD5</u>     | 1 | 0 | 0 | 1 | 0 | 0 | 0 | 0 | 0 | 0 | 2 |
| <u>MAGEB1</u>    | 1 | 0 | 0 | 1 | 0 | 0 | 0 | 0 | 0 | 0 | 2 |
| <u>ARSD</u>      | 0 | 1 | 0 | 1 | 0 | 0 | 0 | 0 | 0 | 0 | 2 |
| <u>MCC</u>       | 0 | 0 | 0 | 1 | 0 | 0 | 0 | 0 | 0 | 1 | 2 |
| <u>CD46</u>      | 0 | 0 | 0 | 1 | 0 | 0 | 0 | 0 | 0 | 1 | 2 |
| <u>CD46</u>      | 0 | 0 | 0 | 1 | 0 | 0 | 0 | 0 | 0 | 1 | 2 |
| <u>CD46</u>      | 0 | 0 | 0 | 1 | 0 | 0 | 0 | 0 | 0 | 1 | 2 |
| <u>CD46</u>      | 0 | 0 | 0 | 1 | 0 | 0 | 0 | 0 | 0 | 1 | 2 |
| <u>MDM2</u>      | 0 | 1 | 0 | 1 | 0 | 0 | 0 | 0 | 0 | 0 | 2 |
| <u>MDM2</u>      | 0 | 1 | 0 | 1 | 0 | 0 | 0 | 0 | 0 | 0 | 2 |

|                 |   |   |   |   |   |   |   |   |   |   |   |
|-----------------|---|---|---|---|---|---|---|---|---|---|---|
| <u>MDM2</u>     | 0 | 1 | 0 | 1 | 0 | 0 | 0 | 0 | 0 | 0 | 2 |
| <u>MEF2A</u>    | 1 | 0 | 0 | 1 | 0 | 0 | 0 | 0 | 0 | 0 | 2 |
| <u>MEF2A</u>    | 1 | 0 | 0 | 1 | 0 | 0 | 0 | 0 | 0 | 0 | 2 |
| <u>MEF2A</u>    | 1 | 0 | 0 | 1 | 0 | 0 | 0 | 0 | 0 | 0 | 2 |
| <u>MME</u>      | 0 | 0 | 0 | 1 | 0 | 0 | 0 | 0 | 0 | 1 | 2 |
| <u>MME</u>      | 0 | 0 | 0 | 1 | 0 | 0 | 0 | 0 | 0 | 1 | 2 |
| <u>ASPH</u>     | 0 | 1 | 0 | 1 | 0 | 0 | 0 | 0 | 0 | 0 | 2 |
| <u>ASPH</u>     | 0 | 1 | 0 | 1 | 0 | 0 | 0 | 0 | 0 | 0 | 2 |
| <u>MYL1</u>     | 1 | 0 | 0 | 1 | 0 | 0 | 0 | 0 | 0 | 0 | 2 |
| <u>NAP1L1</u>   | 0 | 1 | 0 | 1 | 0 | 0 | 0 | 0 | 0 | 0 | 2 |
| <u>NBL1</u>     | 1 | 0 | 0 | 1 | 0 | 0 | 0 | 0 | 0 | 0 | 2 |
| <u>NUBP1</u>    | 0 | 1 | 0 | 1 | 0 | 0 | 0 | 0 | 0 | 0 | 2 |
| <u>ATM</u>      | 0 | 0 | 0 | 1 | 0 | 0 | 0 | 0 | 0 | 1 | 2 |
| <u>NF2</u>      | 0 | 1 | 0 | 1 | 0 | 0 | 0 | 0 | 0 | 0 | 2 |
| <u>NRCAM</u>    | 0 | 0 | 0 | 1 | 0 | 0 | 0 | 0 | 0 | 1 | 2 |
| <u>NTRK2</u>    | 0 | 0 | 0 | 1 | 0 | 0 | 0 | 0 | 0 | 1 | 2 |
| <u>OGN</u>      | 0 | 0 | 0 | 1 | 0 | 0 | 0 | 0 | 0 | 1 | 2 |
| <u>PAX6</u>     | 0 | 1 | 0 | 1 | 0 | 0 | 0 | 0 | 0 | 0 | 2 |
| <u>F11R</u>     | 0 | 0 | 0 | 1 | 0 | 0 | 0 | 0 | 0 | 1 | 2 |
| <u>PBX1</u>     | 0 | 1 | 0 | 1 | 0 | 0 | 0 | 0 | 0 | 0 | 2 |
| <u>PCBP2</u>    | 0 | 1 | 0 | 1 | 0 | 0 | 0 | 0 | 0 | 0 | 2 |
| <u>ABHD5</u>    | 0 | 1 | 0 | 1 | 0 | 0 | 0 | 0 | 0 | 0 | 2 |
| <u>METTL9</u>   | 1 | 0 | 0 | 1 | 0 | 0 | 0 | 0 | 0 | 0 | 2 |
| <u>SUV420H1</u> | 0 | 1 | 0 | 1 | 0 | 0 | 0 | 0 | 0 | 0 | 2 |
| <u>RNF12</u>    | 0 | 1 | 0 | 1 | 0 | 0 | 0 | 0 | 0 | 0 | 2 |
| <u>IRAK4</u>    | 0 | 0 | 0 | 1 | 0 | 0 | 0 | 0 | 0 | 1 | 2 |
| <u>TUBE1</u>    | 0 | 1 | 0 | 1 | 0 | 0 | 0 | 0 | 0 | 0 | 2 |
| <u>C5orf5</u>   | 1 | 0 | 0 | 1 | 0 | 0 | 0 | 0 | 0 | 0 | 2 |
| <u>C5orf5</u>   | 1 | 0 | 0 | 1 | 0 | 0 | 0 | 0 | 0 | 0 | 2 |
| <u>C4orf18</u>  | 1 | 0 | 0 | 1 | 0 | 0 | 0 | 0 | 0 | 0 | 2 |
| <u>DACT1</u>    | 1 | 0 | 0 | 1 | 0 | 0 | 0 | 0 | 0 | 0 | 2 |
| <u>MBTPS2</u>   | 0 | 1 | 0 | 1 | 0 | 0 | 0 | 0 | 0 | 0 | 2 |
| <u>NCKIPSD</u>  | 1 | 0 | 0 | 1 | 0 | 0 | 0 | 0 | 0 | 0 | 2 |
| <u>ARMCX3</u>   | 0 | 0 | 0 | 1 | 0 | 0 | 0 | 0 | 0 | 1 | 2 |
| <u>FKBP7</u>    | 0 | 1 | 0 | 1 | 0 | 0 | 0 | 0 | 0 | 0 | 2 |
| <u>CAB39</u>    | 1 | 0 | 0 | 1 | 0 | 0 | 0 | 0 | 0 | 0 | 2 |
| <u>CAB39</u>    | 1 | 0 | 0 | 1 | 0 | 0 | 0 | 0 | 0 | 0 | 2 |
| <u>PFKFB2</u>   | 0 | 0 | 0 | 1 | 0 | 0 | 0 | 0 | 0 | 1 | 2 |
| <u>SERPINA1</u> | 0 | 1 | 0 | 1 | 0 | 0 | 0 | 0 | 0 | 0 | 2 |
| <u>SERPINA1</u> | 0 | 0 | 1 | 1 | 0 | 0 | 0 | 0 | 0 | 0 | 2 |
| <u>PLP1</u>     | 1 | 0 | 0 | 1 | 0 | 0 | 0 | 0 | 0 | 0 | 2 |

|                    |   |   |   |   |   |   |   |   |   |   |   |
|--------------------|---|---|---|---|---|---|---|---|---|---|---|
| <u>FAM105A</u>     | 0 | 1 | 0 | 1 | 0 | 0 | 0 | 0 | 0 | 0 | 2 |
| <u>EGLN1</u>       | 0 | 1 | 0 | 1 | 0 | 0 | 0 | 0 | 0 | 0 | 2 |
| <u>FLJ20674</u>    | 0 | 1 | 0 | 1 | 0 | 0 | 0 | 0 | 0 | 0 | 2 |
| <u>A2BP1</u>       | 0 | 1 | 0 | 1 | 0 | 0 | 0 | 0 | 0 | 0 | 2 |
| <u>A2BP1</u>       | 0 | 1 | 0 | 1 | 0 | 0 | 0 | 0 | 0 | 0 | 2 |
| <u>ZNF586</u>      | 0 | 0 | 0 | 1 | 0 | 0 | 0 | 0 | 0 | 1 | 2 |
| <u>ZNF280D</u>     | 0 | 0 | 0 | 1 | 0 | 0 | 0 | 0 | 0 | 1 | 2 |
| <u>RP11-35N6.1</u> | 1 | 0 | 0 | 1 | 0 | 0 | 0 | 0 | 0 | 0 | 2 |
| <u>CTF8</u>        | 0 | 1 | 0 | 1 | 0 | 0 | 0 | 0 | 0 | 0 | 2 |
| <u>CTF8</u>        | 1 | 0 | 0 | 1 | 0 | 0 | 0 | 0 | 0 | 0 | 2 |
| <u>PID1</u>        | 1 | 0 | 0 | 1 | 0 | 0 | 0 | 0 | 0 | 0 | 2 |
| <u>AIM1L</u>       | 0 | 0 | 0 | 1 | 0 | 0 | 0 | 0 | 0 | 1 | 2 |
| <u>SLC25A36</u>    | 0 | 0 | 0 | 1 | 0 | 0 | 0 | 0 | 0 | 1 | 2 |
| <u>VPS13D</u>      | 1 | 0 | 0 | 1 | 0 | 0 | 0 | 0 | 0 | 0 | 2 |
| <u>BBS7</u>        | 0 | 1 | 0 | 1 | 0 | 0 | 0 | 0 | 0 | 0 | 2 |
| <u>LEPREL1</u>     | 0 | 1 | 0 | 1 | 0 | 0 | 0 | 0 | 0 | 0 | 2 |
| <u>PPP2R5C</u>     | 0 | 1 | 0 | 1 | 0 | 0 | 0 | 0 | 0 | 0 | 2 |
| <u>QRSL1</u>       | 0 | 1 | 0 | 1 | 0 | 0 | 0 | 0 | 0 | 0 | 2 |
| <u>FLJ11151</u>    | 0 | 0 | 0 | 1 | 0 | 0 | 0 | 0 | 0 | 1 | 2 |
| <u>PPP6C</u>       | 0 | 1 | 0 | 1 | 0 | 0 | 0 | 0 | 0 | 0 | 2 |
| <u>DDX43</u>       | 0 | 1 | 0 | 1 | 0 | 0 | 0 | 0 | 0 | 0 | 2 |
| <u>GALNT10</u>     | 0 | 0 | 0 | 1 | 0 | 0 | 0 | 0 | 0 | 1 | 2 |
| <u>ZNF83</u>       | 0 | 0 | 0 | 1 | 0 | 0 | 0 | 0 | 0 | 1 | 2 |
| <u>ZNF83</u>       | 0 | 0 | 0 | 1 | 0 | 0 | 0 | 0 | 0 | 1 | 2 |
| <u>ZNF83</u>       | 0 | 0 | 0 | 1 | 0 | 0 | 0 | 0 | 0 | 1 | 2 |
| <u>ZNF83</u>       | 0 | 0 | 0 | 1 | 0 | 0 | 0 | 0 | 0 | 1 | 2 |
| <u>RIOK2</u>       | 0 | 1 | 0 | 1 | 0 | 0 | 0 | 0 | 0 | 0 | 2 |
| <u>IQWD1</u>       | 1 | 0 | 0 | 1 | 0 | 0 | 0 | 0 | 0 | 0 | 2 |
| <u>MAPK9</u>       | 0 | 1 | 0 | 1 | 0 | 0 | 0 | 0 | 0 | 0 | 2 |
| <u>DNAJC3</u>      | 0 | 1 | 0 | 1 | 0 | 0 | 0 | 0 | 0 | 0 | 2 |
| <u>LRRC8A</u>      | 1 | 0 | 0 | 1 | 0 | 0 | 0 | 0 | 0 | 0 | 2 |
| <u>KCNQ5</u>       | 1 | 0 | 0 | 1 | 0 | 0 | 0 | 0 | 0 | 0 | 2 |
| <u>KLK7</u>        | 0 | 0 | 0 | 1 | 0 | 0 | 0 | 0 | 0 | 1 | 2 |
| <u>PSAP</u>        | 0 | 0 | 0 | 1 | 0 | 0 | 0 | 0 | 0 | 1 | 2 |
| <u>PSG11</u>       | 0 | 0 | 0 | 1 | 0 | 0 | 0 | 0 | 0 | 1 | 2 |
| <u>UGCGL1</u>      | 0 | 1 | 0 | 1 | 0 | 0 | 0 | 0 | 0 | 0 | 2 |
| <u>KIAA1191</u>    | 1 | 0 | 0 | 1 | 0 | 0 | 0 | 0 | 0 | 0 | 2 |
| <u>GPR126</u>      | 0 | 0 | 0 | 1 | 0 | 0 | 0 | 0 | 0 | 1 | 2 |
| <u>SMEK2</u>       | 1 | 0 | 0 | 1 | 0 | 0 | 0 | 0 | 0 | 0 | 2 |
| <u>PTCH1</u>       | 0 | 0 | 0 | 1 | 0 | 0 | 0 | 0 | 0 | 1 | 2 |
| <u>PTCH1</u>       | 0 | 0 | 0 | 1 | 0 | 0 | 0 | 0 | 0 | 1 | 2 |

|                |   |   |   |   |   |   |   |   |   |   |   |
|----------------|---|---|---|---|---|---|---|---|---|---|---|
| <u>PTCH1</u>   | 0 | 0 | 0 | 1 | 0 | 0 | 0 | 0 | 0 | 1 | 2 |
| <u>PTCH1</u>   | 0 | 0 | 0 | 1 | 0 | 0 | 0 | 0 | 0 | 1 | 2 |
| <u>PTCH1</u>   | 0 | 0 | 0 | 1 | 0 | 0 | 0 | 0 | 0 | 1 | 2 |
| <u>SENP7</u>   | 1 | 0 | 0 | 1 | 0 | 0 | 0 | 0 | 0 | 0 | 2 |
| <u>PTPRC</u>   | 0 | 0 | 0 | 1 | 0 | 0 | 0 | 0 | 0 | 1 | 2 |
| <u>PTPRD</u>   | 1 | 0 | 0 | 1 | 0 | 0 | 0 | 0 | 0 | 0 | 2 |
| <u>PTPRD</u>   | 1 | 0 | 0 | 1 | 0 | 0 | 0 | 0 | 0 | 0 | 2 |
| <u>PTPRD</u>   | 1 | 0 | 0 | 1 | 0 | 0 | 0 | 0 | 0 | 0 | 2 |
| <u>PTPRJ</u>   | 0 | 1 | 0 | 1 | 0 | 0 | 0 | 0 | 0 | 0 | 2 |
| <u>PVR</u>     | 0 | 1 | 0 | 1 | 0 | 0 | 0 | 0 | 0 | 0 | 2 |
| <u>PEX19</u>   | 0 | 0 | 0 | 1 | 0 | 0 | 0 | 0 | 0 | 1 | 2 |
| <u>RBMS1</u>   | 0 | 1 | 0 | 1 | 0 | 0 | 0 | 0 | 0 | 0 | 2 |
| <u>RNASE4</u>  | 1 | 0 | 0 | 1 | 0 | 0 | 0 | 0 | 0 | 0 | 2 |
| <u>BDH1</u>    | 1 | 0 | 0 | 1 | 0 | 0 | 0 | 0 | 0 | 0 | 2 |
| <u>RTN1</u>    | 1 | 0 | 0 | 1 | 0 | 0 | 0 | 0 | 0 | 0 | 2 |
| <u>RTN1</u>    | 1 | 0 | 0 | 1 | 0 | 0 | 0 | 0 | 0 | 0 | 2 |
| <u>SCP2</u>    | 0 | 1 | 0 | 1 | 0 | 0 | 0 | 0 | 0 | 0 | 2 |
| <u>NPAS3</u>   | 1 | 0 | 0 | 1 | 0 | 0 | 0 | 0 | 0 | 0 | 2 |
| <u>ERAP2</u>   | 0 | 1 | 0 | 1 | 0 | 0 | 0 | 0 | 0 | 0 | 2 |
| <u>ARL6IP2</u> | 1 | 0 | 0 | 1 | 0 | 0 | 0 | 0 | 0 | 0 | 2 |
| <u>MS4A6A</u>  | 0 | 0 | 0 | 1 | 0 | 0 | 0 | 0 | 0 | 1 | 2 |
| <u>RABL5</u>   | 0 | 0 | 0 | 1 | 0 | 0 | 0 | 0 | 0 | 1 | 2 |
| <u>SLC12A3</u> | 0 | 1 | 0 | 1 | 0 | 0 | 0 | 0 | 0 | 0 | 2 |
| <u>SLCO1A2</u> | 0 | 1 | 0 | 1 | 0 | 0 | 0 | 0 | 0 | 0 | 2 |
| <u>SLCO1A2</u> | 0 | 0 | 0 | 1 | 0 | 0 | 1 | 0 | 0 | 0 | 2 |
| <u>SMARCC2</u> | 1 | 0 | 0 | 1 | 0 | 0 | 0 | 0 | 0 | 0 | 2 |
| <u>SMARCC2</u> | 1 | 0 | 0 | 1 | 0 | 0 | 0 | 0 | 0 | 0 | 2 |
| <u>SRI</u>     | 0 | 0 | 0 | 1 | 0 | 0 | 0 | 0 | 0 | 1 | 2 |
| <u>TAF9</u>    | 0 | 1 | 0 | 1 | 0 | 0 | 0 | 0 | 0 | 0 | 2 |
| <u>TBXA2R</u>  | 1 | 0 | 0 | 1 | 0 | 0 | 0 | 0 | 0 | 0 | 2 |
| <u>TCF4</u>    | 0 | 0 | 0 | 1 | 0 | 0 | 0 | 0 | 0 | 1 | 2 |
| <u>BTG1</u>    | 0 | 1 | 0 | 1 | 0 | 0 | 0 | 0 | 0 | 0 | 2 |
| <u>TGFA</u>    | 0 | 0 | 0 | 1 | 0 | 0 | 0 | 0 | 0 | 1 | 2 |
| <u>TPD52L2</u> | 1 | 0 | 0 | 1 | 0 | 0 | 0 | 0 | 0 | 0 | 2 |
| <u>TPD52L2</u> | 1 | 0 | 0 | 1 | 0 | 0 | 0 | 0 | 0 | 0 | 2 |
| <u>TPD52L2</u> | 1 | 0 | 0 | 1 | 0 | 0 | 0 | 0 | 0 | 0 | 2 |
| <u>TPD52L2</u> | 1 | 0 | 0 | 1 | 0 | 0 | 0 | 0 | 0 | 0 | 2 |
| <u>TPD52L2</u> | 1 | 0 | 0 | 1 | 0 | 0 | 0 | 0 | 0 | 0 | 2 |
| <u>TPM3</u>    | 0 | 1 | 0 | 1 | 0 | 0 | 0 | 0 | 0 | 0 | 2 |
| <u>TSHR</u>    | 0 | 1 | 0 | 1 | 0 | 0 | 0 | 0 | 0 | 0 | 2 |
| <u>TXNRD1</u>  | 1 | 0 | 0 | 1 | 0 | 0 | 0 | 0 | 0 | 0 | 2 |

|                  |   |   |   |   |   |   |   |   |   |   |   |
|------------------|---|---|---|---|---|---|---|---|---|---|---|
| <u>UBE3A</u>     | 1 | 0 | 0 | 1 | 0 | 0 | 0 | 0 | 0 | 0 | 2 |
| <u>VEGFA</u>     | 1 | 0 | 0 | 1 | 0 | 0 | 0 | 0 | 0 | 0 | 2 |
| <u>VEGFA</u>     | 1 | 0 | 0 | 1 | 0 | 0 | 0 | 0 | 0 | 0 | 2 |
| <u>VEGFA</u>     | 1 | 0 | 0 | 1 | 0 | 0 | 0 | 0 | 0 | 0 | 2 |
| <u>VEGFA</u>     | 1 | 0 | 0 | 1 | 0 | 0 | 0 | 0 | 0 | 0 | 2 |
| <u>TRPV1</u>     | 1 | 0 | 0 | 1 | 0 | 0 | 0 | 0 | 0 | 0 | 2 |
| <u>Clorf116</u>  | 0 | 0 | 0 | 1 | 0 | 0 | 0 | 0 | 0 | 1 | 2 |
| <u>CHCHD7</u>    | 0 | 1 | 0 | 1 | 0 | 0 | 0 | 0 | 0 | 0 | 2 |
| <u>CHCHD7</u>    | 0 | 1 | 0 | 1 | 0 | 0 | 0 | 0 | 0 | 0 | 2 |
| <u>CALCA</u>     | 0 | 0 | 0 | 1 | 0 | 0 | 0 | 0 | 0 | 1 | 2 |
| <u>RPAP3</u>     | 0 | 1 | 0 | 1 | 0 | 0 | 0 | 0 | 0 | 0 | 2 |
| <u>SAP30L</u>    | 0 | 1 | 0 | 1 | 0 | 0 | 0 | 0 | 0 | 0 | 2 |
| <u>ZNF419</u>    | 0 | 0 | 0 | 1 | 0 | 0 | 0 | 0 | 0 | 1 | 2 |
| <u>CLMN</u>      | 0 | 1 | 0 | 1 | 0 | 0 | 0 | 0 | 0 | 0 | 2 |
| <u>ALG9</u>      | 0 | 0 | 0 | 1 | 0 | 0 | 0 | 0 | 0 | 1 | 2 |
| <u>CBLL1</u>     | 0 | 1 | 0 | 1 | 0 | 0 | 0 | 0 | 0 | 0 | 2 |
| <u>SYNPO2L</u>   | 1 | 0 | 0 | 1 | 0 | 0 | 0 | 0 | 0 | 0 | 2 |
| <u>MYST3</u>     | 1 | 0 | 0 | 1 | 0 | 0 | 0 | 0 | 0 | 0 | 2 |
| <u>OBFC1</u>     | 0 | 1 | 0 | 1 | 0 | 0 | 0 | 0 | 0 | 0 | 2 |
| <u>TRPM3</u>     | 0 | 0 | 0 | 1 | 0 | 0 | 0 | 0 | 0 | 1 | 2 |
| <u>PTGES2</u>    | 0 | 0 | 0 | 1 | 0 | 0 | 0 | 1 | 0 | 0 | 2 |
| <u>TM2D3</u>     | 1 | 0 | 0 | 1 | 0 | 0 | 0 | 0 | 0 | 0 | 2 |
| <u>RAB11FIP1</u> | 1 | 0 | 0 | 1 | 0 | 0 | 0 | 0 | 0 | 0 | 2 |
| <u>WDR26</u>     | 0 | 0 | 0 | 1 | 0 | 0 | 0 | 0 | 0 | 1 | 2 |
| <u>ADAM12</u>    | 1 | 0 | 0 | 1 | 0 | 0 | 0 | 0 | 0 | 0 | 2 |
| <u>CSRP3</u>     | 0 | 0 | 0 | 1 | 0 | 0 | 0 | 0 | 0 | 1 | 2 |
| <u>SSPN</u>      | 0 | 1 | 0 | 1 | 0 | 0 | 0 | 0 | 0 | 0 | 2 |
| <u>DDHD1</u>     | 0 | 0 | 0 | 1 | 0 | 0 | 1 | 0 | 0 | 0 | 2 |
| <u>TAF15</u>     | 0 | 0 | 0 | 1 | 0 | 0 | 0 | 0 | 0 | 1 | 2 |
| <u>PLA2G12A</u>  | 0 | 1 | 0 | 1 | 0 | 0 | 0 | 0 | 0 | 0 | 2 |
| <u>TSPAN14</u>   | 1 | 0 | 0 | 1 | 0 | 0 | 0 | 0 | 0 | 0 | 2 |
| <u>COLQ</u>      | 1 | 0 | 0 | 1 | 0 | 0 | 0 | 0 | 0 | 0 | 2 |
| <u>CASP1</u>     | 0 | 0 | 0 | 1 | 0 | 0 | 0 | 0 | 0 | 1 | 2 |
| <u>CASP1</u>     | 0 | 0 | 0 | 1 | 0 | 0 | 0 | 0 | 0 | 1 | 2 |
| <u>CASP1</u>     | 0 | 0 | 0 | 1 | 0 | 0 | 0 | 0 | 0 | 1 | 2 |
| <u>LRRC48</u>    | 0 | 0 | 0 | 1 | 0 | 0 | 0 | 0 | 0 | 1 | 2 |
| <u>APH1B</u>     | 0 | 1 | 0 | 1 | 0 | 0 | 0 | 0 | 0 | 0 | 2 |
| <u>CD99L2</u>    | 1 | 0 | 0 | 1 | 0 | 0 | 0 | 0 | 0 | 0 | 2 |
| <u>ATG10</u>     | 0 | 0 | 0 | 1 | 0 | 0 | 0 | 0 | 0 | 1 | 2 |
| <u>MRO</u>       | 0 | 1 | 0 | 1 | 0 | 0 | 0 | 0 | 0 | 0 | 2 |
| <u>MRO</u>       | 0 | 0 | 0 | 1 | 0 | 0 | 1 | 0 | 0 | 0 | 2 |

|                 |   |   |   |   |   |   |   |   |   |   |   |
|-----------------|---|---|---|---|---|---|---|---|---|---|---|
| <u>FCAMR</u>    | 0 | 1 | 0 | 1 | 0 | 0 | 0 | 0 | 0 | 0 | 2 |
| <u>FCAMR</u>    | 1 | 0 | 0 | 1 | 0 | 0 | 0 | 0 | 0 | 0 | 2 |
| <u>NCALD</u>    | 0 | 0 | 0 | 1 | 0 | 0 | 0 | 0 | 0 | 1 | 2 |
| <u>NCALD</u>    | 0 | 0 | 0 | 1 | 0 | 0 | 0 | 0 | 0 | 1 | 2 |
| <u>NCALD</u>    | 0 | 0 | 0 | 1 | 0 | 0 | 0 | 0 | 0 | 1 | 2 |
| <u>NCALD</u>    | 0 | 0 | 0 | 1 | 0 | 0 | 0 | 0 | 0 | 1 | 2 |
| <u>REG4</u>     | 0 | 1 | 0 | 1 | 0 | 0 | 0 | 0 | 0 | 0 | 2 |
| <u>CASP8</u>    | 1 | 0 | 0 | 1 | 0 | 0 | 0 | 0 | 0 | 0 | 2 |
| <u>CASP8</u>    | 1 | 0 | 0 | 1 | 0 | 0 | 0 | 0 | 0 | 0 | 2 |
| <u>CASP8</u>    | 1 | 0 | 0 | 1 | 0 | 0 | 0 | 0 | 0 | 0 | 2 |
| <u>CASP8</u>    | 1 | 0 | 0 | 1 | 0 | 0 | 0 | 0 | 0 | 0 | 2 |
| <u>ANTXR1</u>   | 0 | 1 | 0 | 1 | 0 | 0 | 0 | 0 | 0 | 0 | 2 |
| <u>MGC13057</u> | 0 | 0 | 0 | 1 | 0 | 0 | 0 | 0 | 0 | 1 | 2 |
| <u>C8orf53</u>  | 0 | 1 | 0 | 1 | 0 | 0 | 0 | 0 | 0 | 0 | 2 |
| <u>DYRK2</u>    | 0 | 0 | 0 | 1 | 0 | 0 | 0 | 0 | 0 | 1 | 2 |
| <u>L3MBTL3</u>  | 1 | 0 | 0 | 1 | 0 | 0 | 0 | 0 | 0 | 0 | 2 |
| <u>ZMAT1</u>    | 1 | 0 | 0 | 1 | 0 | 0 | 0 | 0 | 0 | 0 | 2 |
| <u>CUL4B</u>    | 1 | 0 | 0 | 1 | 0 | 0 | 0 | 0 | 0 | 0 | 2 |
| <u>ST6GAL2</u>  | 0 | 1 | 0 | 1 | 0 | 0 | 0 | 0 | 0 | 0 | 2 |
| <u>GTPBP3</u>   | 0 | 0 | 0 | 1 | 0 | 0 | 0 | 0 | 0 | 1 | 2 |
| <u>PTPN5</u>    | 1 | 0 | 0 | 1 | 0 | 0 | 0 | 0 | 0 | 0 | 2 |
| <u>PEX3</u>     | 0 | 1 | 0 | 1 | 0 | 0 | 0 | 0 | 0 | 0 | 2 |
| <u>DGKE</u>     | 0 | 1 | 0 | 1 | 0 | 0 | 0 | 0 | 0 | 0 | 2 |
| <u>AGPS</u>     | 0 | 1 | 0 | 1 | 0 | 0 | 0 | 0 | 0 | 0 | 2 |
| <u>CASK</u>     | 1 | 0 | 0 | 1 | 0 | 0 | 0 | 0 | 0 | 0 | 2 |
| <u>CASK</u>     | 1 | 0 | 0 | 1 | 0 | 0 | 0 | 0 | 0 | 0 | 2 |
| <u>SCARF1</u>   | 0 | 1 | 0 | 1 | 0 | 0 | 0 | 0 | 0 | 0 | 2 |
| <u>SCARF1</u>   | 0 | 0 | 0 | 1 | 0 | 0 | 1 | 0 | 0 | 0 | 2 |
| <u>STX16</u>    | 1 | 0 | 0 | 1 | 0 | 0 | 0 | 0 | 0 | 0 | 2 |
| <u>B3GALT2</u>  | 0 | 1 | 0 | 1 | 0 | 0 | 0 | 0 | 0 | 0 | 2 |
| <u>CCBL1</u>    | 1 | 0 | 0 | 1 | 0 | 0 | 0 | 0 | 0 | 0 | 2 |
| <u>CCBL1</u>    | 1 | 0 | 0 | 1 | 0 | 0 | 0 | 0 | 0 | 0 | 2 |
| <u>ARHGEF7</u>  | 0 | 0 | 0 | 1 | 0 | 0 | 0 | 0 | 0 | 1 | 2 |
| <u>MTMR3</u>    | 0 | 0 | 0 | 1 | 0 | 0 | 0 | 0 | 0 | 1 | 2 |
| <u>MTMR3</u>    | 0 | 0 | 0 | 1 | 0 | 0 | 0 | 0 | 0 | 1 | 2 |
| <u>USP13</u>    | 0 | 1 | 0 | 1 | 0 | 0 | 0 | 0 | 0 | 0 | 2 |
| <u>CCNG2</u>    | 0 | 1 | 0 | 1 | 0 | 0 | 0 | 0 | 0 | 0 | 2 |
| <u>TAF1A</u>    | 0 | 0 | 0 | 1 | 0 | 0 | 0 | 0 | 0 | 1 | 2 |
| <u>STARD13</u>  | 1 | 0 | 0 | 1 | 0 | 0 | 0 | 0 | 0 | 0 | 2 |
| <u>STARD13</u>  | 1 | 0 | 0 | 1 | 0 | 0 | 0 | 0 | 0 | 0 | 2 |
| <u>ZNF502</u>   | 1 | 0 | 0 | 1 | 0 | 0 | 0 | 0 | 0 | 0 | 2 |















|                 |   |   |   |   |   |   |   |   |   |   |   |
|-----------------|---|---|---|---|---|---|---|---|---|---|---|
| <u>DDX59</u>    | 1 | 0 | 0 | 0 | 0 | 0 | 0 | 0 | 0 | 1 | 2 |
| <u>ARMC10</u>   | 1 | 0 | 0 | 0 | 0 | 0 | 1 | 0 | 0 | 0 | 2 |
| <u>SYT15</u>    | 1 | 0 | 0 | 0 | 0 | 0 | 0 | 0 | 0 | 1 | 2 |
| <u>SPATA9</u>   | 1 | 0 | 0 | 0 | 0 | 0 | 0 | 0 | 0 | 1 | 2 |
| <u>SLC10A7</u>  | 1 | 0 | 0 | 0 | 0 | 0 | 0 | 0 | 0 | 1 | 2 |
| <u>CAMKK1</u>   | 1 | 0 | 0 | 0 | 0 | 0 | 0 | 0 | 0 | 1 | 2 |
| <u>MGC13057</u> | 1 | 0 | 0 | 0 | 0 | 0 | 0 | 0 | 0 | 1 | 2 |
| <u>EFCAB2</u>   | 1 | 0 | 0 | 0 | 0 | 0 | 1 | 0 | 0 | 0 | 2 |
| <u>CASP10</u>   | 1 | 0 | 0 | 0 | 0 | 0 | 0 | 0 | 0 | 1 | 2 |
| <u>NCK2</u>     | 1 | 0 | 0 | 0 | 0 | 0 | 1 | 0 | 0 | 0 | 2 |
| <u>ATRN</u>     | 1 | 0 | 0 | 0 | 0 | 0 | 0 | 0 | 0 | 1 | 2 |
| <u>CAPS2</u>    | 1 | 0 | 0 | 0 | 0 | 0 | 1 | 0 | 0 | 0 | 2 |
| <u>PPFIA1</u>   | 1 | 0 | 0 | 0 | 0 | 0 | 0 | 0 | 0 | 1 | 2 |
| <u>CDC14A</u>   | 1 | 0 | 0 | 0 | 0 | 0 | 0 | 0 | 0 | 1 | 2 |
| <u>CDC14A</u>   | 1 | 0 | 0 | 0 | 0 | 0 | 0 | 0 | 0 | 1 | 2 |
| <u>MADD</u>     | 1 | 0 | 0 | 0 | 0 | 0 | 0 | 0 | 0 | 1 | 2 |
| <u>TP63</u>     | 1 | 0 | 0 | 0 | 0 | 0 | 0 | 0 | 0 | 1 | 2 |
| <u>TP63</u>     | 1 | 0 | 0 | 0 | 0 | 0 | 0 | 0 | 0 | 1 | 2 |
| <u>PDE5A</u>    | 1 | 0 | 0 | 0 | 0 | 0 | 0 | 0 | 0 | 1 | 2 |
| <u>KRIT1</u>    | 1 | 0 | 0 | 0 | 0 | 0 | 0 | 0 | 0 | 1 | 2 |
| <u>PHLDB2</u>   | 1 | 0 | 0 | 0 | 0 | 0 | 0 | 0 | 0 | 1 | 2 |
| <u>ACVR1B</u>   | 1 | 0 | 0 | 0 | 0 | 0 | 0 | 0 | 0 | 1 | 2 |
| <u>ACVR1B</u>   | 1 | 0 | 0 | 0 | 0 | 0 | 0 | 0 | 0 | 1 | 2 |
| <u>CCDC149</u>  | 1 | 0 | 0 | 0 | 0 | 0 | 0 | 0 | 0 | 1 | 2 |
| <u>MYADM</u>    | 1 | 0 | 0 | 0 | 0 | 0 | 0 | 0 | 0 | 1 | 2 |
| <u>NRXN3</u>    | 1 | 0 | 0 | 0 | 0 | 0 | 0 | 0 | 0 | 1 | 2 |
| <u>FOXP2</u>    | 1 | 1 | 0 | 0 | 0 | 0 | 0 | 0 | 0 | 0 | 2 |
| <u>GRAP2</u>    | 1 | 1 | 0 | 0 | 0 | 0 | 0 | 0 | 0 | 0 | 2 |
| <u>C21orf66</u> | 1 | 0 | 0 | 0 | 0 | 0 | 0 | 0 | 0 | 1 | 2 |
| <u>SIGLEC6</u>  | 1 | 0 | 0 | 0 | 0 | 0 | 1 | 0 | 0 | 0 | 2 |
| <u>PTGES</u>    | 1 | 0 | 0 | 0 | 0 | 0 | 1 | 0 | 0 | 0 | 2 |
| <u>ENTPD6</u>   | 1 | 0 | 0 | 0 | 0 | 0 | 0 | 0 | 0 | 1 | 2 |
| <u>RNF14</u>    | 1 | 0 | 0 | 0 | 0 | 0 | 0 | 0 | 0 | 1 | 2 |
| <u>HS2ST1</u>   | 1 | 0 | 0 | 0 | 0 | 0 | 0 | 0 | 0 | 1 | 2 |
| <u>SGSM2</u>    | 1 | 0 | 0 | 0 | 0 | 0 | 0 | 0 | 0 | 1 | 2 |
| <u>SGSM2</u>    | 1 | 0 | 0 | 0 | 0 | 0 | 0 | 0 | 0 | 1 | 2 |
| <u>CDH3</u>     | 0 | 1 | 0 | 0 | 0 | 0 | 1 | 0 | 0 | 0 | 2 |
| <u>CDH9</u>     | 0 | 1 | 0 | 0 | 0 | 0 | 1 | 0 | 0 | 0 | 2 |
| <u>HUWE1</u>    | 0 | 1 | 0 | 0 | 0 | 0 | 1 | 0 | 0 | 0 | 2 |
| <u>RAD50</u>    | 0 | 1 | 0 | 0 | 0 | 0 | 1 | 0 | 0 | 0 | 2 |
| <u>FRY</u>      | 0 | 1 | 0 | 0 | 0 | 0 | 1 | 0 | 0 | 0 | 2 |



|                  |   |   |   |   |   |   |   |   |   |   |   |
|------------------|---|---|---|---|---|---|---|---|---|---|---|
| <u>GLIPR1</u>    | 0 | 1 | 0 | 0 | 0 | 0 | 1 | 0 | 0 | 0 | 2 |
| <u>CHD3</u>      | 0 | 1 | 0 | 0 | 0 | 0 | 1 | 0 | 0 | 0 | 2 |
| <u>KERA</u>      | 0 | 1 | 0 | 0 | 0 | 0 | 0 | 0 | 0 | 1 | 2 |
| <u>KRR1</u>      | 0 | 1 | 0 | 0 | 0 | 0 | 1 | 0 | 0 | 0 | 2 |
| <u>FGFR1OP</u>   | 0 | 1 | 0 | 0 | 0 | 0 | 1 | 0 | 0 | 0 | 2 |
| <u>BVES</u>      | 0 | 1 | 0 | 0 | 0 | 0 | 0 | 0 | 0 | 1 | 2 |
| <u>NISCH</u>     | 0 | 1 | 0 | 0 | 0 | 0 | 1 | 0 | 0 | 0 | 2 |
| <u>SNF8</u>      | 0 | 1 | 0 | 0 | 0 | 0 | 1 | 0 | 0 | 0 | 2 |
| <u>B4GALT7</u>   | 0 | 1 | 0 | 0 | 0 | 0 | 1 | 0 | 0 | 0 | 2 |
| <u>TP53RK</u>    | 0 | 1 | 0 | 0 | 0 | 0 | 1 | 0 | 0 | 0 | 2 |
| <u>CHRM2</u>     | 0 | 1 | 0 | 0 | 0 | 0 | 0 | 0 | 0 | 1 | 2 |
| <u>STK38</u>     | 0 | 1 | 0 | 0 | 0 | 0 | 1 | 0 | 0 | 0 | 2 |
| <u>TOE1</u>      | 0 | 1 | 0 | 0 | 0 | 0 | 1 | 0 | 0 | 0 | 2 |
| <u>CYGB</u>      | 0 | 1 | 0 | 0 | 0 | 0 | 1 | 0 | 0 | 0 | 2 |
| <u>ZNF452</u>    | 0 | 1 | 0 | 0 | 0 | 0 | 1 | 0 | 0 | 0 | 2 |
| <u>PWWP2A</u>    | 0 | 1 | 0 | 0 | 0 | 0 | 0 | 0 | 0 | 1 | 2 |
| <u>FBXO32</u>    | 0 | 1 | 0 | 0 | 0 | 0 | 1 | 0 | 0 | 0 | 2 |
| <u>MRFAP1L1</u>  | 0 | 1 | 0 | 0 | 0 | 0 | 0 | 0 | 0 | 1 | 2 |
| <u>FAM46B</u>    | 0 | 1 | 0 | 0 | 0 | 0 | 1 | 0 | 0 | 0 | 2 |
| <u>WDR17</u>     | 0 | 1 | 0 | 0 | 0 | 0 | 0 | 0 | 0 | 1 | 2 |
| <u>CATSPER2</u>  | 0 | 1 | 0 | 0 | 0 | 0 | 0 | 0 | 0 | 1 | 2 |
| <u>LOH12CR1</u>  | 0 | 1 | 0 | 0 | 0 | 0 | 1 | 0 | 0 | 0 | 2 |
| <u>CLK1</u>      | 0 | 1 | 0 | 0 | 0 | 0 | 0 | 0 | 0 | 1 | 2 |
| <u>TMEM45B</u>   | 0 | 1 | 0 | 0 | 0 | 0 | 1 | 0 | 0 | 0 | 2 |
| <u>DPH4</u>      | 0 | 1 | 0 | 0 | 0 | 0 | 1 | 0 | 0 | 0 | 2 |
| <u>TMEM16D</u>   | 0 | 1 | 0 | 0 | 0 | 0 | 1 | 0 | 0 | 0 | 2 |
| <u>FRMD6</u>     | 0 | 1 | 0 | 0 | 0 | 0 | 0 | 0 | 0 | 1 | 2 |
| <u>TTC8</u>      | 0 | 1 | 0 | 0 | 0 | 0 | 1 | 0 | 0 | 0 | 2 |
| <u>SLC25A29</u>  | 0 | 1 | 0 | 0 | 0 | 0 | 1 | 0 | 0 | 0 | 2 |
| <u>LOC124446</u> | 0 | 1 | 0 | 0 | 0 | 0 | 1 | 0 | 0 | 0 | 2 |
| <u>SMCR7</u>     | 0 | 1 | 0 | 0 | 0 | 0 | 0 | 0 | 0 | 1 | 2 |
| <u>COX6B2</u>    | 0 | 1 | 0 | 0 | 0 | 0 | 1 | 0 | 0 | 0 | 2 |
| <u>C19orf28</u>  | 0 | 1 | 0 | 0 | 0 | 0 | 1 | 0 | 0 | 0 | 2 |
| <u>DMBX1</u>     | 0 | 1 | 0 | 0 | 0 | 0 | 1 | 0 | 0 | 0 | 2 |
| <u>RNF19B</u>    | 0 | 1 | 0 | 0 | 0 | 0 | 0 | 0 | 0 | 1 | 2 |
| <u>KLHDC7A</u>   | 0 | 1 | 0 | 0 | 0 | 0 | 1 | 0 | 0 | 0 | 2 |
| <u>COL3A1</u>    | 0 | 1 | 0 | 0 | 0 | 0 | 1 | 0 | 0 | 0 | 2 |
| <u>COL4A4</u>    | 0 | 1 | 0 | 0 | 0 | 0 | 1 | 0 | 0 | 0 | 2 |
| <u>COL5A2</u>    | 0 | 1 | 0 | 0 | 0 | 0 | 0 | 0 | 0 | 1 | 2 |
| <u>LOC129293</u> | 0 | 1 | 0 | 0 | 0 | 0 | 1 | 0 | 0 | 0 | 2 |
| <u>TAF8</u>      | 0 | 1 | 0 | 0 | 0 | 0 | 1 | 0 | 0 | 0 | 2 |







|                 |   |   |   |   |   |   |   |   |   |   |   |
|-----------------|---|---|---|---|---|---|---|---|---|---|---|
| <u>EDN3</u>     | 0 | 1 | 0 | 0 | 0 | 0 | 0 | 0 | 0 | 1 | 2 |
| <u>EDN3</u>     | 0 | 1 | 0 | 0 | 0 | 0 | 0 | 0 | 0 | 1 | 2 |
| <u>B3GNT6</u>   | 0 | 1 | 0 | 0 | 0 | 0 | 1 | 0 | 0 | 0 | 2 |
| <u>EGFR</u>     | 0 | 1 | 0 | 0 | 0 | 0 | 1 | 0 | 0 | 0 | 2 |
| <u>C9orf21</u>  | 0 | 1 | 0 | 0 | 0 | 0 | 1 | 0 | 0 | 0 | 2 |
| <u>CCDC131</u>  | 0 | 1 | 0 | 0 | 0 | 0 | 0 | 0 | 0 | 1 | 2 |
| <u>EPHA2</u>    | 0 | 1 | 0 | 0 | 0 | 0 | 1 | 0 | 0 | 0 | 2 |
| <u>MLKL</u>     | 0 | 1 | 0 | 0 | 0 | 0 | 1 | 0 | 0 | 0 | 2 |
| <u>ZNF778</u>   | 0 | 1 | 0 | 0 | 0 | 0 | 1 | 0 | 0 | 0 | 2 |
| <u>ELAVL1</u>   | 0 | 1 | 0 | 0 | 0 | 0 | 1 | 0 | 0 | 0 | 2 |
| <u>ELF2</u>     | 0 | 1 | 0 | 0 | 0 | 0 | 1 | 0 | 0 | 0 | 2 |
| <u>C1orf168</u> | 0 | 1 | 0 | 0 | 0 | 0 | 1 | 0 | 0 | 0 | 2 |
| <u>TMEM201</u>  | 0 | 1 | 0 | 0 | 0 | 0 | 1 | 0 | 0 | 0 | 2 |
| <u>SLFN1</u>    | 0 | 1 | 0 | 0 | 0 | 0 | 1 | 0 | 0 | 0 | 2 |
| <u>TET3</u>     | 0 | 1 | 0 | 0 | 0 | 0 | 1 | 0 | 0 | 0 | 2 |
| <u>EML1</u>     | 0 | 1 | 0 | 0 | 0 | 0 | 0 | 0 | 0 | 1 | 2 |
| <u>VSTM3</u>    | 0 | 1 | 0 | 0 | 0 | 0 | 1 | 0 | 0 | 0 | 2 |
| <u>TMEM154</u>  | 0 | 1 | 0 | 0 | 0 | 0 | 1 | 0 | 0 | 0 | 2 |
| <u>TMEM192</u>  | 0 | 1 | 0 | 0 | 0 | 0 | 1 | 0 | 0 | 0 | 2 |
| <u>DNAJC18</u>  | 0 | 1 | 0 | 0 | 0 | 0 | 1 | 0 | 0 | 0 | 2 |
| <u>ENSA</u>     | 0 | 1 | 0 | 0 | 0 | 0 | 0 | 0 | 0 | 1 | 2 |
| <u>EPB49</u>    | 0 | 1 | 0 | 0 | 0 | 0 | 0 | 0 | 0 | 1 | 2 |
| <u>SENP5</u>    | 0 | 1 | 0 | 0 | 0 | 0 | 0 | 0 | 0 | 1 | 2 |
| <u>ETFDH</u>    | 0 | 1 | 0 | 0 | 0 | 0 | 1 | 0 | 0 | 0 | 2 |
| <u>EXTL3</u>    | 0 | 1 | 0 | 0 | 0 | 0 | 1 | 0 | 0 | 0 | 2 |
| <u>F13A1</u>    | 0 | 1 | 0 | 0 | 0 | 0 | 1 | 0 | 0 | 0 | 2 |
| <u>FANCA</u>    | 0 | 1 | 0 | 0 | 0 | 0 | 1 | 0 | 0 | 0 | 2 |
| <u>ACSL3</u>    | 0 | 1 | 0 | 0 | 0 | 0 | 0 | 0 | 0 | 1 | 2 |
| <u>FANCG</u>    | 0 | 1 | 0 | 0 | 0 | 0 | 1 | 0 | 0 | 0 | 2 |
| <u>ALDH1A3</u>  | 0 | 1 | 0 | 0 | 0 | 0 | 1 | 0 | 0 | 0 | 2 |
| <u>VWCE</u>     | 0 | 1 | 0 | 0 | 0 | 0 | 1 | 0 | 0 | 0 | 2 |
| <u>SLC16A9</u>  | 0 | 1 | 0 | 0 | 0 | 0 | 1 | 0 | 0 | 0 | 2 |
| <u>NT5DC1</u>   | 0 | 1 | 0 | 0 | 0 | 0 | 1 | 0 | 0 | 0 | 2 |
| <u>ZBTB9</u>    | 0 | 1 | 0 | 0 | 0 | 0 | 1 | 0 | 0 | 0 | 2 |
| <u>SDK1</u>     | 0 | 1 | 0 | 0 | 0 | 0 | 1 | 0 | 0 | 0 | 2 |
| <u>DAGLB</u>    | 0 | 1 | 0 | 0 | 0 | 0 | 1 | 0 | 0 | 0 | 2 |
| <u>SCUBE3</u>   | 0 | 1 | 0 | 0 | 0 | 0 | 1 | 0 | 0 | 0 | 2 |
| <u>GPC4</u>     | 0 | 1 | 0 | 0 | 0 | 0 | 1 | 0 | 0 | 0 | 2 |
| <u>IKZF2</u>    | 0 | 1 | 0 | 0 | 0 | 0 | 0 | 0 | 0 | 1 | 2 |
| <u>PPM1E</u>    | 0 | 1 | 0 | 0 | 0 | 0 | 1 | 0 | 0 | 0 | 2 |
| <u>ANKRD26</u>  | 0 | 1 | 0 | 0 | 0 | 0 | 1 | 0 | 0 | 0 | 2 |

|                    |   |   |   |   |   |   |   |   |   |   |   |
|--------------------|---|---|---|---|---|---|---|---|---|---|---|
| <u>NLRP1</u>       | 0 | 1 | 0 | 0 | 0 | 0 | 1 | 0 | 0 | 0 | 2 |
| <u>NLGN1</u>       | 0 | 1 | 0 | 0 | 0 | 0 | 1 | 0 | 0 | 0 | 2 |
| <u>FOXJ3</u>       | 0 | 1 | 0 | 0 | 0 | 0 | 0 | 0 | 0 | 1 | 2 |
| <u>FOXG1</u>       | 0 | 1 | 0 | 0 | 0 | 0 | 1 | 0 | 0 | 0 | 2 |
| <u>FOXF1</u>       | 0 | 1 | 0 | 0 | 0 | 0 | 1 | 0 | 0 | 0 | 2 |
| <u>SHANK2</u>      | 0 | 1 | 0 | 0 | 0 | 0 | 1 | 0 | 0 | 0 | 2 |
| <u>DKK1</u>        | 0 | 1 | 0 | 0 | 0 | 0 | 0 | 0 | 0 | 1 | 2 |
| <u>CCT5</u>        | 0 | 1 | 0 | 0 | 0 | 0 | 1 | 0 | 0 | 0 | 2 |
| <u>PAXIP1</u>      | 0 | 1 | 0 | 0 | 0 | 0 | 1 | 0 | 0 | 0 | 2 |
| <u>NT5C2</u>       | 0 | 1 | 0 | 0 | 0 | 0 | 0 | 0 | 0 | 1 | 2 |
| <u>MAPKBP1</u>     | 0 | 1 | 0 | 0 | 0 | 0 | 0 | 0 | 0 | 1 | 2 |
| <u>STK38L</u>      | 0 | 1 | 0 | 0 | 0 | 0 | 1 | 0 | 0 | 0 | 2 |
| <u>FAIM2</u>       | 0 | 1 | 0 | 0 | 0 | 0 | 1 | 0 | 0 | 0 | 2 |
| <u>ASCC3L1</u>     | 0 | 1 | 0 | 0 | 0 | 0 | 1 | 0 | 0 | 0 | 2 |
| <u>KIAA0082</u>    | 0 | 1 | 0 | 0 | 0 | 0 | 0 | 0 | 0 | 1 | 2 |
| <u>TXNDC4</u>      | 0 | 1 | 0 | 0 | 0 | 0 | 1 | 0 | 0 | 0 | 2 |
| <u>HECW1</u>       | 0 | 1 | 0 | 0 | 0 | 0 | 1 | 0 | 0 | 0 | 2 |
| <u>UHRF1BP1L</u>   | 0 | 1 | 0 | 0 | 0 | 0 | 1 | 0 | 0 | 0 | 2 |
| <u>SWAP70</u>      | 0 | 1 | 0 | 0 | 0 | 0 | 1 | 0 | 0 | 0 | 2 |
| <u>ERC1</u>        | 0 | 1 | 0 | 0 | 0 | 0 | 0 | 0 | 0 | 1 | 2 |
| <u>FOXO3</u>       | 0 | 1 | 0 | 0 | 0 | 0 | 1 | 0 | 0 | 0 | 2 |
| <u>IQSEC2</u>      | 0 | 1 | 0 | 0 | 0 | 0 | 0 | 0 | 0 | 1 | 2 |
| <u>IQSEC2</u>      | 0 | 1 | 0 | 0 | 0 | 0 | 0 | 0 | 0 | 1 | 2 |
| <u>FSTL4</u>       | 0 | 1 | 0 | 0 | 0 | 0 | 1 | 0 | 0 | 0 | 2 |
| <u>FLI1</u>        | 0 | 1 | 0 | 0 | 0 | 0 | 1 | 0 | 0 | 0 | 2 |
| <u>ZZEF1</u>       | 0 | 1 | 0 | 0 | 0 | 0 | 1 | 0 | 0 | 0 | 2 |
| <u>GGA3</u>        | 0 | 1 | 0 | 0 | 0 | 0 | 1 | 0 | 0 | 0 | 2 |
| <u>KIAA0157</u>    | 0 | 1 | 0 | 0 | 0 | 0 | 0 | 0 | 0 | 1 | 2 |
| <u>FLNC</u>        | 0 | 1 | 0 | 0 | 0 | 0 | 1 | 0 | 0 | 0 | 2 |
| <u>ARL6IP1</u>     | 0 | 1 | 0 | 0 | 0 | 0 | 1 | 0 | 0 | 0 | 2 |
| <u>JMJD6</u>       | 0 | 1 | 0 | 0 | 0 | 0 | 0 | 0 | 0 | 1 | 2 |
| <u>FLT3</u>        | 0 | 1 | 0 | 0 | 0 | 0 | 1 | 0 | 0 | 0 | 2 |
| <u>RRP12</u>       | 0 | 1 | 0 | 0 | 0 | 0 | 1 | 0 | 0 | 0 | 2 |
| <u>KIAA0746</u>    | 0 | 1 | 0 | 0 | 0 | 0 | 1 | 0 | 0 | 0 | 2 |
| <u>PLCB1</u>       | 0 | 1 | 0 | 0 | 0 | 0 | 0 | 0 | 0 | 1 | 2 |
| <u>RP1-21O18.1</u> | 0 | 1 | 0 | 0 | 0 | 0 | 0 | 0 | 0 | 1 | 2 |
| <u>SCFD1</u>       | 0 | 1 | 0 | 0 | 0 | 0 | 1 | 0 | 0 | 0 | 2 |
| <u>FMO2</u>        | 0 | 1 | 0 | 0 | 0 | 0 | 1 | 0 | 0 | 0 | 2 |
| <u>KIAA0774</u>    | 0 | 1 | 0 | 0 | 0 | 0 | 1 | 0 | 0 | 0 | 2 |
| <u>FBXW11</u>      | 0 | 1 | 0 | 0 | 0 | 0 | 1 | 0 | 0 | 0 | 2 |
| <u>MGRN1</u>       | 0 | 1 | 0 | 0 | 0 | 0 | 1 | 0 | 0 | 0 | 2 |

|               |   |   |   |   |   |   |   |   |   |   |   |
|---------------|---|---|---|---|---|---|---|---|---|---|---|
| CUX2          | 0 | 1 | 0 | 0 | 0 | 0 | 1 | 0 | 0 | 0 | 2 |
| VPS39         | 0 | 1 | 0 | 0 | 0 | 0 | 1 | 0 | 0 | 0 | 2 |
| DNAJC16       | 0 | 1 | 0 | 0 | 0 | 0 | 0 | 0 | 0 | 1 | 2 |
| USP24         | 0 | 1 | 0 | 0 | 0 | 0 | 0 | 0 | 0 | 1 | 2 |
| KIAA0892      | 0 | 1 | 0 | 0 | 0 | 0 | 1 | 0 | 0 | 0 | 2 |
| MED13L        | 0 | 1 | 0 | 0 | 0 | 0 | 1 | 0 | 0 | 0 | 2 |
| DICER1        | 0 | 1 | 0 | 0 | 0 | 0 | 0 | 0 | 0 | 1 | 2 |
| SIRT5         | 0 | 1 | 0 | 0 | 0 | 0 | 0 | 0 | 0 | 1 | 2 |
| ANGPTL2       | 0 | 1 | 0 | 0 | 0 | 0 | 1 | 0 | 0 | 0 | 2 |
| GCAT          | 0 | 1 | 0 | 0 | 0 | 0 | 1 | 0 | 0 | 0 | 2 |
| TRAM1         | 0 | 1 | 0 | 0 | 0 | 0 | 1 | 0 | 0 | 0 | 2 |
| LEPROTL1      | 0 | 1 | 0 | 0 | 0 | 0 | 1 | 0 | 0 | 0 | 2 |
| SUZ12         | 0 | 1 | 0 | 0 | 0 | 0 | 1 | 0 | 0 | 0 | 2 |
| TNPO3         | 0 | 1 | 0 | 0 | 0 | 0 | 1 | 0 | 0 | 0 | 2 |
| FOSB          | 0 | 1 | 0 | 0 | 0 | 0 | 1 | 0 | 0 | 0 | 2 |
| SEZ6L         | 0 | 1 | 0 | 0 | 0 | 0 | 1 | 0 | 0 | 0 | 2 |
| KCNE1L        | 0 | 1 | 0 | 0 | 0 | 0 | 1 | 0 | 0 | 0 | 2 |
| KCNE4         | 0 | 1 | 0 | 0 | 0 | 0 | 1 | 0 | 0 | 0 | 2 |
| CADM1         | 0 | 1 | 0 | 0 | 0 | 0 | 1 | 0 | 0 | 0 | 2 |
| MTCH1         | 0 | 1 | 0 | 0 | 0 | 0 | 1 | 0 | 0 | 0 | 2 |
| FXN           | 0 | 1 | 0 | 0 | 0 | 0 | 0 | 0 | 0 | 1 | 2 |
| NR5A1         | 0 | 1 | 0 | 0 | 0 | 0 | 0 | 0 | 0 | 1 | 2 |
| ZBTB38        | 0 | 1 | 0 | 0 | 0 | 0 | 1 | 0 | 0 | 0 | 2 |
| GARNL1        | 0 | 1 | 0 | 0 | 0 | 0 | 0 | 0 | 0 | 1 | 2 |
| ZDHHC23       | 0 | 1 | 0 | 0 | 0 | 0 | 1 | 0 | 0 | 0 | 2 |
| MPV17L        | 0 | 1 | 0 | 0 | 0 | 0 | 0 | 0 | 0 | 1 | 2 |
| MPV17L        | 0 | 1 | 0 | 0 | 0 | 0 | 0 | 0 | 0 | 1 | 2 |
| CXorf23       | 0 | 1 | 0 | 0 | 0 | 0 | 1 | 0 | 0 | 0 | 2 |
| SNX33         | 0 | 1 | 0 | 0 | 0 | 0 | 1 | 0 | 0 | 0 | 2 |
| SLC39A6       | 0 | 1 | 0 | 0 | 0 | 0 | 1 | 0 | 0 | 0 | 2 |
| LMOD1         | 0 | 1 | 0 | 0 | 0 | 0 | 1 | 0 | 0 | 0 | 2 |
| ATXN10        | 0 | 1 | 0 | 0 | 0 | 0 | 1 | 0 | 0 | 0 | 2 |
| TNFAIP8       | 0 | 1 | 0 | 0 | 0 | 0 | 1 | 0 | 0 | 0 | 2 |
| FBXL2         | 0 | 1 | 0 | 0 | 0 | 0 | 1 | 0 | 0 | 0 | 2 |
| SULT4A1       | 0 | 1 | 0 | 0 | 0 | 0 | 1 | 0 | 0 | 0 | 2 |
| DKFZP434B0335 | 0 | 1 | 0 | 0 | 0 | 0 | 0 | 0 | 1 | 0 | 2 |
| SOSTDC1       | 0 | 1 | 0 | 0 | 0 | 0 | 0 | 0 | 0 | 1 | 2 |
| C20orf194     | 0 | 1 | 0 | 0 | 0 | 0 | 1 | 0 | 0 | 0 | 2 |
| TIPARP        | 0 | 1 | 0 | 0 | 0 | 0 | 0 | 0 | 0 | 1 | 2 |
| SNED1         | 0 | 1 | 0 | 0 | 0 | 0 | 0 | 1 | 0 | 0 | 2 |

|                  |   |   |   |   |   |   |   |   |   |   |   |
|------------------|---|---|---|---|---|---|---|---|---|---|---|
| <u>GORASP2</u>   | 0 | 1 | 0 | 0 | 0 | 0 | 0 | 0 | 1 | 0 | 2 |
| <u>ZNF500</u>    | 0 | 1 | 0 | 0 | 0 | 0 | 1 | 0 | 0 | 0 | 2 |
| <u>RAB11FIP5</u> | 0 | 1 | 0 | 0 | 0 | 0 | 1 | 0 | 0 | 0 | 2 |
| <u>ANKRD17</u>   | 0 | 1 | 0 | 0 | 0 | 0 | 1 | 0 | 0 | 0 | 2 |
| <u>GIGYF2</u>    | 0 | 1 | 0 | 0 | 0 | 0 | 0 | 0 | 0 | 1 | 2 |
| <u>LSM14A</u>    | 0 | 1 | 0 | 0 | 0 | 0 | 0 | 0 | 0 | 1 | 2 |
| <u>LSM14A</u>    | 0 | 1 | 0 | 0 | 0 | 0 | 0 | 0 | 0 | 1 | 2 |
| <u>CCDC9</u>     | 0 | 1 | 0 | 0 | 0 | 0 | 1 | 0 | 0 | 0 | 2 |
| <u>LDLRAP1</u>   | 0 | 1 | 0 | 0 | 0 | 0 | 1 | 0 | 0 | 0 | 2 |
| <u>STEAP2</u>    | 0 | 1 | 0 | 0 | 0 | 0 | 1 | 0 | 0 | 0 | 2 |
| <u>PITPNC1</u>   | 0 | 1 | 0 | 0 | 0 | 0 | 0 | 0 | 0 | 1 | 2 |
| <u>PITPNC1</u>   | 0 | 1 | 0 | 0 | 0 | 0 | 0 | 0 | 0 | 1 | 2 |
| <u>FBXO22</u>    | 0 | 1 | 0 | 0 | 0 | 0 | 1 | 0 | 0 | 0 | 2 |
| <u>ARFGAP3</u>   | 0 | 1 | 0 | 0 | 0 | 0 | 1 | 0 | 0 | 0 | 2 |
| <u>GCH1</u>      | 0 | 1 | 0 | 0 | 0 | 0 | 1 | 0 | 0 | 0 | 2 |
| <u>GCN5L2</u>    | 0 | 1 | 0 | 0 | 0 | 0 | 1 | 0 | 0 | 0 | 2 |
| <u>GCNT1</u>     | 0 | 1 | 0 | 0 | 0 | 0 | 0 | 0 | 0 | 1 | 2 |
| <u>FXC1</u>      | 0 | 1 | 0 | 0 | 0 | 0 | 1 | 0 | 0 | 0 | 2 |
| <u>TIMM13</u>    | 0 | 1 | 0 | 0 | 0 | 0 | 1 | 0 | 0 | 0 | 2 |
| <u>EIF2C1</u>    | 0 | 1 | 0 | 0 | 0 | 0 | 1 | 0 | 0 | 0 | 2 |
| <u>IL1F5</u>     | 0 | 1 | 0 | 0 | 0 | 0 | 0 | 0 | 0 | 1 | 2 |
| <u>TBL2</u>      | 0 | 1 | 0 | 0 | 0 | 0 | 1 | 0 | 0 | 0 | 2 |
| <u>BEST4</u>     | 0 | 1 | 0 | 0 | 0 | 0 | 1 | 0 | 0 | 0 | 2 |
| <u>GPR110</u>    | 0 | 1 | 0 | 0 | 0 | 0 | 1 | 0 | 0 | 0 | 2 |
| <u>GPR160</u>    | 0 | 1 | 0 | 0 | 0 | 0 | 1 | 0 | 0 | 0 | 2 |
| <u>TCL6</u>      | 0 | 1 | 0 | 0 | 0 | 0 | 1 | 0 | 0 | 0 | 2 |
| <u>GJA4</u>      | 0 | 1 | 0 | 0 | 0 | 0 | 1 | 0 | 0 | 0 | 2 |
| <u>FOXD3</u>     | 0 | 1 | 0 | 0 | 0 | 0 | 0 | 0 | 0 | 1 | 2 |
| <u>NOX1</u>      | 0 | 1 | 0 | 0 | 0 | 0 | 1 | 0 | 0 | 0 | 2 |
| <u>ANKRD1</u>    | 0 | 1 | 0 | 0 | 0 | 0 | 1 | 0 | 0 | 0 | 2 |
| <u>PDE7B</u>     | 0 | 1 | 0 | 0 | 0 | 0 | 1 | 0 | 0 | 0 | 2 |
| <u>GPR81</u>     | 0 | 1 | 0 | 0 | 0 | 0 | 1 | 0 | 0 | 0 | 2 |
| <u>GLB1</u>      | 0 | 1 | 0 | 0 | 0 | 0 | 1 | 0 | 0 | 0 | 2 |
| <u>PDCD4</u>     | 0 | 1 | 0 | 0 | 0 | 0 | 0 | 0 | 0 | 1 | 2 |
| <u>PCDH17</u>    | 0 | 1 | 0 | 0 | 0 | 0 | 1 | 0 | 0 | 0 | 2 |
| <u>GCLM</u>      | 0 | 1 | 0 | 0 | 0 | 0 | 0 | 0 | 0 | 1 | 2 |
| <u>TMEM97</u>    | 0 | 1 | 0 | 0 | 0 | 0 | 0 | 0 | 0 | 1 | 2 |
| <u>STK39</u>     | 0 | 1 | 0 | 0 | 0 | 0 | 1 | 0 | 0 | 0 | 2 |
| <u>GLP1R</u>     | 0 | 1 | 0 | 0 | 0 | 0 | 1 | 0 | 0 | 0 | 2 |
| <u>CECR6</u>     | 0 | 1 | 0 | 0 | 0 | 0 | 1 | 0 | 0 | 0 | 2 |
| <u>GNB1</u>      | 0 | 1 | 0 | 0 | 0 | 0 | 1 | 0 | 0 | 0 | 2 |

|                 |   |   |   |   |   |   |   |   |   |   |   |
|-----------------|---|---|---|---|---|---|---|---|---|---|---|
| <u>GNRHR</u>    | 0 | 1 | 0 | 0 | 0 | 0 | 0 | 0 | 0 | 1 | 2 |
| <u>GOLGB1</u>   | 0 | 1 | 0 | 0 | 0 | 0 | 1 | 0 | 0 | 0 | 2 |
| <u>SLCO4A1</u>  | 0 | 1 | 0 | 0 | 0 | 0 | 1 | 0 | 0 | 0 | 2 |
| <u>GPR4</u>     | 0 | 1 | 0 | 0 | 0 | 0 | 1 | 0 | 0 | 0 | 2 |
| <u>MKX</u>      | 0 | 1 | 0 | 0 | 0 | 0 | 1 | 0 | 0 | 0 | 2 |
| <u>FLJ33790</u> | 0 | 1 | 0 | 0 | 0 | 0 | 1 | 0 | 0 | 0 | 2 |
| <u>KCTD21</u>   | 0 | 1 | 0 | 0 | 0 | 0 | 1 | 0 | 0 | 0 | 2 |
| <u>ZDHHC22</u>  | 0 | 1 | 0 | 0 | 0 | 0 | 1 | 0 | 0 | 0 | 2 |
| <u>C14orf24</u> | 0 | 1 | 0 | 0 | 0 | 0 | 0 | 0 | 0 | 1 | 2 |
| <u>CDRT4</u>    | 0 | 1 | 0 | 0 | 0 | 0 | 1 | 0 | 0 | 0 | 2 |
| <u>LYPD5</u>    | 0 | 1 | 0 | 0 | 0 | 0 | 0 | 0 | 0 | 1 | 2 |
| <u>HKR1</u>     | 0 | 1 | 0 | 0 | 0 | 0 | 1 | 0 | 0 | 0 | 2 |
| <u>DNAJC5G</u>  | 0 | 1 | 0 | 0 | 0 | 0 | 1 | 0 | 0 | 0 | 2 |
| <u>DLL1</u>     | 0 | 1 | 0 | 0 | 0 | 0 | 1 | 0 | 0 | 0 | 2 |
| <u>SUMF1</u>    | 0 | 1 | 0 | 0 | 0 | 0 | 1 | 0 | 0 | 0 | 2 |
| <u>CYP4V2</u>   | 0 | 1 | 0 | 0 | 0 | 0 | 1 | 0 | 0 | 0 | 2 |
| <u>SH3PXD2B</u> | 0 | 1 | 0 | 0 | 0 | 0 | 1 | 0 | 0 | 0 | 2 |
| <u>ARL10</u>    | 0 | 1 | 0 | 0 | 0 | 0 | 1 | 0 | 0 | 0 | 2 |
| <u>RGMB</u>     | 0 | 1 | 0 | 0 | 0 | 0 | 1 | 0 | 0 | 0 | 2 |
| <u>CNPY1</u>    | 0 | 1 | 0 | 0 | 0 | 0 | 1 | 0 | 0 | 0 | 2 |
| <u>SCARA5</u>   | 0 | 1 | 0 | 0 | 0 | 0 | 1 | 0 | 0 | 0 | 2 |
| <u>ANK2</u>     | 0 | 1 | 0 | 0 | 0 | 0 | 1 | 0 | 0 | 0 | 2 |
| <u>GPX3</u>     | 0 | 1 | 0 | 0 | 0 | 0 | 1 | 0 | 0 | 0 | 2 |
| <u>GIT1</u>     | 0 | 1 | 0 | 0 | 0 | 0 | 1 | 0 | 0 | 0 | 2 |
| <u>GRIN1</u>    | 0 | 1 | 0 | 0 | 0 | 0 | 1 | 0 | 0 | 0 | 2 |
| <u>CCDC113</u>  | 0 | 1 | 0 | 0 | 0 | 0 | 1 | 0 | 0 | 0 | 2 |
| <u>C18orf55</u> | 0 | 1 | 0 | 0 | 0 | 0 | 1 | 0 | 0 | 0 | 2 |
| <u>TMEM208</u>  | 0 | 1 | 0 | 0 | 0 | 0 | 1 | 0 | 0 | 0 | 2 |
| <u>DNAJC15</u>  | 0 | 1 | 0 | 0 | 0 | 0 | 1 | 0 | 0 | 0 | 2 |
| <u>N6AMT1</u>   | 0 | 1 | 0 | 0 | 0 | 0 | 1 | 0 | 0 | 0 | 2 |
| <u>DDX25</u>    | 0 | 1 | 0 | 0 | 0 | 0 | 1 | 0 | 0 | 0 | 2 |
| <u>GRM7</u>     | 0 | 1 | 0 | 0 | 0 | 0 | 0 | 0 | 0 | 1 | 2 |
| <u>GSTA4</u>    | 0 | 1 | 0 | 0 | 0 | 0 | 1 | 0 | 0 | 0 | 2 |
| <u>GSTM3</u>    | 0 | 1 | 0 | 0 | 0 | 0 | 1 | 0 | 0 | 0 | 2 |
| <u>GTF2E2</u>   | 0 | 1 | 0 | 0 | 0 | 0 | 0 | 1 | 0 | 0 | 2 |
| <u>NCAPH2</u>   | 0 | 1 | 0 | 0 | 0 | 0 | 1 | 0 | 0 | 0 | 2 |
| <u>EEF2K</u>    | 0 | 1 | 0 | 0 | 0 | 0 | 1 | 0 | 0 | 0 | 2 |
| <u>UBIAD1</u>   | 0 | 1 | 0 | 0 | 0 | 0 | 1 | 0 | 0 | 0 | 2 |
| <u>GPR132</u>   | 0 | 1 | 0 | 0 | 0 | 0 | 1 | 0 | 0 | 0 | 2 |
| <u>TRHDE</u>    | 0 | 1 | 0 | 0 | 0 | 0 | 1 | 0 | 0 | 0 | 2 |
| <u>STRN3</u>    | 0 | 1 | 0 | 0 | 0 | 0 | 1 | 0 | 0 | 0 | 2 |





|                 |   |   |   |   |   |   |   |   |   |   |   |
|-----------------|---|---|---|---|---|---|---|---|---|---|---|
| <u>INSIG1</u>   | 0 | 1 | 0 | 0 | 0 | 0 | 0 | 0 | 0 | 1 | 2 |
| <u>JUN</u>      | 0 | 1 | 0 | 0 | 0 | 0 | 1 | 0 | 0 | 0 | 2 |
| <u>KCNA7</u>    | 0 | 1 | 0 | 0 | 0 | 0 | 1 | 0 | 0 | 0 | 2 |
| <u>MIA3</u>     | 0 | 1 | 0 | 0 | 0 | 0 | 1 | 0 | 0 | 0 | 2 |
| <u>KCND2</u>    | 0 | 1 | 0 | 0 | 0 | 0 | 1 | 0 | 0 | 0 | 2 |
| <u>MAST4</u>    | 0 | 1 | 0 | 0 | 0 | 0 | 1 | 0 | 0 | 0 | 2 |
| <u>C9orf102</u> | 0 | 1 | 0 | 0 | 0 | 0 | 1 | 0 | 0 | 0 | 2 |
| <u>KCNJ3</u>    | 0 | 1 | 0 | 0 | 0 | 0 | 1 | 0 | 0 | 0 | 2 |
| <u>ARL4D</u>    | 0 | 1 | 0 | 0 | 0 | 0 | 1 | 0 | 0 | 0 | 2 |
| <u>KDR</u>      | 0 | 1 | 0 | 0 | 0 | 0 | 1 | 0 | 0 | 0 | 2 |
| <u>KLK2</u>     | 0 | 1 | 0 | 0 | 0 | 0 | 1 | 0 | 0 | 0 | 2 |
| <u>KRT6B</u>    | 0 | 1 | 0 | 0 | 0 | 0 | 1 | 0 | 0 | 0 | 2 |
| <u>KRT12</u>    | 0 | 1 | 0 | 0 | 0 | 0 | 1 | 0 | 0 | 0 | 2 |
| <u>RHOB</u>     | 0 | 1 | 0 | 0 | 0 | 0 | 1 | 0 | 0 | 0 | 2 |
| <u>RPRML</u>    | 0 | 1 | 0 | 0 | 0 | 0 | 1 | 0 | 0 | 0 | 2 |
| <u>HES5</u>     | 0 | 1 | 0 | 0 | 0 | 0 | 1 | 0 | 0 | 0 | 2 |
| <u>KRT86</u>    | 0 | 1 | 0 | 0 | 0 | 0 | 1 | 0 | 0 | 0 | 2 |
| <u>AFF3</u>     | 0 | 1 | 0 | 0 | 0 | 0 | 0 | 0 | 0 | 1 | 2 |
| <u>LHCGR</u>    | 0 | 1 | 0 | 0 | 0 | 0 | 0 | 1 | 0 | 0 | 2 |
| <u>SHC4</u>     | 0 | 1 | 0 | 0 | 0 | 0 | 1 | 0 | 0 | 0 | 2 |
| <u>C1orf220</u> | 0 | 1 | 0 | 0 | 0 | 0 | 1 | 0 | 0 | 0 | 2 |
| <u>ARNT</u>     | 0 | 1 | 0 | 0 | 0 | 0 | 1 | 0 | 0 | 0 | 2 |
| <u>HERV-FRD</u> | 0 | 1 | 0 | 0 | 0 | 0 | 1 | 0 | 0 | 0 | 2 |
| <u>BCAM</u>     | 0 | 1 | 0 | 0 | 0 | 0 | 1 | 0 | 0 | 0 | 2 |
| <u>ARRB1</u>    | 0 | 1 | 0 | 0 | 0 | 0 | 1 | 0 | 0 | 0 | 2 |
| <u>MXD1</u>     | 0 | 1 | 0 | 0 | 0 | 0 | 1 | 0 | 0 | 0 | 2 |
| <u>SMAD9</u>    | 0 | 1 | 0 | 0 | 0 | 0 | 0 | 0 | 0 | 1 | 2 |
| <u>MAGEA11</u>  | 0 | 1 | 0 | 0 | 0 | 0 | 0 | 0 | 0 | 1 | 2 |
| <u>MAN1A1</u>   | 0 | 1 | 0 | 0 | 0 | 0 | 1 | 0 | 0 | 0 | 2 |
| <u>MANBA</u>    | 0 | 1 | 0 | 0 | 0 | 0 | 1 | 0 | 0 | 0 | 2 |
| <u>MBD1</u>     | 0 | 1 | 0 | 0 | 0 | 0 | 1 | 0 | 0 | 0 | 2 |
| <u>MCL1</u>     | 0 | 1 | 0 | 0 | 0 | 0 | 0 | 0 | 0 | 1 | 2 |
| <u>CD46</u>     | 0 | 1 | 0 | 0 | 0 | 0 | 0 | 0 | 0 | 1 | 2 |
| <u>MEF2C</u>    | 0 | 1 | 0 | 0 | 0 | 0 | 1 | 0 | 0 | 0 | 2 |
| <u>METTL1</u>   | 0 | 1 | 0 | 0 | 0 | 0 | 0 | 0 | 0 | 1 | 2 |
| <u>MLLT3</u>    | 0 | 1 | 0 | 0 | 0 | 0 | 1 | 0 | 0 | 0 | 2 |
| <u>MNT</u>      | 0 | 1 | 0 | 0 | 0 | 0 | 1 | 0 | 0 | 0 | 2 |
| <u>MPL</u>      | 0 | 1 | 0 | 0 | 0 | 0 | 1 | 0 | 0 | 0 | 2 |
| <u>MPP2</u>     | 0 | 1 | 0 | 0 | 0 | 0 | 1 | 0 | 0 | 0 | 2 |
| <u>MRE11A</u>   | 0 | 1 | 0 | 0 | 0 | 0 | 0 | 0 | 0 | 1 | 2 |
| <u>TTLL13</u>   | 0 | 1 | 0 | 0 | 0 | 0 | 1 | 0 | 0 | 0 | 2 |

|                 |   |   |   |   |   |   |   |   |   |   |   |
|-----------------|---|---|---|---|---|---|---|---|---|---|---|
| <u>BCL2L15</u>  | 0 | 1 | 0 | 0 | 0 | 0 | 1 | 0 | 0 | 0 | 2 |
| <u>C1orf186</u> | 0 | 1 | 0 | 0 | 0 | 0 | 1 | 0 | 0 | 0 | 2 |
| <u>MTCP1</u>    | 0 | 1 | 0 | 0 | 0 | 0 | 0 | 0 | 0 | 1 | 2 |
| <u>MYB</u>      | 0 | 1 | 0 | 0 | 0 | 0 | 0 | 0 | 0 | 1 | 2 |
| <u>PPP1R12B</u> | 0 | 1 | 0 | 0 | 0 | 0 | 0 | 0 | 0 | 1 | 2 |
| <u>NAP1L1</u>   | 0 | 1 | 0 | 0 | 0 | 0 | 1 | 0 | 0 | 0 | 2 |
| <u>NCAM1</u>    | 0 | 1 | 0 | 0 | 0 | 0 | 1 | 0 | 0 | 0 | 2 |
| <u>NDUFA7</u>   | 0 | 1 | 0 | 0 | 0 | 0 | 1 | 0 | 0 | 0 | 2 |
| <u>NEDD4</u>    | 0 | 1 | 0 | 0 | 0 | 0 | 1 | 0 | 0 | 0 | 2 |
| <u>NEK1</u>     | 0 | 1 | 0 | 0 | 0 | 0 | 0 | 0 | 0 | 1 | 2 |
| <u>NF1</u>      | 0 | 1 | 0 | 0 | 0 | 0 | 0 | 0 | 0 | 1 | 2 |
| <u>ATP1A2</u>   | 0 | 1 | 0 | 0 | 0 | 0 | 1 | 0 | 0 | 0 | 2 |
| <u>ACO1</u>     | 0 | 1 | 0 | 0 | 0 | 0 | 1 | 0 | 0 | 0 | 2 |
| <u>NHS</u>      | 0 | 1 | 0 | 0 | 0 | 0 | 1 | 0 | 0 | 0 | 2 |
| <u>NID1</u>     | 0 | 1 | 0 | 0 | 0 | 0 | 1 | 0 | 0 | 0 | 2 |
| <u>NNAT</u>     | 0 | 1 | 0 | 0 | 0 | 0 | 1 | 0 | 0 | 0 | 2 |
| <u>NOV</u>      | 0 | 1 | 0 | 0 | 0 | 0 | 0 | 0 | 0 | 1 | 2 |
| <u>NTRK2</u>    | 0 | 1 | 0 | 0 | 0 | 0 | 0 | 0 | 0 | 1 | 2 |
| <u>NTSR1</u>    | 0 | 1 | 0 | 0 | 0 | 0 | 1 | 0 | 0 | 0 | 2 |
| <u>ATP2B4</u>   | 0 | 1 | 0 | 0 | 0 | 0 | 0 | 0 | 0 | 1 | 2 |
| <u>OAS2</u>     | 0 | 1 | 0 | 0 | 0 | 0 | 1 | 0 | 0 | 0 | 2 |
| <u>ODC1</u>     | 0 | 1 | 0 | 0 | 0 | 0 | 0 | 0 | 1 | 0 | 2 |
| <u>ATP4B</u>    | 0 | 1 | 0 | 0 | 0 | 0 | 1 | 0 | 0 | 0 | 2 |
| <u>OXCT1</u>    | 0 | 1 | 0 | 0 | 0 | 0 | 1 | 0 | 0 | 0 | 2 |
| <u>P2RX7</u>    | 0 | 1 | 0 | 0 | 0 | 0 | 1 | 0 | 0 | 0 | 2 |
| <u>NOX4</u>     | 0 | 1 | 0 | 0 | 0 | 0 | 1 | 0 | 0 | 0 | 2 |
| <u>PAFAH2</u>   | 0 | 1 | 0 | 0 | 0 | 0 | 1 | 0 | 0 | 0 | 2 |
| <u>WDR42A</u>   | 0 | 1 | 0 | 0 | 0 | 0 | 1 | 0 | 0 | 0 | 2 |
| <u>PAX3</u>     | 0 | 1 | 0 | 0 | 0 | 0 | 1 | 0 | 0 | 0 | 2 |
| <u>MYEF2</u>    | 0 | 1 | 0 | 0 | 0 | 0 | 1 | 0 | 0 | 0 | 2 |
| <u>ISOC1</u>    | 0 | 1 | 0 | 0 | 0 | 0 | 1 | 0 | 0 | 0 | 2 |
| <u>ZBTB7B</u>   | 0 | 1 | 0 | 0 | 0 | 0 | 1 | 0 | 0 | 0 | 2 |
| <u>TNNI3K</u>   | 0 | 1 | 0 | 0 | 0 | 0 | 0 | 0 | 0 | 1 | 2 |
| <u>SEPSECS</u>  | 0 | 1 | 0 | 0 | 0 | 0 | 0 | 0 | 0 | 1 | 2 |
| <u>SIDT2</u>    | 0 | 1 | 0 | 0 | 0 | 0 | 1 | 0 | 0 | 0 | 2 |
| <u>DDX47</u>    | 0 | 1 | 0 | 0 | 0 | 0 | 1 | 0 | 0 | 0 | 2 |
| <u>DUSP13</u>   | 0 | 1 | 0 | 0 | 0 | 0 | 1 | 0 | 0 | 0 | 2 |
| <u>PCSK2</u>    | 0 | 1 | 0 | 0 | 0 | 0 | 1 | 0 | 0 | 0 | 2 |
| <u>BET1L</u>    | 0 | 1 | 0 | 0 | 0 | 0 | 1 | 0 | 0 | 0 | 2 |
| <u>RSRC1</u>    | 0 | 1 | 0 | 0 | 0 | 0 | 1 | 0 | 0 | 0 | 2 |
| <u>SPTBN5</u>   | 0 | 1 | 0 | 0 | 0 | 0 | 1 | 0 | 0 | 0 | 2 |



|                  |   |   |   |   |   |   |   |   |   |   |   |
|------------------|---|---|---|---|---|---|---|---|---|---|---|
| <u>C11orf59</u>  | 0 | 1 | 0 | 0 | 0 | 0 | 1 | 0 | 0 | 0 | 2 |
| <u>FAM118A</u>   | 0 | 1 | 0 | 0 | 0 | 0 | 0 | 0 | 0 | 1 | 2 |
| <u>STX17</u>     | 0 | 1 | 0 | 0 | 0 | 0 | 1 | 0 | 0 | 0 | 2 |
| <u>C17orf80</u>  | 0 | 1 | 0 | 0 | 0 | 0 | 1 | 0 | 0 | 0 | 2 |
| <u>SUSD4</u>     | 0 | 1 | 0 | 0 | 0 | 0 | 1 | 0 | 0 | 0 | 2 |
| <u>ATP5SL</u>    | 0 | 1 | 0 | 0 | 0 | 0 | 1 | 0 | 0 | 0 | 2 |
| <u>FAM90A1</u>   | 0 | 1 | 0 | 0 | 0 | 0 | 1 | 0 | 0 | 0 | 2 |
| <u>ANKZF1</u>    | 0 | 1 | 0 | 0 | 0 | 0 | 1 | 0 | 0 | 0 | 2 |
| <u>PPP2R1B</u>   | 0 | 1 | 0 | 0 | 0 | 0 | 1 | 0 | 0 | 0 | 2 |
| <u>ARL8B</u>     | 0 | 1 | 0 | 0 | 0 | 0 | 1 | 0 | 0 | 0 | 2 |
| <u>DCUN1D2</u>   | 0 | 1 | 0 | 0 | 0 | 0 | 1 | 0 | 0 | 0 | 2 |
| <u>KLHDC8A</u>   | 0 | 1 | 0 | 0 | 0 | 0 | 1 | 0 | 0 | 0 | 2 |
| <u>LRRC1</u>     | 0 | 1 | 0 | 0 | 0 | 0 | 1 | 0 | 0 | 0 | 2 |
| <u>PNMAL1</u>    | 0 | 1 | 0 | 0 | 0 | 0 | 0 | 0 | 0 | 1 | 2 |
| <u>USP40</u>     | 0 | 1 | 0 | 0 | 0 | 0 | 1 | 0 | 0 | 0 | 2 |
| <u>SMU1</u>      | 0 | 1 | 0 | 0 | 0 | 0 | 1 | 0 | 0 | 0 | 2 |
| <u>RHOT1</u>     | 0 | 1 | 0 | 0 | 0 | 0 | 1 | 0 | 0 | 0 | 2 |
| <u>CAMK2N1</u>   | 0 | 1 | 0 | 0 | 0 | 0 | 1 | 0 | 0 | 0 | 2 |
| <u>DHTKD1</u>    | 0 | 1 | 0 | 0 | 0 | 0 | 0 | 0 | 0 | 1 | 2 |
| <u>ANKRD10</u>   | 0 | 1 | 0 | 0 | 0 | 0 | 1 | 0 | 0 | 0 | 2 |
| <u>PRR5</u>      | 0 | 1 | 0 | 0 | 0 | 0 | 0 | 0 | 0 | 1 | 2 |
| <u>DEPDC1</u>    | 0 | 1 | 0 | 0 | 0 | 0 | 0 | 0 | 0 | 1 | 2 |
| <u>NOLA2</u>     | 0 | 1 | 0 | 0 | 0 | 0 | 1 | 0 | 0 | 0 | 2 |
| <u>FLJ20489</u>  | 0 | 1 | 0 | 0 | 0 | 0 | 1 | 0 | 0 | 0 | 2 |
| <u>ZNF416</u>    | 0 | 1 | 0 | 0 | 0 | 0 | 1 | 0 | 0 | 0 | 2 |
| <u>PRKACB</u>    | 0 | 1 | 0 | 0 | 0 | 0 | 0 | 0 | 0 | 1 | 2 |
| <u>JMJD2D</u>    | 0 | 1 | 0 | 0 | 0 | 0 | 1 | 0 | 0 | 0 | 2 |
| <u>FLJ10357</u>  | 0 | 1 | 0 | 0 | 0 | 0 | 1 | 0 | 0 | 0 | 2 |
| <u>POLR3B</u>    | 0 | 1 | 0 | 0 | 0 | 0 | 1 | 0 | 0 | 0 | 2 |
| <u>BTBD7</u>     | 0 | 1 | 0 | 0 | 0 | 0 | 0 | 0 | 0 | 1 | 2 |
| <u>HHAT</u>      | 0 | 1 | 0 | 0 | 0 | 0 | 0 | 0 | 0 | 1 | 2 |
| <u>C14orf108</u> | 0 | 1 | 0 | 0 | 0 | 0 | 0 | 0 | 0 | 1 | 2 |
| <u>MBD5</u>      | 0 | 1 | 0 | 0 | 0 | 0 | 0 | 0 | 0 | 1 | 2 |
| <u>PRKCB1</u>    | 0 | 1 | 0 | 0 | 0 | 0 | 1 | 0 | 0 | 0 | 2 |
| <u>CENTA2</u>    | 0 | 1 | 0 | 0 | 0 | 0 | 1 | 0 | 0 | 0 | 2 |
| <u>ZNF395</u>    | 0 | 1 | 0 | 0 | 0 | 0 | 1 | 0 | 0 | 0 | 2 |
| <u>ZNF302</u>    | 0 | 1 | 0 | 0 | 0 | 0 | 0 | 0 | 0 | 1 | 2 |
| <u>MAPK4</u>     | 0 | 1 | 0 | 0 | 0 | 0 | 1 | 0 | 0 | 0 | 2 |
| <u>GNG12</u>     | 0 | 1 | 0 | 0 | 0 | 0 | 1 | 0 | 0 | 0 | 2 |
| <u>BCAP29</u>    | 0 | 1 | 0 | 0 | 0 | 0 | 0 | 0 | 0 | 1 | 2 |
| <u>KLHL4</u>     | 0 | 1 | 0 | 0 | 0 | 0 | 1 | 0 | 0 | 0 | 2 |

|                     |   |   |   |   |   |   |   |   |   |   |   |
|---------------------|---|---|---|---|---|---|---|---|---|---|---|
| <u>PCDHB4</u>       | 0 | 1 | 0 | 0 | 0 | 0 | 1 | 0 | 0 | 0 | 2 |
| <u>PRODH</u>        | 0 | 1 | 0 | 0 | 0 | 0 | 1 | 0 | 0 | 0 | 2 |
| <u>BEX4</u>         | 0 | 1 | 0 | 0 | 0 | 0 | 0 | 0 | 0 | 1 | 2 |
| <u>PRPS2</u>        | 0 | 1 | 0 | 0 | 0 | 0 | 0 | 0 | 0 | 1 | 2 |
| <u>PSEN1</u>        | 0 | 1 | 0 | 0 | 0 | 0 | 1 | 0 | 0 | 0 | 2 |
| <u>C11orf16</u>     | 0 | 1 | 0 | 0 | 0 | 0 | 1 | 0 | 0 | 0 | 2 |
| <u>NRIP3</u>        | 0 | 1 | 0 | 0 | 0 | 0 | 1 | 0 | 0 | 0 | 2 |
| <u>SAR1A</u>        | 0 | 1 | 0 | 0 | 0 | 0 | 1 | 0 | 0 | 0 | 2 |
| <u>PSKH1</u>        | 0 | 1 | 0 | 0 | 0 | 0 | 1 | 0 | 0 | 0 | 2 |
| <u>CDC42SE1</u>     | 0 | 1 | 0 | 0 | 0 | 0 | 0 | 0 | 0 | 1 | 2 |
| <u>FSTL5</u>        | 0 | 1 | 0 | 0 | 0 | 0 | 1 | 0 | 0 | 0 | 2 |
| <u>SEMA3G</u>       | 0 | 1 | 0 | 0 | 0 | 0 | 1 | 0 | 0 | 0 | 2 |
| <u>PAK6</u>         | 0 | 1 | 0 | 0 | 0 | 0 | 0 | 0 | 0 | 1 | 2 |
| <u>CA10</u>         | 0 | 1 | 0 | 0 | 0 | 0 | 1 | 0 | 0 | 0 | 2 |
| <u>ENY2</u>         | 0 | 1 | 0 | 0 | 0 | 0 | 0 | 0 | 1 | 0 | 2 |
| <u>C5orf15</u>      | 0 | 1 | 0 | 0 | 0 | 0 | 0 | 0 | 0 | 1 | 2 |
| <u>LHX9</u>         | 0 | 1 | 0 | 0 | 0 | 0 | 1 | 0 | 0 | 0 | 2 |
| <u>SLC17A6</u>      | 0 | 1 | 0 | 0 | 0 | 0 | 0 | 0 | 1 | 0 | 2 |
| <u>AGTRAP</u>       | 0 | 1 | 0 | 0 | 0 | 0 | 1 | 0 | 0 | 0 | 2 |
| <u>C12orf4</u>      | 0 | 1 | 0 | 0 | 0 | 0 | 1 | 0 | 0 | 0 | 2 |
| <u>PDSS2</u>        | 0 | 1 | 0 | 0 | 0 | 0 | 1 | 0 | 0 | 0 | 2 |
| <u>PSMD5</u>        | 0 | 1 | 0 | 0 | 0 | 0 | 1 | 0 | 0 | 0 | 2 |
| <u>TMEM63C</u>      | 0 | 1 | 0 | 0 | 0 | 0 | 1 | 0 | 0 | 0 | 2 |
| <u>JPH2</u>         | 0 | 1 | 0 | 0 | 0 | 0 | 0 | 0 | 0 | 1 | 2 |
| <u>PSMD10</u>       | 0 | 1 | 0 | 0 | 0 | 0 | 1 | 0 | 0 | 0 | 2 |
| <u>ATP10D</u>       | 0 | 1 | 0 | 0 | 0 | 0 | 1 | 0 | 0 | 0 | 2 |
| <u>PTAFR</u>        | 0 | 1 | 0 | 0 | 0 | 0 | 1 | 0 | 0 | 0 | 2 |
| <u>ZNF286A</u>      | 0 | 1 | 0 | 0 | 0 | 0 | 0 | 0 | 0 | 1 | 2 |
| <u>PTGFR</u>        | 0 | 1 | 0 | 0 | 0 | 0 | 0 | 0 | 0 | 1 | 2 |
| <u>PTGFRN</u>       | 0 | 1 | 0 | 0 | 0 | 0 | 1 | 0 | 0 | 0 | 2 |
| <u>ZNF512B</u>      | 0 | 1 | 0 | 0 | 0 | 0 | 1 | 0 | 0 | 0 | 2 |
| <u>RP13-347D8.3</u> | 0 | 1 | 0 | 0 | 0 | 0 | 1 | 0 | 0 | 0 | 2 |
| <u>AHRR</u>         | 0 | 1 | 0 | 0 | 0 | 0 | 1 | 0 | 0 | 0 | 2 |
| <u>LRFN2</u>        | 0 | 1 | 0 | 0 | 0 | 0 | 1 | 0 | 0 | 0 | 2 |
| <u>INTS2</u>        | 0 | 1 | 0 | 0 | 0 | 0 | 1 | 0 | 0 | 0 | 2 |
| <u>KIAA1303</u>     | 0 | 1 | 0 | 0 | 0 | 0 | 1 | 0 | 0 | 0 | 2 |
| <u>WDR35</u>        | 0 | 1 | 0 | 0 | 0 | 0 | 1 | 0 | 0 | 0 | 2 |
| <u>MICAL3</u>       | 0 | 1 | 0 | 0 | 0 | 0 | 1 | 0 | 0 | 0 | 2 |
| <u>NLGN2</u>        | 0 | 1 | 0 | 0 | 0 | 0 | 1 | 0 | 0 | 0 | 2 |
| <u>EP400</u>        | 0 | 1 | 0 | 0 | 0 | 0 | 1 | 0 | 0 | 0 | 2 |
| <u>ZSWIM5</u>       | 0 | 1 | 0 | 0 | 0 | 0 | 1 | 0 | 0 | 0 | 2 |

|                 |   |   |   |   |   |   |   |   |   |   |   |
|-----------------|---|---|---|---|---|---|---|---|---|---|---|
| <u>MYH7B</u>    | 0 | 1 | 0 | 0 | 0 | 0 | 1 | 0 | 0 | 0 | 2 |
| <u>USP28</u>    | 0 | 1 | 0 | 0 | 0 | 0 | 0 | 0 | 1 | 0 | 2 |
| <u>KIAA1530</u> | 0 | 1 | 0 | 0 | 0 | 0 | 1 | 0 | 0 | 0 | 2 |
| <u>EPB41L5</u>  | 0 | 1 | 0 | 0 | 0 | 0 | 1 | 0 | 0 | 0 | 2 |
| <u>MIER1</u>    | 0 | 1 | 0 | 0 | 0 | 0 | 0 | 0 | 0 | 1 | 2 |
| <u>MIER1</u>    | 0 | 1 | 0 | 0 | 0 | 0 | 0 | 0 | 0 | 1 | 2 |
| <u>KIAA1622</u> | 0 | 1 | 0 | 0 | 0 | 0 | 0 | 0 | 0 | 1 | 2 |
| <u>KIAA1627</u> | 0 | 1 | 0 | 0 | 0 | 0 | 1 | 0 | 0 | 0 | 2 |
| <u>CADM3</u>    | 0 | 1 | 0 | 0 | 0 | 0 | 1 | 0 | 0 | 0 | 2 |
| <u>SLC46A2</u>  | 0 | 1 | 0 | 0 | 0 | 0 | 1 | 0 | 0 | 0 | 2 |
| <u>PTPRJ</u>    | 0 | 1 | 0 | 0 | 0 | 0 | 1 | 0 | 0 | 0 | 2 |
| <u>PTPRN2</u>   | 0 | 1 | 0 | 0 | 0 | 0 | 0 | 0 | 0 | 1 | 2 |
| <u>PTX3</u>     | 0 | 1 | 0 | 0 | 0 | 0 | 1 | 0 | 0 | 0 | 2 |
| <u>PYGB</u>     | 0 | 1 | 0 | 0 | 0 | 0 | 1 | 0 | 0 | 0 | 2 |
| <u>ZNF71</u>    | 0 | 1 | 0 | 0 | 0 | 0 | 1 | 0 | 0 | 0 | 2 |
| <u>C9orf80</u>  | 0 | 1 | 0 | 0 | 0 | 0 | 1 | 0 | 0 | 0 | 2 |
| <u>PRUNE</u>    | 0 | 1 | 0 | 0 | 0 | 0 | 0 | 0 | 0 | 1 | 2 |
| <u>RAB6A</u>    | 0 | 1 | 0 | 0 | 0 | 0 | 0 | 0 | 0 | 1 | 2 |
| <u>RAD17</u>    | 0 | 1 | 0 | 0 | 0 | 0 | 0 | 0 | 0 | 1 | 2 |
| <u>RFX3</u>     | 0 | 1 | 0 | 0 | 0 | 0 | 1 | 0 | 0 | 0 | 2 |
| <u>AFAP1</u>    | 0 | 1 | 0 | 0 | 0 | 0 | 0 | 0 | 0 | 1 | 2 |
| <u>EDA2R</u>    | 0 | 1 | 0 | 0 | 0 | 0 | 1 | 0 | 0 | 0 | 2 |
| <u>ELOVL5</u>   | 0 | 1 | 0 | 0 | 0 | 0 | 1 | 0 | 0 | 0 | 2 |
| <u>RIC8A</u>    | 0 | 1 | 0 | 0 | 0 | 0 | 1 | 0 | 0 | 0 | 2 |
| <u>C4orf41</u>  | 0 | 1 | 0 | 0 | 0 | 0 | 1 | 0 | 0 | 0 | 2 |
| <u>CTXN3</u>    | 0 | 1 | 0 | 0 | 0 | 0 | 0 | 0 | 0 | 1 | 2 |
| <u>RXRA</u>     | 0 | 1 | 0 | 0 | 0 | 0 | 1 | 0 | 0 | 0 | 2 |
| <u>SCN1A</u>    | 0 | 1 | 0 | 0 | 0 | 0 | 1 | 0 | 0 | 0 | 2 |
| <u>SCN3A</u>    | 0 | 1 | 0 | 0 | 0 | 0 | 1 | 0 | 0 | 0 | 2 |
| <u>SDC4</u>     | 0 | 1 | 0 | 0 | 0 | 0 | 0 | 0 | 0 | 1 | 2 |
| <u>SDCBP</u>    | 0 | 1 | 0 | 0 | 0 | 0 | 0 | 0 | 0 | 1 | 2 |
| <u>MRPL17</u>   | 0 | 1 | 0 | 0 | 0 | 0 | 0 | 0 | 0 | 1 | 2 |
| <u>UBE2O</u>    | 0 | 1 | 0 | 0 | 0 | 0 | 1 | 0 | 0 | 0 | 2 |
| <u>GOLPH3</u>   | 0 | 1 | 0 | 0 | 0 | 0 | 0 | 0 | 1 | 0 | 2 |
| <u>CLSTN2</u>   | 0 | 1 | 0 | 0 | 0 | 0 | 1 | 0 | 0 | 0 | 2 |
| <u>PJA1</u>     | 0 | 1 | 0 | 0 | 0 | 0 | 1 | 0 | 0 | 0 | 2 |
| <u>TOR3A</u>    | 0 | 1 | 0 | 0 | 0 | 0 | 1 | 0 | 0 | 0 | 2 |
| <u>NOC3L</u>    | 0 | 1 | 0 | 0 | 0 | 0 | 1 | 0 | 0 | 0 | 2 |
| <u>NSD1</u>     | 0 | 1 | 0 | 0 | 0 | 0 | 0 | 0 | 0 | 1 | 2 |
| <u>KIAA0754</u> | 0 | 1 | 0 | 0 | 0 | 0 | 1 | 0 | 0 | 0 | 2 |
| <u>IKZF4</u>    | 0 | 1 | 0 | 0 | 0 | 0 | 1 | 0 | 0 | 0 | 2 |

|                |   |   |   |   |   |   |   |   |   |   |   |
|----------------|---|---|---|---|---|---|---|---|---|---|---|
| <u>DCLRE1C</u> | 0 | 1 | 0 | 0 | 0 | 0 | 0 | 0 | 0 | 1 | 2 |
| <u>SGCD</u>    | 0 | 1 | 0 | 0 | 0 | 0 | 0 | 0 | 0 | 1 | 2 |
| <u>SGCD</u>    | 0 | 1 | 0 | 0 | 0 | 0 | 0 | 0 | 0 | 1 | 2 |
| <u>SGSH</u>    | 0 | 1 | 0 | 0 | 0 | 0 | 1 | 0 | 0 | 0 | 2 |
| <u>GORASP1</u> | 0 | 1 | 0 | 0 | 0 | 0 | 1 | 0 | 0 | 0 | 2 |
| <u>UNQ338</u>  | 0 | 1 | 0 | 0 | 0 | 0 | 1 | 0 | 0 | 0 | 2 |
| <u>SHMT1</u>   | 0 | 1 | 0 | 0 | 0 | 0 | 1 | 0 | 0 | 0 | 2 |
| <u>MFSD1</u>   | 0 | 1 | 0 | 0 | 0 | 0 | 0 | 0 | 0 | 1 | 2 |
| <u>MOSC1</u>   | 0 | 1 | 0 | 0 | 0 | 0 | 1 | 0 | 0 | 0 | 2 |
| <u>ISG20L1</u> | 0 | 1 | 0 | 0 | 0 | 0 | 1 | 0 | 0 | 0 | 2 |
| <u>IQCH</u>    | 0 | 1 | 0 | 0 | 0 | 0 | 0 | 0 | 0 | 1 | 2 |
| <u>PLEKHG2</u> | 0 | 1 | 0 | 0 | 0 | 0 | 1 | 0 | 0 | 0 | 2 |
| <u>BMP1</u>    | 0 | 1 | 0 | 0 | 0 | 0 | 1 | 0 | 0 | 0 | 2 |
| <u>MRPL38</u>  | 0 | 1 | 0 | 0 | 0 | 0 | 1 | 0 | 0 | 0 | 2 |
| <u>SLC1A3</u>  | 0 | 1 | 0 | 0 | 0 | 0 | 1 | 0 | 0 | 0 | 2 |
| <u>SLC1A4</u>  | 0 | 1 | 0 | 0 | 0 | 0 | 1 | 0 | 0 | 0 | 2 |
| <u>INTS3</u>   | 0 | 1 | 0 | 0 | 0 | 0 | 1 | 0 | 0 | 0 | 2 |
| <u>SPATS2</u>  | 0 | 1 | 0 | 0 | 0 | 0 | 1 | 0 | 0 | 0 | 2 |
| <u>UBE2Z</u>   | 0 | 1 | 0 | 0 | 0 | 0 | 1 | 0 | 0 | 0 | 2 |
| <u>SLC6A6</u>  | 0 | 1 | 0 | 0 | 0 | 0 | 0 | 0 | 0 | 1 | 2 |
| <u>SLC8A3</u>  | 0 | 1 | 0 | 0 | 0 | 0 | 1 | 0 | 0 | 0 | 2 |
| <u>SLC9A1</u>  | 0 | 1 | 0 | 0 | 0 | 0 | 1 | 0 | 0 | 0 | 2 |
| <u>SLC12A2</u> | 0 | 1 | 0 | 0 | 0 | 0 | 1 | 0 | 0 | 0 | 2 |
| <u>SLC14A1</u> | 0 | 1 | 0 | 0 | 0 | 0 | 0 | 0 | 0 | 1 | 2 |
| <u>SLC20A1</u> | 0 | 1 | 0 | 0 | 0 | 0 | 1 | 0 | 0 | 0 | 2 |
| <u>SLC22A5</u> | 0 | 1 | 0 | 0 | 0 | 0 | 1 | 0 | 0 | 0 | 2 |
| <u>SMARCA2</u> | 0 | 1 | 0 | 0 | 0 | 0 | 1 | 0 | 0 | 0 | 2 |
| <u>ZNF747</u>  | 0 | 1 | 0 | 0 | 0 | 0 | 1 | 0 | 0 | 0 | 2 |
| <u>DLK2</u>    | 0 | 1 | 0 | 0 | 0 | 0 | 0 | 0 | 0 | 1 | 2 |
| <u>SNCA</u>    | 0 | 1 | 0 | 0 | 0 | 0 | 0 | 0 | 0 | 1 | 2 |
| <u>BNIP2</u>   | 0 | 1 | 0 | 0 | 0 | 0 | 1 | 0 | 0 | 0 | 2 |
| <u>SNRPE</u>   | 0 | 1 | 0 | 0 | 0 | 0 | 1 | 0 | 0 | 0 | 2 |
| <u>SPP2</u>    | 0 | 1 | 0 | 0 | 0 | 0 | 1 | 0 | 0 | 0 | 2 |
| <u>SPRR1B</u>  | 0 | 1 | 0 | 0 | 0 | 0 | 1 | 0 | 0 | 0 | 2 |
| <u>SPTA1</u>   | 0 | 1 | 0 | 0 | 0 | 0 | 1 | 0 | 0 | 0 | 2 |
| <u>BRCA1</u>   | 0 | 1 | 0 | 0 | 0 | 0 | 0 | 0 | 0 | 1 | 2 |
| <u>BRCA1</u>   | 0 | 1 | 0 | 0 | 0 | 0 | 0 | 0 | 0 | 1 | 2 |
| <u>SRPR</u>    | 0 | 1 | 0 | 0 | 0 | 0 | 1 | 0 | 0 | 0 | 2 |
| <u>TROVE2</u>  | 0 | 1 | 0 | 0 | 0 | 0 | 0 | 0 | 1 | 0 | 2 |
| <u>STAT1</u>   | 0 | 1 | 0 | 0 | 0 | 0 | 0 | 0 | 0 | 1 | 2 |
| <u>STX3</u>    | 0 | 1 | 0 | 0 | 0 | 0 | 1 | 0 | 0 | 0 | 2 |





|                 |   |   |   |   |   |   |   |   |   |   |   |
|-----------------|---|---|---|---|---|---|---|---|---|---|---|
| <u>CACNA1C</u>  | 0 | 1 | 0 | 0 | 0 | 0 | 0 | 0 | 0 | 1 | 2 |
| <u>ZNF223</u>   | 0 | 1 | 0 | 0 | 0 | 0 | 1 | 0 | 0 | 0 | 2 |
| <u>MAPKAPK3</u> | 0 | 1 | 0 | 0 | 0 | 0 | 1 | 0 | 0 | 0 | 2 |
| <u>PRRG3</u>    | 0 | 1 | 0 | 0 | 0 | 0 | 1 | 0 | 0 | 0 | 2 |
| <u>IRX1</u>     | 0 | 1 | 0 | 0 | 0 | 0 | 1 | 0 | 0 | 0 | 2 |
| <u>C16orf53</u> | 0 | 1 | 0 | 0 | 0 | 0 | 1 | 0 | 0 | 0 | 2 |
| <u>C10orf76</u> | 0 | 1 | 0 | 0 | 0 | 0 | 1 | 0 | 0 | 0 | 2 |
| <u>C6orf211</u> | 0 | 1 | 0 | 0 | 0 | 0 | 1 | 0 | 0 | 0 | 2 |
| <u>SCRN3</u>    | 0 | 1 | 0 | 0 | 0 | 0 | 1 | 0 | 0 | 0 | 2 |
| <u>ARHGAP10</u> | 0 | 1 | 0 | 0 | 0 | 0 | 1 | 0 | 0 | 0 | 2 |
| <u>FN3KRP</u>   | 0 | 1 | 0 | 0 | 0 | 0 | 1 | 0 | 0 | 0 | 2 |
| <u>QTRTD1</u>   | 0 | 1 | 0 | 0 | 0 | 0 | 1 | 0 | 0 | 0 | 2 |
| <u>GALNT12</u>  | 0 | 1 | 0 | 0 | 0 | 0 | 0 | 0 | 0 | 1 | 2 |
| <u>ZMAT4</u>    | 0 | 1 | 0 | 0 | 0 | 0 | 1 | 0 | 0 | 0 | 2 |
| <u>C12orf49</u> | 0 | 1 | 0 | 0 | 0 | 0 | 1 | 0 | 0 | 0 | 2 |
| <u>ST7</u>      | 0 | 1 | 0 | 0 | 0 | 0 | 1 | 0 | 0 | 0 | 2 |
| <u>LONRF3</u>   | 0 | 1 | 0 | 0 | 0 | 0 | 1 | 0 | 0 | 0 | 2 |
| <u>SNX22</u>    | 0 | 1 | 0 | 0 | 0 | 0 | 1 | 0 | 0 | 0 | 2 |
| <u>CXorf45</u>  | 0 | 1 | 0 | 0 | 0 | 0 | 0 | 0 | 0 | 1 | 2 |
| <u>UBA5</u>     | 0 | 1 | 0 | 0 | 0 | 0 | 0 | 0 | 0 | 1 | 2 |
| <u>MRM1</u>     | 0 | 1 | 0 | 0 | 0 | 0 | 1 | 0 | 0 | 0 | 2 |
| <u>GRRP1</u>    | 0 | 1 | 0 | 0 | 0 | 0 | 1 | 0 | 0 | 0 | 2 |
| <u>MAP6D1</u>   | 0 | 1 | 0 | 0 | 0 | 0 | 1 | 0 | 0 | 0 | 2 |
| <u>PHF17</u>    | 0 | 1 | 0 | 0 | 0 | 0 | 1 | 0 | 0 | 0 | 2 |
| <u>GRHL2</u>    | 0 | 1 | 0 | 0 | 0 | 0 | 1 | 0 | 0 | 0 | 2 |
| <u>DSN1</u>     | 0 | 1 | 0 | 0 | 0 | 0 | 1 | 0 | 0 | 0 | 2 |
| <u>RBM35B</u>   | 0 | 1 | 0 | 0 | 0 | 0 | 1 | 0 | 0 | 0 | 2 |
| <u>GLRA3</u>    | 0 | 1 | 0 | 0 | 0 | 0 | 1 | 0 | 0 | 0 | 2 |
| <u>LRRTM4</u>   | 0 | 1 | 0 | 0 | 0 | 0 | 1 | 0 | 0 | 0 | 2 |
| <u>FRAS1</u>    | 0 | 1 | 0 | 0 | 0 | 0 | 1 | 0 | 0 | 0 | 2 |
| <u>FBXO11</u>   | 0 | 1 | 0 | 0 | 0 | 0 | 0 | 0 | 0 | 1 | 2 |
| <u>CXorf21</u>  | 0 | 1 | 0 | 0 | 0 | 0 | 1 | 0 | 0 | 0 | 2 |
| <u>ZNF430</u>   | 0 | 1 | 0 | 0 | 0 | 0 | 1 | 0 | 0 | 0 | 2 |
| <u>CCDC68</u>   | 0 | 1 | 0 | 0 | 0 | 0 | 1 | 0 | 0 | 0 | 2 |
| <u>THUMPD2</u>  | 0 | 1 | 0 | 0 | 0 | 0 | 1 | 0 | 0 | 0 | 2 |
| <u>MLL2</u>     | 0 | 1 | 0 | 0 | 0 | 0 | 1 | 0 | 0 | 0 | 2 |
| <u>APOLD1</u>   | 0 | 1 | 0 | 0 | 0 | 0 | 0 | 0 | 0 | 1 | 2 |
| <u>URM1</u>     | 0 | 1 | 0 | 0 | 0 | 0 | 1 | 0 | 0 | 0 | 2 |
| <u>PVRL4</u>    | 0 | 1 | 0 | 0 | 0 | 0 | 1 | 0 | 0 | 0 | 2 |
| <u>NIPA2</u>    | 0 | 1 | 0 | 0 | 0 | 0 | 0 | 0 | 0 | 1 | 2 |
| <u>LOC81691</u> | 0 | 1 | 0 | 0 | 0 | 0 | 1 | 0 | 0 | 0 | 2 |

|                 |   |   |   |   |   |   |   |   |   |   |   |
|-----------------|---|---|---|---|---|---|---|---|---|---|---|
| <u>PPP1R14C</u> | 0 | 1 | 0 | 0 | 0 | 0 | 1 | 0 | 0 | 0 | 2 |
| <u>NUAK2</u>    | 0 | 1 | 0 | 0 | 0 | 0 | 1 | 0 | 0 | 0 | 2 |
| <u>TLR10</u>    | 0 | 1 | 0 | 0 | 0 | 0 | 0 | 0 | 0 | 1 | 2 |
| <u>SPACA1</u>   | 0 | 1 | 0 | 0 | 0 | 0 | 1 | 0 | 0 | 0 | 2 |
| <u>RAB1B</u>    | 0 | 1 | 0 | 0 | 0 | 0 | 1 | 0 | 0 | 0 | 2 |
| <u>CANX</u>     | 0 | 1 | 0 | 0 | 0 | 0 | 0 | 0 | 0 | 1 | 2 |
| <u>FCRL4</u>    | 0 | 1 | 0 | 0 | 0 | 0 | 1 | 0 | 0 | 0 | 2 |
| <u>PLVAP</u>    | 0 | 1 | 0 | 0 | 0 | 0 | 1 | 0 | 0 | 0 | 2 |
| <u>UCK1</u>     | 0 | 1 | 0 | 0 | 0 | 0 | 1 | 0 | 0 | 0 | 2 |
| <u>AKR1CL2</u>  | 0 | 1 | 0 | 0 | 0 | 0 | 1 | 0 | 0 | 0 | 2 |
| <u>C22orf13</u> | 0 | 1 | 0 | 0 | 0 | 0 | 1 | 0 | 0 | 0 | 2 |
| <u>CALN1</u>    | 0 | 1 | 0 | 0 | 0 | 0 | 0 | 0 | 0 | 1 | 2 |
| <u>FAM57B</u>   | 0 | 1 | 0 | 0 | 0 | 0 | 1 | 0 | 0 | 0 | 2 |
| <u>STARD3NL</u> | 0 | 1 | 0 | 0 | 0 | 0 | 0 | 0 | 0 | 1 | 2 |
| <u>EIF2A</u>    | 0 | 1 | 0 | 0 | 0 | 0 | 1 | 0 | 0 | 0 | 2 |
| <u>CASP7</u>    | 0 | 1 | 0 | 0 | 0 | 0 | 1 | 0 | 0 | 0 | 2 |
| <u>ZRANB3</u>   | 0 | 1 | 0 | 0 | 0 | 0 | 0 | 1 | 0 | 0 | 2 |
| <u>FBXO30</u>   | 0 | 1 | 0 | 0 | 0 | 0 | 1 | 0 | 0 | 0 | 2 |
| <u>BCAR3</u>    | 0 | 1 | 0 | 0 | 0 | 0 | 0 | 0 | 0 | 1 | 2 |
| <u>CHD6</u>     | 0 | 1 | 0 | 0 | 0 | 0 | 1 | 0 | 0 | 0 | 2 |
| <u>BBOX1</u>    | 0 | 1 | 0 | 0 | 0 | 0 | 1 | 0 | 0 | 0 | 2 |
| <u>SGIP1</u>    | 0 | 1 | 0 | 0 | 0 | 0 | 1 | 0 | 0 | 0 | 2 |
| <u>WBSCR18</u>  | 0 | 1 | 0 | 0 | 0 | 0 | 1 | 0 | 0 | 0 | 2 |
| <u>PHF6</u>     | 0 | 1 | 0 | 0 | 0 | 0 | 0 | 1 | 0 | 0 | 2 |
| <u>TMEM107</u>  | 0 | 1 | 0 | 0 | 0 | 0 | 1 | 0 | 0 | 0 | 2 |
| <u>C3orf26</u>  | 0 | 1 | 0 | 0 | 0 | 0 | 1 | 0 | 0 | 0 | 2 |
| <u>HVCN1</u>    | 0 | 1 | 0 | 0 | 0 | 0 | 0 | 0 | 0 | 1 | 2 |
| <u>SDPR</u>     | 0 | 1 | 0 | 0 | 0 | 0 | 1 | 0 | 0 | 0 | 2 |
| <u>DOC2A</u>    | 0 | 1 | 0 | 0 | 0 | 0 | 1 | 0 | 0 | 0 | 2 |
| <u>CUL4A</u>    | 0 | 1 | 0 | 0 | 0 | 0 | 0 | 0 | 0 | 1 | 2 |
| <u>MRPL43</u>   | 0 | 1 | 0 | 0 | 0 | 0 | 1 | 0 | 0 | 0 | 2 |
| <u>C6orf168</u> | 0 | 1 | 0 | 0 | 0 | 0 | 0 | 0 | 0 | 1 | 2 |
| <u>DPY30</u>    | 0 | 1 | 0 | 0 | 0 | 0 | 1 | 0 | 0 | 0 | 2 |
| <u>MYPN</u>     | 0 | 1 | 0 | 0 | 0 | 0 | 0 | 1 | 0 | 0 | 2 |
| <u>FBXL10</u>   | 0 | 1 | 0 | 0 | 0 | 0 | 0 | 0 | 1 | 0 | 2 |
| <u>FKBP6</u>    | 0 | 1 | 0 | 0 | 0 | 0 | 1 | 0 | 0 | 0 | 2 |
| <u>NYD-SP21</u> | 0 | 1 | 0 | 0 | 0 | 0 | 1 | 0 | 0 | 0 | 2 |
| <u>UNC119B</u>  | 0 | 1 | 0 | 0 | 0 | 0 | 1 | 0 | 0 | 0 | 2 |
| <u>FUT10</u>    | 0 | 1 | 0 | 0 | 0 | 0 | 1 | 0 | 0 | 0 | 2 |
| <u>MGC4655</u>  | 0 | 1 | 0 | 0 | 0 | 0 | 1 | 0 | 0 | 0 | 2 |
| <u>ZNF607</u>   | 0 | 1 | 0 | 0 | 0 | 0 | 1 | 0 | 0 | 0 | 2 |

|                  |   |   |   |   |   |   |   |   |   |   |   |
|------------------|---|---|---|---|---|---|---|---|---|---|---|
| <u>AGPAT9</u>    | 0 | 1 | 0 | 0 | 0 | 0 | 1 | 0 | 0 | 0 | 2 |
| <u>CBR4</u>      | 0 | 1 | 0 | 0 | 0 | 0 | 1 | 0 | 0 | 0 | 2 |
| <u>ZSCAN10</u>   | 0 | 1 | 0 | 0 | 0 | 0 | 1 | 0 | 0 | 0 | 2 |
| <u>FIZ1</u>      | 0 | 1 | 0 | 0 | 0 | 0 | 1 | 0 | 0 | 0 | 2 |
| <u>FAM104A</u>   | 0 | 1 | 0 | 0 | 0 | 0 | 1 | 0 | 0 | 0 | 2 |
| <u>TNS4</u>      | 0 | 1 | 0 | 0 | 0 | 0 | 1 | 0 | 0 | 0 | 2 |
| <u>CGNL1</u>     | 0 | 1 | 0 | 0 | 0 | 0 | 1 | 0 | 0 | 0 | 2 |
| <u>MST150</u>    | 0 | 1 | 0 | 0 | 0 | 0 | 1 | 0 | 0 | 0 | 2 |
| <u>DGKD</u>      | 0 | 1 | 0 | 0 | 0 | 0 | 1 | 0 | 0 | 0 | 2 |
| <u>LGALS12</u>   | 0 | 1 | 0 | 0 | 0 | 0 | 1 | 0 | 0 | 0 | 2 |
| <u>BCAS1</u>     | 0 | 1 | 0 | 0 | 0 | 0 | 1 | 0 | 0 | 0 | 2 |
| <u>KIAA1754</u>  | 0 | 1 | 0 | 0 | 0 | 0 | 1 | 0 | 0 | 0 | 2 |
| <u>TSPYL5</u>    | 0 | 1 | 0 | 0 | 0 | 0 | 1 | 0 | 0 | 0 | 2 |
| <u>MKNK1</u>     | 0 | 1 | 0 | 0 | 0 | 0 | 1 | 0 | 0 | 0 | 2 |
| <u>PPAP2B</u>    | 0 | 1 | 0 | 0 | 0 | 0 | 0 | 0 | 0 | 1 | 2 |
| <u>NCOA1</u>     | 0 | 1 | 0 | 0 | 0 | 0 | 1 | 0 | 0 | 0 | 2 |
| <u>EIF3D</u>     | 0 | 1 | 0 | 0 | 0 | 0 | 1 | 0 | 0 | 0 | 2 |
| <u>VAMP4</u>     | 0 | 1 | 0 | 0 | 0 | 0 | 1 | 0 | 0 | 0 | 2 |
| <u>MYOM1</u>     | 0 | 1 | 0 | 0 | 0 | 0 | 1 | 0 | 0 | 0 | 2 |
| <u>WISP1</u>     | 0 | 1 | 0 | 0 | 0 | 0 | 0 | 0 | 0 | 1 | 2 |
| <u>CDC16</u>     | 0 | 1 | 0 | 0 | 0 | 0 | 1 | 0 | 0 | 0 | 2 |
| <u>EIF2B2</u>    | 0 | 1 | 0 | 0 | 0 | 0 | 1 | 0 | 0 | 0 | 2 |
| <u>MTMR2</u>     | 0 | 1 | 0 | 0 | 0 | 0 | 0 | 0 | 0 | 1 | 2 |
| <u>FUBP3</u>     | 0 | 1 | 0 | 0 | 0 | 0 | 1 | 0 | 0 | 0 | 2 |
| <u>SERPINB11</u> | 0 | 1 | 0 | 0 | 0 | 0 | 1 | 0 | 0 | 0 | 2 |
| <u>TPD52L3</u>   | 0 | 1 | 0 | 0 | 0 | 0 | 0 | 0 | 0 | 1 | 2 |
| <u>UBE3B</u>     | 0 | 1 | 0 | 0 | 0 | 0 | 0 | 0 | 0 | 1 | 2 |
| <u>HIP1R</u>     | 0 | 1 | 0 | 0 | 0 | 0 | 1 | 0 | 0 | 0 | 2 |
| <u>BAZ1B</u>     | 0 | 1 | 0 | 0 | 0 | 0 | 1 | 0 | 0 | 0 | 2 |
| <u>ZNF160</u>    | 0 | 1 | 0 | 0 | 0 | 0 | 0 | 0 | 0 | 1 | 2 |
| <u>MCFD2</u>     | 0 | 1 | 0 | 0 | 0 | 0 | 1 | 0 | 0 | 0 | 2 |
| <u>BMF</u>       | 0 | 1 | 0 | 0 | 0 | 0 | 0 | 0 | 0 | 1 | 2 |
| <u>ZNF605</u>    | 0 | 1 | 0 | 0 | 0 | 0 | 1 | 0 | 0 | 0 | 2 |
| <u>CCNT2</u>     | 0 | 1 | 0 | 0 | 0 | 0 | 1 | 0 | 0 | 0 | 2 |
| <u>PRC1</u>      | 0 | 1 | 0 | 0 | 0 | 0 | 1 | 0 | 0 | 0 | 2 |
| <u>N4BP2L1</u>   | 0 | 1 | 0 | 0 | 0 | 0 | 0 | 0 | 0 | 1 | 2 |
| <u>ANGPTL1</u>   | 0 | 1 | 0 | 0 | 0 | 0 | 0 | 0 | 0 | 1 | 2 |
| <u>USP8</u>      | 0 | 1 | 0 | 0 | 0 | 0 | 0 | 0 | 0 | 1 | 2 |
| <u>FMNL3</u>     | 0 | 1 | 0 | 0 | 0 | 0 | 1 | 0 | 0 | 0 | 2 |
| <u>ZNF682</u>    | 0 | 1 | 0 | 0 | 0 | 0 | 1 | 0 | 0 | 0 | 2 |
| <u>KRT75</u>     | 0 | 1 | 0 | 0 | 0 | 0 | 1 | 0 | 0 | 0 | 2 |

|                 |   |   |   |   |   |   |   |   |   |   |   |
|-----------------|---|---|---|---|---|---|---|---|---|---|---|
| <u>CD1D</u>     | 0 | 1 | 0 | 0 | 0 | 0 | 1 | 0 | 0 | 0 | 2 |
| <u>SLC16A6</u>  | 0 | 1 | 0 | 0 | 0 | 0 | 1 | 0 | 0 | 0 | 2 |
| <u>CTDP1</u>    | 0 | 1 | 0 | 0 | 0 | 0 | 1 | 0 | 0 | 0 | 2 |
| <u>PLXNA4</u>   | 0 | 1 | 0 | 0 | 0 | 0 | 0 | 0 | 0 | 1 | 2 |
| <u>COX7A2L</u>  | 0 | 1 | 0 | 0 | 0 | 0 | 1 | 0 | 0 | 0 | 2 |
| <u>FAM55C</u>   | 0 | 1 | 0 | 0 | 0 | 0 | 0 | 0 | 0 | 1 | 2 |
| <u>ZMYM4</u>    | 0 | 1 | 0 | 0 | 0 | 0 | 1 | 0 | 0 | 0 | 2 |
| <u>OXNAD1</u>   | 0 | 1 | 0 | 0 | 0 | 0 | 1 | 0 | 0 | 0 | 2 |
| <u>VAPA</u>     | 0 | 1 | 0 | 0 | 0 | 0 | 1 | 0 | 0 | 0 | 2 |
| <u>CD5L</u>     | 0 | 1 | 0 | 0 | 0 | 0 | 1 | 0 | 0 | 0 | 2 |
| <u>MAG11</u>    | 0 | 1 | 0 | 0 | 0 | 0 | 0 | 0 | 0 | 1 | 2 |
| <u>RCSD1</u>    | 0 | 1 | 0 | 0 | 0 | 0 | 1 | 0 | 0 | 0 | 2 |
| <u>TIMM50</u>   | 0 | 1 | 0 | 0 | 0 | 0 | 1 | 0 | 0 | 0 | 2 |
| <u>PIWIL1</u>   | 0 | 1 | 0 | 0 | 0 | 0 | 0 | 0 | 1 | 0 | 2 |
| <u>NT5C1B</u>   | 0 | 1 | 0 | 0 | 0 | 0 | 1 | 0 | 0 | 0 | 2 |
| <u>CNOT8</u>    | 0 | 1 | 0 | 0 | 0 | 0 | 1 | 0 | 0 | 0 | 2 |
| <u>IGSF2</u>    | 0 | 1 | 0 | 0 | 0 | 0 | 1 | 0 | 0 | 0 | 2 |
| <u>SEP15</u>    | 0 | 1 | 0 | 0 | 0 | 0 | 0 | 0 | 0 | 1 | 2 |
| <u>SEP15</u>    | 0 | 1 | 0 | 0 | 0 | 0 | 0 | 0 | 0 | 1 | 2 |
| <u>ORMDL3</u>   | 0 | 1 | 0 | 0 | 0 | 0 | 1 | 0 | 0 | 0 | 2 |
| <u>TJP2</u>     | 0 | 1 | 0 | 0 | 0 | 0 | 1 | 0 | 0 | 0 | 2 |
| <u>KCNK6</u>    | 0 | 1 | 0 | 0 | 0 | 0 | 1 | 0 | 0 | 0 | 2 |
| <u>TNFRSF8</u>  | 0 | 1 | 0 | 0 | 0 | 0 | 1 | 0 | 0 | 0 | 2 |
| <u>IL27RA</u>   | 0 | 1 | 0 | 0 | 0 | 0 | 1 | 0 | 0 | 0 | 2 |
| <u>CHST3</u>    | 0 | 1 | 0 | 0 | 0 | 0 | 1 | 0 | 0 | 0 | 2 |
| <u>ADAMTS3</u>  | 0 | 1 | 0 | 0 | 0 | 0 | 1 | 0 | 0 | 0 | 2 |
| <u>STXBP5L</u>  | 0 | 1 | 0 | 0 | 0 | 0 | 0 | 0 | 0 | 1 | 2 |
| <u>ZNF254</u>   | 0 | 1 | 0 | 0 | 0 | 0 | 1 | 0 | 0 | 0 | 2 |
| <u>GTPBP1</u>   | 0 | 1 | 0 | 0 | 0 | 0 | 1 | 0 | 0 | 0 | 2 |
| <u>GABBR2</u>   | 0 | 1 | 0 | 0 | 0 | 0 | 1 | 0 | 0 | 0 | 2 |
| <u>BRE</u>      | 0 | 1 | 0 | 0 | 0 | 0 | 1 | 0 | 0 | 0 | 2 |
| <u>CDC42BPB</u> | 0 | 1 | 0 | 0 | 0 | 0 | 0 | 0 | 1 | 0 | 2 |
| <u>SOX13</u>    | 0 | 1 | 0 | 0 | 0 | 0 | 1 | 0 | 0 | 0 | 2 |
| <u>IER2</u>     | 0 | 1 | 0 | 0 | 0 | 0 | 1 | 0 | 0 | 0 | 2 |
| <u>CD47</u>     | 0 | 1 | 0 | 0 | 0 | 0 | 0 | 0 | 0 | 1 | 2 |
| <u>MICAL2</u>   | 0 | 1 | 0 | 0 | 0 | 0 | 1 | 0 | 0 | 0 | 2 |
| <u>KIAA0430</u> | 0 | 1 | 0 | 0 | 0 | 0 | 1 | 0 | 0 | 0 | 2 |
| <u>DZIP3</u>    | 0 | 1 | 0 | 0 | 0 | 0 | 1 | 0 | 0 | 0 | 2 |
| <u>LRRC14</u>   | 0 | 1 | 0 | 0 | 0 | 0 | 1 | 0 | 0 | 0 | 2 |
| <u>VGLL4</u>    | 0 | 1 | 0 | 0 | 0 | 0 | 0 | 0 | 0 | 1 | 2 |
| <u>TTC35</u>    | 0 | 1 | 0 | 0 | 0 | 0 | 1 | 0 | 0 | 0 | 2 |

|           |   |   |   |   |   |   |   |   |   |   |   |
|-----------|---|---|---|---|---|---|---|---|---|---|---|
| VPRBP     | 0 | 1 | 0 | 0 | 0 | 0 | 1 | 0 | 0 | 0 | 2 |
| HDAC9     | 0 | 1 | 0 | 0 | 0 | 0 | 0 | 0 | 0 | 1 | 2 |
| KIAA0101  | 0 | 1 | 0 | 0 | 0 | 0 | 0 | 0 | 0 | 1 | 2 |
| ARHGAP11A | 0 | 1 | 0 | 0 | 0 | 0 | 1 | 0 | 0 | 0 | 2 |
| ZBTB39    | 0 | 1 | 0 | 0 | 0 | 0 | 1 | 0 | 0 | 0 | 2 |
| RHOBTB1   | 0 | 1 | 0 | 0 | 0 | 0 | 1 | 0 | 0 | 0 | 2 |
| UBAP2L    | 0 | 1 | 0 | 0 | 0 | 0 | 1 | 0 | 0 | 0 | 2 |
| CDC6      | 0 | 1 | 0 | 0 | 0 | 0 | 1 | 0 | 0 | 0 | 2 |
| SRGAP3    | 0 | 1 | 0 | 0 | 0 | 0 | 1 | 0 | 0 | 0 | 2 |
| CDC27     | 0 | 1 | 0 | 0 | 0 | 0 | 0 | 0 | 0 | 1 | 2 |
| NUP153    | 0 | 1 | 0 | 0 | 0 | 0 | 0 | 0 | 1 | 0 | 2 |
| PPP4R1    | 0 | 1 | 0 | 0 | 0 | 0 | 1 | 0 | 0 | 0 | 2 |
| CDH1      | 0 | 1 | 0 | 0 | 0 | 0 | 1 | 0 | 0 | 0 | 2 |
| PAK4      | 0 | 0 | 0 | 0 | 1 | 0 | 0 | 0 | 0 | 1 | 2 |
| MYBPC1    | 0 | 0 | 0 | 0 | 1 | 1 | 0 | 0 | 0 | 0 | 2 |
| WDR20     | 0 | 0 | 0 | 0 | 1 | 1 | 0 | 0 | 0 | 0 | 2 |
| ZNF169    | 0 | 0 | 0 | 0 | 0 | 0 | 1 | 0 | 0 | 1 | 2 |
| ZNF346    | 0 | 0 | 0 | 0 | 0 | 0 | 1 | 0 | 0 | 1 | 2 |
| BTBD7     | 0 | 0 | 0 | 0 | 0 | 0 | 1 | 0 | 0 | 1 | 2 |
| YWHAZ     | 0 | 0 | 0 | 0 | 0 | 0 | 1 | 0 | 0 | 1 | 2 |
| DCDC2     | 0 | 0 | 0 | 0 | 0 | 0 | 1 | 0 | 0 | 1 | 2 |
| ZNF385C   | 0 | 0 | 0 | 0 | 0 | 0 | 1 | 1 | 0 | 0 | 2 |
| HDAC9     | 0 | 0 | 0 | 0 | 0 | 0 | 1 | 0 | 0 | 1 | 2 |
| PRR5      | 0 | 0 | 0 | 0 | 0 | 0 | 1 | 0 | 0 | 1 | 2 |
| FBXL18    | 0 | 0 | 0 | 0 | 0 | 0 | 1 | 0 | 0 | 1 | 2 |
| SFRP1     | 0 | 0 | 0 | 0 | 0 | 0 | 1 | 0 | 0 | 1 | 2 |
| MPO       | 0 | 0 | 0 | 0 | 0 | 0 | 1 | 1 | 0 | 0 | 2 |
| CPM       | 0 | 0 | 0 | 0 | 0 | 0 | 1 | 1 | 0 | 0 | 2 |
| DUOX1     | 0 | 0 | 0 | 0 | 0 | 0 | 1 | 0 | 1 | 0 | 2 |
| MOBKL2C   | 0 | 0 | 0 | 0 | 0 | 0 | 1 | 1 | 0 | 0 | 2 |
| SLC26A11  | 0 | 0 | 0 | 0 | 0 | 0 | 1 | 1 | 0 | 0 | 2 |
| KIAA1279  | 0 | 0 | 0 | 0 | 0 | 0 | 1 | 0 | 0 | 1 | 2 |
| SLC1A1    | 0 | 0 | 0 | 0 | 0 | 0 | 1 | 1 | 0 | 0 | 2 |
| RNF44     | 0 | 0 | 0 | 0 | 0 | 0 | 1 | 0 | 0 | 1 | 2 |
| SLC1A5    | 0 | 0 | 0 | 0 | 0 | 0 | 1 | 0 | 0 | 1 | 2 |
| SLC6A15   | 0 | 0 | 0 | 0 | 0 | 0 | 1 | 0 | 0 | 1 | 2 |
| ZNF160    | 0 | 0 | 0 | 0 | 0 | 0 | 1 | 0 | 0 | 1 | 2 |
| SCN2A     | 0 | 0 | 0 | 0 | 0 | 0 | 1 | 0 | 0 | 1 | 2 |
| TMCO7     | 0 | 0 | 0 | 0 | 0 | 0 | 1 | 0 | 0 | 1 | 2 |
| RHOH      | 0 | 0 | 0 | 0 | 0 | 0 | 1 | 0 | 0 | 1 | 2 |
| TTC30A    | 0 | 0 | 0 | 0 | 0 | 0 | 1 | 0 | 0 | 1 | 2 |

|                 |   |   |   |   |   |   |   |   |   |   |   |
|-----------------|---|---|---|---|---|---|---|---|---|---|---|
| <u>DEDD</u>     | 0 | 0 | 0 | 0 | 0 | 0 | 1 | 0 | 1 | 0 | 2 |
| <u>ZNF498</u>   | 0 | 0 | 0 | 0 | 0 | 0 | 1 | 0 | 0 | 1 | 2 |
| <u>ZNF286A</u>  | 0 | 0 | 0 | 0 | 0 | 0 | 1 | 0 | 0 | 1 | 2 |
| <u>SMC2</u>     | 0 | 0 | 0 | 0 | 0 | 0 | 1 | 0 | 0 | 1 | 2 |
| <u>PRPS2</u>    | 0 | 0 | 0 | 0 | 0 | 0 | 1 | 0 | 0 | 1 | 2 |
| <u>FBXL17</u>   | 0 | 0 | 0 | 0 | 0 | 0 | 1 | 0 | 0 | 1 | 2 |
| <u>LSM8</u>     | 0 | 0 | 0 | 0 | 0 | 0 | 1 | 0 | 0 | 1 | 2 |
| <u>DENR</u>     | 0 | 0 | 0 | 0 | 0 | 0 | 1 | 0 | 0 | 1 | 2 |
| <u>ITGAM</u>    | 0 | 0 | 0 | 0 | 0 | 0 | 1 | 0 | 0 | 1 | 2 |
| <u>C8orf4</u>   | 0 | 0 | 0 | 0 | 0 | 0 | 1 | 0 | 0 | 1 | 2 |
| <u>CD96</u>     | 0 | 0 | 0 | 0 | 0 | 0 | 1 | 0 | 0 | 1 | 2 |
| <u>CCL7</u>     | 0 | 0 | 0 | 0 | 0 | 0 | 1 | 0 | 0 | 1 | 2 |
| <u>HVCN1</u>    | 0 | 0 | 0 | 0 | 0 | 0 | 1 | 0 | 0 | 1 | 2 |
| <u>RASL12</u>   | 0 | 0 | 0 | 0 | 0 | 0 | 1 | 1 | 0 | 0 | 2 |
| <u>LAMP3</u>    | 0 | 0 | 0 | 0 | 0 | 0 | 1 | 0 | 0 | 1 | 2 |
| <u>GPSM2</u>    | 0 | 0 | 0 | 0 | 0 | 0 | 1 | 0 | 0 | 1 | 2 |
| <u>IGSF9</u>    | 0 | 0 | 0 | 0 | 0 | 0 | 1 | 0 | 0 | 1 | 2 |
| <u>PRKACB</u>   | 0 | 0 | 0 | 0 | 0 | 0 | 1 | 0 | 0 | 1 | 2 |
| <u>VEZT</u>     | 0 | 0 | 0 | 0 | 0 | 0 | 1 | 0 | 0 | 1 | 2 |
| <u>RBPMS</u>    | 0 | 0 | 0 | 0 | 0 | 0 | 1 | 0 | 0 | 1 | 2 |
| <u>PLXNA2</u>   | 0 | 0 | 0 | 0 | 0 | 0 | 1 | 0 | 0 | 1 | 2 |
| <u>LOXL3</u>    | 0 | 0 | 0 | 0 | 0 | 0 | 1 | 0 | 1 | 0 | 2 |
| <u>SMAP2</u>    | 0 | 0 | 0 | 0 | 0 | 0 | 1 | 0 | 1 | 0 | 2 |
| <u>BMP6</u>     | 0 | 0 | 0 | 0 | 0 | 0 | 1 | 0 | 0 | 1 | 2 |
| <u>CD244</u>    | 0 | 0 | 0 | 0 | 0 | 0 | 1 | 0 | 0 | 1 | 2 |
| <u>CHRM2</u>    | 0 | 0 | 0 | 0 | 0 | 0 | 1 | 0 | 0 | 1 | 2 |
| <u>C1orf124</u> | 0 | 0 | 0 | 0 | 0 | 0 | 1 | 0 | 0 | 1 | 2 |
| <u>BEX4</u>     | 0 | 0 | 0 | 0 | 0 | 0 | 1 | 0 | 0 | 1 | 2 |
| <u>GRIN3A</u>   | 0 | 0 | 0 | 0 | 0 | 0 | 1 | 0 | 0 | 1 | 2 |
| <u>TTC18</u>    | 0 | 0 | 0 | 0 | 0 | 0 | 1 | 0 | 1 | 0 | 2 |
| <u>STON1</u>    | 0 | 0 | 0 | 0 | 0 | 0 | 1 | 1 | 0 | 0 | 2 |
| <u>TPD52L3</u>  | 0 | 0 | 0 | 0 | 0 | 0 | 1 | 0 | 0 | 1 | 2 |
| <u>FRMD6</u>    | 0 | 0 | 0 | 0 | 0 | 0 | 1 | 0 | 0 | 1 | 2 |
| <u>FAM118A</u>  | 0 | 0 | 0 | 0 | 0 | 0 | 1 | 0 | 0 | 1 | 2 |
| <u>SNX2</u>     | 0 | 0 | 0 | 0 | 0 | 0 | 1 | 0 | 1 | 0 | 2 |
| <u>LRCH1</u>    | 0 | 0 | 0 | 0 | 0 | 0 | 1 | 0 | 0 | 1 | 2 |
| <u>GJB2</u>     | 0 | 0 | 0 | 0 | 0 | 0 | 1 | 0 | 0 | 1 | 2 |
| <u>PRKAA1</u>   | 0 | 0 | 0 | 0 | 0 | 0 | 1 | 0 | 0 | 1 | 2 |
| <u>NSFL1C</u>   | 0 | 0 | 0 | 0 | 0 | 0 | 1 | 0 | 0 | 1 | 2 |
| <u>UBQLN2</u>   | 0 | 0 | 0 | 0 | 0 | 0 | 1 | 0 | 1 | 0 | 2 |
| <u>GOSR1</u>    | 0 | 0 | 0 | 0 | 0 | 0 | 1 | 0 | 0 | 1 | 2 |

|                  |   |   |   |   |   |   |   |   |   |   |   |
|------------------|---|---|---|---|---|---|---|---|---|---|---|
| <u>COPS6</u>     | 0 | 0 | 0 | 0 | 0 | 0 | 1 | 1 | 0 | 0 | 2 |
| <u>DLK2</u>      | 0 | 0 | 0 | 0 | 0 | 0 | 1 | 0 | 0 | 1 | 2 |
| <u>SLC45A4</u>   | 0 | 0 | 0 | 0 | 0 | 0 | 1 | 0 | 0 | 1 | 2 |
| <u>PLEKHA7</u>   | 0 | 0 | 0 | 0 | 0 | 0 | 1 | 0 | 0 | 1 | 2 |
| <u>TRIM67</u>    | 0 | 0 | 0 | 0 | 0 | 0 | 1 | 0 | 0 | 1 | 2 |
| <u>TLN2</u>      | 0 | 0 | 0 | 0 | 0 | 0 | 1 | 0 | 0 | 1 | 2 |
| <u>MMAB</u>      | 0 | 0 | 0 | 0 | 0 | 0 | 1 | 0 | 0 | 1 | 2 |
| <u>CDC42SE1</u>  | 0 | 0 | 0 | 0 | 0 | 0 | 1 | 0 | 0 | 1 | 2 |
| <u>ZNF187</u>    | 0 | 0 | 0 | 0 | 0 | 0 | 1 | 0 | 0 | 1 | 2 |
| <u>FDXR</u>      | 0 | 0 | 0 | 0 | 0 | 0 | 1 | 0 | 1 | 0 | 2 |
| <u>TMEM16F</u>   | 0 | 0 | 0 | 0 | 0 | 0 | 1 | 0 | 0 | 1 | 2 |
| <u>KLHL8</u>     | 0 | 0 | 0 | 0 | 0 | 0 | 1 | 0 | 0 | 1 | 2 |
| <u>SYNGR1</u>    | 0 | 0 | 0 | 0 | 0 | 0 | 1 | 1 | 0 | 0 | 2 |
| <u>PACSIN3</u>   | 0 | 0 | 0 | 0 | 0 | 0 | 1 | 0 | 0 | 1 | 2 |
| <u>CCNJL</u>     | 0 | 0 | 0 | 0 | 0 | 0 | 1 | 0 | 0 | 1 | 2 |
| <u>HNRNPU</u>    | 0 | 0 | 0 | 0 | 0 | 0 | 1 | 0 | 0 | 1 | 2 |
| <u>GLT25D2</u>   | 0 | 0 | 0 | 0 | 0 | 0 | 1 | 0 | 0 | 1 | 2 |
| <u>RALGPS1</u>   | 0 | 0 | 0 | 0 | 0 | 0 | 1 | 0 | 0 | 1 | 2 |
| <u>PLEKHF2</u>   | 0 | 0 | 0 | 0 | 0 | 0 | 1 | 0 | 0 | 1 | 2 |
| <u>ANP32E</u>    | 0 | 0 | 0 | 0 | 0 | 0 | 1 | 0 | 0 | 1 | 2 |
| <u>SCARA3</u>    | 0 | 0 | 0 | 0 | 0 | 0 | 1 | 1 | 0 | 0 | 2 |
| <u>EDG2</u>      | 0 | 0 | 0 | 0 | 0 | 0 | 1 | 0 | 0 | 1 | 2 |
| <u>COBRA1</u>    | 0 | 0 | 0 | 0 | 0 | 0 | 1 | 0 | 1 | 0 | 2 |
| <u>MGAT4B</u>    | 0 | 0 | 0 | 0 | 0 | 0 | 1 | 0 | 0 | 1 | 2 |
| <u>ANKRD57</u>   | 0 | 0 | 0 | 0 | 0 | 0 | 1 | 0 | 0 | 1 | 2 |
| <u>LATS1</u>     | 0 | 0 | 0 | 0 | 0 | 0 | 1 | 0 | 1 | 0 | 2 |
| <u>GEMIN8</u>    | 0 | 0 | 0 | 0 | 0 | 0 | 1 | 0 | 0 | 1 | 2 |
| <u>SSX3</u>      | 0 | 0 | 0 | 0 | 0 | 0 | 1 | 1 | 0 | 0 | 2 |
| <u>RAB7L1</u>    | 0 | 0 | 0 | 0 | 0 | 0 | 1 | 0 | 0 | 1 | 2 |
| <u>COX5A</u>     | 0 | 0 | 0 | 0 | 0 | 0 | 1 | 0 | 1 | 0 | 2 |
| <u>ARHGEF10L</u> | 0 | 0 | 0 | 0 | 0 | 0 | 1 | 0 | 1 | 0 | 2 |
| <u>POLR1B</u>    | 0 | 0 | 0 | 0 | 0 | 0 | 1 | 0 | 0 | 1 | 2 |
| <u>DSCR3</u>     | 0 | 0 | 0 | 0 | 0 | 0 | 1 | 0 | 0 | 1 | 2 |
| <u>ADNP2</u>     | 0 | 0 | 0 | 0 | 0 | 0 | 1 | 1 | 0 | 0 | 2 |
| <u>PPAP2B</u>    | 0 | 0 | 0 | 0 | 0 | 0 | 1 | 0 | 0 | 1 | 2 |
| <u>NTRK2</u>     | 0 | 0 | 0 | 0 | 0 | 0 | 1 | 0 | 0 | 1 | 2 |
| <u>PDZD2</u>     | 0 | 0 | 0 | 0 | 0 | 0 | 1 | 0 | 0 | 1 | 2 |
| <u>WDR32</u>     | 0 | 0 | 0 | 0 | 0 | 0 | 1 | 0 | 0 | 1 | 2 |
| <u>TMEM109</u>   | 0 | 0 | 0 | 0 | 0 | 0 | 1 | 0 | 0 | 1 | 2 |
| <u>PRIC285</u>   | 0 | 0 | 0 | 0 | 0 | 0 | 1 | 0 | 0 | 1 | 2 |
| <u>DDIT4L</u>    | 0 | 0 | 0 | 0 | 0 | 0 | 1 | 0 | 0 | 1 | 2 |

|                  |   |   |   |   |   |   |   |   |   |   |   |
|------------------|---|---|---|---|---|---|---|---|---|---|---|
| <u>SIPA1L1</u>   | 0 | 0 | 0 | 0 | 0 | 0 | 1 | 0 | 1 | 0 | 2 |
| <u>TGOLN2</u>    | 0 | 0 | 0 | 0 | 0 | 0 | 1 | 0 | 0 | 1 | 2 |
| <u>FZR1</u>      | 0 | 0 | 0 | 0 | 0 | 0 | 1 | 0 | 0 | 1 | 2 |
| <u>DIRAS1</u>    | 0 | 0 | 0 | 0 | 0 | 0 | 1 | 1 | 0 | 0 | 2 |
| <u>AHI1</u>      | 0 | 0 | 0 | 0 | 0 | 0 | 1 | 0 | 0 | 1 | 2 |
| <u>MACROD2</u>   | 0 | 0 | 0 | 0 | 0 | 0 | 1 | 0 | 0 | 1 | 2 |
| <u>ATP2C1</u>    | 0 | 0 | 0 | 0 | 0 | 0 | 1 | 0 | 0 | 1 | 2 |
| <u>MRE11A</u>    | 0 | 0 | 0 | 0 | 0 | 0 | 1 | 0 | 0 | 1 | 2 |
| <u>DNAJB2</u>    | 0 | 0 | 0 | 0 | 0 | 0 | 1 | 1 | 0 | 0 | 2 |
| <u>CPNE3</u>     | 0 | 0 | 0 | 0 | 0 | 0 | 1 | 0 | 0 | 1 | 2 |
| <u>LOC388335</u> | 0 | 0 | 0 | 0 | 0 | 0 | 1 | 0 | 0 | 1 | 2 |
| <u>NAT8L</u>     | 0 | 0 | 0 | 0 | 0 | 0 | 1 | 0 | 0 | 1 | 2 |
| <u>EGFLAM</u>    | 0 | 0 | 0 | 0 | 0 | 0 | 1 | 0 | 0 | 1 | 2 |
| <u>TMEM182</u>   | 0 | 0 | 0 | 0 | 0 | 0 | 1 | 0 | 0 | 1 | 2 |
| <u>GARNL1</u>    | 0 | 0 | 0 | 0 | 0 | 0 | 1 | 0 | 0 | 1 | 2 |
| <u>YES1</u>      | 0 | 0 | 0 | 0 | 0 | 0 | 1 | 0 | 0 | 1 | 2 |
| <u>SMC1B</u>     | 0 | 0 | 0 | 0 | 0 | 0 | 1 | 0 | 1 | 0 | 2 |
| <u>GYG1</u>      | 0 | 0 | 0 | 0 | 0 | 0 | 1 | 0 | 1 | 0 | 2 |
| <u>NR5A2</u>     | 0 | 0 | 0 | 0 | 0 | 0 | 1 | 0 | 0 | 1 | 2 |
| <u>FAM64A</u>    | 0 | 0 | 0 | 0 | 0 | 0 | 1 | 0 | 0 | 1 | 2 |
| <u>SCFD2</u>     | 0 | 0 | 0 | 0 | 0 | 0 | 1 | 0 | 0 | 1 | 2 |
| <u>ATG12</u>     | 0 | 0 | 0 | 0 | 0 | 0 | 1 | 0 | 0 | 1 | 2 |
| <u>FCHO2</u>     | 0 | 0 | 0 | 0 | 0 | 0 | 1 | 0 | 0 | 1 | 2 |
| <u>C1orf95</u>   | 0 | 0 | 0 | 0 | 0 | 0 | 1 | 0 | 0 | 1 | 2 |
| <u>MRFAP1L1</u>  | 0 | 0 | 0 | 0 | 0 | 0 | 1 | 0 | 0 | 1 | 2 |
| <u>FAM83C</u>    | 0 | 0 | 0 | 0 | 0 | 0 | 1 | 0 | 0 | 1 | 2 |
| <u>PSMD1</u>     | 0 | 0 | 0 | 0 | 0 | 0 | 1 | 0 | 1 | 0 | 2 |
| <u>CD83</u>      | 0 | 0 | 0 | 0 | 0 | 0 | 1 | 0 | 0 | 1 | 2 |
| <u>C1orf173</u>  | 0 | 0 | 0 | 0 | 0 | 0 | 1 | 0 | 0 | 1 | 2 |
| <u>ST13</u>      | 0 | 0 | 0 | 0 | 0 | 0 | 1 | 0 | 0 | 1 | 2 |
| <u>MAFG</u>      | 0 | 0 | 0 | 0 | 0 | 0 | 1 | 1 | 0 | 0 | 2 |
| <u>MTCP1</u>     | 0 | 0 | 0 | 0 | 0 | 0 | 1 | 0 | 0 | 1 | 2 |
| <u>MCHR1</u>     | 0 | 0 | 0 | 0 | 0 | 0 | 1 | 1 | 0 | 0 | 2 |
| <u>CHST1</u>     | 0 | 0 | 0 | 0 | 0 | 0 | 1 | 0 | 1 | 0 | 2 |
| <u>AQP3</u>      | 0 | 0 | 0 | 0 | 0 | 0 | 1 | 0 | 0 | 1 | 2 |
| <u>PPP1R3A</u>   | 0 | 0 | 0 | 0 | 0 | 0 | 1 | 0 | 0 | 1 | 2 |
| <u>EML1</u>      | 0 | 0 | 0 | 0 | 0 | 0 | 1 | 0 | 0 | 1 | 2 |
| <u>C1orf88</u>   | 0 | 0 | 0 | 0 | 0 | 0 | 1 | 0 | 0 | 1 | 2 |
| <u>AQR</u>       | 0 | 0 | 0 | 0 | 0 | 0 | 1 | 0 | 0 | 1 | 2 |
| <u>DCLRE1C</u>   | 0 | 0 | 0 | 0 | 0 | 0 | 1 | 0 | 0 | 1 | 2 |
| <u>RBM33</u>     | 0 | 0 | 0 | 0 | 0 | 0 | 1 | 0 | 0 | 1 | 2 |



|                 |   |   |   |   |   |   |   |   |   |   |   |
|-----------------|---|---|---|---|---|---|---|---|---|---|---|
| <u>PWWP2B</u>   | 0 | 0 | 0 | 0 | 0 | 0 | 1 | 0 | 0 | 1 | 2 |
| <u>ATP5L</u>    | 0 | 0 | 0 | 0 | 0 | 0 | 1 | 0 | 0 | 1 | 2 |
| <u>XK</u>       | 0 | 0 | 0 | 0 | 0 | 0 | 1 | 0 | 0 | 1 | 2 |
| <u>NANOS1</u>   | 0 | 0 | 0 | 0 | 0 | 0 | 1 | 0 | 0 | 1 | 2 |
| <u>RPS6KA2</u>  | 0 | 0 | 0 | 0 | 0 | 0 | 1 | 0 | 0 | 1 | 2 |
| <u>MAB21L1</u>  | 0 | 0 | 0 | 0 | 0 | 0 | 1 | 0 | 1 | 0 | 2 |
| <u>ITPK1</u>    | 0 | 0 | 0 | 0 | 0 | 0 | 1 | 0 | 0 | 1 | 2 |
| <u>WDR57</u>    | 0 | 0 | 0 | 0 | 0 | 0 | 1 | 0 | 1 | 0 | 2 |
| <u>SEPT10</u>   | 0 | 0 | 0 | 0 | 0 | 0 | 1 | 0 | 0 | 1 | 2 |
| <u>MIER1</u>    | 0 | 0 | 0 | 0 | 0 | 0 | 1 | 0 | 0 | 1 | 2 |
| <u>C2orf61</u>  | 0 | 0 | 0 | 0 | 0 | 0 | 1 | 1 | 0 | 0 | 2 |
| <u>DNA2</u>     | 0 | 0 | 0 | 0 | 0 | 0 | 1 | 0 | 0 | 1 | 2 |
| <u>DISP2</u>    | 0 | 0 | 0 | 0 | 0 | 0 | 1 | 1 | 0 | 0 | 2 |
| <u>C4orf32</u>  | 0 | 0 | 0 | 0 | 0 | 0 | 1 | 0 | 0 | 1 | 2 |
| <u>FAM83A</u>   | 0 | 0 | 0 | 0 | 0 | 0 | 1 | 1 | 0 | 0 | 2 |
| <u>ATP6V1C1</u> | 0 | 0 | 0 | 0 | 0 | 0 | 1 | 0 | 0 | 1 | 2 |
| <u>FER1L3</u>   | 0 | 0 | 0 | 0 | 0 | 0 | 1 | 0 | 0 | 1 | 2 |
| <u>FOXA3</u>    | 0 | 0 | 0 | 0 | 0 | 0 | 1 | 0 | 0 | 1 | 2 |
| <u>CUL4A</u>    | 0 | 0 | 0 | 0 | 0 | 0 | 1 | 0 | 0 | 1 | 2 |
| <u>TSPAN1</u>   | 0 | 0 | 0 | 0 | 0 | 0 | 1 | 0 | 0 | 1 | 2 |
| <u>OLIG2</u>    | 0 | 0 | 0 | 0 | 0 | 0 | 1 | 0 | 0 | 1 | 2 |
| <u>PPAPDC3</u>  | 0 | 0 | 0 | 0 | 0 | 0 | 1 | 0 | 0 | 1 | 2 |
| <u>NDRG1</u>    | 0 | 0 | 0 | 0 | 0 | 0 | 1 | 0 | 0 | 1 | 2 |
| <u>TSN</u>      | 0 | 0 | 0 | 0 | 0 | 0 | 1 | 0 | 0 | 1 | 2 |
| <u>CCDC22</u>   | 0 | 0 | 0 | 0 | 0 | 0 | 1 | 0 | 0 | 1 | 2 |
| <u>KANK2</u>    | 0 | 0 | 0 | 0 | 0 | 0 | 1 | 0 | 0 | 1 | 2 |
| <u>PLEKHG3</u>  | 0 | 0 | 0 | 0 | 0 | 0 | 1 | 0 | 0 | 1 | 2 |
| <u>C1orf34</u>  | 0 | 0 | 0 | 0 | 0 | 0 | 1 | 0 | 0 | 1 | 2 |
| <u>HSPH1</u>    | 0 | 0 | 0 | 0 | 0 | 0 | 1 | 0 | 1 | 0 | 2 |
| <u>MLXIPL</u>   | 0 | 0 | 0 | 0 | 0 | 0 | 1 | 0 | 0 | 1 | 2 |
| <u>AFF3</u>     | 0 | 0 | 0 | 0 | 0 | 0 | 1 | 0 | 0 | 1 | 2 |
| <u>DAGLA</u>    | 0 | 0 | 0 | 0 | 0 | 0 | 1 | 0 | 0 | 1 | 2 |
| <u>PPM1D</u>    | 0 | 0 | 0 | 0 | 0 | 0 | 1 | 0 | 1 | 0 | 2 |
| <u>HDLBP</u>    | 0 | 0 | 0 | 0 | 0 | 0 | 1 | 0 | 0 | 1 | 2 |
| <u>MIPOL1</u>   | 0 | 0 | 0 | 0 | 0 | 0 | 1 | 0 | 0 | 1 | 2 |
| <u>PRICKLE1</u> | 0 | 0 | 0 | 0 | 0 | 0 | 1 | 0 | 1 | 0 | 2 |
| <u>DEXI</u>     | 0 | 0 | 0 | 0 | 0 | 0 | 1 | 1 | 0 | 0 | 2 |
| <u>CXCL10</u>   | 0 | 0 | 0 | 0 | 0 | 0 | 1 | 0 | 0 | 1 | 2 |
| <u>GAD1</u>     | 0 | 0 | 0 | 0 | 0 | 0 | 1 | 0 | 0 | 1 | 2 |
| <u>CCDC47</u>   | 0 | 0 | 0 | 0 | 0 | 0 | 1 | 0 | 1 | 0 | 2 |
| <u>FAM125B</u>  | 0 | 0 | 0 | 0 | 0 | 0 | 1 | 0 | 0 | 1 | 2 |

|                  |   |   |   |   |   |   |   |   |   |   |   |
|------------------|---|---|---|---|---|---|---|---|---|---|---|
| <u>SGCD</u>      | 0 | 0 | 0 | 0 | 0 | 0 | 1 | 0 | 0 | 1 | 2 |
| <u>FGFR3</u>     | 0 | 0 | 0 | 0 | 0 | 0 | 1 | 0 | 0 | 1 | 2 |
| <u>C18orf51</u>  | 0 | 0 | 0 | 0 | 0 | 0 | 1 | 0 | 0 | 1 | 2 |
| <u>PRELP</u>     | 0 | 0 | 0 | 0 | 0 | 0 | 1 | 0 | 0 | 1 | 2 |
| <u>ZNF182</u>    | 0 | 0 | 0 | 0 | 0 | 0 | 1 | 0 | 0 | 1 | 2 |
| <u>C2orf18</u>   | 0 | 0 | 0 | 0 | 0 | 0 | 1 | 1 | 0 | 0 | 2 |
| <u>BDH2</u>      | 0 | 0 | 0 | 0 | 0 | 0 | 1 | 0 | 0 | 1 | 2 |
| <u>TLR10</u>     | 0 | 0 | 0 | 0 | 0 | 0 | 1 | 0 | 0 | 1 | 2 |
| <u>IMPA1</u>     | 0 | 0 | 0 | 0 | 0 | 0 | 1 | 0 | 0 | 1 | 2 |
| <u>BRCA1</u>     | 0 | 0 | 0 | 0 | 0 | 0 | 1 | 0 | 0 | 1 | 2 |
| <u>PLEKHG1</u>   | 0 | 0 | 0 | 0 | 0 | 0 | 1 | 0 | 0 | 1 | 2 |
| <u>ARMC7</u>     | 0 | 0 | 0 | 0 | 0 | 0 | 1 | 1 | 0 | 0 | 2 |
| <u>FAM8A1</u>    | 0 | 0 | 0 | 0 | 0 | 0 | 1 | 0 | 0 | 1 | 2 |
| <u>SLC39A8</u>   | 0 | 0 | 0 | 0 | 0 | 0 | 1 | 0 | 0 | 1 | 2 |
| <u>PDCD4</u>     | 0 | 0 | 0 | 0 | 0 | 0 | 1 | 0 | 0 | 1 | 2 |
| <u>OSBPL7</u>    | 0 | 0 | 0 | 0 | 0 | 0 | 1 | 0 | 1 | 0 | 2 |
| <u>UBE2H</u>     | 0 | 0 | 0 | 0 | 0 | 0 | 1 | 0 | 0 | 1 | 2 |
| <u>BVES</u>      | 0 | 0 | 0 | 0 | 0 | 0 | 1 | 0 | 0 | 1 | 2 |
| <u>PAK6</u>      | 0 | 0 | 0 | 0 | 0 | 0 | 1 | 0 | 0 | 1 | 2 |
| <u>CYBRD1</u>    | 0 | 0 | 0 | 0 | 0 | 0 | 1 | 0 | 0 | 1 | 2 |
| <u>TPRG1L</u>    | 0 | 0 | 0 | 0 | 0 | 0 | 1 | 0 | 0 | 1 | 2 |
| <u>AMACR</u>     | 0 | 0 | 0 | 0 | 0 | 0 | 1 | 0 | 0 | 1 | 2 |
| <u>LOC400451</u> | 0 | 0 | 0 | 0 | 0 | 0 | 1 | 0 | 0 | 1 | 2 |
| <u>TRIM58</u>    | 0 | 0 | 0 | 0 | 0 | 0 | 1 | 0 | 0 | 1 | 2 |
| <u>CCDC55</u>    | 0 | 0 | 0 | 0 | 0 | 0 | 1 | 1 | 0 | 0 | 2 |
| <u>C1orf216</u>  | 0 | 0 | 0 | 0 | 0 | 0 | 1 | 0 | 0 | 1 | 2 |
| <u>STK35</u>     | 0 | 0 | 0 | 0 | 0 | 0 | 1 | 0 | 0 | 1 | 2 |
| <u>TCF15</u>     | 0 | 0 | 0 | 0 | 0 | 0 | 1 | 0 | 0 | 1 | 2 |
| <u>KIAA0141</u>  | 0 | 0 | 0 | 0 | 0 | 0 | 1 | 1 | 0 | 0 | 2 |
| <u>HIAT1</u>     | 0 | 0 | 0 | 0 | 0 | 0 | 1 | 0 | 1 | 0 | 2 |
| <u>SAMD10</u>    | 0 | 0 | 0 | 0 | 0 | 0 | 1 | 0 | 0 | 1 | 2 |
| <u>LOC283551</u> | 0 | 0 | 0 | 0 | 0 | 0 | 1 | 0 | 0 | 1 | 2 |
| <u>PALB2</u>     | 0 | 0 | 0 | 0 | 0 | 0 | 1 | 0 | 0 | 1 | 2 |
| <u>EPB49</u>     | 0 | 0 | 0 | 0 | 0 | 0 | 1 | 0 | 0 | 1 | 2 |
| <u>GRIN2B</u>    | 0 | 0 | 0 | 0 | 0 | 0 | 1 | 1 | 0 | 0 | 2 |
| <u>OTUD5</u>     | 0 | 0 | 0 | 0 | 0 | 0 | 1 | 0 | 1 | 0 | 2 |
| <u>ZNF302</u>    | 0 | 0 | 0 | 0 | 0 | 0 | 1 | 0 | 0 | 1 | 2 |
| <u>FNDC7</u>     | 0 | 0 | 0 | 0 | 0 | 0 | 1 | 0 | 0 | 1 | 2 |
| <u>WNT1</u>      | 0 | 0 | 0 | 0 | 0 | 0 | 1 | 1 | 0 | 0 | 2 |
| <u>ST7L</u>      | 0 | 0 | 0 | 0 | 0 | 0 | 1 | 1 | 0 | 0 | 2 |
| <u>TRAPPC3</u>   | 0 | 0 | 0 | 0 | 0 | 0 | 1 | 0 | 1 | 0 | 2 |

|                 |   |   |   |   |   |   |   |   |   |   |   |
|-----------------|---|---|---|---|---|---|---|---|---|---|---|
| <u>PRELID2</u>  | 0 | 0 | 0 | 0 | 0 | 0 | 1 | 0 | 0 | 1 | 2 |
| <u>FAM63A</u>   | 0 | 0 | 0 | 0 | 0 | 0 | 1 | 0 | 0 | 1 | 2 |
| <u>CALN1</u>    | 0 | 0 | 0 | 0 | 0 | 0 | 1 | 0 | 0 | 1 | 2 |
| <u>YTHDF1</u>   | 0 | 0 | 0 | 0 | 0 | 0 | 1 | 0 | 1 | 0 | 2 |
| <u>ALOX12</u>   | 0 | 0 | 0 | 0 | 0 | 0 | 1 | 0 | 0 | 1 | 2 |
| <u>RGS4</u>     | 0 | 0 | 0 | 0 | 0 | 0 | 1 | 0 | 0 | 1 | 2 |
| <u>RIPK4</u>    | 0 | 0 | 0 | 0 | 0 | 0 | 1 | 0 | 0 | 1 | 2 |
| <u>GEMIN7</u>   | 0 | 0 | 0 | 0 | 0 | 0 | 1 | 0 | 0 | 1 | 2 |
| <u>SLC6A6</u>   | 0 | 0 | 0 | 0 | 0 | 0 | 1 | 0 | 0 | 1 | 2 |
| <u>MMP16</u>    | 0 | 0 | 0 | 0 | 0 | 0 | 1 | 0 | 0 | 1 | 2 |
| <u>KIAA0329</u> | 0 | 0 | 0 | 0 | 0 | 0 | 1 | 0 | 0 | 1 | 2 |
| <u>PPM1H</u>    | 0 | 0 | 0 | 0 | 0 | 0 | 1 | 0 | 0 | 1 | 2 |
| <u>CCL11</u>    | 0 | 0 | 0 | 0 | 0 | 0 | 1 | 1 | 0 | 0 | 2 |
| <u>DPYD</u>     | 0 | 0 | 0 | 0 | 0 | 0 | 1 | 0 | 0 | 1 | 2 |
| <u>CTXN3</u>    | 0 | 0 | 0 | 0 | 0 | 0 | 1 | 0 | 0 | 1 | 2 |
| <u>C10orf25</u> | 0 | 0 | 0 | 0 | 0 | 0 | 1 | 1 | 0 | 0 | 2 |
| <u>JOSD1</u>    | 0 | 0 | 0 | 0 | 0 | 0 | 1 | 1 | 0 | 0 | 2 |
| <u>EIF1B</u>    | 0 | 0 | 0 | 0 | 0 | 0 | 1 | 0 | 0 | 1 | 2 |
| <u>DLG2</u>     | 0 | 0 | 0 | 0 | 0 | 0 | 1 | 0 | 0 | 1 | 2 |
| <u>C6orf64</u>  | 0 | 0 | 0 | 0 | 0 | 0 | 1 | 1 | 0 | 0 | 2 |
| <u>FZD8</u>     | 0 | 0 | 0 | 0 | 0 | 0 | 1 | 0 | 1 | 0 | 2 |
| <u>DMP1</u>     | 0 | 0 | 0 | 0 | 0 | 0 | 1 | 0 | 0 | 1 | 2 |
| <u>LIAS</u>     | 0 | 0 | 0 | 0 | 0 | 0 | 1 | 0 | 1 | 0 | 2 |
| <u>PTCHD2</u>   | 0 | 0 | 0 | 0 | 0 | 0 | 1 | 1 | 0 | 0 | 2 |
| <u>POMT2</u>    | 0 | 0 | 0 | 0 | 0 | 0 | 1 | 1 | 0 | 0 | 2 |
| <u>MTFR1</u>    | 0 | 0 | 0 | 0 | 0 | 0 | 1 | 0 | 0 | 1 | 2 |
| <u>TMEM16B</u>  | 0 | 0 | 0 | 0 | 0 | 0 | 1 | 0 | 1 | 0 | 2 |
| <u>SLC25A1</u>  | 0 | 0 | 0 | 0 | 0 | 0 | 1 | 0 | 1 | 0 | 2 |
| <u>LUZP1</u>    | 0 | 0 | 0 | 0 | 0 | 0 | 1 | 0 | 0 | 1 | 2 |
| <u>PPP1R15B</u> | 0 | 0 | 0 | 0 | 0 | 0 | 1 | 0 | 0 | 1 | 2 |
| <u>FOXN4</u>    | 0 | 0 | 0 | 0 | 0 | 0 | 1 | 0 | 0 | 1 | 2 |
| <u>OLFM2</u>    | 0 | 0 | 0 | 0 | 0 | 0 | 1 | 0 | 1 | 0 | 2 |
| <u>GNGT2</u>    | 0 | 0 | 0 | 0 | 0 | 0 | 1 | 0 | 0 | 1 | 2 |
| <u>RRH</u>      | 0 | 0 | 0 | 0 | 0 | 0 | 1 | 0 | 1 | 0 | 2 |
| <u>ADRA1B</u>   | 0 | 0 | 0 | 0 | 0 | 0 | 1 | 0 | 1 | 0 | 2 |
| <u>BRD7</u>     | 0 | 0 | 0 | 0 | 0 | 0 | 1 | 0 | 1 | 0 | 2 |
| <u>QRICH1</u>   | 0 | 0 | 0 | 0 | 0 | 0 | 1 | 0 | 1 | 0 | 2 |
| <u>TSPAN2</u>   | 0 | 0 | 0 | 0 | 0 | 0 | 1 | 0 | 0 | 1 | 2 |
| <u>CHST2</u>    | 0 | 0 | 0 | 0 | 0 | 0 | 1 | 0 | 0 | 1 | 2 |
| <u>FOXJ1</u>    | 0 | 0 | 0 | 0 | 0 | 0 | 1 | 0 | 0 | 1 | 2 |
| <u>KLHL18</u>   | 0 | 0 | 0 | 0 | 0 | 0 | 1 | 0 | 0 | 1 | 2 |

|                  |   |   |   |   |   |   |   |   |   |   |   |
|------------------|---|---|---|---|---|---|---|---|---|---|---|
| <u>ATP10B</u>    | 0 | 0 | 0 | 0 | 0 | 0 | 1 | 0 | 0 | 1 | 2 |
| <u>FPGT</u>      | 0 | 0 | 0 | 0 | 0 | 0 | 1 | 0 | 0 | 1 | 2 |
| <u>GLUD1</u>     | 0 | 0 | 0 | 0 | 0 | 0 | 1 | 0 | 1 | 0 | 2 |
| <u>C3orf1</u>    | 0 | 0 | 0 | 0 | 0 | 0 | 1 | 0 | 0 | 1 | 2 |
| <u>THNSL1</u>    | 0 | 0 | 0 | 0 | 0 | 0 | 1 | 0 | 0 | 1 | 2 |
| <u>BTBD1</u>     | 0 | 0 | 0 | 0 | 0 | 0 | 1 | 0 | 0 | 1 | 2 |
| <u>BTN3A1</u>    | 0 | 0 | 0 | 0 | 0 | 0 | 1 | 1 | 0 | 0 | 2 |
| <u>C14orf24</u>  | 0 | 0 | 0 | 0 | 0 | 0 | 1 | 0 | 0 | 1 | 2 |
| <u>IKZF2</u>     | 0 | 0 | 0 | 0 | 0 | 0 | 1 | 0 | 0 | 1 | 2 |
| <u>CDC42SE2</u>  | 0 | 0 | 0 | 0 | 0 | 0 | 1 | 0 | 0 | 1 | 2 |
| <u>MID1</u>      | 0 | 0 | 0 | 0 | 0 | 0 | 1 | 0 | 0 | 1 | 2 |
| <u>NDUFS3</u>    | 0 | 0 | 0 | 0 | 0 | 0 | 1 | 0 | 1 | 0 | 2 |
| <u>ORC2L</u>     | 0 | 0 | 0 | 0 | 0 | 0 | 1 | 0 | 1 | 0 | 2 |
| <u>WDR77</u>     | 0 | 0 | 0 | 0 | 0 | 0 | 1 | 0 | 0 | 1 | 2 |
| <u>ST3GAL2</u>   | 0 | 0 | 0 | 0 | 0 | 0 | 1 | 0 | 0 | 1 | 2 |
| <u>MAGEA11</u>   | 0 | 0 | 0 | 0 | 0 | 0 | 1 | 0 | 0 | 1 | 2 |
| <u>ENPP4</u>     | 0 | 0 | 0 | 0 | 0 | 0 | 1 | 0 | 0 | 1 | 2 |
| <u>SGTA</u>      | 0 | 0 | 0 | 0 | 0 | 0 | 1 | 1 | 0 | 0 | 2 |
| <u>ABBA-1</u>    | 0 | 0 | 0 | 0 | 0 | 0 | 1 | 0 | 0 | 1 | 2 |
| <u>ATP6V1B2</u>  | 0 | 0 | 0 | 0 | 0 | 0 | 1 | 0 | 1 | 0 | 2 |
| <u>CXCL12</u>    | 0 | 0 | 0 | 0 | 0 | 0 | 1 | 0 | 0 | 1 | 2 |
| <u>ATAD1</u>     | 0 | 0 | 0 | 0 | 0 | 0 | 1 | 0 | 0 | 1 | 2 |
| <u>HSF5</u>      | 0 | 0 | 0 | 0 | 0 | 0 | 1 | 0 | 0 | 1 | 2 |
| <u>ProSAPiP1</u> | 0 | 0 | 0 | 0 | 0 | 0 | 1 | 1 | 0 | 0 | 2 |
| <u>CYP46A1</u>   | 0 | 0 | 0 | 0 | 0 | 0 | 1 | 0 | 0 | 1 | 2 |
| <u>PES1</u>      | 0 | 0 | 0 | 0 | 0 | 0 | 1 | 0 | 1 | 0 | 2 |
| <u>CORIN</u>     | 0 | 0 | 0 | 0 | 0 | 0 | 1 | 0 | 0 | 1 | 2 |
| <u>NUP210</u>    | 0 | 0 | 0 | 0 | 0 | 0 | 1 | 0 | 1 | 0 | 2 |
| <u>SRP72</u>     | 0 | 0 | 0 | 0 | 0 | 0 | 1 | 0 | 0 | 1 | 2 |
| <u>DSCR6</u>     | 0 | 0 | 0 | 0 | 0 | 0 | 1 | 0 | 0 | 1 | 2 |
| <u>ABCG4</u>     | 0 | 0 | 0 | 0 | 0 | 0 | 1 | 0 | 0 | 1 | 2 |
| <u>SHROOM2</u>   | 0 | 0 | 0 | 0 | 0 | 0 | 1 | 0 | 0 | 1 | 2 |
| <u>GPR177</u>    | 0 | 0 | 0 | 0 | 0 | 0 | 1 | 0 | 0 | 1 | 2 |
| <u>LPIN2</u>     | 0 | 0 | 0 | 0 | 0 | 0 | 1 | 0 | 0 | 1 | 2 |
| <u>RGS12</u>     | 0 | 0 | 0 | 0 | 0 | 0 | 1 | 0 | 0 | 1 | 2 |
| <u>WDR68</u>     | 0 | 0 | 0 | 0 | 0 | 0 | 1 | 0 | 0 | 1 | 2 |
| <u>B3GALT6</u>   | 0 | 0 | 0 | 0 | 0 | 0 | 1 | 0 | 0 | 1 | 2 |
| <u>UBE3B</u>     | 0 | 0 | 0 | 0 | 0 | 0 | 1 | 0 | 0 | 1 | 2 |
| <u>FYCO1</u>     | 0 | 0 | 0 | 0 | 0 | 0 | 1 | 1 | 0 | 0 | 2 |
| <u>NEDD4L</u>    | 0 | 0 | 0 | 0 | 0 | 0 | 1 | 1 | 0 | 0 | 2 |
| <u>EPB41L1</u>   | 0 | 0 | 0 | 0 | 0 | 0 | 1 | 0 | 0 | 1 | 2 |

|                    |   |   |   |   |   |   |   |   |   |   |   |
|--------------------|---|---|---|---|---|---|---|---|---|---|---|
| <u>BHLHB3</u>      | 0 | 0 | 0 | 0 | 0 | 0 | 1 | 0 | 0 | 1 | 2 |
| <u>BRD3</u>        | 0 | 0 | 0 | 0 | 0 | 0 | 1 | 0 | 1 | 0 | 2 |
| <u>PKLR</u>        | 0 | 0 | 0 | 0 | 0 | 0 | 1 | 0 | 0 | 1 | 2 |
| <u>NIPA2</u>       | 0 | 0 | 0 | 0 | 0 | 0 | 1 | 0 | 0 | 1 | 2 |
| <u>TRAF6</u>       | 0 | 0 | 0 | 0 | 0 | 0 | 1 | 0 | 0 | 1 | 2 |
| <u>EIF2S1</u>      | 0 | 0 | 0 | 0 | 0 | 0 | 1 | 0 | 0 | 1 | 2 |
| <u>RCOR3</u>       | 0 | 0 | 0 | 0 | 0 | 0 | 1 | 0 | 0 | 1 | 2 |
| <u>LHFPL4</u>      | 0 | 0 | 0 | 0 | 0 | 0 | 1 | 0 | 0 | 1 | 2 |
| <u>ENSA</u>        | 0 | 0 | 0 | 0 | 0 | 0 | 1 | 0 | 0 | 1 | 2 |
| <u>PRTFDC1</u>     | 0 | 0 | 0 | 0 | 0 | 0 | 1 | 0 | 0 | 1 | 2 |
| <u>DZIP1</u>       | 0 | 0 | 0 | 0 | 0 | 0 | 1 | 0 | 0 | 1 | 2 |
| <u>WIPF1</u>       | 0 | 0 | 0 | 0 | 0 | 0 | 1 | 0 | 0 | 1 | 2 |
| <u>GCNT1</u>       | 0 | 0 | 0 | 0 | 0 | 0 | 1 | 0 | 0 | 1 | 2 |
| <u>KIF4A</u>       | 0 | 0 | 0 | 0 | 0 | 0 | 1 | 0 | 0 | 1 | 2 |
| <u>SYT14</u>       | 0 | 0 | 0 | 0 | 0 | 0 | 1 | 0 | 1 | 0 | 2 |
| <u>HN1L</u>        | 0 | 0 | 0 | 0 | 0 | 0 | 1 | 0 | 0 | 1 | 2 |
| <u>RNF111</u>      | 0 | 0 | 0 | 0 | 0 | 0 | 1 | 0 | 0 | 1 | 2 |
| <u>MED7</u>        | 0 | 0 | 0 | 0 | 0 | 0 | 1 | 0 | 0 | 1 | 2 |
| <u>PP1L4</u>       | 0 | 0 | 0 | 0 | 0 | 0 | 1 | 0 | 0 | 1 | 2 |
| <u>LINCR</u>       | 0 | 0 | 0 | 0 | 0 | 0 | 1 | 0 | 0 | 1 | 2 |
| <u>DICER1</u>      | 0 | 0 | 0 | 0 | 0 | 0 | 1 | 0 | 0 | 1 | 2 |
| <u>RP1-21O18.1</u> | 0 | 0 | 0 | 0 | 0 | 0 | 1 | 0 | 0 | 1 | 2 |
| <u>SOX1</u>        | 0 | 0 | 0 | 0 | 0 | 0 | 1 | 0 | 0 | 1 | 2 |
| <u>SMCR7</u>       | 0 | 0 | 0 | 0 | 0 | 0 | 1 | 0 | 0 | 1 | 2 |
| <u>MS4A2</u>       | 0 | 0 | 0 | 0 | 0 | 0 | 1 | 1 | 0 | 0 | 2 |
| <u>RAF1</u>        | 0 | 0 | 0 | 0 | 0 | 0 | 1 | 0 | 1 | 0 | 2 |
| <u>TASP1</u>       | 0 | 0 | 0 | 0 | 0 | 0 | 1 | 0 | 1 | 0 | 2 |
| <u>GPR107</u>      | 0 | 0 | 0 | 0 | 0 | 0 | 1 | 0 | 0 | 1 | 2 |
| <u>CTXN1</u>       | 0 | 0 | 0 | 0 | 0 | 0 | 1 | 1 | 0 | 0 | 2 |
| <u>MTMR2</u>       | 0 | 0 | 0 | 0 | 0 | 0 | 1 | 0 | 0 | 1 | 2 |
| <u>LOC219854</u>   | 0 | 0 | 0 | 0 | 0 | 0 | 1 | 0 | 0 | 1 | 2 |
| <u>ZNF185</u>      | 0 | 0 | 0 | 0 | 0 | 0 | 1 | 1 | 0 | 0 | 2 |
| <u>CANX</u>        | 0 | 0 | 0 | 0 | 0 | 0 | 1 | 0 | 0 | 1 | 2 |
| <u>PITX1</u>       | 0 | 0 | 0 | 0 | 0 | 0 | 1 | 0 | 0 | 1 | 2 |
| <u>RG9MTD2</u>     | 0 | 0 | 0 | 0 | 0 | 0 | 1 | 0 | 0 | 1 | 2 |
| <u>MYLK</u>        | 0 | 0 | 0 | 0 | 0 | 0 | 1 | 0 | 0 | 1 | 2 |
| <u>FAM129A</u>     | 0 | 0 | 0 | 0 | 0 | 0 | 1 | 0 | 0 | 1 | 2 |
| <u>TXNDC5</u>      | 0 | 0 | 0 | 0 | 0 | 0 | 1 | 0 | 0 | 1 | 2 |
| <u>COMMD5</u>      | 0 | 0 | 0 | 0 | 0 | 0 | 1 | 1 | 0 | 0 | 2 |
| <u>MPHOSPH6</u>    | 0 | 0 | 0 | 0 | 0 | 0 | 1 | 1 | 0 | 0 | 2 |
| <u>CORO7</u>       | 0 | 0 | 0 | 0 | 0 | 0 | 1 | 0 | 1 | 0 | 2 |





|                 |   |   |   |   |   |   |   |   |   |   |   |
|-----------------|---|---|---|---|---|---|---|---|---|---|---|
| <u>ABCA5</u>    | 0 | 0 | 0 | 1 | 0 | 0 | 0 | 0 | 0 | 0 | 1 |
| <u>CBX5</u>     | 0 | 0 | 0 | 1 | 0 | 0 | 0 | 0 | 0 | 0 | 1 |
| <u>CBX5</u>     | 0 | 0 | 0 | 1 | 0 | 0 | 0 | 0 | 0 | 0 | 1 |
| <u>NTSR2</u>    | 0 | 0 | 0 | 1 | 0 | 0 | 0 | 0 | 0 | 0 | 1 |
| <u>GAB1</u>     | 0 | 0 | 0 | 1 | 0 | 0 | 0 | 0 | 0 | 0 | 1 |
| <u>EGFL6</u>    | 0 | 0 | 0 | 1 | 0 | 0 | 0 | 0 | 0 | 0 | 1 |
| <u>C12orf64</u> | 0 | 0 | 0 | 1 | 0 | 0 | 0 | 0 | 0 | 0 | 1 |
| <u>DPH3</u>     | 0 | 0 | 0 | 1 | 0 | 0 | 0 | 0 | 0 | 0 | 1 |
| <u>GPR39</u>    | 0 | 0 | 0 | 1 | 0 | 0 | 0 | 0 | 0 | 0 | 1 |
| <u>IFT81</u>    | 0 | 0 | 0 | 1 | 0 | 0 | 0 | 0 | 0 | 0 | 1 |
| <u>MRPL22</u>   | 0 | 0 | 0 | 1 | 0 | 0 | 0 | 0 | 0 | 0 | 1 |
| <u>GRM8</u>     | 0 | 0 | 0 | 1 | 0 | 0 | 0 | 0 | 0 | 0 | 1 |
| <u>GRHL1</u>    | 0 | 0 | 0 | 1 | 0 | 0 | 0 | 0 | 0 | 0 | 1 |
| <u>CCDC36</u>   | 0 | 0 | 0 | 1 | 0 | 0 | 0 | 0 | 0 | 0 | 1 |
| <u>INPP4A</u>   | 0 | 0 | 0 | 1 | 0 | 0 | 0 | 0 | 0 | 0 | 1 |
| <u>INPP4A</u>   | 0 | 0 | 0 | 1 | 0 | 0 | 0 | 0 | 0 | 0 | 1 |
| <u>FAM111B</u>  | 0 | 0 | 0 | 1 | 0 | 0 | 0 | 0 | 0 | 0 | 1 |
| <u>KCNG1</u>    | 0 | 0 | 0 | 1 | 0 | 0 | 0 | 0 | 0 | 0 | 1 |
| <u>KCNH1</u>    | 0 | 0 | 0 | 1 | 0 | 0 | 0 | 0 | 0 | 0 | 1 |
| <u>C9orf102</u> | 0 | 0 | 0 | 1 | 0 | 0 | 0 | 0 | 0 | 0 | 1 |
| <u>LAMA3</u>    | 0 | 0 | 0 | 1 | 0 | 0 | 0 | 0 | 0 | 0 | 1 |
| <u>ARHGAP6</u>  | 0 | 0 | 0 | 1 | 0 | 0 | 0 | 0 | 0 | 0 | 1 |
| <u>LMNA</u>     | 0 | 0 | 0 | 1 | 0 | 0 | 0 | 0 | 0 | 0 | 1 |
| <u>SMAD5</u>    | 0 | 0 | 0 | 1 | 0 | 0 | 0 | 0 | 0 | 0 | 1 |
| <u>MATN2</u>    | 0 | 0 | 0 | 1 | 0 | 0 | 0 | 0 | 0 | 0 | 1 |
| <u>MDM2</u>     | 0 | 0 | 0 | 1 | 0 | 0 | 0 | 0 | 0 | 0 | 1 |
| <u>MDM2</u>     | 0 | 0 | 0 | 1 | 0 | 0 | 0 | 0 | 0 | 0 | 1 |
| <u>ASPH</u>     | 0 | 0 | 0 | 1 | 0 | 0 | 0 | 0 | 0 | 0 | 1 |
| <u>MYBPC1</u>   | 0 | 0 | 0 | 1 | 0 | 0 | 0 | 0 | 0 | 0 | 1 |
| <u>NF2</u>      | 0 | 0 | 0 | 1 | 0 | 0 | 0 | 0 | 0 | 0 | 1 |
| <u>OAZ1</u>     | 0 | 0 | 0 | 1 | 0 | 0 | 0 | 0 | 0 | 0 | 1 |
| <u>PAX6</u>     | 0 | 0 | 0 | 1 | 0 | 0 | 0 | 0 | 0 | 0 | 1 |
| <u>PAX6</u>     | 0 | 0 | 0 | 1 | 0 | 0 | 0 | 0 | 0 | 0 | 1 |
| <u>PCBP2</u>    | 0 | 0 | 0 | 1 | 0 | 0 | 0 | 0 | 0 | 0 | 1 |
| <u>PCBP2</u>    | 0 | 0 | 0 | 1 | 0 | 0 | 0 | 0 | 0 | 0 | 1 |
| <u>PCBP2</u>    | 0 | 0 | 0 | 1 | 0 | 0 | 0 | 0 | 0 | 0 | 1 |
| <u>PCBP2</u>    | 0 | 0 | 0 | 1 | 0 | 0 | 0 | 0 | 0 | 0 | 1 |
| <u>PCBP2</u>    | 0 | 0 | 0 | 1 | 0 | 0 | 0 | 0 | 0 | 0 | 1 |
| <u>PCBP2</u>    | 0 | 0 | 0 | 1 | 0 | 0 | 0 | 0 | 0 | 0 | 1 |
| <u>PCBP2</u>    | 0 | 0 | 0 | 1 | 0 | 0 | 0 | 0 | 0 | 0 | 1 |
| <u>RNF12</u>    | 0 | 0 | 0 | 1 | 0 | 0 | 0 | 0 | 0 | 0 | 1 |
| <u>SERPINA1</u> | 0 | 0 | 0 | 1 | 0 | 0 | 0 | 0 | 0 | 0 | 1 |



|                 |   |   |   |   |   |   |   |   |   |   |   |
|-----------------|---|---|---|---|---|---|---|---|---|---|---|
| <u>SERPINA1</u> | 0 | 0 | 0 | 1 | 0 | 0 | 0 | 0 | 0 | 0 | 1 |
| <u>SERPINA1</u> | 0 | 0 | 0 | 1 | 0 | 0 | 0 | 0 | 0 | 0 | 1 |
| <u>SERPINA1</u> | 0 | 0 | 0 | 1 | 0 | 0 | 0 | 0 | 0 | 0 | 1 |
| <u>SERPINA1</u> | 0 | 0 | 0 | 1 | 0 | 0 | 0 | 0 | 0 | 0 | 1 |
| <u>SERPINA1</u> | 0 | 0 | 0 | 1 | 0 | 0 | 0 | 0 | 0 | 0 | 1 |
| <u>SERPINA1</u> | 0 | 0 | 0 | 1 | 0 | 0 | 0 | 0 | 0 | 0 | 1 |
| <u>SERPINA1</u> | 0 | 0 | 0 | 1 | 0 | 0 | 0 | 0 | 0 | 0 | 1 |
| <u>SERPINA1</u> | 0 | 0 | 0 | 1 | 0 | 0 | 0 | 0 | 0 | 0 | 1 |
| <u>SERPINA1</u> | 0 | 0 | 0 | 1 | 0 | 0 | 0 | 0 | 0 | 0 | 1 |
| <u>A2BP1</u>    | 0 | 0 | 0 | 1 | 0 | 0 | 0 | 0 | 0 | 0 | 1 |
| <u>WDR79</u>    | 0 | 0 | 0 | 1 | 0 | 0 | 0 | 0 | 0 | 0 | 1 |
| <u>LEPREL1</u>  | 0 | 0 | 0 | 1 | 0 | 0 | 0 | 0 | 0 | 0 | 1 |
| <u>PPP6C</u>    | 0 | 0 | 0 | 1 | 0 | 0 | 0 | 0 | 0 | 0 | 1 |
| <u>PPP6C</u>    | 0 | 0 | 0 | 1 | 0 | 0 | 0 | 0 | 0 | 0 | 1 |
| <u>JMJD1A</u>   | 0 | 0 | 0 | 1 | 0 | 0 | 0 | 0 | 0 | 0 | 1 |
| <u>MAPK9</u>    | 0 | 0 | 0 | 1 | 0 | 0 | 0 | 0 | 0 | 0 | 1 |
| <u>MAPK9</u>    | 0 | 0 | 0 | 1 | 0 | 0 | 0 | 0 | 0 | 0 | 1 |
| <u>CPA6</u>     | 0 | 0 | 0 | 1 | 0 | 0 | 0 | 0 | 0 | 0 | 1 |
| <u>C13orf1</u>  | 0 | 0 | 0 | 1 | 0 | 0 | 0 | 0 | 0 | 0 | 1 |
| <u>C8orf79</u>  | 0 | 0 | 0 | 1 | 0 | 0 | 0 | 0 | 0 | 0 | 1 |
| <u>PTPRD</u>    | 0 | 0 | 0 | 1 | 0 | 0 | 0 | 0 | 0 | 0 | 1 |
| <u>RBMS1</u>    | 0 | 0 | 0 | 1 | 0 | 0 | 0 | 0 | 0 | 0 | 1 |
| <u>RBP1</u>     | 0 | 0 | 0 | 1 | 0 | 0 | 0 | 0 | 0 | 0 | 1 |
| <u>BCL7A</u>    | 0 | 0 | 0 | 1 | 0 | 0 | 0 | 0 | 0 | 0 | 1 |
| <u>RORA</u>     | 0 | 0 | 0 | 1 | 0 | 0 | 0 | 0 | 0 | 0 | 1 |
| <u>RORA</u>     | 0 | 0 | 0 | 1 | 0 | 0 | 0 | 0 | 0 | 0 | 1 |
| <u>ATXN7</u>    | 0 | 0 | 0 | 1 | 0 | 0 | 0 | 0 | 0 | 0 | 1 |
| <u>SCP2</u>     | 0 | 0 | 0 | 1 | 0 | 0 | 0 | 0 | 0 | 0 | 1 |
| <u>SCP2</u>     | 0 | 0 | 0 | 1 | 0 | 0 | 0 | 0 | 0 | 0 | 1 |
| <u>ERAP2</u>    | 0 | 0 | 0 | 1 | 0 | 0 | 0 | 0 | 0 | 0 | 1 |
| <u>WIPF3</u>    | 0 | 0 | 0 | 1 | 0 | 0 | 0 | 0 | 0 | 0 | 1 |
| <u>CRTC3</u>    | 0 | 0 | 0 | 1 | 0 | 0 | 0 | 0 | 0 | 0 | 1 |
| <u>SLC12A3</u>  | 0 | 0 | 0 | 1 | 0 | 0 | 0 | 0 | 0 | 0 | 1 |
| <u>SLC12A3</u>  | 0 | 0 | 0 | 1 | 0 | 0 | 0 | 0 | 0 | 0 | 1 |
| <u>SLCO1A2</u>  | 0 | 0 | 0 | 1 | 0 | 0 | 0 | 0 | 0 | 0 | 1 |
| <u>TMEM108</u>  | 0 | 0 | 0 | 1 | 0 | 0 | 0 | 0 | 0 | 0 | 1 |
| <u>STAT5A</u>   | 0 | 0 | 0 | 1 | 0 | 0 | 0 | 0 | 0 | 0 | 1 |
| <u>TAF9</u>     | 0 | 0 | 0 | 1 | 0 | 0 | 0 | 0 | 0 | 0 | 1 |
| <u>TCF7L2</u>   | 0 | 0 | 0 | 1 | 0 | 0 | 0 | 0 | 0 | 0 | 1 |
| <u>TGFB2</u>    | 0 | 0 | 0 | 1 | 0 | 0 | 0 | 0 | 0 | 0 | 1 |
| <u>TIA1</u>     | 0 | 0 | 0 | 1 | 0 | 0 | 0 | 0 | 0 | 0 | 1 |





































































































|                 |   |   |   |   |   |   |   |   |   |   |   |
|-----------------|---|---|---|---|---|---|---|---|---|---|---|
| <u>PARP2</u>    | 0 | 0 | 0 | 1 | 0 | 0 | 0 | 0 | 0 | 0 | 1 |
| <u>PARP2</u>    | 0 | 0 | 0 | 1 | 0 | 0 | 0 | 0 | 0 | 0 | 1 |
| <u>PSMD14</u>   | 0 | 0 | 0 | 1 | 0 | 0 | 0 | 0 | 0 | 0 | 1 |
| <u>MRVI1</u>    | 0 | 0 | 0 | 1 | 0 | 0 | 0 | 0 | 0 | 0 | 1 |
| <u>MRVI1</u>    | 0 | 0 | 0 | 1 | 0 | 0 | 0 | 0 | 0 | 0 | 1 |
| <u>TACC2</u>    | 0 | 0 | 0 | 1 | 0 | 0 | 0 | 0 | 0 | 0 | 1 |
| <u>TACC2</u>    | 0 | 0 | 0 | 1 | 0 | 0 | 0 | 0 | 0 | 0 | 1 |
| <u>TACC2</u>    | 0 | 0 | 0 | 1 | 0 | 0 | 0 | 0 | 0 | 0 | 1 |
| <u>IL24</u>     | 0 | 0 | 0 | 1 | 0 | 0 | 0 | 0 | 0 | 0 | 1 |
| <u>MID2</u>     | 0 | 0 | 0 | 1 | 0 | 0 | 0 | 0 | 0 | 0 | 1 |
| <u>CHD3</u>     | 0 | 0 | 0 | 1 | 0 | 0 | 0 | 0 | 0 | 0 | 1 |
| <u>CHD3</u>     | 0 | 0 | 0 | 1 | 0 | 0 | 0 | 0 | 0 | 0 | 1 |
| <u>PIH1D2</u>   | 0 | 0 | 0 | 1 | 0 | 0 | 0 | 0 | 0 | 0 | 1 |
| <u>KRT40</u>    | 0 | 0 | 0 | 1 | 0 | 0 | 0 | 0 | 0 | 0 | 1 |
| <u>C18orf17</u> | 0 | 0 | 0 | 1 | 0 | 0 | 0 | 0 | 0 | 0 | 1 |
| <u>CNTN1</u>    | 0 | 0 | 0 | 1 | 0 | 0 | 0 | 0 | 0 | 0 | 1 |
| <u>CNTN1</u>    | 0 | 0 | 0 | 1 | 0 | 0 | 0 | 0 | 0 | 0 | 1 |
| <u>VCAN</u>     | 0 | 0 | 0 | 1 | 0 | 0 | 0 | 0 | 0 | 0 | 1 |
| <u>CCDC50</u>   | 0 | 0 | 0 | 1 | 0 | 0 | 0 | 0 | 0 | 0 | 1 |
| <u>RUNDC3B</u>  | 0 | 0 | 0 | 1 | 0 | 0 | 0 | 0 | 0 | 0 | 1 |
| <u>RUNDC3B</u>  | 0 | 0 | 0 | 1 | 0 | 0 | 0 | 0 | 0 | 0 | 1 |
| <u>DGKB</u>     | 0 | 0 | 0 | 1 | 0 | 0 | 0 | 0 | 0 | 0 | 1 |
| <u>FAM71D</u>   | 0 | 0 | 0 | 1 | 0 | 0 | 0 | 0 | 0 | 0 | 1 |
| <u>ZNF610</u>   | 0 | 0 | 0 | 1 | 0 | 0 | 0 | 0 | 0 | 0 | 1 |
| <u>EPHA5</u>    | 0 | 0 | 0 | 1 | 0 | 0 | 0 | 0 | 0 | 0 | 1 |
| <u>FASTKD2</u>  | 0 | 0 | 0 | 1 | 0 | 0 | 0 | 0 | 0 | 0 | 1 |
| <u>ABCA5</u>    | 0 | 0 | 0 | 1 | 0 | 0 | 0 | 0 | 0 | 0 | 1 |
| <u>CBX5</u>     | 0 | 0 | 0 | 1 | 0 | 0 | 0 | 0 | 0 | 0 | 1 |
| <u>CBX5</u>     | 0 | 0 | 0 | 1 | 0 | 0 | 0 | 0 | 0 | 0 | 1 |
| <u>NTSR2</u>    | 0 | 0 | 0 | 1 | 0 | 0 | 0 | 0 | 0 | 0 | 1 |
| <u>GAB1</u>     | 0 | 0 | 0 | 1 | 0 | 0 | 0 | 0 | 0 | 0 | 1 |
| <u>EGFL6</u>    | 0 | 0 | 0 | 1 | 0 | 0 | 0 | 0 | 0 | 0 | 1 |
| <u>DPH3</u>     | 0 | 0 | 0 | 1 | 0 | 0 | 0 | 0 | 0 | 0 | 1 |
| <u>GPR39</u>    | 0 | 0 | 0 | 1 | 0 | 0 | 0 | 0 | 0 | 0 | 1 |
| <u>MRPL22</u>   | 0 | 0 | 0 | 1 | 0 | 0 | 0 | 0 | 0 | 0 | 1 |
| <u>GRM8</u>     | 0 | 0 | 0 | 1 | 0 | 0 | 0 | 0 | 0 | 0 | 1 |
| <u>CCDC36</u>   | 0 | 0 | 0 | 1 | 0 | 0 | 0 | 0 | 0 | 0 | 1 |
| <u>INPP4A</u>   | 0 | 0 | 0 | 1 | 0 | 0 | 0 | 0 | 0 | 0 | 1 |
| <u>INPP4A</u>   | 0 | 0 | 0 | 1 | 0 | 0 | 0 | 0 | 0 | 0 | 1 |
| <u>FAM111B</u>  | 0 | 0 | 0 | 1 | 0 | 0 | 0 | 0 | 0 | 0 | 1 |
| <u>KCNH1</u>    | 0 | 0 | 0 | 1 | 0 | 0 | 0 | 0 | 0 | 0 | 1 |

|                 |   |   |   |   |   |   |   |   |   |   |   |
|-----------------|---|---|---|---|---|---|---|---|---|---|---|
| <u>C9orf102</u> | 0 | 0 | 0 | 1 | 0 | 0 | 0 | 0 | 0 | 0 | 1 |
| <u>LAMA3</u>    | 0 | 0 | 0 | 1 | 0 | 0 | 0 | 0 | 0 | 0 | 1 |
| <u>LMNA</u>     | 0 | 0 | 0 | 1 | 0 | 0 | 0 | 0 | 0 | 0 | 1 |
| <u>MATN2</u>    | 0 | 0 | 0 | 1 | 0 | 0 | 0 | 0 | 0 | 0 | 1 |
| <u>MDM2</u>     | 0 | 0 | 0 | 1 | 0 | 0 | 0 | 0 | 0 | 0 | 1 |
| <u>MDM2</u>     | 0 | 0 | 0 | 1 | 0 | 0 | 0 | 0 | 0 | 0 | 1 |
| <u>ASPH</u>     | 0 | 0 | 0 | 1 | 0 | 0 | 0 | 0 | 0 | 0 | 1 |
| <u>MYBPC1</u>   | 0 | 0 | 0 | 1 | 0 | 0 | 0 | 0 | 0 | 0 | 1 |
| <u>NF2</u>      | 0 | 0 | 0 | 1 | 0 | 0 | 0 | 0 | 0 | 0 | 1 |
| <u>OAZ1</u>     | 0 | 0 | 0 | 1 | 0 | 0 | 0 | 0 | 0 | 0 | 1 |
| <u>PAX6</u>     | 0 | 0 | 0 | 1 | 0 | 0 | 0 | 0 | 0 | 0 | 1 |
| <u>PCBP2</u>    | 0 | 0 | 0 | 1 | 0 | 0 | 0 | 0 | 0 | 0 | 1 |
| <u>PCBP2</u>    | 0 | 0 | 0 | 1 | 0 | 0 | 0 | 0 | 0 | 0 | 1 |
| <u>PCBP2</u>    | 0 | 0 | 0 | 1 | 0 | 0 | 0 | 0 | 0 | 0 | 1 |
| <u>PCBP2</u>    | 0 | 0 | 0 | 1 | 0 | 0 | 0 | 0 | 0 | 0 | 1 |
| <u>PCBP2</u>    | 0 | 0 | 0 | 1 | 0 | 0 | 0 | 0 | 0 | 0 | 1 |
| <u>PCBP2</u>    | 0 | 0 | 0 | 1 | 0 | 0 | 0 | 0 | 0 | 0 | 1 |
| <u>RNF12</u>    | 0 | 0 | 0 | 1 | 0 | 0 | 0 | 0 | 0 | 0 | 1 |
| <u>SERPINA1</u> | 0 | 0 | 0 | 1 | 0 | 0 | 0 | 0 | 0 | 0 | 1 |
| <u>SERPINA1</u> | 0 | 0 | 0 | 1 | 0 | 0 | 0 | 0 | 0 | 0 | 1 |
| <u>SERPINA1</u> | 0 | 0 | 0 | 1 | 0 | 0 | 0 | 0 | 0 | 0 | 1 |
| <u>SERPINA1</u> | 0 | 0 | 0 | 1 | 0 | 0 | 0 | 0 | 0 | 0 | 1 |
| <u>SERPINA1</u> | 0 | 0 | 0 | 1 | 0 | 0 | 0 | 0 | 0 | 0 | 1 |
| <u>SERPINA1</u> | 0 | 0 | 0 | 1 | 0 | 0 | 0 | 0 | 0 | 0 | 1 |
| <u>SERPINA1</u> | 0 | 0 | 0 | 1 | 0 | 0 | 0 | 0 | 0 | 0 | 1 |
| <u>SERPINA1</u> | 0 | 0 | 0 | 1 | 0 | 0 | 0 | 0 | 0 | 0 | 1 |
| <u>SERPINA1</u> | 0 | 0 | 0 | 1 | 0 | 0 | 0 | 0 | 0 | 0 | 1 |
| <u>SERPINA1</u> | 0 | 0 | 0 | 1 | 0 | 0 | 0 | 0 | 0 | 0 | 1 |
| <u>A2BP1</u>    | 0 | 0 | 0 | 1 | 0 | 0 | 0 | 0 | 0 | 0 | 1 |
| <u>WDR79</u>    | 0 | 0 | 0 | 1 | 0 | 0 | 0 | 0 | 0 | 0 | 1 |
| <u>LEPREL1</u>  | 0 | 0 | 0 | 1 | 0 | 0 | 0 | 0 | 0 | 0 | 1 |
| <u>PPP6C</u>    | 0 | 0 | 0 | 1 | 0 | 0 | 0 | 0 | 0 | 0 | 1 |
| <u>PPP6C</u>    | 0 | 0 | 0 | 1 | 0 | 0 | 0 | 0 | 0 | 0 | 1 |
| <u>JMJD1A</u>   | 0 | 0 | 0 | 1 | 0 | 0 | 0 | 0 | 0 | 0 | 1 |
| <u>MAPK9</u>    | 0 | 0 | 0 | 1 | 0 | 0 | 0 | 0 | 0 | 0 | 1 |
| <u>MAPK9</u>    | 0 | 0 | 0 | 1 | 0 | 0 | 0 | 0 | 0 | 0 | 1 |
| <u>CPA6</u>     | 0 | 0 | 0 | 1 | 0 | 0 | 0 | 0 | 0 | 0 | 1 |
| <u>C13orf1</u>  | 0 | 0 | 0 | 1 | 0 | 0 | 0 | 0 | 0 | 0 | 1 |
| <u>C8orf79</u>  | 0 | 0 | 0 | 1 | 0 | 0 | 0 | 0 | 0 | 0 | 1 |
| <u>PTPRD</u>    | 0 | 0 | 0 | 1 | 0 | 0 | 0 | 0 | 0 | 0 | 1 |
| <u>RBMS1</u>    | 0 | 0 | 0 | 1 | 0 | 0 | 0 | 0 | 0 | 0 | 1 |
| <u>RBP1</u>     | 0 | 0 | 0 | 1 | 0 | 0 | 0 | 0 | 0 | 0 | 1 |



|                  |   |   |   |   |   |   |   |   |   |   |   |
|------------------|---|---|---|---|---|---|---|---|---|---|---|
| <u>BCL7A</u>     | 0 | 0 | 0 | 1 | 0 | 0 | 0 | 0 | 0 | 0 | 1 |
| <u>RORA</u>      | 0 | 0 | 0 | 1 | 0 | 0 | 0 | 0 | 0 | 0 | 1 |
| <u>RORA</u>      | 0 | 0 | 0 | 1 | 0 | 0 | 0 | 0 | 0 | 0 | 1 |
| <u>ATXN7</u>     | 0 | 0 | 0 | 1 | 0 | 0 | 0 | 0 | 0 | 0 | 1 |
| <u>SCP2</u>      | 0 | 0 | 0 | 1 | 0 | 0 | 0 | 0 | 0 | 0 | 1 |
| <u>SCP2</u>      | 0 | 0 | 0 | 1 | 0 | 0 | 0 | 0 | 0 | 0 | 1 |
| <u>ERAP2</u>     | 0 | 0 | 0 | 1 | 0 | 0 | 0 | 0 | 0 | 0 | 1 |
| <u>WIPF3</u>     | 0 | 0 | 0 | 1 | 0 | 0 | 0 | 0 | 0 | 0 | 1 |
| <u>CRTC3</u>     | 0 | 0 | 0 | 1 | 0 | 0 | 0 | 0 | 0 | 0 | 1 |
| <u>SLC12A3</u>   | 0 | 0 | 0 | 1 | 0 | 0 | 0 | 0 | 0 | 0 | 1 |
| <u>SLC12A3</u>   | 0 | 0 | 0 | 1 | 0 | 0 | 0 | 0 | 0 | 0 | 1 |
| <u>TMEM108</u>   | 0 | 0 | 0 | 1 | 0 | 0 | 0 | 0 | 0 | 0 | 1 |
| <u>STAT5A</u>    | 0 | 0 | 0 | 1 | 0 | 0 | 0 | 0 | 0 | 0 | 1 |
| <u>TAF9</u>      | 0 | 0 | 0 | 1 | 0 | 0 | 0 | 0 | 0 | 0 | 1 |
| <u>TCF7L2</u>    | 0 | 0 | 0 | 1 | 0 | 0 | 0 | 0 | 0 | 0 | 1 |
| <u>TGFB2</u>     | 0 | 0 | 0 | 1 | 0 | 0 | 0 | 0 | 0 | 0 | 1 |
| <u>TIA1</u>      | 0 | 0 | 0 | 1 | 0 | 0 | 0 | 0 | 0 | 0 | 1 |
| <u>TPM3</u>      | 0 | 0 | 0 | 1 | 0 | 0 | 0 | 0 | 0 | 0 | 1 |
| <u>TXNRD1</u>    | 0 | 0 | 0 | 1 | 0 | 0 | 0 | 0 | 0 | 0 | 1 |
| <u>CHCHD7</u>    | 0 | 0 | 0 | 1 | 0 | 0 | 0 | 0 | 0 | 0 | 1 |
| <u>CHCHD7</u>    | 0 | 0 | 0 | 1 | 0 | 0 | 0 | 0 | 0 | 0 | 1 |
| <u>CHCHD7</u>    | 0 | 0 | 0 | 1 | 0 | 0 | 0 | 0 | 0 | 0 | 1 |
| <u>FCRL2</u>     | 0 | 0 | 0 | 1 | 0 | 0 | 0 | 0 | 0 | 0 | 1 |
| <u>LRRC2</u>     | 0 | 0 | 0 | 1 | 0 | 0 | 0 | 0 | 0 | 0 | 1 |
| <u>C11orf61</u>  | 0 | 0 | 0 | 1 | 0 | 0 | 0 | 0 | 0 | 0 | 1 |
| <u>SAP30L</u>    | 0 | 0 | 0 | 1 | 0 | 0 | 0 | 0 | 0 | 0 | 1 |
| <u>SAP30L</u>    | 0 | 0 | 0 | 1 | 0 | 0 | 0 | 0 | 0 | 0 | 1 |
| <u>PHF17</u>     | 0 | 0 | 0 | 1 | 0 | 0 | 0 | 0 | 0 | 0 | 1 |
| <u>PTGES2</u>    | 0 | 0 | 0 | 1 | 0 | 0 | 0 | 0 | 0 | 0 | 1 |
| <u>PTGES2</u>    | 0 | 0 | 0 | 1 | 0 | 0 | 0 | 0 | 0 | 0 | 1 |
| <u>RAB11FIP1</u> | 0 | 0 | 0 | 1 | 0 | 0 | 0 | 0 | 0 | 0 | 1 |
| <u>TDRD3</u>     | 0 | 0 | 0 | 1 | 0 | 0 | 0 | 0 | 0 | 0 | 1 |
| <u>COLO</u>      | 0 | 0 | 0 | 1 | 0 | 0 | 0 | 0 | 0 | 0 | 1 |
| <u>COLO</u>      | 0 | 0 | 0 | 1 | 0 | 0 | 0 | 0 | 0 | 0 | 1 |
| <u>MRO</u>       | 0 | 0 | 0 | 1 | 0 | 0 | 0 | 0 | 0 | 0 | 1 |
| <u>MRO</u>       | 0 | 0 | 0 | 1 | 0 | 0 | 0 | 0 | 0 | 0 | 1 |
| <u>ACBD6</u>     | 0 | 0 | 0 | 1 | 0 | 0 | 0 | 0 | 0 | 0 | 1 |
| <u>ZMAT1</u>     | 0 | 0 | 0 | 1 | 0 | 0 | 0 | 0 | 0 | 0 | 1 |
| <u>ITGA10</u>    | 0 | 0 | 0 | 1 | 0 | 0 | 0 | 0 | 0 | 0 | 1 |
| <u>SCARF1</u>    | 0 | 0 | 0 | 1 | 0 | 0 | 0 | 0 | 0 | 0 | 1 |
| <u>ADAM9</u>     | 0 | 0 | 0 | 1 | 0 | 0 | 0 | 0 | 0 | 0 | 1 |





















































|                 |   |   |   |   |   |   |   |   |   |   |   |
|-----------------|---|---|---|---|---|---|---|---|---|---|---|
| <u>MS4A3</u>    | 0 | 1 | 0 | 0 | 0 | 0 | 0 | 0 | 0 | 0 | 1 |
| <u>EFTUD2</u>   | 0 | 1 | 0 | 0 | 0 | 0 | 0 | 0 | 0 | 0 | 1 |
| <u>SLIT2</u>    | 0 | 1 | 0 | 0 | 0 | 0 | 0 | 0 | 0 | 0 | 1 |
| <u>SLC22A14</u> | 0 | 1 | 0 | 0 | 0 | 0 | 0 | 0 | 0 | 0 | 1 |
| <u>ORMDL1</u>   | 0 | 1 | 0 | 0 | 0 | 0 | 0 | 0 | 0 | 0 | 1 |
| <u>VPS26A</u>   | 0 | 1 | 0 | 0 | 0 | 0 | 0 | 0 | 0 | 0 | 1 |
| <u>BRE</u>      | 0 | 1 | 0 | 0 | 0 | 0 | 0 | 0 | 0 | 0 | 1 |
| <u>BRE</u>      | 0 | 1 | 0 | 0 | 0 | 0 | 0 | 0 | 0 | 0 | 1 |
| <u>RBM39</u>    | 0 | 1 | 0 | 0 | 0 | 0 | 0 | 0 | 0 | 0 | 1 |
| <u>WTAP</u>     | 0 | 1 | 0 | 0 | 0 | 0 | 0 | 0 | 0 | 0 | 1 |
| <u>CD44</u>     | 0 | 1 | 0 | 0 | 0 | 0 | 0 | 0 | 0 | 0 | 1 |
| <u>NCOR1</u>    | 0 | 1 | 0 | 0 | 0 | 0 | 0 | 0 | 0 | 0 | 1 |
| <u>RIMS2</u>    | 0 | 1 | 0 | 0 | 0 | 0 | 0 | 0 | 0 | 0 | 1 |
| <u>TBC1D5</u>   | 0 | 1 | 0 | 0 | 0 | 0 | 0 | 0 | 0 | 0 | 1 |
| <u>ARMCX2</u>   | 0 | 1 | 0 | 0 | 0 | 0 | 0 | 0 | 0 | 0 | 1 |
| <u>TRIM14</u>   | 0 | 1 | 0 | 0 | 0 | 0 | 0 | 0 | 0 | 0 | 1 |
| <u>EPM2AIP1</u> | 0 | 1 | 0 | 0 | 0 | 0 | 0 | 0 | 0 | 0 | 1 |
| <u>ARHGAP25</u> | 0 | 1 | 0 | 0 | 0 | 0 | 0 | 0 | 0 | 0 | 1 |
| <u>CDC42</u>    | 0 | 1 | 0 | 0 | 0 | 0 | 0 | 0 | 0 | 0 | 1 |
| <u>SLC35A1</u>  | 0 | 0 | 1 | 0 | 0 | 0 | 0 | 0 | 0 | 0 | 1 |
| <u>KIT</u>      | 0 | 0 | 0 | 0 | 1 | 0 | 0 | 0 | 0 | 0 | 1 |
| <u>NAT5</u>     | 0 | 0 | 0 | 0 | 1 | 0 | 0 | 0 | 0 | 0 | 1 |
| <u>NAT5</u>     | 0 | 0 | 0 | 0 | 1 | 0 | 0 | 0 | 0 | 0 | 1 |
| <u>NAT5</u>     | 0 | 0 | 0 | 0 | 1 | 0 | 0 | 0 | 0 | 0 | 1 |
| <u>PDE3A</u>    | 0 | 0 | 0 | 0 | 1 | 0 | 0 | 0 | 0 | 0 | 1 |
| <u>SELS</u>     | 0 | 0 | 0 | 0 | 1 | 0 | 0 | 0 | 0 | 0 | 1 |
| <u>ZMIZ2</u>    | 0 | 0 | 0 | 0 | 0 | 0 | 1 | 0 | 0 | 0 | 1 |
| <u>CLIC4</u>    | 0 | 0 | 0 | 0 | 0 | 0 | 1 | 0 | 0 | 0 | 1 |
| <u>ASXL1</u>    | 0 | 0 | 0 | 0 | 0 | 0 | 1 | 0 | 0 | 0 | 1 |
| <u>INPP5B</u>   | 0 | 0 | 0 | 0 | 0 | 0 | 1 | 0 | 0 | 0 | 1 |
| <u>TMTC4</u>    | 0 | 0 | 0 | 0 | 0 | 0 | 1 | 0 | 0 | 0 | 1 |
| <u>STEAP3</u>   | 0 | 0 | 0 | 0 | 0 | 0 | 1 | 0 | 0 | 0 | 1 |
| <u>PCDHGC3</u>  | 0 | 0 | 0 | 0 | 0 | 0 | 1 | 0 | 0 | 0 | 1 |
| <u>FYTTD1</u>   | 0 | 0 | 0 | 0 | 0 | 0 | 1 | 0 | 0 | 0 | 1 |
| <u>DCTN5</u>    | 0 | 0 | 0 | 0 | 0 | 0 | 1 | 0 | 0 | 0 | 1 |
| <u>C1orf135</u> | 0 | 0 | 0 | 0 | 0 | 0 | 1 | 0 | 0 | 0 | 1 |
| <u>CRKRS</u>    | 0 | 0 | 0 | 0 | 0 | 0 | 1 | 0 | 0 | 0 | 1 |
| <u>PCDHGB6</u>  | 0 | 0 | 0 | 0 | 0 | 0 | 1 | 0 | 0 | 0 | 1 |
| <u>FBXO31</u>   | 0 | 0 | 0 | 0 | 0 | 0 | 1 | 0 | 0 | 0 | 1 |
| <u>WDR65</u>    | 0 | 0 | 0 | 0 | 0 | 0 | 1 | 0 | 0 | 0 | 1 |
| <u>MUC20</u>    | 0 | 0 | 0 | 0 | 0 | 0 | 1 | 0 | 0 | 0 | 1 |

|                  |   |   |   |   |   |   |   |   |   |   |   |
|------------------|---|---|---|---|---|---|---|---|---|---|---|
| <u>EAPP</u>      | 0 | 0 | 0 | 0 | 0 | 0 | 1 | 0 | 0 | 0 | 1 |
| <u>ZDHHC11</u>   | 0 | 0 | 0 | 0 | 0 | 0 | 1 | 0 | 0 | 0 | 1 |
| <u>MARCKSL1</u>  | 0 | 0 | 0 | 0 | 0 | 0 | 1 | 0 | 0 | 0 | 1 |
| <u>NDNL2</u>     | 0 | 0 | 0 | 0 | 0 | 0 | 1 | 0 | 0 | 0 | 1 |
| <u>GLDC</u>      | 0 | 0 | 0 | 0 | 0 | 0 | 1 | 0 | 0 | 0 | 1 |
| <u>C1orf213</u>  | 0 | 0 | 0 | 0 | 0 | 0 | 1 | 0 | 0 | 0 | 1 |
| <u>MYCT1</u>     | 0 | 0 | 0 | 0 | 0 | 0 | 1 | 0 | 0 | 0 | 1 |
| <u>BCL11B</u>    | 0 | 0 | 0 | 0 | 0 | 0 | 1 | 0 | 0 | 0 | 1 |
| <u>TLR2</u>      | 0 | 0 | 0 | 0 | 0 | 0 | 1 | 0 | 0 | 0 | 1 |
| <u>LOC644285</u> | 0 | 0 | 0 | 0 | 0 | 0 | 1 | 0 | 0 | 0 | 1 |
| <u>CDKN2D</u>    | 0 | 0 | 0 | 0 | 0 | 0 | 1 | 0 | 0 | 0 | 1 |
| <u>SMARCE1</u>   | 0 | 0 | 0 | 0 | 0 | 0 | 1 | 0 | 0 | 0 | 1 |
| <u>GABRP</u>     | 0 | 0 | 0 | 0 | 0 | 0 | 1 | 0 | 0 | 0 | 1 |
| <u>GJA5</u>      | 0 | 0 | 0 | 0 | 0 | 0 | 1 | 0 | 0 | 0 | 1 |
| <u>VAX2</u>      | 0 | 0 | 0 | 0 | 0 | 0 | 1 | 0 | 0 | 0 | 1 |
| <u>ATG9A</u>     | 0 | 0 | 0 | 0 | 0 | 0 | 1 | 0 | 0 | 0 | 1 |
| <u>GNG4</u>      | 0 | 0 | 0 | 0 | 0 | 0 | 1 | 0 | 0 | 0 | 1 |
| <u>NUDT13</u>    | 0 | 0 | 0 | 0 | 0 | 0 | 1 | 0 | 0 | 0 | 1 |
| <u>SYNE2</u>     | 0 | 0 | 0 | 0 | 0 | 0 | 1 | 0 | 0 | 0 | 1 |
| <u>TSR2</u>      | 0 | 0 | 0 | 0 | 0 | 0 | 1 | 0 | 0 | 0 | 1 |
| <u>ATG4A</u>     | 0 | 0 | 0 | 0 | 0 | 0 | 1 | 0 | 0 | 0 | 1 |
| <u>DDEF1</u>     | 0 | 0 | 0 | 0 | 0 | 0 | 1 | 0 | 0 | 0 | 1 |
| <u>CDK5R1</u>    | 0 | 0 | 0 | 0 | 0 | 0 | 1 | 0 | 0 | 0 | 1 |
| <u>CLDND1</u>    | 0 | 0 | 0 | 0 | 0 | 0 | 1 | 0 | 0 | 0 | 1 |
| <u>ECSIT</u>     | 0 | 0 | 0 | 0 | 0 | 0 | 1 | 0 | 0 | 0 | 1 |
| <u>PPP1R3F</u>   | 0 | 0 | 0 | 0 | 0 | 0 | 1 | 0 | 0 | 0 | 1 |
| <u>NCAN</u>      | 0 | 0 | 0 | 0 | 0 | 0 | 1 | 0 | 0 | 0 | 1 |
| <u>CCNI</u>      | 0 | 0 | 0 | 0 | 0 | 0 | 1 | 0 | 0 | 0 | 1 |
| <u>TAGAP</u>     | 0 | 0 | 0 | 0 | 0 | 0 | 1 | 0 | 0 | 0 | 1 |
| <u>SEMA4D</u>    | 0 | 0 | 0 | 0 | 0 | 0 | 1 | 0 | 0 | 0 | 1 |
| <u>C1orf59</u>   | 0 | 0 | 0 | 0 | 0 | 0 | 1 | 0 | 0 | 0 | 1 |
| <u>FKRP</u>      | 0 | 0 | 0 | 0 | 0 | 0 | 1 | 0 | 0 | 0 | 1 |
| <u>NGFR</u>      | 0 | 0 | 0 | 0 | 0 | 0 | 1 | 0 | 0 | 0 | 1 |
| <u>ZNF629</u>    | 0 | 0 | 0 | 0 | 0 | 0 | 1 | 0 | 0 | 0 | 1 |
| <u>ABCF2</u>     | 0 | 0 | 0 | 0 | 0 | 0 | 1 | 0 | 0 | 0 | 1 |
| <u>UCN2</u>      | 0 | 0 | 0 | 0 | 0 | 0 | 1 | 0 | 0 | 0 | 1 |
| <u>CHST10</u>    | 0 | 0 | 0 | 0 | 0 | 0 | 1 | 0 | 0 | 0 | 1 |
| <u>ABCB9</u>     | 0 | 0 | 0 | 0 | 0 | 0 | 1 | 0 | 0 | 0 | 1 |
| <u>NEK3</u>      | 0 | 0 | 0 | 0 | 0 | 0 | 1 | 0 | 0 | 0 | 1 |
| <u>PCDHGA10</u>  | 0 | 0 | 0 | 0 | 0 | 0 | 1 | 0 | 0 | 0 | 1 |
| <u>ATXN7L3</u>   | 0 | 0 | 0 | 0 | 0 | 0 | 1 | 0 | 0 | 0 | 1 |

|                  |   |   |   |   |   |   |   |   |   |   |   |
|------------------|---|---|---|---|---|---|---|---|---|---|---|
| <u>TMOD2</u>     | 0 | 0 | 0 | 0 | 0 | 0 | 1 | 0 | 0 | 0 | 1 |
| <u>MAPK14</u>    | 0 | 0 | 0 | 0 | 0 | 0 | 1 | 0 | 0 | 0 | 1 |
| <u>GPR55</u>     | 0 | 0 | 0 | 0 | 0 | 0 | 1 | 0 | 0 | 0 | 1 |
| <u>CYP27C1</u>   | 0 | 0 | 0 | 0 | 0 | 0 | 1 | 0 | 0 | 0 | 1 |
| <u>AP2B1</u>     | 0 | 0 | 0 | 0 | 0 | 0 | 1 | 0 | 0 | 0 | 1 |
| <u>ZNF784</u>    | 0 | 0 | 0 | 0 | 0 | 0 | 1 | 0 | 0 | 0 | 1 |
| <u>LOC606495</u> | 0 | 0 | 0 | 0 | 0 | 0 | 1 | 0 | 0 | 0 | 1 |
| <u>DSTN</u>      | 0 | 0 | 0 | 0 | 0 | 0 | 1 | 0 | 0 | 0 | 1 |
| <u>STX1A</u>     | 0 | 0 | 0 | 0 | 0 | 0 | 1 | 0 | 0 | 0 | 1 |
| <u>RAX2</u>      | 0 | 0 | 0 | 0 | 0 | 0 | 1 | 0 | 0 | 0 | 1 |
| <u>SLC24A6</u>   | 0 | 0 | 0 | 0 | 0 | 0 | 1 | 0 | 0 | 0 | 1 |
| <u>MED12</u>     | 0 | 0 | 0 | 0 | 0 | 0 | 1 | 0 | 0 | 0 | 1 |
| <u>GP1BA</u>     | 0 | 0 | 0 | 0 | 0 | 0 | 1 | 0 | 0 | 0 | 1 |
| <u>ASH1L</u>     | 0 | 0 | 0 | 0 | 0 | 0 | 1 | 0 | 0 | 0 | 1 |
| <u>TNFRSF25</u>  | 0 | 0 | 0 | 0 | 0 | 0 | 1 | 0 | 0 | 0 | 1 |
| <u>MAPKAPK2</u>  | 0 | 0 | 0 | 0 | 0 | 0 | 1 | 0 | 0 | 0 | 1 |
| <u>C17orf67</u>  | 0 | 0 | 0 | 0 | 0 | 0 | 1 | 0 | 0 | 0 | 1 |
| <u>EFR3A</u>     | 0 | 0 | 0 | 0 | 0 | 0 | 1 | 0 | 0 | 0 | 1 |
| <u>C4orf42</u>   | 0 | 0 | 0 | 0 | 0 | 0 | 1 | 0 | 0 | 0 | 1 |
| <u>CA14</u>      | 0 | 0 | 0 | 0 | 0 | 0 | 1 | 0 | 0 | 0 | 1 |
| <u>PPP2R2D</u>   | 0 | 0 | 0 | 0 | 0 | 0 | 1 | 0 | 0 | 0 | 1 |
| <u>FBXO18</u>    | 0 | 0 | 0 | 0 | 0 | 0 | 1 | 0 | 0 | 0 | 1 |
| <u>MAD2L1BP</u>  | 0 | 0 | 0 | 0 | 0 | 0 | 1 | 0 | 0 | 0 | 1 |
| <u>LAMC3</u>     | 0 | 0 | 0 | 0 | 0 | 0 | 1 | 0 | 0 | 0 | 1 |
| <u>NAV3</u>      | 0 | 0 | 0 | 0 | 0 | 0 | 1 | 0 | 0 | 0 | 1 |
| <u>CMBL</u>      | 0 | 0 | 0 | 0 | 0 | 0 | 1 | 0 | 0 | 0 | 1 |
| <u>PLEKHM1</u>   | 0 | 0 | 0 | 0 | 0 | 0 | 1 | 0 | 0 | 0 | 1 |
| <u>PRDM8</u>     | 0 | 0 | 0 | 0 | 0 | 0 | 1 | 0 | 0 | 0 | 1 |
| <u>GDF10</u>     | 0 | 0 | 0 | 0 | 0 | 0 | 1 | 0 | 0 | 0 | 1 |
| <u>FAM113A</u>   | 0 | 0 | 0 | 0 | 0 | 0 | 1 | 0 | 0 | 0 | 1 |
| <u>C7orf45</u>   | 0 | 0 | 0 | 0 | 0 | 0 | 1 | 0 | 0 | 0 | 1 |
| <u>XIRP1</u>     | 0 | 0 | 0 | 0 | 0 | 0 | 1 | 0 | 0 | 0 | 1 |
| <u>C1orf55</u>   | 0 | 0 | 0 | 0 | 0 | 0 | 1 | 0 | 0 | 0 | 1 |
| <u>RNASE11</u>   | 0 | 0 | 0 | 0 | 0 | 0 | 1 | 0 | 0 | 0 | 1 |
| <u>SC4MOL</u>    | 0 | 0 | 0 | 0 | 0 | 0 | 1 | 0 | 0 | 0 | 1 |
| <u>PSMA7</u>     | 0 | 0 | 0 | 0 | 0 | 0 | 1 | 0 | 0 | 0 | 1 |
| <u>NR2C2AP</u>   | 0 | 0 | 0 | 0 | 0 | 0 | 1 | 0 | 0 | 0 | 1 |
| <u>CCL19</u>     | 0 | 0 | 0 | 0 | 0 | 0 | 1 | 0 | 0 | 0 | 1 |
| <u>SLC6A17</u>   | 0 | 0 | 0 | 0 | 0 | 0 | 1 | 0 | 0 | 0 | 1 |
| <u>LILRB1</u>    | 0 | 0 | 0 | 0 | 0 | 0 | 1 | 0 | 0 | 0 | 1 |
| <u>CRB2</u>      | 0 | 0 | 0 | 0 | 0 | 0 | 1 | 0 | 0 | 0 | 1 |

|                 |   |   |   |   |   |   |   |   |   |   |   |
|-----------------|---|---|---|---|---|---|---|---|---|---|---|
| <u>PEX12</u>    | 0 | 0 | 0 | 0 | 0 | 0 | 1 | 0 | 0 | 0 | 1 |
| <u>CADPS</u>    | 0 | 0 | 0 | 0 | 0 | 0 | 1 | 0 | 0 | 0 | 1 |
| <u>CDK5RAP2</u> | 0 | 0 | 0 | 0 | 0 | 0 | 1 | 0 | 0 | 0 | 1 |
| <u>WEE1</u>     | 0 | 0 | 0 | 0 | 0 | 0 | 1 | 0 | 0 | 0 | 1 |
| <u>SPOCK2</u>   | 0 | 0 | 0 | 0 | 0 | 0 | 1 | 0 | 0 | 0 | 1 |
| <u>WDR59</u>    | 0 | 0 | 0 | 0 | 0 | 0 | 1 | 0 | 0 | 0 | 1 |
| <u>TRAIP</u>    | 0 | 0 | 0 | 0 | 0 | 0 | 1 | 0 | 0 | 0 | 1 |
| <u>TAGLN</u>    | 0 | 0 | 0 | 0 | 0 | 0 | 1 | 0 | 0 | 0 | 1 |
| <u>METT10D</u>  | 0 | 0 | 0 | 0 | 0 | 0 | 1 | 0 | 0 | 0 | 1 |
| <u>HCN3</u>     | 0 | 0 | 0 | 0 | 0 | 0 | 1 | 0 | 0 | 0 | 1 |
| <u>TFAP2C</u>   | 0 | 0 | 0 | 0 | 0 | 0 | 1 | 0 | 0 | 0 | 1 |
| <u>KLHL21</u>   | 0 | 0 | 0 | 0 | 0 | 0 | 1 | 0 | 0 | 0 | 1 |
| <u>PIK3C3</u>   | 0 | 0 | 0 | 0 | 0 | 0 | 1 | 0 | 0 | 0 | 1 |
| <u>LAMP1</u>    | 0 | 0 | 0 | 0 | 0 | 0 | 1 | 0 | 0 | 0 | 1 |
| <u>SPEN</u>     | 0 | 0 | 0 | 0 | 0 | 0 | 1 | 0 | 0 | 0 | 1 |
| <u>PCMTD2</u>   | 0 | 0 | 0 | 0 | 0 | 0 | 1 | 0 | 0 | 0 | 1 |
| <u>PLOD2</u>    | 0 | 0 | 0 | 0 | 0 | 0 | 1 | 0 | 0 | 0 | 1 |
| <u>SLC25A17</u> | 0 | 0 | 0 | 0 | 0 | 0 | 1 | 0 | 0 | 0 | 1 |
| <u>HTR4</u>     | 0 | 0 | 0 | 0 | 0 | 0 | 1 | 0 | 0 | 0 | 1 |
| <u>ZNF313</u>   | 0 | 0 | 0 | 0 | 0 | 0 | 1 | 0 | 0 | 0 | 1 |
| <u>FAM136A</u>  | 0 | 0 | 0 | 0 | 0 | 0 | 1 | 0 | 0 | 0 | 1 |
| <u>HCCS</u>     | 0 | 0 | 0 | 0 | 0 | 0 | 1 | 0 | 0 | 0 | 1 |
| <u>KCNQ2</u>    | 0 | 0 | 0 | 0 | 0 | 0 | 1 | 0 | 0 | 0 | 1 |
| <u>ZNF497</u>   | 0 | 0 | 0 | 0 | 0 | 0 | 1 | 0 | 0 | 0 | 1 |
| <u>FAM110A</u>  | 0 | 0 | 0 | 0 | 0 | 0 | 1 | 0 | 0 | 0 | 1 |
| <u>GRTP1</u>    | 0 | 0 | 0 | 0 | 0 | 0 | 1 | 0 | 0 | 0 | 1 |
| <u>CMIP</u>     | 0 | 0 | 0 | 0 | 0 | 0 | 1 | 0 | 0 | 0 | 1 |
| <u>RCAN2</u>    | 0 | 0 | 0 | 0 | 0 | 0 | 1 | 0 | 0 | 0 | 1 |
| <u>STK16</u>    | 0 | 0 | 0 | 0 | 0 | 0 | 1 | 0 | 0 | 0 | 1 |
| <u>PPP2R5C</u>  | 0 | 0 | 0 | 0 | 0 | 0 | 1 | 0 | 0 | 0 | 1 |
| <u>SIM2</u>     | 0 | 0 | 0 | 0 | 0 | 0 | 1 | 0 | 0 | 0 | 1 |
| <u>ARSD</u>     | 0 | 0 | 0 | 0 | 0 | 0 | 1 | 0 | 0 | 0 | 1 |
| <u>GTF3C2</u>   | 0 | 0 | 0 | 0 | 0 | 0 | 1 | 0 | 0 | 0 | 1 |
| <u>APOL4</u>    | 0 | 0 | 0 | 0 | 0 | 0 | 1 | 0 | 0 | 0 | 1 |
| <u>PPA2</u>     | 0 | 0 | 0 | 0 | 0 | 0 | 1 | 0 | 0 | 0 | 1 |
| <u>KIF26B</u>   | 0 | 0 | 0 | 0 | 0 | 0 | 1 | 0 | 0 | 0 | 1 |
| <u>FOXP3</u>    | 0 | 0 | 0 | 0 | 0 | 0 | 1 | 0 | 0 | 0 | 1 |
| <u>C11orf54</u> | 0 | 0 | 0 | 0 | 0 | 0 | 1 | 0 | 0 | 0 | 1 |
| <u>KLHDC8B</u>  | 0 | 0 | 0 | 0 | 0 | 0 | 1 | 0 | 0 | 0 | 1 |
| <u>LMOD2</u>    | 0 | 0 | 0 | 0 | 0 | 0 | 1 | 0 | 0 | 0 | 1 |
| <u>PLA2G2F</u>  | 0 | 0 | 0 | 0 | 0 | 0 | 1 | 0 | 0 | 0 | 1 |

|                 |   |   |   |   |   |   |   |   |   |   |   |
|-----------------|---|---|---|---|---|---|---|---|---|---|---|
| <u>MAGI2</u>    | 0 | 0 | 0 | 0 | 0 | 0 | 1 | 0 | 0 | 0 | 1 |
| <u>KCNJ14</u>   | 0 | 0 | 0 | 0 | 0 | 0 | 1 | 0 | 0 | 0 | 1 |
| <u>TMEM184A</u> | 0 | 0 | 0 | 0 | 0 | 0 | 1 | 0 | 0 | 0 | 1 |
| <u>CPB1</u>     | 0 | 0 | 0 | 0 | 0 | 0 | 1 | 0 | 0 | 0 | 1 |
| <u>PBXIP1</u>   | 0 | 0 | 0 | 0 | 0 | 0 | 1 | 0 | 0 | 0 | 1 |
| <u>ZDHHC6</u>   | 0 | 0 | 0 | 0 | 0 | 0 | 1 | 0 | 0 | 0 | 1 |
| <u>STAG2</u>    | 0 | 0 | 0 | 0 | 0 | 0 | 1 | 0 | 0 | 0 | 1 |
| <u>PGLYRP4</u>  | 0 | 0 | 0 | 0 | 0 | 0 | 1 | 0 | 0 | 0 | 1 |
| <u>SOHLH1</u>   | 0 | 0 | 0 | 0 | 0 | 0 | 1 | 0 | 0 | 0 | 1 |
| <u>EGLN2</u>    | 0 | 0 | 0 | 0 | 0 | 0 | 1 | 0 | 0 | 0 | 1 |
| <u>SLC28A1</u>  | 0 | 0 | 0 | 0 | 0 | 0 | 1 | 0 | 0 | 0 | 1 |
| <u>C1orf201</u> | 0 | 0 | 0 | 0 | 0 | 0 | 1 | 0 | 0 | 0 | 1 |
| <u>CNP</u>      | 0 | 0 | 0 | 0 | 0 | 0 | 1 | 0 | 0 | 0 | 1 |
| <u>PCDHGA9</u>  | 0 | 0 | 0 | 0 | 0 | 0 | 1 | 0 | 0 | 0 | 1 |
| <u>COL5A3</u>   | 0 | 0 | 0 | 0 | 0 | 0 | 1 | 0 | 0 | 0 | 1 |
| <u>ADORA1</u>   | 0 | 0 | 0 | 0 | 0 | 0 | 1 | 0 | 0 | 0 | 1 |
| <u>CETN2</u>    | 0 | 0 | 0 | 0 | 0 | 0 | 1 | 0 | 0 | 0 | 1 |
| <u>LEPR</u>     | 0 | 0 | 0 | 0 | 0 | 0 | 1 | 0 | 0 | 0 | 1 |
| <u>OSM</u>      | 0 | 0 | 0 | 0 | 0 | 0 | 1 | 0 | 0 | 0 | 1 |
| <u>C8orf34</u>  | 0 | 0 | 0 | 0 | 0 | 0 | 1 | 0 | 0 | 0 | 1 |
| <u>SPINLW1</u>  | 0 | 0 | 0 | 0 | 0 | 0 | 1 | 0 | 0 | 0 | 1 |
| <u>OIP5</u>     | 0 | 0 | 0 | 0 | 0 | 0 | 1 | 0 | 0 | 0 | 1 |
| <u>PUM2</u>     | 0 | 0 | 0 | 0 | 0 | 0 | 1 | 0 | 0 | 0 | 1 |
| <u>SNPH</u>     | 0 | 0 | 0 | 0 | 0 | 0 | 1 | 0 | 0 | 0 | 1 |
| <u>SGMS2</u>    | 0 | 0 | 0 | 0 | 0 | 0 | 1 | 0 | 0 | 0 | 1 |
| <u>NEU3</u>     | 0 | 0 | 0 | 0 | 0 | 0 | 1 | 0 | 0 | 0 | 1 |
| <u>TUBGCP4</u>  | 0 | 0 | 0 | 0 | 0 | 0 | 1 | 0 | 0 | 0 | 1 |
| <u>TNFSF8</u>   | 0 | 0 | 0 | 0 | 0 | 0 | 1 | 0 | 0 | 0 | 1 |
| <u>CYP4F22</u>  | 0 | 0 | 0 | 0 | 0 | 0 | 1 | 0 | 0 | 0 | 1 |
| <u>RGR</u>      | 0 | 0 | 0 | 0 | 0 | 0 | 1 | 0 | 0 | 0 | 1 |
| <u>RBM11</u>    | 0 | 0 | 0 | 0 | 0 | 0 | 1 | 0 | 0 | 0 | 1 |
| <u>CCND1</u>    | 0 | 0 | 0 | 0 | 0 | 0 | 1 | 0 | 0 | 0 | 1 |
| <u>CLDN1</u>    | 0 | 0 | 0 | 0 | 0 | 0 | 1 | 0 | 0 | 0 | 1 |
| <u>VCP</u>      | 0 | 0 | 0 | 0 | 0 | 0 | 1 | 0 | 0 | 0 | 1 |
| <u>PDZD3</u>    | 0 | 0 | 0 | 0 | 0 | 0 | 1 | 0 | 0 | 0 | 1 |
| <u>G6PD</u>     | 0 | 0 | 0 | 0 | 0 | 0 | 1 | 0 | 0 | 0 | 1 |
| <u>C17orf58</u> | 0 | 0 | 0 | 0 | 0 | 0 | 1 | 0 | 0 | 0 | 1 |
| <u>FOXC1</u>    | 0 | 0 | 0 | 0 | 0 | 0 | 1 | 0 | 0 | 0 | 1 |
| <u>C9orf156</u> | 0 | 0 | 0 | 0 | 0 | 0 | 1 | 0 | 0 | 0 | 1 |
| <u>FGF17</u>    | 0 | 0 | 0 | 0 | 0 | 0 | 1 | 0 | 0 | 0 | 1 |
| <u>CHST4</u>    | 0 | 0 | 0 | 0 | 0 | 0 | 1 | 0 | 0 | 0 | 1 |

|                  |   |   |   |   |   |   |   |   |   |   |   |
|------------------|---|---|---|---|---|---|---|---|---|---|---|
| <u>NMB</u>       | 0 | 0 | 0 | 0 | 0 | 0 | 1 | 0 | 0 | 0 | 1 |
| <u>TBC1D5</u>    | 0 | 0 | 0 | 0 | 0 | 0 | 1 | 0 | 0 | 0 | 1 |
| <u>SAP30BP</u>   | 0 | 0 | 0 | 0 | 0 | 0 | 1 | 0 | 0 | 0 | 1 |
| <u>ZNF211</u>    | 0 | 0 | 0 | 0 | 0 | 0 | 1 | 0 | 0 | 0 | 1 |
| <u>MRAS</u>      | 0 | 0 | 0 | 0 | 0 | 0 | 1 | 0 | 0 | 0 | 1 |
| <u>REEP2</u>     | 0 | 0 | 0 | 0 | 0 | 0 | 1 | 0 | 0 | 0 | 1 |
| <u>LARP1</u>     | 0 | 0 | 0 | 0 | 0 | 0 | 1 | 0 | 0 | 0 | 1 |
| <u>AGRN</u>      | 0 | 0 | 0 | 0 | 0 | 0 | 1 | 0 | 0 | 0 | 1 |
| <u>PPM1F</u>     | 0 | 0 | 0 | 0 | 0 | 0 | 1 | 0 | 0 | 0 | 1 |
| <u>NAP1L4</u>    | 0 | 0 | 0 | 0 | 0 | 0 | 1 | 0 | 0 | 0 | 1 |
| <u>OXSRI</u>     | 0 | 0 | 0 | 0 | 0 | 0 | 1 | 0 | 0 | 0 | 1 |
| <u>ARHGEF11</u>  | 0 | 0 | 0 | 0 | 0 | 0 | 1 | 0 | 0 | 0 | 1 |
| <u>SMO</u>       | 0 | 0 | 0 | 0 | 0 | 0 | 1 | 0 | 0 | 0 | 1 |
| <u>ROBO1</u>     | 0 | 0 | 0 | 0 | 0 | 0 | 1 | 0 | 0 | 0 | 1 |
| <u>SH3D19</u>    | 0 | 0 | 0 | 0 | 0 | 0 | 1 | 0 | 0 | 0 | 1 |
| <u>P53AIP1</u>   | 0 | 0 | 0 | 0 | 0 | 0 | 1 | 0 | 0 | 0 | 1 |
| <u>GLT1D1</u>    | 0 | 0 | 0 | 0 | 0 | 0 | 1 | 0 | 0 | 0 | 1 |
| <u>CHID1</u>     | 0 | 0 | 0 | 0 | 0 | 0 | 1 | 0 | 0 | 0 | 1 |
| <u>NDE1</u>      | 0 | 0 | 0 | 0 | 0 | 0 | 1 | 0 | 0 | 0 | 1 |
| <u>FLJ10769</u>  | 0 | 0 | 0 | 0 | 0 | 0 | 1 | 0 | 0 | 0 | 1 |
| <u>LOC283871</u> | 0 | 0 | 0 | 0 | 0 | 0 | 1 | 0 | 0 | 0 | 1 |
| <u>UBOX5</u>     | 0 | 0 | 0 | 0 | 0 | 0 | 1 | 0 | 0 | 0 | 1 |
| <u>TMEM128</u>   | 0 | 0 | 0 | 0 | 0 | 0 | 1 | 0 | 0 | 0 | 1 |
| <u>MPPED1</u>    | 0 | 0 | 0 | 0 | 0 | 0 | 1 | 0 | 0 | 0 | 1 |
| <u>HPS1</u>      | 0 | 0 | 0 | 0 | 0 | 0 | 1 | 0 | 0 | 0 | 1 |
| <u>PASK</u>      | 0 | 0 | 0 | 0 | 0 | 0 | 1 | 0 | 0 | 0 | 1 |
| <u>LLGL1</u>     | 0 | 0 | 0 | 0 | 0 | 0 | 1 | 0 | 0 | 0 | 1 |
| <u>CENTG2</u>    | 0 | 0 | 0 | 0 | 0 | 0 | 1 | 0 | 0 | 0 | 1 |
| <u>ZNF132</u>    | 0 | 0 | 0 | 0 | 0 | 0 | 1 | 0 | 0 | 0 | 1 |
| <u>TRPM2</u>     | 0 | 0 | 0 | 0 | 0 | 0 | 1 | 0 | 0 | 0 | 1 |
| <u>PCDHGA11</u>  | 0 | 0 | 0 | 0 | 0 | 0 | 1 | 0 | 0 | 0 | 1 |
| <u>STAT5B</u>    | 0 | 0 | 0 | 0 | 0 | 0 | 1 | 0 | 0 | 0 | 1 |
| <u>PTPRM</u>     | 0 | 0 | 0 | 0 | 0 | 0 | 1 | 0 | 0 | 0 | 1 |
| <u>APOL1</u>     | 0 | 0 | 0 | 0 | 0 | 0 | 1 | 0 | 0 | 0 | 1 |
| <u>KCNIP3</u>    | 0 | 0 | 0 | 0 | 0 | 0 | 1 | 0 | 0 | 0 | 1 |
| <u>C8orf33</u>   | 0 | 0 | 0 | 0 | 0 | 0 | 1 | 0 | 0 | 0 | 1 |
| <u>SEPT4</u>     | 0 | 0 | 0 | 0 | 0 | 0 | 1 | 0 | 0 | 0 | 1 |
| <u>PCDHGC5</u>   | 0 | 0 | 0 | 0 | 0 | 0 | 1 | 0 | 0 | 0 | 1 |
| <u>IKZF1</u>     | 0 | 0 | 0 | 0 | 0 | 0 | 1 | 0 | 0 | 0 | 1 |
| <u>MYCL1</u>     | 0 | 0 | 0 | 0 | 0 | 0 | 1 | 0 | 0 | 0 | 1 |
| <u>EGR4</u>      | 0 | 0 | 0 | 0 | 0 | 0 | 1 | 0 | 0 | 0 | 1 |

|                  |   |   |   |   |   |   |   |   |   |   |   |
|------------------|---|---|---|---|---|---|---|---|---|---|---|
| <u>RAP1GAP</u>   | 0 | 0 | 0 | 0 | 0 | 0 | 1 | 0 | 0 | 0 | 1 |
| <u>F7</u>        | 0 | 0 | 0 | 0 | 0 | 0 | 1 | 0 | 0 | 0 | 1 |
| <u>TPM3</u>      | 0 | 0 | 0 | 0 | 0 | 0 | 1 | 0 | 0 | 0 | 1 |
| <u>XPC</u>       | 0 | 0 | 0 | 0 | 0 | 0 | 1 | 0 | 0 | 0 | 1 |
| <u>TACSTD2</u>   | 0 | 0 | 0 | 0 | 0 | 0 | 1 | 0 | 0 | 0 | 1 |
| <u>AQP11</u>     | 0 | 0 | 0 | 0 | 0 | 0 | 1 | 0 | 0 | 0 | 1 |
| <u>EPHB3</u>     | 0 | 0 | 0 | 0 | 0 | 0 | 1 | 0 | 0 | 0 | 1 |
| <u>TMEM39A</u>   | 0 | 0 | 0 | 0 | 0 | 0 | 1 | 0 | 0 | 0 | 1 |
| <u>KLF10</u>     | 0 | 0 | 0 | 0 | 0 | 0 | 1 | 0 | 0 | 0 | 1 |
| <u>ICAM1</u>     | 0 | 0 | 0 | 0 | 0 | 0 | 1 | 0 | 0 | 0 | 1 |
| <u>SYT13</u>     | 0 | 0 | 0 | 0 | 0 | 0 | 1 | 0 | 0 | 0 | 1 |
| <u>FLJ21865</u>  | 0 | 0 | 0 | 0 | 0 | 0 | 1 | 0 | 0 | 0 | 1 |
| <u>CCDC13</u>    | 0 | 0 | 0 | 0 | 0 | 0 | 1 | 0 | 0 | 0 | 1 |
| <u>NAT9</u>      | 0 | 0 | 0 | 0 | 0 | 0 | 1 | 0 | 0 | 0 | 1 |
| <u>CAPN3</u>     | 0 | 0 | 0 | 0 | 0 | 0 | 1 | 0 | 0 | 0 | 1 |
| <u>C13orf33</u>  | 0 | 0 | 0 | 0 | 0 | 0 | 1 | 0 | 0 | 0 | 1 |
| <u>HN1</u>       | 0 | 0 | 0 | 0 | 0 | 0 | 1 | 0 | 0 | 0 | 1 |
| <u>ITFG1</u>     | 0 | 0 | 0 | 0 | 0 | 0 | 1 | 0 | 0 | 0 | 1 |
| <u>COMMD3</u>    | 0 | 0 | 0 | 0 | 0 | 0 | 1 | 0 | 0 | 0 | 1 |
| <u>RNF122</u>    | 0 | 0 | 0 | 0 | 0 | 0 | 1 | 0 | 0 | 0 | 1 |
| <u>PARL</u>      | 0 | 0 | 0 | 0 | 0 | 0 | 1 | 0 | 0 | 0 | 1 |
| <u>C20orf107</u> | 0 | 0 | 0 | 0 | 0 | 0 | 1 | 0 | 0 | 0 | 1 |
| <u>GAS2L1</u>    | 0 | 0 | 0 | 0 | 0 | 0 | 1 | 0 | 0 | 0 | 1 |
| <u>C2orf44</u>   | 0 | 0 | 0 | 0 | 0 | 0 | 1 | 0 | 0 | 0 | 1 |
| <u>LUM</u>       | 0 | 0 | 0 | 0 | 0 | 0 | 1 | 0 | 0 | 0 | 1 |
| <u>ADAMTS16</u>  | 0 | 0 | 0 | 0 | 0 | 0 | 1 | 0 | 0 | 0 | 1 |
| <u>OMD</u>       | 0 | 0 | 0 | 0 | 0 | 0 | 1 | 0 | 0 | 0 | 1 |
| <u>TERF2IP</u>   | 0 | 0 | 0 | 0 | 0 | 0 | 1 | 0 | 0 | 0 | 1 |
| <u>ZNF783</u>    | 0 | 0 | 0 | 0 | 0 | 0 | 1 | 0 | 0 | 0 | 1 |
| <u>FIGF</u>      | 0 | 0 | 0 | 0 | 0 | 0 | 1 | 0 | 0 | 0 | 1 |
| <u>SSX1</u>      | 0 | 0 | 0 | 0 | 0 | 0 | 1 | 0 | 0 | 0 | 1 |
| <u>C7orf49</u>   | 0 | 0 | 0 | 0 | 0 | 0 | 1 | 0 | 0 | 0 | 1 |
| <u>TNRC6A</u>    | 0 | 0 | 0 | 0 | 0 | 0 | 1 | 0 | 0 | 0 | 1 |
| <u>SAPS1</u>     | 0 | 0 | 0 | 0 | 0 | 0 | 1 | 0 | 0 | 0 | 1 |
| <u>ZNF763</u>    | 0 | 0 | 0 | 0 | 0 | 0 | 1 | 0 | 0 | 0 | 1 |
| <u>MBL2</u>      | 0 | 0 | 0 | 0 | 0 | 0 | 1 | 0 | 0 | 0 | 1 |
| <u>IHH</u>       | 0 | 0 | 0 | 0 | 0 | 0 | 1 | 0 | 0 | 0 | 1 |
| <u>ATCAY</u>     | 0 | 0 | 0 | 0 | 0 | 0 | 1 | 0 | 0 | 0 | 1 |
| <u>RFFL</u>      | 0 | 0 | 0 | 0 | 0 | 0 | 1 | 0 | 0 | 0 | 1 |
| <u>SLCO2A1</u>   | 0 | 0 | 0 | 0 | 0 | 0 | 1 | 0 | 0 | 0 | 1 |
| <u>KIAA0495</u>  | 0 | 0 | 0 | 0 | 0 | 0 | 1 | 0 | 0 | 0 | 1 |

|           |   |   |   |   |   |   |   |   |   |   |   |
|-----------|---|---|---|---|---|---|---|---|---|---|---|
| NF2       | 0 | 0 | 0 | 0 | 0 | 0 | 1 | 0 | 0 | 0 | 1 |
| CRAMP1L   | 0 | 0 | 0 | 0 | 0 | 0 | 1 | 0 | 0 | 0 | 1 |
| TERT      | 0 | 0 | 0 | 0 | 0 | 0 | 1 | 0 | 0 | 0 | 1 |
| SLC27A1   | 0 | 0 | 0 | 0 | 0 | 0 | 1 | 0 | 0 | 0 | 1 |
| GRB2      | 0 | 0 | 0 | 0 | 0 | 0 | 1 | 0 | 0 | 0 | 1 |
| KIAA1305  | 0 | 0 | 0 | 0 | 0 | 0 | 1 | 0 | 0 | 0 | 1 |
| RND2      | 0 | 0 | 0 | 0 | 0 | 0 | 1 | 0 | 0 | 0 | 1 |
| STAT2     | 0 | 0 | 0 | 0 | 0 | 0 | 1 | 0 | 0 | 0 | 1 |
| MTA2      | 0 | 0 | 0 | 0 | 0 | 0 | 1 | 0 | 0 | 0 | 1 |
| TNFAIP3   | 0 | 0 | 0 | 0 | 0 | 0 | 1 | 0 | 0 | 0 | 1 |
| KCTD17    | 0 | 0 | 0 | 0 | 0 | 0 | 1 | 0 | 0 | 0 | 1 |
| C21orf29  | 0 | 0 | 0 | 0 | 0 | 0 | 1 | 0 | 0 | 0 | 1 |
| NDUFA6    | 0 | 0 | 0 | 0 | 0 | 0 | 1 | 0 | 0 | 0 | 1 |
| SEC24D    | 0 | 0 | 0 | 0 | 0 | 0 | 1 | 0 | 0 | 0 | 1 |
| SNRK      | 0 | 0 | 0 | 0 | 0 | 0 | 1 | 0 | 0 | 0 | 1 |
| C19orf52  | 0 | 0 | 0 | 0 | 0 | 0 | 1 | 0 | 0 | 0 | 1 |
| RELT      | 0 | 0 | 0 | 0 | 0 | 0 | 1 | 0 | 0 | 0 | 1 |
| MPEG1     | 0 | 0 | 0 | 0 | 0 | 0 | 1 | 0 | 0 | 0 | 1 |
| BTNL8     | 0 | 0 | 0 | 0 | 0 | 0 | 1 | 0 | 0 | 0 | 1 |
| HNRPM     | 0 | 0 | 0 | 0 | 0 | 0 | 1 | 0 | 0 | 0 | 1 |
| PPFIA4    | 0 | 0 | 0 | 0 | 0 | 0 | 1 | 0 | 0 | 0 | 1 |
| PRR12     | 0 | 0 | 0 | 0 | 0 | 0 | 1 | 0 | 0 | 0 | 1 |
| BXDC5     | 0 | 0 | 0 | 0 | 0 | 0 | 1 | 0 | 0 | 0 | 1 |
| C14orf147 | 0 | 0 | 0 | 0 | 0 | 0 | 1 | 0 | 0 | 0 | 1 |
| CPLX2     | 0 | 0 | 0 | 0 | 0 | 0 | 1 | 0 | 0 | 0 | 1 |
| SH3BGRL   | 0 | 0 | 0 | 0 | 0 | 0 | 1 | 0 | 0 | 0 | 1 |
| BGLAP     | 0 | 0 | 0 | 0 | 0 | 0 | 1 | 0 | 0 | 0 | 1 |
| TUBB1     | 0 | 0 | 0 | 0 | 0 | 0 | 1 | 0 | 0 | 0 | 1 |
| PTBP1     | 0 | 0 | 0 | 0 | 0 | 0 | 1 | 0 | 0 | 0 | 1 |
| PLAC4     | 0 | 0 | 0 | 0 | 0 | 0 | 1 | 0 | 0 | 0 | 1 |
| TARS2     | 0 | 0 | 0 | 0 | 0 | 0 | 1 | 0 | 0 | 0 | 1 |
| GPATCH4   | 0 | 0 | 0 | 0 | 0 | 0 | 1 | 0 | 0 | 0 | 1 |
| BTN3A3    | 0 | 0 | 0 | 0 | 0 | 0 | 1 | 0 | 0 | 0 | 1 |
| KLF16     | 0 | 0 | 0 | 0 | 0 | 0 | 1 | 0 | 0 | 0 | 1 |
| P11       | 0 | 0 | 0 | 0 | 0 | 0 | 1 | 0 | 0 | 0 | 1 |
| NFASC     | 0 | 0 | 0 | 0 | 0 | 0 | 1 | 0 | 0 | 0 | 1 |
| TMEM8     | 0 | 0 | 0 | 0 | 0 | 0 | 1 | 0 | 0 | 0 | 1 |
| VPS18     | 0 | 0 | 0 | 0 | 0 | 0 | 1 | 0 | 0 | 0 | 1 |
| DEDD2     | 0 | 0 | 0 | 0 | 0 | 0 | 1 | 0 | 0 | 0 | 1 |
| VPS11     | 0 | 0 | 0 | 0 | 0 | 0 | 1 | 0 | 0 | 0 | 1 |
| ODAM      | 0 | 0 | 0 | 0 | 0 | 0 | 1 | 0 | 0 | 0 | 1 |



|                  |   |   |   |   |   |   |   |   |   |   |   |
|------------------|---|---|---|---|---|---|---|---|---|---|---|
| <u>HNT</u>       | 0 | 0 | 0 | 0 | 0 | 0 | 1 | 0 | 0 | 0 | 1 |
| <u>FAM53C</u>    | 0 | 0 | 0 | 0 | 0 | 0 | 1 | 0 | 0 | 0 | 1 |
| <u>AARS2</u>     | 0 | 0 | 0 | 0 | 0 | 0 | 1 | 0 | 0 | 0 | 1 |
| <u>C14orf105</u> | 0 | 0 | 0 | 0 | 0 | 0 | 1 | 0 | 0 | 0 | 1 |
| <u>POLD3</u>     | 0 | 0 | 0 | 0 | 0 | 0 | 1 | 0 | 0 | 0 | 1 |
| <u>C5orf24</u>   | 0 | 0 | 0 | 0 | 0 | 0 | 1 | 0 | 0 | 0 | 1 |
| <u>GFI1</u>      | 0 | 0 | 0 | 0 | 0 | 0 | 1 | 0 | 0 | 0 | 1 |
| <u>AFAP1L2</u>   | 0 | 0 | 0 | 0 | 0 | 0 | 1 | 0 | 0 | 0 | 1 |
| <u>PPCDC</u>     | 0 | 0 | 0 | 0 | 0 | 0 | 1 | 0 | 0 | 0 | 1 |
| <u>EDARADD</u>   | 0 | 0 | 0 | 0 | 0 | 0 | 1 | 0 | 0 | 0 | 1 |
| <u>MGC16385</u>  | 0 | 0 | 0 | 0 | 0 | 0 | 1 | 0 | 0 | 0 | 1 |
| <u>MTP18</u>     | 0 | 0 | 0 | 0 | 0 | 0 | 1 | 0 | 0 | 0 | 1 |
| <u>GNAI2</u>     | 0 | 0 | 0 | 0 | 0 | 0 | 1 | 0 | 0 | 0 | 1 |
| <u>MMD2</u>      | 0 | 0 | 0 | 0 | 0 | 0 | 1 | 0 | 0 | 0 | 1 |
| <u>BEST1</u>     | 0 | 0 | 0 | 0 | 0 | 0 | 1 | 0 | 0 | 0 | 1 |
| <u>NFATC3</u>    | 0 | 0 | 0 | 0 | 0 | 0 | 1 | 0 | 0 | 0 | 1 |
| <u>SGCG</u>      | 0 | 0 | 0 | 0 | 0 | 0 | 1 | 0 | 0 | 0 | 1 |
| <u>TBC1D24</u>   | 0 | 0 | 0 | 0 | 0 | 0 | 1 | 0 | 0 | 0 | 1 |
| <u>PLA2G3</u>    | 0 | 0 | 0 | 0 | 0 | 0 | 1 | 0 | 0 | 0 | 1 |
| <u>MAPK10</u>    | 0 | 0 | 0 | 0 | 0 | 0 | 1 | 0 | 0 | 0 | 1 |
| <u>SUMF2</u>     | 0 | 0 | 0 | 0 | 0 | 0 | 1 | 0 | 0 | 0 | 1 |
| <u>TNK2</u>      | 0 | 0 | 0 | 0 | 0 | 0 | 1 | 0 | 0 | 0 | 1 |
| <u>SEMA3F</u>    | 0 | 0 | 0 | 0 | 0 | 0 | 1 | 0 | 0 | 0 | 1 |
| <u>GTPBP4</u>    | 0 | 0 | 0 | 0 | 0 | 0 | 1 | 0 | 0 | 0 | 1 |
| <u>PHF23</u>     | 0 | 0 | 0 | 0 | 0 | 0 | 1 | 0 | 0 | 0 | 1 |
| <u>LOC51057</u>  | 0 | 0 | 0 | 0 | 0 | 0 | 1 | 0 | 0 | 0 | 1 |
| <u>ETNK2</u>     | 0 | 0 | 0 | 0 | 0 | 0 | 1 | 0 | 0 | 0 | 1 |
| <u>C16orf5</u>   | 0 | 0 | 0 | 0 | 0 | 0 | 1 | 0 | 0 | 0 | 1 |
| <u>FXR2</u>      | 0 | 0 | 0 | 0 | 0 | 0 | 1 | 0 | 0 | 0 | 1 |
| <u>SIGLEC11</u>  | 0 | 0 | 0 | 0 | 0 | 0 | 1 | 0 | 0 | 0 | 1 |
| <u>LRRC7</u>     | 0 | 0 | 0 | 0 | 0 | 0 | 1 | 0 | 0 | 0 | 1 |
| <u>THSD7A</u>    | 0 | 0 | 0 | 0 | 0 | 0 | 1 | 0 | 0 | 0 | 1 |
| <u>SCNN1G</u>    | 0 | 0 | 0 | 0 | 0 | 0 | 1 | 0 | 0 | 0 | 1 |
| <u>C11orf68</u>  | 0 | 0 | 0 | 0 | 0 | 0 | 1 | 0 | 0 | 0 | 1 |
| <u>DSCAM</u>     | 0 | 0 | 0 | 0 | 0 | 0 | 1 | 0 | 0 | 0 | 1 |
| <u>LOC401052</u> | 0 | 0 | 0 | 0 | 0 | 0 | 1 | 0 | 0 | 0 | 1 |
| <u>CD209</u>     | 0 | 0 | 0 | 0 | 0 | 0 | 1 | 0 | 0 | 0 | 1 |
| <u>ORC5L</u>     | 0 | 0 | 0 | 0 | 0 | 0 | 1 | 0 | 0 | 0 | 1 |
| <u>PPP3CA</u>    | 0 | 0 | 0 | 0 | 0 | 0 | 1 | 0 | 0 | 0 | 1 |
| <u>C9orf125</u>  | 0 | 0 | 0 | 0 | 0 | 0 | 1 | 0 | 0 | 0 | 1 |
| <u>NHLH1</u>     | 0 | 0 | 0 | 0 | 0 | 0 | 1 | 0 | 0 | 0 | 1 |

|                 |   |   |   |   |   |   |   |   |   |   |   |
|-----------------|---|---|---|---|---|---|---|---|---|---|---|
| <u>CHD1L</u>    | 0 | 0 | 0 | 0 | 0 | 0 | 1 | 0 | 0 | 0 | 1 |
| <u>BRF1</u>     | 0 | 0 | 0 | 0 | 0 | 0 | 1 | 0 | 0 | 0 | 1 |
| <u>ETV5</u>     | 0 | 0 | 0 | 0 | 0 | 0 | 1 | 0 | 0 | 0 | 1 |
| <u>FIBP</u>     | 0 | 0 | 0 | 0 | 0 | 0 | 1 | 0 | 0 | 0 | 1 |
| <u>FAM134A</u>  | 0 | 0 | 0 | 0 | 0 | 0 | 1 | 0 | 0 | 0 | 1 |
| <u>ECHDC1</u>   | 0 | 0 | 0 | 0 | 0 | 0 | 1 | 0 | 0 | 0 | 1 |
| <u>YME1L1</u>   | 0 | 0 | 0 | 0 | 0 | 0 | 1 | 0 | 0 | 0 | 1 |
| <u>SLC7A5</u>   | 0 | 0 | 0 | 0 | 0 | 0 | 1 | 0 | 0 | 0 | 1 |
| <u>CR2</u>      | 0 | 0 | 0 | 0 | 0 | 0 | 1 | 0 | 0 | 0 | 1 |
| <u>KRT85</u>    | 0 | 0 | 0 | 0 | 0 | 0 | 1 | 0 | 0 | 0 | 1 |
| <u>SSTR1</u>    | 0 | 0 | 0 | 0 | 0 | 0 | 1 | 0 | 0 | 0 | 1 |
| <u>ARID4A</u>   | 0 | 0 | 0 | 0 | 0 | 0 | 1 | 0 | 0 | 0 | 1 |
| <u>CEP55</u>    | 0 | 0 | 0 | 0 | 0 | 0 | 1 | 0 | 0 | 0 | 1 |
| <u>ARF4</u>     | 0 | 0 | 0 | 0 | 0 | 0 | 1 | 0 | 0 | 0 | 1 |
| <u>PELI2</u>    | 0 | 0 | 0 | 0 | 0 | 0 | 1 | 0 | 0 | 0 | 1 |
| <u>APOL2</u>    | 0 | 0 | 0 | 0 | 0 | 0 | 1 | 0 | 0 | 0 | 1 |
| <u>BTN3A2</u>   | 0 | 0 | 0 | 0 | 0 | 0 | 1 | 0 | 0 | 0 | 1 |
| <u>SYT12</u>    | 0 | 0 | 0 | 0 | 0 | 0 | 1 | 0 | 0 | 0 | 1 |
| <u>CCDC49</u>   | 0 | 0 | 0 | 0 | 0 | 0 | 1 | 0 | 0 | 0 | 1 |
| <u>UXS1</u>     | 0 | 0 | 0 | 0 | 0 | 0 | 1 | 0 | 0 | 0 | 1 |
| <u>ZNF235</u>   | 0 | 0 | 0 | 0 | 0 | 0 | 1 | 0 | 0 | 0 | 1 |
| <u>TCEB3B</u>   | 0 | 0 | 0 | 0 | 0 | 0 | 1 | 0 | 0 | 0 | 1 |
| <u>TMBIM1</u>   | 0 | 0 | 0 | 0 | 0 | 0 | 1 | 0 | 0 | 0 | 1 |
| <u>C17orf62</u> | 0 | 0 | 0 | 0 | 0 | 0 | 1 | 0 | 0 | 0 | 1 |
| <u>FNTA</u>     | 0 | 0 | 0 | 0 | 0 | 0 | 1 | 0 | 0 | 0 | 1 |
| <u>FOXI1</u>    | 0 | 0 | 0 | 0 | 0 | 0 | 1 | 0 | 0 | 0 | 1 |
| <u>DAP</u>      | 0 | 0 | 0 | 0 | 0 | 0 | 1 | 0 | 0 | 0 | 1 |
| <u>ZNF304</u>   | 0 | 0 | 0 | 0 | 0 | 0 | 1 | 0 | 0 | 0 | 1 |
| <u>ANKS6</u>    | 0 | 0 | 0 | 0 | 0 | 0 | 1 | 0 | 0 | 0 | 1 |
| <u>SFRS2</u>    | 0 | 0 | 0 | 0 | 0 | 0 | 1 | 0 | 0 | 0 | 1 |
| <u>SLC41A1</u>  | 0 | 0 | 0 | 0 | 0 | 0 | 1 | 0 | 0 | 0 | 1 |
| <u>TPR</u>      | 0 | 0 | 0 | 0 | 0 | 0 | 1 | 0 | 0 | 0 | 1 |
| <u>PDS5A</u>    | 0 | 0 | 0 | 0 | 0 | 0 | 1 | 0 | 0 | 0 | 1 |
| <u>FAT2</u>     | 0 | 0 | 0 | 0 | 0 | 0 | 1 | 0 | 0 | 0 | 1 |
| <u>NODAL</u>    | 0 | 0 | 0 | 0 | 0 | 0 | 1 | 0 | 0 | 0 | 1 |
| <u>SAP30</u>    | 0 | 0 | 0 | 0 | 0 | 0 | 1 | 0 | 0 | 0 | 1 |
| <u>ZNF596</u>   | 0 | 0 | 0 | 0 | 0 | 0 | 1 | 0 | 0 | 0 | 1 |
| <u>CCDC77</u>   | 0 | 0 | 0 | 0 | 0 | 0 | 1 | 0 | 0 | 0 | 1 |
| <u>AIG1</u>     | 0 | 0 | 0 | 0 | 0 | 0 | 1 | 0 | 0 | 0 | 1 |
| <u>ZNF146</u>   | 0 | 0 | 0 | 0 | 0 | 0 | 1 | 0 | 0 | 0 | 1 |
| <u>SFPO</u>     | 0 | 0 | 0 | 0 | 0 | 0 | 1 | 0 | 0 | 0 | 1 |

|                 |   |   |   |   |   |   |   |   |   |   |   |
|-----------------|---|---|---|---|---|---|---|---|---|---|---|
| <u>RBM12</u>    | 0 | 0 | 0 | 0 | 0 | 0 | 1 | 0 | 0 | 0 | 1 |
| <u>PACS1</u>    | 0 | 0 | 0 | 0 | 0 | 0 | 1 | 0 | 0 | 0 | 1 |
| <u>C20orf11</u> | 0 | 0 | 0 | 0 | 0 | 0 | 1 | 0 | 0 | 0 | 1 |
| <u>GPR115</u>   | 0 | 0 | 0 | 0 | 0 | 0 | 1 | 0 | 0 | 0 | 1 |
| <u>ACTG1</u>    | 0 | 0 | 0 | 0 | 0 | 0 | 1 | 0 | 0 | 0 | 1 |
| <u>CLDN2</u>    | 0 | 0 | 0 | 0 | 0 | 0 | 1 | 0 | 0 | 0 | 1 |
| <u>PRKAR1B</u>  | 0 | 0 | 0 | 0 | 0 | 0 | 1 | 0 | 0 | 0 | 1 |
| <u>IL18</u>     | 0 | 0 | 0 | 0 | 0 | 0 | 1 | 0 | 0 | 0 | 1 |
| <u>PCDH21</u>   | 0 | 0 | 0 | 0 | 0 | 0 | 1 | 0 | 0 | 0 | 1 |
| <u>ASB9</u>     | 0 | 0 | 0 | 0 | 0 | 0 | 1 | 0 | 0 | 0 | 1 |
| <u>PCDHGB5</u>  | 0 | 0 | 0 | 0 | 0 | 0 | 1 | 0 | 0 | 0 | 1 |
| <u>MAP3K7</u>   | 0 | 0 | 0 | 0 | 0 | 0 | 1 | 0 | 0 | 0 | 1 |
| <u>PNPLA1</u>   | 0 | 0 | 0 | 0 | 0 | 0 | 1 | 0 | 0 | 0 | 1 |
| <u>LRRC3</u>    | 0 | 0 | 0 | 0 | 0 | 0 | 1 | 0 | 0 | 0 | 1 |
| <u>TMEM98</u>   | 0 | 0 | 0 | 0 | 0 | 0 | 1 | 0 | 0 | 0 | 1 |
| <u>SEPT9</u>    | 0 | 0 | 0 | 0 | 0 | 0 | 1 | 0 | 0 | 0 | 1 |
| <u>PEX11B</u>   | 0 | 0 | 0 | 0 | 0 | 0 | 1 | 0 | 0 | 0 | 1 |
| <u>IL22</u>     | 0 | 0 | 0 | 0 | 0 | 0 | 1 | 0 | 0 | 0 | 1 |
| <u>TRMT6</u>    | 0 | 0 | 0 | 0 | 0 | 0 | 1 | 0 | 0 | 0 | 1 |
| <u>ZNF324B</u>  | 0 | 0 | 0 | 0 | 0 | 0 | 1 | 0 | 0 | 0 | 1 |
| <u>C17orf85</u> | 0 | 0 | 0 | 0 | 0 | 0 | 1 | 0 | 0 | 0 | 1 |
| <u>FLJ20184</u> | 0 | 0 | 0 | 0 | 0 | 0 | 1 | 0 | 0 | 0 | 1 |
| <u>KIFC2</u>    | 0 | 0 | 0 | 0 | 0 | 0 | 1 | 0 | 0 | 0 | 1 |
| <u>FTO</u>      | 0 | 0 | 0 | 0 | 0 | 0 | 1 | 0 | 0 | 0 | 1 |
| <u>GPR45</u>    | 0 | 0 | 0 | 0 | 0 | 0 | 1 | 0 | 0 | 0 | 1 |
| <u>DGAT2</u>    | 0 | 0 | 0 | 0 | 0 | 0 | 1 | 0 | 0 | 0 | 1 |
| <u>FAM19A1</u>  | 0 | 0 | 0 | 0 | 0 | 0 | 1 | 0 | 0 | 0 | 1 |
| <u>FBXL19</u>   | 0 | 0 | 0 | 0 | 0 | 0 | 1 | 0 | 0 | 0 | 1 |
| <u>FGD6</u>     | 0 | 0 | 0 | 0 | 0 | 0 | 1 | 0 | 0 | 0 | 1 |
| <u>SLC1A7</u>   | 0 | 0 | 0 | 0 | 0 | 0 | 1 | 0 | 0 | 0 | 1 |
| <u>TMEM10</u>   | 0 | 0 | 0 | 0 | 0 | 0 | 1 | 0 | 0 | 0 | 1 |
| <u>LIPH</u>     | 0 | 0 | 0 | 0 | 0 | 0 | 1 | 0 | 0 | 0 | 1 |
| <u>PON1</u>     | 0 | 0 | 0 | 0 | 0 | 0 | 1 | 0 | 0 | 0 | 1 |
| <u>LILRB2</u>   | 0 | 0 | 0 | 0 | 0 | 0 | 1 | 0 | 0 | 0 | 1 |
| <u>MBD3</u>     | 0 | 0 | 0 | 0 | 0 | 0 | 1 | 0 | 0 | 0 | 1 |
| <u>MYLK2</u>    | 0 | 0 | 0 | 0 | 0 | 0 | 1 | 0 | 0 | 0 | 1 |
| <u>MB</u>       | 0 | 0 | 0 | 0 | 0 | 0 | 1 | 0 | 0 | 0 | 1 |
| <u>TSKU</u>     | 0 | 0 | 0 | 0 | 0 | 0 | 1 | 0 | 0 | 0 | 1 |
| <u>ZNF137</u>   | 0 | 0 | 0 | 0 | 0 | 0 | 1 | 0 | 0 | 0 | 1 |
| <u>RAB36</u>    | 0 | 0 | 0 | 0 | 0 | 0 | 1 | 0 | 0 | 0 | 1 |
| <u>TBX5</u>     | 0 | 0 | 0 | 0 | 0 | 0 | 1 | 0 | 0 | 0 | 1 |

|                 |   |   |   |   |   |   |   |   |   |   |   |
|-----------------|---|---|---|---|---|---|---|---|---|---|---|
| <u>NUAK1</u>    | 0 | 0 | 0 | 0 | 0 | 0 | 1 | 0 | 0 | 0 | 1 |
| <u>PDE4C</u>    | 0 | 0 | 0 | 0 | 0 | 0 | 1 | 0 | 0 | 0 | 1 |
| <u>TUSC1</u>    | 0 | 0 | 0 | 0 | 0 | 0 | 1 | 0 | 0 | 0 | 1 |
| <u>SPCS3</u>    | 0 | 0 | 0 | 0 | 0 | 0 | 1 | 0 | 0 | 0 | 1 |
| <u>S100A16</u>  | 0 | 0 | 0 | 0 | 0 | 0 | 1 | 0 | 0 | 0 | 1 |
| <u>PRAMEF12</u> | 0 | 0 | 0 | 0 | 0 | 0 | 1 | 0 | 0 | 0 | 1 |
| <u>POR</u>      | 0 | 0 | 0 | 0 | 0 | 0 | 1 | 0 | 0 | 0 | 1 |
| <u>GPRASP1</u>  | 0 | 0 | 0 | 0 | 0 | 0 | 1 | 0 | 0 | 0 | 1 |
| <u>TRIM48</u>   | 0 | 0 | 0 | 0 | 0 | 0 | 1 | 0 | 0 | 0 | 1 |
| <u>NUDT11</u>   | 0 | 0 | 0 | 0 | 0 | 0 | 1 | 0 | 0 | 0 | 1 |
| <u>C1orf150</u> | 0 | 0 | 0 | 0 | 0 | 0 | 1 | 0 | 0 | 0 | 1 |
| <u>CRTC1</u>    | 0 | 0 | 0 | 0 | 0 | 0 | 1 | 0 | 0 | 0 | 1 |
| <u>EVC</u>      | 0 | 0 | 0 | 0 | 0 | 0 | 1 | 0 | 0 | 0 | 1 |
| <u>MYOT</u>     | 0 | 0 | 0 | 0 | 0 | 0 | 1 | 0 | 0 | 0 | 1 |
| <u>ELFN2</u>    | 0 | 0 | 0 | 0 | 0 | 0 | 1 | 0 | 0 | 0 | 1 |
| <u>TXNDC6</u>   | 0 | 0 | 0 | 0 | 0 | 0 | 1 | 0 | 0 | 0 | 1 |
| <u>TOMM40L</u>  | 0 | 0 | 0 | 0 | 0 | 0 | 1 | 0 | 0 | 0 | 1 |
| <u>MLZE</u>     | 0 | 0 | 0 | 0 | 0 | 0 | 1 | 0 | 0 | 0 | 1 |
| <u>PCDHGB7</u>  | 0 | 0 | 0 | 0 | 0 | 0 | 1 | 0 | 0 | 0 | 1 |
| <u>CLCNKB</u>   | 0 | 0 | 0 | 0 | 0 | 0 | 1 | 0 | 0 | 0 | 1 |
| <u>UBE2D2</u>   | 0 | 0 | 0 | 0 | 0 | 0 | 1 | 0 | 0 | 0 | 1 |
| <u>ADORA3</u>   | 0 | 0 | 0 | 0 | 0 | 0 | 1 | 0 | 0 | 0 | 1 |
| <u>HTR2A</u>    | 0 | 0 | 0 | 0 | 0 | 0 | 1 | 0 | 0 | 0 | 1 |
| <u>MGMT</u>     | 0 | 0 | 0 | 0 | 0 | 0 | 1 | 0 | 0 | 0 | 1 |
| <u>TMEM189</u>  | 0 | 0 | 0 | 0 | 0 | 0 | 1 | 0 | 0 | 0 | 1 |
| <u>ALS2CL</u>   | 0 | 0 | 0 | 0 | 0 | 0 | 1 | 0 | 0 | 0 | 1 |
| <u>MATN1</u>    | 0 | 0 | 0 | 0 | 0 | 0 | 1 | 0 | 0 | 0 | 1 |
| <u>INA</u>      | 0 | 0 | 0 | 0 | 0 | 0 | 1 | 0 | 0 | 0 | 1 |
| <u>TCL1B</u>    | 0 | 0 | 0 | 0 | 0 | 0 | 1 | 0 | 0 | 0 | 1 |
| <u>GALNT13</u>  | 0 | 0 | 0 | 0 | 0 | 0 | 1 | 0 | 0 | 0 | 1 |
| <u>TRIM11</u>   | 0 | 0 | 0 | 0 | 0 | 0 | 1 | 0 | 0 | 0 | 1 |
| <u>PDK2</u>     | 0 | 0 | 0 | 0 | 0 | 0 | 1 | 0 | 0 | 0 | 1 |
| <u>SUV39H2</u>  | 0 | 0 | 0 | 0 | 0 | 0 | 1 | 0 | 0 | 0 | 1 |
| <u>PCDHGC4</u>  | 0 | 0 | 0 | 0 | 0 | 0 | 1 | 0 | 0 | 0 | 1 |
| <u>TMOD1</u>    | 0 | 0 | 0 | 0 | 0 | 0 | 1 | 0 | 0 | 0 | 1 |
| <u>MAF1</u>     | 0 | 0 | 0 | 0 | 0 | 0 | 1 | 0 | 0 | 0 | 1 |
| <u>SP140</u>    | 0 | 0 | 0 | 0 | 0 | 0 | 1 | 0 | 0 | 0 | 1 |
| <u>WIPI2</u>    | 0 | 0 | 0 | 0 | 0 | 0 | 1 | 0 | 0 | 0 | 1 |
| <u>RGS14</u>    | 0 | 0 | 0 | 0 | 0 | 0 | 1 | 0 | 0 | 0 | 1 |
| <u>AXUD1</u>    | 0 | 0 | 0 | 0 | 0 | 0 | 1 | 0 | 0 | 0 | 1 |
| <u>OPCML</u>    | 0 | 0 | 0 | 0 | 0 | 0 | 1 | 0 | 0 | 0 | 1 |

|                 |   |   |   |   |   |   |   |   |   |   |   |
|-----------------|---|---|---|---|---|---|---|---|---|---|---|
| <u>PSMA8</u>    | 0 | 0 | 0 | 0 | 0 | 0 | 1 | 0 | 0 | 0 | 1 |
| <u>ATP6V0E2</u> | 0 | 0 | 0 | 0 | 0 | 0 | 1 | 0 | 0 | 0 | 1 |
| <u>ACCS</u>     | 0 | 0 | 0 | 0 | 0 | 0 | 1 | 0 | 0 | 0 | 1 |
| <u>TBC1D12</u>  | 0 | 0 | 0 | 0 | 0 | 0 | 1 | 0 | 0 | 0 | 1 |
| <u>KIAA1539</u> | 0 | 0 | 0 | 0 | 0 | 0 | 1 | 0 | 0 | 0 | 1 |
| <u>UBE2L6</u>   | 0 | 0 | 0 | 0 | 0 | 0 | 1 | 0 | 0 | 0 | 1 |
| <u>MYT1L</u>    | 0 | 0 | 0 | 0 | 0 | 0 | 1 | 0 | 0 | 0 | 1 |
| <u>HACE1</u>    | 0 | 0 | 0 | 0 | 0 | 0 | 1 | 0 | 0 | 0 | 1 |
| <u>C19orf44</u> | 0 | 0 | 0 | 0 | 0 | 0 | 1 | 0 | 0 | 0 | 1 |
| <u>ANKRD13A</u> | 0 | 0 | 0 | 0 | 0 | 0 | 1 | 0 | 0 | 0 | 1 |
| <u>TEX14</u>    | 0 | 0 | 0 | 0 | 0 | 0 | 1 | 0 | 0 | 0 | 1 |
| <u>ARFGAP1</u>  | 0 | 0 | 0 | 0 | 0 | 0 | 1 | 0 | 0 | 0 | 1 |
| <u>SLC39A9</u>  | 0 | 0 | 0 | 0 | 0 | 0 | 1 | 0 | 0 | 0 | 1 |
| <u>GP6</u>      | 0 | 0 | 0 | 0 | 0 | 0 | 1 | 0 | 0 | 0 | 1 |
| <u>FAM82A</u>   | 0 | 0 | 0 | 0 | 0 | 0 | 1 | 0 | 0 | 0 | 1 |
| <u>ZNF526</u>   | 0 | 0 | 0 | 0 | 0 | 0 | 1 | 0 | 0 | 0 | 1 |
| <u>ARHGEF4</u>  | 0 | 0 | 0 | 0 | 0 | 0 | 1 | 0 | 0 | 0 | 1 |
| <u>CD3E</u>     | 0 | 0 | 0 | 0 | 0 | 0 | 1 | 0 | 0 | 0 | 1 |
| <u>CCDC98</u>   | 0 | 0 | 0 | 0 | 0 | 0 | 1 | 0 | 0 | 0 | 1 |
| <u>ZNF671</u>   | 0 | 0 | 0 | 0 | 0 | 0 | 1 | 0 | 0 | 0 | 1 |
| <u>RPS3</u>     | 0 | 0 | 0 | 0 | 0 | 0 | 1 | 0 | 0 | 0 | 1 |
| <u>PTPN11</u>   | 0 | 0 | 0 | 0 | 0 | 0 | 1 | 0 | 0 | 0 | 1 |
| <u>TTC22</u>    | 0 | 0 | 0 | 0 | 0 | 0 | 1 | 0 | 0 | 0 | 1 |
| <u>APOL3</u>    | 0 | 0 | 0 | 0 | 0 | 0 | 1 | 0 | 0 | 0 | 1 |
| <u>AGTRL1</u>   | 0 | 0 | 0 | 0 | 0 | 0 | 1 | 0 | 0 | 0 | 1 |
| <u>C20orf75</u> | 0 | 0 | 0 | 0 | 0 | 0 | 1 | 0 | 0 | 0 | 1 |
| <u>TMEM117</u>  | 0 | 0 | 0 | 0 | 0 | 0 | 1 | 0 | 0 | 0 | 1 |
| <u>CIRBP</u>    | 0 | 0 | 0 | 0 | 0 | 0 | 1 | 0 | 0 | 0 | 1 |
| <u>PDPN</u>     | 0 | 0 | 0 | 0 | 0 | 0 | 1 | 0 | 0 | 0 | 1 |
| <u>SATB2</u>    | 0 | 0 | 0 | 0 | 0 | 0 | 1 | 0 | 0 | 0 | 1 |
| <u>C15orf41</u> | 0 | 0 | 0 | 0 | 0 | 0 | 1 | 0 | 0 | 0 | 1 |
| <u>KCNAB1</u>   | 0 | 0 | 0 | 0 | 0 | 0 | 1 | 0 | 0 | 0 | 1 |
| <u>SCCPDH</u>   | 0 | 0 | 0 | 0 | 0 | 0 | 1 | 0 | 0 | 0 | 1 |
| <u>ARHGAP24</u> | 0 | 0 | 0 | 0 | 0 | 0 | 1 | 0 | 0 | 0 | 1 |
| <u>GNAS</u>     | 0 | 0 | 0 | 0 | 0 | 0 | 1 | 0 | 0 | 0 | 1 |
| <u>KCNV1</u>    | 0 | 0 | 0 | 0 | 0 | 0 | 1 | 0 | 0 | 0 | 1 |
| <u>RNF150</u>   | 0 | 0 | 0 | 0 | 0 | 0 | 1 | 0 | 0 | 0 | 1 |
| <u>L3MBTL2</u>  | 0 | 0 | 0 | 0 | 0 | 0 | 1 | 0 | 0 | 0 | 1 |
| <u>FAM129B</u>  | 0 | 0 | 0 | 0 | 0 | 0 | 1 | 0 | 0 | 0 | 1 |
| <u>DOCK1</u>    | 0 | 0 | 0 | 0 | 0 | 0 | 1 | 0 | 0 | 0 | 1 |
| <u>ELOVL7</u>   | 0 | 0 | 0 | 0 | 0 | 0 | 1 | 0 | 0 | 0 | 1 |

|                 |   |   |   |   |   |   |   |   |   |   |   |
|-----------------|---|---|---|---|---|---|---|---|---|---|---|
| <u>FAM19A4</u>  | 0 | 0 | 0 | 0 | 0 | 0 | 1 | 0 | 0 | 0 | 1 |
| <u>SOX30</u>    | 0 | 0 | 0 | 0 | 0 | 0 | 1 | 0 | 0 | 0 | 1 |
| <u>MAP7D1</u>   | 0 | 0 | 0 | 0 | 0 | 0 | 1 | 0 | 0 | 0 | 1 |
| <u>AURKA</u>    | 0 | 0 | 0 | 0 | 0 | 0 | 1 | 0 | 0 | 0 | 1 |
| <u>SLC6A8</u>   | 0 | 0 | 0 | 0 | 0 | 0 | 1 | 0 | 0 | 0 | 1 |
| <u>SLC6A12</u>  | 0 | 0 | 0 | 0 | 0 | 0 | 1 | 0 | 0 | 0 | 1 |
| <u>GATAD1</u>   | 0 | 0 | 0 | 0 | 0 | 0 | 1 | 0 | 0 | 0 | 1 |
| <u>PPP1R8</u>   | 0 | 0 | 0 | 0 | 0 | 0 | 1 | 0 | 0 | 0 | 1 |
| <u>B3GAT1</u>   | 0 | 0 | 0 | 0 | 0 | 0 | 1 | 0 | 0 | 0 | 1 |
| <u>MYLIP</u>    | 0 | 0 | 0 | 0 | 0 | 0 | 1 | 0 | 0 | 0 | 1 |
| <u>PSMB5</u>    | 0 | 0 | 0 | 0 | 0 | 0 | 1 | 0 | 0 | 0 | 1 |
| <u>TBC1D9B</u>  | 0 | 0 | 0 | 0 | 0 | 0 | 1 | 0 | 0 | 0 | 1 |
| <u>CBLN3</u>    | 0 | 0 | 0 | 0 | 0 | 0 | 1 | 0 | 0 | 0 | 1 |
| <u>EIF1AD</u>   | 0 | 0 | 0 | 0 | 0 | 0 | 1 | 0 | 0 | 0 | 1 |
| <u>NGB</u>      | 0 | 0 | 0 | 0 | 0 | 0 | 1 | 0 | 0 | 0 | 1 |
| <u>LOC93349</u> | 0 | 0 | 0 | 0 | 0 | 0 | 1 | 0 | 0 | 0 | 1 |
| <u>ZNF337</u>   | 0 | 0 | 0 | 0 | 0 | 0 | 1 | 0 | 0 | 0 | 1 |
| <u>PITRM1</u>   | 0 | 0 | 0 | 0 | 0 | 0 | 1 | 0 | 0 | 0 | 1 |
| <u>TCF25</u>    | 0 | 0 | 0 | 0 | 0 | 0 | 1 | 0 | 0 | 0 | 1 |
| <u>TMEM198</u>  | 0 | 0 | 0 | 0 | 0 | 0 | 1 | 0 | 0 | 0 | 1 |
| <u>SCUBE2</u>   | 0 | 0 | 0 | 0 | 0 | 0 | 1 | 0 | 0 | 0 | 1 |
| <u>FCRLB</u>    | 0 | 0 | 0 | 0 | 0 | 0 | 1 | 0 | 0 | 0 | 1 |
| <u>ATP5J</u>    | 0 | 0 | 0 | 0 | 0 | 0 | 1 | 0 | 0 | 0 | 1 |
| <u>ETV1</u>     | 0 | 0 | 0 | 0 | 0 | 0 | 1 | 0 | 0 | 0 | 1 |
| <u>PRPF38B</u>  | 0 | 0 | 0 | 0 | 0 | 0 | 1 | 0 | 0 | 0 | 1 |
| <u>FIS1</u>     | 0 | 0 | 0 | 0 | 0 | 0 | 1 | 0 | 0 | 0 | 1 |
| <u>SDK2</u>     | 0 | 0 | 0 | 0 | 0 | 0 | 1 | 0 | 0 | 0 | 1 |
| <u>ANXA13</u>   | 0 | 0 | 0 | 0 | 0 | 0 | 1 | 0 | 0 | 0 | 1 |
| <u>REN</u>      | 0 | 0 | 0 | 0 | 0 | 0 | 1 | 0 | 0 | 0 | 1 |
| <u>ZFP37</u>    | 0 | 0 | 0 | 0 | 0 | 0 | 1 | 0 | 0 | 0 | 1 |
| <u>PRAGMIN</u>  | 0 | 0 | 0 | 0 | 0 | 0 | 1 | 0 | 0 | 0 | 1 |
| <u>MEGF8</u>    | 0 | 0 | 0 | 0 | 0 | 0 | 1 | 0 | 0 | 0 | 1 |
| <u>RGS20</u>    | 0 | 0 | 0 | 0 | 0 | 0 | 1 | 0 | 0 | 0 | 1 |
| <u>CALCOCO2</u> | 0 | 0 | 0 | 0 | 0 | 0 | 1 | 0 | 0 | 0 | 1 |
| <u>DYRK3</u>    | 0 | 0 | 0 | 0 | 0 | 0 | 1 | 0 | 0 | 0 | 1 |
| <u>KLHDC1</u>   | 0 | 0 | 0 | 0 | 0 | 0 | 1 | 0 | 0 | 0 | 1 |
| <u>SYS1</u>     | 0 | 0 | 0 | 0 | 0 | 0 | 1 | 0 | 0 | 0 | 1 |
| <u>NUB1</u>     | 0 | 0 | 0 | 0 | 0 | 0 | 1 | 0 | 0 | 0 | 1 |
| <u>SPOP</u>     | 0 | 0 | 0 | 0 | 0 | 0 | 1 | 0 | 0 | 0 | 1 |
| <u>KNCN</u>     | 0 | 0 | 0 | 0 | 0 | 0 | 1 | 0 | 0 | 0 | 1 |
| <u>SAE1</u>     | 0 | 0 | 0 | 0 | 0 | 0 | 1 | 0 | 0 | 0 | 1 |

|                  |   |   |   |   |   |   |   |   |   |   |   |
|------------------|---|---|---|---|---|---|---|---|---|---|---|
| <u>PKP1</u>      | 0 | 0 | 0 | 0 | 0 | 0 | 1 | 0 | 0 | 0 | 1 |
| <u>RCC2</u>      | 0 | 0 | 0 | 0 | 0 | 0 | 1 | 0 | 0 | 0 | 1 |
| <u>LOC402665</u> | 0 | 0 | 0 | 0 | 0 | 0 | 1 | 0 | 0 | 0 | 1 |
| <u>SHCBP1</u>    | 0 | 0 | 0 | 0 | 0 | 0 | 1 | 0 | 0 | 0 | 1 |
| <u>GLUD2</u>     | 0 | 0 | 0 | 0 | 0 | 0 | 1 | 0 | 0 | 0 | 1 |
| <u>ELOF1</u>     | 0 | 0 | 0 | 0 | 0 | 0 | 1 | 0 | 0 | 0 | 1 |
| <u>C9orf32</u>   | 0 | 0 | 0 | 0 | 0 | 0 | 1 | 0 | 0 | 0 | 1 |
| <u>HNRPAB</u>    | 0 | 0 | 0 | 0 | 0 | 0 | 1 | 0 | 0 | 0 | 1 |
| <u>MRPS33</u>    | 0 | 0 | 0 | 0 | 0 | 0 | 1 | 0 | 0 | 0 | 1 |
| <u>SLC41A3</u>   | 0 | 0 | 0 | 0 | 0 | 0 | 1 | 0 | 0 | 0 | 1 |
| <u>NGEF</u>      | 0 | 0 | 0 | 0 | 0 | 0 | 1 | 0 | 0 | 0 | 1 |
| <u>ADAMTSL3</u>  | 0 | 0 | 0 | 0 | 0 | 0 | 1 | 0 | 0 | 0 | 1 |
| <u>FRMD4B</u>    | 0 | 0 | 0 | 0 | 0 | 0 | 1 | 0 | 0 | 0 | 1 |
| <u>IL2RA</u>     | 0 | 0 | 0 | 0 | 0 | 0 | 1 | 0 | 0 | 0 | 1 |
| <u>TBX19</u>     | 0 | 0 | 0 | 0 | 0 | 0 | 1 | 0 | 0 | 0 | 1 |
| <u>C11orf72</u>  | 0 | 0 | 0 | 0 | 0 | 0 | 1 | 0 | 0 | 0 | 1 |
| <u>TPCN2</u>     | 0 | 0 | 0 | 0 | 0 | 0 | 1 | 0 | 0 | 0 | 1 |
| <u>HSD3B7</u>    | 0 | 0 | 0 | 0 | 0 | 0 | 1 | 0 | 0 | 0 | 1 |
| <u>ARHGAP9</u>   | 0 | 0 | 0 | 0 | 0 | 0 | 1 | 0 | 0 | 0 | 1 |
| <u>ADCYAP1</u>   | 0 | 0 | 0 | 0 | 0 | 0 | 1 | 0 | 0 | 0 | 1 |
| <u>PRDM7</u>     | 0 | 0 | 0 | 0 | 0 | 0 | 1 | 0 | 0 | 0 | 1 |
| <u>EMILIN3</u>   | 0 | 0 | 0 | 0 | 0 | 0 | 1 | 0 | 0 | 0 | 1 |
| <u>RPP14</u>     | 0 | 0 | 0 | 0 | 0 | 0 | 1 | 0 | 0 | 0 | 1 |
| <u>ENOPH1</u>    | 0 | 0 | 0 | 0 | 0 | 0 | 1 | 0 | 0 | 0 | 1 |
| <u>RIOK1</u>     | 0 | 0 | 0 | 0 | 0 | 0 | 1 | 0 | 0 | 0 | 1 |
| <u>PECAM1</u>    | 0 | 0 | 0 | 0 | 0 | 0 | 1 | 0 | 0 | 0 | 1 |
| <u>STARD7</u>    | 0 | 0 | 0 | 0 | 0 | 0 | 1 | 0 | 0 | 0 | 1 |
| <u>PTGDS</u>     | 0 | 0 | 0 | 0 | 0 | 0 | 1 | 0 | 0 | 0 | 1 |
| <u>AP2A1</u>     | 0 | 0 | 0 | 0 | 0 | 0 | 1 | 0 | 0 | 0 | 1 |
| <u>IVL</u>       | 0 | 0 | 0 | 0 | 0 | 0 | 1 | 0 | 0 | 0 | 1 |
| <u>UBFD1</u>     | 0 | 0 | 0 | 0 | 0 | 0 | 1 | 0 | 0 | 0 | 1 |
| <u>LANCL1</u>    | 0 | 0 | 0 | 0 | 0 | 0 | 1 | 0 | 0 | 0 | 1 |
| <u>LOC728215</u> | 0 | 0 | 0 | 0 | 0 | 0 | 1 | 0 | 0 | 0 | 1 |
| <u>TAOK3</u>     | 0 | 0 | 0 | 0 | 0 | 0 | 1 | 0 | 0 | 0 | 1 |
| <u>ADAM32</u>    | 0 | 0 | 0 | 0 | 0 | 0 | 1 | 0 | 0 | 0 | 1 |
| <u>RAB3A</u>     | 0 | 0 | 0 | 0 | 0 | 0 | 1 | 0 | 0 | 0 | 1 |
| <u>STK40</u>     | 0 | 0 | 0 | 0 | 0 | 0 | 1 | 0 | 0 | 0 | 1 |
| <u>PDLIM4</u>    | 0 | 0 | 0 | 0 | 0 | 0 | 1 | 0 | 0 | 0 | 1 |
| <u>VPS8</u>      | 0 | 0 | 0 | 0 | 0 | 0 | 1 | 0 | 0 | 0 | 1 |
| <u>ABHD2</u>     | 0 | 0 | 0 | 0 | 0 | 0 | 1 | 0 | 0 | 0 | 1 |
| <u>PNCK</u>      | 0 | 0 | 0 | 0 | 0 | 0 | 1 | 0 | 0 | 0 | 1 |

|                  |   |   |   |   |   |   |   |   |   |   |   |
|------------------|---|---|---|---|---|---|---|---|---|---|---|
| <u>PMP2</u>      | 0 | 0 | 0 | 0 | 0 | 0 | 1 | 0 | 0 | 0 | 1 |
| <u>FNBP1L</u>    | 0 | 0 | 0 | 0 | 0 | 0 | 1 | 0 | 0 | 0 | 1 |
| <u>ADCY3</u>     | 0 | 0 | 0 | 0 | 0 | 0 | 1 | 0 | 0 | 0 | 1 |
| <u>ELL</u>       | 0 | 0 | 0 | 0 | 0 | 0 | 1 | 0 | 0 | 0 | 1 |
| <u>DCLRE1A</u>   | 0 | 0 | 0 | 0 | 0 | 0 | 1 | 0 | 0 | 0 | 1 |
| <u>CCDC97</u>    | 0 | 0 | 0 | 0 | 0 | 0 | 1 | 0 | 0 | 0 | 1 |
| <u>HDAC11</u>    | 0 | 0 | 0 | 0 | 0 | 0 | 1 | 0 | 0 | 0 | 1 |
| <u>FLJ36031</u>  | 0 | 0 | 0 | 0 | 0 | 0 | 1 | 0 | 0 | 0 | 1 |
| <u>KIAA0368</u>  | 0 | 0 | 0 | 0 | 0 | 0 | 1 | 0 | 0 | 0 | 1 |
| <u>PIF1</u>      | 0 | 0 | 0 | 0 | 0 | 0 | 1 | 0 | 0 | 0 | 1 |
| <u>CD300C</u>    | 0 | 0 | 0 | 0 | 0 | 0 | 1 | 0 | 0 | 0 | 1 |
| <u>LPO</u>       | 0 | 0 | 0 | 0 | 0 | 0 | 1 | 0 | 0 | 0 | 1 |
| <u>MRPL10</u>    | 0 | 0 | 0 | 0 | 0 | 0 | 1 | 0 | 0 | 0 | 1 |
| <u>ZNF107</u>    | 0 | 0 | 0 | 0 | 0 | 0 | 1 | 0 | 0 | 0 | 1 |
| <u>BHLHB9</u>    | 0 | 0 | 0 | 0 | 0 | 0 | 1 | 0 | 0 | 0 | 1 |
| <u>CSRP2BP</u>   | 0 | 0 | 0 | 0 | 0 | 0 | 1 | 0 | 0 | 0 | 1 |
| <u>RHEBL1</u>    | 0 | 0 | 0 | 0 | 0 | 0 | 1 | 0 | 0 | 0 | 1 |
| <u>TBX22</u>     | 0 | 0 | 0 | 0 | 0 | 0 | 1 | 0 | 0 | 0 | 1 |
| <u>TAC4</u>      | 0 | 0 | 0 | 0 | 0 | 0 | 1 | 0 | 0 | 0 | 1 |
| <u>FBXL7</u>     | 0 | 0 | 0 | 0 | 0 | 0 | 1 | 0 | 0 | 0 | 1 |
| <u>CLEC2D</u>    | 0 | 0 | 0 | 0 | 0 | 0 | 1 | 0 | 0 | 0 | 1 |
| <u>FUNDC1</u>    | 0 | 0 | 0 | 0 | 0 | 0 | 1 | 0 | 0 | 0 | 1 |
| <u>NETO2</u>     | 0 | 0 | 0 | 0 | 0 | 0 | 1 | 0 | 0 | 0 | 1 |
| <u>VENTX</u>     | 0 | 0 | 0 | 0 | 0 | 0 | 1 | 0 | 0 | 0 | 1 |
| <u>HOXC4</u>     | 0 | 0 | 0 | 0 | 0 | 0 | 1 | 0 | 0 | 0 | 1 |
| <u>KIAA1967</u>  | 0 | 0 | 0 | 0 | 0 | 0 | 1 | 0 | 0 | 0 | 1 |
| <u>RCCD1</u>     | 0 | 0 | 0 | 0 | 0 | 0 | 1 | 0 | 0 | 0 | 1 |
| <u>HIF3A</u>     | 0 | 0 | 0 | 0 | 0 | 0 | 1 | 0 | 0 | 0 | 1 |
| <u>ABL1</u>      | 0 | 0 | 0 | 0 | 0 | 0 | 1 | 0 | 0 | 0 | 1 |
| <u>PIGH</u>      | 0 | 0 | 0 | 0 | 0 | 0 | 1 | 0 | 0 | 0 | 1 |
| <u>TNKS2</u>     | 0 | 0 | 0 | 0 | 0 | 0 | 1 | 0 | 0 | 0 | 1 |
| <u>COPZ1</u>     | 0 | 0 | 0 | 0 | 0 | 0 | 1 | 0 | 0 | 0 | 1 |
| <u>LOC400506</u> | 0 | 0 | 0 | 0 | 0 | 0 | 1 | 0 | 0 | 0 | 1 |
| <u>SEPHS1</u>    | 0 | 0 | 0 | 0 | 0 | 0 | 1 | 0 | 0 | 0 | 1 |
| <u>ZNF710</u>    | 0 | 0 | 0 | 0 | 0 | 0 | 1 | 0 | 0 | 0 | 1 |
| <u>DCP1B</u>     | 0 | 0 | 0 | 0 | 0 | 0 | 1 | 0 | 0 | 0 | 1 |
| <u>IL13</u>      | 0 | 0 | 0 | 0 | 0 | 0 | 1 | 0 | 0 | 0 | 1 |
| <u>LOC201164</u> | 0 | 0 | 0 | 0 | 0 | 0 | 1 | 0 | 0 | 0 | 1 |
| <u>KLK10</u>     | 0 | 0 | 0 | 0 | 0 | 0 | 1 | 0 | 0 | 0 | 1 |
| <u>C17orf28</u>  | 0 | 0 | 0 | 0 | 0 | 0 | 1 | 0 | 0 | 0 | 1 |
| <u>CECR5</u>     | 0 | 0 | 0 | 0 | 0 | 0 | 1 | 0 | 0 | 0 | 1 |



|                  |   |   |   |   |   |   |   |   |   |   |   |
|------------------|---|---|---|---|---|---|---|---|---|---|---|
| <u>ZER1</u>      | 0 | 0 | 0 | 0 | 0 | 0 | 1 | 0 | 0 | 0 | 1 |
| <u>LY9</u>       | 0 | 0 | 0 | 0 | 0 | 0 | 1 | 0 | 0 | 0 | 1 |
| <u>KIF21B</u>    | 0 | 0 | 0 | 0 | 0 | 0 | 1 | 0 | 0 | 0 | 1 |
| <u>C15orf39</u>  | 0 | 0 | 0 | 0 | 0 | 0 | 1 | 0 | 0 | 0 | 1 |
| <u>SLC6A16</u>   | 0 | 0 | 0 | 0 | 0 | 0 | 1 | 0 | 0 | 0 | 1 |
| <u>ACTR5</u>     | 0 | 0 | 0 | 0 | 0 | 0 | 1 | 0 | 0 | 0 | 1 |
| <u>TMBIM4</u>    | 0 | 0 | 0 | 0 | 0 | 0 | 1 | 0 | 0 | 0 | 1 |
| <u>PACSIN1</u>   | 0 | 0 | 0 | 0 | 0 | 0 | 1 | 0 | 0 | 0 | 1 |
| <u>LSS</u>       | 0 | 0 | 0 | 0 | 0 | 0 | 1 | 0 | 0 | 0 | 1 |
| <u>ABR</u>       | 0 | 0 | 0 | 0 | 0 | 0 | 1 | 0 | 0 | 0 | 1 |
| <u>CD274</u>     | 0 | 0 | 0 | 0 | 0 | 0 | 1 | 0 | 0 | 0 | 1 |
| <u>SLMO1</u>     | 0 | 0 | 0 | 0 | 0 | 0 | 1 | 0 | 0 | 0 | 1 |
| <u>PHF13</u>     | 0 | 0 | 0 | 0 | 0 | 0 | 1 | 0 | 0 | 0 | 1 |
| <u>GALNT11</u>   | 0 | 0 | 0 | 0 | 0 | 0 | 1 | 0 | 0 | 0 | 1 |
| <u>PAIP2</u>     | 0 | 0 | 0 | 0 | 0 | 0 | 1 | 0 | 0 | 0 | 1 |
| <u>FOXN3</u>     | 0 | 0 | 0 | 0 | 0 | 0 | 1 | 0 | 0 | 0 | 1 |
| <u>SLC25A42</u>  | 0 | 0 | 0 | 0 | 0 | 0 | 1 | 0 | 0 | 0 | 1 |
| <u>COQ5</u>      | 0 | 0 | 0 | 0 | 0 | 0 | 1 | 0 | 0 | 0 | 1 |
| <u>PVRIG</u>     | 0 | 0 | 0 | 0 | 0 | 0 | 1 | 0 | 0 | 0 | 1 |
| <u>UCHL1</u>     | 0 | 0 | 0 | 0 | 0 | 0 | 1 | 0 | 0 | 0 | 1 |
| <u>SH3PXD2A</u>  | 0 | 0 | 0 | 0 | 0 | 0 | 1 | 0 | 0 | 0 | 1 |
| <u>WWP2</u>      | 0 | 0 | 0 | 0 | 0 | 0 | 1 | 0 | 0 | 0 | 1 |
| <u>ADPRHL2</u>   | 0 | 0 | 0 | 0 | 0 | 0 | 1 | 0 | 0 | 0 | 1 |
| <u>C8A</u>       | 0 | 0 | 0 | 0 | 0 | 0 | 1 | 0 | 0 | 0 | 1 |
| <u>TIFAB</u>     | 0 | 0 | 0 | 0 | 0 | 0 | 1 | 0 | 0 | 0 | 1 |
| <u>C9orf16</u>   | 0 | 0 | 0 | 0 | 0 | 0 | 1 | 0 | 0 | 0 | 1 |
| <u>STARD8</u>    | 0 | 0 | 0 | 0 | 0 | 0 | 1 | 0 | 0 | 0 | 1 |
| <u>SMEK1</u>     | 0 | 0 | 0 | 0 | 0 | 0 | 1 | 0 | 0 | 0 | 1 |
| <u>TARBP2</u>    | 0 | 0 | 0 | 0 | 0 | 0 | 1 | 0 | 0 | 0 | 1 |
| <u>MAL</u>       | 0 | 0 | 0 | 0 | 0 | 0 | 1 | 0 | 0 | 0 | 1 |
| <u>SLCO1B3</u>   | 0 | 0 | 0 | 0 | 0 | 0 | 1 | 0 | 0 | 0 | 1 |
| <u>CCDC12</u>    | 0 | 0 | 0 | 0 | 0 | 0 | 1 | 0 | 0 | 0 | 1 |
| <u>RNF139</u>    | 0 | 0 | 0 | 0 | 0 | 0 | 1 | 0 | 0 | 0 | 1 |
| <u>COL15A1</u>   | 0 | 0 | 0 | 0 | 0 | 0 | 1 | 0 | 0 | 0 | 1 |
| <u>SPN</u>       | 0 | 0 | 0 | 0 | 0 | 0 | 1 | 0 | 0 | 0 | 1 |
| <u>TLR7</u>      | 0 | 0 | 0 | 0 | 0 | 0 | 1 | 0 | 0 | 0 | 1 |
| <u>KIAA0355</u>  | 0 | 0 | 0 | 0 | 0 | 0 | 1 | 0 | 0 | 0 | 1 |
| <u>FRMD4A</u>    | 0 | 0 | 0 | 0 | 0 | 0 | 1 | 0 | 0 | 0 | 1 |
| <u>POLR2J</u>    | 0 | 0 | 0 | 0 | 0 | 0 | 1 | 0 | 0 | 0 | 1 |
| <u>KIAA0319L</u> | 0 | 0 | 0 | 0 | 0 | 0 | 1 | 0 | 0 | 0 | 1 |
| <u>CTTN</u>      | 0 | 0 | 0 | 0 | 0 | 0 | 1 | 0 | 0 | 0 | 1 |

|                  |   |   |   |   |   |   |   |   |   |   |   |
|------------------|---|---|---|---|---|---|---|---|---|---|---|
| <u>IRF2BP2</u>   | 0 | 0 | 0 | 0 | 0 | 0 | 1 | 0 | 0 | 0 | 1 |
| <u>ABAT</u>      | 0 | 0 | 0 | 0 | 0 | 0 | 1 | 0 | 0 | 0 | 1 |
| <u>POU3F1</u>    | 0 | 0 | 0 | 0 | 0 | 0 | 1 | 0 | 0 | 0 | 1 |
| <u>PRNT</u>      | 0 | 0 | 0 | 0 | 0 | 0 | 1 | 0 | 0 | 0 | 1 |
| <u>FOXQ1</u>     | 0 | 0 | 0 | 0 | 0 | 0 | 1 | 0 | 0 | 0 | 1 |
| <u>ALAD</u>      | 0 | 0 | 0 | 0 | 0 | 0 | 1 | 0 | 0 | 0 | 1 |
| <u>HNRPH2</u>    | 0 | 0 | 0 | 0 | 0 | 0 | 1 | 0 | 0 | 0 | 1 |
| <u>POLA2</u>     | 0 | 0 | 0 | 0 | 0 | 0 | 1 | 0 | 0 | 0 | 1 |
| <u>TRAPPC2</u>   | 0 | 0 | 0 | 0 | 0 | 0 | 1 | 0 | 0 | 0 | 1 |
| <u>DHRS13</u>    | 0 | 0 | 0 | 0 | 0 | 0 | 1 | 0 | 0 | 0 | 1 |
| <u>WDFY2</u>     | 0 | 0 | 0 | 0 | 0 | 0 | 1 | 0 | 0 | 0 | 1 |
| <u>SVEP1</u>     | 0 | 0 | 0 | 0 | 0 | 0 | 1 | 0 | 0 | 0 | 1 |
| <u>C9orf163</u>  | 0 | 0 | 0 | 0 | 0 | 0 | 1 | 0 | 0 | 0 | 1 |
| <u>VNN1</u>      | 0 | 0 | 0 | 0 | 0 | 0 | 1 | 0 | 0 | 0 | 1 |
| <u>C14orf130</u> | 0 | 0 | 0 | 0 | 0 | 0 | 1 | 0 | 0 | 0 | 1 |
| <u>CCDC59</u>    | 0 | 0 | 0 | 0 | 0 | 0 | 1 | 0 | 0 | 0 | 1 |
| <u>VAT1</u>      | 0 | 0 | 0 | 0 | 0 | 0 | 1 | 0 | 0 | 0 | 1 |
| <u>ACTR8</u>     | 0 | 0 | 0 | 0 | 0 | 0 | 1 | 0 | 0 | 0 | 1 |
| <u>TSPYL6</u>    | 0 | 0 | 0 | 0 | 0 | 0 | 1 | 0 | 0 | 0 | 1 |
| <u>USP43</u>     | 0 | 0 | 0 | 0 | 0 | 0 | 1 | 0 | 0 | 0 | 1 |
| <u>PDE4B</u>     | 0 | 0 | 0 | 0 | 0 | 0 | 1 | 0 | 0 | 0 | 1 |
| <u>C2orf52</u>   | 0 | 0 | 0 | 0 | 0 | 0 | 1 | 0 | 0 | 0 | 1 |
| <u>EDG8</u>      | 0 | 0 | 0 | 0 | 0 | 0 | 1 | 0 | 0 | 0 | 1 |
| <u>SLC2A2</u>    | 0 | 0 | 0 | 0 | 0 | 0 | 1 | 0 | 0 | 0 | 1 |
| <u>KBTBD5</u>    | 0 | 0 | 0 | 0 | 0 | 0 | 1 | 0 | 0 | 0 | 1 |
| <u>VPS26B</u>    | 0 | 0 | 0 | 0 | 0 | 0 | 1 | 0 | 0 | 0 | 1 |
| <u>SLC30A2</u>   | 0 | 0 | 0 | 0 | 0 | 0 | 1 | 0 | 0 | 0 | 1 |
| <u>IHPK2</u>     | 0 | 0 | 0 | 0 | 0 | 0 | 1 | 0 | 0 | 0 | 1 |
| <u>ZFYVE1</u>    | 0 | 0 | 0 | 0 | 0 | 0 | 1 | 0 | 0 | 0 | 1 |
| <u>ZNF233</u>    | 0 | 0 | 0 | 0 | 0 | 0 | 1 | 0 | 0 | 0 | 1 |
| <u>RBM9</u>      | 0 | 0 | 0 | 0 | 0 | 0 | 1 | 0 | 0 | 0 | 1 |
| <u>PCSK9</u>     | 0 | 0 | 0 | 0 | 0 | 0 | 1 | 0 | 0 | 0 | 1 |
| <u>GOLSYN</u>    | 0 | 0 | 0 | 0 | 0 | 0 | 1 | 0 | 0 | 0 | 1 |
| <u>BTBD9</u>     | 0 | 0 | 0 | 0 | 0 | 0 | 1 | 0 | 0 | 0 | 1 |
| <u>CPA1</u>      | 0 | 0 | 0 | 0 | 0 | 0 | 1 | 0 | 0 | 0 | 1 |
| <u>DEGS2</u>     | 0 | 0 | 0 | 0 | 0 | 0 | 1 | 0 | 0 | 0 | 1 |
| <u>ZNF614</u>    | 0 | 0 | 0 | 0 | 0 | 0 | 1 | 0 | 0 | 0 | 1 |
| <u>G6PC2</u>     | 0 | 0 | 0 | 0 | 0 | 0 | 1 | 0 | 0 | 0 | 1 |
| <u>FMOD</u>      | 0 | 0 | 0 | 0 | 0 | 0 | 1 | 0 | 0 | 0 | 1 |
| <u>HARS2</u>     | 0 | 0 | 0 | 0 | 0 | 0 | 1 | 0 | 0 | 0 | 1 |
| <u>SCAMP5</u>    | 0 | 0 | 0 | 0 | 0 | 0 | 1 | 0 | 0 | 0 | 1 |

|                 |   |   |   |   |   |   |   |   |   |   |   |
|-----------------|---|---|---|---|---|---|---|---|---|---|---|
| <u>SMYD4</u>    | 0 | 0 | 0 | 0 | 0 | 0 | 1 | 0 | 0 | 0 | 1 |
| <u>UMODL1</u>   | 0 | 0 | 0 | 0 | 0 | 0 | 1 | 0 | 0 | 0 | 1 |
| <u>LARS2</u>    | 0 | 0 | 0 | 0 | 0 | 0 | 1 | 0 | 0 | 0 | 1 |
| <u>PDILT</u>    | 0 | 0 | 0 | 0 | 0 | 0 | 1 | 0 | 0 | 0 | 1 |
| <u>USP48</u>    | 0 | 0 | 0 | 0 | 0 | 0 | 1 | 0 | 0 | 0 | 1 |
| <u>C8orf46</u>  | 0 | 0 | 0 | 0 | 0 | 0 | 1 | 0 | 0 | 0 | 1 |
| <u>DAP3</u>     | 0 | 0 | 0 | 0 | 0 | 0 | 1 | 0 | 0 | 0 | 1 |
| <u>NECAB3</u>   | 0 | 0 | 0 | 0 | 0 | 0 | 1 | 0 | 0 | 0 | 1 |
| <u>ATP6V0C</u>  | 0 | 0 | 0 | 0 | 0 | 0 | 1 | 0 | 0 | 0 | 1 |
| <u>RAB31</u>    | 0 | 0 | 0 | 0 | 0 | 0 | 1 | 0 | 0 | 0 | 1 |
| <u>TOR2A</u>    | 0 | 0 | 0 | 0 | 0 | 0 | 1 | 0 | 0 | 0 | 1 |
| <u>TMC7</u>     | 0 | 0 | 0 | 0 | 0 | 0 | 1 | 0 | 0 | 0 | 1 |
| <u>GPM6B</u>    | 0 | 0 | 0 | 0 | 0 | 0 | 1 | 0 | 0 | 0 | 1 |
| <u>LITAF</u>    | 0 | 0 | 0 | 0 | 0 | 0 | 1 | 0 | 0 | 0 | 1 |
| <u>MIF4GD</u>   | 0 | 0 | 0 | 0 | 0 | 0 | 1 | 0 | 0 | 0 | 1 |
| <u>GPAA1</u>    | 0 | 0 | 0 | 0 | 0 | 0 | 1 | 0 | 0 | 0 | 1 |
| <u>RAC2</u>     | 0 | 0 | 0 | 0 | 0 | 0 | 1 | 0 | 0 | 0 | 1 |
| <u>JUB</u>      | 0 | 0 | 0 | 0 | 0 | 0 | 1 | 0 | 0 | 0 | 1 |
| <u>GLOD4</u>    | 0 | 0 | 0 | 0 | 0 | 0 | 1 | 0 | 0 | 0 | 1 |
| <u>ZMYM6</u>    | 0 | 0 | 0 | 0 | 0 | 0 | 1 | 0 | 0 | 0 | 1 |
| <u>CCDC44</u>   | 0 | 0 | 0 | 0 | 0 | 0 | 1 | 0 | 0 | 0 | 1 |
| <u>HDAC2</u>    | 0 | 0 | 0 | 0 | 0 | 0 | 1 | 0 | 0 | 0 | 1 |
| <u>TRIM24</u>   | 0 | 0 | 0 | 0 | 0 | 0 | 1 | 0 | 0 | 0 | 1 |
| <u>SEC23B</u>   | 0 | 0 | 0 | 0 | 0 | 0 | 1 | 0 | 0 | 0 | 1 |
| <u>GGNBP2</u>   | 0 | 0 | 0 | 0 | 0 | 0 | 1 | 0 | 0 | 0 | 1 |
| <u>KRTAP5-9</u> | 0 | 0 | 0 | 0 | 0 | 0 | 1 | 0 | 0 | 0 | 1 |
| <u>MAPKAP1</u>  | 0 | 0 | 0 | 0 | 0 | 0 | 1 | 0 | 0 | 0 | 1 |
| <u>PRX</u>      | 0 | 0 | 0 | 0 | 0 | 0 | 1 | 0 | 0 | 0 | 1 |
| <u>ARL15</u>    | 0 | 0 | 0 | 0 | 0 | 0 | 1 | 0 | 0 | 0 | 1 |
| <u>CNR2</u>     | 0 | 0 | 0 | 0 | 0 | 0 | 1 | 0 | 0 | 0 | 1 |
| <u>GLI3</u>     | 0 | 0 | 0 | 0 | 0 | 0 | 1 | 0 | 0 | 0 | 1 |
| <u>TMEM25</u>   | 0 | 0 | 0 | 0 | 0 | 0 | 1 | 0 | 0 | 0 | 1 |
| <u>DUSP8</u>    | 0 | 0 | 0 | 0 | 0 | 0 | 1 | 0 | 0 | 0 | 1 |
| <u>CEP78</u>    | 0 | 0 | 0 | 0 | 0 | 0 | 1 | 0 | 0 | 0 | 1 |
| <u>BTN2A2</u>   | 0 | 0 | 0 | 0 | 0 | 0 | 1 | 0 | 0 | 0 | 1 |
| <u>TREML2</u>   | 0 | 0 | 0 | 0 | 0 | 0 | 1 | 0 | 0 | 0 | 1 |
| <u>TMC1</u>     | 0 | 0 | 0 | 0 | 0 | 0 | 1 | 0 | 0 | 0 | 1 |
| <u>ZFP3</u>     | 0 | 0 | 0 | 0 | 0 | 0 | 1 | 0 | 0 | 0 | 1 |
| <u>KIF7</u>     | 0 | 0 | 0 | 0 | 0 | 0 | 1 | 0 | 0 | 0 | 1 |
| <u>C7orf54</u>  | 0 | 0 | 0 | 0 | 0 | 0 | 1 | 0 | 0 | 0 | 1 |
| <u>STK11IP</u>  | 0 | 0 | 0 | 0 | 0 | 0 | 1 | 0 | 0 | 0 | 1 |

|                 |   |   |   |   |   |   |   |   |   |   |   |
|-----------------|---|---|---|---|---|---|---|---|---|---|---|
| <u>CDC48</u>    | 0 | 0 | 0 | 0 | 0 | 0 | 1 | 0 | 0 | 0 | 1 |
| <u>MMS19</u>    | 0 | 0 | 0 | 0 | 0 | 0 | 1 | 0 | 0 | 0 | 1 |
| <u>ALDOB</u>    | 0 | 0 | 0 | 0 | 0 | 0 | 1 | 0 | 0 | 0 | 1 |
| <u>TCHP</u>     | 0 | 0 | 0 | 0 | 0 | 0 | 1 | 0 | 0 | 0 | 1 |
| <u>MGLL</u>     | 0 | 0 | 0 | 0 | 0 | 0 | 1 | 0 | 0 | 0 | 1 |
| <u>ODF3L1</u>   | 0 | 0 | 0 | 0 | 0 | 0 | 1 | 0 | 0 | 0 | 1 |
| <u>SPATA8</u>   | 0 | 0 | 0 | 0 | 0 | 0 | 1 | 0 | 0 | 0 | 1 |
| <u>TRMT11</u>   | 0 | 0 | 0 | 0 | 0 | 0 | 1 | 0 | 0 | 0 | 1 |
| <u>NKX3-1</u>   | 0 | 0 | 0 | 0 | 0 | 0 | 1 | 0 | 0 | 0 | 1 |
| <u>STIL</u>     | 0 | 0 | 0 | 0 | 0 | 0 | 1 | 0 | 0 | 0 | 1 |
| <u>GCET2</u>    | 0 | 0 | 0 | 0 | 0 | 0 | 1 | 0 | 0 | 0 | 1 |
| <u>UPF3A</u>    | 0 | 0 | 0 | 0 | 0 | 0 | 1 | 0 | 0 | 0 | 1 |
| <u>TCF19</u>    | 0 | 0 | 0 | 0 | 0 | 0 | 1 | 0 | 0 | 0 | 1 |
| <u>SMARCC1</u>  | 0 | 0 | 0 | 0 | 0 | 0 | 1 | 0 | 0 | 0 | 1 |
| <u>ORC4L</u>    | 0 | 0 | 0 | 0 | 0 | 0 | 1 | 0 | 0 | 0 | 1 |
| <u>ARCN1</u>    | 0 | 0 | 0 | 0 | 0 | 0 | 1 | 0 | 0 | 0 | 1 |
| <u>HHIPL2</u>   | 0 | 0 | 0 | 0 | 0 | 0 | 1 | 0 | 0 | 0 | 1 |
| <u>ESRRB</u>    | 0 | 0 | 0 | 0 | 0 | 0 | 1 | 0 | 0 | 0 | 1 |
| <u>C3orf60</u>  | 0 | 0 | 0 | 0 | 0 | 0 | 1 | 0 | 0 | 0 | 1 |
| <u>RBM15B</u>   | 0 | 0 | 0 | 0 | 0 | 0 | 1 | 0 | 0 | 0 | 1 |
| <u>ACTR1A</u>   | 0 | 0 | 0 | 0 | 0 | 0 | 1 | 0 | 0 | 0 | 1 |
| <u>JMJD2B</u>   | 0 | 0 | 0 | 0 | 0 | 0 | 1 | 0 | 0 | 0 | 1 |
| <u>RASGRP3</u>  | 0 | 0 | 0 | 0 | 0 | 0 | 1 | 0 | 0 | 0 | 1 |
| <u>TMEM44</u>   | 0 | 0 | 0 | 0 | 0 | 0 | 1 | 0 | 0 | 0 | 1 |
| <u>C3orf32</u>  | 0 | 0 | 0 | 0 | 0 | 0 | 1 | 0 | 0 | 0 | 1 |
| <u>ITK</u>      | 0 | 0 | 0 | 0 | 0 | 0 | 1 | 0 | 0 | 0 | 1 |
| <u>GIMAP4</u>   | 0 | 0 | 0 | 0 | 0 | 0 | 1 | 0 | 0 | 0 | 1 |
| <u>C16orf35</u> | 0 | 0 | 0 | 0 | 0 | 0 | 1 | 0 | 0 | 0 | 1 |
| <u>PIGY</u>     | 0 | 0 | 0 | 0 | 0 | 0 | 1 | 0 | 0 | 0 | 1 |
| <u>POP7</u>     | 0 | 0 | 0 | 0 | 0 | 0 | 1 | 0 | 0 | 0 | 1 |
| <u>NADK</u>     | 0 | 0 | 0 | 0 | 0 | 0 | 1 | 0 | 0 | 0 | 1 |
| <u>ZNF323</u>   | 0 | 0 | 0 | 0 | 0 | 0 | 1 | 0 | 0 | 0 | 1 |
| <u>TTC3</u>     | 0 | 0 | 0 | 0 | 0 | 0 | 1 | 0 | 0 | 0 | 1 |
| <u>TDPI</u>     | 0 | 0 | 0 | 0 | 0 | 0 | 1 | 0 | 0 | 0 | 1 |
| <u>SNX21</u>    | 0 | 0 | 0 | 0 | 0 | 0 | 1 | 0 | 0 | 0 | 1 |
| <u>BZRAP1</u>   | 0 | 0 | 0 | 0 | 0 | 0 | 1 | 0 | 0 | 0 | 1 |
| <u>PMVK</u>     | 0 | 0 | 0 | 0 | 0 | 0 | 1 | 0 | 0 | 0 | 1 |
| <u>CDH15</u>    | 0 | 0 | 0 | 0 | 0 | 0 | 1 | 0 | 0 | 0 | 1 |
| <u>TMCO4</u>    | 0 | 0 | 0 | 0 | 0 | 0 | 1 | 0 | 0 | 0 | 1 |
| <u>METTL4</u>   | 0 | 0 | 0 | 0 | 0 | 0 | 1 | 0 | 0 | 0 | 1 |
| <u>PSCD3</u>    | 0 | 0 | 0 | 0 | 0 | 0 | 1 | 0 | 0 | 0 | 1 |

|                  |   |   |   |   |   |   |   |   |   |   |   |
|------------------|---|---|---|---|---|---|---|---|---|---|---|
| <u>CPLX3</u>     | 0 | 0 | 0 | 0 | 0 | 0 | 1 | 0 | 0 | 0 | 1 |
| <u>GDF5</u>      | 0 | 0 | 0 | 0 | 0 | 0 | 1 | 0 | 0 | 0 | 1 |
| <u>C16orf80</u>  | 0 | 0 | 0 | 0 | 0 | 0 | 1 | 0 | 0 | 0 | 1 |
| <u>MAOB</u>      | 0 | 0 | 0 | 0 | 0 | 0 | 1 | 0 | 0 | 0 | 1 |
| <u>TSEN34</u>    | 0 | 0 | 0 | 0 | 0 | 0 | 1 | 0 | 0 | 0 | 1 |
| <u>PITPNM2</u>   | 0 | 0 | 0 | 0 | 0 | 0 | 1 | 0 | 0 | 0 | 1 |
| <u>ICOS</u>      | 0 | 0 | 0 | 0 | 0 | 0 | 1 | 0 | 0 | 0 | 1 |
| <u>FOXA1</u>     | 0 | 0 | 0 | 0 | 0 | 0 | 1 | 0 | 0 | 0 | 1 |
| <u>TSPAN3</u>    | 0 | 0 | 0 | 0 | 0 | 0 | 1 | 0 | 0 | 0 | 1 |
| <u>SRPRB</u>     | 0 | 0 | 0 | 0 | 0 | 0 | 1 | 0 | 0 | 0 | 1 |
| <u>C20orf106</u> | 0 | 0 | 0 | 0 | 0 | 0 | 1 | 0 | 0 | 0 | 1 |
| <u>C1orf163</u>  | 0 | 0 | 0 | 0 | 0 | 0 | 1 | 0 | 0 | 0 | 1 |
| <u>KCNA5</u>     | 0 | 0 | 0 | 0 | 0 | 0 | 1 | 0 | 0 | 0 | 1 |
| <u>ZMAT2</u>     | 0 | 0 | 0 | 0 | 0 | 0 | 1 | 0 | 0 | 0 | 1 |
| <u>RNF216</u>    | 0 | 0 | 0 | 0 | 0 | 0 | 1 | 0 | 0 | 0 | 1 |
| <u>RTN4IP1</u>   | 0 | 0 | 0 | 0 | 0 | 0 | 1 | 0 | 0 | 0 | 1 |
| <u>OLFM4</u>     | 0 | 0 | 0 | 0 | 0 | 0 | 1 | 0 | 0 | 0 | 1 |
| <u>NYX</u>       | 0 | 0 | 0 | 0 | 0 | 0 | 1 | 0 | 0 | 0 | 1 |
| <u>SPAG17</u>    | 0 | 0 | 0 | 0 | 0 | 0 | 1 | 0 | 0 | 0 | 1 |
| <u>PDZK1IP1</u>  | 0 | 0 | 0 | 0 | 0 | 0 | 1 | 0 | 0 | 0 | 1 |
| <u>CYLC2</u>     | 0 | 0 | 0 | 0 | 0 | 0 | 1 | 0 | 0 | 0 | 1 |
| <u>OPRM1</u>     | 0 | 0 | 0 | 0 | 0 | 0 | 1 | 0 | 0 | 0 | 1 |
| <u>YEATS2</u>    | 0 | 0 | 0 | 0 | 0 | 0 | 1 | 0 | 0 | 0 | 1 |
| <u>ANGPTL7</u>   | 0 | 0 | 0 | 0 | 0 | 0 | 1 | 0 | 0 | 0 | 1 |
| <u>PATZ1</u>     | 0 | 0 | 0 | 0 | 0 | 0 | 1 | 0 | 0 | 0 | 1 |
| <u>SLC12A1</u>   | 0 | 0 | 0 | 0 | 0 | 0 | 1 | 0 | 0 | 0 | 1 |
| <u>GZF1</u>      | 0 | 0 | 0 | 0 | 0 | 0 | 1 | 0 | 0 | 0 | 1 |
| <u>FLJ90650</u>  | 0 | 0 | 0 | 0 | 0 | 0 | 1 | 0 | 0 | 0 | 1 |
| <u>TAL1</u>      | 0 | 0 | 0 | 0 | 0 | 0 | 1 | 0 | 0 | 0 | 1 |
| <u>PSMG3</u>     | 0 | 0 | 0 | 0 | 0 | 0 | 1 | 0 | 0 | 0 | 1 |
| <u>C1orf210</u>  | 0 | 0 | 0 | 0 | 0 | 0 | 1 | 0 | 0 | 0 | 1 |
| <u>FBXL8</u>     | 0 | 0 | 0 | 0 | 0 | 0 | 1 | 0 | 0 | 0 | 1 |
| <u>CCT8</u>      | 0 | 0 | 0 | 0 | 0 | 0 | 1 | 0 | 0 | 0 | 1 |
| <u>MKRN3</u>     | 0 | 0 | 0 | 0 | 0 | 0 | 1 | 0 | 0 | 0 | 1 |
| <u>MESDC1</u>    | 0 | 0 | 0 | 0 | 0 | 0 | 1 | 0 | 0 | 0 | 1 |
| <u>RELL1</u>     | 0 | 0 | 0 | 0 | 0 | 0 | 1 | 0 | 0 | 0 | 1 |
| <u>ZNF330</u>    | 0 | 0 | 0 | 0 | 0 | 0 | 1 | 0 | 0 | 0 | 1 |
| <u>C9orf135</u>  | 0 | 0 | 0 | 0 | 0 | 0 | 1 | 0 | 0 | 0 | 1 |
| <u>ZC3HC1</u>    | 0 | 0 | 0 | 0 | 0 | 0 | 1 | 0 | 0 | 0 | 1 |
| <u>FLJ35767</u>  | 0 | 0 | 0 | 0 | 0 | 0 | 1 | 0 | 0 | 0 | 1 |
| <u>CCDC69</u>    | 0 | 0 | 0 | 0 | 0 | 0 | 1 | 0 | 0 | 0 | 1 |

|                 |   |   |   |   |   |   |   |   |   |   |   |
|-----------------|---|---|---|---|---|---|---|---|---|---|---|
| <u>SAP18</u>    | 0 | 0 | 0 | 0 | 0 | 0 | 1 | 0 | 0 | 0 | 1 |
| <u>ABHD6</u>    | 0 | 0 | 0 | 0 | 0 | 0 | 1 | 0 | 0 | 0 | 1 |
| <u>CHRNA2</u>   | 0 | 0 | 0 | 0 | 0 | 0 | 1 | 0 | 0 | 0 | 1 |
| <u>RAPGEFL1</u> | 0 | 0 | 0 | 0 | 0 | 0 | 1 | 0 | 0 | 0 | 1 |
| <u>KDELRL1</u>  | 0 | 0 | 0 | 0 | 0 | 0 | 1 | 0 | 0 | 0 | 1 |
| <u>PIP5K1C</u>  | 0 | 0 | 0 | 0 | 0 | 0 | 1 | 0 | 0 | 0 | 1 |
| <u>UBR4</u>     | 0 | 0 | 0 | 0 | 0 | 0 | 1 | 0 | 0 | 0 | 1 |
| <u>C21orf62</u> | 0 | 0 | 0 | 0 | 0 | 0 | 1 | 0 | 0 | 0 | 1 |
| <u>TMEM59</u>   | 0 | 0 | 0 | 0 | 0 | 0 | 1 | 0 | 0 | 0 | 1 |
| <u>CTNNBIP1</u> | 0 | 0 | 0 | 0 | 0 | 0 | 1 | 0 | 0 | 0 | 1 |
| <u>MAP2K7</u>   | 0 | 0 | 0 | 0 | 0 | 0 | 1 | 0 | 0 | 0 | 1 |
| <u>LDHAL6A</u>  | 0 | 0 | 0 | 0 | 0 | 0 | 1 | 0 | 0 | 0 | 1 |
| <u>CCPG1</u>    | 0 | 0 | 0 | 0 | 0 | 0 | 1 | 0 | 0 | 0 | 1 |
| <u>FHOD1</u>    | 0 | 0 | 0 | 0 | 0 | 0 | 1 | 0 | 0 | 0 | 1 |
| <u>CNN1</u>     | 0 | 0 | 0 | 0 | 0 | 0 | 1 | 0 | 0 | 0 | 1 |
| <u>C3orf15</u>  | 0 | 0 | 0 | 0 | 0 | 0 | 1 | 0 | 0 | 0 | 1 |
| <u>C22orf15</u> | 0 | 0 | 0 | 0 | 0 | 0 | 1 | 0 | 0 | 0 | 1 |
| <u>PDYN</u>     | 0 | 0 | 0 | 0 | 0 | 0 | 1 | 0 | 0 | 0 | 1 |
| <u>DPF1</u>     | 0 | 0 | 0 | 0 | 0 | 0 | 1 | 0 | 0 | 0 | 1 |
| <u>KCNAB2</u>   | 0 | 0 | 0 | 0 | 0 | 0 | 1 | 0 | 0 | 0 | 1 |
| <u>MCM2</u>     | 0 | 0 | 0 | 0 | 0 | 0 | 1 | 0 | 0 | 0 | 1 |
| <u>SNAP91</u>   | 0 | 0 | 0 | 0 | 0 | 0 | 1 | 0 | 0 | 0 | 1 |
| <u>GPATCH2</u>  | 0 | 0 | 0 | 0 | 0 | 0 | 1 | 0 | 0 | 0 | 1 |
| <u>USP1</u>     | 0 | 0 | 0 | 0 | 0 | 0 | 1 | 0 | 0 | 0 | 1 |
| <u>ZNF275</u>   | 0 | 0 | 0 | 0 | 0 | 0 | 1 | 0 | 0 | 0 | 1 |
| <u>CNOT7</u>    | 0 | 0 | 0 | 0 | 0 | 0 | 1 | 0 | 0 | 0 | 1 |
| <u>UBXD7</u>    | 0 | 0 | 0 | 0 | 0 | 0 | 1 | 0 | 0 | 0 | 1 |
| <u>MAPK11</u>   | 0 | 0 | 0 | 0 | 0 | 0 | 1 | 0 | 0 | 0 | 1 |
| <u>PANX2</u>    | 0 | 0 | 0 | 0 | 0 | 0 | 1 | 0 | 0 | 0 | 1 |
| <u>PCDHGA1</u>  | 0 | 0 | 0 | 0 | 0 | 0 | 1 | 0 | 0 | 0 | 1 |
| <u>LETM1</u>    | 0 | 0 | 0 | 0 | 0 | 0 | 1 | 0 | 0 | 0 | 1 |
| <u>ZNF354A</u>  | 0 | 0 | 0 | 0 | 0 | 0 | 1 | 0 | 0 | 0 | 1 |
| <u>HINT1</u>    | 0 | 0 | 0 | 0 | 0 | 0 | 1 | 0 | 0 | 0 | 1 |
| <u>KIAA0515</u> | 0 | 0 | 0 | 0 | 0 | 0 | 1 | 0 | 0 | 0 | 1 |
| <u>RAD1</u>     | 0 | 0 | 0 | 0 | 0 | 0 | 1 | 0 | 0 | 0 | 1 |
| <u>ZNF695</u>   | 0 | 0 | 0 | 0 | 0 | 0 | 1 | 0 | 0 | 0 | 1 |
| <u>SHROOM4</u>  | 0 | 0 | 0 | 0 | 0 | 0 | 1 | 0 | 0 | 0 | 1 |
| <u>NFIX</u>     | 0 | 0 | 0 | 0 | 0 | 0 | 1 | 0 | 0 | 0 | 1 |
| <u>KRI1</u>     | 0 | 0 | 0 | 0 | 0 | 0 | 1 | 0 | 0 | 0 | 1 |
| <u>SLC16A3</u>  | 0 | 0 | 0 | 0 | 0 | 0 | 1 | 0 | 0 | 0 | 1 |
| <u>ADCK1</u>    | 0 | 0 | 0 | 0 | 0 | 0 | 1 | 0 | 0 | 0 | 1 |

|                  |   |   |   |   |   |   |   |   |   |   |   |
|------------------|---|---|---|---|---|---|---|---|---|---|---|
| <u>RBED1</u>     | 0 | 0 | 0 | 0 | 0 | 0 | 1 | 0 | 0 | 0 | 1 |
| <u>SPRED1</u>    | 0 | 0 | 0 | 0 | 0 | 0 | 1 | 0 | 0 | 0 | 1 |
| <u>SERP2</u>     | 0 | 0 | 0 | 0 | 0 | 0 | 1 | 0 | 0 | 0 | 1 |
| <u>KIDINS220</u> | 0 | 0 | 0 | 0 | 0 | 0 | 1 | 0 | 0 | 0 | 1 |
| <u>TP53BP2</u>   | 0 | 0 | 0 | 0 | 0 | 0 | 1 | 0 | 0 | 0 | 1 |
| <u>SEC14L2</u>   | 0 | 0 | 0 | 0 | 0 | 0 | 1 | 0 | 0 | 0 | 1 |
| <u>NOD2</u>      | 0 | 0 | 0 | 0 | 0 | 0 | 1 | 0 | 0 | 0 | 1 |
| <u>IGF2R</u>     | 0 | 0 | 0 | 0 | 0 | 0 | 1 | 0 | 0 | 0 | 1 |
| <u>DPH5</u>      | 0 | 0 | 0 | 0 | 0 | 0 | 1 | 0 | 0 | 0 | 1 |
| <u>ZNF548</u>    | 0 | 0 | 0 | 0 | 0 | 0 | 1 | 0 | 0 | 0 | 1 |
| <u>DAZAP1</u>    | 0 | 0 | 0 | 0 | 0 | 0 | 1 | 0 | 0 | 0 | 1 |
| <u>C14orf1</u>   | 0 | 0 | 0 | 0 | 0 | 0 | 1 | 0 | 0 | 0 | 1 |
| <u>TMEM87A</u>   | 0 | 0 | 0 | 0 | 0 | 0 | 1 | 0 | 0 | 0 | 1 |
| <u>ADPGK</u>     | 0 | 0 | 0 | 0 | 0 | 0 | 1 | 0 | 0 | 0 | 1 |
| <u>CYBASC3</u>   | 0 | 0 | 0 | 0 | 0 | 0 | 1 | 0 | 0 | 0 | 1 |
| <u>ENAM</u>      | 0 | 0 | 0 | 0 | 0 | 0 | 1 | 0 | 0 | 0 | 1 |
| <u>BRPF3</u>     | 0 | 0 | 0 | 0 | 0 | 0 | 1 | 0 | 0 | 0 | 1 |
| <u>PRDM9</u>     | 0 | 0 | 0 | 0 | 0 | 0 | 1 | 0 | 0 | 0 | 1 |
| <u>RYBP</u>      | 0 | 0 | 0 | 0 | 0 | 0 | 1 | 0 | 0 | 0 | 1 |
| <u>TYW3</u>      | 0 | 0 | 0 | 0 | 0 | 0 | 1 | 0 | 0 | 0 | 1 |
| <u>TLR1</u>      | 0 | 0 | 0 | 0 | 0 | 0 | 1 | 0 | 0 | 0 | 1 |
| <u>SLITRK6</u>   | 0 | 0 | 0 | 0 | 0 | 0 | 1 | 0 | 0 | 0 | 1 |
| <u>HOXB3</u>     | 0 | 0 | 0 | 0 | 0 | 0 | 1 | 0 | 0 | 0 | 1 |
| <u>DPP4</u>      | 0 | 0 | 0 | 0 | 0 | 0 | 1 | 0 | 0 | 0 | 1 |
| <u>SLC12A4</u>   | 0 | 0 | 0 | 0 | 0 | 0 | 1 | 0 | 0 | 0 | 1 |
| <u>AKAP13</u>    | 0 | 0 | 0 | 0 | 0 | 0 | 1 | 0 | 0 | 0 | 1 |
| <u>IGSF9B</u>    | 0 | 0 | 0 | 0 | 0 | 0 | 1 | 0 | 0 | 0 | 1 |
| <u>PDCD7</u>     | 0 | 0 | 0 | 0 | 0 | 0 | 1 | 0 | 0 | 0 | 1 |
| <u>DNAJC12</u>   | 0 | 0 | 0 | 0 | 0 | 0 | 1 | 0 | 0 | 0 | 1 |
| <u>PABPN1</u>    | 0 | 0 | 0 | 0 | 0 | 0 | 1 | 0 | 0 | 0 | 1 |
| <u>RFWD3</u>     | 0 | 0 | 0 | 0 | 0 | 0 | 1 | 0 | 0 | 0 | 1 |
| <u>KIF18A</u>    | 0 | 0 | 0 | 0 | 0 | 0 | 1 | 0 | 0 | 0 | 1 |
| <u>DAPK2</u>     | 0 | 0 | 0 | 0 | 0 | 0 | 1 | 0 | 0 | 0 | 1 |
| <u>ATF3</u>      | 0 | 0 | 0 | 0 | 0 | 0 | 1 | 0 | 0 | 0 | 1 |
| <u>PPIL2</u>     | 0 | 0 | 0 | 0 | 0 | 0 | 1 | 0 | 0 | 0 | 1 |
| <u>NDUFA10</u>   | 0 | 0 | 0 | 0 | 0 | 0 | 1 | 0 | 0 | 0 | 1 |
| <u>PEX14</u>     | 0 | 0 | 0 | 0 | 0 | 0 | 1 | 0 | 0 | 0 | 1 |
| <u>CPNE8</u>     | 0 | 0 | 0 | 0 | 0 | 0 | 1 | 0 | 0 | 0 | 1 |
| <u>CEACAM7</u>   | 0 | 0 | 0 | 0 | 0 | 0 | 1 | 0 | 0 | 0 | 1 |
| <u>IL8RA</u>     | 0 | 0 | 0 | 0 | 0 | 0 | 1 | 0 | 0 | 0 | 1 |
| <u>LRRC25</u>    | 0 | 0 | 0 | 0 | 0 | 0 | 1 | 0 | 0 | 0 | 1 |

|                 |   |   |   |   |   |   |   |   |   |   |   |
|-----------------|---|---|---|---|---|---|---|---|---|---|---|
| <u>CSNK1E</u>   | 0 | 0 | 0 | 0 | 0 | 0 | 1 | 0 | 0 | 0 | 1 |
| <u>PRKDC</u>    | 0 | 0 | 0 | 0 | 0 | 0 | 1 | 0 | 0 | 0 | 1 |
| <u>CNN2</u>     | 0 | 0 | 0 | 0 | 0 | 0 | 1 | 0 | 0 | 0 | 1 |
| <u>ZNF410</u>   | 0 | 0 | 0 | 0 | 0 | 0 | 1 | 0 | 0 | 0 | 1 |
| <u>MIZF</u>     | 0 | 0 | 0 | 0 | 0 | 0 | 1 | 0 | 0 | 0 | 1 |
| <u>MYBPC3</u>   | 0 | 0 | 0 | 0 | 0 | 0 | 1 | 0 | 0 | 0 | 1 |
| <u>SPAG11B</u>  | 0 | 0 | 0 | 0 | 0 | 0 | 1 | 0 | 0 | 0 | 1 |
| <u>CYB5R2</u>   | 0 | 0 | 0 | 0 | 0 | 0 | 0 | 1 | 0 | 0 | 1 |
| <u>MYOZ3</u>    | 0 | 0 | 0 | 0 | 0 | 0 | 0 | 1 | 0 | 0 | 1 |
| <u>RBBP9</u>    | 0 | 0 | 0 | 0 | 0 | 0 | 0 | 1 | 0 | 0 | 1 |
| <u>WDR91</u>    | 0 | 0 | 0 | 0 | 0 | 0 | 0 | 1 | 0 | 0 | 1 |
| <u>RNF165</u>   | 0 | 0 | 0 | 0 | 0 | 0 | 0 | 1 | 0 | 0 | 1 |
| <u>SNX20</u>    | 0 | 0 | 0 | 0 | 0 | 0 | 0 | 1 | 0 | 0 | 1 |
| <u>NLRP3</u>    | 0 | 0 | 0 | 0 | 0 | 0 | 0 | 1 | 0 | 0 | 1 |
| <u>SSPO</u>     | 0 | 0 | 0 | 0 | 0 | 0 | 0 | 1 | 0 | 0 | 1 |
| <u>CYP3A7</u>   | 0 | 0 | 0 | 0 | 0 | 0 | 0 | 1 | 0 | 0 | 1 |
| <u>MAST3</u>    | 0 | 0 | 0 | 0 | 0 | 0 | 0 | 1 | 0 | 0 | 1 |
| <u>TRIM14</u>   | 0 | 0 | 0 | 0 | 0 | 0 | 0 | 1 | 0 | 0 | 1 |
| <u>CYP11B2</u>  | 0 | 0 | 0 | 0 | 0 | 0 | 0 | 1 | 0 | 0 | 1 |
| <u>VPS37D</u>   | 0 | 0 | 0 | 0 | 0 | 0 | 0 | 1 | 0 | 0 | 1 |
| <u>SLC18A2</u>  | 0 | 0 | 0 | 0 | 0 | 0 | 0 | 1 | 0 | 0 | 1 |
| <u>MCAM</u>     | 0 | 0 | 0 | 0 | 0 | 0 | 0 | 1 | 0 | 0 | 1 |
| <u>TMED8</u>    | 0 | 0 | 0 | 0 | 0 | 0 | 0 | 1 | 0 | 0 | 1 |
| <u>ZMYM3</u>    | 0 | 0 | 0 | 0 | 0 | 0 | 0 | 1 | 0 | 0 | 1 |
| <u>HGS</u>      | 0 | 0 | 0 | 0 | 0 | 0 | 0 | 1 | 0 | 0 | 1 |
| <u>NECAP1</u>   | 0 | 0 | 0 | 0 | 0 | 0 | 0 | 1 | 0 | 0 | 1 |
| <u>SLC37A2</u>  | 0 | 0 | 0 | 0 | 0 | 0 | 0 | 1 | 0 | 0 | 1 |
| <u>TRPC5</u>    | 0 | 0 | 0 | 0 | 0 | 0 | 0 | 1 | 0 | 0 | 1 |
| <u>NTRK1</u>    | 0 | 0 | 0 | 0 | 0 | 0 | 0 | 1 | 0 | 0 | 1 |
| <u>C16orf57</u> | 0 | 0 | 0 | 0 | 0 | 0 | 0 | 1 | 0 | 0 | 1 |
| <u>RABGAP1L</u> | 0 | 0 | 0 | 0 | 0 | 0 | 0 | 1 | 0 | 0 | 1 |
| <u>POLR2E</u>   | 0 | 0 | 0 | 0 | 0 | 0 | 0 | 1 | 0 | 0 | 1 |
| <u>C4orf33</u>  | 0 | 0 | 0 | 0 | 0 | 0 | 0 | 1 | 0 | 0 | 1 |
| <u>PLIN</u>     | 0 | 0 | 0 | 0 | 0 | 0 | 0 | 1 | 0 | 0 | 1 |
| <u>PPIA</u>     | 0 | 0 | 0 | 0 | 0 | 0 | 0 | 1 | 0 | 0 | 1 |
| <u>EXOC4</u>    | 0 | 0 | 0 | 0 | 0 | 0 | 0 | 1 | 0 | 0 | 1 |
| <u>USP11</u>    | 0 | 0 | 0 | 0 | 0 | 0 | 0 | 1 | 0 | 0 | 1 |
| <u>C5orf42</u>  | 0 | 0 | 0 | 0 | 0 | 0 | 0 | 1 | 0 | 0 | 1 |
| <u>SEC14L4</u>  | 0 | 0 | 0 | 0 | 0 | 0 | 0 | 1 | 0 | 0 | 1 |
| <u>KIAA0409</u> | 0 | 0 | 0 | 0 | 0 | 0 | 0 | 1 | 0 | 0 | 1 |
| <u>PARC</u>     | 0 | 0 | 0 | 0 | 0 | 0 | 0 | 1 | 0 | 0 | 1 |









|                |   |   |   |   |   |   |   |   |   |   |   |
|----------------|---|---|---|---|---|---|---|---|---|---|---|
| <u>HFE2</u>    | 0 | 0 | 0 | 0 | 0 | 0 | 0 | 0 | 0 | 1 | 1 |
| <u>EXTL2</u>   | 0 | 0 | 0 | 0 | 0 | 0 | 0 | 0 | 0 | 1 | 1 |
| <u>TRAK1</u>   | 0 | 0 | 0 | 0 | 0 | 0 | 0 | 0 | 0 | 1 | 1 |
| <u>MAPKBP1</u> | 0 | 0 | 0 | 0 | 0 | 0 | 0 | 0 | 0 | 1 | 1 |
| <u>GRK6</u>    | 0 | 0 | 0 | 0 | 0 | 0 | 0 | 0 | 0 | 1 | 1 |
| <u>GTF2I</u>   | 0 | 0 | 0 | 0 | 0 | 0 | 0 | 0 | 0 | 1 | 1 |
| <u>HNRPK</u>   | 0 | 0 | 0 | 0 | 0 | 0 | 0 | 0 | 0 | 1 | 1 |
| <u>LMX1A</u>   | 0 | 0 | 0 | 0 | 0 | 0 | 0 | 0 | 0 | 1 | 1 |
| <u>SMAD9</u>   | 0 | 0 | 0 | 0 | 0 | 0 | 0 | 0 | 0 | 1 | 1 |
| <u>PIK3R1</u>  | 0 | 0 | 0 | 0 | 0 | 0 | 0 | 0 | 0 | 1 | 1 |
| <u>VPS13C</u>  | 0 | 0 | 0 | 0 | 0 | 0 | 0 | 0 | 0 | 1 | 1 |
| <u>PRR5</u>    | 0 | 0 | 0 | 0 | 0 | 0 | 0 | 0 | 0 | 1 | 1 |
| <u>RFX4</u>    | 0 | 0 | 0 | 0 | 0 | 0 | 0 | 0 | 0 | 1 | 1 |
| <u>AFAP1</u>   | 0 | 0 | 0 | 0 | 0 | 0 | 0 | 0 | 0 | 1 | 1 |
| <u>RREB1</u>   | 0 | 0 | 0 | 0 | 0 | 0 | 0 | 0 | 0 | 1 | 1 |
| <u>NFKBIZ</u>  | 0 | 0 | 0 | 0 | 0 | 0 | 0 | 0 | 0 | 1 | 1 |
| <u>STAU1</u>   | 0 | 0 | 0 | 0 | 0 | 0 | 0 | 0 | 0 | 1 | 1 |
| <u>YWHAZ</u>   | 0 | 0 | 0 | 0 | 0 | 0 | 0 | 0 | 0 | 1 | 1 |
| <u>SEMA3B</u>  | 0 | 0 | 0 | 0 | 0 | 0 | 0 | 0 | 0 | 1 | 1 |
| <u>BRCC3</u>   | 0 | 0 | 0 | 0 | 0 | 0 | 0 | 0 | 0 | 1 | 1 |
| <u>CALD1</u>   | 0 | 0 | 0 | 0 | 0 | 0 | 0 | 0 | 0 | 1 | 1 |
| <u>APOLD1</u>  | 0 | 0 | 0 | 0 | 0 | 0 | 0 | 0 | 0 | 1 | 1 |
| <u>CASP1</u>   | 0 | 0 | 0 | 0 | 0 | 0 | 0 | 0 | 0 | 1 | 1 |
| <u>MAP4K4</u>  | 0 | 0 | 0 | 0 | 0 | 0 | 0 | 0 | 0 | 1 | 1 |
| <u>VGLL4</u>   | 0 | 0 | 0 | 0 | 0 | 0 | 0 | 0 | 0 | 1 | 1 |
| <u>HDAC9</u>   | 0 | 0 | 0 | 0 | 0 | 0 | 0 | 0 | 0 | 1 | 1 |

0 = not predicted; 1 = predicted

**Supplementary Table 20. Predicted genes of hsa-miR-181a by miRWALK.**

| Gene           | RefseqID            | Seed Length | Start | Sequence   | End   | Region | P value | SPMS |
|----------------|---------------------|-------------|-------|------------|-------|--------|---------|------|
| <u>AASS</u>    | <u>NM_005763</u>    | 9           | 5809  | AACAUUCA   | 5801  | 3 UTR  | 0.0112  | 1    |
| <u>ABCB11</u>  | <u>NM_003742</u>    | 8           | 5808  | ACAUUCA    | 5801  | 3 UTR  | 0.0442  | 2    |
| <u>ABI1</u>    | <u>NM_005470</u>    | 7           | 4210  | AACAUUC    | 4204  | 3 UTR  | 0.0408  | 1    |
| <u>ABLIM1</u>  | <u>NM_001003408</u> | 8           | 1831  | ACAUUCA    | 1824  | 3 UTR  | 0.0297  | 2    |
| <u>ACBD4</u>   | <u>NM_024722</u>    | 9           | 3780  | AACAUUCA   | 3772  | 3 UTR  | 0.0195  | 1    |
| <u>ACBD6</u>   | <u>NM_032360</u>    | 7           | 1997  | AACAUUC    | 1991  | 3 UTR  | 0.0378  | 1    |
| <u>ACMSD</u>   | <u>NM_138326</u>    | 7           | 1181  | ACAUUCA    | 1175  | 3 UTR  | 0.0098  | 2    |
| <u>ACN9</u>    | <u>NM_020186</u>    | 7           | 1193  | ACAUUCA    | 1187  | 3 UTR  | 0.0121  | 2    |
| <u>ACRC</u>    | <u>NM_052957</u>    | 7           | 1950  | ACAUUCA    | 1944  | 3 UTR  | 0.0335  | 2    |
| <u>ACSF3</u>   | <u>NM_174917</u>    | 7           | 2439  | ACAUUCA    | 2433  | 3 UTR  | 0.0360  | 2    |
| <u>ACSL1</u>   | <u>NM_001995</u>    | 8           | 2964  | AACAUUCA   | 2957  | 3 UTR  | 0.0234  | 1    |
| <u>ACSS3</u>   | <u>NM_024560</u>    | 9           | 3707  | AACAUUCA   | 3699  | 3 UTR  | 0.0059  | 1    |
| <u>ACTA2</u>   | <u>NM_001613</u>    | 8           | 3706  | ACAUUCA    | 3699  | 3 UTR  | 0.0233  | 2    |
| <u>ACTC1</u>   | <u>NM_005159</u>    | 8           | 2386  | ACAUUCA    | 2379  | 3 UTR  | 0.0134  | 2    |
| <u>ACTL6A</u>  | <u>NM_178042</u>    | 7           | 1296  | ACAUUCA    | 1290  | 3 UTR  | 0.0100  | 2    |
| <u>ACTR2</u>   | <u>NM_001005386</u> | 8           | 2322  | ACAUUCA    | 2315  | 3 UTR  | 0.0347  | 2    |
| <u>ACVR2B</u>  | <u>NM_001106</u>    | 7           | 1606  | AACAUUC    | 1600  | 3 UTR  | 0.0268  | 1    |
| <u>ACYP1</u>   | <u>NM_203488</u>    | 8           | 3392  | ACAUUCA    | 3385  | 3 UTR  | 0.0379  | 2    |
| <u>ADAM28</u>  | <u>NM_014265</u>    | 9           | 6762  | AACAUUCA   | 6754  | 3 UTR  | 0.0367  | 1    |
| <u>ADAMTS8</u> | <u>NM_007037</u>    | 9           | 595   | AACAUUCA   | 587   | 3 UTR  | 0.0017  | 1    |
| <u>ADCY9</u>   | <u>NM_001116</u>    | 8           | 594   | ACAUUCA    | 587   | 3 UTR  | 0.0068  | 2    |
| <u>ADH4</u>    | <u>NM_000670</u>    | 8           | 3159  | ACAUUCA    | 3152  | 3 UTR  | 0.0123  | 2    |
| <u>ADM</u>     | <u>NM_001124</u>    | 7           | 3461  | ACAUUCA    | 3455  | 3 UTR  | 0.0390  | 2    |
| <u>ADRBK1</u>  | <u>NM_001619</u>    | 8           | 7161  | ACAUUCA    | 7154  | 3 UTR  | 0.0467  | 2    |
| <u>AFF2</u>    | <u>NM_002025</u>    | 8           | 6628  | ACAUUCA    | 6621  | 3 UTR  | 0.0467  | 2    |
| <u>AGPAT5</u>  | <u>NM_018361</u>    | 8           | 1259  | ACAUUCA    | 1252  | 3 UTR  | 0.0115  | 2    |
| <u>AGT</u>     | <u>NM_000029</u>    | 7           | 1296  | ACAUUCA    | 1290  | 3 UTR  | 0.0439  | 2    |
| <u>AGXT</u>    | <u>NM_000030</u>    | 8           | 3388  | ACAUUCA    | 3381  | 3 UTR  | 0.0173  | 2    |
| <u>AHR</u>     | <u>NM_001621</u>    | 10          | 10612 | AACAUUCAAC | 10603 | 3 UTR  | 0.0089  | 1    |
| <u>AICDA</u>   | <u>NM_020661</u>    | 9           | 10611 | ACAUUCAAC  | 10603 | 3 UTR  | 0.0350  | 2    |
| <u>AIM1L</u>   | <u>NM_001039775</u> | 9           | 3349  | AACAUUCA   | 3341  | 3 UTR  | 0.0156  | 1    |
| <u>AK3</u>     | <u>NM_016282</u>    | 8           | 2405  | ACAUUCA    | 2398  | 3 UTR  | 0.0094  | 2    |
| <u>AKAP4</u>   | <u>NM_003886</u>    | 7           | 1570  | AACAUUC    | 1564  | 3 UTR  | 0.0188  | 1    |
| <u>AKAP6</u>   | <u>NM_004274</u>    | 10          | 4126  | AACAUUCAAC | 4117  | 3 UTR  | 0.0026  | 1    |
| <u>AKAP7</u>   | <u>NM_016377</u>    | 9           | 4125  | ACAUUCAAC  | 4117  | 3 UTR  | 0.0102  | 2    |
| <u>AKAP9</u>   | <u>NM_147171</u>    | 9           | 1532  | AACAUUCA   | 1524  | 3 UTR  | 0.0080  | 1    |
| <u>AKT3</u>    | <u>NM_005465</u>    | 8           | 1531  | ACAUUCA    | 1524  | 3 UTR  | 0.0318  | 2    |
| <u>ALDH9A1</u> | <u>NM_000696</u>    | 8           | 2332  | AACAUUCA   | 2325  | 3 UTR  | 0.0017  | 1    |

|                 |                     |    |       |            |       |       |        |   |
|-----------------|---------------------|----|-------|------------|-------|-------|--------|---|
| <u>ALG10</u>    | <u>NM_032834</u>    | 7  | 2331  | ACAUUCA    | 2325  | 3 UTR | 0.0066 | 2 |
| <u>ALG2</u>     | <u>NM_033087</u>    | 9  | 2415  | AACAUUCA   | 2407  | 3 UTR | 0.0069 | 1 |
| <u>ALG6</u>     | <u>NM_013339</u>    | 8  | 2414  | ACAUUCA    | 2407  | 3 UTR | 0.0274 | 2 |
| <u>ALS2CR12</u> | <u>NM_139163</u>    | 7  | 2827  | ACAUUCA    | 2821  | 3 UTR | 0.0117 | 2 |
| <u>AMAC1</u>    | <u>NM_152462</u>    | 8  | 10232 | AACAUUCA   | 10225 | 3 UTR | 0.0488 | 1 |
| <u>ANKLE1</u>   | <u>NM_152363</u>    | 9  | 2321  | AACAUUCA   | 2313  | 3 UTR | 0.0070 | 1 |
| <u>ANKRD13C</u> | <u>NM_030816</u>    | 8  | 2320  | ACAUUCA    | 2313  | 3 UTR | 0.0275 | 2 |
| <u>ANKRD27</u>  | <u>NM_032139</u>    | 7  | 12279 | ACAUUCA    | 12273 | 3 UTR | 0.0310 | 2 |
| <u>ANKRD50</u>  | <u>NM_020337</u>    | 8  | 2506  | ACAUUCA    | 2499  | 3 UTR | 0.0310 | 2 |
| <u>ANP32A</u>   | <u>NM_006305</u>    | 8  | 1748  | AACAUUCA   | 1741  | 3 UTR | 0.0127 | 1 |
| <u>ANTXR2</u>   | <u>NM_058172</u>    | 7  | 2312  | ACAUUCA    | 2306  | 3 UTR | 0.0499 | 2 |
| <u>ANXA11</u>   | <u>NM_145869</u>    | 7  | 1747  | ACAUUCA    | 1741  | 3 UTR | 0.0499 | 2 |
| <u>ANXA6</u>    | <u>NM_001155</u>    | 8  | 2815  | ACAUUCA    | 2808  | 3 UTR | 0.0212 | 2 |
| <u>AP3D1</u>    | <u>NM_003938</u>    | 8  | 1450  | ACAUUCA    | 1443  | 3 UTR | 0.0228 | 2 |
| <u>AP3S2</u>    | <u>NM_005829</u>    | 7  | 3264  | AACAUUC    | 3258  | 3 UTR | 0.0128 | 1 |
| <u>APH1B</u>    | <u>NM_031301</u>    | 7  | 1916  | ACAUUCA    | 1910  | 3 UTR | 0.0140 | 2 |
| <u>API5</u>     | <u>NM_006595</u>    | 7  | 1562  | ACAUUCA    | 1556  | 3 UTR | 0.0460 | 2 |
| <u>APOO</u>     | <u>NM_024122</u>    | 9  | 2171  | AACAUUCA   | 2163  | 3 UTR | 0.0042 | 1 |
| <u>AQP9</u>     | <u>NM_020980</u>    | 8  | 2170  | ACAUUCA    | 2163  | 3 UTR | 0.0165 | 2 |
| <u>ARF6</u>     | <u>NM_001663</u>    | 9  | 2480  | AACAUUCA   | 2472  | 3 UTR | 0.0141 | 1 |
| <u>ARFGEF2</u>  | <u>NM_006420</u>    | 8  | 4037  | ACAUUCA    | 4030  | 3 UTR | 0.0174 | 2 |
| <u>ARFIP1</u>   | <u>NM_001025595</u> | 8  | 7193  | AACAUUCA   | 7186  | 3 UTR | 0.0478 | 1 |
| <u>ARHGAP12</u> | <u>NM_018287</u>    | 8  | 6365  | AACAUUCA   | 6358  | 3 UTR | 0.0478 | 1 |
| <u>ARHGEF12</u> | <u>NM_015313</u>    | 7  | 2444  | AACAUUC    | 2438  | 3 UTR | 0.0153 | 1 |
| <u>ARHGEF15</u> | <u>NM_173728</u>    | 7  | 1914  | ACAUUCA    | 1908  | 3 UTR | 0.0153 | 2 |
| <u>ARHGEF3</u>  | <u>NM_001128616</u> | 8  | 2532  | ACAUUCA    | 2525  | 3 UTR | 0.0282 | 2 |
| <u>ARID2</u>    | <u>NM_152641</u>    | 7  | 2668  | ACAUUCA    | 2662  | 3 UTR | 0.0436 | 2 |
| <u>ARIH1</u>    | <u>NM_005744</u>    | 9  | 2572  | ACAUUCAAC  | 2564  | 3 UTR | 0.0028 | 2 |
| <u>ARL1</u>     | <u>NM_001177</u>    | 8  | 3989  | ACAUUCA    | 3982  | 3 UTR | 0.0178 | 2 |
| <u>ARL11</u>    | <u>NM_138450</u>    | 9  | 3487  | AACAUUCA   | 3479  | 3 UTR | 0.0186 | 1 |
| <u>ARL5A</u>    | <u>NM_012097</u>    | 7  | 2429  | AACAUUC    | 2423  | 3 UTR | 0.0081 | 1 |
| <u>ARL6</u>     | <u>NM_032146</u>    | 7  | 1282  | ACAUUCA    | 1276  | 3 UTR | 0.0081 | 2 |
| <u>ARL6IP6</u>  | <u>NM_152522</u>    | 9  | 3008  | AACAUUCA   | 3000  | 3 UTR | 0.0079 | 1 |
| <u>ARMC1</u>    | <u>NM_018120</u>    | 8  | 3007  | ACAUUCA    | 3000  | 3 UTR | 0.0314 | 2 |
| <u>ARNT2</u>    | <u>NM_014862</u>    | 8  | 936   | ACAUUCA    | 929   | 3 UTR | 0.0047 | 2 |
| <u>ARPC1A</u>   | <u>NM_006409</u>    | 10 | 2372  | AACAUUCAAC | 2363  | 3 UTR | 0.0017 | 1 |
| <u>ARRB2</u>    | <u>NM_004313</u>    | 9  | 2371  | ACAUUCAAC  | 2363  | 3 UTR | 0.0068 | 2 |
| <u>ARSJ</u>     | <u>NM_024590</u>    | 9  | 3474  | AACAUUCA   | 3466  | 3 UTR | 0.0106 | 1 |
| <u>ARV1</u>     | <u>NM_022786</u>    | 8  | 3473  | ACAUUCA    | 3466  | 3 UTR | 0.0417 | 2 |
| <u>ASAH1</u>    | <u>NM_014435</u>    | 9  | 5991  | AACAUUCA   | 5983  | 3 UTR | 0.0132 | 1 |
| <u>ASB3</u>     | <u>NM_016115</u>    | 8  | 2428  | AACAUUCA   | 2421  | 3 UTR | 0.0255 | 1 |

|                 |                     |    |      |            |      |       |        |   |
|-----------------|---------------------|----|------|------------|------|-------|--------|---|
| <u>ASB5</u>     | <u>NM_080874</u>    | 8  | 3046 | AACAUUCA   | 3039 | 3 UTR | 0.0206 | 1 |
| <u>ASCC1</u>    | <u>NM_015947</u>    | 9  | 6987 | AACAUUCA   | 6979 | 3 UTR | 0.0184 | 1 |
| <u>ASTN1</u>    | <u>NM_004319</u>    | 8  | 2852 | ACAUUCA    | 2845 | 3 UTR | 0.0243 | 2 |
| <u>ATG10</u>    | <u>NM_001131028</u> | 8  | 3993 | AACAUUCA   | 3986 | 3 UTR | 0.0280 | 1 |
| <u>ATG5</u>     | <u>NM_004849</u>    | 8  | 3976 | AACAUUCA   | 3969 | 3 UTR | 0.0280 | 1 |
| <u>ATM</u>      | <u>NM_000051</u>    | 8  | 6281 | AACAUUCA   | 6274 | 3 UTR | 0.0441 | 1 |
| <u>ATMIN</u>    | <u>NM_015251</u>    | 8  | 3881 | AACAUUCA   | 3874 | 3 UTR | 0.0488 | 1 |
| <u>ATP11B</u>   | <u>NM_014616</u>    | 8  | 890  | AACAUUCA   | 883  | 3 UTR | 0.0375 | 1 |
| <u>ATP11C</u>   | <u>NM_173694</u>    | 8  | 2369 | AACAUUCA   | 2362 | 3 UTR | 0.0383 | 1 |
| <u>ATP1B1</u>   | <u>NM_001677</u>    | 10 | 1205 | AACAUUCAAC | 1196 | 3 UTR | 0.0022 | 1 |
| <u>ATP2B1</u>   | <u>NM_001001323</u> | 9  | 1204 | ACAUUCAAC  | 1196 | 3 UTR | 0.0088 | 2 |
| <u>ATP2B3</u>   | <u>NM_021949</u>    | 7  | 1179 | AACAUUC    | 1173 | 3 UTR | 0.0297 | 1 |
| <u>ATP6AP2</u>  | <u>NM_005765</u>    | 8  | 2703 | AACAUUCA   | 2696 | 3 UTR | 0.0214 | 1 |
| <u>ATP6V1C2</u> | <u>NM_001039362</u> | 8  | 1799 | ACAUUCA    | 1792 | 3 UTR | 0.0237 | 2 |
| <u>ATP8B1</u>   | <u>NM_005603</u>    | 9  | 6455 | AACAUUCA   | 6447 | 3 UTR | 0.0161 | 1 |
| <u>ATPAF1</u>   | <u>NM_022745</u>    | 7  | 1591 | ACAUUCA    | 1585 | 3 UTR | 0.0217 | 2 |
| <u>ATPAF2</u>   | <u>NM_145691</u>    | 7  | 1649 | ACAUUCA    | 1643 | 3 UTR | 0.0288 | 2 |
| <u>ATXN3</u>    | <u>NM_004993</u>    | 8  | 3648 | ACAUUCA    | 3641 | 3 UTR | 0.0301 | 2 |
| <u>ATXN7</u>    | <u>NM_001128149</u> | 7  | 1096 | AACAUUC    | 1090 | 3 UTR | 0.0363 | 1 |
| <u>AUTS2</u>    | <u>NM_015570</u>    | 8  | 1630 | ACAUUCA    | 1623 | 3 UTR | 0.0112 | 2 |
| <u>B3GALT1</u>  | <u>NM_020981</u>    | 7  | 1851 | AACAUUC    | 1845 | 3 UTR | 0.0314 | 1 |
| <u>B3GALT5</u>  | <u>NM_033173</u>    | 9  | 1514 | ACAUUCAAC  | 1506 | 3 UTR | 0.0073 | 2 |
| <u>B4GALT6</u>  | <u>NM_004775</u>    | 7  | 1886 | AACAUUC    | 1880 | 3 UTR | 0.0493 | 1 |
| <u>BAG2</u>     | <u>NM_004282</u>    | 8  | 7033 | ACAUUCA    | 7026 | 3 UTR | 0.0481 | 2 |
| <u>BAG4</u>     | <u>NM_004874</u>    | 8  | 1273 | AACAUUCA   | 1266 | 3 UTR | 0.0202 | 1 |
| <u>BAI3</u>     | <u>NM_001704</u>    | 9  | 2381 | AACAUUCA   | 2373 | 3 UTR | 0.0078 | 1 |
| <u>BANK1</u>    | <u>NM_017935</u>    | 8  | 2380 | ACAUUCA    | 2373 | 3 UTR | 0.0310 | 2 |
| <u>BBS9</u>     | <u>NM_198428</u>    | 9  | 9686 | AACAUUCA   | 9678 | 3 UTR | 0.0136 | 1 |
| <u>BCL11A</u>   | <u>NM_022893</u>    | 8  | 2585 | ACAUUCA    | 2578 | 3 UTR | 0.0356 | 2 |
| <u>BCL6B</u>    | <u>NM_181844</u>    | 9  | 7059 | AACAUUCA   | 7051 | 3 UTR | 0.0136 | 1 |
| <u>BIRC6</u>    | <u>NM_016252</u>    | 8  | 4586 | AACAUUCA   | 4579 | 3 UTR | 0.0394 | 1 |
| <u>BMS1</u>     | <u>NM_014753</u>    | 8  | 1907 | AACAUUCA   | 1900 | 3 UTR | 0.0178 | 1 |
| <u>BPTF</u>     | <u>NM_182641</u>    | 8  | 4014 | AACAUUCA   | 4007 | 3 UTR | 0.0482 | 1 |
| <u>BRAP</u>     | <u>NM_006768</u>    | 8  | 4713 | ACAUUCA    | 4706 | 3 UTR | 0.0439 | 2 |
| <u>BRD1</u>     | <u>NM_014577</u>    | 9  | 1160 | AACAUUCA   | 1152 | 3 UTR | 0.0034 | 1 |
| <u>BTBD10</u>   | <u>NM_032320</u>    | 8  | 1159 | ACAUUCA    | 1152 | 3 UTR | 0.0135 | 2 |
| <u>BTBD3</u>    | <u>NM_014962</u>    | 9  | 1583 | AACAUUCA   | 1575 | 3 UTR | 0.0071 | 1 |
| <u>BTRC</u>     | <u>NM_033637</u>    | 8  | 1582 | ACAUUCA    | 1575 | 3 UTR | 0.0279 | 2 |
| <u>BUB3</u>     | <u>NM_004725</u>    | 8  | 5400 | AACAUUCA   | 5393 | 3 UTR | 0.0310 | 1 |
| <u>C10orf30</u> | <u>NM_152751</u>    | 8  | 2964 | AACAUUCA   | 2957 | 3 UTR | 0.0454 | 1 |
| <u>C10orf4</u>  | <u>NM_145246</u>    | 7  | 1242 | ACAUUCA    | 1236 | 3 UTR | 0.0318 | 2 |

|                  |                     |    |       |            |       |       |        |   |
|------------------|---------------------|----|-------|------------|-------|-------|--------|---|
| <u>C10orf67</u>  | <u>NM_153714</u>    | 9  | 2543  | AACAUUCA   | 2535  | 3 UTR | 0.0218 | 1 |
| <u>C10orf68</u>  | <u>NM_024688</u>    | 9  | 6474  | AACAUUCA   | 6466  | 3 UTR | 0.0148 | 1 |
| <u>C10orf78</u>  | <u>NM_145247</u>    | 8  | 5139  | AACAUUCA   | 5132  | 3 UTR | 0.0286 | 1 |
| <u>C10orf83</u>  | <u>NM_178832</u>    | 8  | 1495  | AACAUUCA   | 1488  | 3 UTR | 0.0127 | 1 |
| <u>C10orf88</u>  | <u>NM_024942</u>    | 7  | 1494  | ACAUUCA    | 1488  | 3 UTR | 0.0497 | 2 |
| <u>C11orf30</u>  | <u>NM_020193</u>    | 8  | 3118  | ACAUUCA    | 3111  | 3 UTR | 0.0211 | 2 |
| <u>C11orf47</u>  | <u>NM_173589</u>    | 9  | 2612  | AACAUUCA   | 2604  | 3 UTR | 0.0128 | 1 |
| <u>C11orf53</u>  | <u>NM_198498</u>    | 7  | 1584  | ACAUUCA    | 1578  | 3 UTR | 0.0454 | 2 |
| <u>C11orf56</u>  | <u>NM_032127</u>    | 7  | 1860  | ACAUUCA    | 1854  | 3 UTR | 0.0316 | 2 |
| <u>C11orf61</u>  | <u>NM_024631</u>    | 8  | 5449  | AACAUUCA   | 5442  | 3 UTR | 0.0096 | 1 |
| <u>C11orf75</u>  | <u>NM_020179</u>    | 7  | 5448  | ACAUUCA    | 5442  | 3 UTR | 0.0379 | 2 |
| <u>C12orf12</u>  | <u>NM_152638</u>    | 9  | 3364  | AACAUUCA   | 3356  | 3 UTR | 0.0031 | 1 |
| <u>C12orf35</u>  | <u>NM_018169</u>    | 8  | 3363  | ACAUUCA    | 3356  | 3 UTR | 0.0125 | 2 |
| <u>C12orf56</u>  | <u>NM_001099676</u> | 8  | 3698  | ACAUUCA    | 3691  | 3 UTR | 0.0128 | 2 |
| <u>C13orf23</u>  | <u>NM_025138</u>    | 8  | 3774  | ACAUUCA    | 3767  | 3 UTR | 0.0478 | 2 |
| <u>C14orf126</u> | <u>NM_080664</u>    | 9  | 2721  | AACAUUCA   | 2713  | 3 UTR | 0.0077 | 1 |
| <u>C14orf135</u> | <u>NM_022495</u>    | 8  | 2625  | AACAUUCA   | 2618  | 3 UTR | 0.0306 | 1 |
| <u>C14orf142</u> | <u>NM_032490</u>    | 8  | 2720  | ACAUUCA    | 2713  | 3 UTR | 0.0306 | 2 |
| <u>C14orf169</u> | <u>NM_024644</u>    | 8  | 15020 | AACAUUCA   | 15013 | 3 UTR | 0.0153 | 1 |
| <u>C14orf178</u> | <u>NM_174943</u>    | 7  | 6231  | AACAUUC    | 6225  | 3 UTR | 0.0195 | 1 |
| <u>C14orf28</u>  | <u>NM_001017923</u> | 8  | 9710  | ACAUUCA    | 9703  | 3 UTR | 0.0314 | 2 |
| <u>C14orf43</u>  | <u>NM_194278</u>    | 9  | 2517  | AACAUUCA   | 2509  | 3 UTR | 0.0079 | 1 |
| <u>C15orf2</u>   | <u>NM_018958</u>    | 8  | 2516  | ACAUUCA    | 2509  | 3 UTR | 0.0311 | 2 |
| <u>C15orf26</u>  | <u>NM_173528</u>    | 9  | 3955  | AACAUUCA   | 3947  | 3 UTR | 0.0036 | 1 |
| <u>C15orf48</u>  | <u>NM_032413</u>    | 8  | 3954  | ACAUUCA    | 3947  | 3 UTR | 0.0144 | 2 |
| <u>C15orf56</u>  | <u>NM_001039905</u> | 7  | 2320  | ACAUUCA    | 2314  | 3 UTR | 0.0497 | 2 |
| <u>C16orf71</u>  | <u>NM_139170</u>    | 10 | 4765  | AACAUUCAAC | 4756  | 3 UTR | 0.0028 | 1 |
| <u>C16orf75</u>  | <u>NM_152308</u>    | 9  | 4764  | ACAUUCAAC  | 4756  | 3 UTR | 0.0111 | 2 |
| <u>C17orf39</u>  | <u>NM_024052</u>    | 10 | 4123  | AACAUUCAAC | 4114  | 3 UTR | 0.0040 | 1 |
| <u>C17orf51</u>  | <u>NM_001113434</u> | 9  | 4122  | ACAUUCAAC  | 4114  | 3 UTR | 0.0160 | 2 |
| <u>C17orf59</u>  | <u>NM_017622</u>    | 9  | 2763  | AACAUUCA   | 2755  | 3 UTR | 0.0059 | 1 |
| <u>C18orf37</u>  | <u>NM_001098817</u> | 8  | 2762  | ACAUUCA    | 2755  | 3 UTR | 0.0234 | 2 |
| <u>C19orf2</u>   | <u>NM_003796</u>    | 7  | 2387  | AACAUUC    | 2381  | 3 UTR | 0.0421 | 1 |
| <u>C19orf25</u>  | <u>NM_152482</u>    | 8  | 2136  | ACAUUCA    | 2129  | 3 UTR | 0.0190 | 2 |
| <u>C19orf42</u>  | <u>NM_024104</u>    | 8  | 1093  | AACAUUCA   | 1086  | 3 UTR | 0.0348 | 1 |
| <u>C19orf59</u>  | <u>NM_174918</u>    | 7  | 2552  | ACAUUCA    | 2546  | 3 UTR | 0.0223 | 2 |
| <u>C1orf109</u>  | <u>NM_017850</u>    | 7  | 1383  | ACAUUCA    | 1377  | 3 UTR | 0.0416 | 2 |
| <u>C1orf113</u>  | <u>NM_024676</u>    | 8  | 2308  | ACAUUCA    | 2301  | 3 UTR | 0.0260 | 2 |
| <u>C1orf131</u>  | <u>NM_152379</u>    | 8  | 2957  | ACAUUCA    | 2950  | 3 UTR | 0.0232 | 2 |
| <u>C1orf161</u>  | <u>NM_152367</u>    | 8  | 4439  | AACAUUCA   | 4432  | 3 UTR | 0.0212 | 1 |
| <u>C1orf2</u>    | <u>NM_006589</u>    | 7  | 2819  | AACAUUC    | 2813  | 3 UTR | 0.0457 | 1 |



|                 |                     |   |      |          |      |       |        |   |
|-----------------|---------------------|---|------|----------|------|-------|--------|---|
| <u>C1orf27</u>  | <u>NM_017847</u>    | 7 | 1045 | AACAUUC  | 1039 | 3 UTR | 0.0150 | 1 |
| <u>C1orf43</u>  | <u>NM_001098616</u> | 8 | 3438 | AACAUUCA | 3431 | 3 UTR | 0.0028 | 1 |
| <u>C1orf50</u>  | <u>NM_024097</u>    | 7 | 3437 | ACAUUCA  | 3431 | 3 UTR | 0.0113 | 2 |
| <u>C1orf52</u>  | <u>NM_198077</u>    | 7 | 1551 | ACAUUCA  | 1545 | 3 UTR | 0.0421 | 2 |
| <u>C1orf71</u>  | <u>NM_152609</u>    | 7 | 638  | ACAUUCA  | 632  | 3 UTR | 0.0325 | 2 |
| <u>C1orf84</u>  | <u>NM_001012961</u> | 8 | 2890 | AACAUUCA | 2883 | 3 UTR | 0.0200 | 1 |
| <u>C1RL</u>     | <u>NM_016546</u>    | 7 | 6081 | ACAUUCA  | 6075 | 3 UTR | 0.0353 | 2 |
| <u>C20orf24</u> | <u>NM_018840</u>    | 9 | 1529 | AACAUUCA | 1521 | 3 UTR | 0.0009 | 1 |
| <u>C20orf85</u> | <u>NM_178456</u>    | 8 | 1528 | ACAUUCA  | 1521 | 3 UTR | 0.0038 | 2 |
| <u>C22orf28</u> | <u>NM_014306</u>    | 8 | 4508 | AACAUUCA | 4501 | 3 UTR | 0.0229 | 1 |
| <u>C2orf29</u>  | <u>NM_017546</u>    | 8 | 1982 | AACAUUCA | 1975 | 3 UTR | 0.0317 | 1 |
| <u>C2orf42</u>  | <u>NM_017880</u>    | 8 | 3846 | AACAUUCA | 3839 | 3 UTR | 0.0093 | 1 |
| <u>C2orf43</u>  | <u>NM_021925</u>    | 7 | 3845 | ACAUUCA  | 3839 | 3 UTR | 0.0367 | 2 |
| <u>C2orf60</u>  | <u>NM_001039693</u> | 7 | 962  | ACAUUCA  | 956  | 3 UTR | 0.0483 | 2 |
| <u>C3orf14</u>  | <u>NM_020685</u>    | 7 | 2456 | AACAUUC  | 2450 | 3 UTR | 0.0276 | 1 |
| <u>C3orf23</u>  | <u>NM_173826</u>    | 7 | 834  | ACAUUCA  | 828  | 3 UTR | 0.0039 | 2 |
| <u>C3orf35</u>  | <u>NM_178342</u>    | 8 | 1688 | ACAUUCA  | 1681 | 3 UTR | 0.0257 | 2 |
| <u>C3orf58</u>  | <u>NM_173552</u>    | 9 | 8054 | AACAUUCA | 8046 | 3 UTR | 0.0158 | 1 |
| <u>C3orf62</u>  | <u>NM_198562</u>    | 9 | 6322 | AACAUUCA | 6314 | 3 UTR | 0.0155 | 1 |
| <u>C4orf15</u>  | <u>NM_024511</u>    | 8 | 1322 | ACAUUCA  | 1315 | 3 UTR | 0.0101 | 2 |
| <u>C5orf13</u>  | <u>NM_004772</u>    | 8 | 735  | AACAUUCA | 728  | 3 UTR | 0.0068 | 1 |
| <u>C5orf29</u>  | <u>NM_152687</u>    | 7 | 734  | ACAUUCA  | 728  | 3 UTR | 0.0268 | 2 |
| <u>C5orf5</u>   | <u>NM_016603</u>    | 8 | 2112 | AACAUUCA | 2105 | 3 UTR | 0.0244 | 1 |
| <u>C6orf115</u> | <u>NM_021243</u>    | 7 | 2669 | AACAUUC  | 2663 | 3 UTR | 0.0413 | 1 |
| <u>C6orf117</u> | <u>NM_138409</u>    | 9 | 1292 | AACAUUCA | 1284 | 3 UTR | 0.0038 | 1 |
| <u>C6orf128</u> | <u>NM_145316</u>    | 8 | 1291 | ACAUUCA  | 1284 | 3 UTR | 0.0151 | 2 |
| <u>C6orf151</u> | <u>NM_152551</u>    | 9 | 2644 | AACAUUCA | 2636 | 3 UTR | 0.0120 | 1 |
| <u>C6orf190</u> | <u>NM_001010923</u> | 8 | 1211 | AACAUUCA | 1204 | 3 UTR | 0.0471 | 1 |
| <u>C6orf199</u> | <u>NM_145025</u>    | 8 | 2643 | ACAUUCA  | 2636 | 3 UTR | 0.0471 | 2 |
| <u>C6orf223</u> | <u>NM_153246</u>    | 9 | 3482 | AACAUUCA | 3474 | 3 UTR | 0.0102 | 1 |
| <u>C6orf97</u>  | <u>NM_025059</u>    | 8 | 3481 | ACAUUCA  | 3474 | 3 UTR | 0.0403 | 2 |
| <u>C7orf24</u>  | <u>NM_024051</u>    | 7 | 1814 | AACAUUC  | 1808 | 3 UTR | 0.0449 | 1 |
| <u>C8orf32</u>  | <u>NM_018024</u>    | 7 | 935  | AACAUUC  | 929  | 3 UTR | 0.0176 | 1 |
| <u>C8orf53</u>  | <u>NM_032334</u>    | 7 | 2151 | ACAUUCA  | 2145 | 3 UTR | 0.0393 | 2 |
| <u>C8orf59</u>  | <u>NM_001099670</u> | 8 | 1482 | ACAUUCA  | 1475 | 3 UTR | 0.0278 | 2 |
| <u>C9orf126</u> | <u>NM_173690</u>    | 8 | 1261 | AACAUUCA | 1254 | 3 UTR | 0.0169 | 1 |
| <u>C9orf167</u> | <u>NM_017723</u>    | 7 | 916  | ACAUUCA  | 910  | 3 UTR | 0.0440 | 2 |
| <u>C9orf23</u>  | <u>NM_148179</u>    | 8 | 1678 | ACAUUCA  | 1671 | 3 UTR | 0.0237 | 2 |
| <u>C9orf68</u>  | <u>NM_001039395</u> | 8 | 2452 | ACAUUCA  | 2445 | 3 UTR | 0.0209 | 2 |
| <u>CA13</u>     | <u>NM_198584</u>    | 7 | 1130 | ACAUUCA  | 1124 | 3 UTR | 0.0340 | 2 |
| <u>CABC1</u>    | <u>NM_020247</u>    | 9 | 2894 | AACAUUCA | 2886 | 3 UTR | 0.0071 | 1 |

|                  |                     |   |      |           |      |       |        |   |
|------------------|---------------------|---|------|-----------|------|-------|--------|---|
| <u>CACNA2D4</u>  | <u>NM_172364</u>    | 8 | 2893 | ACAUUCA   | 2886 | 3 UTR | 0.0282 | 2 |
| <u>CACNB2</u>    | <u>NM_000724</u>    | 7 | 3125 | AACAUUC   | 3119 | 3 UTR | 0.0357 | 1 |
| <u>CALB1</u>     | <u>NM_004929</u>    | 8 | 2180 | AACAUUCA  | 2173 | 3 UTR | 0.0348 | 1 |
| <u>CALCR</u>     | <u>NM_001742</u>    | 7 | 1762 | AACAUUC   | 1756 | 3 UTR | 0.0452 | 1 |
| <u>CALCRL</u>    | <u>NM_005795</u>    | 7 | 1648 | ACAUUCA   | 1642 | 3 UTR | 0.0452 | 2 |
| <u>CAMK2G</u>    | <u>NM_172171</u>    | 7 | 797  | ACAUUCA   | 791  | 3 UTR | 0.0213 | 2 |
| <u>CAMKK1</u>    | <u>NM_032294</u>    | 9 | 1055 | AACAUUCA  | 1047 | 3 UTR | 0.0102 | 1 |
| <u>CAMSAP1</u>   | <u>NM_015447</u>    | 8 | 1054 | ACAUUCA   | 1047 | 3 UTR | 0.0402 | 2 |
| <u>CAMSAP1L1</u> | <u>NM_203459</u>    | 8 | 3592 | ACAUUCA   | 3585 | 3 UTR | 0.0400 | 2 |
| <u>CAMTA2</u>    | <u>NM_015099</u>    | 8 | 878  | ACAUUCA   | 871  | 3 UTR | 0.0090 | 2 |
| <u>CAND1</u>     | <u>NM_018448</u>    | 8 | 1782 | ACAUUCA   | 1775 | 3 UTR | 0.0280 | 2 |
| <u>CAPRIN1</u>   | <u>NM_005898</u>    | 7 | 1047 | AACAUUC   | 1041 | 3 UTR | 0.0308 | 1 |
| <u>CAPRIN2</u>   | <u>NM_001002259</u> | 7 | 643  | AACAUUC   | 637  | 3 UTR | 0.0205 | 1 |
| <u>CAPZA2</u>    | <u>NM_006136</u>    | 7 | 2059 | AACAUUC   | 2053 | 3 UTR | 0.0260 | 1 |
| <u>CARD11</u>    | <u>NM_032415</u>    | 8 | 2036 | AACAUUCA  | 2029 | 3 UTR | 0.0141 | 1 |
| <u>CARD14</u>    | <u>NM_024110</u>    | 7 | 2447 | AACAUUC   | 2441 | 3 UTR | 0.0293 | 1 |
| <u>CARM1</u>     | <u>NM_199141</u>    | 8 | 1433 | AACAUUCA  | 1426 | 3 UTR | 0.0281 | 1 |
| <u>CASP1</u>     | <u>NM_033292</u>    | 9 | 2242 | AACAUUCA  | 2234 | 3 UTR | 0.0158 | 1 |
| <u>CBLB</u>      | <u>NM_170662</u>    | 8 | 559  | AACAUUCA  | 552  | 3 UTR | 0.0049 | 1 |
| <u>CBLL1</u>     | <u>NM_024814</u>    | 7 | 558  | ACAUUCA   | 552  | 3 UTR | 0.0194 | 2 |
| <u>CBX4</u>      | <u>NM_003655</u>    | 8 | 2417 | AACAUUCA  | 2410 | 3 UTR | 0.0269 | 1 |
| <u>CBX7</u>      | <u>NM_175709</u>    | 9 | 2673 | ACAUUCAAC | 2665 | 3 UTR | 0.0068 | 2 |
| <u>CC2D2B</u>    | <u>NM_001001732</u> | 8 | 1768 | AACAUUCA  | 1761 | 3 UTR | 0.0119 | 1 |
| <u>CCAR1</u>     | <u>NM_018237</u>    | 7 | 1767 | ACAUUCA   | 1761 | 3 UTR | 0.0467 | 2 |
| <u>CCBL1</u>     | <u>NM_001122671</u> | 8 | 2223 | ACAUUCA   | 2216 | 3 UTR | 0.0380 | 2 |
| <u>CCDC100</u>   | <u>NM_153223</u>    | 8 | 1252 | ACAUUCA   | 1245 | 3 UTR | 0.0386 | 2 |
| <u>CCDC102A</u>  | <u>NM_033212</u>    | 9 | 4917 | AACAUUCA  | 4909 | 3 UTR | 0.0136 | 1 |
| <u>CCDC112</u>   | <u>NM_152549</u>    | 8 | 1040 | AACAUUCA  | 1033 | 3 UTR | 0.0245 | 1 |
| <u>CCDC125</u>   | <u>NM_176816</u>    | 8 | 2021 | AACAUUCA  | 2014 | 3 UTR | 0.0204 | 1 |
| <u>CCDC126</u>   | <u>NM_138771</u>    | 8 | 5123 | AACAUUCA  | 5116 | 3 UTR | 0.0341 | 1 |
| <u>CCDC17</u>    | <u>NM_001114938</u> | 7 | 714  | AACAUUC   | 708  | 3 UTR | 0.0298 | 1 |
| <u>CCDC36</u>    | <u>NM_178173</u>    | 8 | 1097 | ACAUUCA   | 1090 | 3 UTR | 0.0214 | 2 |
| <u>CCDC41</u>    | <u>NM_016122</u>    | 7 | 1293 | AACAUUC   | 1287 | 3 UTR | 0.0486 | 1 |
| <u>CCDC42</u>    | <u>NM_144681</u>    | 7 | 765  | ACAUUCA   | 759  | 3 UTR | 0.0486 | 2 |
| <u>CCDC51</u>    | <u>NM_024661</u>    | 8 | 3998 | AACAUUCA  | 3991 | 3 UTR | 0.0461 | 1 |
| <u>CCDC60</u>    | <u>NM_178499</u>    | 8 | 2982 | AACAUUCA  | 2975 | 3 UTR | 0.0270 | 1 |
| <u>CCDC75</u>    | <u>NM_174931</u>    | 8 | 2440 | ACAUUCA   | 2433 | 3 UTR | 0.0184 | 2 |
| <u>CCDC88C</u>   | <u>NM_001080414</u> | 9 | 1550 | ACAUUCAAC | 1542 | 3 UTR | 0.0077 | 2 |
| <u>CCDC92</u>    | <u>NM_025140</u>    | 8 | 4090 | ACAUUCA   | 4083 | 3 UTR | 0.0456 | 2 |
| <u>CCL13</u>     | <u>NM_005408</u>    | 7 | 924  | ACAUUCA   | 918  | 3 UTR | 0.0296 | 2 |
| <u>CCL22</u>     | <u>NM_002990</u>    | 8 | 1193 | ACAUUCA   | 1186 | 3 UTR | 0.0092 | 2 |

|                   |                     |   |      |           |      |       |        |   |
|-------------------|---------------------|---|------|-----------|------|-------|--------|---|
| <u>CCL8</u>       | <u>NM_005623</u>    | 8 | 1740 | AACAUUCA  | 1733 | 3 UTR | 0.0022 | 1 |
| <u>CCNK</u>       | <u>NM_001099402</u> | 7 | 1739 | ACAUUCA   | 1733 | 3 UTR | 0.0089 | 2 |
| <u>CCNL2</u>      | <u>NM_001039577</u> | 9 | 593  | AACAUUCA  | 585  | 3 UTR | 0.0019 | 1 |
| <u>CCR3</u>       | <u>NM_001837</u>    | 8 | 592  | ACAUUCA   | 585  | 3 UTR | 0.0077 | 2 |
| <u>CCRN4L</u>     | <u>NM_012118</u>    | 7 | 8150 | AACAUUC   | 8144 | 3 UTR | 0.0012 | 1 |
| <u>CCT8L2</u>     | <u>NM_014406</u>    | 7 | 9927 | ACAUUCA   | 9921 | 3 UTR | 0.0012 | 2 |
| <u>CD1E</u>       | <u>NM_030893</u>    | 7 | 8737 | ACAUUCA   | 8731 | 3 UTR | 0.0012 | 2 |
| <u>CD300LB</u>    | <u>NM_174892</u>    | 8 | 3438 | AACAUUCA  | 3431 | 3 UTR | 0.0401 | 1 |
| <u>CD302</u>      | <u>NM_014880</u>    | 7 | 811  | ACAUUCA   | 805  | 3 UTR | 0.0198 | 2 |
| <u>CD46</u>       | <u>NM_002389</u>    | 8 | 2373 | AACAUUCA  | 2366 | 3 UTR | 0.0375 | 1 |
| <u>CD48</u>       | <u>NM_001778</u>    | 9 | 1968 | ACAUUCAAC | 1960 | 3 UTR | 0.0095 | 2 |
| <u>CDC14A</u>     | <u>NM_003672</u>    | 8 | 3012 | ACAUUCA   | 3005 | 3 UTR | 0.0407 | 2 |
| <u>CDC2</u>       | <u>NM_001130829</u> | 8 | 2689 | AACAUUCA  | 2682 | 3 UTR | 0.0124 | 1 |
| <u>CDC40</u>      | <u>NM_015891</u>    | 8 | 2418 | AACAUUCA  | 2411 | 3 UTR | 0.0124 | 1 |
| <u>CDH13</u>      | <u>NM_001257</u>    | 7 | 2688 | ACAUUCA   | 2682 | 3 UTR | 0.0486 | 2 |
| <u>CDH23</u>      | <u>NM_022124</u>    | 7 | 2417 | ACAUUCA   | 2411 | 3 UTR | 0.0486 | 2 |
| <u>CDK8</u>       | <u>NM_001260</u>    | 8 | 5265 | ACAUUCA   | 5258 | 3 UTR | 0.0256 | 2 |
| <u>CDKN1B</u>     | <u>NM_004064</u>    | 8 | 3254 | AACAUUCA  | 3247 | 3 UTR | 0.0306 | 1 |
| <u>CDKN2AIP</u>   | <u>NM_017632</u>    | 9 | 1939 | AACAUUCA  | 1931 | 3 UTR | 0.0059 | 1 |
| <u>CDKN2AIPNL</u> | <u>NM_080656</u>    | 8 | 2305 | ACAUUCA   | 2298 | 3 UTR | 0.0236 | 2 |
| <u>CDKN3</u>      | <u>NM_005192</u>    | 8 | 1938 | ACAUUCA   | 1931 | 3 UTR | 0.0236 | 2 |
| <u>CDS1</u>       | <u>NM_001263</u>    | 9 | 2327 | ACAUUCAAC | 2319 | 3 UTR | 0.0071 | 2 |
| <u>CDYL</u>       | <u>NM_170751</u>    | 8 | 1605 | ACAUUCA   | 1598 | 3 UTR | 0.0281 | 2 |
| <u>CEBPG</u>      | <u>NM_001806</u>    | 8 | 2041 | ACAUUCA   | 2034 | 3 UTR | 0.0458 | 2 |
| <u>CENPI</u>      | <u>NM_006733</u>    | 8 | 3733 | AACAUUCA  | 3726 | 3 UTR | 0.0305 | 1 |
| <u>CENTD3</u>     | <u>NM_022481</u>    | 8 | 3455 | ACAUUCA   | 3448 | 3 UTR | 0.0288 | 2 |
| <u>CEP135</u>     | <u>NM_025009</u>    | 8 | 5301 | ACAUUCA   | 5294 | 3 UTR | 0.0424 | 2 |
| <u>CER1</u>       | <u>NM_005454</u>    | 8 | 6738 | ACAUUCA   | 6731 | 3 UTR | 0.0397 | 2 |
| <u>CETN3</u>      | <u>NM_004365</u>    | 7 | 4075 | ACAUUCA   | 4069 | 3 UTR | 0.0452 | 2 |
| <u>CFL1</u>       | <u>NM_005507</u>    | 9 | 5664 | AACAUUCA  | 5656 | 3 UTR | 0.0069 | 1 |
| <u>CFL2</u>       | <u>NM_138638</u>    | 8 | 5663 | ACAUUCA   | 5656 | 3 UTR | 0.0275 | 2 |
| <u>CHCHD7</u>     | <u>NM_001011667</u> | 8 | 5529 | AACAUUCA  | 5522 | 3 UTR | 0.0483 | 1 |
| <u>CHD2</u>       | <u>NM_001271</u>    | 7 | 4370 | ACAUUCA   | 4364 | 3 UTR | 0.0221 | 2 |
| <u>CHD7</u>       | <u>NM_017780</u>    | 8 | 2054 | AACAUUCA  | 2047 | 3 UTR | 0.0213 | 1 |
| <u>CHMP2B</u>     | <u>NM_014043</u>    | 9 | 4194 | ACAUUCAAC | 4186 | 3 UTR | 0.0019 | 2 |
| <u>CHRNA9</u>     | <u>NM_017581</u>    | 7 | 3475 | AACAUUC   | 3469 | 3 UTR | 0.0422 | 1 |
| <u>CHST9</u>      | <u>NM_031422</u>    | 8 | 2577 | ACAUUCA   | 2570 | 3 UTR | 0.0154 | 2 |
| <u>CIDEA</u>      | <u>NM_198289</u>    | 7 | 1254 | ACAUUCA   | 1248 | 3 UTR | 0.0080 | 2 |
| <u>CIT</u>        | <u>NM_007174</u>    | 7 | 3920 | ACAUUCA   | 3914 | 3 UTR | 0.0421 | 2 |
| <u>CLCC1</u>      | <u>NM_001048210</u> | 8 | 4026 | AACAUUCA  | 4019 | 3 UTR | 0.0368 | 1 |
| <u>CLCN6</u>      | <u>NM_001286</u>    | 9 | 3869 | ACAUUCAAC | 3861 | 3 UTR | 0.0093 | 2 |

|                 |                  |    |      |            |      |       |        |   |
|-----------------|------------------|----|------|------------|------|-------|--------|---|
| <u>CLDN18</u>   | <u>NM_016369</u> | 8  | 2620 | ACAUUCA    | 2613 | 3 UTR | 0.0123 | 2 |
| <u>CLEC12A</u>  | <u>NM_138337</u> | 10 | 2879 | AACAUUCAAC | 2870 | 3 UTR | 0.0030 | 1 |
| <u>CLEC3A</u>   | <u>NM_005752</u> | 9  | 2878 | ACAUUCAAC  | 2870 | 3 UTR | 0.0118 | 2 |
| <u>CLIP1</u>    | <u>NM_002956</u> | 7  | 1687 | AACAUUC    | 1681 | 3 UTR | 0.0452 | 1 |
| <u>CLMN</u>     | <u>NM_024734</u> | 7  | 3642 | AACAUUC    | 3636 | 3 UTR | 0.0173 | 1 |
| <u>CMPK2</u>    | <u>NM_207315</u> | 7  | 3717 | ACAUUCA    | 3711 | 3 UTR | 0.0173 | 2 |
| <u>CNGB1</u>    | <u>NM_001297</u> | 7  | 1589 | AACAUUC    | 1583 | 3 UTR | 0.0293 | 1 |
| <u>CNNM2</u>    | <u>NM_017649</u> | 8  | 3446 | ACAUUCA    | 3439 | 3 UTR | 0.0246 | 2 |
| <u>CNOT1</u>    | <u>NM_016284</u> | 7  | 2423 | ACAUUCA    | 2417 | 3 UTR | 0.0357 | 2 |
| <u>CNOT4</u>    | <u>NM_013316</u> | 7  | 1889 | AACAUUC    | 1883 | 3 UTR | 0.0417 | 1 |
| <u>CNOT6L</u>   | <u>NM_144571</u> | 8  | 2589 | AACAUUCA   | 2582 | 3 UTR | 0.0307 | 1 |
| <u>CNTN1</u>    | <u>NM_001843</u> | 8  | 1678 | AACAUUCA   | 1671 | 3 UTR | 0.0240 | 1 |
| <u>CNTN4</u>    | <u>NM_175607</u> | 7  | 1935 | ACAUUCA    | 1929 | 3 UTR | 0.0158 | 2 |
| <u>CNTNAP4</u>  | <u>NM_033401</u> | 7  | 2657 | AACAUUC    | 2651 | 3 UTR | 0.0489 | 1 |
| <u>COASY</u>    | <u>NM_025233</u> | 8  | 2806 | ACAUUCA    | 2799 | 3 UTR | 0.0083 | 2 |
| <u>COL16A1</u>  | <u>NM_001856</u> | 8  | 1351 | AACAUUCA   | 1344 | 3 UTR | 0.0030 | 1 |
| <u>COL19A1</u>  | <u>NM_001858</u> | 7  | 1350 | ACAUUCA    | 1344 | 3 UTR | 0.0119 | 2 |
| <u>COL1A2</u>   | <u>NM_000089</u> | 7  | 1314 | ACAUUCA    | 1308 | 3 UTR | 0.0144 | 2 |
| <u>COL5A1</u>   | <u>NM_000093</u> | 8  | 2447 | AACAUUCA   | 2440 | 3 UTR | 0.0053 | 1 |
| <u>COL6A3</u>   | <u>NM_004369</u> | 7  | 2446 | ACAUUCA    | 2440 | 3 UTR | 0.0210 | 2 |
| <u>COPS2</u>    | <u>NM_004236</u> | 8  | 1078 | AACAUUCA   | 1071 | 3 UTR | 0.0051 | 1 |
| <u>COQ10B</u>   | <u>NM_025147</u> | 7  | 1077 | ACAUUCA    | 1071 | 3 UTR | 0.0201 | 2 |
| <u>COQ2</u>     | <u>NM_015697</u> | 9  | 7390 | AACAUUCA   | 7382 | 3 UTR | 0.0051 | 1 |
| <u>CORO1C</u>   | <u>NM_014325</u> | 8  | 7389 | ACAUUCA    | 7382 | 3 UTR | 0.0202 | 2 |
| <u>COX11</u>    | <u>NM_004375</u> | 7  | 1721 | ACAUUCA    | 1715 | 3 UTR | 0.0401 | 2 |
| <u>CP110</u>    | <u>NM_014711</u> | 7  | 758  | ACAUUCA    | 752  | 3 UTR | 0.0294 | 2 |
| <u>CPA6</u>     | <u>NM_020361</u> | 8  | 666  | AACAUUCA   | 659  | 3 UTR | 0.0393 | 1 |
| <u>CPD</u>      | <u>NM_001304</u> | 7  | 966  | ACAUUCA    | 960  | 3 UTR | 0.0357 | 2 |
| <u>CPNE2</u>    | <u>NM_152727</u> | 7  | 2525 | ACAUUCA    | 2519 | 3 UTR | 0.0445 | 2 |
| <u>CPNE4</u>    | <u>NM_130808</u> | 9  | 1316 | ACAUUCAAC  | 1308 | 3 UTR | 0.0173 | 2 |
| <u>CPOX</u>     | <u>NM_000097</u> | 8  | 1783 | AACAUUCA   | 1776 | 3 UTR | 0.0068 | 1 |
| <u>CREB1</u>    | <u>NM_134442</u> | 7  | 1782 | ACAUUCA    | 1776 | 3 UTR | 0.0268 | 2 |
| <u>CREBL2</u>   | <u>NM_001310</u> | 7  | 1795 | AACAUUC    | 1789 | 3 UTR | 0.0290 | 1 |
| <u>CREG2</u>    | <u>NM_153836</u> | 8  | 1995 | AACAUUCA   | 1988 | 3 UTR | 0.0020 | 1 |
| <u>CRH</u>      | <u>NM_000756</u> | 7  | 1994 | ACAUUCA    | 1988 | 3 UTR | 0.0080 | 2 |
| <u>CRHBP</u>    | <u>NM_001882</u> | 7  | 2015 | ACAUUCA    | 2009 | 3 UTR | 0.0393 | 2 |
| <u>CRIM1</u>    | <u>NM_016441</u> | 8  | 1663 | ACAUUCA    | 1656 | 3 UTR | 0.0241 | 2 |
| <u>CRISPLD1</u> | <u>NM_031461</u> | 8  | 3705 | AACAUUCA   | 3698 | 3 UTR | 0.0482 | 1 |
| <u>CRY2</u>     | <u>NM_021117</u> | 8  | 1335 | AACAUUCA   | 1328 | 3 UTR | 0.0482 | 1 |
| <u>CSDA</u>     | <u>NM_003651</u> | 8  | 1579 | ACAUUCA    | 1572 | 3 UTR | 0.0306 | 2 |
| <u>CSNK2A2</u>  | <u>NM_001896</u> | 8  | 1022 | AACAUUCA   | 1015 | 3 UTR | 0.0051 | 1 |

|                |                     |    |       |            |       |       |        |   |
|----------------|---------------------|----|-------|------------|-------|-------|--------|---|
| <u>CSRP3</u>   | <u>NM_003476</u>    | 7  | 1021  | ACAUUCA    | 1015  | 3 UTR | 0.0202 | 2 |
| <u>CTAGE1</u>  | <u>NM_172241</u>    | 8  | 3665  | AACAUUCA   | 3658  | 3 UTR | 0.0303 | 1 |
| <u>CTDSPL</u>  | <u>NM_001008392</u> | 8  | 1449  | AACAUUCA   | 1442  | 3 UTR | 0.0135 | 1 |
| <u>CTH</u>     | <u>NM_001902</u>    | 8  | 3164  | ACAUUCA    | 3157  | 3 UTR | 0.0316 | 2 |
| <u>CTNNA1</u>  | <u>NM_001903</u>    | 8  | 2493  | AACAUUCA   | 2486  | 3 UTR | 0.0238 | 1 |
| <u>CTNND1</u>  | <u>NM_001085458</u> | 8  | 11065 | ACAUUCA    | 11058 | 3 UTR | 0.0104 | 2 |
| <u>CUBN</u>    | <u>NM_001081</u>    | 7  | 1740  | ACAUUCA    | 1734  | 3 UTR | 0.0212 | 2 |
| <u>CXCL1</u>   | <u>NM_001511</u>    | 9  | 1821  | AACAUUCA   | 1813  | 3 UTR | 0.0051 | 1 |
| <u>CXCL2</u>   | <u>NM_002089</u>    | 8  | 1820  | ACAUUCA    | 1813  | 3 UTR | 0.0203 | 2 |
| <u>CXorf30</u> | <u>NM_001098843</u> | 9  | 2313  | AACAUUCA   | 2305  | 3 UTR | 0.0019 | 1 |
| <u>CYB5R4</u>  | <u>NM_016230</u>    | 8  | 2312  | ACAUUCA    | 2305  | 3 UTR | 0.0074 | 2 |
| <u>CYP11B1</u> | <u>NM_000497</u>    | 7  | 459   | ACAUUCA    | 453   | 3 UTR | 0.0489 | 2 |
| <u>CYP19A1</u> | <u>NM_031226</u>    | 8  | 851   | ACAUUCA    | 844   | 3 UTR | 0.0023 | 2 |
| <u>CYP26A1</u> | <u>NM_057157</u>    | 8  | 3949  | ACAUUCA    | 3942  | 3 UTR | 0.0398 | 2 |
| <u>CYP26B1</u> | <u>NM_019885</u>    | 8  | 3192  | ACAUUCA    | 3185  | 3 UTR | 0.0227 | 2 |
| <u>CYP2C8</u>  | <u>NM_000770</u>    | 9  | 784   | AACAUUCA   | 776   | 3 UTR | 0.0114 | 1 |
| <u>CYP4F2</u>  | <u>NM_001082</u>    | 8  | 2690  | ACAUUCA    | 2683  | 3 UTR | 0.0449 | 2 |
| <u>CYP7A1</u>  | <u>NM_000780</u>    | 8  | 783   | ACAUUCA    | 776   | 3 UTR | 0.0449 | 2 |
| <u>CYR61</u>   | <u>NM_001554</u>    | 8  | 2550  | AACAUUCA   | 2543  | 3 UTR | 0.0005 | 1 |
| <u>D4S234E</u> | <u>NM_014392</u>    | 7  | 2549  | ACAUUCA    | 2543  | 3 UTR | 0.0018 | 2 |
| <u>DAD1</u>    | <u>NM_001344</u>    | 7  | 4954  | ACAUUCA    | 4948  | 3 UTR | 0.0341 | 2 |
| <u>DAK</u>     | <u>NM_015533</u>    | 8  | 5581  | AACAUUCA   | 5574  | 3 UTR | 0.0305 | 1 |
| <u>DARS</u>    | <u>NM_001349</u>    | 7  | 1067  | AACAUUC    | 1061  | 3 UTR | 0.0216 | 1 |
| <u>DAXX</u>    | <u>NM_001350</u>    | 7  | 659   | AACAUUC    | 653   | 3 UTR | 0.0222 | 1 |
| <u>DCLK3</u>   | <u>NM_033403</u>    | 8  | 872   | ACAUUCA    | 865   | 3 UTR | 0.0056 | 2 |
| <u>DCN</u>     | <u>NM_001920</u>    | 7  | 1139  | AACAUUC    | 1133  | 3 UTR | 0.0315 | 1 |
| <u>DCUN1D1</u> | <u>NM_020640</u>    | 8  | 2357  | ACAUUCA    | 2350  | 3 UTR | 0.0371 | 2 |
| <u>DDHD1</u>   | <u>NM_030637</u>    | 9  | 553   | AACAUUCA   | 545   | 3 UTR | 0.0051 | 1 |
| <u>DDO</u>     | <u>NM_003649</u>    | 8  | 552   | ACAUUCA    | 545   | 3 UTR | 0.0204 | 2 |
| <u>DDX20</u>   | <u>NM_007204</u>    | 8  | 6406  | AACAUUCA   | 6399  | 3 UTR | 0.0493 | 1 |
| <u>DDX3X</u>   | <u>NM_001356</u>    | 9  | 10058 | ACAUUCAAC  | 10050 | 3 UTR | 0.0038 | 2 |
| <u>DDX3Y</u>   | <u>NM_001122665</u> | 8  | 2462  | ACAUUCA    | 2455  | 3 UTR | 0.0262 | 2 |
| <u>DDX43</u>   | <u>NM_018665</u>    | 7  | 1598  | ACAUUCA    | 1592  | 3 UTR | 0.0263 | 2 |
| <u>DDX5</u>    | <u>NM_004396</u>    | 10 | 3110  | AACAUUCAAC | 3101  | 3 UTR | 0.0006 | 1 |
| <u>DDX52</u>   | <u>NM_152300</u>    | 9  | 3109  | ACAUUCAAC  | 3101  | 3 UTR | 0.0023 | 2 |
| <u>DDX55</u>   | <u>NM_020936</u>    | 7  | 1015  | AACAUUC    | 1009  | 3 UTR | 0.0226 | 1 |
| <u>DDX60</u>   | <u>NM_017631</u>    | 9  | 8015  | AACAUUCA   | 8007  | 3 UTR | 0.0093 | 1 |
| <u>DDX60L</u>  | <u>NM_001012967</u> | 8  | 8014  | ACAUUCA    | 8007  | 3 UTR | 0.0365 | 2 |
| <u>Dec-01</u>  | <u>NM_017418</u>    | 10 | 2426  | AACAUUCAAC | 2417  | 3 UTR | 0.0029 | 1 |
| <u>DENND1A</u> | <u>NM_020946</u>    | 9  | 2425  | ACAUUCAAC  | 2417  | 3 UTR | 0.0115 | 2 |
| <u>DENND4C</u> | <u>NM_017925</u>    | 8  | 4736  | AACAUUCA   | 4729  | 3 UTR | 0.0436 | 1 |

|                 |                     |    |       |          |       |       |        |   |
|-----------------|---------------------|----|-------|----------|-------|-------|--------|---|
| <u>DEPDC5</u>   | <u>NM_014662</u>    | 8  | 3320  | AACAUUCA | 3313  | 3 UTR | 0.0376 | 1 |
| <u>DEPDC6</u>   | <u>NM_022783</u>    | 8  | 1157  | AACAUUCA | 1150  | 3 UTR | 0.0096 | 1 |
| <u>DGCR2</u>    | <u>NM_005137</u>    | 7  | 1156  | ACAUUCA  | 1150  | 3 UTR | 0.0379 | 2 |
| <u>DGKE</u>     | <u>NM_003647</u>    | 8  | 1830  | ACAUUCA  | 1823  | 3 UTR | 0.0195 | 2 |
| <u>DGKH</u>     | <u>NM_178009</u>    | 8  | 5613  | ACAUUCA  | 5606  | 3 UTR | 0.0220 | 2 |
| <u>DHRS9</u>    | <u>NM_005771</u>    | 9  | 12375 | AACAUUCA | 12367 | 3 UTR | 0.0361 | 1 |
| <u>DHX29</u>    | <u>NM_019030</u>    | 8  | 2464  | ACAUUCA  | 2457  | 3 UTR | 0.0234 | 2 |
| <u>DHX33</u>    | <u>NM_020162</u>    | 8  | 4209  | ACAUUCA  | 4202  | 3 UTR | 0.0277 | 2 |
| <u>DHX57</u>    | <u>NM_198963</u>    | 8  | 3504  | AACAUUCA | 3497  | 3 UTR | 0.0199 | 1 |
| <u>DIP2C</u>    | <u>NM_014974</u>    | 9  | 8317  | AACAUUCA | 8309  | 3 UTR | 0.0039 | 1 |
| <u>DIRAS3</u>   | <u>NM_004675</u>    | 8  | 8316  | ACAUUCA  | 8309  | 3 UTR | 0.0155 | 2 |
| <u>DKC1</u>     | <u>NM_001363</u>    | 10 | 2459  | AACAUUCA | 2450  | 3 UTR | 0.0011 | 1 |
| <u>DMGDH</u>    | <u>NM_013391</u>    | 9  | 2458  | ACAUUCA  | 2450  | 3 UTR | 0.0042 | 2 |
| <u>DMRT3</u>    | <u>NM_021240</u>    | 10 | 7660  | AACAUUCA | 7651  | 3 UTR | 0.0067 | 1 |
| <u>DMXL2</u>    | <u>NM_015263</u>    | 9  | 7659  | ACAUUCA  | 7651  | 3 UTR | 0.0265 | 2 |
| <u>DNAH8</u>    | <u>NM_001371</u>    | 7  | 3174  | ACAUUCA  | 3168  | 3 UTR | 0.0156 | 2 |
| <u>DNAJB1</u>   | <u>NM_006145</u>    | 8  | 4221  | ACAUUCA  | 4214  | 3 UTR | 0.0262 | 2 |
| <u>DNAJC13</u>  | <u>NM_015268</u>    | 7  | 4403  | ACAUUCA  | 4397  | 3 UTR | 0.0333 | 2 |
| <u>DNAJC3</u>   | <u>NM_006260</u>    | 8  | 2547  | AACAUUCA | 2540  | 3 UTR | 0.0047 | 1 |
| <u>DNAJC7</u>   | <u>NM_003315</u>    | 7  | 2546  | ACAUUCA  | 2540  | 3 UTR | 0.0187 | 2 |
| <u>DNHD1</u>    | <u>NM_144666</u>    | 8  | 5265  | AACAUUCA | 5258  | 3 UTR | 0.0061 | 1 |
| <u>DOCK10</u>   | <u>NM_014689</u>    | 7  | 5264  | ACAUUCA  | 5258  | 3 UTR | 0.0244 | 2 |
| <u>DOCK4</u>    | <u>NM_014705</u>    | 10 | 4030  | AACAUUCA | 4021  | 3 UTR | 0.0049 | 1 |
| <u>DOCK7</u>    | <u>NM_033407</u>    | 9  | 4029  | ACAUUCA  | 4021  | 3 UTR | 0.0196 | 2 |
| <u>DOK6</u>     | <u>NM_152721</u>    | 7  | 5089  | AACAUUC  | 5083  | 3 UTR | 0.0499 | 1 |
| <u>DOPEY1</u>   | <u>NM_015018</u>    | 8  | 7309  | AACAUUCA | 7302  | 3 UTR | 0.0380 | 1 |
| <u>DOPEY2</u>   | <u>NM_005128</u>    | 9  | 10052 | AACAUUCA | 10044 | 3 UTR | 0.0030 | 1 |
| <u>DPH3</u>     | <u>NM_001047434</u> | 8  | 10051 | ACAUUCA  | 10044 | 3 UTR | 0.0118 | 2 |
| <u>DPP10</u>    | <u>NM_020868</u>    | 8  | 2349  | AACAUUCA | 2342  | 3 UTR | 0.0092 | 1 |
| <u>DPY19L1</u>  | <u>NM_015283</u>    | 7  | 2304  | AACAUUC  | 2298  | 3 UTR | 0.0362 | 1 |
| <u>DPY19L2</u>  | <u>NM_173812</u>    | 8  | 2726  | ACAUUCA  | 2719  | 3 UTR | 0.0092 | 2 |
| <u>DR1</u>      | <u>NM_001938</u>    | 7  | 2348  | ACAUUCA  | 2342  | 3 UTR | 0.0362 | 2 |
| <u>DSE</u>      | <u>NM_013352</u>    | 9  | 1827  | ACAUUCA  | 1819  | 3 UTR | 0.0046 | 2 |
| <u>DYNC1L12</u> | <u>NM_006141</u>    | 7  | 1483  | ACAUUCA  | 1477  | 3 UTR | 0.0236 | 2 |
| <u>DYNC2H1</u>  | <u>NM_001080463</u> | 8  | 3313  | AACAUUCA | 3306  | 3 UTR | 0.0346 | 1 |
| <u>DYNLRB1</u>  | <u>NM_014183</u>    | 8  | 1568  | AACAUUCA | 1561  | 3 UTR | 0.0277 | 1 |
| <u>DYRK2</u>    | <u>NM_006482</u>    | 8  | 4080  | ACAUUCA  | 4073  | 3 UTR | 0.0323 | 2 |
| <u>E2F5</u>     | <u>NM_001951</u>    | 7  | 1825  | AACAUUC  | 1819  | 3 UTR | 0.0204 | 1 |
| <u>EDG1</u>     | <u>NM_001400</u>    | 9  | 5552  | AACAUUCA | 5544  | 3 UTR | 0.0146 | 1 |
| <u>EDNRA</u>    | <u>NM_001957</u>    | 8  | 2129  | ACAUUCA  | 2122  | 3 UTR | 0.0047 | 2 |
| <u>EDNRB</u>    | <u>NM_001122659</u> | 8  | 2478  | AACAUUCA | 2471  | 3 UTR | 0.0073 | 1 |

|                |                     |    |       |             |       |       |        |   |
|----------------|---------------------|----|-------|-------------|-------|-------|--------|---|
| <u>EED</u>     | <u>NM_152991</u>    | 7  | 2477  | ACAUUCA     | 2471  | 3 UTR | 0.0288 | 2 |
| <u>EEF1E1</u>  | <u>NM_004280</u>    | 11 | 2596  | AACAUUCAACG | 2586  | 3 UTR | 0.0003 | 1 |
| <u>EFHA2</u>   | <u>NM_181723</u>    | 10 | 2595  | ACAUUCAACG  | 2586  | 3 UTR | 0.0012 | 2 |
| <u>EFS</u>     | <u>NM_005864</u>    | 8  | 2184  | ACAUUCA     | 2177  | 3 UTR | 0.0190 | 2 |
| <u>EGFL6</u>   | <u>NM_015507</u>    | 8  | 9255  | AACAUUCA    | 9248  | 3 UTR | 0.0271 | 1 |
| <u>EGLN1</u>   | <u>NM_022051</u>    | 8  | 1452  | AACAUUCA    | 1445  | 3 UTR | 0.0271 | 1 |
| <u>EHF</u>     | <u>NM_012153</u>    | 8  | 1531  | AACAUUCA    | 1524  | 3 UTR | 0.0463 | 1 |
| <u>EIF1</u>    | <u>NM_005801</u>    | 8  | 2866  | AACAUUCA    | 2859  | 3 UTR | 0.0384 | 1 |
| <u>EIF2AK1</u> | <u>NM_014413</u>    | 7  | 1245  | AACAUUC     | 1239  | 3 UTR | 0.0302 | 1 |
| <u>EIF2AK4</u> | <u>NM_001013703</u> | 7  | 1828  | AACAUUC     | 1822  | 3 UTR | 0.0363 | 1 |
| <u>EIF2S3</u>  | <u>NM_001415</u>    | 9  | 4345  | ACAUUCAAC   | 4337  | 3 UTR | 0.0093 | 2 |
| <u>EIF4A2</u>  | <u>NM_001967</u>    | 8  | 2227  | ACAUUCA     | 2220  | 3 UTR | 0.0347 | 2 |
| <u>ELAVL2</u>  | <u>NM_004432</u>    | 8  | 2066  | AACAUUCA    | 2059  | 3 UTR | 0.0350 | 1 |
| <u>ELAVL4</u>  | <u>NM_021952</u>    | 7  | 1971  | AACAUUC     | 1965  | 3 UTR | 0.0370 | 1 |
| <u>EN1</u>     | <u>NM_001426</u>    | 7  | 1521  | AACAUUC     | 1515  | 3 UTR | 0.0370 | 1 |
| <u>EN2</u>     | <u>NM_001427</u>    | 7  | 1474  | AACAUUC     | 1468  | 3 UTR | 0.0288 | 1 |
| <u>ENDOD1</u>  | <u>NM_015036</u>    | 8  | 852   | AACAUUCA    | 845   | 3 UTR | 0.0097 | 1 |
| <u>ENOX2</u>   | <u>NM_182314</u>    | 7  | 851   | ACAUUCA     | 845   | 3 UTR | 0.0383 | 2 |
| <u>EPC2</u>    | <u>NM_015630</u>    | 8  | 3527  | ACAUUCA     | 3520  | 3 UTR | 0.0297 | 2 |
| <u>EPDR1</u>   | <u>NM_017549</u>    | 9  | 2832  | AACAUUCA    | 2824  | 3 UTR | 0.0136 | 1 |
| <u>EPHA4</u>   | <u>NM_004438</u>    | 9  | 1266  | AACAUUCA    | 1258  | 3 UTR | 0.0136 | 1 |
| <u>EPS8</u>    | <u>NM_004447</u>    | 7  | 1739  | AACAUUC     | 1733  | 3 UTR | 0.0275 | 1 |
| <u>ERAP2</u>   | <u>NM_022350</u>    | 9  | 3711  | AACAUUCA    | 3703  | 3 UTR | 0.0037 | 1 |
| <u>ERC2</u>    | <u>NM_015576</u>    | 8  | 3710  | ACAUUCA     | 3703  | 3 UTR | 0.0146 | 2 |
| <u>ERLIN2</u>  | <u>NM_007175</u>    | 8  | 5835  | ACAUUCA     | 5828  | 3 UTR | 0.0431 | 2 |
| <u>ERMAP</u>   | <u>NM_001017922</u> | 8  | 11896 | AACAUUCA    | 11889 | 3 UTR | 0.0153 | 1 |
| <u>ESCO2</u>   | <u>NM_001017420</u> | 7  | 722   | AACAUUC     | 716   | 3 UTR | 0.0418 | 1 |
| <u>ESM1</u>    | <u>NM_007036</u>    | 7  | 883   | ACAUUCA     | 877   | 3 UTR | 0.0418 | 2 |
| <u>ETF1</u>    | <u>NM_004730</u>    | 7  | 969   | ACAUUCA     | 963   | 3 UTR | 0.0447 | 2 |
| <u>EVI5</u>    | <u>NM_005665</u>    | 8  | 2729  | AACAUUCA    | 2722  | 3 UTR | 0.0049 | 1 |
| <u>EXDL1</u>   | <u>NM_152596</u>    | 7  | 2160  | AACAUUC     | 2154  | 3 UTR | 0.0337 | 1 |
| <u>EXOC2</u>   | <u>NM_018303</u>    | 8  | 3503  | ACAUUCA     | 3496  | 3 UTR | 0.0305 | 2 |
| <u>EXOC8</u>   | <u>NM_175876</u>    | 8  | 4088  | ACAUUCA     | 4081  | 3 UTR | 0.0414 | 2 |
| <u>EXOSC2</u>  | <u>NM_014285</u>    | 9  | 1679  | AACAUUCA    | 1671  | 3 UTR | 0.0022 | 1 |
| <u>EXOSC3</u>  | <u>NM_016042</u>    | 8  | 1678  | ACAUUCA     | 1671  | 3 UTR | 0.0088 | 2 |
| <u>FAM100B</u> | <u>NM_182565</u>    | 8  | 4455  | AACAUUCA    | 4448  | 3 UTR | 0.0447 | 1 |
| <u>FAM102A</u> | <u>NM_001035254</u> | 7  | 1891  | ACAUUCA     | 1885  | 3 UTR | 0.0215 | 2 |
| <u>FAM104B</u> | <u>NM_138362</u>    | 8  | 1782  | AACAUUCA    | 1775  | 3 UTR | 0.0113 | 1 |
| <u>FAM105A</u> | <u>NM_019018</u>    | 7  | 1781  | ACAUUCA     | 1775  | 3 UTR | 0.0446 | 2 |
| <u>FAM107B</u> | <u>NM_031453</u>    | 8  | 1835  | AACAUUCA    | 1828  | 3 UTR | 0.0196 | 1 |
| <u>FAM118B</u> | <u>NM_024556</u>    | 8  | 1896  | AACAUUCA    | 1889  | 3 UTR | 0.0140 | 1 |

|                 |                     |    |       |            |       |       |        |   |
|-----------------|---------------------|----|-------|------------|-------|-------|--------|---|
| <u>FAM119B</u>  | <u>NM_206914</u>    | 8  | 2690  | ACAUUCA    | 2683  | 3 UTR | 0.0244 | 2 |
| <u>FAM135A</u>  | <u>NM_001105531</u> | 7  | 469   | AACAUUC    | 463   | 3 UTR | 0.0175 | 1 |
| <u>FAM135B</u>  | <u>NM_015912</u>    | 8  | 3982  | AACAUUCA   | 3975  | 3 UTR | 0.0339 | 1 |
| <u>FAM13A1</u>  | <u>NM_014883</u>    | 7  | 2163  | ACAUUCA    | 2157  | 3 UTR | 0.0378 | 2 |
| <u>FAM24A</u>   | <u>NM_001029888</u> | 7  | 2459  | AACAUUC    | 2453  | 3 UTR | 0.0084 | 1 |
| <u>FAM26D</u>   | <u>NM_153036</u>    | 8  | 5235  | ACAUUCA    | 5228  | 3 UTR | 0.0434 | 2 |
| <u>FAM3B</u>    | <u>NM_058186</u>    | 9  | 2190  | ACAUUCAAC  | 2182  | 3 UTR | 0.0031 | 2 |
| <u>FAM43A</u>   | <u>NM_153690</u>    | 8  | 1939  | ACAUUCA    | 1932  | 3 UTR | 0.0124 | 2 |
| <u>FAM47B</u>   | <u>NM_152631</u>    | 9  | 1702  | AACAUUCA   | 1694  | 3 UTR | 0.0090 | 1 |
| <u>FAM54B</u>   | <u>NM_019557</u>    | 8  | 1701  | ACAUUCA    | 1694  | 3 UTR | 0.0354 | 2 |
| <u>FAM58A</u>   | <u>NM_152274</u>    | 7  | 11080 | AACAUUC    | 11074 | 3 UTR | 0.0453 | 1 |
| <u>FAM70A</u>   | <u>NM_017938</u>    | 8  | 1543  | AACAUUCA   | 1536  | 3 UTR | 0.0094 | 1 |
| <u>FAM71C</u>   | <u>NM_153364</u>    | 7  | 1542  | ACAUUCA    | 1536  | 3 UTR | 0.0371 | 2 |
| <u>FAM71D</u>   | <u>NM_173526</u>    | 8  | 3385  | ACAUUCA    | 3378  | 3 UTR | 0.0103 | 2 |
| <u>FAM84A</u>   | <u>NM_145175</u>    | 9  | 4748  | AACAUUCA   | 4740  | 3 UTR | 0.0098 | 1 |
| <u>FANCM</u>    | <u>NM_020937</u>    | 9  | 4754  | ACAUUCAAC  | 4746  | 3 UTR | 0.0098 | 2 |
| <u>FASTKD1</u>  | <u>NM_024622</u>    | 8  | 4747  | ACAUUCA    | 4740  | 3 UTR | 0.0387 | 2 |
| <u>FBN2</u>     | <u>NM_001999</u>    | 9  | 4127  | AACAUUCA   | 4119  | 3 UTR | 0.0089 | 1 |
| <u>FBXL3</u>    | <u>NM_012158</u>    | 9  | 4133  | ACAUUCAAC  | 4125  | 3 UTR | 0.0089 | 2 |
| <u>FBXO21</u>   | <u>NM_033624</u>    | 8  | 4126  | ACAUUCA    | 4119  | 3 UTR | 0.0353 | 2 |
| <u>FBXO24</u>   | <u>NM_033506</u>    | 7  | 2525  | AACAUUC    | 2519  | 3 UTR | 0.0128 | 1 |
| <u>FBXO5</u>    | <u>NM_012177</u>    | 8  | 3286  | AACAUUCA   | 3279  | 3 UTR | 0.0047 | 1 |
| <u>FBXW2</u>    | <u>NM_012164</u>    | 7  | 3285  | ACAUUCA    | 3279  | 3 UTR | 0.0187 | 2 |
| <u>FCAMR</u>    | <u>NM_001122980</u> | 7  | 3022  | ACAUUCA    | 3016  | 3 UTR | 0.0187 | 2 |
| <u>FDFT1</u>    | <u>NM_004462</u>    | 9  | 3091  | AACAUUCA   | 3083  | 3 UTR | 0.0073 | 1 |
| <u>FGF7</u>     | <u>NM_002009</u>    | 8  | 2012  | AACAUUCA   | 2005  | 3 UTR | 0.0290 | 1 |
| <u>FHAD1</u>    | <u>NM_052929</u>    | 8  | 3090  | ACAUUCA    | 3083  | 3 UTR | 0.0290 | 2 |
| <u>FIBCD1</u>   | <u>NM_032843</u>    | 7  | 2435  | ACAUUCA    | 2429  | 3 UTR | 0.0483 | 2 |
| <u>FIGN</u>     | <u>NM_018086</u>    | 7  | 5727  | AACAUUC    | 5721  | 3 UTR | 0.0391 | 1 |
| <u>FKBP1A</u>   | <u>NM_000801</u>    | 8  | 6647  | ACAUUCA    | 6640  | 3 UTR | 0.0213 | 2 |
| <u>FKTN</u>     | <u>NM_001079802</u> | 8  | 736   | ACAUUCA    | 729   | 3 UTR | 0.0079 | 2 |
| <u>FLJ10213</u> | <u>NM_018029</u>    | 9  | 4382  | AACAUUCA   | 4374  | 3 UTR | 0.0068 | 1 |
| <u>FLJ11151</u> | <u>NM_018340</u>    | 8  | 4381  | ACAUUCA    | 4374  | 3 UTR | 0.0268 | 2 |
| <u>FLJ11184</u> | <u>NM_018352</u>    | 8  | 5241  | ACAUUCA    | 5234  | 3 UTR | 0.0296 | 2 |
| <u>FLJ13137</u> | <u>NM_001085375</u> | 7  | 5185  | ACAUUCA    | 5179  | 3 UTR | 0.0320 | 2 |
| <u>FLJ31818</u> | <u>NM_152556</u>    | 10 | 2180  | AACAUUCAAC | 2171  | 3 UTR | 0.0012 | 1 |
| <u>FLJ32549</u> | <u>NM_152440</u>    | 9  | 2179  | ACAUUCAAC  | 2171  | 3 UTR | 0.0046 | 2 |
| <u>FLJ42957</u> | <u>NM_207436</u>    | 10 | 3129  | ACAUUCAACG | 3120  | 3 UTR | 0.0025 | 2 |
| <u>FMNL2</u>    | <u>NM_052905</u>    | 7  | 7200  | AACAUUC    | 7194  | 3 UTR | 0.0460 | 1 |
| <u>FNDC3A</u>   | <u>NM_001079673</u> | 7  | 4028  | AACAUUC    | 4022  | 3 UTR | 0.0338 | 1 |
| <u>FNDC3B</u>   | <u>NM_022763</u>    | 8  | 4156  | ACAUUCA    | 4149  | 3 UTR | 0.0086 | 2 |



|                |                     |    |       |           |       |       |        |   |
|----------------|---------------------|----|-------|-----------|-------|-------|--------|---|
| <u>FOS</u>     | <u>NM_005252</u>    | 8  | 2820  | ACAUUCA   | 2813  | 3 UTR | 0.0064 | 1 |
| <u>FPRL1</u>   | <u>NM_001462</u>    | 7  | 2819  | ACAUUCA   | 2813  | 3 UTR | 0.0252 | 2 |
| <u>FPRL2</u>   | <u>NM_002030</u>    | 7  | 4432  | ACAUUCA   | 4426  | 3 UTR | 0.0158 | 2 |
| <u>FRAT2</u>   | <u>NM_012083</u>    | 8  | 2540  | ACAUUCA   | 2533  | 3 UTR | 0.0293 | 1 |
| <u>FRMD7</u>   | <u>NM_194277</u>    | 7  | 4563  | ACAUUCA   | 4557  | 3 UTR | 0.0351 | 2 |
| <u>FRMD8</u>   | <u>NM_031904</u>    | 10 | 7427  | ACAUUCAAC | 7418  | 3 UTR | 0.0030 | 1 |
| <u>FUT1</u>    | <u>NM_000148</u>    | 9  | 7426  | ACAUUCAAC | 7418  | 3 UTR | 0.0119 | 2 |
| <u>FUT5</u>    | <u>NM_002034</u>    | 7  | 1246  | ACAUUCA   | 1240  | 3 UTR | 0.0393 | 2 |
| <u>G3BP2</u>   | <u>NM_203505</u>    | 7  | 2432  | ACAUUC    | 2426  | 3 UTR | 0.0493 | 1 |
| <u>GABRA1</u>  | <u>NM_001127644</u> | 8  | 2837  | ACAUUCA   | 2830  | 3 UTR | 0.0076 | 1 |
| <u>GAL3ST1</u> | <u>NM_004861</u>    | 7  | 2836  | ACAUUCA   | 2830  | 3 UTR | 0.0299 | 2 |
| <u>GALK2</u>   | <u>NM_001001556</u> | 8  | 1678  | ACAUUCA   | 1671  | 3 UTR | 0.0110 | 1 |
| <u>GALNT3</u>  | <u>NM_004482</u>    | 7  | 1677  | ACAUUCA   | 1671  | 3 UTR | 0.0434 | 2 |
| <u>GALNTL1</u> | <u>NM_020692</u>    | 8  | 10181 | ACAUUCA   | 10174 | 3 UTR | 0.0188 | 1 |
| <u>GALNTL2</u> | <u>NM_054110</u>    | 8  | 14274 | ACAUUCA   | 14267 | 3 UTR | 0.0061 | 1 |
| <u>GANC</u>    | <u>NM_198141</u>    | 7  | 14273 | ACAUUCA   | 14267 | 3 UTR | 0.0241 | 2 |
| <u>GAPVD1</u>  | <u>NM_015635</u>    | 8  | 1190  | ACAUUCA   | 1183  | 3 UTR | 0.0177 | 1 |
| <u>GATA2</u>   | <u>NM_032638</u>    | 8  | 7474  | ACAUUCA   | 7467  | 3 UTR | 0.0114 | 2 |
| <u>GATM</u>    | <u>NM_001482</u>    | 9  | 5051  | ACAUUCAAC | 5043  | 3 UTR | 0.0000 | 2 |
| <u>GBF1</u>    | <u>NM_004193</u>    | 8  | 1781  | ACAUUCA   | 1774  | 3 UTR | 0.0042 | 2 |
| <u>GBP6</u>    | <u>NM_198460</u>    | 7  | 12534 | ACAUUCA   | 12528 | 3 UTR | 0.0020 | 2 |
| <u>GCN1L1</u>  | <u>NM_006836</u>    | 7  | 11804 | ACAUUCA   | 11798 | 3 UTR | 0.0020 | 2 |
| <u>GCNT2</u>   | <u>NM_001491</u>    | 8  | 7132  | ACAUUCA   | 7125  | 3 UTR | 0.0096 | 1 |
| <u>GCS1</u>    | <u>NM_006302</u>    | 8  | 7807  | ACAUUCA   | 7800  | 3 UTR | 0.0326 | 2 |
| <u>GDI1</u>    | <u>NM_001493</u>    | 8  | 6759  | ACAUUCA   | 6752  | 3 UTR | 0.0106 | 1 |
| <u>GFPT1</u>   | <u>NM_002056</u>    | 7  | 6758  | ACAUUCA   | 6752  | 3 UTR | 0.0418 | 2 |
| <u>GGA2</u>    | <u>NM_015044</u>    | 7  | 6166  | ACAUUC    | 6160  | 3 UTR | 0.0461 | 1 |
| <u>GGPS1</u>   | <u>NM_004837</u>    | 7  | 7818  | ACAUUCA   | 7812  | 3 UTR | 0.0157 | 2 |
| <u>GGT7</u>    | <u>NM_178026</u>    | 7  | 7664  | ACAUUC    | 7658  | 3 UTR | 0.0426 | 1 |
| <u>GHITM</u>   | <u>NM_014394</u>    | 7  | 1095  | ACAUUC    | 1089  | 3 UTR | 0.0185 | 1 |
| <u>GK</u>      | <u>NM_001128127</u> | 8  | 4822  | ACAUUCA   | 4815  | 3 UTR | 0.0303 | 2 |
| <u>GLDN</u>    | <u>NM_181789</u>    | 8  | 2316  | ACAUUCA   | 2309  | 3 UTR | 0.0404 | 2 |
| <u>GLRX</u>    | <u>NM_002064</u>    | 8  | 2638  | ACAUUCA   | 2631  | 3 UTR | 0.0242 | 2 |
| <u>GLS</u>     | <u>NM_014905</u>    | 8  | 2838  | ACAUUCA   | 2831  | 3 UTR | 0.0296 | 1 |
| <u>GLYCK</u>   | <u>NM_145262</u>    | 8  | 3926  | ACAUUCA   | 3919  | 3 UTR | 0.0147 | 1 |
| <u>GNA12</u>   | <u>NM_007353</u>    | 8  | 2943  | ACAUUCA   | 2936  | 3 UTR | 0.0424 | 1 |
| <u>GNA14</u>   | <u>NM_004297</u>    | 8  | 2641  | ACAUUCA   | 2634  | 3 UTR | 0.0424 | 1 |
| <u>GNS</u>     | <u>NM_002076</u>    | 8  | 1991  | ACAUUCA   | 1984  | 3 UTR | 0.0424 | 1 |
| <u>GOLGA7</u>  | <u>NM_001002296</u> | 7  | 13523 | ACAUUCA   | 13517 | 3 UTR | 0.0365 | 2 |
| <u>GOT1</u>    | <u>NM_002079</u>    | 7  | 406   | ACAUUC    | 400   | 3 UTR | 0.0212 | 1 |
| <u>GP5</u>     | <u>NM_004488</u>    | 9  | 5940  | ACAUUCAAC | 5932  | 3 UTR | 0.0150 | 2 |

|                 |                     |    |      |            |      |       |        |   |
|-----------------|---------------------|----|------|------------|------|-------|--------|---|
| <u>GPPB1</u>    | <u>NM_001127235</u> | 7  | 1167 | ACAUUCA    | 1161 | 3 UTR | 0.0398 | 2 |
| <u>GPC5</u>     | <u>NM_004466</u>    | 8  | 2750 | ACAUUCA    | 2743 | 3 UTR | 0.0209 | 2 |
| <u>GPC6</u>     | <u>NM_005708</u>    | 8  | 2688 | ACAUUCA    | 2681 | 3 UTR | 0.0209 | 2 |
| <u>GPLD1</u>    | <u>NM_001503</u>    | 8  | 2339 | AACAUUCA   | 2332 | 3 UTR | 0.0353 | 1 |
| <u>GPR137B</u>  | <u>NM_003272</u>    | 8  | 3285 | ACAUUCA    | 3278 | 3 UTR | 0.0408 | 2 |
| <u>GPR155</u>   | <u>NM_001033045</u> | 7  | 2321 | ACAUUCA    | 2315 | 3 UTR | 0.0449 | 2 |
| <u>GPR174</u>   | <u>NM_032553</u>    | 8  | 750  | AACAUUCA   | 743  | 3 UTR | 0.0077 | 1 |
| <u>GPR180</u>   | <u>NM_180989</u>    | 7  | 749  | ACAUUCA    | 743  | 3 UTR | 0.0303 | 2 |
| <u>GPR22</u>    | <u>NM_005295</u>    | 8  | 3293 | AACAUUCA   | 3286 | 3 UTR | 0.0355 | 1 |
| <u>GPR39</u>    | <u>NM_001508</u>    | 7  | 3052 | ACAUUCA    | 3046 | 3 UTR | 0.0499 | 2 |
| <u>GPR64</u>    | <u>NM_005756</u>    | 8  | 1907 | AACAUUCA   | 1900 | 3 UTR | 0.0075 | 1 |
| <u>GREM1</u>    | <u>NM_013372</u>    | 7  | 1906 | ACAUUCA    | 1900 | 3 UTR | 0.0298 | 2 |
| <u>GRIK2</u>    | <u>NM_175768</u>    | 9  | 6285 | AACAUUCA   | 6277 | 3 UTR | 0.0028 | 1 |
| <u>GRM5</u>     | <u>NM_000842</u>    | 8  | 6284 | ACAUUCA    | 6277 | 3 UTR | 0.0110 | 2 |
| <u>GRM8</u>     | <u>NM_001127323</u> | 9  | 2728 | AACAUUCA   | 2720 | 3 UTR | 0.0099 | 1 |
| <u>GSK3B</u>    | <u>NM_002093</u>    | 8  | 2727 | ACAUUCA    | 2720 | 3 UTR | 0.0389 | 2 |
| <u>GSTCD</u>    | <u>NM_024751</u>    | 7  | 865  | AACAUUC    | 859  | 3 UTR | 0.0488 | 1 |
| <u>GTF2E1</u>   | <u>NM_005513</u>    | 8  | 3941 | ACAUUCA    | 3934 | 3 UTR | 0.0363 | 2 |
| <u>GTF2H1</u>   | <u>NM_005316</u>    | 7  | 5065 | AACAUUC    | 5059 | 3 UTR | 0.0319 | 1 |
| <u>GTF2H5</u>   | <u>NM_207118</u>    | 8  | 3315 | AACAUUCA   | 3308 | 3 UTR | 0.0307 | 1 |
| <u>GTPBP10</u>  | <u>NM_033107</u>    | 9  | 1866 | AACAUUCA   | 1858 | 3 UTR | 0.0024 | 1 |
| <u>GTPBP3</u>   | <u>NM_133644</u>    | 8  | 1865 | ACAUUCA    | 1858 | 3 UTR | 0.0097 | 2 |
| <u>GTSE1</u>    | <u>NM_016426</u>    | 9  | 2693 | AACAUUCA   | 2685 | 3 UTR | 0.0093 | 1 |
| <u>GUCA1B</u>   | <u>NM_002098</u>    | 8  | 2692 | ACAUUCA    | 2685 | 3 UTR | 0.0367 | 2 |
| <u>H2AFJ</u>    | <u>NM_177925</u>    | 9  | 1664 | AACAUUCA   | 1656 | 3 UTR | 0.0009 | 1 |
| <u>H3F3B</u>    | <u>NM_005324</u>    | 8  | 1663 | ACAUUCA    | 1656 | 3 UTR | 0.0034 | 2 |
| <u>HAND2</u>    | <u>NM_021973</u>    | 8  | 2679 | ACAUUCA    | 2672 | 3 UTR | 0.0116 | 2 |
| <u>HAO1</u>     | <u>NM_017545</u>    | 8  | 3282 | AACAUUCA   | 3275 | 3 UTR | 0.0323 | 1 |
| <u>HAPLN1</u>   | <u>NM_001884</u>    | 9  | 4243 | AACAUUCA   | 4235 | 3 UTR | 0.0117 | 1 |
| <u>HBD</u>      | <u>NM_000519</u>    | 8  | 2910 | AACAUUCA   | 2903 | 3 UTR | 0.0458 | 1 |
| <u>HCN2</u>     | <u>NM_001194</u>    | 8  | 4242 | ACAUUCA    | 4235 | 3 UTR | 0.0458 | 2 |
| <u>HEATR3</u>   | <u>NM_182922</u>    | 8  | 3223 | AACAUUCA   | 3216 | 3 UTR | 0.0291 | 1 |
| <u>HEMGN</u>    | <u>NM_018437</u>    | 8  | 3109 | ACAUUCA    | 3102 | 3 UTR | 0.0180 | 2 |
| <u>HEPH</u>     | <u>NM_001130860</u> | 9  | 2297 | ACAUUCAAC  | 2289 | 3 UTR | 0.0059 | 2 |
| <u>HHIP</u>     | <u>NM_022475</u>    | 8  | 4481 | AACAUUCA   | 4474 | 3 UTR | 0.0500 | 1 |
| <u>HIG2</u>     | <u>NM_013332</u>    | 8  | 3717 | AACAUUCA   | 3710 | 3 UTR | 0.0179 | 1 |
| <u>HIGD2A</u>   | <u>NM_138820</u>    | 8  | 4804 | ACAUUCA    | 4797 | 3 UTR | 0.0315 | 2 |
| <u>HINT3</u>    | <u>NM_138571</u>    | 8  | 3453 | ACAUUCA    | 3446 | 3 UTR | 0.0449 | 2 |
| <u>HISPPD1</u>  | <u>NM_015216</u>    | 10 | 3913 | AACAUUCAAC | 3904 | 3 UTR | 0.0035 | 1 |
| <u>HIST1H3D</u> | <u>NM_003530</u>    | 9  | 3912 | ACAUUCAAC  | 3904 | 3 UTR | 0.0140 | 2 |
| <u>HK2</u>      | <u>NM_000189</u>    | 9  | 3282 | AACAUUCA   | 3274 | 3 UTR | 0.0068 | 1 |

|                 |                     |    |      |            |      |       |        |   |
|-----------------|---------------------|----|------|------------|------|-------|--------|---|
| <u>HLA-B</u>    | <u>NM_005514</u>    | 8  | 3281 | ACAUUCA    | 3274 | 3 UTR | 0.0269 | 2 |
| <u>HLA-C</u>    | <u>NM_002117</u>    | 8  | 2143 | AACAUUCA   | 2136 | 3 UTR | 0.0224 | 1 |
| <u>HMGA2</u>    | <u>NM_003483</u>    | 8  | 2014 | ACAUUCA    | 2007 | 3 UTR | 0.0221 | 2 |
| <u>HMGB2</u>    | <u>NM_002129</u>    | 8  | 2448 | AACAUUCA   | 2441 | 3 UTR | 0.0335 | 1 |
| <u>HMGCL</u>    | <u>NM_000191</u>    | 9  | 6205 | AACAUUCA   | 6197 | 3 UTR | 0.0187 | 1 |
| <u>HOOK1</u>    | <u>NM_015888</u>    | 10 | 2312 | AACAUUCAAC | 2303 | 3 UTR | 0.0012 | 1 |
| <u>HOOK3</u>    | <u>NM_032410</u>    | 9  | 2305 | AACAUUCA   | 2297 | 3 UTR | 0.0046 | 1 |
| <u>HOXA11</u>   | <u>NM_005523</u>    | 9  | 2311 | ACAUUCAAC  | 2303 | 3 UTR | 0.0046 | 2 |
| <u>HOXB5</u>    | <u>NM_002147</u>    | 8  | 2304 | ACAUUCA    | 2297 | 3 UTR | 0.0183 | 2 |
| <u>HOXD1</u>    | <u>NM_024501</u>    | 8  | 4369 | AACAUUCA   | 4362 | 3 UTR | 0.0234 | 1 |
| <u>HPS4</u>     | <u>NM_022081</u>    | 8  | 4374 | ACAUUCA    | 4367 | 3 UTR | 0.0423 | 2 |
| <u>HPSE2</u>    | <u>NM_021828</u>    | 8  | 1827 | AACAUUCA   | 1820 | 3 UTR | 0.0195 | 1 |
| <u>HRH1</u>     | <u>NM_001098213</u> | 7  | 952  | ACAUUCA    | 946  | 3 UTR | 0.0222 | 2 |
| <u>HS2ST1</u>   | <u>NM_012262</u>    | 7  | 1376 | ACAUUCA    | 1370 | 3 UTR | 0.0472 | 2 |
| <u>HS3ST2</u>   | <u>NM_006043</u>    | 8  | 2883 | AACAUUCA   | 2876 | 3 UTR | 0.0390 | 1 |
| <u>HS3ST3A1</u> | <u>NM_006042</u>    | 7  | 695  | AACAUUC    | 689  | 3 UTR | 0.0421 | 1 |
| <u>HSD11B1</u>  | <u>NM_181755</u>    | 7  | 5024 | AACAUUC    | 5018 | 3 UTR | 0.0466 | 1 |
| <u>HSD3B1</u>   | <u>NM_000862</u>    | 8  | 4556 | ACAUUCA    | 4549 | 3 UTR | 0.0119 | 2 |
| <u>HSDL2</u>    | <u>NM_032303</u>    | 8  | 2167 | ACAUUCA    | 2160 | 3 UTR | 0.0393 | 2 |
| <u>HSPA1L</u>   | <u>NM_005527</u>    | 7  | 1390 | AACAUUC    | 1384 | 3 UTR | 0.0332 | 1 |
| <u>HSPB3</u>    | <u>NM_006308</u>    | 8  | 2480 | ACAUUCA    | 2473 | 3 UTR | 0.0342 | 2 |
| <u>HSPC159</u>  | <u>NM_014181</u>    | 9  | 5192 | AACAUUCA   | 5184 | 3 UTR | 0.0048 | 1 |
| <u>HTF9C</u>    | <u>NM_022727</u>    | 8  | 5191 | ACAUUCA    | 5184 | 3 UTR | 0.0189 | 2 |
| <u>HYAL4</u>    | <u>NM_012269</u>    | 9  | 6023 | ACAUUCAAC  | 6015 | 3 UTR | 0.0098 | 2 |
| <u>ICT1</u>     | <u>NM_001545</u>    | 8  | 4884 | AACAUUCA   | 4877 | 3 UTR | 0.0386 | 1 |
| <u>ID4</u>      | <u>NM_001546</u>    | 7  | 498  | AACAUUC    | 492  | 3 UTR | 0.0095 | 1 |
| <u>IDH1</u>     | <u>NM_005896</u>    | 8  | 1064 | AACAUUCA   | 1057 | 3 UTR | 0.0100 | 1 |
| <u>IFNG</u>     | <u>NM_000619</u>    | 7  | 1063 | ACAUUCA    | 1057 | 3 UTR | 0.0393 | 2 |
| <u>IFT74</u>    | <u>NM_001099222</u> | 7  | 1358 | ACAUUCA    | 1352 | 3 UTR | 0.0318 | 2 |
| <u>IFT80</u>    | <u>NM_020800</u>    | 8  | 2990 | AACAUUCA   | 2983 | 3 UTR | 0.0148 | 1 |
| <u>IFT81</u>    | <u>NM_014055</u>    | 7  | 2044 | ACAUUCA    | 2038 | 3 UTR | 0.0090 | 2 |
| <u>IL13RA2</u>  | <u>NM_000640</u>    | 8  | 1624 | AACAUUCA   | 1617 | 3 UTR | 0.0141 | 1 |
| <u>IL1A</u>     | <u>NM_000575</u>    | 7  | 1241 | ACAUUCA    | 1235 | 3 UTR | 0.0276 | 2 |
| <u>IL1B</u>     | <u>NM_000576</u>    | 8  | 2822 | AACAUUCA   | 2815 | 3 UTR | 0.0335 | 1 |
| <u>IL1R1</u>    | <u>NM_000877</u>    | 7  | 1507 | ACAUUCA    | 1501 | 3 UTR | 0.0397 | 2 |
| <u>IL1RAP</u>   | <u>NM_002182</u>    | 7  | 1527 | ACAUUCA    | 1521 | 3 UTR | 0.0140 | 2 |
| <u>IL2</u>      | <u>NM_000586</u>    | 8  | 1976 | ACAUUCA    | 1969 | 3 UTR | 0.0221 | 2 |
| <u>IL25</u>     | <u>NM_022789</u>    | 8  | 6756 | AACAUUCA   | 6749 | 3 UTR | 0.0136 | 1 |
| <u>IMP3</u>     | <u>NM_018285</u>    | 8  | 2953 | AACAUUCA   | 2946 | 3 UTR | 0.0013 | 1 |
| <u>IMPG1</u>    | <u>NM_001563</u>    | 7  | 2952 | ACAUUCA    | 2946 | 3 UTR | 0.0054 | 2 |
| <u>INADL</u>    | <u>NM_176877</u>    | 9  | 9318 | AACAUUCA   | 9310 | 3 UTR | 0.0059 | 1 |

|                 |                     |   |      |           |      |       |        |   |
|-----------------|---------------------|---|------|-----------|------|-------|--------|---|
| <u>INCENP</u>   | <u>NM_001040694</u> | 8 | 9317 | ACAUUCA   | 9310 | 3 UTR | 0.0233 | 2 |
| <u>INDOL1</u>   | <u>NM_194294</u>    | 8 | 2157 | AACAUUCA  | 2150 | 3 UTR | 0.0286 | 1 |
| <u>INOC1</u>    | <u>NM_017553</u>    | 8 | 3019 | ACAUUCA   | 3012 | 3 UTR | 0.0348 | 2 |
| <u>INPP4B</u>   | <u>NM_003866</u>    | 7 | 2173 | AACAUUC   | 2167 | 3 UTR | 0.0155 | 1 |
| <u>INPP5E</u>   | <u>NM_019892</u>    | 8 | 1490 | AACAUUCA  | 1483 | 3 UTR | 0.0100 | 1 |
| <u>INVS</u>     | <u>NM_014425</u>    | 7 | 1489 | ACAUUCA   | 1483 | 3 UTR | 0.0393 | 2 |
| <u>IPPK</u>     | <u>NM_022755</u>    | 9 | 2183 | AACAUUCA  | 2175 | 3 UTR | 0.0285 | 1 |
| <u>IQWD1</u>    | <u>NM_018442</u>    | 8 | 2446 | AACAUUCA  | 2439 | 3 UTR | 0.0069 | 1 |
| <u>IRF5</u>     | <u>NM_001098629</u> | 7 | 2445 | ACAUUCA   | 2439 | 3 UTR | 0.0275 | 2 |
| <u>IRS2</u>     | <u>NM_003749</u>    | 9 | 1775 | AACAUUCA  | 1767 | 3 UTR | 0.0027 | 1 |
| <u>ITGA3</u>    | <u>NM_002204</u>    | 8 | 1774 | ACAUUCA   | 1767 | 3 UTR | 0.0108 | 2 |
| <u>ITGB8</u>    | <u>NM_002214</u>    | 8 | 3132 | AACAUUCA  | 3125 | 3 UTR | 0.0422 | 1 |
| <u>ITLN1</u>    | <u>NM_017625</u>    | 7 | 4584 | ACAUUCA   | 4578 | 3 UTR | 0.0426 | 2 |
| <u>ITSN1</u>    | <u>NM_003024</u>    | 8 | 1708 | AACAUUCA  | 1701 | 3 UTR | 0.0236 | 1 |
| <u>ITSN2</u>    | <u>NM_006277</u>    | 8 | 2626 | AACAUUCA  | 2619 | 3 UTR | 0.0292 | 1 |
| <u>IVD</u>      | <u>NM_002225</u>    | 8 | 4384 | ACAUUCA   | 4377 | 3 UTR | 0.0292 | 2 |
| <u>IYD</u>      | <u>NM_203395</u>    | 8 | 3371 | ACAUUCA   | 3364 | 3 UTR | 0.0292 | 2 |
| <u>JARID2</u>   | <u>NM_004973</u>    | 9 | 1399 | AACAUUCA  | 1391 | 3 UTR | 0.0044 | 1 |
| <u>JMJD1A</u>   | <u>NM_018433</u>    | 8 | 1398 | ACAUUCA   | 1391 | 3 UTR | 0.0175 | 2 |
| <u>JOSD3</u>    | <u>NM_024116</u>    | 9 | 2805 | ACAUUCAAC | 2797 | 3 UTR | 0.0221 | 2 |
| <u>JPH4</u>     | <u>NM_032452</u>    | 7 | 1455 | AACAUUC   | 1449 | 3 UTR | 0.0263 | 1 |
| <u>JRK</u>      | <u>NM_003724</u>    | 7 | 1289 | AACAUUC   | 1283 | 3 UTR | 0.0263 | 1 |
| <u>KBTBD6</u>   | <u>NM_152903</u>    | 9 | 3818 | AACAUUCA  | 3810 | 3 UTR | 0.0193 | 1 |
| <u>KBTBD8</u>   | <u>NM_032505</u>    | 8 | 1698 | AACAUUCA  | 1691 | 3 UTR | 0.0156 | 1 |
| <u>KCNA1</u>    | <u>NM_000217</u>    | 8 | 3929 | AACAUUCA  | 3922 | 3 UTR | 0.0470 | 1 |
| <u>KCNA6</u>    | <u>NM_002235</u>    | 8 | 2834 | ACAUUCA   | 2827 | 3 UTR | 0.0392 | 2 |
| <u>KCNB1</u>    | <u>NM_004975</u>    | 9 | 2102 | AACAUUCA  | 2094 | 3 UTR | 0.0047 | 1 |
| <u>KCNE3</u>    | <u>NM_005472</u>    | 8 | 2101 | ACAUUCA   | 2094 | 3 UTR | 0.0185 | 2 |
| <u>KCNG3</u>    | <u>NM_133329</u>    | 8 | 1191 | AACAUUCA  | 1184 | 3 UTR | 0.0070 | 1 |
| <u>KCNH8</u>    | <u>NM_144633</u>    | 7 | 1154 | AACAUUC   | 1148 | 3 UTR | 0.0279 | 1 |
| <u>KCNJ10</u>   | <u>NM_002241</u>    | 7 | 1190 | ACAUUCA   | 1184 | 3 UTR | 0.0279 | 2 |
| <u>KCNJ5</u>    | <u>NM_000890</u>    | 8 | 5104 | AACAUUCA  | 5097 | 3 UTR | 0.0290 | 1 |
| <u>KCNK10</u>   | <u>NM_138317</u>    | 9 | 5728 | ACAUUCAAC | 5720 | 3 UTR | 0.0091 | 2 |
| <u>KCNK5</u>    | <u>NM_003740</u>    | 9 | 6742 | AACAUUCA  | 6734 | 3 UTR | 0.0123 | 1 |
| <u>KCNMB2</u>   | <u>NM_181361</u>    | 8 | 6741 | ACAUUCA   | 6734 | 3 UTR | 0.0482 | 2 |
| <u>KCNN1</u>    | <u>NM_002248</u>    | 8 | 6731 | ACAUUCA   | 6724 | 3 UTR | 0.0482 | 2 |
| <u>KCNQ5</u>    | <u>NM_019842</u>    | 8 | 1897 | AACAUUCA  | 1890 | 3 UTR | 0.0119 | 1 |
| <u>KCTD10</u>   | <u>NM_031954</u>    | 7 | 1896 | ACAUUCA   | 1890 | 3 UTR | 0.0468 | 2 |
| <u>KDEL3</u>    | <u>NM_006855</u>    | 8 | 1743 | AACAUUCA  | 1736 | 3 UTR | 0.0124 | 1 |
| <u>KHDC1</u>    | <u>NM_030568</u>    | 7 | 1742 | ACAUUCA   | 1736 | 3 UTR | 0.0488 | 2 |
| <u>KIAA0090</u> | <u>NM_015047</u>    | 8 | 2485 | AACAUUCA  | 2478 | 3 UTR | 0.0192 | 1 |

|                 |                  |   |      |           |      |       |        |   |
|-----------------|------------------|---|------|-----------|------|-------|--------|---|
| <u>KIAA0182</u> | <u>NM_014615</u> | 8 | 1471 | ACAUUCA   | 1464 | 3 UTR | 0.0210 | 2 |
| <u>KIAA0195</u> | <u>NM_014738</u> | 8 | 3151 | AACAUUCA  | 3144 | 3 UTR | 0.0133 | 1 |
| <u>KIAA0196</u> | <u>NM_014846</u> | 9 | 3705 | AACAUUCA  | 3697 | 3 UTR | 0.0083 | 1 |
| <u>KIAA0241</u> | <u>NM_015060</u> | 8 | 3704 | ACAUUCA   | 3697 | 3 UTR | 0.0328 | 2 |
| <u>KIAA0408</u> | <u>NM_014702</u> | 8 | 3439 | AACAUUCA  | 3432 | 3 UTR | 0.0326 | 1 |
| <u>KIAA0423</u> | <u>NM_015091</u> | 7 | 1581 | ACAUUCA   | 1575 | 3 UTR | 0.0462 | 2 |
| <u>KIAA0528</u> | <u>NM_014802</u> | 8 | 4352 | ACAUUCA   | 4345 | 3 UTR | 0.0398 | 2 |
| <u>KIAA0888</u> | <u>NM_015566</u> | 8 | 4246 | AACAUUCA  | 4239 | 3 UTR | 0.0380 | 1 |
| <u>KIAA0999</u> | <u>NM_025164</u> | 9 | 2794 | ACAUUCAAC | 2786 | 3 UTR | 0.0096 | 2 |
| <u>KIAA1128</u> | <u>NM_018999</u> | 7 | 1726 | AACAUUC   | 1720 | 3 UTR | 0.0191 | 1 |
| <u>KIAA1199</u> | <u>NM_018689</u> | 8 | 2146 | ACAUUCA   | 2139 | 3 UTR | 0.0248 | 2 |
| <u>KIAA1383</u> | <u>NM_019090</u> | 9 | 3093 | AACAUUCA  | 3085 | 3 UTR | 0.0038 | 1 |
| <u>KIF2C</u>    | <u>NM_006845</u> | 8 | 3092 | ACAUUCA   | 3085 | 3 UTR | 0.0150 | 2 |
| <u>KIF5A</u>    | <u>NM_004984</u> | 9 | 2691 | ACAUUCAAC | 2683 | 3 UTR | 0.0044 | 2 |
| <u>KIN</u>      | <u>NM_012311</u> | 9 | 3777 | ACAUUCAAC | 3769 | 3 UTR | 0.0085 | 2 |
| <u>KIR2DL1</u>  | <u>NM_014218</u> | 8 | 4585 | ACAUUCA   | 4578 | 3 UTR | 0.0233 | 2 |
| <u>KL</u>       | <u>NM_004795</u> | 9 | 6573 | AACAUUCA  | 6565 | 3 UTR | 0.0087 | 1 |
| <u>KLF6</u>     | <u>NM_001300</u> | 8 | 6572 | ACAUUCA   | 6565 | 3 UTR | 0.0342 | 2 |
| <u>KLF8</u>     | <u>NM_007250</u> | 8 | 1943 | AACAUUCA  | 1936 | 3 UTR | 0.0242 | 1 |
| <u>KLF9</u>     | <u>NM_001206</u> | 8 | 2222 | AACAUUCA  | 2215 | 3 UTR | 0.0152 | 1 |
| <u>KLHDC5</u>   | <u>NM_020782</u> | 7 | 5967 | AACAUUC   | 5961 | 3 UTR | 0.0334 | 1 |
| <u>KLHL5</u>    | <u>NM_015990</u> | 8 | 2738 | ACAUUCA   | 2731 | 3 UTR | 0.0402 | 2 |
| <u>CLK13</u>    | <u>NM_015596</u> | 7 | 8584 | AACAUUC   | 8578 | 3 UTR | 0.0401 | 1 |
| <u>CLK5</u>     | <u>NM_012427</u> | 9 | 3671 | ACAUUCAAC | 3663 | 3 UTR | 0.0105 | 2 |
| <u>CLK7</u>     | <u>NM_005046</u> | 7 | 2843 | ACAUUCA   | 2837 | 3 UTR | 0.0141 | 2 |
| <u>KLRF1</u>    | <u>NM_016523</u> | 7 | 2411 | ACAUUCA   | 2405 | 3 UTR | 0.0488 | 2 |
| <u>KPNA4</u>    | <u>NM_002268</u> | 9 | 6688 | ACAUUCAAC | 6680 | 3 UTR | 0.0242 | 2 |
| <u>KRT40</u>    | <u>NM_182497</u> | 8 | 3172 | ACAUUCA   | 3165 | 3 UTR | 0.0489 | 2 |
| <u>KRTAP4-5</u> | <u>NM_033188</u> | 8 | 1382 | ACAUUCA   | 1375 | 3 UTR | 0.0266 | 2 |
| <u>KRTCAP2</u>  | <u>NM_173852</u> | 7 | 2634 | AACAUUC   | 2628 | 3 UTR | 0.0364 | 1 |
| <u>LACE1</u>    | <u>NM_145315</u> | 9 | 1975 | AACAUUCA  | 1967 | 3 UTR | 0.0046 | 1 |
| <u>LAMA3</u>    | <u>NM_198129</u> | 8 | 1974 | ACAUUCA   | 1967 | 3 UTR | 0.0182 | 2 |
| <u>LAMC1</u>    | <u>NM_002293</u> | 8 | 2350 | AACAUUCA  | 2343 | 3 UTR | 0.0281 | 1 |
| <u>LAPTM4B</u>  | <u>NM_018407</u> | 8 | 4431 | AACAUUCA  | 4424 | 3 UTR | 0.0485 | 1 |
| <u>LARP4</u>    | <u>NM_199188</u> | 8 | 1003 | ACAUUCA   | 996  | 3 UTR | 0.0171 | 2 |
| <u>LAS1L</u>    | <u>NM_031206</u> | 8 | 3690 | AACAUUCA  | 3683 | 3 UTR | 0.0312 | 1 |
| <u>LASS3</u>    | <u>NM_178842</u> | 8 | 3749 | AACAUUCA  | 3742 | 3 UTR | 0.0057 | 1 |
| <u>LATS2</u>    | <u>NM_014572</u> | 7 | 3748 | ACAUUCA   | 3742 | 3 UTR | 0.0226 | 2 |
| <u>LBR</u>      | <u>NM_002296</u> | 8 | 4347 | AACAUUCA  | 4340 | 3 UTR | 0.0460 | 1 |
| <u>LCOR</u>     | <u>NM_032440</u> | 8 | 2573 | AACAUUCA  | 2566 | 3 UTR | 0.0460 | 1 |
| <u>LEAP2</u>    | <u>NM_052971</u> | 7 | 2012 | AACAUUC   | 2006 | 3 UTR | 0.0224 | 1 |

|                  |                     |   |      |           |      |       |        |   |
|------------------|---------------------|---|------|-----------|------|-------|--------|---|
| <u>LHFPL3</u>    | <u>NM_199000</u>    | 8 | 3684 | ACAUCUA   | 3677 | 3 UTR | 0.0493 | 1 |
| <u>LHX3</u>      | <u>NM_014564</u>    | 9 | 1328 | ACAUCUCAA | 1320 | 3 UTR | 0.0054 | 1 |
| <u>LHX6</u>      | <u>NM_014368</u>    | 8 | 1327 | ACAUCUCAA | 1320 | 3 UTR | 0.0215 | 2 |
| <u>LIG4</u>      | <u>NM_002312</u>    | 7 | 1844 | ACAUCUA   | 1838 | 3 UTR | 0.0412 | 2 |
| <u>LILRB3</u>    | <u>NM_001081450</u> | 8 | 3287 | ACAUCUA   | 3280 | 3 UTR | 0.0268 | 1 |
| <u>LIN7C</u>     | <u>NM_018362</u>    | 8 | 3029 | ACAUCUCAA | 3022 | 3 UTR | 0.0268 | 2 |
| <u>LMAN1</u>     | <u>NM_005570</u>    | 8 | 2955 | ACAUCUA   | 2948 | 3 UTR | 0.0128 | 1 |
| <u>LMBRD2</u>    | <u>NM_001007527</u> | 7 | 2608 | ACAUCUA   | 2602 | 3 UTR | 0.0488 | 2 |
| <u>LMO1</u>      | <u>NM_002315</u>    | 7 | 3789 | ACAUCUC   | 3783 | 3 UTR | 0.0287 | 1 |
| <u>LMO3</u>      | <u>NM_018640</u>    | 7 | 4710 | ACAUCUA   | 4704 | 3 UTR | 0.0287 | 2 |
| <u>LOC196415</u> | <u>NM_001101339</u> | 8 | 2983 | ACAUCUCAA | 2976 | 3 UTR | 0.0130 | 2 |
| <u>LOC389073</u> | <u>NM_001099334</u> | 7 | 1609 | ACAUCUC   | 1603 | 3 UTR | 0.0450 | 1 |
| <u>LOC440087</u> | <u>NM_001013698</u> | 9 | 5627 | ACAUCUCAA | 5619 | 3 UTR | 0.0169 | 1 |
| <u>LOC493869</u> | <u>NM_001008397</u> | 7 | 1060 | ACAUCUA   | 1054 | 3 UTR | 0.0133 | 2 |
| <u>LOC644096</u> | <u>NM_001042631</u> | 8 | 3433 | ACAUCUA   | 3426 | 3 UTR | 0.0377 | 1 |
| <u>LOC729830</u> | <u>NM_001109977</u> | 7 | 2780 | ACAUCUA   | 2774 | 3 UTR | 0.0198 | 2 |
| <u>LOC751071</u> | <u>NM_001043229</u> | 8 | 1835 | ACAUCUCAA | 1828 | 3 UTR | 0.0150 | 2 |
| <u>LONRF1</u>    | <u>NM_152271</u>    | 8 | 4610 | ACAUCUA   | 4603 | 3 UTR | 0.0241 | 1 |
| <u>LPCAT2</u>    | <u>NM_017839</u>    | 9 | 3673 | ACAUCUCAA | 3665 | 3 UTR | 0.0131 | 1 |
| <u>LRGUK</u>     | <u>NM_144648</u>    | 8 | 3316 | ACAUCUA   | 3309 | 3 UTR | 0.0268 | 1 |
| <u>LRP11</u>     | <u>NM_032832</u>    | 7 | 7720 | ACAUCUC   | 7714 | 3 UTR | 0.0491 | 1 |
| <u>LRP2BP</u>    | <u>NM_018409</u>    | 7 | 4486 | ACAUCUA   | 4480 | 3 UTR | 0.0491 | 2 |
| <u>LRP4</u>      | <u>NM_002334</u>    | 7 | 4345 | ACAUCUA   | 4339 | 3 UTR | 0.0491 | 2 |
| <u>LRRC48</u>    | <u>NM_001130090</u> | 7 | 3915 | ACAUCUA   | 3909 | 3 UTR | 0.0491 | 2 |
| <u>LRRC8D</u>    | <u>NM_001134479</u> | 7 | 3849 | ACAUCUC   | 3843 | 3 UTR | 0.0353 | 1 |
| <u>LRRFIP1</u>   | <u>NM_004735</u>    | 7 | 5876 | ACAUCUC   | 5870 | 3 UTR | 0.0064 | 1 |
| <u>LRRK2</u>     | <u>NM_198578</u>    | 7 | 3641 | ACAUCUC   | 3635 | 3 UTR | 0.0064 | 1 |
| <u>LRRN1</u>     | <u>NM_020873</u>    | 7 | 5363 | ACAUCUA   | 5357 | 3 UTR | 0.0064 | 2 |
| <u>LTBP2</u>     | <u>NM_000428</u>    | 8 | 3952 | ACAUCUA   | 3945 | 3 UTR | 0.0325 | 1 |
| <u>LTV1</u>      | <u>NM_032860</u>    | 8 | 3009 | ACAUCUA   | 3002 | 3 UTR | 0.0241 | 1 |
| <u>LYG2</u>      | <u>NM_175735</u>    | 8 | 2814 | ACAUCUA   | 2807 | 3 UTR | 0.0178 | 1 |
| <u>LYPLA2</u>    | <u>NM_007260</u>    | 7 | 6498 | ACAUCUC   | 6492 | 3 UTR | 0.0121 | 1 |
| <u>LYRM1</u>     | <u>NM_001128301</u> | 7 | 4595 | ACAUCUA   | 4589 | 3 UTR | 0.0121 | 2 |
| <u>LYSMD3</u>    | <u>NM_198273</u>    | 8 | 2478 | ACAUCUCAA | 2471 | 3 UTR | 0.0327 | 2 |
| <u>MAB21L2</u>   | <u>NM_006439</u>    | 9 | 2591 | ACAUCUCAA | 2583 | 3 UTR | 0.0040 | 1 |
| <u>MAEL</u>      | <u>NM_032858</u>    | 8 | 2590 | ACAUCUCAA | 2583 | 3 UTR | 0.0158 | 2 |
| <u>MAGEA4</u>    | <u>NM_002362</u>    | 9 | 2948 | ACAUCUCAA | 2940 | 3 UTR | 0.0085 | 1 |
| <u>MAGI3</u>     | <u>NM_152900</u>    | 8 | 2947 | ACAUCUCAA | 2940 | 3 UTR | 0.0335 | 2 |
| <u>MALT1</u>     | <u>NM_006785</u>    | 8 | 1799 | ACAUCUA   | 1792 | 3 UTR | 0.0233 | 1 |
| <u>MAOA</u>      | <u>NM_000240</u>    | 8 | 602  | ACAUCUCAA | 595  | 3 UTR | 0.0473 | 2 |
| <u>MAP2K1</u>    | <u>NM_002755</u>    | 8 | 1708 | ACAUCUCAA | 1701 | 3 UTR | 0.0331 | 2 |

|                 |                     |    |      |            |      |       |        |   |
|-----------------|---------------------|----|------|------------|------|-------|--------|---|
| <u>MAP3K10</u>  | <u>NM_002446</u>    | 8  | 1900 | AACAUUCA   | 1893 | 3 UTR | 0.0118 | 1 |
| <u>MAP3K8</u>   | <u>NM_005204</u>    | 7  | 1899 | ACAUUCA    | 1893 | 3 UTR | 0.0463 | 2 |
| <u>MAP3K9</u>   | <u>NM_033141</u>    | 8  | 1651 | ACAUUCA    | 1644 | 3 UTR | 0.0092 | 2 |
| <u>MAP6</u>     | <u>NM_207577</u>    | 8  | 2835 | AACAUUCA   | 2828 | 3 UTR | 0.0491 | 1 |
| <u>MAPK1</u>    | <u>NM_002745</u>    | 7  | 757  | AACAUUC    | 751  | 3 UTR | 0.0082 | 1 |
| <u>MARK1</u>    | <u>NM_018650</u>    | 7  | 3309 | ACAUUCA    | 3303 | 3 UTR | 0.0439 | 2 |
| <u>MBD4</u>     | <u>NM_003925</u>    | 8  | 2280 | ACAUUCA    | 2273 | 3 UTR | 0.0064 | 2 |
| <u>MBNL2</u>    | <u>NM_144778</u>    | 7  | 2093 | ACAUUCA    | 2087 | 3 UTR | 0.0368 | 2 |
| <u>MBTPS2</u>   | <u>NM_015884</u>    | 7  | 4343 | AACAUUC    | 4337 | 3 UTR | 0.0428 | 1 |
| <u>MCM10</u>    | <u>NM_182751</u>    | 7  | 3225 | AACAUUC    | 3219 | 3 UTR | 0.0460 | 1 |
| <u>MCM3</u>     | <u>NM_002388</u>    | 8  | 1134 | ACAUUCA    | 1127 | 3 UTR | 0.0148 | 2 |
| <u>MDH1B</u>    | <u>NM_001039845</u> | 9  | 548  | AACAUUCA   | 540  | 3 UTR | 0.0010 | 1 |
| <u>MDM2</u>     | <u>NM_002392</u>    | 8  | 547  | ACAUUCA    | 540  | 3 UTR | 0.0041 | 2 |
| <u>ME2</u>      | <u>NM_002396</u>    | 8  | 2235 | AACAUUCA   | 2228 | 3 UTR | 0.0387 | 1 |
| <u>MED10</u>    | <u>NM_032286</u>    | 9  | 5171 | ACAUUCAAC  | 5163 | 3 UTR | 0.0060 | 2 |
| <u>MEGF11</u>   | <u>NM_032445</u>    | 7  | 824  | ACAUUCA    | 818  | 3 UTR | 0.0034 | 2 |
| <u>MELK</u>     | <u>NM_014791</u>    | 9  | 6873 | AACAUUCA   | 6865 | 3 UTR | 0.0092 | 1 |
| <u>MEPE</u>     | <u>NM_020203</u>    | 8  | 6872 | ACAUUCA    | 6865 | 3 UTR | 0.0364 | 2 |
| <u>MERTK</u>    | <u>NM_006343</u>    | 7  | 1254 | ACAUUCA    | 1248 | 3 UTR | 0.0262 | 2 |
| <u>METAP1</u>   | <u>NM_015143</u>    | 7  | 1209 | ACAUUCA    | 1203 | 3 UTR | 0.0262 | 2 |
| <u>METAP2</u>   | <u>NM_006838</u>    | 8  | 2411 | AACAUUCA   | 2404 | 3 UTR | 0.0449 | 1 |
| <u>MEX3B</u>    | <u>NM_032246</u>    | 10 | 1055 | AACAUUCAAC | 1046 | 3 UTR | 0.0007 | 1 |
| <u>MFSD8</u>    | <u>NM_152778</u>    | 9  | 1054 | ACAUUCAAC  | 1046 | 3 UTR | 0.0027 | 2 |
| <u>MGC16169</u> | <u>NM_033115</u>    | 7  | 1551 | ACAUUCA    | 1545 | 3 UTR | 0.0357 | 2 |
| <u>MGC39900</u> | <u>NM_194324</u>    | 9  | 5399 | AACAUUCA   | 5391 | 3 UTR | 0.0130 | 1 |
| <u>MIA2</u>     | <u>NM_054024</u>    | 9  | 8488 | AACAUUCA   | 8480 | 3 UTR | 0.0450 | 1 |
| <u>MID2</u>     | <u>NM_012216</u>    | 8  | 2239 | ACAUUCA    | 2232 | 3 UTR | 0.0247 | 2 |
| <u>MINA</u>     | <u>NM_001042533</u> | 8  | 1150 | AACAUUCA   | 1143 | 3 UTR | 0.0146 | 1 |
| <u>MINK1</u>    | <u>NM_153827</u>    | 8  | 1859 | ACAUUCA    | 1852 | 3 UTR | 0.0118 | 2 |
| <u>MKLN1</u>    | <u>NM_013255</u>    | 8  | 3774 | AACAUUCA   | 3767 | 3 UTR | 0.0264 | 1 |
| <u>MKNK2</u>    | <u>NM_199054</u>    | 7  | 2101 | AACAUUC    | 2095 | 3 UTR | 0.0273 | 1 |
| <u>MLF1</u>     | <u>NM_001130157</u> | 8  | 4455 | ACAUUCA    | 4448 | 3 UTR | 0.0414 | 2 |
| <u>MLL5</u>     | <u>NM_182931</u>    | 9  | 5631 | ACAUUCAAC  | 5623 | 3 UTR | 0.0201 | 2 |
| <u>MLLT10</u>   | <u>NM_004641</u>    | 8  | 1480 | AACAUUCA   | 1473 | 3 UTR | 0.0120 | 1 |
| <u>MMP10</u>    | <u>NM_002425</u>    | 7  | 1479 | ACAUUCA    | 1473 | 3 UTR | 0.0472 | 2 |
| <u>MMP7</u>     | <u>NM_002423</u>    | 8  | 2141 | AACAUUCA   | 2134 | 3 UTR | 0.0080 | 1 |
| <u>MOCS2</u>    | <u>NM_004531</u>    | 7  | 2140 | ACAUUCA    | 2134 | 3 UTR | 0.0317 | 2 |
| <u>MORC3</u>    | <u>NM_015358</u>    | 7  | 1173 | ACAUUCA    | 1167 | 3 UTR | 0.0258 | 2 |
| <u>MOSC2</u>    | <u>NM_017898</u>    | 9  | 1673 | AACAUUCA   | 1665 | 3 UTR | 0.0016 | 1 |
| <u>MPP5</u>     | <u>NM_022474</u>    | 8  | 1672 | ACAUUCA    | 1665 | 3 UTR | 0.0064 | 2 |
| <u>MPP7</u>     | <u>NM_173496</u>    | 8  | 2127 | ACAUUCA    | 2120 | 3 UTR | 0.0280 | 2 |

|                 |                     |    |      |            |      |       |        |   |
|-----------------|---------------------|----|------|------------|------|-------|--------|---|
| <u>MRPS14</u>   | <u>NM_022100</u>    | 8  | 2342 | ACAUUCA    | 2335 | 3 UTR | 0.0067 | 2 |
| <u>MRPS16</u>   | <u>NM_016065</u>    | 7  | 698  | AACAUUC    | 692  | 3 UTR | 0.0083 | 1 |
| <u>MRPS18B</u>  | <u>NM_014046</u>    | 8  | 1476 | ACAUUCA    | 1469 | 3 UTR | 0.0443 | 2 |
| <u>MRPS23</u>   | <u>NM_016070</u>    | 7  | 2621 | AACAUUC    | 2615 | 3 UTR | 0.0418 | 1 |
| <u>MRPS27</u>   | <u>NM_015084</u>    | 7  | 2361 | ACAUUCA    | 2355 | 3 UTR | 0.0198 | 2 |
| <u>MRPS35</u>   | <u>NM_021821</u>    | 7  | 765  | AACAUUC    | 759  | 3 UTR | 0.0160 | 1 |
| <u>MRPS9</u>    | <u>NM_182640</u>    | 8  | 1577 | ACAUUCA    | 1570 | 3 UTR | 0.0231 | 2 |
| <u>MS4A1</u>    | <u>NM_152866</u>    | 8  | 2033 | AACAUUCA   | 2026 | 3 UTR | 0.0130 | 1 |
| <u>MSI2</u>     | <u>NM_170721</u>    | 8  | 1054 | ACAUUCA    | 1047 | 3 UTR | 0.0093 | 2 |
| <u>MTF2</u>     | <u>NM_007358</u>    | 8  | 2092 | AACAUUCA   | 2085 | 3 UTR | 0.0032 | 1 |
| <u>MTL5</u>     | <u>NM_001039656</u> | 7  | 2091 | ACAUUCA    | 2085 | 3 UTR | 0.0127 | 2 |
| <u>MTMR1</u>    | <u>NM_003828</u>    | 9  | 3632 | AACAUUCA   | 3624 | 3 UTR | 0.0059 | 1 |
| <u>MTMR10</u>   | <u>NM_017762</u>    | 8  | 3631 | ACAUUCA    | 3624 | 3 UTR | 0.0233 | 2 |
| <u>MTMR12</u>   | <u>NM_001040446</u> | 9  | 2748 | AACAUUCA   | 2740 | 3 UTR | 0.0022 | 1 |
| <u>MTMR15</u>   | <u>NM_014967</u>    | 8  | 2747 | ACAUUCA    | 2740 | 3 UTR | 0.0088 | 2 |
| <u>MTMR6</u>    | <u>NM_004685</u>    | 7  | 1370 | AACAUUC    | 1364 | 3 UTR | 0.0066 | 1 |
| <u>MTPN</u>     | <u>NM_145808</u>    | 8  | 1908 | AACAUUCA   | 1901 | 3 UTR | 0.0176 | 1 |
| <u>MTX2</u>     | <u>NM_001006635</u> | 7  | 932  | ACAUUCA    | 926  | 3 UTR | 0.0360 | 2 |
| <u>MUC13</u>    | <u>NM_033049</u>    | 8  | 2331 | AACAUUCA   | 2324 | 3 UTR | 0.0464 | 1 |
| <u>MUC7</u>     | <u>NM_152291</u>    | 8  | 3779 | AACAUUCA   | 3772 | 3 UTR | 0.0419 | 1 |
| <u>MUL1</u>     | <u>NM_024544</u>    | 10 | 739  | AACAUUCAAC | 730  | 3 UTR | 0.0003 | 1 |
| <u>MUT</u>      | <u>NM_000255</u>    | 9  | 738  | ACAUUCAAC  | 730  | 3 UTR | 0.0012 | 2 |
| <u>MYADM</u>    | <u>NM_001020818</u> | 9  | 597  | ACAUUCAAC  | 589  | 3 UTR | 0.0012 | 2 |
| <u>MYBL1</u>    | <u>NM_001080416</u> | 8  | 1328 | ACAUUCA    | 1321 | 3 UTR | 0.0083 | 2 |
| <u>MYBPC1</u>   | <u>NM_002465</u>    | 7  | 825  | AACAUUC    | 819  | 3 UTR | 0.0312 | 1 |
| <u>MYH10</u>    | <u>NM_005964</u>    | 7  | 2982 | ACAUUCA    | 2976 | 3 UTR | 0.0444 | 2 |
| <u>MYL1</u>     | <u>NM_079420</u>    | 8  | 8448 | AACAUUCA   | 8441 | 3 UTR | 0.0445 | 1 |
| <u>MYO15A</u>   | <u>NM_016239</u>    | 8  | 3247 | AACAUUCA   | 3240 | 3 UTR | 0.0179 | 1 |
| <u>MYO7B</u>    | <u>NM_001080527</u> | 7  | 1975 | ACAUUCA    | 1969 | 3 UTR | 0.0470 | 2 |
| <u>MYO9B</u>    | <u>NM_001130065</u> | 8  | 6117 | ACAUUCA    | 6110 | 3 UTR | 0.0206 | 2 |
| <u>NAALADL2</u> | <u>NM_207015</u>    | 7  | 4063 | ACAUUCA    | 4057 | 3 UTR | 0.0459 | 2 |
| <u>NAP1L2</u>   | <u>NM_021963</u>    | 8  | 3288 | ACAUUCA    | 3281 | 3 UTR | 0.0169 | 2 |
| <u>NCAPG</u>    | <u>NM_022346</u>    | 7  | 3571 | AACAUUC    | 3565 | 3 UTR | 0.0283 | 1 |
| <u>NCAPH</u>    | <u>NM_015341</u>    | 8  | 1851 | AACAUUCA   | 1844 | 3 UTR | 0.0396 | 1 |
| <u>NCL</u>      | <u>NM_005381</u>    | 7  | 3087 | AACAUUC    | 3081 | 3 UTR | 0.0252 | 1 |
| <u>NCOA2</u>    | <u>NM_006540</u>    | 8  | 2227 | AACAUUCA   | 2220 | 3 UTR | 0.0187 | 1 |
| <u>NCOA7</u>    | <u>NM_181782</u>    | 9  | 6181 | ACAUUCAAC  | 6173 | 3 UTR | 0.0094 | 2 |
| <u>NCR2</u>     | <u>NM_004828</u>    | 8  | 4696 | ACAUUCA    | 4689 | 3 UTR | 0.0215 | 2 |
| <u>NDUFB1</u>   | <u>NM_004545</u>    | 9  | 3993 | AACAUUCA   | 3985 | 3 UTR | 0.0218 | 1 |
| <u>NEBL</u>     | <u>NM_006393</u>    | 7  | 1144 | AACAUUC    | 1138 | 3 UTR | 0.0092 | 1 |
| <u>NEK9</u>     | <u>NM_033116</u>    | 8  | 6355 | ACAUUCA    | 6348 | 3 UTR | 0.0152 | 2 |



|               |                     |    |      |            |      |       |        |   |
|---------------|---------------------|----|------|------------|------|-------|--------|---|
| <u>NELL2</u>  | <u>NM_006159</u>    | 9  | 5689 | ACAUUCAAC  | 5681 | 3 UTR | 0.0029 | 2 |
| <u>NEO1</u>   | <u>NM_002499</u>    | 7  | 4472 | ACAUUCA    | 4466 | 3 UTR | 0.0360 | 2 |
| <u>NFAT5</u>  | <u>NM_138714</u>    | 9  | 3704 | ACAUUCAAC  | 3696 | 3 UTR | 0.0241 | 2 |
| <u>NFYC</u>   | <u>NM_014223</u>    | 8  | 5014 | ACAUUCA    | 5007 | 3 UTR | 0.0267 | 2 |
| <u>NIPBL</u>  | <u>NM_015384</u>    | 7  | 4224 | AACAUUC    | 4218 | 3 UTR | 0.0365 | 1 |
| <u>NKTR</u>   | <u>NM_005385</u>    | 7  | 1054 | ACAUUCA    | 1048 | 3 UTR | 0.0147 | 2 |
| <u>NLK</u>    | <u>NM_016231</u>    | 8  | 3259 | ACAUUCA    | 3252 | 3 UTR | 0.0242 | 2 |
| <u>NLN</u>    | <u>NM_020726</u>    | 10 | 4768 | AACAUUCAAC | 4759 | 3 UTR | 0.0066 | 1 |
| <u>NME6</u>   | <u>NM_005793</u>    | 9  | 4767 | ACAUUCAAC  | 4759 | 3 UTR | 0.0260 | 2 |
| <u>NMT2</u>   | <u>NM_004808</u>    | 8  | 4032 | ACAUUCA    | 4025 | 3 UTR | 0.0435 | 2 |
| <u>NOL4</u>   | <u>NM_003787</u>    | 8  | 1814 | ACAUUCA    | 1807 | 3 UTR | 0.0422 | 2 |
| <u>NOL8</u>   | <u>NM_017948</u>    | 9  | 7858 | AACAUUCA   | 7850 | 3 UTR | 0.0204 | 1 |
| <u>NOL9</u>   | <u>NM_024654</u>    | 9  | 5043 | AACAUUCA   | 5035 | 3 UTR | 0.0134 | 1 |
| <u>NOS1AP</u> | <u>NM_001126060</u> | 9  | 3188 | AACAUUCA   | 3180 | 3 UTR | 0.0039 | 1 |
| <u>NOS3</u>   | <u>NM_000603</u>    | 8  | 3187 | ACAUUCA    | 3180 | 3 UTR | 0.0154 | 2 |
| <u>NOTCH4</u> | <u>NM_004557</u>    | 8  | 1412 | AACAUUCA   | 1405 | 3 UTR | 0.0361 | 1 |
| <u>NOVA1</u>  | <u>NM_002515</u>    | 9  | 3224 | AACAUUCA   | 3216 | 3 UTR | 0.0073 | 1 |
| <u>NPAT</u>   | <u>NM_002519</u>    | 8  | 3223 | ACAUUCA    | 3216 | 3 UTR | 0.0288 | 2 |
| <u>NPFFR2</u> | <u>NM_004885</u>    | 8  | 4170 | AACAUUCA   | 4163 | 3 UTR | 0.0239 | 1 |
| <u>NPM1</u>   | <u>NM_002520</u>    | 8  | 4049 | ACAUUCA    | 4042 | 3 UTR | 0.0469 | 2 |
| <u>NPTN</u>   | <u>NM_012428</u>    | 8  | 1849 | AACAUUCA   | 1842 | 3 UTR | 0.0202 | 1 |
| <u>NPTXR</u>  | <u>NM_014293</u>    | 9  | 5178 | AACAUUCA   | 5170 | 3 UTR | 0.0206 | 1 |
| <u>NR1D2</u>  | <u>NM_005126</u>    | 8  | 3176 | AACAUUCA   | 3169 | 3 UTR | 0.0291 | 1 |
| <u>NR3C1</u>  | <u>NM_001018077</u> | 8  | 1801 | AACAUUCA   | 1794 | 3 UTR | 0.0225 | 1 |
| <u>NR4A3</u>  | <u>NM_173198</u>    | 7  | 2325 | ACAUUCA    | 2319 | 3 UTR | 0.0427 | 2 |
| <u>NR6A1</u>  | <u>NM_033334</u>    | 7  | 5308 | AACAUUC    | 5302 | 3 UTR | 0.0267 | 1 |
| <u>NRAS</u>   | <u>NM_002524</u>    | 7  | 5238 | AACAUUC    | 5232 | 3 UTR | 0.0267 | 1 |
| <u>NSF</u>    | <u>NM_006178</u>    | 7  | 4427 | AACAUUC    | 4421 | 3 UTR | 0.0267 | 1 |
| <u>NSL1</u>   | <u>NM_001042549</u> | 7  | 3784 | AACAUUC    | 3778 | 3 UTR | 0.0267 | 1 |
| <u>NSMAF</u>  | <u>NM_003580</u>    | 8  | 3700 | ACAUUCA    | 3693 | 3 UTR | 0.0067 | 2 |
| <u>NSUN7</u>  | <u>NM_024677</u>    | 8  | 2859 | AACAUUCA   | 2852 | 3 UTR | 0.0451 | 1 |
| <u>NTS</u>    | <u>NM_006183</u>    | 9  | 860  | AACAUUCA   | 852  | 3 UTR | 0.0034 | 1 |
| <u>NTSR2</u>  | <u>NM_012344</u>    | 8  | 859  | ACAUUCA    | 852  | 3 UTR | 0.0137 | 2 |
| <u>NUBP1</u>  | <u>NM_002484</u>    | 8  | 1080 | ACAUUCA    | 1073 | 3 UTR | 0.0035 | 2 |
| <u>NUFIP1</u> | <u>NM_012345</u>    | 8  | 3325 | AACAUUCA   | 3318 | 3 UTR | 0.0186 | 1 |
| <u>NUP50</u>  | <u>NM_007172</u>    | 9  | 7317 | ACAUUCAAC  | 7309 | 3 UTR | 0.0139 | 2 |
| <u>OCA2</u>   | <u>NM_000275</u>    | 8  | 4435 | AACAUUCA   | 4428 | 3 UTR | 0.0170 | 1 |
| <u>OGFRL1</u> | <u>NM_024576</u>    | 8  | 4596 | ACAUUCA    | 4589 | 3 UTR | 0.0170 | 2 |
| <u>OMA1</u>   | <u>NM_145243</u>    | 7  | 4073 | ACAUUCA    | 4067 | 3 UTR | 0.0220 | 2 |
| <u>OPN5</u>   | <u>NM_181744</u>    | 8  | 2237 | AACAUUCA   | 2230 | 3 UTR | 0.0040 | 1 |
| <u>OR51E2</u> | <u>NM_030774</u>    | 7  | 2236 | ACAUUCA    | 2230 | 3 UTR | 0.0157 | 2 |

|                 |                     |    |       |             |       |       |        |   |
|-----------------|---------------------|----|-------|-------------|-------|-------|--------|---|
| <u>OSBPL2</u>   | <u>NM_144498</u>    | 9  | 5252  | ACAUCUCAA   | 5244  | 3 UTR | 0.0133 | 1 |
| <u>OSBPL3</u>   | <u>NM_015550</u>    | 9  | 6034  | ACAUCUCAA   | 6026  | 3 UTR | 0.0034 | 2 |
| <u>OSBPL8</u>   | <u>NM_020841</u>    | 9  | 4182  | ACAUCUCAA   | 4174  | 3 UTR | 0.0046 | 2 |
| <u>OTUB2</u>    | <u>NM_023112</u>    | 8  | 4157  | ACAUCUCAA   | 4150  | 3 UTR | 0.0181 | 2 |
| <u>OXGR1</u>    | <u>NM_080818</u>    | 9  | 4685  | ACAUCUCAA   | 4677  | 3 UTR | 0.0147 | 2 |
| <u>P4HA2</u>    | <u>NM_004199</u>    | 10 | 5952  | ACAUCUCAACG | 5943  | 3 UTR | 0.0021 | 2 |
| <u>P76</u>      | <u>NM_173542</u>    | 9  | 6867  | ACAUCUCAA   | 6859  | 3 UTR | 0.0188 | 1 |
| <u>PABPC4L</u>  | <u>NM_001114734</u> | 9  | 6656  | ACAUCUCAA   | 6648  | 3 UTR | 0.0104 | 2 |
| <u>PABPC5</u>   | <u>NM_080832</u>    | 8  | 4413  | ACAUCUCAA   | 4406  | 3 UTR | 0.0327 | 2 |
| <u>PAFAH1B2</u> | <u>NM_002572</u>    | 7  | 2567  | AACAUUC     | 2561  | 3 UTR | 0.0361 | 1 |
| <u>PAG1</u>     | <u>NM_018440</u>    | 7  | 2727  | ACAUCUCAA   | 2721  | 3 UTR | 0.0361 | 2 |
| <u>PAK4</u>     | <u>NM_001014831</u> | 8  | 3613  | AACAUUCA    | 3606  | 3 UTR | 0.0090 | 1 |
| <u>PAN3</u>     | <u>NM_175854</u>    | 7  | 3612  | ACAUCUCAA   | 3606  | 3 UTR | 0.0354 | 2 |
| <u>PANK2</u>    | <u>NM_153638</u>    | 7  | 1496  | AACAUUC     | 1490  | 3 UTR | 0.0404 | 1 |
| <u>PANK3</u>    | <u>NM_024594</u>    | 7  | 1238  | ACAUCUCAA   | 1232  | 3 UTR | 0.0308 | 2 |
| <u>PAP2D</u>    | <u>NM_001037317</u> | 8  | 4874  | AACAUUCA    | 4867  | 3 UTR | 0.0295 | 1 |
| <u>PAPD5</u>    | <u>NM_001040284</u> | 9  | 1515  | AACAUUCUCAA | 1507  | 3 UTR | 0.0019 | 1 |
| <u>PARD6B</u>   | <u>NM_032521</u>    | 8  | 1514  | ACAUCUCAA   | 1507  | 3 UTR | 0.0076 | 2 |
| <u>PARD6G</u>   | <u>NM_032510</u>    | 7  | 3107  | AACAUUC     | 3101  | 3 UTR | 0.0370 | 1 |
| <u>PARK2</u>    | <u>NM_004562</u>    | 8  | 3153  | ACAUCUCAA   | 3146  | 3 UTR | 0.0473 | 2 |
| <u>PARP2</u>    | <u>NM_005484</u>    | 9  | 2485  | ACAUCUCAA   | 2477  | 3 UTR | 0.0185 | 2 |
| <u>PAWR</u>     | <u>NM_002583</u>    | 8  | 3404  | AACAUUCA    | 3397  | 3 UTR | 0.0173 | 1 |
| <u>PAX5</u>     | <u>NM_016734</u>    | 8  | 3329  | ACAUCUCAA   | 3322  | 3 UTR | 0.0173 | 2 |
| <u>PBRM1</u>    | <u>NM_018313</u>    | 7  | 1103  | ACAUCUCAA   | 1097  | 3 UTR | 0.0230 | 2 |
| <u>PBX3</u>     | <u>NM_006195</u>    | 7  | 1336  | AACAUUC     | 1330  | 3 UTR | 0.0202 | 1 |
| <u>PCAF</u>     | <u>NM_003884</u>    | 8  | 1880  | ACAUCUCAA   | 1873  | 3 UTR | 0.0161 | 2 |
| <u>PCBP1</u>    | <u>NM_006196</u>    | 8  | 1231  | AACAUUCA    | 1224  | 3 UTR | 0.0073 | 1 |
| <u>PCDH11X</u>  | <u>NM_032968</u>    | 8  | 2797  | AACAUUCA    | 2790  | 3 UTR | 0.0292 | 1 |
| <u>PCDH11Y</u>  | <u>NM_032973</u>    | 8  | 1337  | AACAUUCA    | 1330  | 3 UTR | 0.0073 | 1 |
| <u>PCDH15</u>   | <u>NM_033056</u>    | 7  | 1336  | ACAUCUCAA   | 1330  | 3 UTR | 0.0289 | 2 |
| <u>PCDH19</u>   | <u>NM_001105243</u> | 7  | 615   | ACAUCUCAA   | 609   | 3 UTR | 0.0209 | 2 |
| <u>PCDHA10</u>  | <u>NM_018901</u>    | 8  | 526   | AACAUUCA    | 519   | 3 UTR | 0.0009 | 1 |
| <u>PCDHA2</u>   | <u>NM_018905</u>    | 7  | 525   | ACAUCUCAA   | 519   | 3 UTR | 0.0038 | 2 |
| <u>PCDHA5</u>   | <u>NM_018908</u>    | 7  | 1888  | ACAUCUCAA   | 1882  | 3 UTR | 0.0377 | 2 |
| <u>PCDHA6</u>   | <u>NM_018909</u>    | 7  | 10338 | AACAUUC     | 10332 | 3 UTR | 0.0255 | 1 |
| <u>PCDHA9</u>   | <u>NM_014005</u>    | 8  | 6593  | AACAUUCA    | 6586  | 3 UTR | 0.0419 | 1 |
| <u>PCDHAC1</u>  | <u>NM_018898</u>    | 8  | 2187  | ACAUCUCAA   | 2180  | 3 UTR | 0.0171 | 2 |
| <u>PCDHAC2</u>  | <u>NM_018899</u>    | 9  | 5092  | AACAUUCUCAA | 5084  | 3 UTR | 0.0157 | 1 |
| <u>PCDHB3</u>   | <u>NM_018937</u>    | 8  | 2424  | ACAUCUCAA   | 2417  | 3 UTR | 0.0033 | 2 |
| <u>PCDHB6</u>   | <u>NM_018939</u>    | 9  | 3646  | AACAUUCUCAA | 3638  | 3 UTR | 0.0088 | 1 |
| <u>PCGF2</u>    | <u>NM_007144</u>    | 8  | 3645  | ACAUCUCAA   | 3638  | 3 UTR | 0.0348 | 2 |

|                |                     |    |      |            |      |       |        |   |
|----------------|---------------------|----|------|------------|------|-------|--------|---|
| <u>PCID2</u>   | <u>NM_018386</u>    | 8  | 4819 | AACAUUCA   | 4812 | 3 UTR | 0.0278 | 1 |
| <u>PCNP</u>    | <u>NM_020357</u>    | 8  | 2664 | ACAUUCA    | 2657 | 3 UTR | 0.0273 | 2 |
| <u>PCSK1</u>   | <u>NM_000439</u>    | 8  | 2011 | AACAUUCA   | 2004 | 3 UTR | 0.0448 | 1 |
| <u>PDAP1</u>   | <u>NM_014891</u>    | 7  | 435  | AACAUUC    | 429  | 3 UTR | 0.0267 | 1 |
| <u>PDCD6</u>   | <u>NM_013232</u>    | 8  | 2859 | AACAUUCA   | 2852 | 3 UTR | 0.0353 | 1 |
| <u>PDE11A</u>  | <u>NM_016953</u>    | 8  | 1348 | AACAUUCA   | 1341 | 3 UTR | 0.0353 | 1 |
| <u>PDE3B</u>   | <u>NM_000922</u>    | 8  | 2332 | AACAUUCA   | 2325 | 3 UTR | 0.0164 | 1 |
| <u>PDGFRA</u>  | <u>NM_006206</u>    | 8  | 2037 | AACAUUCA   | 2030 | 3 UTR | 0.0330 | 1 |
| <u>PDIA6</u>   | <u>NM_005742</u>    | 8  | 3216 | ACAUUCA    | 3209 | 3 UTR | 0.0167 | 2 |
| <u>PDXDC1</u>  | <u>NM_015027</u>    | 8  | 2424 | AACAUUCA   | 2417 | 3 UTR | 0.0126 | 1 |
| <u>PDZD11</u>  | <u>NM_016484</u>    | 7  | 2423 | ACAUUCA    | 2417 | 3 UTR | 0.0496 | 2 |
| <u>PEBP1</u>   | <u>NM_002567</u>    | 9  | 2184 | ACAUUCAAC  | 2176 | 3 UTR | 0.0156 | 2 |
| <u>PEF1</u>    | <u>NM_012392</u>    | 9  | 3841 | AACAUUCA   | 3833 | 3 UTR | 0.0124 | 1 |
| <u>PEG3</u>    | <u>NM_006210</u>    | 8  | 1867 | AACAUUCA   | 1860 | 3 UTR | 0.0489 | 1 |
| <u>PER2</u>    | <u>NM_022817</u>    | 8  | 3840 | ACAUUCA    | 3833 | 3 UTR | 0.0489 | 2 |
| <u>PER3</u>    | <u>NM_016831</u>    | 8  | 2306 | ACAUUCA    | 2299 | 3 UTR | 0.0489 | 2 |
| <u>PERP</u>    | <u>NM_022121</u>    | 7  | 3038 | ACAUUCA    | 3032 | 3 UTR | 0.0438 | 2 |
| <u>PF4V1</u>   | <u>NM_002620</u>    | 8  | 1268 | AACAUUCA   | 1261 | 3 UTR | 0.0047 | 1 |
| <u>PGBD1</u>   | <u>NM_032507</u>    | 7  | 1267 | ACAUUCA    | 1261 | 3 UTR | 0.0185 | 2 |
| <u>PHF20L1</u> | <u>NM_016018</u>    | 10 | 1068 | AACAUUCAAC | 1059 | 3 UTR | 0.0027 | 1 |
| <u>PHF3</u>    | <u>NM_015153</u>    | 9  | 1067 | ACAUUCAAC  | 1059 | 3 UTR | 0.0108 | 2 |
| <u>PHIP</u>    | <u>NM_017934</u>    | 8  | 957  | ACAUUCA    | 950  | 3 UTR | 0.0132 | 2 |
| <u>PHLPPL</u>  | <u>NM_015020</u>    | 7  | 1181 | AACAUUC    | 1175 | 3 UTR | 0.0286 | 1 |
| <u>PHOX2B</u>  | <u>NM_003924</u>    | 8  | 1464 | AACAUUCA   | 1457 | 3 UTR | 0.0204 | 1 |
| <u>PI4K2A</u>  | <u>NM_018425</u>    | 8  | 893  | AACAUUCA   | 886  | 3 UTR | 0.0460 | 1 |
| <u>PI4K2B</u>  | <u>NM_018323</u>    | 7  | 1082 | AACAUUC    | 1076 | 3 UTR | 0.0422 | 1 |
| <u>PIAS3</u>   | <u>NM_006099</u>    | 8  | 3762 | AACAUUCA   | 3755 | 3 UTR | 0.0133 | 1 |
| <u>PIH1D2</u>  | <u>NM_001082619</u> | 8  | 1126 | AACAUUCA   | 1119 | 3 UTR | 0.0061 | 1 |
| <u>PIK3C2A</u> | <u>NM_002645</u>    | 7  | 1125 | ACAUUCA    | 1119 | 3 UTR | 0.0241 | 2 |
| <u>PIK3R3</u>  | <u>NM_003629</u>    | 8  | 2599 | ACAUUCA    | 2592 | 3 UTR | 0.0181 | 2 |
| <u>PIN4</u>    | <u>NM_006223</u>    | 7  | 5293 | ACAUUCA    | 5287 | 3 UTR | 0.0098 | 2 |
| <u>PJA2</u>    | <u>NM_014819</u>    | 7  | 3836 | ACAUUCA    | 3830 | 3 UTR | 0.0098 | 2 |
| <u>PKD2</u>    | <u>NM_000297</u>    | 7  | 3659 | ACAUUCA    | 3653 | 3 UTR | 0.0098 | 2 |
| <u>PKP2</u>    | <u>NM_004572</u>    | 7  | 3344 | ACAUUCA    | 3338 | 3 UTR | 0.0098 | 2 |
| <u>PLA2G4A</u> | <u>NM_024420</u>    | 7  | 2615 | AACAUUC    | 2609 | 3 UTR | 0.0125 | 1 |
| <u>PLA2G4C</u> | <u>NM_003706</u>    | 10 | 3290 | AACAUUCAAC | 3281 | 3 UTR | 0.0017 | 1 |
| <u>PLAC1L</u>  | <u>NM_173801</u>    | 9  | 3289 | ACAUUCAAC  | 3281 | 3 UTR | 0.0067 | 2 |
| <u>PLAC8</u>   | <u>NM_001130716</u> | 8  | 4260 | ACAUUCA    | 4253 | 3 UTR | 0.0491 | 2 |
| <u>PLD1</u>    | <u>NM_002662</u>    | 8  | 6715 | AACAUUCA   | 6708 | 3 UTR | 0.0320 | 1 |
| <u>PLDN</u>    | <u>NM_012388</u>    | 7  | 1959 | ACAUUCA    | 1953 | 3 UTR | 0.0141 | 2 |
| <u>PLEKHA1</u> | <u>NM_001001974</u> | 8  | 3304 | AACAUUCA   | 3297 | 3 UTR | 0.0120 | 1 |

|                 |                     |   |      |          |      |       |        |   |
|-----------------|---------------------|---|------|----------|------|-------|--------|---|
| <u>PLEKHJ1</u>  | <u>NM_018049</u>    | 8 | 3164 | AACAUUCA | 3157 | 3 UTR | 0.0120 | 1 |
| <u>PLRG1</u>    | <u>NM_002669</u>    | 7 | 3303 | ACAUUCA  | 3297 | 3 UTR | 0.0472 | 2 |
| <u>PLS1</u>     | <u>NM_002670</u>    | 7 | 3163 | ACAUUCA  | 3157 | 3 UTR | 0.0472 | 2 |
| <u>PMAIP1</u>   | <u>NM_021127</u>    | 8 | 4283 | AACAUUCA | 4276 | 3 UTR | 0.0270 | 1 |
| <u>PNLIPRP3</u> | <u>NM_001011709</u> | 8 | 8450 | ACAUUCA  | 8443 | 3 UTR | 0.0231 | 2 |
| <u>PNMA1</u>    | <u>NM_006029</u>    | 9 | 3470 | AACAUUCA | 3462 | 3 UTR | 0.0035 | 1 |
| <u>PNMA2</u>    | <u>NM_007257</u>    | 8 | 3469 | ACAUUCA  | 3462 | 3 UTR | 0.0138 | 2 |
| <u>PNRC1</u>    | <u>NM_006813</u>    | 9 | 6493 | ACAUUCA  | 6485 | 3 UTR | 0.0103 | 2 |
| <u>POLR2K</u>   | <u>NM_005034</u>    | 7 | 1777 | ACAUUCA  | 1771 | 3 UTR | 0.0181 | 2 |
| <u>POLR3F</u>   | <u>NM_006466</u>    | 7 | 823  | ACAUUCA  | 817  | 3 UTR | 0.0078 | 2 |
| <u>POLR3G</u>   | <u>NM_006467</u>    | 7 | 1276 | ACAUUCA  | 1270 | 3 UTR | 0.0495 | 2 |
| <u>POLR3K</u>   | <u>NM_016310</u>    | 8 | 790  | ACAUUCA  | 783  | 3 UTR | 0.0139 | 2 |
| <u>POMC</u>     | <u>NM_001035256</u> | 8 | 1278 | AACAUUCA | 1271 | 3 UTR | 0.0475 | 1 |
| <u>PPCS</u>     | <u>NM_024664</u>    | 8 | 2589 | AACAUUCA | 2582 | 3 UTR | 0.0091 | 1 |
| <u>PPP1R2</u>   | <u>NM_006241</u>    | 7 | 2588 | ACAUUCA  | 2582 | 3 UTR | 0.0360 | 2 |
| <u>PPP1R3C</u>  | <u>NM_005398</u>    | 7 | 1670 | AACAUUC  | 1664 | 3 UTR | 0.0214 | 1 |
| <u>PPP1R3D</u>  | <u>NM_006242</u>    | 7 | 1688 | ACAUUCA  | 1682 | 3 UTR | 0.0331 | 2 |
| <u>PPP1R9A</u>  | <u>NM_017650</u>    | 9 | 6009 | AACAUUCA | 6001 | 3 UTR | 0.0139 | 1 |
| <u>PPP2R3A</u>  | <u>NM_002718</u>    | 8 | 4772 | AACAUUCA | 4765 | 3 UTR | 0.0344 | 1 |
| <u>PPP3R1</u>   | <u>NM_000945</u>    | 9 | 3505 | AACAUUCA | 3497 | 3 UTR | 0.0088 | 1 |
| <u>PQLC1</u>    | <u>NM_025078</u>    | 8 | 3504 | ACAUUCA  | 3497 | 3 UTR | 0.0349 | 2 |
| <u>PRCP</u>     | <u>NM_199418</u>    | 8 | 2391 | ACAUUCA  | 2384 | 3 UTR | 0.0143 | 2 |
| <u>PRDM1</u>    | <u>NM_001198</u>    | 7 | 3192 | ACAUUCA  | 3186 | 3 UTR | 0.0166 | 2 |
| <u>PRDX3</u>    | <u>NM_006793</u>    | 8 | 2765 | ACAUUCA  | 2758 | 3 UTR | 0.0151 | 2 |
| <u>PRDX5</u>    | <u>NM_012094</u>    | 9 | 4724 | AACAUUCA | 4716 | 3 UTR | 0.0085 | 1 |
| <u>PRKAG2</u>   | <u>NM_016203</u>    | 8 | 4723 | ACAUUCA  | 4716 | 3 UTR | 0.0337 | 2 |
| <u>PRKCA</u>    | <u>NM_002737</u>    | 8 | 3740 | ACAUUCA  | 3733 | 3 UTR | 0.0441 | 2 |
| <u>PRKG1</u>    | <u>NM_001098512</u> | 9 | 5172 | AACAUUCA | 5164 | 3 UTR | 0.0174 | 1 |
| <u>PRM1</u>     | <u>NM_002761</u>    | 8 | 3048 | ACAUUCA  | 3041 | 3 UTR | 0.0346 | 2 |
| <u>PRMT2</u>    | <u>NM_206962</u>    | 7 | 2092 | ACAUUCA  | 2086 | 3 UTR | 0.0331 | 2 |
| <u>PRMT8</u>    | <u>NM_019854</u>    | 8 | 3491 | ACAUUCA  | 3484 | 3 UTR | 0.0420 | 2 |
| <u>PROCR</u>    | <u>NM_006404</u>    | 9 | 4325 | AACAUUCA | 4317 | 3 UTR | 0.0105 | 1 |
| <u>PROM2</u>    | <u>NM_144707</u>    | 8 | 4324 | ACAUUCA  | 4317 | 3 UTR | 0.0415 | 2 |
| <u>PROX1</u>    | <u>NM_002763</u>    | 8 | 3855 | AACAUUCA | 3848 | 3 UTR | 0.0272 | 1 |
| <u>PRPF18</u>   | <u>NM_003675</u>    | 7 | 2665 | AACAUUC  | 2659 | 3 UTR | 0.0363 | 1 |
| <u>PRPF39</u>   | <u>NM_017922</u>    | 7 | 1682 | ACAUUCA  | 1676 | 3 UTR | 0.0430 | 2 |
| <u>PRPF4B</u>   | <u>NM_003913</u>    | 9 | 5279 | AACAUUCA | 5271 | 3 UTR | 0.0022 | 1 |
| <u>PRR6</u>     | <u>NM_181716</u>    | 8 | 5278 | ACAUUCA  | 5271 | 3 UTR | 0.0089 | 2 |
| <u>PRRC1</u>    | <u>NM_130809</u>    | 7 | 2289 | ACAUUCA  | 2283 | 3 UTR | 0.0429 | 2 |
| <u>PRSS16</u>   | <u>NM_005865</u>    | 7 | 963  | AACAUUC  | 957  | 3 UTR | 0.0364 | 1 |
| <u>PRTG</u>     | <u>NM_173814</u>    | 8 | 4948 | AACAUUCA | 4941 | 3 UTR | 0.0395 | 1 |

|                 |                     |    |      |            |      |       |        |   |
|-----------------|---------------------|----|------|------------|------|-------|--------|---|
| <u>PRUNE2</u>   | <u>NM_015225</u>    | 7  | 2373 | ACAUUCA    | 2367 | 3 UTR | 0.0245 | 2 |
| <u>PSG11</u>    | <u>NM_002785</u>    | 7  | 1899 | ACAUUCA    | 1893 | 3 UTR | 0.0219 | 2 |
| <u>PSG2</u>     | <u>NM_031246</u>    | 8  | 3257 | AACAUUCA   | 3250 | 3 UTR | 0.0078 | 1 |
| <u>PSG3</u>     | <u>NM_021016</u>    | 7  | 3256 | ACAUUCA    | 3250 | 3 UTR | 0.0306 | 2 |
| <u>PSG5</u>     | <u>NM_002781</u>    | 8  | 2724 | AACAUUCA   | 2717 | 3 UTR | 0.0235 | 1 |
| <u>PSG9</u>     | <u>NM_002784</u>    | 8  | 2941 | AACAUUCA   | 2934 | 3 UTR | 0.0291 | 1 |
| <u>PSMD13</u>   | <u>NM_175932</u>    | 9  | 2637 | ACAUUCAAC  | 2629 | 3 UTR | 0.0074 | 2 |
| <u>PSMD14</u>   | <u>NM_005805</u>    | 9  | 2540 | AACAUUCA   | 2532 | 3 UTR | 0.0052 | 1 |
| <u>PSORS1C1</u> | <u>NM_014068</u>    | 8  | 2539 | ACAUUCA    | 2532 | 3 UTR | 0.0207 | 2 |
| <u>PSPC1</u>    | <u>NM_001042414</u> | 8  | 4510 | AACAUUCA   | 4503 | 3 UTR | 0.0424 | 1 |
| <u>PSRC1</u>    | <u>NM_001032290</u> | 7  | 3211 | ACAUUCA    | 3205 | 3 UTR | 0.0304 | 2 |
| <u>PTEN</u>     | <u>NM_000314</u>    | 8  | 411  | AACAUUCA   | 404  | 3 UTR | 0.0066 | 1 |
| <u>PTGER3</u>   | <u>NM_198715</u>    | 7  | 410  | ACAUUCA    | 404  | 3 UTR | 0.0260 | 2 |
| <u>PTGES2</u>   | <u>NM_025072</u>    | 8  | 2242 | AACAUUCA   | 2235 | 3 UTR | 0.0029 | 1 |
| <u>PTGS2</u>    | <u>NM_000963</u>    | 7  | 2241 | ACAUUCA    | 2235 | 3 UTR | 0.0117 | 2 |
| <u>PTPDC1</u>   | <u>NM_177995</u>    | 7  | 5887 | ACAUUCA    | 5881 | 3 UTR | 0.0072 | 2 |
| <u>PTPN22</u>   | <u>NM_015967</u>    | 7  | 3287 | ACAUUCA    | 3281 | 3 UTR | 0.0072 | 2 |
| <u>PTPRB</u>    | <u>NM_001109754</u> | 9  | 5270 | AACAUUCA   | 5262 | 3 UTR | 0.0128 | 1 |
| <u>PTPRE</u>    | <u>NM_006504</u>    | 8  | 4598 | ACAUUCA    | 4591 | 3 UTR | 0.0120 | 2 |
| <u>PWP2</u>     | <u>NM_005049</u>    | 10 | 5677 | AACAUUCAAC | 5668 | 3 UTR | 0.0085 | 1 |
| <u>PXMP2</u>    | <u>NM_018663</u>    | 9  | 2671 | AACAUUCA   | 2663 | 3 UTR | 0.0335 | 1 |
| <u>QSOX2</u>    | <u>NM_181701</u>    | 9  | 5676 | ACAUUCAAC  | 5668 | 3 UTR | 0.0335 | 2 |
| <u>RAB20</u>    | <u>NM_017817</u>    | 8  | 3058 | ACAUUCA    | 3051 | 3 UTR | 0.0325 | 2 |
| <u>RAB38</u>    | <u>NM_022337</u>    | 8  | 1196 | AACAUUCA   | 1189 | 3 UTR | 0.0191 | 1 |
| <u>RAB3IP</u>   | <u>NM_175623</u>    | 8  | 6416 | AACAUUCA   | 6409 | 3 UTR | 0.0116 | 1 |
| <u>RAB40B</u>   | <u>NM_006822</u>    | 7  | 6415 | ACAUUCA    | 6409 | 3 UTR | 0.0454 | 2 |
| <u>RABGEF1</u>  | <u>NM_014504</u>    | 8  | 5042 | ACAUUCA    | 5035 | 3 UTR | 0.0257 | 2 |
| <u>RABL3</u>    | <u>NM_173825</u>    | 7  | 1607 | AACAUUC    | 1601 | 3 UTR | 0.0175 | 1 |
| <u>RABL5</u>    | <u>NM_001130821</u> | 8  | 989  | ACAUUCA    | 982  | 3 UTR | 0.0045 | 2 |
| <u>RAD21</u>    | <u>NM_006265</u>    | 7  | 1409 | AACAUUC    | 1403 | 3 UTR | 0.0331 | 1 |
| <u>RAD23B</u>   | <u>NM_002874</u>    | 8  | 3136 | ACAUUCA    | 3129 | 3 UTR | 0.0204 | 2 |
| <u>RANBP5</u>   | <u>NM_002271</u>    | 9  | 1492 | AACAUUCA   | 1484 | 3 UTR | 0.0016 | 1 |
| <u>RASAL2</u>   | <u>NM_170692</u>    | 8  | 1491 | ACAUUCA    | 1484 | 3 UTR | 0.0063 | 2 |
| <u>RASIP1</u>   | <u>NM_017805</u>    | 8  | 5172 | ACAUUCA    | 5165 | 3 UTR | 0.0430 | 2 |
| <u>RASSF2</u>   | <u>NM_014737</u>    | 9  | 2509 | AACAUUCA   | 2501 | 3 UTR | 0.0117 | 1 |
| <u>RASSF6</u>   | <u>NM_201431</u>    | 8  | 4860 | ACAUUCA    | 4853 | 3 UTR | 0.0458 | 2 |
| <u>RBBP7</u>    | <u>NM_002893</u>    | 8  | 2508 | ACAUUCA    | 2501 | 3 UTR | 0.0458 | 2 |
| <u>RBM14</u>    | <u>NM_006328</u>    | 8  | 670  | AACAUUCA   | 663  | 3 UTR | 0.0103 | 1 |
| <u>RBM26</u>    | <u>NM_022118</u>    | 7  | 669  | ACAUUCA    | 663  | 3 UTR | 0.0405 | 2 |
| <u>RBM27</u>    | <u>NM_018989</u>    | 8  | 2097 | ACAUUCA    | 2090 | 3 UTR | 0.0304 | 2 |
| <u>RBM35A</u>   | <u>NM_017697</u>    | 8  | 1366 | AACAUUCA   | 1359 | 3 UTR | 0.0091 | 1 |

|                     |                     |   |       |           |       |       |        |   |
|---------------------|---------------------|---|-------|-----------|-------|-------|--------|---|
| <u>RCBTB2</u>       | <u>NM_001268</u>    | 7 | 1365  | ACAUUCA   | 1359  | 3 UTR | 0.0361 | 2 |
| <u>RDH12</u>        | <u>NM_152443</u>    | 8 | 656   | AACAUUCA  | 649   | 3 UTR | 0.0046 | 1 |
| <u>REC8</u>         | <u>NM_001048205</u> | 7 | 655   | ACAUUCA   | 649   | 3 UTR | 0.0183 | 2 |
| <u>RECK</u>         | <u>NM_021111</u>    | 8 | 2493  | AACAUUCA  | 2486  | 3 UTR | 0.0229 | 1 |
| <u>RECQL</u>        | <u>NM_002907</u>    | 8 | 1710  | ACAUUCA   | 1703  | 3 UTR | 0.0130 | 2 |
| <u>REEP1</u>        | <u>NM_022912</u>    | 7 | 1451  | AACAUUC   | 1445  | 3 UTR | 0.0130 | 1 |
| <u>REEP5</u>        | <u>NM_005669</u>    | 8 | 1473  | ACAUUCA   | 1466  | 3 UTR | 0.0343 | 2 |
| <u>REG4</u>         | <u>NM_032044</u>    | 8 | 1801  | ACAUUCA   | 1794  | 3 UTR | 0.0205 | 2 |
| <u>RERE</u>         | <u>NM_012102</u>    | 9 | 3811  | AACAUUCA  | 3803  | 3 UTR | 0.0079 | 1 |
| <u>RFC3</u>         | <u>NM_002915</u>    | 8 | 3810  | ACAUUCA   | 3803  | 3 UTR | 0.0311 | 2 |
| <u>RFK</u>          | <u>NM_018339</u>    | 9 | 3068  | AACAUUCA  | 3060  | 3 UTR | 0.0097 | 1 |
| <u>RG9MTD1</u>      | <u>NM_017819</u>    | 8 | 3067  | ACAUUCA   | 3060  | 3 UTR | 0.0384 | 2 |
| <u>RGS13</u>        | <u>NM_002927</u>    | 9 | 2646  | AACAUUCA  | 2638  | 3 UTR | 0.0023 | 1 |
| <u>RGS18</u>        | <u>NM_130782</u>    | 8 | 2645  | ACAUUCA   | 2638  | 3 UTR | 0.0091 | 2 |
| <u>RGS22</u>        | <u>NM_015668</u>    | 8 | 4918  | ACAUUCA   | 4911  | 3 UTR | 0.0380 | 2 |
| <u>RHOG</u>         | <u>NM_001665</u>    | 9 | 3847  | AACAUUCA  | 3839  | 3 UTR | 0.0105 | 1 |
| <u>RIOK2</u>        | <u>NM_018343</u>    | 9 | 3798  | AACAUUCA  | 3790  | 3 UTR | 0.0105 | 1 |
| <u>RLBP1L1</u>      | <u>NM_173519</u>    | 9 | 4696  | ACAUUCAAC | 4688  | 3 UTR | 0.0105 | 2 |
| <u>RLF</u>          | <u>NM_012421</u>    | 8 | 3846  | ACAUUCA   | 3839  | 3 UTR | 0.0414 | 2 |
| <u>RNASE4</u>       | <u>NM_002937</u>    | 8 | 3797  | ACAUUCA   | 3790  | 3 UTR | 0.0414 | 2 |
| <u>RNF125</u>       | <u>NM_017831</u>    | 8 | 3408  | ACAUUCA   | 3401  | 3 UTR | 0.0414 | 2 |
| <u>RNF13</u>        | <u>NM_007282</u>    | 8 | 4316  | AACAUUCA  | 4309  | 3 UTR | 0.0233 | 1 |
| <u>RNF141</u>       | <u>NM_016422</u>    | 9 | 4156  | AACAUUCA  | 4148  | 3 UTR | 0.0115 | 1 |
| <u>RNF146</u>       | <u>NM_030963</u>    | 8 | 4155  | ACAUUCA   | 4148  | 3 UTR | 0.0453 | 2 |
| <u>RNF182</u>       | <u>NM_152737</u>    | 8 | 2123  | ACAUUCA   | 2116  | 3 UTR | 0.0475 | 2 |
| <u>RNF34</u>        | <u>NM_194271</u>    | 9 | 1273  | AACAUUCA  | 1265  | 3 UTR | 0.0014 | 1 |
| <u>RNF38</u>        | <u>NM_194328</u>    | 8 | 1272  | ACAUUCA   | 1265  | 3 UTR | 0.0057 | 2 |
| <u>RNF6</u>         | <u>NM_005977</u>    | 8 | 1727  | AACAUUCA  | 1720  | 3 UTR | 0.0212 | 1 |
| <u>RNF8</u>         | <u>NM_003958</u>    | 8 | 1649  | AACAUUCA  | 1642  | 3 UTR | 0.0173 | 1 |
| <u>RNMT</u>         | <u>NM_003799</u>    | 8 | 2217  | ACAUUCA   | 2210  | 3 UTR | 0.0173 | 2 |
| <u>ROD1</u>         | <u>NM_005156</u>    | 8 | 2349  | AACAUUCA  | 2342  | 3 UTR | 0.0190 | 1 |
| <u>RP2</u>          | <u>NM_006915</u>    | 7 | 2810  | AACAUUC   | 2804  | 3 UTR | 0.0281 | 1 |
| <u>RP5-1022P6.2</u> | <u>NM_019593</u>    | 8 | 2961  | ACAUUCA   | 2954  | 3 UTR | 0.0295 | 2 |
| <u>RPAP2</u>        | <u>NM_024813</u>    | 9 | 3334  | ACAUUCAAC | 3326  | 3 UTR | 0.0096 | 2 |
| <u>RPAP3</u>        | <u>NM_024604</u>    | 8 | 3622  | ACAUUCA   | 3615  | 3 UTR | 0.0049 | 2 |
| <u>RPE65</u>        | <u>NM_000329</u>    | 8 | 7033  | AACAUUCA  | 7026  | 3 UTR | 0.0240 | 1 |
| <u>RPL15</u>        | <u>NM_002948</u>    | 7 | 1050  | AACAUUC   | 1044  | 3 UTR | 0.0204 | 1 |
| <u>RPN2</u>         | <u>NM_002951</u>    | 8 | 11859 | AACAUUCA  | 11852 | 3 UTR | 0.0143 | 1 |
| <u>RPS6KA3</u>      | <u>NM_004586</u>    | 7 | 6690  | AACAUUC   | 6684  | 3 UTR | 0.0188 | 1 |
| <u>RPS6KC1</u>      | <u>NM_012424</u>    | 8 | 7334  | ACAUUCA   | 7327  | 3 UTR | 0.0216 | 2 |
| <u>RRAGA</u>        | <u>NM_006570</u>    | 9 | 2980  | AACAUUCA  | 2972  | 3 UTR | 0.0093 | 1 |

|                 |                     |   |      |          |      |       |        |   |
|-----------------|---------------------|---|------|----------|------|-------|--------|---|
| <u>RRAGD</u>    | <u>NM_021244</u>    | 8 | 2979 | ACAUUCA  | 2972 | 3 UTR | 0.0365 | 2 |
| <u>RSPO2</u>    | <u>NM_178565</u>    | 7 | 1911 | AACAUUC  | 1905 | 3 UTR | 0.0488 | 1 |
| <u>RTN1</u>     | <u>NM_021136</u>    | 8 | 3852 | AACAUUCA | 3845 | 3 UTR | 0.0220 | 1 |
| <u>RUFY2</u>    | <u>NM_017987</u>    | 8 | 4301 | AACAUUCA | 4294 | 3 UTR | 0.0328 | 1 |
| <u>RUSC1</u>    | <u>NM_001105203</u> | 7 | 2657 | AACAUUC  | 2651 | 3 UTR | 0.0276 | 1 |
| <u>RWDD2B</u>   | <u>NM_016940</u>    | 8 | 4876 | ACAUUCA  | 4869 | 3 UTR | 0.0241 | 2 |
| <u>RYR3</u>     | <u>NM_001036</u>    | 8 | 3904 | AACAUUCA | 3897 | 3 UTR | 0.0352 | 1 |
| <u>S100Z</u>    | <u>NM_130772</u>    | 8 | 940  | AACAUUCA | 933  | 3 UTR | 0.0004 | 1 |
| <u>SACS</u>     | <u>NM_014363</u>    | 7 | 939  | ACAUUCA  | 933  | 3 UTR | 0.0014 | 2 |
| <u>SAMHD1</u>   | <u>NM_015474</u>    | 7 | 374  | AACAUUC  | 368  | 3 UTR | 0.0051 | 1 |
| <u>SCAPER</u>   | <u>NM_020843</u>    | 9 | 7926 | AACAUUCA | 7918 | 3 UTR | 0.0218 | 1 |
| <u>SCG5</u>     | <u>NM_003020</u>    | 7 | 4091 | ACAUUCA  | 4085 | 3 UTR | 0.0177 | 2 |
| <u>SCHIP1</u>   | <u>NM_014575</u>    | 7 | 2693 | AACAUUC  | 2687 | 3 UTR | 0.0390 | 1 |
| <u>SCOC</u>     | <u>NM_032547</u>    | 8 | 5378 | AACAUUCA | 5371 | 3 UTR | 0.0379 | 1 |
| <u>SDF2L1</u>   | <u>NM_022044</u>    | 9 | 6729 | AACAUUCA | 6721 | 3 UTR | 0.0312 | 1 |
| <u>SEC16B</u>   | <u>NM_033127</u>    | 7 | 1791 | ACAUUCA  | 1785 | 3 UTR | 0.0462 | 2 |
| <u>SEC24B</u>   | <u>NM_006323</u>    | 8 | 9756 | AACAUUCA | 9749 | 3 UTR | 0.0270 | 1 |
| <u>SECISBP2</u> | <u>NM_024077</u>    | 8 | 6086 | ACAUUCA  | 6079 | 3 UTR | 0.0415 | 2 |
| <u>SELK</u>     | <u>NM_021237</u>    | 8 | 3012 | ACAUUCA  | 3005 | 3 UTR | 0.0265 | 2 |
| <u>SELT</u>     | <u>NM_016275</u>    | 7 | 2495 | ACAUUCA  | 2489 | 3 UTR | 0.0389 | 2 |
| <u>SEMA3B</u>   | <u>NM_004636</u>    | 7 | 823  | AACAUUC  | 817  | 3 UTR | 0.0335 | 1 |
| <u>SEMA3C</u>   | <u>NM_006379</u>    | 9 | 2758 | AACAUUCA | 2750 | 3 UTR | 0.0130 | 1 |
| <u>SEMA4C</u>   | <u>NM_017789</u>    | 8 | 3078 | AACAUUCA | 3071 | 3 UTR | 0.0264 | 1 |
| <u>SENPI</u>    | <u>NM_014554</u>    | 7 | 3871 | ACAUUCA  | 3865 | 3 UTR | 0.0298 | 2 |
| <u>SERPINB9</u> | <u>NM_004155</u>    | 7 | 2269 | ACAUUCA  | 2263 | 3 UTR | 0.0424 | 2 |
| <u>SERPINI1</u> | <u>NM_005025</u>    | 9 | 3660 | AACAUUCA | 3652 | 3 UTR | 0.0097 | 1 |
| <u>SETX</u>     | <u>NM_015046</u>    | 8 | 3659 | ACAUUCA  | 3652 | 3 UTR | 0.0383 | 2 |
| <u>SF1</u>      | <u>NM_004630</u>    | 7 | 4192 | AACAUUC  | 4186 | 3 UTR | 0.0263 | 1 |
| <u>SF3B3</u>    | <u>NM_012426</u>    | 7 | 6283 | ACAUUCA  | 6277 | 3 UTR | 0.0366 | 2 |
| <u>SF4</u>      | <u>NM_172231</u>    | 8 | 2147 | ACAUUCA  | 2140 | 3 UTR | 0.0312 | 2 |
| <u>SFRP5</u>    | <u>NM_003015</u>    | 9 | 5067 | AACAUUCA | 5059 | 3 UTR | 0.0060 | 1 |
| <u>SFRS1</u>    | <u>NM_001078166</u> | 8 | 5066 | ACAUUCA  | 5059 | 3 UTR | 0.0238 | 2 |
| <u>SFRS18</u>   | <u>NM_032870</u>    | 7 | 1763 | AACAUUC  | 1757 | 3 UTR | 0.0163 | 1 |
| <u>SFRS5</u>    | <u>NM_001039465</u> | 7 | 1265 | AACAUUC  | 1259 | 3 UTR | 0.0201 | 1 |
| <u>SFT2D1</u>   | <u>NM_145169</u>    | 8 | 1627 | AACAUUCA | 1620 | 3 UTR | 0.0161 | 1 |
| <u>SFT2D2</u>   | <u>NM_199344</u>    | 9 | 5788 | AACAUUCA | 5780 | 3 UTR | 0.0157 | 1 |
| <u>SGK2</u>     | <u>NM_016276</u>    | 9 | 2265 | AACAUUCA | 2257 | 3 UTR | 0.0157 | 1 |
| <u>SGK269</u>   | <u>NM_024776</u>    | 8 | 2326 | AACAUUCA | 2319 | 3 UTR | 0.0351 | 1 |
| <u>SGK3</u>     | <u>NM_001033578</u> | 9 | 5589 | AACAUUCA | 5581 | 3 UTR | 0.0150 | 1 |
| <u>SGOL2</u>    | <u>NM_152524</u>    | 8 | 5079 | ACAUUCA  | 5072 | 3 UTR | 0.0451 | 2 |
| <u>SH2D3C</u>   | <u>NM_170600</u>    | 9 | 1823 | ACAUUCA  | 1815 | 3 UTR | 0.0011 | 2 |

|                 |                     |    |      |             |      |       |        |   |
|-----------------|---------------------|----|------|-------------|------|-------|--------|---|
| <u>SHQ1</u>     | <u>NM_018130</u>    | 10 | 4391 | AACAUUCAAC  | 4382 | 3 UTR | 0.0035 | 1 |
| <u>SIAE</u>     | <u>NM_170601</u>    | 9  | 4390 | ACAUUCAAC   | 4382 | 3 UTR | 0.0138 | 2 |
| <u>SIN3B</u>    | <u>NM_015260</u>    | 8  | 2705 | AACAUUCA    | 2698 | 3 UTR | 0.0248 | 1 |
| <u>SIRT1</u>    | <u>NM_012238</u>    | 9  | 4633 | AACAUUCA    | 4625 | 3 UTR | 0.0468 | 1 |
| <u>SIX2</u>     | <u>NM_016932</u>    | 7  | 3050 | ACAUUCA     | 3044 | 3 UTR | 0.0368 | 2 |
| <u>SKP1</u>     | <u>NM_006930</u>    | 8  | 3596 | ACAUUCA     | 3589 | 3 UTR | 0.0160 | 2 |
| <u>SLAIN2</u>   | <u>NM_020846</u>    | 8  | 1023 | AACAUUCA    | 1016 | 3 UTR | 0.0094 | 1 |
| <u>SLC10A7</u>  | <u>NM_001029998</u> | 8  | 748  | ACAUUCA     | 741  | 3 UTR | 0.0094 | 2 |
| <u>SLC11A1</u>  | <u>NM_000578</u>    | 7  | 1311 | ACAUUCA     | 1305 | 3 UTR | 0.0190 | 2 |
| <u>SLC12A5</u>  | <u>NM_020708</u>    | 7  | 1000 | AACAUUC     | 994  | 3 UTR | 0.0169 | 1 |
| <u>SLC19A2</u>  | <u>NM_006996</u>    | 9  | 2092 | AACAUUCA    | 2084 | 3 UTR | 0.0074 | 1 |
| <u>SLC22A15</u> | <u>NM_018420</u>    | 8  | 2091 | ACAUUCA     | 2084 | 3 UTR | 0.0294 | 2 |
| <u>SLC22A2</u>  | <u>NM_003058</u>    | 9  | 3067 | AACAUUCA    | 3059 | 3 UTR | 0.0127 | 1 |
| <u>SLC24A3</u>  | <u>NM_020689</u>    | 8  | 3066 | ACAUUCA     | 3059 | 3 UTR | 0.0499 | 2 |
| <u>SLC25A21</u> | <u>NM_030631</u>    | 7  | 2800 | AACAUUC     | 2794 | 3 UTR | 0.0317 | 1 |
| <u>SLC25A24</u> | <u>NM_013386</u>    | 7  | 1731 | ACAUUCA     | 1725 | 3 UTR | 0.0143 | 2 |
| <u>SLC25A36</u> | <u>NM_001104647</u> | 7  | 1701 | AACAUUC     | 1695 | 3 UTR | 0.0160 | 1 |
| <u>SLC25A37</u> | <u>NM_016612</u>    | 9  | 2680 | AACAUUCA    | 2672 | 3 UTR | 0.0091 | 1 |
| <u>SLC25A38</u> | <u>NM_017875</u>    | 8  | 2679 | ACAUUCA     | 2672 | 3 UTR | 0.0360 | 2 |
| <u>SLC25A4</u>  | <u>NM_001151</u>    | 8  | 2724 | ACAUUCA     | 2717 | 3 UTR | 0.0240 | 2 |
| <u>SLC25A40</u> | <u>NM_018843</u>    | 9  | 3909 | AACAUUCA    | 3901 | 3 UTR | 0.0088 | 1 |
| <u>SLC26A9</u>  | <u>NM_052934</u>    | 8  | 3908 | ACAUUCA     | 3901 | 3 UTR | 0.0349 | 2 |
| <u>SLC2A1</u>   | <u>NM_006516</u>    | 9  | 3333 | AACAUUCA    | 3325 | 3 UTR | 0.0139 | 1 |
| <u>SLC35C2</u>  | <u>NM_173179</u>    | 9  | 6690 | ACAUUCAAC   | 6682 | 3 UTR | 0.0139 | 2 |
| <u>SLC38A10</u> | <u>NM_001037984</u> | 9  | 5476 | AACAUUCA    | 5468 | 3 UTR | 0.0156 | 1 |
| <u>SLC38A2</u>  | <u>NM_018976</u>    | 8  | 1374 | ACAUUCA     | 1367 | 3 UTR | 0.0449 | 2 |
| <u>SLC39A10</u> | <u>NM_001127257</u> | 8  | 1937 | ACAUUCA     | 1930 | 3 UTR | 0.0155 | 2 |
| <u>SLC39A12</u> | <u>NM_152725</u>    | 8  | 2286 | AACAUUCA    | 2279 | 3 UTR | 0.0063 | 1 |
| <u>SLC39A14</u> | <u>NM_001128431</u> | 7  | 2285 | ACAUUCA     | 2279 | 3 UTR | 0.0251 | 2 |
| <u>SLC3A1</u>   | <u>NM_000341</u>    | 7  | 2415 | ACAUUCA     | 2409 | 3 UTR | 0.0468 | 2 |
| <u>SLC5A8</u>   | <u>NM_145913</u>    | 9  | 3776 | AACAUUCA    | 3768 | 3 UTR | 0.0135 | 1 |
| <u>SLC5A9</u>   | <u>NM_001011547</u> | 8  | 2069 | AACAUUCA    | 2062 | 3 UTR | 0.0280 | 1 |
| <u>SLC7A1</u>   | <u>NM_003045</u>    | 7  | 898  | AACAUUC     | 892  | 3 UTR | 0.0241 | 1 |
| <u>SLC7A6OS</u> | <u>NM_032178</u>    | 9  | 5698 | AACAUUCA    | 5690 | 3 UTR | 0.0328 | 1 |
| <u>SLC9A3R1</u> | <u>NM_004252</u>    | 7  | 2737 | ACAUUCA     | 2731 | 3 UTR | 0.0492 | 2 |
| <u>SLCO3A1</u>  | <u>NM_013272</u>    | 8  | 3415 | AACAUUCA    | 3408 | 3 UTR | 0.0420 | 1 |
| <u>SLFN11</u>   | <u>NM_001104587</u> | 7  | 2084 | ACAUUCA     | 2078 | 3 UTR | 0.0337 | 2 |
| <u>SLMAP</u>    | <u>NM_007159</u>    | 8  | 1538 | AACAUUCA    | 1531 | 3 UTR | 0.0293 | 1 |
| <u>SLN</u>      | <u>NM_003063</u>    | 8  | 3117 | ACAUUCA     | 3110 | 3 UTR | 0.0423 | 2 |
| <u>SMAD7</u>    | <u>NM_005904</u>    | 11 | 5833 | AACAUUCAACG | 5823 | 3 UTR | 0.0014 | 1 |
| <u>SMC6</u>     | <u>NM_024624</u>    | 10 | 5832 | ACAUUCAACG  | 5823 | 3 UTR | 0.0057 | 2 |



|                   |                     |    |      |            |      |       |        |   |
|-------------------|---------------------|----|------|------------|------|-------|--------|---|
| <u>SNAP25</u>     | <u>NM_003081</u>    | 9  | 1380 | AACAUUCA   | 1372 | 3 UTR | 0.0124 | 1 |
| <u>SNAPC3</u>     | <u>NM_001039697</u> | 8  | 1379 | ACAUUCA    | 1372 | 3 UTR | 0.0486 | 2 |
| <u>SNIP</u>       | <u>NM_025248</u>    | 8  | 3537 | ACAUUCA    | 3530 | 3 UTR | 0.0382 | 2 |
| <u>SNN</u>        | <u>NM_003498</u>    | 10 | 2242 | AACAUUCAAC | 2233 | 3 UTR | 0.0024 | 1 |
| <u>SNX1</u>       | <u>NM_003099</u>    | 9  | 2235 | AACAUUCA   | 2227 | 3 UTR | 0.0096 | 1 |
| <u>SNX13</u>      | <u>NM_015132</u>    | 9  | 2241 | ACAUUCAAC  | 2233 | 3 UTR | 0.0096 | 2 |
| <u>SOAT2</u>      | <u>NM_003578</u>    | 8  | 2234 | ACAUUCA    | 2227 | 3 UTR | 0.0380 | 2 |
| <u>SOBP</u>       | <u>NM_018013</u>    | 8  | 1785 | AACAUUCA   | 1778 | 3 UTR | 0.0019 | 1 |
| <u>SOCS4</u>      | <u>NM_199421</u>    | 7  | 1784 | ACAUUCA    | 1778 | 3 UTR | 0.0075 | 2 |
| <u>SOD3</u>       | <u>NM_003102</u>    | 9  | 1361 | AACAUUCA   | 1353 | 3 UTR | 0.0025 | 1 |
| <u>SORBS2</u>     | <u>NM_021069</u>    | 8  | 1360 | ACAUUCA    | 1353 | 3 UTR | 0.0100 | 2 |
| <u>SOX17</u>      | <u>NM_022454</u>    | 8  | 2475 | ACAUUCA    | 2468 | 3 UTR | 0.0304 | 2 |
| <u>SOX6</u>       | <u>NM_017508</u>    | 9  | 7408 | AACAUUCA   | 7400 | 3 UTR | 0.0104 | 1 |
| <u>SPAG1</u>      | <u>NM_003114</u>    | 8  | 7407 | ACAUUCA    | 7400 | 3 UTR | 0.0408 | 2 |
| <u>SPATA1</u>     | <u>NM_001081472</u> | 9  | 2562 | AACAUUCA   | 2554 | 3 UTR | 0.0057 | 1 |
| <u>SPECC1L</u>    | <u>NM_015330</u>    | 8  | 2561 | ACAUUCA    | 2554 | 3 UTR | 0.0225 | 2 |
| <u>SPG21</u>      | <u>NM_016630</u>    | 8  | 3318 | AACAUUCA   | 3311 | 3 UTR | 0.0283 | 1 |
| <u>SPIRE1</u>     | <u>NM_001128626</u> | 7  | 1646 | AACAUUC    | 1640 | 3 UTR | 0.0233 | 1 |
| <u>SPOCK3</u>     | <u>NM_016950</u>    | 9  | 6846 | AACAUUCA   | 6838 | 3 UTR | 0.0162 | 1 |
| <u>SPP1</u>       | <u>NM_001040058</u> | 9  | 8433 | AACAUUCA   | 8425 | 3 UTR | 0.0163 | 1 |
| <u>SPSB1</u>      | <u>NM_025106</u>    | 9  | 6708 | AACAUUCA   | 6700 | 3 UTR | 0.0163 | 1 |
| <u>SPTLC1</u>     | <u>NM_006415</u>    | 8  | 6647 | AACAUUCA   | 6640 | 3 UTR | 0.0115 | 1 |
| <u>SPTLC3</u>     | <u>NM_018327</u>    | 7  | 6646 | ACAUUCA    | 6640 | 3 UTR | 0.0452 | 2 |
| <u>SREBF2</u>     | <u>NM_004599</u>    | 10 | 8384 | AACAUUCAAC | 8375 | 3 UTR | 0.0044 | 1 |
| <u>SRF</u>        | <u>NM_003131</u>    | 9  | 6730 | AACAUUCA   | 6722 | 3 UTR | 0.0176 | 1 |
| <u>SRPK2</u>      | <u>NM_182691</u>    | 9  | 8383 | ACAUUCAAC  | 8375 | 3 UTR | 0.0176 | 2 |
| <u>SS18L1</u>     | <u>NM_198935</u>    | 8  | 4329 | AACAUUCA   | 4322 | 3 UTR | 0.0361 | 1 |
| <u>SS18L2</u>     | <u>NM_016305</u>    | 9  | 4376 | ACAUUCAAC  | 4368 | 3 UTR | 0.0091 | 2 |
| <u>SSB</u>        | <u>NM_003142</u>    | 8  | 4435 | AACAUUCA   | 4428 | 3 UTR | 0.0361 | 1 |
| <u>SSH2</u>       | <u>NM_033389</u>    | 9  | 4482 | ACAUUCAAC  | 4474 | 3 UTR | 0.0091 | 2 |
| <u>ST6GALNAC3</u> | <u>NM_152996</u>    | 8  | 4293 | AACAUUCA   | 4286 | 3 UTR | 0.0361 | 1 |
| <u>ST6GALNAC5</u> | <u>NM_030965</u>    | 9  | 4340 | ACAUUCAAC  | 4332 | 3 UTR | 0.0091 | 2 |
| <u>STAC3</u>      | <u>NM_145064</u>    | 8  | 4362 | AACAUUCA   | 4355 | 3 UTR | 0.0361 | 1 |
| <u>STAMBPL1</u>   | <u>NM_020799</u>    | 9  | 4409 | ACAUUCAAC  | 4401 | 3 UTR | 0.0091 | 2 |
| <u>STAT5A</u>     | <u>NM_003152</u>    | 9  | 5967 | AACAUUCA   | 5959 | 3 UTR | 0.0119 | 1 |
| <u>STCH</u>       | <u>NM_006948</u>    | 8  | 5966 | ACAUUCA    | 5959 | 3 UTR | 0.0467 | 2 |
| <u>STEAP4</u>     | <u>NM_024636</u>    | 8  | 4550 | AACAUUCA   | 4543 | 3 UTR | 0.0361 | 1 |
| <u>STK17B</u>     | <u>NM_004226</u>    | 9  | 4597 | ACAUUCAAC  | 4589 | 3 UTR | 0.0091 | 2 |
| <u>STK25</u>      | <u>NM_006374</u>    | 8  | 4746 | AACAUUCA   | 4739 | 3 UTR | 0.0363 | 1 |
| <u>STK32C</u>     | <u>NM_173575</u>    | 9  | 4793 | ACAUUCAAC  | 4785 | 3 UTR | 0.0092 | 2 |
| <u>STX12</u>      | <u>NM_177424</u>    | 8  | 2583 | AACAUUCA   | 2576 | 3 UTR | 0.0119 | 1 |

|                 |                     |   |      |           |      |       |        |   |
|-----------------|---------------------|---|------|-----------|------|-------|--------|---|
| <u>STXBP4</u>   | <u>NM_178509</u>    | 7 | 2582 | ACAUUCA   | 2576 | 3 UTR | 0.0466 | 2 |
| <u>SUCLG2</u>   | <u>NM_003848</u>    | 8 | 3025 | AACAUUCA  | 3018 | 3 UTR | 0.0098 | 1 |
| <u>SUMO3</u>    | <u>NM_006936</u>    | 7 | 3024 | ACAUUCA   | 3018 | 3 UTR | 0.0386 | 2 |
| <u>SUSD5</u>    | <u>NM_015551</u>    | 9 | 1818 | ACAUUCAAC | 1810 | 3 UTR | 0.0051 | 2 |
| <u>SYN2</u>     | <u>NM_003178</u>    | 8 | 1520 | ACAUUCA   | 1513 | 3 UTR | 0.0072 | 2 |
| <u>SYNE1</u>    | <u>NM_182961</u>    | 8 | 1262 | ACAUUCA   | 1255 | 3 UTR | 0.0255 | 2 |
| <u>SYNPR</u>    | <u>NM_144642</u>    | 9 | 4631 | AACAUUCA  | 4623 | 3 UTR | 0.0098 | 1 |
| <u>SYT15</u>    | <u>NM_031912</u>    | 8 | 3489 | AACAUUCA  | 3482 | 3 UTR | 0.0387 | 1 |
| <u>SYT16</u>    | <u>NM_031914</u>    | 8 | 4630 | ACAUUCA   | 4623 | 3 UTR | 0.0387 | 2 |
| <u>TACC2</u>    | <u>NM_206862</u>    | 9 | 921  | AACAUUCA  | 913  | 3 UTR | 0.0065 | 1 |
| <u>TADAIL</u>   | <u>NM_053053</u>    | 8 | 920  | ACAUUCA   | 913  | 3 UTR | 0.0258 | 2 |
| <u>TAF15</u>    | <u>NM_003487</u>    | 7 | 1127 | AACAUUC   | 1121 | 3 UTR | 0.0286 | 1 |
| <u>TAF1A</u>    | <u>NM_005681</u>    | 9 | 8676 | AACAUUCA  | 8668 | 3 UTR | 0.0232 | 1 |
| <u>TAF9</u>     | <u>NM_001015892</u> | 9 | 4141 | AACAUUCA  | 4133 | 3 UTR | 0.0044 | 1 |
| <u>TAF9B</u>    | <u>NM_015975</u>    | 8 | 4140 | ACAUUCA   | 4133 | 3 UTR | 0.0175 | 2 |
| <u>TAGLN3</u>   | <u>NM_013259</u>    | 8 | 6371 | ACAUUCA   | 6364 | 3 UTR | 0.0444 | 2 |
| <u>TAPT1</u>    | <u>NM_153365</u>    | 9 | 1756 | AACAUUCA  | 1748 | 3 UTR | 0.0034 | 1 |
| <u>TBC1D1</u>   | <u>NM_015173</u>    | 8 | 1755 | ACAUUCA   | 1748 | 3 UTR | 0.0134 | 2 |
| <u>TBC1D14</u>  | <u>NM_020773</u>    | 9 | 3974 | AACAUUCA  | 3966 | 3 UTR | 0.0055 | 1 |
| <u>TBC1D15</u>  | <u>NM_022771</u>    | 8 | 3973 | ACAUUCA   | 3966 | 3 UTR | 0.0217 | 2 |
| <u>TBC1D9</u>   | <u>NM_015130</u>    | 9 | 1035 | AACAUUCA  | 1027 | 3 UTR | 0.0027 | 1 |
| <u>TBCD</u>     | <u>NM_005993</u>    | 8 | 1034 | ACAUUCA   | 1027 | 3 UTR | 0.0109 | 2 |
| <u>TBPL1</u>    | <u>NM_004865</u>    | 8 | 1437 | AACAUUCA  | 1430 | 3 UTR | 0.0121 | 1 |
| <u>TBXA2R</u>   | <u>NM_001060</u>    | 7 | 1436 | ACAUUCA   | 1430 | 3 UTR | 0.0475 | 2 |
| <u>TCERG1</u>   | <u>NM_006706</u>    | 9 | 1105 | ACAUUCAAC | 1097 | 3 UTR | 0.0029 | 2 |
| <u>TCF7L2</u>   | <u>NM_030756</u>    | 9 | 7629 | AACAUUCA  | 7621 | 3 UTR | 0.0047 | 1 |
| <u>TCTN3</u>    | <u>NM_015631</u>    | 8 | 7628 | ACAUUCA   | 7621 | 3 UTR | 0.0187 | 2 |
| <u>TDRD3</u>    | <u>NM_030794</u>    | 8 | 5937 | AACAUUCA  | 5930 | 3 UTR | 0.0350 | 1 |
| <u>TEX2</u>     | <u>NM_018469</u>    | 9 | 3886 | AACAUUCA  | 3878 | 3 UTR | 0.0092 | 1 |
| <u>TFPI</u>     | <u>NM_006287</u>    | 8 | 3885 | ACAUUCA   | 3878 | 3 UTR | 0.0363 | 2 |
| <u>TFRC</u>     | <u>NM_003234</u>    | 8 | 2627 | AACAUUCA  | 2620 | 3 UTR | 0.0189 | 1 |
| <u>TGFBI</u>    | <u>NM_000358</u>    | 9 | 701  | AACAUUCA  | 693  | 3 UTR | 0.0014 | 1 |
| <u>TGFBR2</u>   | <u>NM_001024847</u> | 8 | 700  | ACAUUCA   | 693  | 3 UTR | 0.0055 | 2 |
| <u>TGFBRAP1</u> | <u>NM_004257</u>    | 7 | 2996 | AACAUUC   | 2990 | 3 UTR | 0.0171 | 1 |
| <u>TGIF2</u>    | <u>NM_021809</u>    | 8 | 3925 | AACAUUCA  | 3918 | 3 UTR | 0.0431 | 1 |
| <u>THOC7</u>    | <u>NM_025075</u>    | 7 | 6502 | ACAUUCA   | 6496 | 3 UTR | 0.0477 | 2 |
| <u>THSD7B</u>   | <u>NM_001080427</u> | 8 | 9204 | AACAUUCA  | 9197 | 3 UTR | 0.0022 | 1 |
| <u>TIA1</u>     | <u>NM_022173</u>    | 7 | 6256 | AACAUUC   | 6250 | 3 UTR | 0.0089 | 1 |
| <u>TIFA</u>     | <u>NM_052864</u>    | 7 | 5799 | AACAUUC   | 5793 | 3 UTR | 0.0089 | 1 |
| <u>TIMELESS</u> | <u>NM_003920</u>    | 7 | 9203 | ACAUUCA   | 9197 | 3 UTR | 0.0089 | 2 |
| <u>TIMM17A</u>  | <u>NM_006335</u>    | 9 | 7016 | AACAUUCA  | 7008 | 3 UTR | 0.0149 | 1 |

|                  |                     |    |      |            |      |       |        |   |
|------------------|---------------------|----|------|------------|------|-------|--------|---|
| <u>TM2D3</u>     | <u>NM_078474</u>    | 9  | 5434 | AACAUUCA   | 5426 | 3 UTR | 0.0149 | 1 |
| <u>TM7SF3</u>    | <u>NM_016551</u>    | 10 | 2597 | AACAUUCAAC | 2588 | 3 UTR | 0.0016 | 1 |
| <u>TMCO3</u>     | <u>NM_017905</u>    | 9  | 2596 | ACAUUCAAC  | 2588 | 3 UTR | 0.0066 | 2 |
| <u>TMEM106B</u>  | <u>NM_018374</u>    | 8  | 3580 | ACAUUCA    | 3573 | 3 UTR | 0.0402 | 2 |
| <u>TMEM108</u>   | <u>NM_023943</u>    | 8  | 1715 | ACAUUCA    | 1708 | 3 UTR | 0.0286 | 2 |
| <u>TMEM123</u>   | <u>NM_052932</u>    | 8  | 2901 | AACAUUCA   | 2894 | 3 UTR | 0.0140 | 1 |
| <u>TMEM127</u>   | <u>NM_017849</u>    | 9  | 1095 | AACAUUCA   | 1087 | 3 UTR | 0.0007 | 1 |
| <u>TMEM131</u>   | <u>NM_015348</u>    | 8  | 1094 | ACAUUCA    | 1087 | 3 UTR | 0.0026 | 2 |
| <u>TMEM144</u>   | <u>NM_018342</u>    | 8  | 5140 | AACAUUCA   | 5133 | 3 UTR | 0.0473 | 1 |
| <u>TMEM14A</u>   | <u>NM_014051</u>    | 8  | 8242 | ACAUUCA    | 8235 | 3 UTR | 0.0473 | 2 |
| <u>TMEM165</u>   | <u>NM_018475</u>    | 9  | 2859 | ACAUUCAAC  | 2851 | 3 UTR | 0.0135 | 2 |
| <u>TMEM173</u>   | <u>NM_198282</u>    | 7  | 696  | ACAUUCA    | 690  | 3 UTR | 0.0349 | 2 |
| <u>TMEM206</u>   | <u>NM_018252</u>    | 8  | 2543 | AACAUUCA   | 2536 | 3 UTR | 0.0379 | 1 |
| <u>TMEM22</u>    | <u>NM_025246</u>    | 8  | 3548 | AACAUUCA   | 3541 | 3 UTR | 0.0315 | 1 |
| <u>TMEM27</u>    | <u>NM_020665</u>    | 8  | 4165 | ACAUUCA    | 4158 | 3 UTR | 0.0253 | 2 |
| <u>TMEM30A</u>   | <u>NM_018247</u>    | 8  | 2828 | AACAUUCA   | 2821 | 3 UTR | 0.0074 | 1 |
| <u>TMEM33</u>    | <u>NM_018126</u>    | 7  | 2827 | ACAUUCA    | 2821 | 3 UTR | 0.0292 | 2 |
| <u>TMEM40</u>    | <u>NM_018306</u>    | 7  | 2338 | ACAUUCA    | 2332 | 3 UTR | 0.0335 | 2 |
| <u>TMEM41A</u>   | <u>NM_080652</u>    | 8  | 1536 | ACAUUCA    | 1529 | 3 UTR | 0.0149 | 2 |
| <u>TMEM45A</u>   | <u>NM_018004</u>    | 8  | 671  | AACAUUCA   | 664  | 3 UTR | 0.0141 | 1 |
| <u>TMEM64</u>    | <u>NM_001008495</u> | 8  | 4920 | AACAUUCA   | 4913 | 3 UTR | 0.0340 | 1 |
| <u>TMEM86A</u>   | <u>NM_153347</u>    | 9  | 3797 | ACAUUCAAC  | 3789 | 3 UTR | 0.0122 | 2 |
| <u>TMEM92</u>    | <u>NM_153229</u>    | 9  | 2344 | ACAUUCAAC  | 2336 | 3 UTR | 0.0092 | 2 |
| <u>TMPRSS11D</u> | <u>NM_004262</u>    | 7  | 1060 | ACAUUCA    | 1054 | 3 UTR | 0.0409 | 2 |
| <u>TMTC1</u>     | <u>NM_175861</u>    | 7  | 1615 | ACAUUCA    | 1609 | 3 UTR | 0.0115 | 2 |
| <u>TNF</u>       | <u>NM_000594</u>    | 8  | 2953 | ACAUUCA    | 2946 | 3 UTR | 0.0249 | 2 |
| <u>TNFAIP1</u>   | <u>NM_021137</u>    | 8  | 1251 | AACAUUCA   | 1244 | 3 UTR | 0.0237 | 1 |
| <u>TNFAIP6</u>   | <u>NM_007115</u>    | 7  | 1670 | AACAUUC    | 1664 | 3 UTR | 0.0479 | 1 |
| <u>TNFRSF11B</u> | <u>NM_002546</u>    | 7  | 2188 | ACAUUCA    | 2182 | 3 UTR | 0.0487 | 2 |
| <u>TNFSF15</u>   | <u>NM_005118</u>    | 8  | 3267 | ACAUUCA    | 3260 | 3 UTR | 0.0445 | 2 |
| <u>TNFSF4</u>    | <u>NM_003326</u>    | 8  | 1855 | ACAUUCA    | 1848 | 3 UTR | 0.0146 | 2 |
| <u>TNK1</u>      | <u>NM_003985</u>    | 7  | 581  | ACAUUCA    | 575  | 3 UTR | 0.0410 | 2 |
| <u>TNKS</u>      | <u>NM_003747</u>    | 8  | 1860 | AACAUUCA   | 1853 | 3 UTR | 0.0168 | 1 |
| <u>TNPO1</u>     | <u>NM_002270</u>    | 8  | 2995 | AACAUUCA   | 2988 | 3 UTR | 0.0361 | 1 |
| <u>TNS3</u>      | <u>NM_022748</u>    | 7  | 558  | ACAUUCA    | 552  | 3 UTR | 0.0259 | 2 |
| <u>TOM1L1</u>    | <u>NM_005486</u>    | 8  | 1250 | ACAUUCA    | 1243 | 3 UTR | 0.0035 | 2 |
| <u>TOM1L2</u>    | <u>NM_001082968</u> | 7  | 1277 | ACAUUCA    | 1271 | 3 UTR | 0.0294 | 2 |
| <u>TOPBP1</u>    | <u>NM_007027</u>    | 8  | 3192 | AACAUUCA   | 3185 | 3 UTR | 0.0371 | 1 |
| <u>TOR1A</u>     | <u>NM_000113</u>    | 9  | 2279 | AACAUUCA   | 2271 | 3 UTR | 0.0059 | 1 |
| <u>TOX</u>       | <u>NM_014729</u>    | 8  | 2278 | ACAUUCA    | 2271 | 3 UTR | 0.0235 | 2 |
| <u>TP63</u>      | <u>NM_003722</u>    | 8  | 3197 | AACAUUCA   | 3190 | 3 UTR | 0.0332 | 1 |

|                |                     |    |       |            |       |       |        |   |
|----------------|---------------------|----|-------|------------|-------|-------|--------|---|
| <u>TPP1</u>    | <u>NM_000391</u>    | 9  | 5877  | AACAUUCA   | 5869  | 3 UTR | 0.0231 | 1 |
| <u>TPX2</u>    | <u>NM_012112</u>    | 8  | 4284  | ACAUUCA    | 4277  | 3 UTR | 0.0410 | 2 |
| <u>TRADD</u>   | <u>NM_003789</u>    | 10 | 2922  | AACAUUCAAC | 2913  | 3 UTR | 0.0021 | 1 |
| <u>TRAK1</u>   | <u>NM_001042646</u> | 9  | 2921  | ACAUUCAAC  | 2913  | 3 UTR | 0.0084 | 2 |
| <u>TREML4</u>  | <u>NM_198153</u>    | 8  | 2356  | ACAUUCA    | 2349  | 3 UTR | 0.0232 | 2 |
| <u>TRIM23</u>  | <u>NM_001656</u>    | 7  | 1838  | ACAUUCA    | 1832  | 3 UTR | 0.0334 | 2 |
| <u>TRIM3</u>   | <u>NM_006458</u>    | 8  | 4981  | AACAUUCA   | 4974  | 3 UTR | 0.0367 | 1 |
| <u>TRIM35</u>  | <u>NM_171982</u>    | 8  | 1295  | AACAUUCA   | 1288  | 3 UTR | 0.0118 | 1 |
| <u>TRIM44</u>  | <u>NM_017583</u>    | 8  | 1211  | ACAUUCA    | 1204  | 3 UTR | 0.0118 | 2 |
| <u>TRIM61</u>  | <u>NM_001012414</u> | 7  | 845   | AACAUUC    | 839   | 3 UTR | 0.0118 | 1 |
| <u>TRPC1</u>   | <u>NM_003304</u>    | 8  | 2752  | ACAUUCA    | 2745  | 3 UTR | 0.0167 | 2 |
| <u>TRPC6</u>   | <u>NM_004621</u>    | 9  | 4967  | ACAUUCAAC  | 4959  | 3 UTR | 0.0253 | 2 |
| <u>TRSPAP1</u> | <u>NM_017846</u>    | 8  | 2796  | AACAUUCA   | 2789  | 3 UTR | 0.0243 | 1 |
| <u>TSC22D2</u> | <u>NM_014779</u>    | 7  | 297   | AACAUUC    | 291   | 3 UTR | 0.0105 | 1 |
| <u>TSG101</u>  | <u>NM_006292</u>    | 7  | 2238  | ACAUUCA    | 2232  | 3 UTR | 0.0379 | 2 |
| <u>TSGA14</u>  | <u>NM_018718</u>    | 7  | 2009  | ACAUUCA    | 2003  | 3 UTR | 0.0479 | 2 |
| <u>TSPAN8</u>  | <u>NM_004616</u>    | 8  | 1152  | AACAUUCA   | 1145  | 3 UTR | 0.0088 | 1 |
| <u>TSPYL4</u>  | <u>NM_021648</u>    | 7  | 1151  | ACAUUCA    | 1145  | 3 UTR | 0.0349 | 2 |
| <u>TTC23</u>   | <u>NM_001040655</u> | 8  | 3692  | ACAUUCA    | 3685  | 3 UTR | 0.0179 | 2 |
| <u>TTC30B</u>  | <u>NM_152517</u>    | 7  | 2766  | AACAUUC    | 2760  | 3 UTR | 0.0361 | 1 |
| <u>TTC5</u>    | <u>NM_138376</u>    | 8  | 2512  | ACAUUCA    | 2505  | 3 UTR | 0.0091 | 2 |
| <u>TTLL2</u>   | <u>NM_031949</u>    | 8  | 1688  | ACAUUCA    | 1681  | 3 UTR | 0.0081 | 2 |
| <u>TTLL7</u>   | <u>NM_024686</u>    | 7  | 2718  | AACAUUC    | 2712  | 3 UTR | 0.0426 | 1 |
| <u>TUBAL3</u>  | <u>NM_024803</u>    | 9  | 6996  | AACAUUCA   | 6988  | 3 UTR | 0.0165 | 1 |
| <u>TUBB</u>    | <u>NM_178014</u>    | 7  | 970   | ACAUUCA    | 964   | 3 UTR | 0.0181 | 2 |
| <u>TUBE1</u>   | <u>NM_016262</u>    | 10 | 1898  | AACAUUCAAC | 1889  | 3 UTR | 0.0030 | 1 |
| <u>TUFM</u>    | <u>NM_003321</u>    | 9  | 1897  | ACAUUCAAC  | 1889  | 3 UTR | 0.0121 | 2 |
| <u>TUSC3</u>   | <u>NM_006765</u>    | 9  | 1804  | AACAUUCA   | 1796  | 3 UTR | 0.0044 | 1 |
| <u>TWIST1</u>  | <u>NM_000474</u>    | 8  | 1803  | ACAUUCA    | 1796  | 3 UTR | 0.0176 | 2 |
| <u>TWISTNB</u> | <u>NM_001002926</u> | 9  | 3810  | AACAUUCA   | 3802  | 3 UTR | 0.0023 | 1 |
| <u>TXK</u>     | <u>NM_003328</u>    | 8  | 11729 | ACAUUCA    | 11722 | 3 UTR | 0.0093 | 2 |
| <u>TXLNA</u>   | <u>NM_175852</u>    | 8  | 3809  | ACAUUCA    | 3802  | 3 UTR | 0.0093 | 2 |
| <u>TXNDC10</u> | <u>NM_019022</u>    | 8  | 3770  | ACAUUCA    | 3763  | 3 UTR | 0.0093 | 2 |
| <u>TXNDC12</u> | <u>NM_015913</u>    | 8  | 10062 | AACAUUCA   | 10055 | 3 UTR | 0.0478 | 1 |
| <u>TXNDC15</u> | <u>NM_024715</u>    | 9  | 1379  | AACAUUCA   | 1371  | 3 UTR | 0.0016 | 1 |
| <u>UBAC2</u>   | <u>NM_177967</u>    | 8  | 1378  | ACAUUCA    | 1371  | 3 UTR | 0.0065 | 2 |
| <u>UBE2B</u>   | <u>NM_003337</u>    | 7  | 1366  | AACAUUC    | 1360  | 3 UTR | 0.0260 | 1 |
| <u>UBE2CBP</u> | <u>NM_198920</u>    | 9  | 1744  | AACAUUCA   | 1736  | 3 UTR | 0.0019 | 1 |
| <u>UBE2F</u>   | <u>NM_080678</u>    | 8  | 1743  | ACAUUCA    | 1736  | 3 UTR | 0.0076 | 2 |
| <u>UBE2J1</u>  | <u>NM_016021</u>    | 9  | 1472  | AACAUUCA   | 1464  | 3 UTR | 0.0020 | 1 |
| <u>UBE2W</u>   | <u>NM_001001481</u> | 8  | 1471  | ACAUUCA    | 1464  | 3 UTR | 0.0081 | 2 |

|               |                     |    |      |            |      |       |        |   |
|---------------|---------------------|----|------|------------|------|-------|--------|---|
| <u>UBP1</u>   | <u>NM_014517</u>    | 9  | 1535 | AACAUUCA   | 1527 | 3 UTR | 0.0012 | 1 |
| <u>UBQLNL</u> | <u>NM_145053</u>    | 8  | 1534 | ACAUUCA    | 1527 | 3 UTR | 0.0050 | 2 |
| <u>UBXD3</u>  | <u>NM_152376</u>    | 7  | 1734 | AACAUUC    | 1728 | 3 UTR | 0.0232 | 1 |
| <u>UBXD6</u>  | <u>NM_005671</u>    | 7  | 1292 | AACAUUC    | 1286 | 3 UTR | 0.0019 | 1 |
| <u>ULK1</u>   | <u>NM_003565</u>    | 7  | 760  | AACAUUC    | 754  | 3 UTR | 0.0078 | 1 |
| <u>USH2A</u>  | <u>NM_206933</u>    | 9  | 1967 | AACAUUCA   | 1959 | 3 UTR | 0.0012 | 1 |
| <u>USO1</u>   | <u>NM_003715</u>    | 8  | 1966 | ACAUUCA    | 1959 | 3 UTR | 0.0049 | 2 |
| <u>USP13</u>  | <u>NM_003940</u>    | 7  | 1793 | ACAUUCA    | 1787 | 3 UTR | 0.0368 | 2 |
| <u>USP33</u>  | <u>NM_015017</u>    | 9  | 4560 | AACAUUCA   | 4552 | 3 UTR | 0.0126 | 1 |
| <u>USP9Y</u>  | <u>NM_004654</u>    | 8  | 4559 | ACAUUCA    | 4552 | 3 UTR | 0.0495 | 2 |
| <u>UVRAG</u>  | <u>NM_003369</u>    | 9  | 7596 | AACAUUCA   | 7588 | 3 UTR | 0.0240 | 1 |
| <u>VBP1</u>   | <u>NM_003372</u>    | 7  | 1616 | ACAUUCA    | 1610 | 3 UTR | 0.0305 | 2 |
| <u>VCAM1</u>  | <u>NM_001078</u>    | 10 | 3931 | AACAUUCAAC | 3922 | 3 UTR | 0.0024 | 1 |
| <u>VCAN</u>   | <u>NM_004385</u>    | 9  | 3930 | ACAUUCAAC  | 3922 | 3 UTR | 0.0096 | 2 |
| <u>VGLL3</u>  | <u>NM_016206</u>    | 9  | 2721 | AACAUUCA   | 2713 | 3 UTR | 0.0073 | 1 |
| <u>VIP</u>    | <u>NM_003381</u>    | 8  | 2720 | ACAUUCA    | 2713 | 3 UTR | 0.0287 | 2 |
| <u>VPS13B</u> | <u>NM_017890</u>    | 8  | 3145 | ACAUUCA    | 3138 | 3 UTR | 0.0167 | 2 |
| <u>VPS33B</u> | <u>NM_018668</u>    | 9  | 9645 | ACAUUCAAC  | 9637 | 3 UTR | 0.0175 | 2 |
| <u>VPS37A</u> | <u>NM_152415</u>    | 8  | 5255 | AACAUUCA   | 5248 | 3 UTR | 0.0449 | 1 |
| <u>VPS41</u>  | <u>NM_014396</u>    | 8  | 3100 | AACAUUCA   | 3093 | 3 UTR | 0.0065 | 1 |
| <u>VRK3</u>   | <u>NM_016440</u>    | 7  | 3099 | ACAUUCA    | 3093 | 3 UTR | 0.0257 | 2 |
| <u>WASF1</u>  | <u>NM_003931</u>    | 7  | 813  | ACAUUCA    | 807  | 3 UTR | 0.0196 | 2 |
| <u>WASL</u>   | <u>NM_003941</u>    | 9  | 4003 | ACAUUCAAC  | 3995 | 3 UTR | 0.0092 | 2 |
| <u>WDFY1</u>  | <u>NM_020830</u>    | 7  | 1037 | AACAUUC    | 1031 | 3 UTR | 0.0371 | 1 |
| <u>WDFY3</u>  | <u>NM_014991</u>    | 8  | 1255 | AACAUUCA   | 1248 | 3 UTR | 0.0111 | 1 |
| <u>WDR21A</u> | <u>NM_015604</u>    | 7  | 1254 | ACAUUCA    | 1248 | 3 UTR | 0.0435 | 2 |
| <u>WDR21C</u> | <u>NM_152418</u>    | 10 | 9471 | AACAUUCAAC | 9462 | 3 UTR | 0.0074 | 1 |
| <u>WDR23</u>  | <u>NM_025230</u>    | 9  | 9470 | ACAUUCAAC  | 9462 | 3 UTR | 0.0292 | 2 |
| <u>WDR40B</u> | <u>NM_178470</u>    | 8  | 1232 | AACAUUCA   | 1225 | 3 UTR | 0.0120 | 1 |
| <u>WDR45L</u> | <u>NM_019613</u>    | 7  | 1231 | ACAUUCA    | 1225 | 3 UTR | 0.0471 | 2 |
| <u>WDR66</u>  | <u>NM_144668</u>    | 9  | 2164 | AACAUUCA   | 2156 | 3 UTR | 0.0084 | 1 |
| <u>WDR7</u>   | <u>NM_015285</u>    | 8  | 2163 | ACAUUCA    | 2156 | 3 UTR | 0.0330 | 2 |
| <u>WDR79</u>  | <u>NM_018081</u>    | 8  | 2990 | AACAUUCA   | 2983 | 3 UTR | 0.0468 | 1 |
| <u>WDR82</u>  | <u>NM_025222</u>    | 8  | 1053 | ACAUUCA    | 1046 | 3 UTR | 0.0266 | 2 |
| <u>WFS1</u>   | <u>NM_006005</u>    | 9  | 3607 | AACAUUCA   | 3599 | 3 UTR | 0.0060 | 1 |
| <u>WHDC1</u>  | <u>NM_001080435</u> | 8  | 3606 | ACAUUCA    | 3599 | 3 UTR | 0.0240 | 2 |
| <u>WIF1</u>   | <u>NM_007191</u>    | 8  | 2238 | ACAUUCA    | 2231 | 3 UTR | 0.0379 | 2 |
| <u>WNT11</u>  | <u>NM_004626</u>    | 8  | 4598 | AACAUUCA   | 4591 | 3 UTR | 0.0373 | 1 |
| <u>WNT16</u>  | <u>NM_057168</u>    | 8  | 4122 | ACAUUCA    | 4115 | 3 UTR | 0.0373 | 2 |
| <u>WNT5B</u>  | <u>NM_032642</u>    | 8  | 9076 | AACAUUCA   | 9069 | 3 UTR | 0.0181 | 1 |
| <u>WSB1</u>   | <u>NM_015626</u>    | 7  | 3204 | AACAUUC    | 3198 | 3 UTR | 0.0135 | 1 |

|                |                     |    |      |            |      |       |        |   |
|----------------|---------------------|----|------|------------|------|-------|--------|---|
| <u>WSCD1</u>   | <u>NM_015253</u>    | 9  | 3140 | AACAUUCA   | 3132 | 3 UTR | 0.0161 | 1 |
| <u>WTAP</u>    | <u>NM_004906</u>    | 8  | 1360 | ACAUUCA    | 1353 | 3 UTR | 0.0461 | 2 |
| <u>XG</u>      | <u>NM_175569</u>    | 7  | 1832 | AACAUUC    | 1826 | 3 UTR | 0.0232 | 1 |
| <u>XRRA1</u>   | <u>NM_182969</u>    | 9  | 1669 | ACAUUCAAC  | 1661 | 3 UTR | 0.0015 | 2 |
| <u>YIPF4</u>   | <u>NM_032312</u>    | 8  | 2949 | ACAUUCA    | 2942 | 3 UTR | 0.0486 | 2 |
| <u>YLPM1</u>   | <u>NM_019589</u>    | 8  | 3355 | AACAUUCA   | 3348 | 3 UTR | 0.0101 | 1 |
| <u>YOD1</u>    | <u>NM_018566</u>    | 7  | 3354 | ACAUUCA    | 3348 | 3 UTR | 0.0399 | 2 |
| <u>YTHDC1</u>  | <u>NM_001031732</u> | 8  | 4690 | AACAUUCA   | 4683 | 3 UTR | 0.0477 | 1 |
| <u>YTHDC2</u>  | <u>NM_022828</u>    | 8  | 3436 | ACAUUCA    | 3429 | 3 UTR | 0.0238 | 2 |
| <u>YTHDF2</u>  | <u>NM_016258</u>    | 9  | 2219 | AACAUUCA   | 2211 | 3 UTR | 0.0045 | 1 |
| <u>ZADH1</u>   | <u>NM_152444</u>    | 8  | 2218 | ACAUUCA    | 2211 | 3 UTR | 0.0178 | 2 |
| <u>ZADH2</u>   | <u>NM_175907</u>    | 7  | 1425 | AACAUUC    | 1419 | 3 UTR | 0.0394 | 1 |
| <u>ZBP1</u>    | <u>NM_030776</u>    | 7  | 2267 | ACAUUCA    | 2261 | 3 UTR | 0.0110 | 2 |
| <u>ZBTB2</u>   | <u>NM_020861</u>    | 8  | 4124 | ACAUUCA    | 4117 | 3 UTR | 0.0215 | 2 |
| <u>ZBTB33</u>  | <u>NM_006777</u>    | 8  | 2505 | AACAUUCA   | 2498 | 3 UTR | 0.0196 | 1 |
| <u>ZBTB4</u>   | <u>NM_020899</u>    | 8  | 3298 | AACAUUCA   | 3291 | 3 UTR | 0.0465 | 1 |
| <u>ZBTB43</u>  | <u>NM_014007</u>    | 8  | 2858 | ACAUUCA    | 2851 | 3 UTR | 0.0360 | 2 |
| <u>ZC3H11A</u> | <u>NM_014827</u>    | 7  | 1310 | ACAUUCA    | 1304 | 3 UTR | 0.0325 | 2 |
| <u>ZDHHC3</u>  | <u>NM_016598</u>    | 8  | 6419 | AACAUUCA   | 6412 | 3 UTR | 0.0403 | 1 |
| <u>ZFHX4</u>   | <u>NM_024721</u>    | 10 | 2263 | AACAUUCAAC | 2254 | 3 UTR | 0.0012 | 1 |
| <u>ZFP2</u>    | <u>NM_030613</u>    | 9  | 2262 | ACAUUCAAC  | 2254 | 3 UTR | 0.0046 | 2 |
| <u>ZFP36L2</u> | <u>NM_006887</u>    | 8  | 2664 | AACAUUCA   | 2657 | 3 UTR | 0.0285 | 1 |
| <u>ZFR</u>     | <u>NM_016107</u>    | 7  | 1387 | ACAUUCA    | 1381 | 3 UTR | 0.0164 | 2 |
| <u>ZFX</u>     | <u>NM_003410</u>    | 8  | 1152 | AACAUUCA   | 1145 | 3 UTR | 0.0112 | 1 |
| <u>ZFYVE16</u> | <u>NM_001105251</u> | 7  | 1151 | ACAUUCA    | 1145 | 3 UTR | 0.0440 | 2 |
| <u>ZFYVE26</u> | <u>NM_015346</u>    | 8  | 1323 | AACAUUCA   | 1316 | 3 UTR | 0.0193 | 1 |
| <u>ZFYVE27</u> | <u>NM_001002261</u> | 8  | 4009 | AACAUUCA   | 4002 | 3 UTR | 0.0030 | 1 |
| <u>ZKSCAN3</u> | <u>NM_024493</u>    | 7  | 4008 | ACAUUCA    | 4002 | 3 UTR | 0.0118 | 2 |
| <u>ZMAT1</u>   | <u>NM_032441</u>    | 7  | 1202 | ACAUUCA    | 1196 | 3 UTR | 0.0358 | 2 |
| <u>ZMYM1</u>   | <u>NM_024772</u>    | 7  | 3054 | AACAUUC    | 3048 | 3 UTR | 0.0075 | 1 |
| <u>ZNF124</u>  | <u>NM_003431</u>    | 8  | 3402 | AACAUUCA   | 3395 | 3 UTR | 0.0318 | 1 |
| <u>ZNF131</u>  | <u>NM_003432</u>    | 8  | 6160 | ACAUUCA    | 6153 | 3 UTR | 0.0074 | 2 |
| <u>ZNF133</u>  | <u>NM_003434</u>    | 7  | 5907 | ACAUUCA    | 5901 | 3 UTR | 0.0295 | 2 |
| <u>ZNF200</u>  | <u>NM_003454</u>    | 7  | 1498 | AACAUUC    | 1492 | 3 UTR | 0.0475 | 1 |
| <u>ZNF207</u>  | <u>NM_001098507</u> | 9  | 5695 | AACAUUCA   | 5687 | 3 UTR | 0.0182 | 1 |
| <u>ZNF212</u>  | <u>NM_012256</u>    | 9  | 2931 | AACAUUCA   | 2923 | 3 UTR | 0.0039 | 1 |
| <u>ZNF236</u>  | <u>NM_007345</u>    | 8  | 2930 | ACAUUCA    | 2923 | 3 UTR | 0.0157 | 2 |
| <u>ZNF248</u>  | <u>NM_021045</u>    | 8  | 3466 | AACAUUCA   | 3459 | 3 UTR | 0.0482 | 1 |
| <u>ZNF253</u>  | <u>NM_021047</u>    | 7  | 2017 | AACAUUC    | 2011 | 3 UTR | 0.0408 | 1 |
| <u>ZNF277</u>  | <u>NM_021994</u>    | 9  | 2513 | ACAUUCAAC  | 2505 | 3 UTR | 0.0082 | 2 |
| <u>ZNF280D</u> | <u>NM_017661</u>    | 8  | 1747 | AACAUUCA   | 1740 | 3 UTR | 0.0122 | 1 |

|        |              |   |       |           |       |       |        |   |
|--------|--------------|---|-------|-----------|-------|-------|--------|---|
| ZNF281 | NM_012482    | 7 | 1794  | ACAUUCA   | 1788  | 3 UTR | 0.0480 | 2 |
| ZNF329 | NM_024620    | 7 | 1746  | ACAUUCA   | 1740  | 3 UTR | 0.0480 | 2 |
| ZNF341 | NM_032819    | 9 | 2834  | AACAUUCA  | 2826  | 3 UTR | 0.0127 | 1 |
| ZNF345 | NM_003419    | 8 | 2833  | ACAUUCA   | 2826  | 3 UTR | 0.0500 | 2 |
| ZNF364 | NM_014455    | 8 | 2992  | AACAUUCA  | 2985  | 3 UTR | 0.0160 | 1 |
| ZNF398 | NM_020781    | 8 | 2575  | AACAUUCA  | 2568  | 3 UTR | 0.0160 | 1 |
| ZNF418 | NM_133460    | 9 | 2415  | AACAUUCA  | 2407  | 3 UTR | 0.0151 | 1 |
| ZNF419 | NM_001098491 | 9 | 2090  | ACAUUCAAC | 2082  | 3 UTR | 0.0173 | 2 |
| ZNF420 | NM_144689    | 9 | 4289  | ACAUUCAAC | 4281  | 3 UTR | 0.0204 | 2 |
| ZNF436 | NM_001077195 | 8 | 3529  | AACAUUCA  | 3522  | 3 UTR | 0.0387 | 1 |
| ZNF44  | NM_016264    | 8 | 4630  | AACAUUCA  | 4623  | 3 UTR | 0.0483 | 1 |
| ZNF479 | NM_033273    | 8 | 3397  | AACAUUCA  | 3390  | 3 UTR | 0.0483 | 1 |
| ZNF527 | NM_032453    | 8 | 2220  | AACAUUCA  | 2213  | 3 UTR | 0.0176 | 1 |
| ZNF540 | NM_152606    | 8 | 3395  | AACAUUCA  | 3388  | 3 UTR | 0.0036 | 1 |
| ZNF544 | NM_014480    | 7 | 3394  | ACAUUCA   | 3388  | 3 UTR | 0.0142 | 2 |
| ZNF545 | NM_133466    | 8 | 2207  | AACAUUCA  | 2200  | 3 UTR | 0.0144 | 1 |
| ZNF547 | NM_173631    | 9 | 1241  | ACAUUCAAC | 1233  | 3 UTR | 0.0052 | 2 |
| ZNF566 | NM_032838    | 7 | 2237  | ACAUUCA   | 2231  | 3 UTR | 0.0204 | 2 |
| ZNF571 | NM_016536    | 9 | 2865  | ACAUUCAAC | 2857  | 3 UTR | 0.0208 | 2 |
| ZNF575 | NM_174945    | 9 | 3907  | ACAUUCAAC | 3899  | 3 UTR | 0.0032 | 2 |
| ZNF586 | NM_017652    | 7 | 1569  | AACAUUC   | 1563  | 3 UTR | 0.0258 | 1 |
| ZNF594 | NM_032530    | 7 | 4642  | AACAUUC   | 4636  | 3 UTR | 0.0110 | 1 |
| ZNF598 | NM_178167    | 7 | 4347  | AACAUUC   | 4341  | 3 UTR | 0.0110 | 1 |
| ZNF610 | NM_173530    | 8 | 2969  | AACAUUCA  | 2962  | 3 UTR | 0.0271 | 1 |
| ZNF649 | NM_023074    | 7 | 3309  | AACAUUC   | 3303  | 3 UTR | 0.0469 | 1 |
| ZNF652 | NM_014897    | 8 | 2301  | AACAUUCA  | 2294  | 3 UTR | 0.0340 | 1 |
| ZNF654 | NM_018293    | 9 | 3484  | ACAUUCAAC | 3476  | 3 UTR | 0.0022 | 2 |
| ZNF655 | NM_001083956 | 7 | 1155  | AACAUUC   | 1149  | 3 UTR | 0.0398 | 1 |
| ZNF664 | NM_152437    | 8 | 15058 | ACAUUCA   | 15051 | 3 UTR | 0.0133 | 2 |
| ZNF667 | NM_022103    | 7 | 733   | ACAUUCA   | 727   | 3 UTR | 0.0321 | 2 |
| ZNF674 | NM_001039891 | 8 | 14365 | ACAUUCA   | 14358 | 3 UTR | 0.0198 | 2 |
| ZNF697 | NM_001080470 | 8 | 2127  | ACAUUCA   | 2120  | 3 UTR | 0.0105 | 2 |
| ZNF700 | NM_144566    | 7 | 2015  | ACAUUCA   | 2009  | 3 UTR | 0.0412 | 2 |
| ZNF750 | NM_024702    | 9 | 4432  | AACAUUCA  | 4424  | 3 UTR | 0.0018 | 1 |
| ZNF767 | NM_024910    | 8 | 4431  | ACAUUCA   | 4424  | 3 UTR | 0.0071 | 2 |
| ZNF781 | NM_152605    | 7 | 1010  | ACAUUCA   | 1004  | 3 UTR | 0.0293 | 2 |
| ZNF792 | NM_175872    | 8 | 2004  | AACAUUCA  | 1997  | 3 UTR | 0.0088 | 1 |
| ZNF800 | NM_176814    | 7 | 2003  | ACAUUCA   | 1997  | 3 UTR | 0.0345 | 2 |
| ZNF823 | NM_001080493 | 8 | 771   | AACAUUCA  | 764   | 3 UTR | 0.0218 | 1 |
| ZNF83  | NM_001105549 | 7 | 865   | AACAUUC   | 859   | 3 UTR | 0.0077 | 1 |
| ZNRF4  | NM_181710    | 8 | 3851  | ACAUUCA   | 3844  | 3 UTR | 0.0114 | 2 |

|               |                     |   |      |           |      |       |        |   |
|---------------|---------------------|---|------|-----------|------|-------|--------|---|
| <u>ZRANB2</u> | <u>NM_005455</u>    | 7 | 4317 | AACAUUC   | 4311 | 3 UTR | 0.0469 | 1 |
| <u>ZSWIM1</u> | <u>NM_080603</u>    | 7 | 3368 | ACAUUCA   | 3362 | 3 UTR | 0.0495 | 2 |
| <u>ZXDC</u>   | <u>NM_001040653</u> | 7 | 559  | ACAUUCA   | 553  | 3 UTR | 0.0225 | 2 |
| <u>ZZZ3</u>   | <u>NM_015534</u>    | 9 | 3265 | AACAUUCAA | 3257 | 3 UTR | 0.0107 | 1 |
